# Supplementary material
Source: publisher site journal article supplement (https://www.dovepress.com/article/343149)
Supplement: Supplementary file 1 [file get_supplementary_file.php]

Figure S1 Ethics Statement of Animal Experiment Study

SPF (Beijing) Biotechnology Co., Ltd.

Application Form for Laboratory Animal Welfare and Ethical review

Appl. Date:  
2020-11-10

Apr. Date:  
2020-11-15

IACUC Issue No.  
AW2020111501

| Project and Personnel Information                       |                                                                                                                                                                               |                    |                          |                                         |        |
|---------------------------------------------------------|-------------------------------------------------------------------------------------------------------------------------------------------------------------------------------|--------------------|--------------------------|-----------------------------------------|--------|
| Program                                                 | Study on the Mechanism of Yin-Huo-Tang in Preventing and Treating Recurrence of Non-small Cell Lung Cancer                                                                    |                    |                          |                                         |        |
| Name of Principal Investigator                          | Dianna Liu                                                                                                                                                                    | Professional Title | Assistant Researcher     |                                         |        |
| Department                                              | Oncology Department, Dongfang Hospital, Beijing University of Chinese Medicine                                                                                                | Tel. No            | 18810251922              |                                         |        |
| Contact Person                                          | Dianna Liu                                                                                                                                                                    | Tel. No            | 18810251922              |                                         |        |
| Information of Personnel Involved in Animal Experiments |                                                                                                                                                                               |                    |                          |                                         |        |
| Name                                                    | Department                                                                                                                                                                    | License No.        | Tel. No                  |                                         |        |
| Dianna Liu                                              | Oncology Department, Dongfang Hospital, Beijing University of Chinese Medicine                                                                                                | 1116040500247      | 18810251922              |                                         |        |
|                                                         |                                                                                                                                                                               |                    |                          |                                         |        |
|                                                         |                                                                                                                                                                               |                    |                          |                                         |        |
| Laboratory Animal Information                           |                                                                                                                                                                               |                    |                          |                                         |        |
| Animal origin                                           | <input type="checkbox"/> Production department <input checked="" type="checkbox"/><br><input type="checkbox"/> Procurement<br><input type="checkbox"/> International purchase |                    | Certification of fitness | Yes                                     |        |
| breed/strain                                            | <input type="checkbox"/> Rat _____<br><input type="checkbox"/> Mouse <u>C57BL/6</u><br><input type="checkbox"/> Other _____                                                   |                    | Grade                    | SPF <input checked="" type="checkbox"/> |        |
| Number (♀; ♂)                                           | ♀ _____;<br>♂ <u>50</u> _____;                                                                                                                                                | W/M Age            | 6-8week                  | Weight (g)                              | 18-22g |
| Experimental period                                     | December 1, 2020 to December 31, 2020                                                                                                                                         |                    |                          |                                         |        |

## Research Information

### **1. Experimental objective, necessity and significance and how the program has been designed to achieve the objectives of the research**

**Purpose:** The study aimed to explore the mechanism of YHT against the recurrence of lewis lung carcinoma mice.

**Animals and cells:** Fifty SPF C57BL/6 mice (50 males) weighing between 18 g and 22 g , Lewis lung cancer cell.

**Groups:**

The animals were randomly divided into five groups (n = 10/group): model (Mod), Cisplatin (Cis), YHT low-dose (YHT-L), YHT medium-dose (YHT-M) and YHT high-dose (YHT-H).

**Protocol:**

Lewis lung cancer cells ( $2 \times 10^6$  in 200  $\mu$ L serum-free DMEM) were injected s.c. into the right armpit of mice. The subcutaneous tumors were removed 14 days after lewis lung cancer cells injection. Then, all the mouses were given the drug treatment for 14 days. The Mod group and Cis group received normal saline (10 ml/kg/d, intragastric). The Cis group was given cisplatin (3mg/kg/d, intraperitoneal injection) once a week, all the other groups were given the same volume of saline (intraperitoneal injection). Group YHT-L, YHT-M and YHT-H received YHT (5.5575g/kg/d, 11.115g/kg/d, and 22.23g/kg/d, respectively, intragastric, calculated by dose of herbal medicines).

### **2. Description of the overall harms expected to be experienced by the animals – including details of the likely adverse effects of each protocol and the steps which will be taken to control these adverse effects**

**Expected harm:** Cisplatin is cytotoxic, and high doses of cisplatin can cause weight loss and even death in mice. The LLC cell line is highly invasive and grows rapidly, causing a serious tumor burden on mice.

**Prevention and control measures:** The previous study determined that the administration concentration of cisplatin was 3mg/kg, Qw. Closely observe the growth of mouse tumors during the experiment. When the longest diameter of the tumor exceeds 20 mm, the experiment is terminated.

### 3. Main observation target

On day 28 after the injection of tumor cells, all animals were sacrificed to collect relevant samples. Tumor tissues were completely stripped after all the animals had been sacrificed. One side of the tumor tissues was used for immunohistochemistry staining. The other tumor tissues were prepared for RNA Sequencing, PCR and WB analyses. Measure mouse body weight and tumor length and diameter every other day

### 4. Humane endpoint or experimental terminative indicator

The longest diameter of the tumor exceeds 20mm; the tumor grows rapidly to ulceration, causing infection or necrosis; rapid weight loss (rapidly losing 15%-20% of its original body weight); mice are weak and unable to eat and drink on their own; dying (in the absence of anesthesia or sedation, mice depressed with hypothermia); mice have abnormal central nervous system reactions (convulsions, tremors, paralysis, tilted heads, etc.)

### 5. Death conduct

- CO<sub>2</sub> suffocated
- Cervical dislocation
- Others, detailed description
- Exsanguinations with anesthesia
- Anesthesia overdose

When obtaining the material, the mice were anesthetized by intraperitoneal injection of 50 mg/kg sodium pentobarbital solution, and blood was collected from the eye vein.

### 6. Not for the death of the animal disposition

- Continue to use
- Save in the agency
- Release to the wild
- Others, detailed description

**7. Major measure for 3Rs**

Reduce the amount of animals: use 10 mice per group to avoid accidental increase in the number of experiments in the later period.

Reduce animal pain and injury: Use pentobarbital sodium to anesthetize mice; stop the experiment in time when the tumor is too large.

**8. Poisonous (harmful) material (infection, radiate, chemical poison and other) being used**

No

**Supplementary instruction for investigate**

No

**Declaration for the information disclosure and confidentiality requirements, declaring the information need to be kept secret, the information can be disclosed**

All the information can be disclosed.

**Claiming jurors for being debarb**

No

**Declaration:**

1. I will abide by the law and regulation stipulation, and accept the supervision and inspection by the IACUC and laboratory animal department.
2. The information I have given is accurate, detailed and comprehensive.

Declarant: Signature (stamp) of PI

Dianna Liu

Signature (stamp) of Director of animal experiment  
Dianna Liu

November 1, 2020

Approval opinion

Approval

Authorized Personnel Signature (Stamp)

The Animal Ethics Committee of the SPF (Beijing)  
Biotechnology Co.,Ltd.

November 15, 2020

Notice

1. A project should fill out one IACUC application.
2. Application form should be fill in completely, submit to IACUC for approval. We guarantee to reply in 10 working days..
3. After being approved, the PI signed hard copy need to be submitted to the office of IACUC.
4. If the project need be adjusted during experiment, please fill in “the animal care and use revised protocol”.

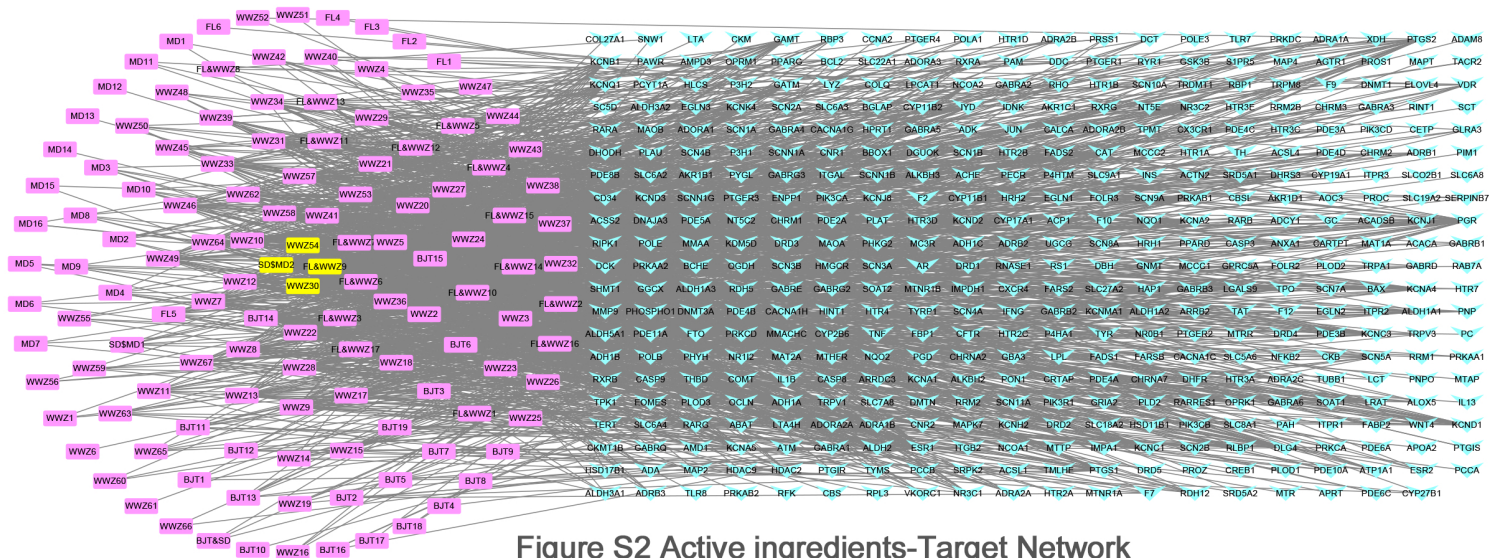

Figure S2 Active ingredients-Target Network

Table S1 Candidate Compounds of YHT

| Chinese herbal name | Component                                                                       | MOLID/Compound CID | Databases  |
|---------------------|---------------------------------------------------------------------------------|--------------------|------------|
| Bajitian            | 3beta-24S(R)-butyl-5-alkenyl-cholestol                                          | MOL009525          | TCMSP      |
| Bajitian            | 5alpha-Hydroxy-2alpha-(Alpha-Methylbutyryl)-Oxy-7beta.9alpha.10beta-Triacetoxv- | 5318282            | BATMAN-TCM |
| Bajitian            | Alizarin-2-methylether                                                          | MOL006147          | TCMSP      |
| Bajitian            | americanin A                                                                    | MOL009537          | TCMSP      |
| Bajitian            | Ascorbic Acid                                                                   | 54670067           | BATMAN-TCM |
| Bajitian            | beta-sitosterol                                                                 | MOL000358          | TCMSP      |
| Bajitian            | Diop                                                                            | MOL002879          | TCMSP      |
| Bajitian            | Ethyl oleate (NF)                                                               | MOL002883          | TCMSP      |
| Bajitian            | isoprincepin                                                                    | MOL009551          | TCMSP      |
| Bajitian            | Ohioensin A                                                                     | MOL009562          | TCMSP      |
| Bajitian            | 1,5,7-trihydroxy-6-methoxy-2-methoxymethylanthracenequinone                     | MOL009496          | TCMSP      |
| Bajitian            | 1-Hydroxy-2-Methyl-Anthraquinone                                                | 160817             | BATMAN-TCM |
| Bajitian            | 1-hydroxy-6-hydroxymethylanthracenequinone                                      | MOL009504          | TCMSP      |
| Bajitian            | 2-hydroxy-1,5-dimethoxy-6-(methoxymethyl)-9,10-anthraquinone                    | MOL009495          | TCMSP      |
| Bajitian            | 2-hydroxy-1,8-dimethoxy-7-methoxymethylanthracenequinone                        | MOL009513          | TCMSP      |
| Bajitian            | 2-Hydroxyanthraquinone                                                          | 11796              | BATMAN-TCM |
| Bajitian            | 3beta,20(R),5-alkenyl-stigmastol                                                | MOL009524          | TCMSP      |
| Bajitian            | Supraene                                                                        | MOL001506          | TCMSP      |
| Bajitian            | 1,6-dihydroxy-5-methoxy-2-(methoxymethyl)-9,10-anthraquinone                    | MOL009500          | TCMSP      |

|                |                                                                                                  |           |            |
|----------------|--------------------------------------------------------------------------------------------------|-----------|------------|
| Bajitian       | 1-hydroxy-3-methoxy-9,10-anthraquinone                                                           | MOL009503 | TCMSP      |
| Bajitian       | (2R,3S)-(+)-3',5-Dihydroxy-4,7-dimethoxydihydroflavonol                                          | MOL009519 | TCMSP      |
| Bajitian       | Asperuloside tetraacetate                                                                        | MOL009541 | TCMSP      |
| Bajitian       | 2-hydroxyethyl 5-hydroxy-2-(2-hydroxybenzoyl)-4-(hydroxymethyl)benzoate                          | MOL009558 | TCMSP      |
| Bajitian&Shudi | sitosterol                                                                                       | MOL000359 | TCMSP      |
| Fuling         | (2R)-2-[(3S,5R,10S,13R,14R,16R,17R)-3,16-dihydroxy-4,4,10,13,14-                                 | MOL000273 | TCMSP      |
| Fuling         | Cerevisterol                                                                                     | MOL000279 | TCMSP      |
| Fuling         | ergosta-7,22E-dien-3beta-ol                                                                      | MOL000282 | TCMSP      |
| Fuling         | Ergosterol peroxide                                                                              | MOL000283 | TCMSP      |
| Fuling         | hederagenin                                                                                      | MOL000296 | TCMSP      |
| Fuling         | trametenolic acid                                                                                | MOL000275 | TCMSP      |
| Fuling         | 7,9(11)-dehydropachymic acid                                                                     | MOL000276 | TCMSP      |
| Fuling         | (2R)-2-[(3S,5R,10S,13R,14R,16R,17R)-3,16-dihydroxy-4,4,10,13,14-                                 | MOL000280 | TCMSP      |
| Fuling         | (2R)-2-[(5R,10S,13R,14R,16R,17R)-16-hydroxy-3-keto-4,4,10,13,14-pentamethyl-1,2,5,6,12,15,16,17- | MOL000285 | TCMSP      |
| Fuling         | 3beta-Hydroxy-24-methylene-8-lanostene-21-oic acid                                               | MOL000287 | TCMSP      |
| Fuling         | Poricoic acid A                                                                                  | MOL000290 | TCMSP      |
| Fuling         | poricoic acid C                                                                                  | MOL000292 | TCMSP      |
| Fuling&Wuweizi | 10-Hydroxyacetyl baccatin VI                                                                     | 5318131   | BATMAN-TCM |
| Fuling&Wuweizi | Hydrangeic Acid                                                                                  | 5318116   | BATMAN-TCM |
| Fuling&Wuweizi | Lauric Aldehyde                                                                                  | 8194      | BATMAN-TCM |
| Fuling&Wuweizi | O-Acetyl pachymic Acid-25-OI                                                                     | 5316009   | BATMAN-TCM |



|                |                              |           |                     |
|----------------|------------------------------|-----------|---------------------|
| Fuling&Wuweizi | Pachymic Acid                | MOL000289 | TCMSP               |
| Fuling&Wuweizi | P-Hydroxybenzyl Alcohol      |           | 125 BATMAN-TCM      |
| Fuling&Wuweizi | Poricoic Acid B              | MOL000291 | TCMSP               |
| Fuling&Wuweizi | Turanose                     |           | 5460935 BATMAN-TCM  |
| Fuling&Wuweizi | Undecan-2-Ol                 |           | 15448 BATMAN-TCM    |
| Fuling&Wuweizi | 20-Hexadecanoylingenol       |           | 5318035 BATMAN-TCM  |
| Fuling&Wuweizi | Adenine                      |           | 190 BATMAN-TCM      |
| Fuling&Wuweizi | Beta-Amyrin Acetate          |           | 92156 BATMAN-TCM    |
| Fuling&Wuweizi | Choline                      |           | 305 BATMAN-TCM      |
| Fuling&Wuweizi | Dehydroeburicoicacid         | MOL000300 | TCMSP               |
| Fuling&Wuweizi | Eburicol                     |           | 9803310 BATMAN-TCM  |
| Fuling&Wuweizi | Ergosterol                   |           | 444679 BATMAN-TCM   |
| Fuling&Wuweizi | Ergotamine                   |           | 8223 BATMAN-TCM     |
| Maidong        | 6-Aldehydo-Isoophipogonone B |           | 5317212 BATMAN-TCM  |
| Maidong        | Ophiopogonanone E            |           | 5316797 BATMAN-TCM  |
| Maidong        | Ophiopogonin A               |           | 46173858 BATMAN-TCM |
| Maidong        | Ophiopogonin B               |           | 46173857 BATMAN-TCM |
| Maidong        | Ophiopogonin C               |           | 4483248 BATMAN-TCM  |
| Maidong        | Ophiopogonin D               |           | 46173859 BATMAN-TCM |
| Maidong        | Ophiopogonone B              |           | 14826840 BATMAN-TCM |
| Maidong        | Orchinol                     |           | 181686 BATMAN-TCM   |

|               |                          |           |            |
|---------------|--------------------------|-----------|------------|
| Maidong       | Guanosine                | 135398635 | BATMAN-TCM |
| Maidong       | Methyl Ophiopogonanone A | 5318201   | BATMAN-TCM |
| Maidong       | Methyl Ophiopogonanone B | 5318201   | BATMAN-TCM |
| Maidong       | N-Trans-Feruloyltyramine | 5280537   | BATMAN-TCM |
| Maidong       | Ophiopogon A             | 11968810  | BATMAN-TCM |
| Maidong       | Ophiopogon B             | 46173857  | BATMAN-TCM |
| Maidong       | Ophiopogonanone A        | 9996586   | BATMAN-TCM |
| Maidong       | Ophiopogonanone C        | 10871974  | BATMAN-TCM |
| Shudi&Maidong | Uridine                  | 6029      | BATMAN-TCM |
| Shudi&Maidong | Stigmasterol             | MOL000449 | TCMSP      |
| Wuweizi       | Gomisin G                | MOL008974 | TCMSP      |
| Wuweizi       | Interiotherin B          | MOL009199 | TCMSP      |
| Wuweizi       | changnanic acid          | MOL009200 | TCMSP      |
| Wuweizi       | Kadsulignan C            | MOL009210 | TCMSP      |
| Wuweizi       | kadsulactone             | MOL009211 | TCMSP      |
| Wuweizi       | neokadsuranic acid A     | MOL009217 | TCMSP      |
| Wuweizi       | neokadsuranic acid B     | MOL009218 | TCMSP      |
| Wuweizi       | schisanlactone A         | MOL009222 | TCMSP      |
| Wuweizi       | schisanlactone E         | MOL009224 | TCMSP      |
| Wuweizi       | schizandronic acid       | MOL009229 | TCMSP      |
| Wuweizi       | angusifolin B            | MOL009235 | TCMSP      |

|         |                                              |           |                     |
|---------|----------------------------------------------|-----------|---------------------|
| Wuweizi | (+)-Gomisin K3                               |           | 73057 BATMAN-TCM    |
| Wuweizi | (E)-9-Isopropyl-6-Methyl-5,9-Decadiene-2-One |           | 5318635 BATMAN-TCM  |
| Wuweizi | Beta-Santalol                                |           | 6857681 BATMAN-TCM  |
| Wuweizi | Beta-Sesquiphellandrene                      |           | 12315492 BATMAN-TCM |
| Wuweizi | Camphene                                     |           | 6616 BATMAN-TCM     |
| Wuweizi | Campherenol                                  |           | 91747494 BATMAN-TCM |
| Wuweizi | Chamissonin Diacetate                        |           | 5281433 BATMAN-TCM  |
| Wuweizi | Citral                                       |           | 638011 BATMAN-TCM   |
| Wuweizi | Citraurin Beta                               |           | 9845703 BATMAN-TCM  |
| Wuweizi | Citronellol                                  |           | 8842 BATMAN-TCM     |
| Wuweizi | Citronellyl Acetate                          |           | 9017 BATMAN-TCM     |
| Wuweizi | 3-Phenyldecane                               |           | 20740 BATMAN-TCM    |
| Wuweizi | 1-(1,5-Dimethyl-4-Hexenyl)-4-Methyl Benzene  |           | 92139 BATMAN-TCM    |
| Wuweizi | Clovene                                      |           | 10102 BATMAN-TCM    |
| Wuweizi | Clupanodonic Acid                            |           | 5497182 BATMAN-TCM  |
| Wuweizi | Cuparene                                     |           | 86895 BATMAN-TCM    |
| Wuweizi | Delta-Terpineol                              |           | 81722 BATMAN-TCM    |
| Wuweizi | Deoxyharringtonine                           | MOL005317 | TCMSP               |
| Wuweizi | Deoxyschizandrin                             |           | 15250826 BATMAN-TCM |
| Wuweizi | Deoxyshikonin                                |           | 98914 BATMAN-TCM    |
| Wuweizi | D-Limonene                                   |           | 440917 BATMAN-TCM   |

|         |                                     |           |          |            |
|---------|-------------------------------------|-----------|----------|------------|
| Wuweizi | Elemicin                            |           | 10248    | BATMAN-TCM |
| Wuweizi | 4-Phenylbicyclo[2.2.2]Octan-1-Ol    |           | 327096   | BATMAN-TCM |
| Wuweizi | Epiguaipyridine                     |           | 5317082  | BATMAN-TCM |
| Wuweizi | Epsilon-Cadinene                    |           | 12302130 | BATMAN-TCM |
| Wuweizi | Gama-Octalactone                    |           | 86852    | BATMAN-TCM |
| Wuweizi | Gamma-Selinene                      |           | 521334   | BATMAN-TCM |
| Wuweizi | Geraniol                            |           | 637566   | BATMAN-TCM |
| Wuweizi | Gomisin R                           | MOL008978 |          | TCMSP      |
| Wuweizi | 1-Methyl-4-Methylethenylcyclohexene |           | 5319725  | BATMAN-TCM |
| Wuweizi | Gomisin T                           |           | 5317805  | BATMAN-TCM |
| Wuweizi | Gomisin-A                           | MOL008968 |          | TCMSP      |
| Wuweizi | Hexahydrocurcumin                   |           | 5318039  | BATMAN-TCM |
| Wuweizi | Alpha-Cuparenol                     |           | 5316200  | BATMAN-TCM |
| Wuweizi | Hexahydroxytaxadiene                |           | 5318040  | BATMAN-TCM |
| Wuweizi | Isolongifolene                      |           | 11127402 | BATMAN-TCM |
| Wuweizi | Isolychnose                         |           | 440185   | BATMAN-TCM |
| Wuweizi | kadsulignan B                       | MOL009213 |          | TCMSP      |
| Wuweizi | Linalool                            |           | 6549     | BATMAN-TCM |
| Wuweizi | 1-Phenyl-1,3-Butanedion             |           | 7166     | BATMAN-TCM |
| Wuweizi | Longifolene                         |           | 289151   | BATMAN-TCM |
| Wuweizi | Longikaurin A                       | MOL004624 |          | TCMSP      |

|         |                                 |           |          |            |
|---------|---------------------------------|-----------|----------|------------|
| Wuweizi | Longispinogenin                 |           | 12305725 | BATMAN-TCM |
| Wuweizi | Myrcene                         |           | 31253    | BATMAN-TCM |
| Wuweizi | Alpha-Limonene                  |           | 22311    | BATMAN-TCM |
| Wuweizi | Myricadiol                      |           | 3084282  | BATMAN-TCM |
| Wuweizi | neokadsuranic acid C            | MOL009219 |          | TCMSP      |
| Wuweizi | neokadsuranin                   | MOL009220 |          | TCMSP      |
| Wuweizi | Nonylphenol                     |           | 67296    | BATMAN-TCM |
| Wuweizi | Nootkatone                      |           | 1268142  | BATMAN-TCM |
| Wuweizi | 2-(P-Cyclohexyl-Phenoxy)Ethanol |           | 160168   | BATMAN-TCM |
| Wuweizi | P-Cymene                        |           | 7463     | BATMAN-TCM |
| Wuweizi | Phenyl-2-Propanone              |           | 7678     | BATMAN-TCM |
| Wuweizi | Phenylpropyl Alcohol            |           | 561514   | BATMAN-TCM |
| Wuweizi | Pregomisin                      |           | 181796   | BATMAN-TCM |
| Wuweizi | Angeloylgomisin O               | MOL008956 |          | TCMSP      |
| Wuweizi | Schisanhenol                    |           | 73057    | BATMAN-TCM |
| Wuweizi | Schizandrer B                   | MOL008957 |          | TCMSP      |
| Wuweizi | Sesquicarene                    |           | 11074502 | BATMAN-TCM |
| Wuweizi | Terpinen-4-Ol                   |           | 11230    | BATMAN-TCM |
| Wuweizi | Thujopsene                      |           | 442402   | BATMAN-TCM |
| Wuweizi | Vitamin K1                      |           | 5284607  | BATMAN-TCM |
| Wuweizi | Wuweizisu C                     | MOL008992 |          | TCMSP      |

|         |                             |                     |
|---------|-----------------------------|---------------------|
| Wuweizi | 2-Isopropyl-5-Methylanisole | 14104 BATMAN-TCM    |
| Wuweizi | Beta-Bisabolene             | 10104370 BATMAN-TCM |
| Wuweizi | Beta-Chamigrene             | 442353 BATMAN-TCM   |
| Wuweizi | Beta-Pinene                 | 14896 BATMAN-TCM    |

Table S2 Targets of YHT and LUAD Recurrence

| Targets of YHT | Targets of LUAD recurrence | The common targets between drug and disease |
|----------------|----------------------------|---------------------------------------------|
| FOLR2          | ALPQTL2                    | FOLR2                                       |
| SLC5A6         | SAI1                       | SLC5A6                                      |
| PCCA           | MTS1                       | PCCA                                        |
| MUT            | TFS1                       | PC                                          |
| ACACB          | SSU72                      | MTRR                                        |
| PC             | TNFRSF9                    | ACACA                                       |
| MTRR           | ILA                        | MCCC1                                       |
| ACACA          | CD137                      | MCCC2                                       |
| PDXK           | RERE                       | MTR                                         |
| MCCC1          | NEDBEH                     | SLC19A2                                     |
| BLVRB          | MTOR                       | HLCS                                        |
| MCCC2          | FRAP1                      | FOLR3                                       |
| MTR            | SKS                        | MMACHC                                      |
| SLC19A2        | SDHB                       | TPK1                                        |
| HLCS           | SDH2                       | RFK                                         |
| FOLR3          | SDHIP                      | PCCB                                        |
| MMACHC         | PGL4                       | MMAA                                        |
| TPK1           | PLA2G2A                    | VDR                                         |
| RFK            | PLA2B                      | MTHFR                                       |
| PCCB           | PLA2L                      | GLRA3                                       |
| MMAA           | MOM1                       | PRKCA                                       |
| VDR            | MUL1                       | HMGCR                                       |
| MTHFR          | MULAN                      | ITGB2                                       |

|        |          |        |
|--------|----------|--------|
| GLRA3  | C1orf166 | GABRB3 |
| PRKCA  | DDOST    | ITGAL  |
| HMGCR  | OST      | HDAC2  |
| ITGB2  | OST48    | PRKCD  |
| GABRB3 | CDG1R    | SOAT1  |
| ITGAL  | HSPG2    | MTTP   |
| HDAC2  | PLC      | CNR2   |
| PRKCD  | SJS      | CNR1   |
| SOAT1  | SJA      | SOAT2  |
| MTTP   | SJS1     | DRD2   |
| CNR2   | EPHB2    | PAWR   |
| CNR1   | EPHT3    | KDM5D  |
| SOAT2  | DRT      | ALKBH3 |
| DRD2   | ERK      | TMLHE  |
| PAWR   | PCBC     | P4HTM  |
| KDM5D  | CAPB     | PLOD1  |
| ALKBH3 | BDPLT22  | EGLN2  |
| OGFOD2 | ID3      | ALKBH2 |
| P3H3   | RCAN3    | BBOX1  |
| TMLHE  | DSCR1L2  | PAM    |
| P4HTM  | MCIP3    | DBH    |
| PLOD1  | CNKSR1   | EGLN3  |
| EGLN2  | CNK1     | PLOD3  |
| ALKBH2 | DHDDS    | P4HA1  |
| BBOX1  | HDS      | EGLN1  |



|         |          |          |
|---------|----------|----------|
| PAM     | RP59     | P3H2     |
| SLC23A1 | DEDSM    | LCT      |
| OGFOD1  | CHC1     | PLOD2    |
| DBH     | RCC1     | P3H1     |
| EGLN3   | RNU17A   | PHYH     |
| PLOD3   | RNE1     | SLC27A2  |
| P4HA1   | CCDC28B  | CRTAP    |
| EGLN1   | MGC1203  | GBA3     |
| P3H2    | RSP01    | MAPK7    |
| LCT     | FLJ40906 | MC3R     |
| PLOD2   | HEYL     | CACNA1G  |
| P3H1    | ELOVL1   | FTO      |
| PHYH    | SSC1     | ESR1     |
| SLC27A2 | IKSHD    | PCYT1A   |
| CRTAP   | SZT2     | PHOSPHO1 |
| GBA3    | KIAA0467 | ACHE     |
| JMJD6   | EIEE18   | PLD2     |
| PGLYRP2 | PTPRF    | BCHE     |
| MAPK7   | LAR      | COLQ     |
| MC3R    | BNAH2    | CYP27B1  |
| CACNA1G | MUTYH    | GC       |
| SLC23A2 | MYH      | SNW1     |
| FTO     | TOE1     | RXRB     |
| ESR1    | PCH7     | SRD5A1   |
| PLD1    | MMACHC   | CYP17A1  |

|          |             |         |
|----------|-------------|---------|
| PCYT1A   | RAD54L      | SLC8A1  |
| PCYT1B   | HR54        | F12     |
| PHOSPHO1 | HRAD54      | RARRES1 |
| ACHE     | STIL        | NROB1   |
| PLD2     | SIL         | TRPV1   |
| BCHE     | MCPH7       | RARG    |
| COLQ     | OPHLC       | PTGER1  |
| CYP27B1  | C1DUPp31. 3 | PTGER4  |
| GC       | DUP1p31. 3  | PGR     |
| SNW1     | DOCK7       | AR      |
| RXRB     | KIAA1771    | NR3C1   |
| SRD5A1   | EIEE23      | RARB    |
| CYP17A1  | ALG6        | RXRG    |
| SLC8A1   | CDG1C       | OPRK1   |
| F12      | ITGB3BP     | FADS2   |
| RARRES1  | NRIF3       | FADS1   |
| NROB1    | PGM1        | PTGER2  |
| TRPV1    | GSD14       | PTGS1   |
| RARG     | CDG1T       | PTGER3  |
| PTGER1   | WLS         | PTGS2   |
| PTGER4   | GPR177      | ELOVL4  |
| PGR      | EVI         | ALDH1A1 |
| AR       | TYW3        | RARA    |
| NR3C1    | ACADM       | ANXA1   |
| RARB     | MCAD        | GPRC5A  |

|         |         |         |
|---------|---------|---------|
| RXRG    | FAM73A  | RXRA    |
| OPRK1   | MIGA1   | ALDH1A2 |
| FADS2   | UOX     | NR3C2   |
| FADS1   | GFI1    | CYP19A1 |
| PTGER2  | ZNF163  | PNPO    |
| PTGS1   | SCN2    | IMPA1   |
| PTGER3  | DR1     | AKR1C1  |
| PTGS2   | BCAR3   | MAP2    |
| ELOVL4  | SH2D3B  | BCL2    |
| ALDH1A1 | NSP2    | NR1I2   |
| RARA    | DBT     | MAPT    |
| ANXA1   | BCATE2  | TUBB1   |
| GPRC5A  | HENMT1  | MAP4    |
| RXRA    | C1orf59 | IFNG    |
| ALDH1A2 | HEN1    | TPMT    |
| NR3C2   | RBM15   | LGALS9  |
| PTGFR   | SPEN    | OCLN    |
| CYP19A1 | OTT     | ADAM8   |
| PNPO    | LAMTOR5 | EOMES   |
| IMPA1   | HBXIP   | DNAJA3  |
| AKR1C1  | XIP     | ADORA2A |
| MAP2    | C1orf88 | ADORA2B |
| BCL2    | PIFO    | ADORA3  |
| NR1I2   | ST7L    | ADORA1  |
| MAPT    | ST7R    | FBP1    |

|         |          |        |
|---------|----------|--------|
| TUBB1   | MOV10    | PRKAB1 |
| TUBA4A  | KIAA1631 | ACSS2  |
| MAP4    | NRAS     | POLE   |
| IFNG    | ALPS4    | CBS    |
| TPMT    | NS6      | POLE3  |
| LGALS9  | CMNS     | ADCY1  |
| OCLN    | NCMS     | COMT   |
| ADAM8   | SIKE     | POLA1  |
| EOMES   | FCGR1B   | DCK    |
| DNAJA3  | FCGR1C   | RRM2B  |
| ADORA2A | NBPF15   | ADK    |
| ADORA2B | MGC8902  | GNMT   |
| ADORA3  | PIAS3    | PNP    |
| ADORA1  | FCGR1A   | PDE4D  |
| FBP1    | IGFR1    | CBSL   |
| PRKAB1  | CD64     | RRM2   |
| ACSS2   | CIART    | PRKAA1 |
| POLE    | CHRONO   | MAT1A  |
| CBS     | GM129    | CREB1  |
| POLE3   | RPRD2    | PIM1   |
| ADCY1   | FALEC    | PYGL   |
| COMT    | FAL1     | HINT1  |
| POLA1   | VPS72    | MAT2A  |
| DCK     | CFL1     | AMD1   |
| RRM2B   | YL1      | ACSL1  |

|        |          |        |
|--------|----------|--------|
| ADK    | ZNF687   | PDE4B  |
| GNMT   | KIAA1441 | PRKAB2 |
| PNP    | PDB6     | RRM1   |
| PDE4D  | LCE3D    | KCND1  |
| CBSL   | LEP16    | ADH1A  |
| RRM2   | CHTOP    | GAMT   |
| PRKAA1 | C10orf77 | KCNC3  |
| MAT1A  | SRAG     | KCNA1  |
| CREB1  | FOP      | KCNA2  |
| ACSS1  | TPM3     | TPO    |
| PIM1   | NEM1     | CAT    |
| PYGL   | CFTD     | KCNB1  |
| POLE2  | CAPM1    | ADH1B  |
| HINT1  | IL6R     | DLG4   |
| MAT2A  | IL6RQ    | KCNC1  |
| AMD1   | IL6Q     | ADH1C  |
| ACSL1  | PYG02    | KCNA5  |
| PDE4B  | PKLR     | RNASE1 |
| PRKAB2 | PK1      | KCND2  |
| POLE4  | MEX3A    | ALDH2  |
| RRM1   | SMG5     | KCNA4  |
| KCND1  | EST1B    | KCND3  |
| KCNA3  | KIAA1089 | GATM   |
| ADH1A  | NTRK1    | KCNK4  |
| KCNA10 | TRKA     | IYD    |

|         |        |         |
|---------|--------|---------|
| GAMT    | ATP1A2 | KCNQ1   |
| KCNC3   | FHM2   | RBP3    |
| KCNA1   | MHP2   | DHRS3   |
| KCNA2   | COPA   | RDH5    |
| TPO     | AILJK  | ALDH1A3 |
| CAT     | LY9    | RDH12   |
| KCNB1   | FCER1G | RBP1    |
| ADH1B   | APOA2  | RLBP1   |
| DLG4    | FCGR2A | LRAT    |
| KCNC2   | IGFR2  | ADRA1A  |
| KCNC1   | CD32   | HTR2A   |
| ADH1C   | FCGR3A | ADRA2A  |
| KCNB2   | CD16   | HTR1B   |
| KCNA5   | IGFR3  | HTR2C   |
| RNASE1  | IMD20  | HTR1D   |
| KCND2   | FCGR2C | HTR1A   |
| ALDH2   | CD32C  | ADRA1B  |
| KCNA4   | FCGR3B | DRD5    |
| KCNA7   | FCGR2B | DRD1    |
| KCNA6   | RGS4   | ADRA2B  |
| KCND3   | RGS5   | SLC6A2  |
| GUCY1B3 | NUF2   | HTR2B   |
| GATM    | NUF2R  | DRD4    |
| KCNK4   | CDCA1  | HTR7    |
| IYD     | PBX1   | ADRA2C  |

|         |           |         |
|---------|-----------|---------|
| KCNQ1   | CAKUHED   | DRD3    |
| RDH11   | MAEL      | DNMT3A  |
| RBP3    | CREG1     | PHKG2   |
| RETSAT  | SCYL3     | CHRNA7  |
| RDH13   | PACE1     | INS     |
| DHRS3   | FMO2      | SLC22A1 |
| RDH5    | EEF1AKNMT | CD34    |
| ALDH1A3 | METTL13   | CALCA   |
| RDH12   | FEAT      | HTR4    |
| DHRS4   | KIAA0859  | GABRA2  |
| RBP1    | DFNB26M   | GABRD   |
| RLBP1   | MIR3120   | GABRB1  |
| RDH14   | FASLG     | GABRG3  |
| RDH8    | TNFSF6    | GABRE   |
| LRAT    | APT1LG1   | GABRA3  |
| ADRA1A  | FASL      | GABRA4  |
| HTR2A   | ALPS1B    | GABRB2  |
| ADRA2A  | RGSL2     | HTR3D   |
| HTR1B   | PDCN      | GABRQ   |
| HTR2C   | NPHS2     | GABRA5  |
| ADRA1D  | SRN1      | HTR3E   |
| HTR1D   | RGSL1     | GABRA6  |
| HTR1F   | RNASL     | HTR3A   |
| HTR1A   | RNS4      | GABRA1  |
| ADRA1B  | PRCA1     | GABRG2  |

|         |          |         |
|---------|----------|---------|
| DRD5    | HPC1     | SLC02B1 |
| DRD1    | RGS16    | HTR3C   |
| ADRA2B  | SMG7     | TRPV3   |
| SLC6A2  | EST1C    | TRPM8   |
| HTR2B   | KIAA0250 | TRPA1   |
| DRD4    | NCF2     | SCN11A  |
| HTR7    | ODR4     | SCN2B   |
| ADRA2C  | C1orf27  | ABAT    |
| DRD3    | RGS21    | SCN1A   |
| DNMT3A  | RGS1     | SCN3B   |
| PHKG2   | IER1     | SCN3A   |
| APLP1   | IR20     | SCN7A   |
| CHRNA7  | CFHR3    | SCN5A   |
| INS     | FHR3     | SCN10A  |
| SLC22A1 | HLF4     | AKR1D1  |
| CD34    | CFHL3    | ALDH5A1 |
| CALCA   | CFHR1    | SCN2A   |
| HTR4    | FHR1     | HDAC9   |
| GABRA2  | HFL1     | TYR     |
| GABRD   | CFHL1    | SCN9A   |
| GABRB1  | GUK2     | SCN4A   |
| GABRG3  | TIMM17A  | SCN4B   |
| HTR6    | TIM17A   | SRD5A2  |
| GABRE   | RAB1F    | ACADSB  |
| GABRA3  | RASGFR3  | SCN8A   |



|         |           |        |
|---------|-----------|--------|
| GABRG1  | MSS4      | SCN1B  |
| GABRP   | ZBED6     | OGDH   |
| GABRA4  | MDM4      | CXCR4  |
| GABRB2  | DSTYK     | VKORC1 |
| HTR3D   | KIAA0472  | NQ01   |
| GABRQ   | RIP5      | ATP1A1 |
| HTR3B   | DUSTYK    | TYMS   |
| GABRA5  | CAKUT1    | NT5C2  |
| HTR3E   | SPG23     | IMPDH1 |
| HTR1E   | BLACAT1   | ENPP1  |
| GABRA6  | LINC00912 | POLB   |
| HTR3A   | RASSF5    | TERT   |
| GABRA1  | NORE1     | DNMT1  |
| GABRG2  | IL10      | MTNR1A |
| SLCO2B1 | CSIF      | MTNR1B |
| HTR3C   | GVHDS     | DCT    |
| TRPV3   | IL24      | TYRP1  |
| TRPM8   | ST16      | NFKB2  |
| TRPA1   | MDA7      | TNF    |
| SCN11A  | FCAMR     | MMP9   |
| SCN2B   | YOD1      | F2     |
| ABAT    | OTUD2     | SLC6A3 |
| SCN1A   | DUBA8     | S1PR5  |
| SCN3B   | IRF6      | ADRB2  |
| SCN3A   | VWS       | MAOB   |

|         |             |          |
|---------|-------------|----------|
| SCN7A   | LPS         | ADRB1    |
| SCN5A   | PIT         | MAOA     |
| SCN10A  | PPS1        | SLC6A4   |
| AKR1D1  | OFC6        | SLC18A2  |
| ALDH5A1 | KCNH1       | ALOX5    |
| SCN2A   | EAG         | ADRB3    |
| HDAC9   | TMBTS       | CARTPT   |
| TYR     | ZLS1        | ALDH3A1  |
| SCN9A   | DTL         | RHO      |
| SCN4A   | RAMP        | RS1      |
| SCN4B   | DCAF2       | WNT4     |
| SRD5A2  | CDT2        | PTGIS    |
| ACADSB  | DEL1q41q42  | CYP11B1  |
| SCN8A   | C1DELq41q42 | CYP11B2  |
| SCN1B   | RRP15       | CACNA1H  |
| OGDH    | ENAH        | SERPINB7 |
| CXCR4   | ENA         | PLAT     |
| CRYZ    | MENA        | THBD     |
| VKORC1  | NDPP1       | PPARG    |
| NQO1    | LIN9        | FABP2    |
| ATP1A1  | ACTA1       | CFTR     |
| TYMS    | ASMA        | LPL      |
| NT5C2   | NEM3        | CETP     |
| IMPDH1  | CFTD1       | PDE10A   |
| ENPP1   | SHPM        | HSD17B1  |

|         |          |        |
|---------|----------|--------|
| POLB    | PCAP     | PROS1  |
| TERT    | COG2     | PROZ   |
| DNMT1   | LDLC     | NQO2   |
| MTNR1A  | CDG2Q    | DHODH  |
| MTNR1B  | TOMM20   | F7     |
| DCT     | MAS20    | F9     |
| TYRP1   | KIAA0016 | GGCX   |
| NFKB2   | RGS7     | F10    |
| TNF     | FH       | PROC   |
| MMP9    | HLRCC    | BGLAP  |
| F2      | MCUL1    | PTGIR  |
| GPR27   | FMRD     | PDE3A  |
| SLC6A3  | EXO1     | PDE3B  |
| S1PR5   | HEX1     | LTA    |
| ADRB2   | SDCCAG8  | ESR2   |
| MAOB    | CCCAP    | PDE5A  |
| ADRB1   | SLSN7    | PDE4A  |
| MAOA    | BBS16    | RYR1   |
| SLC6A4  | SPGF2    | ITPR1  |
| SLC18A2 | ASG      | PDE6A  |
| ALOX5   | ID2      | PRKDC  |
| ADRB3   | KLF11    | PIK3CD |
| TAAR1   | TIEG2    | PGD    |
| CARTPT  | FKLF1    | PIK3CA |
| ALDH3A1 | FKLF     | PIK3CB |

|          |           |         |
|----------|-----------|---------|
| RHO      | MODY7     | ITPR2   |
| RS1      | ODC1      | ITPR3   |
| WNT4     | GACAT3    | PDE4C   |
| PTGIS    | LINC01458 | ATM     |
| CYP11B1  | SMC6L1    | PDE2A   |
| CYP11B2  | SMC6      | PDE8B   |
| CACNA1H  | GEN1      | NT5E    |
| VKORC1L1 | ODD       | PDE6C   |
| SERPINB7 | OSR1      | PDE11A  |
| PLAT     | PUM2      | RINT1   |
| THBD     | KIAA0235  | RIPK1   |
| PPARG    | EFR3B     | PIK3R1  |
| FABP2    | KIAA0953  | TACR2   |
| CFTR     | GAREM2    | AMPD3   |
| LPL      | HADHA     | CX3CR1  |
| CETP     | MTPA      | ADA     |
| PDE10A   | KCNK3     | HAP1    |
| HSD17B1  | TASK      | IDNK    |
| PROS1    | PPH4      | RPL3    |
| PROZ     | CAD       | CACNA1C |
| NQO2     | CDG1Z     | TRDMT1  |
| DHODH    | EIEE50    | DHFR    |
| F7       | SUPT7L    | SHMT1   |
| F9       | SUPT7H    | DMTN    |
| GGCX     | SPT71     | KCNMA1  |

|        |          |         |
|--------|----------|---------|
| F10    | KIAA0764 | SCNN1A  |
| PROC   | STAF65G  | KCNJ8   |
| BGLAP  | SPDYA    | SCNN1G  |
| PTGIR  | SPY1     | MTAP    |
| PDE3A  | RINGOA   | TLR8    |
| PDE3B  | LBH      | APRT    |
| LTA    | MEMO1    | PECR    |
| ESR2   | MEMO     | HRH1    |
| PDE7B  | C2orf4   | HRH2    |
| PDE5A  | DPY30    | AOC3    |
| PDE9A  | SOCS5    | SRPK2   |
| PDE4A  | CIS6     | TLR7    |
| RYR1   | KIAA0671 | KCNJ1   |
| ITPR1  | MCFD2    | AGTR1   |
| PDE6A  | F5F8D2   | ACP1    |
| PRKDC  | EPCAM    | SCNN1B  |
| PIK3CD | ACSTD1   | CYP2B6  |
| PGD    | TROP1    | SCT     |
| PIK3CA | M4S1     | UGCG    |
| PDE1A  | MIC18    | ARRB2   |
| PIK3CB | DIAR5    | RAB7A   |
| ITPR2  | HNPCC8   | PRKAA2  |
| PDE1B  | MSH2     | ALDH3A2 |
| PDE7A  | COCA1    | ARRDC3  |
| ITPR3  | FCC1     | HPRT1   |

|         |          |        |
|---------|----------|--------|
| POLA2   | HNPCC1   | ACTN2  |
| PDE4C   | MSH6     | DDC    |
| PDE1C   | GTBP     | DGUOK  |
| ATM     | HNPCC5   | XDH    |
| PDE6B   | CHAC2    | SLC7A8 |
| PDE2A   | EFEMP1   | TH     |
| PDE8B   | FBNL     | TAT    |
| NT5E    | DHRD     | FARS2  |
| PDE6C   | EHBP1    | PAH    |
| PDE11A  | KIAA0903 | FARSB  |
| PDE8A   | HPC12    | CHRM3  |
| RINT1   | OTX1     | CHRM1  |
| RIPK1   | WDPCP    | CHRM2  |
| PIK3R1  | C2orf86  | PPARD  |
| TACR2   | BBS15    | ACSL4  |
| AMPD3   | CHDTHP   | CKMT1B |
| CX3CR1  | VPS54    | CKM    |
| ADA     | VPS54L   | SLC6A8 |
| HAP1    | WR       | CKB    |
| IDNK    | PELI1    | APOA2  |
| RPL3    | PN01     | IL1B   |
| CACNA1C | MOGS     | SLC9A1 |
| TRDMT1  | GCS1     | IL13   |
| DHFRL1  | CDG2B    | SC5D   |
| DHFR    | DOK1     | LPCAT1 |

|        |         |         |
|--------|---------|---------|
| SHMT1  | IGKV@   | COL27A1 |
| DMTN   | PARTICL | HSD11B1 |
| KCNMA1 | GGCX    | NCOA2   |
| SCNN1A | VKCFD1  | KCNH2   |
| KCNJ8  | SFTPB   | CHRNA2  |
| SCNN1G | SFTB3   | OPRM1   |
| MTAP   | SMDP1   | BAX     |
| TLR8   | ZFP103  | CASP9   |
| APRT   | KF1     | JUN     |
| PECR   | COPD    | CASP3   |
| HRH1   | CREG2   | CASP8   |
| HRH2   | C2orf40 | PON1    |
| SCNN1D | ECRG4   | NCOA1   |
| AOC3   | COMA    | GSK3B   |
| SRPK2  | EDAR    | PRSS1   |
| TLR7   | DL      | CCNA2   |
| KCNJ1  | ED3     | GRIA2   |
| AGTR1  | EDA3    | LYZ     |
| ACP1   | HRM1    | AKR1B1  |
| SCNN1B | ECTD10A | PLAU    |
| CYP2B6 | ECTD10B | LTA4H   |
| SAXO1  | BUB1    |         |
| SCT    | LCO     |         |
| UGCG   | IL1A    |         |
| ARRB2  | IL1B    |         |

|          |             |
|----------|-------------|
| RAB7A    | IL1RN       |
| PRKAA2   | MVCD4       |
| HSP90AB1 | DIRA        |
| ALDH3A2  | NIFK        |
| CALCOCO2 | MKI67IP     |
| AOC2     | NOPP34      |
| ARRDC3   | PROC        |
| HPRT1    | PC          |
| ACTN2    | THPH3       |
| DDC      | THPH4       |
| ITFG2    | CCDC115     |
| DGUOK    | CCP1        |
| XDH      | CDG20       |
| SLC7A8   | IMP4        |
| TH       | BXDC4       |
| TAT      | EPC2        |
| FARS2    | SCN9A       |
| PAH      | NENA        |
| FARSA    | PN1         |
| FARSB    | FEB3B       |
| CHRM3    | GEFSP7      |
| CHRM1    | SFNP        |
| CHRM2    | HSAN2D      |
| FFAR1    | DUP2q31. 1  |
| PPARD    | C2DUPq31. 1 |



|          |           |
|----------|-----------|
| ACSL4    | LNPK      |
| ACSL3    | KIAA1715  |
| CKMT1B   | NEDEHCC   |
| CKM      | HOXD10    |
| SLC6A8   | HOX4D     |
| CKMT2    | SCHLAP1   |
| CKMT1A   | PCAT114   |
| CKB      | LINC00913 |
| APOA2    | ITGA4     |
| IL1B     | CD49D     |
| SLC9A1   | NEUROD1   |
| IL13     | NIDDM     |
| SC5D     | DIRC1     |
| SLC16A12 | STAT1     |
| LPCAT1   | CANDF7    |
| COL27A1  | IMD31A    |
| HSD11B1  | IMD31B    |
| NCOA2    | IMD31C    |
| KCNH2    | STAT4     |
| CHRM4    | SLEB11    |
| CHRNA2   | BOLL      |
| OPRM1    | BOULE     |
| BAX      | NIF3L1    |
| CASP9    | CASP10    |
| JUN      | MCH4      |

|        |        |
|--------|--------|
| CASP3  | ALPS2  |
| CASP8  | CASP8  |
| PON1   | MCH5   |
| PKIA   | ALPS2B |
| NCOA1  | NOP58  |
| GSK3B  | NOP5   |
| PRSS1  | BMPR2  |
| CCNA2  | PPH1   |
| GRIA2  | POVD1  |
| LYZ    | TP53   |
| AKR1B1 | BRCA2  |
| PLAU   | EGFR   |
| LTA4H  | BRCA1  |
| CTRB1  | PTEN   |
|        | KRAS   |
|        | IL6    |
|        | ATM    |
|        | TNF    |
|        | ERBB2  |
|        | CDKN2A |
|        | APC    |
|        | MLH1   |
|        | CDH1   |
|        | VEGFA  |
|        | STAT3  |

BRAF  
PIK3CA  
TGFB1  
AKT1  
TERT  
CTNNB1  
CHEK2  
CCND1  
STK11  
HRAS  
SMAD4  
RB1  
MYC  
ALB  
ESR1  
CXCR4  
IFNG  
FGFR3  
MET  
FAS  
MAPK1  
EGF  
TLR4  
CDKN1A  
NOTCH1

TGFBR2

CDK4

NKX2-1

FGFR2

IGF1

ALK

KIT

MDM2

RET

CDKN1B

CCR6

MIR21

NFKB1

FGFR1

DICER1

CAV1

SRC

IGF1R

MMP1

BAX

CD40LG

MTHFR

SPP1

PIK3R1

TP63

ERCC2

FN1

CTLA4

XIAP

CXCL12

EP300

FOXP3

RAD51

PPARG

IGF2

ELANE

CFTR

VEGFC

CCL2

PDGFRA

NFE2L2

ANXA5

PDGFRB

CXCL8

PLAU

CD8A

MGMT

AXIN2

NBN

MAP2K1

FHIT

BMP4

EZH2

SMARCA4

NF1

ERCC1

H19

TNFRSF1A

MPO

PMS2

MMP9

SMAD3

FLT1

F2

ERCC6

JAK2

RARB

BCL2

BAP1

TYMS

SOX2

SLC2A1

TSC2

PALB2

INS

TERC  
ICAM1  
ERBB3  
TYMP  
TLR2  
RAC1  
DNMT3B  
DNMT1  
AR  
ESR2  
FOS  
NOS2  
RAF1  
RELA  
PTGS2  
AKT2  
IL13  
MIR17  
TOP2A  
MMP2  
MIR34A  
MIR145  
MUC1  
MIR155  
AURKA

FLT4

MIR125A

CDKN2B

PDGFB

MIR126

CD40

HLA-DRB1

GLI1

ACE

TWIST1

CREB1

VHL

JAK3

IL2RA

MIR146A

TP73

MEG3

TSC1

TNFRSF10B

SNAI2

MIR31

ELN

BMP2

CTSB

PROM1



PDCD1  
BIRC3  
ADA  
CSF3  
ZEB1  
NFKBIA  
HSPB1  
MIR142  
GJA1  
CASP3  
ERBB4  
OGG1  
TIMP3  
AKT3  
B2M  
TGFBR1  
CYP1B1  
ENG  
BRIP1  
MIR221  
MIR143  
ABCC2  
DPYD  
MIR27A  
SPARC

DLEC1  
DNMT3A  
GSTM1  
PTPRC  
MIR214  
CD274  
SETD2  
CD79A  
CDC42  
LEP  
ABCB1  
HIF1A  
SFTPC  
SERPINA1  
MIR200A  
IKBKB  
MIR223  
MIR200C  
WT1  
IL2  
GSTP1  
DDR2  
CRP  
MIR205  
CHEK1

MIR222

STAT5B

MIR182

IL4

XRCC3

GSN

GNAS

GATA2

RARA

MIR195

U2AF1

MIR141

HLA-G

IRS1

MIR200B

DOCK8

MYCN

CAT

BIRC5

MIR148A

ZEB2

HMOX1

JUN

CD44

POLE

XPA  
IRF1  
MIR150  
MIR183  
ITGA3  
MSH3  
MIR29A  
MIR483  
PGR  
HLA-B  
CYP1A1  
F5  
NOD2  
VDR  
MIRLET7A1  
CEACAM5  
MIR20A  
SERPINC1  
CCN2  
FGF2  
CSF2  
CYP2D6  
MIR193A  
MIR203A  
MIR140

PLG  
MIR210  
KRT5  
MIR22  
FGFR4  
ROS1  
PRKN  
KLF6  
VWF  
PRTN3  
MBL2  
PTPN11  
KDR  
IDH1  
HLA-A  
TNFRSF1B  
MIR144  
ERCC4  
MRE11  
ABCA3  
MIR34C  
RAD51C  
FLCN  
ITGA6  
BDNF

MIR106B

LAMC2

APOE

HLA-DQB1

MIR30E

MIRLET7B

XRCC1

MIR15A

MIR96

JUP

SMAD7

MIR18A

PIK3R2

STK4

MIR99A

KITLG

PTCH1

MAP2K2

CCL3

MIRLET7D

MIR25

MUC5B

RASSF1

IL4R

MIR335

COL1A1  
MIR204  
HMGA2  
SOS1  
TLR3  
BTK  
MKI67  
TNFSF11  
NOTCH3  
MIR181A1  
TAP1  
MIR100  
TIMP1  
KCNQ10T1  
HGF  
NLRP3  
MIR93  
NOS3  
IL7  
CDKN3  
COMT  
KRT19  
BMPR1A  
BCL2L1  
RAD50

HPGD  
MIR224  
TGFB2  
MIR199B  
MEN1  
ERCC5  
SMARCB1  
CD55  
CD19  
DDB2  
BARD1  
ACTA2  
IL17A  
SPINK1  
ENO2  
TNFSF10  
ABCC1  
MIR15B  
POMC  
CREBBP  
MIR23A  
ZMYND10  
MIR19A  
FLNA  
MIR424



TNFRSF13B

CASP9

MAPK8

MIR26A1

MIR191

MIR486-1

ATR

IKBKG

MIR451A

MIR373

PTK2

MIR146B

MIR16-1

RMRP

TFAP2A

PARP1

ALOX5

ASCL1

CCND2

SOD1

KRT14

ABCG2

UGT1A1

MAPK3

KRT7

IGFBP3  
ABL1  
PPP2R1B  
MIR128-2  
MIR106A  
NOTCH2  
PCNA  
MIR34B  
GRP  
ADIPOQ  
MIR192  
HFE  
DES  
FGF10  
NQO1  
SERPINE1  
CD28  
CD4  
CYCS  
COL18A1  
MAX  
CHRNA3  
MYD88  
TOP1  
MIRLET7G

YAP1  
IL2RB  
MALAT1  
MT-CO1  
IGF2R  
MIR185  
TGFA  
DKC1  
IL7R  
MIR107  
RAG1  
MMP7  
GPC3  
LAMB3  
SP1  
TLR5  
MIRLET7C  
HOTAIR  
SOD2  
PRSS1  
PLAUR  
E2F1  
PRKCD  
CCL11  
SOX9

ITGAM  
KRT18  
WRN  
MIRLET7E  
MIR10A  
WNT5A  
MIR296  
NFKB2  
MIR324  
LIG4  
KLK3  
STAT6  
KRT20  
NF2  
ZAP70  
PLAT  
HLA-DQA1  
MMP14  
TRIP13  
CDK2  
FBN1  
MAPK14  
RAD51D  
CDK1  
PRKDC

SERPINA3

GATA4

MUC16

CYP17A1

JAG1

HSP90AA1

CD36

FADD

MIR331

CCL5

HAVCR2

TFRC

MIR32

MIR137

ETS1

ITGB1

SFTPA1

MIR29B2

ADRB2

SHH

MCL1

TIMP2

SFTPD

RUNX2

MIRLET7I

MIR10B

EDN1

MIR30B

SNAI1

CALR

MIR133B

ACTC1

CR2

GLI3

RTEL1

MIR24-2

VIM

NGF

CYP19A1

MEFV

CHGA

MIR499A

MIR130A

TCF7L2

ITGB3

ARID1A

TLR9

WNT1

MIR342

BMP6

H2AC18

PRKAR1A

NME1

EDNRA

MECP2

MUC5AC

SYP

RHOA

CDK6

IL18

CCNB1

CTNNA1

RPSA

CCNA2

CXCR1

MIR148B

ITGA2B

ACVRL1

WWOX

POU5F1

MMP3

DLK1

FANCD2

TNFRSF11B

SFTPA2

REN  
LEPR  
SH2D1A  
YWHAE  
NPM1  
TYR  
HLA-DPB1  
MIRLET7A3  
IL5  
DCLRE1C  
GFAP  
LTA  
SMAD2  
DKK1  
PIK3CG  
BUB1B  
HMGB1  
COL4A3  
TGFB3  
BCL10  
KEAP1  
MIR30D  
THBS1  
MIR197  
GATA3



IL3  
TNFRSF13C  
NTRK2  
FOXO1  
AHR  
HNF1B  
COL2A1  
MYLK  
RPS6KB1  
MIR198  
PRKCA  
KRT8  
LMNA  
MIR378A  
SLC6A4  
IFIH1  
SMPD1  
NTRK3  
FGF8  
MIR199A1  
FOXO1  
TG  
HDAC1  
CDH2  
CYBB

IL12RB1

MIR375

LOX

POLD1

IL2RG

G6PD

HSPA4

PLK1

BSG

APEX1

GREM1

CCNE1

BAK1

BMI1

EPHB4

EDNRB

XPC

TNFRSF10A

NRG1

FGF7

ITGB2

PROS1

WAS

TTR

SLC22A18

MIR33A

LGALS3

MIR372

MIR30A

MVP

CALCA

MIR181C

HSPA5

SERPINB5

CFLAR

SOX4

AREG

PTH

MALT1

IFI27

SKP2

COL4A2

THPO

GUSB

EZR

COL1A2

NAT2

MUC4

MIR23B

CASR

BLM  
MIR9-1  
ITGB4  
SDHD  
PTHLH  
CDKN1C  
PNP  
C3  
XRCC2  
IFNA1  
AGTR1  
BCR  
CHD7  
GADD45A  
AFP  
ARAF  
DAPK1  
CD34  
RUNX3  
PVT1  
ALDH1A1  
STIM1  
PSAP  
HDAC9  
CXCL1

ICOS

F3

SST

ANGPT2

WRAP53

ICOSLG

BCL2L11

TGFBI

HYDIN

MIR29C

HPRT1

FANCC

MIF

VEGFD

HELLS

CSF1

IFNGR1

NCAM1

CXCR2

SQSTM1

EIF4E

FLT3

CD24

IL17F

CTSK

NRP1  
RAG2  
CYP3A4  
CA9  
AICDA  
INSR  
TCF3  
MIR127  
S100A4  
CD46  
MS4A1  
LCK  
EPHX1  
DSP  
CYP2E1  
CCR7  
FASN  
IGHM  
PRF1  
MT-CYB  
PECAM1  
CD81  
WNT3  
TNF2  
CR1

POSTN

FOXO3

CYP2A6

IDH2

GSTT1

CHRNA5

ETV6

TF

MAD1L1

C4A

DHFR

XRCC5

UCA1

TXN

PON1

BAD

CTSD

PSMB8

GRB2

CIITA

GBA

HABP2

F13A1

CHI3L1

RYR1

GHRL  
EPHA2  
STMN1  
GATA6  
CTAG1B  
COL3A1  
ENO1  
FANCA  
TTN  
XRCC6  
PML  
FSCN1  
CDKN2B-AS1  
SCGB1A1  
RECQL4  
E2F3  
CFH  
CYBA  
TNFRSF11A  
GDF15  
NPRL2  
KMT2D  
CYP27B1  
CASP7  
MSLN



ITGAV

EWSR1

AGT

GAS5

HLA-DPA1

PIK3C2A

MIR196A1

GAPDH

TKT

CXCL10

HBEGF

ALPL

MMP12

LGALS1

AXIN1

ACP5

BECN1

PARN

IFNA2

MMP13

CCND3

PTPN22

FBXW7

MVK

SMARCA2

RELB  
MTAP  
TUG1  
NEAT1  
SCNN1A  
PIK3CB  
DIABLO  
PTK2B  
CLEC7A  
RECK  
MIR132  
PPM1D  
MIR152  
LRP5  
CD82  
NAGLU  
GDNF  
ATP8B1  
SELE  
GHR  
CBL  
KCNQ1  
DMBT1  
FOXC2  
WNT3A

ERCC3

CTCF

AXL

STS

MECOM

SOCS3

MAGEA1

KDM6A

VCAM1

TYK2

GRN

CFI

SLC11A1

EGR1

PAX5

CCAT1

PLCG1

CEACAM7

BIRC2

ABCA1

NHEJ1

SPINK5

PXN

CTNND1

FLNB

KRT13  
IGFBP2  
FGF23  
MLH3  
AURKB  
GSK3B  
EHMT1  
ABCC3  
APP  
CD247  
NSD1  
ANGPT1  
FBLN5  
CHUK  
LIMK1  
CADM1  
DMD  
LRRC56  
CTSC  
TRPS1  
SUFU  
PIK3CD  
SCNN1B  
FCN3  
FLNC

MIR122

TET2

TBX1

KMT2A

SCNN1G

IL1R1

MAPT

NANOG

NLRP7

AVP

IL17RA

PLA2G4A

PDCD4

PSMB9

MIR149

PAK1

F8

XIST

MIR125B1

EPOR

MAGEA3

NLRC4

HP

MSN

LPL

IL21  
SETBP1  
MIR532  
CACNA1A  
PTGS1  
ARID1B  
HNF4A  
F10  
COL11A1  
PITX2  
HBB  
USB1  
RARS1  
ATRX  
APOA1  
CCAT2  
TCIRG1  
SOCS1  
PAEP  
ITGA2  
MIR139  
PDPN  
FOXP1  
MIR206  
IL15

EPO  
CXCR3  
CHRM3  
ETV4  
IL12B  
HTR2A  
MYH7  
MIR124-1  
IL6ST  
SELP  
CLU  
NAT1  
TAP2  
ABCB11  
KDM4C  
SSTR2  
E2F2  
ILK  
MME  
CDC25C  
PAX6  
NHP2  
THBD  
S100B  
SLPI

ARG1  
NCF1  
GNRH1  
DCK  
SIRT1  
IGH  
CCKBR  
FANCG  
CDC25A  
MMP11  
GRPR  
CASC2  
OFD1  
CYP3A5  
FAT4  
ROCK1  
GNAQ  
FOXE1  
ITK  
GATA1  
FLG  
LIFR  
NR3C1  
FLI1  
LAMA2



RAP1A  
LYST  
GALNS  
APOB  
CACNA1C  
LINC-ROR  
TUBB  
DNAH5  
DNAH8  
GAST  
COX5A  
MITF  
FGA  
MIR320A  
CDC6  
CEACAM3  
HLA-C  
CDX2  
NOP10  
ANXA1  
MAGEA4  
NR1H4  
CDKN2C  
SERPINB3  
MTR

CA2  
MIR193B  
REST  
RETN  
PRL  
PLCG2  
RXRA  
INPPL1  
CARD11  
LRBA  
MIR29B1  
ATP7A  
UNG  
MIR423  
HDAC4  
ROB01  
JAK1  
MYH9  
ABCB4  
HOTTIP  
MIR338  
NR3C2  
GPT  
MYH11  
MST1R

POLK  
KRT17  
KLF4  
LBR  
MSMB  
MIR181A2  
ECM1  
VCP  
CD80  
CPT2  
AIRE  
P2RX7  
COL11A2  
WNT4  
SERPINH1  
NODAL  
CCR5  
CD3D  
DNAAF2  
GJB2  
PGM3  
FOXF1  
HYAL1  
MIR101-1  
CD9

PRLR

FANCM

MCM4

KRT10

SDHC

PAX3

RPGR

ANXA2

GUCY2C

CEBPA

TFE3

IKZF1

TNNI3

HSPD1

SLC6A3

MRAP

MIR181B1

MIR24-1

ANPEP

ACTN4

HOXB13

SDHA

IL23R

TNFSF12

TRAF6

MIR497

CRKL

AP3B1

DSG1

CTC1

VIP

AFAP1-AS1

CEACAM1

STAT5A

EREG

CD70

GLB1

CD79B

CTSL

RSPH4A

SNCA

CISH

GAL

IL12A

MPL

CX3CR1

FKBP5

MIR429

BMP1

SF3B1

PSTPIP1

RECQL

PSEN2

FGF1

CSF1R

HMGA1

MAP3K8

PIK3R3

CSF3R

SAA1

GAA

DNAH11

CEACAM6

TGM1

BCL6

WIF1

KLLN

MIR196A2

EPHA3

SCN5A

ARSA

EIF2AK3

MIR30C1

HDAC2

PSG2

BGLAP

CALM1

RUNX1

MAPK10

CSF2RA

DNAI2

PSAT1

GZMB

MTA1

RNASE3

NPPB

FMR1

SEMA3A

GLA

WDR19

BCOR

PGF

CALB2

MIR376A1

UCHL1

NR5A1

SPRY4-IT1

PRKCB

SNHG1

TUSC3

PTGER4

TK1

ENPP2

DNAAF4

CCDC39

CCL17

TSHR

HCRT

CCNO

RYR2

IDUA

ELAC2

RRM2

FANCF

RIPK1

ITGA5

CDC73

CDCA7

CD2AP

AKR1B10

RAC2

RSPH9

RASA1

ADH1C

PKD1



C4B  
SMARCE1  
CXCL5  
RAB27A  
PMS1  
H2AX  
NKX2-5  
MMP10  
TCF4  
CD86  
HOXA11-AS  
MED12  
LCN2  
PEPD  
PCAT1  
SYK  
ZFAS1  
SHBG  
DNAAF5  
DDR1  
NLRP1  
CCBE1  
EIF4EBP1  
SOX2-OT  
MIR186

PTH1R

MIR574

LDLR

S100A9

ROR2

CXCL9

ABRAXAS1

CDH13

CLDN7

ADA2

DVL1

MGP

ASAH1

RSPH1

S100A8

G6PC3

EGFR-AS1

TEK

DLL4

FOXC1

DHCR7

TRIM28

CYP1A2

ACTB

CYP21A2

IRS2  
PAX2  
TRAF3  
SNHG16  
ASXL1  
FOLR1  
TBX5  
PDGFA  
SLC19A1  
AGER  
HERC2  
ATP11A  
NCF4  
PLP1  
F2R  
NSD2  
TCF7  
NLRP12  
CCDC114  
EFEMP2  
EPAS1  
NEU1  
DNAH1  
ADAM12  
APRT

PKM  
ATP7B  
SBDS  
APOH  
HNRNPA2B1  
YBX1  
MIR328  
CCDC40  
TCOF1  
SOX10  
GAS8  
SLC26A2  
SEMA3B  
EML4  
YY1  
IRF5  
ZIC3  
CARD9  
VTN  
LTBP4  
STING1  
DNAAF1  
MIR184  
RIOX2  
TIMELESS

NROB1  
DNAI1  
SPAG1  
MTDH  
SLC29A1  
F9  
MYOD1  
TGM2  
DANCR  
SELL  
GMNN  
NME8  
FIP1L1  
NAB2  
ADAM17  
SLC52A3  
MIR361  
PANDAR  
IL10RA  
MIR377  
ERG  
CCR1  
NUP214  
MIR138-1  
HDGF

CCL4

ATF6

CBFB

MTUS1

MBTPS2

TNNT2

MAP3K7

ARMC4

KAT6B

PTPN3

NR1H2

NEK9

STN1

TRAF2

BCAR4

IGHE

MIR133A1

PRDM16

TNFRSF8

FANCB

LAT

SMC1A

ADH1B

CD3E

RFX5

CHAT

NPPA

SSX2

CIB1

LUCAT1

RFXANK

HTR1A

MAGEC2

SEZ6L2

SERPINF1

KCNH2

BANCR

MT-CO2

SYNE1

IL11

APAF1

CFAP298

DNAAF3

CDCP1

POT1

LAMA5

EIF2AK2

ALDH2

LAMC1

TP53BP1

MIR130B

MT-ND1

DNASE1

EPB41L3

CFB

MIR542

MB

CTTN

PLOD1

MIR339

RFXAP

TNFAIP3

ADAMTS13

CCDC103

MC2R

MC1R

CASP1

TLR1

IGLL1

RASGRP1

BLNK

MSR1

GGT1

IGFBP5

MIR27B



PRODH

DBH

PRKD1

HPS6

IL9

TAC1

RRM1

IFNB1

MIR125B2

SRD5A2

NPC1

MARS1

MUC7

TRPV4

MASP2

IREB2

SAT1

TP53COR1

LPIN1

TH

SRP54

MIR503

MIR128-1

CASP2

MIR330

FUS  
CC2D2A  
HAGLR  
SLC25A13  
HAX1  
STX1A  
MYCL  
GNPTAB  
BIRC7  
FOXJ1  
LRRC6  
GLI2  
F7  
RPL11  
GADD45G  
NES  
RBP4  
CDA  
PRKACA  
SOX11  
RPL5  
PIP  
HTRA1  
MUC6  
F2RL3

MIR151A

LHCGR

SHC1

FAM13A

KRT1

TRAF1

TUSC7

PHB

PSEN1

C1S

ASS1

DRC1

GDF2

RPS6KA3

C5

MUSK

CCL22

HPS1

STAR

CORO1A

MIR103A1

CXCL2

MMP8

CCDC65

IL21R

ACVR1  
IL33  
CBS  
DLC1  
ELAVL1  
FUCA1  
IGFBP1  
HMGCR  
BRD4  
NPC2  
COL5A2  
DUOX2  
CCL18  
SLC34A2  
HYAL2  
LIF  
CRELD1  
CCR3  
CCK  
DNAL1  
CD14  
ALDOA  
NCR1  
ACAN  
DYNC2H1

GALNT3

FZD4

HNF1A-AS1

DLL3

CLN3

CLCN5

SMN1

PLCB1

ATG7

CP

MIR455

ELAVL4

NCOA3

CEP290

LZTR1

SGSH

BAG1

BCYRN1

OCRL

ARSB

MIR708

SELENON

EIF2AK4

HPSE

LTF

PSMB4  
SNHG12  
SNHG15  
CFC1  
IFT140  
TBX4  
MIR340  
LNCRNA-ATB  
CCN1  
WNT7B  
PRKCI  
INVS  
MIR212  
KIAA0586  
SEMA3F  
ADM  
MAP2K4  
ANTXR2  
DSC3  
CLDN4  
CCDC151  
PF4  
UMPS  
NCOR1  
TINCR

TLR7  
FANCE  
TMEM67  
ATP6VOA2  
GTF2H5  
CCNB3  
IGF2-AS  
LEF1  
AMACR  
BTNL2  
STRA6  
BGN  
AIMP2  
PRPS1  
NIPBL  
TXNRD2  
CTSG  
LAMA4  
GADD45B  
KL  
CYTOR  
FOLH1  
ETV1  
KCNJ11  
ALPP

BACH2

TREX1

TBL1XR1

DNASE1L3

ISL1

GPX1

DUSP1

NSMCE3

ECT2

IL17RC

NRXN1

MPZ

DRD4

LINC00261

RAD21

SSX1

INPP5E

GHET1

TNFSF13B

TLR6

CHKA

MYH6

PMM2

GPC4

DDIT3



SLC46A1

MT-CO3

MIR216A

KDM1A

RBPJ

SNHG20

NEK8

MCIDAS

AHI1

MIR625

MSX1

MIR28

AGK

SLC22A4

CACNA1B

LDHA

DUSP6

DCC

PLA2G7

CDH3

TBC1D24

TAPBP

BTD

AK2

SNRPN

TGIF1  
ANK2  
SERPINB2  
EDN3  
SLC2A10  
LGI1  
WFS1  
S100A2  
RPS19  
LRP2  
TARDBP  
DNAJB13  
FGF9  
BMP7  
TIRAP  
HSPA8  
GH1  
HGSNAT  
NTS  
PYGM  
LPP  
HNF1A  
MIR345  
BBS4  
IFT88

TPMT

JAGN1

MKS1

NKILA

TRPC6

TTC25

DNAJC21

KIF1B

RPGRIP1L

MIR154

CCNE2

BBS2

FOXA1

IRAK1

BCL11B

CLCN2

IRAK4

MKKS

GP1BA

BBS1

RSPH3

CCR4

NAGS

PDPK1

ARSH

NPY  
SLC37A4  
TFF1  
NDRG1  
LOXL2  
WIPF1  
SAG  
CDH5  
DNAAF6  
IDO1  
CPS1  
RAD52  
TBK1  
UBE3A  
SS18  
TP73-AS1  
ITGAL  
IFT80  
STK36  
DCN  
SPAG9  
WDR34  
ADRB3  
SDC1  
CARMIL2

HSPB8

NPHS1

IGFBP7

TYRP1

CDH11

ABCC11

CCNG1

SOD3

TSG101

MIR219A1

TMPO

RHO

GAS2L2

MPLKIP

PHGDH

GALC

SULT1A1

OTC

EXT2

TOR1A

NCOR2

MIRLET7F1

NEK1

TRPV6

NR2F2

CST3  
CEP57  
HADHB  
NGFR  
GSR  
SH3KBP1  
ATN1  
INHA  
INHBA  
MCM2  
FOSL1  
COL4A1  
SFRP1  
IL16  
MINPP1  
KNG1  
UHRF1  
CCN4  
SH2B3  
CD69  
KCNJ5  
TCIM  
CFAP300  
PKD2  
FOXD2-AS1

TTC21B  
DUS2  
RORC  
FKRP  
RELN  
ALDH7A1  
PRKG1  
CD27  
LAMP2  
FOXG1  
CHRNA1  
DGCR5  
TRAF3IP2  
TMEM216  
ABCC8  
FANCL  
TECPR2  
KLRK1  
DNAH9  
HPS4  
GHRH  
MIR4435-2HG  
PCGF2  
CA4  
DPP4

ELP1  
DYNC2LI1  
UNC13D  
AVPR2  
STX11  
TLR8  
CREB3L1  
CCL20  
NMB  
NPHP3  
IFNGR2  
PPARA  
F2RL1  
BPIFA1  
FANCI  
CPOX  
PADI4  
NOVA1  
CYP27A1  
CLPTM1L  
SLC17A5  
ERF  
TMPRSS2  
SLC34A3  
HAMP



MIR95

EVC2

DRD2

FGF3

TK2

CD209

TNC

CLCA4

MAPK9

HOXD13

MIR22HG

POU2AF1

GLE1

NAPSA

KRT16

CASC9

CACNA2D2

NOTCH4

ZNRD1ASP

MLANA

FAN1

RNF43

IGF2BP3

USP9X

NPHP1

RHOB

MT-ND4

TRPV3

C1R

STXBP2

CRH

GPRC5A

PHOX2B

LAMA3

XRCC4

ING1

MAP3K1

SKIV2L

KCNJ2

PMP22

CYP2C19

PRDM10

LYVE1

COTL1

CD59

MIR502

CASC8

PTPA

RPS14

CHRNA

MIR495

EXT1

C2

FEZF1-AS1

CAMP

ARID2

ACVR2B

PDGFRL

MIR346

IRF4

ABCG5

KIF15

TPM2

FGF4

EPG5

NCOA1

HBA2

SLC4A1

CYP24A1

KHDC3L

NAMPT

RNY1

RNY3

PRKCQ

TLR10

SIX1  
KIR3DL1  
RAB7A  
XDH  
EVC  
BCL11A  
HULC  
GNS  
IRF2BP2  
SLC7A7  
COL17A1  
PIGA  
NECTIN1  
CDC45  
WNT2B  
DCTN4  
LINC00460  
CYP11B2  
MUC2  
GJB6  
BRDT  
HSPA1A  
PLOD2  
DSC2  
S100A6

SLC34A1  
PAH  
CHRND  
PRDX1  
PEBP1  
CD68  
TNXB  
SERPINB1  
AP3D1  
TRIP11  
SP110  
PTX3  
HSP90B1  
KRT3  
DKK3  
NOX4  
SLX4  
RXRG  
RNU4ATAC  
XBP1  
VEGFB  
IBSP  
IRAIN  
ZEB2-AS1  
LINC01133

LRP6  
OPRM1  
DEFB4A  
WDR35  
HPS3  
SEPTIN9  
MYH10  
ENPP1  
FECH  
GCH1  
FBP1  
DRD3  
BNIP3  
HPS5  
DNAJC5  
MIR124-3  
ATP2C1  
SMAD1  
AGRN  
ACKR1  
AKAP9  
CLDN3  
MIR135A1  
HOPX  
SLC40A1

TNFRSF6B

PIM1

PPIEL

CYP2C9

CGA

COL5A1

MMP21

IFT172

MAP2K7

ALDH18A1

DROSHA

MIRLET7A2

SLC6A2

MYBPC3

NPHP4

MTHFD1

CD38

ZFHX3

ST14

FARSB

ERAP1

PSMD12

PTPRG

ACTG2

CLDN1

ADCY10

ITGAX

PRKAG2

TMEM127

TCTN2

KCNA1

OCA2

SMC3

CRNDE

RPS27A

PI3

FEN1

RACK1

SCN1B

TRIP4

CSK

LYN

ID1

LACTB

MAP3K20

PRSS2

RHOC

LCAT

CHIT1

L1CAM



EPHX2

MYH3

IL18R1

RPS27

DSG2

TBX20

WWTR1

MIR26B

C11orf95

WASHC5

BLK

COL13A1

RPL15

ARF1

HMBS

FAM83H-AS1

KIF7

TBX6

KCNE1

HDAC6

S100A1

TPO

SLC16A1

PRAL

NUMA1

SGK1  
PRDM2  
AIP  
CRTAP  
RAD51B  
GJA5  
EYA1  
PSCA  
IL22  
THY1  
PKHD1  
C5AR1  
TAZ  
KLK6  
HBA1  
LINC00858  
COL4A5  
ADSL  
LOXL1  
SELENBP1  
TCTN3  
PDE4A  
S100A7  
TACR1  
NQO2

ESRRA  
MT-ATP6  
ATF1  
ZFPM2  
CGB3  
RCVRN  
MIR494  
EPRS1  
PDCD10  
KISS1  
XK  
SLC12A3  
HNMT  
UROD  
KIF5B  
PTPN13  
CAV3  
PSENEN  
ALOX12  
TSLP  
G6PC  
TTC7A  
TERF2  
ATF3  
DISC1

FUZ  
IFT122  
THR3  
DAB2  
AQP1  
CD5  
TFAP2B  
C1QA  
EGR2  
LRRC8A  
PSMA6  
PTGES  
IL13RA2  
ADNP  
CCL26  
CFAP53  
SRF  
PCBP2-OT1  
ALG9  
PCNT  
SDR9C7  
PTENP1  
POLG  
PRNP  
CHST14

PRKAA1

HNRNPA1

SAMD9

LIPC

FZD7

COL4A4

MAD2L2

ATXN2

SRGAP1

MID1

MICA

OAS1

GM2A

ALMS1

GPB1

HMMR

TDGF1

ISG15

HJV

MIR452

PDE5A

GGPS1

CYSLTR2

TP53TG1

TFF3

IL1RAPL2

PTS

DCTN1

COL7A1

KRIT1

SOX3

EBAG9

SRA1

PKD1L1

CPS1-IT1

SBF2-AS1

ORAI1

AGGF1

FZD6

NCOA2

LGALS3BP

SMN2

GP1BB

NHLRC2

PPBP

RALBP1

PAX8

ZNF341

MAGT1

EEF1A1

SLC26A4

UBE2T

PMEL

IL36RN

IDS

PRKCE

SC02

MXI1

HEXA

TPP1

NOS1

HIF1A-AS1

SRY

RAN

GPNMB

ASPM

EDA

CD163

MBP

PAX7

TAF15

PBRM1

NEDD4L

NOG

HIC1

IGHMBP2

SLC22A5

PAFAH1B1

RRAS2

PTTG1

PLEC

PKP1

NEB

TFPI2

SMARCAL1

TERF1

MESP2

SPTAN1

BSCL2

MIR376C

SLC25A22

TNFSF4

HIRA

AKR1C1

HBG2

CFP

PANK2

HRH2

CUX1

MDK



MACC1  
FUT4  
WDR45  
GORAB  
MAGEL2  
DGCR8  
RPS6  
SLC18A3  
SAMD9L  
CLOCK  
CD3G  
F12  
DTNBP1  
DEFB1  
RB1CC1  
SLC25A1  
CALCR  
APOD  
FKBP10  
PRSS8  
ACP1  
BID  
UBC  
TBP  
TJP1

PTGER2

CGB5

FERMT1

GTF2IRD1

RASA2

ADORA1

LMO1

CDC25B

ZMPSTE24

IFT52

HOXB9

MIR374A

ARVCF

GNAS-AS1

NCSTN

MTRR

PIEZO1

OXT

ERCC8

GJC2

DLGAP2

LINC00472

PIGN

HSD11B2

USP7

KCNE2  
ADAMTS2  
PER2  
SLC2A4  
MIR409  
SLC39A14  
PRKAA2  
TRAF4  
GTF2I  
CARTPT  
PSMD4  
RBP3  
KRT12  
SLC7A5  
MDC1  
FURIN  
MIR326  
AMFR  
SCARB2  
PRDM5  
MIR129-1  
CCNH  
MIR16-2  
MIR17HG  
GPC6

NAA10  
FREM2  
AQP2  
ADAR  
ALOX5AP  
ACADVL  
MCAM  
BAZ1B  
SCGB3A2  
CYSLTR1  
GARS1  
HTR3A  
RAPSN  
PORCN  
P4HB  
GRHL2  
GNB3  
LORICRIN  
TPX2  
RREB1  
IL1RL1  
TPM1  
C9orf72  
FST  
BCAR1

TARS1  
SULF1  
LASP1  
LRP1  
SYT2  
LINC00210  
CLCA1  
ARL3  
CXCR5  
MAOA  
SLC9A3R1  
GAS5-AS1  
ATG5  
BPI  
C14orf132  
HLCS  
NPTN-IT1  
AQP4  
AQP3  
GSTM3  
ASNS  
CSNK2A1  
WNT2  
FIG4  
SCT

RSP02

A2ML1

CCR2

LPIN2

SP7

VAV3

GNRHR

LZTS1

OTX2

MCC

DOK7

ATF4

HSD11B1

ALDH1A3

AHRR

BMX

ESS2

NOX1

HLA-DRA

CCM2

GATA5

CAV2

CXADR

BUB3

RMI2

TBCE

DCX

ATXN3

FHL1

TCN2

TRAF3IP1

ALOX15

EPHA7

CASK

FYN

DVL3

CUL1

MT-TL1

HES7

MLXIPL

ARX

GPX2

KLK4

HNRNPK

HTATIP2

DMTF1

GOPC

PROCR

MAT1A

ATP1A1

MED13L

PTPN1

AQP5

TOP3A

CFAP43

PIN1

CEBPE

PSMB5

IGFBP4

M6PR

NAIP

MUC3A

PABPN1

PLEK

CLCN1

SREBF1

ABCC6

RPS26

CEBPB

TACC1

NSUN2

PCDH19

RPL35A

MIR485

OSM



EPX  
KAT5  
RIN2  
TNFRSF10C  
DNAH7  
PROP1  
RALA  
CEP120  
IL23A  
MNX1  
TBX21  
FGF19  
ENSG00000266919  
TNFSF13  
ELP4  
CTBP1  
NEFL  
CCL21  
ATP2A2  
CD99  
RBBP8  
NID1  
TRPV1  
CD74  
DGUOK

KLF5

PSMA7

ACHE

POLA1

PIEZ02

RBP1

JMJD1C

SPTLC1

NIPAL4

SLC29A3

RPGRIP1

CITED2

COMP

REV3L

MYB

HOXA5

MIR92A1

GRB7

SMO

ARFGEF2

MYO5A

LRP1B

MYL2

MFN2

UFD1

WNT11  
P3H1  
IRF8  
CYLD  
DRAIC  
CYP11A1  
TBCD  
GALNT12  
DRD5  
ITCH  
AGR2  
POLR3A  
RPS24  
WFDC2  
IFT27  
LOC110806263  
HSD17B1  
MIR196B  
PUF60  
LIG1  
CLPB  
AGTR2  
VIPR1  
MAP1B  
CCL7

IRF3  
AHCY  
FOXN1  
SSTR5  
LIPA  
PES1  
CD63  
TP53BP2  
SIN3A  
PMAIP1  
EYA4  
MIR491  
TIA1  
ASL  
CSF2RB  
CDKL5  
ITGA7  
TMEFF2  
SUMF1  
PROKR2  
RNF168  
MOG  
ACP3  
FOXP2  
SLC12A6

B9D1  
MPV17  
CTRC  
APOL1  
SOST  
PYCR1  
SLIT2  
PYCARD  
BRMS1  
SYNGAP1  
VCL  
GAB1  
GC  
DHDH  
NORAD  
CNR1  
CDC20  
CRYAB  
BCL3  
ADAMTSL1  
HSPB2  
RANBP2  
DLL1  
GLIS3  
ETFDH

RRAS

MIR135B

GCM2

CHKB

ALCAM

MIR218-2

PRMT1

CNC2

SCN10A

CYB5R3

SCN1A

MYOG

C8B

ANKH

MIR218-1

CHRNA7

C2CD3

PRPF8

LAMP1

IL13RA1

TRIM21

IHH

CLCNKB

CDK7

CD1A

SPRY2

LETM1

CXCL13

HK2

IBA57

MT-ND2

CKB

CRYAA

CCL27

FSHR

SETD1A

UBE2L3

CFAP410

CALD1

URI1

PKP2

NFIX

H4-16

WDR60

MIR9-3

AMBP

SLC35C1

SOX30

KIAA0319L

IFT43

NR4A3

TREM1

SCN4A

LMO2

HTR1B

MIR134

DSG4

ANO1

AKR1C3

SCN11A

RPS15

STC1

PCAT29

SPDEF

LAMB1

GAD1

AKAP13

PDE4D

B9D2

ITGA11

FABP4

GCK

FXN

MELK

FABP3



GCG  
SPG7  
SHOC2  
PDGFD  
WNT10B  
MORC2  
WASF2  
H3-3A  
ASCC1  
GNB1  
RPA1  
RPS17  
PRRT2  
OAT  
ACD  
GDF1  
ASIC5  
FCER2  
MEGF10  
MACROH2A1  
SSTR1  
THBS4  
LTBP3  
AGO2  
WARS1

HESX1  
PLCE1  
TIAM1  
S100P  
FRAS1  
DAXX  
HLTF  
UVSSA  
DPH1  
PTPRO  
DDX41  
CANX  
RNF113A  
REL  
ADAMTS3  
ZEB1-AS1  
AFAP1  
ETV5  
RDH12  
MC4R  
CMA1  
PLA2G6  
TFR2  
ELK1  
EEF1A2

ACTG1  
MT-ND5  
SNCG  
NELFA  
ATP6AP1  
COL6A3  
GTF2E2  
CKS1B  
PRKCZ  
EPHA4  
EMSY  
NUS1  
DAB2IP  
GCLC  
SCN4B  
GJB1  
PARK7  
GOT2  
ADAM33  
FBN2  
SNHG5  
ID4  
RAD23B  
SPHK1  
AMH

ECHS1

NR4A2

LPA

LAMB2

SNAP25

SLC7A11

RHEB

CD244

BBS7

CSTB

PDCD1LG2

BLOC1S1

SERPINF2

SLC3A1

SMAD9

KLK10

PPIB

LIG3

SPINT2

RPS29

LRIG2

VDAC1

SREBF2

PIGR

CDK8

TUSC1  
MAPK7  
PPIG  
ADORA3  
GHSR  
NDN  
SLC39A1  
NR1I2  
EOMES  
CCR8  
COQ2  
H3C1  
MAP2K5  
GABRD  
FOXH1  
LIN28B  
LY6K  
TTC37  
KIF1A  
TPH1  
PRDM1  
USP8  
SCGB2A2  
LCOR  
NNT-AS1

KARS1  
CX3CL1  
TFG  
NFIB  
PRAME  
TPM4  
SLCO2A1  
SPI1  
PSMA4  
TNPO3  
VAV1  
ALX4  
CD2  
IQGAP1  
BMPR1B  
DHCR24  
CTAG2  
CLCN7  
TUBB3  
PAWR  
SDHAF2  
LSP1  
TNS4  
ECE1  
DYNC1H1

ATP12A

TMPRSS6

TBX2

CALM3

CDH17

PODXL

IFT74

ATP4A

RPS6KB2

IKBKE

CLCA2

ANKRD26

CDH23

MIR582

UGCG

TRB

SMARCC2

DPP9

SMARCD2

PPP2R1A

LUC7L2

SPN

DARS2

HDC

TRDN

CSNK1D

ADCYAP1

IFITM5

ZBTB24

HSD3B1

AGL

DSG3

TNFRSF4

F11

TACC3

RPL26

HSPA9

APOBEC3B

CYP11B1

ANOS1

CIP2A

RAB39B

SFN

VPS33A

CD52

CASQ2

APTX

MICB

LFNG

CRHR1



GAS1  
SRD5A1  
HJURP  
CPB2  
TRPM8  
IGES  
ACE2  
FTL  
WASF3  
BBS9  
SUZ12  
KAT2B  
IL12RB2  
MTM1  
BIN1  
RHD  
CSPP1  
CYBC1  
FTO  
HLA-E  
MACF1  
ISCA2  
TCF7L1  
CCL1  
GPX3

SKI  
BBS10  
RP2  
GRIP1  
JAG2  
EPHB6  
CYP2B6  
PAPPA  
PRDX3  
RNF213  
GP9  
HOXA10  
DNTT  
RPS10  
EFTUD2  
B3GAT1  
NOP2  
FGB  
RBM10  
DGCR2  
POLB  
POLH  
KDM5B  
LTBP2  
BHLHE40

CD7  
ABCC4  
BLOC1S6  
SH3TC2  
LBP  
CCNB2  
SALL4  
CETP  
MIR449A  
GRIN2B  
CTH  
IRF7  
DHRS9  
ATP6V1B1  
PTGER3  
MX1  
POMGNT1  
PTN  
MYOCD  
BLOC1S3  
CEP55  
PTGIS  
VCAN  
UIMC1  
PCSK9

NTF3  
GFI1B  
CLIP2  
KCNB1  
LGALS4  
AMPH  
TIMP4  
HRG  
C1QB  
ANKRD1  
TNS1  
ADORA2B  
MT-ND6  
SNAP29  
TIE1  
ADCY5  
GNA11  
FES  
HSD3B2  
NOD1  
COLQ  
MCM7  
HES1  
PRMT7  
CD22

FBLN1  
DUOX1  
SLC2A2  
MIR590  
UBB  
AKR1B1  
MRAS  
CAVIN1  
COL6A1  
RXRB  
TNK2  
ADORA2A  
RAD54B  
SERPINE2  
NDUFA13  
NAGA  
LOC111589215  
DGCR6  
STARD13  
AGA  
ABCA12  
WT1-AS  
PTPRJ  
UNC119  
HOXA9

TAF1  
PLAG1  
MIR136  
ASAP1-IT1  
CORIN  
MAD2L1  
EIF4G1  
EIF3H  
LEPQTL1  
FZR1  
ESM1  
IQCB1  
DDX58  
TNFRSF10D  
PEG10  
MFAP5  
FKTN  
PVALB  
SPATA16  
TOLLIP  
ADGRV1  
ATP6V1E1  
DDX3X  
TNXA  
DPY19L2

PELP1  
ZBTB16  
SLC31A1  
SEMA4A  
IGKC  
IFI16  
PSMC4  
RPL10  
ANXA7  
PROX1  
RAD17  
HEXB  
LPO  
SCN2A  
COX10  
ACKR3  
ADAM9  
LEFTY2  
GRM1  
TBX3  
RLIM  
CCL13  
ATAD1  
MCPH1  
KIAA0753

AGAP2-AS1

CPA1

TXNRD1

TGFBR3

DHH

H3-2

BBC3

RBCK1

HOXA-AS2

SULT2B1

PROK2

BCS1L

LIPN

MAGED2

KLK14

SLC12A1

RPS3A

ZNF469

GPR101

PDX1

PWAR1

UPK3A

FERMT3

HRH1

S100A12



RYBP  
CACNA1S  
SLC22A3  
TBXA2R  
SIGLEC5  
BICC1  
TRAIP  
ANTXR1  
PRG2  
HAVCR1  
SOX18  
ABCG8  
FMO3  
ITGA9  
REG3A  
FLT3LG  
FCN2  
CTNND2  
MT-RNR1  
ADRB1  
ATAD2  
ARHGEF1  
TFPI  
DRD1  
RHOD

VPS45  
TCTEX1D2  
CCL19  
KCNMA1  
STUB1  
ALOX15B  
CARS1  
SIX3  
NT5E  
TMEM43  
ARL2BP  
DDX1  
MST1  
PPARD  
SIK1  
APPL1  
MIR1-2  
MT-ND3  
DSE  
MIR370  
TCF21  
KLK2  
SNHG6  
CYP7A1  
LMNB2

EMP2  
UGT1A6  
PMPCA  
COL10A1  
LYPD3  
LY96  
SRSF2  
PTPRT  
KCNJ1  
MYRF  
MYO9A  
CASC15  
STEAP3  
RBX1  
CABIN1  
ADAMTS9-AS2  
POGZ  
MIR381  
CCDC26  
FUT2  
P3H2  
PYY  
STAG2  
TUBA4B  
WNT7A

SELPLG

DCT

NFATC1

CSN1S1

PTGDR2

PPL

TACR2

PWRN1

GAD2

PHEX

IL27

CTCFL

LGR5

ALDH1A2

SIL1

MIR454

ETS2

BBS5

PTPN12

BCHE

CLN8

MKRN3

TSP0

ANXA3

SULF2

HARS1  
TUBA1A  
TPD52  
HPN  
UBAC2  
ADAM8  
CLDN5  
PRNCR1  
PLS3  
SGO1  
PVR  
HYLS1  
WEE1  
GUCA2A  
DDB1  
FKBP14  
TNFRSF18  
FOXA2  
PAXIP1  
ATP1B1  
IFRD1  
CNBP  
NRP2  
ARSG  
CD83

KCNA5  
HOXA13  
CHGB  
ERN1  
MBD4  
SEC24C  
ALAS2  
GPI  
DZIP1L  
KCNQ2  
SETX  
TCF12  
SAA4  
UBE2D1  
PSMD2  
CDK12  
IL32  
SERPING1  
AIFM1  
VANGL1  
NPPC  
SON  
SPRY4  
PLAGL1  
RAB5A

ORC6  
SYCP3  
DPM1  
SH3PXD2A  
PRDX5  
MT-TK  
CTSF  
CERK  
CBR3-AS1  
ARHGAP31  
HEPACAM  
GLUL  
FA2H  
CDR2  
ROR1  
ELF3  
RBM8A  
MSX2  
TMC8  
ATP1A3  
CTRL  
MAN1B1  
PRDM6  
CYP26A1  
SEMA3C

PSMA3

P2RY12

DEK

LAPTM4B

IL31

IVD

LINC00941

NBR1

COG4

PPP1R1B

ITGAE

C1QC

MAG

GSTA1

NTN1

CD1D

TFEB

IKZF3

IL15RA

PGK1

TRIM24

SERPINA6

XPO5

SPOP

CCNA1



AKT1S1  
NCL  
HEY1  
LTA4H  
KLRC4  
VPS13A  
APOC3  
MIR675  
TSPY1  
NPRL3  
FCGRT  
TMEM38B  
COPS5  
LMOD3  
FGF18  
TACSTD2  
RAB25  
CAPN2  
SLAMF1  
SPINT1  
TPSAB1  
CAPN3  
CANDF1  
EMX2  
CES1

PKP4

VRK1

PTPN6

CGB7

KCNJ8

PHLDA2

NACC1

PPP1R13L

BDKRB2

SOX17

GP6

GRIN2A

EFNA1

TMEM231

KCNJ6

SAMHD1

PLCB4

YWHAZ

REV1

HSD17B10

RHCE

LINC00857

CD276

CCL24

RUVBL2

APOA5  
CD33  
DLST  
ARNTL  
ATF2  
P2RY2  
FZD2  
IVL  
ELMOD2  
RARG  
MIR608  
ATP2B3  
IRAK3  
CLTCL1  
TNFRSF25  
PER1  
MIR99B  
VPS13B  
SLC3A2  
PPIA  
MAP2  
DERL1  
SLC22A2  
BICD2  
MATR3

IFITM1  
SLC1A3  
SETDB1  
GNLY  
MUS81  
RRM2B  
NNT  
CPE  
MARCKS  
SPEF2  
ASXL3  
CHRNA4  
PRDX6  
HHT4  
EYS  
KMT2C  
MLF1  
UBE2C  
CHST6  
NALCN  
PIGL  
TNNT1  
STAT2  
MAML2  
H4C1

CERNA2

TACR3

CHIA

HPR

EGLN1

SLC35A2

TBXT

STC2

NR1H3

VAMP1

ZIC2

ARL13B

MIR337

HLA-DQA2

MEPE

MYH8

SLC5A7

KRT4

RICTOR

DAG1

DDHD2

NEK2

TUBG1

AIM2

CPLANE1

PLA2G10

TECRL

LRP8

MATK

TNFRSF17

SGCA

NKX3-1

GSDMB

SGCD

SATB2

SUSD2

RAB23

NUP107

DUXAP9

SULT1A3

CFAP221

NHLRC1

RFC2

INTU

SPHK2

TUBB1

PERP

FER1L4

INTS6

JUNB

KIF3A  
HLA-DRB5  
PTPRH  
ALAD  
CLSPN  
MAGEA6  
LLGL1  
MCM6  
INSM1  
STEAP4  
KLK7  
MIR663A  
APOBEC3G  
GHRHR  
TCHP  
DUSP3  
TPT1  
DNM2  
DNM1L  
CFHR2  
POR  
UPK2  
FNIP1  
COL6A2  
GABRA1

TOPBP1  
NR4A1  
CDH10  
SMOC1  
BPTF  
PDGFC  
NDE1  
CANDN1  
MNX1-AS1  
SH3BP2  
TEF  
RHBDF2  
PRDX2  
DMPK  
EVPL  
SCGB3A1  
DDX39B  
MDH2  
ALOXE3  
CSN2  
DLG1  
RPA2  
TNFSF15  
MIR490  
ADAMTSL2



ALYREF  
E2F4  
KLF17  
LOC111099027  
LOC111099028  
ACVR2A  
RUNX1T1  
AGPAT2  
PGAP3  
CLDN18  
GLDC  
DUX4  
PTER  
IL12A-AS1  
HSPH1  
AHSG  
ALDH3A2  
MAN2B1  
NTHL1  
SULT1E1  
KIF11  
SET  
LINC00473  
INF2  
SLC11A2

IER3IP1

CCDC6

EMD

CXCR6

CCN6

MIR363

GL01

GLUD1

PIGV

SUCLA2

HECTD4

POLL

ORMDL3

REG4

KLF2

HYOU1

CILD4

CILD8

AP1S2

CA1

CHN1

HOXA1

PON2

MIA2

SETD5

KISS1R

MCM5

HTT

COX14

IAPP

SCG2

RARRES1

KLHL7

POLI

PEX10

MYL3

DCLK1

PSMA1

BANF1

IFNL3

HDAC5

TPI1

CACNA1H

NFATC2

DIS3L2

CD58

GREB1

ETHE1

MS4A2

SCGB1D1

PEX1  
NKX2-6  
CLEC16A  
USH2A  
MIR187  
CBY1  
ACCS  
SRPX2  
FTH1  
SLC35A1  
ADIPOR1  
CD207  
SRSF1  
CHRM2  
EHMT2  
ACADS  
CASP6  
ABCC12  
ACTA2-AS1  
SRSF6  
TCL1A  
RNF6  
VTCN1  
AGXT  
LITAF

DDC  
TBR1  
GABRG2  
THRA  
MIR202  
SLC25A4  
DHPS  
ABCF2  
PHC3  
UMOD  
SLC01B3  
SLC01B1  
HPSE2  
CHM  
ABCB7  
MANBA  
PTP4A1  
SASH1  
CACNA1G  
EDARADD  
SNX10  
PRICKLE4  
KLK5  
LPCAT1  
NUP88

RSF1  
ARHGAP24  
DPM2  
GPSM2  
PSMD14  
CNP  
ATP5F1A  
CARD8  
DSPP  
SLC1A2  
WNK1  
NEDD9  
TRH  
ARID4B  
SLC9A3  
CAMTA1  
ADGRG6  
CACNA1D  
RAB11B  
NGLY1  
CDK9  
BEX2  
HADH  
FDPS  
LRRK2

MAGEA9

CUL3

ALDOB

NPSR1

DOLK

SERPINA7

MT-TF

DPYSL5

HLA-DOA

ABO

IFT20

DPF2

RHEBL1

ALG12

FAP

EIF3A

MIR199A2

PTPRU

CTSH

MIRLET7F2

POU4F1

HCK

TRMU

FGF6

PSMD3

AP4M1  
FPGS  
SLC39A8  
CFD  
SIRT3  
KIR2DL1  
TPBG  
CAMK4  
MUCL1  
SFRP2  
SCN8A  
IGHV4-38-2  
PSMC5  
PTP4A3  
USH1C  
TRIM29  
RPS20  
BCL2L2  
GRHPR  
CUL4A  
EOGT  
C19orf12  
IL25  
MIR181B2  
ARG2



HOXB7  
FEZF1  
S100A14  
RTN4  
PCA3  
HOXA11  
CDK5  
PRPF19  
GTF2H4  
POMGNT2  
PNMA2  
SLC39A6  
WG  
TJP2  
ITPKC  
FNIP2  
P4HTM  
SLC9A1  
RAB8A  
NXN  
CXCL14  
NFU1  
HDAC3  
RAPGEF3  
CLDN16

ASRT3

ASRT4

ASRT6

ASRT8

KLHDC8B

FAM20C

RPN2

TNNI2

FXYD2

PER3

INSL3

ALPG

KCNN4

RETREG1

CDC27

CHD4

FZD10

MYCBP2

MERTK

PLD2

THBS2

B4GALT7

GANAB

MIPEP

COL8A2

TFAP2C

HUWE1

ARHGDIA

KLK11

HSD17B3

CD1E

FUT3

PTBP1

UBE2A

HTR2B

HHAT

TAGLN

MIR33B

SLAMF6

CENPB

TMSB4X

VTI1A

SHOX

OLR1

EFL1

GSS

CLEC6A

MIR371A

MT-TS1

NTSR1

PSMD5  
MRC1  
FOXL2  
MEF2C  
GRM5  
MEIS1  
GPC5  
CSTA  
IL5RA  
CCAR2  
CACNA1G-AS1  
PEA15  
NDUFS4  
PIGT  
LTB4R  
TREM2  
HLA-DMA  
PIWIL1  
SALL1  
SERPINI1  
EI24  
DEPDC5  
EPM2A  
UGT8  
KAT8

HIPK2

HCCS

PSMA5

NCR3

SPAM1

TIMM8A

ASPSCR1

ADAM10

CPA4

GEMIN2

LTC4S

TANGO2

PRKAR1B

GAS6

ZC4H2

TFDP1

RHOBTB2

GRK5

IGFBP6

PAX1

PRC1

PTGES2

MIR671

SPPL2C

GABRB3

IGF2BP2

BANP

GLS

ETFA

PFKM

CD47

CAST

RING1

TET1

CLCN3

ST3GAL3

ADD1

PBOV1

LINC01194

STT3A

FGF17

POMT2

SLC45A3

KDSR

KLRD1

SRRT

TMPRSS4

MIR19B1

ZNF217

MAPK12

MNT

ENSG00000179253

GMPPB

C3AR1

QKI

PSMC6

RECQL5

DNA2

TMTC3

PLK4

FGFRL1

NOS1AP

FGF13

CHST3

MIR92A2

LILRB1

WNT5B

CRAT

YY1AP1

CRNN

CYP51A1

KLK13

PTCH2

SSB

HMGCL

CLEC3B

TTN-AS1

ERLIN2

TPH2

KRT6A

BTRC

MIR487B

TUBB2A

GFRA1

GBE1

CREB3L4

C7

AKR1C2

MIR501

SATB1

MT-TH

ASPH

PNPO

MSH5

PRDX4

PHLPP1

SEMA5A

AOC3

WDR26

ICAM2



MRC2  
MIR129-2  
STXBP1  
TEC  
NISCH  
FDFT1  
HS6ST1  
ITGA8  
HIP1  
BACH1  
DOCK6  
KLRC1  
PDLIM1  
LAMTOR2  
DACH1  
ABCC5  
PLXNB1  
GRHL3  
DYNLL1  
CCT7  
NKX2-8  
GSTO1  
GRIA3  
MIR382  
BBS12

COL9A1  
CALCRL  
RAD9A  
NR5A2  
ARNT  
KLK1  
KIAA1549  
RTL1  
MIR433  
RNASE2  
BAG3  
ERMARD  
LATS1  
SPAG6  
FCN1  
PIBF1  
SHANK3  
ALOX12B  
CNTLN  
KCNA2  
OPCML  
KLKB1  
GOLM1  
URGCP  
ZNF384

DEAF1  
RAB1A  
ACTL6A  
SRP72  
YWHAQ  
UGT2B17  
GUCY1A1  
NDRG2  
FLVCR1  
TMC6  
CDX1  
GTF2H1  
ADGRG1  
BAG6  
CHFR  
LACC1  
KLHL40  
TBL2  
SCYL1  
DEFA1  
IFNAR2  
AKAP12  
PPARGC1A  
MIR1-1  
PCLAF

DCAF8  
PRKG2  
JAZF1  
LOC111674463  
ACSL4  
SLC25A24  
IFT81  
SH3GL1  
PIGG  
BRD2  
MMD  
DST  
AFF2  
DPP10-AS1  
MIR500A  
PGD  
PHACTR1  
PDE4B  
CDCA7L  
CISD2  
RBL1  
HEY2  
MAF  
FABP2  
UNC13A

CACNB4

A4GALT

QSOX1

APOLD1

CUBN

MAGEA2

PSMC3

H2BC21

CA8

RNH1

KPNA2

UBE2N

MT2A

RIT1

DYRK1A

SCARB1

SLC27A5

UCP2

NFAT5

TUBA1B

LAMA1

PSMA2

KIAA0556

HAND2

UGT1A7

ADIPOR2

HTR2C

CXCL11

TYROBP

HACD1

SNTA1

CLIC1

GP5

MIR628

NSD3

LTBP1

TXK

CLCN4

JRK

B3GAT3

SLC26A9

BACE1-AS

CLUAP1

PICALM

CACNB2

VKORC1

PPOX

TAPT1

FERMT2

NUDT1

HEIH  
DNALI1  
PROK1  
MYOM2  
ENTPD1  
TLE1  
CRABP2  
UTP4  
NUP98  
PSMD1  
LMOD1  
PSMD10  
SLC18A2  
IGF2BP1  
APELA  
COL9A2  
EIF2S1  
LEF1-AS1  
ERVW-1  
MLLT10  
GLIPR1  
CTNNA3  
BLZF1  
ELOC  
RBBP6

MBD2  
NPAS2  
KDM5A  
LRP4  
PGAM2  
NUMB  
NT5C1B  
FZD8  
MIR124-2  
FER  
NAA50  
PLEKHA8  
PRUNE1  
MYO5B  
CLMP  
RAD18  
PDSS2  
CD177  
RAP1B  
AFF4  
BRD7  
ANK1  
IL3RA  
LATS2  
USP15



ANG  
ACTN2  
EFNB1  
NCOA4  
NSDHL  
CRLF1  
CYP4F22  
RALGDS  
NLRP5  
SCD  
DHODH  
PRAC1  
DNAJB1  
MAN2A1  
RBL2  
PSMB3  
NEDD4  
H4C6  
SLC39A10  
PCSK2  
WNT6  
SEC31A  
DDX11  
CPT1A  
MIR520A

SPTA1  
ERRFI1  
MGAT5  
GYPA  
FPR1  
CXCL6  
AEBP1  
FAAH  
CBSL  
POLR2A  
MIR301A  
ANK3  
BBIP1  
OLIG2  
CREB3  
MAP1LC3B  
DNAJC6  
ST6GAL1  
MMEL1  
FBX011  
ENPP3  
PRDM14  
BCL2A1  
SLC6A19  
YES1

TUT1  
SLC5A5  
WDR62  
RIPK2  
CETN2  
SMPD2  
DISP1  
FZD1  
CLTC  
EHD4  
S1PR1  
DYNC1I2  
CFAP47  
GTF2H2  
ST8SIA2  
MSI1  
ENSG00000080572  
RGS2  
LHX1  
MAPRE1  
ITPR1  
GJC1  
KCNJ10  
HK1  
AMT

IL9R  
SLC39A4  
TNIP1  
TRPC1  
UGT2B15  
PRKAB1  
KCNQ3  
XAB2  
CHD3  
PBK  
SLC20A1  
APOA4  
IL36G  
MT-TS2  
IFT57  
CFHR4  
CSE1L  
CD151  
PCDH10  
IL10RB  
ANKLE1  
GPR35  
RDH10  
FBL  
SLC9A3R2

SKP1  
OCLN  
WDTC1  
CLN6  
AGFG1  
SUV39H1  
CLDN2  
SEC24D  
SLC12A5  
SP3  
TGFB1I1  
RFWD3  
SLC25A11  
ESRRG  
PAK4  
CRX  
COG1  
TLL12  
NPS  
EYA2  
KRT6B  
NRL  
FBXL19-AS1  
PSMC2  
PLTP

ICAM3  
APCS  
SIX2  
LYPD1  
CCRL2  
FLII  
DLEU1  
NBAS  
PLPP5  
UBR5  
GABRA3  
DMTN  
HIF1A-AS2  
LOC110806262  
MEI1  
CEL  
CFAP52  
PAM  
SOCS2  
H2AC20  
JUND  
POU5F1B  
HLA-DRB3  
CRK  
NUDT6

SLC20A2

CASP5

PPP2CA

LINC01138

CS

SLC10A2

ALKBH3

MEST

FOLR2

CSNK1E

CEP164

GGCT

MCU

SPIB

DNAH12

PIGO

TUBB2B

LRIG1

BTC

POU1F1

SERPIND1

RAB3GAP2

RDX

SERPINB4

SLC7A8

SPTB

UCP1

ETV7

PTGDR

TCTE3

CCP110

FCER1A

ZFP57

MMRN1

TAL1

MIR9-2

GALK1

GGH

SSTR4

STAG3L2

PTBP3

LMTK3

USP1

XAF1

CARD14

PSME2

SDC2

SLC02B1

MN1

CPLX1



SLC7A6

IL37

FAH

C4BPA

KCTD1

ACACA

PACS1

DCDC2

UPF1

ABCB5

MIR422A

EMG1

NDUFS3

PSMD11

CHRNE

CNDP2

SF3B2

SLC45A2

MPG

C5orf66-AS1

ADAM28

FRZB

CRTC1

NUP188

ABCA4

DLX4  
C11orf80  
LPXN  
TBL1X  
HSF1  
CRABP1  
ELAVL3  
TXNDC15  
EPHA5  
CXCL16  
ROBO4  
ALDH3A1  
SNRNP70  
BCAS2  
NAT9  
EBP  
ATOH1  
MTSS1  
MAP1LC3A  
SLC25A20  
RNF185  
MARK4  
LECT2  
PTPRD  
LBX1

SHOX2

C1D

SSTR3

GGT2

TSPAN7

KANSL1

GPHN

TNKS

VASP

DCLK3

PEX6

TWNK

TACC2

HAS1

GABARAPL1

POU2F1

SURF1

MIR605

SDCBP

TRMT2A

PSG1

SYNE2

RNF8

PSMB2

ABCG1

MAOB  
TEKT3  
SF3B4  
SIRT6  
PSMD7  
MT-ND4L  
CPQ  
GJB4  
GDF5  
EGLN3  
ADRA2A  
MIR20B  
CDT1  
CDK5RAP2  
LGALS8  
RPS28  
EIF6  
SLC12A2  
PACRG  
PHF10  
HSD17B4  
PURA  
LUM  
IPW  
PLEKHM1

MT-TQ

REG1A

PARVA

RNF5

ABI1

NRIP1

IFNAR1

TNFRSF12A

MAP4K3

CDC5L

ITGB6

CEP152

FUT8

H4C8

SLC5A2

ZNF148

BATF2

MIR211

PPP1R15B

MT-TW

VIPAS39

FCRL3

ACY1

ALS2

PLCZ1

CHIC2  
MIR509-1  
MAFB  
PDYN  
ADRA1B  
MYH2  
CCDC86  
RPN1  
SFRP4  
RORA  
CCN3  
TCP1  
SLC16A4  
FAM187A  
CFAP298-TCP10L  
ACAT1  
SOX5  
GJA8  
HSPE1  
RAD23A  
SPAG17  
CYGB  
LAMC3  
SARS2  
MAGEA10

SIRT2  
CASC3  
MLST8  
APLN  
MIR383  
PPP1CA  
HMGCS2  
MMP17  
PSMD8  
H4C3  
TGM5  
SSRP1  
IFT46  
ZBTB7A  
RAB35  
PTPRN  
CLEC4E  
IL18BP  
ARRB1  
MLN  
DVL2  
TRADD  
LAX1  
CCAR1  
SNORD115-1

ZIC1  
KCNE3  
MGAT2  
CIC  
TRA  
KCNT1  
EPPIN  
MIR299  
UROS  
GPC1  
LOXL4  
TALD01  
ABAT  
KDM5C  
H4C11  
ADARB2-AS1  
LINC01405  
WDR81  
DYNLT1  
HOXB5  
SLC9A6  
SYNM  
ADCY9  
TRIM8  
PKD1P6-NPIPP1



BAIAP2  
H19-ICR  
GSTM4  
MAGEA11  
HOXA3  
LHX3  
RERG  
ATXN7  
IQSEC2  
LOC111674464  
PCSK1  
MAP2K3  
HBS1L  
CAMK2G  
H4C9  
CRISP3  
ADK  
PDK1  
AKAP3  
NPAP1  
ARNT2  
SUCO  
USP13  
PPT1  
TNFSF8

EPGN  
GABRA2  
SCAP  
SEMA3E  
KLK15  
BMP10  
FXD5  
LPR2  
FHL2  
GEMIN4  
DDIT4  
GGTLC3  
ICMT  
PSMB1  
FMN1  
RNF2  
CCDC22  
GABBR2  
PCCB  
TXNIP  
APC2  
SLC1A5  
ANKK1  
LZTFL1  
TRAP1

C3orf35

PPP1CB

DACT1

BRD9

G3BP1

H4C2

IL1R2

CD200

ALG13

RGCC

PLOD3

CNTNAP2

IL17RB

VIPR2

H4C5

HNRNPC

KCNJ18

CCR9

MASP1

GAP43

ERP29

PSPH

TFAM

CSH1

DNAJB4

PINK1  
PTMA  
RHOH  
MMP26  
PTCPRN  
MIR505  
CAPN1  
ACOX1  
KEL  
CPA3  
RPL38  
DERL2  
RP9  
SLC2A3  
CASC11  
EGOT  
CLEC12A  
DPP10  
CFTR-AS1  
HHT3  
GNB1L  
HSPA14  
H4C14  
ERLIN1  
IFT22

H4C15  
SMYD3  
EHHADH  
CHRNA1  
SPAG16  
KRT15  
LEFTY1  
SOX7  
MIR7-3  
LEMD3  
H4C12  
GKN1  
MED15  
CLDN10  
ALKBH5  
ARRDC3  
TAB2  
SSR4  
COL9A3  
SLC16A7  
SLC13A5  
CCNT1  
MUC12  
PNKP  
RPS6KA1

FLRT3  
PARD3  
FUBP1  
ITIH4  
AP2B1  
UTS2  
CLEC4M  
TRAT1  
EPB41  
ACLY  
CNTN1  
RMI1  
MAP3K5  
HRH3  
VPREB1  
BAMBI  
MLX  
SLC19A2  
HOXB2  
TPP2  
CPA6  
COL14A1  
LRAT  
ULK1  
RNASET2

CECR7

H4C4

MIR325

PLA2G1B

SCN3A

PITX3

H4C13

RXFP1

IRF9

SLC2A9

ABCB6

SOX1

ATP13A2

KRT9

CYP2C8

DENND1B

RAI1

CBLIF

UBE3B

RIPK3

ARFRP1

IL17D

EGLN2

HBG1

GMPS

NMT1  
TEKT2  
RFX2  
MATN3  
ARMC5  
CHD2  
ASPRV1  
DAW1  
KIF3B  
PHLPP2  
BRINP1  
RXFP2  
SLC5A1  
POLR1D  
BCAS1  
PDLIM5  
TDRG1  
AZGP1  
PYGL  
SPECC1L  
SLC19A3  
CDON  
SEMA6A  
RO60  
H3C14



LONP1  
CEP83  
NDUFS1  
CATSPER1  
TTC30B  
CD84  
FBLN2  
COBL  
LMX1B  
NUP160  
TTF1  
DDX5  
MRTFA  
PEX13  
SLC26A1  
MPI  
RMC1  
EFHC1  
NDUFS2  
SCARF2  
ANLN  
EIF5A2  
HBD  
SPRY1  
ATP11B

CALM2  
BHMT  
NOX5  
RBM3  
ALDH9A1  
COL27A1  
GDAP1  
PTF1A  
AMHR2  
THSD4  
RINT1  
AMPD1  
USP28  
BOLA3  
SCLT1  
CLN5  
RPE65  
SPEF1  
SLC1A4  
NPR3  
PAX4  
SLC30A8  
BNC2  
SERPINA4  
SHMT1

LGALS9  
PDZD2  
MBD5  
CTDSPL  
HOGA1  
CDR1  
DLG3  
PSMA8  
ROPN1L  
AKR1A1  
MCM3  
TNKS2  
ALDH1L1  
CEBPD  
MAGEA5  
VGF  
TGM6  
UQCRFS1  
DPP6  
GABRR3  
TULP3  
TLN1  
PLA2R1  
SHROOM4  
GNAI2

NEGR1  
SPG11  
CAVIN3  
PRUNE2  
CTAG1A  
YWHAG  
SCGB2A1  
NME2  
SLIT3  
NBEAL2  
THEM4  
SEC61A1  
ARRB2  
SLC7A9  
GSTA2  
GFPT1  
TEKT4  
TWIST2  
COL12A1  
DIO2  
CHL1  
KLHL41  
PCCA  
GNL3  
CACNA2D1

GSTA4  
ZNRF3  
HUS1  
SERAC1  
S1PR3  
GYS2  
ST3GAL4  
UGT1A8  
ANGPTL4  
LOC111674475  
HCN4  
CNR2  
MIR208A  
BUD23  
GART  
CEP85L  
GPR87  
LOC108684022  
TDP1  
NPB  
MARK3  
C1QBP  
PDHA1  
SUOX  
PUS1

TRPM1  
NLRP2  
ADRA2B  
DNAH17  
LNPEP  
LHX4  
MIR103A2  
PEX5  
FRS2  
ACVR1B  
PRKCG  
CDC42BPB  
VLDLR  
FZD3  
SYT7  
TRIO  
ST3GAL6  
OXA1L  
LIN28A  
KIAA1109  
ANKRD11  
TRMT10C  
TAPVR1  
LYZ  
EPHA1

KIF17  
MMUT  
PINX1  
DIRAS3  
STARD3  
SRCAP  
HAPLN1  
TEKT5  
DYSF  
REPS2  
POLD4  
ALX3  
ACADL  
PIH1D1  
GABBR1  
NNMT  
MIR369  
DIO1  
ANKRD30A  
CORT  
PHF11  
SNW1  
MIR155HG  
OPTN  
LOC108449897

TRPC3

FOXF2

CD1C

GOLPH3

PPP1R15A

ATRIP

TRPM4

HPX

AZU1

EIF5A

AGRP

ADRA1A

C19orf48

CFL2

CTPS1

SPON2

LINC-PINT

DAND5

DCHS1

GTF2H3

FLOT1

PRINS

CTBP2

CHD5

DUSP19



DGCR9  
CD1B  
LOC111674472  
LOC113664106  
IMPDH1  
DNAH6  
SMARCC1  
NLRC5  
FSTL1  
TLL3  
SQLE  
SMTN  
CENPF  
ITPA  
USP22  
RIPPLY2  
KIR2DL3  
STK11IP  
LGI4  
AZIN1  
AMBRA1  
SERBP1  
TRRAP  
FGL1  
NDUFA1

THBS3  
SLAMF7  
SLC1A7  
AFF1  
ATXN1  
TBX22  
CELF1  
TAS2R38  
OXTR  
PRKCSH  
GOLGB1  
BSND  
DNAL4  
AGBL5  
CST6  
CROCC  
RPL3  
ADH5  
RCHY1  
PEX11B  
NOB1  
AOAH  
ARMS2  
LINC00977  
LOC111674478

LOC111674479

IARS2

LOC113633877

FREM1

PTGIR

SMNDC1

SLITRK1

ISCA1

ATG14

OPN4

LOC111674465

LOC111674473

LOC108491823

GSTM2

RPL22

HSPB11

DCTD

MYT1L

EGFL7

MTNR1A

TBXAS1

LOC113604967

DONSON

FOXO4

KPNB1

KLF9  
PDIA3  
CD109  
SLC25A42  
SPIN1  
F13B  
BNIP3L  
LOC111674474  
LOC113664107  
CBFA2T3  
ATG16L1  
NR1I3  
HSD17B8  
GPA33  
SH3BP5  
PSIP1  
CTNNBIP1  
RAB38  
UGT1A  
HAS2  
DLG5  
WM1  
MYO1H  
CTSA  
ECI2

MPDU1  
WDR66  
RAB6A  
NDUFV2  
GPX4  
CNN1  
SLC4A2  
RBP5  
MEG8  
ACSL5  
AAGAB  
TES  
LOC111674466  
KIFAP3  
ARHGAP29  
DDX20  
ARL13A  
LOC111674470  
LOC111674476  
LOC111674477  
LOC113523647  
RNF31  
SH2B1  
MIR7-1  
LOC113633875

LOC113633876

FABP5

ADGRG2

PDE6D

SLC52A2

NRTN

ATP6V1A

SNX14

LOC111674471

SIGMAR1

PIWIL2

ESCO2

CSNK2A2

GLCCI1

TAC3

MED1

RAB1B

DDX53

GYS1

EPPK1

CCDC170

NUPR1

HYAL3

MIR367

CFM1

OR51E2  
PPRC1  
LAG3  
COQ6  
HSD17B13  
TBC1D23  
RASGRP4  
CTSE  
MAATS1  
PITX1  
C6  
MAP3K3  
CEMIP  
STK24  
TGM4  
ESRRB  
CANT1  
LOC111674467  
HCRTR2  
TAF1C  
ZFYVE26  
TMEM106B  
LDHB  
SNORD116-1  
SASS6

HCP5  
KIAA0100  
DECR1  
MNS1  
NME7  
CEP89  
KHDRBS1  
NUP85  
DCBLD2  
MED19  
CNMD  
FAM189A1  
ATP6AP2  
MFAP2  
LAS1L  
PNKD  
HCFC1  
DRC3  
OLFM4  
MICAL1  
AUTS2  
FGF14  
WNT10A  
PATZ1  
GSTO2



COLCA2

UNC5B

SLC7A2

ELP3

CMIP

PRSS3

CTSS

DNAH2

CHAF1A

DLD

KCND3

MATN1

KIF27

ASAH2

ZYX

ACTR2

SPAST

MADCAM1

QDPR

ANXA4

STAG3

SLC27A4

CRY1

TNFAIP8

WDR5

COR01C

ADIRF

GPR55

MYBL2

PI4KA

SP4

AURKC

PHYH

CDK20

CCN5

NPR2

NUP93

LOC108449888

SCN2B

PGAM1

GBA2

COQ7

RS1

H3C2

ENPEP

NELFCD

MZB1

RNU6ATAC

APLNR

CHST11

HTR1D

ACER3

ACR

DUOXA2

DCAF17

ACKR2

CDC7

NDUFV1

PON3

DNAJA2

SUMO1

HOTAIRM1

ARHGDIB

DNAH14

MMP16

IL17RD

DCLRE1A

CERT1

CBLB

COQ8A

VSX2

TFF2

ITGA1

OGA

GCNT3

HAND1  
TARBP2  
GLRA1  
ADGRE5  
EEF2  
TRPM6  
FAT2  
ALG1  
FOSB  
PEX26  
SEMA4F  
CDHR3  
COASY  
ALPI  
GABRB2  
GDF6  
MTX1  
PLRG1  
DIAPH1  
ETFB  
SLX1A  
EYA3  
KAT6A  
GNMT  
OGT

MIR615

TTC14

EHF

ACTN1

CKM

ADAT3

TEKT1

CIZ1

ZNF426

PFKFB3

FABP1

CSPG4

UBR4

MMP15

RFX7

RANBP1

MKRN3-AS1

NUP205

ADH4

FBF1

TRERNA1

MBL3P

C8A

TRPM7

TSPAN4

PTK7  
HIC2  
PEX14  
USP6  
TRIM33  
DPEP1  
MAP3K14  
ESPN  
KLK8  
PI16  
NOTUM  
COLCA1  
GPR182  
DPCD  
DELEC1  
FAF1  
ALG11  
NUP133  
USP4  
GALNT11  
SI  
SLURP1  
EGFL6  
ATL1  
SAA2

GAR1  
P4HA2  
IFITM3  
LMNB1  
TEP1  
WBP2NL  
WASF1  
PRPS2  
TEAD1  
GBX2  
TAGAP  
ADAMTS4  
NPR1  
WDR11  
SNORD63  
RPA3  
POLR2L  
SP2  
S100A11  
ATIC  
HLA-DRB4  
HSPA1B  
LILRB3  
KIF14  
SIX5

DNAH10

PEG3

PIM2

PCBP1

MAP4

AIF1

HEPH

SEC23B

MCTP2

KHDRBS3

MIR379

CFHR5

CSMD1

GPR161

LARP1

DNAJA3

CELA3B

IL21-AS1

GCDH

SLC35D1

TBX18

DTNA

NPAT

AARS1

PAF1



SYNPO

GTF3A

RAB3GAP1

LMAN1

MLLT3

FKBP1A

EXOSC9

PHF20

GZMA

KRTCAP2

ALLC

CA12

CD48

DEPTOR

TNNT3

GAPLINC

HLA-DMB

FABP12

CNTNAP1

RFX1

CCDC154

FOXL1

HTRA2

SPRTN

NDUFB3

NPC1L1

MGME1

PRIMPOL

TCTE1

TNFRSF19

MCM3AP

PEX19

CDH4

IQCA1

SLX1B

PTGER1

FADS1

BASP1

MARK1

SOAT1

SCAI

CYP46A1

APBB1

TMPRSS11A

ELAVL2

SLC10A1

PAGR1

FBN3

PFN1

PHF6

LOC107988032

NEFH

FAAP24

AK7

DLX5

TRNT1

EXTL3

TTC17

ATP8A1

ADD3

MYOT

CREB3L2

PTAFR

ANXA11

WDR20

FAM167A

COL4A6

SCG5

TIMMDC1

TUBA8

SPTLC2

H3-3B

RSPH6A

SLC6A5

PQBP1

UNC93B1  
HAND2-AS1  
RFX3  
KIFBP  
OPRD1  
TCF20  
GATD3A  
TNFRSF14  
STH  
MAGEA2B  
GLMN  
SCUBE2  
TLL1  
CKS2  
DUXAP10  
PPP1R12A  
IL19  
TGM3  
CARD10  
AP1S1  
ERCC6L2  
RPAP3  
CSH2  
FRK  
PNPLA1

SNU13  
MFSD8  
CYTH1  
UPF3B  
EFS  
MAPKAPK2  
MTMR10  
ENSG00000224086  
KANSL3  
AFDN  
GLRB  
HTRA3  
ADRA2C  
NUDC  
CTNS  
FGD4  
HMGB3  
NDP  
COL26A1  
TXNDC2  
MYSM1  
HNRNPDL  
LSM8  
LTB  
DSCAM

GYG1  
MIR362  
DMP1  
VANGL2  
CHRD1  
PRX  
CLNK  
RCAN1  
GAB2  
SLC35B2  
SC5D  
SNRPB  
UBASH3A  
CERS1  
MTA3  
EME1  
TOP2B  
WNT8B  
AGAP2  
MBD1  
YWHAB  
ZNHIT3  
PIF1  
CFAP54  
GNAI3

NAA15  
NDUFAF2  
UPK1A  
NEK3  
MYOC  
GAS2  
PEX16  
SEMA4D  
PTPN2  
BLCAP  
LOC107303340  
ABCD1  
HNRNPH1  
LIMA1  
SLC27A1  
INHBB  
GNA15  
MIR944  
KTWS  
LOC106029312  
KLF10  
MYBPC1  
FXR1  
FAS-AS1  
ASAP1

DPYSL2

MLPH

SMURF1

CHPT1

REEP5

MYF6

MEF2D

GRK6

HSPA1L

TRAPPC10

AMER1

SNHG3

ATP1A4

KAT2A

PPAT

NFE2

CYP2R1

ST3GAL5

TRIM22

WASL

STARD7

RNU6-1

SNRPE

MAGEA8

SELENOP



FAM50B  
SEPTIN5  
TNFAIP6  
NMD3  
FBXL4  
SLC8A1  
KIR3DL2  
FLOT2  
ANO5  
RYR3  
ASRGL1  
DEFB103B  
CTU1  
SYT1  
MAT2A  
PRKCH  
MSM01  
UGP2  
TSSK1B  
WASHC4  
PTGES3  
L2HGDH  
MSI2  
ATP13A3  
DUSP5

HNRNPU  
NTF4  
ADAMTS17  
EFNB2  
PCYT1A  
PRSS21  
GHITM  
GRM7  
AOPEP  
ZMYM2  
TLL9  
TM4SF1  
KIF5A  
ITPR3  
GRB10  
LOC107457585  
RARS2  
LAMB4  
SLC6A9  
DDX59  
MCCC1  
LARGE1  
TTPA  
PRDM8  
CNGA3

MIR614

SENP1

MID2

NFKBIL1

KIR2DS4

ATP2A3

ATXN10

PCDH7

NKX2-2

RMND5B

PDF

BVES

ING4

HYMAI

IP013

NR2E3

IL26

ENKUR

STK39

MAP3K6

KRT74

CCT5

MLLT1

RIPK4

HDAC7

DCD  
CYFIP1  
CD248  
TMEM238L  
PLEKHG5  
PIGW  
MTCP1  
IMMT  
LSG1  
DAO  
PFAS  
SNHG14  
GYPB  
PNPLA3  
NAF1  
SOCS6  
NDUFS6  
HCRTR1  
C9  
NELL1  
WDYHV1  
SSX4B  
RARRES2  
ELP6  
ANO3

TOPORS

IFRD2

MHRT

MRPS22

NSMF

BRD3

NABP1

HLA-DPB2

APOM

FXYD1

FASTKD2

GYPC

CRY2

ARHGEF2

CHD8

SHANK2

CFAP44

SPINK7

LIMD1

HSD17B2

TRPA1

H3-4

GINS1

ITGB5

MAGEC1

KMT2B

UTRN

NEU2

GNG10

VSX1

DUSP4

SYTL2

RACGAP1

EXOSC3

FGR

DCLRE1B

CLCN6

IER3

OPRK1

NPAS3

PDE3B

SLC12A4

A2M

ISG20

PSMB7

DYM

RNU5A-1

LCP1

TRAPPC2

DNM1

SLC39A2

AGMX2

NPSR1-AS1

CENPA

LDB3

MYOZ2

MEIS2

SLC25A19

LCN1

OPA3

COIL

ONECUT1

CUL7

MIR18B

ATL3

KIR2DL4

PENK

SLC44A1

CILK1

DPAGT1

SKIL

SAPCD2

RTEL1-TNFRSF6B

RAMP2

DISC2

DOT1L  
INTS8  
CLDN6  
ZKSCAN1  
MGST1  
NDUFB11  
LOC110006317  
LOC110006318  
ACAD9  
NPTN  
ATP5IF1  
CACNA1F  
BCL2L13  
HBB-LCR  
NR2F1  
DNAAF4-CCPG1  
TTF2  
PPFIBP1  
CHSY1  
GJB3  
PPP2R2A  
MYO1C  
CD01  
TSPYL2  
ASIC1



PSMC3IP

GNA14

CYP7B1

EVL

CENPW

IQCD

VMA21

ZFP36L1

PA2G4

NME5

UGT2B7

PRKD2

XPNPEP3

F2RL2

SNAPIN

MAGI2

TMEM30A

CCDC141

CCT3

GPX7

PLEKHM2

MLC1

DNAJB11

PLPBP

CLDN19

GLRX

DLX6-AS1

COX15

EPHB3

SCN3B

F11R

TTC8

EXOSC10

SLC30A1

CHRNA2

STOML2

PIH1D2

EMP1

CAPNS1

RBBP7

ANGPTL2

BCORL1

SDC4

ROBO2

CENPJ

HSPA2

ACYP1

MTA2

TRDMT1

FAM215A

PSORS1C1

LAMP3

PGA5

PBXIP1

CFAP61

WDR48

MIR2861

CARS2

TMEM245

SEPTIN2

WSCD1

DAD1

TSEN54

FOXI1

SLC17A6

RBM39

ATP8A2

ADAMTS1

CFAP161

NEIL1

LCA5

SPARCL1

PNMT

CCKAR

GIPC1

PTCRA

DRG2

OSTM1

AGBL1

MIR629

FGFBP2

PDE2A

MIR2052HG

FRAT1

GATM

PTPRZ1

COG6

CLEC11A

PARP2

SLC4A4

PTPRB

EPS8

SAMM50

CNTN2

PNPP1

SLC04A1

NCF4-AS1

CBARP

MAVS

PEX2

CRHR2

MCRS1

MIR365A

SLC22A12

TLL6

LMO7

BRCC3

SLC9A7

CBX3

KIAA0319

NNAT

POLR2E

AGO1

RTTN

ABCC9

TTK

GMNC

CASP4

MATN4

UBD

ITM2B

TMEM30B

DRC7

FDX1

SHQ1

SEPHS2

DNAJA1

FMOD

SPEM1

RAB7B

CHAMP1

KLHL24

KNL1

USP14

PRB1

GRK2

ROM01

JDP2

GGT3P

HCN1

NDUFA6

RASSF2

INSRR

KCNK18

D2HGDH

PICK1

PPP3CA

GGNBP2

DPYS

NMU

NCK1  
CYS1  
DYRK2  
PAK3  
UNC5C  
GLYATL1  
MIR1246  
MTUS2  
PAM16  
PHKA2  
PGA3  
BIRC6  
OTOA  
SGCE  
TRG  
OGDH  
SP100  
MRPL28  
OPLAH  
IGLON5  
SNIP1  
CDK10  
RPL7A  
CELF2  
TMSB10

OGFR  
SLC5A8  
FOXD1  
KANSL2  
POMK  
INPP4A  
CTHRC1  
DAOA-AS1  
MIR1304  
FNDC3B  
LALBA  
VTI1B  
SEMA4B  
SPTBN1  
CCL25  
LGALS2  
KDM3A  
OPALIN  
STX2  
GDF11  
SLC4A5  
ESD  
RUVBL1  
SEC22B  
WSPAR



GCSH

TRIM39

CDK2AP1

TKTL1

KIF5C

HR

IFIT3

NDUFAF5

ME2

MIR194-1

CXCL17

TNFSF9

MYPN

PLAC1

BCAP31

AANAT

KLF8

SLC4A1AP

LPAR6

PKP3

TIGAR

ALPK3

FZD9

PAPSS2

FAT1

ADSS1  
KIF4A  
NDUFS8  
MLKL  
WTAP  
PGA4  
KRBOX4  
PAK2  
PEX12  
PDP1  
SMPD4  
PANK1  
GP2  
MCM8  
SNRNP200  
CUL4B  
GATAD2B  
SEC63  
OTULIN  
AOC4P  
LMTK2  
FOXQ1  
MIR26A2  
KDM6B  
STEAP1

CCDC63

DNAH8-AS1

NUAK1

H1-3

SYVN1

CERS3

MIR302A

PLIN2

TBX10

NLGN4X

FOXE3

ADM2

GSC

PDSS1

CYB5A

DUSP13

TAT

ZDHHC8

MT-ATP8

LINC00336

PPIE

ITIH5

STX3

TMEM97

PCAT14

ABHD11-AS1

CACYBP

NEO1

CAVIN2

FARS2

CD96

FAM107A

SMARCA5

GABRB1

VPS33B

NEUROG2

AVPR1B

WWP2

AIMP1

RNASEH2C

ABT1

GK

ADAM19

REEP1

DPYSL3

SMS

MELTF

DMRT1

FLVCR2

FGFR10P

TAC01  
ARSL  
LRG1  
NPTX2  
NUCKS1  
NDUFS7  
SPG21  
NADSYN1  
POLN  
PYGB  
ATP1B2  
H2AC21  
FZD5  
PEX3  
HOXA4  
ZNF74  
ADH7  
INPP5D  
CBFA2T2  
E2F7  
FGG  
PEX7  
CPVL  
GNAL  
YPEL2

RNASEH2A  
CALCB  
NONO  
SIK3  
NFKB1B  
SIRT7  
SLC6A14  
DAZL  
PPP6C  
TRIP10  
RPS6KA5  
ATP11C  
SFPQ  
DGKE  
ENSG00000287119  
NDUFAF1  
MMP19  
SUPT16H  
AOC1  
SPRED1  
TRA2B  
GTPBP1  
ALG3  
PAX9  
B3GALNT2

WNT9B

TCF15

CDC34

CBR3

BCKDHA

SEPSECS

FBLIM1

GLS2

HGS

GJA4

MIR30C2

TRO

METAP2

CAPN9

IPLL5

PDCD6

MARCKSL1

BLOC1S4

ASTN2

LGMN

BFSP2

OSMR

CRHBP

CEP19

MTFMT

SIAH2

SIK2

FILIP1

ADPRH

POLR3B

GPR65

MLNR

MAP3K11

VTRNA2-1

GLIS2

SIRPA

RAI2

NEDD8

LINC01554

PXK

INTS3

HNRNPM

MIB1

S1PR2

RAP2A

CALB1

ALDH4A1

LGALS7

RBBP5

PSMD9



CSMD3  
FKBP1B  
HSPA6  
AP4E1  
ZBTB20  
SLC15A4  
WNK3  
PRKAB2  
ALG2  
ANKRD2  
CHRNA2  
BCL9  
CKAP4  
TCN1  
IL11RA  
RAB27B  
DLAT  
OCIAD1  
NRGN  
UGT1A9  
TMC1  
XPO1  
TMEM70  
MTTP  
OPA1

MIR940

RNF125

HOXB3

CACUL1

WNT16

ASIC2

ZRSR2

OGN

FOXK1

LARS2

CDC14A

PTGDS

RASD1

GRIN1

ZP2

HACE1

CERS2

CPSF4

SORT1

MRRF

NLK

DKK4

TAGLN2

PTDSS1

RPL29

ERAP2

INPP4B

PCDH8

LT01

SLC35E3

TMPRSS3

MATN2

HOXA7

S100A10

IQGAP3

PCM1

FOXRED1

JARID2

PPA2

FARP2

GUCA2B

PRICKLE1

ELK3

OSBP2

MARCO

MEAF6

SMARCA1

MT-TL2

FTX

IL34

CCNG2

CHAC1

ADAM15

HDAC8

NFIC

USF2

RPRD1B

FUT6

SKAP2

ZKSCAN3

COQ8B

CCDC88A

ACTRT3

NFIA

TENT5A

SULT1A2

TBC1D20

NLGN1

MYL4

SLC48A1

ACTR3

ITGB8

RBFOX1

HP1BP3

CD226

POP1  
HBP1  
CYP3A7  
KTN1  
ZBTB33  
FOSL2  
CAPN6  
KRT6C  
CDCA8  
SMOX  
PIR  
LINC00346  
RNGTT  
LGR6  
LINC01139  
KCNAB2  
GOSR2  
GAMT  
BTLA  
CBX4  
HNRNPR  
SDSL  
CARM1  
SELENOF  
TENT4B

DGCR

LAP3

MIR572

PROKR1

TRUB2

GRIA1

SV2A

DYRK1B

GREB1L

CRLF2

HHEX

HNRNPD

VSIR

MRPL40

ERC1

STT3B

KIR2DL2

KRT86

BCKDHB

NCF1C

TGS1

SIM2

EIF4A3

BLOC1S5

ELP2

BHLHE22  
ASH2L  
NSUN5  
PGC  
ARHGAP1  
TET3  
TSPAN12  
FM05  
CPT1B  
TTY7  
UHRF2  
NRXN3  
LOC107303338  
PCAT5  
CIRBP  
NPL  
CNKSR2  
BICDL1  
GLP1R  
ANGPTL1  
AOX1  
ARHGEF4  
IL22RA1  
CHRM1  
GNB2

BOK  
RNASE1  
CASQ1  
RAMP3  
DMXL2  
MAP4K4  
GALT  
NUP37  
HOXA2  
TRIT1  
GSTT2  
H3C4  
PRKX  
CHD6  
TRIM31  
SP6  
ELF4  
NIN  
MYO6  
ATP10A  
CHD1  
SOX6  
VIL1  
LOC113939944  
RASSF6



BACE1

NR2C2

HLA-F-AS1

ABCA7

FKBP4

CELA1

HAR1B

BST2

TBCB

RAB11A

OXLD1

COX6B1

HIF1AN

PBX3

USF1

GRM2

GDI1

SLC4A8

NOSTRIN

RPL34-AS1

PANX1

MTHFSD

KCNN3

HES5

IRS4

RN7SL1

POMP

KRT81

TLE6

ARFGEF1

TRHR

CCNC

ADCY6

OOEP

SUCLG2

DIO3

MXD1

SGPL1

WAC

GRK3

TRUB1

NEIL2

HSD17B12

MTHFD2

B3GNT2

COPS3

TEN1

EIF4H

APIP

GID8

UBR1

AATF

PRKAR2A

POMT1

PFKFB4

KCNK4

UBIAD1

GABPA

SRGAP2C

CACNA1E

NOP14

IPPK

SCP2

YARS1

ORC2

AK4

SERPINB9

E2F5

SND1

ABL2

WNK4

TRIB3

IL1RL2

STRN

LIMK2

KPTN  
FKBP8  
BIK  
SOX21-AS1  
NUTM1  
RAC3  
KRT83  
ABHD5  
JAM3  
C12orf57  
MFG8  
KIF2C  
IMPDH2  
ANP32A  
STBD1  
SIPA1  
ADAM23  
SLC1A1  
ALDH5A1  
CYP3A43  
MMAA  
NCRUPAR  
NSF  
BAZ1A  
MYO9B

ELF1  
PKDREJ  
BCL2L12  
ILF3  
RAB11FIP4  
SNHG17  
HCG11  
RAB18  
BMP15  
SUN2  
SEPTIN4  
TBX19  
GSC2  
LCT  
NDUFAF3  
VRK2  
GUSBP2  
RPH3AL  
OR6K6  
MT-TV  
PHLDA1  
DLEU2  
BFAR  
RBM15B  
TRIM44

LIME1

AHNAK

POU3F3

SYN2

RRAGC

AHSP

ANKAR

MGAM

TRIB1

LCP2

EED

AHDC1

DGCR6L

SEMA4C

OXCT1

CFC1B

B4GALT1

DLG4

COG7

HIRIP3

NECTIN4

RPL18

FAM189B

RAMP1

EN2

TMEM126B

PNPLA2

MIA

SH3PXD2B

RNF139

GNA13

HECW2

ARHGAP35

MPDZ

PDHX

CACNG5

HELQ

MIR100HG

DYNLRB1

ESRP1

HOXB4

IYD

PLA2G2D

BTG1

EPB42

TUSC8

TLX1

SPTBN2

THRIL

GET1

KANSL1-AS1

MT-TN

CHP2

PARD6A

VILL

VPS13C

CENPE

ANXA6

PMVK

CPM

PRC1-AS1

PREP

NPBWR1

EIF3D

DHX30

SGCG

ESPL1

PRPF31

DGCR10

CNOT1

NUP155

MANEA

MBNL1

SIGIRR

UBA1



SBF2

PRIMA1

MUC21

OR10AD1

AJAP1

RPL4

GSE1

FADS2

IQGAP2

SLC5A6

CST1

ING2

TLE3

FDX2

WNK2

KLF13

RGS3

OBSL1

BTG3

HIBCH

PTPRA

CBR1

CSN3

MIR302D

MIR411

PIK3R5

DLGAP5

RLN2

SEC62

MFJ

AARS2

TLX3

RCC2

SMYD2

PALM3

KCNRG

CLEC4C

STX1B

IBTK

MLYCD

CHERP

CAP1

POLR1C

DGKZ

ACSL1

DPT

GPS1

PUS7

IL18RAP

TPRKB

TP53AIP1

HRH4

POLG2

AIFM3

DAOA

ULK4

CCNF

SLC35F2

ZNF154

ZBTB17

UNC13B

SCARNA13

SEC14L2

HNRNPF

DDAH1

SLC39A13

RASGRP2

CCDC78

SLC2A5

OAS3

TTC21A

VSIG4

ATP5F1B

TRAPPC2B

MAGEF1

SLC22A6  
SLC24A5  
SPATA6  
TRARG1  
MAGED1  
FSHB  
STOM  
KIF20A  
TAOK3  
KCNK9  
MT-TT  
CDCA5  
EIF3M  
SPRY4-AS1  
PCDH15  
PCLO  
CAPG  
MIR138-2  
SLC6A18  
ERVK-6  
ZMYND11  
LOC110806306  
RPS4X  
SCTR  
ATP5PO

ZNF365

RGMB

SRGN

LMF1

GNAO1

SYNCRIP

SYNJ1

GMPR

PLEKHF1

AP3M2

KDM4B

MADD

CA5A

ELOVL4

IGSF6

SPATA5

TP53INP1

SPRR3

RHBG

OR13H1

SLC4A11

FAM120A

IL36B

PBX2

TOB1

SSR2  
TSC22D1  
MLLT11  
FGF21  
TSPAN31  
MIR135A2  
HLF  
GABRA5  
TRIM26  
UCP3  
CAPN10  
TRAPPC11  
TFDP3  
GPBAR1  
MAPKAP1  
DOCK2  
MIR1290  
CCT2  
FRY  
KCNJ13  
NDUFB9  
AVPR1A  
KPNA1  
LARS1  
CLDN11

CRACD

MAL

MIR484

MIR153-1

CASC19

ZSWIM6

AP2M1

KCNH5

LYNX1

CLCF1

XYLT2

STIP1

PRAM1

NFKBIE

GRIN2D

AMD1

PPP1R9B

EIF4A1

FUT7

SRPK1

AMPD2

RAET1G

AFAP1L1

CPLX3

DUT

FOXP4-AS1

LRMDA

PMCH

CSNK2B

DNAJC19

DOCK1

CDSN

NAALADL2

RIF1

LIN7A

KCNA4

MVD

LRRC43

INCENP

THOC6

MT1DP

GIT1

PRR11

KIF1C

VAC14

IQSEC1

NUCB2

KLHDC2

GEMIN5

SCARNA23



C20orf204  
TMEM237  
ARHGEF39  
CKAP5  
PPFIBP2  
RHAG  
WWC1  
CDR1-AS  
ADCY1  
RASAL2  
SLC44A2  
NDUFA9  
PROZ  
LIPT1  
ADAMTS8  
HMG1  
SCARNA8  
THAP1  
FNDC5  
UBQLN1  
ARF6  
ENOX2  
HOXC13  
LOC110283621  
UFC1

PPARGC1B

VAMP8

PSD3

HOOK3

ENPP7

HNRNPL

AKR7A2

GNA12

BMP5

THADA

TCAP

KCNJ3

KIF2A

MIR659

TMEM17

AP2S1

KIF22

PDCD5

ORC1

DFFA

ZIC4

BTG3-AS1

RASAL1

YWHAH

TRAF5

PLXNA2  
ATP8B3  
CBX5  
LOC102723566  
EBF3  
FBXL7  
COL5A3  
IATPR  
ADHFE1  
BAIAP2L1  
KIFC1  
WHCR  
NXF1  
UBE3C  
SLC27A2  
PFN2  
CPNE1  
IFNA17  
LRRK1  
RFC1  
PREPL  
NCF1B  
RAB3IL1  
ABI3BP  
ACO2

ZFPM1  
LMX1A  
MAP7  
CD37  
ODAM  
PHKG2  
UBTF  
NRXN2  
OTUD7A  
RBM14-RBM4  
YPEL1  
SNX9  
PPFIA1  
TRPC4  
ATP6V1B2  
ATG4A  
CRYGC  
KIF18A  
P2RX3  
RBFox3  
ADGRF1  
MARK2  
RNASEH2B  
SRXN1  
SPNS1

ZNF350

MESP1

ZBTB32

DCXR

EDIL3

RELCH

NPEPPS

PRCC

COA8

ORM1

COQ9

STOX1

DGCR11

NDC80

EPM2AIP1

LTB4R2

EIF3E

SKA1

INA

GSTM5

CNTF

TEAD4

RPS7

OBSCN

THOC1

NUP210

PABPC1

TRAPPC12

GRIK1

MYL9

TDRKH

SPDYE4

ELL

CCDC47

MAB21L2

AK9

GRIK2

TSSK2

EIF2D

KRT25

PCOLCE

MIR489

LINC01798

KDELRL1

GFM1

P4HA3

SIGLEC1

LTBR

NVL

ACER2

MAGED4B  
NR1D1  
TMEM107  
MEGF8  
SOAT2  
GABRG3  
LAPTM5  
EIF3B  
SERF1A  
NDUFA2  
NDUFAF4  
COMMD1  
ENSG00000206129  
APOC2  
FAM66B  
TRMT9B  
PNOG  
COX20  
ESX1  
KBTBD13  
FUT1  
COL24A1  
CSGALNACT1  
TSIX  
RNU12-2P

RASGRP3  
KCND2  
ARHGEF10  
SUMO4  
MBD3  
KLC1  
HSPBAP1  
SNX8  
AZF1  
IRX2  
MIR744  
OIP5  
TST  
CLIC4  
MPP1  
MAPKAPK5  
ZPR1  
ABCA5  
UCHL5  
TOMM40  
PRG4  
ATAD3A  
EPC1  
DCAF7  
MAGEA12



ING5  
TNFAIP8L2  
ARID3B  
PHF8  
ITIH3  
PFKFB1  
FKBP6  
CPLANE2  
SPESP1  
NADK2  
CRB2  
SUPT5H  
PLPP3  
SLC22A16  
CASP14  
GNE  
TUBB4A  
NDUFA11  
VASH1  
LMBRD1  
PCNA-AS1  
TIFA  
WDR45B  
H3C10  
SIRT5

MIR520B  
NAA40  
CCR10  
MIR1306  
DGS2  
BLOC1S2  
CHD1L  
ENSG00000249364  
NPNT  
HMSD  
SYMPK  
CYP4F2  
EP400  
PTPRN2  
LIPH  
PPY  
UBE2S  
TLX2  
TRI-AAT4-1  
TRS-AGA2-6  
TRT-AGT1-2  
CHMP2B  
TOR1B  
BLVRA  
CHPF

ST7  
U2AF2  
MOK  
VAMP2  
MIR133A2  
MEOX2  
LNX1  
PNLIP  
MIR493  
CSRP1  
ACAA2  
MNAT1  
COL8A1  
ACP6  
CST2  
PRR16  
PGPEP1  
MYO10  
MPC1  
IFITM2  
CLTRN  
PIGQ  
IL20  
EIF3I  
BHLHA9

GRIA2  
HLA-S  
CTSZ  
G6PC2  
LINC01567  
KCTD13  
RPL21  
MPP2  
ADCY2  
NAA30  
PTP4A2  
ATP9A  
DHX16  
GLYAT  
APCDD1  
PREX1  
ANKRD49  
CEP295  
CNNM2  
ANXA8  
ZNF408  
DOCK8-AS1  
GUSBP4  
GUSBP15  
YBX3

DTYMK  
SULT2A1  
ENSG00000203325  
ZBED1  
NCKIPSD  
TMEM260  
INO80  
CLIP3  
RAPGEF4  
ARHGAP45  
PDE3A  
CPA5  
HOXB6  
SGCB  
CNNM1  
LINC01538  
MIP  
KALRN  
AMBN  
SMIM2-IT1  
LIPE  
SLMAP  
ANGPT4  
ATP9B  
PCDHA10

IGSF3  
CLPTM1  
VPS37A  
TTLL11-IT1  
ENSG00000250195  
USP2  
RPLP0  
P3H4  
GIMAP4  
USP39  
PDHB  
MIR194-2  
TMEM94  
NDUFB8  
CECR3  
UBA52  
LOC111365141  
BCL7B  
FAM111A  
DVL1P1  
ALG14  
MT-TE  
DEPDC1  
MKNK1  
ARFGAP3

SOX8

TRPV5

NDUFA12

SERF1B

CA5B

SLC25A15

NECTIN2

B3GLCT

FBXW2

LAMC1-AS1

DCPS

FAM230B

DIP

SLC51A

NCAPD3

DAPK3

ABCC10

UTS2R

COL19A1

TRIM27

KRT75

FABP7

ATG9A

CNOT3

NUBPL

MAGEH1

DLX6

MDM1

BANK1

EMP3

ENSG00000241269

LOC106728418

GOLGA2

SYNP02

MZF1

TRAM2

OR5AR1

COQ4

HIVEP1

SDHAF1

UCK2

DLEU7-AS1

ENSG00000249772

SLC37A1

ADAMTS18

PRRX1

ZNF41

SLC29A2

LDHC

TRAK1



PPP1R12C  
SECISBP2  
SUPT6H  
CFAP74  
SP8  
SRRM4  
TMEM176A  
DEFA3  
TUFM  
ATP6VOA4  
DPH2  
MYO1E  
NINJ1  
PTRHD1  
MTHFS  
RPL6  
B3GALT5  
TRIM65  
ZNF335  
GIMAP2  
DHX15  
H1-2  
ENSG00000280339  
MAGEA9B  
KIR2DS2

MIR649  
U2AF1L4  
GZF1  
GOS2  
SLC18A1  
DHRS2  
ASPA  
SLC25A25-AS1  
C11orf58  
HTR4  
PHB2  
ZC3H7B  
ARL4C  
MAMDC2-AS1  
ZDHHC2  
GSDME  
LAT2  
MGLL  
PGAP2  
BAALC  
LILRB2  
VGLL4  
RDH16  
LINC01762  
ENSG00000270659

TDGF1P3

HINT2

SLC6A11

NCR2

BEST1

EMC1

RDH5

MFSD6L

KCTD7

GNRH2

KCP

PRKACG

GMSD

TCTN1

GIGYF2

AMOT

MAFG

LINC00323

LINC00596

LINC01204

MFSD10

USP33

CBX7

HNRNPH2

RIMBP3B

MIR3618  
ENSG00000281530  
PPIF  
PRPSAP1  
TXN2  
PRM1  
KLF12  
RBFOX2  
ATP2B4  
CPZ  
ST3GAL1  
LINC00667  
LINC00929  
LINC01721  
MYHAS  
ARL6IP5  
ZFYVE9  
PLAGL2  
CDKN2D  
PSPC1  
AMOTL1  
CLMAT3  
KIF6  
SRR  
PKN1

ASPG

RBM14

MTMR2

NFASC

ANGPTL8

TXNL4A

DEFA5

STMN2

C1GALT1

AGBL4

ACER1

UCN

SLC30A10

PDE8B

ANKRD23

MUC20

MAC1R

UBE4B

SEMA3D

DEGS1

LINC01020

DENND2D

DNMT3L

CDK11B

TWF1

RPS8  
LINC01507  
SUB1  
PANK4  
H2AZ1  
ANKRD20A1  
MTHFD1L  
Clorf141  
BRAP  
ADCY8  
SLC22A1  
RASIP1  
TRIM13  
KCNK5  
TNNI1  
FLG2  
ASB14  
LCLAT1  
SP140  
RUSC2  
TRD  
PRKRA  
IRX1  
COA3  
ITPR2

FAM230A  
DGCR12  
LOC102724770  
ENSG00000224836  
LOC116309126  
DGKH  
CREM  
H3C7  
FIRRE  
NELFE  
OR6N2  
DGAT1  
FEZ1  
CIAPIN1  
SPAG5  
THSD7A  
ZNF582-AS1  
RGS22  
TICAM1  
MACROD2  
SLC17A3  
SARNP  
LGR4  
OTUD7B  
RPS18

PPP2R5C

C9orf78

DMWD

PURPL

RGS10

IDE

ZNF423

MYEOV

EFHD2

CAHM

DDX27

KCNQ5

MASTL

MRPL45

GFER

MIR508

NT5C2

ANKS6

LINC00659

ENSG00000248176

ENSG00000233251

ENSG00000256218

SUCLG1

MACROH2A2

VAR2



SYN3  
ABCA6  
ZP3  
RPP25  
POU5F1P4  
BAZ2A  
ZNF23  
VIM-AS1  
XPNPEP2  
STRAP  
GNPTG  
ACADSB  
ADAMTS12  
DNASE1L1  
HS3ST3A1  
GABPB1-AS1  
RCOR1  
MIR323A  
PLVAP  
TMEM87B  
HKDC1  
RIN1  
SSBP1  
ZNF804A  
PPP1R14A

GSEC  
NIPA1  
LRIG3  
PPHLN1  
GCNT1  
SLC35A3  
PREB  
OLIG1  
NRN1  
LIMS1  
SMPD3  
TMEM26  
XG  
ARHGAP15  
KERA  
MAPRE2  
MIR613  
NLRP13  
HOXB-AS3  
DCAF1  
PDE11A  
EXOC1  
CSAG1  
GNPAT  
MYO7A

ARPC1B  
HOXD3  
S100A5  
NKX6-1  
HERC5  
TAF1L  
H3C12  
FGF5  
LINC01617  
SLC38A3  
CACNA1C-AS1  
DPM3  
MIR448  
DLGAP4-AS1  
LYL1  
OTOF  
DCTPP1  
PPP2R2B  
ABHD11  
RAE1  
GALR1  
GML  
GSPT2  
EVX1  
FLAD1

AFAP1L2  
STK25  
MAPK13  
RPP38  
UPK3B  
SCGN  
TRAPPC9  
BST1  
C5AR2  
PTPMT1  
TMEM54  
HLA-DOB  
RAP1GDS1  
USP11  
GADD45GIP1  
CAPN5  
PUS10  
RGS9  
SNHG8  
KRTAP5-AS1  
VPS51  
PCBD1  
PAQR3  
HMG5  
DLGAP3

NIP7  
PDIA6  
PRORP  
RFX6  
MAPK8IP2  
INPP5K  
GAN  
RPP14  
MAML3  
RNLS  
SLK  
PPP1R3A  
SBDSP1  
NEU3  
CEP63  
ORMDL1  
NFATC3  
CKAP2  
RBM5-AS1  
NKX1-1  
ALMS1P1  
LAD1  
BCL2L2-PABPN1  
AKAP4  
OTP

MT1A  
IGFALS  
NIPA2  
HBE1  
KIF16B  
ANGPTL3  
HEPN1  
C10orf143  
RASGRF2  
MCM10  
IMP3  
FEV  
RPS9  
SORL1  
DPF3  
SLC6A8  
TRAF7  
KDM2A  
VMP1  
FAM83A  
SLC27A6  
MYH14  
PARP3  
INS-IGF2  
CLIC2

GRIK3  
PHETA1  
H3C3  
CACNA1I  
LAPTM4A  
CCNQ  
UCHL3  
MAML1  
MYBL1  
DSEL  
SLC5A4  
CCHCR1  
SYNGR1  
H3C11  
COG3  
KLHL10  
EEF1D  
CYP26C1  
DEFB104A  
HCLS1  
MOS  
INPP5J  
CYC1  
KIR2DS1  
OIP5-AS1

MLF2

ELM01

PPP1R13B

NDUFAF6

MIR488

HOXC10

MAN2C1

ATP8B2

ARL6IP6

KCNAB1

DELE1

ZFPM2-AS1

GBF1

EAPP

ENDOV

CENPC

CRPPA

NBPF10

MIR630

PDK2

SIN3B

SLC39A7

SETD1B

SLBP

SEL1L



H3C8

MAZ

LINC00365

EPHB1

PIGF

KLHL3

RAB2A

EGR3

CCT4

MED10

MCOLN1

ZIC5

RSP03

WWC2

FAR1

SCIN

SCHIP1

MYBBP1A

BMP8B

TRIM63

UAP1

LY6D

RAPGEF1

SIM1

TONSL

ACAA1  
DCUN1D3  
FBX032  
RSL24D1  
L1TD1  
MIR601  
GPT2  
IL17RE  
KIR2DS5  
KREMEN1  
PPP2R5D  
H3C6  
KIF12  
COCH  
PNPLA4  
DDX52  
PLXND1  
FTMT  
CCDC180  
FAM149B1  
FOXN3  
LOC105371046  
BRWD3  
PRKAR2B  
GRIK4

EXPH5  
NLGN2  
UBE2M  
MEF2A  
SPRR1B  
ENSG00000228082  
TICRR  
SLC44A3  
PIIP5K1  
YARS2  
FAM160B1  
MFAP4  
SLC26A6  
PIKFYVE  
PSME1  
OAZ1  
ADCYAP1R1  
ORAI3  
LMCD1  
TRIM66  
OMP  
LRP12  
NUDT10  
CEP70  
NDUFA10

LRPPRC

EEA1

NR2F1-AS1

PDK4

PPT2

CRIP1

RLN1

HIPK1-AS1

NCBP3

MROCK1

ER01A

ULBP1

BMP2K

PAICS

STX16

DBI

ABCD3

FSIP1

SGMS2

STX8

SLC22A23

MMAB

ENSG00000288380

AIG1

GABRA6

ZNRD2  
SEMG1  
BRF2  
FBX07  
COP1  
CENPH  
CD160  
KCNQ4  
HOXC4  
SLC4A3  
H2AC13  
MIR660  
CLDN14  
OR51B5  
LINC02223  
ENSG00000257241  
HTN3  
MYH1  
HTR3C  
SERPINA5  
STARD10  
MFAP3  
NRG3  
GALNT14  
MAP1S

RAB11FIP1

DNAJB6

SEMA7A

AGPS

SLN

SSBP3

SYCP1

POLDIP3

MACROD2-AS1

RAD51AP1

PPM1F

GRB14

RPS2

TSPEAR

VPS11

CFLAR-AS1

KIF23

PLD3

NDNF

PRDM9

PPP6R3

MTURN

TNS3

RPL32

PRH2

CGAS  
ENSG00000237588  
ENSG00000260196  
SEC63P1  
ENSG00000266680  
DBH-AS1  
CTU2  
IDH3A  
PRH1  
THAP3  
PDE10A  
RIPPLY3  
NDUFA4  
LINC02157  
PTTG1IP  
PPA1  
UBE2V1  
PRPF40A  
SLC37A3  
RIBC2  
FGF16  
RHOF  
FBX028  
ALX1  
PDLIM2

ITGB1BP1

GIPR

LOC106627981

WHAMM

H2BS1

CYP26B1

ABALON

FAAP100

ALPK1

SETD7

FPR2

PIMREG

SLC01C1

STK3

KCNH7

ITGAD

ARHGEF6

KCND1

AP5Z1

CASC4

OR51B6

HNRNPAB

CUX2

HAS3

HOMER1



RPP21  
VLDLR-AS1  
FGL2  
RPL26L1  
SLC25A3  
SSX5  
AMZ2  
GSDMA  
GINS2  
CLPP  
IL1RAP  
OPRL1  
USF3  
PDE4DIP  
PLXNA1  
DHRS3  
OR3A3  
SMG1  
PPP1R12B  
GLYCTK  
RAB4B-EGLN2  
TRAPPC6B  
HOXA@  
CD93  
EPS15

ARFGAP1

FAAP20

RGS12

NAV1

GJA3

RNMT

GALR2

OR51E1

SHANK1

PRSS16

LINC00665

GBP1

KRT34

ERBIN

TFAP4

FAM193A

ARCN1

TSN

RPL37

NMRAL1

LRPAP1

INSIG2

PDZK1

NBPF3

C8orf34

SLC6A6  
APBB1IP  
SLC30A4  
C19orf33  
TULP1  
WASH6P  
EIF2B4  
LAGE3  
URB2  
SACS  
IFNL1  
CEP41  
UPP1  
PTPRS  
ZSCAN9  
RORB  
LRTM1  
MTNR1B  
PHKB  
PCTP  
MAPRE3  
GDE1  
OTUB1  
TRIM59  
TPPP3

MPZL1  
TNIK  
APOBEC3A  
TSPAN1  
LOC110011216  
PDIA3P1  
ST8SIA1  
MAP2K6  
LETM2  
DNMBP  
CCS  
FOXJ2  
CCNY  
SPTBN4  
ORC4  
C2CD5  
NR2F6  
KLRC2  
HES6  
EXOSC5  
SEC14L1  
IK  
SLC26A3  
MDH1  
CDH6

POU2F2  
ANKRD36B  
CST7  
PPP1R10  
GGA2  
CNTFR  
SLC15A2  
ITGBL1  
TUBGCP6  
HAGH  
ZNF718  
ZNF771  
LOC107982234  
PHBP1  
SLC6A1  
JPH3  
SLC9A4  
SLC01A2  
INTS11  
SPIDR  
MTMR14  
TTBK2  
COL22A1  
TNFRSF21  
LARP7

COL23A1  
ASIC3  
EIF2B2  
TRIM11  
OTUD6B  
KCNK2  
IRX4  
GTPBP3  
POLR2G  
SRSF7  
IFN1@  
OLFM1  
POLR2I  
GYG2  
CAMK1D  
SERPINB7  
PRKAG1  
GRIA4  
DHX36  
SLEB3  
VCX  
UBE2D3  
ARC  
ZNF546  
APOBEC3H

WASHC1

ENSG00000250899

HTR7

PMM1

MED25

SRM

NFYA

TAF11

HOXC8

SHARPIN

TMEM87A

ZNF141

TDRD3

THOP1

SLC8B1

H2AC16

ZC3HC1

ASMT

EDC4

PSTPIP2

ATP5MG

P2RY1

FAM53B

B4GALNT1

RBMY1A1

ARHGEF11  
BCCIP  
GDF9  
IRGM  
DDA1  
CREB3L3  
ME1  
LRRC7  
SEMA5B  
AFF3  
FOXR2  
CCDC7  
MTRNR2L8  
PPM1B  
TPTE2  
SYNJ2  
DAZAP1  
PLAAT1  
NHS  
UBE2K  
SQOR  
TSFM  
LOC107133509  
CREB5  
PCNP



GCKR  
SLC25A46  
TTC36  
IGBP1  
PSPC1-AS2  
DCUN1D1  
MIR7-3HG  
RDM1  
PCMT1  
POPDC2  
DLG2  
PHKA1  
MIR374B  
MIR421  
TUBGCP4  
DPPA2  
PITPNA  
GCN1  
JPX  
APOBEC3F  
DYNLRB2  
PPP2R5E  
UQCRC2  
DDX4  
BTF3

WIZ  
PLCB2  
CA3-AS1  
DIS3  
PLAC4  
TNKS1BP1  
SLC12A7  
PGAM5  
UST  
YIPF5  
RAB9B  
COL6A5  
PDLIM4  
TMEM79  
EFNA5  
MUC17  
MOCS1  
TMEM185B  
HLX  
XCL1  
USP17L9P  
PHF14  
KIF21A  
TMEM51-AS1  
FBH1

ATOX1

FXYD6

ABCF1

SCG3

CBX2

LINC02231

DAP3

COX4I1

ABCA2

DNAJC3

HCG15

PREX2

LINC00970

AK1

SC01

POFUT1

LINC02098

FAU

ANKS1B

XP07

TMEM33

TIMM13

WDFY3

CELF4

GMPPA

CARMIL1

HS3ST2

RASSF10

PCSK5

CLIP1

MSANTD3

GIP

CHI3L2

CDK5RAP1

THSD1

KDF1

HSF4

PIK3C2B

STYX

ADGRF5

CASC23

TRIM32

DDX6

GATA2-AS1

AMPD3

SLC25A10

RPTN

GPR15

CIAO1

TRPM2

SERPINA10

ZNF350-AS1

PRKACB

EXOC6B

MRPL44

BRAT1

MCTS1

RNF13

RGS14

PPP2CB

GSPT1

CXXC1

RPS11

TBCK

CSRNP1

LRATD2

SFXN4

LIAS

HAT1

TRIM5

AKAP6

TFDP2

KIFC3

RHOT1

DDX10

MIR1247  
ADH1A  
TGFBRAP1  
COLEC10  
SLC25A27  
CAPZA1  
CEP135  
FAM83A-AS1  
P2RX5  
ILDR1  
CCL28  
LINC00926  
TDP2  
OPHN1  
GIHCG  
ADAM11  
EMILIN1  
FRG1  
B3GALT6  
GPC3-AS1  
ATAT1  
ZNF281  
CDH12  
CDKAL1  
RABGEF1

LINC01193

ABCG4

BDH1

TINAGL1

PDLIM3

MIR365B

ARHGAP11A

ASH1L

GCNT2

NOX3

PCDH12

KIR3DL3

TRMT1

SAMD12

KNOP1

CD180

CCDC8

CCDC85C

EIF4EBP2

FIGNL1

LINC00328

ZNF428

GFM2

NEU4

PRAP1

TCP10L  
ST13  
TNFAIP1  
APOBEC1  
WASH3P  
PLIN3  
RGS11  
LINC00173  
TMEM45B  
CACNA2D3  
PPP4C  
RBMS2  
PKD2L1  
ANXA10  
CRLS1  
GPR108  
AVEN  
PCDHGA5  
PLPPR5  
SEMA6A-AS1  
ZNF721  
LY86  
CAND1  
MAPKAPK5-AS1  
GPR143



BATF  
GANC  
CPB1  
GPIHBP1  
IL1RAPL1  
MIR652  
ALG8  
PIGK  
PFKFB2  
MXD4  
H1-4  
LOC106014249  
ELOA  
CDH9  
KPNA5  
AKAP17A  
ISCU  
TMEM18  
GOT1  
ENSG00000228363  
CPSF1  
ANKRD50  
YBX2  
ACTRT2  
TFPT

MTF1  
GPD1L  
PRR26  
UPK1B  
GRM4  
FRRS1L  
TSPYL1  
LINC00383  
RGS20  
MIR3671  
ALAS1  
EVA1A  
INPP5B  
CLEC4A  
KRI1  
USP18  
SEC23A  
ENOSF1  
PUM1  
NCKAP1  
TDG  
TEAD2  
CLPX  
ZBTB38  
MIR449B

UBE2B  
SLC17A7  
PMF1  
HERC4  
RNF216  
CTNNA2  
SCARA3  
BTBD7  
LINC00589  
AP1S3  
ARMC9  
XYLT1  
JCHAIN  
POTEF  
PHOSPHO1  
MRPS26  
FBP2  
SESN3  
MBLAC2  
BAIAP2-DT  
CGGBP1  
EIF2B5  
LSINCT5  
ENSG00000145063  
PRPH2

FAM149A  
MTO1  
IMMP2L  
ARID4A  
USP48  
RUBCNL  
CASC6  
CEACAM4  
LINC00974  
OTOGL  
USP9Y  
TRMT5  
TMEM138  
LOC105369388  
SHMT2  
TPST1  
SHROOM3  
TSPYL5  
UPF2  
ARSJ  
COPG2  
HORMAD2  
HAP1  
KLHL2  
TRNP1

GJD2  
THOC2  
HIVEP2  
TIMM10  
PALM2AKAP2  
TEX28  
TBC1D1  
SEC16A  
FXR2  
EDA2R  
SLC25A47  
LYPD4  
EID1  
LYSMD3  
RTP2  
HTR2A-AS1  
CCND3P1  
ZNF346  
UBE4A  
ETAA1  
BAAT  
DGKG  
FCAR  
LRRC1  
MYOF

MIR153-2

GPR180

MPZL2

ANO2

OXR1

TREML1

XPR1

ELM03

TCTA

HRDL2

SEMA4G

ELK4

SIGLEC7

SLC16A2

MBOAT2

DOCK4

NOC2L

IRF2BPL

TTC4

TMEM132D

LINC01018

ENSG00000258711

ENSG00000279159

RRS1

AHSA1

MIR519D  
GABRA4  
SLC30A2  
CCL16  
GALNT17  
ZNF674-AS1  
FTSJ1  
KCNC1  
ENSG00000258798  
CHCHD4  
GTF2E1  
KIR2DL5A  
TEPSIN  
ITPRID2  
COX18  
INSM2  
PGBD2  
ONECUT2  
PRSS23  
FXD7  
BMP3  
BCKDK  
SRPK2  
SMARCD1  
MRAP2

EN1  
GLT1D1  
GUCY2D  
C12orf4  
MRPL12  
CAMSAP2  
RABEP1  
EIF4G3  
BABAM1  
ARHGAP18  
C2orf49  
MIR612  
MMADHC  
RTCB  
FABP5P3  
MBNL2  
PNISR  
ZNF292  
MINCR  
DGKA  
YKT6  
MIR188  
EZH1  
ULK4P2  
ENSG00000259488



ENSG00000272953

COG5

SLC1A6

PPP1R7

KIR2DS3

CACNG3

NDRG3

TCEA1

NPM3

ARFGAP2

CC2D1A

JKAMP

ETNK1

NUP43

PTRH2

HOXB8

WASF4P

H2AC12

ROB03

P2RX4

STIM2

HA01

FGFBP1

CDC42BPA

TIMM29

XCR1  
ENSG00000202498  
CXCL1P1  
NCAPG  
AQP10  
SNX5  
ADAMTSL4  
NSMCE4A  
LOC100506321  
COX8A  
WASF5P  
ACYP2  
ZWINT  
DOK4  
SPACA4  
ERGIC1  
GLUD2  
FOXO6  
NT5C  
NEUROD2  
ALG10B  
KIN  
RUFY1  
GTPBP10  
WDR4

CAMK2B  
HLX-AS1  
KIF13A  
LINC00601  
PERCC1  
LDC1P  
ENSG00000265778  
COX17  
ASGR2  
ZFAND4  
SLC41A1  
CAPZB  
ZNF587  
SOX14  
STRADA  
PPM1A  
PHF1  
SRP14  
EIF3F  
ARHGAP32  
WHSC1L2P  
NAP1L1  
ZNF672  
ADH6  
PRM2

TMEM189  
GAL3ST1  
BCAT1  
MIR384  
OMD  
INIP  
DEFA4  
LOC108167315  
CLCNKA  
CADM2  
UQCC2  
KAT7  
GAGE1  
CIA02B  
CHPF2  
CT47A5  
DPPA3  
TKFC  
TENT5C  
ZNF496  
MED23  
KRT2  
FBXL2  
TMEM240  
CDRT15

NUP35  
SPC25  
MC3R  
MDGA1  
PPP2R3A  
INTS7  
PLAAT5  
PSMB6  
LIPF  
CDH24  
MAP10  
ZFAND6  
STX10  
TFB1M  
GET4  
GUCY1B1  
RLBP1  
CALML3  
AMN  
UCMA  
AP1B1  
P2RY11  
RHBDD2  
SLC25A2  
GSTT2B

TAPBPL

IMPA2

ZRANB3

EIF2B1

PAPSS1

JPH4

DUSP2

DPP7

SPIN4

C4orf48

ZNF595

GYPE

CAMK2A

MYO18A

MYL6

MUC13

GTSE1

IGSF10

NRCAM

MAPK8IP3

LINC00290

AP3B2

FGF22

COG8

KIAA1324

MYBPH  
CNNM4  
SACM1L  
AQP8  
SULT1C2  
ARHGEF9  
POP5  
WDR1  
ENC1  
CYP4F3  
RALGAPA2  
XP06  
TMC3  
IGHG3  
AHCTF1  
CREBL2  
TMEM126A  
TSPAN2  
PRRC2C  
CIT  
HLA2  
MIR5190  
LDLRAP1  
GPRC6A  
ERCC6L

GRAP2  
WIPI2  
EPHA6  
LOC108281177  
SMCP  
TRIM7  
GBGT1  
SIVA1  
IFI30  
NCAPH2  
ZNF417  
CENPS  
RNF20  
ABCB10  
PHOX2A  
LOC106780803  
PRKAG3  
STK26  
SNAP47  
MMP20  
LEPROT  
SPSB1  
SNURF  
DLGAP1  
GNG2



PHC1  
KLRB1  
SYCE1  
MAST2  
VPS16  
LCORL  
MFSD2A  
GPR50  
PPP1R3D  
EIF2A  
DES-LCR  
EPS8L3  
PHLDA3  
PPP1R3C  
RFLNB  
ELOVL5  
TRIP12  
NAGPA  
MRTFB  
ATP2A1  
TMEM98  
NEK7  
SYN1  
MIR539  
GPAT3

CCDC88C

DOK2

ENO3

CNOT9

H1-5

EDC3

MROH7

NUSAP1

DAB1

C16orf58

NDEL1

RPL36

FBXL3

TRMT61B

ADD2

LMLN

MS4A6A

CMTM3

SMG6

ATAD3C

KMO

KCNC3

ARHGAP5

TNRC6C

PAPOLG

PABPC1P2

ENSG00000255174

LOC100421446

ENSG00000224410

LOC106627982

SLC05A1

DNAJC30

TSPAN9

KCNJ12

ZNF236

ATP6V1C1

DEXI

FOLR3

NMNAT1

MCCC2

SPRR1A

ATCAY

MCF2L

FYC01

CATSPER2

MED18

SMCHD1

HCN2

RAPGEF2

TEFM

MRM2  
P2RX2  
PRDM12  
INPP1  
UBE2QL1  
RSP04  
MT1X  
MAP6  
FREM3  
IRGC  
AFG1L  
TULP4  
ZHX1  
ADAMTS15  
EHD2  
TCFL5  
ZNF444  
GPAA1  
PLEKHB1  
DEF8  
RP1  
BICD1  
CAMKMT  
SNX3  
ZC3HAV1

ZFYVE16

NTSR2

MRGPRX2

EPN3

AK3

SLC13A3

PTPRR

DLX3

ZMYM5

MAP9

HEG1

COL25A1

HOXD8

GJD3

CEP72

NFKBIZ

STAM

C3orf36

AAAS

IMPA1

DENND11

EIF5

EFR3A

PLP2

LIPT2

VPS13D

RPF1

SLC43A3

TIMM50

GALNT6

ADPRM

POU4F2

ADAM22

ATAD5

ARHGAP4

GSDMD

KLHL12

HIBADH

ZC3H11A

FERD3L

CDH19

FLRT2

ANKHD1

BCL6B

TFIP11

SPATA33

ANXA2P2

VWA1

PRR14

ARHGAP11B

PRND  
GLIS1  
SRPX  
CDH16  
MOSPD2  
NT5M  
MAP4K2  
TMPRSS5  
PHPT1  
MED17  
DDHD1  
KDM4D  
ZSWIM2  
CLEC5A  
ANGPTL6  
MARCHF6  
APEX2  
MED28  
GNG7  
MAFA  
BABAM2  
TMF1  
CDK13  
ACSL6  
POLDIP2

STAG1  
EXD3  
IL17C  
FUCA2  
PLSCR3  
TOR3A  
COPS2  
SALL3  
DBN1  
SETD4  
KDM5D  
EXTL1  
EBI3  
EMX2OS  
IP08  
SERP1  
TIPIN  
SCN7A  
PRICKLE2  
RPL30  
EIF1AX  
SLC22A7  
ANAPC4  
FSBP  
MIR576



MC5R  
RAB10  
KCTD12  
AP4B1  
ACSF3  
SLC25A17  
TPK1  
SCLY  
UBA5  
PDRG1  
MIR1266  
MIR548C  
CYP21A1P  
SPOCK2  
CBX8  
SPR  
AUH  
RYK  
NYX  
BCL2L15  
MARCHF9  
KCNE4  
MUC15  
KCNJ16  
PCDH17

HSD17B14  
ASXL2  
KIR3DS1  
LINC00525  
LOC108254682  
GRIK5  
GTF2IRD2B  
GLRX5  
NSMCE2  
TNIP2  
SCARA5  
LOC108961161  
TMLHE  
ARHGEF15  
TYSND1  
DDX28  
TBCC  
PKD3  
AQP7  
MYO15A  
EML2  
IARS1  
COA4  
INTS9  
KRT78

ADGRA3  
H2AW  
ZNF143  
SNORA80E  
CEP350  
SLC37A2  
PHF20L1  
WDR97  
SDCBP2  
SOWAHB  
YDJC  
GTDC1  
NASP  
MAMDC4  
SUGT1  
EML1  
METTL16  
WARS2  
NUDT19  
DBP  
POLR2F  
SRD5A3  
LHFPL6  
LRRC2  
ANAPC10

RASSF4  
HRNR  
IFNL4  
TIMM8B  
CRTC3  
TRIM52  
OR1E2  
CBLC  
MIR616  
SMARCAD1  
TENM4  
TICAM2  
ESYT1  
SFTA2  
PTBP2  
STAG3L1  
PSMB10  
MIR431  
BTN2A1  
FAM221B  
IGHG2  
ADAM2  
C22orf15  
RPS5  
VWCE

RPP40  
KCNE5  
VPS39  
EIF5B  
CPSF6  
LHPP  
ZNF622  
PRNT  
UTP23  
SSX2B  
MARF1  
FAM172A  
ILVBL  
ATP2B2  
PCK1  
LUZP1  
ANKRD13D  
PCDHA6  
DIP2C  
ACTN3  
EME2  
NCAN  
RNF115  
ZNF276  
NFE2L1

TPTE

LOC107980440

ZXDC

CNOT6

EPHX3

TRIP6

MIR492

CH25H

TNRC6B

PHF21A

SPTSSB

CYP2C18

MIR589

SV2C

STAG3L4

ACAT2

PDZD7

CHSY3

PIP4K2A

ASMTL

SYNDIG1

PET117

RILP

LAYN

H2AC17

NCOA5

KATNB1

HOXC6

GATB

CD200R1

TBC1D8B

KLRG1

MGAT3

PPP2R5A

MED13

DNHD1

CLLU1

CDC42BPG

SLC28A3

GNAT2

RTN3

TOP1MT

OPTC

FAM170B

GLTP

DOCK9

SLC9A8

SBSN

DMC1

POTEE

TCEANC2  
C11orf45  
PRPH  
ODF1  
CMTR2  
AKAP1  
GALNT13  
SUMO2  
PCDHGB2  
NEURL4  
GNAZ  
ENSG00000212411  
CDC123  
NSUN5P2  
CA3  
ACOT8  
SLC30A6  
MED30  
TJP3  
SP011  
GMCL1  
ZNF652  
STX18  
PI15  
TUBGCP5



NAPB

NRON

FRMD4A

TBCA

PYDC1

IPO11

VSTM4

BRD8

IL31RA

H2AC1

AIFM2

CRB1

PTCD3

PNPLA5

ANAPC2

PCDHGB7

SLC38A1

H2AC8

PLAA

IMPACT

ATP23

TM9SF3

PLPP4

KCNJ4

ATG2A

BTBD16  
CACNG2  
RAI14  
UCN3  
CCM2L  
TVP23B  
CDRT1  
ATP6VOE2  
SNX27  
MTARC1  
COX7B  
ASPN  
PRELP  
NMUR2  
STRC  
SIKE1  
CHST5  
SLC13A2  
NCS1  
DUSP22  
MTMR11  
CEP104  
CPT1C  
TM2D3  
SLC17A8

WIPI1  
HOXB1  
AK5  
DNER  
SEMA6B  
HGD  
B3GNT7  
SETMAR  
SOCS7  
PDE6A  
PALM  
MBNL3  
CTDSP2  
COL6A6  
CASP8AP2  
CIDEA  
RCN2  
CDH20  
NINJ2  
TMEM165  
PIGP  
DLX2  
LEMD2  
ARHGAP27  
UGT3A2

RAVER2

TRIM74

SLC22A8

NPIPA1

LOC107303337

LOC107303339

LOC107303341

KMT5B

KCNIP2

GZMK

CNNM3

TUBA3C

ACSS2

EBF2

UPF3A

ATF5

CLPS

PET100

STXBP5L

ETFBKMT

TMC2

NSMAF

ACTBL2

SH3RF1

B3GALNT1

PAFAH1B3

NDUFA8

CEBPZ

ADRM1

ZNF589

DOCK3

PATL2

HOXD9

ERI1

FNDC4

PDC

KCNQ1-AS1

COL16A1

METTL27

ECE2

NDUFS5

SLC41A2

NAA11

UBASH3B

VAX2

SCUBE1

CHST15

TIMM23B

SLC38A5

OSTF1

TAMM41  
GALE  
UBAC1  
LELP1  
VPS18  
C1GALT1C1  
RHCG  
NUFIP2  
RGS13  
ATOH7  
SEMA3F-AS1  
TLK1  
ARMC2  
TRAM1  
RPS4Y1  
ZBTB18  
DMGDH  
MIR1181  
TUT4  
ADAMTS9  
GPC2  
PLIN1  
NEUROG3  
AGBL2  
SAE1

SARS1  
MIR939  
LINC01108  
OTUB2  
ECEL1  
LOC107303342  
CCNJ  
PPP2R2C  
SPRED2  
CNTN4  
HRC  
POLE3  
TFB2M  
AARSD1  
RCC1L  
ARL2  
ZNF331  
LOC100505549  
SAR1A  
MIR3651  
RPA4  
CDC16  
ICA1  
OSR2  
ELM02

NMUR1  
STX17  
COX6B2  
CRYBG1  
CA10  
SLF2  
ST6GALNAC2  
NFX1  
UGT2A1  
STK19  
KIR3DP1  
BARX2  
AKAP2  
BCL7A  
ZDBF2  
ATPAF2  
CAPN12  
KIRREL1  
FAM91A1  
LOXL3  
IGSF9  
CERS5  
NACA  
NEXMIF  
NSUN7



NCAPD2  
CHML  
CYTH4  
HS3ST3B1  
SPAG7  
VNN2  
SF3B3  
TIMM23  
NKTR  
SNTG1  
RAD1  
PDE4C  
TCEAL4  
SPIRE2  
SNORD138  
NUDT16L1  
LILRB4  
OSGIN1  
TMEM184C  
DSG1-AS1  
RNF41  
NME4  
NBPF11  
GABPB1  
YRDC

RAB9A  
TCEANC  
PIGB  
LINC01094  
RGS8  
TRIM35  
CADPS  
BMF  
SPDYE12P  
DOP1A  
IDI1  
SEMA6D  
SCAF8  
CYFIP2  
PCDH11Y  
SNRPC  
TBPL1  
TAF12  
PLEKHG2  
ZCCHC14  
ITM2A  
S1PR5  
TCF4-AS1  
SAMSN1  
GALNT2

GPSM1  
ODF2  
SIGLEC9  
KATNAL2  
DNAJB8  
IDH3G  
TMBIM4  
EVI5  
SDR16C5  
MRGPRD  
RNF217-AS1  
NSUN5P1  
TEX15  
PISD  
NDRG4  
CSTF2  
FAHD2A  
MBTPS1  
UNC80  
CRIP2  
MIR1269A  
GET3  
TSKU  
PEX5L  
COL15A1

ORMDL2  
ZNF500  
SSR1  
MOCOS  
RANGRF  
DHX58  
FAM3B  
RNF123  
PRPS1L1  
ALDH16A1  
CSGALNACT2  
FANCD2OS  
KRT85  
FAM83D  
GTF2IP1  
SH2D1B  
ETF1  
ARHGEF16  
DRAM1  
PPP4R2  
NEUROG1  
HHIPL2  
HVCN1  
SHISA3  
TRIM71

AHSA2P  
ACOX3  
DDI1  
NICN1  
CITED4  
VPS37D  
PPIH  
SNX11  
FCSK  
CWF19L2  
LOC108021846  
TIMM9  
DLG1-AS1  
CDYL  
AGAP6  
TMEM199  
ANKZF1  
FHL5  
SLC7A10  
DSCAML1  
NELFB  
NAA35  
MOB4  
DIAPH3  
DDX3Y

TP53RK

PYCR2

DHX33

GNB5

PNMA8A

CDC42EP1

PDCL

LSM12

APBA2

NIPAL1

SPART

DEGS2

GTF2IRD2

EVI2B

ATP6VOA1

ZP1

LENG1

DNAJC13

EGR4

ELMOD1

EMC8

SLC6A13

KANK3

DGKK

STAG3L3

DOK3  
PWWP2B  
HSD3B7  
MIR3127  
GPRIN1  
FITM2  
HLA-F  
RAB11FIP3  
FSTL3  
WDR6  
CD53  
INPP5A  
SUN1  
LILRA4  
TSEN34  
BAG5  
MDS2  
CDH18  
LNP1  
PLEKHG4  
KRT71  
GTF2IRD2P1  
DAP  
GBA3  
DNAJC2

SEPTIN12

MTERF1

NGDN

PRDM4

ATP13A4

NAXE

NAA20

ST2

HDAC11

MRPL37

MRPS18C

TEX101

PTPN5

SLC52A1

ATXN80S

CTBS

OCEL1

SPTSSA

MSL3

PLEKHG4B

NDST1

MSRB2

WDR72

SLC23A3

GGA1



GLRA3

FBX042

ERP44

CABP1

FMN2

RALGAPB

TDH

RLS4

PIGM

ZNF189

CDH7

CYP2U1

SPATA13

GPR173

MIR548AA1

SLC13A1

FER1L5

DTWD2

FM04

HIVEP3

KIR2DP1

ADGRE2

LYRM7

MAN2B2

PPIC

GALNT1  
DRICH1  
FAM9B  
PRPF38A  
TM4SF20  
MINK1  
SV2B  
TSHZ1  
SLC16A10  
IQCK  
THRSP  
ESC01  
POM121C  
RIC1  
ATRN  
STRN3  
MYO1A  
PTCHD4  
PKD1L2  
MTMR9  
WEE2  
THEM5  
LRRC37A  
SLC9A2  
PPFIA4

SLC9A9

FLG-AS1

TCF19

ALG10

INAVA

SLC22A11

FUNDC2

ARHGAP28

CCDC181

NUTM2B

MT1M

ECSIT

CCSAP

TMC4

MRPL36

CNN2

SIAH1

DNAH3

FGF12

ATPAF1

PEMT

IQUB

ENGASE

RHOQ

GPM6B

ZNF526

UXT

MIR1260A

EMILIN2

UBXN1

MIR450B

LINC01260

TD02

ZG16B

ZW10

TSHZ2

HILPDA

FRMPD2

PLXNB2

CASTOR3

MKLN1

SNX13

PDCD2

YPEL5

TECTA

RASD2

CISD1

DPYD-IT1

FBX05

PGAM4

TMEM248  
FBX09  
CLPSL2  
MS4A4A  
PRMT3  
ARHGEF40  
LOC107963955  
SLC17A1  
CYP8B1  
ZNF547  
CRYM  
COX11  
EMB  
LMF2  
ANKRD31  
VPS4B  
PLCXD3  
SCN1A-AS1  
GLB1L3  
SMIM30  
RAB3D  
TRIM73  
POTEJ  
DMRTA1  
SLC30A5

SLC26A8  
TMEM233  
DNAJC9  
ZG16  
ATP10B  
LINC01185  
CLEC1B  
ZNF410  
HINT1  
MTHFD2L  
INTS10  
ZCCHC7  
CAPS  
LRIT3  
PKD1L3  
RIMS1  
SULT4A1  
ART1  
TRIM62  
TMEM30CP  
GABRR2  
SPINK9  
CMC4  
TMEM270  
UBFD1

ERG28  
ACSBG1  
STRADB  
PGRMC2  
TUBB8  
OSGEP  
TOMM22  
SWAP70  
CCDC50  
TGM7  
CADM4  
LSAMP  
HMBOX1  
SLC39A12  
ZNF665  
ACAD8  
FBX031  
ZFYVE21  
CYB561  
SPATA46  
SPDYE1  
ENTPD3  
SMTNL2  
TRAF3IP2-AS1  
CLEC4G

PTPN4

ALKBH2

KLHL22

ERMP1

LINC00922

MFSD12

TMPRSS9

GTF2IP4

KCNT2

MBTD1

GJC3

GLRA4

ST6GALNAC3

DYNLL2

MAPT-AS1

TMEM63C

NECTIN3

CACNG1

HSPB3

EBF1

TSEN2

CRYZL1

AARD

HOXD12

PRSS12



SNRNP25

RHPN2

AQP6

FAM155A

AK8

SWI5

SPATA5L1

AZIN2

ZNF385C

L3MBTL1

NKAIN2

LIMS2

ZNF3

IMMTP1

FOPNL

TANC2

HPD

COL21A1

GABRE

IGSF1

MSBP2

NTNG1

TTC7B

RSC1A1

TAF13

CIB2  
SH3BP4  
CYTH3  
DFFB  
FABP6  
ZNF671  
C7orf25  
ANKRD46  
CMAS  
RND1  
SEMG2  
LRRC37A3  
C21orf91  
DHX38  
KCNJ15  
SLC36A1  
MRPS9  
ADAMDEC1  
SSH2  
PUDP  
DGKB  
FIS1  
DDRKG1  
ORC5  
RNF207

CERS6  
ITIH2  
EIF4HP1  
ATP6V1H  
THCAT158  
ATP10D  
MIR551B  
MPP3  
TRIM50  
NDUFAB1  
MYH15  
ACOX2  
TAF4  
MIR631  
CUTC  
GZMM  
C16orf95  
KRT77  
ZMAT2  
CRYBB1  
PKD2L2  
LINC01546  
PPEF2  
FAM186B  
ZFC3H1

PAQR8

APOOL

C11orf49

H2AC4

TAS2R64P

DPYD-AS2

GGT5

LINC02694

TIMM10B

MKX

NAA60

VAX1

TAS2R46

SEPTIN6

CADM3

KCNMB3

COX5B

RXYLT1

CYP4V2

CCDC33

IL22RA2

TADA2A

HERPUD1

NOBOX

NFS1

THOC5  
TENT5D  
CLUH  
MIR639  
HPCA  
GADL1  
GPR137B  
NAT16  
SULT1C3  
AKAP7  
KCNG1  
KLHDC7A  
POLR2C  
ZNF577  
HERC1  
INTS2  
ME3  
ETFRF1  
TRMT10A  
UMODL1  
CHST9  
ZNF446  
TMEM47  
CKMT1B  
ZFYVE27

MCF2L2  
DCAF5  
CCER2  
CRADD  
ZNF713  
ANO9  
BRI3  
PCNX2  
DNAJC15  
TMEM128  
KHDC1  
DPYD-AS1  
SLC25A32  
TLK2  
POGK  
SLC35G5  
ENSG00000277767  
ZNF22  
KBTBD8  
ZNF697  
PCARE  
ASF1A  
RBSN  
FAM222B  
ANKRD12

WIPF2

HNRNPUL2-BSCL2

ZC3H14

MAGI3

GALNT10

NATD1

NDUFAF7

DLGAP1-AS2

TMX1

CALHM1

USP5

OVGP1

CISD3

EIF2S3

CADPS2

TRIM36

SYDE2

LINC00271

CCNK

ZDHHC9

SNORA59A

LINC01152

LOC107303343

MSH4

SLITRK5

MAT2B  
RFT1  
SETD9  
TECR  
ANKFY1  
SRPRA  
CNOT11  
PLSCR5  
PDK3  
TMEM59  
STX12  
CEP192  
AGBL3  
STAU2  
OTOG  
CRBN  
HRCT1  
ANKLE2  
LOXHD1  
PECR  
KNSTRN  
ITIH1  
AP5B1  
BCDIN3D-AS1  
ZPLD1



SPIRE1  
MMD2  
RNF138  
GPAM  
ABCA8  
ICE1  
IFITM4P  
SLC39A5  
TNMD  
FGD1  
HCG22  
YIPF7  
MIR1281  
SARDH  
HOMER2  
KLHL17  
PSORS1C2  
RTN2  
MTMR6  
AIPL1  
RNF103  
TRIM17  
ACOT2  
SLC24A3  
PIGH

KANK4  
FAM166B  
KCNK10  
BOP1  
MARS2  
RILPL1  
CNTN6  
MIR1908  
PARS2  
CACHD1  
FOXD4  
CATSPERZ  
LRP5L  
CBX1  
VCX3B  
CYP2W1  
RD3  
PKD1P1  
TM7SF2  
CHP1  
IFNA4  
AVIL  
PNLIPRP3  
PAXX  
LGI2

MIR1287  
TMEM45A  
ATG16L2  
SALL2  
CNGB3  
NRSN1  
MAP3K4  
TIMM22  
ARHGEF37  
TRIM2  
AKR1D1  
BCL7C  
ZNF132  
COA7  
PLPPR4  
LEXM  
UROC1  
MIR2682  
GCA  
CDK19  
NIM1K  
TRANK1  
SLC25A12  
PLA2G4E  
ZNF211

LINC00570

SLC45A1

GPR33

KRT80

PRTFDC1

ANKMY1

TRAPPC2L

ROM1

MED29

FOCAD

VPS53

DNTTIP1

ZNF17

TYW1B

WFDC12

ZNF136

SMC1B

MIR3610

NAT8L

PTCHD1

ZNF780B

GTF3C1

CPEB1

SLC7A13

CAPN13

FIBCD1

ZDHHC5

TRMT44

MIR4782

EDEM1

MYL6B

SLC35B4

SMUG1

PHF2

KATNAL1

VASN

MIR4451

UFM1

APOBEC2

SLC38A11

HSPA12A

MIR1296

MIR487A

FAM83G

AFG3L2

WDR11-AS1

BCDIN3D

MIR718

RPL3P2

H2BC15

MIR1185-1

CENPI

CWC15

OTUD4

ZCCHC12

LINC00708

NOVA2

GNG3

LGALS7B

GRINA

SIT1

PCDHA8

SNX29

CAPNS2

SNORD112

LINC00351

PPFIA3

SLC25A40

CSKMT

DEFB103A

PTPN18

AKNAD1

NLRX1

FNTB

DIP2B

SLC2A1-AS1

CEP57L1

KLHL6

MOCS2

LCN12

TLE2

KIAA1586

NEK5

TXNL4B

TMTC4

VPS35L

CEACAM19

SIPA1L3

LRRC75B

FAM218A

CCDC196

FAM216A

DNAJC12

GAPVD1

ZNF155

LACRT

NOL9

SMAP2

ATMIN

AKAP10

TOGARAM2

ST6GALNAC1

SPATA7

SMG9

ADCY7

PLPPR1

NOM01

IDNK

SLC6A15

LINC00221

PCBP3

MESTIT1

NEUROD6

ATP6V1G3

NRARP

IPP

HLA-H

ZNF592

KLRA1P

LINC01547

CDCP2

CLP1

SEC14L4

LINC02716

TBC1D22A



P4HA1  
EMILIN3  
RAD21-AS1  
CBX6  
ZFHX2  
SNORD50A  
HOXD11  
CSHL1  
CD320  
TTC28  
KDM3B  
MIR1537  
MTMR4  
TRIML2  
SENP5  
SNORD35A  
RTN4IP1  
USP27X  
ZPBP2  
MIR520G  
PALM2  
MINDY1  
GRID2  
ZIM2-AS1  
NIPA2P1

MIR3176  
PACS2  
PARP9  
COL28A1  
BARX1  
RAB6B  
FAM20A  
MIR520H  
RFK  
LOC110008580  
WDR36  
BSPRY  
SEPT5-GP1BB  
MIR604  
DTX3L  
TAOK2  
TEX41  
TMEM50B  
SYT8  
TMEM91  
PLPP7  
METTL9  
YLPM1  
INHBE  
PIGU

DPF1  
ALDH3B2  
UBA3  
KCNU1  
AGXT2  
RPEL1  
LINC00316  
VPS37C  
LGI3  
BTAF1  
MARVELD2  
CNN3  
HMX2  
WDFY2  
VCX2  
H2AC11  
HTR3E  
PIGS  
VWA3B  
UBL7  
HCST  
ZNF84  
PXDNL  
FRMPD4  
FMR1-AS1

ZNF142

ZFP3

ABCD2

TSPAN11

SUCNR1

SSUH2

SPC24

PLEKHH1

PRODH2

MAST1

SMIM13

C17orf107

SNRNP40

TMEM201

SPINK13

CHAD

SLC9B1

TMEM74

DHRS11

WDR73

TMEM120A

SYPL1

NUP42

IL1R1-AS1

RGMA

UBR3  
PROB1  
AASS  
AHCYL1  
ADAMTS6  
POC5  
STPG3  
MIR663AHG  
TYW1  
CCDC134  
H2BC13  
CLASP2  
PANK3  
LIN7B  
IGDCC3  
SETD6  
TC2N  
ORAI2  
GPRC5B  
JAKMIP2  
TMEM25  
KRTAP10-1  
RRP1  
RERGL  
MTF2

STUM

ATP1A1-AS1

H2AC14

ZHX2

CPSF2

NEMP1

SEMA3G

KCNC4

MIR550A1

XRN1

SS18L2

ANKRD55

NAE1

ATP5F1D

EIF3C

DLX1

NUFIP1

PRRX2

APOA1-AS

BCAP29

RHEX

EMX1

SDF2

SLC16A9

CDH15

LMAN2L

ZFY

LRRC37BP1

NAXD

CT75

GORASP2

FM01

TMEM200A

SYPL2

RIBC1

DNAH100S

MFRP

ACY3

MID1IP1

R3HDM1

ISOC1

UCN2

B3GNT3

SLC33A1

GRAMD2A

MYRIP

DYNC1I1

GPM6A

FAM110B

TSPOAP1

SLC25A33

BATF3

SLC36A2

PPM1H

EML3

IMPAD1

GNRHR2

LEMD1

SMCR5

CNTN5

NGRN

VWA8

H2AC15

PFDN4

DAZ4

ZNF497

GATD1

ATP13A1

CENPBD1

ST20-MTHFS

MARCHF10

ANKDD1A

PPP1R27

A1CF

GALNT7



GPR148  
DYRK4  
PCDHA2  
RNF34  
EVI2A  
IFIT2  
MIR519C  
AQP11  
CNTNAP3  
PPP3CC  
COLEC11  
LOC101927318  
FAM161A  
SLC7A4  
OSGEPL1  
CHRFAM7A  
LOC109504728  
XKR4  
MYOZ3  
BMERB1  
MINDY4  
EDF1  
CAPN11  
BEND7  
ARPC1A

SLAMF8  
PMS2P3  
NLRP6  
SLC30A7  
SPATA41  
LOC101927752  
MTIF3  
KPRP  
LOC107963951  
AP4B1-AS1  
VGLL2  
CELSR3  
ZCWPW1  
GPD1  
LYSMD4  
DPY19L1  
RIOK3  
TSPAN3  
CUTA  
UQCRH  
PRSS36  
EIF2B3  
LOC110973015  
ATRAID  
USP38

MICOS13  
SSBP4  
ST8SIA6  
PRR4  
OTOL1  
SOX12  
MIR216B  
PIPOX  
TMEM178A  
B4GAT1  
RWDD3  
KIF3C  
PHIP  
THUMPD1  
LCE4A  
TBX15  
RPS19BP1  
GPCPD1  
RCBTB2  
NOMO2  
NDUFB10  
RGS18  
FOXR1  
KSR2  
PDE6C

C4BPB

A4GNT

NANS

KCNV2

KCNH6

MICE

RSAD1

NIPAL2

MPPE1

ASB1

CRYBA1

MIR676

KLB

SPATA17

SMG8

RPIA

ANXA13

PLPPR3

NBPF14

BBOX1

BZW2

CDR2L

TAS2R20

PHLDB3

ERI2

PCDHA13  
CLASP1  
TIGD4  
FBX045  
CA14  
VAR1  
SCAMP4  
PCYOX1  
COLGALT1  
NBEA  
GOLGA5  
DNAJC28  
SNORD56B  
CAMK2N2  
COLGALT2  
USP12  
GNPDA2  
SCD5  
C19orf53  
DSN1  
PPM1L  
ACOT7  
CFAP97  
ANKRD27  
ADGRL4

PSG9  
CRYL1  
LYSMD1  
RPL23AP1  
DENND4C  
USP42  
PRSS56  
DUSP9  
SPRR2B  
RSRC1  
PBLD  
YJU2  
DENND2C  
STPG2  
PMF1-BGLAP  
STRIP1  
GTPBP2  
LACTB2  
SOCS4  
TSEN15  
THAP7  
STRIP2  
ZNF492  
CELSR2  
MOXD1

ARHGAP21

SEC14L3

S100A7A

FBXL17

JSRP1

TMPPE

CST4

LMBRD2

ARRDC4

ONECUT3

MIR4647

SERPINI2

FRAXA

TDRD5

PPP2R5B

SARAF

FAM114A1

NAA25

SH3BP1

MIR3975

MIR3689C

DGKD

SNHG4

GPR37

MCCD1

PNPLA8  
THEMIS  
ACSM3  
SPATA2  
LNCARSR  
MICC  
UBQLN1P1  
RC3H1  
ADGRE3  
SNHG31  
TRL-AAG2-3  
LOC105372310  
UBE2Q2  
SYTL3  
ATE1  
FRMD7  
MRPL33  
PALD1  
WDFY4  
ATXN7L2  
GOLIM4  
FAM177A1  
PYCR3  
LOC107032825  
HSPB6



PMPCB

PRMT9

SPX

ZKSCAN7

MFSD4A

CA11

TRMT6

MRPL18

SLC10A7

GPR22

OR1C1

OR1N2

FOXI3

HEXA-AS1

PRKAG2-AS1

SNORD109A

SCAANT1

ENSG00000253094

PSORS1C3

NCCRP1

STON2

QARS1

TREML2

APOBEC3C

RAB36

LPIN3  
CNPY3  
AFMID  
FAM167A-AS1  
ARL15  
FNBP1  
LOC108663993  
LOC109951029  
CDHR2  
MMP27  
ZNF750  
MIR663B  
KYAT1  
BFSP1  
HSD3BP4  
FAM104B  
RNU105C  
PWRN2  
ENSG00000257553  
KCNG3  
SUGP1  
IGLC2  
NSUN3  
STAB2  
SEC31B

BDH2  
GPR183  
ORM2  
CLDN9  
APPL2  
RUBCN  
NDUFB6  
PEAR1  
ACBD3  
ARL6  
CLIP4  
KLHDC4  
SERPINB12  
PRPF40B  
MBOAT7  
NUTM2E  
CAMK2N1  
STAMPB  
NECAP1  
TMEM159  
LRRC4C  
TMEM129  
STAB1  
NR2E1  
LIFR-AS1

ZSWIM5  
SNHG18  
ARPIN  
TTC19  
SH3RF2  
SYT17  
MIR4772  
STRN4  
DEFA6  
NETO1  
ANO10  
CTSV  
PFDN2  
UGT2A3  
TEX19  
RNR1  
HCG18  
RHBDL2  
PLEKHA3  
C6orf15  
GUF1  
TRIM39-RPP21  
MED4  
FAM126A  
PILRA

IPMK  
ARRDC2  
DUSP16  
TXNDC16  
PRSS54  
EIF3CL  
RPH3A  
DUS4L  
TSPOAP1-AS1  
MELTF-AS1  
IGHA1  
PLA2G4D  
LOC106146150  
SLX4IP  
UBE2Q1  
APOBEC4  
SYTL4  
DDX19B  
TBC1D9  
COA1  
EEF1E1  
AKAP11  
POTEI  
GABPB2  
GPR137

PARM1  
NME1-NME2  
ZNF34  
NOTCH2NLA  
NPM2  
OAS2  
PEF1  
MCMBP  
LOC106780804  
RPL10L  
VPS8  
BPHL  
OR4X1  
LINC00682  
RRAGD  
CEP162  
TARP  
SLC15A3  
PYROXD2  
ACTL6B  
FAM184A  
RNF170  
GPR88  
SEZ6  
DYRK3

ABCF3  
MPST  
IFNA10  
RTL8B  
ELOF1  
STAM2  
PITPNB  
DNAJC1  
LRCH3  
CAMKV  
ZNF660  
F8A1  
CNDP1  
USPL1  
MIR3658  
USP34  
KCNMB4  
CTSO  
CKAP2L  
MRM1  
FKBP15  
PPIAP9  
HEPHL1  
EMC4  
DMXL1

CBLN1

RBBP8NL

ZNF785

CRYGD

MIF-AS1

ZNF43

REX05

CIPC

TPPP

FAM163A

LINC02593

SYAP1

DALRD3

CDC14B

PALMD

UBP1

IGHA2

CGB1

KLHL26

SLFN14

KAT14

NLRP14

PIGC

IFI44L

ZRANB1



STIMATE  
PLEKHH3  
SSBP2  
MIR4707  
CDC42EP4  
PSPHP1  
CGB2  
BOLA2  
GAL3ST2  
SLC25A31  
FTCD  
PROCA1  
SPTLC3  
TMEM182  
KIAA0513  
KMT2E  
PRTG  
PGAP1  
CALM2P1  
UPB1  
BHMT2  
MS4A3  
TEX12  
NEIL3  
ANP32E

GPR155

TMC05A

MIR320C1

GRIPAP1

ZSCAN21

NFRKB

MSC

RIT2

SBSPON

MYORG

CETN1

ZNF131

TSNAX

EIF1AY

PNCK

RPL19P16

TECTB

LINC00976

CBLN4

MIR1288

LYRM2

RPRML

TECPR1

NDUFB7

AKNA

ZNF516

EFCAB14

MAN2A2

TGDS

CA6

THOC7

ROGDI

C1QTNF3

ABI2

MIR1225

TBC1D16

ADPRS

NCKAP5L

SMPDL3A

KPNA7

SNORD50B

NCK1-DT

ABTB2

NRIP2

ATL2

RASA4

CNTNAP3B

LINC00544

PCIF1

C1orf112

RNF38

P2RY8

ZNF483

RMND1

PLA2G4F

GBP5

CHDH

GRIN2C

TINAG

CLEC2D

IFITM10

FAM53A

GUCD1

TMEM213

HYAL4

SH3YL1

MAIP1

SLC22A17

LINC02145

FHAD1

LYPD5

TIGIT

MIR644A

KCTD17

USP45

PCF11  
NARS2  
AP4S1  
MIR3194  
ZNF81  
XKR6  
TCP11L2  
CSRP2  
BSX  
ELFN2  
ATP6V1G2  
ZNF19  
DDI2  
SNX18  
AADAC  
NOM03  
PHF21B  
TPTEP2-CSNK1E  
SYT13  
FAM13C  
KLHL5  
MIR2277  
CD300A  
GPR141  
ZMYM3

SEC1P  
TRIM55  
CNTNAP4  
IGHV3-69-1  
HOMER3  
FSIP2  
CGB8  
PCDHGA7  
CAMTA1-DT  
PRG3  
CHCHD7  
MIR5681B  
FAM83E  
MIR3074  
PDCD7  
MIR1237  
ALKBH8  
PGBD5  
RABL2A  
CYB561D1  
PRSS35  
TMEM37  
PCDHB9  
MS4A14  
BTBD8

DRP2  
ZNF135  
PADI1  
C17orf58  
AP1G2  
FKBP11  
DENND5A  
PIGY  
MYL5  
ZNF804B  
LHX8  
JMY  
KIAA1841  
PANX3  
MIR5681A  
SLC13A4  
TTLL4  
CCPG1  
SUMO1P1  
FRG1BP  
TAF5  
KLRC3  
LINGO1  
ENPP5  
PPP1R21

WDR61  
DOC2A  
QPRT  
MIR3936  
TOMM20L  
ZBTB25  
DDTL  
SLC30A3  
MYO1G  
PLGRKT  
SLC47A2  
DNAJC5B  
ENPP4  
FAM183A  
ZNF747  
MCEE  
KLHL32  
IFNK  
MIR3187  
C11orf98  
SNORA74B  
EARS2  
PIWIL3  
CAVIN2-AS1  
CRACR2A



HEATR5A

ADTRP

LCE1B

CPNE5

SPRYD4

MIR1224

CGNL1

NLGN4Y

PHYHIPL

NKX6-2

MGC16025

ZNF134

ZNF138

FMO6P

HTR3D

B4GALT2

KBTBD7

ZNF137P

KBTBD6

ITGA6-AS1

MMADHC-DT

CXorf56

CARNMT1

CPPED1

IGHD

ZNF688  
AAVS1  
GPR83  
SCML4  
WDR17  
RCOR2  
GSX2  
SUMO2P1  
SELENOI  
SERPINA11  
MTIF2  
MT4  
COQ10A  
IGFL4  
C6orf163  
FOXA3  
IGHG4  
CCDC178  
IGKV3-20  
LINC00844  
CCDC126  
CCDC28A  
FBLN7  
LOC101929679  
CA13

MIR320E  
PARP15  
PHTF2  
LINS1  
MIR4534  
LOC284930  
LOC107984208  
KLHL13  
ARV1  
LRRC37B  
IGHV3-23  
IGLC3  
LCN1P1  
RNF32  
SPINK6  
TRIM75P  
KRT36  
IGL  
KLHL15  
LINC01703  
RTP3  
CSTP1  
SLC6A17  
OPN5  
BANF1P1

LY86-AS1  
F8A2  
AGMO  
TMEM178B  
KAZN-AS1  
LOC101927066  
TBC1D32  
MARCHF4  
NPIPB15  
MAB21L1  
ZPBP  
VWA5B2  
H2AB1  
MFSD5  
GSG1L  
CCT6B  
NKAIN3  
GABRQ  
ARSD  
PI4K2B  
PSG11  
CA7  
CCDC42  
KDM4E  
ARRDC5

PMFBP1

ZNF182

GCOM2

ADAM21

LINC01714

ZNF10

DCTN6

HERC2P9

NOTCH2NLB

GLUD1P5

ISX

PPIAP10

ATF4P4

AGPAT4-IT1

UBE2R2-AS1

ZNF18

MIR450A1

MIR450A2

RNF39

NOTCH2NLC

ATF4P3

NOTCH2NLR

Table S3 Drug-Active ingredients-Genes-Disease Network

| Chinese.herbal.name.y | Code.y | MOLID.CompoundCID.y | Databases.y | Component                                                                                         | targets |
|-----------------------|--------|---------------------|-------------|---------------------------------------------------------------------------------------------------|---------|
| Bajitian&Shudi        | BJT&SD | MOL000359           | TCMSP       | sitosterol                                                                                        | NCOA2   |
| Bajitian&Shudi        | BJT&SD | MOL000359           | TCMSP       | sitosterol                                                                                        | NR3C2   |
| Bajitian&Shudi        | BJT&SD | MOL000359           | TCMSP       | sitosterol                                                                                        | PGR     |
| Bajitian              | BJT1   | MOL009519           | TCMSP       | (2R,3S)-(+)-3',5-Dihydroxy-4,7-dimethoxydihydroflavonol                                           | PTGS2   |
| Bajitian              | BJT1   | MOL009519           | TCMSP       | (2R,3S)-(+)-3',5-Dihydroxy-4,7-dimethoxydihydroflavonol                                           | PTGS1   |
| Bajitian              | BJT1   | MOL009519           | TCMSP       | (2R,3S)-(+)-3',5-Dihydroxy-4,7-dimethoxydihydroflavonol                                           | SCN5A   |
| Bajitian              | BJT1   | MOL009519           | TCMSP       | (2R,3S)-(+)-3',5-Dihydroxy-4,7-dimethoxydihydroflavonol                                           | NCOA2   |
| Bajitian              | BJT10  | MOL009525           | TCMSP       | 3beta-24S(R)-butyl-5-alkenyl-cholestol                                                            | PGR     |
| Bajitian              | BJT11  | 5318282             | BATMAN-TCM  | 5alpha-Hydroxy-2alpha-(Alpha-Methylbutyryl)-Oxy-7beta,9alpha,10beta-Triacetoxy-4(20),11-Taxadiene | GABRB3  |
| Bajitian              | BJT11  | 5318282             | BATMAN-TCM  | 5alpha-Hydroxy-2alpha-(Alpha-Methylbutyryl)-Oxy-7beta,9alpha,10beta-Triacetoxy-4(20),11-Taxadiene | GLRA3   |
| Bajitian              | BJT11  | 5318282             | BATMAN-TCM  | 5alpha-Hydroxy-2alpha-(Alpha-Methylbutyryl)-Oxy-7beta,9alpha,10beta-Triacetoxy-4(20),11-Taxadiene | HDAC2   |
| Bajitian              | BJT11  | 5318282             | BATMAN-TCM  | 5alpha-Hydroxy-2alpha-(Alpha-Methylbutyryl)-Oxy-7beta,9alpha,10beta-Triacetoxy-4(20),11-Taxadiene | HMGCR   |
| Bajitian              | BJT11  | 5318282             | BATMAN-TCM  | 5alpha-Hydroxy-2alpha-(Alpha-Methylbutyryl)-Oxy-7beta,9alpha,10beta-Triacetoxy-4(20),11-Taxadiene | ITGAL   |

|          |       |           |            |                                                                                                   |        |
|----------|-------|-----------|------------|---------------------------------------------------------------------------------------------------|--------|
| Bajitian | BJT11 | 5318282   | BATMAN-TCM | 5alpha-Hydroxy-2alpha-(Alpha-Methylbutyryl)-Oxy-7beta,9alpha,10beta-Triacetoxy-4(20),11-Taxadiene | ITGB2  |
| Bajitian | BJT11 | 5318282   | BATMAN-TCM | 5alpha-Hydroxy-2alpha-(Alpha-Methylbutyryl)-Oxy-7beta,9alpha,10beta-Triacetoxy-4(20),11-Taxadiene | PRKCA  |
| Bajitian | BJT11 | 5318282   | BATMAN-TCM | 5alpha-Hydroxy-2alpha-(Alpha-Methylbutyryl)-Oxy-7beta,9alpha,10beta-Triacetoxy-4(20),11-Taxadiene | PRKCD  |
| Bajitian | BJT12 | MOL006147 | TCMSP      | Alizarin-2-methylether                                                                            | ESR1   |
| Bajitian | BJT12 | MOL006147 | TCMSP      | Alizarin-2-methylether                                                                            | GABRA1 |
| Bajitian | BJT12 | MOL006147 | TCMSP      | Alizarin-2-methylether                                                                            | NCOA2  |
| Bajitian | BJT12 | MOL006147 | TCMSP      | Alizarin-2-methylether                                                                            | PTGS1  |
| Bajitian | BJT12 | MOL006147 | TCMSP      | Alizarin-2-methylether                                                                            | PTGS2  |
| Bajitian | BJT12 | MOL006147 | TCMSP      | Alizarin-2-methylether                                                                            | RXRA   |
| Bajitian | BJT12 | MOL006147 | TCMSP      | Alizarin-2-methylether                                                                            | SLC6A4 |
| Bajitian | BJT13 | MOL009537 | TCMSP      | americanin A                                                                                      | CCNA2  |
| Bajitian | BJT13 | MOL009537 | TCMSP      | americanin A                                                                                      | ESR1   |
| Bajitian | BJT13 | MOL009537 | TCMSP      | americanin A                                                                                      | GSK3B  |
| Bajitian | BJT13 | MOL009537 | TCMSP      | americanin A                                                                                      | PRSS1  |
| Bajitian | BJT13 | MOL009537 | TCMSP      | americanin A                                                                                      | PTGS2  |

|          |       |           |            |               |         |
|----------|-------|-----------|------------|---------------|---------|
| Bajitian | BJT13 | MOL009537 | TCMSP      | americanin A  | SCN5A   |
| Bajitian | BJT14 | 54670067  | BATMAN-TCM | Ascorbic Acid | ACACA   |
| Bajitian | BJT14 | 54670067  | BATMAN-TCM | Ascorbic Acid | ALKBH2  |
| Bajitian | BJT14 | 54670067  | BATMAN-TCM | Ascorbic Acid | ALKBH3  |
| Bajitian | BJT14 | 54670067  | BATMAN-TCM | Ascorbic Acid | BBOX1   |
| Bajitian | BJT14 | 54670067  | BATMAN-TCM | Ascorbic Acid | CACNA1G |
| Bajitian | BJT14 | 54670067  | BATMAN-TCM | Ascorbic Acid | CRTAP   |
| Bajitian | BJT14 | 54670067  | BATMAN-TCM | Ascorbic Acid | DBH     |
| Bajitian | BJT14 | 54670067  | BATMAN-TCM | Ascorbic Acid | EGLN1   |
| Bajitian | BJT14 | 54670067  | BATMAN-TCM | Ascorbic Acid | EGLN2   |
| Bajitian | BJT14 | 54670067  | BATMAN-TCM | Ascorbic Acid | EGLN3   |
| Bajitian | BJT14 | 54670067  | BATMAN-TCM | Ascorbic Acid | FOLR2   |
| Bajitian | BJT14 | 54670067  | BATMAN-TCM | Ascorbic Acid | FOLR3   |
| Bajitian | BJT14 | 54670067  | BATMAN-TCM | Ascorbic Acid | FTO     |
| Bajitian | BJT14 | 54670067  | BATMAN-TCM | Ascorbic Acid | GBA3    |



|          |       |          |            |               |         |
|----------|-------|----------|------------|---------------|---------|
| Bajitian | BJT14 | 54670067 | BATMAN-TCM | Ascorbic Acid | HLCS    |
| Bajitian | BJT14 | 54670067 | BATMAN-TCM | Ascorbic Acid | KDM5D   |
| Bajitian | BJT14 | 54670067 | BATMAN-TCM | Ascorbic Acid | LCT     |
| Bajitian | BJT14 | 54670067 | BATMAN-TCM | Ascorbic Acid | MAPK7   |
| Bajitian | BJT14 | 54670067 | BATMAN-TCM | Ascorbic Acid | MC3R    |
| Bajitian | BJT14 | 54670067 | BATMAN-TCM | Ascorbic Acid | MCCC1   |
| Bajitian | BJT14 | 54670067 | BATMAN-TCM | Ascorbic Acid | MCCC2   |
| Bajitian | BJT14 | 54670067 | BATMAN-TCM | Ascorbic Acid | MMAA    |
| Bajitian | BJT14 | 54670067 | BATMAN-TCM | Ascorbic Acid | MMAC HC |
| Bajitian | BJT14 | 54670067 | BATMAN-TCM | Ascorbic Acid | MTHFR   |
| Bajitian | BJT14 | 54670067 | BATMAN-TCM | Ascorbic Acid | MTR     |
| Bajitian | BJT14 | 54670067 | BATMAN-TCM | Ascorbic Acid | MTRR    |
| Bajitian | BJT14 | 54670067 | BATMAN-TCM | Ascorbic Acid | P3H1    |
| Bajitian | BJT14 | 54670067 | BATMAN-TCM | Ascorbic Acid | P3H2    |
| Bajitian | BJT14 | 54670067 | BATMAN-TCM | Ascorbic Acid | P4HA1   |

|          |       |          |            |               |         |
|----------|-------|----------|------------|---------------|---------|
| Bajitian | BJT14 | 54670067 | BATMAN-TCM | Ascorbic Acid | P4HTM   |
| Bajitian | BJT14 | 54670067 | BATMAN-TCM | Ascorbic Acid | PAM     |
| Bajitian | BJT14 | 54670067 | BATMAN-TCM | Ascorbic Acid | PC      |
| Bajitian | BJT14 | 54670067 | BATMAN-TCM | Ascorbic Acid | PCCA    |
| Bajitian | BJT14 | 54670067 | BATMAN-TCM | Ascorbic Acid | PCCB    |
| Bajitian | BJT14 | 54670067 | BATMAN-TCM | Ascorbic Acid | PHYH    |
| Bajitian | BJT14 | 54670067 | BATMAN-TCM | Ascorbic Acid | PLOD1   |
| Bajitian | BJT14 | 54670067 | BATMAN-TCM | Ascorbic Acid | PLOD2   |
| Bajitian | BJT14 | 54670067 | BATMAN-TCM | Ascorbic Acid | PLOD3   |
| Bajitian | BJT14 | 54670067 | BATMAN-TCM | Ascorbic Acid | RFK     |
| Bajitian | BJT14 | 54670067 | BATMAN-TCM | Ascorbic Acid | SLC19A2 |
| Bajitian | BJT14 | 54670067 | BATMAN-TCM | Ascorbic Acid | SLC27A2 |
| Bajitian | BJT14 | 54670067 | BATMAN-TCM | Ascorbic Acid | SLC5A6  |
| Bajitian | BJT14 | 54670067 | BATMAN-TCM | Ascorbic Acid | TMLHE   |
| Bajitian | BJT14 | 54670067 | BATMAN-TCM | Ascorbic Acid | TPK1    |

|          |       |           |            |                 |        |
|----------|-------|-----------|------------|-----------------|--------|
| Bajitian | BJT14 | 54670067  | BATMAN-TCM | Ascorbic Acid   | VDR    |
| Bajitian | BJT15 | MOL000358 | TCMSP      | beta-sitosterol | ADRA1A |
| Bajitian | BJT15 | MOL000358 | TCMSP      | beta-sitosterol | ADRA1B |
| Bajitian | BJT15 | MOL000358 | TCMSP      | beta-sitosterol | ADRB2  |
| Bajitian | BJT15 | MOL000358 | TCMSP      | beta-sitosterol | BAX    |
| Bajitian | BJT15 | MOL000358 | TCMSP      | beta-sitosterol | BCL2   |
| Bajitian | BJT15 | MOL000358 | TCMSP      | beta-sitosterol | CASP3  |
| Bajitian | BJT15 | MOL000358 | TCMSP      | beta-sitosterol | CASP8  |
| Bajitian | BJT15 | MOL000358 | TCMSP      | beta-sitosterol | CASP9  |
| Bajitian | BJT15 | MOL000358 | TCMSP      | beta-sitosterol | CHRM1  |
| Bajitian | BJT15 | MOL000358 | TCMSP      | beta-sitosterol | CHRM2  |
| Bajitian | BJT15 | MOL000358 | TCMSP      | beta-sitosterol | CHRM3  |
| Bajitian | BJT15 | MOL000358 | TCMSP      | beta-sitosterol | CHRNA2 |
| Bajitian | BJT15 | MOL000358 | TCMSP      | beta-sitosterol | GABRA1 |
| Bajitian | BJT15 | MOL000358 | TCMSP      | beta-sitosterol | JUN    |

|          |       |           |       |                   |        |
|----------|-------|-----------|-------|-------------------|--------|
| Bajitian | BJT15 | MOL000358 | TCMSP | beta-sitosterol   | KCNH2  |
| Bajitian | BJT15 | MOL000358 | TCMSP | beta-sitosterol   | MAP2   |
| Bajitian | BJT15 | MOL000358 | TCMSP | beta-sitosterol   | NCOA2  |
| Bajitian | BJT15 | MOL000358 | TCMSP | beta-sitosterol   | OPRM1  |
| Bajitian | BJT15 | MOL000358 | TCMSP | beta-sitosterol   | PGR    |
| Bajitian | BJT15 | MOL000358 | TCMSP | beta-sitosterol   | PON1   |
| Bajitian | BJT15 | MOL000358 | TCMSP | beta-sitosterol   | PRKCA  |
| Bajitian | BJT15 | MOL000358 | TCMSP | beta-sitosterol   | PTGS1  |
| Bajitian | BJT15 | MOL000358 | TCMSP | beta-sitosterol   | PTGS2  |
| Bajitian | BJT15 | MOL000358 | TCMSP | beta-sitosterol   | SCN5A  |
| Bajitian | BJT15 | MOL000358 | TCMSP | beta-sitosterol   | SLC6A4 |
| Bajitian | BJT16 | MOL002879 | TCMSP | Diop              | ADRB2  |
| Bajitian | BJT16 | MOL002879 | TCMSP | Diop              | CHRM3  |
| Bajitian | BJT16 | MOL002879 | TCMSP | Diop              | SCN5A  |
| Bajitian | BJT17 | MOL002883 | TCMSP | Ethyl oleate (NF) | NCOA2  |

|          |       |           |       |                                                             |       |
|----------|-------|-----------|-------|-------------------------------------------------------------|-------|
| Bajitian | BJT18 | MOL009551 | TCMSP | isoprincepin                                                | ACHE  |
| Bajitian | BJT18 | MOL009551 | TCMSP | isoprincepin                                                | PRSS1 |
| Bajitian | BJT19 | MOL009562 | TCMSP | Ohioensin A                                                 | CNR1  |
| Bajitian | BJT19 | MOL009562 | TCMSP | Ohioensin A                                                 | CNR2  |
| Bajitian | BJT19 | MOL009562 | TCMSP | Ohioensin A                                                 | DRD2  |
| Bajitian | BJT19 | MOL009562 | TCMSP | Ohioensin A                                                 | MTTP  |
| Bajitian | BJT19 | MOL009562 | TCMSP | Ohioensin A                                                 | PAWR  |
| Bajitian | BJT19 | MOL009562 | TCMSP | Ohioensin A                                                 | SOAT1 |
| Bajitian | BJT19 | MOL009562 | TCMSP | Ohioensin A                                                 | SOAT2 |
| Bajitian | BJT19 | MOL009562 | TCMSP | Ohioensin A                                                 | PTGS1 |
| Bajitian | BJT19 | MOL009562 | TCMSP | Ohioensin A                                                 | PTGS2 |
| Bajitian | BJT2  | MOL009496 | TCMSP | 1,5,7-trihydroxy-6-methoxy-2-methoxymethylanthracenequinone | NCOA1 |
| Bajitian | BJT2  | MOL009496 | TCMSP | 1,5,7-trihydroxy-6-methoxy-2-methoxymethylanthracenequinone | NCOA2 |
| Bajitian | BJT2  | MOL009496 | TCMSP | 1,5,7-trihydroxy-6-methoxy-2-methoxymethylanthracenequinone | PTGS1 |
| Bajitian | BJT2  | MOL009496 | TCMSP | 1,5,7-trihydroxy-6-methoxy-2-methoxymethylanthracenequinone | F7    |

|          |      |           |            |                                                              |        |
|----------|------|-----------|------------|--------------------------------------------------------------|--------|
| Bajitian | BJT2 | MOL009496 | TCMSP      | 1,5,7-trihydroxy-6-methoxy-2-methoxymethylanthracenequinone  | PTGS2  |
| Bajitian | BJT3 | MOL009500 | TCMSP      | 1,6-dihydroxy-5-methoxy-2-(methoxymethyl)-9,10-anthraquinone | PTGS1  |
| Bajitian | BJT3 | MOL009500 | TCMSP      | 1,6-dihydroxy-5-methoxy-2-(methoxymethyl)-9,10-anthraquinone | NCOA2  |
| Bajitian | BJT3 | MOL009500 | TCMSP      | 1,6-dihydroxy-5-methoxy-2-(methoxymethyl)-9,10-anthraquinone | PTGS2  |
| Bajitian | BJT3 | MOL009500 | TCMSP      | 1,6-dihydroxy-5-methoxy-2-(methoxymethyl)-9,10-anthraquinone | RXRA   |
| Bajitian | BJT3 | MOL009500 | TCMSP      | 1,6-dihydroxy-5-methoxy-2-(methoxymethyl)-9,10-anthraquinone | F7     |
| Bajitian | BJT3 | MOL009500 | TCMSP      | 1,6-dihydroxy-5-methoxy-2-(methoxymethyl)-9,10-anthraquinone | NCOA1  |
| Bajitian | BJT3 | MOL009500 | TCMSP      | 1,6-dihydroxy-5-methoxy-2-(methoxymethyl)-9,10-anthraquinone | SCN5A  |
| Bajitian | BJT4 | 160817    | BATMAN-TCM | 1-Hydroxy-2-Methyl-Anthraquinone                             | ESR1   |
| Bajitian | BJT5 | MOL009504 | TCMSP      | 1-hydroxy-6-hydroxymethylanthracenequinone                   | ADRB2  |
| Bajitian | BJT5 | MOL009504 | TCMSP      | 1-hydroxy-6-hydroxymethylanthracenequinone                   | GABRA1 |
| Bajitian | BJT5 | MOL009504 | TCMSP      | 1-hydroxy-6-hydroxymethylanthracenequinone                   | NCOA2  |
| Bajitian | BJT5 | MOL009504 | TCMSP      | 1-hydroxy-6-hydroxymethylanthracenequinone                   | PTGS2  |
| Bajitian | BJT5 | MOL009504 | TCMSP      | 1-hydroxy-6-hydroxymethylanthracenequinone                   | PTGS1  |
| Bajitian | BJT6 | MOL009495 | TCMSP      | 2-hydroxy-1,5-dimethoxy-6-(methoxymethyl)-9,10-anthraquinone | KCNH2  |

|          |      |           |            |                                                              |       |
|----------|------|-----------|------------|--------------------------------------------------------------|-------|
| Bajitian | BJT6 | MOL009495 | TCMSP      | 2-hydroxy-1,5-dimethoxy-6-(methoxymethyl)-9,10-anthraquinone | NCOA2 |
| Bajitian | BJT6 | MOL009495 | TCMSP      | 2-hydroxy-1,5-dimethoxy-6-(methoxymethyl)-9,10-anthraquinone | PTGS1 |
| Bajitian | BJT6 | MOL009495 | TCMSP      | 2-hydroxy-1,5-dimethoxy-6-(methoxymethyl)-9,10-anthraquinone | PTGS2 |
| Bajitian | BJT6 | MOL009495 | TCMSP      | 2-hydroxy-1,5-dimethoxy-6-(methoxymethyl)-9,10-anthraquinone | RXRA  |
| Bajitian | BJT6 | MOL009495 | TCMSP      | 2-hydroxy-1,5-dimethoxy-6-(methoxymethyl)-9,10-anthraquinone | SCN5A |
| Bajitian | BJT6 | MOL009495 | TCMSP      | 2-hydroxy-1,5-dimethoxy-6-(methoxymethyl)-9,10-anthraquinone | F7    |
| Bajitian | BJT6 | MOL009495 | TCMSP      | 2-hydroxy-1,5-dimethoxy-6-(methoxymethyl)-9,10-anthraquinone | NCOA1 |
| Bajitian | BJT7 | MOL009513 | TCMSP      | 2-hydroxy-1,8-dimethoxy-7-methoxymethylanthracenequinone     | F7    |
| Bajitian | BJT7 | MOL009513 | TCMSP      | 2-hydroxy-1,8-dimethoxy-7-methoxymethylanthracenequinone     | NCOA2 |
| Bajitian | BJT7 | MOL009513 | TCMSP      | 2-hydroxy-1,8-dimethoxy-7-methoxymethylanthracenequinone     | PTGS2 |
| Bajitian | BJT7 | MOL009513 | TCMSP      | 2-hydroxy-1,8-dimethoxy-7-methoxymethylanthracenequinone     | RXRA  |
| Bajitian | BJT7 | MOL009513 | TCMSP      | 2-hydroxy-1,8-dimethoxy-7-methoxymethylanthracenequinone     | SCN5A |
| Bajitian | BJT7 | MOL009513 | TCMSP      | 2-hydroxy-1,8-dimethoxy-7-methoxymethylanthracenequinone     | PTGS1 |
| Bajitian | BJT8 | 11796     | BATMAN-TCM | 2-Hydroxyanthraquinone                                       | ESR1  |
| Bajitian | BJT9 | MOL009524 | TCMSP      | 3beta,20(R),5-alkenyl-stigmastol                             | PGR   |

|                 |          |         |            |                              |        |
|-----------------|----------|---------|------------|------------------------------|--------|
| Fuling&Wu weizi | FL&WWZ1  | 5318131 | BATMAN-TCM | 10-Hydroxyacetylbaaccatin Vi | TUBB1  |
| Fuling&Wu weizi | FL&WWZ1  | 5318131 | BATMAN-TCM | 10-Hydroxyacetylbaaccatin Vi | NR1I2  |
| Fuling&Wu weizi | FL&WWZ1  | 5318131 | BATMAN-TCM | 10-Hydroxyacetylbaaccatin Vi | MAPT   |
| Fuling&Wu weizi | FL&WWZ1  | 5318131 | BATMAN-TCM | 10-Hydroxyacetylbaaccatin Vi | MAP4   |
| Fuling&Wu weizi | FL&WWZ1  | 5318131 | BATMAN-TCM | 10-Hydroxyacetylbaaccatin Vi | BCL2   |
| Fuling&Wu weizi | FL&WWZ1  | 5318131 | BATMAN-TCM | 10-Hydroxyacetylbaaccatin Vi | MAP2   |
| Fuling&Wu weizi | FL&WWZ10 | 5318116 | BATMAN-TCM | Hydrangeic Acid              | TPMT   |
| Fuling&Wu weizi | FL&WWZ10 | 5318116 | BATMAN-TCM | Hydrangeic Acid              | EOMES  |
| Fuling&Wu weizi | FL&WWZ10 | 5318116 | BATMAN-TCM | Hydrangeic Acid              | IFNG   |
| Fuling&Wu weizi | FL&WWZ10 | 5318116 | BATMAN-TCM | Hydrangeic Acid              | DNAJA3 |
| Fuling&Wu weizi | FL&WWZ10 | 5318116 | BATMAN-TCM | Hydrangeic Acid              | ADAM8  |
| Fuling&Wu weizi | FL&WWZ10 | 5318116 | BATMAN-TCM | Hydrangeic Acid              | OCLN   |
| Fuling&Wu weizi | FL&WWZ10 | 5318116 | BATMAN-TCM | Hydrangeic Acid              | LGALS9 |
| Fuling&Wu weizi | FL&WWZ11 | 8194    | BATMAN-TCM | Lauric Aldehyde              | ABAT   |
| Fuling&Wu weizi | FL&WWZ11 | 8194    | BATMAN-TCM | Lauric Aldehyde              | SCN11A |



|                    |          |      |                |                 |             |
|--------------------|----------|------|----------------|-----------------|-------------|
| Fuling&Wu<br>weizi | FL&WWZ11 | 8194 | BATMAN-<br>TCM | Lauric Aldehyde | OGDH        |
| Fuling&Wu<br>weizi | FL&WWZ11 | 8194 | BATMAN-<br>TCM | Lauric Aldehyde | SCN1B       |
| Fuling&Wu<br>weizi | FL&WWZ11 | 8194 | BATMAN-<br>TCM | Lauric Aldehyde | SCN2B       |
| Fuling&Wu<br>weizi | FL&WWZ11 | 8194 | BATMAN-<br>TCM | Lauric Aldehyde | AKR1D1      |
| Fuling&Wu<br>weizi | FL&WWZ11 | 8194 | BATMAN-<br>TCM | Lauric Aldehyde | SCN3B       |
| Fuling&Wu<br>weizi | FL&WWZ11 | 8194 | BATMAN-<br>TCM | Lauric Aldehyde | SCN4A       |
| Fuling&Wu<br>weizi | FL&WWZ11 | 8194 | BATMAN-<br>TCM | Lauric Aldehyde | SCN4B       |
| Fuling&Wu<br>weizi | FL&WWZ11 | 8194 | BATMAN-<br>TCM | Lauric Aldehyde | ALDH5<br>A1 |
| Fuling&Wu<br>weizi | FL&WWZ11 | 8194 | BATMAN-<br>TCM | Lauric Aldehyde | SCN5A       |
| Fuling&Wu<br>weizi | FL&WWZ11 | 8194 | BATMAN-<br>TCM | Lauric Aldehyde | HDAC2       |
| Fuling&Wu<br>weizi | FL&WWZ11 | 8194 | BATMAN-<br>TCM | Lauric Aldehyde | ACADS<br>B  |
| Fuling&Wu<br>weizi | FL&WWZ11 | 8194 | BATMAN-<br>TCM | Lauric Aldehyde | SCN8A       |
| Fuling&Wu<br>weizi | FL&WWZ11 | 8194 | BATMAN-<br>TCM | Lauric Aldehyde | SCN9A       |
| Fuling&Wu<br>weizi | FL&WWZ11 | 8194 | BATMAN-<br>TCM | Lauric Aldehyde | SCN3A       |
| Fuling&Wu<br>weizi | FL&WWZ11 | 8194 | BATMAN-<br>TCM | Lauric Aldehyde | SCN2A       |

|                    |          |         |                |                             |             |
|--------------------|----------|---------|----------------|-----------------------------|-------------|
| Fuling&Wu<br>weizi | FL&WWZ11 | 8194    | BATMAN-<br>TCM | Lauric Aldehyde             | SCN7A       |
| Fuling&Wu<br>weizi | FL&WWZ11 | 8194    | BATMAN-<br>TCM | Lauric Aldehyde             | HDAC9       |
| Fuling&Wu<br>weizi | FL&WWZ11 | 8194    | BATMAN-<br>TCM | Lauric Aldehyde             | SRD5A2      |
| Fuling&Wu<br>weizi | FL&WWZ11 | 8194    | BATMAN-<br>TCM | Lauric Aldehyde             | SCN1A       |
| Fuling&Wu<br>weizi | FL&WWZ11 | 8194    | BATMAN-<br>TCM | Lauric Aldehyde             | TYR         |
| Fuling&Wu<br>weizi | FL&WWZ11 | 8194    | BATMAN-<br>TCM | Lauric Aldehyde             | SCN10<br>A  |
| Fuling&Wu<br>weizi | FL&WWZ12 | 5316009 | BATMAN-<br>TCM | O-Acetylpachymic Acid-25-OI | ITGB2       |
| Fuling&Wu<br>weizi | FL&WWZ12 | 5316009 | BATMAN-<br>TCM | O-Acetylpachymic Acid-25-OI | NR3C2       |
| Fuling&Wu<br>weizi | FL&WWZ12 | 5316009 | BATMAN-<br>TCM | O-Acetylpachymic Acid-25-OI | NR3C1       |
| Fuling&Wu<br>weizi | FL&WWZ12 | 5316009 | BATMAN-<br>TCM | O-Acetylpachymic Acid-25-OI | ITGAL       |
| Fuling&Wu<br>weizi | FL&WWZ12 | 5316009 | BATMAN-<br>TCM | O-Acetylpachymic Acid-25-OI | CYP19A<br>1 |
| Fuling&Wu<br>weizi | FL&WWZ12 | 5316009 | BATMAN-<br>TCM | O-Acetylpachymic Acid-25-OI | PTGER4      |
| Fuling&Wu<br>weizi | FL&WWZ12 | 5316009 | BATMAN-<br>TCM | O-Acetylpachymic Acid-25-OI | PTGER3      |
| Fuling&Wu<br>weizi | FL&WWZ12 | 5316009 | BATMAN-<br>TCM | O-Acetylpachymic Acid-25-OI | HDAC2       |
| Fuling&Wu<br>weizi | FL&WWZ12 | 5316009 | BATMAN-<br>TCM | O-Acetylpachymic Acid-25-OI | HMGCR       |

|                    |          |           |                |                             |        |
|--------------------|----------|-----------|----------------|-----------------------------|--------|
| Fuling&Wu<br>weizi | FL&WWZ12 | 5316009   | BATMAN-<br>TCM | O-Acetylpachymic Acid-25-OI | PTGER2 |
| Fuling&Wu<br>weizi | FL&WWZ12 | 5316009   | BATMAN-<br>TCM | O-Acetylpachymic Acid-25-OI | ESR1   |
| Fuling&Wu<br>weizi | FL&WWZ12 | 5316009   | BATMAN-<br>TCM | O-Acetylpachymic Acid-25-OI | PGR    |
| Fuling&Wu<br>weizi | FL&WWZ12 | 5316009   | BATMAN-<br>TCM | O-Acetylpachymic Acid-25-OI | AR     |
| Fuling&Wu<br>weizi | FL&WWZ13 | MOL000289 | TCMSP          | Pachymic Acid               | PGR    |
| Fuling&Wu<br>weizi | FL&WWZ13 | MOL000289 | TCMSP          | Pachymic Acid               | ITGAL  |
| Fuling&Wu<br>weizi | FL&WWZ13 | MOL000289 | TCMSP          | Pachymic Acid               | AR     |
| Fuling&Wu<br>weizi | FL&WWZ13 | MOL000289 | TCMSP          | Pachymic Acid               | HMGCR  |
| Fuling&Wu<br>weizi | FL&WWZ13 | MOL000289 | TCMSP          | Pachymic Acid               | PTGER2 |
| Fuling&Wu<br>weizi | FL&WWZ13 | MOL000289 | TCMSP          | Pachymic Acid               | PTGER4 |
| Fuling&Wu<br>weizi | FL&WWZ13 | MOL000289 | TCMSP          | Pachymic Acid               | PTGER3 |
| Fuling&Wu<br>weizi | FL&WWZ13 | MOL000289 | TCMSP          | Pachymic Acid               | NR3C1  |
| Fuling&Wu<br>weizi | FL&WWZ13 | MOL000289 | TCMSP          | Pachymic Acid               | ANXA1  |
| Fuling&Wu<br>weizi | FL&WWZ13 | MOL000289 | TCMSP          | Pachymic Acid               | ITGB2  |
| Fuling&Wu<br>weizi | FL&WWZ13 | MOL000289 | TCMSP          | Pachymic Acid               | ESR1   |

|                    |          |           |                        |                         |             |
|--------------------|----------|-----------|------------------------|-------------------------|-------------|
| Fuling&Wu<br>weizi | FL&WWZ13 | MOL000289 | TCMSP                  | Pachymic Acid           | NR3C2       |
| Fuling&Wu<br>weizi | FL&WWZ13 | MOL000289 | TCMSP                  | Pachymic Acid           | HDAC2       |
| Fuling&Wu<br>weizi | FL&WWZ13 | MOL000289 | TCMSP                  | Pachymic Acid           | CYP19A<br>1 |
| Fuling&Wu<br>weizi | FL&WWZ14 |           | 125 BATMAN-<br>TCM     | P-Hydroxybenzyl Alcohol | AKR1C1      |
| Fuling&Wu<br>weizi | FL&WWZ14 |           | 125 BATMAN-<br>TCM     | P-Hydroxybenzyl Alcohol | IMPA1       |
| Fuling&Wu<br>weizi | FL&WWZ14 |           | 125 BATMAN-<br>TCM     | P-Hydroxybenzyl Alcohol | PTGS2       |
| Fuling&Wu<br>weizi | FL&WWZ14 |           | 125 BATMAN-<br>TCM     | P-Hydroxybenzyl Alcohol | PTGS1       |
| Fuling&Wu<br>weizi | FL&WWZ14 |           | 125 BATMAN-<br>TCM     | P-Hydroxybenzyl Alcohol | PNPO        |
| Fuling&Wu<br>weizi | FL&WWZ15 | MOL000291 | TCMSP                  | Poricoic Acid B         | NR3C1       |
| Fuling&Wu<br>weizi | FL&WWZ15 | MOL000291 | TCMSP                  | Poricoic Acid B         | ANXA1       |
| Fuling&Wu<br>weizi | FL&WWZ15 | MOL000291 | TCMSP                  | Poricoic Acid B         | PGR         |
| Fuling&Wu<br>weizi | FL&WWZ15 | MOL000291 | TCMSP                  | Poricoic Acid B         | AR          |
| Fuling&Wu<br>weizi | FL&WWZ15 | MOL000291 | TCMSP                  | Poricoic Acid B         | ESR1        |
| Fuling&Wu<br>weizi | FL&WWZ16 |           | 5460935 BATMAN-<br>TCM | Turanose                | CXCR4       |
| Fuling&Wu<br>weizi | FL&WWZ17 |           | 15448 BATMAN-<br>TCM   | Undecan-2-Ol            | ABAT        |

|                    |          |       |                |              |             |
|--------------------|----------|-------|----------------|--------------|-------------|
| Fuling&Wu<br>weizi | FL&WWZ17 | 15448 | BATMAN-<br>TCM | Undecan-2-Ol | AKR1D1      |
| Fuling&Wu<br>weizi | FL&WWZ17 | 15448 | BATMAN-<br>TCM | Undecan-2-Ol | ALDH5<br>A1 |
| Fuling&Wu<br>weizi | FL&WWZ17 | 15448 | BATMAN-<br>TCM | Undecan-2-Ol | HDAC2       |
| Fuling&Wu<br>weizi | FL&WWZ17 | 15448 | BATMAN-<br>TCM | Undecan-2-Ol | KCNK4       |
| Fuling&Wu<br>weizi | FL&WWZ17 | 15448 | BATMAN-<br>TCM | Undecan-2-Ol | OGDH        |
| Fuling&Wu<br>weizi | FL&WWZ17 | 15448 | BATMAN-<br>TCM | Undecan-2-Ol | OPRK1       |
| Fuling&Wu<br>weizi | FL&WWZ17 | 15448 | BATMAN-<br>TCM | Undecan-2-Ol | ACADS<br>B  |
| Fuling&Wu<br>weizi | FL&WWZ17 | 15448 | BATMAN-<br>TCM | Undecan-2-Ol | SCN11<br>A  |
| Fuling&Wu<br>weizi | FL&WWZ17 | 15448 | BATMAN-<br>TCM | Undecan-2-Ol | SCN1A       |
| Fuling&Wu<br>weizi | FL&WWZ17 | 15448 | BATMAN-<br>TCM | Undecan-2-Ol | SCN1B       |
| Fuling&Wu<br>weizi | FL&WWZ17 | 15448 | BATMAN-<br>TCM | Undecan-2-Ol | SCN2A       |
| Fuling&Wu<br>weizi | FL&WWZ17 | 15448 | BATMAN-<br>TCM | Undecan-2-Ol | SCN2B       |
| Fuling&Wu<br>weizi | FL&WWZ17 | 15448 | BATMAN-<br>TCM | Undecan-2-Ol | SCN3A       |
| Fuling&Wu<br>weizi | FL&WWZ17 | 15448 | BATMAN-<br>TCM | Undecan-2-Ol | SCN3B       |
| Fuling&Wu<br>weizi | FL&WWZ17 | 15448 | BATMAN-<br>TCM | Undecan-2-Ol | SCN4A       |

|                    |          |         |                |                        |            |
|--------------------|----------|---------|----------------|------------------------|------------|
| Fuling&Wu<br>weizi | FL&WWZ17 | 15448   | BATMAN-<br>TCM | Undecan-2-Ol           | HDAC9      |
| Fuling&Wu<br>weizi | FL&WWZ17 | 15448   | BATMAN-<br>TCM | Undecan-2-Ol           | SCN5A      |
| Fuling&Wu<br>weizi | FL&WWZ17 | 15448   | BATMAN-<br>TCM | Undecan-2-Ol           | SCN7A      |
| Fuling&Wu<br>weizi | FL&WWZ17 | 15448   | BATMAN-<br>TCM | Undecan-2-Ol           | SCN8A      |
| Fuling&Wu<br>weizi | FL&WWZ17 | 15448   | BATMAN-<br>TCM | Undecan-2-Ol           | SCN10<br>A |
| Fuling&Wu<br>weizi | FL&WWZ17 | 15448   | BATMAN-<br>TCM | Undecan-2-Ol           | SRD5A2     |
| Fuling&Wu<br>weizi | FL&WWZ17 | 15448   | BATMAN-<br>TCM | Undecan-2-Ol           | TRPA1      |
| Fuling&Wu<br>weizi | FL&WWZ17 | 15448   | BATMAN-<br>TCM | Undecan-2-Ol           | TRPM8      |
| Fuling&Wu<br>weizi | FL&WWZ17 | 15448   | BATMAN-<br>TCM | Undecan-2-Ol           | TRPV3      |
| Fuling&Wu<br>weizi | FL&WWZ17 | 15448   | BATMAN-<br>TCM | Undecan-2-Ol           | TYR        |
| Fuling&Wu<br>weizi | FL&WWZ17 | 15448   | BATMAN-<br>TCM | Undecan-2-Ol           | SCN4B      |
| Fuling&Wu<br>weizi | FL&WWZ17 | 15448   | BATMAN-<br>TCM | Undecan-2-Ol           | SCN9A      |
| Fuling&Wu<br>weizi | FL&WWZ2  | 5318035 | BATMAN-<br>TCM | 20-Hexadecanoylingenol | PRKCD      |
| Fuling&Wu<br>weizi | FL&WWZ2  | 5318035 | BATMAN-<br>TCM | 20-Hexadecanoylingenol | PRKCA      |
| Fuling&Wu<br>weizi | FL&WWZ3  | 190     | BATMAN-<br>TCM | Adenine                | ACSL1      |

|                    |         |     |                |         |             |
|--------------------|---------|-----|----------------|---------|-------------|
| Fuling&Wu<br>weizi | FL&WWZ3 | 190 | BATMAN-<br>TCM | Adenine | ACSS2       |
| Fuling&Wu<br>weizi | FL&WWZ3 | 190 | BATMAN-<br>TCM | Adenine | ADK         |
| Fuling&Wu<br>weizi | FL&WWZ3 | 190 | BATMAN-<br>TCM | Adenine | ADORA<br>1  |
| Fuling&Wu<br>weizi | FL&WWZ3 | 190 | BATMAN-<br>TCM | Adenine | ADORA<br>2A |
| Fuling&Wu<br>weizi | FL&WWZ3 | 190 | BATMAN-<br>TCM | Adenine | ADORA<br>3  |
| Fuling&Wu<br>weizi | FL&WWZ3 | 190 | BATMAN-<br>TCM | Adenine | AMD1        |
| Fuling&Wu<br>weizi | FL&WWZ3 | 190 | BATMAN-<br>TCM | Adenine | CBS         |
| Fuling&Wu<br>weizi | FL&WWZ3 | 190 | BATMAN-<br>TCM | Adenine | CBSL        |
| Fuling&Wu<br>weizi | FL&WWZ3 | 190 | BATMAN-<br>TCM | Adenine | COMT        |
| Fuling&Wu<br>weizi | FL&WWZ3 | 190 | BATMAN-<br>TCM | Adenine | CREB1       |
| Fuling&Wu<br>weizi | FL&WWZ3 | 190 | BATMAN-<br>TCM | Adenine | DCK         |
| Fuling&Wu<br>weizi | FL&WWZ3 | 190 | BATMAN-<br>TCM | Adenine | FBP1        |
| Fuling&Wu<br>weizi | FL&WWZ3 | 190 | BATMAN-<br>TCM | Adenine | ADCY1       |
| Fuling&Wu<br>weizi | FL&WWZ3 | 190 | BATMAN-<br>TCM | Adenine | HINT1       |
| Fuling&Wu<br>weizi | FL&WWZ3 | 190 | BATMAN-<br>TCM | Adenine | MAT1A       |

|                    |         |     |                |         |             |
|--------------------|---------|-----|----------------|---------|-------------|
| Fuling&Wu<br>weizi | FL&WWZ3 | 190 | BATMAN-<br>TCM | Adenine | MAT2A       |
| Fuling&Wu<br>weizi | FL&WWZ3 | 190 | BATMAN-<br>TCM | Adenine | ADORA<br>2B |
| Fuling&Wu<br>weizi | FL&WWZ3 | 190 | BATMAN-<br>TCM | Adenine | PDE4D       |
| Fuling&Wu<br>weizi | FL&WWZ3 | 190 | BATMAN-<br>TCM | Adenine | PIM1        |
| Fuling&Wu<br>weizi | FL&WWZ3 | 190 | BATMAN-<br>TCM | Adenine | PNP         |
| Fuling&Wu<br>weizi | FL&WWZ3 | 190 | BATMAN-<br>TCM | Adenine | POLA1       |
| Fuling&Wu<br>weizi | FL&WWZ3 | 190 | BATMAN-<br>TCM | Adenine | POLE        |
| Fuling&Wu<br>weizi | FL&WWZ3 | 190 | BATMAN-<br>TCM | Adenine | POLE3       |
| Fuling&Wu<br>weizi | FL&WWZ3 | 190 | BATMAN-<br>TCM | Adenine | PRKAA1      |
| Fuling&Wu<br>weizi | FL&WWZ3 | 190 | BATMAN-<br>TCM | Adenine | PRKAB1      |
| Fuling&Wu<br>weizi | FL&WWZ3 | 190 | BATMAN-<br>TCM | Adenine | GNMT        |
| Fuling&Wu<br>weizi | FL&WWZ3 | 190 | BATMAN-<br>TCM | Adenine | PYGL        |
| Fuling&Wu<br>weizi | FL&WWZ3 | 190 | BATMAN-<br>TCM | Adenine | RRM1        |
| Fuling&Wu<br>weizi | FL&WWZ3 | 190 | BATMAN-<br>TCM | Adenine | RRM2        |
| Fuling&Wu<br>weizi | FL&WWZ3 | 190 | BATMAN-<br>TCM | Adenine | PDE4B       |



|                    |         |           |       |                |                      |              |
|--------------------|---------|-----------|-------|----------------|----------------------|--------------|
| Fuling&Wu<br>weizi | FL&WWZ3 |           | 190   | BATMAN-<br>TCM | Adenine              | RRM2B        |
| Fuling&Wu<br>weizi | FL&WWZ3 |           | 190   | BATMAN-<br>TCM | Adenine              | PRKAB2       |
| Fuling&Wu<br>weizi | FL&WWZ4 |           | 92156 | BATMAN-<br>TCM | Beta-Amyrin Acetate  | ESR1         |
| Fuling&Wu<br>weizi | FL&WWZ4 |           | 92156 | BATMAN-<br>TCM | Beta-Amyrin Acetate  | NR3C1        |
| Fuling&Wu<br>weizi | FL&WWZ4 |           | 92156 | BATMAN-<br>TCM | Beta-Amyrin Acetate  | AR           |
| Fuling&Wu<br>weizi | FL&WWZ4 |           | 92156 | BATMAN-<br>TCM | Beta-Amyrin Acetate  | CYP19A<br>1  |
| Fuling&Wu<br>weizi | FL&WWZ4 |           | 92156 | BATMAN-<br>TCM | Beta-Amyrin Acetate  | PGR          |
| Fuling&Wu<br>weizi | FL&WWZ4 |           | 92156 | BATMAN-<br>TCM | Beta-Amyrin Acetate  | NR3C2        |
| Fuling&Wu<br>weizi | FL&WWZ5 |           | 305   | BATMAN-<br>TCM | Choline              | COLQ         |
| Fuling&Wu<br>weizi | FL&WWZ5 |           | 305   | BATMAN-<br>TCM | Choline              | PCYT1A       |
| Fuling&Wu<br>weizi | FL&WWZ5 |           | 305   | BATMAN-<br>TCM | Choline              | PHOSP<br>HO1 |
| Fuling&Wu<br>weizi | FL&WWZ5 |           | 305   | BATMAN-<br>TCM | Choline              | BCHE         |
| Fuling&Wu<br>weizi | FL&WWZ5 |           | 305   | BATMAN-<br>TCM | Choline              | PLD2         |
| Fuling&Wu<br>weizi | FL&WWZ5 |           | 305   | BATMAN-<br>TCM | Choline              | ACHE         |
| Fuling&Wu<br>weizi | FL&WWZ6 | MOL000300 |       | TCMSP          | Dehydroeburicoicacid | CYP17A<br>1  |

|                    |         |           |       |                      |             |
|--------------------|---------|-----------|-------|----------------------|-------------|
| Fuling&Wu<br>weizi | FL&WWZ6 | MOL000300 | TCMSP | Dehydroeburicoicacid | SLC8A1      |
| Fuling&Wu<br>weizi | FL&WWZ6 | MOL000300 | TCMSP | Dehydroeburicoicacid | RARG        |
| Fuling&Wu<br>weizi | FL&WWZ6 | MOL000300 | TCMSP | Dehydroeburicoicacid | PTGS1       |
| Fuling&Wu<br>weizi | FL&WWZ6 | MOL000300 | TCMSP | Dehydroeburicoicacid | RARRES<br>1 |
| Fuling&Wu<br>weizi | FL&WWZ6 | MOL000300 | TCMSP | Dehydroeburicoicacid | PTGER4      |
| Fuling&Wu<br>weizi | FL&WWZ6 | MOL000300 | TCMSP | Dehydroeburicoicacid | ESR1        |
| Fuling&Wu<br>weizi | FL&WWZ6 | MOL000300 | TCMSP | Dehydroeburicoicacid | F12         |
| Fuling&Wu<br>weizi | FL&WWZ6 | MOL000300 | TCMSP | Dehydroeburicoicacid | NR3C1       |
| Fuling&Wu<br>weizi | FL&WWZ6 | MOL000300 | TCMSP | Dehydroeburicoicacid | RXRG        |
| Fuling&Wu<br>weizi | FL&WWZ6 | MOL000300 | TCMSP | Dehydroeburicoicacid | NR3C2       |
| Fuling&Wu<br>weizi | FL&WWZ6 | MOL000300 | TCMSP | Dehydroeburicoicacid | PTGER3      |
| Fuling&Wu<br>weizi | FL&WWZ6 | MOL000300 | TCMSP | Dehydroeburicoicacid | PTGER2      |
| Fuling&Wu<br>weizi | FL&WWZ6 | MOL000300 | TCMSP | Dehydroeburicoicacid | PTGS2       |
| Fuling&Wu<br>weizi | FL&WWZ6 | MOL000300 | TCMSP | Dehydroeburicoicacid | AR          |
| Fuling&Wu<br>weizi | FL&WWZ6 | MOL000300 | TCMSP | Dehydroeburicoicacid | RXRA        |

|                    |         |           |       |                      |             |
|--------------------|---------|-----------|-------|----------------------|-------------|
| Fuling&Wu<br>weizi | FL&WWZ6 | MOL000300 | TCMSP | Dehydroeburicoicacid | RARB        |
| Fuling&Wu<br>weizi | FL&WWZ6 | MOL000300 | TCMSP | Dehydroeburicoicacid | TRPV1       |
| Fuling&Wu<br>weizi | FL&WWZ6 | MOL000300 | TCMSP | Dehydroeburicoicacid | ALDH1<br>A1 |
| Fuling&Wu<br>weizi | FL&WWZ6 | MOL000300 | TCMSP | Dehydroeburicoicacid | ALDH1<br>A2 |
| Fuling&Wu<br>weizi | FL&WWZ6 | MOL000300 | TCMSP | Dehydroeburicoicacid | SRD5A1      |
| Fuling&Wu<br>weizi | FL&WWZ6 | MOL000300 | TCMSP | Dehydroeburicoicacid | PGR         |
| Fuling&Wu<br>weizi | FL&WWZ6 | MOL000300 | TCMSP | Dehydroeburicoicacid | ELOVL4      |
| Fuling&Wu<br>weizi | FL&WWZ6 | MOL000300 | TCMSP | Dehydroeburicoicacid | RARA        |
| Fuling&Wu<br>weizi | FL&WWZ6 | MOL000300 | TCMSP | Dehydroeburicoicacid | FADS2       |
| Fuling&Wu<br>weizi | FL&WWZ6 | MOL000300 | TCMSP | Dehydroeburicoicacid | NROB1       |
| Fuling&Wu<br>weizi | FL&WWZ6 | MOL000300 | TCMSP | Dehydroeburicoicacid | PTGER1      |
| Fuling&Wu<br>weizi | FL&WWZ6 | MOL000300 | TCMSP | Dehydroeburicoicacid | OPRK1       |
| Fuling&Wu<br>weizi | FL&WWZ6 | MOL000300 | TCMSP | Dehydroeburicoicacid | GPRC5<br>A  |
| Fuling&Wu<br>weizi | FL&WWZ6 | MOL000300 | TCMSP | Dehydroeburicoicacid | ANXA1       |
| Fuling&Wu<br>weizi | FL&WWZ6 | MOL000300 | TCMSP | Dehydroeburicoicacid | RXRB        |

|                    |         |           |                |                      |             |
|--------------------|---------|-----------|----------------|----------------------|-------------|
| Fuling&Wu<br>weizi | FL&WWZ6 | MOL000300 | TCMSP          | Dehydroeburicoicacid | FADS1       |
| Fuling&Wu<br>weizi | FL&WWZ6 | MOL000300 | TCMSP          | Dehydroeburicoicacid | VDR         |
| Fuling&Wu<br>weizi | FL&WWZ7 | 9803310   | BATMAN-<br>TCM | Eburicol             | ADH1A       |
| Fuling&Wu<br>weizi | FL&WWZ7 | 9803310   | BATMAN-<br>TCM | Eburicol             | ADH1B       |
| Fuling&Wu<br>weizi | FL&WWZ7 | 9803310   | BATMAN-<br>TCM | Eburicol             | ADH1C       |
| Fuling&Wu<br>weizi | FL&WWZ7 | 9803310   | BATMAN-<br>TCM | Eburicol             | ALDH1<br>A2 |
| Fuling&Wu<br>weizi | FL&WWZ7 | 9803310   | BATMAN-<br>TCM | Eburicol             | ALDH1<br>A3 |
| Fuling&Wu<br>weizi | FL&WWZ7 | 9803310   | BATMAN-<br>TCM | Eburicol             | ALDH2       |
| Fuling&Wu<br>weizi | FL&WWZ7 | 9803310   | BATMAN-<br>TCM | Eburicol             | CYP17A<br>1 |
| Fuling&Wu<br>weizi | FL&WWZ7 | 9803310   | BATMAN-<br>TCM | Eburicol             | DHRS3       |
| Fuling&Wu<br>weizi | FL&WWZ7 | 9803310   | BATMAN-<br>TCM | Eburicol             | DLG4        |
| Fuling&Wu<br>weizi | FL&WWZ7 | 9803310   | BATMAN-<br>TCM | Eburicol             | ESR1        |
| Fuling&Wu<br>weizi | FL&WWZ7 | 9803310   | BATMAN-<br>TCM | Eburicol             | GAMT        |
| Fuling&Wu<br>weizi | FL&WWZ7 | 9803310   | BATMAN-<br>TCM | Eburicol             | GATM        |
| Fuling&Wu<br>weizi | FL&WWZ7 | 9803310   | BATMAN-<br>TCM | Eburicol             | IYD         |

|                    |         |         |                |          |             |
|--------------------|---------|---------|----------------|----------|-------------|
| Fuling&Wu<br>weizi | FL&WWZ7 | 9803310 | BATMAN-<br>TCM | Eburicol | KCNA1       |
| Fuling&Wu<br>weizi | FL&WWZ7 | 9803310 | BATMAN-<br>TCM | Eburicol | ALDH1<br>A1 |
| Fuling&Wu<br>weizi | FL&WWZ7 | 9803310 | BATMAN-<br>TCM | Eburicol | KCNA4       |
| Fuling&Wu<br>weizi | FL&WWZ7 | 9803310 | BATMAN-<br>TCM | Eburicol | KCNA5       |
| Fuling&Wu<br>weizi | FL&WWZ7 | 9803310 | BATMAN-<br>TCM | Eburicol | KCNB1       |
| Fuling&Wu<br>weizi | FL&WWZ7 | 9803310 | BATMAN-<br>TCM | Eburicol | CAT         |
| Fuling&Wu<br>weizi | FL&WWZ7 | 9803310 | BATMAN-<br>TCM | Eburicol | KCNC3       |
| Fuling&Wu<br>weizi | FL&WWZ7 | 9803310 | BATMAN-<br>TCM | Eburicol | KCND1       |
| Fuling&Wu<br>weizi | FL&WWZ7 | 9803310 | BATMAN-<br>TCM | Eburicol | KCND2       |
| Fuling&Wu<br>weizi | FL&WWZ7 | 9803310 | BATMAN-<br>TCM | Eburicol | KCND3       |
| Fuling&Wu<br>weizi | FL&WWZ7 | 9803310 | BATMAN-<br>TCM | Eburicol | KCNK4       |
| Fuling&Wu<br>weizi | FL&WWZ7 | 9803310 | BATMAN-<br>TCM | Eburicol | KCNQ1       |
| Fuling&Wu<br>weizi | FL&WWZ7 | 9803310 | BATMAN-<br>TCM | Eburicol | LRAT        |
| Fuling&Wu<br>weizi | FL&WWZ7 | 9803310 | BATMAN-<br>TCM | Eburicol | NR3C2       |
| Fuling&Wu<br>weizi | FL&WWZ7 | 9803310 | BATMAN-<br>TCM | Eburicol | KCNA2       |

|                    |         |         |                |            |             |
|--------------------|---------|---------|----------------|------------|-------------|
| Fuling&Wu<br>weizi | FL&WWZ7 | 9803310 | BATMAN-<br>TCM | Eburicol   | PGR         |
| Fuling&Wu<br>weizi | FL&WWZ7 | 9803310 | BATMAN-<br>TCM | Eburicol   | PRKAB1      |
| Fuling&Wu<br>weizi | FL&WWZ7 | 9803310 | BATMAN-<br>TCM | Eburicol   | RBP1        |
| Fuling&Wu<br>weizi | FL&WWZ7 | 9803310 | BATMAN-<br>TCM | Eburicol   | KCNC1       |
| Fuling&Wu<br>weizi | FL&WWZ7 | 9803310 | BATMAN-<br>TCM | Eburicol   | RDH12       |
| Fuling&Wu<br>weizi | FL&WWZ7 | 9803310 | BATMAN-<br>TCM | Eburicol   | RDH5        |
| Fuling&Wu<br>weizi | FL&WWZ7 | 9803310 | BATMAN-<br>TCM | Eburicol   | RLBP1       |
| Fuling&Wu<br>weizi | FL&WWZ7 | 9803310 | BATMAN-<br>TCM | Eburicol   | RNASE1      |
| Fuling&Wu<br>weizi | FL&WWZ7 | 9803310 | BATMAN-<br>TCM | Eburicol   | TPO         |
| Fuling&Wu<br>weizi | FL&WWZ7 | 9803310 | BATMAN-<br>TCM | Eburicol   | OPRK1       |
| Fuling&Wu<br>weizi | FL&WWZ7 | 9803310 | BATMAN-<br>TCM | Eburicol   | RBP3        |
| Fuling&Wu<br>weizi | FL&WWZ8 | 444679  | BATMAN-<br>TCM | Ergosterol | CYP27B<br>1 |
| Fuling&Wu<br>weizi | FL&WWZ8 | 444679  | BATMAN-<br>TCM | Ergosterol | SNW1        |
| Fuling&Wu<br>weizi | FL&WWZ8 | 444679  | BATMAN-<br>TCM | Ergosterol | VDR         |
| Fuling&Wu<br>weizi | FL&WWZ8 | 444679  | BATMAN-<br>TCM | Ergosterol | GC          |

|                    |         |      |                |            |            |
|--------------------|---------|------|----------------|------------|------------|
| Fuling&Wu<br>weizi | FL&WWZ9 | 8223 | BATMAN-<br>TCM | Ergotamine | ADRA1<br>A |
| Fuling&Wu<br>weizi | FL&WWZ9 | 8223 | BATMAN-<br>TCM | Ergotamine | ADRA2<br>A |
| Fuling&Wu<br>weizi | FL&WWZ9 | 8223 | BATMAN-<br>TCM | Ergotamine | ADRA2<br>B |
| Fuling&Wu<br>weizi | FL&WWZ9 | 8223 | BATMAN-<br>TCM | Ergotamine | ADRA2<br>C |
| Fuling&Wu<br>weizi | FL&WWZ9 | 8223 | BATMAN-<br>TCM | Ergotamine | CD34       |
| Fuling&Wu<br>weizi | FL&WWZ9 | 8223 | BATMAN-<br>TCM | Ergotamine | CHRNA<br>7 |
| Fuling&Wu<br>weizi | FL&WWZ9 | 8223 | BATMAN-<br>TCM | Ergotamine | CNR1       |
| Fuling&Wu<br>weizi | FL&WWZ9 | 8223 | BATMAN-<br>TCM | Ergotamine | DNMT3<br>A |
| Fuling&Wu<br>weizi | FL&WWZ9 | 8223 | BATMAN-<br>TCM | Ergotamine | DRD1       |
| Fuling&Wu<br>weizi | FL&WWZ9 | 8223 | BATMAN-<br>TCM | Ergotamine | DRD2       |
| Fuling&Wu<br>weizi | FL&WWZ9 | 8223 | BATMAN-<br>TCM | Ergotamine | DRD3       |
| Fuling&Wu<br>weizi | FL&WWZ9 | 8223 | BATMAN-<br>TCM | Ergotamine | DRD4       |
| Fuling&Wu<br>weizi | FL&WWZ9 | 8223 | BATMAN-<br>TCM | Ergotamine | ADRA1<br>B |
| Fuling&Wu<br>weizi | FL&WWZ9 | 8223 | BATMAN-<br>TCM | Ergotamine | GABRA<br>1 |
| Fuling&Wu<br>weizi | FL&WWZ9 | 8223 | BATMAN-<br>TCM | Ergotamine | GABRA<br>2 |

|                    |         |      |                |            |            |
|--------------------|---------|------|----------------|------------|------------|
| Fuling&Wu<br>weizi | FL&WWZ9 | 8223 | BATMAN-<br>TCM | Ergotamine | GABRA<br>3 |
| Fuling&Wu<br>weizi | FL&WWZ9 | 8223 | BATMAN-<br>TCM | Ergotamine | CALCA      |
| Fuling&Wu<br>weizi | FL&WWZ9 | 8223 | BATMAN-<br>TCM | Ergotamine | GABRA<br>5 |
| Fuling&Wu<br>weizi | FL&WWZ9 | 8223 | BATMAN-<br>TCM | Ergotamine | GABRA<br>6 |
| Fuling&Wu<br>weizi | FL&WWZ9 | 8223 | BATMAN-<br>TCM | Ergotamine | GABRB1     |
| Fuling&Wu<br>weizi | FL&WWZ9 | 8223 | BATMAN-<br>TCM | Ergotamine | GABRB2     |
| Fuling&Wu<br>weizi | FL&WWZ9 | 8223 | BATMAN-<br>TCM | Ergotamine | GABRB3     |
| Fuling&Wu<br>weizi | FL&WWZ9 | 8223 | BATMAN-<br>TCM | Ergotamine | GABRD      |
| Fuling&Wu<br>weizi | FL&WWZ9 | 8223 | BATMAN-<br>TCM | Ergotamine | GABRE      |
| Fuling&Wu<br>weizi | FL&WWZ9 | 8223 | BATMAN-<br>TCM | Ergotamine | GABRG<br>2 |
| Fuling&Wu<br>weizi | FL&WWZ9 | 8223 | BATMAN-<br>TCM | Ergotamine | DRD5       |
| Fuling&Wu<br>weizi | FL&WWZ9 | 8223 | BATMAN-<br>TCM | Ergotamine | GABRQ      |
| Fuling&Wu<br>weizi | FL&WWZ9 | 8223 | BATMAN-<br>TCM | Ergotamine | HTR1A      |
| Fuling&Wu<br>weizi | FL&WWZ9 | 8223 | BATMAN-<br>TCM | Ergotamine | HTR1B      |
| Fuling&Wu<br>weizi | FL&WWZ9 | 8223 | BATMAN-<br>TCM | Ergotamine | GABRA<br>4 |



|                    |         |      |                |            |             |
|--------------------|---------|------|----------------|------------|-------------|
| Fuling&Wu<br>weizi | FL&WWZ9 | 8223 | BATMAN-<br>TCM | Ergotamine | HTR2A       |
| Fuling&Wu<br>weizi | FL&WWZ9 | 8223 | BATMAN-<br>TCM | Ergotamine | HTR2B       |
| Fuling&Wu<br>weizi | FL&WWZ9 | 8223 | BATMAN-<br>TCM | Ergotamine | HTR2C       |
| Fuling&Wu<br>weizi | FL&WWZ9 | 8223 | BATMAN-<br>TCM | Ergotamine | HTR3A       |
| Fuling&Wu<br>weizi | FL&WWZ9 | 8223 | BATMAN-<br>TCM | Ergotamine | HTR3C       |
| Fuling&Wu<br>weizi | FL&WWZ9 | 8223 | BATMAN-<br>TCM | Ergotamine | HTR3D       |
| Fuling&Wu<br>weizi | FL&WWZ9 | 8223 | BATMAN-<br>TCM | Ergotamine | HTR3E       |
| Fuling&Wu<br>weizi | FL&WWZ9 | 8223 | BATMAN-<br>TCM | Ergotamine | HTR4        |
| Fuling&Wu<br>weizi | FL&WWZ9 | 8223 | BATMAN-<br>TCM | Ergotamine | HTR7        |
| Fuling&Wu<br>weizi | FL&WWZ9 | 8223 | BATMAN-<br>TCM | Ergotamine | INS         |
| Fuling&Wu<br>weizi | FL&WWZ9 | 8223 | BATMAN-<br>TCM | Ergotamine | PHKG2       |
| Fuling&Wu<br>weizi | FL&WWZ9 | 8223 | BATMAN-<br>TCM | Ergotamine | SLC22A<br>1 |
| Fuling&Wu<br>weizi | FL&WWZ9 | 8223 | BATMAN-<br>TCM | Ergotamine | SLC6A2      |
| Fuling&Wu<br>weizi | FL&WWZ9 | 8223 | BATMAN-<br>TCM | Ergotamine | SLCO2B<br>1 |
| Fuling&Wu<br>weizi | FL&WWZ9 | 8223 | BATMAN-<br>TCM | Ergotamine | GABRG<br>3  |

|                    |         |           |      |                |                                                                                                                         |            |
|--------------------|---------|-----------|------|----------------|-------------------------------------------------------------------------------------------------------------------------|------------|
| Fuling&Wu<br>weizi | FL&WWZ9 |           | 8223 | BATMAN-<br>TCM | Ergotamine                                                                                                              | HTR1D      |
| Fuling             | FL1     | MOL000273 |      | TCMSP          | (2R)-2-<br>[(3S,5R,10S,13R,14R,16R,17R)-3,16-<br>dihydroxy-4,4,10,13,14-<br>pentamethyl-2,3,5,6,12,15,16,17-<br>(2R)-2- | NCOA2      |
| Fuling             | FL1     | MOL000273 |      | TCMSP          | [(3S,5R,10S,13R,14R,16R,17R)-3,16-<br>dihydroxy-4,4,10,13,14-<br>pentamethyl-2,3,5,6,12,15,16,17-                       | NR3C2      |
| Fuling             | FL2     | MOL000279 |      | TCMSP          | Cerevisterol                                                                                                            | NR3C2      |
| Fuling             | FL3     | MOL000282 |      | TCMSP          | ergosta-7,22E-dien-3beta-ol                                                                                             | PGR        |
| Fuling             | FL4     | MOL000283 |      | TCMSP          | Ergosterol peroxide                                                                                                     | PGR        |
| Fuling             | FL5     | MOL000296 |      | TCMSP          | hederagenin                                                                                                             | ADH1B      |
| Fuling             | FL5     | MOL000296 |      | TCMSP          | hederagenin                                                                                                             | ADRA1<br>B |
| Fuling             | FL5     | MOL000296 |      | TCMSP          | hederagenin                                                                                                             | CHRM1      |
| Fuling             | FL5     | MOL000296 |      | TCMSP          | hederagenin                                                                                                             | CHRM2      |
| Fuling             | FL5     | MOL000296 |      | TCMSP          | hederagenin                                                                                                             | GABRA<br>1 |
| Fuling             | FL5     | MOL000296 |      | TCMSP          | hederagenin                                                                                                             | GRIA2      |
| Fuling             | FL5     | MOL000296 |      | TCMSP          | hederagenin                                                                                                             | LYZ        |
| Fuling             | FL5     | MOL000296 |      | TCMSP          | hederagenin                                                                                                             | ADH1C      |
| Fuling             | FL5     | MOL000296 |      | TCMSP          | hederagenin                                                                                                             | PGR        |

|         |      |           |            |                             |        |
|---------|------|-----------|------------|-----------------------------|--------|
| Fuling  | FL5  | MOL000296 | TCMSP      | hederagenin                 | PTGS1  |
| Fuling  | FL5  | MOL000296 | TCMSP      | hederagenin                 | PTGS2  |
| Fuling  | FL5  | MOL000296 | TCMSP      | hederagenin                 | RXRA   |
| Fuling  | FL5  | MOL000296 | TCMSP      | hederagenin                 | SCN5A  |
| Fuling  | FL5  | MOL000296 | TCMSP      | hederagenin                 | SLC6A2 |
| Fuling  | FL5  | MOL000296 | TCMSP      | hederagenin                 | CHRM3  |
| Fuling  | FL5  | MOL000296 | TCMSP      | hederagenin                 | NCOA2  |
| Fuling  | FL6  | MOL000275 | TCMSP      | trametenolic acid           | NR3C2  |
| Maidong | MD1  | 5317212   | BATMAN-TCM | 6-Aldehydo-Isoohipogonone B | NQO1   |
| Maidong | MD1  | 5317212   | BATMAN-TCM | 6-Aldehydo-Isoohipogonone B | VKORC1 |
| Maidong | MD10 | 5316797   | BATMAN-TCM | Ophiopogonanone E           | CNR2   |
| Maidong | MD10 | 5316797   | BATMAN-TCM | Ophiopogonanone E           | CNR1   |
| Maidong | MD10 | 5316797   | BATMAN-TCM | Ophiopogonanone E           | PAWR   |
| Maidong | MD10 | 5316797   | BATMAN-TCM | Ophiopogonanone E           | SOAT1  |
| Maidong | MD10 | 5316797   | BATMAN-TCM | Ophiopogonanone E           | SOAT2  |

|         |      |           |            |                   |         |
|---------|------|-----------|------------|-------------------|---------|
| Maidong | MD10 | 5316797   | BATMAN-TCM | Ophiopogonanone E | MTTP    |
| Maidong | MD10 | 5316797   | BATMAN-TCM | Ophiopogonanone E | DRD2    |
| Maidong | MD11 | 46173858  | BATMAN-TCM | Ophiopogonin A    | GLRA3   |
| Maidong | MD11 | 46173858  | BATMAN-TCM | Ophiopogonin A    | ATP1A1  |
| Maidong | MD11 | 46173858  | BATMAN-TCM | Ophiopogonin A    | GABRB3  |
| Maidong | MD12 | 46173857  | BATMAN-TCM | Ophiopogonin B    | ATP1A1  |
| Maidong | MD13 | 4483248   | BATMAN-TCM | Ophiopogonin C    | ATP1A1  |
| Maidong | MD14 | 46173859  | BATMAN-TCM | Ophiopogonin D    | ATP1A1  |
| Maidong | MD15 | 14826840  | BATMAN-TCM | Ophiopogonone B   | NQO1    |
| Maidong | MD15 | 14826840  | BATMAN-TCM | Ophiopogonone B   | VKORC1  |
| Maidong | MD16 | 181686    | BATMAN-TCM | Orchinol          | DCT     |
| Maidong | MD16 | 181686    | BATMAN-TCM | Orchinol          | TYRP1   |
| Maidong | MD16 | 181686    | BATMAN-TCM | Orchinol          | TYR     |
| Maidong | MD2  | 135398635 | BATMAN-TCM | Guanosine         | ADORA2A |
| Maidong | MD2  | 135398635 | BATMAN-TCM | Guanosine         | ADORA3  |

|         |     |           |            |                          |          |
|---------|-----|-----------|------------|--------------------------|----------|
| Maidong | MD2 | 135398635 | BATMAN-TCM | Guanosine                | ADORA 1  |
| Maidong | MD2 | 135398635 | BATMAN-TCM | Guanosine                | PNP      |
| Maidong | MD2 | 135398635 | BATMAN-TCM | Guanosine                | POLA1    |
| Maidong | MD2 | 135398635 | BATMAN-TCM | Guanosine                | POLB     |
| Maidong | MD2 | 135398635 | BATMAN-TCM | Guanosine                | DNMT1    |
| Maidong | MD2 | 135398635 | BATMAN-TCM | Guanosine                | ADORA 2B |
| Maidong | MD3 | 5318201   | BATMAN-TCM | Methyl Ophiopogonanone A | SOAT1    |
| Maidong | MD3 | 5318201   | BATMAN-TCM | Methyl Ophiopogonanone A | MTTP     |
| Maidong | MD3 | 5318201   | BATMAN-TCM | Methyl Ophiopogonanone A | CNR1     |
| Maidong | MD3 | 5318201   | BATMAN-TCM | Methyl Ophiopogonanone A | SOAT2    |
| Maidong | MD3 | 5318201   | BATMAN-TCM | Methyl Ophiopogonanone A | CNR2     |
| Maidong | MD4 | 5318201   | BATMAN-TCM | Methyl Ophiopogonanone B | PAWR     |
| Maidong | MD4 | 5318201   | BATMAN-TCM | Methyl Ophiopogonanone B | SOAT2    |
| Maidong | MD4 | 5318201   | BATMAN-TCM | Methyl Ophiopogonanone B | DRD2     |
| Maidong | MD4 | 5318201   | BATMAN-TCM | Methyl Ophiopogonanone B | CNR1     |

|         |     |          |            |                          |        |
|---------|-----|----------|------------|--------------------------|--------|
| Maidong | MD4 | 5318201  | BATMAN-TCM | Methyl Ophiopogonanone B | CNR2   |
| Maidong | MD4 | 5318201  | BATMAN-TCM | Methyl Ophiopogonanone B | SOAT1  |
| Maidong | MD4 | 5318201  | BATMAN-TCM | Methyl Ophiopogonanone B | MTTP   |
| Maidong | MD5 | 5280537  | BATMAN-TCM | N-Trans-Feruloyltyramine | MTNR1A |
| Maidong | MD5 | 5280537  | BATMAN-TCM | N-Trans-Feruloyltyramine | MTNR1B |
| Maidong | MD5 | 5280537  | BATMAN-TCM | N-Trans-Feruloyltyramine | HTR2C  |
| Maidong | MD6 | 11968810 | BATMAN-TCM | Ophiopogon A             | ATP1A1 |
| Maidong | MD6 | 11968810 | BATMAN-TCM | Ophiopogon A             | GABRB3 |
| Maidong | MD6 | 11968810 | BATMAN-TCM | Ophiopogon A             | GLRA3  |
| Maidong | MD7 | 46173857 | BATMAN-TCM | Ophiopogon B             | GABRB3 |
| Maidong | MD7 | 46173857 | BATMAN-TCM | Ophiopogon B             | ATP1A1 |
| Maidong | MD7 | 46173857 | BATMAN-TCM | Ophiopogon B             | GLRA3  |
| Maidong | MD8 | 9996586  | BATMAN-TCM | Ophiopogonanone A        | MTTP   |
| Maidong | MD8 | 9996586  | BATMAN-TCM | Ophiopogonanone A        | CNR2   |
| Maidong | MD8 | 9996586  | BATMAN-TCM | Ophiopogonanone A        | SOAT1  |

|               |         |          |            |                   |        |
|---------------|---------|----------|------------|-------------------|--------|
| Maidong       | MD8     | 9996586  | BATMAN-TCM | Ophiopogonanone A | SOAT2  |
| Maidong       | MD8     | 9996586  | BATMAN-TCM | Ophiopogonanone A | CNR1   |
| Maidong       | MD9     | 10871974 | BATMAN-TCM | Ophiopogonanone C | CNR1   |
| Maidong       | MD9     | 10871974 | BATMAN-TCM | Ophiopogonanone C | CNR2   |
| Maidong       | MD9     | 10871974 | BATMAN-TCM | Ophiopogonanone C | MTTP   |
| Maidong       | MD9     | 10871974 | BATMAN-TCM | Ophiopogonanone C | SOAT1  |
| Maidong       | MD9     | 10871974 | BATMAN-TCM | Ophiopogonanone C | SOAT2  |
| Shudi&Maidong | SD\$MD1 | 6029     | BATMAN-TCM | Uridine           | ADK    |
| Shudi&Maidong | SD\$MD1 | 6029     | BATMAN-TCM | Uridine           | ENPP1  |
| Shudi&Maidong | SD\$MD1 | 6029     | BATMAN-TCM | Uridine           | IMPDH1 |
| Shudi&Maidong | SD\$MD1 | 6029     | BATMAN-TCM | Uridine           | NT5C2  |
| Shudi&Maidong | SD\$MD1 | 6029     | BATMAN-TCM | Uridine           | PNP    |
| Shudi&Maidong | SD\$MD1 | 6029     | BATMAN-TCM | Uridine           | POLA1  |
| Shudi&Maidong | SD\$MD1 | 6029     | BATMAN-TCM | Uridine           | POLB   |
| Shudi&Maidong | SD\$MD1 | 6029     | BATMAN-TCM | Uridine           | TERT   |

|               |         |           |      |            |              |         |
|---------------|---------|-----------|------|------------|--------------|---------|
| Shudi&Maidong | SD\$MD1 |           | 6029 | BATMAN-TCM | Uridine      | TYMS    |
| Shudi&Maidong | SD\$MD2 | MOL000449 |      | TCMSP      | Stigmasterol | ADH1A   |
| Shudi&Maidong | SD\$MD2 | MOL000449 |      | TCMSP      | Stigmasterol | ADH1B   |
| Shudi&Maidong | SD\$MD2 | MOL000449 |      | TCMSP      | Stigmasterol | ADH1C   |
| Shudi&Maidong | SD\$MD2 | MOL000449 |      | TCMSP      | Stigmasterol | ADRA1A  |
| Shudi&Maidong | SD\$MD2 | MOL000449 |      | TCMSP      | Stigmasterol | ADRA1B  |
| Shudi&Maidong | SD\$MD2 | MOL000449 |      | TCMSP      | Stigmasterol | ADRA2A  |
| Shudi&Maidong | SD\$MD2 | MOL000449 |      | TCMSP      | Stigmasterol | ADRB1   |
| Shudi&Maidong | SD\$MD2 | MOL000449 |      | TCMSP      | Stigmasterol | ADRB2   |
| Shudi&Maidong | SD\$MD2 | MOL000449 |      | TCMSP      | Stigmasterol | AKR1B1  |
| Shudi&Maidong | SD\$MD2 | MOL000449 |      | TCMSP      | Stigmasterol | ALDH1A1 |
| Shudi&Maidong | SD\$MD2 | MOL000449 |      | TCMSP      | Stigmasterol | ALDH1A2 |
| Shudi&Maidong | SD\$MD2 | MOL000449 |      | TCMSP      | Stigmasterol | ALDH1A3 |
| Shudi&Maidong | SD\$MD2 | MOL000449 |      | TCMSP      | Stigmasterol | ALDH2   |
| Shudi&Maidong | SD\$MD2 | MOL000449 |      | TCMSP      | Stigmasterol | CAT     |



|               |         |           |       |              |         |
|---------------|---------|-----------|-------|--------------|---------|
| Shudi&Maidong | SD\$MD2 | MOL000449 | TCMSP | Stigmasterol | CHRM1   |
| Shudi&Maidong | SD\$MD2 | MOL000449 | TCMSP | Stigmasterol | CHRM2   |
| Shudi&Maidong | SD\$MD2 | MOL000449 | TCMSP | Stigmasterol | CHRM3   |
| Shudi&Maidong | SD\$MD2 | MOL000449 | TCMSP | Stigmasterol | CYP17A1 |
| Shudi&Maidong | SD\$MD2 | MOL000449 | TCMSP | Stigmasterol | DHRS3   |
| Shudi&Maidong | SD\$MD2 | MOL000449 | TCMSP | Stigmasterol | DLG4    |
| Shudi&Maidong | SD\$MD2 | MOL000449 | TCMSP | Stigmasterol | ESR1    |
| Shudi&Maidong | SD\$MD2 | MOL000449 | TCMSP | Stigmasterol | GABRA1  |
| Shudi&Maidong | SD\$MD2 | MOL000449 | TCMSP | Stigmasterol | GAMT    |
| Shudi&Maidong | SD\$MD2 | MOL000449 | TCMSP | Stigmasterol | GATM    |
| Shudi&Maidong | SD\$MD2 | MOL000449 | TCMSP | Stigmasterol | IYD     |
| Shudi&Maidong | SD\$MD2 | MOL000449 | TCMSP | Stigmasterol | KCNA1   |
| Shudi&Maidong | SD\$MD2 | MOL000449 | TCMSP | Stigmasterol | KCNA2   |
| Shudi&Maidong | SD\$MD2 | MOL000449 | TCMSP | Stigmasterol | KCNA4   |
| Shudi&Maidong | SD\$MD2 | MOL000449 | TCMSP | Stigmasterol | KCNA5   |

|               |         |           |       |              |       |
|---------------|---------|-----------|-------|--------------|-------|
| Shudi&Maidong | SD\$MD2 | MOL000449 | TCMSP | Stigmasterol | KCNB1 |
| Shudi&Maidong | SD\$MD2 | MOL000449 | TCMSP | Stigmasterol | KCNC1 |
| Shudi&Maidong | SD\$MD2 | MOL000449 | TCMSP | Stigmasterol | KCNC3 |
| Shudi&Maidong | SD\$MD2 | MOL000449 | TCMSP | Stigmasterol | KCND1 |
| Shudi&Maidong | SD\$MD2 | MOL000449 | TCMSP | Stigmasterol | KCND2 |
| Shudi&Maidong | SD\$MD2 | MOL000449 | TCMSP | Stigmasterol | KCND3 |
| Shudi&Maidong | SD\$MD2 | MOL000449 | TCMSP | Stigmasterol | KCNK4 |
| Shudi&Maidong | SD\$MD2 | MOL000449 | TCMSP | Stigmasterol | KCNQ1 |
| Shudi&Maidong | SD\$MD2 | MOL000449 | TCMSP | Stigmasterol | LRAT  |
| Shudi&Maidong | SD\$MD2 | MOL000449 | TCMSP | Stigmasterol | LTA4H |
| Shudi&Maidong | SD\$MD2 | MOL000449 | TCMSP | Stigmasterol | MAOA  |
| Shudi&Maidong | SD\$MD2 | MOL000449 | TCMSP | Stigmasterol | MAOB  |
| Shudi&Maidong | SD\$MD2 | MOL000449 | TCMSP | Stigmasterol | NCOA1 |
| Shudi&Maidong | SD\$MD2 | MOL000449 | TCMSP | Stigmasterol | NCOA2 |
| Shudi&Maidong | SD\$MD2 | MOL000449 | TCMSP | Stigmasterol | NR3C2 |

|               |         |           |       |              |        |
|---------------|---------|-----------|-------|--------------|--------|
| Shudi&Maidong | SD\$MD2 | MOL000449 | TCMSP | Stigmasterol | OPRK1  |
| Shudi&Maidong | SD\$MD2 | MOL000449 | TCMSP | Stigmasterol | PGR    |
| Shudi&Maidong | SD\$MD2 | MOL000449 | TCMSP | Stigmasterol | PLAU   |
| Shudi&Maidong | SD\$MD2 | MOL000449 | TCMSP | Stigmasterol | PRKAB1 |
| Shudi&Maidong | SD\$MD2 | MOL000449 | TCMSP | Stigmasterol | PTGS1  |
| Shudi&Maidong | SD\$MD2 | MOL000449 | TCMSP | Stigmasterol | PTGS2  |
| Shudi&Maidong | SD\$MD2 | MOL000449 | TCMSP | Stigmasterol | RBP1   |
| Shudi&Maidong | SD\$MD2 | MOL000449 | TCMSP | Stigmasterol | RBP3   |
| Shudi&Maidong | SD\$MD2 | MOL000449 | TCMSP | Stigmasterol | RDH12  |
| Shudi&Maidong | SD\$MD2 | MOL000449 | TCMSP | Stigmasterol | RDH5   |
| Shudi&Maidong | SD\$MD2 | MOL000449 | TCMSP | Stigmasterol | RLBP1  |
| Shudi&Maidong | SD\$MD2 | MOL000449 | TCMSP | Stigmasterol | RNASE1 |
| Shudi&Maidong | SD\$MD2 | MOL000449 | TCMSP | Stigmasterol | RXRA   |
| Shudi&Maidong | SD\$MD2 | MOL000449 | TCMSP | Stigmasterol | SCN5A  |
| Shudi&Maidong | SD\$MD2 | MOL000449 | TCMSP | Stigmasterol | SLC6A2 |

|               |         |           |            |                                              |         |
|---------------|---------|-----------|------------|----------------------------------------------|---------|
| Shudi&Maidong | SD\$MD2 | MOL000449 | TCMSP      | Stigmasterol                                 | SLC6A3  |
| Shudi&Maidong | SD\$MD2 | MOL000449 | TCMSP      | Stigmasterol                                 | TPO     |
| Wuweizi       | WWZ1    | 73057     | BATMAN-TCM | (+)-Gomisin K3                               | TYR     |
| Wuweizi       | WWZ1    | 73057     | BATMAN-TCM | (+)-Gomisin K3                               | TYRP1   |
| Wuweizi       | WWZ1    | 73057     | BATMAN-TCM | (+)-Gomisin K3                               | DCT     |
| Wuweizi       | WWZ10   | 5318635   | BATMAN-TCM | (E)-9-Isopropyl-6-Methyl-5,9-Decadiene-2-One | ADA     |
| Wuweizi       | WWZ10   | 5318635   | BATMAN-TCM | (E)-9-Isopropyl-6-Methyl-5,9-Decadiene-2-One | ADORA1  |
| Wuweizi       | WWZ10   | 5318635   | BATMAN-TCM | (E)-9-Isopropyl-6-Methyl-5,9-Decadiene-2-One | ADORA2A |
| Wuweizi       | WWZ10   | 5318635   | BATMAN-TCM | (E)-9-Isopropyl-6-Methyl-5,9-Decadiene-2-One | ADORA2B |
| Wuweizi       | WWZ10   | 5318635   | BATMAN-TCM | (E)-9-Isopropyl-6-Methyl-5,9-Decadiene-2-One | AMPD3   |
| Wuweizi       | WWZ10   | 5318635   | BATMAN-TCM | (E)-9-Isopropyl-6-Methyl-5,9-Decadiene-2-One | ATM     |
| Wuweizi       | WWZ10   | 5318635   | BATMAN-TCM | (E)-9-Isopropyl-6-Methyl-5,9-Decadiene-2-One | CX3CR1  |
| Wuweizi       | WWZ10   | 5318635   | BATMAN-TCM | (E)-9-Isopropyl-6-Methyl-5,9-Decadiene-2-One | CYP17A1 |
| Wuweizi       | WWZ10   | 5318635   | BATMAN-TCM | (E)-9-Isopropyl-6-Methyl-5,9-Decadiene-2-One | CYP19A1 |
| Wuweizi       | WWZ10   | 5318635   | BATMAN-TCM | (E)-9-Isopropyl-6-Methyl-5,9-Decadiene-2-One | ESR1    |

|         |       |         |            |                                              |        |
|---------|-------|---------|------------|----------------------------------------------|--------|
| Wuweizi | WWZ10 | 5318635 | BATMAN-TCM | (E)-9-Isopropyl-6-Methyl-5,9-Decadiene-2-One | HAP1   |
| Wuweizi | WWZ10 | 5318635 | BATMAN-TCM | (E)-9-Isopropyl-6-Methyl-5,9-Decadiene-2-One | HDAC2  |
| Wuweizi | WWZ10 | 5318635 | BATMAN-TCM | (E)-9-Isopropyl-6-Methyl-5,9-Decadiene-2-One | IDNK   |
| Wuweizi | WWZ10 | 5318635 | BATMAN-TCM | (E)-9-Isopropyl-6-Methyl-5,9-Decadiene-2-One | ITPR1  |
| Wuweizi | WWZ10 | 5318635 | BATMAN-TCM | (E)-9-Isopropyl-6-Methyl-5,9-Decadiene-2-One | ITPR2  |
| Wuweizi | WWZ10 | 5318635 | BATMAN-TCM | (E)-9-Isopropyl-6-Methyl-5,9-Decadiene-2-One | ITPR3  |
| Wuweizi | WWZ10 | 5318635 | BATMAN-TCM | (E)-9-Isopropyl-6-Methyl-5,9-Decadiene-2-One | NR3C2  |
| Wuweizi | WWZ10 | 5318635 | BATMAN-TCM | (E)-9-Isopropyl-6-Methyl-5,9-Decadiene-2-One | NT5E   |
| Wuweizi | WWZ10 | 5318635 | BATMAN-TCM | (E)-9-Isopropyl-6-Methyl-5,9-Decadiene-2-One | OPRK1  |
| Wuweizi | WWZ10 | 5318635 | BATMAN-TCM | (E)-9-Isopropyl-6-Methyl-5,9-Decadiene-2-One | PDE10A |
| Wuweizi | WWZ10 | 5318635 | BATMAN-TCM | (E)-9-Isopropyl-6-Methyl-5,9-Decadiene-2-One | PDE11A |
| Wuweizi | WWZ10 | 5318635 | BATMAN-TCM | (E)-9-Isopropyl-6-Methyl-5,9-Decadiene-2-One | PDE2A  |
| Wuweizi | WWZ10 | 5318635 | BATMAN-TCM | (E)-9-Isopropyl-6-Methyl-5,9-Decadiene-2-One | PDE3A  |
| Wuweizi | WWZ10 | 5318635 | BATMAN-TCM | (E)-9-Isopropyl-6-Methyl-5,9-Decadiene-2-One | PDE3B  |
| Wuweizi | WWZ10 | 5318635 | BATMAN-TCM | (E)-9-Isopropyl-6-Methyl-5,9-Decadiene-2-One | PDE4A  |

|         |       |         |            |                                              |        |
|---------|-------|---------|------------|----------------------------------------------|--------|
| Wuweizi | WWZ10 | 5318635 | BATMAN-TCM | (E)-9-Isopropyl-6-Methyl-5,9-Decadiene-2-One | PDE4B  |
| Wuweizi | WWZ10 | 5318635 | BATMAN-TCM | (E)-9-Isopropyl-6-Methyl-5,9-Decadiene-2-One | PDE4C  |
| Wuweizi | WWZ10 | 5318635 | BATMAN-TCM | (E)-9-Isopropyl-6-Methyl-5,9-Decadiene-2-One | PDE4D  |
| Wuweizi | WWZ10 | 5318635 | BATMAN-TCM | (E)-9-Isopropyl-6-Methyl-5,9-Decadiene-2-One | PDE5A  |
| Wuweizi | WWZ10 | 5318635 | BATMAN-TCM | (E)-9-Isopropyl-6-Methyl-5,9-Decadiene-2-One | PDE6A  |
| Wuweizi | WWZ10 | 5318635 | BATMAN-TCM | (E)-9-Isopropyl-6-Methyl-5,9-Decadiene-2-One | PDE6C  |
| Wuweizi | WWZ10 | 5318635 | BATMAN-TCM | (E)-9-Isopropyl-6-Methyl-5,9-Decadiene-2-One | PDE8B  |
| Wuweizi | WWZ10 | 5318635 | BATMAN-TCM | (E)-9-Isopropyl-6-Methyl-5,9-Decadiene-2-One | PGD    |
| Wuweizi | WWZ10 | 5318635 | BATMAN-TCM | (E)-9-Isopropyl-6-Methyl-5,9-Decadiene-2-One | PGR    |
| Wuweizi | WWZ10 | 5318635 | BATMAN-TCM | (E)-9-Isopropyl-6-Methyl-5,9-Decadiene-2-One | PIK3CA |
| Wuweizi | WWZ10 | 5318635 | BATMAN-TCM | (E)-9-Isopropyl-6-Methyl-5,9-Decadiene-2-One | PIK3CB |
| Wuweizi | WWZ10 | 5318635 | BATMAN-TCM | (E)-9-Isopropyl-6-Methyl-5,9-Decadiene-2-One | PIK3CD |
| Wuweizi | WWZ10 | 5318635 | BATMAN-TCM | (E)-9-Isopropyl-6-Methyl-5,9-Decadiene-2-One | PIK3R1 |
| Wuweizi | WWZ10 | 5318635 | BATMAN-TCM | (E)-9-Isopropyl-6-Methyl-5,9-Decadiene-2-One | PRKDC  |
| Wuweizi | WWZ10 | 5318635 | BATMAN-TCM | (E)-9-Isopropyl-6-Methyl-5,9-Decadiene-2-One | RINT1  |

|         |       |         |            |                                              |          |
|---------|-------|---------|------------|----------------------------------------------|----------|
| Wuweizi | WWZ10 | 5318635 | BATMAN-TCM | (E)-9-Isopropyl-6-Methyl-5,9-Decadiene-2-One | RIPK1    |
| Wuweizi | WWZ10 | 5318635 | BATMAN-TCM | (E)-9-Isopropyl-6-Methyl-5,9-Decadiene-2-One | RYR1     |
| Wuweizi | WWZ10 | 5318635 | BATMAN-TCM | (E)-9-Isopropyl-6-Methyl-5,9-Decadiene-2-One | TACR2    |
| Wuweizi | WWZ10 | 5318635 | BATMAN-TCM | (E)-9-Isopropyl-6-Methyl-5,9-Decadiene-2-One | WNT4     |
| Wuweizi | WWZ11 | 6857681 | BATMAN-TCM | Beta-Santalol                                | ALDH1 A1 |
| Wuweizi | WWZ11 | 6857681 | BATMAN-TCM | Beta-Santalol                                | ALDH1 A2 |
| Wuweizi | WWZ11 | 6857681 | BATMAN-TCM | Beta-Santalol                                | ALDH1 A3 |
| Wuweizi | WWZ11 | 6857681 | BATMAN-TCM | Beta-Santalol                                | ALDH3 A1 |
| Wuweizi | WWZ11 | 6857681 | BATMAN-TCM | Beta-Santalol                                | DHRS3    |
| Wuweizi | WWZ11 | 6857681 | BATMAN-TCM | Beta-Santalol                                | LRAT     |
| Wuweizi | WWZ11 | 6857681 | BATMAN-TCM | Beta-Santalol                                | RBP1     |
| Wuweizi | WWZ11 | 6857681 | BATMAN-TCM | Beta-Santalol                                | RBP3     |
| Wuweizi | WWZ11 | 6857681 | BATMAN-TCM | Beta-Santalol                                | RDH12    |
| Wuweizi | WWZ11 | 6857681 | BATMAN-TCM | Beta-Santalol                                | RDH5     |
| Wuweizi | WWZ11 | 6857681 | BATMAN-TCM | Beta-Santalol                                | RHO      |

|         |       |          |            |                         |         |
|---------|-------|----------|------------|-------------------------|---------|
| Wuweizi | WWZ11 | 6857681  | BATMAN-TCM | Beta-Santalol           | RLBP1   |
| Wuweizi | WWZ11 | 6857681  | BATMAN-TCM | Beta-Santalol           | RS1     |
| Wuweizi | WWZ12 | 12315492 | BATMAN-TCM | Beta-Sesquiphellandrene | ADH1A   |
| Wuweizi | WWZ12 | 12315492 | BATMAN-TCM | Beta-Sesquiphellandrene | ADH1B   |
| Wuweizi | WWZ12 | 12315492 | BATMAN-TCM | Beta-Sesquiphellandrene | ADH1C   |
| Wuweizi | WWZ12 | 12315492 | BATMAN-TCM | Beta-Sesquiphellandrene | ALDH1A1 |
| Wuweizi | WWZ12 | 12315492 | BATMAN-TCM | Beta-Sesquiphellandrene | ALDH1A2 |
| Wuweizi | WWZ12 | 12315492 | BATMAN-TCM | Beta-Sesquiphellandrene | ALDH1A3 |
| Wuweizi | WWZ12 | 12315492 | BATMAN-TCM | Beta-Sesquiphellandrene | ALDH2   |
| Wuweizi | WWZ12 | 12315492 | BATMAN-TCM | Beta-Sesquiphellandrene | CAT     |
| Wuweizi | WWZ12 | 12315492 | BATMAN-TCM | Beta-Sesquiphellandrene | DHRS3   |
| Wuweizi | WWZ12 | 12315492 | BATMAN-TCM | Beta-Sesquiphellandrene | DLG4    |
| Wuweizi | WWZ12 | 12315492 | BATMAN-TCM | Beta-Sesquiphellandrene | ESR1    |
| Wuweizi | WWZ12 | 12315492 | BATMAN-TCM | Beta-Sesquiphellandrene | GAMT    |
| Wuweizi | WWZ12 | 12315492 | BATMAN-TCM | Beta-Sesquiphellandrene | GATM    |



|         |       |          |            |                         |       |
|---------|-------|----------|------------|-------------------------|-------|
| Wuweizi | WWZ12 | 12315492 | BATMAN-TCM | Beta-Sesquiphellandrene | IYD   |
| Wuweizi | WWZ12 | 12315492 | BATMAN-TCM | Beta-Sesquiphellandrene | KCNA1 |
| Wuweizi | WWZ12 | 12315492 | BATMAN-TCM | Beta-Sesquiphellandrene | KCNA2 |
| Wuweizi | WWZ12 | 12315492 | BATMAN-TCM | Beta-Sesquiphellandrene | KCNA4 |
| Wuweizi | WWZ12 | 12315492 | BATMAN-TCM | Beta-Sesquiphellandrene | KCNA5 |
| Wuweizi | WWZ12 | 12315492 | BATMAN-TCM | Beta-Sesquiphellandrene | KCNB1 |
| Wuweizi | WWZ12 | 12315492 | BATMAN-TCM | Beta-Sesquiphellandrene | KCNC1 |
| Wuweizi | WWZ12 | 12315492 | BATMAN-TCM | Beta-Sesquiphellandrene | KCNC3 |
| Wuweizi | WWZ12 | 12315492 | BATMAN-TCM | Beta-Sesquiphellandrene | KCND1 |
| Wuweizi | WWZ12 | 12315492 | BATMAN-TCM | Beta-Sesquiphellandrene | KCND2 |
| Wuweizi | WWZ12 | 12315492 | BATMAN-TCM | Beta-Sesquiphellandrene | KCND3 |
| Wuweizi | WWZ12 | 12315492 | BATMAN-TCM | Beta-Sesquiphellandrene | KCNK4 |
| Wuweizi | WWZ12 | 12315492 | BATMAN-TCM | Beta-Sesquiphellandrene | KCNQ1 |
| Wuweizi | WWZ12 | 12315492 | BATMAN-TCM | Beta-Sesquiphellandrene | LRAT  |
| Wuweizi | WWZ12 | 12315492 | BATMAN-TCM | Beta-Sesquiphellandrene | PGR   |

|         |       |          |            |                         |        |
|---------|-------|----------|------------|-------------------------|--------|
| Wuweizi | WWZ12 | 12315492 | BATMAN-TCM | Beta-Sesquiphellandrene | PRKAB1 |
| Wuweizi | WWZ12 | 12315492 | BATMAN-TCM | Beta-Sesquiphellandrene | RBP1   |
| Wuweizi | WWZ12 | 12315492 | BATMAN-TCM | Beta-Sesquiphellandrene | RBP3   |
| Wuweizi | WWZ12 | 12315492 | BATMAN-TCM | Beta-Sesquiphellandrene | RDH12  |
| Wuweizi | WWZ12 | 12315492 | BATMAN-TCM | Beta-Sesquiphellandrene | RDH5   |
| Wuweizi | WWZ12 | 12315492 | BATMAN-TCM | Beta-Sesquiphellandrene | RLBP1  |
| Wuweizi | WWZ12 | 12315492 | BATMAN-TCM | Beta-Sesquiphellandrene | RNASE1 |
| Wuweizi | WWZ12 | 12315492 | BATMAN-TCM | Beta-Sesquiphellandrene | TPO    |
| Wuweizi | WWZ13 | 6616     | BATMAN-TCM | Camphene                | ADH1A  |
| Wuweizi | WWZ13 | 6616     | BATMAN-TCM | Camphene                | ADH1B  |
| Wuweizi | WWZ13 | 6616     | BATMAN-TCM | Camphene                | ADH1C  |
| Wuweizi | WWZ13 | 6616     | BATMAN-TCM | Camphene                | ALDH2  |
| Wuweizi | WWZ13 | 6616     | BATMAN-TCM | Camphene                | CAT    |
| Wuweizi | WWZ13 | 6616     | BATMAN-TCM | Camphene                | DLG4   |
| Wuweizi | WWZ13 | 6616     | BATMAN-TCM | Camphene                | GAMT   |

|         |       |      |            |          |        |
|---------|-------|------|------------|----------|--------|
| Wuweizi | WWZ13 | 6616 | BATMAN-TCM | Camphene | GATM   |
| Wuweizi | WWZ13 | 6616 | BATMAN-TCM | Camphene | IYD    |
| Wuweizi | WWZ13 | 6616 | BATMAN-TCM | Camphene | KCNA1  |
| Wuweizi | WWZ13 | 6616 | BATMAN-TCM | Camphene | KCNA2  |
| Wuweizi | WWZ13 | 6616 | BATMAN-TCM | Camphene | KCNA4  |
| Wuweizi | WWZ13 | 6616 | BATMAN-TCM | Camphene | KCNA5  |
| Wuweizi | WWZ13 | 6616 | BATMAN-TCM | Camphene | KCNB1  |
| Wuweizi | WWZ13 | 6616 | BATMAN-TCM | Camphene | KCNC1  |
| Wuweizi | WWZ13 | 6616 | BATMAN-TCM | Camphene | KCNC3  |
| Wuweizi | WWZ13 | 6616 | BATMAN-TCM | Camphene | KCND1  |
| Wuweizi | WWZ13 | 6616 | BATMAN-TCM | Camphene | KCND2  |
| Wuweizi | WWZ13 | 6616 | BATMAN-TCM | Camphene | KCND3  |
| Wuweizi | WWZ13 | 6616 | BATMAN-TCM | Camphene | KCNK4  |
| Wuweizi | WWZ13 | 6616 | BATMAN-TCM | Camphene | KCNQ1  |
| Wuweizi | WWZ13 | 6616 | BATMAN-TCM | Camphene | PRKAB1 |

|         |       |          |            |                       |         |
|---------|-------|----------|------------|-----------------------|---------|
| Wuweizi | WWZ13 | 6616     | BATMAN-TCM | Camphene              | RNASE1  |
| Wuweizi | WWZ13 | 6616     | BATMAN-TCM | Camphene              | TPO     |
| Wuweizi | WWZ14 | 91747494 | BATMAN-TCM | Campherenol           | CYP27B1 |
| Wuweizi | WWZ14 | 91747494 | BATMAN-TCM | Campherenol           | ESR1    |
| Wuweizi | WWZ14 | 91747494 | BATMAN-TCM | Campherenol           | F12     |
| Wuweizi | WWZ14 | 91747494 | BATMAN-TCM | Campherenol           | GC      |
| Wuweizi | WWZ14 | 91747494 | BATMAN-TCM | Campherenol           | PGR     |
| Wuweizi | WWZ14 | 91747494 | BATMAN-TCM | Campherenol           | SNW1    |
| Wuweizi | WWZ14 | 91747494 | BATMAN-TCM | Campherenol           | VDR     |
| Wuweizi | WWZ15 | 5281433  | BATMAN-TCM | Chamissonin Diacetate | CHRM1   |
| Wuweizi | WWZ15 | 5281433  | BATMAN-TCM | Chamissonin Diacetate | CHRM2   |
| Wuweizi | WWZ15 | 5281433  | BATMAN-TCM | Chamissonin Diacetate | CHRM3   |
| Wuweizi | WWZ15 | 5281433  | BATMAN-TCM | Chamissonin Diacetate | HDAC2   |
| Wuweizi | WWZ15 | 5281433  | BATMAN-TCM | Chamissonin Diacetate | HMGCR   |
| Wuweizi | WWZ15 | 5281433  | BATMAN-TCM | Chamissonin Diacetate | ITGAL   |

|         |       |         |            |                       |          |
|---------|-------|---------|------------|-----------------------|----------|
| Wuweizi | WWZ15 | 5281433 | BATMAN-TCM | Chamissonin Diacetate | ITGB2    |
| Wuweizi | WWZ15 | 5281433 | BATMAN-TCM | Chamissonin Diacetate | NR3C2    |
| Wuweizi | WWZ15 | 5281433 | BATMAN-TCM | Chamissonin Diacetate | PRKCA    |
| Wuweizi | WWZ15 | 5281433 | BATMAN-TCM | Chamissonin Diacetate | PRKCD    |
| Wuweizi | WWZ16 | 638011  | BATMAN-TCM | Citral                | ACHE     |
| Wuweizi | WWZ16 | 638011  | BATMAN-TCM | Citral                | BCHE     |
| Wuweizi | WWZ16 | 638011  | BATMAN-TCM | Citral                | COLQ     |
| Wuweizi | WWZ17 | 9845703 | BATMAN-TCM | Citraurin Beta        | ALDH1 A1 |
| Wuweizi | WWZ17 | 9845703 | BATMAN-TCM | Citraurin Beta        | ALDH1 A2 |
| Wuweizi | WWZ17 | 9845703 | BATMAN-TCM | Citraurin Beta        | ALDH1 A3 |
| Wuweizi | WWZ17 | 9845703 | BATMAN-TCM | Citraurin Beta        | CYP27B 1 |
| Wuweizi | WWZ17 | 9845703 | BATMAN-TCM | Citraurin Beta        | DHRS3    |
| Wuweizi | WWZ17 | 9845703 | BATMAN-TCM | Citraurin Beta        | GPRC5 A  |
| Wuweizi | WWZ17 | 9845703 | BATMAN-TCM | Citraurin Beta        | LRAT     |
| Wuweizi | WWZ17 | 9845703 | BATMAN-TCM | Citraurin Beta        | NR0B1    |

|         |       |         |            |                |             |
|---------|-------|---------|------------|----------------|-------------|
| Wuweizi | WWZ17 | 9845703 | BATMAN-TCM | Citraurin Beta | PGR         |
| Wuweizi | WWZ17 | 9845703 | BATMAN-TCM | Citraurin Beta | RARA        |
| Wuweizi | WWZ17 | 9845703 | BATMAN-TCM | Citraurin Beta | RARB        |
| Wuweizi | WWZ17 | 9845703 | BATMAN-TCM | Citraurin Beta | RARG        |
| Wuweizi | WWZ17 | 9845703 | BATMAN-TCM | Citraurin Beta | RARRES<br>1 |
| Wuweizi | WWZ17 | 9845703 | BATMAN-TCM | Citraurin Beta | RBP1        |
| Wuweizi | WWZ17 | 9845703 | BATMAN-TCM | Citraurin Beta | RBP3        |
| Wuweizi | WWZ17 | 9845703 | BATMAN-TCM | Citraurin Beta | RDH12       |
| Wuweizi | WWZ17 | 9845703 | BATMAN-TCM | Citraurin Beta | RDH5        |
| Wuweizi | WWZ17 | 9845703 | BATMAN-TCM | Citraurin Beta | RLBP1       |
| Wuweizi | WWZ17 | 9845703 | BATMAN-TCM | Citraurin Beta | RXRA        |
| Wuweizi | WWZ17 | 9845703 | BATMAN-TCM | Citraurin Beta | RXRB        |
| Wuweizi | WWZ17 | 9845703 | BATMAN-TCM | Citraurin Beta | RXRG        |
| Wuweizi | WWZ17 | 9845703 | BATMAN-TCM | Citraurin Beta | VDR         |
| Wuweizi | WWZ18 | 8842    | BATMAN-TCM | Citronellol    | ALDH1<br>A1 |

|         |       |      |            |             |          |
|---------|-------|------|------------|-------------|----------|
| Wuweizi | WWZ18 | 8842 | BATMAN-TCM | Citronellol | ALDH1 A2 |
| Wuweizi | WWZ18 | 8842 | BATMAN-TCM | Citronellol | ALDH1 A3 |
| Wuweizi | WWZ18 | 8842 | BATMAN-TCM | Citronellol | ALDH3 A1 |
| Wuweizi | WWZ18 | 8842 | BATMAN-TCM | Citronellol | DHRS3    |
| Wuweizi | WWZ18 | 8842 | BATMAN-TCM | Citronellol | ESR1     |
| Wuweizi | WWZ18 | 8842 | BATMAN-TCM | Citronellol | F12      |
| Wuweizi | WWZ18 | 8842 | BATMAN-TCM | Citronellol | LRAT     |
| Wuweizi | WWZ18 | 8842 | BATMAN-TCM | Citronellol | PGR      |
| Wuweizi | WWZ18 | 8842 | BATMAN-TCM | Citronellol | RBP1     |
| Wuweizi | WWZ18 | 8842 | BATMAN-TCM | Citronellol | RBP3     |
| Wuweizi | WWZ18 | 8842 | BATMAN-TCM | Citronellol | RDH12    |
| Wuweizi | WWZ18 | 8842 | BATMAN-TCM | Citronellol | RDH5     |
| Wuweizi | WWZ18 | 8842 | BATMAN-TCM | Citronellol | RHO      |
| Wuweizi | WWZ18 | 8842 | BATMAN-TCM | Citronellol | RLBP1    |
| Wuweizi | WWZ18 | 8842 | BATMAN-TCM | Citronellol | RS1      |

|         |       |       |            |                     |            |
|---------|-------|-------|------------|---------------------|------------|
| Wuweizi | WWZ19 | 9017  | BATMAN-TCM | Citronellyl Acetate | AR         |
| Wuweizi | WWZ19 | 9017  | BATMAN-TCM | Citronellyl Acetate | ESR1       |
| Wuweizi | WWZ19 | 9017  | BATMAN-TCM | Citronellyl Acetate | NR3C2      |
| Wuweizi | WWZ19 | 9017  | BATMAN-TCM | Citronellyl Acetate | PGR        |
| Wuweizi | WWZ2  | 20740 | BATMAN-TCM | 3-Phenyldecane      | ADRA1<br>A |
| Wuweizi | WWZ2  | 20740 | BATMAN-TCM | 3-Phenyldecane      | ADRA1<br>B |
| Wuweizi | WWZ2  | 20740 | BATMAN-TCM | 3-Phenyldecane      | ADRA2<br>A |
| Wuweizi | WWZ2  | 20740 | BATMAN-TCM | 3-Phenyldecane      | ADRA2<br>B |
| Wuweizi | WWZ2  | 20740 | BATMAN-TCM | 3-Phenyldecane      | ADRA2<br>C |
| Wuweizi | WWZ2  | 20740 | BATMAN-TCM | 3-Phenyldecane      | ADRB1      |
| Wuweizi | WWZ2  | 20740 | BATMAN-TCM | 3-Phenyldecane      | ADRB2      |
| Wuweizi | WWZ2  | 20740 | BATMAN-TCM | 3-Phenyldecane      | ADRB3      |
| Wuweizi | WWZ2  | 20740 | BATMAN-TCM | 3-Phenyldecane      | ALOX5      |
| Wuweizi | WWZ2  | 20740 | BATMAN-TCM | 3-Phenyldecane      | CARTPT     |
| Wuweizi | WWZ2  | 20740 | BATMAN-TCM | 3-Phenyldecane      | DRD2       |



|         |       |       |            |                                             |         |
|---------|-------|-------|------------|---------------------------------------------|---------|
| Wuweizi | WWZ2  | 20740 | BATMAN-TCM | 3-Phenyldecane                              | F2      |
| Wuweizi | WWZ2  | 20740 | BATMAN-TCM | 3-Phenyldecane                              | GABRB2  |
| Wuweizi | WWZ2  | 20740 | BATMAN-TCM | 3-Phenyldecane                              | GABRB3  |
| Wuweizi | WWZ2  | 20740 | BATMAN-TCM | 3-Phenyldecane                              | MAOA    |
| Wuweizi | WWZ2  | 20740 | BATMAN-TCM | 3-Phenyldecane                              | MAOB    |
| Wuweizi | WWZ2  | 20740 | BATMAN-TCM | 3-Phenyldecane                              | S1PR5   |
| Wuweizi | WWZ2  | 20740 | BATMAN-TCM | 3-Phenyldecane                              | SLC18A2 |
| Wuweizi | WWZ2  | 20740 | BATMAN-TCM | 3-Phenyldecane                              | SLC6A2  |
| Wuweizi | WWZ2  | 20740 | BATMAN-TCM | 3-Phenyldecane                              | SLC6A3  |
| Wuweizi | WWZ2  | 20740 | BATMAN-TCM | 3-Phenyldecane                              | SLC6A4  |
| Wuweizi | WWZ20 | 92139 | BATMAN-TCM | 1-(1,5-Dimethyl-4-Hexenyl)-4-Methyl Benzene | GATM    |
| Wuweizi | WWZ20 | 92139 | BATMAN-TCM | 1-(1,5-Dimethyl-4-Hexenyl)-4-Methyl Benzene | ADH1C   |
| Wuweizi | WWZ20 | 92139 | BATMAN-TCM | 1-(1,5-Dimethyl-4-Hexenyl)-4-Methyl Benzene | PRKAB1  |
| Wuweizi | WWZ20 | 92139 | BATMAN-TCM | 1-(1,5-Dimethyl-4-Hexenyl)-4-Methyl Benzene | ADH1B   |
| Wuweizi | WWZ20 | 92139 | BATMAN-TCM | 1-(1,5-Dimethyl-4-Hexenyl)-4-Methyl Benzene | GAMT    |

|         |       |       |            |                                             |        |
|---------|-------|-------|------------|---------------------------------------------|--------|
| Wuweizi | WWZ20 | 92139 | BATMAN-TCM | 1-(1,5-Dimethyl-4-Hexenyl)-4-Methyl Benzene | KCNB1  |
| Wuweizi | WWZ20 | 92139 | BATMAN-TCM | 1-(1,5-Dimethyl-4-Hexenyl)-4-Methyl Benzene | KCNC3  |
| Wuweizi | WWZ20 | 92139 | BATMAN-TCM | 1-(1,5-Dimethyl-4-Hexenyl)-4-Methyl Benzene | KCND1  |
| Wuweizi | WWZ20 | 92139 | BATMAN-TCM | 1-(1,5-Dimethyl-4-Hexenyl)-4-Methyl Benzene | CAT    |
| Wuweizi | WWZ20 | 92139 | BATMAN-TCM | 1-(1,5-Dimethyl-4-Hexenyl)-4-Methyl Benzene | KCND2  |
| Wuweizi | WWZ20 | 92139 | BATMAN-TCM | 1-(1,5-Dimethyl-4-Hexenyl)-4-Methyl Benzene | KCNA1  |
| Wuweizi | WWZ20 | 92139 | BATMAN-TCM | 1-(1,5-Dimethyl-4-Hexenyl)-4-Methyl Benzene | KCNK4  |
| Wuweizi | WWZ20 | 92139 | BATMAN-TCM | 1-(1,5-Dimethyl-4-Hexenyl)-4-Methyl Benzene | ADH1A  |
| Wuweizi | WWZ20 | 92139 | BATMAN-TCM | 1-(1,5-Dimethyl-4-Hexenyl)-4-Methyl Benzene | KCNA5  |
| Wuweizi | WWZ20 | 92139 | BATMAN-TCM | 1-(1,5-Dimethyl-4-Hexenyl)-4-Methyl Benzene | TPO    |
| Wuweizi | WWZ20 | 92139 | BATMAN-TCM | 1-(1,5-Dimethyl-4-Hexenyl)-4-Methyl Benzene | DLG4   |
| Wuweizi | WWZ20 | 92139 | BATMAN-TCM | 1-(1,5-Dimethyl-4-Hexenyl)-4-Methyl Benzene | KCNC1  |
| Wuweizi | WWZ20 | 92139 | BATMAN-TCM | 1-(1,5-Dimethyl-4-Hexenyl)-4-Methyl Benzene | ALDH2  |
| Wuweizi | WWZ20 | 92139 | BATMAN-TCM | 1-(1,5-Dimethyl-4-Hexenyl)-4-Methyl Benzene | RNASE1 |
| Wuweizi | WWZ20 | 92139 | BATMAN-TCM | 1-(1,5-Dimethyl-4-Hexenyl)-4-Methyl Benzene | IYD    |

|         |       |       |            |                                             |       |
|---------|-------|-------|------------|---------------------------------------------|-------|
| Wuweizi | WWZ20 | 92139 | BATMAN-TCM | 1-(1,5-Dimethyl-4-Hexenyl)-4-Methyl Benzene | KCND3 |
| Wuweizi | WWZ20 | 92139 | BATMAN-TCM | 1-(1,5-Dimethyl-4-Hexenyl)-4-Methyl Benzene | KCNQ1 |
| Wuweizi | WWZ20 | 92139 | BATMAN-TCM | 1-(1,5-Dimethyl-4-Hexenyl)-4-Methyl Benzene | KCNA4 |
| Wuweizi | WWZ20 | 92139 | BATMAN-TCM | 1-(1,5-Dimethyl-4-Hexenyl)-4-Methyl Benzene | KCNA2 |
| Wuweizi | WWZ21 | 10102 | BATMAN-TCM | Clovene                                     | ADH1A |
| Wuweizi | WWZ21 | 10102 | BATMAN-TCM | Clovene                                     | ADH1B |
| Wuweizi | WWZ21 | 10102 | BATMAN-TCM | Clovene                                     | ADH1C |
| Wuweizi | WWZ21 | 10102 | BATMAN-TCM | Clovene                                     | ALDH2 |
| Wuweizi | WWZ21 | 10102 | BATMAN-TCM | Clovene                                     | CAT   |
| Wuweizi | WWZ21 | 10102 | BATMAN-TCM | Clovene                                     | DLG4  |
| Wuweizi | WWZ21 | 10102 | BATMAN-TCM | Clovene                                     | GAMT  |
| Wuweizi | WWZ21 | 10102 | BATMAN-TCM | Clovene                                     | GATM  |
| Wuweizi | WWZ21 | 10102 | BATMAN-TCM | Clovene                                     | IYD   |
| Wuweizi | WWZ21 | 10102 | BATMAN-TCM | Clovene                                     | KCNA1 |
| Wuweizi | WWZ21 | 10102 | BATMAN-TCM | Clovene                                     | KCNA2 |

|         |       |         |            |                   |         |
|---------|-------|---------|------------|-------------------|---------|
| Wuweizi | WWZ21 | 10102   | BATMAN-TCM | Clovene           | KCNA4   |
| Wuweizi | WWZ21 | 10102   | BATMAN-TCM | Clovene           | KCNA5   |
| Wuweizi | WWZ21 | 10102   | BATMAN-TCM | Clovene           | KCNB1   |
| Wuweizi | WWZ21 | 10102   | BATMAN-TCM | Clovene           | KCNC1   |
| Wuweizi | WWZ21 | 10102   | BATMAN-TCM | Clovene           | KCNC3   |
| Wuweizi | WWZ21 | 10102   | BATMAN-TCM | Clovene           | KCND1   |
| Wuweizi | WWZ21 | 10102   | BATMAN-TCM | Clovene           | KCND2   |
| Wuweizi | WWZ21 | 10102   | BATMAN-TCM | Clovene           | KCND3   |
| Wuweizi | WWZ21 | 10102   | BATMAN-TCM | Clovene           | KCNK4   |
| Wuweizi | WWZ21 | 10102   | BATMAN-TCM | Clovene           | KCNQ1   |
| Wuweizi | WWZ21 | 10102   | BATMAN-TCM | Clovene           | PRKAB1  |
| Wuweizi | WWZ21 | 10102   | BATMAN-TCM | Clovene           | RNASE1  |
| Wuweizi | WWZ21 | 10102   | BATMAN-TCM | Clovene           | TPO     |
| Wuweizi | WWZ22 | 5497182 | BATMAN-TCM | Clupanodonic Acid | ACSL4   |
| Wuweizi | WWZ22 | 5497182 | BATMAN-TCM | Clupanodonic Acid | ALDH1A1 |

|         |       |         |            |                   |         |
|---------|-------|---------|------------|-------------------|---------|
| Wuweizi | WWZ22 | 5497182 | BATMAN-TCM | Clupanodonic Acid | ALDH1A2 |
| Wuweizi | WWZ22 | 5497182 | BATMAN-TCM | Clupanodonic Acid | ALDH3A1 |
| Wuweizi | WWZ22 | 5497182 | BATMAN-TCM | Clupanodonic Acid | APOA2   |
| Wuweizi | WWZ22 | 5497182 | BATMAN-TCM | Clupanodonic Acid | AR      |
| Wuweizi | WWZ22 | 5497182 | BATMAN-TCM | Clupanodonic Acid | CKB     |
| Wuweizi | WWZ22 | 5497182 | BATMAN-TCM | Clupanodonic Acid | CKM     |
| Wuweizi | WWZ22 | 5497182 | BATMAN-TCM | Clupanodonic Acid | CKMT1B  |
| Wuweizi | WWZ22 | 5497182 | BATMAN-TCM | Clupanodonic Acid | COL27A1 |
| Wuweizi | WWZ22 | 5497182 | BATMAN-TCM | Clupanodonic Acid | ELOVL4  |
| Wuweizi | WWZ22 | 5497182 | BATMAN-TCM | Clupanodonic Acid | F12     |
| Wuweizi | WWZ22 | 5497182 | BATMAN-TCM | Clupanodonic Acid | FADS1   |
| Wuweizi | WWZ22 | 5497182 | BATMAN-TCM | Clupanodonic Acid | FADS2   |
| Wuweizi | WWZ22 | 5497182 | BATMAN-TCM | Clupanodonic Acid | GAMT    |
| Wuweizi | WWZ22 | 5497182 | BATMAN-TCM | Clupanodonic Acid | GATM    |
| Wuweizi | WWZ22 | 5497182 | BATMAN-TCM | Clupanodonic Acid | GPRC5A  |

|         |       |         |            |                   |         |
|---------|-------|---------|------------|-------------------|---------|
| Wuweizi | WWZ22 | 5497182 | BATMAN-TCM | Clupanodonic Acid | HSD11B1 |
| Wuweizi | WWZ22 | 5497182 | BATMAN-TCM | Clupanodonic Acid | IL13    |
| Wuweizi | WWZ22 | 5497182 | BATMAN-TCM | Clupanodonic Acid | IL1B    |
| Wuweizi | WWZ22 | 5497182 | BATMAN-TCM | Clupanodonic Acid | LPCAT1  |
| Wuweizi | WWZ22 | 5497182 | BATMAN-TCM | Clupanodonic Acid | NR0B1   |
| Wuweizi | WWZ22 | 5497182 | BATMAN-TCM | Clupanodonic Acid | NR3C1   |
| Wuweizi | WWZ22 | 5497182 | BATMAN-TCM | Clupanodonic Acid | PPARD   |
| Wuweizi | WWZ22 | 5497182 | BATMAN-TCM | Clupanodonic Acid | PPARG   |
| Wuweizi | WWZ22 | 5497182 | BATMAN-TCM | Clupanodonic Acid | PTGER1  |
| Wuweizi | WWZ22 | 5497182 | BATMAN-TCM | Clupanodonic Acid | PTGER2  |
| Wuweizi | WWZ22 | 5497182 | BATMAN-TCM | Clupanodonic Acid | PTGER3  |
| Wuweizi | WWZ22 | 5497182 | BATMAN-TCM | Clupanodonic Acid | PTGER4  |
| Wuweizi | WWZ22 | 5497182 | BATMAN-TCM | Clupanodonic Acid | PTGS1   |
| Wuweizi | WWZ22 | 5497182 | BATMAN-TCM | Clupanodonic Acid | PTGS2   |
| Wuweizi | WWZ22 | 5497182 | BATMAN-TCM | Clupanodonic Acid | RARA    |

|         |       |         |            |                   |           |
|---------|-------|---------|------------|-------------------|-----------|
| Wuweizi | WWZ22 | 5497182 | BATMAN-TCM | Clupanodonic Acid | RARB      |
| Wuweizi | WWZ22 | 5497182 | BATMAN-TCM | Clupanodonic Acid | RARG      |
| Wuweizi | WWZ22 | 5497182 | BATMAN-TCM | Clupanodonic Acid | RARRES1   |
| Wuweizi | WWZ22 | 5497182 | BATMAN-TCM | Clupanodonic Acid | RXRA      |
| Wuweizi | WWZ22 | 5497182 | BATMAN-TCM | Clupanodonic Acid | RXRB      |
| Wuweizi | WWZ22 | 5497182 | BATMAN-TCM | Clupanodonic Acid | RXRG      |
| Wuweizi | WWZ22 | 5497182 | BATMAN-TCM | Clupanodonic Acid | SC5D      |
| Wuweizi | WWZ22 | 5497182 | BATMAN-TCM | Clupanodonic Acid | SERPIN B7 |
| Wuweizi | WWZ22 | 5497182 | BATMAN-TCM | Clupanodonic Acid | SLC6A8    |
| Wuweizi | WWZ22 | 5497182 | BATMAN-TCM | Clupanodonic Acid | SLC8A1    |
| Wuweizi | WWZ22 | 5497182 | BATMAN-TCM | Clupanodonic Acid | SLC9A1    |
| Wuweizi | WWZ22 | 5497182 | BATMAN-TCM | Clupanodonic Acid | TNF       |
| Wuweizi | WWZ22 | 5497182 | BATMAN-TCM | Clupanodonic Acid | TRPV1     |
| Wuweizi | WWZ23 | 86895   | BATMAN-TCM | Cuparene          | ALOX5     |
| Wuweizi | WWZ23 | 86895   | BATMAN-TCM | Cuparene          | F2        |

|         |       |           |            |                    |        |
|---------|-------|-----------|------------|--------------------|--------|
| Wuweizi | WWZ23 | 86895     | BATMAN-TCM | Cuparene           | GABRB2 |
| Wuweizi | WWZ23 | 86895     | BATMAN-TCM | Cuparene           | GABRB3 |
| Wuweizi | WWZ23 | 86895     | BATMAN-TCM | Cuparene           | S1PR5  |
| Wuweizi | WWZ24 | 81722     | BATMAN-TCM | Delta-Terpineol    | ESR1   |
| Wuweizi | WWZ24 | 81722     | BATMAN-TCM | Delta-Terpineol    | OPRK1  |
| Wuweizi | WWZ24 | 81722     | BATMAN-TCM | Delta-Terpineol    | PGR    |
| Wuweizi | WWZ24 | 81722     | BATMAN-TCM | Delta-Terpineol    | TRPA1  |
| Wuweizi | WWZ24 | 81722     | BATMAN-TCM | Delta-Terpineol    | TRPM8  |
| Wuweizi | WWZ24 | 81722     | BATMAN-TCM | Delta-Terpineol    | TRPV3  |
| Wuweizi | WWZ24 | 81722     | BATMAN-TCM | Delta-Terpineol    | WNT4   |
| Wuweizi | WWZ25 | MOL005317 | TCMSP      | Deoxyharringtonine | AR     |
| Wuweizi | WWZ25 | MOL005317 | TCMSP      | Deoxyharringtonine | NR3C2  |
| Wuweizi | WWZ25 | MOL005317 | TCMSP      | Deoxyharringtonine | RPL3   |
| Wuweizi | WWZ26 | 15250826  | BATMAN-TCM | Deoxyschizandrin   | PDE10A |
| Wuweizi | WWZ26 | 15250826  | BATMAN-TCM | Deoxyschizandrin   | PDE4B  |



|         |       |          |            |                  |         |
|---------|-------|----------|------------|------------------|---------|
| Wuweizi | WWZ26 | 15250826 | BATMAN-TCM | Deoxyschizandrin | PDE4D   |
| Wuweizi | WWZ27 | 98914    | BATMAN-TCM | Deoxyshikonin    | BGLAP   |
| Wuweizi | WWZ27 | 98914    | BATMAN-TCM | Deoxyshikonin    | DHODH   |
| Wuweizi | WWZ27 | 98914    | BATMAN-TCM | Deoxyshikonin    | F10     |
| Wuweizi | WWZ27 | 98914    | BATMAN-TCM | Deoxyshikonin    | F2      |
| Wuweizi | WWZ27 | 98914    | BATMAN-TCM | Deoxyshikonin    | F7      |
| Wuweizi | WWZ27 | 98914    | BATMAN-TCM | Deoxyshikonin    | F9      |
| Wuweizi | WWZ27 | 98914    | BATMAN-TCM | Deoxyshikonin    | GGCX    |
| Wuweizi | WWZ27 | 98914    | BATMAN-TCM | Deoxyshikonin    | HSD17B1 |
| Wuweizi | WWZ27 | 98914    | BATMAN-TCM | Deoxyshikonin    | NQO1    |
| Wuweizi | WWZ27 | 98914    | BATMAN-TCM | Deoxyshikonin    | NQO2    |
| Wuweizi | WWZ27 | 98914    | BATMAN-TCM | Deoxyshikonin    | PROC    |
| Wuweizi | WWZ27 | 98914    | BATMAN-TCM | Deoxyshikonin    | PROS1   |
| Wuweizi | WWZ27 | 98914    | BATMAN-TCM | Deoxyshikonin    | PROZ    |
| Wuweizi | WWZ27 | 98914    | BATMAN-TCM | Deoxyshikonin    | VKORC1  |

|         |       |        |            |            |         |
|---------|-------|--------|------------|------------|---------|
| Wuweizi | WWZ28 | 440917 | BATMAN-TCM | D-Limonene | ADH1A   |
| Wuweizi | WWZ28 | 440917 | BATMAN-TCM | D-Limonene | ADH1B   |
| Wuweizi | WWZ28 | 440917 | BATMAN-TCM | D-Limonene | ADH1C   |
| Wuweizi | WWZ28 | 440917 | BATMAN-TCM | D-Limonene | ALDH2   |
| Wuweizi | WWZ28 | 440917 | BATMAN-TCM | D-Limonene | CAT     |
| Wuweizi | WWZ28 | 440917 | BATMAN-TCM | D-Limonene | CYP17A1 |
| Wuweizi | WWZ28 | 440917 | BATMAN-TCM | D-Limonene | DLG4    |
| Wuweizi | WWZ28 | 440917 | BATMAN-TCM | D-Limonene | ESR1    |
| Wuweizi | WWZ28 | 440917 | BATMAN-TCM | D-Limonene | GAMT    |
| Wuweizi | WWZ28 | 440917 | BATMAN-TCM | D-Limonene | GATM    |
| Wuweizi | WWZ28 | 440917 | BATMAN-TCM | D-Limonene | IYD     |
| Wuweizi | WWZ28 | 440917 | BATMAN-TCM | D-Limonene | KCNA1   |
| Wuweizi | WWZ28 | 440917 | BATMAN-TCM | D-Limonene | KCNA2   |
| Wuweizi | WWZ28 | 440917 | BATMAN-TCM | D-Limonene | KCNA4   |
| Wuweizi | WWZ28 | 440917 | BATMAN-TCM | D-Limonene | KCNA5   |

|         |       |        |            |            |         |
|---------|-------|--------|------------|------------|---------|
| Wuweizi | WWZ28 | 440917 | BATMAN-TCM | D-Limonene | KCNB1   |
| Wuweizi | WWZ28 | 440917 | BATMAN-TCM | D-Limonene | KCNC1   |
| Wuweizi | WWZ28 | 440917 | BATMAN-TCM | D-Limonene | KCNC3   |
| Wuweizi | WWZ28 | 440917 | BATMAN-TCM | D-Limonene | KCND1   |
| Wuweizi | WWZ28 | 440917 | BATMAN-TCM | D-Limonene | KCND2   |
| Wuweizi | WWZ28 | 440917 | BATMAN-TCM | D-Limonene | KCND3   |
| Wuweizi | WWZ28 | 440917 | BATMAN-TCM | D-Limonene | KCNK4   |
| Wuweizi | WWZ28 | 440917 | BATMAN-TCM | D-Limonene | KCNQ1   |
| Wuweizi | WWZ28 | 440917 | BATMAN-TCM | D-Limonene | NR3C2   |
| Wuweizi | WWZ28 | 440917 | BATMAN-TCM | D-Limonene | OPRK1   |
| Wuweizi | WWZ28 | 440917 | BATMAN-TCM | D-Limonene | PGR     |
| Wuweizi | WWZ28 | 440917 | BATMAN-TCM | D-Limonene | PRKAB1  |
| Wuweizi | WWZ28 | 440917 | BATMAN-TCM | D-Limonene | RNASE1  |
| Wuweizi | WWZ28 | 440917 | BATMAN-TCM | D-Limonene | TPO     |
| Wuweizi | WWZ29 | 10248  | BATMAN-TCM | Elemicin   | CACNA1C |

|         |       |        |            |                                  |        |
|---------|-------|--------|------------|----------------------------------|--------|
| Wuweizi | WWZ29 | 10248  | BATMAN-TCM | Elemicin                         | DHFR   |
| Wuweizi | WWZ29 | 10248  | BATMAN-TCM | Elemicin                         | DMTN   |
| Wuweizi | WWZ29 | 10248  | BATMAN-TCM | Elemicin                         | KCNMA1 |
| Wuweizi | WWZ29 | 10248  | BATMAN-TCM | Elemicin                         | PDE10A |
| Wuweizi | WWZ29 | 10248  | BATMAN-TCM | Elemicin                         | PDE2A  |
| Wuweizi | WWZ29 | 10248  | BATMAN-TCM | Elemicin                         | PDE3A  |
| Wuweizi | WWZ29 | 10248  | BATMAN-TCM | Elemicin                         | PDE3B  |
| Wuweizi | WWZ29 | 10248  | BATMAN-TCM | Elemicin                         | PDE4A  |
| Wuweizi | WWZ29 | 10248  | BATMAN-TCM | Elemicin                         | SHMT1  |
| Wuweizi | WWZ29 | 10248  | BATMAN-TCM | Elemicin                         | TRDMT1 |
| Wuweizi | WWZ29 | 10248  | BATMAN-TCM | Elemicin                         | TYMS   |
| Wuweizi | WWZ3  | 327096 | BATMAN-TCM | 4-Phenylbicyclo[2.2.2]Octan-1-OI | ESR1   |
| Wuweizi | WWZ3  | 327096 | BATMAN-TCM | 4-Phenylbicyclo[2.2.2]Octan-1-OI | ESR2   |
| Wuweizi | WWZ3  | 327096 | BATMAN-TCM | 4-Phenylbicyclo[2.2.2]Octan-1-OI | NR112  |
| Wuweizi | WWZ3  | 327096 | BATMAN-TCM | 4-Phenylbicyclo[2.2.2]Octan-1-OI | S1PR5  |

|         |       |         |            |                 |             |
|---------|-------|---------|------------|-----------------|-------------|
| Wuweizi | WWZ30 | 5317082 | BATMAN-TCM | Epiguaipyridine | ACACA       |
| Wuweizi | WWZ30 | 5317082 | BATMAN-TCM | Epiguaipyridine | ACP1        |
| Wuweizi | WWZ30 | 5317082 | BATMAN-TCM | Epiguaipyridine | ACTN2       |
| Wuweizi | WWZ30 | 5317082 | BATMAN-TCM | Epiguaipyridine | ADK         |
| Wuweizi | WWZ30 | 5317082 | BATMAN-TCM | Epiguaipyridine | ADRA1<br>A  |
| Wuweizi | WWZ30 | 5317082 | BATMAN-TCM | Epiguaipyridine | ADRA1<br>B  |
| Wuweizi | WWZ30 | 5317082 | BATMAN-TCM | Epiguaipyridine | ADRA2<br>A  |
| Wuweizi | WWZ30 | 5317082 | BATMAN-TCM | Epiguaipyridine | ADRA2<br>B  |
| Wuweizi | WWZ30 | 5317082 | BATMAN-TCM | Epiguaipyridine | ADRA2<br>C  |
| Wuweizi | WWZ30 | 5317082 | BATMAN-TCM | Epiguaipyridine | ADRB1       |
| Wuweizi | WWZ30 | 5317082 | BATMAN-TCM | Epiguaipyridine | ADRB2       |
| Wuweizi | WWZ30 | 5317082 | BATMAN-TCM | Epiguaipyridine | ADRB3       |
| Wuweizi | WWZ30 | 5317082 | BATMAN-TCM | Epiguaipyridine | AGTR1       |
| Wuweizi | WWZ30 | 5317082 | BATMAN-TCM | Epiguaipyridine | ALDH3<br>A2 |
| Wuweizi | WWZ30 | 5317082 | BATMAN-TCM | Epiguaipyridine | AOC3        |

|         |       |         |            |                 |        |
|---------|-------|---------|------------|-----------------|--------|
| Wuweizi | WWZ30 | 5317082 | BATMAN-TCM | Epiguaipyridine | APRT   |
| Wuweizi | WWZ30 | 5317082 | BATMAN-TCM | Epiguaipyridine | ARRB2  |
| Wuweizi | WWZ30 | 5317082 | BATMAN-TCM | Epiguaipyridine | ARRDC3 |
| Wuweizi | WWZ30 | 5317082 | BATMAN-TCM | Epiguaipyridine | CALCA  |
| Wuweizi | WWZ30 | 5317082 | BATMAN-TCM | Epiguaipyridine | CHRNA7 |
| Wuweizi | WWZ30 | 5317082 | BATMAN-TCM | Epiguaipyridine | CYP2B6 |
| Wuweizi | WWZ30 | 5317082 | BATMAN-TCM | Epiguaipyridine | HPRT1  |
| Wuweizi | WWZ30 | 5317082 | BATMAN-TCM | Epiguaipyridine | HRH1   |
| Wuweizi | WWZ30 | 5317082 | BATMAN-TCM | Epiguaipyridine | HRH2   |
| Wuweizi | WWZ30 | 5317082 | BATMAN-TCM | Epiguaipyridine | HTR2A  |
| Wuweizi | WWZ30 | 5317082 | BATMAN-TCM | Epiguaipyridine | HTR2C  |
| Wuweizi | WWZ30 | 5317082 | BATMAN-TCM | Epiguaipyridine | HTR7   |
| Wuweizi | WWZ30 | 5317082 | BATMAN-TCM | Epiguaipyridine | INS    |
| Wuweizi | WWZ30 | 5317082 | BATMAN-TCM | Epiguaipyridine | KCNJ1  |
| Wuweizi | WWZ30 | 5317082 | BATMAN-TCM | Epiguaipyridine | KCNJ8  |

|         |       |         |            |                 |         |
|---------|-------|---------|------------|-----------------|---------|
| Wuweizi | WWZ30 | 5317082 | BATMAN-TCM | Epiguaipyridine | MTAP    |
| Wuweizi | WWZ30 | 5317082 | BATMAN-TCM | Epiguaipyridine | P4HA1   |
| Wuweizi | WWZ30 | 5317082 | BATMAN-TCM | Epiguaipyridine | PECR    |
| Wuweizi | WWZ30 | 5317082 | BATMAN-TCM | Epiguaipyridine | PHKG2   |
| Wuweizi | WWZ30 | 5317082 | BATMAN-TCM | Epiguaipyridine | PNP     |
| Wuweizi | WWZ30 | 5317082 | BATMAN-TCM | Epiguaipyridine | PRKAA1  |
| Wuweizi | WWZ30 | 5317082 | BATMAN-TCM | Epiguaipyridine | PRKAA2  |
| Wuweizi | WWZ30 | 5317082 | BATMAN-TCM | Epiguaipyridine | RAB7A   |
| Wuweizi | WWZ30 | 5317082 | BATMAN-TCM | Epiguaipyridine | SCN1A   |
| Wuweizi | WWZ30 | 5317082 | BATMAN-TCM | Epiguaipyridine | SCNN1A  |
| Wuweizi | WWZ30 | 5317082 | BATMAN-TCM | Epiguaipyridine | SCNN1B  |
| Wuweizi | WWZ30 | 5317082 | BATMAN-TCM | Epiguaipyridine | SCNN1G  |
| Wuweizi | WWZ30 | 5317082 | BATMAN-TCM | Epiguaipyridine | SCT     |
| Wuweizi | WWZ30 | 5317082 | BATMAN-TCM | Epiguaipyridine | SLC22A1 |
| Wuweizi | WWZ30 | 5317082 | BATMAN-TCM | Epiguaipyridine | SLC6A2  |

|         |       |          |            |                  |       |
|---------|-------|----------|------------|------------------|-------|
| Wuweizi | WWZ30 | 5317082  | BATMAN-TCM | Epiguaipyridine  | SRPK2 |
| Wuweizi | WWZ30 | 5317082  | BATMAN-TCM | Epiguaipyridine  | TLR7  |
| Wuweizi | WWZ30 | 5317082  | BATMAN-TCM | Epiguaipyridine  | TLR8  |
| Wuweizi | WWZ30 | 5317082  | BATMAN-TCM | Epiguaipyridine  | UGCG  |
| Wuweizi | WWZ31 | 12302130 | BATMAN-TCM | Epsilon-Cadinene | ADH1A |
| Wuweizi | WWZ31 | 12302130 | BATMAN-TCM | Epsilon-Cadinene | ADH1B |
| Wuweizi | WWZ31 | 12302130 | BATMAN-TCM | Epsilon-Cadinene | ADH1C |
| Wuweizi | WWZ31 | 12302130 | BATMAN-TCM | Epsilon-Cadinene | ALDH2 |
| Wuweizi | WWZ31 | 12302130 | BATMAN-TCM | Epsilon-Cadinene | CAT   |
| Wuweizi | WWZ31 | 12302130 | BATMAN-TCM | Epsilon-Cadinene | DLG4  |
| Wuweizi | WWZ31 | 12302130 | BATMAN-TCM | Epsilon-Cadinene | GAMT  |
| Wuweizi | WWZ31 | 12302130 | BATMAN-TCM | Epsilon-Cadinene | GATM  |
| Wuweizi | WWZ31 | 12302130 | BATMAN-TCM | Epsilon-Cadinene | IYD   |
| Wuweizi | WWZ31 | 12302130 | BATMAN-TCM | Epsilon-Cadinene | KCNA1 |
| Wuweizi | WWZ31 | 12302130 | BATMAN-TCM | Epsilon-Cadinene | KCNA2 |



|         |       |          |            |                  |        |
|---------|-------|----------|------------|------------------|--------|
| Wuweizi | WWZ31 | 12302130 | BATMAN-TCM | Epsilon-Cadinene | KCNA4  |
| Wuweizi | WWZ31 | 12302130 | BATMAN-TCM | Epsilon-Cadinene | KCNA5  |
| Wuweizi | WWZ31 | 12302130 | BATMAN-TCM | Epsilon-Cadinene | KCNB1  |
| Wuweizi | WWZ31 | 12302130 | BATMAN-TCM | Epsilon-Cadinene | KCNC1  |
| Wuweizi | WWZ31 | 12302130 | BATMAN-TCM | Epsilon-Cadinene | KCNC3  |
| Wuweizi | WWZ31 | 12302130 | BATMAN-TCM | Epsilon-Cadinene | KCND1  |
| Wuweizi | WWZ31 | 12302130 | BATMAN-TCM | Epsilon-Cadinene | KCND2  |
| Wuweizi | WWZ31 | 12302130 | BATMAN-TCM | Epsilon-Cadinene | KCND3  |
| Wuweizi | WWZ31 | 12302130 | BATMAN-TCM | Epsilon-Cadinene | KCNK4  |
| Wuweizi | WWZ31 | 12302130 | BATMAN-TCM | Epsilon-Cadinene | KCNQ1  |
| Wuweizi | WWZ31 | 12302130 | BATMAN-TCM | Epsilon-Cadinene | PRKAB1 |
| Wuweizi | WWZ31 | 12302130 | BATMAN-TCM | Epsilon-Cadinene | RNASE1 |
| Wuweizi | WWZ31 | 12302130 | BATMAN-TCM | Epsilon-Cadinene | TPO    |
| Wuweizi | WWZ32 | 86852    | BATMAN-TCM | Gama-Octalactone | AR     |
| Wuweizi | WWZ33 | 521334   | BATMAN-TCM | Gamma-Selinene   | ADH1A  |

|         |       |        |            |                |       |
|---------|-------|--------|------------|----------------|-------|
| Wuweizi | WWZ33 | 521334 | BATMAN-TCM | Gamma-Selinene | ADH1B |
| Wuweizi | WWZ33 | 521334 | BATMAN-TCM | Gamma-Selinene | ADH1C |
| Wuweizi | WWZ33 | 521334 | BATMAN-TCM | Gamma-Selinene | ALDH2 |
| Wuweizi | WWZ33 | 521334 | BATMAN-TCM | Gamma-Selinene | CAT   |
| Wuweizi | WWZ33 | 521334 | BATMAN-TCM | Gamma-Selinene | DLG4  |
| Wuweizi | WWZ33 | 521334 | BATMAN-TCM | Gamma-Selinene | GAMT  |
| Wuweizi | WWZ33 | 521334 | BATMAN-TCM | Gamma-Selinene | GATM  |
| Wuweizi | WWZ33 | 521334 | BATMAN-TCM | Gamma-Selinene | IYD   |
| Wuweizi | WWZ33 | 521334 | BATMAN-TCM | Gamma-Selinene | KCNA1 |
| Wuweizi | WWZ33 | 521334 | BATMAN-TCM | Gamma-Selinene | KCNA2 |
| Wuweizi | WWZ33 | 521334 | BATMAN-TCM | Gamma-Selinene | KCNA4 |
| Wuweizi | WWZ33 | 521334 | BATMAN-TCM | Gamma-Selinene | KCNA5 |
| Wuweizi | WWZ33 | 521334 | BATMAN-TCM | Gamma-Selinene | KCNB1 |
| Wuweizi | WWZ33 | 521334 | BATMAN-TCM | Gamma-Selinene | KCNC1 |
| Wuweizi | WWZ33 | 521334 | BATMAN-TCM | Gamma-Selinene | KCNC3 |

|         |       |        |            |                |          |
|---------|-------|--------|------------|----------------|----------|
| Wuweizi | WWZ33 | 521334 | BATMAN-TCM | Gamma-Selinene | KCND1    |
| Wuweizi | WWZ33 | 521334 | BATMAN-TCM | Gamma-Selinene | KCND2    |
| Wuweizi | WWZ33 | 521334 | BATMAN-TCM | Gamma-Selinene | KCND3    |
| Wuweizi | WWZ33 | 521334 | BATMAN-TCM | Gamma-Selinene | KCNK4    |
| Wuweizi | WWZ33 | 521334 | BATMAN-TCM | Gamma-Selinene | KCNQ1    |
| Wuweizi | WWZ33 | 521334 | BATMAN-TCM | Gamma-Selinene | PRKAB1   |
| Wuweizi | WWZ33 | 521334 | BATMAN-TCM | Gamma-Selinene | RNASE1   |
| Wuweizi | WWZ33 | 521334 | BATMAN-TCM | Gamma-Selinene | TPO      |
| Wuweizi | WWZ34 | 637566 | BATMAN-TCM | Geraniol       | ALDH1 A1 |
| Wuweizi | WWZ34 | 637566 | BATMAN-TCM | Geraniol       | ALDH1 A2 |
| Wuweizi | WWZ34 | 637566 | BATMAN-TCM | Geraniol       | ALDH1 A3 |
| Wuweizi | WWZ34 | 637566 | BATMAN-TCM | Geraniol       | ALDH3 A1 |
| Wuweizi | WWZ34 | 637566 | BATMAN-TCM | Geraniol       | DHRS3    |
| Wuweizi | WWZ34 | 637566 | BATMAN-TCM | Geraniol       | LRAT     |
| Wuweizi | WWZ34 | 637566 | BATMAN-TCM | Geraniol       | RBP1     |

|         |       |           |            |                                     |       |
|---------|-------|-----------|------------|-------------------------------------|-------|
| Wuweizi | WWZ34 | 637566    | BATMAN-TCM | Geraniol                            | RBP3  |
| Wuweizi | WWZ34 | 637566    | BATMAN-TCM | Geraniol                            | RDH12 |
| Wuweizi | WWZ34 | 637566    | BATMAN-TCM | Geraniol                            | RDH5  |
| Wuweizi | WWZ34 | 637566    | BATMAN-TCM | Geraniol                            | RHO   |
| Wuweizi | WWZ34 | 637566    | BATMAN-TCM | Geraniol                            | RLBP1 |
| Wuweizi | WWZ34 | 637566    | BATMAN-TCM | Geraniol                            | RS1   |
| Wuweizi | WWZ35 | MOL008978 | TCMSP      | Gomisin R                           | AR    |
| Wuweizi | WWZ35 | MOL008978 | TCMSP      | Gomisin R                           | ESR1  |
| Wuweizi | WWZ35 | MOL008978 | TCMSP      | Gomisin R                           | NCOA2 |
| Wuweizi | WWZ35 | MOL008978 | TCMSP      | Gomisin R                           | PRSS1 |
| Wuweizi | WWZ35 | MOL008978 | TCMSP      | Gomisin R                           | PTGS2 |
| Wuweizi | WWZ36 | 5319725   | BATMAN-TCM | 1-Methyl-4-Methylethenylcyclohexene | ADH1A |
| Wuweizi | WWZ36 | 5319725   | BATMAN-TCM | 1-Methyl-4-Methylethenylcyclohexene | ADH1B |
| Wuweizi | WWZ36 | 5319725   | BATMAN-TCM | 1-Methyl-4-Methylethenylcyclohexene | ADH1C |
| Wuweizi | WWZ36 | 5319725   | BATMAN-TCM | 1-Methyl-4-Methylethenylcyclohexene | ALDH2 |

|         |       |         |            |                                     |         |
|---------|-------|---------|------------|-------------------------------------|---------|
| Wuweizi | WWZ36 | 5319725 | BATMAN-TCM | 1-Methyl-4-Methylethenylcyclohexene | CAT     |
| Wuweizi | WWZ36 | 5319725 | BATMAN-TCM | 1-Methyl-4-Methylethenylcyclohexene | CYP17A1 |
| Wuweizi | WWZ36 | 5319725 | BATMAN-TCM | 1-Methyl-4-Methylethenylcyclohexene | DLG4    |
| Wuweizi | WWZ36 | 5319725 | BATMAN-TCM | 1-Methyl-4-Methylethenylcyclohexene | ESR1    |
| Wuweizi | WWZ36 | 5319725 | BATMAN-TCM | 1-Methyl-4-Methylethenylcyclohexene | GAMT    |
| Wuweizi | WWZ36 | 5319725 | BATMAN-TCM | 1-Methyl-4-Methylethenylcyclohexene | GATM    |
| Wuweizi | WWZ36 | 5319725 | BATMAN-TCM | 1-Methyl-4-Methylethenylcyclohexene | IYD     |
| Wuweizi | WWZ36 | 5319725 | BATMAN-TCM | 1-Methyl-4-Methylethenylcyclohexene | KCNA1   |
| Wuweizi | WWZ36 | 5319725 | BATMAN-TCM | 1-Methyl-4-Methylethenylcyclohexene | KCNA2   |
| Wuweizi | WWZ36 | 5319725 | BATMAN-TCM | 1-Methyl-4-Methylethenylcyclohexene | KCNA4   |
| Wuweizi | WWZ36 | 5319725 | BATMAN-TCM | 1-Methyl-4-Methylethenylcyclohexene | KCNA5   |
| Wuweizi | WWZ36 | 5319725 | BATMAN-TCM | 1-Methyl-4-Methylethenylcyclohexene | KCNB1   |
| Wuweizi | WWZ36 | 5319725 | BATMAN-TCM | 1-Methyl-4-Methylethenylcyclohexene | KCNC1   |
| Wuweizi | WWZ36 | 5319725 | BATMAN-TCM | 1-Methyl-4-Methylethenylcyclohexene | KCNC3   |
| Wuweizi | WWZ36 | 5319725 | BATMAN-TCM | 1-Methyl-4-Methylethenylcyclohexene | KCND1   |

|         |       |           |            |                                     |        |
|---------|-------|-----------|------------|-------------------------------------|--------|
| Wuweizi | WWZ36 | 5319725   | BATMAN-TCM | 1-Methyl-4-Methylethenylcyclohexene | KCND2  |
| Wuweizi | WWZ36 | 5319725   | BATMAN-TCM | 1-Methyl-4-Methylethenylcyclohexene | KCND3  |
| Wuweizi | WWZ36 | 5319725   | BATMAN-TCM | 1-Methyl-4-Methylethenylcyclohexene | KCNK4  |
| Wuweizi | WWZ36 | 5319725   | BATMAN-TCM | 1-Methyl-4-Methylethenylcyclohexene | KCNQ1  |
| Wuweizi | WWZ36 | 5319725   | BATMAN-TCM | 1-Methyl-4-Methylethenylcyclohexene | NR3C2  |
| Wuweizi | WWZ36 | 5319725   | BATMAN-TCM | 1-Methyl-4-Methylethenylcyclohexene | OPRK1  |
| Wuweizi | WWZ36 | 5319725   | BATMAN-TCM | 1-Methyl-4-Methylethenylcyclohexene | PGR    |
| Wuweizi | WWZ36 | 5319725   | BATMAN-TCM | 1-Methyl-4-Methylethenylcyclohexene | PRKAB1 |
| Wuweizi | WWZ36 | 5319725   | BATMAN-TCM | 1-Methyl-4-Methylethenylcyclohexene | RNASE1 |
| Wuweizi | WWZ36 | 5319725   | BATMAN-TCM | 1-Methyl-4-Methylethenylcyclohexene | TPO    |
| Wuweizi | WWZ37 | 5317805   | BATMAN-TCM | Gomisin T                           | TYRP1  |
| Wuweizi | WWZ37 | 5317805   | BATMAN-TCM | Gomisin T                           | TYR    |
| Wuweizi | WWZ37 | 5317805   | BATMAN-TCM | Gomisin T                           | DCT    |
| Wuweizi | WWZ38 | MOL008968 | TCMSP      | Gomisin-A                           | ACHE   |
| Wuweizi | WWZ39 | 5318039   | BATMAN-TCM | Hexahydrocurcumin                   | ADRA2A |

|         |       |         |            |                   |       |
|---------|-------|---------|------------|-------------------|-------|
| Wuweizi | WWZ39 | 5318039 | BATMAN-TCM | Hexahydrocurcumin | ALOX5 |
| Wuweizi | WWZ39 | 5318039 | BATMAN-TCM | Hexahydrocurcumin | DDC   |
| Wuweizi | WWZ39 | 5318039 | BATMAN-TCM | Hexahydrocurcumin | DRD1  |
| Wuweizi | WWZ39 | 5318039 | BATMAN-TCM | Hexahydrocurcumin | DRD2  |
| Wuweizi | WWZ39 | 5318039 | BATMAN-TCM | Hexahydrocurcumin | DRD3  |
| Wuweizi | WWZ39 | 5318039 | BATMAN-TCM | Hexahydrocurcumin | DRD4  |
| Wuweizi | WWZ39 | 5318039 | BATMAN-TCM | Hexahydrocurcumin | DRD5  |
| Wuweizi | WWZ39 | 5318039 | BATMAN-TCM | Hexahydrocurcumin | ESR1  |
| Wuweizi | WWZ39 | 5318039 | BATMAN-TCM | Hexahydrocurcumin | ESR2  |
| Wuweizi | WWZ39 | 5318039 | BATMAN-TCM | Hexahydrocurcumin | NR112 |
| Wuweizi | WWZ39 | 5318039 | BATMAN-TCM | Hexahydrocurcumin | PTGS1 |
| Wuweizi | WWZ39 | 5318039 | BATMAN-TCM | Hexahydrocurcumin | PTGS2 |
| Wuweizi | WWZ4  | 5316200 | BATMAN-TCM | Alpha-Cuparenol   | ESR1  |
| Wuweizi | WWZ4  | 5316200 | BATMAN-TCM | Alpha-Cuparenol   | ESR2  |
| Wuweizi | WWZ4  | 5316200 | BATMAN-TCM | Alpha-Cuparenol   | NR112 |

|         |       |          |            |                      |          |
|---------|-------|----------|------------|----------------------|----------|
| Wuweizi | WWZ4  | 5316200  | BATMAN-TCM | Alpha-Cuparenol      | S1PR5    |
| Wuweizi | WWZ40 | 5318040  | BATMAN-TCM | Hexahydroxytaxadiene | ESR1     |
| Wuweizi | WWZ40 | 5318040  | BATMAN-TCM | Hexahydroxytaxadiene | PGR      |
| Wuweizi | WWZ40 | 5318040  | BATMAN-TCM | Hexahydroxytaxadiene | PTGER1   |
| Wuweizi | WWZ40 | 5318040  | BATMAN-TCM | Hexahydroxytaxadiene | PTGIR    |
| Wuweizi | WWZ40 | 5318040  | BATMAN-TCM | Hexahydroxytaxadiene | VDR      |
| Wuweizi | WWZ41 | 11127402 | BATMAN-TCM | Isolongifolene       | ADH1A    |
| Wuweizi | WWZ41 | 11127402 | BATMAN-TCM | Isolongifolene       | ADH1B    |
| Wuweizi | WWZ41 | 11127402 | BATMAN-TCM | Isolongifolene       | ADH1C    |
| Wuweizi | WWZ41 | 11127402 | BATMAN-TCM | Isolongifolene       | ALDH1 A1 |
| Wuweizi | WWZ41 | 11127402 | BATMAN-TCM | Isolongifolene       | ALDH1 A2 |
| Wuweizi | WWZ41 | 11127402 | BATMAN-TCM | Isolongifolene       | ALDH1 A3 |
| Wuweizi | WWZ41 | 11127402 | BATMAN-TCM | Isolongifolene       | ALDH2    |
| Wuweizi | WWZ41 | 11127402 | BATMAN-TCM | Isolongifolene       | CAT      |
| Wuweizi | WWZ41 | 11127402 | BATMAN-TCM | Isolongifolene       | CYP17A 1 |



|         |       |          |            |                |       |
|---------|-------|----------|------------|----------------|-------|
| Wuweizi | WWZ41 | 11127402 | BATMAN-TCM | Isolongifolene | DHRS3 |
| Wuweizi | WWZ41 | 11127402 | BATMAN-TCM | Isolongifolene | DLG4  |
| Wuweizi | WWZ41 | 11127402 | BATMAN-TCM | Isolongifolene | ESR1  |
| Wuweizi | WWZ41 | 11127402 | BATMAN-TCM | Isolongifolene | GAMT  |
| Wuweizi | WWZ41 | 11127402 | BATMAN-TCM | Isolongifolene | GATM  |
| Wuweizi | WWZ41 | 11127402 | BATMAN-TCM | Isolongifolene | IYD   |
| Wuweizi | WWZ41 | 11127402 | BATMAN-TCM | Isolongifolene | KCNA1 |
| Wuweizi | WWZ41 | 11127402 | BATMAN-TCM | Isolongifolene | KCNA2 |
| Wuweizi | WWZ41 | 11127402 | BATMAN-TCM | Isolongifolene | KCNA4 |
| Wuweizi | WWZ41 | 11127402 | BATMAN-TCM | Isolongifolene | KCNA5 |
| Wuweizi | WWZ41 | 11127402 | BATMAN-TCM | Isolongifolene | KCNB1 |
| Wuweizi | WWZ41 | 11127402 | BATMAN-TCM | Isolongifolene | KCNC1 |
| Wuweizi | WWZ41 | 11127402 | BATMAN-TCM | Isolongifolene | KCNC3 |
| Wuweizi | WWZ41 | 11127402 | BATMAN-TCM | Isolongifolene | KCND1 |
| Wuweizi | WWZ41 | 11127402 | BATMAN-TCM | Isolongifolene | KCND2 |

|         |       |          |            |                |        |
|---------|-------|----------|------------|----------------|--------|
| Wuweizi | WWZ41 | 11127402 | BATMAN-TCM | Isolongifolene | KCND3  |
| Wuweizi | WWZ41 | 11127402 | BATMAN-TCM | Isolongifolene | KCNK4  |
| Wuweizi | WWZ41 | 11127402 | BATMAN-TCM | Isolongifolene | KCNQ1  |
| Wuweizi | WWZ41 | 11127402 | BATMAN-TCM | Isolongifolene | LRAT   |
| Wuweizi | WWZ41 | 11127402 | BATMAN-TCM | Isolongifolene | NR3C2  |
| Wuweizi | WWZ41 | 11127402 | BATMAN-TCM | Isolongifolene | OPRK1  |
| Wuweizi | WWZ41 | 11127402 | BATMAN-TCM | Isolongifolene | PGR    |
| Wuweizi | WWZ41 | 11127402 | BATMAN-TCM | Isolongifolene | PRKAB1 |
| Wuweizi | WWZ41 | 11127402 | BATMAN-TCM | Isolongifolene | RBP1   |
| Wuweizi | WWZ41 | 11127402 | BATMAN-TCM | Isolongifolene | RBP3   |
| Wuweizi | WWZ41 | 11127402 | BATMAN-TCM | Isolongifolene | RDH12  |
| Wuweizi | WWZ41 | 11127402 | BATMAN-TCM | Isolongifolene | RDH5   |
| Wuweizi | WWZ41 | 11127402 | BATMAN-TCM | Isolongifolene | RLBP1  |
| Wuweizi | WWZ41 | 11127402 | BATMAN-TCM | Isolongifolene | RNASE1 |
| Wuweizi | WWZ41 | 11127402 | BATMAN-TCM | Isolongifolene | TPO    |

|         |       |           |        |            |                         |         |
|---------|-------|-----------|--------|------------|-------------------------|---------|
| Wuweizi | WWZ42 |           | 440185 | BATMAN-TCM | Isolychnose             | CXCR4   |
| Wuweizi | WWZ42 |           | 440185 | BATMAN-TCM | Isolychnose             | IFNG    |
| Wuweizi | WWZ42 |           | 440185 | BATMAN-TCM | Isolychnose             | MMP9    |
| Wuweizi | WWZ42 |           | 440185 | BATMAN-TCM | Isolychnose             | NFKB2   |
| Wuweizi | WWZ42 |           | 440185 | BATMAN-TCM | Isolychnose             | TNF     |
| Wuweizi | WWZ43 | MOL009213 |        | TCMSP      | kadsulignan B           | AR      |
| Wuweizi | WWZ43 | MOL009213 |        | TCMSP      | kadsulignan B           | ESR1    |
| Wuweizi | WWZ44 |           | 6549   | BATMAN-TCM | Linalool                | ESR1    |
| Wuweizi | WWZ44 |           | 6549   | BATMAN-TCM | Linalool                | PGR     |
| Wuweizi | WWZ44 |           | 6549   | BATMAN-TCM | Linalool                | WNT4    |
| Wuweizi | WWZ45 |           | 7166   | BATMAN-TCM | 1-Phenyl-1,3-Butanedion | CACNA1G |
| Wuweizi | WWZ45 |           | 7166   | BATMAN-TCM | 1-Phenyl-1,3-Butanedion | CACNA1H |
| Wuweizi | WWZ45 |           | 7166   | BATMAN-TCM | 1-Phenyl-1,3-Butanedion | CYP11B1 |
| Wuweizi | WWZ45 |           | 7166   | BATMAN-TCM | 1-Phenyl-1,3-Butanedion | CYP11B2 |
| Wuweizi | WWZ45 |           | 7166   | BATMAN-TCM | 1-Phenyl-1,3-Butanedion | LCT     |

|         |       |        |            |                         |           |
|---------|-------|--------|------------|-------------------------|-----------|
| Wuweizi | WWZ45 | 7166   | BATMAN-TCM | 1-Phenyl-1,3-Butanedion | PTGIS     |
| Wuweizi | WWZ45 | 7166   | BATMAN-TCM | 1-Phenyl-1,3-Butanedion | PTGS1     |
| Wuweizi | WWZ45 | 7166   | BATMAN-TCM | 1-Phenyl-1,3-Butanedion | PTGS2     |
| Wuweizi | WWZ45 | 7166   | BATMAN-TCM | 1-Phenyl-1,3-Butanedion | SERPIN B7 |
| Wuweizi | WWZ45 | 7166   | BATMAN-TCM | 1-Phenyl-1,3-Butanedion | VKORC 1   |
| Wuweizi | WWZ46 | 289151 | BATMAN-TCM | Longifolene             | ADH1A     |
| Wuweizi | WWZ46 | 289151 | BATMAN-TCM | Longifolene             | ADH1B     |
| Wuweizi | WWZ46 | 289151 | BATMAN-TCM | Longifolene             | ADH1C     |
| Wuweizi | WWZ46 | 289151 | BATMAN-TCM | Longifolene             | ALDH2     |
| Wuweizi | WWZ46 | 289151 | BATMAN-TCM | Longifolene             | CAT       |
| Wuweizi | WWZ46 | 289151 | BATMAN-TCM | Longifolene             | DLG4      |
| Wuweizi | WWZ46 | 289151 | BATMAN-TCM | Longifolene             | GAMT      |
| Wuweizi | WWZ46 | 289151 | BATMAN-TCM | Longifolene             | GATM      |
| Wuweizi | WWZ46 | 289151 | BATMAN-TCM | Longifolene             | IYD       |
| Wuweizi | WWZ46 | 289151 | BATMAN-TCM | Longifolene             | KCNA1     |

|         |       |           |            |               |        |
|---------|-------|-----------|------------|---------------|--------|
| Wuweizi | WWZ46 | 289151    | BATMAN-TCM | Longifolene   | KCNA2  |
| Wuweizi | WWZ46 | 289151    | BATMAN-TCM | Longifolene   | KCNA4  |
| Wuweizi | WWZ46 | 289151    | BATMAN-TCM | Longifolene   | KCNA5  |
| Wuweizi | WWZ46 | 289151    | BATMAN-TCM | Longifolene   | KCNB1  |
| Wuweizi | WWZ46 | 289151    | BATMAN-TCM | Longifolene   | KCNC1  |
| Wuweizi | WWZ46 | 289151    | BATMAN-TCM | Longifolene   | KCNC3  |
| Wuweizi | WWZ46 | 289151    | BATMAN-TCM | Longifolene   | KCND1  |
| Wuweizi | WWZ46 | 289151    | BATMAN-TCM | Longifolene   | KCND2  |
| Wuweizi | WWZ46 | 289151    | BATMAN-TCM | Longifolene   | KCND3  |
| Wuweizi | WWZ46 | 289151    | BATMAN-TCM | Longifolene   | KCNK4  |
| Wuweizi | WWZ46 | 289151    | BATMAN-TCM | Longifolene   | KCNQ1  |
| Wuweizi | WWZ46 | 289151    | BATMAN-TCM | Longifolene   | PRKAB1 |
| Wuweizi | WWZ46 | 289151    | BATMAN-TCM | Longifolene   | RNASE1 |
| Wuweizi | WWZ46 | 289151    | BATMAN-TCM | Longifolene   | TPO    |
| Wuweizi | WWZ47 | MOL004624 | TCMSP      | Longikaurin A | CHRM1  |

|         |       |           |            |                 |       |
|---------|-------|-----------|------------|-----------------|-------|
| Wuweizi | WWZ47 | MOL004624 | TCMSP      | Longikaurin A   | CHRM2 |
| Wuweizi | WWZ47 | MOL004624 | TCMSP      | Longikaurin A   | PRSS1 |
| Wuweizi | WWZ48 | 12305725  | BATMAN-TCM | Longispinogenin | ANXA1 |
| Wuweizi | WWZ48 | 12305725  | BATMAN-TCM | Longispinogenin | AR    |
| Wuweizi | WWZ48 | 12305725  | BATMAN-TCM | Longispinogenin | ESR1  |
| Wuweizi | WWZ48 | 12305725  | BATMAN-TCM | Longispinogenin | NR3C1 |
| Wuweizi | WWZ48 | 12305725  | BATMAN-TCM | Longispinogenin | PGR   |
| Wuweizi | WWZ49 | 31253     | BATMAN-TCM | Myrcene         | ADH1A |
| Wuweizi | WWZ49 | 31253     | BATMAN-TCM | Myrcene         | ADH1B |
| Wuweizi | WWZ49 | 31253     | BATMAN-TCM | Myrcene         | ADH1C |
| Wuweizi | WWZ49 | 31253     | BATMAN-TCM | Myrcene         | ALDH2 |
| Wuweizi | WWZ49 | 31253     | BATMAN-TCM | Myrcene         | CAT   |
| Wuweizi | WWZ49 | 31253     | BATMAN-TCM | Myrcene         | DLG4  |
| Wuweizi | WWZ49 | 31253     | BATMAN-TCM | Myrcene         | GAMT  |
| Wuweizi | WWZ49 | 31253     | BATMAN-TCM | Myrcene         | GATM  |

|         |       |       |            |         |        |
|---------|-------|-------|------------|---------|--------|
| Wuweizi | WWZ49 | 31253 | BATMAN-TCM | Myrcene | IYD    |
| Wuweizi | WWZ49 | 31253 | BATMAN-TCM | Myrcene | KCNA1  |
| Wuweizi | WWZ49 | 31253 | BATMAN-TCM | Myrcene | KCNA2  |
| Wuweizi | WWZ49 | 31253 | BATMAN-TCM | Myrcene | KCNA4  |
| Wuweizi | WWZ49 | 31253 | BATMAN-TCM | Myrcene | KCNA5  |
| Wuweizi | WWZ49 | 31253 | BATMAN-TCM | Myrcene | KCNB1  |
| Wuweizi | WWZ49 | 31253 | BATMAN-TCM | Myrcene | KCNC1  |
| Wuweizi | WWZ49 | 31253 | BATMAN-TCM | Myrcene | KCNC3  |
| Wuweizi | WWZ49 | 31253 | BATMAN-TCM | Myrcene | KCND1  |
| Wuweizi | WWZ49 | 31253 | BATMAN-TCM | Myrcene | KCND2  |
| Wuweizi | WWZ49 | 31253 | BATMAN-TCM | Myrcene | KCND3  |
| Wuweizi | WWZ49 | 31253 | BATMAN-TCM | Myrcene | KCNK4  |
| Wuweizi | WWZ49 | 31253 | BATMAN-TCM | Myrcene | KCNQ1  |
| Wuweizi | WWZ49 | 31253 | BATMAN-TCM | Myrcene | PRKAB1 |
| Wuweizi | WWZ49 | 31253 | BATMAN-TCM | Myrcene | RNASE1 |

|         |       |       |            |                |         |
|---------|-------|-------|------------|----------------|---------|
| Wuweizi | WWZ49 | 31253 | BATMAN-TCM | Myrcene        | TPO     |
| Wuweizi | WWZ5  | 22311 | BATMAN-TCM | Alpha-Limonene | ADH1A   |
| Wuweizi | WWZ5  | 22311 | BATMAN-TCM | Alpha-Limonene | ADH1B   |
| Wuweizi | WWZ5  | 22311 | BATMAN-TCM | Alpha-Limonene | ADH1C   |
| Wuweizi | WWZ5  | 22311 | BATMAN-TCM | Alpha-Limonene | ALDH2   |
| Wuweizi | WWZ5  | 22311 | BATMAN-TCM | Alpha-Limonene | CAT     |
| Wuweizi | WWZ5  | 22311 | BATMAN-TCM | Alpha-Limonene | CYP17A1 |
| Wuweizi | WWZ5  | 22311 | BATMAN-TCM | Alpha-Limonene | DLG4    |
| Wuweizi | WWZ5  | 22311 | BATMAN-TCM | Alpha-Limonene | ESR1    |
| Wuweizi | WWZ5  | 22311 | BATMAN-TCM | Alpha-Limonene | GAMT    |
| Wuweizi | WWZ5  | 22311 | BATMAN-TCM | Alpha-Limonene | GATM    |
| Wuweizi | WWZ5  | 22311 | BATMAN-TCM | Alpha-Limonene | IYD     |
| Wuweizi | WWZ5  | 22311 | BATMAN-TCM | Alpha-Limonene | KCNA1   |
| Wuweizi | WWZ5  | 22311 | BATMAN-TCM | Alpha-Limonene | KCNA2   |
| Wuweizi | WWZ5  | 22311 | BATMAN-TCM | Alpha-Limonene | KCNA4   |



|         |      |       |            |                |        |
|---------|------|-------|------------|----------------|--------|
| Wuweizi | WWZ5 | 22311 | BATMAN-TCM | Alpha-Limonene | KCNA5  |
| Wuweizi | WWZ5 | 22311 | BATMAN-TCM | Alpha-Limonene | KCNB1  |
| Wuweizi | WWZ5 | 22311 | BATMAN-TCM | Alpha-Limonene | KCNC1  |
| Wuweizi | WWZ5 | 22311 | BATMAN-TCM | Alpha-Limonene | KCNC3  |
| Wuweizi | WWZ5 | 22311 | BATMAN-TCM | Alpha-Limonene | KCND1  |
| Wuweizi | WWZ5 | 22311 | BATMAN-TCM | Alpha-Limonene | KCND2  |
| Wuweizi | WWZ5 | 22311 | BATMAN-TCM | Alpha-Limonene | KCND3  |
| Wuweizi | WWZ5 | 22311 | BATMAN-TCM | Alpha-Limonene | KCNK4  |
| Wuweizi | WWZ5 | 22311 | BATMAN-TCM | Alpha-Limonene | KCNQ1  |
| Wuweizi | WWZ5 | 22311 | BATMAN-TCM | Alpha-Limonene | NR3C2  |
| Wuweizi | WWZ5 | 22311 | BATMAN-TCM | Alpha-Limonene | OPRK1  |
| Wuweizi | WWZ5 | 22311 | BATMAN-TCM | Alpha-Limonene | PGR    |
| Wuweizi | WWZ5 | 22311 | BATMAN-TCM | Alpha-Limonene | PRKAB1 |
| Wuweizi | WWZ5 | 22311 | BATMAN-TCM | Alpha-Limonene | RNASE1 |
| Wuweizi | WWZ5 | 22311 | BATMAN-TCM | Alpha-Limonene | TPO    |

|         |       |           |            |                      |       |
|---------|-------|-----------|------------|----------------------|-------|
| Wuweizi | WWZ50 | 3084282   | BATMAN-TCM | Myricadiol           | ANXA1 |
| Wuweizi | WWZ50 | 3084282   | BATMAN-TCM | Myricadiol           | AR    |
| Wuweizi | WWZ50 | 3084282   | BATMAN-TCM | Myricadiol           | ESR1  |
| Wuweizi | WWZ50 | 3084282   | BATMAN-TCM | Myricadiol           | NR3C1 |
| Wuweizi | WWZ50 | 3084282   | BATMAN-TCM | Myricadiol           | PGR   |
| Wuweizi | WWZ50 | 3084282   | BATMAN-TCM | Myricadiol           | VDR   |
| Wuweizi | WWZ51 | MOL009219 | TCMSP      | neokadsuranic acid C | NR3C1 |
| Wuweizi | WWZ52 | MOL009220 | TCMSP      | neokadsuranin        | AR    |
| Wuweizi | WWZ52 | MOL009220 | TCMSP      | neokadsuranin        | PTGS2 |
| Wuweizi | WWZ53 | 67296     | BATMAN-TCM | Nonylphenol          | ACHE  |
| Wuweizi | WWZ53 | 67296     | BATMAN-TCM | Nonylphenol          | ALOX5 |
| Wuweizi | WWZ53 | 67296     | BATMAN-TCM | Nonylphenol          | BCHE  |
| Wuweizi | WWZ53 | 67296     | BATMAN-TCM | Nonylphenol          | COLQ  |
| Wuweizi | WWZ53 | 67296     | BATMAN-TCM | Nonylphenol          | ESR1  |
| Wuweizi | WWZ53 | 67296     | BATMAN-TCM | Nonylphenol          | ESR2  |

|         |       |       |            |             |        |
|---------|-------|-------|------------|-------------|--------|
| Wuweizi | WWZ53 | 67296 | BATMAN-TCM | Nonylphenol | GABRA1 |
| Wuweizi | WWZ53 | 67296 | BATMAN-TCM | Nonylphenol | GABRA2 |
| Wuweizi | WWZ53 | 67296 | BATMAN-TCM | Nonylphenol | GABRA3 |
| Wuweizi | WWZ53 | 67296 | BATMAN-TCM | Nonylphenol | GABRA4 |
| Wuweizi | WWZ53 | 67296 | BATMAN-TCM | Nonylphenol | GABRA5 |
| Wuweizi | WWZ53 | 67296 | BATMAN-TCM | Nonylphenol | GABRA6 |
| Wuweizi | WWZ53 | 67296 | BATMAN-TCM | Nonylphenol | GABRB1 |
| Wuweizi | WWZ53 | 67296 | BATMAN-TCM | Nonylphenol | GABRB2 |
| Wuweizi | WWZ53 | 67296 | BATMAN-TCM | Nonylphenol | GABRB3 |
| Wuweizi | WWZ53 | 67296 | BATMAN-TCM | Nonylphenol | GABRD  |
| Wuweizi | WWZ53 | 67296 | BATMAN-TCM | Nonylphenol | GABRE  |
| Wuweizi | WWZ53 | 67296 | BATMAN-TCM | Nonylphenol | GABRG2 |
| Wuweizi | WWZ53 | 67296 | BATMAN-TCM | Nonylphenol | GABRG3 |
| Wuweizi | WWZ53 | 67296 | BATMAN-TCM | Nonylphenol | GABRQ  |
| Wuweizi | WWZ53 | 67296 | BATMAN-TCM | Nonylphenol | LTA    |

|         |       |         |            |             |             |
|---------|-------|---------|------------|-------------|-------------|
| Wuweizi | WWZ53 | 67296   | BATMAN-TCM | Nonylphenol | NR1I2       |
| Wuweizi | WWZ53 | 67296   | BATMAN-TCM | Nonylphenol | PDE3A       |
| Wuweizi | WWZ53 | 67296   | BATMAN-TCM | Nonylphenol | PDE3B       |
| Wuweizi | WWZ53 | 67296   | BATMAN-TCM | Nonylphenol | PDE4B       |
| Wuweizi | WWZ53 | 67296   | BATMAN-TCM | Nonylphenol | PDE4D       |
| Wuweizi | WWZ53 | 67296   | BATMAN-TCM | Nonylphenol | PTGS1       |
| Wuweizi | WWZ53 | 67296   | BATMAN-TCM | Nonylphenol | PTGS2       |
| Wuweizi | WWZ53 | 67296   | BATMAN-TCM | Nonylphenol | RXRA        |
| Wuweizi | WWZ53 | 67296   | BATMAN-TCM | Nonylphenol | SCN2A       |
| Wuweizi | WWZ53 | 67296   | BATMAN-TCM | Nonylphenol | SCN4A       |
| Wuweizi | WWZ53 | 67296   | BATMAN-TCM | Nonylphenol | TNF         |
| Wuweizi | WWZ54 | 1268142 | BATMAN-TCM | Nootkatone  | ADA         |
| Wuweizi | WWZ54 | 1268142 | BATMAN-TCM | Nootkatone  | ADORA<br>1  |
| Wuweizi | WWZ54 | 1268142 | BATMAN-TCM | Nootkatone  | ADORA<br>2A |
| Wuweizi | WWZ54 | 1268142 | BATMAN-TCM | Nootkatone  | ADORA<br>2B |

|         |       |         |            |            |         |
|---------|-------|---------|------------|------------|---------|
| Wuweizi | WWZ54 | 1268142 | BATMAN-TCM | Nootkatone | AMPD3   |
| Wuweizi | WWZ54 | 1268142 | BATMAN-TCM | Nootkatone | ANXA1   |
| Wuweizi | WWZ54 | 1268142 | BATMAN-TCM | Nootkatone | AR      |
| Wuweizi | WWZ54 | 1268142 | BATMAN-TCM | Nootkatone | ATM     |
| Wuweizi | WWZ54 | 1268142 | BATMAN-TCM | Nootkatone | CX3CR1  |
| Wuweizi | WWZ54 | 1268142 | BATMAN-TCM | Nootkatone | CYP17A1 |
| Wuweizi | WWZ54 | 1268142 | BATMAN-TCM | Nootkatone | CYP19A1 |
| Wuweizi | WWZ54 | 1268142 | BATMAN-TCM | Nootkatone | ESR1    |
| Wuweizi | WWZ54 | 1268142 | BATMAN-TCM | Nootkatone | HAP1    |
| Wuweizi | WWZ54 | 1268142 | BATMAN-TCM | Nootkatone | HDAC2   |
| Wuweizi | WWZ54 | 1268142 | BATMAN-TCM | Nootkatone | IDNK    |
| Wuweizi | WWZ54 | 1268142 | BATMAN-TCM | Nootkatone | ITPR1   |
| Wuweizi | WWZ54 | 1268142 | BATMAN-TCM | Nootkatone | ITPR2   |
| Wuweizi | WWZ54 | 1268142 | BATMAN-TCM | Nootkatone | ITPR3   |
| Wuweizi | WWZ54 | 1268142 | BATMAN-TCM | Nootkatone | NR3C1   |

|         |       |         |            |            |        |
|---------|-------|---------|------------|------------|--------|
| Wuweizi | WWZ54 | 1268142 | BATMAN-TCM | Nootkatone | NR3C2  |
| Wuweizi | WWZ54 | 1268142 | BATMAN-TCM | Nootkatone | NT5E   |
| Wuweizi | WWZ54 | 1268142 | BATMAN-TCM | Nootkatone | OPRK1  |
| Wuweizi | WWZ54 | 1268142 | BATMAN-TCM | Nootkatone | PDE10A |
| Wuweizi | WWZ54 | 1268142 | BATMAN-TCM | Nootkatone | PDE11A |
| Wuweizi | WWZ54 | 1268142 | BATMAN-TCM | Nootkatone | PDE2A  |
| Wuweizi | WWZ54 | 1268142 | BATMAN-TCM | Nootkatone | PDE3A  |
| Wuweizi | WWZ54 | 1268142 | BATMAN-TCM | Nootkatone | PDE3B  |
| Wuweizi | WWZ54 | 1268142 | BATMAN-TCM | Nootkatone | PDE4A  |
| Wuweizi | WWZ54 | 1268142 | BATMAN-TCM | Nootkatone | PDE4B  |
| Wuweizi | WWZ54 | 1268142 | BATMAN-TCM | Nootkatone | PDE4C  |
| Wuweizi | WWZ54 | 1268142 | BATMAN-TCM | Nootkatone | PDE4D  |
| Wuweizi | WWZ54 | 1268142 | BATMAN-TCM | Nootkatone | PDE5A  |
| Wuweizi | WWZ54 | 1268142 | BATMAN-TCM | Nootkatone | PDE6A  |
| Wuweizi | WWZ54 | 1268142 | BATMAN-TCM | Nootkatone | PDE6C  |

|         |       |         |            |                                 |        |
|---------|-------|---------|------------|---------------------------------|--------|
| Wuweizi | WWZ54 | 1268142 | BATMAN-TCM | Nootkatone                      | PDE8B  |
| Wuweizi | WWZ54 | 1268142 | BATMAN-TCM | Nootkatone                      | PGD    |
| Wuweizi | WWZ54 | 1268142 | BATMAN-TCM | Nootkatone                      | PGR    |
| Wuweizi | WWZ54 | 1268142 | BATMAN-TCM | Nootkatone                      | PIK3CA |
| Wuweizi | WWZ54 | 1268142 | BATMAN-TCM | Nootkatone                      | PIK3CB |
| Wuweizi | WWZ54 | 1268142 | BATMAN-TCM | Nootkatone                      | PIK3CD |
| Wuweizi | WWZ54 | 1268142 | BATMAN-TCM | Nootkatone                      | PIK3R1 |
| Wuweizi | WWZ54 | 1268142 | BATMAN-TCM | Nootkatone                      | PRKDC  |
| Wuweizi | WWZ54 | 1268142 | BATMAN-TCM | Nootkatone                      | RINT1  |
| Wuweizi | WWZ54 | 1268142 | BATMAN-TCM | Nootkatone                      | RIPK1  |
| Wuweizi | WWZ54 | 1268142 | BATMAN-TCM | Nootkatone                      | RYR1   |
| Wuweizi | WWZ54 | 1268142 | BATMAN-TCM | Nootkatone                      | SRD5A1 |
| Wuweizi | WWZ54 | 1268142 | BATMAN-TCM | Nootkatone                      | TACR2  |
| Wuweizi | WWZ54 | 1268142 | BATMAN-TCM | Nootkatone                      | WNT4   |
| Wuweizi | WWZ55 | 160168  | BATMAN-TCM | 2-(P-Cyclohexyl-Phenoxy)Ethanol | ALOX5  |

|         |       |        |            |                                 |            |
|---------|-------|--------|------------|---------------------------------|------------|
| Wuweizi | WWZ55 | 160168 | BATMAN-TCM | 2-(P-Cyclohexyl-Phenoxy)Ethanol | CETP       |
| Wuweizi | WWZ55 | 160168 | BATMAN-TCM | 2-(P-Cyclohexyl-Phenoxy)Ethanol | LPL        |
| Wuweizi | WWZ55 | 160168 | BATMAN-TCM | 2-(P-Cyclohexyl-Phenoxy)Ethanol | PTGS1      |
| Wuweizi | WWZ55 | 160168 | BATMAN-TCM | 2-(P-Cyclohexyl-Phenoxy)Ethanol | PTGS2      |
| Wuweizi | WWZ56 | 7463   | BATMAN-TCM | P-Cymene                        | F2         |
| Wuweizi | WWZ56 | 7463   | BATMAN-TCM | P-Cymene                        | GABRB2     |
| Wuweizi | WWZ56 | 7463   | BATMAN-TCM | P-Cymene                        | GABRB3     |
| Wuweizi | WWZ57 | 7678   | BATMAN-TCM | Phenyl-2-Propanone              | ADRA1<br>A |
| Wuweizi | WWZ57 | 7678   | BATMAN-TCM | Phenyl-2-Propanone              | ADRA1<br>B |
| Wuweizi | WWZ57 | 7678   | BATMAN-TCM | Phenyl-2-Propanone              | ADRA2<br>A |
| Wuweizi | WWZ57 | 7678   | BATMAN-TCM | Phenyl-2-Propanone              | ADRA2<br>B |
| Wuweizi | WWZ57 | 7678   | BATMAN-TCM | Phenyl-2-Propanone              | ADRA2<br>C |
| Wuweizi | WWZ57 | 7678   | BATMAN-TCM | Phenyl-2-Propanone              | ADRB1      |
| Wuweizi | WWZ57 | 7678   | BATMAN-TCM | Phenyl-2-Propanone              | ADRB2      |
| Wuweizi | WWZ57 | 7678   | BATMAN-TCM | Phenyl-2-Propanone              | ADRB3      |



|         |       |      |            |                    |         |
|---------|-------|------|------------|--------------------|---------|
| Wuweizi | WWZ57 | 7678 | BATMAN-TCM | Phenyl-2-Propanone | BCL2    |
| Wuweizi | WWZ57 | 7678 | BATMAN-TCM | Phenyl-2-Propanone | CACNA1G |
| Wuweizi | WWZ57 | 7678 | BATMAN-TCM | Phenyl-2-Propanone | CACNA1H |
| Wuweizi | WWZ57 | 7678 | BATMAN-TCM | Phenyl-2-Propanone | CARTPT  |
| Wuweizi | WWZ57 | 7678 | BATMAN-TCM | Phenyl-2-Propanone | CFTR    |
| Wuweizi | WWZ57 | 7678 | BATMAN-TCM | Phenyl-2-Propanone | CYP11B1 |
| Wuweizi | WWZ57 | 7678 | BATMAN-TCM | Phenyl-2-Propanone | CYP11B2 |
| Wuweizi | WWZ57 | 7678 | BATMAN-TCM | Phenyl-2-Propanone | DRD2    |
| Wuweizi | WWZ57 | 7678 | BATMAN-TCM | Phenyl-2-Propanone | FABP2   |
| Wuweizi | WWZ57 | 7678 | BATMAN-TCM | Phenyl-2-Propanone | LCT     |
| Wuweizi | WWZ57 | 7678 | BATMAN-TCM | Phenyl-2-Propanone | MAOA    |
| Wuweizi | WWZ57 | 7678 | BATMAN-TCM | Phenyl-2-Propanone | MAOB    |
| Wuweizi | WWZ57 | 7678 | BATMAN-TCM | Phenyl-2-Propanone | PLAT    |
| Wuweizi | WWZ57 | 7678 | BATMAN-TCM | Phenyl-2-Propanone | PPARG   |
| Wuweizi | WWZ57 | 7678 | BATMAN-TCM | Phenyl-2-Propanone | PTGIS   |

|         |       |        |            |                      |           |
|---------|-------|--------|------------|----------------------|-----------|
| Wuweizi | WWZ57 | 7678   | BATMAN-TCM | Phenyl-2-Propanone   | PTGS1     |
| Wuweizi | WWZ57 | 7678   | BATMAN-TCM | Phenyl-2-Propanone   | PTGS2     |
| Wuweizi | WWZ57 | 7678   | BATMAN-TCM | Phenyl-2-Propanone   | SERPIN B7 |
| Wuweizi | WWZ57 | 7678   | BATMAN-TCM | Phenyl-2-Propanone   | SLC18A2   |
| Wuweizi | WWZ57 | 7678   | BATMAN-TCM | Phenyl-2-Propanone   | SLC6A2    |
| Wuweizi | WWZ57 | 7678   | BATMAN-TCM | Phenyl-2-Propanone   | SLC6A3    |
| Wuweizi | WWZ57 | 7678   | BATMAN-TCM | Phenyl-2-Propanone   | SLC6A4    |
| Wuweizi | WWZ57 | 7678   | BATMAN-TCM | Phenyl-2-Propanone   | THBD      |
| Wuweizi | WWZ57 | 7678   | BATMAN-TCM | Phenyl-2-Propanone   | VKORC1    |
| Wuweizi | WWZ58 | 561514 | BATMAN-TCM | Phenylpropyl Alcohol | ADA       |
| Wuweizi | WWZ58 | 561514 | BATMAN-TCM | Phenylpropyl Alcohol | ADORA1    |
| Wuweizi | WWZ58 | 561514 | BATMAN-TCM | Phenylpropyl Alcohol | ADRA1A    |
| Wuweizi | WWZ58 | 561514 | BATMAN-TCM | Phenylpropyl Alcohol | ADRA1B    |
| Wuweizi | WWZ58 | 561514 | BATMAN-TCM | Phenylpropyl Alcohol | ADRA2A    |
| Wuweizi | WWZ58 | 561514 | BATMAN-TCM | Phenylpropyl Alcohol | ADRA2B    |

|         |       |        |            |                      |        |
|---------|-------|--------|------------|----------------------|--------|
| Wuweizi | WWZ58 | 561514 | BATMAN-TCM | Phenylpropyl Alcohol | ADRA2C |
| Wuweizi | WWZ58 | 561514 | BATMAN-TCM | Phenylpropyl Alcohol | ADRB1  |
| Wuweizi | WWZ58 | 561514 | BATMAN-TCM | Phenylpropyl Alcohol | ADRB2  |
| Wuweizi | WWZ58 | 561514 | BATMAN-TCM | Phenylpropyl Alcohol | ADRB3  |
| Wuweizi | WWZ58 | 561514 | BATMAN-TCM | Phenylpropyl Alcohol | BCL2   |
| Wuweizi | WWZ58 | 561514 | BATMAN-TCM | Phenylpropyl Alcohol | CARTPT |
| Wuweizi | WWZ58 | 561514 | BATMAN-TCM | Phenylpropyl Alcohol | CFTR   |
| Wuweizi | WWZ58 | 561514 | BATMAN-TCM | Phenylpropyl Alcohol | DGUOK  |
| Wuweizi | WWZ58 | 561514 | BATMAN-TCM | Phenylpropyl Alcohol | DRD1   |
| Wuweizi | WWZ58 | 561514 | BATMAN-TCM | Phenylpropyl Alcohol | DRD2   |
| Wuweizi | WWZ58 | 561514 | BATMAN-TCM | Phenylpropyl Alcohol | FABP2  |
| Wuweizi | WWZ58 | 561514 | BATMAN-TCM | Phenylpropyl Alcohol | FARS2  |
| Wuweizi | WWZ58 | 561514 | BATMAN-TCM | Phenylpropyl Alcohol | FARSB  |
| Wuweizi | WWZ58 | 561514 | BATMAN-TCM | Phenylpropyl Alcohol | MAOA   |
| Wuweizi | WWZ58 | 561514 | BATMAN-TCM | Phenylpropyl Alcohol | MAOB   |

|         |       |        |            |                      |         |
|---------|-------|--------|------------|----------------------|---------|
| Wuweizi | WWZ58 | 561514 | BATMAN-TCM | Phenylpropyl Alcohol | PAH     |
| Wuweizi | WWZ58 | 561514 | BATMAN-TCM | Phenylpropyl Alcohol | PDE10A  |
| Wuweizi | WWZ58 | 561514 | BATMAN-TCM | Phenylpropyl Alcohol | PDE4A   |
| Wuweizi | WWZ58 | 561514 | BATMAN-TCM | Phenylpropyl Alcohol | PDE5A   |
| Wuweizi | WWZ58 | 561514 | BATMAN-TCM | Phenylpropyl Alcohol | PLAT    |
| Wuweizi | WWZ58 | 561514 | BATMAN-TCM | Phenylpropyl Alcohol | PPARG   |
| Wuweizi | WWZ58 | 561514 | BATMAN-TCM | Phenylpropyl Alcohol | PTGS1   |
| Wuweizi | WWZ58 | 561514 | BATMAN-TCM | Phenylpropyl Alcohol | PTGS2   |
| Wuweizi | WWZ58 | 561514 | BATMAN-TCM | Phenylpropyl Alcohol | SLC18A2 |
| Wuweizi | WWZ58 | 561514 | BATMAN-TCM | Phenylpropyl Alcohol | SLC6A2  |
| Wuweizi | WWZ58 | 561514 | BATMAN-TCM | Phenylpropyl Alcohol | SLC6A3  |
| Wuweizi | WWZ58 | 561514 | BATMAN-TCM | Phenylpropyl Alcohol | SLC6A4  |
| Wuweizi | WWZ58 | 561514 | BATMAN-TCM | Phenylpropyl Alcohol | SLC7A8  |
| Wuweizi | WWZ58 | 561514 | BATMAN-TCM | Phenylpropyl Alcohol | TAT     |
| Wuweizi | WWZ58 | 561514 | BATMAN-TCM | Phenylpropyl Alcohol | TH      |

|         |       |           |            |                      |       |
|---------|-------|-----------|------------|----------------------|-------|
| Wuweizi | WWZ58 | 561514    | BATMAN-TCM | Phenylpropyl Alcohol | THBD  |
| Wuweizi | WWZ58 | 561514    | BATMAN-TCM | Phenylpropyl Alcohol | XDH   |
| Wuweizi | WWZ59 | 181796    | BATMAN-TCM | Pregomisin           | ALOX5 |
| Wuweizi | WWZ59 | 181796    | BATMAN-TCM | Pregomisin           | DCT   |
| Wuweizi | WWZ59 | 181796    | BATMAN-TCM | Pregomisin           | ESR1  |
| Wuweizi | WWZ59 | 181796    | BATMAN-TCM | Pregomisin           | TYR   |
| Wuweizi | WWZ59 | 181796    | BATMAN-TCM | Pregomisin           | TYRP1 |
| Wuweizi | WWZ6  | MOL008956 | TCMSP      | Angeloylgomisin O    | AR    |
| Wuweizi | WWZ60 | 73057     | BATMAN-TCM | Schisanhenol         | DCT   |
| Wuweizi | WWZ60 | 73057     | BATMAN-TCM | Schisanhenol         | TYR   |
| Wuweizi | WWZ60 | 73057     | BATMAN-TCM | Schisanhenol         | TYRP1 |
| Wuweizi | WWZ61 | MOL008957 | TCMSP      | Schizandrer B        | PTGS2 |
| Wuweizi | WWZ62 | 11074502  | BATMAN-TCM | Sesquicarene         | ADH1A |
| Wuweizi | WWZ62 | 11074502  | BATMAN-TCM | Sesquicarene         | ADH1B |
| Wuweizi | WWZ62 | 11074502  | BATMAN-TCM | Sesquicarene         | ADH1C |

|         |       |          |            |              |       |
|---------|-------|----------|------------|--------------|-------|
| Wuweizi | WWZ62 | 11074502 | BATMAN-TCM | Sesquicarene | ALDH2 |
| Wuweizi | WWZ62 | 11074502 | BATMAN-TCM | Sesquicarene | CAT   |
| Wuweizi | WWZ62 | 11074502 | BATMAN-TCM | Sesquicarene | DLG4  |
| Wuweizi | WWZ62 | 11074502 | BATMAN-TCM | Sesquicarene | ESR1  |
| Wuweizi | WWZ62 | 11074502 | BATMAN-TCM | Sesquicarene | GAMT  |
| Wuweizi | WWZ62 | 11074502 | BATMAN-TCM | Sesquicarene | GATM  |
| Wuweizi | WWZ62 | 11074502 | BATMAN-TCM | Sesquicarene | IYD   |
| Wuweizi | WWZ62 | 11074502 | BATMAN-TCM | Sesquicarene | KCNA1 |
| Wuweizi | WWZ62 | 11074502 | BATMAN-TCM | Sesquicarene | KCNA2 |
| Wuweizi | WWZ62 | 11074502 | BATMAN-TCM | Sesquicarene | KCNA4 |
| Wuweizi | WWZ62 | 11074502 | BATMAN-TCM | Sesquicarene | KCNA5 |
| Wuweizi | WWZ62 | 11074502 | BATMAN-TCM | Sesquicarene | KCNB1 |
| Wuweizi | WWZ62 | 11074502 | BATMAN-TCM | Sesquicarene | KCNC1 |
| Wuweizi | WWZ62 | 11074502 | BATMAN-TCM | Sesquicarene | KCNC3 |
| Wuweizi | WWZ62 | 11074502 | BATMAN-TCM | Sesquicarene | KCND1 |

|         |       |          |            |               |        |
|---------|-------|----------|------------|---------------|--------|
| Wuweizi | WWZ62 | 11074502 | BATMAN-TCM | Sesquicarene  | KCND2  |
| Wuweizi | WWZ62 | 11074502 | BATMAN-TCM | Sesquicarene  | KCND3  |
| Wuweizi | WWZ62 | 11074502 | BATMAN-TCM | Sesquicarene  | KCNK4  |
| Wuweizi | WWZ62 | 11074502 | BATMAN-TCM | Sesquicarene  | KCNQ1  |
| Wuweizi | WWZ62 | 11074502 | BATMAN-TCM | Sesquicarene  | PGR    |
| Wuweizi | WWZ62 | 11074502 | BATMAN-TCM | Sesquicarene  | PRKAB1 |
| Wuweizi | WWZ62 | 11074502 | BATMAN-TCM | Sesquicarene  | RNASE1 |
| Wuweizi | WWZ62 | 11074502 | BATMAN-TCM | Sesquicarene  | TPO    |
| Wuweizi | WWZ63 | 11230    | BATMAN-TCM | Terpinen-4-Ol | AR     |
| Wuweizi | WWZ63 | 11230    | BATMAN-TCM | Terpinen-4-Ol | ESR1   |
| Wuweizi | WWZ63 | 11230    | BATMAN-TCM | Terpinen-4-Ol | NR3C1  |
| Wuweizi | WWZ63 | 11230    | BATMAN-TCM | Terpinen-4-Ol | PGR    |
| Wuweizi | WWZ63 | 11230    | BATMAN-TCM | Terpinen-4-Ol | VDR    |
| Wuweizi | WWZ63 | 11230    | BATMAN-TCM | Terpinen-4-Ol | WNT4   |
| Wuweizi | WWZ64 | 442402   | BATMAN-TCM | Thujopsene    | ADH1A  |

|         |       |        |            |            |       |
|---------|-------|--------|------------|------------|-------|
| Wuweizi | WWZ64 | 442402 | BATMAN-TCM | Thujopsene | ADH1B |
| Wuweizi | WWZ64 | 442402 | BATMAN-TCM | Thujopsene | ADH1C |
| Wuweizi | WWZ64 | 442402 | BATMAN-TCM | Thujopsene | ALDH2 |
| Wuweizi | WWZ64 | 442402 | BATMAN-TCM | Thujopsene | CAT   |
| Wuweizi | WWZ64 | 442402 | BATMAN-TCM | Thujopsene | DLG4  |
| Wuweizi | WWZ64 | 442402 | BATMAN-TCM | Thujopsene | ESR1  |
| Wuweizi | WWZ64 | 442402 | BATMAN-TCM | Thujopsene | GAMT  |
| Wuweizi | WWZ64 | 442402 | BATMAN-TCM | Thujopsene | GATM  |
| Wuweizi | WWZ64 | 442402 | BATMAN-TCM | Thujopsene | IYD   |
| Wuweizi | WWZ64 | 442402 | BATMAN-TCM | Thujopsene | KCNA1 |
| Wuweizi | WWZ64 | 442402 | BATMAN-TCM | Thujopsene | KCNA2 |
| Wuweizi | WWZ64 | 442402 | BATMAN-TCM | Thujopsene | KCNA4 |
| Wuweizi | WWZ64 | 442402 | BATMAN-TCM | Thujopsene | KCNA5 |
| Wuweizi | WWZ64 | 442402 | BATMAN-TCM | Thujopsene | KCNB1 |
| Wuweizi | WWZ64 | 442402 | BATMAN-TCM | Thujopsene | KCNC1 |



|         |       |         |            |            |        |
|---------|-------|---------|------------|------------|--------|
| Wuweizi | WWZ64 | 442402  | BATMAN-TCM | Thujopsene | KCNC3  |
| Wuweizi | WWZ64 | 442402  | BATMAN-TCM | Thujopsene | KCND1  |
| Wuweizi | WWZ64 | 442402  | BATMAN-TCM | Thujopsene | KCND2  |
| Wuweizi | WWZ64 | 442402  | BATMAN-TCM | Thujopsene | KCND3  |
| Wuweizi | WWZ64 | 442402  | BATMAN-TCM | Thujopsene | KCNK4  |
| Wuweizi | WWZ64 | 442402  | BATMAN-TCM | Thujopsene | KCNQ1  |
| Wuweizi | WWZ64 | 442402  | BATMAN-TCM | Thujopsene | PGR    |
| Wuweizi | WWZ64 | 442402  | BATMAN-TCM | Thujopsene | PRKAB1 |
| Wuweizi | WWZ64 | 442402  | BATMAN-TCM | Thujopsene | RNASE1 |
| Wuweizi | WWZ64 | 442402  | BATMAN-TCM | Thujopsene | TPO    |
| Wuweizi | WWZ65 | 5284607 | BATMAN-TCM | Vitamin K1 | KCNK4  |
| Wuweizi | WWZ65 | 5284607 | BATMAN-TCM | Vitamin K1 | TRPA1  |
| Wuweizi | WWZ65 | 5284607 | BATMAN-TCM | Vitamin K1 | TRPM8  |
| Wuweizi | WWZ65 | 5284607 | BATMAN-TCM | Vitamin K1 | OPRK1  |
| Wuweizi | WWZ65 | 5284607 | BATMAN-TCM | Vitamin K1 | TRPV3  |

|         |       |           |            |                             |        |
|---------|-------|-----------|------------|-----------------------------|--------|
| Wuweizi | WWZ65 | 5284607   | BATMAN-TCM | Vitamin K1                  | AR     |
| Wuweizi | WWZ66 | MOL008992 | TCMSP      | Wuweizisu C                 | ACHE   |
| Wuweizi | WWZ66 | MOL008992 | TCMSP      | Wuweizisu C                 | GABRA1 |
| Wuweizi | WWZ67 | 14104     | BATMAN-TCM | 2-Isopropyl-5-Methylanisole | GABRA1 |
| Wuweizi | WWZ67 | 14104     | BATMAN-TCM | 2-Isopropyl-5-Methylanisole | GABRA2 |
| Wuweizi | WWZ67 | 14104     | BATMAN-TCM | 2-Isopropyl-5-Methylanisole | GABRA3 |
| Wuweizi | WWZ67 | 14104     | BATMAN-TCM | 2-Isopropyl-5-Methylanisole | GABRA4 |
| Wuweizi | WWZ67 | 14104     | BATMAN-TCM | 2-Isopropyl-5-Methylanisole | GABRA5 |
| Wuweizi | WWZ67 | 14104     | BATMAN-TCM | 2-Isopropyl-5-Methylanisole | GABRA6 |
| Wuweizi | WWZ67 | 14104     | BATMAN-TCM | 2-Isopropyl-5-Methylanisole | GABRB1 |
| Wuweizi | WWZ67 | 14104     | BATMAN-TCM | 2-Isopropyl-5-Methylanisole | GABRB2 |
| Wuweizi | WWZ67 | 14104     | BATMAN-TCM | 2-Isopropyl-5-Methylanisole | GABRB3 |
| Wuweizi | WWZ67 | 14104     | BATMAN-TCM | 2-Isopropyl-5-Methylanisole | GABRD  |
| Wuweizi | WWZ67 | 14104     | BATMAN-TCM | 2-Isopropyl-5-Methylanisole | GABRE  |
| Wuweizi | WWZ67 | 14104     | BATMAN-TCM | 2-Isopropyl-5-Methylanisole | GABRG2 |

|         |       |          |            |                             |         |
|---------|-------|----------|------------|-----------------------------|---------|
| Wuweizi | WWZ67 | 14104    | BATMAN-TCM | 2-Isopropyl-5-Methylanisole | GABRG3  |
| Wuweizi | WWZ67 | 14104    | BATMAN-TCM | 2-Isopropyl-5-Methylanisole | GABRQ   |
| Wuweizi | WWZ67 | 14104    | BATMAN-TCM | 2-Isopropyl-5-Methylanisole | PDE10A  |
| Wuweizi | WWZ67 | 14104    | BATMAN-TCM | 2-Isopropyl-5-Methylanisole | PDE4B   |
| Wuweizi | WWZ67 | 14104    | BATMAN-TCM | 2-Isopropyl-5-Methylanisole | PDE4D   |
| Wuweizi | WWZ67 | 14104    | BATMAN-TCM | 2-Isopropyl-5-Methylanisole | SCN2A   |
| Wuweizi | WWZ67 | 14104    | BATMAN-TCM | 2-Isopropyl-5-Methylanisole | SCN4A   |
| Wuweizi | WWZ7  | 10104370 | BATMAN-TCM | Beta-Bisabolene             | ADH1A   |
| Wuweizi | WWZ7  | 10104370 | BATMAN-TCM | Beta-Bisabolene             | ADH1B   |
| Wuweizi | WWZ7  | 10104370 | BATMAN-TCM | Beta-Bisabolene             | ADH1C   |
| Wuweizi | WWZ7  | 10104370 | BATMAN-TCM | Beta-Bisabolene             | ALDH2   |
| Wuweizi | WWZ7  | 10104370 | BATMAN-TCM | Beta-Bisabolene             | CAT     |
| Wuweizi | WWZ7  | 10104370 | BATMAN-TCM | Beta-Bisabolene             | CYP17A1 |
| Wuweizi | WWZ7  | 10104370 | BATMAN-TCM | Beta-Bisabolene             | DLG4    |
| Wuweizi | WWZ7  | 10104370 | BATMAN-TCM | Beta-Bisabolene             | ESR1    |

|         |      |          |            |                 |       |
|---------|------|----------|------------|-----------------|-------|
| Wuweizi | WWZ7 | 10104370 | BATMAN-TCM | Beta-Bisabolene | GAMT  |
| Wuweizi | WWZ7 | 10104370 | BATMAN-TCM | Beta-Bisabolene | GATM  |
| Wuweizi | WWZ7 | 10104370 | BATMAN-TCM | Beta-Bisabolene | IYD   |
| Wuweizi | WWZ7 | 10104370 | BATMAN-TCM | Beta-Bisabolene | KCNA1 |
| Wuweizi | WWZ7 | 10104370 | BATMAN-TCM | Beta-Bisabolene | KCNA2 |
| Wuweizi | WWZ7 | 10104370 | BATMAN-TCM | Beta-Bisabolene | KCNA4 |
| Wuweizi | WWZ7 | 10104370 | BATMAN-TCM | Beta-Bisabolene | KCNA5 |
| Wuweizi | WWZ7 | 10104370 | BATMAN-TCM | Beta-Bisabolene | KCNB1 |
| Wuweizi | WWZ7 | 10104370 | BATMAN-TCM | Beta-Bisabolene | KCNC1 |
| Wuweizi | WWZ7 | 10104370 | BATMAN-TCM | Beta-Bisabolene | KCNC3 |
| Wuweizi | WWZ7 | 10104370 | BATMAN-TCM | Beta-Bisabolene | KCND1 |
| Wuweizi | WWZ7 | 10104370 | BATMAN-TCM | Beta-Bisabolene | KCND2 |
| Wuweizi | WWZ7 | 10104370 | BATMAN-TCM | Beta-Bisabolene | KCND3 |
| Wuweizi | WWZ7 | 10104370 | BATMAN-TCM | Beta-Bisabolene | KCNK4 |
| Wuweizi | WWZ7 | 10104370 | BATMAN-TCM | Beta-Bisabolene | KCNQ1 |

|         |      |          |            |                 |         |
|---------|------|----------|------------|-----------------|---------|
| Wuweizi | WWZ7 | 10104370 | BATMAN-TCM | Beta-Bisabolene | NR3C2   |
| Wuweizi | WWZ7 | 10104370 | BATMAN-TCM | Beta-Bisabolene | OPRK1   |
| Wuweizi | WWZ7 | 10104370 | BATMAN-TCM | Beta-Bisabolene | PGR     |
| Wuweizi | WWZ7 | 10104370 | BATMAN-TCM | Beta-Bisabolene | PRKAB1  |
| Wuweizi | WWZ7 | 10104370 | BATMAN-TCM | Beta-Bisabolene | RNASE1  |
| Wuweizi | WWZ7 | 10104370 | BATMAN-TCM | Beta-Bisabolene | TPO     |
| Wuweizi | WWZ8 | 442353   | BATMAN-TCM | Beta-Chamigrene | ADH1A   |
| Wuweizi | WWZ8 | 442353   | BATMAN-TCM | Beta-Chamigrene | ADH1B   |
| Wuweizi | WWZ8 | 442353   | BATMAN-TCM | Beta-Chamigrene | ADH1C   |
| Wuweizi | WWZ8 | 442353   | BATMAN-TCM | Beta-Chamigrene | ALDH2   |
| Wuweizi | WWZ8 | 442353   | BATMAN-TCM | Beta-Chamigrene | CAT     |
| Wuweizi | WWZ8 | 442353   | BATMAN-TCM | Beta-Chamigrene | CYP17A1 |
| Wuweizi | WWZ8 | 442353   | BATMAN-TCM | Beta-Chamigrene | DLG4    |
| Wuweizi | WWZ8 | 442353   | BATMAN-TCM | Beta-Chamigrene | ESR1    |
| Wuweizi | WWZ8 | 442353   | BATMAN-TCM | Beta-Chamigrene | GAMT    |

|         |      |        |            |                 |       |
|---------|------|--------|------------|-----------------|-------|
| Wuweizi | WWZ8 | 442353 | BATMAN-TCM | Beta-Chamigrene | GATM  |
| Wuweizi | WWZ8 | 442353 | BATMAN-TCM | Beta-Chamigrene | IYD   |
| Wuweizi | WWZ8 | 442353 | BATMAN-TCM | Beta-Chamigrene | KCNA1 |
| Wuweizi | WWZ8 | 442353 | BATMAN-TCM | Beta-Chamigrene | KCNA2 |
| Wuweizi | WWZ8 | 442353 | BATMAN-TCM | Beta-Chamigrene | KCNA4 |
| Wuweizi | WWZ8 | 442353 | BATMAN-TCM | Beta-Chamigrene | KCNA5 |
| Wuweizi | WWZ8 | 442353 | BATMAN-TCM | Beta-Chamigrene | KCNB1 |
| Wuweizi | WWZ8 | 442353 | BATMAN-TCM | Beta-Chamigrene | KCNC1 |
| Wuweizi | WWZ8 | 442353 | BATMAN-TCM | Beta-Chamigrene | KCNC3 |
| Wuweizi | WWZ8 | 442353 | BATMAN-TCM | Beta-Chamigrene | KCND1 |
| Wuweizi | WWZ8 | 442353 | BATMAN-TCM | Beta-Chamigrene | KCND2 |
| Wuweizi | WWZ8 | 442353 | BATMAN-TCM | Beta-Chamigrene | KCND3 |
| Wuweizi | WWZ8 | 442353 | BATMAN-TCM | Beta-Chamigrene | KCNK4 |
| Wuweizi | WWZ8 | 442353 | BATMAN-TCM | Beta-Chamigrene | KCNQ1 |
| Wuweizi | WWZ8 | 442353 | BATMAN-TCM | Beta-Chamigrene | NR3C2 |

|         |      |        |            |                 |        |
|---------|------|--------|------------|-----------------|--------|
| Wuweizi | WWZ8 | 442353 | BATMAN-TCM | Beta-Chamigrene | OPRK1  |
| Wuweizi | WWZ8 | 442353 | BATMAN-TCM | Beta-Chamigrene | PGR    |
| Wuweizi | WWZ8 | 442353 | BATMAN-TCM | Beta-Chamigrene | PRKAB1 |
| Wuweizi | WWZ8 | 442353 | BATMAN-TCM | Beta-Chamigrene | RNASE1 |
| Wuweizi | WWZ8 | 442353 | BATMAN-TCM | Beta-Chamigrene | TPO    |
| Wuweizi | WWZ9 | 14896  | BATMAN-TCM | Beta-Pinene     | ADH1A  |
| Wuweizi | WWZ9 | 14896  | BATMAN-TCM | Beta-Pinene     | ADH1B  |
| Wuweizi | WWZ9 | 14896  | BATMAN-TCM | Beta-Pinene     | ADH1C  |
| Wuweizi | WWZ9 | 14896  | BATMAN-TCM | Beta-Pinene     | ALDH2  |
| Wuweizi | WWZ9 | 14896  | BATMAN-TCM | Beta-Pinene     | CAT    |
| Wuweizi | WWZ9 | 14896  | BATMAN-TCM | Beta-Pinene     | DLG4   |
| Wuweizi | WWZ9 | 14896  | BATMAN-TCM | Beta-Pinene     | GAMT   |
| Wuweizi | WWZ9 | 14896  | BATMAN-TCM | Beta-Pinene     | GATM   |
| Wuweizi | WWZ9 | 14896  | BATMAN-TCM | Beta-Pinene     | IYD    |
| Wuweizi | WWZ9 | 14896  | BATMAN-TCM | Beta-Pinene     | KCNA1  |

|         |      |       |            |             |        |
|---------|------|-------|------------|-------------|--------|
| Wuweizi | WWZ9 | 14896 | BATMAN-TCM | Beta-Pinene | KCNA2  |
| Wuweizi | WWZ9 | 14896 | BATMAN-TCM | Beta-Pinene | KCNA4  |
| Wuweizi | WWZ9 | 14896 | BATMAN-TCM | Beta-Pinene | KCNA5  |
| Wuweizi | WWZ9 | 14896 | BATMAN-TCM | Beta-Pinene | KCNB1  |
| Wuweizi | WWZ9 | 14896 | BATMAN-TCM | Beta-Pinene | KCNC1  |
| Wuweizi | WWZ9 | 14896 | BATMAN-TCM | Beta-Pinene | KCNC3  |
| Wuweizi | WWZ9 | 14896 | BATMAN-TCM | Beta-Pinene | KCND1  |
| Wuweizi | WWZ9 | 14896 | BATMAN-TCM | Beta-Pinene | KCND2  |
| Wuweizi | WWZ9 | 14896 | BATMAN-TCM | Beta-Pinene | KCND3  |
| Wuweizi | WWZ9 | 14896 | BATMAN-TCM | Beta-Pinene | KCNK4  |
| Wuweizi | WWZ9 | 14896 | BATMAN-TCM | Beta-Pinene | KCNQ1  |
| Wuweizi | WWZ9 | 14896 | BATMAN-TCM | Beta-Pinene | PRKAB1 |
| Wuweizi | WWZ9 | 14896 | BATMAN-TCM | Beta-Pinene | RNASE1 |
| Wuweizi | WWZ9 | 14896 | BATMAN-TCM | Beta-Pinene | TPO    |



Table S4 Drug-Active ingredients-Hub genes-Disease network

| Chinese.h<br>erbal.nam<br>e | Code     | MOLID or<br>CompoundCID | Component                          | targets | Databases  |
|-----------------------------|----------|-------------------------|------------------------------------|---------|------------|
| Bajitian                    | BJT16    | MOL002879               | Diop<br>1-hydroxy-6-               | ADRB2   | TCMSP      |
| Bajitian                    | BJT5     | MOL009504               | hydroxymethylanthracenequi<br>none | ADRB2   | TCMSP      |
| Bajitian                    | BJT15    | MOL000358               | beta-sitosterol                    | ADRB2   | TCMSP      |
| Bajitian                    | BJT15    | MOL000358               | beta-sitosterol                    | CHRM2   | TCMSP      |
| Bajitian                    | BJT19    | MOL009562               | Ohioensin A                        | CNR1    | TCMSP      |
| Bajitian                    | BJT19    | MOL009562               | Ohioensin A                        | CNR2    | TCMSP      |
| Bajitian                    | BJT19    | MOL009562               | Ohioensin A                        | DRD2    | TCMSP      |
| Bajitian                    | BJT15    | MOL000358               | beta-sitosterol                    | OPRM1   | TCMSP      |
| Fuling                      | FL5      | MOL000296               | hederagenin                        | CHRM2   | TCMSP      |
| Fuling&W<br>uweizi          | FL&WWZ3  |                         | 190 Adenine                        | ADCY1   | BATMAN-TCM |
| Fuling&W<br>uweizi          | FL&WWZ3  |                         | 190 Adenine                        | ADORA1  | BATMAN-TCM |
| Fuling&W<br>uweizi          | FL&WWZ3  |                         | 190 Adenine                        | ADORA3  | BATMAN-TCM |
| Fuling&W<br>uweizi          | FL&WWZ9  |                         | 8223 Ergotamine                    | ADRA2A  | BATMAN-TCM |
| Fuling&W<br>uweizi          | FL&WWZ9  |                         | 8223 Ergotamine                    | ADRA2B  | BATMAN-TCM |
| Fuling&W<br>uweizi          | FL&WWZ9  |                         | 8223 Ergotamine                    | ADRA2C  | BATMAN-TCM |
| Fuling&W<br>uweizi          | FL&WWZ13 | MOL000289               | Pachymic Acid                      | ANXA1   | TCMSP      |
| Fuling&W<br>uweizi          | FL&WWZ6  | MOL000300               | Dehydroeburicoicacid               | ANXA1   | TCMSP      |
| Fuling&W<br>uweizi          | FL&WWZ15 | MOL000291               | Poricoic Acid B                    | ANXA1   | TCMSP      |
| Fuling&W<br>uweizi          | FL&WWZ9  |                         | 8223 Ergotamine                    | CNR1    | BATMAN-TCM |
| Fuling&W<br>uweizi          | FL&WWZ16 | 5460935                 | Turanose                           | CXCR4   | BATMAN-TCM |
| Fuling&W<br>uweizi          | FL&WWZ9  |                         | 8223 Ergotamine                    | DRD2    | BATMAN-TCM |
| Fuling&W<br>uweizi          | FL&WWZ9  |                         | 8223 Ergotamine                    | DRD3    | BATMAN-TCM |
| Fuling&W<br>uweizi          | FL&WWZ9  |                         | 8223 Ergotamine                    | DRD4    | BATMAN-TCM |
| Fuling&W<br>uweizi          | FL&WWZ9  |                         | 8223 Ergotamine                    | HTR1A   | BATMAN-TCM |
| Fuling&W<br>uweizi          | FL&WWZ9  |                         | 8223 Ergotamine                    | HTR1B   | BATMAN-TCM |
| Fuling&W<br>uweizi          | FL&WWZ9  |                         | 8223 Ergotamine                    | HTR1D   | BATMAN-TCM |
| Fuling&W<br>uweizi          | FL&WWZ7  | 9803310                 | Eburicol                           | OPRK1   | BATMAN-TCM |
| Fuling&W<br>uweizi          | FL&WWZ6  | MOL000300               | Dehydroeburicoicacid               | OPRK1   | TCMSP      |
| Fuling&W<br>uweizi          | FL&WWZ17 | 15448                   | Undecan-2-OI                       | OPRK1   | BATMAN-TCM |
| Fuling&W<br>uweizi          | FL&WWZ12 | 5316009                 | O-Acetylpachymic Acid-25-<br>OI    | PTGER3  | BATMAN-TCM |

|               |          |           |                                              |        |            |
|---------------|----------|-----------|----------------------------------------------|--------|------------|
| Fuling&Wuwei  | FL&WWZ13 | MOL000289 | Pachymic Acid                                | PTGER3 | TCMSP      |
| Fuling&Wuwei  | FL&WWZ6  | MOL000300 | Dehydroeburicoicacid                         | PTGER3 | TCMSP      |
| Maidong       | MD2      | 135398635 | Guanosine                                    | ADORA1 | BATMAN-TCM |
| Maidong       | MD2      | 135398635 | Guanosine                                    | ADORA3 | BATMAN-TCM |
| Maidong       | MD4      | 5318201   | Methyl Ophiopogonanone B                     | CNR1   | BATMAN-TCM |
| Maidong       | MD10     | 5316797   | Ophiopogonanone E                            | CNR1   | BATMAN-TCM |
| Maidong       | MD3      | 5318201   | Methyl Ophiopogonanone A                     | CNR1   | BATMAN-TCM |
| Maidong       | MD8      | 9996586   | Ophiopogonanone A                            | CNR1   | BATMAN-TCM |
| Maidong       | MD9      | 10871974  | Ophiopogonanone C                            | CNR1   | BATMAN-TCM |
| Maidong       | MD3      | 5318201   | Methyl Ophiopogonanone A                     | CNR2   | BATMAN-TCM |
| Maidong       | MD9      | 10871974  | Ophiopogonanone C                            | CNR2   | BATMAN-TCM |
| Maidong       | MD10     | 5316797   | Ophiopogonanone E                            | CNR2   | BATMAN-TCM |
| Maidong       | MD4      | 5318201   | Methyl Ophiopogonanone B                     | CNR2   | BATMAN-TCM |
| Maidong       | MD8      | 9996586   | Ophiopogonanone A                            | CNR2   | BATMAN-TCM |
| Maidong       | MD10     | 5316797   | Ophiopogonanone E                            | DRD2   | BATMAN-TCM |
| Maidong       | MD4      | 5318201   | Methyl Ophiopogonanone B                     | DRD2   | BATMAN-TCM |
| Maidong       | MD5      | 5280537   | N-Trans-Feruloyltyramine                     | MTNR1A | BATMAN-TCM |
| Maidong       | MD5      | 5280537   | N-Trans-Feruloyltyramine                     | MTNR1B | BATMAN-TCM |
| Shudi&Maidong | SD\$MD2  | MOL000449 | Stigmasterol                                 | ADRA2A | TCMSP      |
| Shudi&Maidong | SD\$MD2  | MOL000449 | Stigmasterol                                 | ADRB2  | TCMSP      |
| Shudi&Maidong | SD\$MD2  | MOL000449 | Stigmasterol                                 | CHRM2  | TCMSP      |
| Shudi&Maidong | SD\$MD2  | MOL000449 | Stigmasterol                                 | OPRK1  | TCMSP      |
| Wuwei         | WWZ58    | 561514    | Phenylpropyl Alcohol                         | ADORA1 | BATMAN-TCM |
| Wuwei         | WWZ10    | 5318635   | (E)-9-Isopropyl-6-Methyl-5,9-Decadiene-2-One | ADORA1 | BATMAN-TCM |
| Wuwei         | WWZ54    | 1268142   | Nootkatone                                   | ADORA1 | BATMAN-TCM |
| Wuwei         | WWZ39    | 5318039   | Hexahydrocurcumin                            | ADRA2A | BATMAN-TCM |
| Wuwei         | WWZ58    | 561514    | Phenylpropyl Alcohol                         | ADRA2A | BATMAN-TCM |
| Wuwei         | WWZ30    | 5317082   | Epiguaipyridine                              | ADRA2A | BATMAN-TCM |
| Wuwei         | WWZ2     | 20740     | 3-Phenyldecane                               | ADRA2A | BATMAN-TCM |

|         |       |           |                                              |        |            |
|---------|-------|-----------|----------------------------------------------|--------|------------|
| Wuweizi | WWZ57 | 7678      | Phenyl-2-Propanone                           | ADRA2A | BATMAN-TCM |
| Wuweizi | WWZ2  | 20740     | 3-Phenyldecane                               | ADRA2B | BATMAN-TCM |
| Wuweizi | WWZ58 | 561514    | Phenylpropyl Alcohol                         | ADRA2B | BATMAN-TCM |
| Wuweizi | WWZ30 | 5317082   | Epiguaipyridine                              | ADRA2B | BATMAN-TCM |
| Wuweizi | WWZ57 | 7678      | Phenyl-2-Propanone                           | ADRA2B | BATMAN-TCM |
| Wuweizi | WWZ58 | 561514    | Phenylpropyl Alcohol                         | ADRA2C | BATMAN-TCM |
| Wuweizi | WWZ2  | 20740     | 3-Phenyldecane                               | ADRA2C | BATMAN-TCM |
| Wuweizi | WWZ57 | 7678      | Phenyl-2-Propanone                           | ADRA2C | BATMAN-TCM |
| Wuweizi | WWZ30 | 5317082   | Epiguaipyridine                              | ADRA2C | BATMAN-TCM |
| Wuweizi | WWZ57 | 7678      | Phenyl-2-Propanone                           | ADRB2  | BATMAN-TCM |
| Wuweizi | WWZ30 | 5317082   | Epiguaipyridine                              | ADRB2  | BATMAN-TCM |
| Wuweizi | WWZ58 | 561514    | Phenylpropyl Alcohol                         | ADRB2  | BATMAN-TCM |
| Wuweizi | WWZ2  | 20740     | 3-Phenyldecane                               | ADRB2  | BATMAN-TCM |
| Wuweizi | WWZ54 | 1268142   | Nootkatone                                   | ANXA1  | BATMAN-TCM |
| Wuweizi | WWZ48 | 12305725  | Longispinogenin                              | ANXA1  | BATMAN-TCM |
| Wuweizi | WWZ50 | 3084282   | Myricadiol                                   | ANXA1  | BATMAN-TCM |
| Wuweizi | WWZ15 | 5281433   | Chamissonin Diacetate                        | CHRM2  | BATMAN-TCM |
| Wuweizi | WWZ47 | MOL004624 | Longikaurin A                                | CHRM2  | TCMSP      |
| Wuweizi | WWZ54 | 1268142   | Nootkatone                                   | CX3CR1 | BATMAN-TCM |
| Wuweizi | WWZ10 | 5318635   | (E)-9-Isopropyl-6-Methyl-5,9-Decadiene-2-One | CX3CR1 | BATMAN-TCM |
| Wuweizi | WWZ42 | 440185    | Isolychnose                                  | CXCR4  | BATMAN-TCM |
| Wuweizi | WWZ58 | 561514    | Phenylpropyl Alcohol                         | DRD2   | BATMAN-TCM |
| Wuweizi | WWZ39 | 5318039   | Hexahydrocurcumin                            | DRD2   | BATMAN-TCM |
| Wuweizi | WWZ57 | 7678      | Phenyl-2-Propanone                           | DRD2   | BATMAN-TCM |
| Wuweizi | WWZ2  | 20740     | 3-Phenyldecane                               | DRD2   | BATMAN-TCM |
| Wuweizi | WWZ39 | 5318039   | Hexahydrocurcumin                            | DRD3   | BATMAN-TCM |
| Wuweizi | WWZ39 | 5318039   | Hexahydrocurcumin                            | DRD4   | BATMAN-TCM |
| Wuweizi | WWZ2  | 20740     | 3-Phenyldecane                               | F2     | BATMAN-TCM |
| Wuweizi | WWZ56 | 7463      | P-Cymene                                     | F2     | BATMAN-TCM |

|         |       |          |                                              |        |            |
|---------|-------|----------|----------------------------------------------|--------|------------|
| Wuweizi | WWZ23 | 86895    | Cuparene                                     | F2     | BATMAN-TCM |
| Wuweizi | WWZ27 | 98914    | Deoxyshikonin                                | F2     | BATMAN-TCM |
| Wuweizi | WWZ54 | 1268142  | Nootkatone                                   | OPRK1  | BATMAN-TCM |
| Wuweizi | WWZ65 | 5284607  | Vitamin K1                                   | OPRK1  | BATMAN-TCM |
| Wuweizi | WWZ5  | 22311    | Alpha-Limonene                               | OPRK1  | BATMAN-TCM |
| Wuweizi | WWZ36 | 5319725  | 1-Methyl-4-Methylethenylcyclohexene          | OPRK1  | BATMAN-TCM |
| Wuweizi | WWZ10 | 5318635  | (E)-9-Isopropyl-6-Methyl-5,9-Decadiene-2-One | OPRK1  | BATMAN-TCM |
| Wuweizi | WWZ41 | 11127402 | Isolongifolene                               | OPRK1  | BATMAN-TCM |
| Wuweizi | WWZ7  | 10104370 | Beta-Bisabolene                              | OPRK1  | BATMAN-TCM |
| Wuweizi | WWZ8  | 442353   | Beta-Chamigrene                              | OPRK1  | BATMAN-TCM |
| Wuweizi | WWZ28 | 440917   | D-Limonene                                   | OPRK1  | BATMAN-TCM |
| Wuweizi | WWZ24 | 81722    | Delta-Terpineol                              | OPRK1  | BATMAN-TCM |
| Wuweizi | WWZ10 | 5318635  | (E)-9-Isopropyl-6-Methyl-5,9-Decadiene-2-One | PIK3CA | BATMAN-TCM |
| Wuweizi | WWZ54 | 1268142  | Nootkatone                                   | PIK3CA | BATMAN-TCM |
| Wuweizi | WWZ54 | 1268142  | Nootkatone                                   | PIK3R1 | BATMAN-TCM |
| Wuweizi | WWZ10 | 5318635  | (E)-9-Isopropyl-6-Methyl-5,9-Decadiene-2-One | PIK3R1 | BATMAN-TCM |
| Wuweizi | WWZ22 | 5497182  | Clupanodonic Acid                            | PTGER3 | BATMAN-TCM |
| Wuweizi | WWZ2  | 20740    | 3-Phenyldecane                               | S1PR5  | BATMAN-TCM |
| Wuweizi | WWZ4  | 5316200  | Alpha-Cuparenol                              | S1PR5  | BATMAN-TCM |
| Wuweizi | WWZ23 | 86895    | Cuparene                                     | S1PR5  | BATMAN-TCM |
| Wuweizi | WWZ3  | 327096   | 4-Phenylbicyclo[2.2.2]Octan-1-ol             | S1PR5  | BATMAN-TCM |

Table S5 LC-MS Analysis of All

| ID         | name                    | mz         | rt      | exact_ma |         | formula   | KEGG   | type                  | library   | identif<br>y.pvalu | posne<br>g | lev<br>el | 引火汤        |
|------------|-------------------------|------------|---------|----------|---------|-----------|--------|-----------------------|-----------|--------------------|------------|-----------|------------|
|            |                         |            |         | ss       | ppm     |           |        |                       |           |                    |            |           |            |
| M203T461_2 | (-)-alpha-Curcumene     | 203.179306 | 460.537 | 202.1722 | 0.4632  | C15H22    | C09649 | [M+H] <sup>+</sup>    | BioDeepDB | 0.75582            | pos        | 1         | 5559625.42 |
| M247T449   | (-)-Apparicine          | 247.154303 | 448.978 | 264.1626 | 3.49321 | C18H20N2  | C09036 | [M+H-20] <sup>+</sup> | GNPS      | 0.99395            | pos        | 1         | 2254008.02 |
| M372T735   | (-)-Arctigenin          | 372.159182 | 734.901 | 372.1573 | 5.0563  | C21H24O6  | C10545 | [M] <sup>-</sup>      | MoNA      | 0.05748            | neg        | 2         | 216412.523 |
| M137T838   | (-)-beta-Pinene         | 137.132587 | 837.524 | 136.1252 | 0.63738 | C10H16    | C06307 | [M+H] <sup>+</sup>    | BioDeepDB | 0.58312            | pos        | 1         | 8189004.23 |
| M307T212   | Epigallocatechin        | 307.081941 | 212.448 | 306.074  | 2.16514 | C15H14O7  | C12136 | [M+H] <sup>+</sup>    | BioDeepDB | 0.62411            | pos        | 1         | 18103129.1 |
| M585T411_1 | (-)-Guttiferone E       | 585.36706  | 410.542 | 602.3607 | 23.5655 | C38H50O6  | C09929 | [M+H-20] <sup>+</sup> | BioDeepDB | 0.99866            | pos        | 1         | 3046426.42 |
| M131T64    | (-)-Isopiperitenone     | 131.089242 | 64.0412 | 150.1045 | 23.8901 | C10H14O   | C02485 | [M-20-H] <sup>-</sup> | MetaDNA   | 0.02389            | neg        | 2         | 2161622.69 |
| M191T51    | (-)-Jasmonic acid       | 191.107809 | 50.6021 | 210.1256 | 3.13297 | C12H18O3  | C08491 | [M-20-H] <sup>-</sup> | mzCloud   | 0.61376            | neg        | 1         | 98162.0564 |
| M282T713   | (-)-Quebrachamine       | 282.205361 | 713.464 | 282.2096 | 15.0222 | C19H26N2  | C09235 | [M] <sup>+</sup>      | GNPS      | 0.82346            | pos        | 1         | 19651528.3 |
| M393T523   | (-)-Tylocrebrine        | 393.193745 | 523.055 | 393.194  | 0.64813 | C24H27N04 | C10620 | [M] <sup>-</sup>      | BioDeepDB | 0.98659            | neg        | 1         | 3780922.36 |
| M373T750   | (-)-Wikstromol          | 373.132112 | 750.298 | 374.1366 | 7.47271 | C20H22O7  | C10725 | [M-H] <sup>-</sup>    | MoNA      | 0.71742            | neg        | 1         | 12369359.2 |
| M151T456   | (+)-(S)-Carvone         | 151.111547 | 456.126 | 150.1045 | 1.51697 | C10H14O   | C11383 | [M+H] <sup>+</sup>    | mzCloud   | 0.59744            | pos        | 1         | 15969102.9 |
| M205T795   | (+)-1(10),4-Cadinadiene | 205.194573 | 795.165 | 204.1878 | 2.44967 | C15H24    | C06394 | [M+H] <sup>+</sup>    | BioDeepDB | 0.12133            | pos        | 2         | 13160569.4 |
| M137T814   | (+)-a-Pinene            | 137.132582 | 814.095 | 136.1252 | 0.59441 | C10H16    | C09880 | [M+H] <sup>+</sup>    | BioDeepDB | 0.59898            | pos        | 1         | 12646695.2 |
| M381T433   | (+)-Aschantin           | 381.130843 | 433.06  | 400.1522 | 7.78436 | C22H24O7  | C17845 | [M-20-H] <sup>-</sup> | MoNA      | 0.99888            | neg        | 1         | 1238471.85 |
| M595T685_1 | (+)-Bebeerine           | 595.279461 | 684.985 | 594.273  | 1.369   | C36H38N2O | C09352 | [M+H] <sup>+</sup>    | BioDeepDB | 0.98884            | pos        | 1         | 32339870.7 |
| M314T157   | (+)-Borneyl diphosphate | 314.071932 | 156.582 | 314.0684 | 11.2462 | C10H20O7P | C03190 | [M] <sup>-</sup>      | MetaDNA   | 0.00826            | neg        | 2         | 44319994.1 |

|          |                                         |            |         |          |         |                       |        |                        |           |         |       |   |            |
|----------|-----------------------------------------|------------|---------|----------|---------|-----------------------|--------|------------------------|-----------|---------|-------|---|------------|
| M153T474 | (+)-Camphor                             | 153.127368 | 473.597 | 152.1201 | 0.0502  | C10H16O               | C00808 | [M+H] <sup>+</sup>     | mzCloud   | 0.57688 | pos   | 1 | 39747534.1 |
| M367T234 | (+)-Eudesmin                            | 367.145619 | 233.519 | 386.1729 | 24.2168 | C22H26O6              | C10561 | [M-H2O-H] <sup>-</sup> | GNPS      |         | 1 neg | 1 | 281411.416 |
| M152T371 | (+)-Norephedrine<br>(+)-                | 152.10672  | 370.777 | 151.0997 | 1.68248 | C9H13NO               | C02343 | [M+H] <sup>+</sup>     | mzCloud   | 0.60019 | pos   | 1 | 11761913.8 |
| M417T661 | Syringaresinol<br>(<U+00C2><U+00B1      | 417.154085 | 661.453 | 418.1628 | 3.45021 | C22H26O8<br>C17H12C12 | C10889 | [M-H] <sup>-</sup>     | mzCloud   | 0.70277 | neg   | 1 | 1415268.39 |
| M329T654 | >)-Fenarimol<br>(2-                     | 329.027597 | 653.835 | 330.0327 | 6.60417 | N2O                   | C11226 | [M-H] <sup>-</sup>     | BioDeepDB | 0.78758 | neg   | 1 | 1340581.66 |
| M202T426 | Naphthalenyloxy)<br>(2E, 4Z, 7Z, 8E)-   | 202.067374 | 425.909 | 202.063  | 21.6457 | C12H10O3              | C18750 | [M] <sup>+</sup>       | MoNA      | 0.99695 | pos   | 1 | 1388921.48 |
| M275T832 | Colnelenic acid<br>(2E)-Decenoyl-       | 275.199371 | 831.709 | 292.2038 | 10.9179 | C18H28O3              | C16320 | [M+H-H2O] <sup>+</sup> | MetaDNA   | 0.00062 | pos   | 2 | 20767073.6 |
| M128T131 | ACP<br>(2R, 3R)-2, 3-                   | 128.070091 | 131.207 | 129.079  | 12.5631 | C6H11NO2              | C03969 | [M-H] <sup>-</sup>     | BioDeepDB | 0.77219 | neg   | 1 | 4006922.77 |
| M91T65   | Butanediol<br>(2S)-5, 7-                | 91.0272319 | 64.6213 | 90.0681  | 7.2323  | C4H10O2               | C03044 | [M+H] <sup>+</sup>     | BioDeepDB | 9.6E-07 | pos   | 2 | 21459649.3 |
| M300T339 | Dihydroxy-2-(4-<br>(2S)-                | 300.108273 | 339.085 | 300.0998 | 28.3209 | C17H16O5              | C09734 | [M] <sup>+</sup>       | OTCML     |         | 1 pos | 1 | 3562162.69 |
| M255T723 | Liquiritigenin<br>(3R)-beta-            | 255.070018 | 722.604 | 256.0736 | 5.69932 | C15H12O4              | C09762 | [M-H] <sup>-</sup>     | BioDeepDB | 1.9E-22 | neg   | 2 | 30478493.9 |
| M130T182 | Leucine<br>(4Z, 7Z, 10Z, 13Z, 1         | 130.084676 | 182.156 | 131.0946 | 20.359  | C6H13NO2              | C02486 | [M-H] <sup>-</sup>     | mzCloud   | 0.00134 | neg   | 2 | 137140212  |
| M339T449 | 6Z, 19Z)-<br>(5-L-Glutamyl)-            | 339.264856 | 448.978 | 356.2715 | 2.32763 | C24H36O2<br>C10H16N2O | C16185 | [M+H-H2O] <sup>+</sup> | mzCloud   | 0.61887 | pos   | 1 | 8046107.53 |
| M259T237 | L-glutamate<br>(5Z, 9E, 14Z)-           | 259.091365 | 237.171 | 276.0958 | 11.5769 | 7                     | C05282 | [M+H-H2O] <sup>+</sup> | mzCloud   | 1.8E-10 | pos   | 2 | 42756179.6 |
| M335T813 | (8xi, 11R, 12S)-<br>(7Z, 10Z, 13Z, 16Z, | 335.225143 | 812.68  | 336.2301 | 6.91775 | C20H32O4              | C04849 | [M-H] <sup>-</sup>     | BioDeepDB | 0.66177 | neg   | 1 | 6299958.47 |
| M330T805 | 19Z)-<br>(E, E)-                        | 330.251035 | 805.145 | 330.2559 | 14.6719 | C22H34O2              | C16513 | [M] <sup>-</sup>       | mzCloud   | 0.7357  | neg   | 1 | 13814778.8 |
| M271T712 | Trichostachine<br>(E)-3-(4-             | 271.116301 | 711.984 | 271.1208 | 16.5929 | C16H17NO3             | C10174 | [M] <sup>+</sup>       | GNPS      | 0.83839 | pos   | 1 | 2251607.27 |
| M147T362 | Hydroxyphenyl)-                         | 147.04354  | 362.384 | 148.0524 | 10.7739 | C9H8O2                | C05608 | [M-H] <sup>-</sup>     | BioDeepDB | 0.11291 | neg   | 2 | 1292278.59 |
| M129T446 | (E)-Glutaconate                         | 129.018124 | 445.522 | 130.0266 | 9.30236 | C5H6O4                | C02214 | [M-H] <sup>-</sup>     | mzCloud   | 0.83159 | neg   | 1 | 10417816.3 |

|          |                                  |            |         |          |         |           |        |                        |           |         |     |   |            |
|----------|----------------------------------|------------|---------|----------|---------|-----------|--------|------------------------|-----------|---------|-----|---|------------|
| M223T237 | (E)-<br>Monocrotophos<br>(R, S)- | 223.059972 | 237.171 | 223.061  | 4.6077  | C7H14N05P | C18663 | [M] <sup>+</sup>       | MoNA      | 0.66749 | pos | 1 | 30223316.5 |
| M288T398 | Norlaudanosoline<br>(R)-3-       | 288.123841 | 397.878 | 287.1158 | 2.65667 | C16H17N04 | C06350 | [M+H] <sup>+</sup>     | MoNA      | 0.91955 | pos | 1 | 17777388.5 |
| M87T248  | Hydroxybutyric                   | 87.0440667 | 247.692 | 104.0473 | 4.47846 | C4H8O3    | C01089 | [M+H-H2O] <sup>+</sup> | BioDeepDB | 2.5E-09 | pos | 2 | 95028281.7 |
| M136T403 | (R)-Amphetamine                  | 136.11182  | 403.447 | 135.1048 | 1.87437 | C9H13N    | C07514 | [M+H] <sup>+</sup>     | GNPS      | 6.2E-07 | pos | 2 | 3615260.61 |
| M326T446 | (R)-Laudanidine<br>(R)-mandelic  | 326.171831 | 445.984 | 343.1784 | 2.65332 | C20H25N04 | C17592 | [M+H-H2O] <sup>+</sup> | MoNA      | 0.8937  | pos | 1 | 4305095.8  |
| M153T534 | Acid                             | 153.054748 | 533.958 | 152.0473 | 1.12067 | C8H8O3    | C01983 | [M+H] <sup>+</sup>     | MetaDNA   | 0.00015 | pos | 2 | 80896133.4 |
| M129T149 | (R)-Mevalonate                   | 129.054257 | 148.981 | 148.0736 | 7.38574 | C6H12O4   | C00418 | [M-H2O-H] <sup>-</sup> | mzCloud   | 0.66526 | neg | 1 | 19214954.5 |
| M131T820 | (R)-Pantolactone                 | 130.521908 | 819.78  | 130.063  | 0.65799 | C6H10O3   | C01012 | [M+H] <sup>+</sup>     | BioDeepDB | 0.58405 | pos | 1 | 115461160  |
| M180T430 | (R)-Salsolinol                   | 180.101932 | 430.131 | 179.0946 | 0.14946 | C10H13N02 | C09642 | [M+H] <sup>+</sup>     | MoNA      | 0.60419 | pos | 1 | 11920613.1 |
| M178T171 | (R)C(S)S-Alliin<br>(S, E)-       | 178.052388 | 170.665 | 177.046  | 4.78521 | C6H11N03S | C08265 | [M+H] <sup>+</sup>     | MoNA      | 0.66084 | pos | 1 | 4004403.91 |
| M299T715 | Zearalenone<br>(S)-[10]-         | 299.131337 | 714.841 | 318.1467 | 10.1188 | C18H22O5  | C09981 | [M-H2O-H] <sup>-</sup> | BioDeepDB | 0.77456 | neg | 1 | 169746.972 |
| M351T811 | Gingerol<br>(S)-1-               | 351.251032 | 811.413 | 350.2457 | 5.53431 | C21H34O4  | C17496 | [M+H] <sup>+</sup>     | MoNA      | 0.64903 | pos | 1 | 5036620.58 |
| M123T75  | Phenylethanol                    | 123.039808 | 74.9588 | 122.0732 | 4.96812 | C8H10O    | C11348 | [M+H] <sup>+</sup>     | BioDeepDB | 0.62223 | pos | 1 | 4747819439 |
| M131T136 | (S)-2-                           |            |         |          |         |           |        |                        |           |         |     |   |            |
| _2       | Acetolactate<br>(S)-2-           | 131.034044 | 135.795 | 132.0423 | 7.4791  | C5H8O4    | C06010 | [M-H] <sup>-</sup>     | MetaDNA   | 0.0003  | neg | 2 | 64754443.3 |
| M129T385 | Methylmalate<br>(S)-2-           | 129.018163 | 385.225 | 148.0372 | 5.01242 | C5H8O5    | C02614 | [M-H2O-H] <sup>-</sup> | MetaDNA   | 0.00951 | neg | 2 | 9133190.14 |
| M128T365 | Propylpiperidine<br>(S)-2,3-     | 128.142898 | 365.061 | 127.1361 | 3.72816 | C8H17N    | C06523 | [M+H] <sup>+</sup>     | BioDeepDB | 0.94374 | pos | 1 | 6353898.69 |
| M409T698 | Epoxyqualene<br>(S)-3-Methyl-2-  | 409.385391 | 697.952 | 426.3862 | 16.1832 | C30H50O   | C01054 | [M+H-H2O] <sup>+</sup> | BioDeepDB | 5.1E-10 | pos | 2 | 28705584.4 |
| M129T826 | oxopentanoic<br>(S)-Abscisic     | 129.053926 | 826.333 | 130.063  | 13.9339 | C6H10O3   | C00671 | [M-H] <sup>-</sup>     | MetaDNA   | 0.01251 | neg | 2 | 14354114.6 |
| M265T472 | acid                             | 265.142511 | 472.132 | 264.1362 | 3.35201 | C15H20O4  | C06082 | [M+H] <sup>+</sup>     | BioDeepDB | 8.4E-05 | pos | 2 | 15409920.6 |





|                      |                                                             |            |         |          |         |                              |        |                        |           |         |       |   |            |
|----------------------|-------------------------------------------------------------|------------|---------|----------|---------|------------------------------|--------|------------------------|-----------|---------|-------|---|------------|
| M170T32              | 1-<br>Methylhistidine                                       | 170.095799 | 32.4171 | 169.0851 | 20.1251 | C7H11N3O2                    | C01152 | [M+H] <sup>+</sup>     | BioDeepDB | 0.0003  | pos   | 2 | 5108766.34 |
| M137T306             | 1-<br>Methylnicotinami<br>1-Methyluric                      | 137.070656 | 306.247 | 137.0715 | 1.7773  | C7H9N2O                      | C02918 | [M+H] <sup>+</sup>     | BioDeepDB | 2.7E-08 | pos   | 2 | 5429178.9  |
| M182T556             | acid                                                        | 182.044646 | 555.524 | 182.044  | 3.55088 | C6H6N4O3                     | C16359 | [M] <sup>-</sup>       | BioDeepDB | 0.83019 | neg   | 1 | 1415134.71 |
| M165T94              | 1-Methylxanthine                                            | 165.039604 | 94.1615 | 166.0491 | 13.4517 | C6H6N4O2                     | C16358 | [M-H] <sup>-</sup>     | mzCloud   | 0.01991 | neg   | 2 | 56484957.8 |
| M185T106<br>_2       | 1-<br>Naphthaleneaceti                                      | 185.063936 | 105.537 | 186.0681 | 16.8182 | C12H10O2                     | C13014 | [M-H] <sup>-</sup>     | MoNA      |         | 1 neg | 1 | 3271366.22 |
| M145T777             | 1-Naphthol                                                  | 145.067011 | 777.245 | 144.0575 | 15.2383 | C10H8O                       | C11714 | [M+H] <sup>+</sup>     | BioDeepDB | 0.77197 | pos   | 1 | 6716729.87 |
| M339T608             | 1-O-Feruloyl-<br>beta-D-glucose                             | 339.106451 | 608.261 | 356.1107 | 9.39271 | C16H20O9                     | C17759 | [M+H-H2O] <sup>+</sup> | MetaDNA   | 0.01233 | pos   | 2 | 9986039.24 |
| M313T398             | 1-O-Galloyl-<br>beta-D-glucose                              | 313.055444 | 397.585 | 332.0743 | 1.48735 | C13H16O10                    | C01158 | [M-H2O-H] <sup>-</sup> | MoNA      | 0.98918 | neg   | 1 | 864758.891 |
| M329T137<br>M409T537 | 1-O-Vanilloyl-<br>beta-D-glucose                            | 329.087141 | 137.226 | 330.0951 | 2.07501 | C14H18O9                     | C20470 | [M-H] <sup>-</sup>     | MetaDNA   | 0.01231 | neg   | 2 | 16204832.2 |
| M663T521             | 1-Octacosanol                                               | 409.451163 | 537.051 | 410.4488 | 23.5405 | C28H58O                      | C08387 | [M-H] <sup>-</sup>     | MoNA      | 0.98028 | neg   | 1 | 99858.4285 |
| M496T802             | 1-Palmitoyl-2-<br>(5-keto-6-<br>1-                          | 663.36212  | 520.739 | 663.3747 | 18.9633 | C32H58N01<br>1P<br>C24H51N07 | C13900 | [M] <sup>+</sup>       | BioDeepDB |         | 1 pos | 1 | 11996178.5 |
| M114T178             | 1-<br>palmitoylglycero<br>1-Pyrroline-5-<br>carboxylic acid | 496.327663 | 801.685 | 496.3403 | 24.4532 | P                            | C04102 | [M+H] <sup>+</sup>     | BioDeepDB | 4.6E-08 | pos   | 2 | 25771499.4 |
| M129T504             | 1,1-<br>Dimethylbiguanid                                    | 129.101854 | 504.466 | 129.1014 | 3.51918 | C4H11N5                      | C07151 | [M] <sup>+</sup>       | MoNA      | 0.6184  | pos   | 1 | 2586257.5  |
| M113T784             | 1,2-<br>Cyclohexanedione                                    | 113.059248 | 783.78  | 112.0524 | 3.79002 | C6H8O2                       | C06105 | [M+H] <sup>+</sup>     | MoNA      | 0.65269 | pos   | 1 | 106963711  |
| M162T346             | 1,2-Epoxy-p-<br>Dihydronaphthale                            | 162.065709 | 345.761 | 162.0681 | 14.7543 | C10H10O2                     | C06205 | [M] <sup>-</sup>       | MoNA      | 0.81858 | neg   | 1 | 1759273.37 |
| M153T268             | 1,2-<br>menth-8-ene                                         | 153.127039 | 268.427 | 152.1201 | 2.20255 | C10H16O                      | C07271 | [M+H] <sup>+</sup>     | BioDeepDB | 2E-05   | pos   | 2 | 88609972.2 |
| M111T276             | 1,3-Benediol<br>1,3,7-                                      | 111.043872 | 276.414 | 110.0368 | 1.83768 | C6H6O2                       | C01751 | [M+H] <sup>+</sup>     | BioDeepDB | 0.62868 | pos   | 1 | 88155563.6 |
| M210T398             | 1,3-<br>Trimethyluric                                       | 210.075864 | 397.585 | 210.0753 | 2.68667 | C8H10N4O3                    | C16361 | [M] <sup>-</sup>       | mzCloud   | 0.60183 | neg   | 1 | 5982794.77 |

|            |                             |            |         |          |         |           |        |                        |           |         |       |   |            |
|------------|-----------------------------|------------|---------|----------|---------|-----------|--------|------------------------|-----------|---------|-------|---|------------|
| M167T484   | 1,4-Dimethyl-7-ethylazulene | 167.117601 | 483.973 | 184.1252 | 0.98646 | C14H16    | C09633 | [M+H-2H] <sup>+</sup>  | BioDeepDB | 0.85112 | pos   | 1 | 5126930.01 |
| M159T652   | 1,4-Naphthoquinone          | 159.028368 | 651.956 | 158.0368 | 16.5495 | C10H6O2   | C02617 | [M+H] <sup>+</sup>     | OTCML     |         | 1 pos | 1 | 9659857.85 |
| M164T343   | 1,5-Anhydrosorbitol         | 164.070728 | 342.819 | 164.0685 | 13.5808 | C6H12O5   | C07326 | [M] <sup>-</sup>       | MoNA      | 0.04046 | neg   | 2 | 18479033.2 |
| M159T185   | 1,7-Naphthalenediamine      | 159.095044 | 185.398 | 158.0844 | 21.1682 | C10H10N2  | C19463 | [M+H] <sup>+</sup>     | mzCloud   | 0.93581 | pos   | 1 | 300077061  |
| M177T835_2 | 1,7-Dimethyluric acid       | 177.039694 | 835.329 | 196.0596 | 8.56501 | C7H8N4O3  | C16356 | [M-2H0-H] <sup>-</sup> | MoNA      | 0.66033 | neg   | 1 | 6955599.82 |
| M298T220   | 1,8-ANS                     | 298.055667 | 219.979 | 299.0616 | 4.50599 | S         | C11326 | [M-H] <sup>-</sup>     | mzCloud   | 0.70619 | neg   | 1 | 950654.47  |
| M365T651   | 10-Hydroxycamptothecin      | 365.1044   | 650.898 | 364.1059 | 24.0962 | 5         | C17939 | [M+H] <sup>+</sup>     | OTCML     | 1.2E-05 | pos   | 2 | 269628384  |
| M254T321_1 | 10-Hydroxycarbapenem        | 254.112432 | 321.198 | 254.1055 | 27.279  | 2         | C07493 | [M] <sup>+</sup>       | MoNA      | 0.04528 | pos   | 2 | 15917089.5 |
| M187T612   | 10-Hydroxydecanoic acid     | 187.132072 | 612.3   | 188.1412 | 5.56964 | C10H20O3  | C02774 | [M-H] <sup>-</sup>     | BioDeepDB | 0.05336 | neg   | 2 | 11657294.8 |
| M306T715   | 10-Nitrolinoleic acid       | 306.206406 | 714.841 | 325.2253 | 1.64691 | C18H31N04 | C13800 | [M-2H0-H] <sup>-</sup> | mzCloud   | 3.6E-14 | neg   | 2 | 7319598.82 |
| M271T290   | 11-Dihydroxycarbama         | 271.110074 | 289.912 | 270.1004 | 8.69033 | 3         | C07495 | [M+H] <sup>+</sup>     | MoNA      | 0.70888 | pos   | 1 | 3416885.26 |
| M202T175   | 11-Aminoundecanoic acid     | 202.179179 | 174.865 | 201.1729 | 4.82724 | C11H23N02 | C19325 | [M+H] <sup>+</sup>     | MoNA      | 0.99615 | pos   | 1 | 266119327  |
| M349T805   | 11-thromboxane B2           | 349.194941 | 805.145 | 368.2199 | 18.812  | C20H32O6  | C05964 | [M-2H0-H] <sup>-</sup> | BioDeepDB | 0.77982 | neg   | 1 | 3100106.63 |
| M325T813   | 11-Dehydrocorticosterone    | 325.184344 | 812.68  | 344.1988 | 12.0989 | C21H28O4  | C05490 | [M-2H0-H] <sup>-</sup> | BioDeepDB | 0.00781 | neg   | 2 | 20683819.6 |
| M354T705_1 | 11-epi-Prostaglandin        | 354.230534 | 704.715 | 354.2406 | 28.4153 | C20H34O5  | C05959 | [M] <sup>+</sup>       | mzCloud   | 0.95569 | pos   | 1 | 79833612.4 |
| M443T736   | 11alpha-Hydroxy-beta-amyrin | 443.387707 | 735.7   | 442.3811 | 1.50789 | C30H50O2  | C19942 | [M+H] <sup>+</sup>     | MetaDNA   | 0.00986 | pos   | 2 | 27070181.1 |
| M215T730   | 12-Hydroxydodecanoic acid   | 215.164124 | 730.264 | 216.1725 | 2.19442 | C12H24O3  | C08317 | [M-H] <sup>-</sup>     | BioDeepDB | 9E-12   | neg   | 2 | 5934723.74 |
| M318T499   | 12-KETE                     | 318.226443 | 498.645 | 318.2195 | 21.8193 | C20H30O3  | C14807 | [M] <sup>+</sup>       | BioDeepDB | 0.98688 | pos   | 1 | 4327785.7  |
| M333T795   | 12-Keto-leukotriene B4      | 333.206616 | 794.753 | 334.2144 | 1.45322 | C20H30O4  | C05949 | [M-H] <sup>-</sup>     | BioDeepDB | 0.62111 | neg   | 1 | 1593792.24 |

|          |                                           |            |         |          |         |           |        |            |           |         |     |   |            |
|----------|-------------------------------------------|------------|---------|----------|---------|-----------|--------|------------|-----------|---------|-----|---|------------|
| M319T787 | 12-Keto-<br>tetrahydro-                   | 319.22853  | 786.569 | 336.2301 | 3.85214 | C20H32O4  | C02165 | [M+H2O]+   | BioDeepDB | 0.65119 | pos | 1 | 10269066.1 |
| M293T756 | 12-OPDA                                   | 293.209536 | 755.537 | 292.2038 | 5.25381 | C18H28O3  | C01226 | [M+H]+     | BioDeepDB | 0.99671 | pos | 1 | 14521086   |
| M315T800 | 12,13-DHOME<br>13-L-                      | 315.251374 | 800.484 | 314.2457 | 5.08195 | C18H34O4  | C14829 | [M+H]+     | mzCloud   | 0.63244 | pos | 1 | 11649188   |
| M295T737 | Hydroperoxylinol                          | 295.225104 | 737.198 | 312.2301 | 7.43945 | C18H32O4  | C04717 | [M+H2O]+   | BioDeepDB | 3.5E-11 | pos | 2 | 28408111.4 |
| M275T817 | 13-OxoODE<br>13,14-Dihydro-               | 275.199825 | 817.214 | 294.2195 | 4.67092 | C18H30O3  | C14765 | [M-H2O-H]- | GNPS      | 0.63611 | neg | 1 | 934483.632 |
| M333T816 | 15-keto-PGE2                              | 333.206265 | 815.664 | 352.225  | 1.03617 | C20H32O5  | C04671 | [M-H2O-H]- | BioDeepDB | 0.60206 | neg | 1 | 1422557.04 |
| M291T837 | 13(S)-HPOT<br>16-                         | 291.195551 | 836.769 | 310.2144 | 1.57649 | C18H30O4  | C04785 | [M-H2O-H]- | mzCloud   | 0.59178 | neg | 1 | 11546854.1 |
| M271T778 | Hydroxypalmitate                          | 271.227877 | 777.92  | 272.2351 | 0.19701 | C16H32O3  | C18218 | [M-H]-     | mzCloud   | 0.61278 | neg | 1 | 4870379.02 |
| M303T748 | 16(R)-HETE<br>16alpha-                    | 303.230842 | 748.486 | 320.2351 | 10.4744 | C20H32O3  | C14778 | [M+H2O]+   | mzCloud   | 0.01619 | pos | 2 | 12798433.5 |
| M267T365 | Hydroxyestrone<br>17-                     | 267.136094 | 365.475 | 286.1569 | 9.04386 | C18H22O3  | C05300 | [M-H2O-H]- | mzCloud   | 0.97422 | neg | 1 | 497810.819 |
| M331T813 | Hydroxyprogester                          | 331.22609  | 812.862 | 330.2195 | 2.0544  | C21H30O3  | C01176 | [M+H]+     | MoNA      | 0.60261 | pos | 1 | 4389555.55 |
| M272T484 | 17a-Estradiol                             | 272.184618 | 483.973 | 272.1776 | 0.98423 | C18H24O2  | C02537 | [M]+       | BioDeepDB | 0.598   | pos | 1 | 4674917.76 |
| M279T374 | 17a-<br>_2                                | 279.169193 | 373.532 | 296.1776 | 3.48392 | C20H24O2  | C07534 | [M+H2O]+   | MoNA      | 0.93822 | pos | 1 | 6097457.01 |
| M332T535 | Ethynylestradiol<br>17a-                  | 332.241716 | 535.329 | 332.2351 | 19.9147 | C21H32O3  | C05138 | [M]+       | BioDeepDB | 0.97119 | pos | 1 | 14582268.3 |
| M312T787 | Hydroxypregnenol<br>17beta-               | 312.222622 | 786.569 | 329.2355 | 17.4366 | C21H31NO2 | C15149 | [M+H2O]+   | MetaDNA   | 0.01422 | pos | 2 | 14312226.5 |
| M345T832 | Acetamidoandrost<br>18-                   | 345.201508 | 831.709 | 362.2093 | 1.03696 | C21H30O5  | C01124 | [M+H2O]+   | BioDeepDB | 0.59082 | pos | 1 | 2708646.15 |
| M303T692 | Hydroxycorticost                          | 303.230545 | 692.461 | 320.2351 | 9.49429 | C20H32O3  | C14749 | [M+H2O]+   | BioDeepDB | 1.5E-09 | pos | 2 | 8320212.06 |
| M99T39   | 19(S)-HETE<br>1H-Imidazole-4-<br>methanol | 99.0552156 | 39.4128 | 98.048   | 0.60948 | C4H6N2O   | C05562 | [M+H]+     | MoNA      | 0.98647 | pos | 1 | 1532480.82 |
| M173T253 | 1H-Indole-3-<br>acetamide                 | 173.008661 | 252.703 | 174.0793 | 8.95932 | C10H10N2O | C02693 | [M-H]-     | BioDeepDB | 0.00023 | neg | 2 | 4939381.87 |

|          |                                   |            |         |          |         |           |        |            |           |         |       |   |            |
|----------|-----------------------------------|------------|---------|----------|---------|-----------|--------|------------|-----------|---------|-------|---|------------|
| M144T416 | 1H-Indole-3-carboxaldehyde-2-     | 144.044108 | 416.128 | 145.0528 | 9.57829 | C9H7NO    | C08493 | [M-H]-     | MoNA      | 2.6E-05 | neg   | 2 | 9005669.5  |
| M204T232 | Acetamidofluoren-2-Amino-2-deoxy- | 204.076739 | 231.973 | 223.0997 | 22.3968 | C15H13NO  | C02778 | [M-H2O-H]- | MoNA      |         | 1 neg | 1 | 2410870.91 |
| M178T95  | D-gluconate-2-Amino-3-            | 178.070334 | 94.7467 | 195.0743 | 19.4765 | C6H13NO6  | C03752 | [M+H2O]+   | BioDeepDB | 1.4E-07 | pos   | 2 | 355188216  |
| M179T746 | methylimidazo[4,2-Amino-3-        | 179.070063 | 745.747 | 198.0905 | 11.4303 | C11H10N4  | C19180 | [M-H2O-H]- | MoNA      | 0.76191 | neg   | 1 | 1573864.22 |
| M169T184 | phosphonopropion-2-Amino-4-       | 169.01382  | 183.708 | 169.014  | 1.06768 | C3H8NO5P  | C05672 | [M]-       | BioDeepDB | 0.614   | neg   | 1 | 1998607.42 |
| M153T389 | nitrotoluene-2-Aminobenzoic acid  | 153.065457 | 389.035 | 152.0586 | 2.73723 | C7H8N2O2  | C16398 | [M+H]+     | mzCloud   | 0.65906 | pos   | 1 | 4528926.83 |
| M137T69  | 2-                                | 136.952965 | 69.2834 | 137.0477 | 1.98749 | C7H7NO2   | C00108 | [M]+       | BioDeepDB | 3.4E-11 | pos   | 2 | 11688161.3 |
| M104T393 | Aminoisobutyric                   | 104.069649 | 392.715 | 103.0633 | 8.90398 | C4H9NO2   | C03665 | [M+H]+     | BioDeepDB | 0.70716 | pos   | 1 | 25606368.7 |
| M110T156 | 2-Aminophenol-2-                  | 110.059366 | 156.393 | 109.0528 | 6.12658 | C6H7NO    | C01987 | [M+H]+     | mzCloud   | 5.6E-05 | pos   | 2 | 565786486  |
| M377T835 | _3                                | 377.269624 | 835.329 | 378.277  | 0.26532 | C23H38O4  | C13856 | [M-H]-     | MoNA      | 0.5812  | neg   | 1 | 152158238  |
| M158T160 | Benzimidazolylgu-2-               | 158.080443 | 160.369 | 175.0858 | 13.1396 | C8H9N5    | C10898 | [M+H2O]+   | MoNA      | 0.99996 | pos   | 1 | 85466675.4 |
| M171T760 | 2-Biphenylol                      | 171.07669  | 759.605 | 170.0732 | 21.6865 | C12H10O   | C02499 | [M+H]+     | BioDeepDB | 0.83932 | pos   | 1 | 6217865.33 |
| M87T165  | 2-Butenoate-2-C-Methyl-D-         | 87.0440046 | 165.217 | 86.0368  | 0.81975 | C4H6O2    | C01771 | [M+H]+     | mzCloud   | 0.63498 | pos   | 1 | 26977519.6 |
| M259T33  | erythritol 2,4-                   | 258.979839 | 32.8715 | 277.9957 | 9.76552 | C5H12O9P2 | C11453 | [M-H2O-H]- | BioDeepDB | 0.99961 | neg   | 1 | 398881.552 |
| M252T299 | 2-Deoxyadenosine-2-               | 252.10752  | 299.493 | 251.102  | 5.18015 | 3         | C00559 | [M+H]+     | BioDeepDB | 9.3E-14 | pos   | 2 | 207094056  |
| M97T703  | Furancarboxaldehy-1               | 97.0286118 | 703.35  | 96.0211  | 2.18246 | C5H4O2    | C14279 | [M+H]+     | BioDeepDB | 0.69843 | pos   | 1 | 22571552.8 |
| M111T75  | 2-Furoate                         | 111.007105 | 74.6705 | 112.016  | 14.587  | C5H4O3    | C01546 | [M-H]-     | mzCloud   | 1.8E-13 | neg   | 2 | 662058448  |
| M114T216 | 2-Heptanone                       | 114.102093 | 216.359 | 114.1045 | 21.0963 | C7H14O    | C08380 | [M]+       | BioDeepDB | 5.5E-06 | pos   | 2 | 47872182.5 |
| M99T703  | 2-Hexenal                         | 99.0807831 | 703.35  | 98.0732  | 3.0994  | C6H10O    | C08497 | [M+H]+     | MoNA      | 0.17335 | pos   | 2 | 34006177   |

|            |                                    |            |         |          |         |           |        |                                     |           |         |     |   |            |
|------------|------------------------------------|------------|---------|----------|---------|-----------|--------|-------------------------------------|-----------|---------|-----|---|------------|
| M329T835   | 2-Hydroxy-6-pentadecylbenzoic acid | 329.247268 | 835.329 | 348.2664 | 2.25271 | C22H36O3  | C10759 | [M-H <sub>2</sub> O-H] <sup>-</sup> | BioDeepDB | 0.59965 | neg | 1 | 4803693.28 |
| M273T634   | 2-hydroxyflutamide                 | 273.045422 | 633.832 | 292.0671 | 12.0404 | C11H11F3N | C14204 | [M-H <sub>2</sub> O-H] <sup>-</sup> | BioDeepDB | 0.86008 | neg | 1 | 813853.3   |
| M131T181   | 2-Hydroxyglutarate                 | 131.033504 | 181.154 | 148.0372 | 28.5294 | C5H8O5    | C02630 | [M+H-H <sub>2</sub> O] <sup>+</sup> | MetaDNA   | 0.0021  | pos | 2 | 4018660.38 |
| M193T500_2 | 2-Hydroxyiminostilbene             | 193.085538 | 500.045 | 209.0841 | 18.7027 | C14H11NO  | C16604 | [M] <sup>+</sup>                    | mzCloud   | 0.52831 | pos | 2 | 9446942.58 |
| M151T449   | 2-Hydroxyphenylacetate             | 151.037718 | 448.527 | 152.0473 | 15.2696 | C8H8O3    | C05852 | [M-H] <sup>-</sup>                  | mzCloud   | 0.21151 | neg | 2 | 6469403.66 |
| M96T119    | 2-Hydroxypyridine                  | 96.0447739 | 119.433 | 95.0371  | 0.26921 | C5H5NO    | C02502 | [M+H] <sup>+</sup>                  | BioDeepDB | 0.00012 | pos | 2 | 234171909  |
| M175T173   | 2-Isopropylmalic acid              | 175.059208 | 173.092 | 176.0685 | 11.3803 | C7H12O5   | C02504 | [M-H] <sup>-</sup>                  | BioDeepDB | 0.00017 | neg | 2 | 79207047.3 |
| M102T35_2  | 2-Ketobutyric acid                 | 102.033334 | 34.5397 | 102.0317 | 8.13492 | C4H6O3    | C00109 | [M] <sup>+</sup>                    | BioDeepDB | 5.4E-05 | pos | 2 | 1198809553 |
| M302T386   | 17beta-estradiol                   | 302.193667 | 386.352 | 302.1882 | 18.0916 | C19H26O3  | C05302 | [M] <sup>+</sup>                    | mzCloud   | 0.42737 | pos | 2 | 21035446.9 |
| M151T503   | 2-Methoxy-4-vinylphenol            | 151.075009 | 503.046 | 150.0681 | 2.29212 | C9H10O2   | C17883 | [M+H] <sup>+</sup>                  | MoNA      | 0.61962 | pos | 1 | 33810975.4 |
| M283T442   | 2-Methoxystropane                  | 283.164518 | 442.005 | 300.1725 | 1.93696 | C19H24O3  | C05299 | [M+H-H <sub>2</sub> O] <sup>+</sup> | mzCloud   | 0.64741 | pos | 1 | 3061878.92 |
| M137T810   | 2-Methylbenzoic acid               | 137.059435 | 810.052 | 136.0524 | 1.7599  | C8H8O2    | C07215 | [M+H] <sup>+</sup>                  | BioDeepDB | 0.61302 | pos | 1 | 33299459.9 |
| M87T295    | 2-Methylbutanal                    | 87.080369  | 295.356 | 86.0732  | 1.22906 | C5H10O    | C02223 | [M+H] <sup>+</sup>                  | BioDeepDB | 0.61223 | pos | 1 | 8289017.29 |
| M88T394    | 2-Methylpropanal                   | 88.0752657 | 393.934 | 87.0684  | 3.44482 | C4H8O     | C03219 | [M+H] <sup>+</sup>                  | BioDeepDB | 4.3E-07 | pos | 2 | 163791118  |
| M93T833    | 2-Methylpyridine                   | 93.0566833 | 833.029 | 93.0578  | 12.0006 | C6H7N     | C14447 | [M] <sup>+</sup>                    | mzCloud   | 0.99991 | pos | 1 | 1874684.94 |
| M182T378_1 | 2-Methylthiobenzotriazole          | 182.011351 | 377.704 | 181.002  | 11.403  | C8H7NS2   | C10910 | [M+H] <sup>+</sup>                  | mzCloud   | 0.98121 | pos | 1 | 2235487.02 |
| M209T56    | 1-Naphthalenesulfonic acid         | 209.027191 | 56.1096 | 208.0194 | 2.46591 | C10H8O3S  | C16202 | [M+H] <sup>+</sup>                  | mzCloud   | 0.78767 | pos | 1 | 2404285.03 |
| M144T458   | 2-Naphthylamine                    | 144.080678 | 457.576 | 143.0735 | 0.67805 | C10H9N    | C02227 | [M+H] <sup>+</sup>                  | mzCloud   | 0.59301 | pos | 1 | 9213313.58 |
| M268T408   | 2-O-(alpha-D-mannosyl)-D-glucose   | 268.082469 | 408.368 | 268.0794 | 11.4475 | C9H16O9   | C11544 | [M] <sup>-</sup>                    | MetaDNA   | 0.01478 | neg | 2 | 3791224.82 |

|           |                                       |            |         |          |         |           |        |                        |           |         |     |   |            |
|-----------|---------------------------------------|------------|---------|----------|---------|-----------|--------|------------------------|-----------|---------|-----|---|------------|
| M174T104  | 2-Oxoarginine<br>2-Oxovaleric<br>acid | 174.08675  | 104.493 | 173.08   | 3.02315 | C6H11N3O3 | C03771 | [M+H] <sup>+</sup>     | MetaDNA   | 0.00013 | pos | 2 | 870594096  |
| M117T342  | Phenylacetamide                       | 117.053961 | 341.802 | 116.0473 | 5.25166 | C5H8O3    | C06255 | [M+H] <sup>+</sup>     | BioDeepDB | 0.7151  | pos | 1 | 23090697.3 |
| M134T324  | 2-Phenylethanol                       | 134.05968  | 324.413 | 135.0684 | 10.769  | C8H9NO    | C02505 | [M-H] <sup>-</sup>     | MetaDNA   | 3.9E-05 | neg | 2 | 746639.357 |
| M105T384  | 2-Pyrrolidinone                       | 105.069589 | 383.536 | 122.0732 | 7.72058 | C8H10O    | C05853 | [M+H-2H] <sup>+</sup>  | BioDeepDB | 0.00029 | pos | 2 | 41660879.3 |
| M100T195  | 2-trans-6-trans-                      | 100.075911 | 195.23  | 99.0684  | 2.10921 | C5H9NO    | C11118 | [M+H] <sup>+</sup>     | BioDeepDB | 0.61579 | pos | 1 | 33394955   |
| M221T669  | Farnesal                              | 221.189627 | 668.867 | 220.1827 | 1.57728 | C15H24O   | C03461 | [M+H] <sup>+</sup>     | BioDeepDB | 7.1E-11 | pos | 2 | 23099270.8 |
| M336T293  | 2,2-Bis(4-hydroxyphenyl)he            | 336.055336 | 292.621 | 336.0585 | 9.4101  | C15H10F6O | C14350 | [M] <sup>-</sup>       | mzCloud   | 0.92512 | neg | 1 | 1468048.48 |
| M155T62   | 2,3-Butanediol                        | 155.069756 | 62.1777 | 154.0122 | 3.19394 | C4H10O2S2 | C00265 | [M+H] <sup>+</sup>     | BioDeepDB | 0.00019 | pos | 2 | 11215865.1 |
| M104T345  | 2,3-Dinor-8-iso                       | 104.057136 | 344.555 | 104.0586 | 14.0721 | C3H8N2O2  | C03401 | [M] <sup>+</sup>       | MoNA      | 0.85346 | pos | 1 | 5830719.64 |
| M326T404  | prostaglandin                         | 326.206827 | 403.698 | 326.2093 | 7.58018 | C18H30O5  | C14794 | [M] <sup>-</sup>       | BioDeepDB | 0.99876 | neg | 1 | 2495773    |
| M139T375  | 2,4-Diaminoaniso                      | 139.086169 | 375.021 | 138.0793 | 2.92886 | C7H10N2O  | C19218 | [M+H] <sup>+</sup>     | mzCloud   | 0.6762  | pos | 1 | 31793020.7 |
| M201T787  | Dichlorophenoxya                      | 200.953853 | 787.078 | 219.9694 | 14.1499 | C8H6Cl2O3 | C03664 | [M-2H0-H] <sup>-</sup> | BioDeepDB | 0.75357 | neg | 1 | 3123337.35 |
| M149T63_2 | 2,4-Dihydroxy-6-methylbenzoic         | 149.023069 | 62.7487 | 168.0423 | 5.3705  | C8H8O4    | C01839 | [M-2H0-H] <sup>-</sup> | OTCML     | 0.90031 | neg | 1 | 2739805.4  |
| M151T598  | Dihydroxyacetoph                      | 151.037621 | 598.341 | 152.0473 | 6.5612  | C8H8O3    | C03663 | [M-H] <sup>-</sup>     | BioDeepDB | 0.00019 | neg | 2 | 26922312.5 |
| M164T68   | Dihydroxypteridi                      | 163.939685 | 68.0903 | 164.0334 | 2.05245 | C6H4N4O2  | C03212 | [M] <sup>+</sup>       | BioDeepDB | 0.02298 | pos | 2 | 4066596.15 |
| M183T472  | Dinitrophenol                         | 183.003562 | 471.768 | 184.012  | 6.34694 | C6H4N2O5  | C02496 | [M-H] <sup>-</sup>     | mzCloud   | 0.63564 | neg | 1 | 1260080.47 |
| M215T542  | 2,4-DP                                | 214.966154 | 541.673 | 233.9851 | 2.58427 | C9H8Cl2O3 | C11020 | [M-2H0-H] <sup>-</sup> | MoNA      | 0.99203 | neg | 1 | 288404.181 |
| M434T180  | 2,4,4,6-Tetrahydroxychal              | 434.110567 | 179.75  | 434.1213 | 24.7236 | C21H22O10 | C16407 | [M] <sup>+</sup>       | MetaDNA   | 0.20476 | pos | 2 | 125112171  |
| M196T77   | Trichlorophenol                       | 195.925775 | 77.2263 | 195.9249 | 4.22004 | C6H3Cl3O  | C07101 | [M] <sup>-</sup>       | mzCloud   | 0.99524 | neg | 1 | 31835484.7 |

|          |                                        |            |         |          |         |                          |        |                        |           |         |     |   |            |
|----------|----------------------------------------|------------|---------|----------|---------|--------------------------|--------|------------------------|-----------|---------|-----|---|------------|
| M189T753 | 2,6-Dichlorobenzamid<br>2,6-Dimethoxy- | 188.977539 | 752.541 | 188.9748 | 14.4944 | C7H5C12NO                | C10934 | [M] <sup>+</sup>       | MoNA      | 0.99999 | pos | 1 | 4196095.17 |
| M169T291 | 1,4-benzoquinone<br>2,6-               | 169.048823 | 291.307 | 168.0423 | 4.21228 | C8H8O4                   | C10331 | [M+H] <sup>+</sup>     | MoNA      | 0.66397 | pos | 1 | 17915779.7 |
| M155T497 | Dimethoxyphenol<br>2'-O-               | 155.069809 | 497.214 | 154.063  | 3.013   | C8H10O3<br>C11H16N5O     | C10787 | [M+H] <sup>+</sup>     | mzCloud   | 0.61386 | pos | 1 | 6204615.13 |
| M282T328 | Methyladenosine                        | 282.117805 | 328.106 | NULL     | 6.71826 | 7P (C5H8O6<br>C9H12N3O7) | C04779 | [M+H] <sup>+</sup>     | BioDeepDB | 0.71964 | pos | 1 | 49641508.9 |
| M305T84  | 2',3'-Cyclic CMP<br>2',6'-Dihydroxy-   | 305.036556 | 83.9405 | 305.0413 | 15.5517 | P                        | C02354 | [M] <sup>-</sup>       | BioDeepDB | 0.73594 | neg | 1 | 1934311.11 |
| M181T318 | 4'-<br>2(3H)-                          | 181.049433 | 318.232 | 182.0579 | 6.578   | C9H10O4                  | C10680 | [M-H] <sup>-</sup>     | MoNA      | 0.71004 | neg | 1 | 4543415.09 |
| M166T683 | Benzothiazolethi<br>20-Carboxy-        | 165.977487 | 682.948 | 166.9863 | 9.26145 | C7H5NS2                  | C14437 | [M-H] <sup>-</sup>     | MoNA      | 0.79227 | neg | 1 | 970100.271 |
| M367T737 | leukotriene B4<br>20-Hydroxy-          | 367.207539 | 737.198 | 366.2042 | 10.7214 | C20H30O6                 | C05950 | [M+H] <sup>+</sup>     | BioDeepDB | 0.76201 | pos | 1 | 5337566.37 |
| M351T629 | leukotriene B4<br>20-                  | 351.217995 | 629.272 | 352.225  | 0.77289 | C20H32O5                 | C04853 | [M-H] <sup>-</sup>     | MoNA      | 0.74082 | neg | 1 | 823961.383 |
| M463T830 | Hydroxyecdysone<br>20a,22b-            | 463.29955  | 830.193 | 480.3087 | 3.70344 | C27H44O7                 | C02633 | [M+H-H2O] <sup>+</sup> | mzCloud   | 0.68311 | pos | 1 | 2964469.73 |
| M419T589 | Dihydroxycholest<br>21-                | 419.364229 | 589.053 | 418.3447 | 29.2189 | C27H46O3                 | C05501 | [M+H] <sup>+</sup>     | BioDeepDB | 0.97399 | pos | 1 | 1905623.71 |
| M332T626 | Hydroxypregnenol<br>25-                | 332.242487 | 626.183 | 332.2351 | 22.234  | C21H32O3                 | C05485 | [M] <sup>-</sup>       | BioDeepDB | 0.9371  | neg | 1 | 1420506.1  |
| M401T552 | Hydroxycholester<br>3-(2-              | 401.085909 | 552.493 | 402.3498 | 3.81407 | C27H46O2                 | C15519 | [M-H] <sup>-</sup>     | BioDeepDB | 3.2E-05 | neg | 2 | 11386550.9 |
| M165T408 | Hydroxyphenyl)pr<br>3-(3,4-            | 165.053133 | 408.368 | 166.063  | 10.2472 | C9H10O3                  | C01198 | [M-H] <sup>-</sup>     | BioDeepDB | 0.00388 | neg | 2 | 11058655.1 |
| M209T456 | Dihydroxy-5-<br>3-(4-                  | 209.044698 | 456.2   | 210.0528 | 3.83802 | C10H10O5                 | C05619 | [M-H] <sup>-</sup>     | BioDeepDB | 0.6209  | neg | 1 | 6080253.41 |
| M269T779 | Hydroxyphenyl)-<br>3-Amino-4-          | 269.082239 | 779.407 | 270.0892 | 1.1361  | C16H14O4                 | C15531 | [M-H] <sup>-</sup>     | MoNA      | 0.62921 | neg | 1 | 309236.681 |
| M154T274 | hydroxybenzoate<br>3-                  | 154.096859 | 273.531 | 153.0426 | 25.673  | C7H7NO3                  | C12115 | [M+H] <sup>+</sup>     | BioDeepDB | 0.00561 | pos | 2 | 17584945.4 |
| M102T63  | Aminoisobutanoic                       | 102.054408 | 63.4597 | 103.0633 | 2.71874 | C4H9NO2                  | C05145 | [M-H] <sup>-</sup>     | BioDeepDB | 0.62036 | neg | 1 | 294988.915 |
| M259T712 | 3-Androstano1                          | 259.236866 | 711.984 | 276.2453 | 3.85596 | C19H32O                  | C15638 | [M+H-H2O] <sup>+</sup> | BioDeepDB | 0.99462 | pos | 1 | 3042780.34 |

|            |                                              |            |         |          |         |           |        |                       |           |             |   |            |
|------------|----------------------------------------------|------------|---------|----------|---------|-----------|--------|-----------------------|-----------|-------------|---|------------|
| M173T66_1  | 3-<br>Dehydroshikimate                       | 172.976525 | 65.7101 | 172.0372 | 4.09947 | C7H8O5    | C02637 | [M+H] <sup>+</sup>    | BioDeepDB | 1.3E-06 pos | 2 | 21402132.2 |
| M300T784   | 3-Deoxy-lyxo-<br>Dehydrosphingani            | 300.288807 | 783.78  | 299.2824 | 2.89376 | C18H37NO2 | C02934 | [M+H] <sup>+</sup>    | BioDeepDB | 0.64362 pos | 1 | 10661932.3 |
| M222T229   | heptulosaric                                 | 222.039547 | 228.961 | 222.0376 | 8.76774 | C7H10O8   | C21044 | [M] <sup>-</sup>      | MoNA      | 0.99932 neg | 1 | 349078.617 |
| M207T521_1 | 3-Dimethylallyl-<br>4-<br>3-                 | 207.101413 | 520.739 | 206.0943 | 0.78854 | C12H14O3  | C12458 | [M+H] <sup>+</sup>    | mzCloud   | 0.88849 pos | 1 | 7856953.88 |
| M152T447_1 | Hydroxyanthranil<br>3-Hydroxybenzoic<br>acid | 152.033012 | 446.967 | 153.0426 | 15.208  | C7H7NO3   | C00632 | [M-H] <sup>-</sup>    | mzCloud   | 1.6E-07 neg | 2 | 84149000.9 |
| M137T205_1 | 3-Hydroxybenzyl<br>alcohol                   | 137.023051 | 204.895 | 138.0317 | 0.69033 | C7H6O3    | C00587 | [M-H] <sup>-</sup>    | BioDeepDB | 8.8E-19 neg | 2 | 21915308.9 |
| M124T785_1 | 3-<br>alcohol                                | 124.087151 | 785.136 | 124.0524 | 0.29224 | C7H8O2    | C03351 | [M] <sup>+</sup>      | BioDeepDB | 0.5802 pos  | 1 | 37031053.8 |
| M145T764_1 | Hydroxymethylglu<br>3-                       | 145.048282 | 763.856 | 162.0528 | 20.1064 | C6H10O5   | C03761 | [M+H-2H] <sup>+</sup> | BioDeepDB | 3.1E-08 pos | 2 | 42531506.8 |
| M151T532_1 | Hydroxyphenylace<br>3-                       | 151.037679 | 532.372 | 152.0473 | 15.5284 | C8H8O3    | C05593 | [M-H] <sup>-</sup>    | MoNA      | 4.2E-05 neg | 2 | 73770154.8 |
| M140T299_1 | Hydroxypicolinic<br>3-                       | 140.03331  | 299.493 | 139.0269 | 6.18142 | C6H5NO3   | C18620 | [M+H] <sup>+</sup>    | mzCloud   | 0.63872 pos | 1 | 17385322.3 |
| M159T487_2 | Hydroxyvalproic<br>3-                        | 159.100435 | 487.329 | 160.1099 | 13.7598 | C8H16O3   | C16651 | [M-H] <sup>-</sup>    | BioDeepDB | 0.71942 neg | 1 | 8659444.26 |
| M156T254   | Indoleacetoni tri                            | 156.064126 | 254.446 | 156.0687 | 29.3071 | C10H8N2   | C02938 | [M] <sup>+</sup>      | BioDeepDB | 0.42074 pos | 2 | 45147206.6 |
| M340T487_1 | 3-Ketolactose<br>3-                          | 340.100125 | 487.329 | 340.1006 | 1.39633 | C12H20O11 | C05403 | [M] <sup>-</sup>      | MetaDNA   | 0.0004 neg  | 2 | 3341132.88 |
| M168T527   | Methoxytyramine<br>3-Methyl-1-               | 168.101416 | 526.676 | 167.0946 | 2.73497 | C9H13NO2  | C05587 | [M+H] <sup>+</sup>    | mzCloud   | 0.73572 pos | 1 | 5042094.57 |
| M211T512   | (2, 4, 6-<br>3-Methyl-2-                     | 211.095968 | 511.77  | 210.0892 | 2.40649 | C11H14O4  | C07350 | [M+H] <sup>+</sup>    | MoNA      | 0.62714 pos | 1 | 4887604.07 |
| M129T278   | oxovaleric acid                              | 129.053938 | 278.267 | 130.063  | 13.794  | C6H10O3   | C03465 | [M-H] <sup>-</sup>    | MoNA      | 1.9E-06 neg | 2 | 6830879.26 |
| M150T425_1 | 3-Methyladenine<br>3-                        | 150.127103 | 424.572 | 149.0701 | 6.79315 | C6H7N5    | C00913 | [M+H] <sup>+</sup>    | BioDeepDB | 9.3E-09 pos | 2 | 75732152.3 |
| M88T329    | Methylbutanamine                             | 88.1118719 | 329.481 | 87.1048  | 2.31694 | C5H13N    | C02640 | [M+H] <sup>+</sup>    | mzCloud   | 0.60117 pos | 1 | 65457189.9 |
| M165T167   | 3-Methylguanine                              | 165.065318 | 167.01  | 165.0651 | 1.32352 | C6H7N5O   | C02230 | [M] <sup>-</sup>      | MoNA      | 0.9887 neg  | 1 | 1443065.98 |



|          |                   |            |         |          |         |           |        |            |           |         |     |   |            |
|----------|-------------------|------------|---------|----------|---------|-----------|--------|------------|-----------|---------|-----|---|------------|
| M130T50  | 3-Methylindole    | 129.974289 | 50.3393 | 131.0735 | 1.87563 | C9H9N     | C08313 | [M-H]-     | BioDeepDB | 0.59697 | neg | 1 | 677994.162 |
| M148T694 | 3-Methyloxindole  | 148.120628 | 693.81  | 147.0684 | 7.06032 | C9H9NO    | C02366 | [M+H]+     | BioDeepDB | 0.65664 | pos | 1 | 14212129.9 |
| M151T300 | Methylsalicylate  | 151.037742 | 300.176 | 152.0473 | 15.1119 | C8H8O3    | C14088 | [M-H]-     | mzCloud   | 0.78308 | neg | 1 | 4429782.92 |
| M119T344 | Methylthiopropio  | 119.033791 | 344.233 | 120.0245 | 21.4068 | C4H8O2S   | C08276 | [M-H]-     | BioDeepDB | 2.8E-05 | neg | 2 | 22077839.4 |
| M166T148 | 3-Methylxanthine  | 166.050845 | 148.117 | 166.0491 | 10.5105 | C6H6N4O2  | C16357 | [M]+       | BioDeepDB | 0.00759 | pos | 2 | 65580061.3 |
| M547T823 | Mycarosylerythro  | 547.354764 | 822.881 | 546.3404 | 12.9491 | C28H50O10 | C06630 | [M+H]+     | BioDeepDB | 0.99996 | pos | 1 | 32940821.2 |
| M315T709 | Methylquercetin   | 315.050841 | 708.697 | 316.0583 | 0.58026 | C16H12O7  | C04443 | [M-H]-     | mzCloud   | 4.9E-06 | neg | 2 | 3923053.18 |
| M207T41  | 3-Oxalomalate     | 206.987814 | 40.6031 | 206.0063 | 1.35666 | C6H6O8    | C01990 | [M+H]+     | BioDeepDB | 0.61479 | pos | 1 | 1291477.17 |
| M159T474 | 3-Oxoalproic acid | 159.101279 | 473.597 | 158.0943 | 1.86809 | C8H14O3   | C16652 | [M+H]+     | BioDeepDB | 0.59451 | pos | 1 | 5836308.11 |
| M179T93  | Succinoylpyridin  | 179.054448 | 92.7272 | 179.0582 | 20.957  | C9H9NO3   | C19569 | [M]+       | mzCloud   | 0.92983 | pos | 1 | 29996922.3 |
| M245T347 | Dimethoxybenzidi  | 245.130898 | 347.175 | 244.1212 | 9.8793  | C14H16N2O | C19231 | [M+H]+     | mzCloud   | 0.75976 | pos | 1 | 6434655.97 |
| M225T826 | Tetrahydroxystil  | 225.057905 | 826.333 | 244.0736 | 11.974  | C14H12O4  | C05901 | [M-H2O-H]- | BioDeepDB | 0.70042 | neg | 1 | 38276295.3 |
| M149T510 | 1-benzopyran-2-   | 149.060416 | 510.333 | 148.0524 | 4.76905 | C9H8O2    | C02274 | [M+H]+     | MoNA      | 0.02512 | pos | 2 | 44380142.9 |
| M137T750 | Dihydroxybenzald  | 137.022952 | 750.298 | 138.0317 | 10.6994 | C7H6O3    | C16700 | [M-H]-     | MoNA      | 9.7E-06 | neg | 2 | 14553568.7 |
| M168T106 | Dihydroxybenzene  | 168.101397 | 105.503 | 168.0423 | 3.15652 | C8H8O4    | C01161 | [M]+       | BioDeepDB | 0.60697 | pos | 1 | 4736486.29 |
| M167T256 | 3,4-              |            |         |          |         |           |        |            |           |         |     |   |            |
| _1       | Dihydroxymandeli  | 167.030911 | 255.723 | 184.037  | 8.05344 | C8H8O5    | C05580 | [M+H-H2O]+ | BioDeepDB | 1.6E-05 | pos | 2 | 1003057.99 |
| M171T56  | Dihydroxyphenylg  | 171.064538 | 56.1096 | 170.0579 | 3.73083 | C8H10O4   | C05576 | [M+H]+     | BioDeepDB | 4.5E-06 | pos | 2 | 2593108.51 |
| M183T339 | Dihydroxyphenylp  | 183.064746 | 339.085 | 182.0579 | 2.34837 | C9H10O4   | C10447 | [M+H]+     | mzCloud   | 0.61178 | pos | 1 | 5003602.31 |
| M167T833 | Dimethoxybenzald  | 167.06971  | 833.029 | 166.063  | 3.35087 | C9H10O3   | C02201 | [M+H]+     | MoNA      | 0.61169 | pos | 1 | 4401731.62 |

|          |                                         |             |          |           |          |                       |        |                        |           |          |     |   |             |
|----------|-----------------------------------------|-------------|----------|-----------|----------|-----------------------|--------|------------------------|-----------|----------|-----|---|-------------|
| M194T758 | 3, 4-Methylenedioxyam<br>3, 5-Diiodo-L- | 194. 117003 | 758. 236 | 193. 1103 | 2. 84364 | C11H15N02             | C07577 | [M+H] <sup>+</sup>     | MoNA      | 0. 66261 | pos | 1 | 26699689. 3 |
| M433T500 | tyrosine<br>3, 7-Dimethyluric           | 433. 110864 | 499. 759 | 432. 8672 | 18. 2859 | C9H9I2N03             | C01060 | [M] <sup>-</sup>       | BioDeepDB | 0. 98982 | neg | 1 | 7385518. 26 |
| M196T106 | acid                                    | 196. 060336 | 105. 537 | 196. 0596 | 3. 54816 | C7H8N4O3<br>C10H14N5O | C16360 | [M] <sup>-</sup>       | mzCloud   | 0. 62298 | neg | 1 | 2953405. 51 |
| M346T247 | 3'-AMP                                  | 346. 055089 | 246. 757 | 347. 0631 | 2. 05506 | 7P<br>C9H14N3O8       | C01367 | [M-H] <sup>-</sup>     | BioDeepDB | 0. 6092  | neg | 1 | 1156564. 25 |
| M323T369 | 3'-CMP<br>3', 5'-Cyclic                 | 323. 051875 | 368. 559 | 323. 0519 | 0. 07893 | P<br>C10H12N5O        | C05822 | [M] <sup>-</sup>       | GNPS      | 0. 98463 | neg | 1 | 5792031. 59 |
| M313T187 | dAMP<br>3alpha, 11beta-                 | 313. 057515 | 186. 689 | 313. 0576 | 0. 27261 | 5P                    | C00968 | [M] <sup>-</sup>       | MoNA      | 0. 98532 | neg | 1 | 1784538. 9  |
| M307T824 | Dihydroxy-<br>4-(beta-                  | 307. 226401 | 824. 311 | 306. 2195 | 1. 21924 | C19H30O3              | C14606 | [M+H] <sup>+</sup>     | mzCloud   | 0. 58935 | pos | 1 | 8784189. 88 |
| M154T173 | Acetylaminoethyl<br>4-(beta-D-          | 154. 096932 | 173. 407 | 153. 0902 | 3. 53026 | C7H11N3O              | C05135 | [M+H] <sup>+</sup>     | mzCloud   | 0. 61172 | pos | 1 | 307980619   |
| M281T329 | _1<br>Glucosyloxy)benz<br>4-            | 281. 065533 | 328. 999 | 300. 0845 | 2. 05271 | C13H16O8              | C03993 | [M-H2O-H] <sup>-</sup> | MetaDNA   | 0. 01235 | neg | 2 | 22928922. 3 |
| M225T416 | (Dimethylamino)a<br>4-                  | 225. 12285  | 416. 239 | 225. 1266 | 16. 6571 | C14H15N3<br>C10H13N3O | C03764 | [M] <sup>+</sup>       | MoNA      | 0. 99226 | pos | 1 | 11814419. 3 |
| M208T398 | (Methylnitrosami<br>4-                  | 208. 107615 | 397. 878 | 207. 1008 | 2. 21376 | 2                     | C16453 | [M+H] <sup>+</sup>     | BioDeepDB | 3. 8E-07 | pos | 2 | 62464509. 2 |
| M145T37  | Acetamidobutanoi<br>4-                  | 145. 035232 | 37. 1891 | 145. 0739 | 0. 31378 | C6H11N03              | C02946 | [M] <sup>+</sup>       | BioDeepDB | 0. 005   | pos | 2 | 2348196. 74 |
| M210T178 | Acetylamino biphe                       | 210. 087019 | 177. 649 | 211. 0997 | 25. 7259 | C14H13N0              | C20285 | [M-H] <sup>-</sup>     | mzCloud   | 1        | neg | 1 | 21582435. 9 |
| M130T62  | 4-Acetylbutyrate<br>4-                  | 130. 064801 | 62. 1777 | 130. 063  | 13. 8473 | C6H10O3               | C02129 | [M] <sup>+</sup>       | MoNA      | 0. 842   | pos | 1 | 3467064. 46 |
| M174T74  | Aminobenzenesulf<br>4-                  | 174. 024101 | 73. 8324 | 173. 0147 | 12. 2083 | C6H7NO3S              | C06335 | [M+H] <sup>+</sup>     | MoNA      | 0. 99992 | pos | 1 | 197572707   |
| M152T684 | Aminosalicylate<br>4-Chloro-            | 152. 033693 | 684. 499 | 153. 0426 | 10. 7286 | C7H7NO3<br>C20H29C10  | C02518 | [M-H] <sup>-</sup>     | mzCloud   | 0. 70595 | neg | 1 | 4131609. 91 |
| M336T522 | 17alpha-methyl-                         | 336. 188346 | 522. 177 | 336. 1856 | 8. 14505 | 2                     | C15358 | [M] <sup>+</sup>       | mzCloud   | 0. 79083 | pos | 1 | 3822452. 82 |
| M110T39  | 4-Chloroaniline<br>4-                   | 110. 008342 | 39. 4128 | 127. 0189 | 28. 4005 | C6H6ClN               | C14450 | [M+H-H2O] <sup>+</sup> | MoNA      | 1        | pos | 1 | 2346891. 91 |
| M130T291 | Guanidinobutanal                        | 130. 097185 | 291. 307 | 129. 0902 | 2. 23641 | C5H11N3O              | C02647 | [M+H] <sup>+</sup>     | MetaDNA   | 0. 05976 | pos | 2 | 75622069. 5 |

|          |                                     |            |         |          |         |                     |        |                        |           |         |     |   |            |
|----------|-------------------------------------|------------|---------|----------|---------|---------------------|--------|------------------------|-----------|---------|-----|---|------------|
| M146T108 | 4-<br>Guanidinobutanoic acid        | 146.091012 | 107.537 | 145.0851 | 9.337   | C5H11N3O2           | C01035 | [M+H] <sup>+</sup>     | BioDeepDB | 2.9E-16 | pos | 2 | 1205040144 |
| M85T800  | butenoic acid<br>4-Hydroxy-2-       | 85.0280229 | 800.484 | 84.0211  | 4.15274 | C4H4O2              | C17601 | [M+H] <sup>+</sup>     | BioDeepDB | 0.64361 | pos | 1 | 6907298.05 |
| M190T420 | quinolinecarboxy<br>4-Hydroxy-2-    | 190.048808 | 420.274 | 189.0426 | 5.61818 | C10H7N03            | C01717 | [M+H] <sup>+</sup>     | mzCloud   | 4.2E-09 | pos | 2 | 148351777  |
| M161T38  | quinolone<br>4-Hydroxy-3-(3-        | 161.049561 | 38.3208 | 161.0477 | 11.5525 | C9H7N02             | C16716 | [M] <sup>+</sup>       | mzCloud   | 0.9125  | pos | 1 | 3172264.58 |
| M187T164 | methyl-2-                           | 187.107771 | 163.846 | 204.115  | 1.09548 | C13H16O2            | C10702 | [M+H-H2O] <sup>+</sup> | GNPS      | 0.62877 | pos | 1 | 40174291.2 |
| M151T575 | 4-Hydroxy-3-<br>methylbenzoate      | 151.03814  | 575.222 | 152.0473 | 12.4705 | C8H8O3              | C21167 | [M-H] <sup>-</sup>     | mzCloud   | 0.73132 | neg | 1 | 8564554.94 |
| M110T104 | 4-Hydroxyaniline<br>4-              | 110.059699 | 104.493 | 109.0528 | 3.42211 | C6H7N0              | C02372 | [M+H] <sup>+</sup>     | mzCloud   | 0.64319 | pos | 1 | 89298280.6 |
| M123T504 | Hydroxybenzaldehy<br>4-             | 123.044172 | 504.466 | 122.0368 | 0.7813  | C7H6O2              | C00633 | [M+H] <sup>+</sup>     | mzCloud   | 0.58761 | pos | 1 | 28441948.2 |
| M133T758 | Hydroxybenzeneac<br>4-              | 133.049337 | 757.881 | 133.0528 | 26.025  | C8H7N0              | C03766 | [M] <sup>-</sup>       | BioDeepDB | 0.86778 | neg | 1 | 9134260.53 |
| M137T512 | Hydroxybenzoate<br>4-               | 137.022876 | 512.228 | 138.0317 | 11.2969 | C7H6O3              | C00156 | [M-H] <sup>-</sup>     | mzCloud   | 1.7E-11 | neg | 2 | 22477953.2 |
| M164T340 | Hydroxycinnamic<br>4-               | 164.042445 | 339.772 | 164.0473 | 0.29064 | C9H8O3<br>C14H20N4O | C00811 | [M] <sup>-</sup>       | BioDeepDB | 2.1E-20 | neg | 2 | 10075321.1 |
| M257T411 | Hydroxycinnamoyl<br>4-              | 257.139047 | 411.444 | 276.1586 | 4.52165 | 2                   | C04498 | [M-H2O-H] <sup>-</sup> | MoNA      | 0.76363 | neg | 1 | 769041.985 |
| M293T188 | 4-<br>Hydroxycinnamyl<br>4-         | 293.105334 | 188.174 | 312.1209 | 9.63415 | C15H20O7            | C05855 | [M-H2O-H] <sup>-</sup> | mzCloud   | 0.83692 | neg | 1 | 1053244.22 |
| M289T834 | Hydroxyestradiol<br>4-Hydroxyphenyl | 289.179137 | 834.486 | 288.1725 | 2.2091  | C18H24O3            | C14209 | [M+H] <sup>+</sup>     | BioDeepDB | 0.59984 | pos | 1 | 2988326.08 |
| M151T792 | acetate<br>4-Hydroxyphenyl-         | 151.038191 | 791.678 | 152.0473 | 12.1369 | C8H8O3              | C13636 | [M-H] <sup>-</sup>     | BioDeepDB | 0.73045 | neg | 1 | 6228161.45 |
| M165T826 | 2-propionic acid<br>4-              | 165.052969 | 826.333 | 166.063  | 16.659  | C9H10O3             | C03080 | [M-H] <sup>-</sup>     | MoNA      | 7.3E-05 | neg | 2 | 9380593.97 |
| M281T147 | Hydroxyphenylace<br>4-              | 281.087858 | 147.455 | 281.0899 | 7.26412 | C13H15N06           | C05595 | [M] <sup>-</sup>       | MetaDNA   | 0.00967 | neg | 2 | 6646513    |
| M181T106 | Hydroxyphenylpyr                    | 181.049623 | 105.503 | 180.0423 | 0.25689 | C9H8O4              | C01179 | [M+H] <sup>+</sup>     | BioDeepDB | 0.59089 | pos | 1 | 64029951.6 |
| M121T543 | 4-Hydroxystyrene                    | 121.064552 | 542.766 | 120.0575 | 1.84751 | C8H8O               | C05627 | [M+H] <sup>+</sup>     | BioDeepDB | 0.59904 | pos | 1 | 15721160.2 |

|          |                                 |            |         |          |         |           |        |                        |           |         |     |   |            |
|----------|---------------------------------|------------|---------|----------|---------|-----------|--------|------------------------|-----------|---------|-----|---|------------|
| M388T636 | 4-<br>Hydroxytamoxifen          | 388.219836 | 636.473 | 387.2198 | 18.649  | C26H29NO2 | C05011 | [M+H] <sup>+</sup>     | BioDeepDB | 0.91102 | pos | 1 | 2554348.3  |
| M149T500 | 4-<br>Isopropylbenzal           | 149.095856 | 500.045 | 148.0888 | 1.47744 | C10H12O   | C06577 | [M+H] <sup>+</sup>     | mzCloud   | 0.59549 | pos | 1 | 9276548.75 |
| M125T543 | 4-<br>4-Methylcatechol          | 125.05999  | 542.766 | 124.0524 | 2.31721 | C7H8O2    | C06730 | [M+H] <sup>+</sup>     | BioDeepDB | 6.4E-06 | pos | 2 | 125249761  |
| M175T592 | 4-<br>Methylumbellifer          | 175.038836 | 592.284 | 176.0473 | 6.78462 | C10H8O3   | C03081 | [M-H] <sup>-</sup>     | MoNA      | 0.03549 | neg | 2 | 1036214.79 |
| M353T144 | 4-<br>Methylumbellifer          | 353.08968  | 143.959 | 352.0794 | 8.50825 | C16H16O9  | C11584 | [M+H] <sup>+</sup>     | mzCloud   | 0.83559 | pos | 1 | 162720037  |
| M217T506 | 4-<br>Methylumbellifer          | 217.049394 | 505.99  | 218.0579 | 5.66813 | C12H10O4  | C03837 | [M-H] <sup>-</sup>     | MoNA      | 0.88837 | neg | 1 | 728295.472 |
| M156T310 | 4-<br>Nitrocatechol             | 156.028799 | 310.075 | 155.0219 | 1.92683 | C6H5NO4   | C02235 | [M+H] <sup>+</sup>     | BioDeepDB | 0.65484 | pos | 1 | 71823999.8 |
| M140T177 | 4-<br>Nitrophenol               | 140.033369 | 177.295 | 139.0269 | 5.762   | C6H5NO3   | C00870 | [M+H] <sup>+</sup>     | MoNA      | 0.66559 | pos | 1 | 978562139  |
| M219T258 | 4-<br>Nitrophenyl<br>phosphate  | 218.995871 | 258.208 | 218.9933 | 11.7387 | C6H6NO6P  | C03360 | [M] <sup>-</sup>       | MoNA      | 0.71323 | neg | 1 | 461809.512 |
| M207T545 | 4-<br>Octylphenol               | 207.174097 | 545.203 | 206.1671 | 1.17899 | C14H22O   | C14132 | [M+H] <sup>+</sup>     | MoNA      | 0.98827 | pos | 1 | 138828880  |
| M110T237 | 4-<br>Oxoproline                | 110.022682 | 236.518 | 129.0426 | 13.8844 | C5H7NO3   | C01877 | [M-H2O-H] <sup>-</sup> | mzCloud   | 0.82229 | neg | 1 | 7043118.32 |
| M165T515 | 4-<br>Phenylbutyrate            | 165.090697 | 514.727 | 164.0837 | 1.6882  | C10H12O2  | C21793 | [M+H] <sup>+</sup>     | mzCloud   | 0.623   | pos | 1 | 8402297.26 |
| M137T496 | 4-<br>Propylphenol              | 137.095882 | 495.779 | 136.0888 | 1.41522 | C9H12O    | C14311 | [M+H] <sup>+</sup>     | BioDeepDB | 0.84816 | pos | 1 | 4961471.68 |
| M183T78  | 4-<br>Pyridoxic acid            | 182.983157 | 78.3841 | 183.0532 | 12.0322 | C8H9NO4   | C00847 | [M] <sup>+</sup>       | BioDeepDB | 2.5E-11 | pos | 2 | 168943902  |
| M156T69  | 4-<br>tert-<br>Quinolinecarboxy | 155.992804 | 69.2834 | 173.0477 | 3.58019 | C10H7NO2  | C06414 | [M+H-2O] <sup>+</sup>  | BioDeepDB | 0.12096 | pos | 2 | 2704260.49 |
| M131T169 | 4-<br>Butylphenol               | 131.089111 | 168.507 | 150.1045 | 22.8917 | C10H14O   | C14200 | [M-H2O-H] <sup>-</sup> | mzCloud   | 0.95068 | neg | 1 | 4433435.76 |
| M171T642 | 4,4'-<br>Toluenesulfonami       | 171.033928 | 642.211 | 171.0354 | 8.60466 | C7H9NO2S  | C14412 | [M] <sup>+</sup>       | MoNA      | 0.99925 | pos | 1 | 17680141.6 |
| M233T163 | 4,4'-<br>Dichlorobenzophe       | 232.987568 | 162.728 | 249.9952 | 0.93535 | C13H8Cl2O | C06643 | [M+H-2O] <sup>+</sup>  | MoNA      | 0.98752 | pos | 1 | 9855644.7  |
| M200T323 | 4,4'-<br>Diaminodiphenyl        | 200.092986 | 322.536 | 200.095  | 9.88111 | C12H12N2O | C14759 | [M] <sup>+</sup>       | mzCloud   | 0.94409 | pos | 1 | 44950239.4 |

|            |                                        |            |         |          |         |                       |        |            |           |         |     |   |            |
|------------|----------------------------------------|------------|---------|----------|---------|-----------------------|--------|------------|-----------|---------|-----|---|------------|
| M209T379   | 4,4'-Methylene bis(2-4,4'-Methylene-   | 209.139304 | 379.194 | 226.147  | 1.25191 | C15H18N2<br>C13H12C12 | C19260 | [M+H2O]+   | MoNA      | 0.98849 | pos | 1 | 11277714.3 |
| M266T218   | bis-(2-4,4'-Methylene-                 | 266.03241  | 217.866 | 266.0378 | 20.0865 | N2<br>C15H10N2O       | C10999 | [M]+       | mzCloud   | 0.84944 | pos | 1 | 1487385.22 |
| M250T453   | Methylenedipheny 4,4'-                 | 250.071886 | 453.126 | 250.0742 | 9.25458 | 2                     | C19453 | [M]-       | mzCloud   | 0.83476 | neg | 1 | 1484501.77 |
| M249T72    | Sulfonyldiphenol 4,4'-                 | 249.024769 | 72.0941 | 250.03   | 8.21218 | C12H10O4S             | C14216 | [M-H]-     | mzCloud   | 0.90564 | neg | 1 | 34521406   |
| M217T645   | Thiodianiline 4,5-                     | 217.085213 | 645.278 | 216.0721 | 26.8874 | C12H12N2S             | C19303 | [M+H]+     | mzCloud   | 0.85226 | pos | 1 | 4256483.18 |
| M159T63    | Dihydroorotic 4,5,6,7-                 | 158.96099  | 63.4448 | 158.0328 | 1.3977  | C5H6N2O4              | C00337 | [M+H]+     | BioDeepDB | 7.1E-05 | pos | 2 | 414912821  |
| M139T43    | Tetrahydroisoxaz 4'-                   | 139.049708 | 43.4241 | 140.0586 | 11.6225 | C6H8N2O2              | C13693 | [M-H]-     | BioDeepDB | 0.99988 | neg | 1 | 141894.816 |
| M381T439   | Demethylpodophyl 4',5,6,7-             | 381.093767 | 439.27  | 400.1158 | 9.60731 | C21H20O8              | C10553 | [M-H2O-H]- | OTCML     | 0.87021 | neg | 1 | 706881.519 |
| M325T784   | Tetramethoxyflav 5-(2-                 | 325.104675 | 783.78  | 342.1103 | 5.56424 | C19H18O6              | C14472 | [M+H2O]+   | GNPS      | 0.67076 | pos | 1 | 8313078.45 |
| M143T52    | Hydroxyethyl)-4-5-                     | 143.039743 | 52.4521 | 143.0405 | 5.29249 | C6H9NOS               | C04294 | [M]+       | BioDeepDB | 0.7614  | pos | 1 | 23479589.7 |
| M126T551   | Aminoimidazole-5-Aminolevulinic acid   | 126.054281 | 550.919 | 126.0542 | 0.63986 | C4H6N4O               | C04051 | [M]+       | BioDeepDB | 0.60285 | pos | 1 | 25033422.1 |
| M132T90    | acid                                   | 132.065784 | 89.6999 | 131.0582 | 2.14685 | C5H9NO3               | C00430 | [M+H]+     | BioDeepDB | 0.69646 | pos | 1 | 144107250  |
| M102T406   | 5-Aminopentanal                        | 102.091264 | 406.289 | 101.0841 | 1.09838 | C5H11NO               | C12455 | [M+H]+     | MetaDNA   | 0.00096 | pos | 2 | 31103700   |
| M116T33_1  | 5-Aminopentanoic acid                  | 115.918585 | 32.8715 | 117.079  | 8.7724  | C5H11NO2              | C00431 | [M-H]-     | BioDeepDB | 0.00013 | neg | 2 | 13621083.7 |
| M154T143_1 | 5-                                     | 154.049135 | 142.85  | 153.0426 | 4.7632  | C7H7NO3<br>C11H12N2O  | C07138 | [M+H]+     | MoNA      | 0.99606 | pos | 1 | 16710214.3 |
| M221T240   | Aminosalicylate 5-Hydroxy-L-tryptophan | 221.091314 | 239.913 | 220.0848 | 0.87333 | 3                     | C00643 | [M+H]+     | BioDeepDB | 0.60031 | pos | 1 | 8571951.29 |
| M191T798   | 5-                                     | 191.108779 | 797.757 | 191.0582 | 11.4192 | C10H9NO3              | C05635 | [M]-       | BioDeepDB | 4.6E-09 | neg | 2 | 612305995  |
| M162T308   | Hydroxyindoleace                       | 162.102193 | 307.735 | 162.1004 | 11.062  | C6H14N2O3             | C16741 | [M]+       | MoNA      | 0.74771 | pos | 1 | 760085.912 |
| M127T359_2 | 5-Hydroxylysine 5-Hydroxymethylfur     | 127.038419 | 359.32  | 126.0317 | 3.79007 | C6H6O3                | C11101 | [M+H]+     | OTCML     | 8.3E-15 | pos | 2 | 2810713262 |

|          |                                   |            |         |          |         |            |        |                        |           |         |     |   |            |
|----------|-----------------------------------|------------|---------|----------|---------|------------|--------|------------------------|-----------|---------|-----|---|------------|
| M128T39  | 5-<br>Hydroxymethylfur            | 128.044137 | 39.4128 | 128.0473 | 24.6987 | C6H8O3     | C20443 | [M] <sup>+</sup>       | MetaDNA   | 0.0232  | pos | 2 | 15722156.9 |
| M143T75  | 5-<br>Hydroxymethylura            | 143.048037 | 74.9588 | 142.0378 | 20.7006 | C5H6N2O3   | C03088 | [M+H] <sup>+</sup>     | BioDeepDB | 0.82609 | pos | 1 | 124774516  |
| M117T696 | 5-<br>Hydroxypentanoic            | 117.053735 | 695.893 | 118.063  | 16.9888 | C5H10O3    | C02804 | [M-H] <sup>-</sup>     | MetaDNA   | 0.00039 | neg | 2 | 10306650.3 |
| M221T210 | 5-<br>Hydroxytryptopha            | 221.091055 | 210.186 | 220.0848 | 4.61789 | C11H12N2O  | C01017 | [M+H] <sup>+</sup>     | mzCloud   | 0.74269 | pos | 1 | 9079927    |
| M131T790 | 5-<br>methylphenol                | 131.089851 | 790.161 | 150.1045 | 28.5368 | C10H14O    | C09840 | [M-H2O-H] <sup>-</sup> | BioDeepDB | 0.8572  | neg | 1 | 3358141.91 |
| M219T485 | 5-<br>Methoxydimethylt            | 219.14881  | 485.471 | 218.1419 | 1.67018 | C13H18N2O  | C08309 | [M+H] <sup>+</sup>     | MoNA      | 0.60101 | pos | 1 | 3741541.3  |
| M204T487 | 5-<br>Methoxyindoleace            | 204.065396 | 487.329 | 205.0739 | 6.01794 | C11H11N3O  | C05660 | [M-H] <sup>-</sup>     | mzCloud   | 0.0002  | neg | 2 | 9113310.98 |
| M190T337 | 5-<br>Methoxytryptamin            | 190.108242 | 336.681 | 190.1106 | 12.4059 | C11H14N2O  | C05659 | [M] <sup>-</sup>       | MoNA      | 0.99993 | neg | 1 | 1710842.47 |
| M241T379 | 5-Methyl-2'-<br>deoxycytidine     | 241.107323 | 379.066 | 241.1063 | 4.24494 | C10H15N3O  | C03592 | [M] <sup>-</sup>       | mzCloud   | 0.65709 | neg | 1 | 3610717.68 |
| M125T68  | 5-<br>Methylcytosine              | 125.05933  | 68.0903 | 125.0589 | 3.34061 | C5H7N3O    | C02376 | [M] <sup>+</sup>       | mzCloud   | 0.63253 | pos | 1 | 6078774.75 |
| M459T628 | 5-<br>Methyltetrahydro            | 459.188934 | 627.731 | 459.1866 | 5.08193 | C20H25N7O  | C00440 | [M] <sup>-</sup>       | BioDeepDB | 0.79168 | neg | 1 | 429258.945 |
| M298T388 | 5-<br>Methylthioadenos            | 298.093907 | 387.763 | 297.0896 | 9.96023 | C11H15N5O  | C00170 | [M+H] <sup>+</sup>     | BioDeepDB | 5E-18   | pos | 2 | 102980902  |
| M281T416 | 5-Nitro-2-(3-<br>phenylpropylamin | 281.095188 | 416.128 | 300.111  | 9.17071 | C16H16N2O  | C13705 | [M-H2O-H] <sup>-</sup> | BioDeepDB | 0.99945 | neg | 1 | 940659.532 |
| M229T84  | 5-<br>Phosphoribosylam            | 229.029066 | 83.9405 | 229.0351 | 26.3442 | C5H12N2O7P | C03090 | [M] <sup>-</sup>       | MetaDNA   | 0.00242 | neg | 2 | 2365133.92 |
| M101T240 | 5-<br>Valerolactone               | 101.096211 | 239.913 | 100.0524 | 2.07024 | C5H8O2     | C02240 | [M+H] <sup>+</sup>     | BioDeepDB | 0.00319 | pos | 2 | 30301958.7 |
| M219T136 | 5,6,7-<br>Trimethoxycoumar        | 219.060714 | 135.971 | 236.0685 | 1.60569 | C12H12O5   | C09313 | [M+H-H2O] <sup>+</sup> | mzCloud   | 0.68739 | pos | 1 | 5043045.65 |
| M159T110 | 5,6,7,8-<br>_1<br>Tetrahydro-2-   | 159.075263 | 110.047 | 176.0837 | 6.30471 | C11H12O2   | C14111 | [M+H-H2O] <sup>+</sup> | BioDeepDB | 0.99782 | pos | 1 | 21958521.6 |
| M177T472 | 5,7-<br>Dihydroxychromon          | 177.019392 | 471.768 | 178.0266 | 0.33224 | C9H6O4     | C09001 | [M-H] <sup>-</sup>     | OTCML     | 0.59936 | neg | 1 | 26314874.8 |
| M281T826 | 5,7-<br>Dimethoxyflavone          | 281.086827 | 826.333 | 282.0892 | 17.4104 | C17H14O4   | C10029 | [M-H] <sup>-</sup>     | MoNA      | 0.75034 | neg | 1 | 814838.287 |

|          |                          |            |         |          |         |           |           |                       |                       |           |         |     |            |            |
|----------|--------------------------|------------|---------|----------|---------|-----------|-----------|-----------------------|-----------------------|-----------|---------|-----|------------|------------|
| M229T682 | 5'-Deoxy-5-fluorouridine | 229.060094 | 681.885 | 246.0652 | 10.1638 | 5         | C9H11FN2O | C12739                | [M+H-20] <sup>+</sup> | BioDeepDB | 0.80265 | pos | 1          | 2022446.43 |
| M251T342 | 5'-Deoxyadenosine        | 251.101744 | 341.802 | 251.1018 | 0.22484 | 3         | C10H13N5O | C05198                | [M] <sup>+</sup>      | BioDeepDB | 0.58098 | pos | 1          | 19305931.2 |
| M299T669 | 5a-Pregnane-3,20-dione   | 299.234373 | 668.867 | 316.2402 | 5.37199 | C21H32O2  | C03681    | [M+H-20] <sup>+</sup> | BioDeepDB             | 2.9E-06   | pos     | 2   | 14020687.1 |            |
| M205T666 | 6-Acetyl-D-glucose       | 205.069874 | 666.137 | 222.074  | 16.1314 | C8H14O7   | C02655    | [M+H-20] <sup>+</sup> | MetaDNA               | 0.01472   | pos     | 2   | 21939515.1 |            |
| M328T442 | 6-Acetylmorphine         | 328.153145 | 442.005 | 327.1471 | 3.75248 | C19H21N04 | C11781    | [M+H] <sup>+</sup>    | mzCloud               | 0.72568   | pos     | 1   | 1816368.18 |            |
| M215T205 | 6-Aminopenicillan        | 215.054464 | 204.895 | 216.0569 | 22.5051 | S         | C02954    | [M-H] <sup>-</sup>    | BioDeepDB             | 0.08203   | neg     | 2   | 6274673.47 |            |
| M226T180 | 6-Benzylaminopurin       | 226.108446 | 179.75  | 225.1014 | 1.0183  | C12H11N5  | C11263    | [M+H] <sup>+</sup>    | mzCloud               | 0.60503   | pos     | 1   | 12598493.8 |            |
| M133T232 | 6-Hydroxyhexanoic        | 133.086392 | 231.773 | 132.0786 | 3.54729 | C6H12O3   | C06103    | [M+H] <sup>+</sup>    | MoNA                  | 0.61266   | pos     | 1   | 120534919  |            |
| M249T355 | 6-Hydroxymelatonin       | 249.123666 | 355.41  | 248.1161 | 1.16522 | C13H16N2O | C05643    | [M+H] <sup>+</sup>    | mzCloud               | 0.58738   | pos     | 1   | 9309413.09 |            |
| M138T98  | 6-Hydroxynicotinic       | 138.018154 | 97.682  | 139.0269 | 10.6473 | C6H5NO3   | C01020    | [M-H] <sup>-</sup>    | MoNA                  | 8.5E-10   | neg     | 2   | 83179142.4 |            |
| M353T754 | 6-Keto-prostaglandin     | 353.228149 | 753.987 | 370.2355 | 0.23553 | C20H34O6  | C05961    | [M+H-20] <sup>+</sup> | mzCloud               | 0.57798   | pos     | 1   | 92673778.2 |            |
| M369T632 | 6-Ketoprostaglandin      | 369.222942 | 631.982 | 368.2199 | 11.4669 | C20H32O6  | C05962    | [M+H] <sup>+</sup>    | BioDeepDB             | 0.00309   | pos     | 2   | 6577844.8  |            |
| M209T772 | 6-Methoxymellein         | 209.079143 | 772.206 | 208.0736 | 7.92286 | C11H12O4  | C02381    | [M+H] <sup>+</sup>    | BioDeepDB             | 0.70423   | pos     | 1   | 47106436.1 |            |
| M150T87  | 6-Methylaminopurin       | 150.075539 | 86.6643 | 149.0701 | 12.2379 | C6H7N5    | C08434    | [M+H] <sup>+</sup>    | mzCloud               | 0.70582   | pos     | 1   | 95765302.4 |            |
| M166T540 | 6-Methylmercaptopu       | 166.025785 | 540.152 | 166.0313 | 2.60923 | C6H6N4S   | C16614    | [M] <sup>-</sup>      | BioDeepDB             | 0.60253   | neg     | 1   | 495560.995 |            |
| M261T753 | 6-Paradol                | 261.183471 | 752.541 | 278.1882 | 7.76921 | C17H26O3  | C10482    | [M+H-20] <sup>+</sup> | BioDeepDB             | 1.5E-06   | pos     | 2   | 458401376  |            |
| M275T811 | 6-Phosphogluconic        | 275.018896 | 811.292 | 276.0246 | 5.71555 | C6H13O10P | C00345    | [M-H] <sup>-</sup>    | BioDeepDB             | 0.6589    | neg     | 1   | 1072358.78 |            |
| M165T362 | 6-Thiourate              | 164.985059 | 362.384 | 184.0055 | 12.4308 | C5H4N4O2S | C16613    | [M-20-H] <sup>-</sup> | mzCloud               | 0.91647   | neg     | 1   | 250284.179 |            |
| M293T122 | 6-Tuliposide B           | 293.085809 | 122.381 | 294.0951 | 6.87489 | C11H18O9  | C21186    | [M-H] <sup>-</sup>    | MetaDNA               | 0.02694   | neg     | 2   | 6410947.85 |            |

|                            |                                           |                          |                    |                      |                   |                       |                  |              |                      |                    |            |        |                          |
|----------------------------|-------------------------------------------|--------------------------|--------------------|----------------------|-------------------|-----------------------|------------------|--------------|----------------------|--------------------|------------|--------|--------------------------|
| M499T834                   | 6' '-<br>Malonylgenistin<br>6beta-        | 499.073498               | 833.866            | 518.106              | 28.2767           | C24H22O13             | C16192           | [M-H2O-H]-   | GNPS                 | 0.82307            | neg        | 1      | 2790492.55               |
| M305T727                   | Hydroxytestoster<br>7-Isopropyl-1,4-      | 305.208432               | 726.707            | 304.2038             | 8.66274           | C19H28O3              | C14497           | [M+H]+       | BioDeepDB            | 8.1E-07            | pos        | 2      | 9893468.32               |
| M199T562                   | dimethylazulene                           | 199.147448               | 561.955            | 198.1409             | 3.40806           | C15H18                | C09675           | [M+H]+       | MoNA                 | 0.82386            | pos        | 1      | 13404907.9               |
| M149T250<br>M165T233<br>_1 | 7-Methyladenine<br>7-Methylguanine        | 149.070414<br>165.062941 | 250.144<br>233.081 | 149.0701<br>165.0651 | 2.10885<br>12.837 | C6H7N5<br>C6H7N5O     | C02241<br>C02242 | [M]+<br>[M]+ | BioDeepDB<br>mzCloud | 0.61216<br>0.70198 | pos<br>pos | 1<br>1 | 5709268.91<br>955430.151 |
| M166T109                   | 7-Methylxanthine<br>7-                    | 166.0496                 | 109.475            | 166.0491             | 3.00979           | C6H6N4O2              | C16353           | [M]-         | mzCloud              | 0.62042            | neg        | 1      | 13103605.4               |
| M389T448                   | Oxodeoxycholate<br>7,8-                   | 389.253999               | 447.531            | 406.2719             | 26.8911           | C24H38O5              | C04643           | [M+H-H2O]+   | MoNA                 | 1                  | pos        | 1      | 1599833.92               |
| M255T234                   | Dihydroneopterin<br>8-                    | 255.096876               | 234.447            | 255.0968             | 0.29958           | C9H13N5O4             | C04874           | [M]+         | BioDeepDB            | 0.58407            | pos        | 1      | 10411497.3               |
| M146T494                   | Hydroxyquinoline<br>8-                    | 146.059699               | 494.289            | 145.0528             | 2.57971           | C9H7NO                | C19434           | [M+H]+       | mzCloud              | 0.64812            | pos        | 1      | 6388928.98               |
| M321T280                   | Prenylnaringenin<br>8,11,14-              | 321.108652               | 280.275            | 340.1311             | 12.5551           | C20H20O5              | C18023           | [M-H2O-H]-   | OTCML                | 0.99994            | neg        | 1      | 1748589.61               |
| M289T648                   | Eicosatrienoic<br>9-                      | 289.251275               | 648.026            | 306.2559             | 9.71284           | C20H34O2<br>C20H17N3O | C03242           | [M+H-H2O]+   | BioDeepDB            | 0.34316            | pos        | 2      | 2325991.93               |
| M363T472                   | Aminocampthoeci<br>9-cis-Retinoic<br>acid | 363.118477               | 471.768            | 363.1219             | 9.44447           | 4                     | C16822           | [M]-         | OTCML                | 0.79511            | neg        | 1      | 1396707.85               |
| M300T469                   |                                           | 300.216143               | 469.252            | 300.2089             | 24.126            | C20H28O2              | C15493           | [M]+         | BioDeepDB            | 0.99462            | pos        | 1      | 8593167.19               |
| M294T794                   | 9-OxoODE                                  | 294.21202                | 793.649            | 294.2195             | 25.4253           | C18H30O3              | C14766           | [M]+         | BioDeepDB            | 0.00015            | pos        | 2      | 11021534.3               |
| M314T787                   | 9,10-DHOME<br>9,10-                       | 314.240871               | 787.078            | 314.2457             | 15.3683           | C18H34O4              | C14828           | [M]-         | BioDeepDB            | 6.8E-08            | neg        | 2      | 40460267.2               |
| M296T814                   | Epoxyoctadecenoic                         | 296.230171               | 814.095            | 296.2351             | 16.6384           | C18H32O3              | C14825           | [M]+         | BioDeepDB            | 0.75373            | pos        | 1      | 85430535.5               |
| M312T823                   | 9(S)-HPODE                                | 312.221087               | 823.375            | 312.2301             | 28.8661           | C18H32O4              | C14827           | [M]-         | BioDeepDB            | 2.7E-06            | neg        | 2      | 4001391.52               |
| M184T218                   | A alpha C                                 | 184.085721               | 217.866            | 183.0796             | 6.53292           | C11H9N3               | C19186           | [M+H]+       | MoNA                 | 0.99802            | pos        | 1      | 9318399.04               |
| M269T471                   | Abacavir                                  | 269.148285               | 470.602            | 286.1542             | 5.6447            | C14H18N6O             | C07624           | [M+H-H2O]+   | BioDeepDB            | 0.91002            | pos        | 1      | 6627888.06               |



|                      |                           |            |         |          |         |                        |        |                               |           |         |     |   |            |
|----------------------|---------------------------|------------|---------|----------|---------|------------------------|--------|-------------------------------|-----------|---------|-----|---|------------|
| M303T836             | Abietate                  | 303.230786 | 836.034 | 302.2246 | 3.59429 | C20H3002<br>C12H14N2O  | C06087 | [M+H] <sup>+</sup>            | mzCloud   | 2.7E-09 | pos | 2 | 29531587.5 |
| M218T106             | Abrine                    | 218.101961 | 105.537 | 218.1055 | 16.3547 | 2                      | C02983 | [M] <sup>-</sup>              | OTCML     | 0.79209 | neg | 1 | 2803045.25 |
| M283T642<br>M742T308 | Acacetin                  | 283.06288  | 641.603 | 284.0685 | 5.85055 | C16H1205               | C01470 | [M-H] <sup>-</sup>            | MoNA      | 6.4E-10 | neg | 2 | 795191.102 |
| _2                   | Acanthoside D             | 742.289971 | 307.735 | 742.2684 | 0.98672 | C34H46018<br>C4H10N03P | C10543 | [M-]<br>H20+NH4] <sup>+</sup> | OTCML     | 0.73679 | pos | 1 | 2922558.04 |
| M183T821<br>_2       | Acephate                  | 183.010438 | 821.334 | 183.0119 | 7.98898 | S                      | C14426 | [M] <sup>+</sup>              | BioDeepDB | 0.99898 | pos | 1 | 13361973.4 |
| M152T537             | Acetaminophen             | 152.070005 | 536.761 | 151.0633 | 3.75806 | C8H9N02<br>C4H6N4O3S   | C06804 | [M+H] <sup>+</sup>            | BioDeepDB | 0.00248 | pos | 2 | 32408163.2 |
| M222T733             | Acetazolamide             | 221.993321 | 732.773 | 221.9881 | 23.5186 | 2                      | C06805 | [M] <sup>+</sup>              | MoNA      | 0.94203 | pos | 1 | 4789727.62 |
| M85T190              | Acetoacetic acid          | 85.0276651 | 189.571 | 102.0317 | 15.6995 | C4H6O3<br>C15H20N2O    | C00164 | [M+H-H2O] <sup>+</sup>        | BioDeepDB | 1.4E-07 | pos | 2 | 523849313  |
| M323T290             | Acetohexamide             | 323.108543 | 289.534 | 324.1144 | 4.39118 | 4S                     | C06806 | [M-H] <sup>-</sup>            | BioDeepDB | 0.6644  | neg | 1 | 2194726.77 |
| M89T167              | Acetoin                   | 89.0593601 | 166.613 | 88.0524  | 3.54667 | C4H8O2<br>C23H29N3O    | C00466 | [M+H] <sup>+</sup>            | BioDeepDB | 0.61102 | pos | 1 | 181846269  |
| M394T582             | Acetophenazine            | 394.193345 | 581.625 | 411.198  | 7.04956 | 2S                     | C06807 | [M+H-H2O] <sup>+</sup>        | mzCloud   | 0.82144 | pos | 1 | 9895627.98 |
| M121T510             | Acetophenone              | 121.06453  | 510.333 | 120.0575 | 2.03384 | C8H8O                  | C07113 | [M+H] <sup>+</sup>            | BioDeepDB | 0.62242 | pos | 1 | 7603188.89 |
| M195T450             | Acetosyringone            | 195.066207 | 450.052 | 196.0736 | 0.60236 | C10H1204               | C10664 | [M-H] <sup>-</sup>            | mzCloud   | 0.60344 | neg | 1 | 1729230.99 |
| M383T253<br>M146T106 | Acetyl-maltose            | 383.118388 | 252.703 | 384.1268 | 2.9647  | C14H24012              | C02130 | [M-H] <sup>-</sup>            | MetaDNA   | 0.02002 | neg | 2 | 3370956.62 |
| _2                   | Acetylcholine             | 146.117108 | 105.503 | 146.1181 | 3.36781 | C7H16N02               | C01996 | [M+H] <sup>+</sup>            | BioDeepDB | 1.4E-05 | pos | 2 | 60767569.2 |
| M181T43              | Acetylcholine<br>chloride | 180.990663 | 43.0471 | 181.087  | 3.37733 | C1                     | C08201 | [M] <sup>+</sup>              | BioDeepDB | 0.00013 | pos | 2 | 20750228.8 |
| M163T68<br>M179T378  | Acetylcysteine            | 162.998385 | 68.0903 | 163.0303 | 1.95076 | C5H9N03S               | C06809 | [M] <sup>+</sup>              | BioDeepDB | 0.00102 | pos | 2 | 55339254.9 |
| _3                   | Acetylisoniazid           | 179.070075 | 377.64  | 179.0695 | 3.20826 | C8H9N3O2               | C07585 | [M] <sup>-</sup>              | BioDeepDB | 0.72157 | neg | 1 | 4767313.2  |
| M224T761             | Aciclovir                 | 224.077131 | 760.976 | 225.0862 | 7.89323 | C8H11N5O3              | C06810 | [M-H] <sup>-</sup>            | BioDeepDB | 0.71305 | neg | 1 | 5482009.63 |

|          |                          |            |         |          |         |      |  |           |        |                        |           |         |     |   |            |  |  |  |
|----------|--------------------------|------------|---------|----------|---------|------|--|-----------|--------|------------------------|-----------|---------|-----|---|------------|--|--|--|
| M812T494 |                          |            |         |          |         |      |  | C42H53N01 |        |                        |           |         |     |   |            |  |  |  |
| _1       | Aclacinomycin A          | 812.3674   | 494.289 | 811.3415 | 22.8961 | 5    |  | C30H35N01 | C18638 | [M+H] <sup>+</sup>     | BioDeepDB | 1       | pos | 1 | 1237353.89 |  |  |  |
| M568T503 | Aclacinomycin T          | 568.220393 | 502.873 | 569.2261 | 2.76147 | 0    |  | C34H47N01 | C18634 | [M-H] <sup>-</sup>     | BioDeepDB | 0.99243 | neg | 1 | 483100.924 |  |  |  |
| M661T665 | Aconifine                | 661.295826 | 664.745 | 661.3098 | 21.1318 | 2    |  | C34H47N01 | C08655 | [M] <sup>+</sup>       | MoNA      | 1       | pos | 1 | 1047784.79 |  |  |  |
| M646T480 | Aconitine                | 646.316008 | 479.527 | 645.3149 | 9.42556 | 1    |  | C8H12N5O4 | C06091 | [M+H] <sup>+</sup>     | OTCML     | 0.99952 | pos | 1 | 3789043.11 |  |  |  |
| M273T284 | Adefovir                 | 273.059375 | 284.377 | 273.0627 | 12.1428 | P    |  |           | C11277 | [M] <sup>+</sup>       | mzCloud   | 0.93917 | pos | 1 | 14217053.8 |  |  |  |
| M134T347 | Adenine                  | 134.046296 | 347.166 | 135.0545 | 0.3219  |      |  | C5H5N5    | C00147 | [M-H] <sup>-</sup>     | BioDeepDB | 7.9E-28 | neg | 2 | 58574213.1 |  |  |  |
| M268T290 | Adenosine                | 268.102072 | 289.912 | 267.0968 | 6.28524 | 4    |  | C10H13N5O |        |                        |           |         |     |   |            |  |  |  |
| _2       | Adenosine                | 268.102072 | 289.912 | 267.0968 | 6.28524 | 4    |  | C15H23N5O | C00212 | [M+H] <sup>+</sup>     | BioDeepDB | 1.1E-19 | pos | 2 | 5156553270 |  |  |  |
| M559T709 | diphosphate              | 559.080575 | 708.697 | 559.0717 | 15.8749 | 14P2 |  |           | C00301 | [M] <sup>-</sup>       | BioDeepDB | 0.99699 | neg | 1 | 169936.001 |  |  |  |
| M408T75  | Adenosine phosphosulfate | 407.990525 | 74.6705 | 427.0199 | 26.9236 | 10PS |  | C10H14N5O |        |                        |           |         |     |   |            |  |  |  |
| M408T75  | phosphosulfate           | 407.990525 | 74.6705 | 427.0199 | 26.9236 | 10PS |  |           | C00224 | [M-H2O-H] <sup>-</sup> | BioDeepDB | 0.99955 | neg | 1 | 11841810.9 |  |  |  |
| M127T227 | Adipate                  | 127.038289 | 227.421 | 146.0579 | 9.61386 |      |  | C6H10O4   | C06104 | [M-H2O-H] <sup>-</sup> | mzCloud   | 0.04659 | neg | 2 | 15049075.5 |  |  |  |
| M499T727 | Adouetine X              | 499.321992 | 727.22  | 500.3363 | 13.9938 | 4    |  | C28H44N4O |        |                        |           |         |     |   |            |  |  |  |
| M499T727 | Adouetine X              | 499.321992 | 727.22  | 500.3363 | 13.9938 | 4    |  |           | C09993 | [M-H] <sup>-</sup>     | GNPS      | 0.80245 | neg | 1 | 464806.014 |  |  |  |
| M408T72  | ADP                      | 408.011154 | 72.0941 | 427.0294 | 0.35292 | 10P2 |  | C10H15N5O |        |                        |           |         |     |   |            |  |  |  |
| M408T72  | ADP                      | 408.011154 | 72.0941 | 427.0294 | 0.35292 | 10P2 |  |           | C00008 | [M-H2O-H] <sup>-</sup> | BioDeepDB | 0.59259 | neg | 1 | 1823739.82 |  |  |  |
| M299T467 | Adrenosterone            | 299.16088  | 467.127 | 300.1725 | 14.5197 |      |  | C19H24O3  | C05285 | [M-H] <sup>-</sup>     | MoNA      | 0.97427 | neg | 1 | 767306.356 |  |  |  |
| M339T835 | Aesculin                 | 339.079837 | 835.329 | 340.0794 | 22.5233 |      |  | C15H16O9  | C09264 | [M-H] <sup>-</sup>     | BioDeepDB | 3.1E-06 | neg | 2 | 15362563.9 |  |  |  |
| M313T838 | Aflatoxin B1             | 313.235768 | 837.524 | 312.0634 | 1.23266 |      |  | C17H12O6  | C06800 | [M+H] <sup>+</sup>     | BioDeepDB | 0.61322 | pos | 1 | 43241406.8 |  |  |  |
| M295T490 | Aflatoxin B2             | 295.055507 | 490.434 | 314.079  | 17.2938 |      |  | C17H14O6  | C16753 | [M-H2O-H] <sup>-</sup> | MoNA      | 0.97748 | neg | 1 | 1707529.61 |  |  |  |
| M328T191 | Aflatoxin G1             | 328.060271 | 191.259 | 328.0583 | 5.99915 |      |  | C17H12O7  | C16755 | [M] <sup>-</sup>       | mzCloud   | 0.73135 | neg | 1 | 3702665.95 |  |  |  |
| M329T693 | Aflatoxin G2             | 329.065951 | 692.781 | 330.074  | 2.20597 |      |  | C17H14O7  | C16754 | [M-H] <sup>-</sup>     | MoNA      | 0.70697 | neg | 1 | 1293661.7  |  |  |  |
| M131T78  | Agmatine                 | 131.128494 | 78.3841 | 130.1218 | 4.43674 |      |  | C5H14N4   | C00179 | [M+H] <sup>+</sup>     | mzCloud   | 6.3E-07 | pos | 2 | 841873829  |  |  |  |

|          |                            |            |         |          |         |                        |        |            |           |         |     |   |            |
|----------|----------------------------|------------|---------|----------|---------|------------------------|--------|------------|-----------|---------|-----|---|------------|
| M447T475 | Agnuside                   | 447.126891 | 474.888 | 466.1475 | 4.96273 | C22H26O11<br>C9H15N4O8 | C09765 | [M-H2O-H]- | mzCloud   | 0.63028 | neg | 1 | 319275.758 |
| M339T135 | AICAR                      | 339.07251  | 134.574 | 338.0628 | 5.76207 | P<br>C21H24N2O         | C04677 | [M+H]+     | BioDeepDB | 0.6424  | pos | 1 | 7088207.23 |
| M353T418 | Ajmalicine                 | 353.181692 | 417.676 | 352.1787 | 12.1288 | 3<br>C14H20ClN         | C09024 | [M+H]+     | BioDeepDB | 0.99992 | pos | 1 | 4041972.38 |
| M270T488 | Alachlor                   | 270.128505 | 488.437 | 269.1183 | 10.8412 | O2                     | C10928 | [M+H]+     | MoNA      | 0.94466 | pos | 1 | 5506542.77 |
| M90T110  | Alanine                    | 90.0550196 | 110.047 | 89.0477  | 0.48422 | C3H7NO2                | C01401 | [M+H]+     | mzCloud   | 0.59305 | pos | 1 | 45548439   |
| M162T181 | Alanopine                  | 162.074894 | 181.154 | 161.0688 | 7.28996 | C6H11NO4               | C03210 | [M+H]+     | GNPS      | 0.678   | pos | 1 | 34464847.2 |
| M233T701 | Alantolactone              | 233.153656 | 700.758 | 232.1463 | 0.34516 | C15H20O2<br>C12H15N3O  | C09289 | [M+H]+     | MoNA      | 0.6804  | pos | 1 | 3680671.48 |
| M265T534 | Albendazole                | 265.094953 | 533.958 | 265.0885 | 24.3439 | 2S                     | C01779 | [M]+       | MoNA      | 0.25913 | pos | 2 | 174312387  |
| M282T522 | albendazole S-<br>_1 oxide | 282.093508 | 522.177 | 281.0834 | 9.996   | 3S                     | C02809 | [M+H]+     | MoNA      | 0.9195  | pos | 1 | 2920171.1  |
| M479T297 | Albiflorin                 | 479.158684 | 297.149 | 480.1632 | 5.83915 | C23H28O11              | C17457 | [M-H]-     | OTCML     | 0.71448 | neg | 1 | 1629169.9  |
| M220T811 | Albuterol                  | 220.13292  | 811.292 | 239.1521 | 3.78476 | C13H21NO3              | C06811 | [M-H2O-H]- | BioDeepDB | 0.9945  | neg | 1 | 1961477.41 |
| M343T780 | Aldosterone                | 343.078558 | 780.043 | 360.1937 | 0.00111 | C21H28O5<br>C21H32NO6  | C01780 | [M+H-H2O]+ | BioDeepDB | 0.60893 | pos | 1 | 5722858.98 |
| M399T466 | Alfentanil<br>all-trans-   | 399.257526 | 466.162 | 416.2536 | 28.4522 | 3                      | C08005 | [M+H-H2O]+ | MoNA      | 0.99698 | pos | 1 | 2112895.54 |
| M300T438 | Retinoic acid              | 300.196511 | 437.571 | 300.2089 | 4.72452 | C20H28O2               | C00777 | [M]+       | BioDeepDB | 0.0046  | pos | 2 | 9706369.88 |
| M176T205 | Allantoic acid             | 176.054798 | 204.747 | 176.0546 | 1.12273 | C4H8N4O4               | C00499 | [M]+       | MetaDNA   | 0.00019 | pos | 2 | 14900360.5 |
| M158T104 | Allantoin                  | 158.044154 | 104.493 | 158.044  | 0.97734 | C4H6N4O3               | C01551 | [M]+       | BioDeepDB | 0.58736 | pos | 1 | 9829189.87 |
| M391T820 | Allocholic acid            | 391.279179 | 819.78  | 408.2876 | 2.52141 | C24H40O5               | C00695 | [M+H-H2O]+ | MoNA      | 0.61333 | pos | 1 | 20470958.8 |
| M370T573 | Allocriptopine             | 370.167927 | 573.072 | 369.1576 | 7.90762 | C21H23NO5<br>C7H14N2O4 | C02134 | [M+H]+     | OTCML     | 3.2E-10 | pos | 2 | 6701008.99 |
| M222T297 | Allocystathionin<br>e      | 222.068174 | 296.739 | 222.0674 | 3.48444 | S                      | C00542 | [M]+       | BioDeepDB | 0.66069 | pos | 1 | 687555.53  |

|                                      |                                                                    |                                       |                               |                                  |                               |                                         |                            |                                                                    |                                   |                               |                   |             |                                        |
|--------------------------------------|--------------------------------------------------------------------|---------------------------------------|-------------------------------|----------------------------------|-------------------------------|-----------------------------------------|----------------------------|--------------------------------------------------------------------|-----------------------------------|-------------------------------|-------------------|-------------|----------------------------------------|
| M137T314<br>M179T93_1                | allopurinol<br>Allose                                              | 137.045394<br>179.054772              | 314.259<br>92.9618            | 136.0385<br>180.0634             | 2.8635<br>0.29307             | C5H4N4O<br>C6H12O6                      | C06816<br>C01487           | [M+] <sup>+</sup><br>[M-H] <sup>-</sup>                            | MoNA<br>BioDeepDB                 | 0.99266<br>0.57857            | pos<br>neg        | 1<br>1      | 2710926.82<br>7767660709               |
| M394T347                             | Aloesin                                                            | 394.123117                            | 347.175                       | 394.1264                         | 8.28579                       | C19H22O9                                | C08994                     | [M] <sup>+</sup>                                                   | mzCloud                           | 0.72761                       | pos               | 1           | 12215572.8                             |
| M208T210<br>M832T606_3               | alpha-Asarone<br>alpha-Chaconine                                   | 208.107305<br>832.485502              | 210.186<br>606.096            | 208.1099<br>851.5031             | 12.6828<br>0.95148            | C12H16O3<br>C45H73NO1<br>4              | C17846<br>C10796           | [M] <sup>+</sup><br>[M-H2O-H] <sup>-</sup>                         | OTCML<br>MoNA                     | 0.84313<br>0.76099            | pos<br>neg        | 1<br>1      | 6558155.03<br>1235043.19               |
| M219T440                             | alpha-Cyperone                                                     | 219.173745                            | 440.459                       | 218.1671                         | 1.6215                        | C15H22O                                 | C17090                     | [M+H] <sup>+</sup>                                                 | OTCML                             | 0.88037                       | pos               | 1           | 5185969.79                             |
| M179T600                             | Alpha-D-Glucose                                                    | 179.053134                            | 599.904                       | 180.0634                         | 16.5673                       | C6H12O6                                 | C00267                     | [M-H] <sup>-</sup>                                                 | BioDeepDB                         | 5E-09                         | neg               | 2           | 62142888.4                             |
| M297T817<br>M575T651_3<br>M665T147_3 | Alphadimorphecolic<br>alpha-Ergocryptine<br>alpha-Isomaltosyl-1,3- | 297.24267<br>575.293998<br>665.227858 | 816.953<br>650.898<br>147.455 | 296.2351<br>575.3108<br>666.2219 | 0.98777<br>29.2065<br>19.8949 | C18H32O3<br>C32H41N5O<br>5<br>C24H42O21 | C14767<br>C07545<br>C21659 | [M+H] <sup>+</sup><br>[M] <sup>+</sup><br>[M-H] <sup>-</sup>       | BioDeepDB<br>MoNA<br>MetaDNA      | 0.6007<br>1<br>0.03093        | pos<br>pos<br>neg | 1<br>1<br>2 | 236171616<br>18379001.4<br>57484797.2  |
| M117T199<br>M279T800_3               | Ketoisovaleric<br>Alpha-Linolenic<br>acid                          | 117.054243<br>279.230156              | 199.43<br>800.484             | 116.0473<br>278.2246             | 2.8411<br>6.16005             | C5H8O3<br>C18H30O2                      | C00141<br>C06427           | [M+H] <sup>+</sup><br>[M+H] <sup>+</sup>                           | MetaDNA<br>BioDeepDB              | 3.9E-05<br>2.4E-09            | pos<br>pos        | 2<br>2      | 90925880.6<br>19897974.8               |
| M332T777                             | Alpha-Linolenoyl<br>ethanolamide                                   | 332.29055                             | 777.245                       | 349.2981                         | 0.34845                       | C22H39NO2                               | C13828                     | [M+H-H2O] <sup>+</sup>                                             | BioDeepDB                         | 0.62299                       | pos               | 1           | 189520810                              |
| M410T814                             | alpha-Mangostin                                                    | 410.17455                             | 814.095                       | 410.1729                         | 4.02225                       | C24H26O6                                | C10080                     | [M] <sup>+</sup>                                                   | BioDeepDB                         | 0.63209                       | pos               | 1           | 9803215.41                             |
| M319T220                             | alpha-Naphthyl-<br>beta-D-                                         | 319.082213                            | 219.979                       | 320.0896                         | 0.27311                       | C16H16O7                                | C11586                     | [M-H] <sup>-</sup>                                                 | BioDeepDB                         | 0.98532                       | neg               | 1           | 1293079.92                             |
| M414T785<br>M866T563_2<br>M137T753_2 | alpha-Narcotine<br>alpha-Solanine<br>Alpha-Terpineol               | 414.154879<br>866.497495<br>137.13256 | 785.136<br>562.946<br>752.541 | 413.1475<br>867.498<br>154.1358  | 0.24933<br>7.81414<br>3.21172 | C22H23NO7<br>C45H73NO1<br>5<br>C10H18O  | C09592<br>C10820<br>C09902 | [M+H] <sup>+</sup><br>[M-H] <sup>-</sup><br>[M+H-H2O] <sup>+</sup> | mzCloud<br>BioDeepDB<br>BioDeepDB | 0.61271<br>0.87154<br>0.67086 | pos<br>neg<br>pos | 1<br>1<br>1 | 7499161.33<br>1381839.18<br>14372210.5 |
| M429T490                             | alpha-Tocopherol                                                   | 429.211141                            | 490.434                       | 430.3811                         | 14.553                        | C29H50O2                                | C02477                     | [M-H] <sup>-</sup>                                                 | BioDeepDB                         | 0.34754                       | neg               | 2           | 1768706.87                             |

|           |                     |            |         |          |         |                            |        |                        |           |         |     |   |            |
|-----------|---------------------|------------|---------|----------|---------|----------------------------|--------|------------------------|-----------|---------|-----|---|------------|
| M423T837  | Alpha-Tocotrienol   | 423.324988 | 836.769 | 424.3341 | 4.33674 | C29H44O2                   | C14153 | [M-H] <sup>-</sup>     | BioDeepDB | 0.61839 | neg | 1 | 428711.966 |
| M305T401  | alpha-Zearalanol    | 305.170492 | 400.59  | 322.178  | 0.24228 | C18H26O5                   | C14752 | [M+H2O] <sup>+</sup>   | mzCloud   | 0.64431 | pos | 1 | 7275378.83 |
| M89T33_3  | alpha,omega-Diamine | 89.107093  | 33.467  | 88.10005 | 2.59631 | C2H8N2 (C2H4) <sub>n</sub> | C02896 | [M+H] <sup>+</sup>     | mzCloud   | 0.63179 | pos | 1 | 9990898.71 |
| M309T652  | Alprazolam          | 309.084369 | 651.956 | 308.0829 | 18.7036 | C17H13ClN4                 | C06817 | [M+H] <sup>+</sup>     | MoNA      | 2.5E-06 | pos | 2 | 215915396  |
| M394T143  | Altanserin          | 394.132182 | 142.85  | 411.1417 | 5.28821 | C22H22FN3O2S               | C11734 | [M+H2O] <sup>+</sup>   | MoNA      | 0.99675 | pos | 1 | 5376935.2  |
| M587T798  | Amarogentin         | 587.174303 | 797.773 | 586.1686 | 0.50632 | C29H30O13                  | C09767 | [M+H] <sup>+</sup>     | OTCML     | 0.64765 | pos | 1 | 7732697.73 |
| M583T388  | Amaroswerin         | 583.158479 | 388.326 | 602.1636 | 22.7532 | C29H30O14                  | C17519 | [M-H2O-H] <sup>-</sup> | GNPS      | 1       | neg | 1 | 382648.591 |
| M197T122  | Amifostine          | 197.047288 | 122.007 | 214.0541 | 3.1563  | C5H15N2O3PS                | C06819 | [M+H2O] <sup>+</sup>   | MoNA      | 0.90041 | pos | 1 | 1033596.71 |
| M585T668  | Amikacin            | 585.289785 | 667.609 | 585.2857 | 6.97933 | C13C22H43N5O               | C06820 | [M] <sup>+</sup>       | MoNA      | 0.7599  | pos | 1 | 1940039.19 |
| M230T466  | Amiloride           | 230.05666  | 466.162 | 229.0479 | 6.34793 | C6H8ClN7O                  | C06821 | [M+H] <sup>+</sup>     | BioDeepDB | 0.67565 | pos | 1 | 8284525.71 |
| M144T336  | Aminoadipic acid    | 144.063859 | 336.344 | 161.0688 | 17.303  | C6H11NO4                   | C00956 | [M+H2O] <sup>+</sup>   | BioDeepDB | 1.5E-06 | pos | 2 | 410511411  |
| M114T456  | Aminocaproic acid   | 114.090513 | 456.126 | 131.0946 | 29.3357 | C6H13NO2                   | C02378 | [M+H2O] <sup>+</sup>   | MoNA      | 0.0004  | pos | 2 | 49402516.3 |
| M405T503  | Aminopentol         | 405.348821 | 503.046 | 405.3454 | 8.38222 | C22H47NO5                  | C19805 | [M] <sup>+</sup>       | mzCloud   | 0.95725 | pos | 1 | 6103852.11 |
| M277T82_2 | Amitriptyline       | 277.186119 | 82.0569 | 277.1831 | 10.8917 | C20H23N                    | C06824 | [M] <sup>+</sup>       | MoNA      | 0.99981 | pos | 1 | 6215073.54 |
| M84T90    | Amitrole            | 84.0437529 | 89.6999 | 84.0436  | 1.81916 | C2H4N4                     | C11261 | [M] <sup>+</sup>       | MoNA      | 0.9901  | pos | 1 | 215852953  |
| M409T748  | Amlodipine          | 409.157257 | 748.486 | 408.1452 | 11.6265 | C20H25ClN                  | C06825 | [M+H] <sup>+</sup>     | BioDeepDB | 0.76162 | pos | 1 | 19265105.3 |
| M128T310  | Ammelide            | 128.034173 | 310.075 | 128.0334 | 6.04112 | C3H4N4O2                   | C08734 | [M] <sup>+</sup>       | BioDeepDB | 0.99758 | pos | 1 | 6880638.27 |
| M128T341  | Ammeline            | 128.053385 | 340.548 | 127.0494 | 25.7028 | C3H5N5O                    | C08733 | [M+H] <sup>+</sup>     | BioDeepDB | 1       | pos | 1 | 6085900.2  |
| M227T427  | Amobarbital         | 227.138037 | 427.362 | 226.1317 | 4.13612 | C11H18N2O3                 | C07536 | [M+H] <sup>+</sup>     | mzCloud   | 0.89417 | pos | 1 | 23925847.1 |

|          |                               |             |         |          |         |           |           |        |          |           |         |     |   |            |
|----------|-------------------------------|-------------|---------|----------|---------|-----------|-----------|--------|----------|-----------|---------|-----|---|------------|
| M338T823 | Amodiaquine                   | 338.13604   | 822.881 | 355.1451 | 4.8094  | 30        | C20H22C1N | C07626 | [M+H2O]+ | BioDeepDB | 0.63322 | pos | 1 | 1706316.41 |
| M348T278 | Amoxicillin                   | 348.096577  | 277.699 | 365.1045 | 1.40456 | 5S        | C16H19N3O | C06827 | [M+H2O]+ | MoNA      | 0.62533 | pos | 1 | 9009642.29 |
| M347T240 | AMP                           | 347.058214  | 239.913 | 347.0631 | 14.0335 | 7P        | C10H14N5O | C00020 | [M]+     | mzCloud   | 0.74375 | pos | 1 | 4659450.52 |
| M348T196 | Ampicillin                    | 348.103438  | 195.791 | 349.1096 | 2.98196 | 4S        | C16H19N3O | C06574 | [M-H]-   | BioDeepDB | 0.62386 | neg | 1 | 3448484.63 |
| M457T433 | Amygdalin                     | 457.170476  | 433.06  | 457.1584 | 26.3915 | 1         | C20H27N01 | C08325 | [M]-     | mzCloud   | 0.004   | neg | 2 | 5280759.19 |
| M145T767 | Anabasine                     | 144.981045  | 766.742 | 162.1157 | 9.28364 | C10H14N2  | C10H14N2  | C06180 | [M+H2O]+ | BioDeepDB | 4E-07   | pos | 2 | 115308357  |
| M348T722 | Anandamide                    | 348.286849  | 722.193 | 347.2824 | 8.11753 | C22H37N02 | C22H37N02 | C11695 | [M+H]+   | mzCloud   | 0.68493 | pos | 1 | 10563898.6 |
| M294T433 | Anastrozole                   | 294.168379  | 433.111 | 293.164  | 9.84808 | C17H19N5  | C17H19N5  | C08159 | [M+H]+   | MoNA      | 0.96204 | pos | 1 | 2439832.51 |
| M257T497 | Ancymidol                     | 257.127975  | 497.214 | 256.1212 | 1.94778 | 2         | C15H16N2O | C18774 | [M+H]+   | mzCloud   | 0.76288 | pos | 1 | 9523641.1  |
| M333T821 | Andrographolide               | 333.202865  | 821.334 | 350.2093 | 2.99751 | C20H30O5  | C20H30O5  | C20214 | [M+H2O]+ | mzCloud   | 0.62433 | pos | 1 | 20123692.8 |
| M267T472 | Androsta-1,4-diene-3,17-dione | 267.169672  | 472.132 | 284.1776 | 1.84773 | C19H24O2  | C19H24O2  | C20144 | [M+H2O]+ | mzCloud   | 0.60623 | pos | 1 | 2510167.89 |
| M287T515 | Androstenedione               | 287.205402  | 514.727 | 286.1933 | 16.8033 | C19H26O2  | C19H26O2  | C00280 | [M+H]+   | mzCloud   | 0.9521  | pos | 1 | 5407841.86 |
| M291T744 | Androsterone                  | 291.194511  | 744.182 | 290.2246 | 6.00037 | C19H30O2  | C19H30O2  | C00523 | [M+H]+   | BioDeepDB | 0.70638 | pos | 1 | 13685011.5 |
| M466T669 | Androsterone                  | 466.262032  | 669.12  | 466.2567 | 11.4357 | C25H38O8  | C25H38O8  | C11135 | [M]-     | mzCloud   | 0.78888 | neg | 1 | 8670054.76 |
| M932T649 | glucuronide                   | 932.1525289 | 649.338 | 930.5076 | 7.4856  | 09        | C46H66N12 | C15848 | [M+H]+   | BioDeepDB | 0.7793  | pos | 1 | 5066168.35 |
| _1       | Angiotensin III               | 931.525289  | 649.338 | 930.5076 | 7.4856  | 09        | C46H66N12 | C15848 | [M+H]+   | BioDeepDB | 0.7793  | pos | 1 | 5066168.35 |
| M94T331  | Aniline                       | 94.0652428  | 330.809 | 93.0578  | 1.7731  | C6H7N     | C6H7N     | C00292 | [M+H]+   | BioDeepDB | 0.00028 | pos | 2 | 13005510   |
| M367T176 | Anilofos                      | 367.020438  | 175.952 | 367.0232 | 7.52555 | 03PS2     | C13H19C1N | C18394 | [M]+     | BioDeepDB | 0.99873 | pos | 1 | 25705188.4 |
| M248T218 | Anisomycin                    | 248.123636  | 217.866 | 265.1314 | 1.32986 | C14H19N04 | C14H19N04 | C11281 | [M+H2O]+ | BioDeepDB | 0.98872 | pos | 1 | 17399644.8 |
| M361T531 | Anisotropine methylbromide    | 361.165186  | 531.127 | 361.1616 | 9.92805 | . Br      | C17H32N02 | C06830 | [M]+     | mzCloud   | 0.84307 | pos | 1 | 6143897.41 |

|          |                       |            |         |          |         |    |           |        |                       |           |         |     |   |            |
|----------|-----------------------|------------|---------|----------|---------|----|-----------|--------|-----------------------|-----------|---------|-----|---|------------|
| M240T167 | Anserine              | 240.12221  | 166.613 | 240.1222 | 0.04318 | 3  | C10H16N4O | C01262 | [M] <sup>+</sup>      | BioDeepDB | 0.57603 | pos | 1 | 410518049  |
| M548T556 |                       |            |         |          |         |    | C28H40N2O |        |                       |           |         |     |   |            |
| _2       | Antimycin A1          | 548.272365 | 555.524 | 548.2734 | 1.8873  | 9  |           | C11339 | [M] <sup>-</sup>      | MoNA      | 0.99028 | neg | 1 | 38096428.8 |
| M189T375 | Antipyrine            | 189.101705 | 375.021 | 188.095  | 2.82477 |    | C11H12N2O | C13244 | [M+H] <sup>+</sup>    | MoNA      | 0.00626 | pos | 2 | 20856768.7 |
| M296T776 | Antirrhine            | 296.192448 | 776.194 | 296.1889 | 11.9783 |    | C19H24N2O | C09033 | [M] <sup>+</sup>      | GNPS      | 0.99991 | pos | 1 | 8689016.59 |
| M269T684 | Apigenin              | 269.04419  | 684.499 | 270.0528 | 4.13317 |    | C15H10O5  | C01477 | [M-H] <sup>-</sup>    | BioDeepDB | 6E-11   | neg | 2 | 3507501.56 |
| M522T743 |                       |            |         |          |         |    | C21H41N5O |        |                       |           |         |     |   |            |
| _2       | Apramycin             | 522.273595 | 742.68  | 539.2803 | 1.39497 | 11 |           | C01555 | [M+H-2O] <sup>+</sup> | MoNA      | 0.98891 | pos | 1 | 40875347.4 |
| M209T372 | Aprobarbital          | 209.091955 | 371.633 | 210.1004 | 5.59065 | 3  | C10H14N2O | C07826 | [M-H] <sup>-</sup>    | MoNA      | 0.95573 | neg | 1 | 1477287.94 |
| M313T791 | Arachidic acid        | 313.235387 | 790.802 | 312.3028 | 4.37957 |    | C20H40O2  | C06425 | [M+H] <sup>+</sup>    | BioDeepDB | 0.66076 | pos | 1 | 56191857.2 |
| M287T813 | Arachidonate          | 287.23597  | 812.862 | 304.2402 | 11.1556 |    | C20H32O2  | C00219 | [M+H-2O] <sup>+</sup> | mzCloud   | 3.7E-12 | pos | 2 | 29498342.8 |
| M271T173 | Arbutin               | 271.08195  | 173.092 | 272.0896 | 1.28983 |    | C12H16O7  | C06186 | [M-H] <sup>-</sup>    | BioDeepDB | 0.62389 | neg | 1 | 1396248.63 |
| M138T577 | Arecoline             | 138.091025 | 577.366 | 155.0946 | 27.7342 |    | C8H13NO2  | C10129 | [M+H-2O] <sup>+</sup> | OTCML     | 1       | pos | 1 | 11089022   |
| M416T829 |                       |            |         |          |         |    |           |        |                       |           |         |     |   |            |
| _2       | Arenobufagin          | 416.217545 | 828.73  | 416.2199 | 5.6305  |    | C24H32O6  | C20035 | [M] <sup>+</sup>      | OTCML     | 0.6896  | pos | 1 | 24322776   |
| M273T90  | Argininosuccinic acid | 273.117124 | 89.6999 | 290.1226 | 7.16861 | 6  | C10H18N4O | C03406 | [M+H-2O] <sup>+</sup> | MoNA      | 0.00011 | pos | 2 | 67471253.7 |
| M447T358 | Aripiprazole          | 447.149924 | 357.958 | 447.148  | 4.30298 |    | N3O2      | C12564 | [M] <sup>+</sup>      | MoNA      | 0.95105 | pos | 1 | 4772483.05 |
| M341T487 | Aristolochic acid     | 341.054035 | 486.885 | 341.0536 | 1.41478 |    | C17H11NO7 | C08469 | [M] <sup>+</sup>      | OTCML     | 0.98897 | pos | 1 | 7460411.15 |
| M107T172 | Aromatic aldehyde     | 107.048821 | 171.935 | 106.0419 | 3.31427 |    | C7H6O     | C00193 | [M+H] <sup>+</sup>    | BioDeepDB | 0.60613 | pos | 1 | 8557257.27 |
| M217T442 | Artemisinic acid      | 217.154565 | 442.005 | 234.162  | 0.08874 |    | C15H22O2  | C20309 | [M+H-2O] <sup>+</sup> | OTCML     | 0.86161 | pos | 1 | 47311546.7 |
| M159T218 | Ascorbate             | 159.02811  | 217.866 | 176.0321 | 21.6546 |    | C6H8O6    | C00072 | [M+H-2O] <sup>+</sup> | BioDeepDB | 2.5E-05 | pos | 2 | 11900793.3 |
| M488T567 | Asiatic acid          | 488.353545 | 567.1   | 488.3502 | 6.84953 |    | C30H48O5  | C08617 | [M] <sup>+</sup>      | mzCloud   | 0.84385 | pos | 1 | 3202946.93 |

|                      |                             |            |         |          |         |                        |        |                       |           |         |     |   |            |
|----------------------|-----------------------------|------------|---------|----------|---------|------------------------|--------|-----------------------|-----------|---------|-----|---|------------|
| M959T651             | Asiaticoside                | 958.514577 | 650.898 | 958.5137 | 0.91523 | C48H78O19              | C15428 | [M] <sup>+</sup>      | MoNA      | 0.7256  | pos | 1 | 2325282.45 |
| M579T728             | Asparagoside A              | 579.385969 | 728.25  | 578.3819 | 5.53477 | C33H54O8<br>C14H18N2O  | C08886 | [M+H] <sup>+</sup>    | MetaDNA   | 0.01531 | pos | 2 | 5360521.51 |
| M277T446<br>M579T583 | Aspartame                   | 277.11478  | 445.984 | 294.1216 | 2.21718 | 5                      | C11045 | [M+H-2H] <sup>+</sup> | mzCloud   | 0.60486 | pos | 1 | 10403638.3 |
| _1                   | Astaxanthin                 | 579.379548 | 583.068 | 596.3866 | 0.65973 | C40H52O4<br>C28H31FN4  | C08580 | [M+H-2H] <sup>+</sup> | BioDeepDB | 0.77545 | pos | 1 | 18840916.6 |
| M441T591             | Astemizole                  | 441.241355 | 590.607 | 458.2482 | 1.33393 | 0                      | C06832 | [M+H-2H] <sup>+</sup> | mzCloud   | 0.61187 | pos | 1 | 16045534.5 |
| M449T511             | Astilbin                    | 449.108381 | 510.673 | 450.1162 | 1.20861 | C21H22O11              | C17449 | [M-H] <sup>-</sup>    | mzCloud   | 0.59052 | neg | 1 | 1315944.38 |
| M447T532             | Astragalinalin              | 447.090971 | 532.372 | 448.1006 | 5.06855 | C21H20O11              | C12249 | [M-H] <sup>-</sup>    | BioDeepDB | 0.01602 | neg | 2 | 2755632.02 |
| M783T778             | Astragaloside III           | 783.438469 | 777.92  | 784.4609 | 16.8888 | C41H68O14              | C08924 | Unknown               | OTCML     | 0.0001  | neg | 2 | 333300.885 |
| M387T396             | Astringin                   | 387.109927 | 396.023 | 406.1264 | 4.99962 | C20H22O9<br>C8H10N2O4  | C10245 | [M-2H-H] <sup>-</sup> | OTCML     | 0.7012  | neg | 1 | 2964870.28 |
| M229T119             | Asulam                      | 229.029129 | 119.413 | 230.0361 | 1.20943 | S                      | C18350 | [M-H] <sup>-</sup>    | MoNA      | 0.98836 | neg | 1 | 342583.802 |
| M202T574             | Asymmetric dimethylarginine | 202.142996 | 574.363 | 202.143  | 0.01971 | C8H18N4O2              | C03626 | [M] <sup>+</sup>      | BioDeepDB | 0.61357 | pos | 1 | 8651780.55 |
| M360T388             | Atalaphylline               | 360.158967 | 388.326 | 379.1784 | 2.89486 | C23H25N04<br>C33H35FN2 | C10645 | [M-2H-H] <sup>-</sup> | GNPS      | 0.99273 | neg | 1 | 1347625.99 |
| M539T418             | Atorvastatin                | 539.232257 | 417.689 | 558.253  | 4.3639  | 05<br>C22H19C10        | C06834 | [M-2H-H] <sup>-</sup> | mzCloud   | 0.63914 | neg | 1 | 7269902.37 |
| M347T450             | Atovaquone                  | 347.076071 | 450.052 | 366.1023 | 22.5872 | 3<br>C10H16N5O         | C06835 | [M-2H-H] <sup>-</sup> | BioDeepDB | 0.99549 | neg | 1 | 609022.697 |
| M507T783             | ATP                         | 507.272233 | 782.558 | 506.9957 | 0.80978 | 13P3                   | C00002 | [M] <sup>+</sup>      | BioDeepDB | 0.68462 | pos | 1 | 1091095.93 |
| M215T161             | Atractylenolide II          | 215.138296 | 161.494 | 232.1463 | 2.78853 | C15H20O2               | C17886 | [M+H-2H] <sup>+</sup> | OTCML     | 0.68602 | pos | 1 | 29530911.7 |
| M231T803             | Atractylenolide III         | 231.135969 | 802.88  | 248.1412 | 9.33885 | C15H20O3               | C17887 | [M+H-2H] <sup>+</sup> | OTCML     | 3.1E-09 | pos | 2 | 36327229.1 |
| M447T600             | Atractyloside A             | 447.226974 | 599.904 | 448.2308 | 7.60833 | C21H36O10              | C17858 | [M-H] <sup>-</sup>    | OTCML     | 7.6E-10 | neg | 2 | 1426616.24 |
| M194T396             | Atraton                     | 194.138816 | 396.415 | 211.1433 | 15.1963 | C9H17N5O               | C19098 | [M+H-2H] <sup>+</sup> | MoNA      | 0.99999 | pos | 1 | 55627864.7 |



|          |                            |            |         |          |         |           |        |                        |           |         |     |   |            |
|----------|----------------------------|------------|---------|----------|---------|-----------|--------|------------------------|-----------|---------|-----|---|------------|
| M216T468 | Atrazine                   | 216.101305 | 467.706 | 215.0938 | 1.05768 | C8H14ClN5 | C06551 | [M+H] <sup>+</sup>     | mzCloud   | 0.59649 | pos | 1 | 2670857.64 |
| M327T361 | Aucubin                    | 327.107472 | 360.831 | 346.1264 | 1.5884  | C15H22O9  | C09771 | [M-H2O-H] <sup>-</sup> | OTCML     | 0.00162 | neg | 2 | 3542170.35 |
| M329T152 | Aurantio-obtusin           | 329.063357 | 152.08  | 330.074  | 8.94277 | C17H14O7  | C17670 | Unknown                | OTCML     | 0.99938 | neg | 1 | 4814832.95 |
| M473T410 | beta-D-glucoside           | 473.105383 | 409.881 | 492.1268 | 6.34732 | C23H24O12 | C10303 | [M-H2O-H] <sup>-</sup> | OTCML     | 0.86309 | neg | 1 | 172089.533 |
| M290T300 | Aurin                      | 290.098132 | 300.176 | 290.0943 | 13.2077 | C19H14O3  | C14213 | [M] <sup>-</sup>       | BioDeepDB | 0.99997 | neg | 1 | 3238324.08 |
| M855T653 | Avermectin Bla             | 855.487932 | 653.147 | 872.4922 | 3.70127 | C48H72O14 | C11983 | [M+H-2H] <sup>+</sup>  | BioDeepDB | 0.99434 | pos | 1 | 3888564.18 |
| M244T203 | Azacitidine                | 244.08057  | 203.36  | 244.0808 | 0.94311 | C8H12N4O5 | C11262 | [M] <sup>+</sup>       | BioDeepDB | 0.59882 | pos | 1 | 20233571.8 |
| M154T235 | Azaserine                  | 154.021252 | 234.972 | 173.0437 | 26.3485 | C5H7N3O4  | C19194 | [M-H2O-H] <sup>-</sup> | MoNA      | 1       | neg | 1 | 1308086.31 |
| M290T803 | Azatadine                  | 290.177401 | 802.88  | 290.1783 | 3.09335 | C20H22N2  | C07774 | [M] <sup>+</sup>       | mzCloud   | 0.66729 | pos | 1 | 2447098.07 |
| M278T239 | Azathioprine               | 278.045863 | 238.605 | 277.0382 | 1.39042 | C9H7N7O2S | C06837 | [M+H] <sup>+</sup>     | GNPS      | 0.59711 | pos | 1 | 4370160.36 |
| M169T504 | Azelaic acid               | 169.085273 | 504.432 | 188.1049 | 7.318   | C9H16O4   | C08261 | [M-H2O-H] <sup>-</sup> | BioDeepDB | 0.00018 | neg | 2 | 7699699.58 |
| M749T791 | Azithromycin               | 749.496326 | 790.802 | 748.5085 | 25.9508 | C22H17N3O | C06838 | [M+H] <sup>+</sup>     | BioDeepDB | 0.84251 | pos | 1 | 3049570.9  |
| M404T358 | Azoxystrobin               | 404.118935 | 357.958 | 403.1168 | 12.7204 | C21H27N3O | C18558 | [M+H] <sup>+</sup>     | mzCloud   | 0.98646 | pos | 1 | 1281676.84 |
| M448T659 | Bacampicillin              | 448.150154 | 658.953 | 465.157  | 1.31314 | C7S       | C08122 | [M+H-2H] <sup>+</sup>  | BioDeepDB | 0.72379 | pos | 1 | 2436242.96 |
| M569T739 | Baccatin III               | 569.241023 | 738.697 | 586.2414 | 12.3965 | C31H38O11 | C11900 | [M+H-2H] <sup>+</sup>  | MoNA      | 0.99993 | pos | 1 | 5855819.07 |
| M323T503 | BADGE                      | 323.159606 | 503.046 | 340.1675 | 1.42339 | C21H24O4  | C14348 | [M+H-2H] <sup>+</sup>  | mzCloud   | 0.75622 | pos | 1 | 3111177.94 |
| M270T108 | Baicalein                  | 270.045669 | 108.082 | 270.0528 | 26.4924 | C15H10O5  | C10023 | [M] <sup>-</sup>       | OTCML     | 0.87607 | neg | 1 | 12800074.2 |
| M418T106 | Barbaloin                  | 418.131648 | 105.503 | 418.1264 | 12.5934 | C21H22O9  | C10305 | [M] <sup>+</sup>       | OTCML     | 0.77386 | pos | 1 | 5953031.89 |
| M501T744 | Beclometasone dipropionate | 501.206004 | 744.192 | 520.2228 | 3.1809  | C28H37ClO | C07813 | [M-H2O-H] <sup>-</sup> | GNPS      | 0.677   | neg | 1 | 727902.16  |

|          |                       |            |         |          |         |           |           |        |            |           |         |     |   |            |
|----------|-----------------------|------------|---------|----------|---------|-----------|-----------|--------|------------|-----------|---------|-----|---|------------|
| M423T480 |                       |            |         |          |         |           | C24H28N2O |        |            |           |         |     |   |            |
| _2       | Benazepril            | 423.185914 | 479.541 | 424.1998 | 15.6198 | 5         | C15H14F3N | C06843 | [M-H]-     | MoNA      | 0.97476 | neg | 1 | 1706498.11 |
| M416T369 | Bendroflumethiazide   | 416.0813   | 368.559 | 421.0378 | 22.3521 | 304S2     | C20H30N2O | C07758 | [M-H]-     | BioDeepDB | 0.99951 | neg | 1 | 2394621.32 |
| M410T537 | Benfuracarb           | 410.188994 | 537.051 | 410.1875 | 3.64225 | 5S        |           | C11073 | [M]-       | MoNA      | 0.99424 | neg | 1 | 13308894.6 |
| M107T770 | Benzaldehyde          | 107.048772 | 769.702 | 106.0419 | 3.06519 | C7H6O     |           | C00261 | [M+H]+     | BioDeepDB | 0.65608 | pos | 1 | 11447409.1 |
| M120T258 | Benzamide             | 120.043876 | 258.208 | 121.0528 | 13.7246 | C7H7NO    |           | C09815 | [M-H]-     | MetaDNA   | 7.3E-05 | neg | 2 | 8840666.24 |
| M121T252 | Benzamidine           | 121.075523 | 251.555 | 120.0687 | 3.73938 | C7H8N2    |           | C01784 | [M+H]+     | MoNA      | 0.99441 | pos | 1 | 1118865.62 |
| M307T776 | Benzatropine          | 307.189137 | 776.194 | 307.1936 | 14.5284 | C21H25NO  |           | C06846 | [M]+       | BioDeepDB | 0.76629 | pos | 1 | 16878802.6 |
| M121T698 | Benzoate              | 121.028376 | 698.034 | 122.0368 | 9.48731 | C7H6O2    |           | C00180 | [M-H]-     | mzCloud   | 0.00095 | neg | 2 | 15576535.8 |
| M166T181 | Benzocaine            | 166.085328 | 181.154 | 165.079  | 5.70494 | C9H11NO2  |           | C07527 | [M+H]+     | mzCloud   | 0.68872 | pos | 1 | 48445308.4 |
| M193T344 | Benzoin               | 193.060527 | 344.233 | 212.0837 | 24.7736 | C14H12O2  |           | C01408 | [M-H2O-H]- | MoNA      | 1       | neg | 1 | 1432512.79 |
| M183T820 | Benzophenone          | 183.079655 | 819.78  | 182.0732 | 4.29449 | C13H10O   |           | C06354 | [M+H]+     | MoNA      | 0.63051 | pos | 1 | 5508975.52 |
| M290T482 | Benzoylecgonine       | 290.138016 | 482.436 | 289.1314 | 2.27472 | C16H19NO4 |           | C10847 | [M+H]+     | mzCloud   | 0.59898 | pos | 1 | 5546351.82 |
| M109T51  | Benzyl alcohol        | 109.064597 | 51.1942 | 108.0575 | 1.64294 | C7H8O     |           | C00556 | [M+H]+     | MoNA      | 0.98962 | pos | 1 | 6350554.62 |
| M211T798 | Benzyl Benzoate       | 211.079222 | 797.757 | 212.0837 | 13.1132 | C14H12O2  |           | C12537 | [M-H]-     | MoNA      | 0.73482 | neg | 1 | 816913.125 |
| M149T274 | Benzyl isothiocyanate | 149.031468 | 273.82  | 149.0299 | 10.5216 | C8H7NS    |           | C03098 | [M]-       | MoNA      | 0.7141  | neg | 1 | 174419.578 |
| M367T666 | Bepriidil             | 367.267691 | 666.137 | 366.2671 | 18.203  | C24H34N2O | C37H40N2O | C06847 | [M+H]+     | mzCloud   | 0.80716 | pos | 1 | 3578035.24 |
| M607T643 | Berbamine             | 607.286325 | 643.166 | 608.2886 | 8.23569 | 6         |           | C09357 | [M-H]-     | MoNA      | 0.9991  | neg | 1 | 5350036.79 |
| M336T626 | Berberine             | 336.119864 | 626.042 | 336.1236 | 9.4322  | C20H18NO4 | C20H18NO4 | C00757 | [M]+       | MoNA      | 2.5E-07 | pos | 2 | 314064779  |
| M370T176 | Berberine chloride    | 370.087084 | 176.104 | 371.0924 | 5.19856 | .Cl       |           | C12679 | [M-H]-     | MoNA      | 0.99664 | neg | 1 | 858820.389 |

|          |                         |            |         |          |         |           |        |            |           |         |     |   |            |
|----------|-------------------------|------------|---------|----------|---------|-----------|--------|------------|-----------|---------|-----|---|------------|
| M185T75  | Bergaptol               | 185.022321 | 74.9588 | 202.0266 | 17.0018 | C11H6O4   | C00758 | [M+H-H2O]+ | OTCML     | 1       | pos | 1 | 24241556   |
| M311T346 | Bergenin                | 311.073005 | 345.848 | 328.0794 | 3.23681 | C14H16O9  | C09919 | [M+H-H2O]+ | OTCML     | 0.67348 | pos | 1 | 56450486   |
| M323T238 | Mannobiose              | 323.099878 | 238.024 | 342.1162 | 6.39943 | C12H22O11 | C21336 | [M-H2O-H]- | MetaDNA   | 0.03302 | neg | 2 | 11129309.1 |
| M90T68_2 | beta-Alanine            | 90.0627052 | 68.0903 | 89.0477  | 9.24256 | C3H7NO2   | C00099 | [M+H]+     | BioDeepDB | 0.00431 | pos | 2 | 2551074.73 |
| M218T78  | beta-Alanyl-L-lysine    | 218.149242 | 78.3841 | 217.1426 | 2.90479 | C9H19N3O3 | C05341 | [M+H]+     | MoNA      | 0.71378 | pos | 1 | 3743558.83 |
| M209T604 | beta-Asarone            | 209.116414 | 603.95  | 208.1099 | 3.64606 | C12H16O3  | C10430 | [M+H]+     | mzCloud   | 0.76964 | pos | 1 | 12006493.1 |
| M169T465 | Beta-Carboline          | 169.075837 | 464.668 | 168.0687 | 0.81981 | C11H8N2   | C20157 | [M+H]+     | MoNA      | 1.6E-08 | pos | 2 | 91502090.7 |
| M180T296 | beta-D-Fructose         | 180.058163 | 295.704 | 180.0634 | 29.0218 | C6H12O6   | C02336 | [M]-       | mzCloud   | 0.10932 | neg | 2 | 3551243.95 |
| M193T704 | beta-D-Glucopyranuronic | 193.032273 | 704.046 | 194.0427 | 16.3244 | C6H10O7   | C08350 | [M-H]-     | mzCloud   | 0.96967 | neg | 1 | 14069509.5 |
| M180T123 | beta-D-Glucosamine      | 180.087033 | 123.262 | 179.0794 | 1.98334 | C6H13NO5  | C08349 | [M+H]+     | mzCloud   | 0.61317 | pos | 1 | 38449452.3 |
| M137T270 | Beta-Geraniol           | 137.132757 | 269.528 | 154.1358 | 1.77332 | C10H18O   | C01500 | [M+H-H2O]+ | BioDeepDB | 0.62298 | pos | 1 | 27221383.9 |
| M112T732 | Beta-Guanidinopropion   | 112.049477 | 731.793 | 131.0695 | 14.5739 | C4H9N3O2  | C03065 | [M-H2O-H]- | BioDeepDB | 0.88669 | neg | 1 | 1594370.89 |
| M735T545 | beta-Hederin            | 735.462762 | 545.203 | 734.4605 | 6.81808 | C41H66O11 | C08955 | [M+H]+     | MetaDNA   | 0.02136 | pos | 2 | 138387576  |
| M325T586 | beta-Lactose            | 325.106926 | 585.968 | 342.1162 | 5.65862 | C12H22O11 | C01970 | [M+H-H2O]+ | BioDeepDB | 8E-06   | pos | 2 | 8777827.79 |
| M325T545 | beta-Maltose            | 325.112002 | 545.203 | 342.1162 | 9.95331 | C12H22O11 | C01971 | [M+H-H2O]+ | mzCloud   | 0.84103 | pos | 1 | 29944260.8 |
| M221T407 | beta-N-Acetylglucosamin | 221.092498 | 406.813 | 221.0899 | 11.7514 | C8H15NO6  | C03878 | [M]-       | BioDeepDB | 0.00387 | neg | 2 | 4641965.17 |
| M205T768 | beta-Selinene           | 205.19453  | 768.166 | 204.1878 | 2.66308 | C15H24    | C09723 | [M+H]+     | BioDeepDB | 0.06729 | pos | 2 | 102981281  |
| M414T838 | beta-Sitosterol         | 414.392472 | 837.524 | 414.3862 | 15.1362 | C29H50O   | C01753 | [M]+       | BioDeepDB | 0.72087 | pos | 1 | 3459709.93 |
| M182T163 | Beta-Tyrosine           | 182.081708 | 162.728 | 181.0739 | 2.7923  | C9H11NO3  | C04368 | [M+H]+     | BioDeepDB | 0.64668 | pos | 1 | 700434718  |

|          |                        |            |         |          |         |           |        |                        |           |         |     |   |            |
|----------|------------------------|------------|---------|----------|---------|-----------|--------|------------------------|-----------|---------|-----|---|------------|
| M118T92  | Betaine                | 118.085307 | 91.7174 | 117.079  | 8.20913 | C5H11NO2  | C00719 | [M+H] <sup>+</sup>     | BioDeepDB | 6.9E-20 | pos | 2 | 2950490801 |
| M85T110  | Betaine aldehyde       | 85.083863  | 110.047 | 102.0919 | 7.08723 | C5H12NO   | C00576 | [M+H-H2O] <sup>+</sup> | BioDeepDB | 0.89385 | pos | 1 | 14367101.2 |
| M391T793 | Betamethasone          | 391.186118 | 793.233 | 392.1999 | 16.6327 | C22H29F05 | C06848 | [M-H] <sup>-</sup>     | BioDeepDB | 0.77107 | neg | 1 | 1402091.23 |
| M290T653 | Betaxolol              | 290.209516 | 653.147 | 307.2147 | 7.75411 | C18H29NO3 | C06849 | [M+H-H2O] <sup>+</sup> | mzCloud   | 0.66003 | pos | 1 | 6237066.78 |
| M161T82  | Bethanechol            | 161.127438 | 82.0569 | 161.129  | 6.59408 | C7H17N2O2 | C06850 | [M+H] <sup>+</sup>     | BioDeepDB | 0.75143 | pos | 1 | 18782365.3 |
| M160T185 | Betonidine             | 160.096253 | 185.398 | 159.0895 | 3.2673  | C7H13NO3  | C08269 | [M+H] <sup>+</sup>     | MoNA      | 0.63438 | pos | 1 | 36538924.4 |
| M443T649 | Betulin                | 443.376557 | 649.338 | 442.3811 | 26.6571 | C30H50O2  | C08618 | [M+H] <sup>+</sup>     | BioDeepDB | 0.00013 | pos | 2 | 213402366  |
| M323T413 | Bialaphos              | 323.122353 | 413.295 | 323.1246 | 6.95352 | C11H22N3O | C06457 | [M] <sup>+</sup>       | mzCloud   | 0.79375 | pos | 1 | 2421208.21 |
| M367T426 | Bicuculline            | 367.099971 | 425.909 | 367.1056 | 15.2976 | C20H17NO6 | C09364 | [M] <sup>+</sup>       | OTCML     | 0.80803 | pos | 1 | 1746716.66 |
| M299T119 | Bifenazate             | 299.135231 | 119.413 | 300.1474 | 16.3321 | C33H34N4O | C18589 | [M-H] <sup>-</sup>     | GNPS      | 1       | neg | 1 | 1799873.01 |
| M583T652 | Biliverdin             | 583.270856 | 651.956 | 582.2478 | 26.4969 | 6         | C00500 | [M+H] <sup>+</sup>     | BioDeepDB | 0.87214 | pos | 1 | 7636731.36 |
| M319T803 | Bilobol                | 319.262717 | 802.88  | 318.2559 | 1.37601 | C21H34O2  | C10770 | [M+H] <sup>+</sup>     | MoNA      | 0.0076  | pos | 2 | 2360886381 |
| M283T772 | Biochanin A            | 283.059337 | 771.785 | 284.0685 | 1.57872 | C16H12O5  | C00814 | [M-H] <sup>-</sup>     | BioDeepDB | 4.8E-09 | neg | 2 | 6937607.6  |
| M532T119 | Biochanin A 7-(6-      | 532.131748 | 119.433 | 532.1217 | 18.8828 | C25H24O13 | C12625 | [M] <sup>+</sup>       | MoNA      | 1       | pos | 1 | 11563331.9 |
| M373T519 | Biocytin               | 373.191134 | 519.257 | 372.1831 | 2.03    | C16H28N4O | C05552 | [M+H] <sup>+</sup>     | mzCloud   | 0.65657 | pos | 1 | 821300.442 |
| M237T160 | Biopterin              | 237.086339 | 160.369 | 237.0862 | 0.58799 | C9H11N5O3 | C06313 | [M] <sup>+</sup>       | mzCloud   | 0.61893 | pos | 1 | 8143955.38 |
| M339T418 | Bioresmethrin          | 339.191066 | 417.676 | 338.1882 | 13.0018 | C22H26O3  | C16810 | [M+H] <sup>+</sup>     | mzCloud   | 0.91652 | pos | 1 | 6028079.88 |
| M227T466 | Biotin                 | 227.080041 | 466.162 | 244.0882 | 3.19361 | C10H16N2O | C00120 | [M+H-H2O] <sup>+</sup> | MoNA      | 4.3E-06 | pos | 2 | 10796507.7 |
| M390T620 | Bis(2-ethylhexyl)phtha | 390.281371 | 620.172 | 390.277  | 11.1751 | C24H38O4  | C03690 | [M] <sup>+</sup>       | mzCloud   | 0.81199 | pos | 1 | 10946502.4 |

|            |                 |            |         |          |         |                        |        |              |           |         |     |   |            |
|------------|-----------------|------------|---------|----------|---------|------------------------|--------|--------------|-----------|---------|-----|---|------------|
| M211T379   | Bisphenol A     | 211.107212 | 379.194 | 228.115  | 1.67768 | C15H16O2<br>C20H23N3O  | C13624 | [M+H-20]+    | MoNA      | 0.91892 | pos | 1 | 19370298   |
| M320T423   | Bitertanol      | 320.169234 | 423.199 | 337.179  | 7.28512 | 2                      | C11258 | [M+H-20]+    | mzCloud   | 0.96115 | pos | 1 | 15882037.5 |
| M86T649    | Biuret          | 86.0313723 | 649.338 | 103.0382 | 7.04694 | C2H5N3O2<br>C17H26N8O  | C06555 | [M+H-20]+    | MoNA      | 0.99842 | pos | 1 | 9009462.3  |
| M422T496   | Blasticidin S   | 422.201395 | 495.779 | 422.2026 | 2.85415 | 5                      | C02010 | [M]+         | MoNA      | 0.81112 | pos | 1 | 1197662.67 |
| M310T316   | Boldine         | 310.138446 | 315.701 | 327.1471 | 3.79778 | C19H21N04<br>C18H12C12 | C09365 | [M+H-20]+    | OTCML     | 0.68306 | pos | 1 | 10880217.1 |
| M341T90    | Boscalid        | 341.025244 | 89.8937 | 342.0327 | 0.4354  | N20                    | C18547 | [M-H]-       | MoNA      | 0.98588 | neg | 1 | 13784894.9 |
| M279T795   | Bovinic acid    | 279.230041 | 794.753 | 280.2402 | 10.3255 | C18H32O2               | C04056 | [M-H]-       | BioDeepDB | 2.7E-08 | neg | 2 | 12702913   |
| M100T65_2  | Bovinicidin     | 100.002487 | 65.0166 | 119.0219 | 10.2282 | C3H5N04                | C05669 | [M-H20-H]-   | BioDeepDB | 0.80423 | neg | 1 | 1873597.66 |
| M480T767   | Brassinolide    | 480.354632 | 766.742 | 480.3451 | 19.8434 | C28H48O6<br>C9H13BrN2  | C11049 | [M]+         | BioDeepDB | 0.81988 | pos | 1 | 3408757.65 |
| M260T75    | Bromacil        | 260.009151 | 74.9588 | 260.016  | 26.3408 | O2<br>C30H23BrO        | C10911 | [M]+         | MoNA      | 1       | pos | 1 | 12912694.5 |
| M526T508   | Bromadiolone    | 526.078249 | 507.55  | 526.078  | 0.47345 | 4<br>C32H40BrN         | C18596 | [M]-         | MoNA      | 0.98601 | neg | 1 | 1229829.63 |
| M634T205   | Bromocriptine   | 634.198378 | 204.895 | 653.2213 | 7.14536 | 505<br>C16H19BrN       | C06856 | [M-H20-H]-   | mzCloud   | 0.7909  | neg | 1 | 1597311.26 |
| M319T445   | Brompheniramine | 319.083299 | 444.725 | 318.0732 | 8.84773 | 2<br>C23H26N2O         | C06857 | [M+H]+       | GNPS      | 0.95062 | pos | 1 | 3316218.35 |
| M393T583   | Brucine         | 393.18168  | 582.96  | 394.1893 | 0.76754 | 4                      | C09084 | [M-H]-       | GNPS      | 0.98698 | neg | 1 | 1365113.75 |
| M904T566_3 | Bryostatin 1    | 904.464292 | 565.79  | 904.4457 | 2.46722 | C47H68O17              | C05149 | [M-H20+NH4]+ | BioDeepDB | 0.99175 | pos | 1 | 10300888.4 |
| M314T432   | Bucharaine      | 314.171164 | 431.64  | 331.1784 | 0.63002 | C19H25N04              | C10649 | [M+H-20]+    | MoNA      | 0.98653 | pos | 1 | 411941624  |
| M205T350   | Bufotenine      | 205.133246 | 349.911 | 204.1263 | 1.60824 | C12H16N2O              | C08299 | [M+H]+       | mzCloud   | 0.59137 | pos | 1 | 6101669.15 |
| M468T811   | Buprenorphine   | 468.311493 | 811.413 | 467.3036 | 1.31805 | C29H41N04<br>C16H23N3O | C08007 | [M+H]+       | MoNA      | 0.60779 | pos | 1 | 3376087.77 |
| M305T503   | Buprofezin      | 305.149106 | 503.046 | 305.1562 | 23.1919 | S                      | C10912 | [M]+         | mzCloud   | 0.99343 | pos | 1 | 17494465.1 |

|          |                          |            |         |          |         |   |                        |        |                       |           |         |     |   |            |
|----------|--------------------------|------------|---------|----------|---------|---|------------------------|--------|-----------------------|-----------|---------|-----|---|------------|
| M240T660 | Bupropion                | 240.122098 | 660.455 | 239.1077 | 29.5606 | 0 | C13H18C1N              | C06860 | [M+H] <sup>+</sup>    | BioDeepDB | 0.94428 | pos | 1 | 9354485.82 |
| M195T533 | Butobarbital             | 195.111706 | 532.526 | 212.1161 | 15.5811 | 3 | C10H16N2O              | C07827 | [M+H-20] <sup>+</sup> | BioDeepDB | 0.95323 | pos | 1 | 10562628.2 |
| M194T62  | Butamben                 | 194.116767 | 62.1777 | 193.1103 | 4.16557 |   | C11H15N02              | C07875 | [M+H] <sup>+</sup>    | mzCloud   | 0.64686 | pos | 1 | 2538664.29 |
| M218T332 | Butylate                 | 218.156981 | 332.2   | 217.15   | 1.35401 |   | C11H23N0S              | C14323 | [M+H] <sup>+</sup>    | mzCloud   | 0.98879 | pos | 1 | 5284463.18 |
| M89T63_2 | Butyric acid             | 89.1073667 | 63.4448 | 88.0524  | 2.8451  |   | C4H8O2                 | C00246 | [M+H] <sup>+</sup>    | BioDeepDB | 5.7E-21 | pos | 2 | 12282527.8 |
| M232T432 | Butyrylcarnitine         | 232.153891 | 431.64  | 231.1471 | 2.09025 |   | C11H21N04<br>C15H22N4O | C02862 | [M+H] <sup>+</sup>    | BioDeepDB | 0.60064 | pos | 1 | 2985352.05 |
| M289T367 | Bz-Arg-OEt               | 289.163132 | 366.514 | 306.1692 | 4.72398 | 3 |                        | C01670 | [M+H-20] <sup>+</sup> | mzCloud   | 0.63074 | pos | 1 | 924208.46  |
| M103T76  | Cadaverine               | 103.122606 | 76.0874 | 102.1157 | 3.58313 |   | C5H14N2                | C01672 | [M+H] <sup>+</sup>    | BioDeepDB | 0.00227 | pos | 2 | 12472483.7 |
| M316T832 | Cafestol                 | 316.199917 | 831.709 | 316.2038 | 12.2812 |   | C20H28O3               | C09066 | [M] <sup>+</sup>      | mzCloud   | 0.72823 | pos | 1 | 1508595.62 |
| M180T711 | Caffeate                 | 180.043316 | 710.534 | 180.0423 | 5.6435  |   | C9H8O4                 | C01197 | [M] <sup>+</sup>      | BioDeepDB | 7.5E-06 | pos | 2 | 50785684.2 |
| M193T375 | Caffeine                 | 193.068998 | 374.746 | 194.0804 | 21.3731 |   | C8H10N4O2<br>C29H37N3O | C07481 | [M-H] <sup>-</sup>    | mzCloud   | 0.07333 | neg | 2 | 753120.085 |
| M504T551 | Calcimycin               | 504.242534 | 550.932 | 523.2682 | 14.4302 | 6 |                        | C11309 | [M-20-H] <sup>-</sup> | BioDeepDB | 0.99999 | neg | 1 | 649607.952 |
| M399T555 | Calcitriol               | 399.325363 | 555.358 | 416.329  | 2.34571 |   | C27H44O3<br>(C9H16N05  | C01673 | [M+H-20] <sup>+</sup> | BioDeepDB | 0.81641 | pos | 1 | 5485058.63 |
| M476T514 | Calcium<br>pantothenate  | 476.171641 | 513.768 | 476.1683 | 7.01698 |   | )2. Ca<br>C20H16N2O    | C12276 | [M] <sup>-</sup>      | MoNA      | 0.9984  | neg | 1 | 609220.992 |
| M331T320 | Camptothecin             | 331.10035  | 319.758 | 348.111  | 9.71267 | 4 |                        | C01897 | [M+H-20] <sup>+</sup> | mzCloud   | 0.88233 | pos | 1 | 2288134.28 |
| M159T367 | Canavanine               | 159.084005 | 366.514 | 176.0909 | 3.38726 |   | C5H12N4O3<br>C24H20N6O | C00308 | [M+H-20] <sup>+</sup> | mzCloud   | 0.66998 | pos | 1 | 3551952.43 |
| M439T687 | Candesartan              | 439.151145 | 687.214 | 440.1597 | 2.88678 | 3 |                        | C07468 | [M-H] <sup>-</sup>    | MoNA      | 0.71895 | neg | 1 | 448084.438 |
| M591T810 | Candesartan<br>cilexetil | 591.235226 | 809.797 | 610.254  | 0.64875 | 6 | C33H34N6O              | C07709 | [M-20-H] <sup>-</sup> | BioDeepDB | 0.9866  | neg | 1 | 2922891.19 |
| M358T512 | Cannabidiolic<br>acid    | 358.214009 | 511.77  | 358.2144 | 1.09047 |   | C22H30O4               | C10784 | [M] <sup>+</sup>      | mzCloud   | 0.88845 | pos | 1 | 5198932.89 |

|          |                            |            |         |          |         |                        |        |                        |           |         |     |   |            |
|----------|----------------------------|------------|---------|----------|---------|------------------------|--------|------------------------|-----------|---------|-----|---|------------|
| M361T762 | Cannabigerolate            | 361.233405 | 762.439 | 360.2301 | 10.9916 | C22H32O4               | C20406 | [M+H] <sup>+</sup>     | mzCloud   | 0.83333 | pos | 1 | 5317104.55 |
| M310T320 | Cannabinol                 | 310.18654  | 319.758 | 310.1933 | 21.73   | C21H26O2               | C07580 | [M] <sup>+</sup>       | mzCloud   | 0.92413 | pos | 1 | 6457454.69 |
| M197T487 | Cantharidin                | 197.080186 | 486.885 | 196.0736 | 3.29403 | C10H12O4               | C16778 | [M+H] <sup>+</sup>     | OTCML     | 0.10768 | pos | 2 | 21616206.2 |
| M564T530 | Canthaxanthin              | 564.393993 | 529.713 | 564.3967 | 4.79649 | C40H52O2<br>C15H22FN3  | C08583 | [M] <sup>+</sup>       | BioDeepDB | 0.8631  | pos | 1 | 1495605.68 |
| M359T712 | Capecitabine               | 359.149954 | 711.794 | 359.1493 | 1.8219  | O6                     | C12650 | [M] <sup>-</sup>       | GNPS      | 0.6878  | neg | 1 | 557887.844 |
| M171T819 | Capric acid                | 171.137772 | 818.743 | 172.1463 | 7.31392 | C10H20O2               | C01571 | [M-H] <sup>-</sup>     | BioDeepDB | 0.66098 | neg | 1 | 1927210.52 |
| M115T835 | Caproic acid               | 114.932982 | 835.329 | 116.0837 | 0.14688 | C6H12O2                | C01585 | [M-H] <sup>-</sup>     | BioDeepDB | 0.60614 | neg | 1 | 3561857.85 |
| M125T370 | Caprylic acid              | 125.095665 | 370.115 | 144.115  | 7.55194 | C8H16O2                | C06423 | [M-H2O-H] <sup>-</sup> | BioDeepDB | 0.00057 | neg | 2 | 2379866.08 |
| M306T833 | Capsaicin                  | 306.205743 | 833.029 | 305.1991 | 2.0458  | C18H27NO3              | C06866 | [M+H] <sup>+</sup>     | MoNA      | 0.59934 | pos | 1 | 4441827.95 |
| M585T562 | Capsanthin                 | 585.420884 | 561.955 | 584.4229 | 15.8726 | C40H56O3<br>C23H28N2O  | C08584 | [M+H] <sup>+</sup>     | MoNA      | 0.93962 | pos | 1 | 75554202.6 |
| M428T708 | Carapanaubine              | 428.19245  | 707.557 | 428.1947 | 5.25472 | 6                      | C09106 | [M] <sup>+</sup>       | GNPS      | 0.99671 | pos | 1 | 4279881.6  |
| M219T226 | Carbamazepine<br>Carbamoyl | 219.085615 | 226.202 | 236.095  | 8.90363 | C15H12N2O              | C06868 | [M+H-2O] <sup>+</sup>  | mzCloud   | 0.71623 | pos | 1 | 6707510.42 |
| M141T34  | phosphate                  | 140.984671 | 34.4117 | 140.9827 | 13.9804 | CH4NO5P                | C00169 | [M] <sup>-</sup>       | BioDeepDB | 0.86517 | neg | 1 | 4871437    |
| M191T449 | Carbendazim                | 191.069835 | 448.978 | 191.0695 | 1.753   | C9H9N3O2<br>C12H16N2O  | C10897 | [M] <sup>+</sup>       | mzCloud   | 0.6089  | pos | 1 | 2033816.64 |
| M236T421 | Carbetamide                | 236.122724 | 420.799 | 236.1161 | 28.0545 | 3<br>C7H10N2O2         | C11075 | [M] <sup>-</sup>       | MoNA      | 1       | neg | 1 | 175967.857 |
| M187T203 | Carbimazole                | 187.049023 | 203.36  | 186.0463 | 24.335  | S                      | C07615 | [M+H] <sup>+</sup>     | GNPS      | 0.81014 | pos | 1 | 1287540.8  |
| M222T318 | Carbofuran                 | 222.109965 | 318.497 | 221.1052 | 11.3065 | C12H15NO3<br>C12H13NO2 | C14291 | [M+H] <sup>+</sup>     | mzCloud   | 0.83157 | pos | 1 | 6991831.03 |
| M216T104 | Carboxin                   | 216.050392 | 104.493 | 235.0667 | 9.63561 | S                      | C11255 | [M-H2O-H] <sup>-</sup> | BioDeepDB | 0.99958 | neg | 1 | 6393562.23 |
| M191T144 | Carglumic acid             | 191.065705 | 143.959 | 190.059  | 2.59077 | C6H10N2O5              | C05829 | [M+H] <sup>+</sup>     | BioDeepDB | 0.65892 | pos | 1 | 9681801.33 |

|                      |                             |            |         |          |         |                       |        |            |           |         |     |   |            |
|----------------------|-----------------------------|------------|---------|----------|---------|-----------------------|--------|------------|-----------|---------|-----|---|------------|
| M243T429             | Carisoprodol                | 243.166521 | 428.735 | 260.1736 | 1.45914 | C12H24N2O<br>4        | C07927 | [M+H-H2O]+ | MoNA      | 0.89079 | pos | 1 | 30986674.7 |
| M196T66              | Carmustine                  | 195.994156 | 65.7101 | 213.0072 | 28.6228 | C5H9C12N3<br>02       | C06873 | [M+H-H2O]+ | BioDeepDB | 0.93017 | pos | 1 | 33857640   |
| M226T102             | Carnosine                   | 226.106657 | 102.247 | 226.1066 | 0.25079 | C9H14N4O3             | C00386 | [M]+       | BioDeepDB | 0.58975 | pos | 1 | 173053899  |
| M311T793             | Carnosol                    | 311.166343 | 793.233 | 330.1831 | 5.2466  | C20H26O4<br>C15H12C1N | C09069 | [M-H2O-H]- | BioDeepDB | 0.66013 | neg | 1 | 12338855.3 |
| M272T381             | Carprofen                   | 272.040585 | 380.608 | 273.0557 | 28.7274 | 02<br>C24H26N2O       | C18364 | [M-H]-     | BioDeepDB | 0.9998  | neg | 1 | 2267730.92 |
| M406T662             | Carvedilol<br>Caryophyllene | 406.191885 | 661.979 | 406.1893 | 6.36462 | 4                     | C06875 | [M]+       | mzCloud   | 0.68145 | pos | 1 | 1414962.45 |
| M221T545<br>M901T206 | epoxide                     | 221.189597 | 545.203 | 220.1827 | 1.71405 | C15H24O               | C16908 | [M+H]+     | mzCloud   | 1.1E-11 | pos | 2 | 31327499.2 |
| _1<br>M289T433       | Cassiaside B2               | 901.277265 | 206.399 | 920.2798 | 17.5916 | C39H52O25             | C17674 | [M-H2O-H]- | GNPS      | 1       | neg | 1 | 349304.264 |
| _2<br>M109T136       | Catechin                    | 289.072028 | 433.06  | 290.079  | 0.79038 | C15H14O6              | C06562 | [M-H]-     | BioDeepDB | 0.58243 | neg | 1 | 480541.529 |
| _1                   | Catechol                    | 109.027163 | 135.795 | 110.0368 | 21.6588 | C6H6O2<br>C9H15N3O1   | C00090 | [M-H]-     | MetaDNA   | 0.04544 | neg | 2 | 9252637.17 |
| M404T164             | CDP                         | 404.030619 | 163.846 | 403.0182 | 11.0635 | 1P2<br>C15H14C1N      | C00112 | [M+H]+     | BioDeepDB | 0.68109 | pos | 1 | 29965395.2 |
| M366T68              | Cefaclor                    | 366.038871 | 67.6441 | 367.0394 | 18.4324 | 304S<br>C16H17N3O     | C06877 | [M-H]-     | MoNA      | 1       | neg | 1 | 319948.68  |
| M362T240<br>M377T835 | Cefadroxil                  | 362.082298 | 239.574 | 363.0889 | 1.86094 | 5S<br>C16H16N2O       | C06878 | [M-H]-     | BioDeepDB | 0.60223 | neg | 1 | 245051.884 |
| _1                   | Cefalotin                   | 377.029884 | 835.329 | 396.045  | 8.6848  | 6S2<br>C14H13N5O      | C07761 | [M-H2O-H]- | BioDeepDB | 0.66149 | neg | 1 | 544748.434 |
| M378T279             | Cefdinir                    | 378.022441 | 279.039 | 395.0358 | 15.6725 | 5S2<br>C18H19N3O      | C08110 | [M+H-H2O]+ | GNPS      | 0.76772 | pos | 1 | 8741803.41 |
| M372T59              | Cefprozil                   | 372.099247 | 58.6151 | 389.1045 | 5.86245 | 5S<br>C16H19N3O       | C06888 | [M+H-H2O]+ | GNPS      | 0.7627  | pos | 1 | 4754235.83 |
| M348T291<br>M527T68_ | Cefradine                   | 348.101489 | 291.076 | 349.1096 | 2.39802 | 4S<br>C22H22N6O       | C06897 | [M-H]-     | BioDeepDB | 0.64522 | neg | 1 | 3064433.19 |
| 1                    | Ceftazidime                 | 527.084226 | 67.6441 | 546.0991 | 6.67017 | 7S2<br>C15H14N4O      | C06889 | [M-H2O-H]- | MoNA      | 0.76409 | neg | 1 | 9605992.2  |
| M393T211             | Ceftibuten                  | 393.030604 | 211.288 | 410.0355 | 6.45826 | 6S2                   | C08117 | [M+H-H2O]+ | BioDeepDB | 0.64626 | pos | 1 | 3005921.67 |



|          |                                    |            |         |          |         |                        |        |            |           |         |     |   |            |  |  |  |  |  |
|----------|------------------------------------|------------|---------|----------|---------|------------------------|--------|------------|-----------|---------|-----|---|------------|--|--|--|--|--|
| M423T428 |                                    |            |         |          |         |                        |        | C16H16N4O  |           |         |     |   |            |  |  |  |  |  |
| _1       | Cefuroxime                         | 423.062714 | 428.448 | 424.0689 | 2.57673 | 8S                     | C06894 | [M-H]-     | BioDeepDB | 0.75509 | neg | 1 | 271198.621 |  |  |  |  |  |
| M381T651 | Celecoxib                          | 381.074749 | 650.898 | 381.0759 | 3.02035 | C17H14F3N<br>302S      | C07589 | [M]+       | MoNA      | 0.74965 | pos | 1 | 20809524.7 |  |  |  |  |  |
| M323T106 | Cellobiose                         | 323.096121 | 105.537 | 342.1162 | 5.22893 | C12H22O11              | C00185 | [M-H2O-H]- | BioDeepDB | 2.5E-08 | neg | 2 | 151256182  |  |  |  |  |  |
| M973T99  | Cellohexaose                       | 973.298763 | 98.9918 | 990.3275 | 21.8868 | C36H62O31              | C06217 | [M+H2O]+   | MetaDNA   | 0.02543 | pos | 2 | 13775037.3 |  |  |  |  |  |
| M828T258 | Cellopentaose                      | 828.276775 | 258.489 | 828.2747 | 2.50542 | C30H52O26              | C06218 | [M]+       | MetaDNA   | 0.05851 | pos | 2 | 1318283.77 |  |  |  |  |  |
| M649T291 | Cellotetraose                      | 649.231067 | 291.307 | 666.2219 | 25.5705 | C24H42O21<br>C16H17N3O | C02013 | [M+H2O]+   | MetaDNA   | 0.02737 | pos | 2 | 68442839.7 |  |  |  |  |  |
| M347T209 | Cephalexin                         | 347.095033 | 208.905 | 347.094  | 2.97568 | 4S                     | C06895 | [M]+       | MoNA      | 0.61423 | pos | 1 | 18430592.6 |  |  |  |  |  |
| M398T371 | Cephalosporin C                    | 398.104655 | 370.777 | 415.1049 | 18.0569 | C16H21N3O<br>8S        | C00916 | [M+H2O]+   | BioDeepDB | 0.99799 | pos | 1 | 1075166.26 |  |  |  |  |  |
| M406T767 | Cephapirin                         | 406.054073 | 766.742 | 423.0559 | 13.8073 | 6S2<br>C37H38N2O       | C06896 | [M+H2O]+   | BioDeepDB | 0.76746 | pos | 1 | 5905208.62 |  |  |  |  |  |
| M589T803 | Cepharanthine                      | 589.268123 | 802.88  | 606.273  | 4.36198 | 6<br>C26H34FNO         | C09391 | [M+H2O]+   | OTCML     | 0.69992 | pos | 1 | 5030476.43 |  |  |  |  |  |
| M459T805 | Cerivastatin                       | 459.242718 | 805.145 | 459.2421 | 1.34479 | 5                      | C07966 | [M]-       | MoNA      | 0.98877 | neg | 1 | 1081124.13 |  |  |  |  |  |
| M224T194 | Cerulenin                          | 224.127515 | 193.823 | 223.1208 | 2.50367 | C12H17N03<br>C21H25C1N | C12058 | [M+H]+     | BioDeepDB | 0.62065 | pos | 1 | 5632656.97 |  |  |  |  |  |
| M371T597 | Cetirizine                         | 371.147215 | 596.628 | 388.1554 | 2.02395 | 203                    | C07778 | [M+H2O]+   | mzCloud   | 0.60573 | pos | 1 | 6135770.33 |  |  |  |  |  |
| M304T234 | Cetraxate                          | 304.150912 | 233.519 | 305.1627 | 14.8333 | C17H23N04<br>C19H42N.  | C01564 | [M-H]-     | MoNA      | 0.99999 | neg | 1 | 2522540.74 |  |  |  |  |  |
| M346T614 | Cetyltrimethylam<br>monium bromide | 346.236836 | 614.215 | 363.2501 | 16.8396 | Br                     | C11275 | [M+H2O]+   | mzCloud   | 0.91117 | pos | 1 | 1078133.33 |  |  |  |  |  |
| M273T427 | Chalconaringenin                   | 273.074753 | 427.362 | 272.0685 | 3.65061 | C15H12O5               | C06561 | [M+H]+     | MoNA      | 4.1E-08 | pos | 2 | 27243540   |  |  |  |  |  |
| M135T810 | Chavicol                           | 135.080065 | 810.052 | 134.0732 | 2.47688 | C9H10O<br>C21H18NO4    | C16930 | [M+H]+     | BioDeepDB | 0.61997 | pos | 1 | 4743502.44 |  |  |  |  |  |
| M349T388 | Chelerythrine                      | 349.138657 | 387.763 | 348.1236 | 22.3342 | +                      | C12227 | [M+H]+     | OTCML     | 0.99963 | pos | 1 | 13893743.3 |  |  |  |  |  |
| M353T309 | Chelidonine                        | 353.132956 | 308.967 | 353.1263 | 18.783  | C20H19NO5              | C12242 | [M]+       | OTCML     | 0.98054 | pos | 1 | 3338918.05 |  |  |  |  |  |

|          |                         |            |         |          |         |                                |        |                        |           |         |       |   |            |
|----------|-------------------------|------------|---------|----------|---------|--------------------------------|--------|------------------------|-----------|---------|-------|---|------------|
| M393T448 | Chenodeoxycholic acid   | 393.206694 | 447.531 | 392.2927 | 4.19376 | C24H40O4                       | C02528 | [M+H] <sup>+</sup>     | BioDeepDB | 0.61638 | pos   | 1 | 5665599.84 |
| M457T753 |                         |            |         |          |         |                                |        |                        |           |         |       |   |            |
| _2       | Chicoric acid           | 457.073558 | 752.541 | 474.0798 | 2.60816 | C22H18O12<br>C16H28N2O         | C10437 | [M+H-H2O] <sup>+</sup> | mzCloud   | 0.65115 | pos   | 1 | 12526359.3 |
| M405T535 | Chitobiose              | 405.151862 | 535.488 | 424.1693 | 2.34901 | 11<br>C14H19C12                | C01674 | [M-H2O-H] <sup>-</sup> | BioDeepDB | 0.60831 | neg   | 1 | 3987353.2  |
| M304T477 | Chlorambucil            | 304.087452 | 476.554 | 303.0793 | 2.80056 | N02                            | C06900 | [M+H] <sup>+</sup>     | BioDeepDB | 0.87663 | pos   | 1 | 557671.192 |
| M268T290 | Chloraminophenamide     | 267.961388 | 289.912 | 284.9645 | 16.1303 | C6H8C1N3O<br>4S2<br>C11H12C12  | C07460 | [M+H-H2O] <sup>+</sup> | MoNA      |         | 1 pos | 1 | 6153349.05 |
| M323T741 | Chloramphenicol         | 323.027421 | 741.302 | 322.0123 | 24.2033 | N2O5<br>C16H14C1N              | C00918 | [M+H] <sup>+</sup>     | MoNA      | 0.86983 | pos   | 1 | 1201667.82 |
| M298T160 | Chlordiazepoxide        | 298.076762 | 159.635 | 299.0825 | 5.02775 | 30                             | C06901 | [M-H] <sup>-</sup>     | MoNA      | 0.99642 | neg   | 1 | 4147021.81 |
| M877T172 | Chlorhexidine gluconate | 877.293135 | 171.546 | 896.3198 | 9.43284 | C22H30C12<br>N1O.<br>C10H8C1N3 | C08038 | [M-H2O-H] <sup>-</sup> | mzCloud   | 0.66476 | neg   | 1 | 1225948.18 |
| M202T89  | Chloridazon             | 202.019705 | 88.8247 | 221.0356 | 12.3506 | 0                              | C18570 | [M-H2O-H] <sup>-</sup> | BioDeepDB | 0.99993 | neg   | 1 | 2143429.34 |
| M387T456 | Chlormadinone acetate   | 387.167683 | 456.126 | 404.1754 | 0.73204 | 4<br>C23H29C1O                 | C12729 | [M+H-H2O] <sup>+</sup> | mzCloud   | 0.71917 | pos   | 1 | 2985508.52 |
| M355T427 | Chlorogenic acid        | 355.100777 | 427.362 | 354.0951 | 4.45299 | C16H18O9<br>C18H26C1N          | C00852 | [M+H] <sup>+</sup>     | OTCML     | 5.7E-10 | pos   | 2 | 40945586.4 |
| M302T818 | Chloroquine             | 302.174363 | 818.418 | 319.1815 | 0.98374 | 3<br>C10H13C1N                 | C07625 | [M+H-H2O] <sup>+</sup> | BioDeepDB | 0.59963 | pos   | 1 | 10055268.7 |
| M212T179 | Chlorotoluron           | 212.074473 | 179.046 | 212.0716 | 13.5481 | 20<br>C16H19C1N                | C18817 | [M] <sup>-</sup>       | BioDeepDB | 0.99997 | neg   | 1 | 1316882.61 |
| M257T393 | Chlorpheniramine        | 257.119629 | 392.715 | 274.1237 | 13.0801 | 2<br>C17H19C1N                 | C06905 | [M+H-H2O] <sup>+</sup> | GNPS      | 0.98772 | pos   | 1 | 72129188.3 |
| M319T124 | Chlorpromazine          | 319.101823 | 124.487 | 318.0957 | 3.61293 | 2S<br>C18H18C1N                | C06906 | [M+H] <sup>+</sup>     | mzCloud   | 0.68494 | pos   | 1 | 5853641.6  |
| M316T802 | Chlorprothixene         | 316.08587  | 801.685 | 315.0848 | 19.6337 | S<br>C9H11C13N                 | C07953 | [M+H] <sup>+</sup>     | BioDeepDB | 0.78942 | pos   | 1 | 795341.927 |
| M332T66  | Chlorpyrifos            | 331.914648 | 65.7101 | 348.9263 | 12.7073 | O3PS<br>C22H23C1N              | C14322 | [M+H-H2O] <sup>+</sup> | MoNA      | 0.82843 | pos   | 1 | 1460902.03 |
| M478T196 | Chlortetracycline       | 478.127569 | 195.791 | 478.1143 | 27.7525 | 208<br>C14H11C1N               | C06571 | [M] <sup>-</sup>       | MoNA      |         | 1 neg | 1 | 810498.408 |
| M319T78  | Chlorthalidone          | 318.996341 | 78.2661 | 338.0128 | 6.03579 | 2O4S                           | C06908 | [M-H2O-H] <sup>-</sup> | BioDeepDB | 0.99757 | neg   | 1 | 3510333.43 |

|            |                                      |            |         |          |         |                       |        |            |           |         |     |   |            |
|------------|--------------------------------------|------------|---------|----------|---------|-----------------------|--------|------------|-----------|---------|-----|---|------------|
| M150T274   | Chlorzoxazone                        | 149.975495 | 273.82  | 168.9931 | 5.23726 | C7H4C1N02             | C07931 | [M-H2O-H]- | BioDeepDB | 0.99669 | neg | 1 | 1743264.51 |
| M367T703   | Cholest-4-en-3-one                   | 367.333614 | 703.35  | 384.3392 | 5.03135 | C27H44O               | C00599 | [M+H2O]+   | mzCloud   | 0.64883 | pos | 1 | 10172370.1 |
| M104T32    | Choline                              | 104.106591 | 32.4171 | 104.1075 | 2.11368 | C5H14NO               | C00114 | [M+H]+     | BioDeepDB | 2E-12   | pos | 2 | 67118498.3 |
| M227T284   | Chorismate                           | 227.054738 | 284.377 | 226.0477 | 1.04976 | C10H10O6              | C00251 | [M+H]+     | MoNA      | 0.62671 | pos | 1 | 7528193.58 |
| M254T317_1 | Chrysin                              | 254.065176 | 317.199 | 254.0579 | 28.6044 | C15H10O4              | C10028 | [M]+       | mzCloud   | 0.98698 | pos | 1 | 2952717.07 |
| M355T82    | Chrysosplenetin                      | 355.08596  | 81.8855 | 374.1002 | 11.7776 | C19H18O8<br>C16H26N2O | C10030 | [M-H2O-H]- | OTCML     | 0.9999  | neg | 1 | 22607313.1 |
| M358T93    | Cilastatin                           | 358.157885 | 92.7272 | 358.1562 | 4.70451 | 5S                    | C01675 | [M]+       | MoNA      | 0.72204 | pos | 1 | 14718726.2 |
| M126T211   | Ciliatine                            | 126.066453 | 211.288 | 125.0242 | 29.0397 | C2H8NO3P              | C03557 | [M+H]+     | BioDeepDB | 0.00075 | pos | 2 | 41156968.1 |
| M253T161   | Cimetidine                           | 253.121283 | 161.494 | 252.1157 | 6.68692 | C10H16N6S             | C06952 | [M+H]+     | MoNA      | 0.68753 | pos | 1 | 20943523.8 |
| M293T710   | Cinchonidine                         | 293.173358 | 710.246 | 294.1732 | 25.3099 | C19H22N2O             | C11379 | [M-H]-     | MoNA      | 0.0433  | neg | 2 | 8597749.14 |
| M133T433   | Cinnamaldehyde                       | 133.064563 | 433.111 | 132.0575 | 1.24106 | C9H8O<br>C12H10N2O    | C00903 | [M+H]+     | BioDeepDB | 0.58978 | pos | 1 | 6222526.7  |
| M262T709   | Cinoxacin                            | 262.053895 | 709.106 | 262.059  | 19.4791 | 5<br>C17H18FN3        | C08052 | [M]+       | BioDeepDB | 0.86343 | pos | 1 | 3067372.51 |
| M331T462   | Ciprofloxacin                        | 331.13418  | 461.845 | 331.1332 | 2.89883 | 03                    | C05349 | [M]+       | mzCloud   | 0.69427 | pos | 1 | 2128404.65 |
| M130T33_1  | cis-4-Hydroxy-D-proline<br>cis-9,10- | 129.97431  | 32.8715 | 131.0582 | 1.5968  | C5H9NO3               | C03440 | [M-H]-     | BioDeepDB | 1.2E-06 | neg | 2 | 1237582.92 |
| M298T817   | Epoxy stearic                        | 298.245604 | 816.953 | 298.2508 | 17.4204 | C18H34O3              | C19418 | [M]+       | MetaDNA   | 0.01675 | pos | 2 | 46711934.8 |
| M155T293   | cis-Aconitate                        | 154.997061 | 292.621 | 174.0164 | 6.12369 | C6H6O6                | C00417 | [M-H2O-H]- | mzCloud   | 0.6818  | neg | 1 | 6376980.9  |
| M218T338   | Cis-zeatin                           | 218.044934 | 338.222 | 219.112  | 12.4408 | C10H13N5O             | C00371 | [M-H]-     | BioDeepDB | 0.00383 | neg | 2 | 8095741.55 |
| M143T228   | cis,cis-Muconate                     | 143.03287  | 227.633 | 142.0266 | 7.03395 | C6H6O4<br>C23H29ClF   | C02480 | [M+H]+     | mzCloud   | 3.7E-06 | pos | 2 | 117066970  |
| M465T419   | Cisapride                            | 465.186096 | 418.97  | 465.1831 | 6.44027 | N3O4                  | C06910 | [M]+       | mzCloud   | 0.76887 | pos | 1 | 1831951.68 |

|          |                       |            |         |          |         |           |           |        |                  |           |         |     |   |            |
|----------|-----------------------|------------|---------|----------|---------|-----------|-----------|--------|------------------|-----------|---------|-----|---|------------|
| M307T673 | Citalopram            | 307.150571 | 672.956 | 324.1638 | 18.8667 | 0         | C20H21FN2 | C07572 | [M+H-20]+        | mzCloud   | 0.87224 | pos | 1 | 1937896.51 |
| M488T184 | Citicoline            | 488.116157 | 183.708 | 488.1073 | 18.1446 | 11P2      | C14H26N4O | C00307 | [M]-             | BioDeepDB | 0.77903 | neg | 1 | 12921467.7 |
| M129T349 | Citraconic acid       | 129.018178 | 348.668 | 130.0266 | 8.8854  | C5H6O4    |           | C02226 | [M-H]-           | MoNA      | 2.8E-08 | neg | 2 | 32070440.3 |
| M129T147 | Citramalic acid       | 129.01816  | 147.455 | 148.0372 | 5.04111 | C5H8O5    |           | C00815 | [M-H20-H]-       | MoNA      | 2.7E-07 | neg | 2 | 40127934.4 |
| M385T436 | Citreoviridin         | 385.195551 | 436.069 | 402.2042 | 3.15377 | C23H30O6  |           | C16766 | [M+H-20]+        | mzCloud   | 0.62004 | pos | 1 | 2647290.51 |
| M193T164 | Citric acid           | 193.034061 | 163.846 | 192.027  | 1.03949 | C6H8O7    |           | C00158 | [M+H]+           | BioDeepDB | 1.2E-11 | pos | 2 | 329652756  |
| M233T143 | Citrinin              | 233.075942 | 142.85  | 250.0841 | 3.10493 | C13H14O5  |           | C16765 | [M+H-20]+        | mzCloud   | 0.72705 | pos | 1 | 13688263.5 |
| M176T91  | Citrulline            | 176.101644 | 90.7088 | 175.0957 | 7.56647 | C6H13N3O3 |           | C00327 | [M+H]+           | BioDeepDB | 0.0001  | pos | 2 | 8847720663 |
| M747T698 | Clarithromycin        | 747.462895 | 697.952 | 747.4769 | 18.7364 | 3         | C38H69N01 | C06912 | [M]+             | MoNA      | 0.86665 | pos | 1 | 2556048.39 |
| M180T215 | Clavulanate           | 180.028907 | 215.4   | 199.0481 | 4.46055 | C8H9N05   |           | C06662 | [M-H20-H]-       | BioDeepDB | 0.62377 | neg | 1 | 1533243.84 |
| M434T798 | Clerodin              | 434.232495 | 797.773 | 434.2305 | 4.5945  | C24H34O7  |           | C09075 | [M]+             | MoNA      | 0.99582 | pos | 1 | 57660813.5 |
| M340T352 | Clethodim             | 340.110382 | 351.663 | 359.1322 | 10.0803 | 03S       | C17H26C1N | C18609 | [M-H20-H]-       | BioDeepDB | 0.99968 | neg | 1 | 640055.561 |
| M424T299 | Clindamycin           | 424.178769 | 299.493 | 424.1799 | 2.66668 | 205S      | C18H33C1N | C06914 | [M]+             | BioDeepDB | 0.65439 | pos | 1 | 3766869.73 |
| M472T528 | Clofazimine           | 472.118483 | 528.185 | 472.1222 | 7.87218 | N4        | C27H22C12 | C06915 | [M]+             | GNPS      | 0.89624 | pos | 1 | 6805574.54 |
| M213T575 | Clofibric acid        | 213.029037 | 575.222 | 214.0397 | 15.7864 | 3         | C10H11C1O | C13700 | [M-H]-           | BioDeepDB | 1       | neg | 1 | 303929.186 |
| M388T787 | Clomifene             | 388.179212 | 786.569 | 405.1859 | 1.92254 | 0         | C26H28C1N | C06917 | [M+H-20]+        | BioDeepDB | 0.63179 | pos | 1 | 14656250.4 |
| M597T753 | Clomiphene<br>citrate | 597.226521 | 752.541 | 597.2129 | 12.061  | 0. C6H8O7 |           | C08161 | [M-<br>H20+NH4]+ | GNPS      | 0.99992 | pos | 1 | 6702418.01 |
| M314T801 | Clomipramine          | 314.160462 | 800.683 | 314.155  | 17.3873 | 2         | C19H23C1N | C06918 | [M]-             | MoNA      | 0.77145 | neg | 1 | 438323.451 |
| M212T163 | Clonidine             | 212.006404 | 162.728 | 229.0174 | 16.58   | C9H9C12N3 |           | C06920 | [M+H-20]+        | BioDeepDB | 1       | pos | 1 | 250199209  |

|                            |                                     |            |         |          |         |                                      |        |                       |           |         |     |   |            |
|----------------------------|-------------------------------------|------------|---------|----------|---------|--------------------------------------|--------|-----------------------|-----------|---------|-----|---|------------|
| M430T565<br>_1             | Cloransulam-<br>methyl              | 430.039304 | 564.534 | 429.031  | 2.39144 | C15H13ClF<br>N5O5S<br>C18H19ClN<br>4 | C10907 | [M+H] <sup>+</sup>    | MoNA      | 0.81005 | pos | 1 | 7818826.68 |
| M309T418                   | Clozapine                           | 309.121817 | 417.676 | 326.1298 | 1.77444 | 4<br>C9H14N3O8                       | C06924 | [M+H-20] <sup>+</sup> | mzCloud   | 0.69888 | pos | 1 | 2540119.36 |
| M324T137                   | CMP                                 | 324.215837 | 137.373 | 323.0519 | 3.61979 | P                                    | C00055 | [M+H] <sup>+</sup>    | BioDeepDB | 0.63042 | pos | 1 | 11041621.7 |
| M286T323                   | Cocaine                             | 286.139103 | 322.536 | 303.1471 | 1.96706 | C17H21N04                            | C01416 | [M+H-20] <sup>+</sup> | mzCloud   | 0.66312 | pos | 1 | 20419828.6 |
| M282T586                   | Codeine                             | 282.146991 | 585.968 | 299.1521 | 8.23929 | C18H21N03<br>C21H39N7O               | C06174 | [M+H-20] <sup>+</sup> | mzCloud   | 0.68811 | pos | 1 | 7948777.17 |
| M565T580<br>M862T563<br>_2 | Coelichelin<br>Coenzyme Q10         | 565.271276 | 580.22  | 565.2708 | 0.84254 | 11<br>C59H90O4                       | C15719 | [M] <sup>+</sup>      | GNPS      | 0.98722 | pos | 1 | 994472.619 |
| M400T814                   | Colchicine                          | 400.179262 | 814.095 | 399.1682 | 9.40143 | C22H25N06                            | C07592 | [M+H] <sup>+</sup>    | BioDeepDB | 0.68528 | pos | 1 | 256611452  |
| M323T191<br>M655T616<br>_1 | Coniferin<br>Coproporphyrin I       | 323.109851 | 191.259 | 342.1315 | 10.0872 | C16H22O8<br>C36H38N4O<br>8           | C00761 | [M-20-H] <sup>-</sup> | MoNA      | 0.00198 | neg | 2 | 710006.209 |
| M319T71                    | Coptisine                           | 319.083424 | 70.607  | 320.0923 | 5.01459 | C19H14N04<br>C21H26N2O               | C16938 | [M-H] <sup>-</sup>    | MoNA      | 0.9964  | neg | 1 | 116592.39  |
| M338T515                   | Coronaridine                        | 338.196053 | 514.727 | 338.1994 | 9.89793 | 2                                    | C09139 | [M] <sup>+</sup>      | GNPS      | 0.99964 | pos | 1 | 38589625.4 |
| M347T807                   | Cortexolone                         | 347.229452 | 807.232 | 346.2144 | 5.1103  | C21H30O4                             | C05488 | [M+H] <sup>+</sup>    | BioDeepDB | 0.62312 | pos | 1 | 1837541.48 |
| M329T788                   | Corticosterone                      | 329.215477 | 787.856 | 346.2144 | 25.8514 | C21H30O4                             | C02140 | [M+H-20] <sup>+</sup> | MoNA      | 0.00124 | pos | 2 | 12568170.4 |
| M362T469<br>M405T607<br>_1 | Cortisol<br>Cortisol 21-<br>acetate | 362.210377 | 469.252 | 362.2093 | 2.90681 | C21H30O5                             | C00735 | [M] <sup>+</sup>      | mzCloud   | 0.6391  | pos | 1 | 13137086.7 |
|                            |                                     | 405.219254 | 606.774 | 404.2199 | 19.5507 | C23H32O6                             | C02821 | [M+H] <sup>+</sup>    | BioDeepDB | 0.00125 | pos | 2 | 2648408.15 |
| M359T828<br>M383T675<br>_2 | Cortisone<br>Cortisone<br>acetate   | 359.185197 | 827.821 | 360.1937 | 2.39055 | C21H28O5                             | C00762 | [M-H] <sup>-</sup>    | BioDeepDB | 0.59771 | neg | 1 | 1754015.7  |
|                            |                                     | 383.180589 | 675.322 | 402.2042 | 13.6258 | C23H30O6                             | C08173 | [M-20-H] <sup>-</sup> | BioDeepDB | 0.84191 | neg | 1 | 189642.102 |
| M370T785                   | Corydaline                          | 370.198656 | 785.136 | 369.194  | 4.71044 | C22H27N04                            | C15530 | [M+H] <sup>+</sup>    | OTCML     | 0.65205 | pos | 1 | 3250767.99 |

|            |                | C22H26N2O  |         |          |         |                       |        |            |           |         |     |   |            |
|------------|----------------|------------|---------|----------|---------|-----------------------|--------|------------|-----------|---------|-----|---|------------|
| M347T456   | Corynantheine  | 347.169736 | 456.2   | 366.1943 | 17.7832 | 3                     | C17872 | [M-H2O-H]- | MetaDNA   | 0.10276 | neg | 2 | 5105283.84 |
| M431T543   | Cosmosiin      | 431.096017 | 543.216 | 432.1056 | 5.35123 | C21H20010             | C04608 | [M-H]-     | MoNA      | 1.5E-05 | neg | 2 | 1717057.92 |
| M233T565   | Costunolide    | 233.152774 | 564.534 | 232.1463 | 3.43838 | C15H2002<br>C19H15C10 | C09382 | [M+H]+     | MoNA      | 3.8E-06 | pos | 2 | 12311564.3 |
| M342T296   | Coumachlor     | 342.066238 | 295.704 | 342.0659 | 0.98951 | 4                     | C16805 | [M]-       | MoNA      | 0.98769 | neg | 1 | 1276146.3  |
| M299T613   | Coumafuryl     | 299.089868 | 612.699 | 298.0841 | 5.04097 | C17H1405<br>C14H16C10 | C18599 | [M+H]+     | mzCloud   | 0.67164 | pos | 1 | 1147099.39 |
| M362T218   | Coumaphos      | 362.013652 | 217.866 | 362.0145 | 2.34272 | 5PS                   | C11025 | [M]+       | BioDeepDB | 0.99145 | pos | 1 | 3142850.93 |
| M147T465   | Coumarin       | 147.043888 | 464.668 | 146.0368 | 1.27599 | C9H602<br>C16H24N4O   | C05851 | [M+H]+     | mzCloud   | 0.58803 | pos | 1 | 24680048   |
| M285T534   | CPX            | 285.169139 | 533.931 | 304.1899 | 8.31389 | 2                     | C13709 | [M-H2O-H]- | BioDeepDB | 0.99913 | neg | 1 | 3472070.38 |
| M114T69    | Creatine       | 114.063223 | 69.2834 | 131.0695 | 10.1404 | C4H9N3O2              | C00300 | [M+H-H2O]+ | MoNA      | 0.25255 | pos | 2 | 498973.576 |
| M113T66_2  | Creatinine     | 112.984059 | 66.2043 | 113.0589 | 2.25944 | C4H7N3O               | C00791 | [M]-       | BioDeepDB | 2.2E-13 | neg | 2 | 65013980   |
| M328T409   | Crocetin       | 328.167291 | 409.271 | 328.1675 | 0.51182 | C20H24O4<br>C10H13N5O | C08588 | [M]+       | OTCML     | 0.98614 | pos | 1 | 2275866.69 |
| M283T309   | Crotonoside    | 283.088609 | 309.091 | 283.0917 | 10.8088 | 5                     | C08432 | [M]-       | OTCML     | 0.88625 | neg | 1 | 16524473.8 |
| M558T825   | Cucurbitacin B | 558.329195 | 824.864 | 558.3193 | 17.7226 | C32H46O8              | C08794 | [M]-       | BioDeepDB | 0.75425 | neg | 1 | 4964144.44 |
| M517T679_1 | Cucurbitacin D | 517.311578 | 678.909 | 516.3087 | 8.50079 | C30H44O7              | C08796 | [M+H]+     | GNPS      | 0.78764 | pos | 1 | 34424461.2 |
| M557T423   | Cucurbitacin E | 557.297163 | 423.199 | 556.3036 | 24.6381 | C32H44O8              | C08797 | [M+H]+     | OTCML     | 1       | pos | 1 | 1698005.58 |
| M235T527   | Curcumenol     | 235.169082 | 526.676 | 234.162  | 0.73857 | C15H22O2              | C16942 | [M+H]+     | MoNA      | 0.01896 | pos | 2 | 16056679.1 |
| M349T268   | Curcumin       | 349.105876 | 268.419 | 368.126  | 4.96759 | C21H20O6              | C10443 | [M-H2O-H]- | BioDeepDB | 0.65393 | neg | 1 | 940298.03  |
| M240T239   | Cyanazine      | 240.085982 | 238.605 | 240.089  | 12.5702 | C9H13C1N6             | C14299 | [M]+       | mzCloud   | 0.83345 | pos | 1 | 15798898.6 |
| M324T126   | Cyanidin       | 324.215771 | 125.598 | 287.0556 | 6.92782 | C15H11O6              | C05905 | [M+H]+     | BioDeepDB | 0.79642 | pos | 1 | 6707314.83 |

|                       |                                    |            |         |          |         |                         |        |                        |           |         |     |   |            |
|-----------------------|------------------------------------|------------|---------|----------|---------|-------------------------|--------|------------------------|-----------|---------|-----|---|------------|
| M451T659_2            | Cyanidin 3-glucoside               | 451.103928 | 658.953 | 449.1084 | 19.8537 | C21H21O11               | C08604 | [M+H] <sup>+</sup>     | BioDeepDB | 0.97561 | pos | 1 | 55102897.3 |
| M595T355<br>M129T245  | Cyanidin 3-O-rutinoside            | 595.180411 | 355.41  | 595.1663 | 11.2788 | C27H31O15               | C08620 | [M-H] <sup>-</sup>     | mzCloud   | 0.81971 | pos | 1 | 3221461.15 |
| M236T327              | Cybutryne                          | 129.017473 | 244.891 | 129.0174 | 0.56308 | C3H3N3O3                | C06554 | [M] <sup>-</sup>       | BioDeepDB | 0.59373 | neg | 1 | 10856459.2 |
| M162T279              | Cyclamic acid                      | 236.129014 | 326.78  | 253.1361 | 1.47312 | C11H19N5S               | C10927 | [M+H-H2O] <sup>+</sup> | mzCloud   | 0.64168 | pos | 1 | 6152502.78 |
| M330T429              | Cyclic AMP                         | 162.054434 | 279.039 | 179.0616 | 1.65653 | C6H13N3O3S<br>C10H12N5O | C02824 | [M+H-H2O] <sup>+</sup> | MoNA      | 0.62882 | pos | 1 | 5207386.07 |
| M345T523<br>M216T334  | Cyclic GMP                         | 330.22643  | 428.735 | 329.0525 | 12.4444 | 6P<br>C10H12N5O         | C00575 | [M+H] <sup>+</sup>     | BioDeepDB | 0.79197 | pos | 1 | 3343463.81 |
| M127T421              | Cycloate Cyclohexane-1-carboxylate | 345.042196 | 523.055 | 345.0474 | 15.0831 | 7P                      | C00942 | [M] <sup>-</sup>       | BioDeepDB | 0.92926 | neg | 1 | 2201458.12 |
| M93T67                | Cyclohexane-1,3-dione              | 216.14179  | 333.715 | 215.1344 | 0.41814 | C11H21NOS               | C18780 | [M+H] <sup>+</sup>     | BioDeepDB | 0.98582 | pos | 1 | 6790725.61 |
| M100T69<br>M85T143_2  | Cyclohexylamine                    | 127.075007 | 420.799 | 128.0837 | 11.1506 | C7H12O2                 | C09822 | [M-H] <sup>-</sup>     | mzCloud   | 0.76855 | neg | 1 | 894837.132 |
| M291T730              | Cyclopentolate                     | 93.0330662 | 67.1831 | 112.0524 | 10.1446 | C6H8O2                  | C01066 | [M-H2O-H] <sup>-</sup> | MoNA      | 0.99969 | neg | 1 | 368636.419 |
| M278T338              | Cyclophosphamide                   | 100.112226 | 69.2834 | 99.1048  | 1.49815 | C6H13N                  | C00571 | [M+H] <sup>+</sup>     | mzCloud   | 0.61055 | pos | 1 | 6781618.62 |
| M336T351              | Cyclopentanone                     | 85.0838145 | 142.85  | 84.0575  | 8.77606 | C5H8O                   | C00557 | [M+H] <sup>+</sup>     | BioDeepDB | 0.11099 | pos | 2 | 18861452.4 |
| M199T31<br>M547T618_2 | Cyclurone                          | 291.183901 | 729.798 | 291.1834 | 1.72085 | C17H25N3O3<br>C7H15C12N | C06932 | [M] <sup>+</sup>       | BioDeepDB | 0.67277 | pos | 1 | 10804434.2 |
| M516T82               | Cyclopiazonic acid                 | 278.036816 | 338.222 | 278.0354 | 5.09111 | 202P. H2O<br>C20H20N2O  | C06933 | [M] <sup>-</sup>       | BioDeepDB | 0.9965  | neg | 1 | 1608176.04 |
| M274T375              | Cymarin                            | 336.144143 | 351.348 | 336.1474 | 9.66682 | 3                       | C03032 | [M] <sup>+</sup>       | mzCloud   | 0.8841  | pos | 1 | 10580165.1 |
| M516T82               | Cynarine                           | 199.181323 | 31.4047 | 198.1732 | 4.13393 | C11H22N2O               | C19109 | [M+H] <sup>+</sup>     | BioDeepDB | 0.9951  | pos | 1 | 6912244.38 |
| M274T375              | Cyproconazole                      | 547.282421 | 618.45  | 548.2985 | 16.0842 | C30H44O9                | C08859 | [M-H] <sup>-</sup>     | mzCloud   | 0.91315 | neg | 1 | 1166091.37 |
|                       |                                    | 516.123422 | 81.8855 | 516.1268 | 6.49906 | C25H24O12<br>C15H18ClN  | C10445 | [M] <sup>-</sup>       | OTCML     | 0.89916 | neg | 1 | 7642742.91 |
|                       |                                    | 274.104543 | 375.021 | 291.1138 | 6.65187 | 30                      | C18456 | [M+H-H2O] <sup>+</sup> | mzCloud   | 0.72342 | pos | 1 | 5620378.89 |





|            |                              |            |         |          |         |               |        |            |           |         |     |   |            |
|------------|------------------------------|------------|---------|----------|---------|---------------|--------|------------|-----------|---------|-----|---|------------|
| M259T106   | D-Fructose 1-phosphate       | 259.129135 | 105.537 | 260.1358 | 2.434   | C6H1309P      | C01094 | [M-H]-     | mzCloud   | 0.6144  | neg | 1 | 5961038.09 |
| M159T470   | D-galacto-Hexodialdose       | 159.027326 | 470.253 | 178.0477 | 12.478  | C6H1006       | C03269 | [M-H2O-H]- | MetaDNA   | 0.01686 | neg | 2 | 7052681.76 |
| M159T478   | D-Galactono-1,5-lactone      | 159.027438 | 477.982 | 178.0477 | 11.7695 | C6H1006       | C02669 | [M-H2O-H]- | MetaDNA   | 0.01633 | neg | 2 | 4349087.45 |
| M179T122   | D-Galactose                  | 179.054773 | 122.381 | 180.0634 | 3.89083 | C6H1206       | C00124 | [M-H]-     | BioDeepDB | 1.2E-13 | neg | 2 | 203383304  |
| M179T175   | D-Glucose                    | 179.054782 | 174.576 | 180.0634 | 7.42635 | C6H1206       | C00031 | [M-H]-     | MoNA      | 1.2E-11 | neg | 2 | 174025945  |
| M193T436   | D-Glucuronic acid            | 193.035651 | 436.18  | 194.0427 | 1.17532 | C6H1007       | C00191 | [M-H]-     | MetaDNA   | 0.00136 | neg | 2 | 22222161.1 |
| M175T83    | D-Glucurono-6,3-lactone      | 175.023828 | 82.8986 | 176.0321 | 0.1205  | C6H806        | C02670 | [M-H]-     | BioDeepDB | 0.58897 | neg | 1 | 22061186.8 |
| M169T480_1 | D-Glyceraldehyde 3-phosphate | 168.988014 | 479.541 | 169.998  | 15.8969 | C3H706P       | C00661 | [M-H]-     | BioDeepDB | 0.76536 | neg | 1 | 738906.653 |
| M212T260   | D-Glycero-D-galacto-heptitol | 212.090752 | 259.74  | 212.0896 | 5.43001 | C7H1607       | C08255 | [M]+       | MoNA      | 0.65191 | pos | 1 | 13702382.5 |
| M178T323   | D-Gulono-1,4-lactone         | 178.049499 | 322.536 | 178.048  | 8.42005 | C6H1006       | C05410 | [M]+       | BioDeepDB | 0.00025 | pos | 2 | 3180156.81 |
| M150T210   | D-Lyxose                     | 150.076795 | 210.186 | 150.0528 | 2.86212 | C5H1005       | C00476 | [M]+       | BioDeepDB | 5.4E-09 | pos | 2 | 22082097.3 |
| M343T649_1 | D-Maltose                    | 343.121812 | 649.338 | 342.1162 | 4.85049 | C12H22011     | C00208 | [M+H]+     | BioDeepDB | 0.72166 | pos | 1 | 22606315.6 |
| M179T286   | D-Mannose                    | 179.054763 | 286.433 | 180.0634 | 2.30738 | C6H1206       | C00159 | [M-H]-     | BioDeepDB | 7.3E-12 | neg | 2 | 69414104.4 |
| M259T79    | D-Mannose 1-phosphate        | 259.020554 | 79.4105 | 260.0297 | 7.22083 | C6H1309P      | C00636 | [M-H]-     | mzCloud   | 2.6E-07 | neg | 2 | 69098632.5 |
| M193T266_2 | D-Mannuronate                | 193.035567 | 265.541 | 194.0427 | 0.74102 | C6H1007       | C02024 | [M-H]-     | MetaDNA   | 0.04355 | neg | 2 | 14770525.1 |
| M229T98    | D-Octopine                   | 229.128679 | 97.7824 | 246.1328 | 14.46   | C9H18N4O4     | C04137 | [M+H-H2O]+ | MetaDNA   | 0.01215 | pos | 2 | 205591953  |
| M131T91    | D-Ornithine                  | 131.080916 | 90.9026 | 132.0899 | 13.0286 | C5H12N2O2     | C00515 | [M-H]-     | MetaDNA   | 0.00013 | neg | 2 | 208524884  |
| M169T167   | D-Ornithine hydrochloride    | 169.060113 | 166.613 | 168.0666 | 11.3356 | C5H12N2O2.HCl | C11320 | [M+H]+     | BioDeepDB | 0.72056 | pos | 1 | 2329058.3  |
| M555T744   | D-Pantethine                 | 555.250617 | 744.182 | 554.2444 | 1.90736 | 8S2           | C12661 | [M+H]+     | BioDeepDB | 0.66365 | pos | 1 | 1897945.21 |

|                      |                 |            |         |          |         |                       |        |           |           |         |     |   |            |
|----------------------|-----------------|------------|---------|----------|---------|-----------------------|--------|-----------|-----------|---------|-----|---|------------|
| M163T121_2           | D-Psicose       | 163.060617 | 120.525 | 180.0634 | 28.5206 | C6H12O6               | C06468 | [M+H-20]+ | BioDeepDB | 0.014   | pos | 2 | 225678248  |
| M149T85_2            | D-Ribose        | 149.044568 | 85.0169 | 150.0528 | 0.22523 | C5H10O5               | C00121 | [M-H]-    | BioDeepDB | 5.1E-09 | neg | 2 | 81639613.9 |
| M193T528             | D-Tagaturonate  | 193.035647 | 527.688 | 194.0427 | 1.15528 | C6H10O7               | C00558 | [M-H]-    | MetaDNA   | 0.01844 | neg | 2 | 19719222.1 |
| M150T44              | D-Tartaric acid | 150.018171 | 43.6868 | 150.0164 | 11.8043 | C4H6O6                | C02107 | [M]-      | BioDeepDB | 0.73168 | neg | 1 | 98413.2934 |
| M153T239             | D-Xylitol       | 153.127042 | 238.605 | 152.0685 | 0.01755 | C5H12O5               | C00379 | [M+H]+    | BioDeepDB | 7.3E-08 | pos | 2 | 31613739.8 |
| M149T626             | D-Xylose        | 149.043193 | 626.183 | 150.0528 | 9.24314 | C5H10O5               | C00181 | [M-H]-    | BioDeepDB | 0.00071 | neg | 2 | 7049268.34 |
| M182T332             | Dacarbazine     | 182.092228 | 332.105 | 182.0916 | 3.44728 | C6H10N6O<br>C10H6Cl4O | C06936 | [M]-      | BioDeepDB | 0.99387 | neg | 1 | 19825642.5 |
| M313T39<br>M254T308  | Dacthal         | 312.898285 | 39.4128 | 329.902  | 11.8862 | 4                     | C14744 | [M+H-20]+ | MoNA      | 0.9999  | pos | 1 | 994380.563 |
| _1                   | Daidzein        | 254.054404 | 307.735 | 254.0579 | 13.7605 | C15H10O4              | C10208 | [M]+      | BioDeepDB | 0.81454 | pos | 1 | 12609609   |
| M415T483<br>M514T703 | Daidzin         | 415.104389 | 482.656 | 416.1107 | 1.76963 | C21H20O9<br>C26H35N5O | C10216 | [M-H]-    | BioDeepDB | 0.59488 | neg | 1 | 355205.745 |
| _2                   | DAMGO           | 514.267409 | 703.35  | 513.2587 | 2.72008 | 6<br>C10H14N5O        | C11318 | [M+H]+    | MoNA      | 0.99234 | pos | 1 | 39988058.5 |
| M331T320             | dAMP            | 331.06659  | 319.785 | 331.0682 | 4.86322 | 6P                    | C00360 | [M]-      | GNPS      | 0.71295 | neg | 1 | 10206334   |
| M337T740             | Danazol         | 337.198867 | 740.014 | 337.2042 | 15.8146 | C22H27NO2             | C06938 | [M]+      | BioDeepDB | 0.80845 | pos | 1 | 3123131.69 |
| M221T81              | Dantron         | 221.028982 | 80.6174 | 240.0423 | 22.9464 | C14H8O4               | C10312 | [M-20-H]- | BioDeepDB | 1       | neg | 1 | 4024017.56 |
| M333T376             | Daphnoretin     | 333.038116 | 376.15  | 352.0583 | 5.38648 | C19H12O7<br>C12H12N2O | C09216 | [M-20-H]- | MoNA      | 0.99687 | neg | 1 | 836063.09  |
| M247T264             | Dapsone         | 247.056366 | 263.845 | 248.0619 | 6.74367 | 2S                    | C07666 | [M-H]-    | BioDeepDB | 0.66163 | neg | 1 | 2608655.99 |
| M317T591             | Dattelic acid   | 317.065109 | 590.717 | 336.0845 | 3.15593 | C16H16O8<br>C27H29NO1 | C10434 | [M-20-H]- | GNPS      | 0.79879 | neg | 1 | 1233753.76 |
| M526T486             | Daunorubicin    | 526.161543 | 485.784 | 527.1791 | 19.5406 | 0<br>C9H15N3O1        | C01907 | [M-H]-    | BioDeepDB | 0.98514 | neg | 1 | 3631447.95 |
| M387T325             | dCDP            | 387.029552 | 325.35  | 387.0233 | 16.1534 | 0P2                   | C00705 | [M]+      | BioDeepDB | 0.81088 | pos | 1 | 1684376.57 |

|          |                                | C9H14N3O7  |         |          |         |           |        |              |           |         |     |   |            |
|----------|--------------------------------|------------|---------|----------|---------|-----------|--------|--------------|-----------|---------|-----|---|------------|
| M307T209 | dCMP                           | 307.057077 | 209.472 | 307.0569 | 0.57514 | P         | C00239 | [M]-         | GNPS      | 0.65489 | neg | 1 | 48590766.3 |
| M415T811 | Deacetylvindolin               | 415.222448 | 811.413 | 414.2155 | 0.60755 | 5         | C01091 | [M+H]+       | BioDeepDB | 0.98646 | pos | 1 | 17027514.2 |
| _2       | Decanoyl-L-                    |            |         |          |         |           |        |              |           |         |     |   |            |
| M315T787 | carnitine                      | 315.243196 | 787.078 | 315.241  | 7.09853 | C17H33N04 | C03299 | [M]-         | BioDeepDB | 0.99846 | neg | 1 | 4569910.18 |
| M311T530 | Decursin                       | 311.127661 | 529.713 | 328.1311 | 12.9253 | C19H20O5  | C09258 | [M+H-20]+    | OTCML     | 0.99996 | pos | 1 | 2083572.12 |
| M188T516 | Deethylatrazine                | 188.070073 | 516.214 | 187.0625 | 1.57761 | C6H10C1N5 | C06559 | [M+H]+       | mzCloud   | 0.6085  | pos | 1 | 5943829.15 |
| _1       |                                |            |         |          |         |           |        |              |           |         |     |   |            |
| M560T584 | Deferoxamine                   | 560.361821 | 584.417 | 560.3534 | 15.0279 | 8         | C06940 | [M]+         | GNPS      | 0.92055 | pos | 1 | 4461892.33 |
| M367T207 | Dehydrocorydalin               | 367.174504 | 207.393 | 366.1705 | 9.0007  | +         | C17790 | [M+H]+       | OTCML     | 0.81956 | pos | 1 | 2206612.06 |
| M288T791 | e                              |            |         |          |         |           |        |              |           |         |     |   |            |
| M288T791 | Dehydroepiandrosterone         | 288.29061  | 790.802 | 288.2089 | 1.10115 | C19H28O2  | C01227 | [M]+         | BioDeepDB | 0.60045 | pos | 1 | 28410883.7 |
| M351T616 | Dehydroepiandrosterone sulfate | 351.152339 | 615.594 | 368.1657 | 16.8789 | C19H28O5S | C04555 | [M+H-20]+    | GNPS      | 0.91325 | pos | 1 | 4784187.08 |
| M403T827 | Delta-Tocopherol               | 403.35889  | 827.271 | 402.3498 | 4.43713 | C27H46O2  | C14151 | [M+H]+       | BioDeepDB | 0.62634 | pos | 1 | 1813897.73 |
| M488T483 |                                | 488.258348 | 482.656 | 507.2832 | 13.2347 | C27H41N08 | C08679 | [M-20-H]-    | BioDeepDB | 0.99997 | neg | 1 | 593062.616 |
| _2       | Deltaline                      |            |         |          |         |           |        |              |           |         |     |   |            |
| M175T104 | Demethylated antipyrine        | 175.088775 | 104.493 | 174.0793 | 12.4243 | C10H10N2O | C13008 | [M+H]+       | BioDeepDB | 0.79339 | pos | 1 | 51329645.1 |
| M176T196 | Dencichin                      | 176.045324 | 195.791 | 176.0433 | 11.3768 | C5H8N2O5  | C04209 | [M]-         | OTCML     | 0.81611 | neg | 1 | 233939.262 |
| M391T837 | Deoxycholic acid               | 391.252392 | 836.769 | 392.2927 | 0.03089 | C24H40O4  | C04483 | [M-H]-       | BioDeepDB | 0.57684 | neg | 1 | 1118216.37 |
| M331T800 | Deoxycorticosterone            | 331.225972 | 800.484 | 330.2195 | 2.42829 | C21H30O3  | C03205 | [M+H]+       | BioDeepDB | 0.62652 | pos | 1 | 21342709   |
| M372T736 | Deoxycorticosterone acetate    | 372.251645 | 735.7   | 372.2301 | 1.93759 | C23H32O4  | C14554 | [M-H20+NH4]+ | BioDeepDB | 0.63217 | pos | 1 | 1667024.69 |
| M227T214 | Deoxycytidine                  | 227.090658 | 213.872 | 227.0906 | 0.25751 | C9H13N3O4 | C00881 | [M]+         | BioDeepDB | 0.6018  | pos | 1 | 5993023.13 |
| M267T416 | Deoxyguanosine                 | 267.097364 | 416.239 | 267.0968 | 0.18073 | 4         | C00330 | [M]+         | BioDeepDB | 0.59469 | pos | 1 | 6307568.74 |
| M233T817 | Deoxyinosine                   | 233.153283 | 817.214 | 252.0859 | 4.28333 | 4         | C05512 | [M-20-H]-    | BioDeepDB | 0.6555  | neg | 1 | 2342024.39 |

|          |                              |            |         |          |         |                |        |                        |           |                       |             |            |            |
|----------|------------------------------|------------|---------|----------|---------|----------------|--------|------------------------|-----------|-----------------------|-------------|------------|------------|
| M172T528 | Deoxypeganine                | 172.104563 | 527.688 | 172.1    | 26.5149 | C11H12N2       | C10656 | [M] <sup>-</sup>       | MoNA      | 1 neg                 | 1           | 1296707.54 |            |
| M117T66  | Deoxyribose                  | 117.054175 | 65.7101 | 134.0579 | 8.75966 | C5H10O4        | C01801 | [M+H-H2O] <sup>+</sup> | BioDeepDB | 0.19212 pos           | 2           | 87062709.4 |            |
| M214T369 | Deoxyribose 1-phosphate      | 214.107455 | 368.559 | 214.1104 | 13.7537 | C5H11O7P       | C00672 | [M] <sup>-</sup>       | MoNA      | 0.82497 neg           | 1           | 3925019.13 |            |
| M228T810 | Deoxyuridine                 | 228.192042 | 810.052 | 228.0746 | 16.0488 | C9H12N2O5      | C00526 | [M] <sup>+</sup>       | BioDeepDB | 1.1E-11 pos           | 2           | 23760633.9 |            |
| M468T527 | Deoxyuridine-5'-triphosphate | 468.387869 | 526.676 | 467.974  | 4.86693 | C9H15N2O14P3   | C00460 | [M+H] <sup>+</sup>     | BioDeepDB | 0.73134 pos           | 1           | 1380617.98 |            |
| M687T293 | Dephospho-CoA                | 687.165736 | 292.623 | 687.1489 | 5.80316 | C21H35N7O13P2S | C00882 | [M] <sup>-</sup>       | BioDeepDB | H2O+NH4] <sup>+</sup> | 0.99733 pos | 1          | 2305297.54 |
| M167T620 | Desaminotyrosine             | 167.069815 | 620.172 | 166.063  | 2.7571  | C9H10O3        | C01744 | [M+H] <sup>+</sup>     | BioDeepDB | 0.00683 pos           | 2           | 32450394.2 |            |
| M339T421 | Desmethylxanthohumol         | 339.124511 | 420.799 | 340.1311 | 2.02544 | C20H20O5       | C16416 | [M-H] <sup>-</sup>     | MoNA      | 0.62923 neg           | 1           | 223242.009 |            |
| M365T835 | Desmosterol                  | 365.231576 | 835.329 | 384.3392 | 1.77808 | C27H44O        | C01802 | [M-H2O-H] <sup>-</sup> | BioDeepDB | 0.60501 neg           | 1           | 2240074.32 |            |
| M213T375 | Dethiobiotin                 | 213.039488 | 374.746 | 214.1317 | 2.65702 | C10H18N2O3     | C01909 | [M-H] <sup>-</sup>     | BioDeepDB | 0.61458 neg           | 1           | 593144.273 |            |
| M375T321 | Dexamethasone                | 375.185867 | 321.198 | 392.1999 | 17.5894 | C22H29F05      | C15643 | [M+H-H2O] <sup>+</sup> | GNPS      | 1 pos                 | 1           | 11434736.2 |            |
| M433T441 | Dexamethasone acetate        | 433.204788 | 440.833 | 434.2105 | 3.6104  | C24H31F06      | C08174 | [M-H] <sup>-</sup>     | MoNA      | 0.99418 neg           | 1           | 2253824.4  |            |
| M271T527 | Dextromethorphan             | 271.189778 | 526.676 | 271.1936 | 14.0939 | C18H25NO       | C06947 | [M] <sup>+</sup>       | MoNA      | 0.94735 pos           | 1           | 3650592.59 |            |
| M428T308 | dGDP                         | 428.0479   | 307.735 | 427.0294 | 26.1659 | C10H15N5O10P2  | C00361 | [M+H] <sup>+</sup>     | BioDeepDB | 0.86826 pos           | 1           | 915997.008 |            |
| M348T282 | dGMP                         | 348.06834  | 281.666 | 347.0631 | 4.22084 | C10H14N5O7P    | C00362 | [M+H] <sup>+</sup>     | BioDeepDB | 0.6631 pos            | 1           | 19285999.1 |            |
| M311T143 | Dhurrin                      | 311.097253 | 143.174 | 311.1005 | 10.4384 | C14H17N07      | C05143 | [M] <sup>-</sup>       | MetaDNA   | 5.5E-06 neg           | 2           | 13120719.7 |            |
| M95T329  | Di-2-propenyl sulfide        | 95.0316771 | 328.999 | 114.0503 | 2.45072 | C6H10S         | C08370 | [M-H2O-H] <sup>-</sup> | MoNA      | 0.67485 neg           | 1           | 1021988.11 |            |
| M371T45  | Di(2-ethylhexyl) adipate     | 371.312703 | 45.3435 | 370.3083 | 7.73799 | C22H42O4       | C14240 | [M+H] <sup>+</sup>     | mzCloud   | 0.07786 pos           | 2           | 3394684.88 |            |
| M349T531 | Diacetoxyscirpenol           | 349.162273 | 531.127 | 366.1679 | 5.17664 | C19H26O7       | C09662 | [M+H-H2O] <sup>+</sup> | mzCloud   | 0.68055 pos           | 1           | 3567391.38 |            |

|                      |                                   |            |         |          |         |                         |        |                        |           |         |       |   |            |
|----------------------|-----------------------------------|------------|---------|----------|---------|-------------------------|--------|------------------------|-----------|---------|-------|---|------------|
| M191T96              | Diaminopimelic acid               | 191.102088 | 95.7572 | 190.0954 | 2.85399 | C7H14N2O4<br>C16H13C1N  | C00666 | [M+H] <sup>+</sup>     | MoNA      | 0.61002 | pos   | 1 | 77755596   |
| M284T399             | Diazepam                          | 284.075001 | 399.046 | 284.0716 | 11.8271 | 20<br>C12H21N2O         | C06948 | [M] <sup>+</sup>       | mzCloud   | 0.88942 | pos   | 1 | 3664156.1  |
| M304T178<br>M230T233 | Diazinon                          | 304.101777 | 178.408 | 304.1011 | 2.2254  | 3PS<br>C8H7C1N2O        | C14324 | [M] <sup>+</sup>       | MoNA      | 0.62925 | pos   | 1 | 6980213.79 |
| _1                   | Diazoxide                         | 229.989171 | 233.081 | 229.9917 | 10.9943 | 2S                      | C06949 | [M] <sup>+</sup>       | MoNA      | 0.87329 | pos   | 1 | 525599.956 |
| M279T701             | Dibutyl phthalate                 | 279.16004  | 700.758 | 278.1518 | 3.42186 | C16H22O4                | C14214 | [M+H] <sup>+</sup>     | MoNA      | 1.5E-13 | pos   | 2 | 28532030   |
| M221T75              | Dicamba                           | 220.979661 | 74.9588 | 219.9694 | 13.5073 | C8H6C12O3               | C18597 | [M+H] <sup>+</sup>     | MoNA      | 0.99997 | pos   | 1 | 198211011  |
| M171T36              | Dichlobenil                       | 170.960392 | 35.8675 | 170.9643 | 22.8602 | C7H3C12N<br>C9H11C12F   | C11040 | [M] <sup>+</sup>       | MoNA      |         | 1 pos | 1 | 2182799.43 |
| M333T75              | Dichlofluanid                     | 332.962442 | 74.9588 | 331.9623 | 21.4245 | N2O2S2<br>C8H11C12N     | C18820 | [M+H] <sup>+</sup>     | MoNA      |         | 1 pos | 1 | 9932866.59 |
| M188T277<br>M219T139 | Dichlormid                        | 188.001198 | 276.825 | 207.0218 | 11.7678 | O<br>C4H7C12O4          | C18782 | [M-H2O-H] <sup>-</sup> | MoNA      | 0.99989 | neg   | 1 | 5261640.52 |
| _1                   | Dichlorvos                        | 218.944469 | 138.719 | 219.9459 | 26.6945 | P<br>C13H10C12          | C14430 | [M-H] <sup>-</sup>     | MoNA      | 0.87391 | neg   | 1 | 879544.354 |
| M405T84              | Diclosulam                        | 404.980825 | 83.5661 | 404.9865 | 14.0126 | FN5O3S                  | C18821 | [M] <sup>+</sup>       | MoNA      | 0.99998 | pos   | 1 | 3451757.88 |
| M337T129             | Dicumaryl Dicyclohexyl            | 337.075279 | 129.234 | 336.0634 | 13.6567 | C19H12O6                | C00796 | [M+H] <sup>+</sup>     | MetaDNA   | 0.07859 | pos   | 2 | 44620180.6 |
| M331T438             | phthalate                         | 331.185541 | 437.571 | 330.1831 | 14.5986 | C20H26O4                | C14529 | [M+H] <sup>+</sup>     | mzCloud   | 0.93989 | pos   | 1 | 1613138.2  |
| M292T765             | Dicyclomine                       | 292.259948 | 765.406 | 309.2668 | 1.99157 | C19H35N2O2<br>C10H12N4O | C06951 | [M+H-2O] <sup>+</sup>  | mzCloud   | 0.59429 | pos   | 1 | 13349865.1 |
| M236T476             | Didanosine                        | 236.092423 | 476.451 | 236.0909 | 6.45258 | 3<br>C22H48N.           | C06953 | [M] <sup>-</sup>       | MoNA      | 0.91429 | neg   | 1 | 1465613.16 |
| M344T816             | Didecyl dimethylammonium chloride | 344.350037 | 815.517 | 361.3475 | 28.9567 | Cl                      | C15436 | [M+H-2O] <sup>+</sup>  | mzCloud   | 0.99852 | pos   | 1 | 8663809.96 |
| M105T52              | Diethanolamine Diethyl            | 105.002936 | 52.4521 | 105.079  | 5.82489 | C4H11N2O                | C06772 | [M] <sup>+</sup>       | BioDeepDB | 0.646   | pos   | 1 | 4195141.16 |
| M223T709             | phthalate                         | 223.095826 | 709.106 | 222.0892 | 2.91362 | C12H14O4                | C14175 | [M+H] <sup>+</sup>     | mzCloud   | 0.62966 | pos   | 1 | 4466304.69 |
| M182T219             | Diethylcarbamazine                | 182.162066 | 219.233 | 199.1685 | 5.49018 | C10H21N3O               | C07968 | [M+H-2O] <sup>+</sup>  | BioDeepDB | 0.63086 | pos   | 1 | 1505000.43 |

|          |                             |            |         |          |         |                        |        |                        |           |         |     |   |            |
|----------|-----------------------------|------------|---------|----------|---------|------------------------|--------|------------------------|-----------|---------|-----|---|------------|
| M155T402 | Diethylphosphoric acid      | 155.04465  | 401.963 | 154.0395 | 13.7154 | C4H11O4P               | C06608 | [M+H] <sup>+</sup>     | mzCloud   | 0.87907 | pos | 1 | 15333887.4 |
| M206T314 | Diethylpropion              | 206.149331 | 314.259 | 205.1467 | 22.1622 | C13H19NO               | C06954 | [M+H] <sup>+</sup>     | BioDeepDB | 0.89907 | pos | 1 | 4686017.09 |
| M251T458 | Diethylstilbestrol          | 251.138434 | 457.576 | 268.1463 | 1.72159 | C18H20O2               | C07620 | [M+H-H2O] <sup>+</sup> | MoNA      | 0.87653 | pos | 1 | 1894720.48 |
| M169T131 | Diethylthiophosphoric acid  | 169.00734  | 131.207 | 170.0167 | 12.3286 | C4H11O3PS              | C06607 | [M-H] <sup>-</sup>     | mzCloud   | 0.71679 | neg | 1 | 1043171.16 |
| M427T662 | Difenacoum                  | 427.167017 | 661.979 | 444.1725 | 4.56696 | C31H24O3<br>C14H9C1F2  | C16807 | [M+H-H2O] <sup>+</sup> | mzCloud   | 0.69837 | pos | 1 | 23553136.5 |
| M291T390 | Diflubenzuron               | 291.014212 | 389.839 | 310.0321 | 1.72569 | N2O2                   | C14427 | [M-H2O-H] <sup>-</sup> | BioDeepDB | 0.91413 | neg | 1 | 1547428.68 |
| M249T531 | Diflunisal                  | 249.03965  | 530.804 | 250.0442 | 10.9467 | C13H8F2O3              | C01691 | [M-H] <sup>-</sup>     | BioDeepDB | 0.92217 | neg | 1 | 1316722    |
| M370T523 | Digalacturonate             | 370.071363 | 523.055 | 370.0747 | 9.01683 | C12H18O13              | C02273 | [M] <sup>-</sup>       | BioDeepDB | 0.73483 | neg | 1 | 37629807   |
| M764T694 | Digitoxin                   | 764.429277 | 693.81  | 764.4347 | 7.09384 | C41H64O13              | C06955 | [M] <sup>+</sup>       | MoNA      | 0.7601  | pos | 1 | 2881109.58 |
| M223T87  | Diglycidyl resorcinol ether | 223.09924  | 86.6643 | 222.0892 | 12.3908 | C12H14O4               | C19228 | [M+H] <sup>+</sup>     | mzCloud   | 0.96985 | pos | 1 | 12825824.7 |
| M763T813 | Digoxin                     | 763.413732 | 812.862 | 780.4296 | 11.0478 | C41H64O14              | C06956 | [M+H-H2O] <sup>+</sup> | GNPS      | 0.70243 | pos | 1 | 2718642.45 |
| M309T820 | Dihydroalibocycline         | 309.206435 | 820.294 | 310.2144 | 2.22804 | C18H30O4               | C15753 | [M-H] <sup>-</sup>     | MoNA      | 0.99116 | neg | 1 | 114694926  |
| M239T777 | Dihydrobiopterin            | 239.096879 | 777.245 | 239.1018 | 20.5824 | C9H13N5O3              | C02953 | [M] <sup>+</sup>       | MoNA      | 0.81696 | pos | 1 | 4263598.22 |
| M308T629 | Dihydrocapsaicin            | 308.219859 | 629.015 | 307.2147 | 6.86716 | C18H29NO3<br>C33H37N5O | C16952 | [M+H] <sup>+</sup>     | BioDeepDB | 0.00031 | pos | 2 | 123389358  |
| M566T636 | Dihydroergotamine           | 566.280162 | 636.473 | 583.2795 | 14.2962 | 5                      | C07798 | [M+H-H2O] <sup>+</sup> | GNPS      | 0.87841 | pos | 1 | 25253853.5 |
| M443T388 | Dihydrofolic acid           | 443.162236 | 387.763 | 443.1553 | 15.6517 | 6                      | C00415 | [M] <sup>+</sup>       | BioDeepDB | 0.99412 | pos | 1 | 3591990.97 |
| M207T634 | Dihydrolipoate              | 207.052406 | 633.832 | 208.0592 | 2.32586 | C8H16O2S2              | C02147 | [M-H] <sup>-</sup>     | BioDeepDB | 0.75519 | neg | 1 | 291979189  |
| M257T715 | Dihydromethysticin          | 257.082417 | 714.841 | 276.0998 | 3.91799 | C15H16O5               | C09926 | [M-H2O-H] <sup>-</sup> | GNPS      | 0.70818 | neg | 1 | 1989039.58 |
| M303T84  | Dihydromyricetin            | 303.043117 | 83.5661 | 320.0532 | 8.79633 | C15H12O8               | C02906 | [M+H-H2O] <sup>+</sup> | OTCML     | 0.88097 | pos | 1 | 10569565.7 |

|            |                            |            |         |          |         |                        |        |           |           |         |     |   |            |
|------------|----------------------------|------------|---------|----------|---------|------------------------|--------|-----------|-----------|---------|-----|---|------------|
| M265T256   | Dihydrophaseic acid        | 265.13894  | 255.723 | 282.1467 | 1.22825 | C15H22O5               | C15971 | [M+H-20]+ | GNPS      | 0.6077  | pos | 1 | 3795714.95 |
| M213T320_1 | Dihydroresveratrol         | 213.085759 | 319.758 | 230.0943 | 5.16466 | C14H14O3               | C10255 | [M+H-20]+ | OTCML     | 0.8971  | pos | 1 | 35802072.3 |
| M273T562   | Dihydrotestosterone        | 273.219943 | 561.955 | 290.2246 | 10.1645 | C19H30O2               | C03917 | [M+H-20]+ | BioDeepDB | 3.1E-07 | pos | 2 | 36871439.7 |
| M129T339   | Dihydrothymine             | 129.065533 | 339.085 | 128.0586 | 2.48213 | C5H8N2O2               | C00906 | [M+H]+    | MoNA      | 0.68311 | pos | 1 | 2440668.79 |
| M113T33_3  | Dihydrouracil              | 113.034099 | 32.8715 | 114.0429 | 13.4953 | C4H6N2O2               | C00429 | [M-H]-    | BioDeepDB | 4.6E-07 | neg | 2 | 308919.662 |
| M171T57    | Dihydroxyacetone phosphate | 171.005012 | 57.4179 | 169.998  | 1.54519 | C3H7O6P                | C00111 | [M+H]+    | BioDeepDB | 1.9E-06 | pos | 2 | 2704655.23 |
| M221T784   | Dihydrozeatin Diisobutyl   | 221.128334 | 784.051 | 221.1277 | 2.86884 | C10H15N5O              | C02029 | [M]-      | MoNA      | 0.64314 | neg | 1 | 961090.575 |
| M279T674   | phthalate Diisodecyl       | 279.160231 | 674.402 | 278.1518 | 4.13724 | C16H22O4               | C15205 | [M+H]+    | mzCloud   | 1E-09   | pos | 2 | 38478900.8 |
| M446T610   | phthalate Diisooctyl       | 446.348302 | 609.592 | 446.3396 | 19.4732 | C28H46O4               | C14578 | [M]+      | mzCloud   | 0.9573  | pos | 1 | 1468835    |
| M391T695   | phthalate Diisopropyl      | 391.289196 | 695.155 | 390.277  | 12.5726 | C24H38O4               | C14577 | [M+H]+    | mzCloud   | 1E-10   | pos | 2 | 17276929.3 |
| M233T172   | phthalate                  | 233.112384 | 171.935 | 250.1205 | 2.92511 | C14H18O4<br>C22H26N2O  | C14468 | [M+H-20]+ | MoNA      | 0.99279 | pos | 1 | 8827719.67 |
| M415T838   | Diltiazem                  | 415.173558 | 837.524 | 414.1613 | 11.9319 | 4S<br>C15H19C1N        | C06958 | [M+H]+    | MoNA      | 0.691   | pos | 1 | 11033979.4 |
| M321T413   | Dimefuron                  | 321.104675 | 413.295 | 338.1146 | 7.75828 | 4O3<br>C12H18C1N       | C18783 | [M+H-20]+ | mzCloud   | 0.75881 | pos | 1 | 19373007.2 |
| M275T219   | Dimethenamid               | 275.072375 | 219.233 | 275.0747 | 8.37009 | 02S                    | C18499 | [M]+      | mzCloud   | 0.86509 | pos | 1 | 8401099.21 |
| M192T36_3  | Dimethirimol               | 192.1459   | 35.8675 | 209.1528 | 2.78143 | C11H19N3O<br>C5H12N03P | C18784 | [M+H-20]+ | mzCloud   | 0.6906  | pos | 1 | 7620611.94 |
| M229T250   | Dimethoate                 | 229.00118  | 250.144 | 228.9996 | 6.89979 | S2                     | C14326 | [M]+      | MoNA      | 0.99831 | pos | 1 | 2298012.57 |
| M95T562    | Dimethyl sulfone           | 95.0857225 | 561.955 | 94.0089  | 0.49569 | C2H6O2S                | C11142 | [M+H]+    | BioDeepDB | 0.00292 | pos | 2 | 144686363  |
| M126T39    | Dimethyl trisulfide        | 125.96365  | 39.4128 | 125.9632 | 3.57189 | C2H6S3                 | C08372 | [M]+      | BioDeepDB | 0.75258 | pos | 1 | 7110746.55 |
| M147T369   | Dimethylbenzimidazole      | 147.091146 | 369.321 | 146.0844 | 3.60567 | C9H10N2                | C03114 | [M+H]+    | mzCloud   | 0.81633 | pos | 1 | 17156261.6 |

|          |                                           |            |         |          |         |                       |        |                       |           |         |     |   |            |
|----------|-------------------------------------------|------------|---------|----------|---------|-----------------------|--------|-----------------------|-----------|---------|-----|---|------------|
| M104T101 | Dimethylglycine<br>Dimethyltryptami<br>ne | 104.04187  | 101.161 | 103.0633 | 1.02743 | C4H9NO2               | C01026 | [M+H] <sup>+</sup>    | BioDeepDB | 0.58547 | pos | 1 | 5443607.74 |
| M189T456 |                                           | 189.138034 | 456.126 | 188.1313 | 2.86617 | C12H16N2              | C08302 | [M+H] <sup>+</sup>    | MoNA      | 0.00012 | pos | 2 | 134252101  |
| M88T237  | Dimethylurea                              | 88.063923  | 237.171 | 88.0637  | 2.53271 | C3H8N2O<br>C10H13N4O  | C16364 | [M] <sup>+</sup>      | BioDeepDB | 0.60689 | pos | 1 | 643697.773 |
| M332T443 | dIMP                                      | 332.048315 | 443.256 | 332.0522 | 11.6995 | 7P<br>C10H12N2O       | C06196 | [M] <sup>+</sup>      | MoNA      | 0.86549 | pos | 1 | 4179480.45 |
| M239T293 | Dinoseb                                   | 239.074467 | 292.621 | 240.0746 | 29.7878 | 5                     | C14302 | [M-H] <sup>-</sup>    | MoNA      | 0.00019 | neg | 2 | 8533479.96 |
| M397T830 | Diosgenin                                 | 397.310887 | 830.193 | 414.3134 | 12.385  | C27H42O3              | C08898 | [M+H-20] <sup>+</sup> | mzCloud   | 5E-05   | pos | 2 | 12608175.3 |
| M608T296 | Diosmin                                   | 608.163652 | 295.704 | 608.1741 | 17.1793 | C28H32O15             | C10039 | [M] <sup>-</sup>      | BioDeepDB | 0.92252 | neg | 1 | 1122636.91 |
| M255T771 | Diphenhydramine                           | 255.158552 | 771.042 | 255.1623 | 14.6901 | C17H21NO<br>C30H32N2O | C06960 | [M] <sup>+</sup>      | MoNA      | 0.77213 | pos | 1 | 5097191.04 |
| M435T736 | Diphenoxylate                             | 435.236111 | 735.7   | 452.2464 | 6.56021 | 2                     | C07872 | [M+H-20] <sup>+</sup> | GNPS      | 0.71979 | pos | 1 | 1063465.7  |
| M170T833 | Diphenylamine                             | 170.095824 | 833.029 | 169.0891 | 3.24418 | C12H11N<br>C24H40N8O  | C11016 | [M+H] <sup>+</sup>    | MoNA      | 2.5E-06 | pos | 2 | 334677371  |
| M504T748 | Dipyridamole                              | 504.31177  | 748.486 | 504.3173 | 10.8698 | 4<br>C10H20N2S        | C06964 | [M] <sup>+</sup>      | BioDeepDB | 0.9998  | pos | 1 | 5988754.92 |
| M279T423 | Disulfiram                                | 279.04711  | 423.199 | 296.0509 | 13.0593 | 4<br>C9H10C12N        | C01692 | [M+H-20] <sup>+</sup> | GNPS      | 0.77884 | pos | 1 | 46488231.4 |
| M232T332 |                                           | 232.020155 | 332.2   | 232.017  | 13.5965 | 20                    | C18428 | [M] <sup>+</sup>      | MoNA      | 0.99998 | pos | 1 | 3373787.57 |
| M171T232 | Diuron<br>DL-Glycerol 1-<br>phosphate     | 171.010642 | 231.973 | 172.0137 | 24.6674 | C3H9O6P<br>C8H16N2O4  | C03189 | [M-H] <sup>-</sup>    | mzCloud   | 0.00214 | neg | 2 | 739067.448 |
| M267T149 |                                           | 267.046079 | 148.981 | 268.0551 | 6.53428 | S2                    | C01817 | [M-H] <sup>-</sup>    | MoNA      | 0.67348 | neg | 1 | 5022572.5  |
| M197T185 | DNOC                                      | 197.021033 | 185.252 | 198.0277 | 3.09079 | C7H6N2O5              | C18653 | [M-H] <sup>-</sup>    | mzCloud   | 0.76573 | neg | 1 | 5104361.26 |
| M301T570 | Dobutamine<br>Docosahexaenoic<br>acid     | 301.163131 | 570.01  | 301.1678 | 15.4835 | C18H23NO3             | C06967 | [M] <sup>+</sup>      | mzCloud   | 0.82282 | pos | 1 | 4708961.77 |
| M328T335 | Dodecanedioic<br>acid                     | 328.196903 | 334.966 | 328.2402 | 6.82072 | C22H32O2              | C06429 | [M] <sup>+</sup>      | BioDeepDB | 0.74652 | pos | 1 | 13155049.7 |
| M229T546 |                                           | 229.143446 | 546.308 | 230.1518 | 4.59963 | C12H22O4              | C02678 | [M-H] <sup>-</sup>    | BioDeepDB | 5.2E-06 | neg | 2 | 27866582.2 |



|                            |                                      |                          |                    |                      |                    |                                    |                  |                                              |                   |                    |            |        |                          |
|----------------------------|--------------------------------------|--------------------------|--------------------|----------------------|--------------------|------------------------------------|------------------|----------------------------------------------|-------------------|--------------------|------------|--------|--------------------------|
| M200T36                    | Dodecanoic acid                      | 199.987368               | 35.8675            | 200.1776             | 0.00724            | C12H24O2<br>C19H27N3O              | C02679           | [M] <sup>+</sup>                             | BioDeepDB         | 0.00014            | pos        | 2      | 342965785                |
| M441T203                   | Dofetilide                           | 441.136869               | 203.346            | 441.1392             | 5.28295            | 5S2                                | C07751           | [M] <sup>-</sup>                             | MoNA              | 0.64077            | neg        | 1      | 483036.81                |
| M312T293                   | Domoic acid                          | 312.1424                 | 292.623            | 311.1369             | 5.65066            | C15H21N06                          | C13732           | [M+H] <sup>+</sup>                           | MoNA              | 0.67982            | pos        | 1      | 7724725.55               |
| M152T394                   | Dopamine                             | 152.06913                | 394.467            | 153.079              | 16.92              | C8H11N02<br>C23H25N5O              | C03758           | [M-H] <sup>-</sup>                           | MoNA              | 1.9E-06            | neg        | 2      | 15970007.2               |
| M432T732                   | Doxazosin                            | 432.169774               | 731.793            | 451.1856             | 5.93332            | 5<br>C27H29N01                     | C06970           | [M-H2O-H] <sup>-</sup>                       | MoNA              | 0.71624            | neg        | 1      | 4094746.14               |
| M543T746                   | Doxorubicin                          | 543.185                  | 745.747            | 543.1741             | 20.0675            | 1<br>C22H24N2O                     | C01661           | [M] <sup>-</sup>                             | MoNA              | 0.83862            | neg        | 1      | 345478.682               |
| M443T394                   | Doxycycline                          | 443.143256               | 394.467            | 444.1533             | 6.16997            | 8<br>C22H22FN3                     | C06973           | [M-H] <sup>-</sup>                           | MoNA              | 0.76823            | neg        | 1      | 446631.487               |
| M379T308                   | Droperidol                           | 379.168777               | 307.616            | 379.1696             | 2.18299            | O2<br>C10H16N2O                    | C06974           | [M] <sup>-</sup>                             | MoNA              | 0.99105            | neg        | 1      | 6041687.49               |
| M401T442                   | dTDP                                 | 401.022971               | 442.399            | 402.0229             | 18.2405            | 11P2<br>C10H15N2O                  | C00363           | [M-H] <sup>-</sup>                           | MoNA              | 0.91686            | neg        | 1      | 3665233.55               |
| M322T280                   | dTMP                                 | 322.057517               | 280.345            | 322.0566             | 2.84755            | 8P<br>C9H13N2O8                    | C00364           | [M] <sup>+</sup>                             | BioDeepDB         | 0.638              | pos        | 1      | 2971070.61               |
| M291T263<br>M290T706<br>_2 | dUMP<br>Dyclonine                    | 291.033564<br>290.210649 | 262.529<br>706.229 | 308.041<br>289.2042  | 0.00659<br>2.84855 | P<br>C18H27N02<br>C10H14N4O        | C00365<br>C07881 | [M+H-H2O] <sup>+</sup><br>[M+H] <sup>+</sup> | MoNA<br>BioDeepDB | 0.60084<br>0.70344 | pos<br>pos | 1<br>1 | 1062126.08<br>20164634.7 |
| M254T502                   | Dyphylline                           | 254.100749               | 501.549            | 254.1015             | 2.95492            | 4<br>C21H27N3O                     | C07819           | [M] <sup>+</sup>                             | GNPS              | 0.86194            | pos        | 1      | 18416605.2               |
| M401T398                   | E-4031                               | 401.178972               | 397.585            | 401.1773             | 4.16826            | 3S                                 | C13776           | [M] <sup>-</sup>                             | MoNA              | 0.99515            | neg        | 1      | 965429.199               |
| M186T107<br>M200T104<br>_2 | Ecgonine<br>Ecgonine methyl<br>ester | 186.11298<br>200.127527  | 106.513<br>104.493 | 185.1052<br>199.1208 | 2.70825<br>2.74273 | C9H15N03<br>C10H17N03<br>C18H15C13 | C10858<br>C12448 | [M+H] <sup>+</sup><br>[M+H] <sup>+</sup>     | MoNA<br>MoNA      | 0.00011<br>1.1E-06 | pos<br>pos | 2<br>2 | 81623671.9<br>192705965  |
| M380T741                   | Econazole                            | 380.024064               | 741.302            | 380.025              | 2.46416            | N2O                                | C08068           | [M] <sup>+</sup>                             | BioDeepDB         | 0.67173            | pos        | 1      | 7479700.83               |
| M142T156                   | Ectoine                              | 142.073263               | 156.393            | 142.0742             | 6.5937             | C6H10N2O2<br>C14H15O2P             | C06231           | [M] <sup>+</sup>                             | MoNA              | 0.99807            | pos        | 1      | 9484465.3                |
| M278T777                   | Edifenphos                           | 278.182167               | 777.245            | 310.0251             | 29.3283            | S2                                 | C14436           | [M+H] <sup>+</sup>                           | MoNA              | 0.87041            | pos        | 1      | 669656312                |

|                            |                             |            |         |          |         |                       |        |                                     |           |         |     |   |            |
|----------------------------|-----------------------------|------------|---------|----------|---------|-----------------------|--------|-------------------------------------|-----------|---------|-----|---|------------|
| M149T500<br>_2             | Edrophonium                 | 149.116914 | 500.045 | 166.1232 | 7.69827 | C10H16NO<br>C14H9C1F3 | C06976 | [M+H <sub>2</sub> O] <sup>+</sup>   | mzCloud   | 0.67767 | pos | 1 | 821546.882 |
| M316T211                   | Efavirenz                   | 316.033253 | 211.288 | 315.0274 | 4.47332 | N02                   | C08088 | [M+H] <sup>+</sup>                  | MoNA      | 0.99564 | pos | 1 | 2337705.12 |
| M209T666                   | Elemicin                    | 209.116279 | 666.137 | 208.1099 | 4.28972 | C12H16O3              | C10451 | [M+H] <sup>+</sup>                  | BioDeepDB | 0.75175 | pos | 1 | 4643050.76 |
| M302T84                    | Ellagic acid                | 302.002686 | 83.5661 | 302.0063 | 11.8572 | C14H6O8               | C10788 | [M] <sup>+</sup>                    | mzCloud   | 0.77342 | pos | 1 | 5414804.88 |
| M246T597                   | Ellipticine                 | 246.112985 | 596.628 | 246.1157 | 11.0235 | C17H14N2<br>C8H10FN3O | C09154 | [M] <sup>+</sup>                    | OTCML     | 0.82455 | pos | 1 | 7505413.43 |
| M228T321                   | Emtricitabine               | 228.024582 | 321.312 | 247.0427 | 1.19289 | 3S<br>C20H28N2O       | C12599 | [M-H <sub>2</sub> O-H] <sup>-</sup> | MoNA      | 0.98831 | neg | 1 | 624405.276 |
| M357T834                   | Enalapril                   | 357.180221 | 833.866 | 376.1998 | 3.32912 | 5<br>C18H24N2O        | C06977 | [M-H <sub>2</sub> O-H] <sup>-</sup> | BioDeepDB | 0.61088 | neg | 1 | 2049677.12 |
| M349T343<br>M620T606<br>_2 | Enalaprilat                 | 349.174732 | 343.226 | 348.1685 | 2.98929 | 5<br>C33H57N3O        | C11720 | [M+H] <sup>+</sup>                  | mzCloud   | 0.67042 | pos | 1 | 4232716.82 |
|                            | Enniatin B                  | 620.385768 | 606.096 | 639.4095 | 8.61014 | 9<br>C15H17FN4        | C15740 | [M-H <sub>2</sub> O-H] <sup>-</sup> | GNPS      | 0.99926 | neg | 1 | 2246470.51 |
| M321T104<br>M306T438<br>_1 | Enoxacin                    | 321.140102 | 104.493 | 320.1285 | 13.5682 | O3<br>C14H15N3O       | C06979 | [M+H] <sup>+</sup>                  | mzCloud   | 0.73875 | pos | 1 | 90861258.6 |
|                            | Entacapone                  | 306.110369 | 437.571 | 305.1012 | 6.18284 | 5                     | C07943 | [M+H] <sup>+</sup>                  | GNPS      | 0.80357 | pos | 1 | 5882994.88 |
| M301T514                   | Enterodiol                  | 301.145176 | 513.768 | 302.1518 | 2.16478 | C18H22O4              | C18166 | [M-H] <sup>-</sup>                  | BioDeepDB | 2E-06   | neg | 2 | 3176097.41 |
| M303T756                   | EPA (d5)                    | 303.230925 | 755.537 | 302.2246 | 3.13634 | C20H30O2              | C06428 | [M+H] <sup>+</sup>                  | mzCloud   | 0.64605 | pos | 1 | 13558014.8 |
| M166T448                   | Ephedrine                   | 166.122071 | 447.531 | 165.1154 | 3.64062 | C10H15NO              | C01575 | [M+H] <sup>+</sup>                  | mzCloud   | 0.61557 | pos | 1 | 19318805.1 |
| M271T837                   | Epiandrosterone             | 271.227066 | 836.769 | 290.2246 | 1.86215 | C19H30O2              | C07635 | [M-H <sub>2</sub> O-H] <sup>-</sup> | BioDeepDB | 0.63018 | neg | 1 | 11800857.6 |
| M289T447                   | Epicatechin                 | 289.072165 | 446.967 | 290.079  | 1.3924  | C15H14O6              | C09727 | [M-H] <sup>-</sup>                  | GNPS      | 0.59808 | neg | 1 | 475618.364 |
| M439T68                    | Epigallocatechin<br>gallate | 439.070511 | 67.6441 | 458.0849 | 9.11165 | C22H18O11             | C09731 | [M-H <sub>2</sub> O-H] <sup>-</sup> | BioDeepDB | 0.84931 | neg | 1 | 7517830.28 |
| M184T475                   | Epinephrine                 | 184.096618 | 475.007 | 183.0895 | 0.86016 | C9H13NO3<br>C23H24N2O | C00788 | [M+H] <sup>+</sup>                  | BioDeepDB | 0.5851  | pos | 1 | 21038028.4 |
| M405T724                   | Eprosartan                  | 405.135031 | 724.158 | 424.1457 | 19.0568 | 4S                    | C07467 | [M-H <sub>2</sub> O-H] <sup>-</sup> | MoNA      | 0.84831 | neg | 1 | 962362.775 |

|          |                              |            |         |          |         |             |        |                        |           |             |   |            |
|----------|------------------------------|------------|---------|----------|---------|-------------|--------|------------------------|-----------|-------------|---|------------|
| M114T653 | Epsilon-caprolactam epsilon- | 114.091559 | 653.147 | 113.0841 | 1.60385 | C6H11NO     | C06593 | [M+H] <sup>+</sup>     | BioDeepDB | 1E-07 pos   | 2 | 103707613  |
| M454T472 | Viniferin                    | 454.132672 | 471.768 | 454.1416 | 19.6587 | C28H22O6    | C10289 | [M] <sup>-</sup>       | MoNA      | 1 neg       | 1 | 880471.153 |
| M241T715 | Equol                        | 241.086969 | 714.841 | 242.0943 | 0.22641 | C15H14O3    | C14131 | [M-H] <sup>-</sup>     | BioDeepDB | 0.5807 neg  | 1 | 2026778    |
| M325T835 | Ergonovine                   | 325.1815   | 835.329 | 325.179  | 7.68761 | C19H23N3O   | C07543 | [M] <sup>-</sup>       | MoNA      | 0.65181 neg | 1 | 899285.753 |
| M231T271 | Ergothioneine                | 231.105022 | 270.983 | 230.0963 | 6.25875 | C9H16N3O2 S | C05570 | [M+H] <sup>+</sup>     | BioDeepDB | 0.66896 pos | 1 | 23405473.2 |
| M595T503 | Eriocitrin                   | 595.163862 | 502.873 | 596.1741 | 4.97603 | C27H32O15   | C09732 | [M-H] <sup>-</sup>     | mzCloud   | 0.66755 neg | 1 | 2385380.45 |
| M287T631 | Eriodictyol                  | 287.055109 | 630.737 | 288.0634 | 3.53764 | C15H12O6    | C05631 | [M-H] <sup>-</sup>     | mzCloud   | 0.61018 neg | 1 | 633418.996 |
| M337T808 | Erucic acid                  | 337.200852 | 808.251 | 338.3185 | 13.5292 | C22H42O2    | C08316 | [M-H] <sup>-</sup>     | BioDeepDB | 1.8E-05 neg | 2 | 1053508.64 |
| M121T258 | Erythritol                   | 121.047449 | 258.208 | 122.0579 | 16.8751 | C4H10O4     | C00503 | [M-H] <sup>-</sup>     | BioDeepDB | 0.73875 neg | 1 | 483263.812 |
| M179T463 | Esculetin                    | 179.033392 | 463.271 | 178.0266 | 2.75137 | C9H6O4      | C09263 | [M+H] <sup>+</sup>     | OTCML     | 1.4E-10 pos | 2 | 11257954.5 |
| M296T525 | Esmolol                      | 296.184706 | 525.132 | 295.1784 | 3.27343 | C16H25NO4   | C06980 | [M+H] <sup>+</sup>     | mzCloud   | 0.68566 pos | 1 | 11444297.8 |
| M295T180 | Estazolam                    | 295.077573 | 179.75  | 294.0672 | 10.4953 | C16H11ClN   | C06981 | [M+H] <sup>+</sup>     | mzCloud   | 0.74375 pos | 1 | 7541795.66 |
| M273T751 | Estradiol                    | 273.252059 | 751.333 | 272.1776 | 6.98286 | C18H24O2    | C00951 | [M+H] <sup>+</sup>     | BioDeepDB | 0.64428 pos | 1 | 43023834   |
| M395T801 | 17beta-Estradiol-17beta      | 395.26491  | 800.683 | 396.2664 | 14.4449 | C26H36O3    | C14640 | [M-H] <sup>-</sup>     | BioDeepDB | 0.99999 neg | 1 | 2065905.43 |
| M351T813 | 3-sulfate Estriol-16-        | 351.122669 | 812.68  | 352.1344 | 12.6866 | C18H24O5S   | C08357 | [M-H] <sup>-</sup>     | BioDeepDB | 0.71839 neg | 1 | 2343244.94 |
| M447T760 | Glucuronide                  | 447.197646 | 759.605 | 464.2046 | 1.07258 | C24H32O9    | C05504 | [M+H-2O] <sup>+</sup>  | MoNA      | 0.64331 pos | 1 | 5215244.02 |
| M445T767 | Estrone glucuronide          | 445.189601 | 767.145 | 446.1941 | 6.2387  | C24H30O8    | C11133 | [M-H] <sup>-</sup>     | GNPS      | 0.69087 neg | 1 | 2577378.44 |
| M331T394 | Estrone sulfate              | 331.102276 | 394.467 | 350.1188 | 5.63622 | C18H22O5S   | C02538 | [M-2H0-H] <sup>-</sup> | BioDeepDB | 0.94737 neg | 1 | 2146392.05 |
| M204T545 | Ethambutol                   | 204.183374 | 545.203 | 204.1838 | 2.08488 | C10H24N2O   | C06984 | [M] <sup>+</sup>       | MoNA      | 0.83854 pos | 1 | 67687474.2 |

|          |                              | C11H15NO2  |         |          |         |                        |        |            |           |         |     |   |            |
|----------|------------------------------|------------|---------|----------|---------|------------------------|--------|------------|-----------|---------|-----|---|------------|
| M224T730 | Ethiofencarb                 | 224.075678 | 730.264 | 225.0823 | 2.69592 | S                      | C18649 | [M-H]-     | GNPS      | 0.68275 | neg | 1 | 14062317   |
| M166T557 | Ethionamide                  | 166.057678 | 557.078 | 166.0565 | 7.09491 | C8H10N2S<br>C8H19O2PS  | C07665 | [M]-       | BioDeepDB | 0.67106 | neg | 1 | 1618357.19 |
| M242T588 | Ethoprophos                  | 242.056179 | 587.521 | 242.0564 | 0.91489 | 2                      | C18687 | [M]+       | MoNA      | 0.98745 | pos | 1 | 5671140.25 |
| M122T262 | Ethosuximide<br>Ethyl        | 122.059619 | 262.302 | 141.079  | 8.12008 | C7H11NO2               | C07505 | [M-H2O-H]- | BioDeepDB | 0.99905 | neg | 1 | 341448.775 |
| M313T562 | icosapentate<br>Ethyl p-     | 313.251668 | 561.955 | 330.2559 | 10.2221 | C22H34O2               | C16184 | [M+H2O]+   | BioDeepDB | 0.89593 | pos | 1 | 33579828.2 |
| M189T95  | methoxycinnamate             | 189.086198 | 94.7467 | 206.0943 | 3.50223 | C12H14O3               | C10476 | [M+H2O]+   | OTCML     | 0.63878 | pos | 1 | 25708254.1 |
| M103T708 | Ethylenethiourea             | 103.032746 | 707.557 | 102.0252 | 2.62344 | C3H6N2S                | C14398 | [M+H]+     | MoNA      | 0.99212 | pos | 1 | 10111488.3 |
| M102T698 | Ethylmethylacetic<br>_2 acid | 102.067307 | 697.952 | 102.0681 | 7.77403 | C5H10O2                | C18319 | [M]+       | BioDeepDB | 0.65094 | pos | 1 | 3513885.55 |
| M296T604 | Ethylmorphine                | 296.162819 | 603.95  | 313.1678 | 8.28176 | C19H23NO3              | C07537 | [M+H2O]+   | mzCloud   | 0.66089 | pos | 1 | 1650782.54 |
| M287T784 | Etodolac                     | 287.146509 | 783.78  | 287.1521 | 19.4724 | C17H21NO3<br>C14H16N2O | C06991 | [M]+       | MoNA      | 0.80293 | pos | 1 | 22203464.9 |
| M244T408 | Etomidate                    | 244.121574 | 408.368 | 244.1212 | 1.53211 | 2                      | C07522 | [M]-       | BioDeepDB | 0.90265 | neg | 1 | 1280691.35 |
| M587T446 | Etoposide                    | 587.175903 | 445.522 | 588.1843 | 1.52777 | C29H32O13<br>C21H23F2N | C01576 | Unknown    | OTCML     | 0.851   | neg | 1 | 200229.918 |
| M360T334 | Etozazole                    | 360.183312 | 333.715 | 359.1697 | 17.5906 | 02                     | C18495 | [M+H]+     | mzCloud   | 0.93004 | pos | 1 | 3545910.96 |
| M155T66  | Eucalyptol                   | 155.14233  | 65.7101 | 154.1358 | 3.69361 | C10H18O                | C09844 | [M+H]+     | BioDeepDB | 0.03864 | pos | 2 | 3600254.62 |
| M343T770 | Eupatilin                    | 343.079057 | 770.235 | 344.0896 | 9.52141 | C18H16O7               | C10040 | [M-H]-     | MoNA      | 0.72217 | neg | 1 | 1537474.93 |
| M347T532 | Eurycomalactone              | 347.148371 | 532.372 | 348.1573 | 3.82787 | C19H24O6               | C08759 | Unknown    | OTCML     | 2.7E-07 | neg | 2 | 21185277.4 |
| M228T321 | Euxanthone                   | 228.044229 | 321.198 | 228.0423 | 8.4575  | C13H8O4                | C10061 | [M]+       | GNPS      | 0.9992  | pos | 1 | 2887608.18 |
| M330T305 | Evoxine                      | 330.128224 | 304.777 | 347.1369 | 3.76135 | C18H21NO6              | C10670 | [M+H2O]+   | BioDeepDB | 0.99445 | pos | 1 | 6119417.91 |
| M279T494 | Exemestane                   | 279.170007 | 494.289 | 296.1776 | 0.57111 | C20H24O2               | C08162 | [M+H2O]+   | MoNA      | 0.83927 | pos | 1 | 50437363.3 |

|          |               |            |         |          |         |                        |        |                        |           |         |     |   |            |
|----------|---------------|------------|---------|----------|---------|------------------------|--------|------------------------|-----------|---------|-----|---|------------|
| M261T800 | Falcarindiol  | 261.186129 | 800.484 | 260.1776 | 4.68409 | C17H24O2<br>C8H15N7O2  | C08449 | [M+H] <sup>+</sup>     | MoNA      | 0.64892 | pos | 1 | 464994488  |
| M337T240 | Famotidine    | 337.043141 | 239.574 | 337.0449 | 5.32131 | S3<br>C22H18N2O        | C06994 | [M] <sup>-</sup>       | BioDeepDB | 0.99679 | neg | 1 | 358824.386 |
| M373T568 | Famoxadone    | 373.126242 | 567.543 | 374.1267 | 18.2713 | 4                      | C18591 | [M-H] <sup>-</sup>     | mzCloud   | 0.90054 | neg | 1 | 1220223.47 |
| M153T635 | FAPy-adenine  | 153.0619   | 635.022 | 153.0651 | 20.9083 | C5H7N5O                | C06502 | [M] <sup>+</sup>       | BioDeepDB | 0.92529 | pos | 1 | 1047305.32 |
| M345T338 | Fastigilin B  | 345.17424  | 337.767 | 362.1729 | 25.4177 | C20H26O6<br>C11H14N2O  | C09451 | [M+H-H2O] <sup>+</sup> | BioDeepDB | 1       | pos | 1 | 5934839.57 |
| M239T459 | Felbamate     | 239.10212  | 458.985 | 238.0954 | 2.14646 | 4<br>C13H22NO3         | C07501 | [M+H] <sup>+</sup>     | MoNA      | 0.88039 | pos | 1 | 1870558.38 |
| M302T280 | Fenamiphos    | 302.097496 | 280.275 | 303.1058 | 3.32242 | PS                     | C18659 | [M-H] <sup>-</sup>     | BioDeepDB | 0.64641 | neg | 1 | 432951.293 |
| M202T458 | Fenfuram      | 202.085684 | 457.576 | 201.079  | 2.93179 | C12H11NO2<br>C14H17C12 | C18833 | [M+H] <sup>+</sup>     | mzCloud   | 0.62038 | pos | 1 | 5021308.21 |
| M282T284 | Fenhexamid    | 282.045741 | 283.634 | 301.0636 | 1.88412 | N02<br>C9H12NO5P       | C18593 | [M-H2O-H] <sup>-</sup> | mzCloud   | 0.68213 | neg | 1 | 599270.467 |
| M277T64  | Fenitrothion  | 277.011168 | 64.0412 | 277.0174 | 22.498  | S<br>C20H21C1O         | C14442 | [M] <sup>-</sup>       | BioDeepDB | 0.99918 | neg | 1 | 270003.79  |
| M343T524 | Fenofibrate   | 343.102108 | 523.735 | 360.1128 | 9.49609 | 4<br>C16H16C1N         | C07586 | [M+H-H2O] <sup>+</sup> | MoNA      | 0.91421 | pos | 1 | 3682249.94 |
| M305T743 | Fenoldopam    | 305.079424 | 742.631 | 305.0819 | 8.11697 | 03                     | C07693 | [M] <sup>-</sup>       | MoNA      | 0.73049 | neg | 1 | 4695437.43 |
| M242T583 | Fenoprofen    | 242.092708 | 583.068 | 242.0943 | 6.57643 | C15H14O3               | C06997 | [M] <sup>+</sup>       | GNPS      | 0.84358 | pos | 1 | 4041235.76 |
| M301T151 | Fenoxycarb    | 301.122568 | 150.528 | 301.1314 | 29.3292 | C17H19NO4<br>C24H27N3O | C11078 | [M] <sup>-</sup>       | BioDeepDB | 1       | neg | 1 | 5283052.95 |
| M422T662 | Fenpyroximate | 422.215745 | 661.979 | 421.2002 | 19.5857 | 4<br>C10H15O3P         | C11098 | [M+H] <sup>+</sup>     | mzCloud   | 0.93717 | pos | 1 | 37680937.1 |
| M279T210 | Fenthion      | 279.02794  | 210.186 | 278.02   | 2.29806 | S2                     | C14420 | [M+H] <sup>+</sup>     | MoNA      | 0.83323 | pos | 1 | 1875315.17 |
| M165T426 | Fenuron       | 165.102015 | 425.909 | 164.095  | 1.35656 | C9H12N2O<br>C25H22C1N  | C11224 | [M+H] <sup>+</sup>     | MoNA      | 0.9888  | pos | 1 | 4081314.13 |
| M419T328 | Fenvalerate   | 419.128997 | 328.106 | 419.1288 | 0.4188  | 03                     | C10988 | [M] <sup>+</sup>       | mzCloud   | 0.58082 | pos | 1 | 3306674.38 |
| M237T698 | Ferimzone     | 237.147079 | 697.952 | 254.1531 | 5.95775 | C15H18N4               | C18579 | [M+H-H2O] <sup>+</sup> | MoNA      | 0.99749 | pos | 1 | 3358127.16 |

|                      |                            |            |         |          |         |           |           |        |                       |           |         |       |   |            |
|----------------------|----------------------------|------------|---------|----------|---------|-----------|-----------|--------|-----------------------|-----------|---------|-------|---|------------|
| M614T746<br>_2       | Ferroxamine                | 614.269478 | 745.603 | 613.2648 | 4.22987 | 608       | C25H45FeN | C07597 | [M+H] <sup>+</sup>    | GNPS      | 0.99525 | pos   | 1 | 14720604.2 |
| M502T832             | Fexofenadine               | 502.29083  | 831.709 | 501.2879 | 8.65311 | C32H39NO4 |           | C06999 | [M+H] <sup>+</sup>    | MoNA      | 0.66401 | pos   | 1 | 3525279.66 |
| M286T772<br>M749T649 | Fisetin                    | 286.272154 | 772.206 | 286.048  | 8.64217 | C15H10O6  |           | C10041 | [M] <sup>+</sup>      | BioDeepDB | 0.00535 | pos   | 2 | 48105936.9 |
| _1                   | Flaccidin B                | 749.465627 | 649.338 | 748.4398 | 24.753  | C41H64O12 |           | C08943 | [M+H] <sup>+</sup>    | MetaDNA   | 0.03092 | pos   | 2 | 108114704  |
| M225T471             | Flavanone                  | 225.094691 | 470.602 | 224.0837 | 15.5112 | C15H12O2  |           | C00766 | [M+H] <sup>+</sup>    | OTCML     |         | 1 pos | 1 | 3368126.88 |
| M413T701             | Flecainide                 | 413.127638 | 701.149 | 414.1378 | 6.98574 | 203       | C17H20F6N | C07001 | [M-H] <sup>-</sup>    | MoNA      | 0.75277 | neg   | 1 | 8323073.59 |
| M245T261             | Floxuridine                | 245.059014 | 261.138 | 246.0652 | 4.44755 | 5         | C9H11FN2O | C11736 | [M-H] <sup>-</sup>    | BioDeepDB | 0.9956  | neg   | 1 | 322050.752 |
| M310T668             | Fluazifop                  | 310.067919 | 667.609 | 327.0718 | 11.4586 | 04        | C15H12F3N | C18527 | [M+H-2O] <sup>+</sup> | MoNA      | 0.99987 | pos   | 1 | 47196670.3 |
| M306T466             | Fluconazole                | 306.104322 | 465.575 | 306.1041 | 0.72553 | 60        | C13H12F2N | C07002 | [M] <sup>-</sup>      | mzCloud   | 0.62902 | neg   | 1 | 339861.147 |
| M248T72              | Fludioxonil                | 248.038975 | 72.0941 | 248.0397 | 2.92157 | 02        | C12H6F2N2 | C18462 | [M] <sup>-</sup>      | BioDeepDB | 0.99278 | neg   | 1 | 6233219.35 |
| M423T741             | Fludrocortisone            | 423.221156 | 741.302 | 380.1999 | 8.06499 | C21H29F05 |           | C07004 | [M+H] <sup>+</sup>    | MoNA      | 0.00112 | pos   | 2 | 12170737.8 |
| M423T394             | Fludrocortisone<br>acetate | 423.21705  | 393.934 | 422.2105 | 1.53514 | C23H31F06 |           | C08186 | [M+H] <sup>+</sup>    | BioDeepDB | 0.98932 | pos   | 1 | 10854642.4 |
| M281T318             | Flufenamic acid            | 281.065563 | 318.232 | 281.0664 | 2.97734 | 02        | C14H10F3N | C13038 | [M] <sup>-</sup>      | BioDeepDB | 0.99291 | neg   | 1 | 12231976.4 |
| M303T616<br>M409T537 | Flumazenil                 | 303.101644 | 615.594 | 303.1019 | 0.84361 | 03        | C15H14FN3 | C07825 | [M] <sup>+</sup>      | GNPS      | 0.75244 | pos   | 1 | 6065645.76 |
| _1                   | Flumetasone                | 409.183182 | 537.051 | 410.1905 | 0.10246 | 5         | C22H28F2O | C14479 | [M-H] <sup>-</sup>    | BioDeepDB | 0.98472 | neg   | 1 | 83649109.5 |
| M326T314             | Flumetsulam                | 326.047406 | 314.259 | 325.0445 | 13.404  | 02S       | C12H9F2N5 | C18852 | [M+H] <sup>+</sup>    | BioDeepDB | 0.99997 | pos   | 1 | 965320.699 |
| M353T450             | Flumioxazin                | 353.093822 | 450.052 | 354.1016 | 1.42104 | 04        | C19H15FN2 | C11035 | [M-H] <sup>-</sup>    | mzCloud   | 0.85599 | neg   | 1 | 1168958.49 |
| M434T672             | Flunisolide                | 434.210892 | 671.649 | 434.2105 | 0.90301 | C24H31F06 |           | C07005 | [M] <sup>+</sup>      | mzCloud   | 0.71723 | pos   | 1 | 3568192.02 |
| M477T641             | Fluocinonide               | 477.205918 | 640.717 | 494.2116 | 3.67057 | 7         | C26H32F2O | C07007 | [M+H-2O] <sup>+</sup> | GNPS      | 0.76526 | pos   | 1 | 1540862.64 |

|          |              |            |         |          |         |                       |           |                                       |                  |         |         |     |            |           |
|----------|--------------|------------|---------|----------|---------|-----------------------|-----------|---------------------------------------|------------------|---------|---------|-----|------------|-----------|
| M232T165 | Fluometuron  | 232.079325 | 165.217 | 232.0823 | 12.82   | 20                    | C10H11F3N | C18853                                | [M] <sup>+</sup> | mzCloud | 0.93045 | pos | 1          | 164656430 |
| M167T268 | Fluorene     | 167.086818 | 268.427 | 166.0783 | 7.4352  | C13H10                | C07715    | [M+H] <sup>+</sup>                    | MoNA             | 0.99867 | pos     | 1   | 9807288.83 |           |
| M131T818 | Fluorouracil | 131.023409 | 818.418 | 130.0179 | 13.1489 | C4H3FN2O2             | C07649    | [M+H] <sup>+</sup>                    | MoNA             | 0.9577  | pos     | 1   | 9346559.69 |           |
| M292T111 | Fluperlapine | 292.154521 | 111.382 | 309.1641 | 7.3424  | C19H20FN3             | C10967    | [M+H-H2O] <sup>+</sup>                | GNPS             | 0.99862 | pos     | 1   | 211008124  |           |
| M436T674 | Fluphenazine | 436.169103 | 673.771 | 437.1749 | 3.39002 | 30S<br>C21H23ClF      | C07010    | [M-H] <sup>-</sup>                    | MoNA             | 0.73537 | neg     | 1   | 4967314.52 |           |
| M370T317 | Flurazepam   | 370.14798  | 317.199 | 387.1514 | 10.931  | N3O                   | C07012    | [M+H-H2O] <sup>+</sup>                | BioDeepDB        | 0.99981 | pos     | 1   | 7598625.41 |           |
| M243T353 | Flurbiprofen | 243.083856 | 353.163 | 244.09   | 4.65565 | C15H13FO2             | C07013    | [M-H] <sup>-</sup>                    | mzCloud          | 0.7278  | neg     | 1   | 2508815.31 |           |
| M226T93  | Flurecol     | 226.062969 | 92.9618 | 226.063  | 0.13789 | C14H10O3<br>C11H11F3N | C18856    | [M] <sup>-</sup>                      | MoNA             | 0.98484 | neg     | 1   | 278942455  |           |
| M276T329 | Flutamide    | 276.072296 | 328.999 | 276.0722 | 0.34807 | 203<br>C17H16F3N      | C07653    | [M] <sup>-</sup>                      | mzCloud          | 0.66912 | neg     | 1   | 1031616.9  |           |
| M304T379 | Flutolanil   | 304.102519 | 379.066 | 323.1133 | 25.0203 | O2<br>C16H13F2N       | C18502    | [M-H2O-H] <sup>-</sup>                | mzCloud          | 0.99968 | neg     | 1   | 922981.011 |           |
| M284T708 | Flutriafol   | 284.096473 | 707.557 | 301.1027 | 4.24693 | 30<br>C24H26FNO       | C18734    | [M+H-H2O] <sup>+</sup>                | mzCloud          | 0.69381 | pos     | 1   | 2139050.35 |           |
| M410T601 | Fluvastatin  | 410.176094 | 601.473 | 411.1846 | 2.93922 | 4<br>C15H21F3N        | C07014    | [M-H] <sup>-</sup>                    | BioDeepDB        | 0.78787 | neg     | 1   | 710606.871 |           |
| M319T455 | Fluvoxamine  | 319.164287 | 454.739 | 318.1555 | 4.69574 | 202<br>C21H31N3O      | C07571    | [M+H] <sup>+</sup>                    | MoNA             | 0.90974 | pos     | 1   | 2813014.98 |           |
| M436T438 | FMLP         | 436.178611 | 437.734 | 437.1984 | 28.687  | 5S<br>C17H21N4O       | C11596    | [M-H] <sup>-</sup>                    | BioDeepDB        | 1       | neg     | 1   | 531100.464 |           |
| M455T93  | FMN          | 455.0962   | 92.9618 | 456.1046 | 2.47069 | 9P<br>C19H19N7O       | C00061    | [M-H] <sup>-</sup>                    | mzCloud          | 0.60307 | neg     | 1   | 11453698.9 |           |
| M422T396 | Folic acid   | 422.122025 | 396.023 | 441.1397 | 1.69425 | 6                     | C00504    | [M-H2O-H] <sup>-</sup><br>[M+2ACN+2H] | GNPS             | 0.59295 | neg     | 1   | 1056888.85 |           |
| M83T791  | Fomepizole   | 83.0602075 | 790.802 | 82.0531  | 1.99261 | C4H6N2                | C07837    | ]2+                                   | MoNA             | 1.8E-05 | pos     | 2   | 494424586  |           |
| M267T738 | Formononetin | 267.067802 | 737.955 | 268.0736 | 5.19423 | C16H12O4<br>C19H24N2O | C00858    | [M-H] <sup>-</sup>                    | BioDeepDB        | 9.6E-11 | neg     | 2   | 10518248.1 |           |
| M327T361 | Formoterol   | 327.166494 | 360.794 | 344.1736 | 1.00281 | 4                     | C07805    | [M+H-H2O] <sup>+</sup>                | mzCloud          | 0.73794 | pos     | 1   | 17907145.9 |           |

|            |                           |            |         |          |         |                        |        |             |           |         |     |   |            |
|------------|---------------------------|------------|---------|----------|---------|------------------------|--------|-------------|-----------|---------|-----|---|------------|
| M164T681   | Formylanthranilic acid    | 164.033863 | 681.406 | 165.0426 | 8.76224 | C8H7N03                | C05653 | [M-H]-      | BioDeepDB | 0.78827 | neg | 1 | 1647888.06 |
| M393T374   | Forskolin                 | 393.221824 | 373.532 | 410.2305 | 3.03911 | C22H34O7               | C09076 | [M+H-2H2O]+ | OTCML     | 0.99304 | pos | 1 | 8670632.41 |
| M623T466_2 | Forsythiaside             | 623.190797 | 465.575 | 624.2054 | 11.2371 | C29H36O15              | C10456 | Unknown     | OTCML     | 9.4E-08 | neg | 2 | 2856139.94 |
| M533T543   | Forsythin                 | 533.205957 | 543.216 | 534.2101 | 5.85351 | C27H34O11<br>C30H46N07 | C17048 | [M-H]-      | MoNA      | 0.99739 | neg | 1 | 323285.642 |
| M562T816   | Fosinopril                | 562.310636 | 815.664 | 563.3012 | 29.7209 | P                      | C07016 | [M-H]-      | MoNA      | 0.84446 | neg | 1 | 5316889.21 |
| M208T386   | Fraxetin                  | 208.038661 | 386.352 | 208.0372 | 7.15035 | C10H8O5                | C09265 | [M]+        | OTCML     | 5.6E-08 | pos | 2 | 19094054.8 |
| M370T197   | Fraxin                    | 370.088934 | 197.335 | 370.09   | 2.87237 | C16H18O10              | C09266 | [M]-        | mzCloud   | 0.68431 | neg | 1 | 2661403.41 |
| M339T829   | Fructose 1,6-bisphosphate | 339.197503 | 829.321 | 339.996  | 6.58855 | 2                      | C00354 | [M-H]-      | BioDeepDB | 2.4E-07 | neg | 2 | 17537383.2 |
| M180T207   | Fructose-1P               | 180.085993 | 207.393 | 180.0634 | 6.5551  | C6H12O6                | C10906 | [M]+        | BioDeepDB | 1.4E-07 | pos | 2 | 10500898.5 |
| M244T387   | Fucose 1-phosphate        | 244.036613 | 386.78  | 244.0348 | 7.4285  | C6H13O8P               | C02985 | [M]-        | BioDeepDB | 0.7516  | neg | 1 | 921333.318 |
| M639T539_2 | Fucoxanthin               | 639.403236 | 538.619 | 658.4233 | 2.61839 | C42H58O6               | C08596 | [M-2H2O-H]- | MoNA      | 0.83183 | neg | 1 | 4661412.21 |
| M115T78    | Fumaric acid              | 115.001632 | 78.2661 | 116.011  | 7.37022 | C4H4O4                 | C00122 | [M-H]-      | BioDeepDB | 3.3E-16 | neg | 2 | 516626063  |
| M578T556_2 | Fumitremorgin A           | 578.287185 | 555.524 | 579.2945 | 0.01822 | 7                      | C20564 | [M-H]-      | MoNA      | 0.98441 | neg | 1 | 3602534.9  |
| M721T502_2 | Fumonisin B1              | 721.369199 | 501.549 | 721.3885 | 26.7566 | 5                      | C19241 | [M]+        | BioDeepDB | 1       | pos | 1 | 1597382.95 |
| M653T595_2 | Fungichromin              | 653.385427 | 595.066 | 670.3928 | 0.09268 | C35H58O12              | C13299 | [M+H-2H2O]+ | BioDeepDB | 0.98468 | pos | 1 | 26554803.9 |
| M208T60    | Furazolidone              | 208.02795  | 59.9075 | 225.0386 | 15.4617 | C8H7N3O5               | C07999 | [M+H-2H2O]+ | mzCloud   | 0.86131 | pos | 1 | 3127319.28 |
| M354T323   | Fusarenone X              | 354.138977 | 322.536 | 354.1315 | 21.1119 | C17H22O8               | C19583 | [M]+        | mzCloud   | 0.95179 | pos | 1 | 1113201.44 |
| M172T567   | Gabapentin                | 172.13258  | 567.1   | 171.1259 | 3.4602  | C9H17N02               | C07018 | [M+H]+      | mzCloud   | 0.61506 | pos | 1 | 4651877.1  |
| M191T826   | Galactaric acid           | 191.018423 | 826.333 | 210.0376 | 4.11833 | C6H10O8                | C00879 | [M-2H2O-H]- | BioDeepDB | 0.72576 | neg | 1 | 1704807.92 |



|          |                                          |            |         |          |         |                        |        |                                     |           |         |     |   |            |
|----------|------------------------------------------|------------|---------|----------|---------|------------------------|--------|-------------------------------------|-----------|---------|-----|---|------------|
| M163T34  | Galactitol                               | 163.059625 | 34.4117 | 182.079  | 6.04379 | C6H14O6                | C01697 | [M-H <sub>2</sub> O-H] <sup>-</sup> | BioDeepDB | 0.66298 | neg | 1 | 2095130.47 |
| M177T169 | Galactonic acid                          | 177.039798 | 168.507 | 196.0583 | 0.64539 | C6H12O7                | C00880 | [M-H <sub>2</sub> O-H] <sup>-</sup> | mzCloud   | 0.58329 | neg | 1 | 19250447.7 |
| M178T121 | Galactonolactone                         | 178.042468 | 120.945 | 178.0477 | 29.3861 | C6H10O6                | C03383 | [M] <sup>-</sup>                    | MetaDNA   | 0.00098 | neg | 2 | 9595763.77 |
| M261T91  | Galactose 1-phosphate                    | 261.034995 | 90.7088 | 260.0297 | 7.58808 | C6H13O9P               | C00103 | [M+H] <sup>+</sup>                  | MetaDNA   | 0.00174 | pos | 2 | 210063776  |
| M444T644 | Galactosylsphingosine                    | 444.336748 | 643.727 | 461.3353 | 19.9896 | C24H47N07              | C01747 | [M+H-H <sub>2</sub> O] <sup>+</sup> | BioDeepDB | 0.91447 | pos | 1 | 4193098.49 |
| M193T332 | Galacturonic acid                        | 193.03558  | 332.105 | 194.0427 | 0.80996 | C6H10O7                | C08348 | [M-H] <sup>-</sup>                  | mzCloud   | 0.6058  | neg | 1 | 14665347.5 |
| M288T197 | Galantamine                              | 288.165123 | 196.644 | 287.1521 | 18.4711 | C17H21N03              | C08526 | [M+H] <sup>+</sup>                  | OTCML     | 0.79074 | pos | 1 | 13643334.5 |
| M171T422 | Gallic acid                              | 171.02823  | 421.784 | 170.0215 | 3.19239 | C7H6O5                 | C01424 | [M+H] <sup>+</sup>                  | MoNA      | 0.00055 | pos | 2 | 9345702.06 |
| M385T369 | Gambufotalin                             | 385.23039  | 369.321 | 402.2406 | 7.26918 | C24H34O5               | C16962 | [M+H-H <sub>2</sub> O] <sup>+</sup> | OTCML     | 0.87582 | pos | 1 | 1279344.13 |
| M627T577 | Gambogic acid gamma <sup>-</sup>         | 627.297691 | 576.787 | 628.3036 | 2.15007 | C38H44O8               | C10062 | [M-H] <sup>-</sup>                  | MoNA      | 0.79776 | neg | 1 | 1010693.12 |
| M104T88  | Aminobutyric gamma-Glutamyl <sup>-</sup> | 104.107084 | 87.6739 | 103.0633 | 2.87907 | C4H9N02                | C00334 | [M+H] <sup>+</sup>                  | BioDeepDB | 8.3E-12 | pos | 2 | 2.1003E+10 |
| M198T240 | beta-gamma <sup>-</sup>                  | 198.087305 | 239.574 | 199.0957 | 5.64765 | C8H13N3O3<br>C7H11N2O5 | C06114 | [M-H] <sup>-</sup>                  | MetaDNA   | 0.00084 | neg | 2 | 6107787.68 |
| M219T156 | Glutamylalanine gamma <sup>-</sup>       | 219.096411 | 156.393 | NULL     | 4.97095 | R<br>C8H14N2O5         | C03740 | [M+H] <sup>+</sup>                  | BioDeepDB | 0.67389 | pos | 1 | 10950477.2 |
| M250T33  | Glutamylcysteine Gamma-Linolenic         | 250.143862 | 32.8715 | 250.0623 | 2.61963 | S                      | C00669 | [M] <sup>-</sup>                    | BioDeepDB | 0.60241 | neg | 1 | 254883.77  |
| M261T702 | acid                                     | 261.22005  | 702.055 | 278.2246 | 11.0408 | C18H30O2               | C06426 | [M+H-H <sub>2</sub> O] <sup>+</sup> | MoNA      | 0.79478 | pos | 1 | 7631032.86 |
| M137T826 | Gamma-terpinene                          | 137.132759 | 825.74  | 136.1252 | 1.88537 | C10H16                 | C09900 | [M+H] <sup>+</sup>                  | BioDeepDB | 1.5E-06 | pos | 2 | 12583073.3 |
| M416T663 | gamma-Tocopherol                         | 416.36142  | 663.287 | 416.3654 | 9.55985 | C28H48O2               | C02483 | [M] <sup>+</sup>                    | BioDeepDB | 0.99956 | pos | 1 | 37129740.3 |
| M410T591 | Gamma-Tocotrienol                        | 410.307774 | 590.607 | 410.3185 | 26.1414 | C28H42O2               | C14155 | [M] <sup>+</sup>                    | BioDeepDB | 0.96765 | pos | 1 | 7965053.24 |
| M404T712 | Gardenoside                              | 404.131533 | 711.794 | 404.1319 | 0.81329 | C17H24O11              | C09779 | [M] <sup>-</sup>                    | mzCloud   | 0.61994 | neg | 1 | 13863275.8 |

|          |                  | C19H22FN3  |         |          |         |           |        |            |           |         |     |   |            |
|----------|------------------|------------|---------|----------|---------|-----------|--------|------------|-----------|---------|-----|---|------------|
| M375T661 | Gatifloxacin     | 375.164312 | 661.453 | 375.1594 | 13.0937 | 04        | C07661 | [M]-       | GNPS      | 0.84815 | neg | 1 | 1845277.04 |
| M365T703 | Gein             | 365.209039 | 702.622 | 384.2301 | 7.31372 | C24H32O4  | C17058 | [M-H2O-H]- | MoNA      | 0.7551  | neg | 1 | 4552695.51 |
| M560T674 |                  |            |         |          |         | C29H40N2O |        |            |           |         |     |   |            |
| _1       | Geldanamycin     | 560.270795 | 674.402 | 560.2734 | 4.65021 | 9         | C11222 | [M]+       | BioDeepDB | 0.9959  | pos | 1 | 6364065.31 |
|          |                  |            |         |          |         | C9H11F2N3 |        |            |           |         |     |   |            |
| M263T164 | Gemcitabine      | 263.071549 | 163.846 | 263.0718 | 0.95499 | 04        | C07650 | [M]+       | MoNA      | 0.98758 | pos | 1 | 22015685.4 |
| M249T779 | Gemfibrozil      | 249.148758 | 779.407 | 250.1569 | 3.38131 | C15H22O3  | C07020 | [M-H]-     | BioDeepDB | 0.65185 | neg | 1 | 1295803.45 |
| M225T472 | Genipin          | 225.079046 | 471.768 | 226.0841 | 9.87146 | C11H14O5  | C09780 | [M-H]-     | mzCloud   | 0.72932 | neg | 1 | 456037.473 |
| M531T161 | Genipin 1-       |            |         |          |         |           |        |            |           |         |     |   |            |
| _3       | gentiobioside    | 531.168455 | 161.184 | 550.1898 | 5.50606 | C23H34O15 | C16965 | [M-H2O-H]- | OTCML     | 0.76758 | neg | 1 | 10303076.9 |
| M369T92  | Geniposide       | 369.12003  | 91.9113 | 388.1369 | 4.11799 | C17H24O10 | C09781 | [M-H2O-H]- | mzCloud   | 0.79621 | neg | 1 | 15106290.8 |
| M355T408 | Geniposidic acid | 355.102547 | 408.368 | 374.1213 | 1.02122 | C16H22O10 | C11673 | [M-H2O-H]- | mzCloud   | 0.61014 | neg | 1 | 1869018.26 |
| M270T686 | Genistein        | 270.048322 | 686.047 | 270.0528 | 0.09744 | C15H10O5  | C06563 | [M]-       | BioDeepDB | 0.57601 | neg | 1 | 380565.627 |
| M433T598 |                  |            |         |          |         |           |        |            |           |         |     |   |            |
| _2       | Genistin         | 433.345656 | 598.125 | 432.1056 | 1.44057 | C21H20O10 | C09126 | [M+H]+     | BioDeepDB | 0.61598 | pos | 1 | 600471015  |
|          |                  |            |         |          |         | C18H36N4O |        |            |           |         |     |   |            |
| M467T308 | Gentamicin A     | 467.245341 | 307.616 | 468.2431 | 20.3683 | 10        | C01917 | [M-H]-     | MetaDNA   | 0.08142 | neg | 2 | 4558950.98 |
| M337T193 | Gentiopicroside  | 337.093945 | 192.769 | 356.1107 | 4.75393 | C16H20O9  | C09782 | [M-H2O-H]- | OTCML     | 0.75311 | neg | 1 | 1417716.47 |
|          | Gentisate        |            |         |          |         |           |        |            |           |         |     |   |            |
| M121T820 | aldehyde         | 121.023415 | 819.78  | 138.0317 | 7.03198 | C7H6O3    | C05585 | [M+H-H2O]+ | BioDeepDB | 0.6574  | pos | 1 | 7193051.59 |
| M153T235 | Gentisic acid    | 153.016785 | 234.972 | 154.0266 | 7.02078 | C7H6O4    | C00628 | [M-H]-     | BioDeepDB | 3.3E-15 | neg | 2 | 20828730   |
| M153T418 |                  |            |         |          |         |           |        |            |           |         |     |   |            |
| _2       | Geranial         | 153.127253 | 417.676 | 152.1201 | 0.80071 | C10H16O   | C01499 | [M+H]+     | mzCloud   | 0.58887 | pos | 1 | 56040239.3 |
| M169T336 | Geranic acid     | 169.121848 | 336.344 | 168.115  | 2.53006 | C10H16O2  | C16461 | [M+H]+     | MoNA      | 0.68147 | pos | 1 | 6645590.88 |
| M179T562 | Geranyl acetate  | 179.142466 | 561.955 | 196.1463 | 20.0955 | C12H20O2  | C09861 | [M+H-H2O]+ | BioDeepDB | 0.98183 | pos | 1 | 84989082.5 |
| M330T579 | Geranylacetone   | 330.29763  | 578.816 | 330.2923 | 16.1377 | C23H38O   | C13297 | [M]+       | BioDeepDB | 0.97434 | pos | 1 | 3965678.97 |

|          | Geranylgeranyl-  |            |         |          |         | C20H3607P |        |                  |           |         |     |   |            |
|----------|------------------|------------|---------|----------|---------|-----------|--------|------------------|-----------|---------|-----|---|------------|
| M450T481 | PP               | 450.195884 | 481.089 | 450.1936 | 5.07353 | 2         | C00353 | [M]-             | BioDeepDB | 0.82529 | neg | 1 | 780443.2   |
| M345T790 | Gibberellin A124 | 345.167689 | 790.161 | 346.178  | 8.79284 | C20H2605  | C11861 | [M-H]-           | MoNA      | 0.69847 | neg | 1 | 3310737.9  |
| M346T445 | Gibberellin A3   | 346.163894 | 444.725 | 346.1416 | 4.24691 | C19H2206  | C01699 | [M-<br>H2O+NH4]+ | BioDeepDB | 0.63804 | pos | 1 | 1071154.66 |
| M330T526 | Gibberellin A5   | 330.145436 | 526.124 | 330.1467 | 3.82978 | C19H2205  | C11871 | [M]-             | MoNA      | 0.99458 | neg | 1 | 665219.757 |
| M348T807 | Gibberellin A53  | 348.201246 | 806.698 | 348.1937 | 21.67   | C20H2805  | C06094 | [M]-             | MoNA      | 0.80109 | neg | 1 | 2036063.88 |
| M311T703 | Gibberellin A7   | 311.127185 | 702.622 | 330.1467 | 3.61437 | C19H2205  | C11867 | [M-H2O-H]-       | mzCloud   | 0.68259 | neg | 1 | 680602.023 |
| M293T778 | Gingerol         | 293.173535 | 777.92  | 294.1831 | 7.80837 | C17H2604  | C10462 | [M-H]-           | MoNA      | 3E-07   | neg | 2 | 64841429   |
| M547T251 | Ginkgetin        | 547.114274 | 251.004 | 566.1213 | 20.7708 | C32H22010 | C10048 | [M-H2O-H]-       | BioDeepDB | 1       | neg | 1 | 706181.405 |
| M440T777 | Ginkgolide C     | 440.134205 | 777.245 | 440.1319 | 5.23653 | C20H24011 | C07603 | [M]+             | BioDeepDB | 0.67254 | pos | 1 | 2499612.31 |
| M799T563 | Ginsenoside A2   | 799.464214 | 562.946 | 800.4922 | 25.9051 | C42H72014 | C08946 | [M-H]-           | MoNA      | 0.00075 | neg | 2 | 3550110.75 |
| M621T605 | Ginsenoside F1   | 621.427758 | 605.264 | 638.4394 | 6.77214 | C36H6209  | C20780 | [M+H2O]+         | MetaDNA   | 0.02369 | pos | 2 | 15125866.1 |
| M784T562 | Ginsenoside F2   | 784.493524 | 561.955 | 784.4973 | 4.81315 | C42H72013 | C20779 | [M]+             | MetaDNA   | 0.01118 | pos | 2 | 32047454.6 |
| M930T703 | Ginsenoside Rd   | 929.526103 | 703.35  | 946.5501 | 17.8193 | C48H82018 | C20725 | [M+H2O]+         | mzCloud   | 0.00034 | pos | 2 | 14626071   |
| M946T559 | Ginsenoside Re   | 945.530864 | 558.574 | 946.5501 | 12.6657 | C48H82018 | C08944 | [M-H]-           | OTCML     | 2.6E-06 | neg | 2 | 11009394.8 |
| M785T703 | Ginsenoside Rg3  | 784.506951 | 703.35  | 784.4973 | 12.3015 | C42H72013 | C20778 | [M]+             | mzCloud   | 2.5E-06 | pos | 2 | 11651125.7 |
| M939T665 | Ginsenoside Ro   | 939.475674 | 664.745 | 956.4981 | 15.958  | C48H76019 | C17543 | [M+H2O]+         | MoNA      | 0.8707  | pos | 1 | 2241187.55 |
| M323T747 | Glabranin        | 323.12707  | 747.194 | 324.1362 | 5.61042 | C20H2004  | C09752 | [M-H]-           | MoNA      | 0.70032 | neg | 1 | 302267.747 |
| M497T798 | Glaucarubin      | 497.235438 | 797.773 | 496.2308 | 5.30452 | C25H36010 | C08760 | [M+H]+           | BioDeepDB | 0.65723 | pos | 1 | 35214317.2 |
| M491T776 | Glimepiride      | 491.232737 | 776.194 | 490.225  | 0.93867 | C24H34N4O | 5S     | [M+H]+           | MoNA      | 0.62963 | pos | 1 | 9758773.3  |

|                    |                                 | C21H27N5O  |         |          |         |                        |        |            |           |         |     |   |            |
|--------------------|---------------------------------|------------|---------|----------|---------|------------------------|--------|------------|-----------|---------|-----|---|------------|
| M426T362           | Glipizide                       | 426.164464 | 362.384 | 445.1784 | 10.5088 | 4S                     | C07021 | [M-H2O-H]- | MoNA      | 0.99975 | neg | 1 | 3574363.87 |
| M191T387           | Glucaric acid                   | 191.018556 | 386.78  | 210.0376 | 3.42405 | C6H1008<br>C11H21N01   | C00818 | [M-H2O-H]- | GNPS      | 0.63916 | neg | 1 | 6728254.68 |
| M404T359           | Glucoiberin                     | 404.023756 | 359.297 | 423.0328 | 23.1323 | OS3<br>C15H21N09       | C08411 | [M-H2O-H]- | MoNA      | 0.90714 | neg | 1 | 886991.213 |
| M422T428           | gluconasturtiin                 | 422.069547 | 428.448 | 423.461  | 26.1795 | S2                     | C08417 | [M-H]-     | MoNA      | 1       | neg | 1 | 2791728.96 |
| M195T84            | Gluconic acid                   | 195.047251 | 83.9405 | 196.0583 | 19.3428 | C6H1207                | C00257 | [M-H]-     | MoNA      | 0.00912 | neg | 2 | 779626783  |
| M177T121           | Gluconolactone                  | 177.040312 | 120.945 | 178.0477 | 0.63524 | C6H1006                | C00198 | [M-H]-     | BioDeepDB | 0.00019 | neg | 2 | 152136466  |
| M180T317           | Glucosamine<br>Glucosamine 6-   | 180.08743  | 317.199 | 179.0794 | 4.18879 | C6H13N05               | C00329 | [M+H]+     | MoNA      | 1.3E-07 | pos | 2 | 8028773.42 |
| M259T220           | phosphate<br>Glucose 6-         | 259.045256 | 219.979 | 259.0457 | 1.71255 | C6H14N08P              | C00352 | [M]-       | BioDeepDB | 0.69045 | neg | 1 | 2044513.5  |
| M261T117           | phosphate                       | 261.035465 | 116.689 | 260.0297 | 5.85848 | C6H1309P<br>C14H19N09  | C00092 | [M+H]+     | mzCloud   | 0.64902 | pos | 1 | 29364866.6 |
| M390T241           | Glucotropaeolin                 | 390.029427 | 240.733 | 409.0501 | 5.85267 | S2                     | C02153 | [M-H2O-H]- | BioDeepDB | 0.85112 | neg | 1 | 560528.962 |
| M147T181           | Glutamine<br>Glutamylglutamic   | 147.075826 | 181.154 | 146.0691 | 3.74282 | C5H10N203<br>C10H16N20 | C00303 | [M+H]+     | mzCloud   | 0.67767 | pos | 1 | 17621602.8 |
| M257T798           | acid                            | 257.071876 | 797.757 | 276.0958 | 21.5271 | 7                      | C01425 | [M-H2O-H]- | MoNA      | 0.80731 | neg | 1 | 1282569.74 |
| M131T93            | Glutaric acid                   | 131.033    | 92.9618 | 132.0423 | 15.2643 | C5H804<br>C10H17N30    | C00489 | [M-H]-     | BioDeepDB | 2.4E-05 | neg | 2 | 312097618  |
| M307T334           | Glutathione<br>Glutathionylsper | 307.077286 | 333.655 | 307.0838 | 21.2113 | 6S<br>C20H41N7O        | C00051 | [M]-       | MetaDNA   | 0.08016 | neg | 2 | 1362643.67 |
| M491T564           | mine                            | 491.283428 | 564.487 | 491.289  | 11.341  | 5S                     | C16562 | [M]-       | MetaDNA   | 0.01325 | neg | 2 | 6834273.59 |
| M217T565           | Glutethimide                    | 217.106239 | 564.534 | 217.1103 | 18.6063 | C13H15N02<br>C23H28C1N | C07489 | [M]+       | mzCloud   | 0.92584 | pos | 1 | 31350594.9 |
| M492T723           | Glyburide                       | 492.147273 | 722.604 | 493.1438 | 21.8005 | 305S                   | C07022 | [M-H]-     | GNPS      | 0.869   | neg | 1 | 229346.011 |
| M91T94<br>M105T84_ | Glyceraldehyde                  | 91.0385801 | 93.7378 | 90.0317  | 4.3491  | C3H603                 | C02154 | [M+H]+     | BioDeepDB | 0.61741 | pos | 1 | 15234428.8 |
| 2                  | Glyceric acid                   | 105.017217 | 83.9405 | 106.0266 | 8.81239 | C3H604                 | C00258 | [M-H]-     | BioDeepDB | 8.2E-09 | neg | 2 | 894430144  |

|          |                        |            |         |          |         |                        |        |                        |           |         |     |   |            |
|----------|------------------------|------------|---------|----------|---------|------------------------|--------|------------------------|-----------|---------|-----|---|------------|
| M93T98   | Glycerol               | 93.0545142 | 97.7824 | 92.0473  | 0.6644  | C3H8O3                 | C00116 | [M+H] <sup>+</sup>     | BioDeepDB | 3.6E-05 | pos | 2 | 20628822.3 |
| M172T332 | Glycerol 3-phosphate   | 172.014666 | 332.2   | 172.0137 | 5.61531 | C3H9O6P                | C00093 | [M] <sup>+</sup>       | MoNA      | 0.77674 | pos | 1 | 2003117.29 |
| M258T90  | Glycerophosphocholine  | 258.111485 | 89.6999 | 258.1106 | 3.42949 | C8H21NO6P              | C00670 | [M] <sup>+</sup>       | MetaDNA   | 0.0023  | pos | 2 | 1958065370 |
| M284T713 | Glycitein              | 284.064218 | 713.292 | 284.0685 | 14.9815 | C16H12O5               | C14536 | [M] <sup>-</sup>       | mzCloud   | 0.78515 | neg | 1 | 782157.721 |
| M445T415 | Glycitin               | 445.109586 | 414.571 | 446.1213 | 8.7925  | C22H22O10              | C16195 | Unknown                | OTCML     | 0.72371 | neg | 1 | 587069.601 |
| M465T796 | Glycocholic acid       | 465.321547 | 796.202 | 465.309  | 26.9638 | C26H43NO6              | C01921 | [M] <sup>-</sup>       | BioDeepDB | 0.81417 | neg | 1 | 228811.094 |
| M133T99  | Glycyl-glycine         | 133.060108 | 98.9918 | 132.0535 | 4.96188 | C4H8N2O3               | C02037 | [M+H] <sup>+</sup>     | MoNA      | 0.63046 | pos | 1 | 108686450  |
| M187T227 | Glycylleucine          | 187.10771  | 227.421 | 188.1161 | 5.91114 | C8H16N2O3              | C02155 | [M-H] <sup>-</sup>     | MoNA      | 1.9E-07 | neg | 2 | 4783926.04 |
| M471T713 | Glycyrretinate         | 471.344737 | 713.464 | 470.3396 | 4.53872 | C30H46O4<br>C10H14N5O  | C02283 | [M+H] <sup>+</sup>     | mzCloud   | 0.67822 | pos | 1 | 13075604.5 |
| M362T238 | GMP                    | 362.048513 | 238.024 | 363.058  | 6.03987 | 8P                     | C00144 | [M-H] <sup>-</sup>     | BioDeepDB | 1.1E-09 | neg | 2 | 3220102.73 |
| M175T341 | Gramine                | 175.119536 | 340.548 | 174.1157 | 19.6332 | C11H14N2               | C08304 | [M+H] <sup>+</sup>     | OTCML     | 0.82997 | pos | 1 | 13890243.2 |
| M313T509 | Granisetron            | 313.201485 | 508.883 | 312.195  | 2.52545 | C18H24N4O              | C07023 | [M+H] <sup>+</sup>     | mzCloud   | 0.60802 | pos | 1 | 5086673.91 |
| M393T703 | Grayanotoxin I         | 393.230805 | 702.622 | 412.2461 | 7.87158 | C22H36O7<br>C17H17C1O  | C09103 | [M-H2O-H] <sup>-</sup> | BioDeepDB | 0.99892 | neg | 1 | 3914097.06 |
| M352T237 | Griseofulvin           | 352.072044 | 237.171 | 352.0714 | 1.82842 | 6                      | C06686 | [M] <sup>+</sup>       | mzCloud   | 0.68676 | pos | 1 | 8719656.85 |
| M231T241 | Guanabenz              | 231.017716 | 241.368 | 230.0126 | 9.34928 | C8H8C12N4<br>C9H9C12N3 | C07034 | [M+H] <sup>+</sup>     | BioDeepDB | 0.67633 | pos | 1 | 3362549.67 |
| M245T331 | Guanfacine             | 245.005358 | 330.809 | 245.0123 | 28.3321 | 0                      | C07037 | [M] <sup>+</sup>       | BioDeepDB | 0.89517 | pos | 1 | 3923763.39 |
| M175T118 | Guanidinosuccinic acid | 174.954609 | 117.954 | 175.0593 | 1.02333 | C5H9N3O4               | C03139 | [M] <sup>-</sup>       | BioDeepDB | 4.1E-23 | neg | 2 | 1517931368 |
| M117T834 | Guanidoacetic acid     | 117.053755 | 833.866 | 117.0538 | 0.38765 | C3H7N3O2               | C00581 | [M] <sup>-</sup>       | BioDeepDB | 8.5E-30 | neg | 2 | 3188987.19 |
| M152T106 | Guanine                | 152.056359 | 105.503 | 151.0494 | 2.08637 | C5H5N5O                | C00242 | [M+H] <sup>+</sup>     | MoNA      | 9E-10   | pos | 2 | 104339193  |

|           |                                    |            |         |          |         |           |           |        |            |           |         |     |   |            |
|-----------|------------------------------------|------------|---------|----------|---------|-----------|-----------|--------|------------|-----------|---------|-----|---|------------|
| M282T309  | Guanosine                          | 282.080187 | 309.091 | 283.0917 | 13.8953 | 5         | C10H13N5O | C00387 | [M-H]-     | BioDeepDB | 1.9E-09 | neg | 2 | 115019628  |
| M344T206  | Guanosine 2,3-<br>cyclic phosphate | 344.037655 | 206.399 | 345.0474 | 7.17619 | 7P        | C10H12N5O | C06194 | [M-H]-     | MetaDNA   | 0.007   | neg | 2 | 16617315.4 |
| M588T163  | Guanosine<br>diphosphate           | 588.055828 | 162.728 | 605.0772 | 23.702  | 16P2      | C16H25N5O | C00096 | [M+H-H2O]+ | MoNA      | 0.83814 | pos | 1 | 2711393.27 |
| M523T743  | Guanosine-5'-<br>triphosphate      | 523.265546 | 742.68  | 522.991  | 1.66761 | 14P3      | C10H16N5O | C00044 | [M]+       | BioDeepDB | 0.69425 | pos | 1 | 12367299.5 |
| M177T349  | Gulonic acid                       | 177.039789 | 348.668 | 196.0583 | 0.68487 | C6H12O7   | C6H12O7   | C00800 | [M-H2O-H]- | GNPS      | 3.8E-06 | neg | 2 | 10941615.1 |
| M142T374  | Guvacoline                         | 142.086346 | 373.532 | 141.079  | 0.49164 | C7H11NO2  | C7H11NO2  | C16821 | [M+H]+     | mzCloud   | 0.59496 | pos | 1 | 25481440.2 |
| M259T211  |                                    |            |         |          |         |           | C13H9C1N2 |        |            |           |         |     |   |            |
| _2        | GW 9662                            | 259.027982 | 211.288 | 276.0302 | 20.1373 | 03        |           | C15627 | [M+H-H2O]+ | BioDeepDB | 1       | pos | 1 | 7854501.02 |
| M784T563  | Gypenoside LXXV                    | 784.477908 | 563.297 | 784.4973 | 24.7196 | C42H72O13 | C42H72O13 | C20777 | [M]+       | MetaDNA   | 0.02831 | pos | 2 | 21147574.4 |
| M101T32_3 | Gyromitrin                         | 101.070839 | 32.4171 | 100.0637 | 0.98537 | C4H8N2O   | C4H8N2O   | C08305 | [M+H]+     | MoNA      | 0.72863 | pos | 1 | 6034727.63 |
| M302T331  | Haematoxylin                       | 302.085617 | 330.552 | 302.079  | 21.777  | C16H14O6  | C16H14O6  | C09931 | [M]-       | mzCloud   | 0.82171 | neg | 1 | 1377555.38 |
| M329T766  | Halofenozide                       | 329.106732 | 765.588 | 330.1135 | 1.52623 | 202       | C18H19C1N | C18791 | [M-H]-     | MoNA      | 0.98929 | neg | 1 | 1099949.98 |
| M375T584  | Haloperidol                        | 375.143709 | 584.417 | 375.1401 | 9.52781 | N02       | C21H23C1F | C01814 | [M]+       | mzCloud   | 0.85793 | pos | 1 | 6905021.44 |
| M360T83   | Haloxyfop                          | 360.029966 | 82.8986 | 361.0329 | 12.0595 | 3N04      | C15H11C1F | C04871 | [M-H]-     | MoNA      | 0.99991 | neg | 1 | 21621664.6 |
| M215T429  | Harmaline                          | 215.11719  | 428.735 | 214.1106 | 3.18774 | C13H14N2O | C13H14N2O | C06536 | [M+H]+     | MoNA      | 3.4E-05 | pos | 2 | 22449519   |
| M201T413  | Harmalol                           | 201.101736 | 413.295 | 200.095  | 2.50368 | C12H12N2O | C12H12N2O | C06537 | [M+H]+     | MoNA      | 4E-05   | pos | 2 | 79924732.7 |
| M183T487  | Harman                             | 183.091268 | 486.885 | 182.0844 | 2.22129 | C12H10N2  | C12H10N2  | C09209 | [M+H]+     | MoNA      | 3.7E-06 | pos | 2 | 41849578.7 |
| M213T436  | Harmine                            | 213.101926 | 436.069 | 212.095  | 1.64325 | C13H12N2O | C13H12N2O | C06538 | [M+H]+     | mzCloud   | 0.80787 | pos | 1 | 5056990.93 |
| M494T376  | Harpagoside                        | 494.180607 | 376.15  | 494.1788 | 3.63318 | C24H30O11 | C24H30O11 | C09783 | [M]-       | mzCloud   | 0.74092 | neg | 1 | 1476541.82 |
| M531T780  |                                    |            |         |          |         |           |           |        | [M]-       |           |         |     |   |            |
| _2        | Harringtonin                       | 531.262702 | 780.043 | 531.2468 | 9.32497 | C28H37N09 | C28H37N09 | C10597 | H2O+NH4]+  | OTCML     | 0.87239 | pos | 1 | 11667209.1 |

|          |                                             | C21H32N4O  |         |          |         |           |        |            |           |         |     |   |            |
|----------|---------------------------------------------|------------|---------|----------|---------|-----------|--------|------------|-----------|---------|-----|---|------------|
| M417T483 | HC-toxin<br>Hederagenin 3-O-<br>arabinoside | 417.212668 | 482.656 | 436.2322 | 2.7372  | 6         | C15676 | [M-H2O-H]- | BioDeepDB | 0.99238 | neg | 1 | 1573445.35 |
| M605T458 |                                             | 605.410588 | 457.576 | 604.3975 | 9.60071 | C35H56O8  | C08953 | [M+H]+     | MetaDNA   | 0.03474 | pos | 2 | 3902377.8  |
| M724T831 | Hellebrin                                   | 724.3376   | 830.813 | 724.3306 | 9.66375 | C36H52O15 | C08868 | [M]-       | GNPS      | 0.99958 | neg | 1 | 514905.384 |
| M130T272 | Heptanoic acid                              | 130.096265 | 272.304 | 130.0994 | 24.095  | C7H14O2   | C17714 | [M]+       | BioDeepDB | 0.25718 | pos | 2 | 28486585.3 |
| M249T258 | Heptenophos                                 | 249.011924 | 258.208 | 250.0162 | 12.0485 | P         | C18660 | [M-H]-     | MoNA      | 0.71624 | neg | 1 | 102568.443 |
| M301T678 | Herbacetin                                  | 301.032726 | 678.416 | 302.0427 | 5.8938  | C15H10O7  | C02806 | Unknown    | OTCML     | 0.84085 | neg | 1 | 4560992.57 |
| M177T699 | Herniarin                                   | 177.054034 | 699.389 | 176.0473 | 3.0585  | C10H8O3   | C09268 | [M+H]+     | BioDeepDB | 0.7112  | pos | 1 | 9425469.03 |
| M301T537 | Hesperetin                                  | 301.070502 | 537.051 | 302.079  | 4.05794 | C16H14O6  | C01709 | [M-H]-     | MoNA      | 0.00049 | neg | 2 | 2649874.12 |
| M610T341 | Hesperidin                                  | 610.195488 | 341.266 | 610.1898 | 9.32239 | C28H34O15 | C09755 | [M]-       | mzCloud   | 0.82984 | neg | 1 | 1100986.26 |
| M389T475 | Hetacillin                                  | 389.143402 | 474.888 | 389.1409 | 6.43013 | 4S        | C11729 | [M]-       | BioDeepDB | 0.91498 | neg | 1 | 1569392.35 |
| M314T205 | Hexaconazole                                | 314.080083 | 204.747 | 313.0749 | 6.66529 | N30       | C18466 | [M+H]+     | mzCloud   | 0.66476 | pos | 1 | 4430041.78 |
| M285T779 | Hexadecanedioate                            | 285.205698 | 779.407 | 286.2144 | 4.99828 | C16H30O4  | C19615 | [M-H]-     | mzCloud   | 7.6E-07 | neg | 2 | 2946499.66 |
| M102T438 | Hexylamine                                  | 102.127575 | 437.571 | 101.1204 | 0.98837 | C6H15N    | C08306 | [M+H]+     | MoNA      | 0.74405 | pos | 1 | 11637093.1 |
| M272T395 | Higenamine                                  | 272.126198 | 395.264 | 271.1208 | 6.9911  | C16H17NO3 | C06346 | [M+H]+     | OTCML     | 0.0467  | pos | 2 | 72641228.8 |
| M328T756 | Himbacine                                   | 328.262437 | 755.537 | 345.2668 | 9.35597 | C22H35NO2 | C10598 | [M+H-H2O]+ | BioDeepDB | 0.9995  | pos | 1 | 1658649.19 |
| M180T278 | Hippuric acid                               | 180.065255 | 277.699 | 179.0582 | 1.22867 | C9H9NO3   | C01586 | [M+H]+     | BioDeepDB | 4.4E-07 | pos | 2 | 57190342.7 |
| M369T703 |                                             |            |         |          |         | C22H28N2O |        |            |           |         |     |   |            |
| _1       | Hirsutine                                   | 369.223133 | 703.35  | 368.21   | 15.7985 | 3         | C16972 | [M+H]+     | OTCML     | 0.94089 | pos | 1 | 30642785.9 |
| M299T173 | Hispidulin                                  | 299.052921 | 173.092 | 300.0634 | 8.62313 | C16H12O6  | C10058 | Unknown    | OTCML     | 0.99926 | neg | 1 | 732356.137 |
| M112T246 | Histamine                                   | 112.086758 | 246.372 | 111.0796 | 1.05002 | C5H9N3    | C00388 | [M+H]+     | MoNA      | 0.59937 | pos | 1 | 1198737293 |

|                        |                                        |                          |                  |                      |                    |                        |                  |                               |                    |                    |            |        |                          |
|------------------------|----------------------------------------|--------------------------|------------------|----------------------|--------------------|------------------------|------------------|-------------------------------|--------------------|--------------------|------------|--------|--------------------------|
| M188T103_2             | Homo-L-arginine                        | 188.127378               | 103.423          | 188.1273             | 0.41265            | C7H16N4O2<br>C10H16N4O | C01924           | [M] <sup>+</sup>              | BioDeepDB          | 0.58135            | pos        | 1      | 14833281.1               |
| M239T235               | Homocarnosine                          | 239.113708               | 234.972          | 240.1222             | 5.08747            | 3                      | C00884           | [M-H] <sup>-</sup>            | MoNA               | 0.6298             | neg        | 1      | 5843261.38               |
| M190T100               | Homocitrulline                         | 190.118009               | 100.146          | 189.1113             | 2.98149            | C7H15N3O3              | C02427           | [M+H] <sup>+</sup>            | MoNA               | 0.69729            | pos        | 1      | 25253776.7               |
| M167T369               | Homogentisate                          | 167.032669               | 368.559          | 168.0423             | 14.0967            | C8H8O4                 | C00544           | [M-H] <sup>-</sup>            | mzCloud            | 1.2E-10            | neg        | 2      | 16303945.6               |
| M461T387<br>M183T594_1 | Homoplantagin<br>Homovanillic<br>acid  | 461.103432<br>183.064773 | 386.78<br>593.62 | 462.1162<br>182.0579 | 11.4242<br>2.19979 | C22H22O11<br>C9H10O4   | C17762<br>C05582 | Unknown<br>[M+H] <sup>+</sup> | OTCML<br>BioDeepDB | 0.89852<br>1.1E-05 | neg<br>pos | 1<br>2 | 935605.883<br>6034461.47 |
| M249T316               | Honokiol                               | 249.1219                 | 315.701          | 266.1307             | 5.40142            | C18H18O2               | C10630           | [M+H-2H] <sup>+</sup>         | OTCML              | 0.99689            | pos        | 1      | 13264087.6               |
| M166T365               | Hordenine                              | 166.122326               | 365.061          | 165.1154             | 2.10558            | C10H15NO               | C06199           | [M+H] <sup>+</sup>            | mzCloud            | 0.62823            | pos        | 1      | 4034942.59               |
| M405T628               | HT-2 Toxin<br>Hydantoin-5-             | 405.191313               | 627.731          | 424.2097             | 0.00752            | C22H32O8               | C19952           | [M-2H-H] <sup>-</sup>         | GNPS               | 0.98437            | neg        | 1      | 22742775.4               |
| M153T142               | propionic acid                         | 153.029137               | 141.655          | 172.0484             | 5.7079             | C6H8N2O4               | C05565           | [M-2H-H] <sup>-</sup>         | BioDeepDB          | 0.69322            | neg        | 1      | 1512085.31               |
| M160T362               | Hydralazine                            | 160.074237               | 362.146          | 160.0749             | 4.14401            | C8H8N4<br>C25H24F6N    | C07040           | [M] <sup>+</sup>              | BioDeepDB          | 0.02909            | pos        | 2      | 42325050.6               |
| M495T656               | Hydramethylnon<br>Hydrocortisone       | 495.194919               | 655.9            | 494.1905             | 5.7695             | 4                      | C10994           | [M+H] <sup>+</sup>            | BioDeepDB          | 0.9973             | pos        | 1      | 1408089.26               |
| M443T600               | succinate<br>Hydroflumethiazide        | 443.209441               | 599.904          | 462.2254             | 5.48399            | C25H34O8<br>C8H8F3N3O  | C12888           | [M-2H-H] <sup>-</sup>         | BioDeepDB          | 0.99698            | neg        | 1      | 1812472.22               |
| M331T85                | de<br>Hydrogen                         | 330.983699               | 85.0169          | 330.9908             | 21.4545            | 4S2                    | C07763           | [M] <sup>-</sup>              | BioDeepDB          | 0.88327            | neg        | 1      | 1161782.62               |
| M97T136                | phosphate                              | 96.9680404               | 135.795          | 97.9769              | 16.2821            | H3PO4                  | C00009           | [M-H] <sup>-</sup>            | MoNA               | 2.4E-05            | neg        | 2      | 40036017.5               |
| M110T600               | Hydroquinone<br>Hydroxyanthraquinone   | 110.019232               | 599.621          | 110.0368             | 8.37096            | C6H6O2                 | C00530           | [M] <sup>+</sup>              | BioDeepDB          | 2.4E-12            | pos        | 2      | 677219314                |
| M224T106               | none                                   | 224.048043               | 105.537          | 224.0473             | 3.11838            | C14H8O3                | C02980           | [M] <sup>-</sup>              | MoNA               | 0.9932             | neg        | 1      | 13101775.1               |
| M148T101_2             | Hydroxyisoleucine<br>Hydroxykynurenine | 148.096329               | 101.161          | 147.0895             | 3.18339            | C6H13NO3<br>C10H12N2O  | C20802           | [M+H] <sup>+</sup>            | OTCML              | 0.64708            | pos        | 1      | 42701857.1               |
| M224T32                | e                                      | 223.987425               | 32.4171          | 224.0797             | 4.42709            | 4                      | C02794           | [M] <sup>+</sup>              | BioDeepDB          | 0.05537            | pos        | 2      | 86772186.8               |



|            |                          |            |         |          |         |           |        |         |           |         |     |   |            |
|------------|--------------------------|------------|---------|----------|---------|-----------|--------|---------|-----------|---------|-----|---|------------|
| M181T508   | Hydroxyphenyllactic acid | 181.049329 | 507.55  | 182.0579 | 7.02079 | C9H10O4   | C03672 | [M-H]-  | BioDeepDB | 0.66993 | neg | 1 | 1625530.02 |
| M130T103   | Hydroxyproline           | 130.049438 | 102.948 | 131.0582 | 11.2391 | C5H9NO3   | C01157 | Unknown | OTCML     | 0.09843 | neg | 2 | 24169783.7 |
| M103T187   | Hydroxypyruvic acid      | 103.002433 | 186.689 | 104.011  | 12.3036 | C3H4O4    | C00168 | [M-H]-  | BioDeepDB | 5.4E-09 | neg | 2 | 1187039.61 |
| M374T673   | Hydroxyzine              | 374.172714 | 672.956 | 374.1761 | 9.04906 | C21H27ClN | C07045 | [M]+    | mzCloud   | 0.66972 | pos | 1 | 2181517.91 |
| M528T656   | Hygromycin B             | 528.235917 | 655.9   | 527.2326 | 7.49453 | C20H37N3O | C01925 | [M+H]+  | BioDeepDB | 0.75577 | pos | 1 | 3881195.17 |
| M536T776   | Hyperforin               | 536.379215 | 776.194 | 536.3866 | 13.7677 | C35H52O4  | C07608 | [M]+    | BioDeepDB | 0.75913 | pos | 1 | 5241344.62 |
| M109T69    | Hypotaaurine             | 109.021706 | 69.2834 | 109.0197 | 18.3985 | C2H7NO2S  | C00519 | [M]+    | MoNA      | 0.76337 | pos | 1 | 3629102.58 |
| M137T302   | Hypoxanthine             | 137.046416 | 302.191 | 136.0385 | 0.21468 | C5H4N4O   | C00262 | [M+H]+  | BioDeepDB | 2.7E-08 | pos | 2 | 47231354.6 |
| M310T716   | Ibogaine                 | 310.207172 | 716.403 | 310.2045 | 8.61469 | C20H26N2O | C09214 | [M]+    | GNPS      | 0.99926 | pos | 1 | 3640918.31 |
| M207T765   | Ibuprofen                | 207.137335 | 765.406 | 206.1307 | 2.99599 | C13H18O2  | C01588 | [M+H]+  | MoNA      | 0.65866 | pos | 1 | 11744276.2 |
| M677T477   | Icariin                  | 677.233761 | 476.554 | 676.2367 | 15.0836 | C33H40O15 | C17555 | [M+H]+  | mzCloud   | 0.7198  | pos | 1 | 729488.809 |
| M308T92_2  | Icosadienoic acid        | 308.27714  | 91.9113 | 308.2715 | 18.1969 | C20H36O2  | C16525 | [M]-    | mzCloud   | 1       | neg | 1 | 13220382.3 |
| M288T784   | Imazamethabenz-          | 288.151733 | 783.78  | 288.1474 | 15.0374 | C16H20N2O | C11494 | [M]+    | MoNA      | 0.76463 | pos | 1 | 2730318.45 |
| M306T438_2 | methyl Imazamox          | 306.146521 | 437.571 | 305.1376 | 5.37347 | C15H19N3O | C18598 | [M+H]+  | mzCloud   | 0.88484 | pos | 1 | 2718650.37 |
| M254T182   | Imidacloprid             | 254.045502 | 182.156 | 255.0523 | 1.88334 | C9H10ClN5 | C11110 | [M-H]-  | BioDeepDB | 0.6231  | neg | 1 | 1151772.48 |
| M157T97    | Imidazolelactic acid     | 157.060315 | 96.7698 | 156.0535 | 2.88818 | C6H8N2O3  | C05132 | [M+H]+  | mzCloud   | 0.60465 | pos | 1 | 6238427.78 |
| M172T157   | Iminoarginine            | 172.096525 | 156.582 | 172.096  | 3.05132 | C6H12N4O2 | C21026 | [M]-    | MetaDNA   | 0.04696 | neg | 2 | 6836060.41 |
| M134T321   | Iminodiacetic acid       | 134.044581 | 321.198 | 133.0375 | 1.45578 | C4H7NO4   | C19911 | [M+H]+  | BioDeepDB | 0.65842 | pos | 1 | 8717705.3  |
| M280T765   | Imipramine               | 280.194599 | 765.406 | 280.1939 | 2.49441 | C19H24N2  | C07049 | [M]+    | BioDeepDB | 0.65349 | pos | 1 | 14357655.2 |

|            |                          | C10H13N4O  |         |          |         |                        |        |            |           |         |     |   |            |
|------------|--------------------------|------------|---------|----------|---------|------------------------|--------|------------|-----------|---------|-----|---|------------|
| M348T231   | IMP                      | 348.049596 | 230.507 | 348.0471 | 7.1719  | 8P                     | C00130 | [M]-       | GNPS      | 0.68662 | neg | 1 | 853397.997 |
| M270T737   | Imperatorin              | 270.083347 | 737.198 | 270.0892 | 21.6729 | C16H14O4               | C09269 | [M]+       | mzCloud   | 0.84693 | pos | 1 | 2262203    |
| M115T33_2  | Indan-1-ol               | 115.05805  | 32.8715 | 134.0732 | 28.157  | C9H10O                 | C01710 | [M-H2O-H]- | MoNA      | 1       | neg | 1 | 151434.083 |
| M296T838   | Indican                  | 296.228602 | 837.524 | 295.1056 | 29.9963 | C14H17N06<br>C36H47N5O | C08481 | [M+H]+     | BioDeepDB | 0.00025 | pos | 2 | 11458879.1 |
| M614T484   | Indinavir                | 614.357786 | 483.973 | 613.3628 | 20.0043 | 4                      | C07051 | [M+H]+     | MoNA      | 0.98663 | pos | 1 | 2247668.59 |
| M118T402   | Indole                   | 118.0646   | 401.963 | 117.0578 | 4.0349  | C8H7N                  | C00463 | [M+H]+     | BioDeepDB | 0.01066 | pos | 2 | 16564886.1 |
| M176T359   | Indole-3-acetate         | 176.069504 | 359.32  | 175.0633 | 6.08992 | C10H9N02               | C00954 | [M+H]+     | mzCloud   | 0.0002  | pos | 2 | 94790689   |
| M161T724   | Indole-3-carboxylic acid | 161.045412 | 724.158 | 161.0477 | 14.2101 | C9H7N02                | C19837 | [M]-       | BioDeepDB | 0.80704 | neg | 1 | 1415085943 |
| M160T607   | Indoleacetaldehyde       | 160.075188 | 606.774 | 159.0684 | 3.04999 | C10H9NO                | C00637 | [M+H]+     | MoNA      | 0.78511 | pos | 1 | 4933972.91 |
| M204T301   | Indolebutyric acid       | 204.102115 | 300.782 | 203.0946 | 1.17262 | C12H13N02              | C11284 | [M+H]+     | mzCloud   | 0.65265 | pos | 1 | 3030301.71 |
| M206T475   | Indolelactate            | 206.080677 | 475.007 | 205.0739 | 2.42285 | C11H11N03              | C02043 | [M+H]+     | mzCloud   | 0.60932 | pos | 1 | 10308417.9 |
| M202T835   | Indolepyruvate           | 201.905091 | 835.329 | 203.0582 | 1.84312 | C11H9N03               | C00331 | [M-H]-     | BioDeepDB | 0.61378 | neg | 1 | 1675085.03 |
| M134T435   | Indolin-2-one            | 134.060523 | 434.589 | 133.0528 | 3.3332  | C8H7NO<br>C19H16C1N    | C12312 | [M+H]+     | mzCloud   | 0.61266 | pos | 1 | 3236587.41 |
| M358T659   | Indomethacin             | 358.082265 | 658.953 | 357.0768 | 5.01716 | 04<br>C10H12N4O        | C01926 | [M+H]+     | MoNA      | 0.76578 | pos | 1 | 4656579.68 |
| M268T312   | Inosine                  | 268.080934 | 312.058 | 268.0808 | 0.49863 | 5<br>C32H46N2O         | C00294 | [M]-       | BioDeepDB | 0.5803  | neg | 1 | 3203190.61 |
| M569T453_2 | Inuline                  | 569.301692 | 453.317 | 586.3254 | 28.5867 | 8                      | C08659 | [M+H2O]+   | MoNA      | 1       | pos | 1 | 8054845.46 |
| M308T211_1 | Iodotyrosine             | 307.980681 | 211.288 | 306.9705 | 9.29741 | C9H10IN03<br>C11H12I3N | C02515 | [M+H]+     | MoNA      | 0.99949 | pos | 1 | 4578192.09 |
| M571T618_2 | Iopanoic acid            | 570.790118 | 618.45  | 570.8002 | 17.6637 | 02                     | C08217 | [M]-       | BioDeepDB | 1       | neg | 1 | 2087855.08 |
| M332T802_1 | Ipратropium bromide      | 332.228144 | 801.685 | 332.2226 | 16.6882 | C20H30N03              | C07052 | [M]+       | BioDeepDB | 0.76452 | pos | 1 | 2185805.94 |

|                            |                                              |            |         |          |         |                                |        |            |           |         |     |   |            |
|----------------------------|----------------------------------------------|------------|---------|----------|---------|--------------------------------|--------|------------|-----------|---------|-----|---|------------|
| M329T626<br>_1             | Iprodione                                    | 329.034957 | 626.183 | 329.0334 | 4.73253 | C13H13C12<br>N3O3<br>C18H28N2O | C11208 | [M]-       | BioDeepDB | 0.78895 | neg | 1 | 1955122.08 |
| M301T597                   | Iprovalicarb                                 | 301.199927 | 596.795 | 320.21   | 27.6133 | 3                              | C18866 | [M-H2O-H]- | GNPS      | 1       | neg | 1 | 1582222.71 |
| M427T704                   | Irbesartan                                   | 427.221397 | 704.046 | 428.2325 | 8.86286 | C25H28N6O                      | C07469 | [M-H]-     | MoNA      | 0.77047 | neg | 1 | 547695.083 |
| M521T425<br>M586T542       | Iridin                                       | 521.14091  | 425.439 | 522.1373 | 20.89   | C24H26O13<br>C33H38N4O         | C10465 | [M-H]-     | MetaDNA   | 0.03053 | neg | 2 | 864250.232 |
| M436T379<br>_2             | Irinotecan                                   | 586.286855 | 541.673 | 586.2791 | 13.2281 | 6                              | C16641 | [M]-       | GNPS      | 0.93334 | neg | 1 | 281894.803 |
| M851T574<br>_1             | Irisxanthone<br>Isoastragaloside<br>I        | 436.103523 | 379.066 | 436.1006 | 6.7027  | C20H20O11                      | C10067 | [M]-       | mzCloud   | 0.96734 | neg | 1 | 1469662.51 |
| M324T518                   | Isobavachalcone                              | 324.141787 | 517.762 | 324.1362 | 17.3615 | C20H20O4                       | C08648 | [M]+       | OTCML     | 1       | pos | 1 | 12371481.8 |
| M195T833                   | Isobutyl 4-<br>hydroxybenzoate               | 195.100579 | 833.029 | 194.0943 | 5.07777 | C11H14O3                       | C20342 | [M+H]+     | OTCML     | 0.81224 | pos | 1 | 29182562.7 |
| M88T111                    | Isobutyric acid<br>Isobutyrylshikon          | 88.0752489 | 111.382 | 88.0524  | 4.15591 | C4H8O2                         | C02632 | [M]+       | BioDeepDB | 0.00019 | pos | 2 | 151975744  |
| M357T332<br>in<br>M515T464 | Isobutyrylshikon<br>Isochlorogenic<br>acid b | 357.129459 | 332.105 | 358.1416 | 13.7284 | C20H22O6                       | C17414 | [M-H]-     | OTCML     | 0.94706 | neg | 1 | 887075.6   |
| M515T464                   | Isocitric acid                               | 515.113375 | 464.011 | 516.1268 | 11.9369 | C25H24O12                      | C10468 | [M-H]-     | mzCloud   | 0.69132 | neg | 1 | 520736.872 |
| M191T625                   | Isocitric acid                               | 191.018443 | 624.642 | 192.027  | 6.58017 | C6H8O7                         | C00311 | [M-H]-     | BioDeepDB | 3.6E-08 | neg | 2 | 10516930.1 |
| M209T570                   | Isoeletic acid                               | 209.116243 | 570.01  | 208.1099 | 4.46097 | C12H16O3                       | C16975 | [M+H]+     | BioDeepDB | 0.00989 | pos | 2 | 11116735.9 |
| M222T655                   | Isoetharine                                  | 222.146055 | 654.542 | 239.1521 | 6.25129 | C13H21N03                      | C07053 | [M+H2O]+   | BioDeepDB | 0.78319 | pos | 1 | 14002178.4 |
| M165T496                   | Isoeugenol                                   | 165.09071  | 495.779 | 164.0837 | 1.61035 | C10H12O2                       | C10469 | [M+H]+     | BioDeepDB | 0.60778 | pos | 1 | 5759033.56 |
| M193T632                   | Isoferulic acid                              | 193.050007 | 632.288 | 194.0579 | 3.19447 | C10H10O4                       | C10470 | [M-H]-     | mzCloud   | 2.4E-10 | neg | 2 | 14652552.1 |
| M221T551                   | Isofraxidin                                  | 221.044183 | 550.932 | 222.0528 | 5.05422 | C11H10O5                       | C17480 | Unknown    | OTCML     | 7E-14   | neg | 2 | 4951523    |
| M128T225                   | Isoguvacine                                  | 128.070686 | 224.729 | 127.0633 | 0.63437 | C6H9NO2                        | C13694 | [M+H]+     | MoNA      | 0.98655 | pos | 1 | 93961370.7 |

|           |                       |            |         |          |         |               |        |                        |           |         |     |   |            |
|-----------|-----------------------|------------|---------|----------|---------|---------------|--------|------------------------|-----------|---------|-----|---|------------|
| M257T631  | Isoliquiritigenin     | 257.079965 | 630.507 | 256.0736 | 3.54423 | C15H12O4      | C08650 | [M+H] <sup>+</sup>     | mzCloud   | 0.61023 | pos | 1 | 14377815.7 |
| M419T512  | Isoliquiritin         | 419.129182 | 511.77  | 418.1264 | 8.87164 | C21H22O9      | C16978 | [M+H] <sup>+</sup>     | OTCML     | 0.8181  | pos | 1 | 3771893.66 |
| M422T766  | Isomangiferin         | 422.082342 | 765.588 | 422.0849 | 6.08699 | C19H18O11     | C16979 | [M] <sup>-</sup>       | OTCML     | 0.90485 | neg | 1 | 4865550.75 |
| M120T218  | Isoniazid             | 120.051945 | 217.866 | 137.0589 | 3.9902  | C6H7N3O       | C07054 | [M+H-H2O] <sup>+</sup> | MoNA      | 0.61745 | pos | 1 | 2002384.73 |
| M124T448  | Isonicotinic acid     | 124.038839 | 447.531 | 123.032  | 3.52691 | C6H5NO2       | C07446 | [M+H] <sup>+</sup>     | BioDeepDB | 0.62427 | pos | 1 | 36137589.4 |
| M89T291   | Isopentanol           | 89.059717  | 291.307 | 88.0888  | 3.83515 | C5H12O        | C07328 | [M+H] <sup>+</sup>     | BioDeepDB | 0.66702 | pos | 1 | 64447782.2 |
| M334T388  | Isopentenyl adenosine | 334.150131 | 388.326 | 335.1594 | 5.8282  | C15H21N5O4    | C16427 | [M-H] <sup>-</sup>     | MoNA      | 0.99736 | neg | 1 | 3852345.56 |
| M139T719  | Isophorone            | 139.112002 | 719.215 | 138.1045 | 1.62625 | C9H14O        | C14743 | [M+H] <sup>+</sup>     | mzCloud   | 0.59414 | pos | 1 | 28170698.2 |
| M245T671  | Isopimpinellin        | 245.043082 | 670.674 | 246.0528 | 9.96395 | C13H10O5      | C02162 | [M-H] <sup>-</sup>     | GNPS      | 0.80978 | neg | 1 | 1363108.56 |
| M179T674  | Isopropylparaben      | 179.069931 | 673.771 | 180.0786 | 7.77989 | C10H12O3      | C20343 | [M-H] <sup>-</sup>     | mzCloud   | 0.7837  | neg | 1 | 2341640.58 |
| M273T663  | Isoprothiolane        | 273.058444 | 663.287 | 290.0646 | 4.67851 | C12H18O4S     | C11111 | [M+H-H2O] <sup>+</sup> | BioDeepDB | 0.75844 | pos | 1 | 12219302.1 |
| M130T426  | Isoquinoline          | 130.064916 | 425.909 | 129.0578 | 1.23397 | C9H7N         | C06323 | [M+H] <sup>+</sup>     | mzCloud   | 0.59875 | pos | 1 | 5374791.41 |
| M315T732  | Isorhamnetin          | 315.050788 | 731.793 | 316.0583 | 0.03832 | C16H12O7      | C10084 | Unknown                | OTCML     | 0.00669 | neg | 2 | 749176.609 |
| M194T795  | Isouron               | 194.1254   | 795.165 | 211.1321 | 3.77904 | C10H17N3O2    | C18432 | [M+H-H2O] <sup>+</sup> | mzCloud   | 0.69723 | pos | 1 | 22218741   |
| M102T207  | Isovaleric acid       | 102.102326 | 207.393 | 102.0681 | 17.5701 | C5H10O2       | C08262 | [M] <sup>+</sup>       | BioDeepDB | 8.2E-07 | pos | 2 | 70792641.2 |
| M333T379  | Isoxaben              | 333.182815 | 379.194 | 332.1736 | 5.81998 | C18H24N2O4    | C18504 | [M+H] <sup>+</sup>     | mzCloud   | 0.72474 | pos | 1 | 2830645.41 |
| M162T126  | Isoxanthopterin       | 162.039026 | 125.598 | 179.0443 | 13.3321 | C6H5N5O2      | C03975 | [M+H-H2O] <sup>+</sup> | mzCloud   | 0.79493 | pos | 1 | 1045042.6  |
| M129T98   | Itaconic acid         | 129.017806 | 97.682  | 130.0266 | 11.7637 | C5H6O4        | C00490 | [M-H] <sup>-</sup>     | MoNA      | 1.1E-07 | neg | 2 | 130349754  |
| M687T95_1 | Itraconazole          | 687.232299 | 94.7467 | 704.2393 | 0.62011 | C35H38Cl2N8O4 | C07060 | [M+H-H2O] <sup>+</sup> | GNPS      | 0.9865  | pos | 1 | 41104055.4 |

|                            |                                                |                          |                    |                      |                    |                                    |                  |                  |                   |                    |            |        |                          |
|----------------------------|------------------------------------------------|--------------------------|--------------------|----------------------|--------------------|------------------------------------|------------------|------------------|-------------------|--------------------|------------|--------|--------------------------|
| M855T594<br>_2             | Ivermectin Bla                                 | 855.491292               | 593.841            | 874.5079             | 2.13311            | C48H74014<br>C27H36BrC             | C07970           | [M-H2O-H]-       | GNPS              | 0.99093            | neg        | 1      | 1268268.06               |
| M566T462                   | Jamaicamide A                                  | 566.152526               | 461.845            | 566.1547             | 3.83954            | 1N204                              | C18212           | [M]+             | BioDeepDB         | 0.99459            | pos        | 1      | 7850605.98               |
| M165T832                   | Jasmone                                        | 165.126957               | 831.709            | 164.1201             | 2.54008            | C11H160                            | C08490           | [M+H]+           | mzCloud           | 0.04608            | pos        | 2      | 10420490.2               |
| M426T557                   | Jervine                                        | 426.297397               | 556.816            | 425.293              | 6.3408             | C27H39N03                          | C10811           | [M+H]+           | OTCML             | 0.84281            | pos        | 1      | 20321023.1               |
| M299T721                   | Kaempferide                                    | 299.060014               | 721.058            | 300.0634             | 13.007             | C16H1206                           | C10098           | [M-H]-           | BioDeepDB         | 0.00018            | neg        | 2      | 1250560.64               |
| M577T480                   | Kaempferitrin                                  | 577.159721               | 479.541            | 578.1636             | 5.88516            | C27H30014                          | C16981           | [M-H]-           | mzCloud           | 0.66912            | neg        | 1      | 258098.823               |
| M285T698<br>M771T608<br>_2 | Kaempferol<br>Kaempferol 3-<br>sophorotrioside | 285.038974<br>771.199037 | 698.034<br>607.625 | 286.0477<br>772.2062 | 4.82365<br>0.13533 | C15H1006<br>C33H40021<br>C18H36N40 | C05903<br>C12635 | [M-H]-<br>[M-H]- | BioDeepDB<br>MoNA | 0.00033<br>0.98483 | neg<br>neg | 2<br>1 | 3726535.07<br>311885.216 |
| M484T463                   | Kanamycin                                      | 484.232027               | 463.271            | 484.2381             | 12.5408            | 11<br>C18H37N50                    | C01822           | [M]+             | MoNA              | 0.74012            | pos        | 1      | 986726.621               |
| M484T425                   | Kanamycin B                                    | 484.259945               | 424.572            | 483.254              | 2.74869            | 10                                 | C00825           | [M+H]+           | MoNA              | 0.9924             | pos        | 1      | 2779080.55               |
| M605T525                   | Kanokoside D                                   | 605.246512               | 524.56             | 624.2629             | 3.30696            | C27H44016<br>C15H21N30             | C17431           | [M-H2O-H]-       | GNPS              | 0.99359            | neg        | 1      | 3342928.93               |
| M482T68                    | Karakin                                        | 482.082298               | 67.6441            | 483.0973             | 15.9568            | 15                                 | C08495           | [M-H]-           | MoNA              |                    | 1 neg      | 1      | 111015.715               |
| M378T724                   | Karakoline                                     | 378.263052               | 723.682            | 377.2566             | 2.17841            | C22H35N04                          | C08693           | [M+H]+           | MoNA              | 0.99104            | pos        | 1      | 11417783                 |
| M213T104<br>M238T777<br>_2 | Kavain                                         | 213.086391               | 104.493            | 230.0943             | 2.20163            | C14H1403<br>C13H16C1N              | C09947           | [M+H-H2O]+       | OTCML             | 0.9911             | pos        | 1      | 4595643.32               |
| M394T293<br>_2             | Ketamine<br>Ketanserin                         | 238.09907<br>394.158573  | 777.245<br>292.621 | 237.092<br>395.1645  | 0.86644<br>3.42247 | 0<br>03<br>C22H22FN3               | C07525<br>C07464 | [M+H]+<br>[M-H]- | MoNA<br>BioDeepDB | 0.62814<br>0.99382 | pos<br>neg | 1<br>1 | 10406769.7<br>449600.758 |
| M129T99                    | Ketoleucine                                    | 129.054233               | 98.9649            | 130.063              | 11.5116            | C6H1003                            | C00233           | [M-H]-           | MoNA              | 3.1E-08            | neg        | 2      | 6874518.56               |
| M253T726                   | Ketoprofen                                     | 253.084519               | 725.713            | 254.0943             | 9.80413            | C16H1403                           | C01716           | [M-H]-           | BioDeepDB         | 0.10454            | neg        | 2      | 2609041.55               |
| M256T638                   | Ketorolac                                      | 256.094844               | 637.996            | 255.0895             | 7.54455            | C15H13N03                          | C07062           | [M+H]+           | mzCloud           | 0.74388            | pos        | 1      | 25124149.3               |

|                      |                                              |            |         |          |         |                        |        |                        |           |         |     |   |            |
|----------------------|----------------------------------------------|------------|---------|----------|---------|------------------------|--------|------------------------|-----------|---------|-----|---|------------|
| M260T350             | Khellin                                      | 260.074658 | 349.911 | 260.0685 | 23.6793 | C14H1205               | C09010 | [M] <sup>+</sup>       | mzCloud   | 0.9484  | pos | 1 | 28438586   |
| M216T777             | Kinetin                                      | 216.084287 | 777.245 | 215.0807 | 17.0712 | C10H9N5O               | C08272 | [M+H] <sup>+</sup>     | BioDeepDB | 0.78833 | pos | 1 | 88157655.6 |
| M325T209<br>M143T403 | Kojibiose                                    | 325.11046  | 208.905 | 342.1162 | 5.21074 | C12H22O11              | C19632 | [M+H-H2O] <sup>+</sup> | BioDeepDB | 1.3E-14 | pos | 2 | 1291269240 |
| _1<br>M841T287       | Kojic acid                                   | 143.033349 | 403.447 | 142.0266 | 3.68691 | C6H6O4                 | C14516 | [M+H] <sup>+</sup>     | mzCloud   | 6.6E-06 | pos | 2 | 220683714  |
| _1<br>M692T685       | KRN 7000                                     | 840.748225 | 287.148 | 857.732  | 28.1406 | C50H99N09              | C16892 | [M+H-H2O] <sup>+</sup> | BioDeepDB | 1       | pos | 1 | 2367616.11 |
| _1                   | Kuwanon G<br>L-2-Aminoethyl                  | 692.220256 | 684.985 | 692.2258 | 7.95345 | C40H36O11<br>C5H13N2O6 | C10099 | [M] <sup>+</sup>       | OTCML     | 0.99896 | pos | 1 | 1059239.82 |
| M229T100             | seryl phosphate<br>L-2-                      | 229.053071 | 100.146 | 228.0511 | 23.158  | P                      | C03872 | [M+H] <sup>+</sup>     | MetaDNA   | 0.00185 | pos | 2 | 28512554.3 |
| M147T755             | Hydroxyglutaric                              | 147.027625 | 754.814 | 148.0372 | 15.635  | C5H8O5                 | C03196 | [M-H] <sup>-</sup>     | BioDeepDB | 1.5E-12 | neg | 2 | 7136982    |
| M95T176<br>M167T36_2 | L-3-Cyanoalanine<br>L-4-<br>Hydroxyphenylgly | 95.0234938 | 176.104 | 114.0429 | 10.6944 | C4H6N2O2               | C02512 | [M-H2O-H] <sup>-</sup> | BioDeepDB | 0.7162  | neg | 1 | 2762600.79 |
|                      |                                              | 167.012471 | 35.8675 | 167.0582 | 2.43474 | C8H9N03                | C12323 | [M] <sup>+</sup>       | BioDeepDB | 3.1E-05 | pos | 2 | 371408345  |
| M90T226              | L-Alanine                                    | 90.0549999 | 226.202 | 89.0477  | 0.00096 | C3H7N02                | C00041 | [M+H] <sup>+</sup>     | BioDeepDB | 0.57573 | pos | 1 | 46995810   |
| M120T99<br>M165T264  | L-Allothreonine                              | 120.101509 | 98.9918 | 119.0582 | 0.82296 | C4H9N03                | C05519 | [M+H] <sup>+</sup>     | BioDeepDB | 0.58754 | pos | 1 | 9855715.74 |
| _2                   | L-Arabinonate<br>L-Arabinono-1,4-            | 165.039606 | 264.434 | 166.0477 | 4.95336 | C5H10O6                | C00545 | [M-H] <sup>-</sup>     | MetaDNA   | 0.01129 | neg | 2 | 14793360.5 |
| M148T128             | lactone                                      | 148.041622 | 128.279 | 148.0372 | 29.8742 | C5H8O5                 | C01114 | [M] <sup>-</sup>       | MetaDNA   | 0.0565  | neg | 2 | 18738472.9 |
| M131T274             | L-Arabinose                                  | 131.034075 | 273.62  | 150.0528 | 2.55524 | C5H10O5                | C00259 | [M-H2O-H] <sup>-</sup> | BioDeepDB | 0.61938 | neg | 1 | 13953372.6 |
| M175T82              | L-Arginine                                   | 174.937258 | 82.0569 | 174.1117 | 5.04679 | C6H14N4O2              | C00062 | [M+H] <sup>+</sup>     | BioDeepDB | 2E-05   | pos | 2 | 9757165.97 |
| M228T439             | L-Arogenate                                  | 228.085776 | 439.021 | 227.0794 | 3.94433 | C10H13N05              | C00826 | [M+H] <sup>+</sup>     | MetaDNA   | 0.01809 | pos | 2 | 59886269   |
| M442T622             | L-Ascorbic acid,<br>6-octadecanoate          | 442.290847 | 621.547 | 442.2931 | 4.99016 | C24H42O7               | C20340 | [M] <sup>-</sup>       | mzCloud   | 0.81029 | neg | 1 | 1270271.08 |
| M133T87              | L-Asparagine                                 | 133.059124 | 86.6643 | 132.0535 | 12.4139 | C4H8N2O3               | C00152 | [M+H] <sup>+</sup>     | BioDeepDB | 1.2E-14 | pos | 2 | 4295519780 |

|            |                                    |            |         |          |         |                       |        |            |           |             |   |            |
|------------|------------------------------------|------------|---------|----------|---------|-----------------------|--------|------------|-----------|-------------|---|------------|
| M116T278_1 | L-Aspartate-semialdehyde           | 116.033316 | 278.267 | 117.0426 | 17.3091 | C4H7N03               | C00441 | [M-H]-     | MetaDNA   | 5.4E-05 neg | 2 | 12041760.1 |
| M133T82    | L-Aspartic acid                    | 133.031841 | 81.8855 | 133.0375 | 4.25003 | C4H7N04               | C00049 | [M]-       | BioDeepDB | 0.03026 neg | 2 | 15660120.3 |
| M162T92    | L-Carnitine                        | 162.111449 | 91.7174 | 161.1052 | 5.55333 | C7H15N03<br>C7H14N2O4 | C00318 | [M+H]+     | BioDeepDB | 9.7E-24 pos | 2 | 389191976  |
| M221T85    | L-Cystathionine                    | 221.059333 | 85.0169 | 222.0674 | 3.57961 | S                     | C02291 | [M-H]-     | GNPS      | 0.61025 neg | 1 | 3622811.88 |
| M241T106_2 | L-Cystine                          | 241.128403 | 105.503 | 240.0238 | 2.78358 | S2                    | C00491 | [M+H]+     | BioDeepDB | 0.60439 pos | 1 | 14149149.5 |
| M198T152_1 | L-Dopa                             | 198.076183 | 152.375 | 197.0688 | 0.07993 | C9H11N04              | C00355 | [M+H]+     | BioDeepDB | 0.59423 pos | 1 | 58116163.7 |
| M101T235   | L-Erythrulose                      | 101.021928 | 234.972 | 120.0423 | 19.6216 | C4H8O4                | C02045 | [M-H2O-H]- | BioDeepDB | 2.1E-06 neg | 2 | 267319445  |
| M165T114   | L-Fucose                           | 165.075424 | 114.15  | 164.0685 | 2.13054 | C6H12O5               | C00507 | [M+H]+     | BioDeepDB | 0.59734 pos | 1 | 19419782.2 |
| M148T91    | L-Glutamic acid                    | 148.059358 | 90.7088 | 147.0532 | 4.26122 | C5H9N04               | C00025 | [M+H]+     | BioDeepDB | 7.3E-19 pos | 2 | 2242104509 |
| M145T90    | L-Glutamine                        | 145.059942 | 89.8937 | 146.0691 | 6.90403 | C5H10N2O3             | C00064 | [M-H]-     | BioDeepDB | 1.2E-07 neg | 2 | 64910856.3 |
| M177T732   | L-Gulonolactone                    | 177.037803 | 731.793 | 178.0477 | 14.8069 | C6H10O6               | C01040 | [M-H]-     | MetaDNA   | 0.00143 neg | 2 | 12621283.3 |
| M179T343   | L-Gulose                           | 179.0562   | 342.819 | 180.0634 | 0.42463 | C6H12O6               | C15923 | [M-H]-     | BioDeepDB | 3.9E-10 neg | 2 | 53374067.7 |
| M156T85    | L-Histidine                        | 156.076565 | 84.5768 | 155.0695 | 1.3538  | C6H9N3O2              | C00135 | [M+H]+     | BioDeepDB | 4.9E-33 pos | 2 | 94058063.3 |
| M141T69_2  | L-Histidinol<br>L-Homocysteic acid | 141.090519 | 69.2834 | 141.0902 | 2.25856 | C6H11N3O              | C00860 | [M]+       | BioDeepDB | 0.61907 pos | 1 | 6295578.46 |
| M164T326   | L-Homoserine                       | 164.001225 | 325.901 | 183.0201 | 2.95876 | C4H9N05S              | C16511 | [M-H2O-H]- | BioDeepDB | 0.68118 neg | 1 | 1024711.88 |
| M120T101   | L-Homoserine                       | 120.065114 | 101.161 | 119.0582 | 3.01698 | C4H9N03               | C00263 | [M+H]+     | BioDeepDB | 0.61117 pos | 1 | 25746257.4 |
| M182T334   | L-Iditol                           | 182.081185 | 333.655 | 182.079  | 11.7882 | C6H14O6               | C01507 | [M]-       | mzCloud   | 0.73903 neg | 2 | 5167851.72 |
| M132T485   | L-Isoleucine                       | 132.100317 | 485.471 | 131.0946 | 8.27511 | C6H13N02<br>C10H12N2O | C00407 | [M+H]+     | BioDeepDB | 3E-11 pos   | 2 | 81677399.7 |
| M209T830   | L-Kynurenine                       | 209.152931 | 830.193 | 208.0848 | 3.55982 | 3                     | C00328 | [M+H]+     | BioDeepDB | 0.00258 pos | 2 | 40235232.8 |

|                            |                                                          |            |         |          |         |                       |        |                       |           |         |     |   |            |
|----------------------------|----------------------------------------------------------|------------|---------|----------|---------|-----------------------|--------|-----------------------|-----------|---------|-----|---|------------|
| M132T246<br>_1             | L-Leucine                                                | 132.052342 | 246.372 | 131.0946 | 4.5428  | C6H13NO2              | C00123 | [M+H] <sup>+</sup>    | BioDeepDB | 1.4E-25 | pos | 2 | 16874407.2 |
| M145T67                    | L-Lysinamide                                             | 145.121866 | 66.9841 | 145.1215 | 2.52546 | C6H15N3O              | C01930 | [M] <sup>+</sup>      | MoNA      | 0.99189 | pos | 1 | 5241199.12 |
| M147T80                    | L-Lysine                                                 | 147.113887 | 79.643  | 146.1055 | 6.34149 | C6H14N2O2             | C00047 | [M+H] <sup>+</sup>    | BioDeepDB | 1.1E-20 | pos | 2 | 521160180  |
| M133T243<br>M150T151<br>_2 | L-Malic acid<br>L-Methionine<br>L-Methionine S-<br>oxide | 133.013341 | 243.386 | 134.0215 | 6.45549 | C4H6O5                | C00149 | [M-H] <sup>-</sup>    | BioDeepDB | 1.3E-15 | neg | 2 | 5931203.47 |
| M166T92                    | L-Methionine S-<br>oxide                                 | 150.058293 | 151.016 | 149.051  | 0.11529 | C5H11NO2S             | C00073 | [M+H] <sup>+</sup>    | mzCloud   | 0.57667 | pos | 1 | 1392989773 |
| M166T92                    | L-Methionine S-<br>oxide                                 | 166.052497 | 91.7174 | 165.046  | 4.69345 | C5H11NO3S             | C02989 | [M+H] <sup>+</sup>    | mzCloud   | 2.3E-06 | pos | 2 | 370414399  |
| M288T411                   | Octanoylcarnitin<br>L-                                   | 288.22026  | 410.542 | 287.2097 | 11.3925 | C15H29NO4             | C02838 | [M+H] <sup>+</sup>    | MoNA      | 0.00035 | pos | 2 | 6054762.9  |
| M382T800<br>M164T327<br>_1 | Palmitoylcarniti<br>L-                                   | 382.326631 | 800.484 | 399.3349 | 2.18398 | C23H45NO4             | C02990 | [M+H-2O] <sup>+</sup> | MoNA      | 0.62411 | pos | 1 | 2052617.58 |
| M255T429                   | L-Phenylalanine<br>L-                                    | 164.069225 | 327.449 | 165.079  | 8.2484  | C9H11NO2<br>C6H15N4O5 | C00079 | [M-H] <sup>-</sup>    | BioDeepDB | 7.2E-20 | neg | 2 | 210614745  |
| M255T429                   | Phosphoarginine                                          | 255.085303 | 428.735 | 254.078  | 0.08179 | P                     | C05945 | [M+H] <sup>+</sup>    | MoNA      | 0.57725 | pos | 1 | 20782421.7 |
| M115T202                   | L-Prolinamide                                            | 115.086137 | 202.149 | 114.0793 | 3.81547 | C5H10N2O              | C19781 | [M+H] <sup>+</sup>    | MetaDNA   | 0.01065 | pos | 2 | 28064264.6 |
| M116T78                    | L-Proline                                                | 116.070131 | 78.3841 | 115.0633 | 3.83482 | C5H9NO2               | C00148 | [M+H] <sup>+</sup>    | BioDeepDB | 8.4E-18 | pos | 2 | 212952950  |
| M131T235                   | L-Ribulose                                               | 131.034095 | 234.972 | 150.0528 | 2.40472 | C5H10O5               | C00310 | [M-2H-H] <sup>-</sup> | BioDeepDB | 0.00144 | neg | 2 | 40927459.3 |
| M105T87                    | L-Serine                                                 | 105.037064 | 87.426  | 105.0426 | 2.68131 | C3H7NO3               | C00065 | [M] <sup>-</sup>      | BioDeepDB | 4.9E-07 | neg | 2 | 2675963.01 |
| M180T753                   | L-Sorbose                                                | 180.058216 | 753.315 | 180.0634 | 28.7899 | C6H12O6               | C00247 | [M] <sup>-</sup>      | BioDeepDB | 0.21004 | neg | 2 | 6890130.68 |
| M188T488                   | L-Targinine                                              | 188.126885 | 488.437 | 188.1273 | 2.2067  | C7H16N4O2             | C03884 | [M] <sup>+</sup>      | BioDeepDB | 0.63706 | pos | 1 | 11312465.3 |
| M175T232                   | L-Theanine                                               | 175.107455 | 231.773 | 174.1004 | 1.2604  | C7H14N2O3             | C01047 | [M+H] <sup>+</sup>    | GNPS      | 0.59112 | pos | 1 | 15107837.9 |
| M149T688                   | L-Threo-2-<br>pentulose                                  | 149.043238 | 688.189 | 150.0528 | 15.3391 | C5H10O5               | C00312 | [M-H] <sup>-</sup>    | MetaDNA   | 0.00022 | neg | 2 | 4867943.2  |
| M182T549                   | L-threo-3-<br>Phenylserine                               | 182.080709 | 549.375 | 181.0739 | 2.5651  | C9H11NO3              | C03290 | [M+H] <sup>+</sup>    | mzCloud   | 0.62777 | pos | 1 | 40668557.9 |



|                      |                                |            |         |          |         |                        |        |                        |           |             |   |            |
|----------------------|--------------------------------|------------|---------|----------|---------|------------------------|--------|------------------------|-----------|-------------|---|------------|
| M120T89              | L-Threonine                    | 120.065149 | 88.6838 | 119.0582 | 2.72071 | C4H9NO3<br>C11H12N2O   | C00188 | [M+H] <sup>+</sup>     | BioDeepDB | 2.2E-30 pos | 2 | 1091794208 |
| M203T376<br>M182T218 | L-Tryptophan                   | 203.081584 | 376.15  | 204.0899 | 1.15412 | 2                      | C00078 | [M-H] <sup>-</sup>     | BioDeepDB | 7.3E-07 neg | 2 | 82757996.9 |
| _2                   | L-Tyrosine                     | 182.079961 | 217.866 | 181.0739 | 6.67544 | C9H11NO3               | C00082 | [M+H] <sup>+</sup>     | BioDeepDB | 5.3E-14 pos | 2 | 2258159460 |
| M118T139             | L-Valine                       | 118.086354 | 138.766 | 117.079  | 0.18319 | C5H11NO2<br>C19H24N2O  | C00183 | [M+H] <sup>+</sup>     | BioDeepDB | 7.9E-23 pos | 2 | 1046687354 |
| M328T829             | Labetalol                      | 328.175409 | 829.321 | 328.1787 | 10.0291 | 3                      | C07063 | [M] <sup>-</sup>       | BioDeepDB | 0.67926 neg | 1 | 179165.721 |
| M341T278             | Lactose                        | 341.106044 | 278.267 | 342.1162 | 8.44443 | C12H22O11<br>C12H23O14 | C00243 | [M-H] <sup>-</sup>     | mzCloud   | 6.5E-11 neg | 2 | 1820861.06 |
| M423T107             | Lactose 6-phosphate            | 423.087237 | 106.513 | 422.0825 | 6.00001 | P                      | C05396 | [M+H] <sup>+</sup>     | MetaDNA   | 0.00211 pos | 2 | 71197709.9 |
| M403T472             | Lamiide                        | 403.122359 | 471.768 | 422.1424 | 4.09484 | C17H26O12<br>C8H11N3O3 | C11644 | [M-H2O-H] <sup>-</sup> | mzCloud   | 0.07193 neg | 2 | 3528517.99 |
| M228T145             | Lamivudine                     | 228.049793 | 144.706 | 229.0521 | 21.7369 | S                      | C07065 | [M-H] <sup>-</sup>     | MoNA      | 0.83904 neg | 1 | 2630666.84 |
| M459T571             | Lankacidin C                   | 459.222362 | 570.599 | 459.2257 | 7.26776 | C25H33NO7              | C15758 | [M] <sup>-</sup>       | BioDeepDB | 0.99857 neg | 1 | 1205715.92 |
| M426T791             | Lanosterin                     | 426.385818 | 790.802 | 426.3862 | 0.89514 | C30H50O                | C01724 | [M] <sup>+</sup>       | BioDeepDB | 0.61033 pos | 1 | 10856153.8 |
| M246T421<br>M584T674 | Lansoprazole                   | 246.096145 | 420.799 | 247.1056 | 8.80084 | C10H17NO6<br>C32H44N2O | C01594 | [M-H] <sup>-</sup>     | MoNA      | 0.95991 neg | 1 | 569730.067 |
| _2                   | Lappaconitine                  | 584.303814 | 673.771 | 584.3098 | 10.2445 | 8                      | C08694 | [M] <sup>-</sup>       | MoNA      | 0.99971 neg | 1 | 28853005.3 |
| M341T744             | Lariciresinol                  | 341.135502 | 744.192 | 360.1573 | 9.99084 | C20H24O6               | C10646 | [M-H2O-H] <sup>-</sup> | BioDeepDB | 0.99966 neg | 1 | 1804345.74 |
| M369T807             | Lathosterol                    | 369.344035 | 807.232 | 386.3549 | 9.28893 | C27H46O<br>C22H31NO5   | C01189 | [M+H-H2O] <sup>+</sup> | BioDeepDB | 0.68967 pos | 1 | 8357047.7  |
| M420T405             | Latrunculin A                  | 420.186441 | 405.254 | 421.1923 | 3.37317 | S<br>C20H29NO5         | C16901 | [M-H] <sup>-</sup>     | BioDeepDB | 0.99372 neg | 1 | 207249.964 |
| M394T337             | Latrunculin B                  | 394.169436 | 336.681 | 395.1766 | 0.09069 | S                      | C19904 | [M-H] <sup>-</sup>     | BioDeepDB | 0.98467 neg | 1 | 1718877.21 |
| M307T468<br>M318T106 | Lauryltrimethylaminium bromide | 307.183845 | 467.706 | 307.1875 | 11.8986 | Br                     | C20389 | [M] <sup>+</sup>       | mzCloud   | 0.92505 pos | 1 | 2801455.11 |
| _1                   | Lecanoric acid                 | 318.080864 | 105.537 | 318.074  | 21.5779 | C16H14O7               | C02868 | [M] <sup>-</sup>       | BioDeepDB | 1 neg       | 1 | 5202396.61 |

|          |                          |            |         |          |         |           |  |           |                        |           |         |     |   |            |  |  |  |  |
|----------|--------------------------|------------|---------|----------|---------|-----------|--|-----------|------------------------|-----------|---------|-----|---|------------|--|--|--|--|
| M235T376 |                          |            |         |          |         |           |  | C13H18N2O |                        |           |         |     |   |            |  |  |  |  |
| _2       | Lenacil                  | 235.143189 | 376.409 | 234.1368 | 3.77007 | 2         |  | C11200    | [M+H] <sup>+</sup>     | mzCloud   | 0.61936 | pos | 1 | 23123832   |  |  |  |  |
| M247T430 | Lenticin                 | 247.142441 | 430.131 | 246.1368 | 6.61497 | 2         |  | C14H18N2O |                        |           |         |     |   |            |  |  |  |  |
| M310T202 | Leonurine                | 310.139171 | 201.897 | 311.1481 | 5.39737 | 5         |  | C09213    | [M+H] <sup>+</sup>     | MoNA      | 0.66812 | pos | 1 | 9218053.95 |  |  |  |  |
| M406T775 | Leu-Leu-Tyr              | 406.233406 | 774.892 | 407.242  | 3.29534 | 5         |  | C14H21N3O |                        |           |         |     |   |            |  |  |  |  |
| M132T223 | Leucine                  | 132.101387 | 223.474 | 131.0946 | 0.17204 | 2         |  | C16985    | [M-H] <sup>-</sup>     | OTCML     | 0.77079 | neg | 1 | 1034351.71 |  |  |  |  |
| M606T568 | Leukotriene C4           | 606.28354  | 567.543 | 625.3033 | 2.26046 | 9S        |  | C21H33N3O |                        |           |         |     |   |            |  |  |  |  |
| M477T526 | Leukotriene D4           | 477.235412 | 526.124 | 496.2607 | 14.4547 | 6S        |  | C11331    | [M-H] <sup>-</sup>     | MoNA      | 0.99357 | neg | 1 | 406455.596 |  |  |  |  |
| M440T579 | Leukotriene E4           | 440.245425 | 578.816 | 439.2392 | 2.38752 | S         |  | C6H13N02  | [M+H] <sup>+</sup>     | BioDeepDB | 0.57878 | pos | 1 | 4339717221 |  |  |  |  |
| M549T556 | Leukotriene E4           | 440.245425 | 578.816 | 439.2392 | 2.38752 | S         |  | C30H47N3O |                        |           |         |     |   |            |  |  |  |  |
| _4       | Leukotriene F4           | 549.26621  | 555.524 | 568.2818 | 5.09764 | 8S        |  | C02166    | [M-H2O-H] <sup>-</sup> | BioDeepDB | 0.99125 | neg | 1 | 1925860.79 |  |  |  |  |
| M240T345 | Levamisole hydrochloride | 240.049223 | 344.555 | 240.0488 | 1.76285 | . HCl     |  | C25H40N2O |                        |           |         |     |   |            |  |  |  |  |
| M171T145 | Levetiracetam            | 171.112236 | 145.382 | 170.1055 | 3.15333 | C8H14N2O2 |  | C05951    | [M-H2O-H] <sup>-</sup> | MoNA      | 0.94975 | neg | 1 | 1084498.73 |  |  |  |  |
| M362T649 | Levofloxacin             | 362.152014 | 649.338 | 361.1438 | 2.59041 | 04        |  | C23H37N05 |                        |           |         |     |   |            |  |  |  |  |
| M312T509 | Levonorgestrel           | 312.21569  | 508.883 | 312.2089 | 21.7489 | C21H28O2  |  | C05952    | [M+H] <sup>+</sup>     | BioDeepDB | 0.79912 | pos | 1 | 13852386.8 |  |  |  |  |
| M257T678 | Levorphanol              | 257.175001 | 678.416 | 257.178  | 11.6598 | C17H23NO  |  | C06462    | [M-H2O-H] <sup>-</sup> | BioDeepDB | 0.84775 | neg | 1 | 14818951.4 |  |  |  |  |
| M162T828 | Lichenin                 | 162.048351 | 827.821 | 162.0528 | 27.4537 | C6H10O5   |  | C07906    | [M] <sup>+</sup>       | GNPS      | 0.98995 | pos | 1 | 10038463   |  |  |  |  |
| M425T626 | Licoricidin              | 425.231566 | 626.042 | 424.225  | 1.6098  | C26H32O5  |  | C07841    | [M+H] <sup>+</sup>     | MoNA      | 0.66366 | pos | 1 | 6991247.02 |  |  |  |  |
| M234T78  | Lidocaine                | 234.180163 | 78.3841 | 234.1732 | 29.7318 | C14H22N2O |  | C07660    | [M+H] <sup>+</sup>     | mzCloud   | 0.6295  | pos | 1 | 10655825.7 |  |  |  |  |
| M173T176 | Ligustilide              | 173.091673 | 175.952 | 190.0994 | 1.57646 | C12H14O2  |  | C08153    | [M] <sup>+</sup>       | BioDeepDB | 0.98433 | pos | 1 | 19605885.9 |  |  |  |  |
| M471T725 | Limonin                  | 471.199306 | 725.212 | 470.1941 | 4.39214 | C26H30O8  |  | C08014    | [M] <sup>-</sup>       | BioDeepDB | 0.82057 | neg | 1 | 1919772.82 |  |  |  |  |
|          |                          |            |         |          |         |           |  | C00478    | [M] <sup>-</sup>       | MetaDNA   | 0.04084 | neg | 2 | 74339881.5 |  |  |  |  |
|          |                          |            |         |          |         |           |  | C16986    | [M+H] <sup>+</sup>     | GNPS      | 0.75317 | pos | 1 | 2831559.64 |  |  |  |  |
|          |                          |            |         |          |         |           |  | C07073    | [M] <sup>+</sup>       | MoNA      | 0.92639 | pos | 1 | 3581132.56 |  |  |  |  |
|          |                          |            |         |          |         |           |  | C16987    | [M+H-H2O] <sup>+</sup> | OTCML     | 0.98943 | pos | 1 | 6451325.24 |  |  |  |  |
|          |                          |            |         |          |         |           |  | C03514    | [M+H] <sup>+</sup>     | mzCloud   | 0.64003 | pos | 1 | 16490406.9 |  |  |  |  |

|                      |                             |            |         |          |         |                        |        |                        |           |         |     |   |            |
|----------------------|-----------------------------|------------|---------|----------|---------|------------------------|--------|------------------------|-----------|---------|-----|---|------------|
| M155T488<br>_2       | Linalool                    | 155.142671 | 488.437 | 154.1358 | 2.38586 | C10H18O<br>C18H34N2O   | C03985 | [M+H] <sup>+</sup>     | MoNA      | 0.60994 | pos | 1 | 4827225.06 |
| M406T704             | Lincomycin                  | 406.210575 | 704.046 | 406.2138 | 7.83391 | 6S                     | C06812 | [M] <sup>-</sup>       | mzCloud   | 0.79987 | neg | 1 | 2237740.27 |
| M213T341             | Linderene                   | 213.122744 | 340.548 | 230.1307 | 2.35709 | C15H18O2<br>C16H20FN3  | C16988 | [M+H-H2O] <sup>+</sup> | OTCML     | 0.99148 | pos | 1 | 6646172.92 |
| M320T530             | Linezolid                   | 320.13244  | 529.713 | 337.1438 | 12.2624 | 04                     | C08146 | [M+H-H2O] <sup>+</sup> | MoNA      | 0.9332  | pos | 1 | 3290628.08 |
| M263T836             | Linoleic acid               | 263.235492 | 836.034 | 280.2402 | 10.3576 | C18H32O2<br>C9H10C12N  | C01595 | [M+H-H2O] <sup>+</sup> | BioDeepDB | 4.3E-14 | pos | 2 | 8255445.52 |
| M229T642             | Linuron                     | 228.993062 | 641.603 | 248.0119 | 1.95519 | 202<br>C16H27N01       | C11007 | [M-H2O-H] <sup>-</sup> | BioDeepDB | 0.99046 | neg | 1 | 624918.388 |
| M390T95<br>M651T655  | Linustatin                  | 390.130927 | 95.2383 | 409.1584 | 23.2806 | 1<br>C15H12I3N         | C08333 | [M-H2O-H] <sup>-</sup> | MetaDNA   | 0.03997 | neg | 2 | 12335529.3 |
| _1                   | Liothyronine                | 650.798008 | 655.321 | 650.79   | 12.3052 | 04                     | C02465 | [M] <sup>-</sup>       | BioDeepDB | 0.84563 | neg | 1 | 1256998.81 |
| M206T257             | Lipoamide                   | 206.065083 | 257.155 | 205.0595 | 8.2149  | C8H15N0S2              | C00248 | [M+H] <sup>+</sup>     | BioDeepDB | 0.9309  | pos | 1 | 10101002.4 |
| M206T206             | Lipoate                     | 206.044455 | 206.399 | 206.0435 | 4.53451 | C8H14O2S2              | C00725 | [M] <sup>-</sup>       | mzCloud   | 0.70524 | neg | 1 | 598869.541 |
| M335T838<br>M417T511 | Lipoxin B4                  | 335.217861 | 837.524 | 352.225  | 0.87874 | C20H32O5               | C06315 | [M+H-H2O] <sup>+</sup> | GNPS      | 0.58534 | pos | 1 | 32770891.1 |
| _1                   | Liquiritin                  | 417.117726 | 510.673 | 418.1264 | 2.81502 | C21H22O9               | C16989 | Unknown                | OTCML     | 1.3E-09 | neg | 2 | 26890981.5 |
| M376T705             | Lithocholic acid            | 376.303163 | 704.715 | 376.2977 | 14.5164 | C24H40O3               | C03990 | [M] <sup>+</sup>       | BioDeepDB | 0.72963 | pos | 1 | 50694186.8 |
| M416T528             | Lithocholic acid<br>glycine | 416.322797 | 528.185 | 433.3192 | 26.4968 | C26H43N04<br>C26H45N05 | C15557 | [M+H-H2O] <sup>+</sup> | MoNA      | 0.9872  | pos | 1 | 727370.286 |
| M484T617<br>M376T411 | Lithocholyltaurine          | 484.311744 | 617.133 | 483.3018 | 5.41758 | S                      | C02592 | [M+H] <sup>+</sup>     | MoNA      | 0.80407 | pos | 1 | 3042467.32 |
| _1                   | Loganic acid                | 376.134764 | 411.444 | 376.1369 | 5.80355 | C16H24O10              | C01512 | [M] <sup>-</sup>       | OTCML     | 0.75234 | neg | 1 | 395685.747 |
| M371T401             | Loganin                     | 371.133642 | 400.641 | 390.1526 | 1.5303  | C17H26O10<br>C29H33C1N | C01433 | [M-H2O-H] <sup>-</sup> | mzCloud   | 0.59635 | neg | 1 | 695372.738 |
| M459T519             | Loperamide                  | 459.215671 | 519.257 | 476.2231 | 0.00984 | 202<br>C37H48N4O       | C07080 | [M+H-H2O] <sup>+</sup> | mzCloud   | 0.58588 | pos | 1 | 7232288.58 |
| M628T605             | Lopinavir                   | 628.360924 | 605.264 | 628.3625 | 2.50812 | 5                      | C12871 | [M] <sup>+</sup>       | GNPS      | 0.77999 | pos | 1 | 1054104.72 |

|                      |                                   | C22H23C1N  |         |          |         |                        |        |                        |           |         |     |   |            |
|----------------------|-----------------------------------|------------|---------|----------|---------|------------------------|--------|------------------------|-----------|---------|-----|---|------------|
| M423T838             | Losartan                          | 423.173886 | 837.524 | 422.1622 | 10.365  | 60                     | C07072 | [M+H] <sup>+</sup>     | BioDeepDB | 0.67601 | pos | 1 | 12262813   |
| M242T268             | Lotaustralin                      | 242.102125 | 268.419 | 261.1212 | 2.82924 | C11H19N06<br>C18H18C1N | C08334 | [M-H2O-H] <sup>-</sup> | MoNA      | 0.63257 | neg | 1 | 783686.796 |
| M327T811             | Loxapine                          | 327.112722 | 811.292 | 327.1138 | 3.29453 | 30<br>C20H32F2O        | C07104 | [M] <sup>-</sup>       | GNPS      | 0.62703 | neg | 1 | 5537551.86 |
| M371T813             | Lubiprostone                      | 371.200424 | 812.68  | 390.2218 | 8.04313 | 5<br>C12H10N4O         | C13707 | [M-H2O-H] <sup>-</sup> | BioDeepDB | 0.67295 | neg | 1 | 15303456.5 |
| M241T378             | Lumichrome                        | 241.071379 | 377.64  | 242.0804 | 7.13703 | 2<br>C25H31N3O         | C01727 | [M-H] <sup>-</sup>     | BioDeepDB | 0.99848 | neg | 1 | 2849007.88 |
| M436T518<br>M425T772 | Lunarine                          | 436.22012  | 518.474 | 437.2315 | 9.30846 | 4                      | C10603 | [M-H] <sup>-</sup>     | MoNA      | 0.99949 | neg | 1 | 3481491.06 |
| _2                   | Lupenone                          | 425.376487 | 772.206 | 424.3705 | 1.91185 | C30H48O                | C16990 | [M+H] <sup>+</sup>     | OTCML     | 0.99035 | pos | 1 | 100304923  |
| M409T636             | Lupeol                            | 409.383343 | 636.473 | 426.3862 | 11.1793 | C30H50O                | C08628 | [M+H-H2O] <sup>+</sup> | mzCloud   | 5.7E-05 | pos | 2 | 41075050.6 |
| M170T388             | Lupinine                          | 170.153689 | 387.763 | 169.1467 | 1.23824 | C10H19NO               | C10773 | [M+H] <sup>+</sup>     | BioDeepDB | 0.98845 | pos | 1 | 19073973.6 |
| M413T835             | Lupulone                          | 413.267768 | 835.329 | 414.277  | 4.73335 | C26H38O4               | C10706 | [M-H] <sup>-</sup>     | MoNA      | 0.62324 | neg | 1 | 643458.968 |
| M441T158             | Lusitanicoside                    | 441.17879  | 158.1   | 442.1839 | 4.90994 | C21H30O10              | C10474 | [M-H] <sup>-</sup>     | mzCloud   | 0.66886 | neg | 1 | 700345.873 |
| M551T649             | Lutein                            | 551.406407 | 649.338 | 568.428  | 25.6784 | C40H56O2               | C08601 | [M+H-H2O] <sup>+</sup> | BioDeepDB | 4.2E-06 | pos | 2 | 17713747.6 |
| M285T447             | Luteolin                          | 285.169106 | 446.967 | 286.0477 | 2.16819 | C15H10O6               | C01514 | [M-H] <sup>-</sup>     | BioDeepDB | 0.00038 | neg | 2 | 2641710.45 |
| M448T323<br>M666T152 | Luteolin 7-O-<br>beta-D-glucoside | 448.109872 | 322.536 | 448.1006 | 20.6918 | C21H20O11              | C03951 | [M] <sup>+</sup>       | mzCloud   | 0.83149 | pos | 1 | 3976863.61 |
| _1                   | Lychnose                          | 666.229966 | 152.375 | 666.2219 | 12.1077 | C24H42O21              | C08242 | [M] <sup>+</sup>       | MetaDNA   | 0.01026 | pos | 2 | 23204755.1 |
| M270T180             | Lycorine                          | 270.107377 | 179.75  | 287.1158 | 3.50562 | C16H17N04              | C08532 | [M+H-H2O] <sup>+</sup> | OTCML     | 0.67474 | pos | 1 | 12907256.4 |
| M306T425             | Lysergic acid<br>diethylamide     | 306.191726 | 424.572 | 323.1998 | 2.08934 | C20H25N3O              | C07542 | [M+H-H2O] <sup>+</sup> | MoNA      | 0.99081 | pos | 1 | 2596976.71 |
| M409T820             | LysoPA (16:0/0:0)                 | 409.234059 | 820.294 | 410.2433 | 4.80135 | C19H39O7P<br>C10H13C1N | C04036 | [M-H] <sup>-</sup>     | BioDeepDB | 0.63507 | neg | 1 | 18652646.4 |
| M179T731             | Chlorophenylpipe                  | 179.069705 | 731.347 | 196.0767 | 2.45254 | 2                      | C11738 | [M+H-H2O] <sup>+</sup> | mzCloud   | 0.60666 | pos | 1 | 12147111   |

|           |                      |            |         |          |         |                     |        |                        |           |         |     |   |            |
|-----------|----------------------|------------|---------|----------|---------|---------------------|--------|------------------------|-----------|---------|-----|---|------------|
| M165T465  | m-Coumaric acid      | 165.05326  | 464.668 | 164.0473 | 7.97356 | C9H8O3              | C12621 | [M+H] <sup>+</sup>     | BioDeepDB | 0.65465 | pos | 1 | 8387486.75 |
| M109T37   | m-Cresol             | 109.064534 | 37.1891 | 108.0575 | 2.21606 | C7H8O               | C01467 | [M+H] <sup>+</sup>     | BioDeepDB | 1.1E-20 | pos | 2 | 3443161.81 |
| M135T829  | M-toluic Acid        | 135.043403 | 829.321 | 136.0524 | 12.7456 | C8H8O2              | C07211 | [M-H] <sup>-</sup>     | MetaDNA   | 3.1E-05 | neg | 2 | 3451283.77 |
| M107T436  | m-Xylene             | 107.085217 | 436.069 | 106.0783 | 2.63959 | C8H10<br>C2OH24NO4  | C07208 | [M+H] <sup>+</sup>     | BioDeepDB | 0.62405 | pos | 1 | 16691618   |
| M343T463  | Magnoflorine         | 343.170548 | 463.271 | 342.1705 | 21.1583 | +                   | C09581 | [M+H] <sup>+</sup>     | OTCML     | 0.99864 | pos | 1 | 37983789.2 |
| M266T423  | Magnolol             | 266.133373 | 423.199 | 266.1307 | 10.0428 | C18H18O2            | C10651 | [M] <sup>+</sup>       | mzCloud   | 0.73221 | pos | 1 | 8325623.41 |
| M133T261  | Malate               | 133.013347 | 261.138 | 134.0215 | 6.59076 | C4H6O5<br>C1OH1906P | C00711 | [M-H] <sup>-</sup>     | mzCloud   | 0.75967 | neg | 1 | 8009644.09 |
| M331T126  | Malathion            | 331.049669 | 125.598 | 330.0361 | 19.0082 | S2                  | C07497 | [M+H] <sup>+</sup>     | BioDeepDB | 0.83419 | pos | 1 | 1684443.7  |
| M115T59   | Maleamate            | 115.027829 | 58.6151 | 115.0269 | 8.07734 | C4H5NO3             | C01596 | [M] <sup>+</sup>       | MetaDNA   | 0.03344 | pos | 2 | 1723987.69 |
| M99T78_1  | Maleic acid          | 98.5118283 | 78.3841 | 116.011  | 6.44123 | C4H4O4              | C01384 | [M+H-H2O] <sup>+</sup> | BioDeepDB | 2.3E-08 | pos | 2 | 55047741.4 |
| M98T38    | Maleimide            | 97.9918154 | 38.3208 | 97.0164  | 0.87455 | C4H3NO2             | C07272 | [M+H] <sup>+</sup>     | BioDeepDB | 0.60787 | pos | 1 | 308763163  |
| M103T81_1 | Malonate             | 103.001658 | 80.6174 | 104.011  | 7.82953 | C3H4O4              | C00383 | [M-H] <sup>-</sup>     | BioDeepDB | 1E-17   | neg | 2 | 166803751  |
| M281T764  | Malonoben            | 281.167956 | 764.034 | 282.1732 | 7.22861 | C18H22N2O           | C19039 | [M-H] <sup>-</sup>     | BioDeepDB | 0.70366 | neg | 1 | 566578.566 |
| M990T290  | Maltohexaose         | 990.328321 | 289.912 | 990.3275 | 0.82952 | C36H62O31           | C01936 | [M] <sup>+</sup>       | BioDeepDB | 0.62858 | pos | 1 | 5524035.28 |
| M127T685  | Maltol               | 127.039603 | 684.985 | 126.0317 | 4.93316 | C6H6O3              | C11918 | [M+H] <sup>+</sup>     | MoNA      | 3.9E-06 | pos | 2 | 344805416  |
| M666T180  | Maltotetraose        | 666.248546 | 179.75  | 666.2219 | 4.96372 | C24H42O21           | C02052 | [M] <sup>+</sup>       | BioDeepDB | 1.1E-05 | pos | 2 | 32884088.8 |
| M487T143  | Maltotriose          | 487.16343  | 142.85  | 504.169  | 3.82695 | C18H32O16           | C01835 | [M+H-H2O] <sup>+</sup> | mzCloud   | 0.616   | pos | 1 | 42497910.2 |
| M325T685  | Maltulose            | 325.113652 | 684.985 | 342.1162 | 15.028  | C12H22O11           | C19633 | [M+H-H2O] <sup>+</sup> | MetaDNA   | 0.00993 | pos | 2 | 17019869.5 |
| M491T713  | Malvidin 3-glucoside | 491.115916 | 713.292 | 493.1346 | 7.29778 | C23H25O12           | C12140 | [M-H] <sup>-</sup>     | BioDeepDB | 0.74609 | neg | 1 | 8060883.98 |

|                            |                              |            |         |          |         |                        |        |                                                        |           |             |   |            |
|----------------------------|------------------------------|------------|---------|----------|---------|------------------------|--------|--------------------------------------------------------|-----------|-------------|---|------------|
| M153T67                    | Mandelic acid                | 153.090516 | 66.9841 | 152.0473 | 4.09354 | C8H8O3                 | C01984 | [M+H] <sup>+</sup>                                     | BioDeepDB | 8.2E-05 pos | 2 | 7430504.8  |
| M133T129                   | Mandelonitrile               | 133.0499   | 129.234 | 133.0528 | 21.7979 | C8H7NO<br>C23H22ClN    | C00561 | [M] <sup>+</sup>                                       | MetaDNA   | 0.09256 pos | 2 | 63968799.5 |
| M412T381                   | Mandipropamid                | 412.123255 | 380.63  | 411.1237 | 18.735  | 04                     | C18522 | [M+H] <sup>+</sup>                                     | BioDeepDB | 1 pos       | 1 | 3506535.58 |
| M422T753                   | Mangiferin                   | 422.078155 | 753.315 | 422.0849 | 15.9797 | C19H18O11              | C10077 | [M] <sup>-</sup>                                       | MoNA      | 0.09046 neg | 2 | 5518752.08 |
| M182T91                    | Mannitol                     | 182.073873 | 90.9026 | 182.079  | 0.27938 | C6H14O6                | C00392 | [M] <sup>-</sup>                                       | BioDeepDB | 1E-25 neg   | 2 | 102430799  |
| M263T316                   | Mannitol 1-phosphate         | 263.059065 | 315.701 | 262.0454 | 24.2862 | C6H15O9P               | C00644 | [M+H] <sup>+</sup>                                     | MoNA      | 0.8819 pos  | 1 | 4021152.57 |
| M247T657                   | Marmesin                     | 247.095398 | 657.451 | 246.0892 | 4.36274 | C14H14O4               | C09276 | [M+H] <sup>+</sup>                                     | GNPS      | 0.75962 pos | 1 | 3997217.5  |
| M472T713                   | Maslinic acid                | 472.354784 | 713.464 | 472.3553 | 1.09278 | C30H48O4               | C16939 | [M] <sup>+</sup>                                       | BioDeepDB | 0.63 pos    | 1 | 1484310.74 |
| M283T416                   | Masoprocol                   | 283.128852 | 416.128 | 302.1518 | 16.099  | C18H22O4               | C10719 | [M-H2O-H] <sup>-</sup>                                 | MoNA      | 0.99116 neg | 1 | 779160.914 |
| M341T663                   | Matairesinol                 | 341.137835 | 663.287 | 358.1416 | 10.7544 | C20H22O6               | C10682 | [M+H-H2O] <sup>+</sup>                                 | mzCloud   | 4.2E-05 pos | 2 | 13469630.1 |
| M247T777<br>M231T164<br>_2 | Matricarin                   | 247.131796 | 777.245 | 246.1256 | 4.34564 | C15H18O3               | C09394 | [M+H] <sup>+</sup>                                     | MoNA      | 0.66339 pos | 1 | 3022317.18 |
|                            | Matrine                      | 231.180953 | 163.846 | 248.1889 | 2.06098 | C15H24N2O<br>C34H46ClN | C10774 | [M+H-H2O] <sup>+</sup><br>[M-<br>H2O+NH4] <sup>+</sup> | OTCML     | 0.64255 pos | 1 | 5001024.2  |
| M691T641                   | Maytansine                   | 691.307275 | 640.717 | 691.2872 | 1.08359 | 3010                   | C10606 | [M+H] <sup>+</sup>                                     | BioDeepDB | 0.98798 pos | 1 | 672069.263 |
| M199T185                   | MCPA                         | 199.017992 | 185.252 | 200.024  | 6.26119 | C9H9ClO3<br>C16H13N3O  | C18528 | [M-H] <sup>-</sup>                                     | MoNA      | 0.99778 neg | 1 | 2432251.56 |
| M294T83                    | Mebendazole                  | 294.085794 | 82.8986 | 295.0957 | 8.86006 | 3<br>C10H20NO5         | C07110 | [M-H] <sup>-</sup>                                     | BioDeepDB | 0.99935 neg | 1 | 137019795  |
| M329T317                   | Mecarbam                     | 329.047986 | 316.709 | 329.0521 | 12.5014 | PS2<br>C25H27ClN       | C18661 | [M] <sup>-</sup>                                       | BioDeepDB | 0.76949 neg | 1 | 1601428.11 |
| M390T708                   | Meclizine                    | 390.189694 | 707.557 | 390.1863 | 8.69708 | 2                      | C07116 | [M] <sup>+</sup>                                       | MoNA      | 0.76586 pos | 1 | 16188061.5 |
| M269T680                   | Medicarpin                   | 269.083404 | 679.873 | 270.0892 | 4.47622 | C16H14O4               | C10503 | Unknown                                                | OTCML     | 0.03041 neg | 2 | 1372229.05 |
| M517T104                   | Medicarpin 3-O-glucoside-6'- | 517.138658 | 104.493 | 518.1424 | 6.78334 | C25H26O12              | C16224 | [M-H] <sup>-</sup>                                     | MoNA      | 0.99822 neg | 1 | 16429290.1 |

|                      |                                           |            |         |          |         |                        |        |                        |           |         |     |   |            |
|----------------------|-------------------------------------------|------------|---------|----------|---------|------------------------|--------|------------------------|-----------|---------|-----|---|------------|
| M241T426             | Mefenamic acid                            | 241.106178 | 425.909 | 241.1103 | 17.0981 | C15H15NO2<br>C17H16F6N | C02168 | [M] <sup>+</sup>       | MoNA      | 0.99165 | pos | 1 | 5063413.39 |
| M378T90              | Mefloquine                                | 378.114833 | 89.6999 | 378.1167 | 4.89001 | 20                     | C07633 | [M] <sup>+</sup>       | mzCloud   | 0.67756 | pos | 1 | 14561292.3 |
| M194T472             | MeIQx                                     | 194.080893 | 471.768 | 213.1014 | 10.9096 | C11H11N5               | C19255 | [M-H20-H] <sup>-</sup> | MoNA      | 0.95287 | neg | 1 | 2537722.78 |
| M125T300             | Melamine                                  | 125.059175 | 300.176 | 126.0654 | 8.40311 | C3H6N6<br>C13H16N2O    | C08737 | [M-H] <sup>-</sup>     | MoNA      | 0.83307 | neg | 1 | 827061.158 |
| M232T485<br>M505T107 | Melatonin                                 | 232.117272 | 485.471 | 232.1212 | 16.8273 | 2                      | C01598 | [M] <sup>+</sup>       | mzCloud   | 0.96406 | pos | 1 | 18145079.7 |
| _1                   | Melezitose                                | 505.188189 | 106.513 | 504.169  | 23.5808 | C18H32O16              | C08243 | [M+H] <sup>+</sup>     | mzCloud   | 0.79116 | pos | 1 | 75182673.4 |
| M341T83              | Melibiose                                 | 341.105982 | 82.8986 | 342.1162 | 5.36342 | C12H22O11<br>C14H13N3O | C05400 | [M-H] <sup>-</sup>     | BioDeepDB | 1.5E-07 | neg | 2 | 13501264.4 |
| M351T611             | Meloxicam                                 | 351.038746 | 610.742 | 351.0347 | 11.5247 | 4S2<br>C13H18C12       | C08169 | [M] <sup>-</sup>       | BioDeepDB | 0.87289 | neg | 1 | 2025195.02 |
| M305T429             | Melphalan                                 | 305.082124 | 428.735 | 304.0745 | 1.06361 | N2O2                   | C07122 | [M+H] <sup>+</sup>     | BioDeepDB | 0.88646 | pos | 1 | 1111154.09 |
| M155T635             | Menthol                                   | 155.142717 | 635.37  | 156.1514 | 9.06868 | C10H20O                | C00400 | [M-H] <sup>-</sup>     | MoNA      | 0.8292  | neg | 1 | 860504.647 |
| M230T321             | Meperidine                                | 230.149243 | 321.198 | 247.1572 | 2.27408 | C15H21NO2              | C07128 | [M+H-H20] <sup>+</sup> | mzCloud   | 0.76161 | pos | 1 | 10483297.7 |
| M163T582             | Mephentermine                             | 163.132057 | 581.625 | 163.1361 | 24.7835 | C11H17N                | C07889 | [M] <sup>+</sup>       | BioDeepDB | 0.96788 | pos | 1 | 27643853.3 |
| M247T351             | Mepivacaine                               | 247.180172 | 351.348 | 246.1732 | 1.23037 | C15H22N2O              | C07528 | [M+H] <sup>+</sup>     | MoNA      | 0.67362 | pos | 1 | 4592198.17 |
| M129T666             | Mesaconate<br>meso-2,6-                   | 129.017444 | 666.058 | 130.0266 | 14.5732 | C5H6O4                 | C01732 | [M-H] <sup>-</sup>     | mzCloud   | 0.98829 | neg | 1 | 7563018.78 |
| M171T37<br>M592T635  | Diaminoheptanedi<br>Mesobilirubinoge<br>n | 171.075905 | 37.4486 | 190.0954 | 6.45968 | C7H14N2O4<br>C33H44N4O | C00680 | [M-H20-H] <sup>-</sup> | BioDeepDB | 0.99796 | neg | 1 | 248203.418 |
| _5                   |                                           | 592.314958 | 635.37  | 592.3261 | 18.8103 | 6<br>C21H26N2O         | C05790 | [M] <sup>-</sup>       | MoNA      | 0.91271 | neg | 1 | 2052789.34 |
| M386T317             | Mesoridazine                              | 386.150819 | 317.199 | 386.1487 | 5.48725 | S2                     | C07143 | [M] <sup>+</sup>       | mzCloud   | 0.71932 | pos | 1 | 15831189.6 |
| M293T655             | Mestranol                                 | 293.18927  | 654.542 | 310.1933 | 11.6099 | C21H26O2               | C07618 | [M+H-H20] <sup>+</sup> | GNPS      | 0.83963 | pos | 1 | 2532674    |
| M280T557             | Metalaxyl                                 | 280.154763 | 556.816 | 279.1471 | 1.38002 | C15H21NO4              | C10947 | [M+H] <sup>+</sup>     | mzCloud   | 0.62076 | pos | 1 | 2372497.67 |

|          |                   |            |         |          |         |                        |        |            |           |         |     |   |            |
|----------|-------------------|------------|---------|----------|---------|------------------------|--------|------------|-----------|---------|-----|---|------------|
| M201T347 | Metamitron        | 201.07616  | 347.166 | 202.0855 | 10.0709 | C10H10N4O              | C10930 | [M-H]-     | MoNA      | 0.99967 | neg | 1 | 1751598.6  |
| M180T323 | Metanephrine      | 180.102533 | 322.536 | 197.1052 | 26.4699 | C10H15N03              | C05588 | [M+H2O]+   | BioDeepDB | 5.6E-06 | pos | 2 | 121646306  |
| M150T323 | Metaraminol       | 150.090344 | 322.536 | 167.0946 | 21.1755 | C9H13N02               | C07146 | [M+H2O]+   | BioDeepDB | 2.2E-07 | pos | 2 | 69241744.9 |
| M220T379 | Metaxalone        | 220.096682 | 379.066 | 221.1052 | 5.53234 | C12H15N03<br>C17H22C1N | C07934 | [M-H]-     | BioDeepDB | 0.95258 | neg | 1 | 1257804.71 |
| M300T554 | Metconazole       | 300.128619 | 554.027 | 319.1451 | 6.3619  | 30                     | C18476 | [M-H2O-H]- | BioDeepDB | 0.99788 | neg | 1 | 728233.683 |
| M220T85  | Methabenzthiazur  | 220.053185 | 85.0169 | 221.0623 | 8.24946 | C10H11N3O              | C10909 | [M-H]-     | BioDeepDB | 0.99911 | neg | 1 | 3429968.15 |
| M160T106 | on                |            |         |          |         |                        |        |            |           |         |     |   |            |
| _2       | Methacholine      | 160.132545 | 105.503 | 160.1338 | 7.83444 | C8H18N02               | C07471 | [M]+       | mzCloud   | 0.81031 | pos | 1 | 12535411.5 |
| M310T807 | Methadone         | 310.211666 | 807.232 | 309.2093 | 15.5843 | C21H27N0               | C07163 | [M+H]+     | BioDeepDB | 0.75    | pos | 1 | 4293508.28 |
| M251T685 | Methaqualone      | 251.124143 | 684.985 | 250.1106 | 24.8587 | C16H14N2O<br>C5H8N4O3S | C07560 | [M+H]+     | BioDeepDB | 2.3E-05 | pos | 2 | 17931104.6 |
| M237T750 | Methazolamide     | 237.018043 | 749.96  | 236.0038 | 29.2941 | 2                      | C07764 | [M+H]+     | BioDeepDB | 0.99969 | pos | 1 | 48761305.6 |
| M114T309 | Methimazole       | 114.026369 | 308.967 | 114.0252 | 10.2515 | C4H6N2S                | C07190 | [M]+       | BioDeepDB | 0.67733 | pos | 1 | 2210345.23 |
| M181T51  | Methionine        | 181.121825 | 51.1942 | 180.0569 | 29.2405 | C5H12N2O3<br>S         | C03510 | [M+H]+     | BioDeepDB | 0.34533 | pos | 2 | 15401951.8 |
| M245T541 | Methofoximine     | 245.126375 | 541.275 | 262.1317 | 8.60417 | 3                      | C07844 | [M+H2O]+   | MoNA      | 0.89466 | pos | 1 | 43547940.7 |
| M145T358 |                   |            |         |          |         | C5H10N2O2<br>S         |        |            |           |         |     |   |            |
| _2       | Methomyl          | 145.037611 | 357.958 | 162.0463 | 8.65575 | S                      | C11196 | [M+H2O]+   | MoNA      | 0.76498 | pos | 1 | 3824593.24 |
| M254T507 | Methoprotryne     | 254.137526 | 507.343 | 271.1467 | 6.84571 | C11H21N5O<br>C20H22N8O | C19104 | [M+H2O]+   | BioDeepDB | 0.99827 | pos | 1 | 6986558.51 |
| M455T799 | Methotrexate      | 455.18627  | 799.089 | 454.1713 | 16.869  | 5                      | C01937 | [M+H]+     | MoNA      | 3.4E-06 | pos | 2 | 71544417.3 |
| M328T128 | Methotrimeprazine | 328.160092 | 127.944 | 328.1609 | 2.46309 | S                      | C07192 | [M]+       | BioDeepDB | 0.66994 | pos | 1 | 20475482.7 |
| M212T104 |                   |            |         |          |         | C19H24N2O<br>S         |        |            |           |         |     |   |            |
| _3       | Methoxamine       | 212.127448 | 104.493 | 211.1208 | 2.96202 | C11H17N03              | C07513 | [M+H]+     | BioDeepDB | 0.69364 | pos | 1 | 4352256.2  |
| M197T723 | Methoxsalen       | 197.022883 | 722.604 | 216.0423 | 5.21074 | C12H8O4                | C01864 | [M-H2O-H]- | MoNA      | 0.71594 | neg | 1 | 2099894.81 |



| C22H28N2O |                                               |            |            |          |          |                        |        |            |           |             |             |            |            |
|-----------|-----------------------------------------------|------------|------------|----------|----------|------------------------|--------|------------|-----------|-------------|-------------|------------|------------|
| M367T626  | Methoxyfenozide<br>Methyl (indol-3-yl)acetate | 367.20551  | 626.183    | 368.21   | 7.58784  | 3                      | C18525 | [M-H]-     | mzCloud   | 0.80688 neg | 1           | 9833449.61 |            |
| M190T762  | Methyl 2-hydroxybenzoate                      | 190.086013 | 762.439    | 189.079  | 1.38236  | C11H11N02              | C20635 | [M+H]+     | mzCloud   | 0.65176 pos | 1           | 2327650.33 |            |
| M151T658  | Methyl beta-D-galactoside                     | 151.038255 | 658.372    | 152.0473 | 11.7132  | C8H8O3                 | C12305 | [M-H]-     | MoNA      | 0.78445 neg | 1           | 7291405.06 |            |
| M194T816  | Methyl cinnamate                              | 194.080996 | 815.664    | 194.079  | 3.14728  | C7H14O6                | C03619 | [M]-       | BioDeepDB | 5E-05 neg   | 2           | 24980057.1 |            |
| M163T836  | Methyl jasmonate                              | 163.074881 | 836.034    | 162.0681 | 3.03535  | C10H10O2               | C06358 | [M+H]+     | mzCloud   | 5.9E-13 pos | 2           | 14522158.9 |            |
| M224T739  | Methyl ergonovine                             | 224.01018  | 738.697    | 224.1412 | 3.86942  | C13H20O3               | C11512 | [M]+       | BioDeepDB | 0.01807 pos | 2           | 38059353.4 |            |
| M211T810  | Methyl dopa                                   | 211.132889 | 809.797    | 211.0845 | 1.9729   | C10H13N04<br>C20H25N3O | C07194 | [M]-       | BioDeepDB | 7E-05 neg   | 2           | 2301137.85 |            |
| M322T284  | Methyl eugenol                                | 322.185085 | 284.377    | 339.1947 | 6.69718  | 2                      | C07800 | [M+H2O]+   | BioDeepDB | 0.99816 pos | 1           | 8309894.94 |            |
| M179T803  | Methylimidazoleacetic acid                    | 179.106176 | 802.88     | 178.0994 | 2.79203  | C11H14O2               | C10454 | [M+H]+     | BioDeepDB | 0.62833 pos | 1           | 7120581.3  |            |
| M141T132  | Methyllycaconitine                            | 141.065443 | 131.949    | 140.0586 | 3.0673   | C6H8N2O2<br>C37H50N2O  | C05828 | [M+H]+     | mzCloud   | 0.62582 pos | 1           | 4646859.29 |            |
| M683T670  | Methylmalonic acid                            | 683.373264 | 670.166    | 682.3465 | 28.4496  | 10                     | C08699 | [M+H]+     | MoNA      | 1 pos       | 1           | 3705025.19 |            |
| M117T835  | Methylphenidate                               | 117.023401 | 116.926659 | 835.329  | 118.0266 | 5.48591                | C4H6O4 | C02170     | [M-H]-    | BioDeepDB   | 1.3E-22 neg | 2          | 66056459.5 |
| M234T512  | Methylsuccinic acid                           | 234.147875 | 511.77     | 233.1416 | 4.27303  | C14H19N02              | C07196 | [M+H]+     | mzCloud   | 0.62287 pos | 1           | 3641702.39 |            |
| M113T276  | Methylthiouracil                              | 113.023401 | 275.643    | 132.0423 | 4.14215  | C5H8O4                 | C08645 | [M-H2O-H]- | mzCloud   | 0.70529 neg | 1           | 13146251.6 |            |
| M142T106  | Methylsergide                                 | 142.021172 | 105.537    | 142.0201 | 7.54939  | C5H6N2O5<br>C21H27N3O  | C19265 | [M]-       | BioDeepDB | 0.99874 neg | 1           | 2306630.48 |            |
| M353T565  | Metobromuron                                  | 353.213217 | 564.534    | 353.2103 | 8.2582   | 2<br>C9H11BrN2         | C07199 | [M]+       | BioDeepDB | 0.87507 pos | 1           | 235045129  |            |
| M241T131  | Metoclopramide                                | 240.989676 | 130.668    | 258.0004 | 13.6504  | 02<br>C14H22C1N        | C18793 | [M+H2O]+   | MoNA      | 0.99998 pos | 1           | 3494484.48 |            |
| M282T608  | metolachloor                                  | 282.132971 | 608.261    | 299.1401 | 1.07938  | 302<br>C15H22C1N       | C07868 | [M+H2O]+   | mzCloud   | 0.59435 pos | 1           | 1795303.58 |            |
| M284T345  |                                               | 284.144831 | 344.555    | 283.1339 | 12.8412  | 02                     | C10953 | [M+H]+     | MoNA      | 0.99995 pos | 1           | 38469386.1 |            |

|                            |                            |                          |                    |                      |                    |                                              |                  |                                           |                   |                    |            |        |                          |
|----------------------------|----------------------------|--------------------------|--------------------|----------------------|--------------------|----------------------------------------------|------------------|-------------------------------------------|-------------------|--------------------|------------|--------|--------------------------|
| M250T777<br>M417T163<br>_1 | Metoprolol<br>Metosulam    | 250.176772<br>417.012817 | 777.245<br>162.728 | 267.1834<br>417.0065 | 3.22315<br>15.1483 | C15H25N03<br>C14H13C12<br>N5O4S<br>C10H13C1N | C07202<br>C18867 | [M+H-20] <sup>+</sup><br>[M] <sup>+</sup> | MoNA<br>MoNA      | 0.65192<br>0.99999 | pos<br>pos | 1<br>1 | 13211377.7<br>4230970.68 |
| M228T632<br>M171T63<br>_1  | Metoxuron<br>Metronidazole | 228.06478<br>171.064549  | 632.288<br>63.4448 | 228.0666<br>171.0644 | 7.97892<br>0.87225 | 202<br>C6H9N3O3<br>C12H18N2O                 | C11011<br>C07203 | [M] <sup>-</sup><br>[M] <sup>+</sup>      | MoNA<br>mzCloud   | 0.99898<br>0.60038 | neg<br>pos | 1<br>1 | 1105981.08<br>2087489.1  |
| M222T158                   | Mexacarbate                | 222.132903               | 157.773            | 222.1368             | 17.5419            | 2                                            | C18952           | [M] <sup>+</sup>                          | BioDeepDB         | 1                  | pos        | 1      | 5894779.36               |
| M180T513                   | Mexiletine                 | 180.137871               | 513.285            | 179.131              | 2.2476             | C11H17N0<br>C29H38FN3                        | C07220           | [M+H] <sup>+</sup>                        | MoNA              | 0.84575            | pos        | 1      | 2085250.6                |
| M478T32                    | Mibefradil                 | 478.285658               | 32.4171            | 495.2897             | 7.09155            | 03                                           | C07222           | [M+H-20] <sup>+</sup>                     | BioDeepDB         | 0.99845            | pos        | 1      | 4126379.13               |
| M249T791                   | Micheliolide               | 249.148421               | 790.802            | 248.1412             | 0.39633            | C15H2003<br>C18H13C1F                        | C09507           | [M+H] <sup>+</sup>                        | OTCML             | 0.31273            | pos        | 2      | 54074413.3               |
| M325T320                   | Midazolam                  | 325.077138               | 319.758            | 325.0782             | 3.26759            | N3<br>C12H18N2O                              | C07524           | [M] <sup>+</sup>                          | mzCloud           | 0.71862            | pos        | 1      | 8772769.93               |
| M253T288                   | Midodrine                  | 253.118366               | 287.981            | 254.1267             | 4.17816            | 4                                            | C07890           | [M-H] <sup>-</sup>                        | BioDeepDB         | 0.66101            | neg        | 1      | 828142.465               |
| M428T384                   | Mifepristone               | 428.257653               | 383.727            | 429.2668             | 4.31239            | C29H35N02                                    | C07652           | [M-H] <sup>-</sup>                        | BioDeepDB         | 0.94096            | neg        | 1      | 1212869.26               |
| M208T90                    | Miglitol                   | 208.116843               | 89.6999            | 207.1107             | 5.31244            | C8H17N05                                     | C07708           | [M+H] <sup>+</sup>                        | MoNA              | 0.03821            | pos        | 2      | 117256526                |
| M210T85                    | Milrinone                  | 210.068919               | 85.0169            | 211.0746             | 7.22942            | C12H9N3O<br>C23H27N3O                        | C07224           | Unknown                                   | OTCML             | 0.65661            | neg        | 1      | 3865905.82               |
| M457T668<br>M192T107<br>_2 | Minocycline<br>Minoxidil   | 457.18595<br>192.12237   | 667.609<br>106.513 | 457.1849<br>209.1277 | 2.29727<br>11.1576 | 7<br>C9H15N5O                                | C07225<br>C07226 | [M] <sup>+</sup><br>[M+H-20] <sup>+</sup> | MoNA<br>BioDeepDB | 0.72807<br>0.99984 | pos<br>pos | 1<br>1 | 7971418.75<br>4578487.26 |
| M266T697                   | Mirtazapine                | 266.171689               | 696.575            | 265.1579             | 24.4693            | C17H19N3<br>C15H18N4O                        | C07570           | [M+H] <sup>+</sup>                        | MoNA              | 0.00547            | pos        | 2      | 53289675                 |
| M334T573                   | Mitomycin                  | 334.126644               | 573.072            | 334.1277             | 3.16017            | 5<br>C22H28N4O                               | C06681           | [M] <sup>+</sup>                          | BioDeepDB         | 0.81256            | pos        | 1      | 1969958.04               |
| M427T706                   | Mitoxantrone               | 427.194082               | 706.229            | 444.2009             | 1.44174            | 6<br>C23H30N2O                               | C11195           | [M+H-20] <sup>+</sup>                     | BioDeepDB         | 0.68808            | pos        | 1      | 3720527.71               |
| M398T810                   | Mitragynine                | 398.220315               | 809.797            | 398.2206             | 0.71488            | 4                                            | C09226           | [M] <sup>-</sup>                          | BioDeepDB         | 0.60315            | neg        | 1      | 1675654.49               |



|          |                                    |            |         |          |         |                        |        |                                     |           |         |     |   |            |
|----------|------------------------------------|------------|---------|----------|---------|------------------------|--------|-------------------------------------|-----------|---------|-----|---|------------|
| M163T95  | myo-Inositol                       | 163.059171 | 94.7467 | 180.0634 | 19.656  | C6H12O6                | C00137 | [M+H <sub>2</sub> O] <sup>+</sup>   | MetaDNA   | 0.00164 | pos | 2 | 729970238  |
| M301T425 | Myricetin                          | 301.026701 | 424.572 | 318.0376 | 11.5095 | C15H10O8               | C10107 | [M+H <sub>2</sub> O] <sup>+</sup>   | mzCloud   | 0.7279  | pos | 1 | 3284150.12 |
| M464T508 | Myricitrin                         | 464.087303 | 507.55  | 464.0955 | 17.6114 | C21H20O12              | C10108 | [M] <sup>-</sup>                    | mzCloud   | 0.74212 | neg | 1 | 1429269.81 |
| M228T36  | Myristic acid                      | 227.980012 | 35.8675 | 228.2089 | 8.96224 | C14H28O2               | C06424 | [M] <sup>+</sup>                    | BioDeepDB | 0.03169 | pos | 2 | 55921104.9 |
| M193T779 | Myristicin                         | 193.085551 | 778.543 | 192.0786 | 1.68309 | C11H12O3               | C10480 | [M+H] <sup>+</sup>                  | GNPS      | 0.63536 | pos | 1 | 17656782.5 |
| M227T832 | Myristoleic acid                   | 227.199544 | 831.709 | 226.1933 | 4.54102 | C14H26O2               | C08322 | [M+H] <sup>+</sup>                  | BioDeepDB | 0.62406 | pos | 1 | 2991679.21 |
| M241T228 | Oxoocentanoyl)homo<br>N-Acetyl-a-  | 241.128859 | 227.633 | 241.1314 | 10.5396 | C12H19NO4              | C11841 | [M] <sup>+</sup>                    | BioDeepDB | 0.99976 | pos | 1 | 146537939  |
| M309T249 | neuraminic acid<br>N-Acetyl-alpha- | 309.105741 | 248.622 | 309.106  | 0.83683 | C11H19NO9              | C19909 | [M] <sup>-</sup>                    | BioDeepDB | 0.59892 | neg | 1 | 573694.965 |
| M204T632 | D-glucosamine<br>N-Acetyl-alpha-   | 204.084938 | 631.982 | 221.0899 | 12.111  | C8H15NO6               | C20328 | [M+H <sub>2</sub> O] <sup>+</sup>   | mzCloud   | 0.91158 | pos | 1 | 22961146   |
| M301T234 | D-glucosamine 1-<br>N-Acetyl-b-    | 301.055619 | 233.519 | 301.0563 | 2.15459 | C8H16NO9P              | C04501 | [M] <sup>-</sup>                    | mzCloud   | 0.72463 | neg | 1 | 730320.222 |
| M220T392 | glucosaminylamin<br>N-Acetyl-beta- | 220.107174 | 391.678 | 220.1059 | 5.78745 | C8H16N2O5              | C01239 | [M] <sup>+</sup>                    | MoNA      | 0.69856 | pos | 1 | 12376714.9 |
| M132T225 | alanine<br>N-Acetyl-D-             | 132.064989 | 224.729 | 131.0582 | 1.8353  | C5H9NO3                | C01073 | [M+H] <sup>+</sup>                  | BioDeepDB | 0.59239 | pos | 1 | 68904118.8 |
| M204T229 | galactosamine<br>N-Acetyl-D-       | 204.086082 | 229.059 | 221.0899 | 17.7177 | C8H15NO6               | C01132 | [M+H <sub>2</sub> O] <sup>+</sup>   | mzCloud   | 0.03591 | pos | 2 | 61229879.8 |
| M204T143 | glucosamine<br>N-Acetyl-L-         | 204.086106 | 142.85  | 221.0899 | 17.8341 | C8H15NO6               | C00140 | [M+H <sub>2</sub> O] <sup>+</sup>   | MoNA      | 9.4E-05 | pos | 2 | 122352217  |
| M158T172 | aspartic acid<br>N-Acetyl-L-       | 158.044182 | 171.935 | 175.0481 | 22.2495 | C6H9NO5                | C01042 | [M+H <sub>2</sub> O] <sup>+</sup>   | BioDeepDB | 2.9E-05 | pos | 2 | 8606629.26 |
| M208T533 | phenylalanine<br>N-Acetyl-L-       | 208.096655 | 532.526 | 207.0895 | 0.58234 | C11H13NO3              | C03519 | [M+H] <sup>+</sup>                  | BioDeepDB | 2E-09   | pos | 2 | 16405037.8 |
| M234T787 | tyrosine<br>N-Acetyl-              | 234.105475 | 786.569 | 251.1158 | 12.3477 | C13H17NO4<br>C25H39NO6 | C01657 | [M+H <sub>2</sub> O] <sup>+</sup>   | BioDeepDB | 0.73678 | pos | 1 | 3077113    |
| M482T509 | leukotriene E4<br>N-               | 482.253984 | 508.883 | 481.2498 | 6.41156 | S                      | C11361 | [M+H] <sup>+</sup>                  | BioDeepDB | 0.89426 | pos | 1 | 3072998.7  |
| M160T483 | Acetylanthrnila                    | 160.039189 | 482.656 | 179.0582 | 3.87763 | C9H9NO3                | C06332 | [M-H <sub>2</sub> O-H] <sup>-</sup> | mzCloud   | 0.67433 | neg | 1 | 1371598.79 |

|            |                                                    |            |         |          |         |           |        |                        |           |         |     |   |            |
|------------|----------------------------------------------------|------------|---------|----------|---------|-----------|--------|------------------------|-----------|---------|-----|---|------------|
| M136T465   | N-<br>Acetyllarylamine                             | 136.076169 | 464.668 | 135.0684 | 3.52086 | C8H9NO    | C07565 | [M+H] <sup>+</sup>     | MoNA      | 0.61171 | pos | 1 | 10823836.4 |
| M303T388   | N-<br>Acetylaspartylgl<br>N-Acetylglutamic<br>acid | 303.082243 | 388.326 | 304.0907 | 3.89536 | C11H16N2O | C12270 | [M-H] <sup>-</sup>     | mzCloud   | 0.74579 | neg | 1 | 1355463.11 |
| M190T197   | N-<br>Acetylhistidine                              | 190.070262 | 196.644 | 189.0637 | 3.75876 | C7H11NO5  | C00624 | [M+H] <sup>+</sup>     | BioDeepDB | 1.9E-13 | pos | 2 | 273143473  |
| M198T164   | N-<br>Acetylhistidine                              | 198.086619 | 163.846 | 197.08   | 3.31702 | C8H11N3O3 | C02997 | [M+H] <sup>+</sup>     | BioDeepDB | 0.00066 | pos | 2 | 34905112.5 |
| M111T92_2  | N-<br>Acetylimidazole                              | 111.055036 | 91.7174 | 110.048  | 2.15744 | C5H6N2O   | C02560 | [M+H] <sup>+</sup>     | MoNA      | 0.99099 | pos | 1 | 26764154.6 |
| M366T101_2 | N-<br>Acetylglutamic<br>acid                       | 366.136492 | 101.161 | 383.1428 | 3.07646 | C14H25NO1 | C00611 | [M+H-H2O] <sup>+</sup> | mzCloud   | 0.60435 | pos | 1 | 38009510.7 |
| M172T353   | N-<br>Acetyllysine                                 | 172.097021 | 353.163 | 173.1052 | 2.14632 | C8H15NO3  | C02710 | [M-H] <sup>-</sup>     | BioDeepDB | 3E-10   | neg | 2 | 6540906.82 |
| M204T119   | N-<br>Acetylmannosamin                             | 204.086068 | 119.433 | 221.0899 | 17.6477 | C8H15NO6  | C00645 | [M+H-H2O] <sup>+</sup> | MetaDNA   | 0.00044 | pos | 2 | 135278137  |
| M293T268   | N-<br>Acetylmuramate                               | 293.111436 | 267.702 | 293.1111 | 1.14795 | C11H19NO8 | C02713 | [M] <sup>-</sup>       | MoNA      | 0.61552 | neg | 1 | 230691.115 |
| M292T147   | N-<br>Acetylneuraminat                             | 292.101373 | 146.742 | 309.106  | 9.61035 | C11H19NO9 | C00270 | [M+H-H2O] <sup>+</sup> | MetaDNA   | 0.01327 | pos | 2 | 96484115.9 |
| M175T103   | N-<br>Acetylnornithine                             | 175.106653 | 103.423 | 174.1004 | 5.83942 | C7H14N2O3 | C00437 | [M+H] <sup>+</sup>     | mzCloud   | 0.63535 | pos | 1 | 179684750  |
| M131T236   | N-<br>Acetylputrescine                             | 131.117543 | 235.734 | 130.1106 | 2.54059 | C6H14N2O  | C02714 | [M+H] <sup>+</sup>     | MoNA      | 0.60594 | pos | 1 | 3945036.95 |
| M219T378   | N-<br>Acetylserotonin                              | 219.112776 | 377.704 | 218.1055 | 0.00021 | C12H14N2O | C00978 | [M+H] <sup>+</sup>     | mzCloud   | 0.57728 | pos | 1 | 11527235.3 |
| M188T401   | N-Alpha-<br>acetyllysine                           | 188.069136 | 400.59  | 188.1161 | 8.4927  | C8H16N2O3 | C12989 | [M] <sup>+</sup>       | BioDeepDB | 0.00052 | pos | 2 | 342641704  |
| M189T811   | N-Amidino-L-<br>glutamate                          | 189.075089 | 811.413 | 189.075  | 0.46951 | C6H11N3O4 | C03140 | [M] <sup>+</sup>       | BioDeepDB | 0.986   | pos | 1 | 6687706.68 |
| M440T541   | N-<br>N-Arachidonyl<br>dopamine                    | 440.313467 | 541.275 | 439.3086 | 5.472   | C28H41NO3 | C12271 | [M+H] <sup>+</sup>     | BioDeepDB | 0.99697 | pos | 1 | 30414196.5 |
| M306T382   | N-<br>Carbobenzoxyglyc<br>N-Formyl-L-              | 306.12217  | 382.171 | 306.1216 | 1.86138 | C15H18N2O | C01632 | [M] <sup>-</sup>       | MoNA      | 0.99022 | neg | 1 | 604563.406 |
| M176T217   | N-<br>methionine                                   | 176.037047 | 216.95  | 177.046  | 2.34631 | C6H11NO3S | C03145 | [M-H] <sup>-</sup>     | BioDeepDB | 5.3E-06 | neg | 2 | 892324.437 |
| M286T99    | N-<br>Glucosylnicotina                             | 286.091487 | 98.9918 | 286.0927 | 4.24109 | C12H16NO7 | C03003 | [M] <sup>+</sup>       | MetaDNA   | 0.01692 | pos | 2 | 544962026  |

|          |                              |            |         |          |         |           |           |            |           |         |         |     |            |            |
|----------|------------------------------|------------|---------|----------|---------|-----------|-----------|------------|-----------|---------|---------|-----|------------|------------|
| M325T179 | N-<br>Glycolylneuramin       | 325.102029 | 179.046 | 325.1009 | 3.47358 | 0         | C11H19NO1 | C03410     | [M]-      | MoNA    | 0.64118 | neg | 1          | 1232403.65 |
| M213T139 | N-<br>Heptanoylhomoser       | 213.134617 | 138.719 | 213.1365 | 8.83701 | C11H19NO3 | C11844    | [M]-       | BioDeepDB | 0.99934 | neg     | 1   | 2292800.18 |            |
| M148T119 | N-Methyl-D-<br>aspartic acid | 148.107034 | 119.433 | 147.0532 | 0.35102 | C5H9NO4   | C12269    | [M+H]+     | BioDeepDB | 0.58113 | pos     | 1   | 242177479  |            |
| M144T446 | N-methyl-L-<br>glutamic Acid | 144.064855 | 445.984 | 161.0688 | 24.2181 | C6H11NO4  | C01046    | [M+H-H2O]+ | MoNA      | 0.01141 | pos     | 2   | 22869343.9 |            |
| M155T219 | N-<br>Methylethanolami       | 155.033388 | 219.233 | 155.0347 | 8.46446 | C3H10NO4P | C01210    | [M]+       | MetaDNA   | 0.00077 | pos     | 2   | 5170144.63 |            |
| M138T463 | N-<br>Methylnicotinate       | 138.055124 | 463.271 | 137.0477 | 1.06981 | C7H7NO2   | C01004    | [M+H]+     | mzCloud   | 0.59322 | pos     | 1   | 36032872.2 |            |
| M175T446 | N-<br>Methyltryptamine       | 175.123895 | 445.984 | 174.1157 | 4.4989  | C11H14N2  | C06213    | [M+H]+     | BioDeepDB | 2.9E-24 | pos     | 2   | 132281093  |            |
| M152T301 | N-Methyltyramine             | 152.106451 | 300.782 | 151.0997 | 3.44841 | C9H13NO   | C02442    | [M+H]+     | BioDeepDB | 8.4E-08 | pos     | 2   | 5459954.74 |            |
| _2       | N-Nitroso-<br>pyrrolidine    | 101.071024 | 707.557 | 100.0637 | 0.47214 | C4H8N2O   | C19285    | [M+H]+     | MoNA      | 0.71923 | pos     | 1   | 15457453.1 |            |
| M101T708 | N-<br>Nitrosomethyleth       | 89.0716699 | 675.866 | 88.0637  | 7.79011 | C3H8N2O   | C19281    | [M+H]+     | MoNA      | 0.99888 | pos     | 1   | 665058.796 |            |
| M89T676  | N-Phenyl-1-<br>naphthylamine | 220.108078 | 410.542 | 219.1048 | 18.1629 | C16H13N   | C14405    | [M+H]+     | mzCloud   | 0.99762 | pos     | 1   | 17774764.1 |            |
| M220T411 | N-Phenyl-2-<br>naphthylamine | 219.103036 | 491.373 | 219.1048 | 8.05318 | C16H13N   | C14694    | [M]+       | MoNA      | 0.9206  | pos     | 1   | 21160589.2 |            |
| M193T346 | n-Propyl gallate             | 193.049444 | 345.761 | 212.0685 | 3.45062 | C10H12O5  | C11155    | [M-H2O-H]- | mzCloud   | 0.64181 | neg     | 1   | 4252419.3  |            |
| M112T394 | N-Vinyl-2-<br>pyrrolidone    | 112.07533  | 393.934 | 111.0684 | 3.08958 | C6H9NO    | C19548    | [M+H]+     | mzCloud   | 0.65247 | pos     | 1   | 18345154   |            |
| M174T171 | N,N-<br>Diethylbenzeneac     | 174.123055 | 170.665 | 191.131  | 2.93542 | C12H17NO  | C10938    | [M+H-H2O]+ | MoNA      | 0.64213 | pos     | 1   | 3839161.74 |            |
| M137T278 | N,N-Dimethyl-<br>1,4-        | 137.106774 | 277.699 | 136.1    | 3.65859 | C8H12N2   | C04203    | [M+H]+     | BioDeepDB | 0.00028 | pos     | 2   | 3860411.03 |            |
| M121T201 | N,N-<br>Dimethylaniline      | 121.091907 | 200.766 | 121.0891 | 23.1844 | C8H11N    | C02846    | [M]+       | BioDeepDB | 0.80425 | pos     | 1   | 13218293.7 |            |
| M328T777 | N,N'-<br>Dimethylsphingos    | 328.317933 | 777.245 | 327.3137 | 9.26969 | C20H41NO2 | C13914    | [M+H]+     | BioDeepDB | 0.71387 | pos     | 1   | 18786298.9 |            |
| M117T562 | N,N'-<br>Diacetylhydrazin    | 117.069382 | 561.955 | 116.0586 | 29.7407 | C4H8N2O2  | C16622    | [M+H]+     | BioDeepDB | 0.99363 | pos     | 1   | 4843889.85 |            |

|          |                                                 |            |         |          |         |                        |                        |                                     |                                     |         |         |     |            |            |
|----------|-------------------------------------------------|------------|---------|----------|---------|------------------------|------------------------|-------------------------------------|-------------------------------------|---------|---------|-----|------------|------------|
| M233T282 | N(omega)-Nitro-L-arginine                       | 233.112412 | 281.666 | 233.1124 | 0.05323 | C7H15N5O4<br>C14H30N4O | C04337                 | [M] <sup>+</sup>                    | BioDeepDB                           | 0.98454 | pos     | 1   | 5105867    |            |
| M269T702 | Diacetylspermine                                | 269.225301 | 702.055 | 286.2369 | 15.4711 | 2                      | C03413                 | [M+H <sub>2</sub> O] <sup>+</sup>   | BioDeepDB                           | 0.83684 | pos     | 1   | 10784964   |            |
| M564T583 | N1, N5, N10-<br>_3<br>Tricoumaroyl<br>N2-gamma- | 564.255231 | 582.96  | 583.2682 | 9.60812 | 6                      | C34H37N3O<br>C10H17N3O | C18069                              | [M-H <sub>2</sub> O-H] <sup>-</sup> | MoNA    | 0.99957 | neg | 1          | 832690.844 |
| M276T98  | Glutamylglutamin<br>N4-                         | 276.117073 | 97.7824 | 275.1117 | 6.89148 | 6                      | C12H13N3O              | C05283                              | [M+H] <sup>+</sup>                  | MoNA    | 1.4E-05 | pos | 2          | 230044399  |
| M295T175 | Acetylsulfametho<br>N6-Acetyl-L-                | 295.064397 | 174.576 | 295.0627 | 5.75116 | 4S                     | C13061                 | [M] <sup>-</sup>                    | MoNA                                | 0.66758 | neg     | 1   | 3841231.48 |            |
| M189T124 | lysine<br>N6-Methyl-2' -                        | 189.122663 | 124.487 | 188.1161 | 3.77055 | C8H16N2O3<br>C11H15N5O | C02727                 | [M+H] <sup>+</sup>                  | mzCloud                             | 0.62727 | pos     | 1   | 3917503.01 |            |
| M248T301 | deoxyadenosine<br>N6, N6, N6-                   | 248.110092 | 300.782 | 265.1175 | 0.10318 | 3                      | C03795                 | [M+H-H <sub>2</sub> O] <sup>+</sup> | MoNA                                | 0.98472 | pos     | 1   | 45450284.4 |            |
| M189T719 | Trimethyl-L-<br>N7-                             | 189.16235  | 719.215 | 188.1525 | 13.6085 | C9H20N2O2<br>C11H16N5O | C03793                 | [M+H] <sup>+</sup>                  | mzCloud                             | 0.83018 | pos     | 1   | 30433493.4 |            |
| M297T191 | Methylguanosine                                 | 297.107264 | 190.962 | 298.1151 | 0.18172 | 5                      | C20674                 | [M] <sup>+</sup>                    | mzCloud                             | 0.58288 | pos     | 1   | 7258775.46 |            |
| M228T131 | Nabumetone                                      | 228.117103 | 131.207 | 228.115  | 9.08828 | C15H16O2<br>C21H22N2O  | C07237                 | [M] <sup>-</sup>                    | BioDeepDB                           | 0.99942 | neg     | 1   | 1713652.68 |            |
| M413T691 | Nafcillin                                       | 413.118391 | 691.303 | 414.1249 | 1.75247 | 5S                     | C07250                 | [M-H] <sup>-</sup>                  | MoNA                                | 0.70312 | neg     | 1   | 2618296.09 |            |
| M288T607 | Naftifine<br>Naftifine                          | 288.179595 | 606.774 | 287.1674 | 17.0706 | C21H21N<br>C21H21N.    | C08071                 | [M+H] <sup>+</sup>                  | MoNA                                | 0.92033 | pos     | 1   | 2263210.76 |            |
| M306T106 | hydrochloride                                   | 306.137212 | 105.503 | 323.1441 | 1.78502 | HCl                    | C08072                 | [M+H-H <sub>2</sub> O] <sup>+</sup> | GNPS                                | 0.99001 | pos     | 1   | 115168194  |            |
| M340T502 | Nalbuphine                                      | 340.185005 | 501.549 | 357.194  | 4.58875 | C21H27N04<br>C12H12N2O | C07251                 | [M+H-H <sub>2</sub> O] <sup>+</sup> | mzCloud                             | 0.79403 | pos     | 1   | 3810028    |            |
| M233T351 | Nalidixic acid                                  | 233.091277 | 351.348 | 232.0848 | 3.42928 | 3                      | C05079                 | [M+H] <sup>+</sup>                  | mzCloud                             | 0.6121  | pos     | 1   | 8435202.59 |            |
| M294T435 | Nalorphine                                      | 294.143183 | 434.589 | 311.1521 | 5.0403  | C19H21N03              | C11787                 | [M+H-H <sub>2</sub> O] <sup>+</sup> | mzCloud                             | 0.76331 | pos     | 1   | 7209443.5  |            |
| M342T463 | Naltrexone                                      | 342.166629 | 463.271 | 341.1627 | 9.78113 | C20H23N04<br>C26H26N2O | C07253                 | [M+H] <sup>+</sup>                  | mzCloud                             | 0.78744 | pos     | 1   | 191024697  |            |
| M414T446 | Naltrindole                                     | 414.194185 | 445.522 | 414.1943 | 0.27767 | 3                      | C18128                 | [M] <sup>-</sup>                    | MoNA                                | 0.98534 | neg     | 1   | 2397991.84 |            |
| M275T680 | Nandrolone                                      | 275.200201 | 680.402 | 274.1933 | 1.28926 | C18H26O2               | C07254                 | [M+H] <sup>+</sup>                  | MoNA                                | 1.7E-07 | pos     | 2   | 13289889.2 |            |

|          |                                     |            |         |          |         |                  |        |                                     |           |         |     |   |            |
|----------|-------------------------------------|------------|---------|----------|---------|------------------|--------|-------------------------------------|-----------|---------|-----|---|------------|
| M342T504 | Napelline                           | 342.238126 | 504.466 | 359.246  | 1.28702 | C22H33NO3        | C08700 | [M+H <sub>2</sub> O] <sup>+</sup>   | MoNA      | 0.98859 | pos | 1 | 10037960.5 |
| M230T422 | Naproxen                            | 230.099056 | 421.784 | 230.0943 | 20.6692 | C14H14O3         | C01517 | [M] <sup>+</sup>                    | MoNA      | 0.99658 | pos | 1 | 11101927.4 |
| M273T686 | Naringenin                          | 273.074872 | 686.47  | 272.0685 | 3.03184 | C15H12O5         | C00509 | [M+H] <sup>+</sup>                  | BioDeepDB | 1.4E-13 | pos | 2 | 11967215.3 |
| M435T426 | Naringenin 7-O-<br>beta-D-glucoside | 435.126172 | 425.909 | 434.1213 | 5.52555 | C21H22O10        | C09099 | [M+H] <sup>+</sup>                  | mzCloud   | 4.6E-06 | pos | 2 | 42259140.7 |
| M579T452 | Naringin                            | 579.171812 | 451.616 | 580.1792 | 0.19409 | C27H32O14        | C09789 | [M-H] <sup>-</sup>                  | BioDeepDB | 0.58956 | neg | 1 | 2427857.7  |
| M580T170 | Narirutin                           | 580.167919 | 170.049 | 580.1792 | 19.4546 | C27H32O14        | C09793 | [M] <sup>-</sup>                    | OTCML     | 0.99549 | neg | 1 | 987247.456 |
| M318T832 | Nateglinide                         | 318.204935 | 831.709 | 317.1991 | 4.5078  | C19H27NO3        | C12508 | [M+H] <sup>+</sup>                  | MoNA      | 0.62374 | pos | 1 | 39116795   |
| M252T462 | Nebularine                          | 252.085645 | 461.845 | 252.0859 | 1.0119  | C10H12N4O<br>4   | C01736 | [M] <sup>+</sup>                    | MoNA      | 0.59009 | pos | 1 | 23160197.9 |
| M452T682 | Nefazodone                          | 452.223731 | 681.885 | 469.2245 | 14.7383 | C25H32C1N<br>502 | C07256 | [M+H <sub>2</sub> O] <sup>+</sup>   | GNPS      | 0.84676 | pos | 1 | 72250382.6 |
| M353T332 | Neochlorogenic<br>acid              | 353.084273 | 332.105 | 354.0951 | 10.0566 | C16H18O9         | C17147 | [M-H] <sup>-</sup>                  | mzCloud   | 3.1E-16 | neg | 2 | 17193902.8 |
| M195T816 | Neocnidilide                        | 195.13717  | 815.517 | 194.1307 | 4.13147 | C12H18O2         | C17002 | [M+H] <sup>+</sup>                  | BioDeepDB | 0.6321  | pos | 1 | 16385970.7 |
| M423T480 | Neolinustatin                       | 423.165385 | 479.541 | 423.1741 | 20.5947 | C17H29NO1<br>1   | C08336 | [M] <sup>-</sup>                    | BioDeepDB | 8.5E-08 | neg | 2 | 894451.213 |
| M595T498 | Neomycin                            | 595.295418 | 498.202 | 614.3123 | 2.53315 | C23H46N6O<br>13  | C01737 | [M-H <sub>2</sub> O-H] <sup>-</sup> | MoNA      | 0.61345 | neg | 1 | 351513.361 |
| M253T184 | Neopterin                           | 253.082241 | 183.708 | 253.0811 | 4.5097  | C9H11N5O4        | C05926 | [M] <sup>-</sup>                    | BioDeepDB | 0.6861  | neg | 1 | 5760471.54 |
| M316T291 | Neosaxitoxin                        | 316.137334 | 291.307 | 315.1291 | 3.0318  | C10H17N7O<br>5   | C17208 | [M+H] <sup>+</sup>                  | mzCloud   | 0.61976 | pos | 1 | 22816456.9 |
| M223T477 | Neostigmine                         | 223.143424 | 476.554 | 223.1447 | 3.02768 | C12H19N2O<br>2   | C07258 | [M+H] <sup>+</sup>                  | BioDeepDB | 5E-08   | pos | 2 | 15594621.7 |
| M217T777 | Nepodin                             | 217.086012 | 777.245 | 216.0786 | 0.42559 | C13H12O3         | C09954 | [M+H] <sup>+</sup>                  | OTCML     | 0.84974 | pos | 1 | 12103406.7 |
| M367T830 | Nervonic acid                       | 367.335602 | 830.193 | 366.3498 | 1.53831 | C24H46O2         | C08323 | [M+H] <sup>+</sup>                  | BioDeepDB | 0.63908 | pos | 1 | 3233826.91 |
| M266T584 | Nevirapine                          | 266.116488 | 584.417 | 266.1168 | 1.026   | C15H14N4O        | C07263 | [M] <sup>+</sup>                    | mzCloud   | 0.63409 | pos | 1 | 2344298.86 |



|                      |                                  |            |         |          |         |                       |        |                        |           |             |   |            |
|----------------------|----------------------------------|------------|---------|----------|---------|-----------------------|--------|------------------------|-----------|-------------|---|------------|
| M123T156             | Niacinamide<br>Nicotinamide      | 123.054937 | 156.393 | 122.048  | 2.75555 | C6H6N2O<br>C11H15N2O  | C00153 | [M+H] <sup>+</sup>     | BioDeepDB | 3.2E-05 pos | 2 | 604921028  |
| M255T100             | ribose<br>Nicotinamide           | 255.096866 | 100.146 | 255.0981 | 4.83922 | 5<br>C11H15N2O        | C03150 | [M] <sup>+</sup>       | MetaDNA   | 0.00233 pos | 2 | 82886996.3 |
| M333T545             | ribose<br>Nicotinate D-          | 333.049324 | 544.759 | 334.0566 | 0.00037 | 8P                    | C00455 | [M-H] <sup>-</sup>     | BioDeepDB | 0.16931 neg | 2 | 3946006.51 |
| M256T365             | ribonucleoside                   | 256.08108  | 365.475 | 256.0821 | 3.985   | C11H14N06             | C05841 | [M] <sup>-</sup>       | MetaDNA   | 7.6E-05 neg | 2 | 2475414.46 |
| M163T412             | Nicotine                         | 163.122539 | 411.838 | 162.1157 | 2.68193 | C10H14N2              | C00745 | [M+H] <sup>+</sup>     | BioDeepDB | 0.03931 pos | 2 | 3677890.73 |
| M122T425             | Nicotinic acid<br>Nicotinic acid | 122.022954 | 425.439 | 123.032  | 4.58754 | C6H5NO2<br>C11H15NO9  | C00253 | [M-H] <sup>-</sup>     | BioDeepDB | 1.2E-10 neg | 2 | 36500197.2 |
| M317T446             | mononucleotide                   | 317.028849 | 445.522 | 336.0484 | 3.66162 | P                     | C01185 | [M-H2O-H] <sup>-</sup> | BioDeepDB | 0.61961 neg | 1 | 556672.985 |
| M180T697             | Nicotinuric acid                 | 180.058141 | 697.061 | 180.0535 | 25.7761 | C8H8N2O3<br>C17H18N2O | C05380 | [M] <sup>-</sup>       | MoNA      | 0.95654 neg | 1 | 4485147.45 |
| M329T622             | Nifedipine                       | 329.112378 | 621.708 | 346.1165 | 4.01621 | 6<br>C13H9F3N2        | C07266 | [M+H-2O] <sup>+</sup>  | BioDeepDB | 0.78445 pos | 1 | 4011054.33 |
| M282T161             | Niflumic Acid                    | 282.064769 | 161.494 | 282.0616 | 11.2343 | O2<br>C12H10F3N       | C13698 | [M] <sup>+</sup>       | MoNA      | 0.99985 pos | 1 | 1654034.05 |
| M317T407             | Nilutamide                       | 317.064493 | 406.813 | 317.0623 | 6.91625 | 304<br>C21H26N2O      | C08164 | [M] <sup>-</sup>       | BioDeepDB | 0.9522 neg  | 1 | 1702204.67 |
| M419T521             | Nimodipine                       | 419.183735 | 520.739 | 418.174  | 5.80785 | 7<br>C20H24N2O        | C07267 | [M+H] <sup>+</sup>     | BioDeepDB | 0.8802 pos  | 1 | 22583027.4 |
| M388T361             | Nisoldipine                      | 388.166546 | 360.794 | 388.1634 | 8.1043  | 6<br>C15H11N3O        | C07699 | [M] <sup>+</sup>       | BioDeepDB | 0.97484 pos | 1 | 2568546.91 |
| M264T519             | Nitrazepam                       | 264.073959 | 519.257 | 281.08   | 5.27409 | 3                     | C07487 | [M+H-2O] <sup>+</sup>  | MoNA      | 0.87552 pos | 1 | 13648621.9 |
| M219T246             | Nitrofurantoin                   | 219.013562 | 246.013 | 238.0338 | 8.43644 | C8H6N4O5              | C07268 | [M-H2O-H] <sup>-</sup> | BioDeepDB | 0.99919 neg | 1 | 244044.408 |
| M198T280             | Nitrofurazone                    | 198.039563 | 280.275 | 198.0389 | 3.34812 | C6H6N4O4              | C08042 | [M] <sup>-</sup>       | BioDeepDB | 0.64667 neg | 1 | 1950030.99 |
| M311T552<br>M312T364 | Nivalenol                        | 311.114829 | 552.493 | 312.1209 | 3.86246 | C15H20O7<br>C12H21N5O | C06080 | [M-H] <sup>-</sup>     | MoNA      | 0.83602 neg | 1 | 2191593.52 |
| _1                   | Nizatidine                       | 312.093678 | 363.928 | 331.1137 | 5.22919 | 2S2                   | C07270 | [M-H2O-H] <sup>-</sup> | MoNA      | 0.74641 neg | 1 | 3162779.3  |
| M403T780             | Nobiletin                        | 403.14239  | 780.043 | 402.1315 | 8.96389 | C21H22O8              | C10112 | [M+H] <sup>+</sup>     | mzCloud   | 5.2E-08 pos | 2 | 8835907.21 |

|                                                         |                                                                            |                                                      |                                          |                                              |                                          |                                                  |                                      |                                                |                                        |                                          |                          |                  |                                                     |
|---------------------------------------------------------|----------------------------------------------------------------------------|------------------------------------------------------|------------------------------------------|----------------------------------------------|------------------------------------------|--------------------------------------------------|--------------------------------------|------------------------------------------------|----------------------------------------|------------------------------------------|--------------------------|------------------|-----------------------------------------------------|
| M389T407<br>M823T455<br>_1                              | Nodakenin<br>Nodularin                                                     | 389.122356<br>823.441656                             | 406.813<br>454.645                       | 408.142<br>824.4432                          | 3.30504<br>6.96107                       | C20H24O9<br>C41H60N8O<br>10                      | C09279<br>C15713                     | [M-H2O-H]-<br>[M-H]-                           | OTCML<br>mzCloud                       | 0.73624<br>0.87893                       | neg<br>neg               | 1<br>1           | 16891541.4<br>297683.051                            |
| M515T727<br>M299T830                                    | Nomilin<br>Nonadecanoic<br>acid                                            | 515.22546<br>299.256575                              | 726.707<br>830.193                       | 514.2203<br>298.2872                         | 4.10711<br>4.88229                       | C28H34O9<br>C19H38O2                             | C08773<br>C16535                     | [M+H]+<br>[M+H]+                               | BioDeepDB<br>BioDeepDB                 | 0.70078<br>0.68321                       | pos<br>pos               | 1<br>1           | 9655409.54<br>10216811.4                            |
| M221T721<br>M219T510<br>M287T252<br>_2                  | Nootkatol<br>Nootkatone<br>Nopaline                                        | 221.189366<br>219.173759<br>287.133798               | 720.704<br>510.333<br>251.555            | 220.1827<br>218.1671<br>304.1383             | 2.75973<br>2.81557<br>10.2117            | C15H24O<br>C15H22O<br>C11H20N4O<br>6             | C17915<br>C17914<br>C01682           | [M+H]+<br>[M+H]+<br>[M+H-H2O]+                 | MetaDNA<br>mzCloud<br>MetaDNA          | 6.2E-05<br>7.9E-05<br>0.05994            | pos<br>pos<br>pos        | 2<br>2<br>2      | 29878061<br>41320736.4<br>139681102                 |
| M314T302<br>M286T443<br>M270T317<br>_1<br>M170T36<br>_1 | Norboldine<br>Norcodeine<br>Nordazepam<br>Norepinephrine                   | 314.14027<br>286.142007<br>270.059897<br>169.976991  | 302.191<br>443.256<br>317.199<br>35.8675 | 313.1314<br>285.1365<br>270.056<br>169.0739  | 4.99651<br>6.18342<br>14.4301<br>2.27344 | C18H19N04<br>C17H19N03<br>C15H11C1N<br>20        | C16984<br>C16576<br>C07486           | [M+H]+<br>[M+H]+<br>[M]+                       | OTCML<br>mzCloud<br>mzCloud            | 0.69684<br>0.73<br>0.80257               | pos<br>pos<br>pos        | 1<br>1<br>1      | 2461273.61<br>32759521.6<br>3794726.34              |
| M298T631<br>M323T519<br>M302T513<br>M166T113<br>_2      | Norethindrone<br>Norethindrone<br>acetate<br>Norfloxacin<br>Normetanephine | 298.200268<br>323.196758<br>302.124667<br>166.08618  | 630.507<br>519.257<br>513.285<br>112.781 | 298.1933<br>340.2038<br>319.1332<br>183.0895 | 23.366<br>1.21303<br>3.63707<br>24.7695  | C20H26O2<br>C22H28O3<br>C16H18FN3<br>03          | C05028<br>C08152<br>C06687<br>C05589 | [M]+<br>[M+H-H2O]+<br>[M+H-H2O]+<br>[M+H-H2O]+ | MoNA<br>GNPS<br>MoNA<br>BioDeepDB      | 0.93966<br>0.98837<br>0.86162<br>7E-06   | pos<br>pos<br>pos<br>pos | 1<br>1<br>1<br>2 | 2404145.23<br>2512289.81<br>1061077.32<br>146088808 |
| M147T767<br>M156T293<br>M246T325<br>M612T622<br>_2      | Nornicotine<br>Norselegiline<br>Nortriptyline<br>Novobiocin                | 146.964328<br>156.112618<br>246.163172<br>612.234435 | 767.145<br>292.623<br>325.35<br>621.547  | 148.1<br>173.1204<br>263.1674<br>612.2319    | 3.09724<br>2.22771<br>13.0245<br>4.14023 | C9H12N2<br>C12H15N<br>C19H21N<br>C31H36N2O<br>11 | C06524<br>C15476<br>C07274<br>C05080 | [M-H]-<br>[M+H-H2O]+<br>[M+H-H2O]+<br>[M]-     | BioDeepDB<br>BioDeepDB<br>MoNA<br>MoNA | 1.7E-18<br>0.99116<br>0.99996<br>0.78589 | neg<br>pos<br>pos<br>neg | 2<br>1<br>1<br>1 | 180109729<br>149531620<br>6131035.66<br>5158450.05  |

## C47H75N01

|                            |                                                 |                          |                    |                      |                    |                        |                  |                                             |                        |                    |            |        |                          |
|----------------------------|-------------------------------------------------|--------------------------|--------------------|----------------------|--------------------|------------------------|------------------|---------------------------------------------|------------------------|--------------------|------------|--------|--------------------------|
| M927T652<br>M204T203<br>_1 | Nystatin<br>O-<br>Acetylcarnitine               | 926.523462<br>204.12254  | 651.956<br>203.36  | 925.5035<br>204.1236 | 13.6661<br>5.19083 | 7<br>C9H18N04          | C06572<br>C02571 | [M+H] <sup>+</sup><br>[M] <sup>+</sup>      | BioDeepDB<br>mzCloud   | 0.86099<br>0.6623  | pos<br>pos | 1<br>1 | 5599182.11<br>5965512.66 |
| M148T127<br>M141T69<br>_1  | O-Acetylserine<br>O-<br>Phosphoethanolam<br>O-  | 148.059337<br>141.01782  | 126.785<br>69.2834 | 147.0532<br>141.0191 | 7.17865<br>9.07627 | C5H9N04<br>C2H8N04P    | C00979<br>C00346 | [M+H] <sup>+</sup><br>[M] <sup>+</sup>      | BioDeepDB<br>BioDeepDB | 0.0039<br>2.7E-12  | pos<br>pos | 2<br>2 | 83328293<br>4002574      |
| M199T221<br>M244T111<br>_1 | Phosphothreonine<br>O-<br>Phosphotyrosine<br>O- | 199.023485<br>244.033495 | 221.453<br>111.382 | 199.0246<br>261.0402 | 5.60292<br>2.98766 | C4H10N06P<br>C9H12N06P | C12147<br>C06501 | [M] <sup>-</sup><br>[M+H-20] <sup>+</sup>   | BioDeepDB<br>MoNA      | 0.63029<br>0.68847 | neg<br>pos | 1<br>1 | 1139345.93<br>3927332.8  |
| M218T369<br>M200T92        | Propanoylcarniti<br>O-Succinyl-L-<br>homoserine | 218.1387<br>200.055246   | 369.321<br>91.9113 | 217.1314<br>219.0743 | 0.11167<br>3.32048 | C10H19N04<br>C8H13N06  | C03017<br>C01118 | [M+H] <sup>+</sup><br>[M-20-H] <sup>-</sup> | mzCloud<br>BioDeepDB   | 0.62246<br>0.60835 | pos<br>neg | 1<br>1 | 7452574.49<br>70144322.8 |
| M107T451<br>M455T829<br>_2 | o-Xylene<br>Obacunone                           | 107.085261<br>455.211494 | 450.503<br>828.73  | 106.0783<br>454.1992 | 2.23286<br>11.024  | C8H10<br>C26H3007      | C07212<br>C08775 | [M+H] <sup>+</sup><br>[M+H] <sup>+</sup>    | BioDeepDB<br>mzCloud   | 5.8E-09<br>0.72182 | pos<br>pos | 2<br>1 | 15112875.4<br>29664943.5 |
| M284T773<br>M361T461<br>_1 | Octadecanamide<br>Ofloxacin                     | 284.292893<br>361.149592 | 773.437<br>460.89  | 283.2875<br>361.1438 | 6.62467<br>16.0367 | C18H37NO<br>C18H20FN3  | C13846<br>C07321 | [M+H] <sup>+</sup><br>[M] <sup>-</sup>      | GNPS<br>GNPS           | 0.68986<br>0.98176 | pos<br>neg | 1<br>1 | 11955244.3<br>3481359.7  |
| M804T682<br>_2             | Okadaic acid                                    | 804.48298                | 681.885            | 804.466              | 4.77774            | C44H68O13              | C01945           | [M-<br>H2O+NH4] <sup>+</sup>                | mzCloud                | 0.66873            | pos        | 1      | 1430704.24               |
| M293T546                   | Olanzapine                                      | 293.122561               | 546.308            | 312.1409             | 0.17506            | C17H20N4S              | C07322           | [M-20-H] <sup>-</sup>                       | GNPS                   | 0.79724            | neg        | 1      | 1196482.1                |
| M282T762                   | Oleamide                                        | 282.277993               | 762.439            | 281.2719             | 3.92172            | C18H35NO<br>C35H61N01  | C19670           | [M+H] <sup>+</sup>                          | BioDeepDB              | 0.67055            | pos        | 1      | 4631419.52               |
| M670T775                   | Oleandomycin                                    | 670.399372               | 774.919            | 687.4194             | 18.7851            | 2                      | C01946           | [M+H-20] <sup>+</sup>                       | MoNA                   | 1                  | pos        | 1      | 37782369.6               |
| M439T669                   | Oleanolic acid                                  | 439.353349               | 668.867            | 456.3603             | 1.10034            | C30H48O3               | C17148           | [M+H-20] <sup>+</sup>                       | mzCloud                | 2.8E-19            | pos        | 2      | 144194902                |
| M282T795                   | Oleic acid                                      | 282.277916               | 795.165            | 282.2559             | 1.93791            | C18H34O2               | C00712           | [M] <sup>+</sup>                            | BioDeepDB              | 1.6E-10            | pos        | 2      | 454011834                |
| M325T293                   | Oleylethanolami<br>de                           | 325.306522               | 292.623            | 325.2981             | 25.8899            | C20H39N02              | C20792           | [M] <sup>+</sup>                            | mzCloud                | 0.83263            | pos        | 1      | 1084586.89               |

|                        |                 |            |         |          |         |                        |        |            |           |         |     |   |            |
|------------------------|-----------------|------------|---------|----------|---------|------------------------|--------|------------|-----------|---------|-----|---|------------|
| M521T94                | Oleuropein      | 521.16753  | 94.1615 | 540.1843 | 3.10925 | C25H32O13              | C09794 | [M-H2O-H]- | MetaDNA   | 0.01442 | neg | 2 | 22385379.9 |
| M337T767               | Olopatadine     | 337.167518 | 766.742 | 337.1678 | 0.83761 | C21H23NO3<br>C17H19N3O | C07789 | [M]+       | MoNA      | 0.6356  | pos | 1 | 35814933.1 |
| M345T509               | Omeprazole      | 345.117649 | 509.11  | 345.1147 | 8.54431 | 3S<br>C5H12NO4P        | C07324 | [M]-       | GNPS      | 0.91447 | neg | 1 | 3821218.43 |
| M196T690               | Omethoate       | 196.015552 | 689.5   | 213.0225 | 2.47763 | S                      | C18662 | [M+H2O]+   | BioDeepDB | 0.99177 | pos | 1 | 41326218.3 |
| M293T699               | Ondansetron     | 293.14945  | 699.389 | 293.1528 | 11.427  | C18H19N3O              | C07325 | [M]+       | MoNA      | 0.80091 | pos | 1 | 6687705.87 |
| M431T777               | Ononin          | 431.136004 | 777.245 | 430.1264 | 5.39971 | C22H22O9               | C10509 | [M+H]+     | mzCloud   | 0.71845 | pos | 1 | 7618253.98 |
| M837T659               | Ophiopogonin D  | 837.464636 | 658.953 | 854.4664 | 6.78728 | C44H70O16<br>C11H19N3O | C17042 | [M+H2O]+   | OTCML     | 0.99823 | pos | 1 | 4717395.56 |
| M270T161               | Ophthalmate     | 270.108878 | 161.184 | 289.1274 | 0.48778 | 6<br>C12H16C1N         | C21016 | [M-H2O-H]- | BioDeepDB | 0.58316 | neg | 1 | 2180770.36 |
| M257T396               | Orbencarb       | 257.065258 | 396.415 | 257.0641 | 4.45398 | OS                     | C11087 | [M]+       | mzCloud   | 0.86247 | pos | 1 | 18835235.1 |
| M212T422               | Orciprenaline   | 212.127577 | 421.784 | 211.1208 | 2.35401 | C11H17NO3              | C07144 | [M+H]+     | BioDeepDB | 0.63179 | pos | 1 | 2617188.63 |
| M133T80<br>M157T39_2   | Ornithine       | 133.096324 | 79.643  | 132.0899 | 3.01934 | C5H12N2O2              | C00077 | [M+H]+     | BioDeepDB | 1.6E-22 | pos | 2 | 343387327  |
|                        | Orotic acid     | 157.027864 | 39.4128 | 156.0171 | 22.1674 | C5H4N2O4<br>C10H13N2O  | C00295 | [M+H]+     | MoNA      | 1       | pos | 1 | 3041504.29 |
| M351T321               | Orotidylic acid | 351.015202 | 321.198 | 368.0257 | 8.72858 | 11P                    | C01103 | [M+H2O]+   | MoNA      | 0.73509 | pos | 1 | 17083753   |
| M124T250               | ortho-Anisidine | 124.075844 | 250.144 | 123.0684 | 1.35042 | C7H9NO                 | C19191 | [M+H]+     | mzCloud   | 0.65052 | pos | 1 | 23630023.5 |
| M404T339               | Osajin          | 404.165635 | 339.085 | 404.1624 | 8.00497 | C25H24O5               | C10511 | [M]+       | mzCloud   | 0.81038 | pos | 1 | 1073867.49 |
| M227T386<br>M297T773_2 | Osthol          | 227.102208 | 386.352 | 244.1099 | 1.1349  | C15H16O3               | C09280 | [M+H2O]+   | mzCloud   | 0.72916 | pos | 1 | 8515957.34 |
| M583T584_1             | Ostruthin       | 297.151567 | 773.333 | 298.1569 | 6.5385  | C19H22O3               | C09281 | [M-H]-     | mzCloud   | 0.64994 | neg | 1 | 2653127.59 |
| M401T456_1             | Ouabain         | 583.276435 | 584.484 | 584.2833 | 0.70449 | C29H44O12<br>C19H19N3O | C01443 | [M-H]-     | mzCloud   | 0.63427 | neg | 1 | 1870796.38 |
|                        | Oxacillin       | 401.10696  | 456.2   | 401.1045 | 6.13412 | 5S                     | C07334 | [M]-       | BioDeepDB | 0.92256 | neg | 1 | 14583913.5 |

|                        |                               | C15H18C12                |                    |                      |                    |                             |                  |                  |                        |                    |            |        |                          |
|------------------------|-------------------------------|--------------------------|--------------------|----------------------|--------------------|-----------------------------|------------------|------------------|------------------------|--------------------|------------|--------|--------------------------|
| M327T176               | Oxadiazon                     | 327.066482               | 175.952            | 344.0694             | 13.8089            | N2O3                        | C18496           | [M+H-H2O]+       | MoNA                   | 0.99998            | pos        | 1      | 6598100.5                |
| M113T526               | Oxalacetic acid               | 112.984952               | 526.124            | 132.0059             | 3.75931            | C4H4O5<br>C14H21N3O         | C00036           | [M-H2O-H]-       | BioDeepDB              | 0.61557            | neg        | 1      | 39904489.3               |
| M280T504               | Oxamiquine                    | 280.165131               | 504.466            | 279.1583             | 1.5566             | 3                           | C07341           | [M+H]+           | MoNA                   | 0.84385            | pos        | 1      | 18621239                 |
| M293T512               | Oxaprozin                     | 293.102558               | 512.228            | 293.1052             | 8.99162            | C18H15N03<br>C15H11C1N      | C07356           | [M]-             | mzCloud                | 0.88638            | neg        | 1      | 295168.913               |
| M286T393               | Oxazepam<br>Oxidized          | 286.055505               | 392.905            | 286.0509             | 16.0781            | 202<br>C20H32N6O            | C07359           | [M]-             | mzCloud                | 0.87345            | neg        | 1      | 195992.084               |
| M613T143<br>M159T66_1  | glutathione<br>Oxoadipic acid | 613.158901<br>158.978299 | 142.85<br>66.2043  | 612.152<br>160.0372  | 0.01716<br>7.1822  | 12S2<br>C6H8O5              | C00127<br>C00322 | [M+H]+<br>[M-H]- | BioDeepDB<br>BioDeepDB | 0.57828<br>7.3E-07 | pos<br>neg | 1<br>2 | 6321749.84<br>81421422.7 |
| M146T94                | Oxoglutaric acid              | 146.01623                | 94.1615            | 146.0215             | 1.14359            | C5H6O5                      | C00026           | [M]-             | BioDeepDB              | 0.58606            | neg        | 1      | 73862903.2               |
| M261T294<br>M608T659_2 | Oxolinic acid<br>Oxyacanthine | 261.059444<br>608.281475 | 293.896<br>658.953 | 261.0637<br>608.2886 | 16.3039<br>11.7126 | C13H11N05<br>C37H40N2O<br>6 | C11342<br>C09598 | [M]+<br>[M]+     | mzCloud<br>MoNA        | 0.89539<br>0.83708 | pos<br>pos | 1<br>1 | 3345697.25<br>33760318.8 |
| M357T816               | Oxybutynin                    | 357.225173               | 815.517            | 357.2304             | 14.6144            | C22H31N03                   | C07360           | [M]+             | mzCloud                | 0.77401            | pos        | 1      | 11890186.8               |
| M298T725               | Oxycodone                     | 298.142632               | 725.212            | 315.1471             | 9.94938            | C18H21N04<br>C15H24N2O      | C08018           | [M+H-H2O]+       | mzCloud                | 0.73757            | pos        | 1      | 4227561.52               |
| M264T419               | Oxymatrine                    | 264.182763               | 418.97             | 264.1838             | 3.84269            | 2                           | C10749           | [M]+             | OTCML                  | 0.82223            | pos        | 1      | 16152161                 |
| M260T549               | Oxymetazoline                 | 260.185031               | 549.375            | 260.1889             | 14.8686            | C16H24N2O                   | C07363           | [M]+             | BioDeepDB              | 0.94027            | pos        | 1      | 15385063                 |
| M302T144               | Oxymorphone                   | 302.13329                | 143.959            | 301.1314             | 17.8271            | C17H19N04<br>C19H20N2O      | C08019           | [M+H]+           | mzCloud                | 0.00015            | pos        | 2      | 228405229                |
| M324T448               | Oxyphenbutazone               | 324.147932               | 447.531            | 324.1474             | 1.64145            | 3                           | C19494           | [M]+             | mzCloud                | 0.73647            | pos        | 1      | 11934938.1               |
| M152T294               | Oxypurinol                    | 152.032772               | 294.152            | 152.0334             | 4.12872            | C5H4N4O2                    | C07599           | [M]-             | BioDeepDB              | 0.66529            | neg        | 1      | 10306748.4               |
| M245T143               | Oxyresveratrol                | 245.075395               | 142.85             | 244.0736             | 19.197             | C14H12O4<br>C22H24N2O       | C10273           | [M+H]+           | OTCML                  | 0.99578            | pos        | 1      | 33335153.1               |
| M460T515               | Oxytetracycline               | 460.15121                | 514.727            | 460.1482             | 6.54239            | 9                           | C06624           | [M]+             | mzCloud                | 0.68026            | pos        | 1      | 867436.504               |

|          |                         |            |         |          |         |             |        |                       |           |         |     |   |            |
|----------|-------------------------|------------|---------|----------|---------|-------------|--------|-----------------------|-----------|---------|-----|---|------------|
| M138T97  | p-Aminobenzoic acid     | 138.05316  | 96.7698 | 137.0477 | 8.08348 | C7H7NO2     | C00568 | [M+H] <sup>+</sup>    | BioDeepDB | 1.9E-06 | pos | 2 | 2345803192 |
| M137T350 | p-Anisaldehyde          | 137.06015  | 349.911 | 136.0524 | 3.4555  | C8H8O2      | C10761 | [M+H] <sup>+</sup>    | mzCloud   | 0.65364 | pos | 1 | 22980882.6 |
| M151T416 | p-Anisic acid           | 151.037623 | 416.128 | 152.0473 | 15.8958 | C8H8O3      | C02519 | [M-H] <sup>-</sup>    | MoNA      | 0.00656 | neg | 2 | 13876224.1 |
| M337T361 | p-Coumaroyl quinic acid | 337.092279 | 360.831 | 338.1002 | 1.91341 | C16H18O8    | C12208 | [M-H] <sup>-</sup>    | MetaDNA   | 0.01003 | neg | 2 | 15799835.5 |
| M109T543 | p-Cresol                | 109.064458 | 542.766 | 108.0575 | 2.91694 | C7H8O       | C01468 | [M+H] <sup>+</sup>    | BioDeepDB | 0.65559 | pos | 1 | 14404061.2 |
| M135T814 | p-Cymene                | 135.116921 | 814.095 | 134.1096 | 0.3304  | C10H14      | C06575 | [M+H] <sup>+</sup>    | BioDeepDB | 0.59649 | pos | 1 | 17162748.8 |
| M183T91  | p-Fluorophenylalanine   | 183.074576 | 90.9026 | 183.0696 | 27.1788 | C9H10FN02   | C11217 | [M] <sup>-</sup>      | BioDeepDB | 1       | neg | 1 | 18189297   |
| M123T299 | p-Hydroxybenzyl alcohol | 123.043631 | 298.619 | 124.0524 | 12.1329 | C7H8O2      | C17467 | [M-H] <sup>-</sup>    | mzCloud   | 0.74694 | neg | 1 | 1447884.46 |
| M153T301 | p-Hydroxyphenylacetone  | 153.054852 | 300.782 | 152.0473 | 1.80449 | C8H8O3      | C00642 | [M+H] <sup>+</sup>    | BioDeepDB | 0.5992  | pos | 1 | 13185876.4 |
| M163T635 | p-Methoxycinnamaldehyde | 163.075033 | 635.022 | 162.0681 | 2.10357 | C10H10O2    | C10475 | [M+H] <sup>+</sup>    | mzCloud   | 0.66004 | pos | 1 | 18814025.4 |
| M136T399 | p-Octopamine            | 136.075407 | 399.046 | 153.079  | 28.2298 | C8H11NO2    | C04227 | [M+H-2O] <sup>+</sup> | BioDeepDB | 0.00014 | pos | 2 | 9838676.05 |
| M529T800 | Pachymic acid           | 529.386236 | 800.484 | 528.3815 | 3.89841 | C33H52O5    | C17044 | [M+H] <sup>+</sup>    | OTCML     | 0.9947  | pos | 1 | 2329187.09 |
| M294T787 | Paclobutrazol           | 294.134725 | 786.569 | 293.1295 | 6.97374 | C15H20ClN3O | C18479 | [M+H] <sup>+</sup>    | mzCloud   | 4.3E-10 | pos | 2 | 19485279.5 |
| M460T291 | Paeonolide              | 460.154976 | 291.076 | 460.1581 | 6.73617 | C20H28O12   | C10715 | [M] <sup>-</sup>      | OTCML     | 0.71365 | neg | 1 | 669084.062 |
| M353T190 | Palmitine               | 353.163261 | 189.571 | 352.1549 | 3.12178 | +           | C05315 | [M+H] <sup>+</sup>    | OTCML     | 0.74012 | pos | 1 | 5778462.29 |
| M255T835 | Palmitic acid           | 255.071996 | 835.329 | 256.2402 | 0.69931 | C16H32O2    | C00249 | [M-H] <sup>-</sup>    | BioDeepDB | 0.58393 | neg | 1 | 18858615.6 |
| M218T212 | Pantothenic acid        | 218.102989 | 212.366 | 219.1107 | 0.08451 | C9H17NO5    | C00864 | [M-H] <sup>-</sup>    | BioDeepDB | 6.3E-35 | neg | 2 | 52421759.2 |
| M188T216 | Pantothenol             | 188.127402 | 216.359 | 205.1314 | 18.262  | C9H19NO4    | C05944 | [M+H-2O] <sup>+</sup> | MoNA      | 0.06262 | pos | 2 | 6004241.91 |
| M322T777 | Papaverine              | 322.148007 | 777.245 | 339.1471 | 25.8905 | C20H21NO4   | C06533 | [M+H-2O] <sup>+</sup> | mzCloud   | 0.86918 | pos | 1 | 23459964.8 |

|          |                  |            |         |          |         |           |           |           |            |           |         |     |            |            |
|----------|------------------|------------|---------|----------|---------|-----------|-----------|-----------|------------|-----------|---------|-----|------------|------------|
| M258T137 | Paraoxon         | 258.048533 | 137.373 | 275.0559 | 0.25865 | P         | C10H14N06 | C06606    | [M+H-20]+  | BioDeepDB | 0.6399  | pos | 1          | 5863731.07 |
| M292T443 | Parathion        | 292.048848 | 443.256 | 291.033  | 29.2487 | PS        | C10H14N05 | C06604    | [M+H]+     | MoNA      | 0.87868 | pos | 1          | 12291974.3 |
| M246T74  | Parathion-methyl | 245.994132 | 73.8324 | 263.0017 | 0.54422 | S         | C8H10N05P | C14228    | [M+H-20]+  | MoNA      | 0.98625 | pos | 1          | 44661899.2 |
| M180T86  | Paraxanthine     | 180.085166 | 85.6453 | 180.0647 | 1.98914 | C7H8N4O2  | C13747    | [M+H-20]+ | BioDeepDB  | 3.4E-05   | pos     | 2   | 528454225  |            |
| M614T549 | Paromomycin      | 614.290857 | 549.371 | 615.2963 | 2.98235 | 14        | C23H45N5O | C00832    | [M-H]-     | MoNA      | 0.62435 | neg | 1          | 982958.415 |
| M247T586 | Parthenolide     | 247.132687 | 586.044 | 248.1412 | 5.00514 | C15H20O3  | C07609    | [M-H]-    | BioDeepDB  | 0.99639   | neg     | 1   | 711658.913 |            |
| M434T805 | Paxilline        | 434.237195 | 805.145 | 435.241  | 7.993   | C27H33N04 | C13782    | [M-H]-    | GNPS       | 0.67841   | neg     | 1   | 12115241.3 |            |
| M314T195 | Pectolinarigenin | 314.080297 | 195.23  | 314.079  | 4.0094  | C17H14O6  | C17784    | [M]+      | OTCML      | 0.99489   | pos     | 1   | 6605552.84 |            |
| M159T35  | Pelargonic acid  | 158.985651 | 34.5397 | 158.1307 | 0.13388 | C9H18O2   | C01601    | [M+H]+    | BioDeepDB  | 6.8E-07   | pos     | 2   | 18627539.4 |            |
| M272T144 | Pelargonidin     | 272.064563 | 143.959 | 271.0606 | 12.1786 | C15H11O5  | C05904    | [M+H]+    | mzCloud    | 0.91505   | pos     | 1   | 51592664.9 |            |
| M142T584 | Pelletierine     | 142.122377 | 584.417 | 141.1154 | 1.56795 | C8H15N0   | C06182    | [M+H]+    | BioDeepDB  | 0.67354   | pos     | 1   | 6530000.66 |            |
| M292T702 | Penbutolol       | 292.225718 | 702.055 | 291.2198 | 4.6475  | C18H29N02 | C07416    | [M+H]+    | mzCloud    | 0.7884    | pos     | 1   | 4685194.48 |            |
| M252T773 | Penciclovir      | 252.109026 | 773.333 | 253.1175 | 4.70924 | 3         | C10H15N5O | C07417    | [M-H]-     | MoNA      | 0.67015 | neg | 1          | 1030288.2  |
| M309T106 | Pencycuron       | 309.117215 | 105.537 | 328.1342 | 4.54646 | 20        | C19H21C1N | C11012    | [M-H20-H]- | BioDeepDB | 0.99575 | neg | 1          | 6169228.36 |
| M281T597 | Pendimethalin    | 281.13889  | 596.795 | 281.1376 | 4.58772 | 4         | C13H19N3O | C11019    | [M]-       | mzCloud   | 0.73376 | neg | 1          | 2601546.8  |
| M171T614 | Penicillic acid  | 171.064592 | 614.215 | 170.0579 | 3.41519 | C8H10O4   | C16804    | [M+H]+    | mzCloud    | 0.65995   | pos     | 1   | 42798024   |            |
| M333T209 | Penicillin G     | 333.091141 | 209.472 | 334.0987 | 0.84906 | 4S        | C16H18N2O | C05551    | [M-H]-     | BioDeepDB | 0.59365 | neg | 1          | 3466458.25 |
| M349T182 | Penicillin V     | 349.087148 | 182.156 | 350.0936 | 2.14312 | 5S        | C16H18N2O | C08126    | [M-H]-     | BioDeepDB | 0.62566 | neg | 1          | 8129846.47 |
| M633T537 | Penitrem A       | 633.274439 | 536.761 | 633.2857 | 17.7821 | 06        | C37H44C1N | C20070    | [M]+       | MoNA      | 1       | pos | 1          | 665345.069 |

|          |                            |            |         |          |         |           |        |           |           |             |   |            |
|----------|----------------------------|------------|---------|----------|---------|-----------|--------|-----------|-----------|-------------|---|------------|
| M482T778 | Penoxsulam                 | 482.047302 | 777.92  | 483.0636 | 18.7155 | 505S      | C18481 | [M-H]-    | mzCloud   | 1 neg       | 1 | 889144.887 |
| M241T784 | Pentadecanoic acid         | 241.216567 | 784.051 | 242.2246 | 3.13648 | C15H30O2  | C16537 | [M-H]-    | BioDeepDB | 0.61597 neg | 1 | 2041740.45 |
| M323T719 | Pentamidine                | 323.182981 | 719.215 | 340.1899 | 1.5941  | C11H16N4O | C07420 | [M+H-2O]+ | mzCloud   | 0.6442 pos  | 1 | 5854921.8  |
| M267T793 | Pentostatin                | 267.108064 | 793.233 | 268.1172 | 6.87296 | C13H18N4O | C02267 | [M-H]-    | BioDeepDB | 0.67659 neg | 1 | 443034.984 |
| M278T490 | Pentoxifylline             | 278.137673 | 489.826 | 278.1379 | 0.78084 | C10H16N2O | C07424 | [M]+      | mzCloud   | 0.60497 pos | 1 | 2229610.43 |
| M139T246 | Pentylenetetrazone         | 139.094243 | 246.372 | 138.0905 | 25.4034 | C6H10N4   | C13692 | [M+H]+    | BioDeepDB | 1 pos       | 1 | 7405812.85 |
| M153T535 | Perillyl alcohol           | 153.127043 | 535.329 | 152.1201 | 2.13324 | C10H16O   | C02452 | [M+H]+    | BioDeepDB | 7.4E-11 pos | 2 | 59077148.9 |
| M367T583 | Perindopril                | 367.21501  | 582.96  | 368.2311 | 24.0017 | C21H32N2O | C07706 | [M-H]-    | MoNA      | 0.96514 neg | 1 | 360998.557 |
| M404T420 | Perphenazine               | 404.153815 | 420.274 | 403.1485 | 4.85322 | C21H26ClN | C07427 | [M+H]+    | mzCloud   | 0.65946 pos | 1 | 3843317.01 |
| M478T537 | Petunidin 3-glucoside      | 478.10189  | 537.051 | 479.119  | 19.3199 | C22H23O12 | C12139 | [M-H]-    | MoNA      | 0.96835 neg | 1 | 952559.068 |
| M933T190 | Petunidin-3-(p-coumaroyl)- | 933.265202 | 189.717 | 933.2665 | 1.39107 | C43H49O23 | C16295 | [M]-      | MoNA      | 0.9889 neg  | 1 | 504785.836 |
| M517T103 | Phellamurin                | 517.175097 | 102.948 | 518.1788 | 6.90923 | C26H30O11 | C09808 | [M-H]-    | mzCloud   | 0.79258 neg | 1 | 3151307.24 |
| M343T503 | Phellodendrine             | 343.169419 | 503.046 | 342.1705 | 24.4472 | C20H24NO4 | C17046 | [M+H]+    | OTCML     | 0.86405 pos | 1 | 12648127.8 |
| M177T375 | Phenacemide                | 177.065543 | 374.746 | 178.0742 | 7.79806 | C9H10N2O2 | C07428 | [M-H]-    | BioDeepDB | 0.76972 neg | 1 | 724049.251 |
| M180T635 | Phenacetin                 | 180.10045  | 635.022 | 179.0946 | 7.9176  | C10H13NO2 | C07591 | [M+H]+    | mzCloud   | 0.79885 pos | 1 | 15619009.4 |
| M174T266 | Phendimetrazine            | 174.12308  | 265.624 | 191.131  | 2.79049 | C12H17NO  | C07904 | [M+H-2O]+ | MoNA      | 0.63013 pos | 1 | 11075160.1 |
| M137T244 | Phenelzine                 | 137.106818 | 244.085 | 136.1    | 3.34369 | C8H12N2   | C07430 | [M+H]+    | GNPS      | 0.61967 pos | 1 | 3474101.7  |
| M283T196 | Phenethylcaffeate          | 283.102259 | 195.791 | 284.1049 | 16.3712 | C17H16O4  | C10484 | [M-H]-    | BioDeepDB | 1 neg       | 1 | 6187109.83 |
| M339T324 | Pheniramine maleate        | 339.166965 | 323.984 | 356.1736 | 2.3566  | C16H20N2  | C12574 | [M+H-2O]+ | BioDeepDB | 0.99148 pos | 1 | 13952577.1 |



|            |                       |            |         |          |         |                        |        |                       |           |         |             |   |            |
|------------|-----------------------|------------|---------|----------|---------|------------------------|--------|-----------------------|-----------|---------|-------------|---|------------|
| M160T81    | Phenmetrazine         | 160.107335 | 80.824  | 177.1154 | 3.94317 | C11H15NO<br>C12H12N2O  | C07432 | [M+H-20] <sup>+</sup> | mzCloud   | 0.62608 | pos         | 1 | 3863868.87 |
| M231T537   | Phenobarbital         | 231.07645  | 537.051 | 232.0848 | 4.61331 | 3                      | C07434 | [M-H] <sup>-</sup>    | MoNA      | 0.85574 | neg         | 1 | 400807.137 |
| M94T61     | Phenol                | 94.0454951 | 61.1538 | 94.0419  | 0.42999 | C6H6O                  | C00146 | [M] <sup>+</sup>      | BioDeepDB | 0.00046 | pos         | 2 | 58880877.2 |
| M174T79_1  | Phenolic phosphate    | 174.010919 | 79.4105 | 174.0082 | 15.6246 | C6H7O4P                | C02734 | [M] <sup>-</sup>      | MoNA      |         | 1 neg       | 1 | 47116858.5 |
| M318T445   | Phenolphthalein       | 318.082539 | 444.725 | 318.0892 | 20.9396 | C20H14O4<br>C18H22C1N  | C14286 | [M] <sup>+</sup>      | mzCloud   | 0.90807 | pos         | 1 | 26101300.2 |
| M286T459   | Phenoxybenzamine      | 286.128345 | 458.985 | 303.139  | 11.2572 | 0<br>C12H17O4P         | C07435 | [M+H-20] <sup>+</sup> | BioDeepDB | 0.9606  | pos         | 1 | 5630046.3  |
| M319T69    | Phenthoate            | 319.029794 | 69.1983 | 320.0306 | 20.2794 | S2                     | C14429 | [M-H] <sup>-</sup>    | BioDeepDB |         | 1 neg       | 1 | 140819.735 |
| M135T804   | Phenyl acetate        | 135.043502 | 803.615 | 136.0524 | 12.0141 | C8H8O2                 | C00548 | [M-H] <sup>-</sup>    | BioDeepDB |         | 2E-15 neg   | 2 | 2581172.57 |
| M119T340   | Phenylacetaldehyde    | 119.048564 | 339.772 | 120.0575 | 2.08882 | C8H8O                  | C00601 | [M-H] <sup>-</sup>    | BioDeepDB |         | 4E-05 neg   | 2 | 8964961.97 |
| M137T209   | Phenylacetic acid     | 137.132806 | 208.905 | 136.0524 | 4.17145 | C8H8O2<br>C13H16N2O    | C07086 | [M+H] <sup>+</sup>    | BioDeepDB |         | 1.8E-14 pos | 2 | 16471675.4 |
| M265T347   | Phenylacetylglutamine | 265.117548 | 347.175 | 264.111  | 2.74709 | 4                      | C04148 | [M+H] <sup>+</sup>    | mzCloud   | 0.61062 | pos         | 1 | 12596039.4 |
| M194T506   | Phenylacetylglycine   | 194.08115  | 505.855 | 193.0739 | 0.13507 | C10H11NO3<br>C19H20N2O | C05598 | [M+H] <sup>+</sup>    | BioDeepDB | 0.57667 | pos         | 1 | 102012347  |
| M307T535   | Phenylbutazone        | 307.148844 | 535.488 | 308.1525 | 11.7846 | 2                      | C07440 | [M-H] <sup>-</sup>    | mzCloud   | 0.85456 | neg         | 1 | 358088.149 |
| M109T158   | Phenylenediamine      | 109.075592 | 157.773 | 108.0687 | 3.52363 | C6H8N2                 | C02454 | [M+H] <sup>+</sup>    | MoNA      | 0.99401 | pos         | 1 | 9275741.76 |
| M168T184   | Phenylephrine         | 168.101424 | 183.886 | 167.0946 | 2.69089 | C9H13NO2               | C07441 | [M+H] <sup>+</sup>    | mzCloud   | 0.61811 | pos         | 1 | 19170541.4 |
| M138T354   | Phenylethanolamine    | 138.091723 | 353.978 | 137.0841 | 2.5137  | C8H11NO                | C02735 | [M+H] <sup>+</sup>    | mzCloud   | 0.59957 | pos         | 1 | 15440013.1 |
| M121T427   | Phenylethylamine      | 121.064434 | 426.913 | 121.0891 | 5.57578 | C8H11N                 | C05332 | [M] <sup>-</sup>      | BioDeepDB |         | 4.2E-05 neg | 2 | 528810.686 |
| M149T350   | Phenylglyoxylic acid  | 149.025823 | 350.108 | 150.0317 | 9.38929 | C8H6O3                 | C02137 | [M-H] <sup>-</sup>    | BioDeepDB | 0.76208 | neg         | 1 | 1529964.63 |
| M165T362_2 | Phenyllactate         | 165.054053 | 362.384 | 166.063  | 10.1213 | C9H10O3                | C05607 | [M-H] <sup>-</sup>    | mzCloud   |         | 2.7E-06 neg | 2 | 56700293.4 |

|                            |                                                       |            |         |          |         |                       |        |           |           |         |     |   |            |
|----------------------------|-------------------------------------------------------|------------|---------|----------|---------|-----------------------|--------|-----------|-----------|---------|-----|---|------------|
| M693T508<br>_2             | Phenyllactic<br>acid                                  | 693.313411 | 507.55  | 289.1678 | 10.3207 | C17H23N03             | C01479 | [M-H]-    | GNPS      | 0.93055 | neg | 1 | 1691908.17 |
| M149T669                   | Phenylpropanoate<br>Phenylpyruvic<br>acid             | 149.05822  | 669.12  | 150.0681 | 17.4678 | C9H10O2               | C05629 | [M-H]-    | mzCloud   | 8.1E-05 | neg | 2 | 14066254.9 |
| M164T442<br>M235T106<br>_2 | Phenytoin                                             | 164.042089 | 442.399 | 164.0473 | 1.346   | C9H8O3<br>C15H12N2O   | C00166 | [M]-      | BioDeepDB | 0.58878 | neg | 1 | 458462.865 |
| M575T743                   | Pheophorbide a                                        | 235.08047  | 105.503 | 252.0899 | 8.4923  | C35H36N4O             | C07443 | [M+H-20]+ | mzCloud   | 0.72523 | pos | 1 | 35787830.1 |
| M273T196                   | Phloretin                                             | 575.272264 | 742.68  | 592.2686 | 19.2924 | 5                     | C18021 | [M+H-20]+ | GNPS      | 1       | pos | 1 | 7903676.37 |
| M437T190<br>M127T772<br>_1 | Phlorizin<br>Phloroglucinol<br>Phospho-               | 273.07314  | 195.791 | 274.0841 | 13.4904 | C15H14O5              | C00774 | [M-H]-    | mzCloud   | 0.72175 | neg | 1 | 522983.475 |
| M426T605<br>M194T241<br>_1 | Phlorizin<br>Phloroglucinol<br>Phospho-<br>anandamide | 437.14558  | 189.571 | 436.1369 | 3.10318 | C21H24O10             | C01604 | [M+H]+    | OTCML     | 0.93396 | pos | 1 | 10931205.6 |
| M426T605<br>M194T241<br>_1 | Phlorizin<br>Phloroglucinol<br>Phospho-<br>anandamide | 127.039579 | 772.206 | 126.0317 | 4.74316 | C6H6O3<br>C22H37N05   | C02183 | [M+H]+    | mzCloud   | 2E-11   | pos | 2 | 369507000  |
| M426T605<br>M194T241<br>_1 | Phlorizin<br>Phloroglucinol<br>Phospho-<br>anandamide | 426.239153 | 605.264 | 426.2409 | 4.09775 | P                     | C19913 | [M]+      | BioDeepDB | 0.99504 | pos | 1 | 1951143.32 |
| M151T75                    | Phosphocreatine<br>Phosphoenolpyruvic<br>acid         | 194.02855  | 241.368 | 211.0358 | 0.95067 | P                     | C02305 | [M+H-20]+ | MoNA      | 0.79423 | pos | 1 | 3957302.04 |
| M151T75                    | Phosphocreatine<br>Phosphoenolpyruvic<br>acid         | 150.974898 | 74.9588 | 167.9824 | 0.4526  | C3H5O6P               | C00074 | [M+H-20]+ | MoNA      | 0.84424 | pos | 1 | 22145752.4 |
| M140T150                   | Phosphonoacetate                                      | 140.070841 | 149.65  | 139.9875 | 17.8244 | C2H5O5P<br>C23H34N3O  | C05682 | [M]+      | BioDeepDB | 0.01557 | pos | 2 | 89712551   |
| M544T329                   | Phosphoramidon<br>Phosphorylcholine                   | 544.215536 | 329.481 | 543.1982 | 18.486  | 10P                   | C00563 | [M+H]+    | MoNA      | 1       | pos | 1 | 6375840.22 |
| M185T499                   | Phosphoramidon<br>Phosphorylcholine                   | 185.080929 | 498.645 | 184.0739 | 1.33489 | C5H15N04P             | C00588 | [M+H]+    | MoNA      | 0.6017  | pos | 1 | 5897637.12 |
| M185T260                   | Phosphoserine                                         | 185.007598 | 259.74  | 185.0089 | 7.03969 | C3H8N06P              | C01005 | [M]+      | BioDeepDB | 0.72475 | pos | 1 | 223568660  |
| M167T592                   | Phthalic acid                                         | 167.1065   | 592.067 | 166.0266 | 1.19316 | C8H6O4                | C01606 | [M+H]+    | BioDeepDB | 0.59348 | pos | 1 | 15249667.5 |
| M284T355                   | Physcion                                              | 284.076669 | 354.719 | 284.0685 | 28.8526 | C16H12O5<br>C15H21N3O | C17045 | [M]-      | OTCML     | 0.99785 | neg | 1 | 2285420.95 |
| M275T827                   | Physostigmine                                         | 275.163591 | 827.271 | 275.1634 | 0.6924  | 2                     | C06535 | [M]+      | GNPS      | 0.5907  | pos | 1 | 21669122   |
| M318T783                   | Phytosphingosine                                      | 318.299179 | 782.558 | 317.293  | 3.42668 | C18H39N03             | C12144 | [M+H]+    | MoNA      | 6.2E-06 | pos | 2 | 234599740  |

|                                                          |                                             |                                       |                               |                                 |                               |                                  |                            |                                                             |                           |                                           |             |                                        |
|----------------------------------------------------------|---------------------------------------------|---------------------------------------|-------------------------------|---------------------------------|-------------------------------|----------------------------------|----------------------------|-------------------------------------------------------------|---------------------------|-------------------------------------------|-------------|----------------------------------------|
| M124T832<br>M293T101<br>_1                               | Picolinic acid<br>Picrotin                  | 124.038505<br>293.096819              | 831.709<br>101.161            | 123.032<br>310.1053             | 6.21603<br>3.57156            | C6H5NO2<br>C15H18O7<br>C11H16N2O | C10164<br>C09528           | [M+] <sup>+</sup><br>[M+H <sub>2</sub> O] <sup>+</sup>      | BioDeepDB<br>mzCloud      | 4.9E-10 pos<br>0.79831 pos                | 2<br>1      | 14214130.6<br>9345787.89               |
| M209T469                                                 | Pilocarpine                                 | 209.127797                            | 469.252                       | 208.1212                        | 3.24675                       | 2<br>C16H18N2O                   | C07474                     | [M+] <sup>+</sup>                                           | mzCloud                   | 0.65988 pos                               | 1           | 7142094.37                             |
| M287T452                                                 | Pilosine                                    | 287.140127                            | 451.804                       | 286.1317                        | 3.86098                       | 3                                | C10610                     | [M+] <sup>+</sup>                                           | MoNA                      | 0.99463 pos                               | 1           | 46630677.1                             |
| M160T51                                                  | Pimelic acid                                | 159.969791                            | 51.1942                       | 160.0736                        | 4.12078                       | C7H12O4<br>C28H29F2N             | C02656                     | [M] <sup>+</sup>                                            | BioDeepDB                 | 3.1E-05 pos                               | 2           | 202749658                              |
| M442T608                                                 | Pimozide                                    | 442.206727                            | 607.625                       | 461.2279                        | 6.29242                       | 30<br>C14H20N2O                  | C07566                     | [M-H <sub>2</sub> O-H] <sup>-</sup>                         | BioDeepDB                 | 0.82129 neg                               | 1           | 10520759.2                             |
| M249T465                                                 | Pindolol                                    | 249.159202                            | 464.668                       | 248.1525                        | 2.30472                       | 2                                | C07445                     | [M+] <sup>+</sup>                                           | mzCloud                   | 0.64273 pos                               | 1           | 3164343.87                             |
| M338T396<br>M355T793<br>_1<br>M130T176<br>_2<br>M86T237_ | Pinolidoxin<br>Pioglitazone<br>Pipelic acid | 338.172143<br>355.110095<br>130.04933 | 396.023<br>793.233<br>175.952 | 338.1729<br>356.1195<br>129.079 | 2.23852<br>5.89191<br>15.1202 | C18H26O6<br>3S<br>C6H11NO2       | C08503<br>C07675<br>C00408 | [M] <sup>-</sup><br>[M-H] <sup>-</sup><br>[M+] <sup>+</sup> | MoNA<br>MoNA<br>BioDeepDB | 0.99119 neg<br>0.66666 neg<br>4.9E-14 pos | 1<br>1<br>2 | 1217319.61<br>265402.961<br>1.9712E+10 |
| 2                                                        | Piperazine                                  | 86.085631                             | 237.171                       | 86.0844                         | 14.2999                       | C4H10N2                          | C07973                     | [M] <sup>+</sup>                                            | MoNA                      | 0.72028 pos                               | 1           | 860896.284                             |
| M86T246                                                  | Piperidine                                  | 86.0960591                            | 246.372                       | 85.0891                         | 3.68058                       | C5H11N                           | C01746                     | [M+] <sup>+</sup>                                           | MoNA                      | 7.3E-10 pos                               | 2           | 1034824377                             |
| M284T577                                                 | Piperine                                    | 284.127783                            | 576.787                       | 285.1365                        | 5.04731                       | C17H19NO3                        | C03882                     | [M-H] <sup>-</sup>                                          | MoNA                      | 0.83125 neg                               | 1           | 654048.298                             |
| M262T698                                                 | Piperocaine                                 | 262.1786                              | 697.952                       | 261.1729                        | 6.00935                       | C16H23NO2                        | C14173                     | [M+] <sup>+</sup>                                           | mzCloud                   | 0.72117 pos                               | 1           | 15394616.5                             |
| M133T372                                                 | Piperonal                                   | 133.027842                            | 372.152                       | 150.0317                        | 26.8786                       | C8H6O3                           | C10812                     | [M+H <sub>2</sub> O] <sup>+</sup>                           | BioDeepDB                 | 0.99982 pos                               | 1           | 9117065.47                             |
| M300T276                                                 | Piplartine                                  | 300.117625                            | 276.414                       | 317.1263                        | 4.13621                       | C17H19NO5<br>C12H20N2O           | C10166                     | [M+H <sub>2</sub> O] <sup>+</sup>                           | BioDeepDB                 | 0.65171 pos                               | 1           | 22895003.1                             |
| M241T175                                                 | Pirbuterol                                  | 241.153331                            | 174.865                       | 240.1474                        | 5.57731                       | 3<br>C19H21N5O                   | C07807                     | [M+] <sup>+</sup>                                           | mzCloud                   | 0.68149 pos                               | 1           | 31673818.2                             |
| M351T492                                                 | Pirenzepine                                 | 351.163836                            | 491.99                        | 351.1695                        | 16.1296                       | 2<br>C13H24N3O                   | C07508                     | [M] <sup>-</sup>                                            | BioDeepDB                 | 0.97262 neg                               | 1           | 663989.684                             |
| M334T500                                                 | Pirimiphos-ethyl                            | 334.138025                            | 500.045                       | 333.1276                        | 9.42302                       | 3PS                              | C19012                     | [M+] <sup>+</sup>                                           | mzCloud                   | 0.88457 pos                               | 1           | 2030248.1                              |

|          |                 |            |         |          |         |           |           |            |            |           |         |     |   |            |  |  |  |  |  |
|----------|-----------------|------------|---------|----------|---------|-----------|-----------|------------|------------|-----------|---------|-----|---|------------|--|--|--|--|--|
| M312T787 |                 |            |         |          |         |           | C15H13N3O |            |            |           |         |     |   |            |  |  |  |  |  |
| _1       | Piroxicam       | 312.04669  | 787.078 | 331.0627 | 7.62548 | 4S        |           | C01608     | [M-H2O-H]- | GNPS      | 0.68913 | neg | 1 | 482716.631 |  |  |  |  |  |
| M639T334 |                 |            |         |          |         |           |           |            |            |           |         |     |   |            |  |  |  |  |  |
| _2       | Plantamajoside  | 639.188131 | 333.655 | 640.2003 | 7.14771 | C29H36O16 | C10485    | Unknown    | OTCML      |           | 0.80052 | neg | 1 | 1067848.87 |  |  |  |  |  |
| M470T704 | Plumieride      | 470.143794 | 704.046 | 470.1424 | 2.96435 | C21H26O12 | C09797    | [M]-       | MoNA       |           | 0.99288 | neg | 1 | 670968.172 |  |  |  |  |  |
| M357T468 | Pluviatolide    | 357.132129 | 467.706 | 356.126  | 3.21262 | C20H20O6  | C21191    | [M+H]+     | MetaDNA    |           | 0.05389 | pos | 2 | 8366695.91 |  |  |  |  |  |
| M414T326 | Podofilox       | 414.1307   | 325.901 | 414.1315 | 1.9316  | C22H22O8  | C10874    | [M]-       | MoNA       |           | 0.9904  | neg | 1 | 14079537.4 |  |  |  |  |  |
| M235T787 | Polygodial      | 235.168037 | 786.569 | 234.162  | 5.27005 | C15H22O2  | C09712    | [M+H]+     | mzCloud    |           | 6.3E-09 | pos | 2 | 31548594   |  |  |  |  |  |
| M137T222 | Polylimonene    | 137.132562 | 222.017 | 136.1252 | 0.62532 | C10H16    | C06078    | [M+H]+     | MoNA       |           | 0.58291 | pos | 1 | 37558883.4 |  |  |  |  |  |
| M226T697 | Porphobilinogen | 226.178078 | 696.575 | 226.0954 | 10.6262 | C10H14N2O |           | C00931     | [M]+       | BioDeepDB | 5.8E-07 | pos | 2 | 112125413  |  |  |  |  |  |
| M329T68  | PQQ             | 329.010713 | 67.6441 | 330.0124 | 16.9867 | C14H6N2O8 | C00113    | [M-H]-     | BioDeepDB  |           | 1       | neg | 1 | 980963.666 |  |  |  |  |  |
| M407T824 | Pravastatin     | 407.238191 | 824.311 | 424.2461 | 1.16616 | C23H36O7  | C01844    | [M+H-H2O]+ | MoNA       |           | 0.5972  | pos | 1 | 7027187.52 |  |  |  |  |  |
| M325T802 | Prazepam        | 325.109502 | 801.685 | 324.1029 | 2.07372 | C19H17ClN |           | C07366     | [M+H]+     | MoNA      | 0.62215 | pos | 1 | 7840638.84 |  |  |  |  |  |
| M312T525 | Praziquantel    | 312.181304 | 524.56  | 312.1838 | 7.99386 | C19H24N2O |           | C07367     | [M]-       | MoNA      | 0.89965 | neg | 1 | 539699.448 |  |  |  |  |  |
| M366T580 | Prazosin        | 366.153753 | 580.22  | 383.1594 | 4.88145 | C19H21N5O |           | C07368     | [M+H-H2O]+ | GNPS      | 0.82688 | pos | 1 | 2262928.37 |  |  |  |  |  |
| M361T110 |                 |            |         |          |         |           |           |            |            |           |         |     |   |            |  |  |  |  |  |
| _2       | Prednisolone    | 361.19458  | 110.047 | 360.1937 | 17.637  | C21H28O5  | C07369    | [M+H]+     | MoNA       |           | 1       | pos | 1 | 33849820.7 |  |  |  |  |  |
| M359T767 | Prednisone      | 359.181938 | 766.742 | 358.178  | 9.29449 | C21H26O5  | C07370    | [M+H]+     | MoNA       |           | 0.06161 | pos | 2 | 7124634.72 |  |  |  |  |  |
| M321T829 |                 |            |         |          |         |           |           |            |            |           |         |     |   |            |  |  |  |  |  |
| _2       | Pregnanediol    | 321.313857 | 828.73  | 320.2715 | 3.79807 | C21H36O2  | C05484    | [M+H]+     | BioDeepDB  |           | 0.63886 | pos | 1 | 11854004.2 |  |  |  |  |  |
| M299T562 | Pregnenolone    | 299.23556  | 561.955 | 316.2402 | 9.33747 | C21H32O2  | C01953    | [M+H-H2O]+ | BioDeepDB  |           | 0.88758 | pos | 1 | 69015067.8 |  |  |  |  |  |
| M87T263  | Prenol          | 87.0803686 | 262.529 | 86.0732  | 1.23383 | C5H10O    | C01390    | [M+H]+     | BioDeepDB  |           | 0.59447 | pos | 1 | 13575175.1 |  |  |  |  |  |
| M314T616 | Pretazettine    | 314.13675  | 615.594 | 331.142  | 6.95307 | C18H21NO5 | C08536    | [M+H-H2O]+ | mzCloud    |           | 0.66464 | pos | 1 | 107730631  |  |  |  |  |  |

|          |                                 |            |         |          |         |                        |        |                        |           |         |       |   |            |
|----------|---------------------------------|------------|---------|----------|---------|------------------------|--------|------------------------|-----------|---------|-------|---|------------|
| M259T809 | Primaquine                      | 259.167815 | 808.678 | 259.1685 | 2.64186 | C15H21N3O<br>C13H19NO4 | C07627 | [M] <sup>+</sup>       | MoNA      | 0.62258 | pos   | 1 | 5191621.96 |
| M285T301 | Probenecid                      | 285.101899 | 300.782 | 285.1035 | 5.61397 | S                      | C07372 | [M] <sup>+</sup>       | GNPS      | 0.68592 | pos   | 1 | 131720720  |
| M237T310 | Procaine                        | 237.160897 | 310.075 | 236.1525 | 4.72601 | 2                      |        | [M+H] <sup>+</sup>     | MoNA      | 0.99601 | pos   | 1 | 15291926.8 |
| _2       |                                 |            |         |          |         |                        |        |                        |           |         |       |   |            |
| M221T830 | Proc carbazine                  | 221.152718 | 830.193 | 221.1528 | 0.37161 | C12H19N3O<br>C12H19N3O | C07402 | [M] <sup>+</sup>       | MoNA      | 0.5857  | pos   | 1 | 5312942.91 |
| M240T176 | Proc carbazine<br>hydrochloride | 240.122256 | 175.952 | 257.1295 | 0.7906  | . HC1<br>C20H24ClN     | C07376 | [M+H-H2O] <sup>+</sup> | BioDeepDB | 0.98706 | pos   | 1 | 514540244  |
| M356T304 | Prochlorperazine                | 356.131205 | 303.513 | 373.1379 | 2.07641 | 3S                     | C07403 | [M+H-H2O] <sup>+</sup> | mzCloud   | 0.65602 | pos   | 1 | 10432959.6 |
| M198T724 | Procollagen 5-                  | 197.806616 | 724.158 | NULL     | 7.21885 | R2                     |        | [M-H] <sup>-</sup>     | BioDeepDB | 0.99854 | neg   | 1 | 7160291.96 |
| M579T659 | hydroxy-L-lysine                |            |         |          |         |                        |        |                        |           |         |       |   |            |
| _2       | Procyanidin B2                  | 579.154243 | 658.953 | 578.1424 | 7.84105 | C30H26O12              | C17639 | [M+H] <sup>+</sup>     | MoNA      | 0.79702 | pos   | 1 | 3905582.44 |
| M865T173 | Procyanidin C1                  | 865.222535 | 173.092 | 866.2058 | 27.7348 | C45H38O18              | C17624 | [M-H] <sup>-</sup>     | MoNA      |         | 1 neg | 1 | 2312055.35 |
| M288T794 | Procyclidine                    | 288.238727 | 793.649 | 287.2249 | 22.645  | C19H29NO<br>C13H11Cl2  | C07378 | [M+H] <sup>+</sup>     | BioDeepDB | 0.81878 | pos   | 1 | 5653408.72 |
| M266T201 | Procymidone                     | 266.012694 | 200.766 | 283.0167 | 12.8855 | N02                    | C10986 | [M+H-H2O] <sup>+</sup> | MoNA      | 0.99996 | pos   | 1 | 3094195.69 |
| M333T239 | Prodiamine                      | 333.107119 | 238.605 | 350.1202 | 16.9516 | 404                    | C18884 | [M+H-H2O] <sup>+</sup> | mzCloud   | 0.81048 | pos   | 1 | 669989.797 |
| M355T32  | Profenofos                      | 354.928585 | 32.4171 | 371.9351 | 2.58852 | 103PS                  | C18404 | [M+H-H2O] <sup>+</sup> | mzCloud   | 0.63109 | pos   | 1 | 5402395.01 |
| M314T642 | Progesterone                    | 314.230487 | 642.211 | 314.2246 | 18.734  | C21H30O2<br>C11H16ClN  | C00410 | [M] <sup>+</sup>       | MoNA      | 0.90766 | pos   | 1 | 8021976.34 |
| M236T278 | Proguanil                       | 236.102093 | 277.699 | 253.1094 | 0.53794 | 5                      | C07631 | [M+H-H2O] <sup>+</sup> | BioDeepDB | 0.6168  | pos   | 1 | 2415477.08 |
| M267T583 | Promazine                       | 267.119345 | 583.068 | 284.1347 | 29.6546 | C17H20N2S              | C07379 | [M+H-H2O] <sup>+</sup> | BioDeepDB | 0.97653 | pos   | 1 | 8523742.08 |
| M284T243 | Promethazine                    | 284.134076 | 242.682 | 284.1347 | 2.19504 | C17H20N2S              | C07404 | [M] <sup>+</sup>       | MoNA      | 0.60762 | pos   | 1 | 1126710.72 |
| M208T388 | Prometon                        | 208.154974 | 387.763 | 225.159  | 16.3722 | C10H19N5O              | C14186 | [M+H-H2O] <sup>+</sup> | MoNA      |         | 1 pos | 1 | 46447434.1 |
| M342T522 | Propafenone                     | 342.201119 | 522.177 | 341.1991 | 15.3442 | C21H27NO3              | C07381 | [M+H] <sup>+</sup>     | MoNA      | 0.9568  | pos   | 1 | 14629031.4 |

|                      |                                |            |         |          |         |                        |        |                        |           |         |     |   |            |
|----------------------|--------------------------------|------------|---------|----------|---------|------------------------|--------|------------------------|-----------|---------|-----|---|------------|
| M368T516             | Propantheline                  | 368.212773 | 516.214 | 368.2226 | 25.058  | C23H30N03              | C07506 | [M+H] <sup>+</sup>     | BioDeepDB | 0.04972 | pos | 2 | 8473108.27 |
| M212T287             | Propazine                      | 212.10199  | 287.148 | 229.1094 | 0.11205 | C9H16C1N5<br>C10H20N04 | C14312 | [M+H-H2O] <sup>+</sup> | BioDeepDB | 0.98475 | pos | 1 | 53072375.9 |
| M280T438<br>M340T143 | Propetamphos                   | 280.081604 | 437.734 | 281.0851 | 13.4968 | PS<br>C20H24N2O        | C18669 | [M-H] <sup>-</sup>     | BioDeepDB | 0.99997 | neg | 1 | 2279046.18 |
| _2                   | Propiomazine                   | 340.160008 | 142.85  | 340.1609 | 2.62115 | S                      | C07405 | [M] <sup>+</sup>       | BioDeepDB | 0.66009 | pos | 1 | 7718931.84 |
| M339T668             | Propoxyphene                   | 339.214448 | 667.609 | 339.2198 | 15.7778 | C22H29N02              | C07406 | [M] <sup>+</sup>       | MoNA      | 0.867   | pos | 1 | 8999308.43 |
| M260T219             | Propranolol                    | 260.159688 | 219.233 | 259.1572 | 18.403  | C16H21N02              | C07407 | [M+H] <sup>+</sup>     | mzCloud   | 0.80336 | pos | 1 | 16410487.8 |
| M337T703             | Prostaglandin B1               | 337.236033 | 703.35  | 336.2301 | 3.98322 | C20H32O4               | C00959 | [M+H] <sup>+</sup>     | mzCloud   | 0.67605 | pos | 1 | 2149509.71 |
| M337T821             | Prostaglandin D1               | 337.233688 | 821.334 | 354.2406 | 1.54902 | C20H34O5               | C06438 | [M+H-H2O] <sup>+</sup> | BioDeepDB | 0.60292 | pos | 1 | 29526018.4 |
| M333T836<br>M353T594 | Prostaglandin D3               | 333.200971 | 836.034 | 350.2093 | 2.68747 | C20H30O5               | C13802 | [M+H-H2O] <sup>+</sup> | BioDeepDB | 0.60325 | pos | 1 | 23952204.4 |
| _2                   | Prostaglandin E1               | 353.230584 | 593.841 | 354.2406 | 7.68825 | C20H34O5               | C04741 | [M-H] <sup>-</sup>     | BioDeepDB | 0.08079 | neg | 2 | 1021825.37 |
| M355T829             | F1a<br>Prostaglandin           | 355.246819 | 829.321 | 356.2563 | 6.13809 | C20H36O5               | C06475 | [M-H] <sup>-</sup>     | BioDeepDB | 0.64132 | neg | 1 | 1028736.69 |
| M355T836             | F2a                            | 355.280951 | 836.034 | 354.2406 | 3.66191 | C20H34O5               | C00639 | [M+H] <sup>+</sup>     | BioDeepDB | 2.4E-08 | pos | 2 | 20406639.2 |
| M351T785             | Prostaglandin G2               | 351.212608 | 785.136 | 368.2199 | 0.4051  | C20H32O6               | C05956 | [M+H-H2O] <sup>+</sup> | BioDeepDB | 0.61782 | pos | 1 | 45956113.2 |
| M335T623             | Prostaglandin H2               | 335.220984 | 623.11  | 352.225  | 3.62686 | C20H32O5               | C00427 | [M+H-H2O] <sup>+</sup> | BioDeepDB | 0.77885 | pos | 1 | 3607589.16 |
| M315T828             | Prostaglandin J2               | 315.195239 | 827.821 | 334.2144 | 2.44646 | C20H30O4               | C05957 | [M-H2O-H] <sup>-</sup> | BioDeepDB | 0.60682 | neg | 1 | 723258.341 |
| M252T203             | Prosulfocarb<br>Protocatechuic | 252.143478 | 203.36  | 251.1344 | 7.14664 | C14H21N0S              | C18760 | [M+H] <sup>+</sup>     | mzCloud   | 0.82423 | pos | 1 | 3327033.54 |
| M153T102<br>M354T104 | acid                           | 153.018347 | 101.563 | 154.0266 | 0.33709 | C7H6O4                 | C00230 | [M-H] <sup>-</sup>     | BioDeepDB | 7.2E-09 | neg | 2 | 93237335.3 |
| _2                   | Protopine                      | 354.137358 | 104.493 | 353.1263 | 10.6146 | C20H19N05<br>C34H34N4O | C05189 | [M+H] <sup>+</sup>     | OTCML     | 0.75033 | pos | 1 | 19292888.4 |
| M562T737             | IX                             | 562.25853  | 737.198 | 562.258  | 0.94188 | 4                      | C02191 | [M] <sup>+</sup>       | GNPS      | 0.65887 | pos | 1 | 7167188.86 |

|          |                  |            |         |          |         |    |           |           |        |            |           |         |     |   |            |  |  |  |  |
|----------|------------------|------------|---------|----------|---------|----|-----------|-----------|--------|------------|-----------|---------|-----|---|------------|--|--|--|--|
| M774T776 |                  |            |         |          |         |    |           | C41H63N01 |        |            |           |         |     |   |            |  |  |  |  |
| _2       | Protoveratrine A | 774.39769  | 776.391 | 793.4249 | 11.3891 | 4  |           | C41H63N01 | C10815 | [M-H2O-H]- | MoNA      | 0.99986 | neg | 1 | 318210.88  |  |  |  |  |
| M792T477 | Protoveratrine B | 792.393919 | 476.554 | 809.4198 | 23.2803 | 5  |           | C41H63N01 | C10816 | [M+H-20]+  | BioDeepDB | 1       | pos | 1 | 1601599.96 |  |  |  |  |
| M295T545 | Prunasin         | 295.100739 | 545.203 | 295.1056 | 16.4719 |    | C14H17N06 |           | C00844 | [M]+       | MetaDNA   | 0.00026 | pos | 2 | 136695564  |  |  |  |  |
| M248T364 | Pseudoivalin     | 248.144894 | 363.58  | 248.1412 | 14.8881 |    | C15H2003  |           | C09534 | [M]+       | MetaDNA   | 0.01632 | pos | 2 | 3613915.76 |  |  |  |  |
| M243T264 | Pseudouridine    | 243.062832 | 263.845 | 244.0695 | 2.35251 |    | C9H12N206 |           | C02067 | [M-H]-     | MoNA      | 0.62449 | neg | 1 | 368929.481 |  |  |  |  |
| M154T50  | psi-Pelletierine | 154.119317 | 50.041  | 153.1154 | 21.5634 |    | C9H15N0   |           | C10865 | [M+H]+     | MoNA      | 0.90887 | pos | 1 | 3139287.31 |  |  |  |  |
| M205T381 | Psilocin         | 205.132831 | 380.63  | 204.1263 | 3.63125 |    | C12H16N20 |           | C08312 | [M+H]+     | mzCloud   | 0.61628 | pos | 1 | 3647079.96 |  |  |  |  |
| M284T317 | Psilocybin       | 284.09422  | 317.199 | 284.0926 | 5.70408 | 4P | C12H17N20 |           | C07576 | [M]+       | mzCloud   | 0.71905 | pos | 1 | 7498293.83 |  |  |  |  |
| M337T832 | Psoralidin       | 337.109956 | 831.709 | 336.0998 | 8.54257 |    | C20H1605  |           | C10523 | [M+H]+     | MoNA      | 0.66293 | pos | 1 | 18446214.9 |  |  |  |  |
| M163T243 | Pterin           | 163.0499   | 242.682 | 163.0494 | 3.06378 |    | C6H5N50   |           | C00715 | [M]+       | BioDeepDB | 0.61595 | pos | 1 | 3892893.81 |  |  |  |  |
| M256T393 | Pterostilbene    | 256.111249 | 392.715 | 256.1099 | 5.2656  |    | C16H1603  |           | C10287 | [M]+       | GNPS      | 0.99672 | pos | 1 | 742711115  |  |  |  |  |
| M415T176 | Puerarin         | 415.106256 | 176.104 | 416.1107 | 5.91667 |    | C21H2009  |           | C10524 | Unknown    | OTCML     | 0.80888 | neg | 1 | 6695602.7  |  |  |  |  |
| M135T545 | Pulegone         | 135.115423 | 545.203 | 152.1201 | 20.4079 |    | C10H160   |           | C09893 | [M+H-20]+  | mzCloud   | 9.8E-05 | pos | 2 | 30952038.4 |  |  |  |  |
| M512T519 | Pumiloside       | 512.174996 | 519.257 | 512.1795 | 8.79398 | 9  | C26H28N20 |           | C16723 | [M]+       | GNPS      | 0.99933 | pos | 1 | 4423950.47 |  |  |  |  |
| M120T509 | Purine           | 120.043919 | 509.11  | 120.0436 | 2.66107 |    | C5H4N4    |           | C15587 | [M]-       | GNPS      | 0.62766 | neg | 1 | 346498.088 |  |  |  |  |
| M452T626 | Puromycin        | 452.196018 | 626.183 | 471.223  | 19.001  | 5  | C22H29N70 |           | C01610 | [M-H2O-H]- | MoNA      | 1       | neg | 1 | 1323587.34 |  |  |  |  |
| M239T346 | Purpurin         | 239.027544 | 345.848 | 256.0372 | 9.29483 |    | C14H805   |           | C10395 | [M+H-20]+  | mzCloud   | 0.82844 | pos | 1 | 7140633.19 |  |  |  |  |
| M217T443 | Pymetrozine      | 217.096424 | 443.256 | 217.0964 | 0.11167 |    | C10H11N50 |           | C18590 | [M]+       | mzCloud   | 0.64815 | pos | 1 | 462138082  |  |  |  |  |
| M193T167 | Pyocyanine       | 193.071493 | 166.613 | 210.0793 | 1.93348 |    | C13H10N20 |           | C01748 | [M+H-20]+  | GNPS      | 0.99041 | pos | 1 | 4304545.83 |  |  |  |  |

|            |                            | C14H20N3O  |         |          |         |             |        |                       |           |             |   |            |
|------------|----------------------------|------------|---------|----------|---------|-------------|--------|-----------------------|-----------|-------------|---|------------|
| M356T84    | Pyrazophos                 | 356.08513  | 83.5661 | 373.0861 | 18.1536 | 5PS         | C18761 | [M+H-2H] <sup>+</sup> | MoNA      | 1 pos       | 1 | 6161981.11 |
| M287T343   | Pyrethrosin                | 287.124319 | 342.819 | 306.1467 | 13.9007 | C17H22O5    | C09536 | [M-2H-H] <sup>-</sup> | BioDeepDB | 0.99998 neg | 1 | 1331049.17 |
| M181T331   | Pyridostigmine             | 181.096692 | 330.809 | 181.0977 | 5.5679  | C9H13N2O2   | C07410 | [M] <sup>+</sup>      | mzCloud   | 0.64462 pos | 1 | 40083683   |
| M168T133   | Pyridoxal                  | 168.064941 | 133.259 | 167.0582 | 3.18241 | C8H9NO3     | C00250 | [M+H] <sup>+</sup>    | mzCloud   | 8.4E-07 pos | 2 | 95326230   |
| M248T411   | Pyridoxal 5'-phosphate     | 248.138532 | 410.542 | 247.0246 | 0.85194 | C8H10NO6P   | C00018 | [M+H] <sup>+</sup>    | BioDeepDB | 0.58494 pos | 1 | 8082713.06 |
| M169T286   | Pyridoxamine               | 169.096682 | 285.9   | 168.0899 | 2.91883 | C8H12N2O2   | C00534 | [M+H] <sup>+</sup>    | mzCloud   | 0.62946 pos | 1 | 7834189.7  |
| M231T215   | Pyridoxamine 5'-phosphate  | 231.04937  | 215.068 | 248.0562 | 2.61616 | C8H13N2O5P  | C00647 | [M+H-2H] <sup>+</sup> | BioDeepDB | 0.60637 pos | 1 | 5276141.4  |
| M170T169   | Pyridoxine                 | 170.080326 | 169.221 | 169.0739 | 3.65037 | C8H11NO3    | C00314 | [M+H] <sup>+</sup>    | BioDeepDB | 2.9E-05 pos | 2 | 122332023  |
| M319T232   | Pyrifitalid                | 319.06553  | 231.773 | 318.0674 | 28.6646 | C15H14N2O4S | C18485 | [M+H] <sup>+</sup>    | MoNA      | 1 pos       | 1 | 10608205.1 |
| M249T295   | Pyrimethamine              | 249.08589  | 295.356 | 248.0829 | 17.2081 | C12H13C1N4  | C07391 | [M+H] <sup>+</sup>    | mzCloud   | 0.89496 pos | 1 | 2688050.64 |
| M199T639   | Pyrimethanil               | 199.109786 | 639.219 | 199.1109 | 5.59547 | C12H13N3    | C11180 | [M] <sup>+</sup>      | MoNA      | 0.78832 pos | 1 | 23310667   |
| M81T651    | Pyrimidine                 | 81.0331302 | 650.898 | 80.0374  | 6.54893 | C4H4N2      | C00396 | [M+H] <sup>+</sup>    | BioDeepDB | 0.63677 pos | 1 | 5373541.16 |
| M304T378_1 | Pyriproxyfen               | 304.128201 | 377.704 | 321.1365 | 2.84583 | C20H19NO3   | C18605 | [M+H-2H] <sup>+</sup> | BioDeepDB | 0.99262 pos | 1 | 13788270.8 |
| M125T95    | Pyrogallol                 | 125.02284  | 95.2383 | 126.0317 | 12.4763 | C6H6O3      | C01108 | Unknown               | OTCML     | 1.2E-10 neg | 2 | 138850615  |
| M128T91_2  | Pyroglutamic acid          | 128.032721 | 90.9026 | 129.0426 | 12.0905 | C5H7NO3     | C01879 | [M-H] <sup>-</sup>    | BioDeepDB | 3.7E-09 neg | 2 | 6114417256 |
| M159T255_1 | Pyrophosphate              | 158.924182 | 255.113 | 177.9432 | 3.95355 | H4P2O7      | C00013 | [M-2H-H] <sup>-</sup> | BioDeepDB | 0.63376 neg | 1 | 4258921.81 |
| M174T359   | Pyroquilon                 | 174.094414 | 359.32  | 173.0841 | 17.4483 | C11H11NO    | C18487 | [M+H] <sup>+</sup>    | mzCloud   | 0.83511 pos | 1 | 10607912.4 |
| M110T629   | Pyrrole-2-carboxylic acid  | 110.022512 | 629.272 | 111.032  | 20.1073 | C5H5NO2     | C05942 | [M-H] <sup>-</sup>    | BioDeepDB | 1.4E-07 neg | 2 | 6689158.5  |
| M129T54    | Pyrrolidonecarboxylic acid | 128.958064 | 53.948  | 129.0426 | 2.63855 | C5H7NO3     | C02237 | [M] <sup>-</sup>      | BioDeepDB | 0.60992 neg | 1 | 767827.454 |



|           |                  |            |         |          |         |           |        |                        |           |         |     |   |            |
|-----------|------------------|------------|---------|----------|---------|-----------|--------|------------------------|-----------|---------|-----|---|------------|
| M88T132   | Pyruvic acid     | 88.0752762 | 131.949 | 88.016   | 9.38989 | C3H4O3    | C00022 | [M] <sup>+</sup>       | BioDeepDB | 3.2E-10 | pos | 2 | 132743579  |
| M265T635  | Qing Hau Sau     | 265.142019 | 635.022 | 282.1467 | 10.3834 | C15H22O5  | C09538 | [M+H-H2O] <sup>+</sup> | mzCloud   | 1.8E-05 | pos | 2 | 10025947.5 |
| M389T824  | Quassin          | 389.196685 | 824.311 | 388.1886 | 2.07797 | C22H28O6  | C08778 | [M+H] <sup>+</sup>     | MoNA      | 0.60583 | pos | 1 | 37513828.5 |
| M301T713  | Quercetin        | 301.034307 | 713.292 | 302.0427 | 3.55335 | C15H10O7  | C00389 | [M-H] <sup>-</sup>     | MoNA      | 2.6E-11 | neg | 2 | 5294085.53 |
| M595T475  | Quercetin 3-O-   |            |         |          |         |           |        |                        |           |         |     |   |            |
| _1        | [beta-D-xylosyl- | 595.112846 | 474.888 | 596.1377 | 29.5362 | C26H28O16 | C12637 | [M-H] <sup>-</sup>     | MetaDNA   | 0.05516 | neg | 2 | 11743104.2 |
|           | Quercetin 3-O-   |            |         |          |         |           |        |                        |           |         |     |   |            |
| M463T508  | glucoside        | 463.086496 | 507.55  | 464.0955 | 3.73159 | C21H20O12 | C05623 | [M-H] <sup>-</sup>     | mzCloud   | 6.1E-11 | neg | 2 | 7553445.14 |
| M383T675  |                  |            |         |          |         | C21H25N3O |        |                        |           |         |     |   |            |
| _1        | Quetiapine       | 383.168161 | 675.322 | 383.1667 | 3.81365 | C23H30C1N | C07397 | [M] <sup>-</sup>       | BioDeepDB | 0.73888 | neg | 1 | 5264536.54 |
| M400T610  | Quinacrine       | 400.213822 | 609.592 | 399.2077 | 2.88345 | 30        | C07339 | [M+H] <sup>+</sup>     | BioDeepDB | 0.78096 | pos | 1 | 2244410.07 |
| M174T471  | Quinaldic acid   | 174.112078 | 470.602 | 173.0477 | 17.0754 | C10H7N02  | C06325 | [M+H] <sup>+</sup>     | BioDeepDB | 0.61442 | pos | 2 | 11247754.4 |
|           |                  |            |         |          |         | C12H15N2O |        |                        |           |         |     |   |            |
| M281T117  | Quinalphos       | 281.050656 | 116.689 | 298.0541 | 14.1954 | 3PS       | C11030 | [M+H-H2O] <sup>+</sup> | BioDeepDB | 0.99999 | pos | 1 | 4936405.48 |
|           |                  |            |         |          |         | C25H30N2O |        |                        |           |         |     |   |            |
| M439T588  | Quinapril        | 439.228885 | 587.521 | 438.2155 | 13.9079 | 5         | C07398 | [M+H] <sup>+</sup>     | mzCloud   | 0.70953 | pos | 1 | 8824955.97 |
| M191T84_2 | Quinate          | 191.053307 | 83.9405 | 192.0634 | 10.5141 | C7H12O6   | C00296 | [M-H] <sup>-</sup>     | BioDeepDB | 2.9E-13 | neg | 2 | 1826454100 |
| M364T698  | Quinestrol       | 364.242531 | 697.952 | 364.2402 | 6.39941 | C25H32O2  | C07619 | [M] <sup>+</sup>       | BioDeepDB | 0.74911 | pos | 1 | 35961592.8 |
| M146T124  | Quinic acid      | 146.092042 | 124.487 | 163.0997 | 1.53471 | C10H13NO  | C06746 | [M+H-H2O] <sup>+</sup> | GNPS      | 0.66284 | pos | 1 | 127072579  |
|           |                  |            |         |          |         | C20H24N2O |        |                        |           |         |     |   |            |
| M324T801  | Quinine          | 324.185432 | 800.683 | 324.1838 | 5.03553 | 2         | C06526 | [M] <sup>-</sup>       | BioDeepDB | 0.65227 | neg | 1 | 14800691.2 |
| M129T148  | Quinoline        | 128.95073  | 148.117 | 129.0578 | 0.00164 | C9H7N     | C06413 | [M] <sup>+</sup>       | BioDeepDB | 0.57558 | pos | 1 | 15402669   |
| M167T354  | Quinolinic acid  | 167.012499 | 353.978 | 167.0219 | 2.45406 | C7H5N04   | C03722 | [M] <sup>+</sup>       | BioDeepDB | 2.9E-06 | pos | 2 | 149129648  |
| M109T188  | Quinone          | 109.028238 | 188.126 | 108.0211 | 1.26661 | C6H4O2    | C00472 | [M+H] <sup>+</sup>     | MoNA      | 0.61277 | pos | 1 | 100634694  |
|           |                  |            |         |          |         | C15H8C12F |        |                        |           |         |     |   |            |
| M307T121  | Quinoxifen       | 306.9963   | 120.525 | 306.9967 | 1.30427 | NO        | C18892 | [M] <sup>+</sup>       | MoNA      | 0.98865 | pos | 1 | 52721381.3 |

|                      |                             |            |         |          |         |                        |        |                        |           |         |     |   |            |
|----------------------|-----------------------------|------------|---------|----------|---------|------------------------|--------|------------------------|-----------|---------|-----|---|------------|
| M239T475             | R-Salbutamol                | 239.150077 | 475.007 | 239.1521 | 8.45993 | C13H21N03<br>C18H21N3O | C11770 | [M] <sup>+</sup>       | mzCloud   | 0.74393 | pos | 1 | 5878682.45 |
| M360T401             | Rabeprazole                 | 360.142758 | 400.59  | 359.1304 | 14.1098 | 3S                     | C07864 | [M+H] <sup>+</sup>     | MoNA      | 0.98916 | pos | 1 | 5737287.44 |
| M150T381<br>M503T146 | Racemethionine              | 150.056547 | 380.63  | 149.051  | 11.5213 | C5H11N02S              | C01733 | [M+H] <sup>+</sup>     | MoNA      | 0.81348 | pos | 1 | 4536039.78 |
| _2                   | Raffinose                   | 503.168837 | 146.08  | 504.169  | 14.066  | C18H32O16<br>C28H27N04 | C00492 | [M-H] <sup>-</sup>     | OTCML     | 3.6E-11 | neg | 2 | 30617820.7 |
| M456T701             | Raloxifene                  | 456.166474 | 700.758 | 473.1661 | 17.1165 | S<br>C21H22N4O         | C07228 | [M+H-H2O] <sup>+</sup> | MoNA      | 0.85181 | pos | 1 | 24658145.2 |
| M439T826             | Raltitrexed                 | 439.107354 | 826.333 | 458.126  | 0.58373 | 6S<br>C13H22N4O        | C11372 | [M-H2O-H] <sup>-</sup> | MoNA      | 0.59033 | neg | 1 | 2305549.37 |
| M297T104             | Ranitidine                  | 297.135745 | 104.493 | 314.1413 | 6.45551 | 3S<br>C27H36N2O        | C07233 | [M+H-H2O] <sup>+</sup> | MoNA      | 0.99796 | pos | 1 | 43419963.1 |
| M435T515<br>M617T668 | Repaglinide                 | 435.257534 | 514.727 | 452.2675 | 5.81702 | 4<br>C35H42N2O         | C07670 | [M+H-H2O] <sup>+</sup> | mzCloud   | 0.66735 | pos | 1 | 3261637.01 |
| _2                   | Rescinnamine                | 617.28732  | 667.609 | 634.289  | 9.32192 | 9<br>C33H40N2O         | C06540 | [M+H-H2O] <sup>+</sup> | GNPS      | 0.8057  | pos | 1 | 33083063.4 |
| M609T659<br>_4       | Reserpine                   | 609.283279 | 658.953 | 608.2734 | 4.27161 | 9                      | C06539 | [M+H] <sup>+</sup>     | mzCloud   | 0.7276  | pos | 1 | 10819182.3 |
| M227T786             | Resveratrol                 | 227.073533 | 785.593 | 228.0786 | 9.3934  | C14H12O3               | C03582 | [M-H] <sup>-</sup>     | BioDeepDB | 0.70825 | neg | 1 | 4487910.99 |
| M267T562             | Retinal                     | 267.209578 | 561.955 | 284.214  | 11.2732 | C20H28O                | C00376 | [M+H-H2O] <sup>+</sup> | mzCloud   | 0.8955  | pos | 1 | 10104074.7 |
| M285T767<br>M524T823 | Retinol                     | 285.064737 | 767.145 | 286.2297 | 0.80129 | C20H30O                | C00473 | [M-H] <sup>-</sup>     | BioDeepDB | 6.6E-07 | neg | 2 | 2766593.94 |
| _1                   | Retinyl<br>palmitate        | 524.3557   | 822.881 | 524.4593 | 8.87634 | C36H60O2               | C02588 | [M] <sup>+</sup>       | BioDeepDB | 0.72921 | pos | 1 | 317811502  |
| M401T358             | Rhapontin                   | 401.120212 | 357.746 | 420.142  | 8.54988 | C21H24O9               | C10288 | [M-H2O-H] <sup>-</sup> | OTCML     | 0.84931 | neg | 1 | 709009.84  |
| M267T139             | Rhein                       | 267.027936 | 138.766 | 284.0321 | 12.2443 | C15H8O6                | C10401 | [M+H-H2O] <sup>+</sup> | mzCloud   | 0.98447 | pos | 1 | 4281843.22 |
| M153T69              | Ribitol                     | 152.994487 | 69.2834 | 152.0685 | 0.93045 | C5H12O5<br>C17H20N4O   | C00474 | [M+H] <sup>+</sup>     | BioDeepDB | 2.6E-07 | pos | 2 | 4757729.42 |
| M377T451             | Riboflavin                  | 377.143827 | 450.503 | 376.1383 | 3.70818 | 6<br>C5H12O11P         | C00255 | [M+H] <sup>+</sup>     | BioDeepDB | 2.7E-09 | pos | 2 | 13165622.9 |
| M309T733             | Ribose 1,5-<br>bisphosphate | 309.170294 | 733.352 | 309.9855 | 12.4188 | 2                      | C01151 | [M-H] <sup>-</sup>     | BioDeepDB | 0.74211 | neg | 1 | 2151878.2  |

|                            |                 |            |         |          |         |     |                        |        |                        |           |         |     |   |            |
|----------------------------|-----------------|------------|---------|----------|---------|-----|------------------------|--------|------------------------|-----------|---------|-----|---|------------|
| M455T82                    | Ribostamycin    | 455.233629 | 82.0569 | 454.2275 | 2.50463 | 10  | C17H34N4O              | C01759 | [M+H] <sup>+</sup>     | MoNA      | 0.99184 | pos | 1 | 2972158.55 |
| M163T811                   | Ricinine        | 163.049563 | 811.292 | 164.0586 | 10.6629 |     | C8H8N2O2<br>C43H58N4O  | C01526 | [M-H] <sup>-</sup>     | MoNA      | 0.69992 | neg | 1 | 9141790.74 |
| M821T566                   | Rifampicin      | 821.37041  | 566.042 | 822.4051 | 7.78724 | 12  | C37H47N01              | C06688 | [M-H] <sup>-</sup>     | BioDeepDB | 0.72725 | neg | 1 | 1434526.73 |
| M697T486<br>M180T237<br>_2 | Rifamycin       | 697.304413 | 485.784 | 697.3098 | 7.72533 | 2   |                        | C12044 | [M] <sup>-</sup>       | BioDeepDB | 0.99884 | neg | 1 | 578247.942 |
| M432T598<br>_1             | Rilmenidine     | 180.123254 | 237.171 | 180.1263 | 16.7077 |     | C10H16N2O<br>C14H17N5O | C11120 | [M] <sup>+</sup>       | mzCloud   | 0.85715 | pos | 1 | 9622144.25 |
| M386T603                   | Rimsulfuron     | 432.058949 | 598.125 | 431.0569 | 12.0972 |     | 7S2<br>C21H31N5O       | C10952 | [M+H] <sup>+</sup>     | MoNA      | 0.99992 | pos | 1 | 1096125.42 |
| M288T365                   | Risperidone     | 386.250718 | 602.513 | 385.2478 | 11.2183 | 2   |                        | C06861 | [M+H] <sup>+</sup>     | MoNA      | 0.87626 | pos | 1 | 1689465.8  |
| M703T477                   | Ritodrine       | 288.161809 | 365.061 | 287.1521 | 8.44417 |     | C17H21N03<br>C37H48N6O | C07239 | [M+H] <sup>+</sup>     | mzCloud   | 0.93628 | pos | 1 | 12274937.1 |
| M251T751                   | Ritonavir       | 703.312922 | 476.554 | 720.3128 | 10.7427 |     | 5S2<br>C14H22N2O       | C07240 | [M+H-H2O] <sup>+</sup> | MoNA      | 0.94966 | pos | 1 | 3193399.32 |
| M261T582                   | Rivastigmine    | 251.180817 | 751.333 | 250.1681 | 21.5515 | 2   |                        | C11766 | [M+H] <sup>+</sup>     | MoNA      | 0.84496 | pos | 1 | 39060699.3 |
| M274T475<br>M532T759<br>_1 | Ropinirole      | 261.194925 | 581.625 | 260.1889 | 4.49846 |     | C16H24N2O              | C07564 | [M+H] <sup>+</sup>     | BioDeepDB | 9E-07   | pos | 2 | 735987.253 |
| M359T427                   | Ropivacaine     | 274.201249 | 475.007 | 274.2045 | 11.8557 |     | C17H26N2O              | C07532 | [M] <sup>+</sup>       | MoNA      | 0.95761 | pos | 1 | 4019980.51 |
| M394T643                   | Roridin A       | 532.26395  | 759.428 | 532.2672 | 6.10562 |     | C29H40O9               | C09716 | [M] <sup>-</sup>       | MoNA      | 0.99764 | neg | 1 | 426911.516 |
| M837T660                   | Rosmarinic acid | 359.078633 | 426.913 | 360.0845 | 3.87598 |     | C18H16O8               | C01850 | [M-H] <sup>-</sup>     | OTCML     | 1.9E-10 | neg | 2 | 5389639.27 |
| M364T741                   | Rotenone        | 394.149013 | 643.166 | 394.1416 | 18.8076 |     | C23H22O6<br>C41H76N2O  | C07593 | [M] <sup>-</sup>       | BioDeepDB | 0.9074  | neg | 1 | 3414258.06 |
| M413T418                   | Roxithromycin   | 836.504716 | 660.455 | 836.5246 | 23.7703 | 15  | C17H18FN3              | C13173 | [M] <sup>+</sup>       | MoNA      | 0.92367 | pos | 1 | 9017785.86 |
| M270T592                   | Rufloxacin      | 364.120537 | 741.302 | 363.1053 | 21.8646 | 03S |                        | C11240 | [M+H] <sup>+</sup>     | MoNA      | 0.85503 | pos | 1 | 4376311.01 |
| M413T418                   | Ruscogenin      | 413.300928 | 417.676 | 430.3083 | 0.12702 |     | C27H42O4               | C08909 | [M+H-H2O] <sup>+</sup> | OTCML     | 0.85689 | pos | 1 | 2247463.53 |
| M270T592                   | Rutaecarpine    | 270.095699 | 592.067 | 287.1059 | 10.2454 |     | C18H13N3O              | C09238 | [M+H-H2O] <sup>+</sup> | MoNA      | 0.87472 | pos | 1 | 6175202.73 |

|                      |                                     |            |         |          |         |                       |        |                        |           |         |     |   |            |
|----------------------|-------------------------------------|------------|---------|----------|---------|-----------------------|--------|------------------------|-----------|---------|-----|---|------------|
| M357T743<br>M405T396 | Rutamarin                           | 357.169037 | 742.68  | 356.1624 | 1.78944 | C21H24O5              | C09308 | [M+H] <sup>+</sup>     | mzCloud   | 0.61799 | pos | 1 | 35146059.7 |
| _1                   | Rutarin                             | 405.113814 | 396.023 | 424.1369 | 11.5913 | C20H24O10             | C09309 | [M-H2O-H] <sup>-</sup> | mzCloud   | 0.75948 | neg | 1 | 1698650.25 |
| M609T503             | Rutin                               | 609.159235 | 502.873 | 610.1534 | 21.5238 | C27H30O16             | C05625 | [M-H] <sup>-</sup>     | MoNA      | 0.28477 | neg | 2 | 1611104.71 |
| M336T155             | (Hydroxymethyl)g<br>S-[ (Z)-N-      | 336.0922   | 155.033 | 337.0944 | 15.1025 | 7S<br>C11H19N3O       | C14180 | [M-H] <sup>-</sup>     | MetaDNA   | 4.8E-05 | neg | 2 | 8703832.86 |
| M421T194             | Hydroxy (phenyl)a<br>S-Adenosyl-L-  | 421.130683 | 194.243 | 440.1366 | 29.6194 | 7S<br>C15H22N6O       | C21622 | [M-H2O-H] <sup>-</sup> | MetaDNA   | 0.08638 | neg | 2 | 3224441.67 |
| M399T343             | methionine<br>S-                    | 399.14591  | 343.226 | 398.1372 | 3.59306 | 5S<br>C14H20N6O       | C00019 | [M+H] <sup>+</sup>     | mzCloud   | 0.74694 | pos | 1 | 3585830.05 |
| M384T252             | Adenosylhomocyst                    | 384.121485 | 251.727 | 384.1216 | 0.2996  | 5S                    | C00021 | [M] <sup>-</sup>       | GNPS      | 0.58805 | neg | 1 | 175342.817 |
| M144T384             | S-Allylcysteine<br>S-Carboxymethyl- | 144.043894 | 383.536 | 161.051  | 2.2773  | C6H11NO2S             | C16759 | [M+H-H2O] <sup>+</sup> | BioDeepDB | 0.71599 | pos | 1 | 3050316.4  |
| M180T463             | L-cysteine<br>S-                    | 180.035263 | 463.271 | 179.0252 | 15.3389 | C5H9NO4S<br>C13H21N3O | C03727 | [M+H] <sup>+</sup>     | BioDeepDB | 0.96873 | pos | 1 | 815690.023 |
| M378T199             | Lactoylglutathio                    | 378.093504 | 198.821 | 379.1049 | 10.8971 | 8S                    | C03451 | [M-H] <sup>-</sup>     | MoNA      | 0.69963 | neg | 1 | 860748.058 |
| M183T66              | Saccharin                           | 183.003433 | 66.2043 | 182.999  | 24.225  | C7H5NO3S<br>C11H20N2O | C12283 | [M] <sup>-</sup>       | BioDeepDB | 0.91203 | neg | 1 | 555289.837 |
| M259T169<br>M163T384 | Saccharopine                        | 259.128092 | 169.221 | 276.1321 | 13.22   | 6                     | C00449 | [M+H-H2O] <sup>+</sup> | MetaDNA   | 0.02861 | pos | 2 | 12875162.3 |
| _1                   | Safrole                             | 163.074997 | 383.536 | 162.0681 | 2.32691 | C10H10O2              | C10490 | [M+H] <sup>+</sup>     | mzCloud   | 0.60101 | pos | 1 | 11450294.5 |
| M286T386<br>M123T577 | Salicin                             | 286.105222 | 386.352 | 286.1053 | 0.27193 | C13H18O7              | C01451 | [M] <sup>+</sup>       | BioDeepDB | 0.69587 | pos | 1 | 8270048.46 |
| _2                   | Salicyl alcohol                     | 123.043619 | 576.787 | 124.0524 | 12.2339 | C7H8O2                | C02323 | [M-H] <sup>-</sup>     | mzCloud   | 0.84539 | neg | 1 | 3420431.79 |
| M137T416             | Salicylic acid                      | 137.022893 | 416.128 | 138.0317 | 0.55389 | C7H6O3                | C00805 | [M-H] <sup>-</sup>     | BioDeepDB | 1E-31   | neg | 2 | 22094854   |
| M176T503             | Salicyluric acid                    | 176.034064 | 502.873 | 195.0532 | 4.23814 | C9H9NO4               | C07588 | [M-H2O-H] <sup>-</sup> | BioDeepDB | 0.63858 | neg | 1 | 1702358.26 |
| M300T170             | Salidroside                         | 300.118927 | 170.049 | 300.1209 | 6.58298 | C14H20O7              | C06046 | [M] <sup>-</sup>       | OTCML     | 0.75888 | neg | 1 | 23113266   |
| M415T837             | Salmeterol                          | 415.267591 | 836.769 | 415.2723 | 11.3407 | C25H37NO4             | C07241 | [M] <sup>-</sup>       | BioDeepDB | 0.68597 | neg | 1 | 11723131.5 |

|                      |                                |            |         |          |         |                       |        |                        |           |         |       |   |            |
|----------------------|--------------------------------|------------|---------|----------|---------|-----------------------|--------|------------------------|-----------|---------|-------|---|------------|
| M328T453             | Salutaridine                   | 328.153136 | 453.317 | 327.1471 | 3.54649 | C19H21N04             | C05179 | [M+H] <sup>+</sup>     | OTCML     | 1.5E-06 | pos   | 2 | 36158552.1 |
| M494T657             | Salvianolic acid<br>A          | 494.127084 | 656.84  | 494.1213 | 11.7116 | C26H22O10             | C10492 | [M] <sup>-</sup>       | OTCML     | 0.76701 | neg   | 1 | 301525.369 |
| M433T715             | Salvinorin A                   | 433.188588 | 715.011 | 432.1784 | 6.6676  | C23H28O8              | C20196 | [M+H] <sup>+</sup>     | BioDeepDB | 0.99813 | pos   | 1 | 5546785.97 |
| M89T63_1             | Sarcosine                      | 89.0788653 | 63.4448 | 89.0477  | 5.73525 | C3H7NO2               | C00213 | [M] <sup>+</sup>       | BioDeepDB | 4.5E-13 | pos   | 2 | 18432724.2 |
| M417T555             | Sarsasapogenin                 | 417.331996 | 555.358 | 416.329  | 10.2547 | C27H44O3              | C03963 | [M+H] <sup>+</sup>     | BioDeepDB | 8.7E-10 | pos   | 2 | 14490620.1 |
| M509T453             | Satratoxin H                   | 509.216169 | 453.126 | 528.2359 | 2.63305 | C29H36O9              | C20017 | [M-H2O-H] <sup>-</sup> | MoNA      | 0.99214 | neg   | 1 | 1429681.44 |
| M372T732             | Saucernetin                    | 372.19881  | 731.793 | 372.1937 | 13.7292 | C22H28O5              | C10879 | [M] <sup>-</sup>       | GNPS      | 0.99998 | neg   | 1 | 2935577.57 |
| M345T559             | Saupirin                       | 345.136841 | 558.574 | 346.1416 | 7.1816  | C19H22O6<br>C10H17N7O | C09547 | [M-H] <sup>-</sup>     | OTCML     | 0.79155 | neg   | 1 | 920984.558 |
| M299T338             | Saxitoxin                      | 299.133855 | 337.767 | 299.1342 | 1.15473 | 4<br>C17H12F4N        | C13757 | [M] <sup>+</sup>       | mzCloud   | 0.64272 | pos   | 1 | 6719667.56 |
| M385T164             | SC-58125<br>Scandoside         | 385.058392 | 163.846 | 384.0556 | 11.4483 | 202S                  | C11705 | [M+H] <sup>+</sup>     | BioDeepDB | 0.99987 | pos   | 1 | 2179465.69 |
| M403T111<br>M415T818 | methyl ester                   | 403.123785 | 110.926 | 404.1319 | 1.98637 | C17H24O11             | C09798 | [M-H] <sup>-</sup>     | OTCML     | 0.65303 | neg   | 1 | 512947.561 |
| _1                   | Schisandrin                    | 415.207652 | 818.418 | 432.2148 | 0.68147 | C24H32O7              | C17064 | [M+H-2O] <sup>+</sup>  | OTCML     | 2.1E-10 | pos   | 2 | 75939137.2 |
| M535T372<br>M207T682 | Schisantherin A                | 535.195974 | 371.633 | 536.2046 | 2.52283 | C30H32O9              | C10881 | [M-H] <sup>-</sup>     | MoNA      | 0.99188 | neg   | 1 | 471113.324 |
| _1                   | Scoparone                      | 207.064502 | 681.885 | 206.0579 | 3.2542  | C11H10O4              | C09311 | [M+H] <sup>+</sup>     | mzCloud   | 0.63699 | pos   | 1 | 19056741.7 |
| M286T299<br>_1       | Scopolamine                    | 286.137108 | 299.493 | 303.1471 | 8.94042 | C17H21N04             | C01851 | [M+H-2O] <sup>+</sup>  | BioDeepDB | 0.99938 | pos   | 1 | 17942358.4 |
| M193T500<br>_1       | Scopoletin<br>Scullycapflavone | 193.049443 | 500.045 | 192.0423 | 0.69097 | C10H8O4               | C01752 | [M+H] <sup>+</sup>     | mzCloud   | 3.8E-13 | pos   | 2 | 34402399   |
| M374T121             | II                             | 374.09357  | 120.945 | 374.1002 | 17.7224 | C19H18O8              | C10183 | [M] <sup>-</sup>       | MoNA      |         | 1 neg | 1 | 5406529.72 |
| M179T526<br>M807T785 | scyllo-Inositol                | 179.053098 | 526.124 | 180.0634 | 16.898  | C6H12O6<br>C45H75NO1  | C06153 | [M-H] <sup>-</sup>     | MetaDNA   | 0.00017 | neg   | 2 | 85190070.5 |
| _1                   | Scytophycin C                  | 806.555914 | 785.136 | 805.534  | 18.1342 | 1                     | C16865 | [M+H] <sup>+</sup>     | GNPS      |         | 1 pos | 1 | 5354724.18 |

| C12H2504S  |                           |            |         |          |         |           |        |            |           |             |              |
|------------|---------------------------|------------|---------|----------|---------|-----------|--------|------------|-----------|-------------|--------------|
| M269T299   | SDS                       | 269.113226 | 298.619 | 288.1371 | 20.3776 | . Na      | C11166 | [M-H2O-H]- | BioDeepDB | 1 neg       | 1 1475640.17 |
| M201T428   | Sebacic acid              | 201.112435 | 428.448 | 202.1205 | 3.92351 | C10H18O4  | C08277 | [M-H]-     | MoNA      | 6.3E-10 neg | 2 40243715.9 |
| M345T583   | Secoisolariciresinol      | 345.1681   | 583.068 | 362.1729 | 7.63016 | C20H26O6  | C18167 | [M+H-H2O]+ | MoNA      | 5.1E-08 pos | 2 20786382.9 |
| M200T214   | Securinine                | 200.102066 | 213.872 | 217.1103 | 3.89236 | C13H15N02 | C10614 | [M+H-H2O]+ | OTCML     | 0.71813 pos | 1 406154132  |
| M210T301   | Sedoheptulose             | 210.07508  | 300.782 | 210.074  | 5.14065 | C7H14O7   | C02076 | [M]+       | BioDeepDB | 0.681 pos   | 1 11358732.7 |
| M271T83    | Sedoheptulose 7-phosphate | 271.02218  | 82.8986 | 290.0403 | 0.99513 | C7H15O10P | C05382 | [M-H2O-H]- | mzCloud   | 0.78042 neg | 1 49986328.3 |
| M170T343   | Selegiline                | 170.127638 | 343.226 | 187.1361 | 6.04454 | C13H17N   | C07245 | [M+H-H2O]+ | BioDeepDB | 0.72481 pos | 1 106359960  |
| M129T87_1  | Selenite                  | 128.9104   | 87.426  | 127.9013 | 6.20358 | SeO3      | C05684 | [M-H]-     | BioDeepDB | 0.99773 neg | 1 4539200.55 |
| M197T49    | Selenomethionine          | 196.992863 | 48.7362 | 196.9955 | 13.3849 | C5H11N02S | C05335 | [M]+       | BioDeepDB | 0.82987 pos | 1 1907194.82 |
| M230T374   | Semustine                 | 230.104192 | 373.532 | 247.1088 | 12.2804 | 302       | C07640 | [M+H-H2O]+ | BioDeepDB | 0.99993 pos | 1 18230191.2 |
| M318T298_2 | Senecionine               | 318.164526 | 298.135 | 335.1733 | 4.12616 | C18H25N05 | C06176 | [M+H-H2O]+ | OTCML     | 0.7272 pos  | 1 32675404.6 |
| M348T389   | Senkirkine                | 348.17675  | 389.035 | 365.1838 | 1.1017  | C19H27N06 | C10396 | [M+H-H2O]+ | MoNA      | 0.98804 pos | 1 4627426.45 |
| M193T834   | Senkyunolide              | 193.120362 | 834.486 | 192.115  | 9.51575 | C12H16O2  | C17853 | [M+H]+     | OTCML     | 0.89225 pos | 1 84294139.9 |
| M177T334   | Serotonin                 | 177.101816 | 333.715 | 176.095  | 2.59829 | C10H12N2O | C00780 | [M+H]+     | mzCloud   | 0.60255 pos | 1 12432365.7 |
| M288T163   | Sertraline                | 288.070007 | 162.728 | 305.0738 | 12.6378 | N         | C07246 | [M+H-H2O]+ | MoNA      | 0.99995 pos | 1 2068243.73 |
| M337T293   | Sesamin                   | 337.104483 | 292.623 | 354.1103 | 4.79578 | C20H18O6  | C10882 | [M+H-H2O]+ | mzCloud   | 0.77474 pos | 1 1628392.46 |
| M175T241   | Shikimic acid             | 175.027257 | 241.368 | 174.0528 | 1.42802 | C7H10O5   | C00493 | [M+H]+     | BioDeepDB | 4.5E-06 pos | 2 11319217.7 |
| M473T467   | Sildenafil                | 473.19737  | 467.127 | 474.2049 | 0.53592 | C22H30N6O | C07259 | [M-H]-     | mzCloud   | 0.64589 neg | 1 1099721.23 |
| M482T379   | Silibinin                 | 482.122527 | 379.066 | 482.1213 | 2.54582 | C25H22O10 | C07610 | [M]-       | BioDeepDB | 0.68107 neg | 1 645325.104 |

|                |                        |            |         |          |         |                        |        |                       |           |         |       |   |            |
|----------------|------------------------|------------|---------|----------|---------|------------------------|--------|-----------------------|-----------|---------|-------|---|------------|
| M201T452       | Simazine               | 201.075384 | 451.804 | 201.0781 | 13.5096 | C7H12C1N5<br>C14H20FN3 | C11172 | [M] <sup>+</sup>      | mzCloud   | 0.71912 | pos   | 1 | 3387058.12 |
| M276T159<br>_1 | Simeconazole           | 276.125482 | 159.017 | 293.136  | 11.1693 | OSi                    | C18544 | [M+H-20] <sup>+</sup> | mzCloud   | 0.85588 | pos   | 1 | 7746397.8  |
| M418T626       | Simvastatin            | 418.279607 | 626.183 | 418.2719 | 18.3677 | C25H38O5               | C07262 | [M] <sup>-</sup>      | GNPS      |         | 1 neg | 1 | 716013.384 |
| M225T396       | Sinapic acid           | 225.074805 | 396.415 | 224.0685 | 4.1974  | C11H12O5               | C00482 | [M+H] <sup>+</sup>    | MoNA      | 1.2E-07 | pos   | 2 | 3422500.07 |
| M293T436       | Sinapine               | 293.158926 | 436.069 | 310.1654 | 3.27356 | C16H24N05              | C00933 | [M+H-20] <sup>+</sup> | mzCloud   | 0.64697 | pos   | 1 | 4377641.59 |
| M193T418       | Sinapyl alcohol        | 193.084878 | 417.676 | 210.0892 | 8.39945 | C11H14O4               | C02325 | [M+H-20] <sup>+</sup> | BioDeepDB | 1.9E-10 | pos   | 2 | 150430435  |
| M353T793       | Sinensetin             | 353.101638 | 793.233 | 372.1209 | 2.46949 | C20H20O7<br>C10H17N09  | C10186 | [M-20-H] <sup>-</sup> | MoNA      | 0.63227 | neg   | 1 | 8996192.47 |
| M340T441       | Sinigrin               | 340.025301 | 440.833 | 359.0345 | 27.0292 | S2                     | C08427 | [M-20-H] <sup>-</sup> | BioDeepDB | 0.86981 | neg   | 1 | 1355878.02 |
| M330T471       | Sinomenine             | 330.167982 | 470.602 | 329.1627 | 6.0381  | C19H23N04              | C09643 | [M+H] <sup>+</sup>    | mzCloud   | 0.79464 | pos   | 1 | 8433106.54 |
| M260T176       | Skimmianine            | 260.093061 | 175.952 | 259.0845 | 4.94191 | C14H13N04<br>C24H39O4. | C10740 | [M+H] <sup>+</sup>    | MoNA      | 0.99631 | pos   | 1 | 336147675  |
| M415T829<br>_1 | Sodium<br>deoxycholate | 415.20771  | 828.73  | 414.2746 | 6.42787 | Na<br>C45H73N01        | C11171 | [M+H] <sup>+</sup>    | BioDeepDB | 0.64442 | pos   | 1 | 107137702  |
| M866T563<br>_1 | Solamargine            | 866.474174 | 562.946 | 867.498  | 19.125  | 5                      | C10819 | [M-H] <sup>-</sup>    | OTCML     | 0.95317 | neg   | 1 | 1165777.01 |
| M183T92        | Sorbitol               | 183.084831 | 91.7174 | 182.079  | 7.37767 | C6H14O6<br>C12H20N2O   | C00794 | [M+H] <sup>+</sup>    | BioDeepDB | 0.00022 | pos   | 2 | 908178346  |
| M273T184       | Sotalol                | 273.126262 | 183.886 | 272.1195 | 1.60231 | 3S                     | C07309 | [M+H] <sup>+</sup>    | BioDeepDB | 0.6191  | pos   | 1 | 7746390.3  |
| M457T762       | Soyasapogenol A        | 457.363122 | 762.439 | 474.3709 | 0.7526  | C30H50O4               | C17419 | [M+H-20] <sup>+</sup> | MetaDNA   | 8.5E-05 | pos   | 2 | 10137347.1 |
| M441T787       | Soyasapogenol F        | 441.37135  | 786.569 | 458.376  | 6.30682 | C30H50O3<br>C19H22F2N  | C17421 | [M+H-20] <sup>+</sup> | MetaDNA   | 3.3E-05 | pos   | 2 | 63011810   |
| M373T710       | Sparfloxacin           | 373.153575 | 710.246 | 392.166  | 15.985  | 403                    | C07662 | [M-20-H] <sup>-</sup> | GNPS      | 0.83455 | neg   | 1 | 486573.35  |
| M333T89_<br>2  | Spectinomycin          | 333.165606 | 88.6838 | 332.1584 | 0.20971 | 7                      | C02078 | [M+H] <sup>+</sup>    | mzCloud   | 0.5913  | pos   | 1 | 81786778.5 |
| M144T278       | Spermidine             | 143.91408  | 278.267 | 145.1579 | 2.90779 | C7H19N3                | C00315 | [M-H] <sup>-</sup>    | BioDeepDB | 1.1E-10 | neg   | 2 | 2866970.55 |

|                      |                               |            |         |          |         |                        |        |                                        |           |         |     |   |            |
|----------------------|-------------------------------|------------|---------|----------|---------|------------------------|--------|----------------------------------------|-----------|---------|-----|---|------------|
| M203T369             | Spermine                      | 203.138244 | 369.321 | 202.2157 | 0.15309 | C10H26N4               | C00750 | [M+H] <sup>+</sup>                     | BioDeepDB | 0.57752 | pos | 1 | 106601265  |
| M302T803<br>M300T795 | Sphinganine                   | 302.304018 | 802.88  | 301.2981 | 1.573   | C18H39NO2              | C00836 | [M+H] <sup>+</sup>                     | BioDeepDB | 0.59036 | pos | 1 | 26309913.5 |
| _1                   | Sphingosine<br>Sphingosine 1- | 300.288985 | 795.165 | 299.2824 | 2.30217 | C18H37NO2<br>C18H38NO5 | C00319 | [M+H] <sup>+</sup>                     | mzCloud   | 0.59743 | pos | 1 | 21897509.5 |
| M380T804             | phosphate                     | 380.257186 | 804.327 | 379.2488 | 2.92006 | P                      | C06124 | [M+H] <sup>+</sup>                     | BioDeepDB | 5.9E-12 | pos | 2 | 20561078.9 |
| M608T170<br>M731T703 | Spinisin                      | 608.163699 | 170.049 | 608.1741 | 17.1347 | C28H32O15<br>C41H65NO1 | C17834 | [M] <sup>-</sup>                       | OTCML     | 0.98278 | neg | 1 | 219242.553 |
| _1                   | Spiniosyn A                   | 731.463106 | 703.35  | 731.4608 | 3.15308 | 0                      | C11054 | [M] <sup>+</sup>                       | BioDeepDB | 0.99328 | pos | 1 | 10891319.2 |
| M745T589             |                               |            |         |          |         | C42H67NO1              |        |                                        |           |         |     |   |            |
| _2                   | Spiniosyn D                   | 745.458554 | 589.053 | 745.4765 | 24.0739 | 0                      | C11056 | [M] <sup>+</sup>                       | BioDeepDB | 1       | pos | 1 | 18165330.5 |
| M417T798<br>M354T91_ | Spirolactone                  | 417.212833 | 797.773 | 416.2021 | 8.21379 | C24H32O4S              | C07310 | [M+H] <sup>+</sup>                     | MoNA      | 0.68653 | pos | 1 | 170922072  |
| 2                    | Spirotetramat                 | 354.168794 | 90.9026 | 373.1889 | 4.84451 | C21H27NO5              | C18807 | [M-H2O-H] <sup>-</sup>                 | BioDeepDB | 0.99617 | neg | 1 | 10419602.6 |
| M410T813             | Squalene                      | 410.385553 | 812.862 | 410.3913 | 14.0039 | C30H50                 | C00751 | [M] <sup>+</sup>                       | BioDeepDB | 0.73073 | pos | 1 | 6987176.4  |
| M144T93<br>M665T147  | Stachydrine                   | 144.101555 | 92.7272 | 143.0946 | 2.42723 | C7H13NO2               | C10172 | [M+H] <sup>+</sup>                     | OTCML     | 0.63286 | pos | 1 | 11324391.4 |
| _1                   | Stachyose                     | 665.19814  | 147.455 | 666.222  | 23.4917 | C24H42O21              | C01613 | [M-H] <sup>-</sup>                     | BioDeepDB | 7.8E-08 | neg | 2 | 120169800  |
| M329T792             |                               |            |         |          |         |                        |        |                                        |           |         |     |   |            |
| _2                   | Stanozolol                    | 329.25364  | 792.146 | 328.2515 | 15.4879 | C21H32N2O              | C07311 | [M+H] <sup>+</sup><br>[M] <sup>-</sup> | MoNA      | 0.76173 | pos | 1 | 1019764.7  |
| M284T784             | Stearic acid                  | 284.292408 | 783.78  | 284.2715 | 0.29375 | C18H36O2               | C01530 | H2O+NH4 <sup>+</sup>                   | BioDeepDB | 0.58121 | pos | 1 | 7830371.65 |
| M277T814             | Stearidonic acid              | 277.216079 | 814.095 | 276.2089 | 0.34952 | C18H28O2               | C16300 | [M+H] <sup>+</sup>                     | BioDeepDB | 2.6E-09 | pos | 2 | 90670540.4 |
| M281T830             | Stearolic acid                | 281.246319 | 830.193 | 280.2402 | 4.11506 | C18H32O2               | C08459 | [M+H] <sup>+</sup>                     | mzCloud   | 0.63167 | pos | 1 | 11634056.2 |
| M455T235<br>M804T804 | Steganacin                    | 455.135314 | 234.972 | 456.142  | 1.22485 | C24H24O9               | C10886 | [M-H] <sup>-</sup>                     | MoNA      | 0.98841 | neg | 1 | 2223688.84 |
| _2                   | Stevioside                    | 804.363279 | 804.327 | 804.378  | 18.301  | C38H60O18              | C09189 | [M] <sup>+</sup>                       | BioDeepDB | 0.77624 | pos | 1 | 3155901.57 |
| M395T562             | Stigmasterol                  | 395.365261 | 561.955 | 412.3705 | 5.55175 | C29H48O                | C05442 | [M+H-H2O] <sup>+</sup>                 | BioDeepDB | 0.84817 | pos | 1 | 6077208.63 |



|          |                               |            |         |          |         |                        |        |                       |           |         |     |   |            |
|----------|-------------------------------|------------|---------|----------|---------|------------------------|--------|-----------------------|-----------|---------|-----|---|------------|
| M183T386 |                               |            |         |          |         |                        |        |                       |           |         |     |   |            |
| _1       | Stipitatate                   | 183.028419 | 386.352 | 182.0215 | 1.95324 | C8H605<br>C21H39N7O    | C01853 | [M+H] <sup>+</sup>    | MoNA      | 0.99046 | pos | 1 | 798820.134 |
| M582T567 | Streptomycin                  | 582.272755 | 567.1   | 581.2657 | 0.32676 | 12<br>C25H22N4O        | C00413 | [M+H] <sup>+</sup>    | MoNA      | 0.67721 | pos | 1 | 7504564.53 |
| M507T181 | Streptonigrin                 | 507.152997 | 181.154 | 506.1438 | 3.78686 | 8                      | C02081 | [M+H] <sup>+</sup>    | BioDeepDB | 0.9945  | pos | 1 | 18625049   |
| M266T534 | Streptozocin                  | 266.100633 | 533.958 | 265.091  | 8.76591 | C8H15N3O7              | C07313 | [M+H] <sup>+</sup>    | BioDeepDB | 0.66943 | pos | 1 | 30982985   |
| M405T799 | Strophanthidin                | 405.224355 | 799.089 | 404.2199 | 6.96154 | C23H32O6<br>C21H22N2O  | C19988 | [M+H] <sup>+</sup>    | mzCloud   | 0.64198 | pos | 1 | 35304774.6 |
| M317T422 | Strychnine                    | 317.156471 | 421.784 | 334.1681 | 13.2259 | 2                      | C06522 | [M+H-20] <sup>+</sup> | mzCloud   | 0.95967 | pos | 1 | 4013740.17 |
| M105T789 | Styrene                       | 105.069365 | 789.293 | 104.0626 | 4.86698 | C8H8                   | C07083 | [M+H] <sup>+</sup>    | MoNA      | 0.9962  | pos | 1 | 12569755.8 |
| M173T288 | Suberic acid                  | 173.080011 | 287.981 | 174.0892 | 2.81239 | C8H14O4                | C08278 | [M-H] <sup>-</sup>    | BioDeepDB | 5E-10   | neg | 2 | 26411071.9 |
| M118T79  | Succinic acid                 | 118.020917 | 79.4105 | 118.0266 | 3.69156 | C4H6O4                 | C00042 | [M] <sup>-</sup>      | BioDeepDB | 2.2E-05 | neg | 2 | 24130696.2 |
| M103T97  | Succinic acid<br>semialdehyde | 103.038807 | 96.7698 | 102.0317 | 1.64027 | C4H6O3                 | C00232 | [M+H] <sup>+</sup>    | MetaDNA   | 0.00659 | pos | 2 | 363317513  |
| M99T675  | Succinic acid<br>anhydride    | 99.0069694 | 675.322 | 100.016  | 17.7224 | C4H4O3                 | C19524 | [M-H] <sup>-</sup>    | BioDeepDB | 3.6E-06 | neg | 2 | 10774121.6 |
| M341T146 | Sucrose                       | 341.102386 | 146.08  | 342.1162 | 18.5114 | C12H22O11              | C00089 | Unknown               | OTCML     | 0.03656 | neg | 2 | 34401324.5 |
| M231T329 | Sudan I                       | 231.085863 | 329.481 | 248.095  | 7.36773 | C16H12N2O<br>C22H30N2O | C19525 | [M+H-20] <sup>+</sup> | mzCloud   | 0.83438 | pos | 1 | 3722061.1  |
| M386T371 | Sufentanil                    | 386.201968 | 370.777 | 386.2028 | 2.15353 | 2S                     | C08022 | [M] <sup>+</sup>      | BioDeepDB | 0.70449 | pos | 1 | 3217210.68 |
| M129T784 | Sulcatol<br>Sulfacetamide     | 129.127857 | 783.78  | 128.1201 | 3.72179 | C8H16O<br>C8H9N2O3S    | C07288 | [M+H] <sup>+</sup>    | mzCloud   | 0.64135 | pos | 1 | 20658714.6 |
| M219T38  | sodium anhydrous              | 219.017943 | 38.3208 | 236.0232 | 9.94179 | . Na<br>C12H14N4O      | C08051 | [M+H-20] <sup>+</sup> | BioDeepDB | 0.99965 | pos | 1 | 968445.372 |
| M311T393 | Sulfadoxine                   | 311.080212 | 392.715 | 310.0736 | 2.13597 | 4S<br>C12H14N4O        | C07630 | [M+H] <sup>+</sup>    | mzCloud   | 0.68245 | pos | 1 | 2497482.73 |
| M278T814 | Sulfamethazine                | 278.083012 | 814.095 | 278.0837 | 2.47579 | 2S<br>C9H10N4O2        | C19530 | [M] <sup>+</sup>      | mzCloud   | 0.63008 | pos | 1 | 5590777.11 |
| M269T571 | Sulfamethizole                | 269.022209 | 570.599 | 270.0245 | 18.5298 | S2                     | C08050 | [M-H] <sup>-</sup>    | BioDeepDB | 0.97992 | neg | 1 | 888661.851 |

|                      |                        |            |         |          |         |                        |        |           |           |         |     |   |            |
|----------------------|------------------------|------------|---------|----------|---------|------------------------|--------|-----------|-----------|---------|-----|---|------------|
| M253T290             | Sulfamethoxazole       | 253.054515 | 289.534 | 253.0521 | 9.54387 | C10H11N3O<br>3S        | C07315 | [M]-      | MoNA      | 0.71722 | neg | 1 | 564311.351 |
| M280T249             | Sulfamonomethoxi<br>ne | 280.059815 | 249.466 | 280.063  | 11.374  | C11H12N4O<br>3S        | C12540 | [M]-      | mzCloud   | 0.80006 | neg | 1 | 108277.061 |
| M171T227             | Sulfanilamide          | 171.028466 | 227.421 | 172.0306 | 29.6194 | C6H8N2O2S<br>C18H14N4O | C07458 | [M-H]-    | BioDeepDB | 0.00015 | neg | 2 | 6352846.82 |
| M398T807             | Sulfasalazine          | 398.066526 | 807.232 | 398.0685 | 4.95777 | 5S<br>C9H9N3O2S        | C07316 | [M]+      | GNPS      | 0.6465  | pos | 1 | 19999917.3 |
| M254T312             | Sulfathiazole          | 254.011737 | 312.058 | 255.0136 | 21.2355 | 2<br>C23H20N2O         | C11169 | [M-H]-    | MoNA      | 0.84056 | neg | 1 | 1958669.45 |
| M403T456             | Sulfinpyrazone         | 403.113011 | 456.2   | 404.1195 | 1.95265 | 3S<br>C11H13N3O        | C07317 | [M-H]-    | BioDeepDB | 0.8798  | neg | 1 | 529202.402 |
| M250T216             | Sulfisoxazole          | 250.062483 | 216.359 | 267.0678 | 8.4652  | 3S<br>C20H17F03        | C07318 | [M+H-2O]+ | GNPS      | 0.66194 | pos | 1 | 14788096.1 |
| M357T804             | Sulindac               | 357.094776 | 804.327 | 356.0882 | 1.95943 | S<br>C14H21N3O         | C01531 | [M+H]+    | GNPS      | 0.6191  | pos | 1 | 9184589.6  |
| M294T264             | Sumatriptan            | 294.126362 | 263.845 | 295.1354 | 5.99151 | 2S                     | C07319 | [M-H]-    | MoNA      | 0.66067 | neg | 1 | 963588.814 |
| M241T149             | Suprofen               | 241.02924  | 148.981 | 260.0507 | 12.7358 | C14H12O3S              | C07320 | [M-2H-H]- | BioDeepDB | 0.99995 | neg | 1 | 790655.969 |
| M339T489             | Sweroside              | 339.108053 | 488.885 | 358.1264 | 0.18118 | C16H22O9               | C17071 | [M-2H-H]- | OTCML     | 0.64032 | neg | 1 | 518778.893 |
| M355T472<br>M179T378 | Swertiamarin           | 355.101284 | 471.768 | 374.1213 | 4.57065 | C16H22O10              | C09800 | [M-2H-H]- | OTCML     | 0.72937 | neg | 1 | 1973456.85 |
| _1                   | Syringic acid          | 179.034051 | 377.64  | 198.0528 | 2.00403 | C9H10O5                | C10833 | [M-2H-H]- | mzCloud   | 0.59564 | neg | 1 | 8157216.93 |
| M372T446             | Syringin               | 372.142099 | 445.984 | 372.142  | 0.18074 | C17H24O9               | C01533 | [M]+      | OTCML     | 0.66388 | pos | 1 | 1287194.92 |
| M465T767             | T2 Toxin               | 465.208174 | 767.145 | 466.2203 | 10.3879 | C24H34O9<br>C40H48N4O  | C09738 | [M-H]-    | GNPS      | 0.73351 | neg | 1 | 231976.855 |
| M599T451<br>M685T144 | Tabernamine            | 599.384699 | 450.503 | 616.3777 | 24.0794 | 2                      | C09242 | [M+H-2O]+ | GNPS      | 1       | pos | 1 | 10431426.3 |
| _2                   | Taccalonolide A        | 685.263404 | 143.959 | 702.2888 | 26.1474 | C36H46O14              | C08635 | [M+H-2O]+ | OTCML     | 1       | pos | 1 | 27801376.8 |
| M198T558             | Tacrine                | 198.112987 | 557.967 | 198.1157 | 13.6919 | C13H14N2               | C01453 | [M]+      | BioDeepDB | 0.92725 | pos | 1 | 5477869.87 |
| M354T566             | Tamoxifen              | 354.214813 | 565.79  | 371.2249 | 7.49063 | C26H29NO               | C07108 | [M+H-2O]+ | MoNA      | 0.86625 | pos | 1 | 15550184   |

|          |                                 |            |         |          |         |    |                        |        |                       |           |         |     |   |            |
|----------|---------------------------------|------------|---------|----------|---------|----|------------------------|--------|-----------------------|-----------|---------|-----|---|------------|
| M409T304 | Tamsulosin                      | 409.178108 | 303.513 | 408.1719 | 2.61    | 5S | C20H28N2O              | C07124 | [M+H] <sup>+</sup>    | mzCloud   | 0.71333 | pos | 1 | 9428127.87 |
| M373T547 | Tangeretin                      | 373.126885 | 546.651 | 372.1209 | 3.46006 |    | C20H20O7               | C10190 | [M+H] <sup>+</sup>    | mzCloud   | 0.64633 | pos | 1 | 7555964.51 |
| M150T338 | Tartaric acid                   | 150.018258 | 338.222 | 150.0164 | 12.3828 |    | C4H6O6                 | C00898 | [M] <sup>-</sup>      | GNPS      | 0.90467 | neg | 1 | 594606.648 |
| M126T75  | Taurine                         | 125.986145 | 74.9588 | 125.0147 | 1.27569 |    | C2H7NO3S               | C00245 | [M+H] <sup>+</sup>    | BioDeepDB | 0.58681 | pos | 1 | 815720788  |
| M482T833 | Taurochenodesoxy<br>cholic acid | 482.28487  | 833.029 | 499.2968 | 9.32227 |    | C26H45NO6<br>S         | C05465 | [M+H-20] <sup>+</sup> | MoNA      | 0.66948 | pos | 1 | 2746919.09 |
| M515T631 | Taurocholic acid                | 515.285138 | 630.507 | 515.2917 | 12.7354 |    | C26H45NO7<br>S         | C05122 | [M] <sup>+</sup>      | BioDeepDB | 0.69963 | pos | 1 | 7059914.38 |
| M515T619 | Taurohyocholate                 | 515.278369 | 618.683 | 515.2917 | 25.8707 |    | S                      | C15516 | [M] <sup>+</sup>      | MoNA      | 0.95471 | pos | 1 | 6506913.8  |
| M303T449 | Taxifolin                       | 303.049931 | 448.527 | 304.0583 | 2.53817 |    | C15H12O7               | C01617 | Unknown               | OTCML     | 0.63855 | neg | 1 | 277238.244 |
| M504T440 | Taxusin                         | 504.262124 | 440.459 | 504.2723 | 20.181  |    | C28H40O8<br>C21H21NO2  | C20152 | [M] <sup>+</sup>      | BioDeepDB | 1       | pos | 1 | 2135257.85 |
| M352T549 | Tazarotene                      | 352.137361 | 549.375 | 351.1293 | 2.22938 |    | S                      | C12531 | [M+H] <sup>+</sup>    | MoNA      | 0.8195  | pos | 1 | 3839397.32 |
| M333T464 | Tebufenozide                    | 333.190625 | 464.011 | 352.2151 | 18.2615 |    | C22H28N2O<br>2         | C18526 | [M-20-H] <sup>-</sup> | BioDeepDB | 1       | neg | 1 | 1060127.53 |
| M462T154 | Tectoridin                      | 462.107326 | 153.601 | 462.1162 | 19.2298 |    | C22H22O11<br>C14H6C12F | C10533 | [M] <sup>-</sup>      | OTCML     | 0.99658 | neg | 1 | 1530953.2  |
| M379T31  | Teflubenzuron                   | 378.978071 | 31.4228 | 379.9742 | 29.2916 |    | 4N2O2<br>C33H30N4O     | C18437 | [M-H] <sup>-</sup>    | MoNA      | 1       | neg | 1 | 375847.286 |
| M514T680 | Telmisartan                     | 514.239925 | 680.402 | 514.2369 | 5.88178 |    | 2<br>C32H32O13         | C07710 | [M] <sup>+</sup>      | MoNA      | 0.75788 | pos | 1 | 2183663.11 |
| M656T385 | Teniposide                      | 656.170775 | 385.225 | 656.1564 | 21.9072 |    | S<br>C9H14N5O4         | C11153 | [M] <sup>-</sup>      | BioDeepDB | 0.99905 | neg | 1 | 433122.683 |
| M287T321 | Tenofovir                       | 287.074483 | 321.198 | 287.0783 | 13.2958 |    | P<br>C22H30N4O         | C17407 | [M] <sup>+</sup>      | mzCloud   | 0.97675 | pos | 1 | 9764090.79 |
| M397T412 | Tentoxin                        | 397.220386 | 411.838 | 414.2267 | 2.82031 |    | 4                      | C08441 | [M+H-20] <sup>+</sup> | mzCloud   | 0.69408 | pos | 1 | 2808498.53 |
| M410T532 | Tephrosin                       | 410.142624 | 532.372 | 410.1366 | 14.6883 |    | C23H22O7<br>C17H24ClN  | C10535 | [M] <sup>-</sup>      | MoNA      | 0.99999 | neg | 1 | 11608048.4 |
| M341T723 | Tepraloxydim                    | 341.141077 | 722.604 | 341.1394 | 4.91604 |    | O4                     | C18540 | [M] <sup>-</sup>      | MoNA      | 0.99627 | neg | 1 | 5421688.77 |

|          |                           | C19H25N5O  |         |          |         |                 |        |           |           |         |     |   |            |
|----------|---------------------------|------------|---------|----------|---------|-----------------|--------|-----------|-----------|---------|-----|---|------------|
| M386T720 | Terazosin                 | 386.188126 | 719.505 | 387.1907 | 12.1766 | 4               | C07127 | [M-H]-    | MoNA      | 0.79143 | neg | 1 | 2126666.72 |
| M291T716 | Terbinafine               | 291.194271 | 716.403 | 291.1987 | 15.2088 | C21H25N         | C08079 | [M]+      | MoNA      | 0.8227  | pos | 1 | 6724694.65 |
| M226T610 | Terbutaline               | 226.142599 | 609.592 | 225.1365 | 5.17636 | C12H19N03       | C07129 | [M+H]+    | MoNA      | 0.80733 | pos | 1 | 12142590.7 |
| M165T218 | Terephthalate             | 165.016724 | 218.43  | 166.0266 | 15.7573 | C8H6O4          | C06337 | [M-H]-    | mzCloud   | 1.4E-09 | neg | 2 | 38365313.2 |
| M471T604 | Terfenadine               | 471.30723  | 603.95  | 471.3137 | 13.7282 | C32H41N02       | C07463 | [M]+      | BioDeepDB | 0.89739 | pos | 1 | 1032172.64 |
| M229T779 | TES                       | 229.060939 | 779.407 | 229.062  | 4.62992 | C6H15N06S       | C05353 | [M]-      | MoNA      | 0.99587 | neg | 1 | 415962.781 |
| M289T374 | Testosterone              | 289.089908 | 373.532 | 288.2089 | 4.84591 | C19H28O2        | C00535 | [M+H]+    | BioDeepDB | 0.20395 | pos | 2 | 14057948.5 |
| M395T573 | Testosterone<br>cypionate | 395.292224 | 573.072 | 412.2977 | 4.95279 | C27H40O3        | C08156 | [M+H-2O]+ | mzCloud   | 0.77473 | pos | 1 | 5364146.28 |
| M425T541 | Testosterone<br>decanoate | 425.339265 | 541.275 | 442.3447 | 4.69909 | C29H46O3        | C14607 | [M+H-2O]+ | mzCloud   | 0.89071 | pos | 1 | 3095419.48 |
| M540T629 | Tetrabromobisphenol A     | 539.757815 | 629.272 | 539.7571 | 1.32474 | C15H12Br4<br>O2 | C13620 | [M]-      | MoNA      | 0.98871 | neg | 1 | 4620484.15 |
| M265T608 | Tetracaine                | 265.192475 | 608.261 | 264.1838 | 5.18329 | C15H24N2O       | C07526 | [M+H]+    | BioDeepDB | 0.99662 | pos | 1 | 3166517.79 |
| M367T643 | Tetracosanoic<br>acid     | 367.214064 | 643.166 | 368.3654 | 4.85133 | C24H48O2        | C08320 | [M-H]-    | BioDeepDB | 0.63761 | neg | 1 | 684537.099 |
| M445T484 | Tetracycline              | 445.16275  | 483.973 | 444.1533 | 4.88394 | C22H24N2O       | C06570 | [M+H]+    | mzCloud   | 0.64847 | pos | 1 | 907355.555 |
| M364T430 | Tetrahydrocortisone       | 364.220433 | 430.131 | 364.225  | 12.4675 | C21H32O5        | C05470 | [M]+      | mzCloud   | 0.83767 | pos | 1 | 1557901.65 |
| M446T347 | Tetrahydrofolic<br>acid   | 446.176947 | 347.175 | 445.171  | 2.9787  | C19H23N7O       | C00101 | [M+H]+    | BioDeepDB | 0.64854 | pos | 1 | 47722154.9 |
| M622T728 | Tetrandrine               | 622.298872 | 728.25  | 622.3043 | 8.70137 | C38H42N2O       | C09654 | [M]+      | OTCML     | 0.66745 | pos | 1 | 13862703   |
| M241T121 | Thalidomide               | 241.054816 | 120.525 | 258.0641 | 7.67493 | C13H10N2O       | C07910 | [M+H-2O]+ | GNPS      | 0.99882 | pos | 1 | 7203416.32 |
| M619T537 | Thalsimine                | 619.273649 | 536.761 | 636.2836 | 4.06498 | C38H40N2O       | C09661 | [M+H-2O]+ | MoNA      | 0.99498 | pos | 1 | 1039420.54 |
| M650T655 | Thapsigargin              | 650.327911 | 655.321 | 650.3302 | 3.51928 | C34H50O12       | C09561 | [M]-      | BioDeepDB | 0.994   | neg | 1 | 2850950.15 |

|                            |                                            |                          |                    |                      |                    |                                       |        |           |           |         |       |   |            |
|----------------------------|--------------------------------------------|--------------------------|--------------------|----------------------|--------------------|---------------------------------------|--------|-----------|-----------|---------|-------|---|------------|
| M180T759                   | Theobromine                                | 179.987578               | 759.428            | 180.0647             | 1.02375            | C7H8N4O2                              | C07480 | [M]-      | BioDeepDB | 0.15769 | neg   | 2 | 16787926   |
| M181T357<br>M201T197<br>_1 | Theophylline<br>Thiabendazole              | 181.132877<br>201.036247 | 356.74<br>196.644  | 180.0647<br>201.0361 | 8.82408<br>0.72876 | C7H8N4O2<br>C10H7N3S<br>C8H10C1N5     | C07130 | [M+H]+    | BioDeepDB | 0.39742 | pos   | 2 | 9753382.97 |
| M291T121                   | Thiamethoxam                               | 291.017746               | 120.525            | 291.0193             | 5.33941            | O3S<br>C12H17N4O                      | C18513 | [M]+      | MoNA      | 0.99681 | pos   | 1 | 20421403.3 |
| M266T118                   | Thiamine                                   | 266.120259               | 118.116            | 265.1123             | 2.56622            | S<br>C12H18N4O                        | C00378 | [M+H]+    | mzCloud   | 0.61867 | pos   | 1 | 52086113.6 |
| M345T391<br>M408T164<br>_2 | monophosphate<br>Thiamine<br>pyrophosphate | 345.081062<br>408.040127 | 391.341<br>163.846 | 345.0786<br>425.045  | 7.13557<br>6.27539 | 4PS<br>C12H19N4O<br>7P2S<br>C11H8N2O3 | C01081 | [M]-      | BioDeepDB | 0.74468 | neg   | 1 | 6259808.63 |
| M263T266                   | Thiazole<br>Thifensulfuron-                | 262.983627               | 265.624            | 279.9976             | 24.8651            | S2<br>C12H13N5O                       | C02740 | [M+H-20]+ | BioDeepDB | 0.94241 | pos   | 1 | 2761853.35 |
| M387T158                   | methyl                                     | 387.035992               | 157.773            | 387.0307             | 13.6743            | 6S2                                   | C10957 | [M]+      | MoNA      | 0.99998 | pos   | 1 | 9849198.38 |
| M166T218                   | Thioguanine<br>Thiophanate-                | 166.021207               | 218.43             | 167.0266             | 11.3422            | C5H5N5S<br>C12H14N4O                  | C07648 | [M-H]-    | mzCloud   | 0.77826 | neg   | 1 | 2918801.05 |
| M342T68                    | methyl                                     | 342.042953               | 67.6441            | 342.0456             | 7.73771            | 4S2                                   | C14432 | [M]-      | GNPS      | 0.99885 | neg   | 1 | 86583.6996 |
| M190T211                   | Thiotepa                                   | 190.052303               | 211.288            | 189.049              | 20.5029            | C6H12N3PS                             | C07641 | [M+H]+    | BioDeepDB | 0.78247 | pos   | 1 | 14321814.8 |
| M241T35                    | Thiram                                     | 241.000605               | 34.5397            | 239.9883             | 20.7315            | C6H12N2S4                             | C11160 | [M+H]+    | MoNA      |         | 1 pos | 1 | 7018662.04 |
| M135T84                    | Threonine acid                             | 135.028073               | 83.9405            | 136.0372             | 13.5291            | C4H8O5<br>C10H14N2O                   | C01620 | [M-H]-    | BioDeepDB | 7.8E-06 | neg   | 2 | 674140779  |
| M242T603                   | Thymidine                                  | 242.175294               | 603.04             | 242.0903             | 2.42517            | 5                                     | C00214 | [M]-      | BioDeepDB | 2E-12   | neg   | 2 | 27588141.1 |
| M127T342                   | Thymine                                    | 127.050428               | 341.802            | 126.0429             | 1.79236            | C5H6N2O2                              | C00178 | [M+H]+    | BioDeepDB | 1.6E-09 | pos   | 2 | 133641940  |
| M151T633                   | Thymol<br>Thyrotropin                      | 151.111307               | 633.476            | 150.1045             | 2.87563            | C10H14O<br>C16H22N6O                  | C09908 | [M+H]+    | MoNA      | 0.76192 | pos   | 1 | 10960922.6 |
| M345T311                   | releasing                                  | 345.163544               | 311.445            | 362.1703             | 1.96475            | 4<br>C15H11I4N                        | C03958 | [M+H-20]+ | BioDeepDB | 0.60266 | pos   | 1 | 4207206.71 |
| M760T426                   | Thyroxine                                  | 759.701028               | 425.909            | 776.6867             | 28.6452            | O4                                    | C01829 | [M+H-20]+ | BioDeepDB | 0.97913 | pos   | 1 | 2063079.37 |

|          |                     |            |         |          |         |           |           |        |           |           |         |     |   |            |
|----------|---------------------|------------|---------|----------|---------|-----------|-----------|--------|-----------|-----------|---------|-----|---|------------|
| M375T352 | Tiagabine           | 375.136047 | 351.663 | 375.1327 | 8.92078 | S2        | C20H25NO2 | C07503 | [M]-      | MoNA      | 0.76245 | neg | 1 | 765284.315 |
| M476T475 | Tiamulin            | 476.311088 | 475.007 | 493.3226 | 8.56127 | S         | C28H47NO4 | C12065 | [M+H-20]+ | MoNA      | 0.99924 | pos | 1 | 3575020.79 |
| M263T453 | Ticlopidine         | 263.054791 | 453.126 | 263.0535 | 4.90828 | S         | C14H14ClN | C07140 | [M]-      | MoNA      | 0.9126  | neg | 1 | 937419.799 |
| M316T423 |                     |            |         |          |         | S         | C13H24N4O |        |           |           |         |     |   |            |
| M741T555 | Timolol             | 316.152792 | 423.199 | 316.1569 | 12.9948 | 3S        |           | C07141 | [M]+      | MoNA      | 0.73702 | pos | 1 | 2269233.86 |
| M741T555 |                     |            |         |          |         |           |           |        |           |           |         |     |   |            |
| M387T252 | Timosaponin AIII    | 741.442714 | 555.358 | 740.4347 | 1.00555 | S         | C39H64O13 | C17075 | [M+H]+    | OTCML     | 0.98774 | pos | 1 | 63847166.5 |
|          |                     |            |         |          |         | S         | C16H13Cl3 |        |           |           |         |     |   |            |
| M387T252 | Tioconazole         | 386.984428 | 251.555 | 385.9814 | 10.9759 | N2OS      |           | C08082 | [M+H]+    | GNPS      | 0.99982 | pos | 1 | 1871930.49 |
|          |                     |            |         |          |         |           |           |        |           |           |         |     |   |            |
| M467T396 | Tobramycin          | 467.253557 | 396.415 | 467.2591 | 11.8623 | 9         | C18H37N5O | C00397 | [M]+      | BioDeepDB | 0.78967 | pos | 1 | 4305707.77 |
| M175T589 | Tocainide           | 175.11865  | 589.053 | 192.1263 | 1.23383 | C11H16N2O |           | C07142 | [M+H-20]+ | GNPS      | 0.77763 | pos | 1 | 4717141.22 |
| M161T211 | Tolazoline          | 161.110915 | 211.288 | 160.1    | 22.2835 | C10H12N2  |           | C07147 | [M+H]+    | MoNA      | 1       | pos | 1 | 87729050.3 |
|          |                     |            |         |          |         | C12H18N2O |           |        |           |           |         |     |   |            |
| M269T308 | Tolbutamide         | 269.09718  | 307.616 | 270.1038 | 2.43882 | 3S        |           | C07148 | [M-H]-    | BioDeepDB | 0.65822 | neg | 1 | 11047017.2 |
|          |                     |            |         |          |         |           |           |        |           |           |         |     |   |            |
| M383T712 | Tolfenpyrad         | 383.141596 | 711.984 | 383.1401 | 3.90504 | 302       | C21H22ClN | C18491 | [M]+      | mzCloud   | 0.72035 | pos | 1 | 10753840   |
| M258T443 | Tolmetin            | 258.111522 | 443.256 | 257.1052 | 3.69518 | C15H15NO3 |           | C07149 | [M+H]+    | mzCloud   | 0.77451 | pos | 1 | 19126432.5 |
| M325T796 | Tolterodine         | 325.239221 | 796.202 | 325.2406 | 4.24001 | C22H31NO  |           | C07750 | [M]-      | BioDeepDB | 0.64772 | neg | 1 | 5294831.54 |
| M135T595 | Toluat              | 135.043505 | 595.35  | 136.0524 | 11.989  | C8H8O2    |           | C01454 | [M-H]-    | mzCloud   | 0.73639 | neg | 1 | 6435424.2  |
|          | Toluene-4-sulfonate |            |         |          |         |           |           |        |           |           |         |     |   |            |
| M172T299 |                     | 172.019608 | 298.619 | 172.0194 | 1.20824 | C7H8O3S   |           | C06677 | [M]-      | MoNA      | 0.98836 | neg | 1 | 1417386.51 |
|          |                     |            |         |          |         | C12H21NO8 |           |        |           |           |         |     |   |            |
| M320T223 | Topiramate          | 320.082337 | 222.943 | 339.0988 | 6.02077 | S         |           | C07502 | [M-20-H]- | GNPS      | 0.63321 | neg | 1 | 759832.161 |
|          |                     |            |         |          |         |           |           |        |           |           |         |     |   |            |
| M421T452 | Topotecan           | 421.162457 | 451.616 | 421.1638 | 3.12026 | 5         | C23H23N3O | C11158 | [M]-      | OTCML     | 0.63473 | neg | 1 | 1243728.82 |
| M330T403 | Tralkoxydim         | 330.200815 | 403.447 | 329.1991 | 16.8399 | C20H27NO3 |           | C18769 | [M+H]+    | BioDeepDB | 1       | pos | 1 | 2090398.09 |
| M264T777 | Tramadol            | 264.194675 | 777.245 | 263.1885 | 4.16904 | C16H25NO2 |           | C07153 | [M+H]+    | mzCloud   | 0.65219 | pos | 1 | 14013641.1 |

| C24H34N2O |                                    |            |         |          |         |                        |        |            |           |         |     |   |            |
|-----------|------------------------------------|------------|---------|----------|---------|------------------------|--------|------------|-----------|---------|-----|---|------------|
| M411T402  | Trandolapril                       | 411.22713  | 402.144 | 430.2468 | 3.04432 | 5                      | C07154 | [M-H2O-H]- | BioDeepDB | 0.99305 | neg | 1 | 244854.623 |
| M158T103  | Tranexamic Acid<br>trans-1,2-      | 158.117075 | 103.423 | 157.1103 | 3.03111 | C8H15N02               | C12535 | [M+H]+     | MoNA      | 0.69523 | pos | 1 | 15085420.7 |
| M97T317   | Cyclohexanediol<br>trans-12-       | 97.0642188 | 316.709 | 116.0837 | 11.2419 | C6H12O2                | C03739 | [M-H2O-H]- | GNPS      | 0.99985 | neg | 1 | 133658.179 |
| M207T810  | Hydroxyjasmonic<br>trans-2-        | 207.1013   | 809.797 | 226.1205 | 3.91226 | C12H18O4               | C21385 | [M-H2O-H]- | GNPS      | 0.99472 | neg | 1 | 773545.959 |
| M165T106  | Hydroxycinnamate                   | 165.054095 | 105.503 | 164.0473 | 2.91284 | C9H8O3                 | C01772 | [M+H]+     | mzCloud   | 0.64738 | pos | 1 | 21743617.6 |
| M157T164  | trans-Aconitate                    | 157.012761 | 163.846 | 174.0164 | 24.1718 | C6H6O6                 | C02341 | [M+H-H2O]+ | mzCloud   | 0.00037 | pos | 2 | 199595563  |
| M147T753  | trans-Cinnamate<br>trans-Cinnamoyl | 146.964304 | 753.315 | 148.0524 | 3.67262 | C9H8O2                 | C00423 | [M-H]-     | BioDeepDB | 3.3E-16 | neg | 2 | 237245718  |
| M309T188  | beta-D-glucoside<br>trans-Ferulic  | 309.092949 | 188.174 | 310.1053 | 16.4183 | C15H18O7               | C04164 | [M-H]-     | MetaDNA   | 0.0341  | neg | 2 | 6501527.51 |
| M193T376  | acid                               | 193.047867 | 376.15  | 194.0579 | 10.3553 | C10H10O4               | C01494 | [M-H]-     | BioDeepDB | 3.1E-15 | neg | 2 | 50643183.1 |
| M371T726  | trans-Piceid<br>trans-Zeatin       | 371.110858 | 725.713 | 390.1315 | 6.06947 | C20H22O8<br>C15H21N5O  | C10275 | [M-H2O-H]- | MoNA      | 0.72266 | neg | 1 | 1329221.36 |
| M332T329  | riboside<br>trans-Zeatin-7-        | 332.134647 | 328.999 | 351.1543 | 3.80167 | 5<br>C16H23N5O         | C16431 | [M-H2O-H]- | MoNA      | 0.99453 | neg | 1 | 4240941.13 |
| M364T448  | beta-D-glucoside                   | 364.157082 | 447.531 | 381.1648 | 0.77997 | 6                      | C16443 | [M+H-H2O]+ | mzCloud   | 0.64243 | pos | 1 | 5813175.24 |
| M211T753  | Traumatic acid                     | 211.131937 | 752.541 | 228.1362 | 15.0175 | C12H20O4<br>C19H22C1N  | C16308 | [M+H-H2O]+ | MetaDNA   | 0.00022 | pos | 2 | 22911219.1 |
| M354T478  | Trazodone                          | 354.144594 | 477.989 | 371.1513 | 2.05552 | 50                     | C07156 | [M+H-H2O]+ | MoNA      | 0.86736 | pos | 1 | 2281231.91 |
| M342T107  | Trehalose<br>Trehalose 6-          | 342.139584 | 106.513 | 342.1162 | 0.09897 | C12H22O11<br>C12H23O14 | C01083 | [M]+       | BioDeepDB | 6.8E-07 | pos | 2 | 2251829100 |
| M421T82   | phosphate                          | 421.072562 | 81.8855 | 422.0825 | 6.32216 | P                      | C00689 | [M-H]-     | MoNA      | 3.5E-05 | neg | 2 | 59881072.1 |
| M509T331  | Tremulacin                         | 509.1448   | 330.552 | 528.1632 | 0.01973 | C27H28O11              | C09973 | [M-H2O-H]- | GNPS      | 0.98442 | neg | 1 | 1083575.28 |
| M253T490  | Trenbolone                         | 253.154011 | 489.826 | 270.162  | 2.19274 | C18H22O2<br>C10H16C13  | C14261 | [M+H-H2O]+ | mzCloud   | 0.67278 | pos | 1 | 3089532.26 |
| M303T341  | Tri-allate                         | 303.002052 | 340.548 | 303.0018 | 0.83177 | NOS                    | C18813 | [M]+       | MoNA      | 0.98719 | pos | 1 | 862772.74  |

|          |                              | C14H16ClN  |         |          |         |                        |        |           |           |         |     |   |            |
|----------|------------------------------|------------|---------|----------|---------|------------------------|--------|-----------|-----------|---------|-----|---|------------|
| M292T350 | Triadimefon<br>Triamcinolone | 292.085848 | 350.108 | 293.0931 | 0.06653 | 302                    | C11156 | [M-H]-    | MoNA      | 0.98459 | neg | 1 | 1793623.1  |
| M434T459 | acetone                      | 434.211149 | 459.324 | 434.2105 | 1.4957  | C24H31F06              | C08183 | [M]-      | BioDeepDB | 0.9892  | neg | 1 | 556383.439 |
| M301T823 | Tricetin                     | 301.035851 | 823.375 | 302.0427 | 1.41863 | C15H1007<br>C7H4Cl3NO  | C10192 | [M-H]-    | BioDeepDB | 0.60024 | neg | 1 | 1531850.37 |
| M256T76  | Trichlopyr                   | 255.937134 | 76.0874 | 254.9257 | 16.2481 | 3                      | C11032 | [M+H]+    | MoNA      | 1       | pos | 1 | 56117576.1 |
| M189T659 | Tricyclazole                 | 189.038869 | 658.953 | 189.0361 | 14.6487 | C9H7N3S                | C18492 | [M]+      | BioDeepDB | 0.86418 | pos | 1 | 6552780.47 |
| M298T791 | Tridemorph                   | 298.308152 | 790.802 | 297.3032 | 7.78906 | C19H39NO               | C11285 | [M+H]+    | mzCloud   | 1.5E-10 | pos | 2 | 67171794.2 |
| M149T350 | Triethanolamine              | 149.107014 | 349.911 | 149.1052 | 12.1658 | C6H15NO3               | C06771 | [M]+      | MoNA      | 0.79421 | pos | 1 | 3459013.82 |
| M102T57  | Triethylamine                | 102.062779 | 57.4179 | 101.1204 | 12.901  | C6H15N<br>C15H10ClF    | C14691 | [M+H]+    | BioDeepDB | 0.18803 | pos | 2 | 2722867.54 |
| M359T210 | Triflumuron                  | 359.044266 | 210.186 | 358.0332 | 10.5441 | 3N203<br>C13H16F3N     | C18615 | [M+H]+    | MoNA      | 0.99976 | pos | 1 | 1287993.59 |
| M318T228 | Trifluralin                  | 318.099794 | 227.633 | 335.1093 | 6.51429 | 304                    | C14343 | [M+H-20]+ | MoNA      | 0.99801 | pos | 1 | 1023586.88 |
| M427T497 | Trifolirhizin                | 427.095848 | 496.646 | 446.1213 | 16.5275 | C22H22O10              | C10538 | [M-20-H]- | OTCML     | 0.93325 | neg | 1 | 277954.417 |
| M302T563 | Trihexyphenidyl              | 302.255173 | 563.297 | 301.2406 | 24.1427 | C20H31NO               | C07171 | [M+H]+    | BioDeepDB | 0.97317 | pos | 1 | 7934230.01 |
| M330T706 | Trilostane                   | 330.202208 | 706.229 | 329.1991 | 12.6026 | C20H27NO3              | C12580 | [M+H]+    | GNPS      | 0.8068  | pos | 1 | 6640691.9  |
| M298T219 | Trimeprazine<br>Trimipramine | 298.150004 | 219.233 | 298.1504 | 1.32818 | C18H22N2S<br>C20H26N2. | C07172 | [M]+      | BioDeepDB | 0.59132 | pos | 1 | 109623440  |
| M294T588 | maleate                      | 294.210825 | 587.521 | 410.2206 | 4.16836 | C4H4O4                 | C14029 | [M]+      | mzCloud   | 0.08057 | pos | 2 | 10117877.6 |
| M252T180 | Trinexapac-ethyl             | 252.097006 | 179.75  | 252.0998 | 10.9787 | C13H16O5               | C18541 | [M]+      | mzCloud   | 0.86655 | pos | 1 | 14015188.1 |
| M227T279 | Trinitrotoluene              | 227.018671 | 278.627 | 227.0178 | 3.68107 | C7H5N3O6               | C16391 | [M]-      | MoNA      | 0.99431 | neg | 1 | 441265.805 |
| M228T104 | Trioxsalen<br>Triphenyl      | 228.085357 | 104.493 | 228.0786 | 29.6255 | C14H12O3               | C09314 | [M]+      | BioDeepDB | 1       | pos | 1 | 60806569.4 |
| M326T263 | phosphate                    | 326.070249 | 262.529 | 326.0708 | 1.67526 | C18H15O4P              | C14235 | [M]+      | mzCloud   | 0.86314 | pos | 1 | 21305686.7 |



|          |                            |            |         |          |         |                        |        |                   |           |         |       |   |            |
|----------|----------------------------|------------|---------|----------|---------|------------------------|--------|-------------------|-----------|---------|-------|---|------------|
| M156T411 | Tris(1-aziridinyl)phosph   | 156.065087 | 410.542 | 173.0718 | 4.62206 | C6H12N3OP              | C19543 | [M+H-H2O]+        | mzCloud   | 0.74839 | pos   | 1 | 10536776.7 |
| M381T694 | Tris(butoxyethyl)phosphate | 381.230115 | 693.81  | 398.2433 | 15.0848 | C18H39O7P              | C14446 | [M+H-H2O]+        | mzCloud   | 0.87703 | pos   | 1 | 2861495.58 |
| M165T686 | Tropate                    | 165.053154 | 686.047 | 166.063  | 15.4283 | C9H10O3                | C01456 | [M-H]-            | BioDeepDB | 0.84937 | neg   | 1 | 29059053.4 |
| M142T324 | Tropine                    | 142.122497 | 323.984 | 141.1154 | 1.25674 | C8H15NO<br>C17H20N2O   | C00729 | [M+H]+            | mzCloud   | 0.83331 | pos   | 1 | 5159245.26 |
| M267T392 | Tropisetron                | 267.144316 | 391.678 | 284.1525 | 2.80801 | 2                      | C13666 | [M+H-H2O]+        | GNPS      | 0.99253 | pos   | 1 | 93959523.9 |
| M161T416 | Tryptamine                 | 161.107149 | 416.239 | 160.1    | 0.78897 | C10H12N2               | C00398 | [M+H]+            | BioDeepDB | 0.58912 | pos   | 1 | 7537520.8  |
| M231T659 | Tryptanthrine              | 231.049304 | 658.953 | 248.0586 | 8.05993 | C15H8N2O2<br>C11H12N2O | C10742 | [M+H-H2O]+        | GNPS      | 0.99902 | pos   | 1 | 241833687  |
| M205T509 | Tryptophan                 | 205.096626 | 508.883 | 204.0899 | 2.68026 | 2                      | C00806 | [M+H]+            | mzCloud   | 0.63993 | pos   | 1 | 3211350.35 |
| M144T443 | Tryptophanol               | 144.080462 | 443.256 | 161.0841 | 26.3483 | C10H11NO<br>C37H41N2O  | C00955 | [M+H-H2O]+<br>[M- | BioDeepDB | 0.00162 | pos   | 2 | 104143991  |
| M609T746 | Tubocurarine               | 609.307605 | 745.603 | 609.2965 | 15.951  | 6                      | C07547 | H2O+NH4]+         | BioDeepDB | 0.80499 | pos   | 1 | 12561006.5 |
| M99T180  | Tulipalin A                | 99.0438837 | 179.75  | 98.0368  | 1.73374 | C5H6O2                 | C20578 | [M+H]+            | MoNA      | 0.98987 | pos   | 1 | 83605177.6 |
| M325T172 | Turanose                   | 325.110495 | 171.935 | 342.1162 | 5.31671 | C12H22O11              | C19636 | [M+H-H2O]+        | BioDeepDB | 0.68539 | pos   | 1 | 744111667  |
| M369T835 | TxB2                       | 369.238808 | 835.329 | 370.2355 | 28.5584 | C20H34O6               | C05963 | [M-H]-            | MoNA      |         | 1 neg | 1 | 1824361.5  |
| M138T245 | Tyramine                   | 138.090872 | 245.199 | 137.0841 | 3.64735 | C8H11NO                | C00483 | [M+H]+            | BioDeepDB | 1.1E-07 | pos   | 2 | 110467499  |
| M196T592 | Tyrosine methylester       | 196.095295 | 592.067 | 195.0895 | 7.55279 | C10H13NO3              | C03404 | [M+H]+            | MoNA      | 0.03554 | pos   | 2 | 48157997.4 |
| M121T245 | Tyrosol                    | 121.064418 | 245.199 | 138.0681 | 5.14524 | C8H10O2<br>C19H26C12   | C06044 | [M+H-H2O]+        | BioDeepDB | 4.4E-10 | pos   | 2 | 198354816  |
| M368T323 | U50488                     | 368.143673 | 322.536 | 368.1422 | 3.95049 | N2O<br>C14H18O4(       | C11796 | [M]+              | mzCloud   | 0.73178 | pos   | 1 | 2348210.65 |
| M319T233 | Ubiquinone-1               | 319.185673 | 233.081 | NULL     | 14.7632 | C5H8)n                 | C00399 | [M+H]+            | MoNA      | 0.7212  | pos   | 1 | 4167480.8  |
| M163T427 | Umbelliferone              | 163.039346 | 427.362 | 162.0317 | 2.27072 | C9H6O3                 | C09315 | [M+H]+            | mzCloud   | 0.60706 | pos   | 1 | 29545974.9 |

|            |                                     |            |         |          |         |                        |        |            |           |         |     |   |            |
|------------|-------------------------------------|------------|---------|----------|---------|------------------------|--------|------------|-----------|---------|-----|---|------------|
| M323T100   | UMP                                 | 323.027332 | 100.283 | 324.0359 | 0.71931 | C9H13N2O9<br>P         | C00105 | [M-H]-     | BioDeepDB | 0.60361 | neg | 1 | 7700933.23 |
| M349T311   | Uncarine C                          | 349.159258 | 310.626 | 368.1736 | 11.5928 | C21H24N2O              | C17595 | [M-H2O-H]- | MoNA      | 0.99988 | neg | 1 | 2653165.05 |
| M187T46_1  | Undecanoic acid                     | 186.955386 | 46.447  | 186.162  | 4.97939 | C11H22O2<br>C15H18ClN  | C17715 | [M+H]+     | BioDeepDB | 0.00166 | pos | 2 | 295909920  |
| M274T638   | Uniconazole P                       | 274.105949 | 637.996 | 291.1138 | 1.52164 | 30                     | C18494 | [M+H-H2O]+ | BioDeepDB | 0.98928 | pos | 1 | 6628465.32 |
| M113T266   | Uracil                              | 113.022093 | 265.624 | 112.0273 | 13.6487 | C4H4N2O2               | C00106 | [M+H]+     | BioDeepDB | 0.00012 | pos | 2 | 146196416  |
| M157T133   | Uracil 5-carboxylate                | 156.965634 | 133.259 | 156.0171 | 1.67171 | C5H4N2O4<br>C8H11C12N  | C03030 | [M+H]+     | BioDeepDB | 0.64487 | pos | 1 | 3099429.85 |
| M250T364   | Uracil mustard Ureidopropionic acid | 250.019084 | 363.928 | 251.0228 | 13.9369 | 302                    | C11686 | [M-H]-     | BioDeepDB | 0.99379 | neg | 1 | 2027219.53 |
| M115T241   | Uric acid                           | 115.046058 | 241.368 | 132.0535 | 0.07381 | C4H8N2O3               | C02642 | [M+H-H2O]+ | MetaDNA   | 2.9E-05 | pos | 2 | 24536614.2 |
| M168T215   | Uridine                             | 168.028407 | 215.4   | 168.0283 | 0.63932 | C5H4N4O3               | C00366 | [M]-       | BioDeepDB | 6E-07   | neg | 2 | 7648841.62 |
| M243T209_2 | Uridine                             | 243.061976 | 209.472 | 244.0695 | 0.1685  | C9H12N2O6<br>C15H22N2O | C00299 | [M-H]-     | BioDeepDB | 5.9E-07 | neg | 2 | 307571857  |
| M647T741_2 | Uridine diphosphate                 | 647.446915 | 741.302 | 580.0343 | 14.0223 | 18P2<br>C17H27N3O      | C00167 | [M+H]+     | BioDeepDB | 0.81261 | pos | 1 | 1656228.02 |
| M607T436   | Uridine diphosphate-N-              | 607.35956  | 436.069 | 607.3537 | 9.64897 | 17P2                   | C00043 | [M]+       | mzCloud   | 0.78633 | pos | 1 | 1320590.89 |
| M137T205_2 | Urocanic acid                       | 137.034095 | 204.895 | 138.0429 | 3.73597 | C6H6N2O2               | C00785 | [M-H]-     | BioDeepDB | 0.00011 | neg | 2 | 3995650.02 |
| M393T504   | Ursodeoxycholic acid                | 393.210182 | 504.466 | 392.2927 | 1.89101 | C24H40O4               | C07880 | [M+H]+     | BioDeepDB | 0.63641 | pos | 1 | 2320482.71 |
| M439T711   | Ursolic acid                        | 439.353357 | 710.534 | 456.3603 | 1.11781 | C30H48O3               | C08988 | [M+H-H2O]+ | mzCloud   | 2.3E-10 | pos | 2 | 34046039.8 |
| M103T393   | Valeric acid                        | 103.074569 | 392.715 | 102.0681 | 7.82975 | C5H10O2<br>C8H18NO4P   | C00803 | [M+H]+     | BioDeepDB | 0.86673 | pos | 1 | 1924223.59 |
| M287T562   | Vamidothion                         | 287.043016 | 561.624 | 287.0415 | 5.28189 | S2                     | C18666 | [M]-       | GNPS      | 0.99674 | neg | 1 | 4476951.01 |
| M167T243   | Vanillic acid                       | 167.034607 | 243.386 | 168.0423 | 2.4936  | C8H8O4                 | C06672 | [M-H]-     | BioDeepDB | 4.1E-05 | neg | 2 | 17724458.3 |
| M151T343   | Vanillin                            | 151.037794 | 342.819 | 152.0473 | 13.9462 | C8H8O3                 | C00755 | Unknown    | OTCML     | 0.74031 | neg | 1 | 3577409.7  |

|                      |                       |            |         |          |         |                        |        |                              |           |             |   |            |
|----------------------|-----------------------|------------|---------|----------|---------|------------------------|--------|------------------------------|-----------|-------------|---|------------|
| M199T572             | Vanillylmandelic acid | 199.030327 | 571.523 | 198.0528 | 5.40481 | C9H10O5                | C05584 | [M+H] <sup>+</sup>           | BioDeepDB | 1.1E-13 pos | 2 | 65035632   |
| M184T88              | Vanylglycol           | 184.072609 | 87.6739 | 184.0736 | 5.38403 | C9H12O4                | C05594 | [M] <sup>+</sup>             | BioDeepDB | 0.73359 pos | 1 | 127680281  |
| M278T811             | Venlafaxine           | 278.206994 | 811.413 | 277.2042 | 16.0345 | C17H27N02<br>C27H38N2O | C07187 | [M+H] <sup>+</sup>           | MoNA      | 0.75058 pos | 1 | 12606989.6 |
| M435T626             | Verapamil             | 435.26692  | 626.183 | 454.2832 | 4.84744 | 4                      | C07188 | [M-H2O-H] <sup>-</sup>       | BioDeepDB | 0.79026 neg | 1 | 1143852.15 |
| M410T614<br>M656T478 | Veratramine           | 410.302913 | 614.215 | 409.2981 | 6.00308 | C27H39N02<br>C36H51N01 | C10829 | [M+H] <sup>+</sup>           | mzCloud   | 0.76329 pos | 1 | 4949557.6  |
| _2                   | Veratridine           | 656.341759 | 477.989 | 673.3462 | 4.56078 | 1                      | C06544 | [M+H-2O] <sup>+</sup>        | BioDeepDB | 0.99577 pos | 1 | 93835911   |
| M387T408             | Verbenalin            | 387.128844 | 408.368 | 388.1369 | 2.13706 | C17H24O10<br>C27H33N3O | C09802 | [M-H] <sup>-</sup>           | OTCML     | 0.22506 neg | 2 | 8696770.63 |
| M494T568             | Verruculogen          | 494.222267 | 568.464 | 511.2319 | 4.44987 | 7                      | C20045 | [M+H-2O] <sup>+</sup>        | MoNA      | 0.9956 pos  | 1 | 2560861.67 |
| M244T611<br>M594T218 | Verruculotoxin        | 244.162309 | 610.742 | 244.1576 | 19.2853 | C15H20N2O              | C10624 | [M] <sup>-</sup>             | MoNA      | 1 neg       | 1 | 1396683.34 |
| _2                   | Vicenin 2             | 594.156983 | 218.43  | 594.1585 | 2.50211 | C27H30O15<br>C10H16N4O | C10195 | [M] <sup>-</sup>             | OTCML     | 0.7603 neg  | 1 | 520078.077 |
| M304T104<br>_1       | Vicine                | 304.101476 | 104.493 | 304.1019 | 1.39203 | 7<br>C10H13N5O         | C08437 | [M] <sup>+</sup>             | OTCML     | 0.63087 pos | 1 | 52145468   |
| M285T196             | Vidarabine            | 285.108167 | 195.791 | 285.1073 | 3.0399  | 4. H2O                 | C07195 | [M] <sup>-</sup>             | BioDeepDB | 0.62442 neg | 1 | 1149424.83 |
| M130T256             | Vigabatrin            | 130.085371 | 255.723 | 129.079  | 6.79226 | C6H11N02<br>C46H58N4O  | C07500 | [M+H] <sup>+</sup>           | MoNA      | 0.66237 pos | 1 | 30441786.5 |
| M908T715<br>M905T792 | Vinblastine sulfate   | 908.410545 | 715.011 | 908.3878 | 2.11445 | 9. H2SO4<br>C46H58N4O  | C11626 | [M-<br>H2O+NH4] <sup>+</sup> | MoNA      | 0.99088 pos | 1 | 1510385.17 |
| _1                   | Vincristine sulfate   | 905.380734 | 792.146 | 922.367  | 23.3542 | 14S<br>C25H32N2O       | C13974 | [M+H-2O] <sup>+</sup>        | OTCML     | 0.82586 pos | 1 | 4325669.86 |
| M457T521<br>M822T452 | Vindoline             | 457.242702 | 520.739 | 456.226  | 20.6153 | 6<br>C43H49N7O         | C01626 | [M+H] <sup>+</sup>           | mzCloud   | 0.77688 pos | 1 | 17090455.3 |
| _1                   | Virginiamycin         | 822.350533 | 451.616 | 823.3541 | 4.51005 | 10                     | C11269 | [M-H] <sup>-</sup>           | BioDeepDB | 0.90951 neg | 1 | 276259.429 |
| M433T614             | Vitamin K1            | 433.345645 | 614.215 | 450.3498 | 7.5676  | C31H46O2               | C02059 | [M+H-2O] <sup>+</sup>        | BioDeepDB | 0.83018 pos | 1 | 13741405.5 |
| M432T130             | Vitexin               | 432.097305 | 129.827 | 432.1056 | 19.3048 | C21H20O10              | C01460 | [M] <sup>-</sup>             | OTCML     | 0.99251 neg | 1 | 12922148.2 |

|          |                  |            |         |          |         |    |           |        |            |           |         |     |   |            |
|----------|------------------|------------|---------|----------|---------|----|-----------|--------|------------|-----------|---------|-----|---|------------|
| M703T665 |                  |            |         |          |         |    | C43H52N4O |        |            |           |         |     |   |            |
| _1       | Voacamine        | 703.379258 | 664.565 | 704.3938 | 10.2891 | 5  |           | C09252 | [M-H]-     | MoNA      | 0.81815 | neg | 1 | 1136701.95 |
| M296T509 | Vomitoxin        | 296.127072 | 508.883 | 296.126  | 3.61959 |    | C15H20O6  | C09747 | [M]+       | mzCloud   | 0.6541  | pos | 1 | 1450148.18 |
| M350T537 | Voriconazole     | 350.12438  | 536.761 | 349.115  | 6.00894 | 50 | C16H14F3N | C07622 | [M+H]+     | mzCloud   | 0.80221 | pos | 1 | 1457153.97 |
| M263T736 | Vulgarin         | 263.128445 | 736.458 | 264.1362 | 1.66373 |    | C15H20O4  | C09600 | [M-H]-     | GNPS      | 0.66698 | neg | 1 | 1553377.74 |
| M339T548 | Vulgaxanthin I   | 339.106487 | 548.114 | 339.1067 | 0.62868 | 7  | C14H17N3O | C08568 | [M]+       | MoNA      | 0.80147 | pos | 1 | 60560205.7 |
| M323T275 | Vulgaxanthin II  | 323.082432 | 274.968 | 340.0907 | 2.58122 | 8  | C14H16N2O | C08569 | [M+H-H2O]+ | MoNA      | 0.99202 | pos | 1 | 98926425.4 |
| M291T533 | Warfarin         | 291.096643 | 532.526 | 308.1049 | 2.82653 |    | C19H16O4  | C01541 | [M+H-H2O]+ | mzCloud   | 0.73111 | pos | 1 | 51418476.5 |
| M295T438 | Wedelolactone    | 295.024115 | 437.734 | 314.0427 | 0.50091 |    | C16H10O7  | C10541 | [M-H2O-H]- | OTCML     | 0.8467  | neg | 1 | 1121128.24 |
| M285T207 | Wogonin          | 285.078899 | 207.393 | 284.0685 | 10.9551 |    | C16H12O5  | C10197 | [M+H]+     | mzCloud   | 0.94165 | pos | 1 | 3180741.83 |
| M153T190 | Xanthine         | 153.040118 | 189.571 | 152.0334 | 3.64419 |    | C5H4N4O2  | C00385 | [M+H]+     | BioDeepDB | 0.00013 | pos | 2 | 61466118.9 |
| M335T416 | Xanthohumol      | 335.130023 | 416.128 | 354.1467 | 5.11062 |    | C21H22O5  | C16417 | [M-H2O-H]- | BioDeepDB | 0.66382 | neg | 1 | 545591.328 |
| M238T412 | Xanthopterin-B2  | 238.069671 | 411.838 | 238.0702 | 2.22083 |    | C9H10N4O4 | C02333 | [M]+       | mzCloud   | 0.70831 | pos | 1 | 120636897  |
| M283T235 | Xanthosine       | 283.06282  | 234.972 | 284.0757 | 19.7982 | 6  | C10H12N4O | C01762 | [M-H]-     | mzCloud   | 0.00076 | neg | 2 | 1184449.76 |
| M185T757 | Xanthotoxol      | 185.022648 | 757.001 | 202.0266 | 18.768  |    | C11H6O4   | C00841 | [M+H-H2O]+ | OTCML     | 0.86366 | pos | 1 | 6328266.54 |
| M195T293 | Xanthoxylin      | 195.064942 | 292.621 | 196.0736 | 6.87245 |    | C10H12O4  | C10726 | [M-H]-     | MoNA      | 0.69239 | neg | 1 | 1836792.86 |
| M206T323 | Xanthurenic acid | 206.04388  | 322.536 | 205.0375 | 3.94704 |    | C10H7N04  | C02470 | [M+H]+     | BioDeepDB | 0.61623 | pos | 1 | 8202368.8  |
| M363T71  | Xanthylic acid   | 363.034682 | 70.607  | 364.042  | 0.11599 | 9P | C10H13N4O | C00655 | [M-H]-     | BioDeepDB | 0.57997 | neg | 1 | 6399815.51 |
| M244T791 | Xylometazoline   | 244.189967 | 790.802 | 244.1939 | 16.1057 |    | C16H24N2  | C07913 | [M]+       | MoNA      | 0.76844 | pos | 1 | 12585038   |
| M241T325 | Yangonin         | 241.081295 | 325.35  | 258.0892 | 1.99241 |    | C15H14O4  | C09980 | [M+H-H2O]+ | OTCML     | 0.86801 | pos | 1 | 2529732.78 |

|          |              |            |         |          |         |           |           |                       |                       |         |         |     |            |            |
|----------|--------------|------------|---------|----------|---------|-----------|-----------|-----------------------|-----------------------|---------|---------|-----|------------|------------|
| M354T462 | Yohimbine    | 354.19023  | 461.845 | 354.1943 | 11.4907 | 3         | C21H26N2O | C09256                | [M] <sup>+</sup>      | mzCloud | 0.74608 | pos | 1          | 2643104.79 |
| M575T625 | Zafirlukast  | 575.20583  | 624.608 | 575.209  | 5.5105  | 6S        | C31H33N3O | C07206                | [M] <sup>+</sup>      | GNPS    | 0.79914 | pos | 1          | 1627006.68 |
| M194T614 | Zalcitabine  | 194.089391 | 614.215 | 211.0957 | 5.7954  | C9H13N3O3 | C07207    | [M+H-20] <sup>+</sup> | MoNA                  | 0.81064 | pos     | 1   | 2415324.6  |            |
| M306T574 | Zaleplon     | 306.132144 | 574.363 | 305.1277 | 9.00349 | C17H15N5O | C07484    | [M+H] <sup>+</sup>    | BioDeepDB             | 0.87547 | pos     | 1   | 5068823.12 |            |
| M219T787 | Zerumbone    | 219.173736 | 786.569 | 218.1671 | 2.91811 | C15H22O   | C20262    | [M+H] <sup>+</sup>    | mzCloud               | 0.627   | pos     | 1   | 22719134.9 |            |
| M195T451 | Zingerone    | 195.10124  | 450.503 | 194.0943 | 1.72468 | C11H14O3  | C17497    | [M+H] <sup>+</sup>    | BioDeepDB             | 0.60477 | pos     | 1   | 4202847.93 |            |
| M244T317 | Zinnimidine  | 244.128474 | 317.199 | 261.1365 | 2.42397 | C15H19NO3 | C10626    | [M+H-20] <sup>+</sup> | GNPS                  | 0.99165 | pos     | 1   | 12590256.1 |            |
| M266T751 | Zinniol      | 266.150208 | 751.333 | 266.1518 | 5.98065 | C15H22O4  | C10840    | [M] <sup>+</sup>      | MoNA                  | 0.99752 | pos     | 1   | 7827366.45 |            |
| M413T653 | Ziprasidone  | 413.121159 | 653.147 | 412.1125 | 3.34867 | 40S       | C21H21C1N | C07568                | [M+H] <sup>+</sup>    | mzCloud | 0.67085 | pos | 1          | 6032025.73 |
| M270T304 | Zolmitriptan | 270.154763 | 303.513 | 287.1634 | 4.45275 | 2         | C16H21N3O | C07218                | [M+H-20] <sup>+</sup> | GNPS    | 0.9956  | pos | 1          | 16917132.4 |
| M290T499 | Zolpidem     | 290.160429 | 498.645 | 307.1685 | 2.19629 | C19H21N3O | C07219    | [M+H-20] <sup>+</sup> | MoNA                  | 0.85526 | pos     | 1   | 1831596.23 |            |
| M211T143 | Zonisamide   | 211.018343 | 143.174 | 212.0256 | 0.08885 | C8H8N2O3S | C07504    | [M-H] <sup>-</sup>    | BioDeepDB             | 0.63384 | neg     | 1   | 1439966.58 |            |
| M476T461 | Zygadenine   | 476.296373 | 460.537 | 493.304  | 0.40575 | C27H43NO7 | C10831    | [M+H-20] <sup>+</sup> | MoNA                  | 0.98578 | pos     | 1   | 15191440.7 |            |

Table S6 LC-MS Analysis of Metabolome\_pos

| ID       | mz | rt          | 引火汤     |
|----------|----|-------------|---------|
| M81T293  |    | 81.03292611 | 292.623 |
| M81T106  |    | 81.03268728 | 105.503 |
| M81T651  |    | 81.03313021 | 650.898 |
| M81T143  |    | 81.03275083 | 142.85  |
| M81T94   |    | 81.03300142 | 93.7378 |
| M81T359  |    | 81.03279881 | 359.32  |
| M81T659  |    | 81.0331072  | 658.953 |
| M81T68   |    | 81.05252081 | 68.0903 |
| M81T35   |    | 81.05256403 | 34.5397 |
| M81T563  |    | 81.06898177 | 563.297 |
| M81T649  |    | 81.06922381 | 649.338 |
| M81T818  |    | 81.06915154 | 818.418 |
| M81T703  |    | 81.0689693  | 703.35  |
| M81T545  |    | 81.06893138 | 545.203 |
| M82T353  |    | 81.52014057 | 352.65  |
| M82T497  |    | 81.51920514 | 497.214 |
| M82T794  |    | 81.51893832 | 793.649 |
| M82T432  |    | 81.51967147 | 431.64  |
| M82T665  |    | 81.51910617 | 664.745 |
| M82T626  |    | 81.51955246 | 626.042 |
| M82T346  |    | 81.5201752  | 345.848 |
| M82T688  |    | 81.51972782 | 687.95  |
| M82T388  |    | 81.51962863 | 387.763 |
| M82T807  |    | 81.51925617 | 807.232 |
| M82T469  |    | 81.51918393 | 469.252 |
| M82T676  |    | 81.51909774 | 675.866 |
| M82T698  |    | 81.51969674 | 697.952 |
| M82T572  |    | 81.51920168 | 571.523 |
| M82T709  |    | 81.52010415 | 709.106 |
| M82T488  |    | 81.51923818 | 488.437 |
| M82T728  |    | 81.51975774 | 728.25  |
| M82T75_1 |    | 81.51977623 | 74.9588 |
| M82T533  |    | 81.51941838 | 532.526 |
| M82T458  |    | 81.51938674 | 457.576 |
| M82T218  |    | 81.52016341 | 217.866 |
| M82T756  |    | 81.52011998 | 755.537 |
| M82T507  |    | 81.51949135 | 507.343 |
| M82T827  |    | 81.51968142 | 827.271 |
| M82T279  |    | 81.52014399 | 279.039 |
| M82T316  |    | 81.52017276 | 315.701 |
| M82T364  |    | 81.52014344 | 363.58  |
| M82T402  |    | 81.51964867 | 401.963 |
| M82T448  |    | 81.51949142 | 447.531 |
| M82T480  |    | 81.51921202 | 479.527 |
| M82T148  |    | 81.52018427 | 148.117 |
| M82T35_1 |    | 81.51966584 | 34.5397 |
| M82T783  |    | 81.51916978 | 782.558 |
| M82T381  |    | 81.52019135 | 380.63  |
| M82T299  |    | 81.52018855 | 299.493 |
| M82T60   |    | 82.01326001 | 59.9075 |
| M82T190  |    | 82.01343624 | 189.571 |
| M82T135  |    | 82.01349998 | 134.574 |

|          |              |          |              |
|----------|--------------|----------|--------------|
| M82T75_2 | 82. 01326878 | 74. 9588 | 2132200229   |
| M82T644  | 82. 02148841 | 643. 727 | 11722750. 18 |
| M82T785  | 82. 02134278 | 785. 136 | 7876975. 837 |
| M82T636  | 82. 02149338 | 636. 473 | 11201136. 89 |
| M82T711  | 82. 02123391 | 710. 534 | 26765742. 61 |
| M82T46   | 82. 02181698 | 46. 447  | 7509827. 258 |
| M82T628  | 82. 02150079 | 627. 58  | 22475125. 46 |
| M82T751  | 82. 02075755 | 751. 333 | 12864951. 08 |
| M82T611  | 82. 02145303 | 611. 145 | 15793740. 09 |
| M82T35_2 | 82. 02168542 | 34. 5397 | 17883369. 25 |
| M82T528  | 82. 0648058  | 528. 185 | 2312230. 274 |
| M83T75_1 | 82. 53660885 | 74. 9588 | 4649696981   |
| M83T75_2 | 83. 01368856 | 74. 9588 | 264558724    |
| M83T61   | 83. 03759538 | 61. 1538 | 8913669. 068 |
| M83T75_3 | 83. 03762675 | 74. 9588 | 850276427. 5 |
| M83T216  | 83. 03760629 | 216. 359 | 2889601. 084 |
| M83T595  | 83. 03753213 | 595. 066 | 2604410. 671 |
| M83T35   | 83. 03790593 | 34. 5397 | 1799580. 459 |
| M83T44   | 83. 03758649 | 44. 1485 | 3565275. 65  |
| M83T144  | 83. 04882936 | 143. 959 | 21608922. 93 |
| M83T558  | 83. 04863009 | 557. 967 | 8334929. 552 |
| M83T106  | 83. 04886251 | 105. 503 | 45319104. 95 |
| M83T393  | 83. 04866069 | 392. 715 | 11401807. 49 |
| M83T181  | 83. 04871737 | 181. 154 | 9845294. 721 |
| M83T339  | 83. 04875676 | 339. 085 | 9584207. 231 |
| M83T92   | 83. 04880802 | 91. 7174 | 46727249. 55 |
| M83T600  | 83. 06021029 | 599. 621 | 392566773. 2 |
| M83T791  | 83. 06020749 | 790. 802 | 494424585. 6 |
| M83T830  | 83. 06016871 | 830. 193 | 326137321. 1 |
| M83T750  | 83. 05997492 | 749. 96  | 358175440. 5 |
| M83T669  | 83. 0601729  | 668. 867 | 328559470. 1 |
| M83T475  | 83. 0600386  | 475. 007 | 204482355. 9 |
| M83T660  | 83. 06019088 | 660. 455 | 441689796. 6 |
| M83T647  | 83. 06022294 | 646. 794 | 417108493. 6 |
| M83T816  | 83. 05997752 | 815. 517 | 399517354. 8 |
| M83T728  | 83. 0599768  | 728. 25  | 316423010. 1 |
| M83T838  | 83. 05999928 | 837. 524 | 224954811. 3 |
| M83T623  | 83. 05998964 | 623. 11  | 298153386    |
| M83T736  | 83. 05999193 | 735. 7   | 321769803. 7 |
| M83T516  | 83. 06021529 | 516. 214 | 291309017. 5 |
| M83T531  | 83. 06022814 | 531. 127 | 365790636. 1 |
| M83T544  | 83. 05999607 | 544. 056 | 408039576. 8 |
| M83T96   | 83. 06001922 | 95. 7572 | 32401468. 32 |
| M83T823  | 83. 06021787 | 822. 881 | 318703013. 7 |
| M83T506  | 83. 05999938 | 505. 855 | 238380866. 7 |
| M83T683  | 83. 06016916 | 683. 436 | 360045369. 6 |
| M83T633  | 83. 06018406 | 633. 476 | 387277234. 3 |
| M83T758  | 83. 06016893 | 758. 236 | 385827324. 9 |
| M83T703  | 83. 05998029 | 703. 35  | 1033967828   |
| M83T780  | 83. 06021038 | 780. 043 | 363639160    |
| M83T487  | 83. 06002703 | 486. 885 | 228935658. 4 |
| M83T610  | 83. 06020184 | 609. 592 | 282777744. 9 |
| M83T772  | 83. 06022955 | 772. 206 | 304758322. 4 |
| M83T800  | 83. 06017959 | 800. 484 | 415046569. 8 |

|           |              |           |              |
|-----------|--------------|-----------|--------------|
| M83T573   | 83. 06021793 | 573. 072  | 822905322. 7 |
| M83T563   | 83. 08493811 | 563. 297  | 5377974. 119 |
| M83T114   | 83. 08518961 | 114. 15   | 2231178. 417 |
| M83T777   | 83. 08443474 | 777. 245  | 7435469. 244 |
| M83T133   | 83. 08517631 | 133. 259  | 7263586. 127 |
| M83T384   | 83. 08519365 | 383. 536  | 5249427. 338 |
| M84T570   | 83. 5164396  | 570. 01   | 3930124. 87  |
| M84T38    | 83. 53548317 | 38. 3208  | 2388725. 419 |
| M84T44    | 83. 53546911 | 44. 1485  | 6417591. 483 |
| M84T57    | 83. 5354752  | 57. 4179  | 8663845. 251 |
| M84T598   | 83. 53559609 | 598. 125  | 3458191. 66  |
| M84T75_1  | 83. 53535998 | 74. 9588  | 978396415. 3 |
| M84T75_2  | 84. 01090054 | 74. 9588  | 311755904. 1 |
| M84T160   | 84. 04388939 | 159. 6335 | 66531306. 48 |
| M84T809   | 84. 04382936 | 808. 678  | 34065091. 87 |
| M84T662   | 84. 0438412  | 661. 979  | 46133057. 08 |
| M84T311   | 84. 04382098 | 311. 445  | 88314121. 44 |
| M84T582   | 84. 04387853 | 581. 625  | 27862951. 33 |
| M84T574   | 84. 04385881 | 574. 363  | 27962860. 24 |
| M84T117   | 84. 0437929  | 116. 689  | 48190107. 73 |
| M84T764   | 84. 04386374 | 763. 856  | 31976867. 2  |
| M84T603   | 84. 04384308 | 602. 513  | 38181667. 81 |
| M84T409   | 84. 04380122 | 409. 271  | 36607827. 73 |
| M84T392   | 84. 04386209 | 391. 678  | 45516995. 65 |
| M84T649   | 84. 04382521 | 649. 338  | 33657929. 97 |
| M84T705_1 | 84. 04385211 | 704. 715  | 43569833. 56 |
| M84T432   | 84. 04387373 | 431. 64   | 31355064. 45 |
| M84T78_1  | 84. 04409109 | 78. 3841  | 48145578. 17 |
| M84T558   | 84. 04386082 | 557. 967  | 46558016. 78 |
| M84T110_1 | 84. 04412475 | 110. 047  | 77871826. 66 |
| M84T325   | 84. 04387962 | 325. 35   | 69194105. 44 |
| M84T475   | 84. 04381431 | 475. 007  | 34531279. 38 |
| M84T757   | 84. 04388104 | 757. 001  | 29099289. 37 |
| M84T682   | 84. 04385883 | 681. 885  | 42980116. 97 |
| M84T830   | 84. 04385688 | 830. 193  | 49274225. 87 |
| M84T129   | 84. 04377435 | 129. 234  | 81547256. 3  |
| M84T623   | 84. 04388084 | 623. 11   | 32744083. 78 |
| M84T516   | 84. 04379481 | 516. 214  | 45361140. 53 |
| M84T544   | 84. 04385571 | 544. 056  | 51918780. 06 |
| M84T210   | 84. 04407963 | 210. 186  | 86104490. 46 |
| M84T418   | 84. 0438657  | 417. 676  | 35029251     |
| M84T642   | 84. 04381688 | 642. 211  | 28181598. 03 |
| M84T733   | 84. 04385957 | 732. 773  | 87976032. 15 |
| M84T401   | 84. 04387836 | 400. 59   | 34721941. 27 |
| M84T488   | 84. 04387011 | 488. 437  | 28689593. 49 |
| M84T672   | 84. 04387775 | 671. 649  | 36004915. 38 |
| M84T218   | 84. 04381126 | 217. 866  | 68995592. 98 |
| M84T802   | 84. 04384421 | 801. 685  | 27324133. 17 |
| M84T381   | 84. 04383165 | 380. 63   | 44000817. 96 |
| M84T455   | 84. 04386489 | 454. 739  | 67246833. 76 |
| M84T70    | 84. 04411239 | 70. 3428  | 73958544. 79 |
| M84T567   | 84. 04386357 | 567. 1    | 33474649. 68 |
| M84T90    | 84. 04375289 | 89. 6999  | 215852953. 3 |
| M84T338   | 84. 04381663 | 337. 767  | 40262403. 64 |



|           |              |          |              |
|-----------|--------------|----------|--------------|
| M84T197   | 84. 04413696 | 196. 644 | 212950808. 6 |
| M84T504   | 84. 04386072 | 504. 466 | 36365167. 41 |
| M84T62    | 84. 04413271 | 62. 1777 | 99233680. 63 |
| M84T371_1 | 84. 04381368 | 370. 777 | 42769175. 33 |
| M84T592   | 84. 04385754 | 592. 067 | 40508155. 87 |
| M84T528   | 84. 04386086 | 528. 185 | 9719253. 556 |
| M84T632   | 84. 04382413 | 631. 982 | 39174135. 95 |
| M84T466   | 84. 04387188 | 466. 162 | 33894438. 93 |
| M84T611   | 84. 04384242 | 611. 145 | 42848745. 77 |
| M84T36    | 84. 06346797 | 35. 8675 | 6446688. 938 |
| M84T164   | 84. 08033449 | 163. 846 | 190885761. 1 |
| M84T579   | 84. 08032025 | 578. 816 | 95934919. 23 |
| M84T829   | 84. 08033462 | 828. 73  | 253967089. 7 |
| M84T522   | 84. 08034555 | 522. 177 | 73630945. 82 |
| M84T705_2 | 84. 08033569 | 704. 715 | 97057139. 52 |
| M84T663   | 84. 08033238 | 663. 287 | 69479733. 7  |
| M84T348   | 84. 08057897 | 348. 488 | 125090633. 3 |
| M84T644   | 84. 08033926 | 643. 727 | 60831424. 57 |
| M84T78_2  | 84. 08050261 | 78. 3841 | 145587291. 5 |
| M84T436   | 84. 08056248 | 436. 069 | 160206416. 3 |
| M84T293   | 84. 08033648 | 292. 623 | 279963436. 9 |
| M84T493   | 84. 08032713 | 492. 895 | 93599512. 77 |
| M84T225   | 84. 08032612 | 224. 729 | 452553031. 6 |
| M84T626   | 84. 08032888 | 626. 042 | 200032356. 9 |
| M84T566   | 84. 08035154 | 565. 79  | 78377003. 78 |
| M84T271   | 84. 08031856 | 270. 983 | 169138686. 3 |
| M84T420   | 84. 08032896 | 420. 274 | 148354380. 7 |
| M84T313   | 84. 08057885 | 312. 85  | 143086655. 7 |
| M84T199   | 84. 08007022 | 199. 43  | 548014657. 3 |
| M84T320   | 84. 08030884 | 319. 758 | 115781351. 6 |
| M84T770   | 84. 08032303 | 769. 702 | 114307072. 1 |
| M84T503   | 84. 08033878 | 503. 046 | 60421291. 75 |
| M84T334   | 84. 08033169 | 333. 715 | 154961044. 3 |
| M84T250   | 84. 08032716 | 250. 144 | 192189444. 5 |
| M84T143   | 84. 08015632 | 142. 85  | 315318585. 5 |
| M84T302   | 84. 080321   | 302. 191 | 160562264. 5 |
| M84T683   | 84. 08032981 | 683. 436 | 83907581. 46 |
| M84T673   | 84. 08032721 | 672. 956 | 79733836. 63 |
| M84T110_2 | 84. 08014567 | 110. 047 | 271682372. 9 |
| M84T530   | 84. 08033542 | 529. 713 | 51678435. 28 |
| M84T465   | 84. 08033779 | 464. 668 | 143006766. 5 |
| M84T239   | 84. 08033552 | 238. 605 | 243816091. 1 |
| M84T719   | 84. 08033227 | 719. 215 | 94360579. 29 |
| M84T758   | 84. 08032342 | 758. 236 | 104994633. 2 |
| M84T394   | 84. 08057014 | 393. 934 | 107058732. 7 |
| M84T512   | 84. 0803126  | 511. 77  | 94733269. 17 |
| M84T747   | 84. 08032086 | 746. 977 | 103905816. 9 |
| M84T32    | 84. 08007659 | 32. 4171 | 100117685    |
| M84T591   | 84. 08032527 | 590. 607 | 134491095. 8 |
| M84T371_2 | 84. 08032329 | 370. 777 | 118179856. 4 |
| M84T382   | 84. 08032193 | 382. 125 | 115897929. 1 |
| M84T545   | 84. 08034142 | 545. 203 | 167692249. 9 |
| M84T799   | 84. 08032974 | 799. 089 | 101987229. 3 |
| M84T652   | 84. 08032813 | 651. 956 | 89599192. 21 |

|           |              |          |              |
|-----------|--------------|----------|--------------|
| M84T173   | 84. 08006118 | 173. 407 | 223273391. 8 |
| M84T403   | 84. 08031968 | 403. 447 | 99350542. 93 |
| M84T361   | 84. 0805708  | 360. 794 | 120659748. 4 |
| M84T734   | 84. 08032958 | 734. 269 | 116299048. 3 |
| M84T155   | 84. 08032685 | 155. 197 | 209212000. 1 |
| M84T694   | 84. 08033268 | 693. 81  | 87593569. 74 |
| M85T84    | 84. 91074277 | 83. 5661 | 18919006. 24 |
| M85T128   | 84. 95900887 | 127. 944 | 10797621. 99 |
| M85T139   | 84. 95900112 | 138. 766 | 4823655. 953 |
| M85T75    | 84. 95891368 | 74. 9588 | 199236701. 1 |
| M85T48    | 84. 95894279 | 47. 6391 | 84661605. 82 |
| M85T148   | 84. 95933295 | 148. 117 | 15462546. 4  |
| M85T791   | 85. 02801923 | 790. 802 | 6232202. 598 |
| M85T263   | 85. 02809792 | 262. 529 | 302667787    |
| M85T223   | 85. 02775802 | 223. 474 | 238958580. 3 |
| M85T158   | 85. 02794063 | 157. 773 | 474694737. 7 |
| M85T190   | 85. 02766511 | 189. 571 | 523849313    |
| M85T232   | 85. 02769449 | 231. 773 | 159086355. 3 |
| M85T293   | 85. 02806128 | 292. 623 | 1074454504   |
| M85T180   | 85. 02795612 | 179. 75  | 443853034. 3 |
| M85T524   | 85. 02786911 | 523. 735 | 17185028. 25 |
| M85T239   | 85. 02768767 | 238. 605 | 220783118. 7 |
| M85T537   | 85. 02802982 | 536. 761 | 13596559. 65 |
| M85T649   | 85. 02780717 | 649. 338 | 239378677. 7 |
| M85T660   | 85. 0278595  | 660. 455 | 57288641. 23 |
| M85T516   | 85. 0278293  | 516. 214 | 13810061. 19 |
| M85T199   | 85. 02769425 | 199. 43  | 335602654    |
| M85T503   | 85. 02786248 | 503. 046 | 18204808. 3  |
| M85T389   | 85. 02800412 | 389. 035 | 49039430. 43 |
| M85T670   | 85. 02793276 | 670. 166 | 25512499. 4  |
| M85T143_1 | 85. 0279395  | 142. 85  | 699446580. 9 |
| M85T620   | 85. 02781326 | 620. 172 | 49503925. 86 |
| M85T739   | 85. 0280364  | 738. 697 | 16212804. 08 |
| M85T683   | 85. 0280375  | 683. 436 | 28148473. 87 |
| M85T838   | 85. 02802803 | 837. 524 | 2178527. 868 |
| M85T210   | 85. 02768394 | 210. 186 | 315601597. 3 |
| M85T94    | 85. 02822153 | 93. 7378 | 2292181736   |
| M85T719   | 85. 02794434 | 719. 215 | 23665426. 52 |
| M85T559   | 85. 02783997 | 559. 459 | 49230527. 81 |
| M85T607   | 85. 02805564 | 606. 774 | 15647066. 94 |
| M85T703   | 85. 0277757  | 703. 35  | 47360459. 34 |
| M85T545   | 85. 02791519 | 545. 203 | 27367158. 96 |
| M85T592   | 85. 02793458 | 592. 067 | 18670206. 44 |
| M85T632   | 85. 0277817  | 631. 982 | 47065620. 34 |
| M85T443   | 85. 02804445 | 443. 256 | 85379517. 45 |
| M85T361   | 85. 02788595 | 360. 794 | 212130538. 9 |
| M85T800   | 85. 0280229  | 800. 484 | 6907298. 045 |
| M85T576   | 85. 02798014 | 575. 878 | 11136884. 93 |
| M85T772   | 85. 02805151 | 772. 206 | 7075169. 346 |
| M85T823   | 85. 02802664 | 822. 881 | 10027800. 01 |
| M85T104   | 85. 02821567 | 104. 493 | 3120521921   |
| M85T761   | 85. 02803256 | 760. 916 | 5390012. 671 |
| M85T783   | 85. 02804436 | 782. 558 | 3303511. 165 |
| M85T140   | 85. 03935937 | 140. 286 | 6424067. 151 |

|           |              |          |              |
|-----------|--------------|----------|--------------|
| M85T126   | 85. 03933299 | 125. 598 | 9481006. 695 |
| M85T176   | 85. 04748807 | 175. 952 | 48012773. 87 |
| M85T320   | 85. 0641931  | 319. 758 | 15923173. 07 |
| M85T143_2 | 85. 08381453 | 142. 85  | 18861452. 41 |
| M85T110   | 85. 08386299 | 110. 047 | 14367101. 21 |
| M86T158   | 86. 03148103 | 157. 773 | 19708421. 87 |
| M86T293   | 86. 03156629 | 292. 623 | 41772184. 52 |
| M86T649   | 86. 03137226 | 649. 338 | 9009462. 295 |
| M86T143   | 86. 03146802 | 142. 85  | 29550408. 98 |
| M86T94    | 86. 03149586 | 93. 7378 | 96342372. 16 |
| M86T104   | 86. 03149594 | 104. 493 | 119287513. 9 |
| M86T294   | 86. 05936307 | 293. 896 | 68598231. 56 |
| M86T180   | 86. 05968635 | 179. 75  | 58837776. 7  |
| M86T393   | 86. 05942486 | 392. 715 | 121542924. 8 |
| M86T91    | 86. 05970072 | 90. 7088 | 630219060. 8 |
| M86T237_1 | 86. 05957719 | 237. 171 | 637103333. 9 |
| M86T248   | 86. 06999697 | 247. 692 | 1468583. 106 |
| M86T237_2 | 86. 08563102 | 237. 171 | 860896. 2837 |
| M86T223   | 86. 0962219  | 223. 474 | 867732309. 2 |
| M86T114   | 86. 09608639 | 114. 15  | 70601323. 89 |
| M86T246   | 86. 09605912 | 246. 372 | 1034824377   |
| M86T75    | 86. 09570251 | 74. 9588 | 54376116. 81 |
| M87T82    | 86. 90823296 | 82. 0569 | 8343895. 902 |
| M87T61    | 86. 99257147 | 61. 1538 | 2865592. 087 |
| M87T55    | 86. 99257311 | 54. 867  | 1023549. 696 |
| M87T74    | 86. 99249426 | 73. 8324 | 650584559. 1 |
| M87T164   | 87. 00747715 | 163. 846 | 17359723. 5  |
| M87T95    | 87. 03231151 | 94. 7467 | 7153790. 225 |
| M87T187   | 87. 04348102 | 186. 709 | 55028416. 72 |
| M87T103   | 87. 04354401 | 103. 423 | 110775200. 6 |
| M87T393_1 | 87. 04312422 | 392. 715 | 17643818. 78 |
| M87T248   | 87. 04406666 | 247. 692 | 95028281. 66 |
| M87T165   | 87. 04400465 | 165. 217 | 26977519. 65 |
| M87T91_1  | 87. 04376219 | 90. 7088 | 713243527. 8 |
| M87T367   | 87. 06676604 | 366. 514 | 2659945. 865 |
| M87T393_2 | 87. 06300418 | 392. 715 | 3756148. 358 |
| M87T91_2  | 87. 06305626 | 90. 7088 | 24590564. 89 |
| M87T237   | 87. 06318887 | 237. 171 | 24594756. 99 |
| M87T263   | 87. 08036856 | 262. 529 | 13575175. 06 |
| M87T86    | 87. 07811769 | 85. 6453 | 9341221. 81  |
| M87T295   | 87. 08036897 | 295. 356 | 8289017. 289 |
| M87T223   | 87. 09945621 | 223. 474 | 46523223. 77 |
| M87T246   | 87. 09950646 | 246. 372 | 56892476. 18 |
| M88T35    | 87. 50907484 | 34. 5397 | 691630. 7043 |
| M88T783   | 87. 50935337 | 782. 558 | 5722864. 666 |
| M88T75    | 87. 99311859 | 74. 9588 | 76274880. 98 |
| M88T48    | 88. 02214715 | 47. 6391 | 6977915. 761 |
| M88T67    | 88. 02227287 | 66. 9841 | 3474275. 454 |
| M88T87    | 88. 03935274 | 86. 6643 | 172797880. 6 |
| M88T66    | 88. 03911585 | 65. 7101 | 11897032. 01 |
| M88T237   | 88. 06392304 | 237. 171 | 643697. 773  |
| M88T158   | 88. 07524982 | 157. 773 | 127150372. 3 |
| M88T163   | 88. 07523423 | 162. 728 | 111408137. 1 |
| M88T456   | 88. 07570459 | 456. 126 | 179363637. 5 |

|           |             |         |             |
|-----------|-------------|---------|-------------|
| M88T61    | 88.07528721 | 61.1538 | 613546756.2 |
| M88T725   | 88.07567823 | 725.212 | 86508146.97 |
| M88T102   | 88.07526337 | 102.247 | 93256856.42 |
| M88T229   | 88.07524587 | 229.059 | 106318360.5 |
| M88T540   | 88.07563541 | 539.764 | 191908807.9 |
| M88T401   | 88.07532989 | 400.59  | 133174949.4 |
| M88T411   | 88.07534621 | 410.542 | 226695495.8 |
| M88T788   | 88.07569494 | 787.856 | 137900039.1 |
| M88T558   | 88.07570952 | 557.967 | 142010116.8 |
| M88T241   | 88.07526964 | 241.368 | 159211828.1 |
| M88T748   | 88.07566593 | 748.486 | 95417578.03 |
| M88T394   | 88.07526575 | 393.934 | 163791118.2 |
| M88T367   | 88.07523215 | 366.514 | 230858468.6 |
| M88T481   | 88.07538325 | 481.042 | 212796695.2 |
| M88T807   | 88.07568536 | 807.232 | 160665245.6 |
| M88T531   | 88.07562387 | 531.127 | 256007685.3 |
| M88T345   | 88.07524939 | 344.555 | 407396217.2 |
| M88T503   | 88.07567879 | 503.046 | 488689287.8 |
| M88T267   | 88.07526469 | 267.171 | 104591952.7 |
| M88T221_1 | 88.07523295 | 220.676 | 147447563.7 |
| M88T95    | 88.07524149 | 94.7467 | 84988182.93 |
| M88T577   | 88.07527668 | 577.366 | 576666920.6 |
| M88T121   | 88.07525483 | 120.525 | 166652210.3 |
| M88T838   | 88.07568243 | 837.524 | 43501178.65 |
| M88T210   | 88.07525034 | 210.186 | 147787763.4 |
| M88T736   | 88.0756838  | 735.7   | 73662160.23 |
| M88T177   | 88.07522276 | 177.295 | 115345056.8 |
| M88T111   | 88.0752489  | 111.382 | 151975743.5 |
| M88T625   | 88.07526357 | 624.608 | 1064061821  |
| M88T132   | 88.07527619 | 131.949 | 132743578.7 |
| M88T760   | 88.07566395 | 759.605 | 61916407.51 |
| M88T320   | 88.0752602  | 319.758 | 318933783.6 |
| M88T433   | 88.07568734 | 433.111 | 159119261   |
| M88T194   | 88.07526183 | 193.823 | 199346465.7 |
| M88T466   | 88.0756844  | 466.162 | 186130550.7 |
| M88T679   | 88.07565682 | 678.909 | 987659232.9 |
| M88T299   | 88.07524733 | 299.493 | 146946862.2 |
| M88T423   | 88.07536305 | 423.199 | 190618783.4 |
| M88T276   | 88.07526876 | 276.414 | 167259463.1 |
| M88T448   | 88.0757015  | 447.531 | 151951321.6 |
| M88T772   | 88.0756892  | 772.206 | 47514612.26 |
| M88T379   | 88.07525513 | 379.194 | 194182882.4 |
| M88T254   | 88.07527418 | 254.446 | 210361054.8 |
| M88T148   | 88.07523838 | 148.117 | 137745529.2 |
| M88T826   | 88.07569734 | 825.74  | 59652949.87 |
| M88T329   | 88.11187185 | 329.481 | 65457189.89 |
| M88T221_2 | 88.11176382 | 220.676 | 4779895.713 |
| M89T33_1  | 88.50914812 | 33.467  | 14668234.44 |
| M89T75_1  | 88.99030115 | 74.9588 | 91040382.22 |
| M89T767   | 89.00744032 | 766.742 | 11377936.15 |
| M89T748   | 89.0083501  | 748.486 | 14179021.12 |
| M89T33_2  | 89.00824473 | 33.467  | 34407744.88 |
| M89T789   | 89.00740691 | 789.293 | 63905578.47 |
| M89T760   | 89.00821494 | 759.605 | 14387147.83 |

|           |             |         |             |
|-----------|-------------|---------|-------------|
| M89T728   | 89.00857408 | 728.25  | 16241565.23 |
| M89T741   | 89.00822206 | 741.302 | 12925254.89 |
| M89T121   | 89.02255753 | 120.525 | 13168560.46 |
| M89T101   | 89.05935818 | 101.161 | 68539565.06 |
| M89T230   | 89.05973273 | 230.321 | 67962806.59 |
| M89T147   | 89.05974688 | 146.742 | 101902695.4 |
| M89T263   | 89.0597317  | 262.529 | 219256798.5 |
| M89T57    | 89.05971775 | 57.4179 | 288875151.5 |
| M89T207   | 89.05974461 | 207.393 | 72142702.96 |
| M89T167   | 89.05936014 | 166.613 | 181846269.2 |
| M89T291   | 89.05971704 | 291.307 | 64447782.18 |
| M89T198   | 89.05972766 | 198.072 | 79618229.64 |
| M89T118   | 89.05973104 | 118.116 | 86547305.93 |
| M89T503   | 89.07176102 | 503.046 | 646420.067  |
| M89T676   | 89.07166988 | 675.866 | 665058.796  |
| M89T63_1  | 89.07886533 | 63.4448 | 18432724.25 |
| M89T33_3  | 89.10709305 | 33.467  | 9990898.714 |
| M89T63_2  | 89.10736672 | 63.4448 | 12282527.81 |
| M89T75_2  | 89.10713829 | 74.9588 | 37591621.42 |
| M89T49    | 89.10713971 | 48.7362 | 5273531.117 |
| M90T725   | 89.50592655 | 725.212 | 336165768.1 |
| M90T644   | 89.50673167 | 643.727 | 48373335.94 |
| M90T746   | 89.50492968 | 745.603 | 385265414.5 |
| M90T794   | 89.50682382 | 793.649 | 85999763.22 |
| M90T33_1  | 89.50542239 | 33.467  | 268026775.7 |
| M90T665_1 | 89.50672141 | 664.745 | 88907317.65 |
| M90T626   | 89.50498237 | 626.042 | 74189723.72 |
| M90T688   | 89.50673718 | 687.95  | 122498072   |
| M90T636   | 89.50501566 | 636.473 | 53113591.09 |
| M90T698   | 89.5059199  | 697.952 | 130236907.7 |
| M90T816   | 89.50511618 | 815.517 | 79279989.81 |
| M90T758_1 | 89.50521496 | 758.236 | 354147741.4 |
| M90T832   | 89.50540791 | 831.709 | 69224567.89 |
| M90T70    | 89.50679979 | 70.3428 | 32427995.78 |
| M90T784   | 89.50674083 | 783.78  | 147172703.7 |
| M90T655   | 89.50676244 | 654.542 | 49812549.06 |
| M90T133   | 89.50698617 | 133.259 | 49581211.23 |
| M90T713   | 89.50672887 | 713.464 | 247626996.8 |
| M90T803   | 89.50513668 | 802.88  | 92026734.4  |
| M90T677   | 89.50673464 | 677.376 | 109257180   |
| M90T75    | 89.54485336 | 74.9588 | 49517274.73 |
| M90T33_2  | 90.00759813 | 33.467  | 18121516.75 |
| M90T57    | 90.00803939 | 57.4179 | 1582398.762 |
| M90T68_1  | 90.0076038  | 68.0903 | 873551.4511 |
| M90T48    | 90.00767437 | 47.6391 | 5366109.81  |
| M90T226   | 90.05499991 | 226.202 | 46995809.96 |
| M90T791   | 90.05504245 | 790.802 | 44495990.36 |
| M90T557   | 90.0549639  | 556.816 | 25625619.81 |
| M90T101   | 90.05450016 | 101.161 | 69449708.45 |
| M90T147   | 90.05499052 | 146.742 | 25224021.44 |
| M90T750   | 90.0549949  | 749.96  | 27356234.59 |
| M90T665_2 | 90.05508261 | 664.745 | 65515094.98 |
| M90T158   | 90.05496606 | 157.773 | 38260554.52 |
| M90T496   | 90.05511609 | 495.779 | 22810497.69 |

|           |              |          |              |
|-----------|--------------|----------|--------------|
| M90T137   | 90. 05502713 | 137. 373 | 34739296. 19 |
| M90T325   | 90. 05506576 | 325. 35  | 26834089. 18 |
| M90T388   | 90. 05516448 | 387. 763 | 20894336. 07 |
| M90T474   | 90. 05513153 | 473. 597 | 29000046. 75 |
| M90T129   | 90. 05500718 | 129. 234 | 37806941. 76 |
| M90T395   | 90. 05503775 | 395. 264 | 17926043. 14 |
| M90T758_2 | 90. 05497196 | 758. 236 | 24138479. 56 |
| M90T765   | 90. 05500947 | 765. 406 | 28238006. 41 |
| M90T408   | 90. 05515954 | 407. 724 | 31697710. 68 |
| M90T343   | 90. 05509595 | 343. 226 | 49224755. 25 |
| M90T267   | 90. 05502612 | 267. 171 | 34477795. 38 |
| M90T531   | 90. 0550793  | 531. 127 | 26808906. 55 |
| M90T506   | 90. 05509093 | 505. 855 | 27745136. 45 |
| M90T88_1  | 90. 05468441 | 87. 6739 | 2075728665   |
| M90T121   | 90. 05500308 | 120. 525 | 42503731. 41 |
| M90T594   | 90. 05503116 | 593. 62  | 46864447. 92 |
| M90T110   | 90. 05501961 | 110. 047 | 45548439     |
| M90T838   | 90. 05494464 | 837. 524 | 13444085. 18 |
| M90T172   | 90. 05497694 | 171. 935 | 34730598. 15 |
| M90T239   | 90. 05509724 | 238. 605 | 34128199. 88 |
| M90T547   | 90. 05496342 | 546. 651 | 35786786. 45 |
| M90T515   | 90. 05513355 | 514. 727 | 29076646. 67 |
| M90T449   | 90. 05502909 | 448. 978 | 58100670. 71 |
| M90T703   | 90. 05493213 | 703. 35  | 39667178. 7  |
| M90T568   | 90. 05508947 | 568. 464 | 36954874. 73 |
| M90T201   | 90. 05504915 | 200. 766 | 72117844. 38 |
| M90T487   | 90. 05515026 | 486. 885 | 24864307. 14 |
| M90T257   | 90. 05498865 | 257. 155 | 27427454. 63 |
| M90T690   | 90. 05501138 | 689. 5   | 37973540. 02 |
| M90T610   | 90. 05511424 | 609. 592 | 41731742. 18 |
| M90T299   | 90. 0550714  | 299. 493 | 61849945. 39 |
| M90T773   | 90. 05502176 | 773. 437 | 23640172. 2  |
| M90T280   | 90. 0550588  | 280. 345 | 36851931. 74 |
| M90T802   | 90. 05503289 | 801. 685 | 20942922. 98 |
| M90T426   | 90. 05509887 | 425. 909 | 38389050. 68 |
| M90T823   | 90. 05502198 | 822. 881 | 52763602. 51 |
| M90T635   | 90. 05500841 | 635. 022 | 80035472. 06 |
| M90T730   | 90. 05441564 | 729. 798 | 75337311. 1  |
| M90T368   | 90. 05510522 | 367. 949 | 45162293. 75 |
| M90T68_2  | 90. 06270519 | 68. 0903 | 2551074. 73  |
| M90T88_2  | 90. 09102511 | 87. 6739 | 25173135. 49 |
| M91T747_1 | 90. 50473048 | 746. 977 | 33105842. 51 |
| M91T765   | 90. 50527044 | 765. 406 | 97151210. 1  |
| M91T794_1 | 90. 50586489 | 793. 649 | 111815323. 2 |
| M91T33    | 90. 50603605 | 33. 467  | 43005311. 74 |
| M91T811   | 90. 50590163 | 811. 413 | 328196556. 5 |
| M91T772   | 90. 50591542 | 772. 206 | 77721514. 92 |
| M91T731   | 90. 50539811 | 731. 347 | 248525100. 2 |
| M91T69_1  | 90. 50670651 | 69. 2834 | 2274248. 335 |
| M91T757   | 90. 50677978 | 757. 001 | 95594274. 83 |
| M91T783   | 90. 5059986  | 782. 558 | 131559186. 6 |
| M91T456   | 90. 52586738 | 456. 126 | 270490134. 6 |
| M91T60    | 90. 52564488 | 59. 9075 | 636126320. 7 |
| M91T540   | 90. 52586861 | 539. 764 | 137095950. 6 |

|           |              |          |              |
|-----------|--------------|----------|--------------|
| M91T416   | 90. 5265576  | 416. 239 | 142416583. 4 |
| M91T36    | 90. 52575932 | 35. 8675 | 314452236. 8 |
| M91T353   | 90. 52586929 | 352. 65  | 174366698. 5 |
| M91T230   | 90. 52587365 | 230. 321 | 248364909. 3 |
| M91T129   | 90. 52587422 | 129. 234 | 140518684. 2 |
| M91T794_2 | 90. 52627819 | 793. 649 | 35605068. 25 |
| M91T432   | 90. 52586761 | 431. 64  | 188078829. 4 |
| M91T102   | 90. 52574975 | 102. 247 | 15265111. 64 |
| M91T644   | 90. 52586793 | 643. 727 | 236062172    |
| M91T158   | 90. 52585716 | 157. 773 | 102194120. 8 |
| M91T388   | 90. 52585708 | 387. 763 | 151391223. 8 |
| M91T626   | 90. 52582889 | 626. 042 | 238915158. 1 |
| M91T136   | 90. 5258778  | 135. 971 | 238227605. 1 |
| M91T399   | 90. 52585688 | 399. 046 | 265322849. 1 |
| M91T806   | 90. 52621013 | 805. 823 | 26568410. 49 |
| M91T481   | 90. 52587321 | 481. 042 | 155608427    |
| M91T381   | 90. 52585003 | 380. 63  | 225763669    |
| M91T533   | 90. 52583391 | 532. 526 | 189739430. 5 |
| M91T724   | 90. 52588408 | 723. 682 | 443283631. 9 |
| M91T833   | 90. 52602697 | 833. 029 | 6614997. 717 |
| M91T244   | 90. 52642784 | 244. 085 | 440766108. 6 |
| M91T423   | 90. 52657476 | 423. 199 | 135481603. 9 |
| M91T577   | 90. 52587122 | 577. 366 | 128621782. 6 |
| M91T673   | 90. 52650956 | 672. 956 | 739215512. 8 |
| M91T75_1  | 90. 52605246 | 74. 9588 | 1124099358   |
| M91T87    | 90. 52576552 | 86. 6643 | 34995553. 53 |
| M91T747_2 | 90. 52585304 | 746. 977 | 122888106. 9 |
| M91T568   | 90. 5258798  | 568. 464 | 136205432. 6 |
| M91T471   | 90. 52662731 | 470. 602 | 210960215. 2 |
| M91T507   | 90. 52550613 | 507. 343 | 344708864. 2 |
| M91T820   | 90. 5256089  | 819. 78  | 17643623. 37 |
| M91T551   | 90. 52585948 | 550. 919 | 133057390. 1 |
| M91T610   | 90. 52588438 | 609. 592 | 260757160. 7 |
| M91T784   | 90. 52587603 | 783. 78  | 65801668. 51 |
| M91T521   | 90. 52654755 | 520. 739 | 143455168. 6 |
| M91T195   | 90. 52597409 | 195. 23  | 770461529. 9 |
| M91T113   | 90. 52587734 | 112. 781 | 123680976. 4 |
| M91T364   | 90. 52583695 | 363. 58  | 355459966. 8 |
| M91T773   | 90. 5258627  | 773. 437 | 74424182. 47 |
| M91T442   | 90. 52658968 | 442. 005 | 151853349. 5 |
| M91T589   | 90. 52588139 | 589. 053 | 280143888. 4 |
| M91T280   | 90. 52584417 | 280. 345 | 688139891. 7 |
| M91T148   | 90. 52587152 | 148. 117 | 197090724    |
| M91T317   | 90. 52653762 | 317. 199 | 1115638174   |
| M91T45_1  | 90. 52567222 | 45. 3435 | 536301162. 8 |
| M91T137   | 90. 94754025 | 137. 373 | 5085620. 915 |
| M91T150   | 90. 94733372 | 149. 65  | 5436714. 133 |
| M91T69_2  | 90. 94771889 | 69. 2834 | 9538329. 393 |
| M91T82    | 90. 97665813 | 82. 0569 | 9890062. 529 |
| M91T178   | 91. 01748431 | 178. 408 | 9967373. 372 |
| M91T59    | 91. 02788359 | 58. 6151 | 22438116. 68 |
| M91T45_2  | 91. 02718354 | 45. 3435 | 30834219. 33 |
| M91T51    | 91. 02717219 | 51. 1942 | 16101318. 14 |
| M91T65    | 91. 02723192 | 64. 6213 | 21459649. 29 |

|          |              |          |              |
|----------|--------------|----------|--------------|
| M91T75_2 | 91. 02719033 | 74. 9588 | 66622918. 84 |
| M91T35   | 91. 02746209 | 34. 5397 | 14171488. 39 |
| M91T291  | 91. 03856958 | 291. 307 | 3950307. 678 |
| M91T94   | 91. 03858006 | 93. 7378 | 15234428. 84 |
| M91T453  | 91. 054328   | 453. 317 | 14127775. 06 |
| M91T669  | 91. 05418928 | 668. 867 | 8226167. 981 |
| M91T649  | 91. 05369551 | 649. 338 | 16362060. 79 |
| M91T682  | 91. 05411209 | 681. 885 | 9085037. 892 |
| M91T345  | 91. 05385359 | 344. 555 | 11043955. 16 |
| M91T88   | 91. 05825389 | 87. 6739 | 66822298. 22 |
| M91T562  | 91. 05418514 | 561. 955 | 42691295. 9  |
| M91T718  | 91. 05408841 | 717. 959 | 8402576. 29  |
| M91T777  | 91. 05354005 | 777. 245 | 11278913. 18 |
| M91T703  | 91. 0536088  | 703. 35  | 17668035. 72 |
| M91T218  | 91. 0543447  | 217. 866 | 22288737. 6  |
| M91T543  | 91. 05418175 | 542. 766 | 21061643. 53 |
| M91T402  | 91. 05398267 | 401. 963 | 7275174. 928 |
| M91T694  | 91. 0541352  | 693. 81  | 7494677. 932 |
| M91T792  | 91. 05397722 | 792. 146 | 8483966. 956 |
| M92T829  | 91. 50286313 | 828. 73  | 34651032. 12 |
| M92T725  | 91. 50457444 | 725. 212 | 80767424. 96 |
| M92T809  | 91. 50287577 | 808. 678 | 36902312. 61 |
| M92T33_1 | 91. 50340213 | 33. 467  | 16962552. 86 |
| M92T764  | 91. 5028266  | 763. 856 | 32400227. 09 |
| M92T754  | 91. 50287387 | 753. 987 | 47751081. 67 |
| M92T818  | 91. 50459747 | 818. 418 | 29936114. 72 |
| M92T792  | 91. 5036304  | 792. 146 | 93439117. 27 |
| M92T75   | 91. 54225535 | 74. 9588 | 187079893. 3 |
| M92T33_2 | 92. 00472454 | 33. 467  | 756767. 0066 |
| M92T237  | 92. 02531669 | 237. 171 | 716399. 7417 |
| M93T758  | 92. 5026356  | 758. 236 | 5792331. 709 |
| M93T75   | 92. 52218467 | 74. 9588 | 16019193. 28 |
| M93T48   | 92. 52259152 | 47. 6391 | 24842988. 6  |
| M93T98   | 93. 05451417 | 97. 7824 | 20628822. 26 |
| M93T833  | 93. 05668327 | 833. 029 | 1874684. 938 |
| M93T649  | 93. 06973081 | 649. 338 | 7281040. 387 |
| M93T451  | 93. 06999843 | 450. 503 | 7141771. 512 |
| M93T472  | 93. 07003636 | 472. 132 | 8232199. 23  |
| M93T682  | 93. 06990779 | 681. 885 | 5217615. 403 |
| M93T535  | 93. 06971144 | 535. 329 | 9352494. 886 |
| M93T345  | 93. 06958505 | 344. 555 | 6719802. 75  |
| M93T670  | 93. 06973029 | 670. 166 | 5575139. 5   |
| M93T562  | 93. 06972072 | 561. 955 | 17069664. 86 |
| M93T547  | 93. 06966777 | 546. 651 | 8301954. 28  |
| M93T719  | 93. 06979267 | 719. 215 | 3991862. 769 |
| M93T703  | 93. 06971849 | 703. 35  | 9005131. 104 |
| M93T148  | 93. 06954125 | 148. 117 | 6716579. 298 |
| M94T446  | 94. 02836297 | 445. 984 | 1074037. 515 |
| M94T398  | 94. 04457221 | 397. 878 | 141993722. 5 |
| M94T75_1 | 94. 04477383 | 74. 9588 | 5988290500   |
| M94T35   | 94. 04480866 | 34. 5397 | 222450411. 1 |
| M94T809  | 94. 04592394 | 808. 678 | 165526450. 2 |
| M94T804  | 94. 0454018  | 804. 327 | 177114555. 5 |
| M94T600  | 94. 04532638 | 599. 621 | 326626795. 3 |



|           |              |          |              |
|-----------|--------------|----------|--------------|
| M94T61    | 94. 04549515 | 61. 1538 | 58880877. 24 |
| M94T663   | 94. 04538258 | 663. 287 | 341842950. 5 |
| M94T794   | 94. 04533034 | 793. 649 | 286808555. 2 |
| M94T688   | 94. 04539649 | 687. 95  | 437431395    |
| M94T388   | 94. 04543901 | 387. 763 | 148181191. 8 |
| M94T531   | 94. 04551109 | 531. 127 | 1432672102   |
| M94T698   | 94. 04532233 | 697. 952 | 388422156    |
| M94T572   | 94. 04539833 | 571. 523 | 453016914. 4 |
| M94T832   | 94. 04593271 | 831. 709 | 87778543. 91 |
| M94T674   | 94. 04531877 | 674. 402 | 488041029. 8 |
| M94T820   | 94. 04586034 | 819. 78  | 139442825. 7 |
| M94T611   | 94. 04536537 | 611. 145 | 513896421. 1 |
| M94T757   | 94. 04533014 | 757. 001 | 1289238144   |
| M94T734   | 94. 04551362 | 734. 269 | 573722637    |
| M94T713   | 94. 04542782 | 713. 464 | 614515047. 2 |
| M94T588   | 94. 04536315 | 587. 521 | 302393685. 6 |
| M94T480   | 94. 04594338 | 479. 527 | 743970337. 8 |
| M94T635   | 94. 04535744 | 635. 022 | 848938901. 3 |
| M94T783   | 94. 04542007 | 782. 558 | 349041945. 5 |
| M94T96    | 94. 06474746 | 95. 7572 | 11545013. 3  |
| M94T331   | 94. 06524279 | 330. 809 | 13005509. 98 |
| M94T75_2  | 94. 07459015 | 74. 9588 | 8534937. 656 |
| M95T241   | 94. 53322496 | 241. 368 | 9068230. 282 |
| M95T603   | 94. 54702755 | 602. 513 | 90676036. 68 |
| M95T663_1 | 94. 54700677 | 663. 287 | 26260187. 62 |
| M95T638   | 94. 54365456 | 637. 996 | 54021448. 53 |
| M95T688   | 94. 54342796 | 687. 95  | 89518191. 04 |
| M95T554   | 94. 54505944 | 553. 936 | 48322979. 9  |
| M95T824   | 94. 54687284 | 824. 311 | 16247682. 62 |
| M95T577   | 94. 5470844  | 577. 366 | 22725943. 46 |
| M95T838   | 94. 5468903  | 837. 524 | 3145465. 652 |
| M95T75_1  | 94. 54603129 | 74. 9588 | 1043380877   |
| M95T718   | 94. 54357763 | 717. 959 | 27625841. 76 |
| M95T747   | 94. 54704265 | 746. 977 | 45170816. 33 |
| M95T568   | 94. 5468226  | 568. 464 | 25057905. 88 |
| M95T756   | 94. 54706412 | 755. 537 | 58570489. 32 |
| M95T784   | 94. 54699705 | 783. 78  | 69182253. 47 |
| M95T655_1 | 94. 54694245 | 654. 542 | 21314128. 54 |
| M95T773_1 | 94. 54704073 | 773. 437 | 28001157. 06 |
| M95T734   | 94. 54339149 | 734. 269 | 52936208. 68 |
| M95T35_1  | 94. 54500235 | 34. 5397 | 30451601. 53 |
| M95T205   | 95. 02363878 | 204. 747 | 1405715. 979 |
| M95T101   | 95. 04911828 | 101. 161 | 19654774. 83 |
| M95T725   | 95. 04360694 | 725. 212 | 159394324. 5 |
| M95T663_2 | 95. 04363364 | 663. 287 | 45178341. 2  |
| M95T540   | 95. 04428992 | 539. 764 | 28447887. 8  |
| M95T644   | 95. 04363283 | 643. 727 | 50172044. 78 |
| M95T293   | 95. 04920727 | 292. 623 | 11342546. 06 |
| M95T345   | 95. 04914386 | 344. 555 | 11518664     |
| M95T698   | 95. 04455421 | 697. 952 | 46565167. 77 |
| M95T709   | 95. 04458612 | 709. 106 | 46383699. 75 |
| M95T63    | 95. 04845339 | 63. 4448 | 7646490. 324 |
| M95T75_2  | 95. 04366871 | 74. 9588 | 845144885. 9 |
| M95T762   | 95. 04358567 | 762. 439 | 144175457. 9 |

|           |              |          |              |
|-----------|--------------|----------|--------------|
| M95T218   | 95. 04919067 | 217. 866 | 21561089. 16 |
| M95T690   | 95. 0435586  | 689. 5   | 73348315. 49 |
| M95T674   | 95. 04453279 | 674. 402 | 63351996. 39 |
| M95T551   | 95. 04428023 | 550. 919 | 22963143. 63 |
| M95T655_2 | 95. 04461429 | 654. 542 | 31295359. 22 |
| M95T802_1 | 95. 04357084 | 801. 685 | 143812862. 6 |
| M95T54    | 95. 04927226 | 53. 6731 | 10377356. 3  |
| M95T35_2  | 95. 04431555 | 34. 5397 | 28949370. 5  |
| M95T246   | 95. 06045551 | 246. 372 | 13884710. 31 |
| M95T209   | 95. 06024276 | 208. 905 | 4930006. 603 |
| M95T311   | 95. 08564107 | 311. 445 | 8194149. 449 |
| M95T263   | 95. 08579158 | 262. 529 | 14798192. 6  |
| M95T435   | 95. 08583575 | 434. 589 | 14781608. 18 |
| M95T119   | 95. 08566985 | 119. 433 | 13436686. 89 |
| M95T270   | 95. 08571482 | 269. 528 | 11778995. 72 |
| M95T605   | 95. 08571237 | 605. 264 | 11078233. 87 |
| M95T764   | 95. 0855442  | 763. 856 | 13283571. 46 |
| M95T669   | 95. 08571043 | 668. 867 | 27041970. 49 |
| M95T475   | 95. 08576448 | 475. 007 | 12753006. 63 |
| M95T649   | 95. 0848588  | 649. 338 | 39760261. 45 |
| M95T451   | 95. 0857946  | 450. 503 | 12618887. 6  |
| M95T513   | 95. 08563059 | 513. 285 | 9051063. 605 |
| M95T420   | 95. 08570855 | 420. 274 | 11690996. 03 |
| M95T813   | 95. 08558145 | 812. 862 | 10820296. 23 |
| M95T682   | 95. 08572181 | 681. 885 | 21268163. 53 |
| M95T390   | 95. 08554861 | 390. 432 | 15497262. 98 |
| M95T535   | 95. 08572851 | 535. 329 | 11375105. 82 |
| M95T524   | 95. 08583134 | 523. 735 | 10857278. 99 |
| M95T129   | 95. 08565749 | 129. 234 | 12646394. 33 |
| M95T461   | 95. 08580356 | 460. 537 | 10811304. 86 |
| M95T167   | 95. 08549094 | 166. 613 | 21771299. 37 |
| M95T334   | 95. 08554514 | 333. 715 | 5685909. 239 |
| M95T594   | 95. 08564324 | 593. 62  | 9177702. 486 |
| M95T503   | 95. 0857021  | 503. 046 | 8276604. 841 |
| M95T139   | 95. 08558234 | 138. 766 | 12761271. 34 |
| M95T562   | 95. 08572252 | 561. 955 | 144686362. 6 |
| M95T586   | 95. 08562372 | 585. 968 | 10755019. 31 |
| M95T834   | 95. 08550596 | 834. 486 | 5672032. 794 |
| M95T295   | 95. 08552328 | 295. 356 | 9437548. 52  |
| M95T751   | 95. 08561741 | 751. 333 | 23304087. 79 |
| M95T740   | 95. 08566315 | 740. 014 | 10374087. 93 |
| M95T703   | 95. 08577253 | 703. 35  | 41110538. 01 |
| M95T320   | 95. 08564708 | 319. 758 | 6491185. 385 |
| M95T304   | 95. 08562972 | 303. 513 | 5670620. 678 |
| M95T487   | 95. 08563921 | 486. 885 | 8240360. 575 |
| M95T359   | 95. 08552389 | 359. 32  | 5331737. 591 |
| M95T545   | 95. 08479718 | 545. 203 | 44823100. 65 |
| M95T716   | 95. 08561924 | 716. 403 | 20437908. 73 |
| M95T279   | 95. 08568689 | 279. 039 | 10671472. 7  |
| M95T632   | 95. 08567259 | 631. 982 | 16654026. 73 |
| M95T403   | 95. 08559977 | 403. 447 | 7683493. 432 |
| M95T216   | 95. 08562188 | 216. 359 | 21455054. 21 |
| M95T191   | 95. 08562399 | 190. 962 | 36709743. 63 |
| M95T237   | 95. 08565632 | 237. 171 | 30342015. 44 |

|           |             |         |             |
|-----------|-------------|---------|-------------|
| M95T773_2 | 95.0856204  | 773.437 | 10211966.38 |
| M95T821   | 95.08565645 | 821.334 | 8997355.801 |
| M95T694   | 95.08565671 | 693.81  | 21091646.33 |
| M95T576   | 95.08575267 | 575.878 | 15318002.05 |
| M95T802_2 | 95.08551798 | 801.685 | 9214072.285 |
| M95T254   | 95.0857003  | 254.446 | 11720805.15 |
| M96T75    | 95.54557307 | 74.9588 | 67672326.23 |
| M96T206   | 96.00764625 | 205.903 | 6295084.12  |
| M96T119   | 96.04477395 | 119.433 | 234171908.6 |
| M96T106   | 96.04469172 | 105.503 | 451098997.5 |
| M96T143   | 96.04466887 | 142.85  | 91212177.67 |
| M96T446   | 96.04479082 | 445.984 | 42969119.47 |
| M96T95    | 96.04413002 | 94.7467 | 26969839.56 |
| M96T177   | 96.04453928 | 177.295 | 49980444.55 |
| M96T245   | 96.04468069 | 245.199 | 27991413.91 |
| M96T331   | 96.0805238  | 330.809 | 2996768.811 |
| M96T342   | 96.08061051 | 341.802 | 2400988.305 |
| M96T66    | 96.08851331 | 65.7101 | 1247639.776 |
| M97T75    | 96.53416705 | 74.9588 | 20682128.34 |
| M97T36    | 96.96030245 | 35.8675 | 2392038.264 |
| M97T52    | 96.96031443 | 52.4521 | 2703026.818 |
| M97T45    | 96.96032818 | 45.3435 | 2765957.972 |
| M97T66    | 96.96030558 | 65.7101 | 2786592.988 |
| M97T31    | 96.97217127 | 31.4047 | 1080323.465 |
| M97T72    | 97.00822624 | 71.5935 | 13886951.4  |
| M97T164   | 97.02841939 | 163.846 | 203718365.7 |
| M97T158   | 97.02841624 | 157.773 | 346593634.3 |
| M97T119   | 97.02839816 | 119.433 | 410690710.6 |
| M97T223   | 97.02796684 | 223.474 | 149900054.2 |
| M97T190   | 97.02839435 | 189.571 | 303137193.7 |
| M97T293   | 97.02840411 | 292.623 | 531197994.3 |
| M97T180   | 97.02841504 | 179.75  | 263392968.9 |
| M97T649   | 97.02865632 | 649.338 | 122373564   |
| M97T106_1 | 97.02839398 | 105.503 | 1148093920  |
| M97T199   | 97.02839694 | 199.43  | 168676433.6 |
| M97T260_1 | 97.02840727 | 259.74  | 164245180.6 |
| M97T143   | 97.02841983 | 142.85  | 456580382.6 |
| M97T620   | 97.02872202 | 620.172 | 34996784.58 |
| M97T210   | 97.02841463 | 210.186 | 216701485.3 |
| M97T94    | 97.0283911  | 93.7378 | 1750948241  |
| M97T703   | 97.02861176 | 703.35  | 22571552.83 |
| M97T545   | 97.02844119 | 545.203 | 43023101.68 |
| M97T632   | 97.02872235 | 631.982 | 35807387.01 |
| M97T659   | 97.0286923  | 658.953 | 46111383.36 |
| M97T60    | 97.03951137 | 59.9075 | 1614276.053 |
| M97T68    | 97.03942899 | 68.0903 | 1887740.816 |
| M97T42    | 97.03951747 | 41.798  | 3383590.31  |
| M97T35    | 97.03946553 | 34.5397 | 2059555.118 |
| M97T50    | 97.03950425 | 50.041  | 5500039.62  |
| M97T106_2 | 97.0479878  | 105.503 | 21543310.77 |
| M97T121   | 97.04771197 | 120.525 | 7377462.852 |
| M97T446   | 97.04755561 | 445.984 | 1334028.804 |
| M97T750   | 97.07608601 | 749.96  | 41040281.91 |
| M97T836   | 97.07617709 | 836.034 | 13185927.62 |

|           |              |          |              |
|-----------|--------------|----------|--------------|
| M97T807   | 97. 07622085 | 807. 232 | 19948532. 16 |
| M97T824   | 97. 07621505 | 824. 311 | 20076923. 45 |
| M97T816   | 97. 07615884 | 815. 517 | 11171840. 05 |
| M97T197   | 97. 07592983 | 196. 644 | 4463993. 246 |
| M97T132   | 97. 07597216 | 131. 949 | 5311945. 612 |
| M97T792   | 97. 07616163 | 792. 146 | 16654180. 04 |
| M97T783   | 97. 07618723 | 782. 558 | 8775606. 53  |
| M97T413   | 97. 10142193 | 413. 295 | 7612405. 355 |
| M97T187   | 97. 10134877 | 186. 709 | 13456769. 62 |
| M97T453   | 97. 10145267 | 453. 317 | 5209012. 803 |
| M97T230   | 97. 10133555 | 230. 321 | 9907169. 002 |
| M97T286   | 97. 10121352 | 285. 9   | 4401730. 08  |
| M97T147   | 97. 10124009 | 146. 742 | 9219106. 537 |
| M97T137   | 97. 1013468  | 137. 373 | 10307541. 07 |
| M97T271   | 97. 10134929 | 270. 983 | 10295364. 99 |
| M97T279   | 97. 1013082  | 279. 039 | 6949965. 549 |
| M97T260_2 | 97. 10134252 | 259. 74  | 8014304. 808 |
| M97T250   | 97. 10136333 | 250. 144 | 10016870. 65 |
| M97T221   | 97. 101247   | 220. 676 | 8113396. 188 |
| M97T168   | 97. 10118588 | 167. 804 | 5939121. 47  |
| M97T201   | 97. 10132346 | 200. 766 | 5428747. 342 |
| M97T240   | 97. 10141144 | 239. 913 | 10350862. 52 |
| M97T423   | 97. 10142829 | 423. 199 | 11269969. 4  |
| M97T209   | 97. 101258   | 208. 905 | 5706313. 541 |
| M97T155   | 97. 10127665 | 155. 197 | 5690629. 642 |
| M97T216   | 97. 40258191 | 216. 359 | 1677707. 824 |
| M98T46    | 97. 51463823 | 46. 447  | 14914955. 39 |
| M98T69    | 97. 51458049 | 69. 2834 | 7877492. 266 |
| M98T32_1  | 97. 51477529 | 32. 4171 | 19805080. 1  |
| M98T68    | 97. 96848807 | 68. 0903 | 2762568. 282 |
| M98T32_2  | 97. 96850267 | 32. 4171 | 5723441. 377 |
| M98T38    | 97. 99181543 | 38. 3208 | 308763163. 4 |
| M98T411   | 97. 99191943 | 410. 542 | 79971111. 97 |
| M98T665   | 97. 99194111 | 664. 745 | 52599329. 88 |
| M98T639   | 97. 99093927 | 639. 219 | 159981381. 5 |
| M98T420   | 97. 99191747 | 420. 274 | 76216414. 82 |
| M98T398   | 97. 99097899 | 397. 878 | 105767089    |
| M98T388   | 97. 99100014 | 387. 763 | 73189889. 31 |
| M98T698   | 97. 99094061 | 697. 952 | 56109639. 62 |
| M98T572   | 97. 99097054 | 571. 523 | 113938612    |
| M98T510   | 97. 99090169 | 510. 333 | 75117500. 21 |
| M98T552   | 97. 99096182 | 552. 452 | 80045212. 39 |
| M98T709   | 97. 99096638 | 709. 106 | 45959550. 16 |
| M98T533   | 97. 99092046 | 532. 526 | 88189321. 93 |
| M98T757_1 | 97. 99191712 | 757. 001 | 25016404. 52 |
| M98T365   | 97. 99193797 | 365. 061 | 107586796. 3 |
| M98T655   | 97. 99096973 | 654. 542 | 57087274. 84 |
| M98T379   | 97. 99097027 | 379. 194 | 88583668. 44 |
| M98T677   | 97. 99185297 | 677. 376 | 90588515. 29 |
| M98T748   | 98. 01377109 | 748. 486 | 6933731. 297 |
| M98T794   | 98. 01371791 | 793. 649 | 3585584. 261 |
| M98T770   | 98. 01370119 | 769. 702 | 6824831. 393 |
| M98T75    | 98. 01364321 | 74. 9588 | 28008552. 85 |
| M98T718   | 98. 01375588 | 717. 959 | 10501623. 45 |

|           |              |          |              |
|-----------|--------------|----------|--------------|
| M98T48    | 98. 01371    | 47. 6391 | 13913737. 24 |
| M98T741   | 98. 0136826  | 741. 302 | 8520773. 35  |
| M98T731   | 98. 01367211 | 731. 347 | 6600926. 703 |
| M98T32_3  | 98. 01381036 | 32. 4171 | 45790449. 83 |
| M98T757_2 | 98. 01366883 | 757. 001 | 8963156. 646 |
| M98T62    | 98. 01382101 | 62. 1777 | 5679935. 131 |
| M98T783   | 98. 01368874 | 782. 558 | 7418689. 986 |
| M98T100   | 98. 03198688 | 100. 146 | 72303904. 88 |
| M98T95    | 98. 03201883 | 94. 7467 | 88433908. 29 |
| M98T107   | 98. 03197389 | 106. 513 | 53143711. 53 |
| M98T649   | 98. 03132259 | 649. 338 | 4103090. 013 |
| M98T181   | 98. 03157502 | 181. 154 | 9427584. 19  |
| M98T291   | 98. 03182098 | 291. 307 | 28178230. 68 |
| M98T143   | 98. 03203968 | 142. 85  | 25238949. 82 |
| M98T106   | 98. 05992954 | 105. 503 | 26374587. 17 |
| M98T336   | 98. 06029493 | 336. 344 | 31065282. 91 |
| M98T346   | 98. 06009401 | 345. 848 | 173209709. 2 |
| M98T321   | 98. 06038086 | 321. 198 | 37161163. 89 |
| M98T111   | 98. 09629285 | 111. 382 | 26991785. 34 |
| M99T829   | 98. 51150096 | 828. 73  | 44154997. 32 |
| M99T78_1  | 98. 51182831 | 78. 3841 | 55047741. 41 |
| M99T804   | 98. 51154699 | 804. 327 | 55288861. 53 |
| M99T770   | 98. 51157877 | 769. 702 | 94898846. 42 |
| M99T795   | 98. 5115461  | 795. 165 | 33222426. 5  |
| M99T698   | 98. 51183134 | 697. 952 | 73782610. 25 |
| M99T758   | 98. 51154967 | 758. 236 | 143309853. 1 |
| M99T69    | 98. 51181187 | 69. 2834 | 118316459. 2 |
| M99T32_1  | 98. 51350054 | 32. 4171 | 371930709. 7 |
| M99T787_1 | 98. 51155454 | 786. 569 | 84205754. 69 |
| M99T61    | 98. 95499745 | 61. 1538 | 3918628. 178 |
| M99T68_1  | 98. 95504417 | 68. 0903 | 3561731. 205 |
| M99T46    | 98. 95503646 | 46. 447  | 6330855. 895 |
| M99T119_1 | 98. 98445597 | 119. 433 | 110142893. 5 |
| M99T101   | 98. 98444168 | 101. 161 | 172245719. 4 |
| M99T163_1 | 98. 98447308 | 162. 728 | 119531807. 8 |
| M99T113   | 98. 98448734 | 112. 781 | 169329372. 6 |
| M99T135   | 98. 98446602 | 134. 574 | 103775518. 2 |
| M99T91    | 98. 98446849 | 90. 7088 | 1221304838   |
| M99T38    | 98. 99437359 | 38. 3208 | 1319456. 235 |
| M99T68_2  | 99. 01107355 | 68. 0903 | 2069935. 224 |
| M99T765   | 99. 01157472 | 765. 406 | 3683783. 117 |
| M99T32_2  | 99. 01356556 | 32. 4171 | 18014142. 09 |
| M99T42    | 99. 01116089 | 41. 798  | 3342361. 985 |
| M99T50    | 99. 01096411 | 50. 041  | 2816653. 267 |
| M99T133   | 99. 01281894 | 133. 259 | 4747938. 903 |
| M99T744   | 99. 01181723 | 744. 182 | 10198676. 12 |
| M99T158   | 99. 04384794 | 157. 773 | 108154563. 2 |
| M99T190   | 99. 04388969 | 189. 571 | 93219513. 4  |
| M99T293   | 99. 04358417 | 292. 623 | 159898562. 5 |
| M99T180   | 99. 04388372 | 179. 75  | 83605177. 6  |
| M99T250   | 99. 04386888 | 250. 144 | 254269302. 5 |
| M99T143   | 99. 04384762 | 142. 85  | 140194572. 8 |
| M99T95    | 99. 043828   | 94. 7467 | 356843027    |
| M99T198_1 | 99. 04445085 | 198. 072 | 93954104. 3  |

|           |             |         |             |
|-----------|-------------|---------|-------------|
| M99T321   | 99.0445125  | 321.198 | 137725298.4 |
| M99T104   | 99.04356597 | 104.493 | 447509674.2 |
| M99T263   | 99.05491493 | 262.529 | 3993342.796 |
| M99T59    | 99.0551219  | 58.6151 | 1118815.537 |
| M99T48    | 99.05515536 | 47.6391 | 1719485.291 |
| M99T67    | 99.0550865  | 66.9841 | 1064312.212 |
| M99T39    | 99.05521563 | 39.4128 | 1532480.82  |
| M99T346_1 | 99.06359048 | 345.848 | 7665044.675 |
| M99T102   | 99.08019898 | 102.247 | 50217519.89 |
| M99T97    | 99.0801974  | 96.7698 | 21927813.92 |
| M99T372   | 99.08082502 | 372.152 | 34798288.76 |
| M99T119_2 | 99.08009102 | 119.433 | 83341535.96 |
| M99T727   | 99.08080162 | 726.707 | 16938501.52 |
| M99T746   | 99.08073527 | 745.603 | 21072567.23 |
| M99T626   | 99.08077745 | 626.042 | 19852965.04 |
| M99T563   | 99.0806234  | 563.297 | 37103464.32 |
| M99T78_2  | 99.08053712 | 78.3841 | 39288587.05 |
| M99T270   | 99.08004215 | 269.528 | 79173118.22 |
| M99T225   | 99.08080167 | 224.729 | 304617119.5 |
| M99T682   | 99.08076788 | 681.885 | 23907793.56 |
| M99T167   | 99.08009451 | 166.613 | 143839142.1 |
| M99T619   | 99.08081705 | 618.683 | 22152494.26 |
| M99T90    | 99.08017199 | 89.6999 | 37126055.02 |
| M99T335   | 99.08081376 | 334.966 | 48151814.88 |
| M99T287   | 99.08078982 | 287.148 | 66890787.61 |
| M99T260   | 99.08006211 | 259.74  | 97711919.7  |
| M99T478   | 99.0808386  | 477.989 | 23235432.22 |
| M99T145   | 99.08013054 | 145.382 | 79008519.01 |
| M99T651   | 99.0807901  | 650.898 | 61505940.45 |
| M99T672   | 99.08014413 | 671.649 | 24689384.3  |
| M99T346_2 | 99.08078284 | 345.848 | 34331818.25 |
| M99T547   | 99.08063617 | 546.651 | 33287309.39 |
| M99T111   | 99.08019719 | 111.382 | 51458709.54 |
| M99T394   | 99.08077644 | 393.934 | 35847076.25 |
| M99T504   | 99.08082407 | 504.466 | 38434962.63 |
| M99T703   | 99.08078309 | 703.35  | 34006176.99 |
| M99T279   | 99.08005173 | 279.039 | 64076056.85 |
| M99T487   | 99.08081407 | 486.885 | 35661302.36 |
| M99T132   | 99.08013595 | 131.949 | 59755231.97 |
| M99T716   | 99.08015885 | 716.403 | 23358729.79 |
| M99T734   | 99.08010658 | 734.269 | 11545492.59 |
| M99T463   | 99.08091197 | 463.271 | 21692822.6  |
| M99T433   | 99.08084887 | 433.111 | 117009746.4 |
| M99T527   | 99.08082277 | 526.676 | 50924391.03 |
| M99T403   | 99.08085503 | 403.447 | 27470950.75 |
| M99T359   | 99.08081805 | 359.32  | 44123181.29 |
| M99T757   | 99.08002778 | 757.001 | 21297725.49 |
| M99T188   | 99.08002651 | 188.126 | 78670071.92 |
| M99T787_2 | 99.08072054 | 786.569 | 113962061.4 |
| M99T318   | 99.08085689 | 318.497 | 78919916.25 |
| M99T198_2 | 99.08006801 | 198.072 | 80126197.26 |
| M99T694   | 99.08015148 | 693.81  | 18858146.87 |
| M99T384   | 99.08086699 | 383.536 | 38922268.79 |
| M99T595   | 99.08080242 | 595.066 | 53839303.34 |

|            |             |         |             |
|------------|-------------|---------|-------------|
| M99T301    | 99.08081683 | 300.782 | 73991790.95 |
| M99T152    | 99.09135599 | 152.375 | 8358478.937 |
| M99T163_2  | 99.09138078 | 162.728 | 4056172.165 |
| M100T829_1 | 99.51232129 | 828.73  | 7582203.678 |
| M100T785   | 99.51239628 | 785.136 | 23996337.96 |
| M100T816   | 99.51237441 | 815.517 | 15195639.49 |
| M100T758   | 99.51240011 | 758.236 | 14703179.14 |
| M100T32    | 99.51189795 | 32.4171 | 43984044.43 |
| M100T151   | 99.51184113 | 151.016 | 8154440.174 |
| M100T46    | 99.53085799 | 46.447  | 313886437.4 |
| M100T75_1  | 99.53091835 | 74.9588 | 232563764.9 |
| M100T148   | 99.53091209 | 148.117 | 47467186.81 |
| M100T59    | 100.0245904 | 58.6151 | 24475744.52 |
| M100T75_2  | 100.0240908 | 74.9588 | 2742718072  |
| M100T48    | 100.0240788 | 47.6391 | 14668718.14 |
| M100T177   | 100.0232454 | 177.295 | 18748435.99 |
| M100T142   | 100.0392885 | 141.825 | 21553063.12 |
| M100T293   | 100.0472394 | 292.623 | 6657213.876 |
| M100T321   | 100.0470748 | 321.198 | 5087785.501 |
| M100T104   | 100.0470425 | 104.493 | 21769495    |
| M100T733   | 100.0754367 | 732.773 | 19206863.25 |
| M100T161   | 100.0754366 | 161.494 | 29442346.18 |
| M100T739   | 100.0759023 | 738.697 | 18312632.55 |
| M100T187   | 100.0759432 | 186.709 | 32717890.08 |
| M100T456   | 100.0759492 | 456.126 | 25483530.57 |
| M100T477   | 100.0760201 | 476.554 | 28574171.32 |
| M100T369   | 100.0759986 | 369.321 | 58197067.78 |
| M100T226   | 100.0759135 | 226.202 | 37390313.37 |
| M100T829_2 | 100.0758921 | 828.73  | 37238523.66 |
| M100T180   | 100.0755877 | 179.75  | 29985909.27 |
| M100T686   | 100.0759375 | 686.47  | 81938950.19 |
| M100T663   | 100.0758906 | 663.287 | 20884676.83 |
| M100T129   | 100.075463  | 129.234 | 27466342.48 |
| M100T788   | 100.075913  | 787.856 | 31153180.07 |
| M100T155   | 100.0760127 | 155.197 | 27853749.21 |
| M100T432   | 100.0760161 | 431.64  | 27037440.39 |
| M100T416   | 100.0760135 | 416.239 | 46407565.12 |
| M100T388   | 100.0756567 | 387.763 | 18461753.04 |
| M100T314   | 100.0759852 | 314.259 | 49997845.65 |
| M100T329   | 100.0759172 | 329.481 | 54967947.64 |
| M100T355   | 100.0760048 | 355.41  | 52239037.68 |
| M100T78    | 100.0754497 | 78.3841 | 20197450.25 |
| M100T626   | 100.0759163 | 626.042 | 34920765.86 |
| M100T136   | 100.0754492 | 135.971 | 39783454.68 |
| M100T806   | 100.0755837 | 805.823 | 43758994.83 |
| M100T398   | 100.0756365 | 397.878 | 33643679.51 |
| M100T524   | 100.0755868 | 523.735 | 124363249.9 |
| M100T381   | 100.075963  | 380.63  | 30644286.9  |
| M100T345   | 100.0756926 | 344.555 | 80334769.05 |
| M100T267   | 100.0759444 | 267.171 | 180073127.8 |
| M100T108   | 100.075661  | 107.537 | 40712060.53 |
| M100T145   | 100.0758927 | 145.382 | 36453346.92 |
| M100T577   | 100.075899  | 577.366 | 25606053.09 |
| M100T121   | 100.075668  | 120.525 | 55426906.43 |

|           |             |         |             |
|-----------|-------------|---------|-------------|
| M100T488  | 100.0759068 | 488.437 | 20905469.93 |
| M100T171  | 100.075434  | 170.665 | 36794077.68 |
| M100T780  | 100.0758443 | 780.043 | 13861868.62 |
| M100T747  | 100.0759055 | 746.977 | 22262925.44 |
| M100T601  | 100.0758969 | 601.04  | 26377568.68 |
| M100T93   | 100.0756686 | 92.7272 | 56308527.01 |
| M100T642  | 100.0758948 | 642.211 | 27451287.72 |
| M100T586  | 100.0759105 | 585.968 | 23065582.31 |
| M100T716  | 100.0759959 | 716.403 | 60312161.5  |
| M100T466  | 100.0758968 | 466.162 | 25677549.88 |
| M100T298  | 100.0759096 | 298.135 | 26117908.7  |
| M100T195  | 100.0759111 | 195.23  | 33394954.99 |
| M100T772  | 100.0759392 | 772.206 | 22695940.42 |
| M100T655  | 100.0759153 | 654.542 | 22586237.72 |
| M100T442  | 100.0760003 | 442.005 | 34696317.56 |
| M100T761  | 100.0754395 | 760.916 | 38453540.46 |
| M100T31_1 | 100.0835979 | 31.4047 | 1022051.435 |
| M100T68   | 100.0838511 | 68.0903 | 4552355.04  |
| M100T55   | 100.0839779 | 54.867  | 6901960.624 |
| M100T45   | 100.083576  | 45.3435 | 3634366.093 |
| M100T31_2 | 100.1122354 | 31.4047 | 4807569.912 |
| M100T69   | 100.112226  | 69.2834 | 6781618.616 |
| M101T69_1 | 100.5095467 | 69.2834 | 4562558.386 |
| M101T32_1 | 100.5101098 | 32.4171 | 14705955.08 |
| M101T60   | 100.9313128 | 59.9075 | 1942453.061 |
| M101T48   | 100.9313056 | 47.6391 | 1353691.928 |
| M101T69_2 | 100.9313725 | 69.2834 | 1780335.993 |
| M101T32_2 | 100.9565461 | 32.4171 | 600208.2328 |
| M101T44   | 101.0234466 | 44.1485 | 3682403.51  |
| M101T50_1 | 101.0233647 | 50.041  | 3292837.393 |
| M101T61   | 101.0233384 | 61.1538 | 5867693.982 |
| M101T142  | 101.0235493 | 141.825 | 37561032.31 |
| M101T332  | 101.0227309 | 332.2   | 4191347.992 |
| M101T163  | 101.022952  | 162.728 | 10460500.83 |
| M101T229  | 101.0232533 | 229.059 | 19068696.32 |
| M101T190  | 101.0236007 | 189.571 | 16809977.75 |
| M101T293  | 101.0226143 | 292.623 | 27934649.73 |
| M101T252  | 101.0236164 | 251.555 | 7939276.93  |
| M101T260  | 101.0236154 | 259.74  | 7996568.82  |
| M101T181  | 101.0234731 | 181.154 | 9640205.847 |
| M101T171  | 101.0229329 | 170.665 | 10576201.08 |
| M101T75_1 | 101.0244637 | 74.9588 | 357756434.9 |
| M101T239  | 101.0233156 | 238.605 | 11416620.28 |
| M101T94   | 101.0231583 | 93.7378 | 27288819.09 |
| M101T313  | 101.0235608 | 312.85  | 4622016.216 |
| M101T104  | 101.0232663 | 104.493 | 72218502.99 |
| M101T211  | 101.0235884 | 211.288 | 69203259.91 |
| M101T75_2 | 101.0526513 | 74.9588 | 16192091.26 |
| M101T106  | 101.05979   | 105.503 | 43063402.78 |
| M101T167  | 101.0598544 | 166.613 | 48870239.25 |
| M101T829  | 101.0710305 | 828.73  | 37339615.46 |
| M101T823  | 101.0709969 | 822.881 | 40389534.69 |
| M101T785  | 101.0710426 | 785.136 | 26326714.01 |
| M101T809  | 101.0710241 | 808.678 | 81431438.22 |



|            |             |         |             |
|------------|-------------|---------|-------------|
| M101T746   | 101.0710436 | 745.603 | 28191147.32 |
| M101T708   | 101.0710237 | 707.557 | 15457453.13 |
| M101T792   | 101.0710268 | 792.146 | 27190044.08 |
| M101T838   | 101.0710152 | 837.524 | 45995723.13 |
| M101T32_3  | 101.0708393 | 32.4171 | 6034727.627 |
| M101T768   | 101.0710528 | 768.166 | 31035247.13 |
| M101T760   | 101.0710344 | 759.605 | 30495934.18 |
| M101T730   | 101.0710347 | 729.798 | 47006904.46 |
| M101T68    | 101.0786198 | 68.0903 | 1867892.837 |
| M101T50_2  | 101.0786065 | 50.041  | 3965734.775 |
| M101T147   | 101.0958562 | 146.742 | 28577067.95 |
| M101T263   | 101.0963297 | 262.529 | 79679714.53 |
| M101T199   | 101.096221  | 199.43  | 31848786.59 |
| M101T165   | 101.096112  | 165.217 | 27213659.65 |
| M101T240   | 101.096211  | 239.913 | 30301958.73 |
| M101T318   | 101.0963275 | 318.497 | 16379796.41 |
| M101T118   | 101.095907  | 118.116 | 23573878.41 |
| M102T37    | 101.9838441 | 37.1891 | 1760787.906 |
| M102T44    | 101.9838355 | 44.1485 | 1822036.372 |
| M102T35_1  | 101.9998715 | 34.5397 | 1878505.786 |
| M102T46_1  | 102.0128942 | 46.447  | 6765016.291 |
| M102T230   | 102.0215659 | 230.321 | 1110423.148 |
| M102T75_1  | 102.0212513 | 74.9588 | 408388644.1 |
| M102T211   | 102.0262447 | 211.288 | 1376107.981 |
| M102T725   | 102.0333473 | 725.212 | 2706319772  |
| M102T644   | 102.0328769 | 643.727 | 1794538958  |
| M102T353   | 102.0334493 | 352.65  | 826512164.4 |
| M102T663   | 102.0333541 | 663.287 | 1931072010  |
| M102T540   | 102.0333892 | 539.764 | 1357425337  |
| M102T411   | 102.0338978 | 410.542 | 3121723986  |
| M102T497   | 102.0338427 | 497.214 | 1636320832  |
| M102T794   | 102.0336922 | 793.649 | 656621413.7 |
| M102T626   | 102.0333618 | 626.042 | 1956353342  |
| M102T516   | 102.0338285 | 516.214 | 1396192012  |
| M102T830   | 102.0340186 | 830.193 | 130001612.4 |
| M102T688   | 102.0333568 | 687.95  | 2666420653  |
| M102T807   | 102.033436  | 807.232 | 595821188.6 |
| M102T770   | 102.0334249 | 769.702 | 1638143660  |
| M102T636   | 102.0333724 | 636.473 | 1514447522  |
| M102T509   | 102.0333949 | 508.883 | 981381051.1 |
| M102T698_1 | 102.0328733 | 697.952 | 1765640394  |
| M102T572   | 102.0338291 | 571.523 | 2479739071  |
| M102T709   | 102.0333968 | 709.106 | 2956126653  |
| M102T75_2  | 102.0337156 | 74.9588 | 427992116   |
| M102T338   | 102.0338968 | 337.767 | 441819893.4 |
| M102T747   | 102.0333503 | 746.977 | 2182679949  |
| M102T471   | 102.0333571 | 470.602 | 5507230679  |
| M102T591   | 102.0333746 | 590.607 | 2145030188  |
| M102T528   | 102.0338384 | 528.185 | 1580036847  |
| M102T674_1 | 102.0338412 | 674.402 | 2691253034  |
| M102T611   | 102.0333784 | 611.145 | 2667116754  |
| M102T299   | 102.0338939 | 299.493 | 230240751.7 |
| M102T757   | 102.0334007 | 757.001 | 2039578230  |
| M102T655   | 102.033401  | 654.542 | 1347236153  |

|            |              |          |              |
|------------|--------------|----------|--------------|
| M102T734   | 102. 0333559 | 734. 269 | 1895025716   |
| M102T821   | 102. 033421  | 821. 334 | 239677331. 5 |
| M102T379   | 102. 0338597 | 379. 194 | 2196961794   |
| M102T35_2  | 102. 0333341 | 34. 5397 | 1198809553   |
| M102T783   | 102. 0334423 | 782. 558 | 1173802191   |
| M102T147   | 102. 054901  | 146. 742 | 110330807. 9 |
| M102T90    | 102. 0545863 | 89. 6999 | 1099377308   |
| M102T176   | 102. 0549347 | 175. 952 | 84254437. 67 |
| M102T57    | 102. 0627791 | 57. 4179 | 2722867. 536 |
| M102T46_2  | 102. 067107  | 46. 447  | 415668. 7729 |
| M102T698_2 | 102. 0673065 | 697. 952 | 3513885. 553 |
| M102T69    | 102. 0627183 | 69. 2834 | 2049930. 575 |
| M102T674_2 | 102. 0672468 | 674. 402 | 6154034. 149 |
| M102T35_3  | 102. 0671725 | 34. 5397 | 2544090. 225 |
| M102T100   | 102. 0910412 | 100. 146 | 37951966. 94 |
| M102T406   | 102. 0912639 | 406. 289 | 31103699. 97 |
| M102T207   | 102. 1023265 | 207. 393 | 70792641. 25 |
| M102T32    | 102. 1275559 | 32. 4171 | 5064840. 577 |
| M102T438   | 102. 1275751 | 437. 571 | 11637093. 12 |
| M103T456   | 102. 5347402 | 456. 126 | 296312904. 6 |
| M103T772   | 102. 5347306 | 772. 206 | 117467269. 4 |
| M103T588   | 102. 5323119 | 587. 521 | 14741846. 75 |
| M103T663   | 102. 5355422 | 663. 287 | 122679850. 6 |
| M103T794   | 102. 5355052 | 793. 649 | 45347258. 53 |
| M103T496   | 102. 5356898 | 495. 779 | 62371699. 36 |
| M103T721   | 102. 5355269 | 720. 704 | 161995088. 2 |
| M103T626   | 102. 5352037 | 626. 042 | 505006766    |
| M103T74_1  | 102. 5355817 | 73. 8324 | 56068114. 42 |
| M103T399   | 102. 535525  | 399. 046 | 79393192. 7  |
| M103T813   | 102. 5356654 | 812. 862 | 18713161. 92 |
| M103T535   | 102. 535257  | 535. 329 | 298615846. 2 |
| M103T804   | 102. 5356301 | 804. 327 | 43763269. 98 |
| M103T688   | 102. 5355265 | 687. 95  | 97128812. 34 |
| M103T388   | 102. 5355524 | 387. 763 | 55181252. 29 |
| M103T698   | 102. 5355426 | 697. 952 | 137091021. 6 |
| M103T572   | 102. 535561  | 571. 523 | 167437511. 1 |
| M103T709   | 102. 5355394 | 709. 106 | 160145853. 6 |
| M103T509   | 102. 5355924 | 508. 883 | 128573043. 4 |
| M103T747   | 102. 5354957 | 746. 977 | 170848152. 5 |
| M103T487   | 102. 5356501 | 486. 885 | 83403818. 75 |
| M103T674   | 102. 5355117 | 674. 402 | 156360130. 1 |
| M103T757   | 102. 5354653 | 757. 001 | 139190220. 7 |
| M103T734   | 102. 5355289 | 734. 269 | 144653508. 3 |
| M103T301   | 102. 5355369 | 300. 782 | 20964897. 55 |
| M103T35_1  | 102. 5352444 | 34. 5397 | 69035475. 29 |
| M103T783_1 | 102. 5355639 | 782. 558 | 86713101. 96 |
| M103T347   | 102. 5355181 | 347. 175 | 82494837. 33 |
| M103T50    | 102. 9699542 | 50. 041  | 76307168. 29 |
| M103T75    | 102. 9702027 | 74. 9588 | 165746024. 2 |
| M103T708   | 103. 0327463 | 707. 557 | 10111488. 31 |
| M103T639   | 103. 031585  | 639. 219 | 28152742. 21 |
| M103T601   | 103. 0315961 | 601. 04  | 9775385. 162 |
| M103T570   | 103. 0315814 | 570. 01  | 8093760. 543 |
| M103T694   | 103. 0316048 | 693. 81  | 21026298. 93 |

|            |             |         |             |
|------------|-------------|---------|-------------|
| M103T35_2  | 103.0316138 | 34.5397 | 5899724.644 |
| M103T264   | 103.0387662 | 264.079 | 80896786.94 |
| M103T165   | 103.0385497 | 165.217 | 77039901.13 |
| M103T97    | 103.038807  | 96.7698 | 363317512.5 |
| M103T143   | 103.0385583 | 142.85  | 466580050.2 |
| M103T218   | 103.0389512 | 217.866 | 55803979.37 |
| M103T279   | 103.0387417 | 279.039 | 83801577.14 |
| M103T188   | 103.0387439 | 188.126 | 55822856.01 |
| M103T178   | 103.0385731 | 178.408 | 73907421.09 |
| M103T38    | 103.0500906 | 38.3208 | 7265744.74  |
| M103T725   | 103.0503435 | 725.212 | 11881759.93 |
| M103T746   | 103.0502414 | 745.603 | 8670769.862 |
| M103T74_2  | 103.050095  | 73.8324 | 86958951.29 |
| M103T816   | 103.0502825 | 815.517 | 8882407.555 |
| M103T771   | 103.0503891 | 771.042 | 9950306.24  |
| M103T758   | 103.0502771 | 758.236 | 14894217.37 |
| M103T832   | 103.0502687 | 831.709 | 12678819.23 |
| M103T737   | 103.0502917 | 737.198 | 7659665.548 |
| M103T798   | 103.0503081 | 797.773 | 19121409.23 |
| M103T54    | 103.0500029 | 53.6731 | 2158349.136 |
| M103T783_2 | 103.0503883 | 782.558 | 10906114.76 |
| M103T405   | 103.0532698 | 404.872 | 1623060.705 |
| M103T90    | 103.0579777 | 89.6999 | 38059123.68 |
| M103T393   | 103.074569  | 392.715 | 1924223.592 |
| M103T206   | 103.1058824 | 205.903 | 1489838.619 |
| M103T76    | 103.1226065 | 76.0874 | 12472483.67 |
| M104T148   | 103.5201271 | 148.117 | 997169.2698 |
| M104T241   | 103.5382291 | 241.368 | 7746188.42  |
| M104T708   | 104.0302134 | 707.557 | 30584692.83 |
| M104T698   | 104.0301574 | 697.952 | 37040742.48 |
| M104T733   | 104.0301466 | 732.773 | 43331455.28 |
| M104T642   | 104.03016   | 642.211 | 51380820.43 |
| M104T674   | 104.0295086 | 674.402 | 62132657.13 |
| M104T655   | 104.02951   | 654.542 | 26157833.98 |
| M104T35    | 104.0299001 | 34.5397 | 26732940.16 |
| M104T783   | 104.0294662 | 782.558 | 21671654.51 |
| M104T101   | 104.04187   | 101.161 | 5443607.742 |
| M104T96    | 104.0418851 | 95.7572 | 3594799.27  |
| M104T46    | 104.041973  | 46.447  | 2749191.458 |
| M104T62    | 104.0419934 | 62.1777 | 1545381.96  |
| M104T55    | 104.0419612 | 54.867  | 1797245.022 |
| M104T75    | 104.0486508 | 74.9588 | 11391696.47 |
| M104T649   | 104.0547336 | 649.338 | 1245488.64  |
| M104T345   | 104.0571357 | 344.555 | 5830719.638 |
| M104T393   | 104.0696494 | 392.715 | 25606368.75 |
| M104T91    | 104.0711395 | 90.7088 | 3853165226  |
| M104T137   | 104.1061223 | 137.373 | 41705571.33 |
| M104T99    | 104.1059875 | 98.9918 | 565094849.4 |
| M104T88    | 104.107084  | 87.6739 | 21002848444 |
| M104T838   | 104.1066007 | 837.524 | 14210907.13 |
| M104T32    | 104.1065915 | 32.4171 | 67118498.26 |
| M104T111   | 104.1061092 | 111.382 | 132290726.1 |
| M104T155   | 104.1060819 | 155.197 | 55213697.56 |
| M104T823   | 104.1065875 | 822.881 | 30271085.98 |

|          |             |         |             |
|----------|-------------|---------|-------------|
| M105T61  | 105.0029036 | 61.1538 | 6713278.129 |
| M105T74  | 105.002879  | 73.8324 | 1191067192  |
| M105T52  | 105.002936  | 52.4521 | 4195141.165 |
| M105T45  | 105.0158229 | 45.3435 | 1058267.185 |
| M105T164 | 105.0178831 | 163.846 | 1941573.441 |
| M105T659 | 105.0179723 | 658.953 | 20017992.3  |
| M105T456 | 105.0332147 | 456.126 | 2182825.436 |
| M105T487 | 105.033244  | 486.885 | 7729081.928 |
| M105T70  | 105.0330775 | 70.3428 | 2362254.068 |
| M105T767 | 105.0416015 | 766.742 | 23315944.21 |
| M105T669 | 105.0690249 | 668.867 | 15065299.92 |
| M105T649 | 105.068764  | 649.338 | 31389758.23 |
| M105T682 | 105.0690839 | 681.885 | 11058642.81 |
| M105T789 | 105.0693646 | 789.293 | 12569755.82 |
| M105T562 | 105.068987  | 561.955 | 103569612   |
| M105T718 | 105.0690481 | 717.959 | 11654262.28 |
| M105T703 | 105.0690047 | 703.35  | 32226208.38 |
| M105T545 | 105.0689775 | 545.203 | 27505656.42 |
| M105T694 | 105.068945  | 693.81  | 14979321.32 |
| M105T384 | 105.0695888 | 383.536 | 41660879.32 |
| M105T802 | 105.0689632 | 801.685 | 6920361.841 |
| M105T91  | 105.0735464 | 90.7088 | 151276634   |
| M105T99  | 105.1096771 | 98.9918 | 21402123.04 |
| M105T88  | 105.1098932 | 87.6739 | 982927943.3 |
| M106T31  | 105.9534703 | 31.4047 | 1971449.681 |
| M106T74  | 106.0036762 | 73.8324 | 146078963.4 |
| M106T241 | 106.040979  | 241.368 | 14672405.26 |
| M106T127 | 106.0495457 | 126.785 | 25523616.92 |
| M106T110 | 106.0495461 | 110.047 | 14801636.06 |
| M106T87  | 106.0492762 | 86.6643 | 1585301655  |
| M106T91  | 106.0744098 | 90.7088 | 11858919.08 |
| M106T88  | 106.1112421 | 87.6739 | 40603864.35 |
| M107T75  | 107.0003587 | 74.9588 | 191858129.8 |
| M107T147 | 107.0393151 | 146.742 | 2040550.657 |
| M107T770 | 107.0487719 | 769.702 | 11447409.11 |
| M107T345 | 107.0488274 | 344.555 | 24250659.98 |
| M107T323 | 107.0488101 | 322.536 | 8206857.803 |
| M107T172 | 107.0488212 | 171.935 | 8557257.268 |
| M107T381 | 107.0487778 | 380.63  | 14425127.43 |
| M107T218 | 107.0487858 | 217.866 | 17192273.82 |
| M107T543 | 107.0486741 | 542.766 | 6833449.072 |
| M107T744 | 107.0487168 | 744.182 | 12148679.03 |
| M107T368 | 107.0487945 | 367.949 | 9755792.458 |
| M107T241 | 107.0575347 | 241.368 | 1911776.961 |
| M107T87  | 107.0527457 | 86.6643 | 42908572.69 |
| M107T252 | 107.0599428 | 251.555 | 927836.8541 |
| M107T582 | 107.0699637 | 581.625 | 3545636.609 |
| M107T39  | 107.0699383 | 39.4128 | 8088204.858 |
| M107T210 | 107.0698842 | 210.186 | 2285989.226 |
| M107T436 | 107.0852173 | 436.069 | 16691618.04 |
| M107T669 | 107.0843733 | 668.867 | 23088435.17 |
| M107T649 | 107.0854675 | 649.338 | 27914845.06 |
| M107T451 | 107.0852609 | 450.503 | 15112875.36 |
| M107T682 | 107.0846893 | 681.885 | 17263361.28 |

|            |             |         |             |
|------------|-------------|---------|-------------|
| M107T702   | 107.0846576 | 702.055 | 49509854.21 |
| M107T562   | 107.0845138 | 561.955 | 102691183.5 |
| M107T545   | 107.0851332 | 545.203 | 36253970.92 |
| M108T121   | 107.5043073 | 120.525 | 6157401.489 |
| M108T113   | 107.5043383 | 112.781 | 4451258.854 |
| M108T233   | 107.5989449 | 233.081 | 1363640.818 |
| M108T69    | 107.9499488 | 69.2834 | 2310640.283 |
| M108T63    | 107.9499845 | 63.4448 | 4813718.291 |
| M108T48    | 107.9500323 | 47.6391 | 2506737.895 |
| M108T55    | 107.9499751 | 54.867  | 4466854.712 |
| M108T788   | 108.0218098 | 787.856 | 136188757.4 |
| M108T834   | 108.0221139 | 834.486 | 21380621.64 |
| M108T760   | 108.0219665 | 759.605 | 193977244.2 |
| M108T820   | 108.0221332 | 819.78  | 72909094.87 |
| M108T803   | 108.021774  | 802.88  | 72019741.05 |
| M108T35    | 108.0224483 | 34.5397 | 14596336.33 |
| M108T435   | 108.0435362 | 434.589 | 11191526.48 |
| M108T106   | 108.0438595 | 105.503 | 154920105.3 |
| M108T465   | 108.0435005 | 464.668 | 12396236.12 |
| M108T133   | 108.0438854 | 133.259 | 75781277.15 |
| M108T384   | 108.0433973 | 383.536 | 34133101.96 |
| M109T139   | 108.5122282 | 138.766 | 851650.1551 |
| M109T211   | 108.5121259 | 211.288 | 6455137.339 |
| M109T794_1 | 108.5231389 | 793.649 | 11746597.34 |
| M109T757   | 108.5231553 | 757.001 | 8008293.011 |
| M109T35    | 108.5231045 | 34.5397 | 1581110.953 |
| M109T783_1 | 108.5231284 | 782.558 | 8519670.376 |
| M109T82    | 108.9482285 | 82.0569 | 4070730.62  |
| M109T74    | 108.9610057 | 73.8324 | 7142396.351 |
| M109T54    | 108.9578585 | 53.6731 | 3590931.858 |
| M109T746   | 109.0216736 | 745.603 | 240570319.1 |
| M109T794_2 | 109.0216826 | 793.649 | 56555438.94 |
| M109T33    | 109.0221799 | 33.467  | 113115266.5 |
| M109T830_1 | 109.021659  | 830.193 | 27159771.09 |
| M109T807   | 109.0216813 | 807.232 | 83918901.6  |
| M109T698   | 109.022385  | 697.952 | 74977611.18 |
| M109T69    | 109.0217058 | 69.2834 | 3629102.58  |
| M109T690   | 109.0222104 | 689.5   | 75813505.8  |
| M109T760   | 109.0216895 | 759.605 | 182864881.6 |
| M109T821   | 109.0216927 | 821.334 | 32789176.35 |
| M109T713   | 109.0223421 | 713.464 | 164764470.6 |
| M109T772_1 | 109.022394  | 772.206 | 126135396.9 |
| M109T677   | 109.0221742 | 677.376 | 76541725.69 |
| M109T730   | 109.0217895 | 729.798 | 369122500   |
| M109T783_2 | 109.0225639 | 782.558 | 113769401.5 |
| M109T101   | 109.0279755 | 101.161 | 282590826.1 |
| M109T107   | 109.0282474 | 106.513 | 262955052.3 |
| M109T163   | 109.0282281 | 162.728 | 174762737.6 |
| M109T293   | 109.0279826 | 292.623 | 142586931.1 |
| M109T181   | 109.0279653 | 181.154 | 86762412    |
| M109T652   | 109.0280539 | 651.956 | 98282294.74 |
| M109T659   | 109.0284713 | 658.953 | 77516807.94 |
| M109T94    | 109.0279222 | 93.7378 | 341122927.4 |
| M109T188   | 109.0282379 | 188.126 | 100634694.1 |

|            |             |         |             |
|------------|-------------|---------|-------------|
| M109T143   | 109.0282051 | 142.85  | 165054913.2 |
| M109T121   | 109.0279809 | 120.525 | 148681338.1 |
| M109T239   | 109.0280331 | 238.605 | 53014592.36 |
| M109T559   | 109.0277362 | 559.459 | 9978817.535 |
| M109T359   | 109.0280238 | 359.32  | 572717289.9 |
| M109T443   | 109.0275706 | 443.256 | 68355300.01 |
| M109T209   | 109.0279954 | 208.905 | 70602821.73 |
| M109T426   | 109.0282206 | 425.909 | 66112216.31 |
| M109T36    | 109.0411064 | 35.8675 | 3405184.289 |
| M109T44_1  | 109.0410933 | 44.1485 | 1341634.122 |
| M109T382   | 109.0474403 | 382.125 | 1166059.653 |
| M109T37    | 109.0645343 | 37.1891 | 3443161.814 |
| M109T44_2  | 109.0645755 | 44.1485 | 3829343.656 |
| M109T598   | 109.0645721 | 598.125 | 10578279.62 |
| M109T51    | 109.0645968 | 51.1942 | 6350554.622 |
| M109T543   | 109.0644579 | 542.766 | 14404061.21 |
| M109T67    | 109.0645959 | 66.9841 | 2020947.994 |
| M109T144   | 109.0755988 | 143.959 | 13472564.24 |
| M109T158   | 109.0755917 | 157.773 | 9275741.765 |
| M109T98    | 109.0755486 | 97.7824 | 13124871.85 |
| M109T109   | 109.0756855 | 108.698 | 8650256.6   |
| M109T791   | 109.1002903 | 790.802 | 39452028.48 |
| M109T522   | 109.1009047 | 522.177 | 37775201.97 |
| M109T605   | 109.1002894 | 605.264 | 23870809.01 |
| M109T649   | 109.1012846 | 649.338 | 195784381.2 |
| M109T660   | 109.1005738 | 660.455 | 73463389.18 |
| M109T682   | 109.1001976 | 681.885 | 59956369.96 |
| M109T830_2 | 109.100168  | 830.193 | 22852341.17 |
| M109T670   | 109.1001693 | 670.166 | 67832949.93 |
| M109T562   | 109.1009164 | 561.955 | 539762427.6 |
| M109T816   | 109.100196  | 815.517 | 31832016.22 |
| M109T692   | 109.1002998 | 692.461 | 58407135.6  |
| M109T620   | 109.100384  | 620.172 | 29292618.1  |
| M109T719   | 109.1001161 | 719.215 | 76404479.08 |
| M109T751   | 109.1002503 | 751.333 | 29439325.19 |
| M109T703   | 109.1012089 | 703.35  | 215210004.2 |
| M109T545   | 109.1013283 | 545.203 | 233355380.8 |
| M109T632   | 109.10028   | 631.982 | 41461063.53 |
| M109T800   | 109.1003344 | 800.484 | 19202927.1  |
| M109T741   | 109.1002581 | 741.302 | 32444203.39 |
| M109T576   | 109.1001564 | 575.878 | 46166318.2  |
| M109T772_2 | 109.100285  | 772.206 | 33506587.33 |
| M109T588   | 109.1003502 | 587.521 | 34031307.98 |
| M110T663_1 | 109.5231086 | 663.287 | 18962469.5  |
| M110T794_1 | 109.5213283 | 793.649 | 122518939.7 |
| M110T33_1  | 109.5213112 | 33.467  | 251671606.2 |
| M110T644   | 109.5209205 | 643.727 | 44681616.35 |
| M110T806   | 109.5207566 | 805.823 | 163853389.1 |
| M110T756   | 109.5208097 | 755.537 | 647905022   |
| M110T827   | 109.5209168 | 827.271 | 158691171.5 |
| M110T783_1 | 109.5212967 | 782.558 | 163505163.7 |
| M110T691   | 109.5231484 | 691.022 | 73651790.16 |
| M110T32    | 109.9820478 | 32.4171 | 3259877.294 |
| M110T39    | 110.0083417 | 39.4128 | 2346891.911 |

|            |             |         |             |
|------------|-------------|---------|-------------|
| M110T75    | 110.0083091 | 74.9588 | 4079522824  |
| M110T49    | 110.0083373 | 48.7362 | 30250492.05 |
| M110T69    | 110.0187223 | 69.2834 | 75068840.64 |
| M110T33_2  | 110.019787  | 33.467  | 1866587657  |
| M110T600   | 110.0192319 | 599.621 | 677219313.9 |
| M110T579   | 110.0192189 | 578.816 | 432322432.8 |
| M110T829   | 110.0190949 | 828.73  | 490994381.7 |
| M110T663_2 | 110.0193694 | 663.287 | 810588979.4 |
| M110T540   | 110.0192277 | 539.764 | 380044222.3 |
| M110T794_2 | 110.0192398 | 793.649 | 897458323.6 |
| M110T626   | 110.0192358 | 626.042 | 762161329.8 |
| M110T688   | 110.0193724 | 687.95  | 1282929636  |
| M110T388   | 110.0192092 | 387.763 | 459911062.9 |
| M110T731   | 110.0192369 | 731.347 | 16319341063 |
| M110T642   | 110.0193696 | 642.211 | 1018416133  |
| M110T570   | 110.0193596 | 570.01  | 427905396.3 |
| M110T820   | 110.0187029 | 819.78  | 746447736   |
| M110T551   | 110.0193625 | 550.919 | 514816845.3 |
| M110T611   | 110.0192331 | 611.145 | 877905957.6 |
| M110T655   | 110.0193542 | 654.542 | 539673477.7 |
| M110T402   | 110.0192281 | 401.963 | 535790551.9 |
| M110T589   | 110.0194968 | 589.053 | 568123608.4 |
| M110T783_2 | 110.019246  | 782.558 | 1789867539  |
| M110T804   | 110.0205669 | 804.327 | 1208925624  |
| M110T677   | 110.0201964 | 677.376 | 559705485.8 |
| M110T293   | 110.0312912 | 292.623 | 7365507.911 |
| M110T95    | 110.0312891 | 94.7467 | 19909857.96 |
| M110T359   | 110.0311829 | 359.32  | 33255746.44 |
| M110T426   | 110.0314152 | 425.909 | 3255233.191 |
| M110T104_1 | 110.0313543 | 104.493 | 26373116.15 |
| M110T743   | 110.0570429 | 742.68  | 2752851.728 |
| M110T751   | 110.0570289 | 751.333 | 5509214.526 |
| M110T760   | 110.0570035 | 759.605 | 3275288.315 |
| M110T734   | 110.057055  | 734.269 | 3872410.747 |
| M110T147   | 110.0593195 | 146.742 | 348833108.6 |
| M110T183   | 110.0593892 | 182.574 | 93135651.1  |
| M110T241   | 110.0594705 | 241.368 | 54155809.53 |
| M110T165   | 110.0593168 | 165.217 | 201943778.4 |
| M110T389   | 110.0593603 | 389.035 | 22054014.03 |
| M110T510   | 110.0591878 | 510.333 | 194394452.3 |
| M110T197   | 110.0594623 | 196.644 | 65766619.22 |
| M110T530   | 110.0591833 | 529.713 | 151918758.1 |
| M110T156   | 110.0593656 | 156.393 | 565786486.5 |
| M110T104_2 | 110.0596994 | 104.493 | 89298280.64 |
| M110T84    | 110.0708071 | 83.5661 | 5305035.501 |
| M110T207   | 110.0709775 | 207.393 | 47416039.99 |
| M110T649   | 110.1040952 | 649.338 | 16667203.41 |
| M110T660   | 110.1041418 | 660.455 | 5831266.067 |
| M110T682   | 110.1040737 | 681.885 | 4210172.362 |
| M110T670   | 110.1041034 | 670.166 | 5057931.919 |
| M110T562   | 110.104127  | 561.955 | 46642150.19 |
| M110T718   | 110.1042075 | 717.959 | 5707464.998 |
| M110T703   | 110.1040194 | 703.35  | 15213608.89 |
| M110T545   | 110.104041  | 545.203 | 18304024.4  |

|            |              |          |              |
|------------|--------------|----------|--------------|
| M110T694   | 110. 1040857 | 693. 81  | 4168367. 045 |
| M110T576   | 110. 1042195 | 575. 878 | 3444586. 166 |
| M111T829_1 | 110. 5216668 | 828. 73  | 53892073. 47 |
| M111T663_1 | 110. 5216118 | 663. 287 | 67337593. 86 |
| M111T33_1  | 110. 5211779 | 33. 467  | 136246072    |
| M111T644   | 110. 5216201 | 643. 727 | 79576561. 7  |
| M111T806   | 110. 5216543 | 805. 823 | 93924662. 71 |
| M111T688_1 | 110. 5216644 | 687. 95  | 134972878. 1 |
| M111T795_1 | 110. 5216242 | 795. 165 | 72735084. 98 |
| M111T698_1 | 110. 5208905 | 697. 952 | 95271820. 38 |
| M111T733   | 110. 5216808 | 732. 773 | 150027933. 6 |
| M111T818   | 110. 5216651 | 818. 418 | 55658301. 91 |
| M111T69    | 110. 5212004 | 69. 2834 | 4789263. 366 |
| M111T747   | 110. 5217155 | 746. 977 | 312567154. 1 |
| M111T760   | 110. 5216586 | 759. 605 | 234989795. 8 |
| M111T674   | 110. 5216873 | 674. 402 | 91777048. 89 |
| M111T655   | 110. 5216473 | 654. 542 | 41040196. 55 |
| M111T713   | 110. 5217002 | 713. 464 | 254715164. 7 |
| M111T772   | 110. 5216808 | 772. 206 | 193936221. 3 |
| M111T783_1 | 110. 5216863 | 782. 558 | 151211323. 4 |
| M111T60    | 111. 0093737 | 59. 9075 | 2283164. 146 |
| M111T163   | 111. 0072879 | 162. 728 | 157560422. 2 |
| M111T74    | 111. 0092375 | 73. 8324 | 483517003    |
| M111T252   | 111. 0080986 | 251. 555 | 2938435. 928 |
| M111T725   | 111. 0189556 | 725. 212 | 1548506127   |
| M111T809   | 111. 0196932 | 808. 678 | 1300215572   |
| M111T746   | 111. 0188909 | 745. 603 | 1445582289   |
| M111T794_1 | 111. 0196533 | 793. 649 | 1524154852   |
| M111T33_2  | 111. 0198116 | 33. 467  | 514307416. 6 |
| M111T688_2 | 111. 0188165 | 687. 95  | 335000475    |
| M111T698_2 | 111. 0196901 | 697. 952 | 376547599. 9 |
| M111T768   | 111. 01969   | 768. 166 | 1995178973   |
| M111T757   | 111. 01972   | 757. 001 | 1537498715   |
| M111T826   | 111. 0188269 | 825. 74  | 2158774730   |
| M111T783_2 | 111. 0197449 | 782. 558 | 1833550439   |
| M111T557   | 111. 0385482 | 556. 816 | 224371856. 1 |
| M111T829_2 | 111. 0386135 | 828. 73  | 34860498. 99 |
| M111T36    | 111. 0386208 | 35. 8675 | 326554336. 6 |
| M111T663_2 | 111. 0379169 | 663. 287 | 569283679    |
| M111T540   | 111. 0385717 | 539. 764 | 348049908. 3 |
| M111T794_2 | 111. 0379243 | 793. 649 | 207846128. 6 |
| M111T496   | 111. 0389762 | 495. 779 | 354929337. 7 |
| M111T367   | 111. 038614  | 366. 514 | 291664461. 6 |
| M111T430   | 111. 0390189 | 430. 131 | 208232964    |
| M111T804   | 111. 0379134 | 804. 327 | 107224684. 1 |
| M111T388   | 111. 0386    | 387. 763 | 400856472. 1 |
| M111T531   | 111. 0385892 | 531. 127 | 488485805. 4 |
| M111T345   | 111. 0386331 | 344. 555 | 168596138    |
| M111T676   | 111. 03769   | 675. 866 | 556606483. 2 |
| M111T515   | 111. 038609  | 514. 727 | 438639043. 3 |
| M111T507   | 111. 0385824 | 507. 343 | 348392652. 6 |
| M111T75    | 111. 0383156 | 74. 9588 | 153717143. 4 |
| M111T549   | 111. 0385628 | 549. 375 | 313042210. 9 |
| M111T719   | 111. 0379978 | 719. 215 | 500170005. 5 |



|            |              |          |              |
|------------|--------------|----------|--------------|
| M111T758   | 111. 0379166 | 758. 236 | 869690755. 7 |
| M111T468   | 111. 037979  | 467. 706 | 530440030. 9 |
| M111T625   | 111. 0377401 | 624. 608 | 2905550742   |
| M111T568   | 111. 0379773 | 568. 464 | 407797162. 1 |
| M111T487   | 111. 03792   | 486. 885 | 342910170. 7 |
| M111T695   | 111. 0379281 | 695. 155 | 835040970. 2 |
| M111T820_1 | 111. 0380228 | 819. 78  | 63544904. 09 |
| M111T402   | 111. 0379069 | 401. 963 | 576365704. 8 |
| M111T448   | 111. 0390215 | 447. 531 | 226596023. 8 |
| M111T783_3 | 111. 0379736 | 782. 558 | 238750997. 4 |
| M111T306   | 111. 0435891 | 306. 247 | 51196489. 32 |
| M111T143   | 111. 0429501 | 142. 85  | 58298806. 04 |
| M111T92_1  | 111. 0436239 | 91. 7174 | 81330208. 58 |
| M111T276   | 111. 0438719 | 276. 414 | 88155563. 56 |
| M111T107   | 111. 043586  | 106. 513 | 133135733. 3 |
| M111T185   | 111. 0548607 | 185. 398 | 16902751. 57 |
| M111T103   | 111. 0549886 | 103. 423 | 22138923. 67 |
| M111T92_2  | 111. 0550364 | 91. 7174 | 26764154. 65 |
| M111T510   | 111. 0630602 | 510. 333 | 12230752. 59 |
| M111T530   | 111. 0630124 | 529. 713 | 8957270. 032 |
| M111T240   | 111. 0630827 | 239. 913 | 3175350. 537 |
| M111T156   | 111. 0628278 | 156. 393 | 64131448. 86 |
| M111T544   | 111. 079544  | 544. 056 | 18114761. 87 |
| M111T562   | 111. 0794697 | 561. 955 | 22482642. 44 |
| M111T311   | 111. 0913477 | 311. 445 | 8280649. 484 |
| M111T807   | 111. 0915322 | 807. 232 | 16667413. 89 |
| M111T795_2 | 111. 0915065 | 795. 165 | 7638928. 291 |
| M111T838   | 111. 0914957 | 837. 524 | 22615826. 28 |
| M111T820_2 | 111. 0915416 | 819. 78  | 17156351. 82 |
| M111T298   | 111. 0911845 | 298. 135 | 6852745. 037 |
| M112T698_1 | 111. 5183576 | 697. 952 | 14640030. 82 |
| M112T794_1 | 111. 5216268 | 793. 649 | 622594615. 5 |
| M112T33_1  | 111. 5216011 | 33. 467  | 43135980. 14 |
| M112T728   | 111. 5219244 | 728. 25  | 144412491. 4 |
| M112T758_1 | 111. 5219485 | 758. 236 | 121250231. 7 |
| M112T65    | 111. 5216335 | 64. 6213 | 5407665. 886 |
| M112T456   | 111. 540637  | 456. 126 | 34696276. 39 |
| M112T725   | 111. 5407762 | 725. 212 | 72459520. 07 |
| M112T644   | 111. 5406401 | 643. 727 | 33396242. 08 |
| M112T540   | 111. 5405485 | 539. 764 | 28068675. 97 |
| M112T432_1 | 111. 5405788 | 431. 64  | 31143059. 56 |
| M112T626   | 111. 5406773 | 626. 042 | 50007257. 74 |
| M112T748   | 111. 5407094 | 748. 486 | 54371550. 31 |
| M112T666   | 111. 5407341 | 666. 137 | 45798446. 22 |
| M112T789   | 111. 5407672 | 789. 293 | 29064955. 94 |
| M112T770   | 111. 54084   | 769. 702 | 27247755. 46 |
| M112T636   | 111. 540709  | 636. 473 | 32215719. 19 |
| M112T531   | 111. 5405698 | 531. 127 | 27978301. 35 |
| M112T73    | 111. 540245  | 72. 6708 | 6299584. 086 |
| M112T676   | 111. 5407706 | 675. 866 | 46161134. 59 |
| M112T709   | 111. 5408656 | 709. 106 | 42289821. 74 |
| M112T695   | 111. 5407435 | 695. 155 | 66231541. 73 |
| M112T403   | 111. 5406086 | 403. 447 | 55544232. 27 |
| M112T365   | 111. 5405571 | 365. 061 | 22743715. 27 |

|            |              |          |              |
|------------|--------------|----------|--------------|
| M112T655   | 111. 5404902 | 654. 542 | 39556136. 79 |
| M112T588   | 111. 5404508 | 587. 521 | 141324515. 7 |
| M112T35    | 111. 5403138 | 34. 5397 | 19757347. 51 |
| M112T327   | 111. 5405963 | 326. 78  | 16528570. 36 |
| M112T320   | 111. 5888625 | 319. 758 | 8924569. 174 |
| M112T225   | 111. 9677912 | 224. 729 | 6549668. 836 |
| M112T31    | 111. 9679913 | 31. 4047 | 7889889. 418 |
| M112T192   | 111. 9678559 | 192. 437 | 3834729. 717 |
| M112T70    | 111. 9680112 | 70. 3428 | 9392515. 304 |
| M112T60_1  | 111. 9840442 | 59. 9075 | 1055465. 07  |
| M112T36    | 111. 9840353 | 35. 8675 | 6150387. 915 |
| M112T67    | 111. 9839522 | 66. 9841 | 703587. 5599 |
| M112T60_2  | 112. 0058635 | 59. 9075 | 2379643. 951 |
| M112T75    | 112. 0057549 | 74. 9588 | 518428151. 3 |
| M112T51    | 112. 0058596 | 51. 1942 | 887616. 2151 |
| M112T164   | 112. 0105657 | 163. 846 | 7030518. 409 |
| M112T746   | 112. 0168442 | 745. 603 | 696617844. 5 |
| M112T727   | 112. 0168721 | 726. 707 | 646215437. 9 |
| M112T794_2 | 112. 0171854 | 793. 649 | 600146650. 3 |
| M112T33_2  | 112. 0172228 | 33. 467  | 212193303. 6 |
| M112T807   | 112. 016825  | 807. 232 | 911598449. 8 |
| M112T824   | 112. 0173938 | 824. 311 | 881685628. 1 |
| M112T698_2 | 112. 0181109 | 697. 952 | 149713426. 8 |
| M112T712   | 112. 0180911 | 711. 984 | 303638842. 3 |
| M112T758_2 | 112. 0172241 | 758. 236 | 549567916. 7 |
| M112T768   | 112. 0173886 | 768. 166 | 495179937    |
| M112T783   | 112. 0172403 | 782. 558 | 625778791. 8 |
| M112T161   | 112. 0390564 | 161. 494 | 141699526. 8 |
| M112T271   | 112. 0382666 | 270. 983 | 44075270. 52 |
| M112T106_1 | 112. 0387645 | 105. 503 | 87851965. 19 |
| M112T169   | 112. 0389668 | 169. 221 | 166928698. 8 |
| M112T393   | 112. 0381677 | 392. 715 | 30900311. 38 |
| M112T446_1 | 112. 0382015 | 445. 984 | 20217893. 43 |
| M112T177   | 112. 0387917 | 177. 295 | 130279319. 4 |
| M112T260   | 112. 0495753 | 259. 74  | 21765864. 35 |
| M112T143_1 | 112. 0496326 | 142. 85  | 71064596. 79 |
| M112T121   | 112. 0501335 | 120. 525 | 13567854. 45 |
| M112T374   | 112. 0470602 | 373. 532 | 2938029. 275 |
| M112T338   | 112. 0470425 | 337. 767 | 4300512. 306 |
| M112T93    | 112. 0497207 | 92. 7272 | 69378859. 26 |
| M112T106_2 | 112. 0497374 | 105. 503 | 291824114. 7 |
| M112T432_2 | 112. 0750871 | 431. 64  | 22457274. 12 |
| M112T544   | 112. 0750611 | 544. 056 | 17237456. 19 |
| M112T446_2 | 112. 0750871 | 445. 984 | 19236564. 67 |
| M112T328   | 112. 0753227 | 328. 106 | 24031259. 11 |
| M112T394   | 112. 0753297 | 393. 934 | 18345154     |
| M112T185   | 112. 0862029 | 185. 398 | 36487385. 43 |
| M112T283   | 112. 0859082 | 282. 886 | 29125892. 75 |
| M112T246   | 112. 0867583 | 246. 372 | 1198737293   |
| M112T108   | 112. 0861591 | 107. 537 | 577069224. 3 |
| M112T143_2 | 112. 0855104 | 142. 85  | 160182907. 9 |
| M112T209   | 112. 0867346 | 208. 905 | 253220077. 1 |
| M112T124   | 112. 0862199 | 124. 487 | 178923422. 1 |
| M112T222   | 112. 085784  | 222. 017 | 62000641. 85 |

|            |              |          |              |
|------------|--------------|----------|--------------|
| M112T68    | 112. 1116404 | 68. 0903 | 4673385. 397 |
| M112T49    | 112. 1197442 | 48. 7362 | 3947749. 349 |
| M112T156   | 112. 119851  | 156. 393 | 1112428. 521 |
| M112T245   | 112. 1254003 | 245. 199 | 1102030. 565 |
| M113T788   | 112. 5162041 | 787. 856 | 34090030. 25 |
| M113T838   | 112. 5165794 | 837. 524 | 6557408. 434 |
| M113T821_1 | 112. 5165968 | 821. 334 | 16267501. 39 |
| M113T772   | 112. 5168251 | 772. 206 | 15085762. 16 |
| M113T33    | 112. 5188765 | 33. 467  | 18355089. 15 |
| M113T237   | 112. 5384577 | 237. 171 | 3838153. 351 |
| M113T201   | 112. 5785148 | 200. 766 | 3998196. 023 |
| M113T222   | 112. 5881503 | 222. 017 | 2270121. 493 |
| M113T81    | 112. 8952763 | 80. 824  | 13141786. 8  |
| M113T45    | 112. 9663297 | 45. 3435 | 7428804. 297 |
| M113T51    | 112. 9663334 | 51. 1942 | 4491557. 636 |
| M113T59    | 112. 9663156 | 58. 6151 | 3594630. 162 |
| M113T31    | 112. 9669578 | 31. 4047 | 18829863     |
| M113T75    | 112. 9663585 | 74. 9588 | 27599689. 16 |
| M113T206_1 | 112. 9951854 | 205. 903 | 1715609. 938 |
| M113T829   | 113. 0158925 | 828. 73  | 98811790. 21 |
| M113T794   | 113. 0160025 | 793. 649 | 100533503. 3 |
| M113T806   | 113. 0160273 | 805. 823 | 125897938. 8 |
| M113T768   | 113. 0172519 | 768. 166 | 166175189. 9 |
| M113T737   | 113. 0160546 | 737. 198 | 193441832. 1 |
| M113T783   | 113. 0160918 | 782. 558 | 57337941. 8  |
| M113T38    | 113. 0222602 | 38. 3208 | 149818091. 3 |
| M113T309   | 113. 0230385 | 308. 967 | 62204098. 69 |
| M113T96    | 113. 0228128 | 95. 7572 | 170852279. 5 |
| M113T266   | 113. 0220933 | 265. 624 | 146196416    |
| M113T579   | 113. 0339885 | 578. 816 | 45823398. 22 |
| M113T369   | 113. 0339764 | 369. 321 | 52965873. 43 |
| M113T557   | 113. 033935  | 556. 816 | 39192246. 39 |
| M113T206_2 | 113. 0345443 | 205. 903 | 1046215706   |
| M113T435   | 113. 0340503 | 434. 589 | 42007272. 04 |
| M113T159   | 113. 0338445 | 159. 017 | 121637540. 1 |
| M113T144   | 113. 0338633 | 143. 959 | 186362596. 1 |
| M113T348   | 113. 0339876 | 348. 488 | 40621473. 37 |
| M113T810   | 113. 0339392 | 810. 052 | 34112106. 32 |
| M113T605   | 113. 033955  | 605. 264 | 41742633. 82 |
| M113T181   | 113. 0338992 | 181. 154 | 69877123. 05 |
| M113T462   | 113. 0340259 | 461. 845 | 98685844. 5  |
| M113T660   | 113. 0339259 | 660. 455 | 48440550. 86 |
| M113T167   | 113. 0338844 | 166. 613 | 53624133. 23 |
| M113T398   | 113. 0340229 | 397. 878 | 60009645. 28 |
| M113T419   | 113. 0340265 | 418. 97  | 50974633. 48 |
| M113T642   | 113. 0339555 | 642. 211 | 36164040. 28 |
| M113T286   | 113. 0339104 | 285. 9   | 85356352. 19 |
| M113T623   | 113. 0339857 | 623. 11  | 47972123. 4  |
| M113T491   | 113. 0340224 | 491. 373 | 38257153. 81 |
| M113T188   | 113. 0339192 | 188. 126 | 119191918. 6 |
| M113T676   | 113. 0339013 | 675. 866 | 129125210. 2 |
| M113T446   | 113. 0340125 | 445. 984 | 44289120. 01 |
| M113T834   | 113. 0338716 | 834. 486 | 52411369. 8  |
| M113T533   | 113. 0339664 | 532. 526 | 46576798. 81 |

|            |              |          |              |
|------------|--------------|----------|--------------|
| M113T706   | 113. 0338952 | 706. 229 | 46903617. 52 |
| M113T547   | 113. 0339172 | 546. 651 | 47656314. 2  |
| M113T484   | 113. 0340374 | 483. 973 | 32272627. 48 |
| M113T341   | 113. 0340153 | 340. 548 | 48924387     |
| M113T331   | 113. 0338555 | 330. 809 | 59347882. 63 |
| M113T635   | 113. 0339228 | 635. 022 | 37672614. 3  |
| M113T512   | 113. 0339661 | 511. 77  | 41115683. 15 |
| M113T131   | 113. 0345934 | 130. 668 | 159381414. 4 |
| M113T716   | 113. 0339027 | 716. 403 | 43777012. 42 |
| M113T382   | 113. 0340181 | 382. 125 | 50472989. 66 |
| M113T652   | 113. 0338688 | 651. 956 | 34988380. 31 |
| M113T298   | 113. 0339637 | 298. 135 | 83043973. 02 |
| M113T236   | 113. 0339005 | 235. 734 | 232119863. 5 |
| M113T358   | 113. 0339526 | 357. 958 | 53158471. 32 |
| M113T595   | 113. 033937  | 595. 066 | 62063104. 54 |
| M113T802   | 113. 0339122 | 801. 685 | 39039431. 79 |
| M113T821_2 | 113. 0338837 | 821. 334 | 42391154. 23 |
| M113T276   | 113. 0338709 | 276. 414 | 63631579. 21 |
| M113T502   | 113. 0340217 | 501. 549 | 46398335. 5  |
| M113T761   | 113. 0345626 | 760. 916 | 183965540. 3 |
| M113T567   | 113. 0338889 | 567. 1   | 43526059. 39 |
| M113T308   | 113. 0339776 | 307. 735 | 48389442. 43 |
| M113T267   | 113. 0338605 | 267. 171 | 106398516. 1 |
| M113T792   | 113. 0339586 | 792. 146 | 40444590. 88 |
| M113T254   | 113. 0339158 | 254. 446 | 66752292. 65 |
| M113T177   | 113. 0592174 | 177. 295 | 39412100. 23 |
| M113T425   | 113. 059069  | 424. 572 | 24458609. 07 |
| M113T359   | 113. 0588325 | 359. 32  | 14701409. 77 |
| M113T784   | 113. 0592475 | 783. 78  | 106963710. 8 |
| M113T335   | 113. 0703329 | 334. 966 | 18888274. 34 |
| M113T232   | 113. 070462  | 231. 773 | 70067812. 03 |
| M113T92    | 113. 0704165 | 91. 7174 | 214294503. 6 |
| M113T206_3 | 113. 0736261 | 205. 903 | 762492. 8146 |
| M113T246   | 113. 0896503 | 246. 372 | 62492236. 75 |
| M113T108   | 113. 089796  | 107. 537 | 22679347. 32 |
| M114T78    | 113. 9637308 | 78. 3841 | 77511361. 22 |
| M114T137   | 113. 9633539 | 137. 373 | 67860368     |
| M114T31    | 113. 9632453 | 31. 4047 | 109402376. 4 |
| M114T171   | 113. 963188  | 170. 665 | 31672774. 51 |
| M114T87    | 113. 962871  | 86. 6643 | 9145914. 225 |
| M114T70    | 113. 9632297 | 70. 3428 | 148067585. 1 |
| M114T148   | 113. 9632101 | 148. 117 | 65438073. 6  |
| M114T45    | 113. 9631964 | 45. 3435 | 247643806. 5 |
| M114T748   | 114. 0156223 | 748. 486 | 17190899. 81 |
| M114T830_1 | 114. 0158669 | 830. 193 | 13190180. 36 |
| M114T804   | 114. 0158806 | 804. 327 | 30804822. 36 |
| M114T771   | 114. 0156253 | 771. 042 | 21796635. 81 |
| M114T731   | 114. 0154932 | 731. 347 | 16545208. 13 |
| M114T760   | 114. 0156136 | 759. 605 | 26073112. 71 |
| M114T784   | 114. 0159034 | 783. 78  | 41809066. 15 |
| M114T821_1 | 114. 0159172 | 821. 334 | 18478137. 31 |
| M114T38    | 114. 0255338 | 38. 3208 | 11885360. 61 |
| M114T309   | 114. 0263689 | 308. 967 | 2210345. 234 |
| M114T62_1  | 114. 025454  | 62. 1777 | 5915597. 446 |

|            |              |          |              |
|------------|--------------|----------|--------------|
| M114T68    | 114. 0375068 | 68. 0903 | 2202792. 168 |
| M114T206   | 114. 0374118 | 205. 903 | 40904947. 48 |
| M114T144   | 114. 0374207 | 143. 959 | 6873507. 4   |
| M114T55    | 114. 0375292 | 54. 867  | 2601546. 377 |
| M114T39    | 114. 0375085 | 39. 4128 | 2291046. 011 |
| M114T106   | 114. 0545719 | 105. 503 | 124370061. 2 |
| M114T92    | 114. 0545557 | 91. 7174 | 208389382. 3 |
| M114T178   | 114. 0544814 | 178. 408 | 117418380. 3 |
| M114T69    | 114. 0632226 | 69. 2834 | 498973. 5763 |
| M114T62_2  | 114. 0632163 | 62. 1777 | 604797. 8882 |
| M114T52    | 114. 0632137 | 52. 4521 | 1064455. 834 |
| M114T104   | 114. 0658083 | 104. 493 | 7670196. 281 |
| M114T91    | 114. 0738468 | 90. 7088 | 10607693. 31 |
| M114T694   | 114. 0907367 | 693. 81  | 112846021. 4 |
| M114T699   | 114. 0907461 | 699. 389 | 115883190. 7 |
| M114T628   | 114. 0906773 | 627. 58  | 115675371. 9 |
| M114T633   | 114. 0906919 | 633. 476 | 97723179. 76 |
| M114T456   | 114. 0905129 | 456. 126 | 49402516. 31 |
| M114T662   | 114. 0906758 | 661. 979 | 147741340. 7 |
| M114T791   | 114. 0907309 | 790. 802 | 144684951. 6 |
| M114T435   | 114. 091674  | 434. 589 | 141363586. 5 |
| M114T830_2 | 114. 0906982 | 830. 193 | 107246344. 5 |
| M114T644   | 114. 0906821 | 643. 727 | 150119663. 5 |
| M114T475   | 114. 0905443 | 475. 007 | 58341160. 67 |
| M114T604   | 114. 0906898 | 603. 95  | 215718938. 5 |
| M114T535   | 114. 0905363 | 535. 329 | 124842861. 9 |
| M114T524   | 114. 0905301 | 523. 735 | 46212271. 67 |
| M114T676   | 114. 0905239 | 675. 866 | 161293344. 8 |
| M114T807   | 114. 0905245 | 807. 232 | 119878449. 6 |
| M114T838   | 114. 0906806 | 837. 524 | 62738230. 84 |
| M114T620   | 114. 0906778 | 620. 172 | 132866956    |
| M114T683   | 114. 0906711 | 683. 436 | 77982750. 57 |
| M114T515   | 114. 0905276 | 514. 727 | 50666867. 11 |
| M114T577   | 114. 0905313 | 577. 366 | 308022076. 2 |
| M114T611   | 114. 0906963 | 611. 145 | 107902913. 9 |
| M114T507   | 114. 0905353 | 507. 343 | 40912805. 42 |
| M114T765   | 114. 0905296 | 765. 406 | 348935217. 3 |
| M114T736   | 114. 0906758 | 735. 7   | 251652571. 2 |
| M114T491   | 114. 0905186 | 491. 373 | 85061722. 22 |
| M114T653   | 114. 091559  | 653. 147 | 103707612. 6 |
| M114T466   | 114. 0905388 | 466. 162 | 55470836. 03 |
| M114T551   | 114. 0905242 | 550. 919 | 107421105    |
| M114T423   | 114. 0905752 | 423. 199 | 103489433. 3 |
| M114T715   | 114. 0906659 | 715. 011 | 284988422    |
| M114T821_2 | 114. 0907567 | 821. 334 | 104293111    |
| M114T406   | 114. 0916616 | 406. 289 | 160926620    |
| M114T253   | 114. 1021096 | 253. 024 | 77147213. 06 |
| M114T77    | 114. 1020981 | 77. 2391 | 201023005. 9 |
| M114T216   | 114. 1020929 | 216. 359 | 47872182. 54 |
| M115T725   | 114. 5579759 | 725. 212 | 26083125. 37 |
| M115T794   | 114. 5579264 | 793. 649 | 15869812. 58 |
| M115T713   | 114. 5579352 | 713. 464 | 23721315. 34 |
| M115T772   | 114. 5579969 | 772. 206 | 21579080. 35 |
| M115T783   | 114. 5579832 | 782. 558 | 19509277. 65 |

|            |              |          |              |
|------------|--------------|----------|--------------|
| M115T68    | 114. 9705314 | 68. 0903 | 2734700. 916 |
| M115T62    | 114. 9705579 | 62. 1777 | 2816410. 564 |
| M115T55    | 114. 970515  | 54. 867  | 2883370. 565 |
| M115T49    | 114. 970561  | 48. 7362 | 2989484. 669 |
| M115T33    | 115. 0153035 | 33. 467  | 2187559. 57  |
| M115T59    | 115. 0278291 | 58. 6151 | 1723987. 689 |
| M115T629   | 115. 0337498 | 629. 015 | 871420. 1471 |
| M115T158   | 115. 0389185 | 157. 773 | 93331217. 14 |
| M115T293_1 | 115. 038459  | 292. 623 | 117839419. 6 |
| M115T180   | 115. 0382    | 179. 75  | 79244806. 29 |
| M115T207   | 115. 0389223 | 207. 393 | 100754640    |
| M115T86    | 115. 0383191 | 85. 6453 | 28581966. 62 |
| M115T143   | 115. 038965  | 142. 85  | 141869562. 2 |
| M115T323   | 115. 0387604 | 322. 536 | 131637688. 7 |
| M115T77_1  | 115. 038316  | 77. 2391 | 31278243. 45 |
| M115T94    | 115. 0383637 | 93. 7378 | 137303898. 3 |
| M115T545   | 115. 0383802 | 545. 203 | 35106591. 78 |
| M115T104   | 115. 0388719 | 104. 493 | 300829338. 2 |
| M115T187   | 115. 049883  | 186. 709 | 8134810. 649 |
| M115T38    | 115. 0498296 | 38. 3208 | 5129108. 809 |
| M115T173   | 115. 049919  | 173. 407 | 12100693. 21 |
| M115T241   | 115. 0460575 | 241. 368 | 24536614. 17 |
| M115T52    | 115. 0498545 | 52. 4521 | 5067649. 528 |
| M115T66_1  | 115. 0498455 | 65. 7101 | 5873098. 943 |
| M115T145_1 | 115. 0500748 | 145. 382 | 20400607. 66 |
| M115T88    | 115. 0496359 | 87. 6739 | 11872222. 31 |
| M115T223   | 115. 074175  | 223. 474 | 27857026. 53 |
| M115T554   | 115. 0737594 | 553. 936 | 2709635. 155 |
| M115T250   | 115. 0742274 | 250. 144 | 12048833. 75 |
| M115T145_2 | 115. 0744346 | 145. 382 | 23056991. 97 |
| M115T169   | 115. 0744476 | 169. 221 | 10648922. 68 |
| M115T258   | 115. 0743686 | 258. 489 | 7471418. 617 |
| M115T268   | 115. 0741749 | 268. 427 | 10397718. 97 |
| M115T240   | 115. 0742626 | 239. 913 | 10144038. 58 |
| M115T276   | 115. 0743415 | 276. 414 | 42691256. 15 |
| M115T379_1 | 115. 0744379 | 379. 194 | 8549495. 996 |
| M115T202   | 115. 0861369 | 202. 149 | 28064264. 58 |
| M115T367   | 115. 0862386 | 366. 514 | 5860493. 916 |
| M115T93    | 115. 0859653 | 92. 7272 | 450633430. 8 |
| M115T379_2 | 115. 0862263 | 379. 194 | 4318691. 259 |
| M115T435   | 115. 0943282 | 434. 589 | 8632315. 788 |
| M115T644   | 115. 0943166 | 643. 727 | 10818282. 86 |
| M115T572   | 115. 0943019 | 571. 523 | 10595532. 43 |
| M115T672   | 115. 0943623 | 671. 649 | 8457191. 957 |
| M115T685   | 115. 0943396 | 684. 985 | 12134576. 45 |
| M115T655   | 115. 0943529 | 654. 542 | 8744886. 736 |
| M115T697   | 115. 0943548 | 696. 575 | 7377866. 657 |
| M115T54    | 115. 094428  | 53. 6731 | 21769658. 27 |
| M115T101   | 115. 1111729 | 101. 161 | 52793657. 22 |
| M115T293_2 | 115. 1111999 | 292. 623 | 104871591. 3 |
| M115T271   | 115. 1111032 | 270. 983 | 81419682. 9  |
| M115T31    | 115. 1114786 | 31. 4047 | 17316605. 09 |
| M115T77_2  | 115. 1114679 | 77. 2391 | 47829873. 54 |
| M115T239   | 115. 111196  | 238. 605 | 96676283. 27 |

|           |              |          |              |
|-----------|--------------|----------|--------------|
| M115T89   | 115. 1111542 | 88. 6838 | 39724467. 99 |
| M115T198  | 115. 1111927 | 198. 072 | 81524446. 5  |
| M115T66_2 | 115. 1110732 | 65. 7101 | 107912285. 8 |
| M115T261  | 115. 1110548 | 261. 177 | 106513529. 1 |
| M115T148  | 115. 1111375 | 148. 117 | 125083216. 8 |
| M115T44   | 115. 1111905 | 44. 1485 | 66564263. 66 |
| M116T274  | 115. 5287151 | 273. 531 | 392066. 6925 |
| M116T241  | 115. 5480356 | 241. 368 | 1558170. 141 |
| M116T673  | 115. 5567171 | 672. 956 | 1890619. 826 |
| M116T31   | 115. 9637436 | 31. 4047 | 7473940. 348 |
| M116T69   | 115. 968909  | 69. 2834 | 2403569. 282 |
| M116T62   | 115. 9693811 | 62. 1777 | 2213929. 199 |
| M116T52   | 115. 9693886 | 52. 4521 | 3622979. 592 |
| M116T42   | 116. 0014843 | 41. 798  | 53187321. 05 |
| M116T87   | 116. 0338406 | 86. 6643 | 210332445. 2 |
| M116T148  | 116. 0338187 | 148. 117 | 151903242. 7 |
| M116T38   | 116. 041941  | 38. 3208 | 2300942. 927 |
| M116T57   | 116. 0419351 | 57. 4179 | 3586115. 311 |
| M116T46   | 116. 0419334 | 46. 447  | 2670629. 685 |
| M116T321  | 116. 0420011 | 321. 198 | 6392843. 227 |
| M116T67   | 116. 0419077 | 66. 9841 | 2344330. 647 |
| M116T456  | 116. 0706541 | 456. 126 | 33553939. 95 |
| M116T540  | 116. 0707311 | 539. 764 | 36082790. 26 |
| M116T311  | 116. 0700099 | 311. 445 | 111818390. 9 |
| M116T809  | 116. 0694783 | 808. 678 | 35830834. 03 |
| M116T746  | 116. 0699431 | 745. 603 | 54891736. 95 |
| M116T582  | 116. 0706809 | 581. 625 | 156528367. 3 |
| M116T401  | 116. 0699695 | 400. 59  | 41392094. 45 |
| M116T78   | 116. 0701309 | 78. 3841 | 212952950. 3 |
| M116T706  | 116. 0698897 | 706. 229 | 32413389. 08 |
| M116T794  | 116. 0699156 | 793. 649 | 37270670. 54 |
| M116T692  | 116. 0699125 | 692. 461 | 32694925. 01 |
| M116T205  | 116. 0699626 | 204. 747 | 68266850. 36 |
| M116T86   | 116. 0700644 | 85. 6453 | 215220929. 7 |
| M116T158  | 116. 070705  | 157. 773 | 459665864. 8 |
| M116T558  | 116. 0706297 | 557. 967 | 38818019. 41 |
| M116T547  | 116. 069909  | 546. 651 | 27454973. 03 |
| M116T394  | 116. 0699849 | 393. 934 | 26389385. 91 |
| M116T225  | 116. 069928  | 224. 729 | 63969819. 68 |
| M116T764  | 116. 0699238 | 763. 856 | 72820321. 34 |
| M116T699  | 116. 0707145 | 699. 389 | 26152855. 82 |
| M116T430  | 116. 070628  | 430. 131 | 42274207. 88 |
| M116T660  | 116. 0706995 | 660. 455 | 59938133. 76 |
| M116T98_1 | 116. 0707548 | 97. 7824 | 10052609776  |
| M116T670  | 116. 0699466 | 670. 166 | 35762578. 75 |
| M116T647  | 116. 0699237 | 646. 794 | 38436123. 35 |
| M116T685  | 116. 0706507 | 684. 985 | 40852987. 2  |
| M116T335  | 116. 0707031 | 334. 966 | 49640088. 6  |
| M116T267  | 116. 069912  | 267. 171 | 41376530. 66 |
| M116T243  | 116. 0706681 | 242. 682 | 57440562. 71 |
| M116T724  | 116. 0707352 | 723. 682 | 46230839. 6  |
| M116T833  | 116. 0699855 | 833. 029 | 36726958. 21 |
| M116T418  | 116. 0707265 | 417. 676 | 72463002. 11 |
| M116T620  | 116. 0707438 | 620. 172 | 36544258. 34 |

|            |              |          |              |
|------------|--------------|----------|--------------|
| M116T677   | 116. 0706702 | 677. 376 | 28198805. 11 |
| M116T446   | 116. 0706986 | 445. 984 | 56385478. 7  |
| M116T275   | 116. 0706859 | 274. 968 | 34535605. 26 |
| M116T515   | 116. 0706409 | 514. 727 | 54056556. 73 |
| M116T713   | 116. 0707318 | 713. 464 | 41210887. 07 |
| M116T504   | 116. 0706892 | 504. 466 | 40970053. 1  |
| M116T737   | 116. 0699425 | 737. 198 | 44618275. 43 |
| M116T482   | 116. 0707107 | 482. 436 | 37853756. 56 |
| M116T257   | 116. 0694579 | 257. 155 | 47796403. 58 |
| M116T530_1 | 116. 0706769 | 529. 713 | 43881158. 04 |
| M116T632   | 116. 0699338 | 631. 982 | 53002380. 71 |
| M116T611   | 116. 0699717 | 611. 145 | 41779427. 6  |
| M116T466   | 116. 0706297 | 466. 162 | 36812119. 01 |
| M116T298   | 116. 0699418 | 298. 135 | 54910584. 66 |
| M116T216   | 116. 0707137 | 216. 359 | 47960476. 34 |
| M116T188   | 116. 0699147 | 188. 126 | 90704172. 22 |
| M116T365   | 116. 0706678 | 365. 061 | 100952058. 1 |
| M116T32    | 116. 1066632 | 32. 4171 | 3499474. 577 |
| M116T530_2 | 116. 106621  | 529. 713 | 16669293. 16 |
| M116T98_2  | 116. 1121524 | 97. 7824 | 7351482. 333 |
| M116T355   | 116. 1179051 | 355. 41  | 4067508. 607 |
| M117T122   | 116. 5097175 | 122. 007 | 27576496. 94 |
| M117T136   | 116. 5097677 | 135. 971 | 7028477. 693 |
| M117T113   | 116. 5097259 | 112. 781 | 19443067. 66 |
| M117T809   | 116. 5231756 | 808. 678 | 18981443. 95 |
| M117T36    | 116. 5236943 | 35. 8675 | 7261005. 503 |
| M117T758   | 116. 523672  | 758. 236 | 108802303. 5 |
| M117T821   | 116. 523279  | 821. 334 | 7293221. 734 |
| M117T781   | 116. 5231289 | 781. 303 | 27811917. 84 |
| M117T792   | 116. 5231647 | 792. 146 | 32307320. 93 |
| M117T137   | 116. 9658601 | 137. 373 | 17288877. 73 |
| M117T62    | 116. 9657875 | 62. 1777 | 90523738. 75 |
| M117T116   | 117. 0112082 | 115. 522 | 1017064. 136 |
| M117T33    | 117. 0274581 | 33. 467  | 10911548. 84 |
| M117T148   | 117. 0371863 | 148. 117 | 5378847. 935 |
| M117T147   | 117. 0541347 | 146. 742 | 380891098. 3 |
| M117T199   | 117. 0542434 | 199. 43  | 90925880. 64 |
| M117T96    | 117. 0534469 | 95. 7572 | 523722973    |
| M117T342   | 117. 0539613 | 341. 802 | 23090697. 34 |
| M117T66    | 117. 0541746 | 65. 7101 | 87062709. 37 |
| M117T562   | 117. 0693817 | 561. 955 | 4843889. 85  |
| M117T777   | 117. 0694522 | 777. 245 | 34827257. 21 |
| M117T311   | 117. 0736473 | 311. 445 | 5302062. 278 |
| M117T98    | 117. 073548  | 97. 7824 | 482215521. 4 |
| M117T43    | 117. 0733798 | 43. 0471 | 1770539. 421 |
| M117T438   | 117. 1018946 | 437. 571 | 2183521. 45  |
| M117T31    | 117. 1384496 | 31. 4047 | 6613803. 92  |
| M118T211   | 117. 5174169 | 211. 288 | 6149465. 23  |
| M118T36    | 117. 934068  | 35. 8675 | 2586442. 395 |
| M118T55    | 117. 9340293 | 54. 867  | 4638602. 622 |
| M118T67    | 117. 9341342 | 66. 9841 | 2776414. 007 |
| M118T45    | 117. 934076  | 45. 3435 | 4420208. 526 |
| M118T69    | 117. 9593106 | 69. 2834 | 2992140. 917 |
| M118T35    | 117. 9592973 | 34. 5397 | 14509056. 15 |



|            |             |         |             |
|------------|-------------|---------|-------------|
| M118T61    | 118.0345864 | 61.1538 | 4608949.872 |
| M118T51    | 118.0346083 | 51.1942 | 3021028.481 |
| M118T44    | 118.0346542 | 44.1485 | 1897165.398 |
| M118T75    | 118.0345067 | 74.9588 | 607773843.1 |
| M118T38    | 118.0468409 | 38.3208 | 5704860.359 |
| M118T66    | 118.0492354 | 65.7101 | 6486361.73  |
| M118T101   | 118.0575881 | 101.161 | 7031229.811 |
| M118T96    | 118.0574774 | 95.7572 | 10823491.42 |
| M118T791_1 | 118.0650624 | 790.802 | 7870219.277 |
| M118T605   | 118.0650982 | 605.264 | 6314917.761 |
| M118T669   | 118.0651501 | 668.867 | 7931738.65  |
| M118T649   | 118.0641118 | 649.338 | 14205552.49 |
| M118T660_1 | 118.0652065 | 660.455 | 7098490.706 |
| M118T682   | 118.0651658 | 681.885 | 9431273.213 |
| M118T584   | 118.0652463 | 584.417 | 6986683.776 |
| M118T345_1 | 118.0646828 | 344.555 | 13415078.07 |
| M118T544   | 118.0642092 | 544.056 | 16839631.33 |
| M118T562   | 118.0640954 | 561.955 | 35627346.18 |
| M118T718   | 118.0649744 | 717.959 | 9748614.48  |
| M118T703   | 118.065156  | 703.35  | 17129979.96 |
| M118T753   | 118.065009  | 752.541 | 6729749.467 |
| M118T216   | 118.0646443 | 216.359 | 3359070.767 |
| M118T800   | 118.0646301 | 800.484 | 10652352.48 |
| M118T402   | 118.0645996 | 401.963 | 16564886.14 |
| M118T668   | 118.0860784 | 667.609 | 26893871.36 |
| M118T791_2 | 118.0851648 | 790.802 | 42187998.46 |
| M118T809   | 118.0861209 | 808.678 | 101794323.4 |
| M118T660_2 | 118.08608   | 660.455 | 38417311.66 |
| M118T229   | 118.0862196 | 229.059 | 44100224.94 |
| M118T158   | 118.0861157 | 157.773 | 143897994.4 |
| M118T644   | 118.0851304 | 643.727 | 47253443.72 |
| M118T474   | 118.0851338 | 473.597 | 29573434.44 |
| M118T408   | 118.0862927 | 407.724 | 34410133.9  |
| M118T180   | 118.0862658 | 179.75  | 55858367.43 |
| M118T430   | 118.0862166 | 430.131 | 52911752.99 |
| M118T674   | 118.0860959 | 674.402 | 41751572.83 |
| M118T401   | 118.0861615 | 400.59  | 29491512.2  |
| M118T167   | 118.0851681 | 166.613 | 77091633.15 |
| M118T448   | 118.0862086 | 447.531 | 24953641.1  |
| M118T440   | 118.0862213 | 440.459 | 33662678.68 |
| M118T282   | 118.0851599 | 281.666 | 83002884.06 |
| M118T243   | 118.0851453 | 242.682 | 38163738.39 |
| M118T734   | 118.0861048 | 734.269 | 40618502.78 |
| M118T345_2 | 118.085239  | 344.555 | 84616840.05 |
| M118T741   | 118.0851616 | 741.302 | 38135367.69 |
| M118T455   | 118.086088  | 454.739 | 40205124.18 |
| M118T418   | 118.0862205 | 417.676 | 39932536.87 |
| M118T653   | 118.0861309 | 653.147 | 26121741.25 |
| M118T139   | 118.0863537 | 138.766 | 1046687354  |
| M118T506   | 118.0862386 | 505.855 | 163454707.4 |
| M118T712   | 118.0862235 | 711.984 | 40424360.84 |
| M118T631   | 118.0862329 | 630.507 | 51083110.76 |
| M118T110   | 118.0862002 | 110.047 | 2777971835  |
| M118T466   | 118.0851465 | 466.162 | 38829303.9  |

|            |             |         |             |
|------------|-------------|---------|-------------|
| M118T123   | 118.086166  | 123.262 | 1569171723  |
| M118T771   | 118.0861589 | 771.042 | 34303646.54 |
| M118T197   | 118.0861171 | 196.644 | 46611236.26 |
| M118T607   | 118.0860916 | 606.774 | 117301545.1 |
| M118T218   | 118.0862242 | 217.866 | 57794502.49 |
| M118T568   | 118.0862374 | 568.464 | 57464627.7  |
| M118T586   | 118.0861069 | 585.968 | 37733357.36 |
| M118T695   | 118.0861199 | 695.155 | 81140024.06 |
| M118T760   | 118.0852    | 759.605 | 72758378.95 |
| M118T188   | 118.0862572 | 188.126 | 41441185.88 |
| M118T545   | 118.0861195 | 545.203 | 103328409.8 |
| M118T92    | 118.0853066 | 91.7174 | 2950490801  |
| M118T316   | 118.0862183 | 315.701 | 35306761.88 |
| M118T299   | 118.0860941 | 299.493 | 45564558.56 |
| M118T268   | 118.0862543 | 268.427 | 49117056.97 |
| M118T365   | 118.0862553 | 365.061 | 54006048.13 |
| M118T256   | 118.0850535 | 255.723 | 55614279.56 |
| M118T209   | 118.0862292 | 208.905 | 62472646.49 |
| M118T781   | 118.0860898 | 781.303 | 34528663.13 |
| M118T722   | 118.0862306 | 722.193 | 52359621.61 |
| M119T183   | 118.9421007 | 182.574 | 1069655.137 |
| M119T203   | 118.9420641 | 203.36  | 4106867.994 |
| M119T271   | 118.9420961 | 270.983 | 17471734.42 |
| M119T69    | 118.9421628 | 69.2834 | 11402552.29 |
| M119T191   | 118.9420513 | 190.962 | 2254717.177 |
| M119T237   | 118.9421372 | 237.171 | 18378744.92 |
| M119T56    | 118.9627056 | 56.1096 | 2138773.983 |
| M119T50    | 118.9626595 | 50.041  | 998686.9005 |
| M119T68_1  | 118.9626002 | 68.0903 | 1812683.36  |
| M119T46    | 118.9834261 | 46.447  | 1218165.006 |
| M119T62    | 118.9834864 | 62.1777 | 2672689.536 |
| M119T809   | 119.0132003 | 808.678 | 5193510.226 |
| M119T794   | 119.0132244 | 793.649 | 8716446.34  |
| M119T821   | 119.0132053 | 821.334 | 7107818.345 |
| M119T211_1 | 119.0158274 | 211.288 | 49414294.33 |
| M119T290   | 119.0345376 | 289.912 | 1777292.483 |
| M119T211_2 | 119.033427  | 211.288 | 5600190.973 |
| M119T75    | 119.0356639 | 74.9588 | 77302459.37 |
| M119T218   | 119.0487692 | 217.866 | 29309495.51 |
| M119T210   | 119.0601103 | 210.186 | 2595506.066 |
| M119T343   | 119.0713619 | 343.226 | 1193108.454 |
| M119T405   | 119.0720336 | 404.872 | 10361713.22 |
| M119T788   | 119.0844962 | 787.856 | 12290974.62 |
| M119T669   | 119.0845482 | 668.867 | 16220168.48 |
| M119T649   | 119.0846985 | 649.338 | 26599379.71 |
| M119T31    | 119.0850497 | 31.4047 | 1466842.835 |
| M119T682   | 119.0846292 | 681.885 | 13359337.47 |
| M119T68_2  | 119.0851143 | 68.0903 | 1372706.42  |
| M119T562   | 119.0845866 | 561.955 | 87631782.82 |
| M119T718   | 119.0845056 | 717.959 | 11857391.08 |
| M119T607   | 119.0852838 | 606.774 | 7164920.663 |
| M119T740   | 119.0852379 | 740.014 | 6241591.135 |
| M119T703   | 119.0845093 | 703.35  | 30102138.33 |
| M119T753   | 119.0847134 | 752.541 | 7177296.492 |

|          |             |         |             |
|----------|-------------|---------|-------------|
| M119T545 | 119.0843861 | 545.203 | 29840460.26 |
| M119T694 | 119.0845176 | 693.81  | 12728825.02 |
| M119T576 | 119.084685  | 575.878 | 7871294.217 |
| M119T802 | 119.0850583 | 801.685 | 10311469.37 |
| M119T772 | 119.0847414 | 772.206 | 5794683.271 |
| M119T44  | 119.0851506 | 44.1485 | 8094891.163 |
| M119T122 | 119.0893989 | 122.007 | 76974474.25 |
| M119T139 | 119.0893382 | 138.766 | 50127975.22 |
| M119T110 | 119.0894384 | 110.047 | 135572982.6 |
| M119T92  | 119.0891685 | 91.7174 | 138506195.4 |
| M120T137 | 120.0239479 | 137.373 | 10986418.27 |
| M120T46  | 120.0232331 | 46.447  | 59669884.8  |
| M120T211 | 120.0222492 | 211.288 | 33029523.91 |
| M120T765 | 120.0257286 | 765.406 | 19653292.64 |
| M120T795 | 120.025634  | 795.165 | 88570356.6  |
| M120T772 | 120.0257051 | 772.206 | 25653267.54 |
| M120T75  | 120.0321245 | 74.9588 | 89943124.29 |
| M120T834 | 120.0256656 | 834.486 | 21621296.8  |
| M120T706 | 120.0252265 | 706.229 | 10002629.46 |
| M120T719 | 120.0252246 | 719.215 | 12456690    |
| M120T821 | 120.0252049 | 821.334 | 33715948.78 |
| M120T37  | 120.0442226 | 37.1891 | 4837902.6   |
| M120T48  | 120.0442025 | 47.6391 | 1722523.268 |
| M120T756 | 120.0439318 | 755.537 | 3218794.998 |
| M120T70  | 120.0441464 | 70.3428 | 4198430.598 |
| M120T218 | 120.051945  | 217.866 | 2002384.727 |
| M120T101 | 120.0651138 | 101.161 | 25746257.44 |
| M120T159 | 120.0650901 | 159.017 | 5521403.051 |
| M120T139 | 120.0651075 | 138.766 | 7235842.872 |
| M120T172 | 120.0650455 | 171.935 | 1663476.3   |
| M120T89  | 120.0651493 | 88.6838 | 1091794208  |
| M120T148 | 120.0650609 | 148.117 | 4393034.351 |
| M120T496 | 120.0803452 | 495.779 | 6862464.316 |
| M120T534 | 120.0804093 | 533.958 | 14003737.14 |
| M120T345 | 120.0806603 | 344.555 | 1109535697  |
| M120T279 | 120.0800194 | 279.039 | 7093177.176 |
| M120T151 | 120.0798379 | 151.016 | 6809844.704 |
| M120T365 | 120.0806845 | 365.061 | 18434121.03 |
| M120T104 | 120.0797241 | 104.493 | 10815809.54 |
| M120T649 | 120.0885196 | 649.338 | 1691540.811 |
| M120T703 | 120.0884661 | 703.35  | 1826354.999 |
| M120T99  | 120.1015088 | 98.9918 | 9855715.735 |
| M120T91  | 120.1014599 | 90.7088 | 11588857.23 |
| M121T211 | 120.5218756 | 211.288 | 1119938.836 |
| M121T107 | 120.5998357 | 106.513 | 3749372.781 |
| M121T74  | 120.9804238 | 73.8324 | 100794996.9 |
| M121T221 | 120.9804678 | 220.676 | 13522365.32 |
| M121T154 | 120.980368  | 153.785 | 8637620.093 |
| M121T275 | 120.9804307 | 274.968 | 27102495.78 |
| M121T829 | 121.0234073 | 828.73  | 11105222.45 |
| M121T813 | 121.0234248 | 812.862 | 10733198.23 |
| M121T283 | 121.0280198 | 282.886 | 2849732.725 |
| M121T129 | 121.0280569 | 129.234 | 7460165.422 |
| M121T795 | 121.0233202 | 795.165 | 7963137.143 |

|            |              |          |              |
|------------|--------------|----------|--------------|
| M121T820   | 121. 023415  | 819. 78  | 7193051. 591 |
| M121T803   | 121. 0233645 | 802. 88  | 9670580. 899 |
| M121T44    | 121. 0279586 | 44. 1485 | 3234823. 641 |
| M121T367   | 121. 0640974 | 366. 514 | 8769496. 111 |
| M121T510   | 121. 0645298 | 510. 333 | 7603188. 888 |
| M121T218   | 121. 0644615 | 217. 866 | 12707714. 63 |
| M121T543   | 121. 0645523 | 542. 766 | 15721160. 23 |
| M121T245   | 121. 0644177 | 245. 199 | 198354816    |
| M121T89    | 121. 0684201 | 88. 6838 | 43563633. 51 |
| M121T252   | 121. 0755233 | 251. 555 | 1118865. 615 |
| M121T187   | 121. 0918731 | 186. 709 | 1411983. 454 |
| M121T201   | 121. 0919074 | 200. 766 | 13218293. 67 |
| M121T791   | 121. 100793  | 790. 802 | 8123503. 435 |
| M121T669   | 121. 1001576 | 668. 867 | 13675471. 52 |
| M121T649   | 121. 1002246 | 649. 338 | 23935763. 08 |
| M121T702   | 121. 1002063 | 702. 055 | 40927408. 87 |
| M121T503   | 121. 1003338 | 503. 046 | 13834745. 42 |
| M121T544   | 121. 1012742 | 544. 056 | 37904296. 66 |
| M121T562   | 121. 1000312 | 561. 955 | 76750918. 62 |
| M121T772   | 121. 1009063 | 772. 206 | 4793133. 888 |
| M122T266   | 121. 5200308 | 265. 624 | 4311559. 343 |
| M122T59    | 121. 9709269 | 58. 6151 | 1439451. 358 |
| M122T52    | 121. 9708707 | 52. 4521 | 1127839. 656 |
| M122T36    | 121. 9709027 | 35. 8675 | 5572443. 061 |
| M122T67    | 121. 9708847 | 66. 9841 | 1570802. 942 |
| M122T345   | 122. 0602445 | 344. 555 | 39729304. 24 |
| M122T463   | 122. 0601466 | 463. 271 | 21710018. 15 |
| M122T245   | 122. 0677085 | 245. 199 | 13440810. 24 |
| M122T384   | 122. 0961324 | 383. 536 | 47102201. 27 |
| M122T563   | 122. 1038242 | 563. 297 | 4484074. 111 |
| M123T600   | 122. 546798  | 599. 621 | 452090982. 7 |
| M123T579   | 122. 5467811 | 578. 816 | 252320504. 9 |
| M123T413   | 122. 546782  | 413. 295 | 489386629. 5 |
| M123T540   | 122. 5468003 | 539. 764 | 248443998. 9 |
| M123T725   | 122. 5467993 | 725. 212 | 774627864. 6 |
| M123T328   | 122. 5467995 | 328. 106 | 33033615. 66 |
| M123T665   | 122. 5467985 | 664. 745 | 505228222. 2 |
| M123T626   | 122. 5467986 | 626. 042 | 515000693    |
| M123T388   | 122. 546784  | 387. 763 | 81807560. 45 |
| M123T807   | 122. 5467896 | 807. 232 | 281083786. 7 |
| M123T642   | 122. 5468058 | 642. 211 | 520309382. 7 |
| M123T533   | 122. 5468046 | 532. 526 | 205363914. 3 |
| M123T499   | 122. 5467936 | 498. 645 | 423548776    |
| M123T711   | 122. 5468035 | 710. 534 | 793845970. 6 |
| M123T516   | 122. 5467813 | 516. 214 | 297499146. 8 |
| M123T698   | 122. 5467951 | 697. 952 | 490472368. 5 |
| M123T676   | 122. 5468016 | 675. 866 | 649418010. 5 |
| M123T552   | 122. 5467885 | 552. 452 | 324219012. 5 |
| M123T449   | 122. 5467786 | 448. 978 | 192380653. 2 |
| M123T468   | 122. 5467986 | 467. 706 | 285889068. 7 |
| M123T635   | 122. 547147  | 635. 022 | 309232065. 3 |
| M123T690_1 | 122. 5468085 | 689. 5   | 730759803. 4 |
| M123T570   | 122. 546787  | 570. 01  | 343452778. 5 |
| M123T482   | 122. 5467967 | 482. 436 | 188213800. 2 |

|            |              |          |              |
|------------|--------------|----------|--------------|
| M123T611   | 122. 5467964 | 611. 145 | 567245924. 4 |
| M123T655   | 122. 546786  | 654. 542 | 402575119. 5 |
| M123T734   | 122. 5467972 | 734. 269 | 676025968. 8 |
| M123T588   | 122. 5467938 | 587. 521 | 244257681. 5 |
| M123T376   | 122. 5468098 | 376. 409 | 76467570. 63 |
| M123T761   | 122. 5467945 | 760. 916 | 1590344411   |
| M123T826   | 122. 546796  | 825. 74  | 80110107. 8  |
| M123T354   | 122. 5468028 | 353. 978 | 49524840. 78 |
| M123T82_1  | 122. 9238693 | 82. 0569 | 1437420164   |
| M123T82_2  | 122. 9688796 | 82. 0569 | 1987042. 216 |
| M123T74    | 123. 0134459 | 73. 8324 | 196372553. 6 |
| M123T38    | 123. 0397715 | 38. 3208 | 118106732. 4 |
| M123T75    | 123. 0398076 | 74. 9588 | 4747819439   |
| M123T594   | 123. 0406269 | 593. 62  | 75179246. 38 |
| M123T504   | 123. 0441721 | 504. 466 | 28441948. 19 |
| M123T218   | 123. 0443373 | 217. 866 | 78596498. 95 |
| M123T104   | 123. 0437202 | 104. 493 | 46351521. 38 |
| M123T100   | 123. 0548966 | 100. 146 | 21083556     |
| M123T829   | 123. 0485334 | 828. 73  | 5752478. 722 |
| M123T663   | 123. 048598  | 663. 287 | 43196339. 05 |
| M123T788   | 123. 048562  | 787. 856 | 67114565. 43 |
| M123T754   | 123. 0492998 | 753. 987 | 96284846. 95 |
| M123T733   | 123. 0493001 | 732. 773 | 174901826. 9 |
| M123T818   | 123. 0484846 | 818. 418 | 9459976. 852 |
| M123T690_2 | 123. 0486046 | 689. 5   | 158149492. 5 |
| M123T629   | 123. 0492474 | 629. 015 | 186270748. 3 |
| M123T156   | 123. 0549369 | 156. 393 | 604921027. 6 |
| M123T772   | 123. 0485824 | 772. 206 | 37792702. 54 |
| M123T42    | 123. 0799087 | 41. 798  | 7637914. 858 |
| M123T329   | 123. 0912994 | 329. 481 | 2469683. 691 |
| M123T462   | 123. 09145   | 461. 845 | 4947283. 48  |
| M123T106   | 123. 0912936 | 105. 503 | 25523516. 07 |
| M123T216   | 123. 091225  | 216. 359 | 4328132. 996 |
| M123T792_1 | 123. 0911489 | 792. 146 | 8328850. 98  |
| M123T384   | 123. 0994842 | 383. 536 | 3158090. 104 |
| M123T605   | 123. 1169498 | 605. 264 | 12634639. 03 |
| M123T649   | 123. 11698   | 649. 338 | 70119573. 49 |
| M123T682   | 123. 1171282 | 681. 885 | 32536145. 27 |
| M123T670   | 123. 1171416 | 670. 166 | 43222574. 81 |
| M123T562   | 123. 1168635 | 561. 955 | 252176321. 1 |
| M123T718   | 123. 1158129 | 717. 959 | 22353998. 18 |
| M123T777   | 123. 1158354 | 777. 245 | 14910081. 96 |
| M123T740   | 123. 1161262 | 740. 014 | 10918256. 84 |
| M123T703   | 123. 1169516 | 703. 35  | 65046522. 5  |
| M123T768   | 123. 1170493 | 768. 166 | 28107948. 37 |
| M123T545   | 123. 1169478 | 545. 203 | 63254391. 73 |
| M123T396   | 123. 116867  | 396. 415 | 9390718. 66  |
| M123T694   | 123. 1169548 | 693. 81  | 33492717. 43 |
| M123T792_2 | 123. 1161289 | 792. 146 | 13499682. 75 |
| M124T272   | 123. 5174628 | 272. 304 | 6510561. 65  |
| M124T216   | 123. 5173987 | 216. 359 | 11398513. 83 |
| M124T82    | 123. 927459  | 82. 0569 | 13032903. 41 |
| M124T211   | 124. 0225018 | 211. 288 | 703936. 9507 |
| M124T382   | 124. 023457  | 382. 125 | 11461888. 7  |

|          |              |          |              |
|----------|--------------|----------|--------------|
| M124T358 | 124. 0231147 | 357. 958 | 70253678. 29 |
| M124T99  | 124. 0392993 | 98. 9918 | 110444797    |
| M124T767 | 124. 040685  | 766. 742 | 51620884. 52 |
| M124T456 | 124. 0385958 | 456. 126 | 32198477. 24 |
| M124T600 | 124. 0385323 | 599. 621 | 42231806. 54 |
| M124T106 | 124. 0393031 | 105. 503 | 80537945. 08 |
| M124T662 | 124. 0409327 | 661. 979 | 80675625. 81 |
| M124T791 | 124. 0385036 | 790. 802 | 23397629     |
| M124T122 | 124. 0381637 | 122. 007 | 58614812. 12 |
| M124T496 | 124. 0386103 | 495. 779 | 29563427. 47 |
| M124T37  | 124. 042681  | 37. 1891 | 3734822. 125 |
| M124T540 | 124. 0386616 | 539. 764 | 117758900. 3 |
| M124T626 | 124. 0387853 | 626. 042 | 28001138. 46 |
| M124T503 | 124. 0385103 | 503. 046 | 21358420. 13 |
| M124T129 | 124. 0381687 | 129. 234 | 99704916. 66 |
| M124T708 | 124. 0408062 | 707. 557 | 28998127. 5  |
| M124T810 | 124. 0406644 | 810. 052 | 40763215. 57 |
| M124T74  | 124. 0404292 | 73. 8324 | 682008086. 2 |
| M124T114 | 124. 0382633 | 114. 15  | 72749348. 75 |
| M124T399 | 124. 0409957 | 399. 046 | 52784749. 99 |
| M124T388 | 124. 0411087 | 387. 763 | 40490319. 12 |
| M124T510 | 124. 0387924 | 510. 333 | 30879907. 35 |
| M124T415 | 124. 0385526 | 414. 82  | 69687907. 93 |
| M124T350 | 124. 0388093 | 349. 911 | 49740079. 42 |
| M124T248 | 124. 038462  | 247. 692 | 45107135. 35 |
| M124T633 | 124. 0385578 | 633. 476 | 24579638. 06 |
| M124T478 | 124. 0385478 | 477. 989 | 44851129. 41 |
| M124T145 | 124. 0393075 | 145. 382 | 817615630. 5 |
| M124T733 | 124. 0388765 | 732. 773 | 35668398. 18 |
| M124T336 | 124. 0411817 | 336. 344 | 71295071. 44 |
| M124T239 | 124. 0384583 | 238. 605 | 49635001. 42 |
| M124T378 | 124. 0389404 | 377. 704 | 56813491. 02 |
| M124T832 | 124. 038505  | 831. 709 | 14214130. 63 |
| M124T642 | 124. 0412894 | 642. 211 | 29172294. 07 |
| M124T487 | 124. 0385582 | 486. 885 | 26456845. 55 |
| M124T257 | 124. 0384473 | 257. 155 | 55373766. 48 |
| M124T716 | 124. 0385537 | 716. 403 | 23299154. 65 |
| M124T359 | 124. 0388779 | 359. 32  | 43115096. 29 |
| M124T279 | 124. 0384268 | 279. 039 | 68732133. 67 |
| M124T433 | 124. 0386012 | 433. 111 | 50312668. 48 |
| M124T466 | 124. 0385541 | 466. 162 | 35358610. 96 |
| M124T611 | 124. 0385823 | 611. 145 | 42564070. 23 |
| M124T298 | 124. 0387887 | 298. 135 | 95093484. 68 |
| M124T268 | 124. 0384609 | 268. 427 | 58426728. 94 |
| M124T195 | 124. 0385434 | 195. 23  | 256910547. 7 |
| M124T228 | 124. 0384203 | 227. 633 | 44929578. 92 |
| M124T694 | 124. 0409242 | 693. 81  | 38809350. 7  |
| M124T576 | 124. 0388634 | 575. 878 | 73712090. 48 |
| M124T448 | 124. 0388385 | 447. 531 | 36137589. 43 |
| M124T744 | 124. 0388994 | 744. 182 | 26775592. 95 |
| M124T781 | 124. 0385862 | 781. 303 | 22076636. 11 |
| M124T218 | 124. 0469599 | 217. 866 | 5239569. 006 |
| M124T537 | 124. 0753823 | 536. 761 | 17960781. 03 |
| M124T167 | 124. 075376  | 166. 613 | 17227492. 17 |

|            |              |          |              |
|------------|--------------|----------|--------------|
| M124T39    | 124. 0755128 | 39. 4128 | 24062154. 6  |
| M124T334   | 124. 0758133 | 333. 715 | 14264702. 31 |
| M124T250   | 124. 0758436 | 250. 144 | 23630023. 49 |
| M124T94    | 124. 0753379 | 93. 7378 | 11402749. 08 |
| M124T295   | 124. 0757823 | 295. 356 | 17491795. 23 |
| M124T69    | 124. 0754073 | 69. 2834 | 4266795. 561 |
| M124T111   | 124. 0755195 | 111. 382 | 9786184. 757 |
| M124T527   | 124. 0760022 | 526. 676 | 8082791. 151 |
| M124T284   | 124. 0758722 | 284. 377 | 9650629. 756 |
| M124T148   | 124. 0754833 | 148. 117 | 14770331. 29 |
| M124T354   | 124. 0761507 | 353. 978 | 17422065. 41 |
| M124T743   | 124. 0869862 | 742. 68  | 32401010. 57 |
| M124T785   | 124. 0871508 | 785. 136 | 37031053. 75 |
| M124T836   | 124. 087157  | 836. 034 | 51988770. 5  |
| M124T31    | 124. 0866031 | 31. 4047 | 12032705. 82 |
| M124T811   | 124. 0869702 | 811. 413 | 94612700. 12 |
| M124T761   | 124. 0869775 | 760. 916 | 53653349. 85 |
| M124T730   | 124. 0869641 | 729. 798 | 26633770. 04 |
| M124T286   | 124. 0865916 | 285. 9   | 7126941. 881 |
| M124T458   | 124. 1119127 | 457. 576 | 1588283. 322 |
| M124T563   | 124. 1197719 | 563. 297 | 23883480. 05 |
| M124T649   | 124. 1196522 | 649. 338 | 4456074. 986 |
| M125T771   | 124. 5438629 | 771. 042 | 11189317. 55 |
| M125T757   | 124. 5436852 | 757. 001 | 14279608. 76 |
| M125T82    | 124. 9223418 | 82. 0569 | 206966905. 5 |
| M125T75    | 125. 0111578 | 74. 9588 | 31150619. 5  |
| M125T351   | 125. 0236827 | 351. 348 | 16695596. 5  |
| M125T101   | 125. 0232365 | 101. 161 | 89789607. 34 |
| M125T148   | 125. 0235615 | 148. 117 | 24955234. 37 |
| M125T37    | 125. 0376698 | 37. 1891 | 9563386. 138 |
| M125T59    | 125. 0376214 | 58. 6151 | 4483369. 839 |
| M125T99    | 125. 0422056 | 98. 9918 | 4288135. 722 |
| M125T74    | 125. 0376548 | 73. 8324 | 684806424. 9 |
| M125T145   | 125. 0422202 | 145. 382 | 47736779. 41 |
| M125T51    | 125. 0376319 | 51. 1942 | 3587618. 438 |
| M125T321   | 125. 0390859 | 321. 198 | 6716431. 076 |
| M125T368   | 125. 0416513 | 367. 949 | 11496024. 23 |
| M125T68    | 125. 0593296 | 68. 0903 | 6078774. 749 |
| M125T543_1 | 125. 0599898 | 542. 766 | 125249761. 4 |
| M125T785   | 125. 0709054 | 785. 136 | 16115998. 63 |
| M125T836   | 125. 0707646 | 836. 034 | 29673579. 4  |
| M125T325   | 125. 0709062 | 325. 35  | 14181187. 14 |
| M125T807   | 125. 0712487 | 807. 232 | 14264081. 6  |
| M125T335   | 125. 0709506 | 334. 966 | 27937545. 17 |
| M125T350   | 125. 0709304 | 349. 911 | 31903915. 54 |
| M125T818   | 125. 0708248 | 818. 418 | 13075936. 25 |
| M125T177   | 125. 0705564 | 177. 295 | 13608497. 31 |
| M125T799   | 125. 0707971 | 799. 089 | 11639525. 97 |
| M125T104   | 125. 0704942 | 104. 493 | 18605805. 38 |
| M125T39    | 125. 0785578 | 39. 4128 | 519946. 301  |
| M125T563   | 125. 0959383 | 563. 297 | 12649708. 58 |
| M125T656   | 125. 0963807 | 655. 9   | 15165099. 17 |
| M125T405   | 125. 0964538 | 404. 872 | 15917752. 07 |
| M125T543_2 | 125. 0963199 | 542. 766 | 13800915. 15 |

|            |             |         |             |
|------------|-------------|---------|-------------|
| M125T66    | 125.0964023 | 65.7101 | 12154100.93 |
| M126T121_1 | 125.5156444 | 120.525 | 26210688.17 |
| M126T61    | 125.5290657 | 61.1538 | 984684.9809 |
| M126T67    | 125.5290288 | 66.9841 | 1009645.487 |
| M126T809   | 125.5291545 | 808.678 | 7339285.798 |
| M126T36    | 125.5290499 | 35.8675 | 6168377.478 |
| M126T830   | 125.5291069 | 830.193 | 2565062.597 |
| M126T789   | 125.5291905 | 789.293 | 38419475.87 |
| M126T802   | 125.5291957 | 801.685 | 9096969.11  |
| M126T48_1  | 125.5290439 | 47.6391 | 3532821.665 |
| M126T817   | 125.5291678 | 816.953 | 4826487.931 |
| M126T39    | 125.9636499 | 39.4128 | 7110746.547 |
| M126T66    | 125.9615937 | 65.7101 | 9798086.891 |
| M126T137_1 | 125.9866221 | 137.373 | 66472942.79 |
| M126T75    | 125.9861445 | 74.9588 | 815720788.4 |
| M126T48_2  | 125.9859283 | 47.6391 | 494986389.8 |
| M126T87    | 125.9859539 | 86.6643 | 19369397.47 |
| M126T148   | 125.9866386 | 148.117 | 66176499.04 |
| M126T35    | 126.0048089 | 34.5397 | 750452.3689 |
| M126T74    | 126.04078   | 73.8324 | 18907429.32 |
| M126T309_1 | 126.0542529 | 308.967 | 50505693.51 |
| M126T558   | 126.0542179 | 557.967 | 28588008.65 |
| M126T158   | 126.0541512 | 157.773 | 80468422.81 |
| M126T348   | 126.0548711 | 348.488 | 85640724.97 |
| M126T432   | 126.054258  | 431.64  | 60153158.21 |
| M126T836   | 126.0542709 | 836.034 | 11618581.47 |
| M126T649   | 126.054252  | 649.338 | 72413307.17 |
| M126T420   | 126.0543017 | 420.274 | 47119161.8  |
| M126T412   | 126.0542791 | 411.838 | 60155809.34 |
| M126T165   | 126.0541593 | 165.217 | 80119714.88 |
| M126T398   | 126.0542612 | 397.878 | 124740738.4 |
| M126T106   | 126.0549374 | 105.503 | 1022793590  |
| M126T804   | 126.0542524 | 804.327 | 20729901.61 |
| M126T711   | 126.0542253 | 710.534 | 34218308.19 |
| M126T551   | 126.0542807 | 550.919 | 25033422.1  |
| M126T121_2 | 126.0540172 | 120.525 | 331089550.8 |
| M126T446   | 126.0542661 | 445.984 | 50337530.71 |
| M126T672   | 126.0542505 | 671.649 | 26616911.45 |
| M126T336   | 126.0549007 | 336.344 | 95880522.97 |
| M126T210   | 126.0548791 | 210.186 | 118476576.5 |
| M126T601   | 126.0542584 | 601.04  | 31490529.46 |
| M126T625   | 126.0542466 | 624.608 | 30100261.63 |
| M126T591   | 126.0542646 | 590.607 | 32328439.1  |
| M126T568   | 126.054235  | 568.464 | 23918415.54 |
| M126T690   | 126.0542374 | 689.5   | 67940783.27 |
| M126T382   | 126.0548842 | 382.125 | 203524526.5 |
| M126T298   | 126.0542584 | 298.135 | 61384271.37 |
| M126T268   | 126.0542852 | 268.427 | 70778639.77 |
| M126T228   | 126.0542369 | 227.633 | 127881047.8 |
| M126T133   | 126.0548744 | 133.259 | 230458310.1 |
| M126T280   | 126.0542443 | 280.345 | 113568817.9 |
| M126T178   | 126.0549289 | 178.408 | 218238298.1 |
| M126T823   | 126.0542641 | 822.881 | 28159322.7  |
| M126T614   | 126.0542653 | 614.215 | 42554090.5  |



|            |              |          |              |
|------------|--------------|----------|--------------|
| M126T324   | 126. 0542403 | 323. 984 | 59511554. 69 |
| M126T456   | 126. 0558348 | 456. 126 | 39114707. 54 |
| M126T665   | 126. 0557759 | 664. 745 | 16233953. 02 |
| M126T522   | 126. 0555701 | 522. 177 | 25486649. 46 |
| M126T541   | 126. 0557476 | 541. 275 | 37889750. 9  |
| M126T497   | 126. 0557076 | 497. 214 | 34588543. 32 |
| M126T475   | 126. 0558321 | 475. 007 | 34944891. 36 |
| M126T515   | 126. 055705  | 514. 727 | 31703817. 08 |
| M126T795   | 126. 0554434 | 795. 165 | 18480290. 1  |
| M126T506   | 126. 0554172 | 505. 855 | 30106003. 67 |
| M126T765   | 126. 0554141 | 765. 406 | 21952354. 76 |
| M126T258   | 126. 0556624 | 258. 489 | 51238978. 66 |
| M126T482   | 126. 0557377 | 482. 436 | 32990155. 34 |
| M126T530   | 126. 0558106 | 529. 713 | 23683588. 1  |
| M126T245   | 126. 0554418 | 245. 199 | 94284636. 92 |
| M126T757   | 126. 0556069 | 757. 001 | 25157040. 01 |
| M126T466   | 126. 0556236 | 466. 162 | 33759320. 24 |
| M126T576   | 126. 0557605 | 575. 878 | 38859887. 3  |
| M126T365   | 126. 0555254 | 365. 061 | 106879662. 7 |
| M126T780   | 126. 0556014 | 780. 043 | 24682780. 67 |
| M126T192   | 126. 064869  | 192. 437 | 28066977. 32 |
| M126T104   | 126. 0657707 | 104. 493 | 16535470. 26 |
| M126T211   | 126. 0664532 | 211. 288 | 41156968. 05 |
| M126T730   | 126. 05565   | 729. 798 | 63279094. 35 |
| M126T147   | 126. 0909694 | 146. 742 | 6202081. 744 |
| M126T137_2 | 126. 0911081 | 137. 373 | 6408793. 67  |
| M126T129   | 126. 0910609 | 129. 234 | 6927236. 494 |
| M126T103   | 126. 0911102 | 103. 423 | 9791089. 263 |
| M126T121_3 | 126. 0911079 | 120. 525 | 8785121. 423 |
| M126T113   | 126. 0910718 | 112. 781 | 9128996. 919 |
| M126T309_2 | 126. 1025246 | 308. 967 | 7331274. 538 |
| M127T241   | 126. 5543521 | 241. 368 | 4696464. 047 |
| M127T82    | 126. 9203901 | 82. 0569 | 5762822. 523 |
| M127T49    | 126. 9893225 | 48. 7362 | 3177051. 91  |
| M127T54    | 126. 9900112 | 53. 6731 | 4090574. 246 |
| M127T74    | 126. 989112  | 73. 8324 | 21412817. 67 |
| M127T42    | 126. 9901262 | 41. 798  | 4657081. 993 |
| M127T62    | 126. 9900444 | 62. 1777 | 7740974. 808 |
| M127T359_1 | 126. 9923525 | 359. 32  | 5911100. 993 |
| M127T158   | 127. 0373378 | 157. 773 | 1182829035   |
| M127T190   | 127. 0372465 | 189. 571 | 680982995. 1 |
| M127T180_1 | 127. 0372072 | 179. 75  | 753770370. 8 |
| M127T129   | 127. 0372037 | 129. 234 | 662987064. 3 |
| M127T651   | 127. 0372964 | 650. 898 | 322972746. 6 |
| M127T239   | 127. 0372395 | 238. 605 | 418453902. 1 |
| M127T731   | 127. 0374272 | 731. 347 | 228162459. 2 |
| M127T230   | 127. 0378576 | 230. 321 | 334571391. 6 |
| M127T223   | 127. 0396032 | 223. 474 | 534383480. 8 |
| M127T101   | 127. 0383828 | 101. 161 | 5752143758   |
| M127T622   | 127. 039598  | 621. 708 | 161348351. 2 |
| M127T705   | 127. 0396115 | 704. 715 | 150938753. 3 |
| M127T263   | 127. 0395879 | 262. 529 | 729954235. 3 |
| M127T293   | 127. 0384222 | 292. 623 | 1191574411   |
| M127T604   | 127. 0395878 | 603. 95  | 104451825. 2 |

|            |              |          |              |
|------------|--------------|----------|--------------|
| M127T537   | 127. 0405377 | 536. 761 | 151743144. 5 |
| M127T199   | 127. 0395717 | 199. 43  | 547407026. 8 |
| M127T516   | 127. 0395868 | 516. 214 | 265345993. 2 |
| M127T389   | 127. 0395834 | 389. 035 | 508265822. 5 |
| M127T250   | 127. 0395934 | 250. 144 | 435153673. 2 |
| M127T143   | 127. 0384176 | 142. 85  | 1050057487   |
| M127T811   | 127. 0395998 | 811. 413 | 80585472. 73 |
| M127T611   | 127. 0395979 | 611. 145 | 112890122. 6 |
| M127T594   | 127. 0405361 | 593. 62  | 141953002. 9 |
| M127T446   | 127. 0395837 | 445. 984 | 936991988. 8 |
| M127T210   | 127. 0396026 | 210. 186 | 626322944. 5 |
| M127T685   | 127. 0396027 | 684. 985 | 344805415. 6 |
| M127T465   | 127. 0407131 | 464. 668 | 220723843. 7 |
| M127T832   | 127. 0396092 | 831. 709 | 75842112. 55 |
| M127T632   | 127. 0395888 | 631. 982 | 142863476. 6 |
| M127T551   | 127. 0405241 | 550. 919 | 206364617. 3 |
| M127T278_1 | 127. 039609  | 277. 699 | 574692380. 5 |
| M127T359_2 | 127. 0384185 | 359. 32  | 2810713262   |
| M127T403   | 127. 0395711 | 403. 447 | 708962737. 1 |
| M127T659   | 127. 0395953 | 658. 953 | 232401789. 7 |
| M127T321   | 127. 039589  | 321. 198 | 1303561196   |
| M127T713   | 127. 0395888 | 713. 464 | 135896325. 9 |
| M127T821   | 127. 0395655 | 821. 334 | 65988471. 01 |
| M127T573   | 127. 0404889 | 573. 072 | 247993321. 6 |
| M127T802   | 127. 0396034 | 801. 685 | 83948669. 96 |
| M127T772_1 | 127. 0395786 | 772. 206 | 369506999. 6 |
| M127T502   | 127. 0395764 | 501. 549 | 276416825. 4 |
| M127T792   | 127. 039606  | 792. 146 | 100712787. 4 |
| M127T480   | 127. 0407148 | 479. 527 | 190119849. 6 |
| M127T97    | 127. 0496349 | 96. 7698 | 36969381. 18 |
| M127T342   | 127. 0504277 | 341. 802 | 133641940. 3 |
| M127T180_2 | 127. 0576785 | 179. 75  | 9619212. 075 |
| M127T106   | 127. 05838   | 105. 503 | 65317607. 27 |
| M127T382   | 127. 0579507 | 382. 125 | 11340534. 2  |
| M127T278_2 | 127. 0504572 | 277. 699 | 67867626. 83 |
| M127T103   | 127. 068849  | 103. 423 | 73011791. 92 |
| M127T116   | 127. 0687605 | 115. 522 | 6215594. 245 |
| M127T123   | 127. 0868816 | 123. 262 | 19368875. 89 |
| M127T359_3 | 127. 085006  | 359. 32  | 5467390. 835 |
| M127T104   | 127. 0860583 | 104. 493 | 12033414. 59 |
| M127T148   | 127. 0863139 | 148. 117 | 14496273. 3  |
| M127T66    | 127. 0993274 | 65. 7101 | 2353948. 989 |
| M127T649   | 127. 1120561 | 649. 338 | 43576691. 41 |
| M127T660   | 127. 1119473 | 660. 455 | 30241652. 61 |
| M127T682   | 127. 1119428 | 681. 885 | 17012383. 4  |
| M127T670   | 127. 1118764 | 670. 166 | 15753732. 34 |
| M127T562   | 127. 111991  | 561. 955 | 156820934    |
| M127T692   | 127. 1118646 | 692. 461 | 15236706     |
| M127T740   | 127. 1113618 | 740. 014 | 11059925. 89 |
| M127T703   | 127. 111947  | 703. 35  | 52687382. 29 |
| M127T545   | 127. 1119738 | 545. 203 | 76289586. 08 |
| M127T715   | 127. 1119809 | 715. 011 | 29888253. 06 |
| M127T576   | 127. 1119211 | 575. 878 | 16737641. 13 |
| M127T772_2 | 127. 1119334 | 772. 206 | 11753607. 55 |

|            |              |          |              |
|------------|--------------|----------|--------------|
| M128T127   | 127. 5200242 | 126. 785 | 1190066. 854 |
| M128T75_1  | 127. 9720282 | 74. 9588 | 13988372. 02 |
| M128T61    | 128. 0187266 | 61. 1538 | 77870510. 52 |
| M128T137   | 128. 0201543 | 137. 373 | 15978703. 61 |
| M128T75_2  | 128. 0187848 | 74. 9588 | 10455659677  |
| M128T49    | 128. 0187282 | 48. 7362 | 31341617. 73 |
| M128T280   | 128. 0199225 | 280. 345 | 29590636. 85 |
| M128T310   | 128. 0341735 | 310. 075 | 6880638. 27  |
| M128T101_1 | 128. 0418993 | 101. 161 | 121863440. 4 |
| M128T107_1 | 128. 0419347 | 106. 513 | 121123447. 3 |
| M128T158   | 128. 0415909 | 157. 773 | 79054904. 75 |
| M128T293   | 128. 0416373 | 292. 623 | 68715726. 03 |
| M128T94    | 128. 0419296 | 93. 7378 | 102963768. 3 |
| M128T359   | 128. 0416641 | 359. 32  | 161231205    |
| M128T403   | 128. 0415474 | 403. 447 | 59424952. 7  |
| M128T188   | 128. 0415239 | 188. 126 | 112326165. 9 |
| M128T39    | 128. 0441374 | 39. 4128 | 15722156. 9  |
| M128T143_1 | 128. 042953  | 142. 85  | 60000737. 09 |
| M128T210   | 128. 0434987 | 210. 186 | 32999202. 8  |
| M128T341   | 128. 0533847 | 340. 548 | 6085900. 195 |
| M128T278   | 128. 0532181 | 277. 699 | 2535370. 687 |
| M128T101_2 | 128. 0707178 | 101. 161 | 90386608. 19 |
| M128T86    | 128. 0700599 | 85. 6453 | 26436570. 6  |
| M128T225   | 128. 0706858 | 224. 729 | 93961370. 73 |
| M128T93    | 128. 0707981 | 92. 7272 | 61482703. 54 |
| M128T172   | 128. 0702243 | 171. 935 | 45985394. 03 |
| M128T197   | 128. 075417  | 196. 644 | 2956165. 464 |
| M128T126   | 128. 081376  | 125. 598 | 15208873. 83 |
| M128T143_2 | 128. 081317  | 142. 85  | 10600085. 54 |
| M128T107_2 | 128. 0821366 | 106. 513 | 41720168. 6  |
| M128T785   | 128. 0886566 | 785. 136 | 11195513. 61 |
| M128T119   | 128. 1072361 | 119. 433 | 47207101. 91 |
| M128T161   | 128. 1071842 | 161. 494 | 22103563. 62 |
| M128T104   | 128. 1070113 | 104. 493 | 61755207. 9  |
| M128T562   | 128. 1145913 | 561. 955 | 9233928. 204 |
| M128T651   | 128. 114644  | 650. 898 | 3181803. 487 |
| M128T703   | 128. 1144434 | 703. 35  | 2827853. 045 |
| M128T365   | 128. 1428983 | 365. 061 | 6353898. 687 |
| M129T137   | 128. 9505221 | 137. 373 | 10241772. 29 |
| M129T68_1  | 128. 9503645 | 68. 0903 | 31056364. 2  |
| M129T116   | 128. 9504758 | 115. 522 | 11336112. 97 |
| M129T148   | 128. 9507296 | 148. 117 | 15402668. 96 |
| M129T38_1  | 129. 0180777 | 38. 3208 | 2286196. 146 |
| M129T309   | 129. 0194925 | 308. 967 | 53171957. 3  |
| M129T164   | 129. 0179124 | 163. 846 | 990649327. 1 |
| M129T61    | 129. 0186793 | 61. 1538 | 12450598. 04 |
| M129T102   | 129. 0179288 | 102. 247 | 15066309. 38 |
| M129T74    | 129. 0188421 | 73. 8324 | 1164517008   |
| M129T143   | 129. 0186771 | 142. 85  | 65600440. 8  |
| M129T45    | 129. 0180308 | 45. 3435 | 5465829. 154 |
| M129T261   | 129. 0197068 | 261. 177 | 37064927. 6  |
| M129T211   | 129. 0256993 | 211. 288 | 25507104. 42 |
| M129T101_1 | 129. 0431902 | 101. 161 | 13668069. 52 |
| M129T293   | 129. 0431427 | 292. 623 | 4704800. 784 |

|            |              |          |              |
|------------|--------------|----------|--------------|
| M129T359   | 129. 0431277 | 359. 32  | 14846516. 63 |
| M129T287   | 129. 0549463 | 287. 148 | 35045627. 2  |
| M129T409   | 129. 0550847 | 409. 271 | 197526188. 7 |
| M129T558   | 129. 054157  | 557. 967 | 16461143. 76 |
| M129T310   | 129. 0551724 | 310. 075 | 33989153. 16 |
| M129T343   | 129. 0550484 | 343. 226 | 46885713. 91 |
| M129T395   | 129. 0550322 | 395. 264 | 71818580. 04 |
| M129T427   | 129. 055094  | 427. 362 | 70240695. 43 |
| M129T92    | 129. 0551002 | 91. 7174 | 172074806. 7 |
| M129T101_2 | 129. 0550497 | 101. 161 | 76977369. 12 |
| M129T96    | 129. 0653552 | 95. 7572 | 660880272. 6 |
| M129T339   | 129. 0655331 | 339. 085 | 2440668. 792 |
| M129T567   | 129. 0681929 | 567. 1   | 7368577. 825 |
| M129T226   | 129. 0735229 | 226. 202 | 4116946. 305 |
| M129T39    | 129. 0735008 | 39. 4128 | 2494463. 841 |
| M129T68_2  | 129. 0734183 | 68. 0903 | 802281. 5064 |
| M129T56    | 129. 0735309 | 56. 1096 | 2981327. 39  |
| M129T78    | 129. 0836615 | 78. 3841 | 6137124. 108 |
| M129T106   | 129. 1020008 | 105. 503 | 8440625. 482 |
| M129T232   | 129. 1017867 | 231. 773 | 2223901. 209 |
| M129T504   | 129. 1018543 | 504. 466 | 2586257. 497 |
| M129T38_2  | 129. 1098934 | 38. 3208 | 1539870. 906 |
| M129T453   | 129. 127973  | 453. 317 | 15999074. 2  |
| M129T662   | 129. 1279924 | 661. 979 | 23680052. 73 |
| M129T412   | 129. 1279608 | 411. 838 | 17447723. 16 |
| M129T435   | 129. 1280068 | 434. 589 | 34562213     |
| M129T163   | 129. 1279853 | 162. 728 | 47249587. 32 |
| M129T353   | 129. 1281485 | 352. 65  | 32511610. 81 |
| M129T140   | 129. 1280216 | 140. 286 | 52241861. 97 |
| M129T392   | 129. 1280131 | 391. 678 | 23361039. 12 |
| M129T334   | 129. 1279883 | 333. 715 | 21991552. 22 |
| M129T419   | 129. 1279684 | 418. 97  | 26230679     |
| M129T461   | 129. 1279538 | 460. 537 | 19203653. 14 |
| M129T325   | 129. 1279836 | 325. 35  | 26488916. 84 |
| M129T225   | 129. 1279904 | 224. 729 | 62405207. 56 |
| M129T207   | 129. 1279808 | 207. 393 | 43095455. 71 |
| M129T405   | 129. 1279721 | 404. 872 | 17904785. 02 |
| M129T566   | 129. 1267991 | 565. 79  | 16425213. 78 |
| M129T534   | 129. 1279829 | 533. 958 | 24935645. 49 |
| M129T199   | 129. 1281197 | 199. 43  | 50791530. 07 |
| M129T341   | 129. 1280512 | 340. 548 | 24895276. 26 |
| M129T129   | 129. 128072  | 129. 234 | 55070474. 26 |
| M129T469   | 129. 1279703 | 469. 252 | 19366394. 64 |
| M129T499   | 129. 1279842 | 498. 645 | 28714525. 04 |
| M129T811   | 129. 127956  | 811. 413 | 15051008. 63 |
| M129T510   | 129. 1279828 | 510. 333 | 23231692. 82 |
| M129T239   | 129. 1268308 | 238. 605 | 59677641. 3  |
| M129T547   | 129. 1279799 | 546. 651 | 41791221. 21 |
| M129T177   | 129. 1280186 | 177. 295 | 75160643. 04 |
| M129T150   | 129. 1280338 | 149. 65  | 46696576. 13 |
| M129T371   | 129. 1279744 | 370. 777 | 28488834. 72 |
| M129T382   | 129. 1280005 | 382. 125 | 28057877. 61 |
| M129T827   | 129. 1279781 | 827. 271 | 27715563. 49 |
| M129T799   | 129. 1268288 | 799. 089 | 18743002. 76 |

|            |              |          |              |
|------------|--------------|----------|--------------|
| M129T361   | 129. 1279829 | 360. 794 | 22597142. 03 |
| M129T216   | 129. 1279666 | 216. 359 | 51683321. 9  |
| M129T679   | 129. 1280333 | 678. 909 | 20161067. 82 |
| M129T443   | 129. 1279883 | 443. 256 | 19614558. 79 |
| M129T652   | 129. 1279017 | 651. 956 | 18897068. 82 |
| M129T521   | 129. 1279718 | 520. 739 | 21679276. 35 |
| M129T784   | 129. 1278566 | 783. 78  | 20658714. 64 |
| M129T773   | 129. 1278857 | 773. 437 | 11538682. 1  |
| M129T576   | 129. 1280218 | 575. 878 | 23834844. 07 |
| M129T280   | 129. 128106  | 280. 345 | 340658309. 7 |
| M129T588   | 129. 1268655 | 587. 521 | 80058899. 82 |
| M129T722   | 129. 1280866 | 722. 193 | 116464233. 3 |
| M129T480   | 129. 1280192 | 479. 527 | 34722908. 63 |
| M129T68_3  | 129. 1398114 | 68. 0903 | 1149302. 812 |
| M130T789   | 129. 5241178 | 789. 293 | 7196893. 212 |
| M130T810   | 129. 5241423 | 810. 052 | 4404365. 482 |
| M130T783   | 129. 5241333 | 782. 558 | 6339410. 67  |
| M130T830   | 129. 5241912 | 830. 193 | 4298451. 324 |
| M130T803   | 129. 524161  | 802. 88  | 6516499. 05  |
| M130T211   | 129. 5271532 | 211. 288 | 1857512. 086 |
| M130T46    | 129. 9793059 | 46. 447  | 13255452. 54 |
| M130T75    | 129. 9785714 | 74. 9588 | 13301924. 79 |
| M130T137   | 130. 0075753 | 137. 373 | 7359102. 761 |
| M130T154   | 130. 007679  | 153. 785 | 6995573. 621 |
| M130T176_1 | 130. 0014284 | 175. 952 | 42263560. 24 |
| M130T44    | 130. 0074837 | 44. 1485 | 42576307. 56 |
| M130T164   | 130. 0212871 | 163. 846 | 52065973. 99 |
| M130T74    | 130. 0172068 | 73. 8324 | 1410995699   |
| M130T197_1 | 130. 0503757 | 196. 644 | 824517365. 3 |
| M130T89    | 130. 0503919 | 88. 6838 | 706691598. 7 |
| M130T176_2 | 130. 0493296 | 175. 952 | 19711810505  |
| M130T311   | 130. 0575762 | 311. 445 | 1404014. 067 |
| M130T409   | 130. 0577636 | 409. 271 | 12101619. 69 |
| M130T36_1  | 130. 0647888 | 35. 8675 | 3417642. 341 |
| M130T533   | 130. 0637864 | 532. 526 | 2911241. 963 |
| M130T70    | 130. 0647366 | 70. 3428 | 590833. 1826 |
| M130T62    | 130. 064801  | 62. 1777 | 3467064. 46  |
| M130T426   | 130. 0649155 | 425. 909 | 5374791. 412 |
| M130T96    | 130. 0688635 | 95. 7572 | 31813456. 44 |
| M130T731   | 130. 0871004 | 731. 347 | 19157961. 35 |
| M130T737   | 130. 0853754 | 737. 198 | 18963498. 95 |
| M130T351_1 | 130. 0853504 | 351. 348 | 42368634. 17 |
| M130T705   | 130. 0873356 | 704. 715 | 21369058. 03 |
| M130T557   | 130. 0853307 | 556. 816 | 28004594. 51 |
| M130T603   | 130. 087252  | 602. 513 | 16827796. 12 |
| M130T518   | 130. 0853616 | 517. 762 | 30276177. 71 |
| M130T439   | 130. 0853025 | 439. 021 | 21614976. 9  |
| M130T328   | 130. 0853291 | 328. 106 | 22798581. 46 |
| M130T207   | 130. 0853447 | 207. 393 | 36373846. 04 |
| M130T537   | 130. 0853603 | 536. 761 | 54123438     |
| M130T80    | 130. 085611  | 79. 643  | 153122853. 2 |
| M130T744   | 130. 0853913 | 744. 182 | 25849469. 87 |
| M130T751   | 130. 085332  | 751. 333 | 24351916. 13 |
| M130T481   | 130. 0877289 | 481. 042 | 22028130. 73 |

|            |              |          |              |
|------------|--------------|----------|--------------|
| M130T712   | 130. 0876592 | 711. 984 | 30721939. 79 |
| M130T724   | 130. 0853469 | 723. 682 | 31940235. 77 |
| M130T246   | 130. 0853393 | 246. 372 | 59347576. 04 |
| M130T282   | 130. 0853127 | 281. 666 | 76590392. 6  |
| M130T395   | 130. 085379  | 395. 264 | 29228721. 67 |
| M130T364   | 130. 0853564 | 363. 58  | 20807762. 85 |
| M130T455   | 130. 0878031 | 454. 739 | 26843030. 89 |
| M130T418   | 130. 0853805 | 417. 676 | 32044416. 72 |
| M130T143_1 | 130. 0855899 | 142. 85  | 2318790462   |
| M130T811   | 130. 0852271 | 811. 413 | 128561655. 4 |
| M130T506   | 130. 0853837 | 505. 855 | 35443475. 55 |
| M130T371_1 | 130. 0853725 | 370. 777 | 28663670. 94 |
| M130T448   | 130. 0875968 | 447. 531 | 18540209. 32 |
| M130T302   | 130. 0853671 | 302. 191 | 41493444. 91 |
| M130T633   | 130. 0875591 | 633. 476 | 117726551. 8 |
| M130T110_1 | 130. 0851516 | 110. 047 | 3770828518   |
| M130T405   | 130. 085339  | 404. 872 | 33554164. 78 |
| M130T672   | 130. 0871511 | 671. 649 | 46126349. 02 |
| M130T465   | 130. 0872203 | 464. 668 | 26225546. 52 |
| M130T381   | 130. 0853375 | 380. 63  | 24664211. 09 |
| M130T123   | 130. 0848303 | 123. 262 | 1723294239   |
| M130T427   | 130. 0853607 | 427. 362 | 29176755. 8  |
| M130T177   | 130. 08736   | 177. 295 | 220438193. 8 |
| M130T197_2 | 130. 0853716 | 196. 644 | 39318780. 83 |
| M130T338   | 130. 0853724 | 337. 767 | 34853253. 46 |
| M130T690   | 130. 0875577 | 689. 5   | 56738765. 97 |
| M130T827   | 130. 0853695 | 827. 271 | 50795743. 68 |
| M130T216   | 130. 0876962 | 216. 359 | 25325041. 57 |
| M130T256   | 130. 085371  | 255. 723 | 30441786. 46 |
| M130T228   | 130. 0875665 | 227. 633 | 55169707. 9  |
| M130T589   | 130. 087687  | 589. 053 | 49589181. 1  |
| M130T494   | 130. 0872963 | 494. 289 | 32496520. 2  |
| M130T567   | 130. 0853124 | 567. 1   | 27873590. 01 |
| M130T317   | 130. 0853598 | 317. 199 | 44180327. 87 |
| M130T272   | 130. 0962653 | 272. 304 | 28486585. 32 |
| M130T291   | 130. 097185  | 291. 307 | 75622069. 51 |
| M130T351_2 | 130. 0979202 | 351. 348 | 15560743. 69 |
| M130T122   | 130. 0971321 | 122. 007 | 3262242343   |
| M130T325   | 130. 0979782 | 325. 35  | 13842965. 28 |
| M130T335   | 130. 0978732 | 334. 966 | 9736696. 221 |
| M130T393   | 130. 0964821 | 392. 715 | 9002947. 918 |
| M130T108_1 | 130. 0957218 | 107. 537 | 5899606915   |
| M130T143_2 | 130. 0971701 | 142. 85  | 1768098618   |
| M130T422   | 130. 0979795 | 421. 784 | 10026857. 32 |
| M130T371_2 | 130. 0962322 | 370. 777 | 8058856. 402 |
| M130T620   | 130. 1223282 | 620. 172 | 8852369. 624 |
| M130T110_2 | 130. 1219459 | 110. 047 | 12793537. 52 |
| M130T237   | 130. 1223103 | 237. 171 | 3557125. 37  |
| M130T438   | 130. 1224971 | 437. 571 | 7670809. 49  |
| M130T126   | 130. 145611  | 125. 598 | 4000149. 741 |
| M130T108_2 | 130. 1452258 | 107. 537 | 9872576. 806 |
| M130T443   | 130. 1597134 | 443. 256 | 77182860. 13 |
| M130T36_2  | 130. 4915209 | 35. 8675 | 3332713. 825 |
| M131T820   | 130. 5219081 | 819. 78  | 115461159. 9 |

|            |              |          |              |
|------------|--------------|----------|--------------|
| M131T827   | 130. 5210765 | 827. 271 | 69547575. 24 |
| M131T760_1 | 130. 5226583 | 759. 605 | 435627276. 7 |
| M131T803   | 130. 5219833 | 802. 88  | 136584509. 4 |
| M131T35    | 130. 5225702 | 34. 5397 | 20417829. 16 |
| M131T783_1 | 130. 5225933 | 782. 558 | 272350546. 3 |
| M131T264   | 130. 5260173 | 264. 079 | 11087205. 58 |
| M131T250   | 130. 5252869 | 250. 144 | 7187838. 492 |
| M131T150   | 130. 5253911 | 149. 65  | 8327125. 63  |
| M131T767   | 130. 5339086 | 766. 742 | 53513911. 08 |
| M131T829   | 130. 5328279 | 828. 73  | 26416247. 06 |
| M131T727   | 130. 5331122 | 726. 707 | 152103415. 3 |
| M131T750   | 130. 5340692 | 749. 96  | 63256474. 34 |
| M131T807   | 130. 5338497 | 807. 232 | 25206872. 31 |
| M131T796   | 130. 5337362 | 796. 474 | 23588902. 18 |
| M131T760_2 | 130. 5331326 | 759. 605 | 12269015. 62 |
| M131T697   | 130. 5341113 | 696. 575 | 26909764. 88 |
| M131T783_2 | 130. 5339243 | 782. 558 | 30054299. 34 |
| M131T241_1 | 130. 5620109 | 241. 368 | 1496356. 709 |
| M131T233   | 130. 6015907 | 233. 081 | 1239053. 143 |
| M131T137   | 130. 9659603 | 137. 373 | 7365102. 192 |
| M131T68_1  | 130. 9660137 | 68. 0903 | 27158709. 77 |
| M131T121   | 130. 9990384 | 120. 525 | 7266007. 237 |
| M131T113   | 130. 9991471 | 112. 781 | 2687718. 139 |
| M131T75    | 131. 0197252 | 74. 9588 | 42980790. 71 |
| M131T164   | 131. 0223038 | 163. 846 | 6842166. 424 |
| M131T788   | 131. 0224805 | 787. 856 | 35491661. 19 |
| M131T833   | 131. 0233631 | 833. 029 | 5321999. 923 |
| M131T818   | 131. 0234087 | 818. 418 | 9346559. 693 |
| M131T61_1  | 131. 0335767 | 61. 1538 | 4299238. 958 |
| M131T309   | 131. 0343021 | 308. 967 | 11563495. 29 |
| M131T36    | 131. 0338201 | 35. 8675 | 1001167. 035 |
| M131T68_2  | 131. 033527  | 68. 0903 | 1840432. 382 |
| M131T43    | 131. 0338085 | 43. 0471 | 2724266. 133 |
| M131T190   | 131. 0336459 | 189. 571 | 4931972. 613 |
| M131T241_2 | 131. 0335617 | 241. 368 | 5152648. 37  |
| M131T270   | 131. 033608  | 269. 528 | 19195977. 44 |
| M131T50    | 131. 0336999 | 50. 041  | 3012648. 207 |
| M131T181   | 131. 0335042 | 181. 154 | 4018660. 384 |
| M131T747   | 131. 0342115 | 746. 977 | 3722762. 759 |
| M131T156   | 131. 0334849 | 156. 393 | 9676254. 416 |
| M131T228   | 131. 0335229 | 227. 633 | 5580257. 152 |
| M131T212   | 131. 0334832 | 212. 448 | 7628470. 751 |
| M131T519   | 131. 0487978 | 519. 257 | 12638728. 11 |
| M131T416   | 131. 0489541 | 416. 239 | 2370509. 076 |
| M131T345   | 131. 0488586 | 344. 555 | 24314194. 28 |
| M131T620   | 131. 0486037 | 620. 172 | 2222297. 193 |
| M131T533   | 131. 0487199 | 532. 526 | 4861449. 315 |
| M131T449   | 131. 0489796 | 448. 978 | 6934296. 93  |
| M131T406   | 131. 0489483 | 406. 289 | 6158813. 406 |
| M131T197   | 131. 0532415 | 196. 644 | 38179608. 86 |
| M131T89    | 131. 0527911 | 88. 6838 | 28451671. 51 |
| M131T176   | 131. 0531801 | 175. 952 | 914655085. 9 |
| M131T409   | 131. 0603767 | 409. 271 | 221115. 0726 |
| M131T61_2  | 131. 0699039 | 61. 1538 | 3654989. 694 |

|            |              |          |              |
|------------|--------------|----------|--------------|
| M131T67    | 131. 0698586 | 66. 9841 | 2935020. 037 |
| M131T392   | 131. 0708286 | 391. 678 | 16897689. 29 |
| M131T103   | 131. 0704862 | 103. 423 | 15016817. 91 |
| M131T52    | 131. 0699685 | 52. 4521 | 5485242. 114 |
| M131T45    | 131. 0699626 | 45. 3435 | 3431564. 191 |
| M131T331   | 131. 0701114 | 330. 809 | 19500999. 65 |
| M131T305   | 131. 0708635 | 304. 777 | 13819024. 92 |
| M131T563   | 131. 0850681 | 563. 297 | 17691776. 36 |
| M131T232   | 131. 0811306 | 231. 773 | 10813545. 76 |
| M131T543   | 131. 0852476 | 542. 766 | 5945670. 539 |
| M131T143_1 | 131. 0893491 | 142. 85  | 127488538. 5 |
| M131T123   | 131. 0893152 | 123. 262 | 98904782. 89 |
| M131T109   | 131. 0892557 | 108. 698 | 203010542. 3 |
| M131T291   | 131. 1004922 | 291. 307 | 2022328. 007 |
| M131T122   | 131. 099492  | 122. 007 | 146540107. 9 |
| M131T108   | 131. 1004548 | 107. 537 | 286833177. 8 |
| M131T143_2 | 131. 0995068 | 142. 85  | 84375843. 19 |
| M131T518   | 131. 1175959 | 517. 762 | 1368764. 348 |
| M131T236   | 131. 1175429 | 235. 734 | 3945036. 945 |
| M131T78    | 131. 1284942 | 78. 3841 | 841873829. 3 |
| M132T767   | 131. 5323222 | 766. 742 | 178980908. 2 |
| M132T788   | 131. 5331354 | 787. 856 | 1106310903   |
| M132T33    | 131. 5331521 | 33. 467  | 59589381. 03 |
| M132T748   | 131. 5331431 | 748. 486 | 487646075. 8 |
| M132T760   | 131. 5331354 | 759. 605 | 446390273    |
| M132T826   | 131. 5331392 | 825. 74  | 788708935    |
| M132T730   | 131. 5320654 | 729. 798 | 858945833. 9 |
| M132T706   | 131. 5512192 | 706. 229 | 6532996. 21  |
| M132T655   | 131. 5519364 | 654. 542 | 2595282. 237 |
| M132T342   | 131. 7498403 | 341. 802 | 6589571. 013 |
| M132T46    | 131. 9300212 | 46. 447  | 4614474. 849 |
| M132T67    | 131. 9298225 | 66. 9841 | 10780314. 68 |
| M132T70    | 131. 9738539 | 70. 3428 | 42736436. 21 |
| M132T298_1 | 131. 9746507 | 298. 135 | 17393137. 62 |
| M132T809   | 132. 0322788 | 808. 678 | 124000797. 4 |
| M132T758   | 132. 0346113 | 758. 236 | 74110131. 74 |
| M132T731   | 132. 0360487 | 731. 347 | 33680377. 83 |
| M132T768_1 | 132. 0360474 | 768. 166 | 38482620. 38 |
| M132T246_1 | 132. 0523424 | 246. 372 | 16874407. 16 |
| M132T176   | 132. 0540528 | 175. 952 | 105414365. 5 |
| M132T403   | 132. 0566366 | 403. 447 | 1320356. 344 |
| M132T101   | 132. 0652197 | 101. 161 | 17134056. 89 |
| M132T163   | 132. 0657066 | 162. 728 | 13034009. 6  |
| M132T145_1 | 132. 0657523 | 145. 382 | 5110254. 547 |
| M132T139   | 132. 0658367 | 138. 766 | 8032903. 759 |
| M132T225   | 132. 0649889 | 224. 729 | 68904118. 79 |
| M132T154   | 132. 065806  | 153. 785 | 6482565. 438 |
| M132T90    | 132. 0657835 | 89. 6999 | 144107250    |
| M132T178   | 132. 0659002 | 178. 408 | 41300110. 63 |
| M132T45    | 132. 065339  | 45. 3435 | 18679444. 97 |
| M132T446   | 132. 0810044 | 445. 984 | 11894426. 83 |
| M132T109   | 132. 0903234 | 108. 698 | 14291964. 54 |
| M132T124   | 132. 0903388 | 124. 487 | 2098465. 991 |
| M132T195   | 132. 1036575 | 195. 23  | 58762571. 27 |



|            |              |          |              |
|------------|--------------|----------|--------------|
| M132T201   | 132. 1035269 | 200. 766 | 32688399. 61 |
| M132T309   | 132. 1005149 | 308. 967 | 64591536. 51 |
| M132T600   | 132. 1005356 | 599. 621 | 78313604. 93 |
| M132T137   | 132. 1036999 | 137. 373 | 43306790. 57 |
| M132T369   | 132. 1005886 | 369. 321 | 71049843. 84 |
| M132T413   | 132. 1005199 | 413. 295 | 85021497. 95 |
| M132T743   | 132. 1005119 | 742. 68  | 42205712. 25 |
| M132T453   | 132. 1037231 | 453. 317 | 106830394. 3 |
| M132T392   | 132. 1006241 | 391. 678 | 60791080. 46 |
| M132T348   | 132. 1005613 | 348. 488 | 171699524. 8 |
| M132T497   | 132. 1003841 | 497. 214 | 55888258. 72 |
| M132T131   | 132. 1036854 | 130. 668 | 29872491. 75 |
| M132T432   | 132. 100526  | 431. 64  | 54058588. 3  |
| M132T223   | 132. 1013872 | 223. 474 | 4339717221   |
| M132T475   | 132. 1004097 | 475. 007 | 49423019. 87 |
| M132T316   | 132. 1004929 | 315. 701 | 66545913. 42 |
| M132T167   | 132. 103494  | 166. 613 | 64350857. 19 |
| M132T736   | 132. 1005541 | 735. 7   | 64364533. 19 |
| M132T246_2 | 132. 1013727 | 246. 372 | 8342981903   |
| M132T623   | 132. 100451  | 623. 11  | 59524513. 92 |
| M132T516   | 132. 1005613 | 516. 214 | 58382724. 3  |
| M132T768_2 | 132. 1005634 | 768. 166 | 62134179. 59 |
| M132T145_2 | 132. 1036215 | 145. 382 | 38321455. 56 |
| M132T181   | 132. 103384  | 181. 154 | 49327332. 45 |
| M132T123   | 132. 1036906 | 123. 262 | 59454990. 81 |
| M132T572   | 132. 1005571 | 571. 523 | 149972713. 7 |
| M132T552   | 132. 1005845 | 552. 452 | 147981307. 4 |
| M132T633   | 132. 1005535 | 633. 476 | 70624607. 85 |
| M132T401   | 132. 1006309 | 400. 59  | 64392481. 51 |
| M132T673   | 132. 1036615 | 672. 956 | 292895720. 6 |
| M132T613   | 132. 1004289 | 612. 699 | 88835493. 38 |
| M132T485   | 132. 1003168 | 485. 471 | 81677399. 7  |
| M132T465   | 132. 100432  | 464. 668 | 79599742. 53 |
| M132T642   | 132. 1036568 | 642. 211 | 55242708. 02 |
| M132T753   | 132. 1005527 | 752. 541 | 51279421. 95 |
| M132T761   | 132. 1005222 | 760. 916 | 62829048. 68 |
| M132T507   | 132. 1005326 | 507. 343 | 73678618. 27 |
| M132T279   | 132. 1002536 | 279. 039 | 147692060. 4 |
| M132T298_2 | 132. 1004433 | 298. 135 | 74102256. 52 |
| M132T268   | 132. 1002638 | 268. 427 | 458433324    |
| M132T713   | 132. 1006208 | 713. 464 | 52649131. 43 |
| M132T156   | 132. 1036304 | 156. 393 | 63253813. 94 |
| M132T803   | 132. 1005534 | 802. 88  | 319929906. 5 |
| M132T525   | 132. 1037017 | 525. 132 | 72034371. 87 |
| M132T722   | 132. 1005889 | 722. 193 | 93988318. 11 |
| M132T379   | 132. 100595  | 379. 194 | 78888492. 75 |
| M132T324   | 132. 1005249 | 323. 984 | 90140371. 35 |
| M132T78    | 132. 1321243 | 78. 3841 | 42954361. 56 |
| M132T246_3 | 132. 1514922 | 246. 372 | 13238442. 72 |
| M133T272   | 132. 52273   | 272. 304 | 1639110. 865 |
| M133T216   | 132. 5227784 | 216. 359 | 6859560. 424 |
| M133T809   | 132. 5315387 | 808. 678 | 658930307. 9 |
| M133T33    | 132. 5309647 | 33. 467  | 22999930. 61 |
| M133T728   | 132. 5309628 | 728. 25  | 349754431. 2 |

|            |              |          |              |
|------------|--------------|----------|--------------|
| M133T760   | 132. 5315111 | 759. 605 | 215480308. 2 |
| M133T787   | 132. 5315394 | 786. 569 | 390118440. 4 |
| M133T697   | 132. 5309728 | 696. 575 | 39629765. 63 |
| M133T772   | 132. 5300915 | 772. 206 | 228528140. 7 |
| M133T106_1 | 132. 5758917 | 105. 503 | 13801444. 51 |
| M133T443   | 132. 9769388 | 443. 256 | 1274801. 296 |
| M133T55    | 132. 9766427 | 54. 867  | 815283. 9776 |
| M133T75    | 132. 9978422 | 74. 9588 | 185548800. 9 |
| M133T372   | 133. 0278416 | 372. 152 | 9117065. 468 |
| M133T252   | 133. 0294478 | 251. 555 | 5675904. 734 |
| M133T210   | 133. 0296116 | 210. 186 | 1344863. 774 |
| M133T321   | 133. 0281715 | 321. 198 | 14513388. 37 |
| M133T358   | 133. 0291013 | 357. 958 | 35531929     |
| M133T791   | 133. 0330767 | 790. 802 | 123668859    |
| M133T733   | 133. 0327089 | 732. 773 | 17673473. 56 |
| M133T151   | 133. 0308913 | 151. 016 | 162910459. 1 |
| M133T206   | 133. 0498996 | 205. 903 | 34146483. 45 |
| M133T290   | 133. 0498089 | 289. 912 | 43767419. 23 |
| M133T106_2 | 133. 0490778 | 105. 503 | 30095263. 76 |
| M133T129   | 133. 0498997 | 129. 234 | 63968799. 53 |
| M133T181   | 133. 0499206 | 181. 154 | 20563578. 87 |
| M133T143   | 133. 0498959 | 142. 85  | 63524799. 93 |
| M133T620   | 133. 0489971 | 620. 172 | 3017031. 184 |
| M133T121   | 133. 0502487 | 120. 525 | 120590746. 7 |
| M133T672   | 133. 0490782 | 671. 649 | 2204122. 554 |
| M133T172   | 133. 0489248 | 171. 935 | 15706777. 1  |
| M133T99    | 133. 0601079 | 98. 9918 | 108686449. 9 |
| M133T87    | 133. 0591242 | 86. 6643 | 4295519780   |
| M133T418   | 133. 0645438 | 417. 676 | 5556500. 711 |
| M133T433   | 133. 0645626 | 433. 111 | 6222526. 698 |
| M133T155   | 133. 0603285 | 155. 197 | 7734292. 749 |
| M133T351   | 133. 0756412 | 351. 348 | 2849156. 031 |
| M133T211   | 133. 0754758 | 211. 288 | 5735009. 554 |
| M133T327   | 133. 0757602 | 326. 78  | 14462064     |
| M133T493   | 133. 0865828 | 492. 895 | 14156512. 59 |
| M133T469   | 133. 0865437 | 469. 252 | 16593209. 15 |
| M133T232   | 133. 0863923 | 231. 773 | 120534919. 4 |
| M133T67    | 133. 0854845 | 66. 9841 | 54307737. 29 |
| M133T80    | 133. 0963236 | 79. 643  | 343387327. 1 |
| M133T435   | 133. 1008179 | 434. 589 | 12922197. 66 |
| M133T223   | 133. 104539  | 223. 474 | 249446238. 7 |
| M133T669   | 133. 0997174 | 668. 867 | 14289555. 23 |
| M133T649   | 133. 1001243 | 649. 338 | 15496216. 23 |
| M133T682   | 133. 1000515 | 681. 885 | 13805586. 31 |
| M133T246   | 133. 1042911 | 246. 372 | 472195122. 5 |
| M133T562   | 133. 1001961 | 561. 955 | 74106650. 31 |
| M133T719   | 133. 1008382 | 719. 215 | 9271796. 884 |
| M133T703   | 133. 0999218 | 703. 35  | 21348745. 2  |
| M133T545   | 133. 1002113 | 545. 203 | 25489925. 67 |
| M133T276   | 133. 1043043 | 276. 414 | 7215707. 731 |
| M133T694   | 133. 1000245 | 693. 81  | 9512741. 408 |
| M133T284   | 133. 10421   | 284. 377 | 4011445. 847 |
| M133T576   | 133. 1001145 | 575. 878 | 11093686. 07 |
| M134T829   | 133. 5315031 | 828. 73  | 12362342. 16 |

|            |              |          |              |
|------------|--------------|----------|--------------|
| M134T836   | 133. 5308676 | 836. 034 | 8062850. 36  |
| M134T806   | 133. 5302904 | 805. 823 | 73727650. 85 |
| M134T781   | 133. 5302748 | 781. 303 | 20676905. 02 |
| M134T230_1 | 133. 5837218 | 230. 321 | 84850617. 08 |
| M134T128   | 133. 5838124 | 127. 944 | 40586446. 6  |
| M134T173   | 133. 5835943 | 173. 407 | 29836619. 91 |
| M134T46    | 133. 9735096 | 46. 447  | 3813300. 911 |
| M134T68    | 133. 9734547 | 68. 0903 | 1109516. 13  |
| M134T88    | 134. 0443182 | 87. 6739 | 995608720. 5 |
| M134T201   | 134. 044335  | 200. 766 | 1785670. 193 |
| M134T321   | 134. 0445809 | 321. 198 | 8717705. 3   |
| M134T148   | 134. 0443988 | 148. 117 | 5679936. 777 |
| M134T435   | 134. 0605229 | 434. 589 | 3236587. 413 |
| M134T415   | 134. 0606572 | 414. 82  | 4979715. 251 |
| M134T504   | 134. 0596523 | 504. 466 | 3591035. 192 |
| M134T528   | 134. 0599331 | 528. 185 | 4825148. 178 |
| M134T230_2 | 134. 0856845 | 230. 321 | 10400479. 01 |
| M134T103   | 134. 0807391 | 103. 423 | 75399795. 2  |
| M134T92    | 134. 0807604 | 91. 7174 | 129521369. 7 |
| M134T318   | 134. 0814883 | 318. 497 | 17750563. 23 |
| M134T80    | 134. 0999103 | 79. 643  | 18184474. 93 |
| M134T223   | 134. 1061949 | 223. 474 | 18791638. 43 |
| M134T248   | 134. 1062193 | 247. 692 | 34782443. 07 |
| M134T101   | 134. 1171382 | 101. 161 | 39772965. 1  |
| M135T175   | 134. 5334402 | 174. 865 | 28751993. 62 |
| M135T317   | 134. 5832759 | 317. 199 | 2522041. 857 |
| M135T216   | 135. 0249682 | 216. 359 | 11843218. 49 |
| M135T272   | 135. 0256064 | 272. 304 | 5794846. 921 |
| M135T260   | 135. 0256723 | 259. 74  | 2984544. 41  |
| M135T294   | 135. 0436992 | 293. 896 | 4491411. 576 |
| M135T472_1 | 135. 0448001 | 472. 132 | 10623479. 76 |
| M135T389   | 135. 0438751 | 389. 035 | 4499471. 361 |
| M135T320   | 135. 0437232 | 319. 758 | 6690157. 215 |
| M135T423   | 135. 0437585 | 423. 199 | 6411477. 762 |
| M135T335   | 135. 055105  | 334. 966 | 3919336. 832 |
| M135T88    | 135. 0492189 | 87. 6739 | 23103961. 92 |
| M135T171   | 135. 0548675 | 170. 665 | 1974078. 332 |
| M135T87    | 135. 0646108 | 86. 6643 | 26035033. 57 |
| M135T94    | 135. 0645387 | 93. 7378 | 19417041. 12 |
| M135T65    | 135. 0646673 | 64. 6213 | 15448231. 58 |
| M135T810   | 135. 0800654 | 810. 052 | 4743502. 44  |
| M135T791   | 135. 1156379 | 790. 802 | 8076849. 705 |
| M135T519   | 135. 1172677 | 519. 257 | 33364421. 06 |
| M135T605   | 135. 115584  | 605. 264 | 8001137. 96  |
| M135T416   | 135. 117117  | 416. 239 | 11793064. 92 |
| M135T669   | 135. 1170717 | 668. 867 | 16816239. 07 |
| M135T649   | 135. 1172649 | 649. 338 | 30333105. 78 |
| M135T451   | 135. 1172715 | 450. 503 | 39144372. 33 |
| M135T472_2 | 135. 117255  | 472. 132 | 35641764. 03 |
| M135T682   | 135. 115591  | 681. 885 | 12185533. 23 |
| M135T613   | 135. 1156872 | 612. 699 | 8169512. 444 |
| M135T535   | 135. 117357  | 535. 329 | 45716537. 77 |
| M135T461   | 135. 1171765 | 460. 537 | 27850261. 77 |
| M135T784   | 135. 115706  | 783. 78  | 4144434. 092 |

|          |              |          |              |
|----------|--------------|----------|--------------|
| M135T620 | 135. 1171312 | 620. 172 | 10289495. 82 |
| M135T562 | 135. 1171209 | 561. 955 | 68330112. 1  |
| M135T739 | 135. 1170089 | 738. 697 | 15292747. 19 |
| M135T814 | 135. 1169206 | 814. 095 | 17162748. 85 |
| M135T718 | 135. 1156303 | 717. 959 | 11212954. 94 |
| M135T703 | 135. 1170644 | 703. 35  | 26130994. 06 |
| M135T507 | 135. 117105  | 507. 343 | 17369168. 37 |
| M135T545 | 135. 1154234 | 545. 203 | 30952038. 43 |
| M135T768 | 135. 1170757 | 768. 166 | 11656640. 53 |
| M135T632 | 135. 1156902 | 631. 982 | 13211740. 69 |
| M135T694 | 135. 1170847 | 693. 81  | 10216730. 46 |
| M135T576 | 135. 1157359 | 575. 878 | 17248711. 39 |
| M135T588 | 135. 1170779 | 587. 521 | 17418703. 95 |
| M136T135 | 135. 944972  | 134. 574 | 5318615. 27  |
| M136T69  | 135. 9449874 | 69. 2834 | 9740514. 753 |
| M136T767 | 136. 0218447 | 766. 742 | 20466199. 89 |
| M136T662 | 136. 0218333 | 661. 979 | 11784624. 99 |
| M136T702 | 136. 0218317 | 702. 055 | 11428047. 55 |
| M136T836 | 136. 0217475 | 836. 034 | 20603093. 33 |
| M136T670 | 136. 0219602 | 670. 166 | 15090685. 54 |
| M136T695 | 136. 0217932 | 695. 155 | 14221336. 73 |
| M136T685 | 136. 0218403 | 684. 985 | 18211030. 63 |
| M136T795 | 136. 0217382 | 795. 165 | 24974205. 19 |
| M136T712 | 136. 0218744 | 711. 984 | 17450231. 09 |
| M136T677 | 136. 0218944 | 677. 376 | 12085806. 29 |
| M136T757 | 136. 0217954 | 757. 001 | 17220089. 45 |
| M136T734 | 136. 0217646 | 734. 269 | 18511662. 26 |
| M136T744 | 136. 0217643 | 744. 182 | 17519065. 15 |
| M136T722 | 136. 0218507 | 722. 193 | 20124912. 94 |
| M136T817 | 136. 0218384 | 816. 953 | 13605967. 1  |
| M136T290 | 136. 0621992 | 289. 912 | 279941944. 5 |
| M136T106 | 136. 0622081 | 105. 503 | 1016074526   |
| M136T388 | 136. 0622877 | 387. 763 | 13194747. 28 |
| M136T676 | 136. 0614412 | 675. 866 | 12773081. 6  |
| M136T143 | 136. 0620613 | 142. 85  | 537827144. 8 |
| M136T121 | 136. 0622223 | 120. 525 | 202568447. 5 |
| M136T301 | 136. 0622882 | 300. 782 | 48452930. 27 |
| M136T87  | 136. 0731312 | 86. 6643 | 4801231. 875 |
| M136T399 | 136. 0754074 | 399. 046 | 9838676. 052 |
| M136T286 | 136. 0746954 | 285. 9   | 11080987. 26 |
| M136T594 | 136. 0761815 | 593. 62  | 11087809. 43 |
| M136T465 | 136. 076169  | 464. 668 | 10823836. 4  |
| M136T509 | 136. 0759301 | 508. 883 | 14843321. 87 |
| M136T218 | 136. 0759372 | 217. 866 | 191990821. 2 |
| M136T549 | 136. 0752366 | 549. 375 | 23150253. 12 |
| M136T484 | 136. 0759329 | 483. 973 | 16360473. 91 |
| M136T403 | 136. 1118203 | 403. 447 | 3615260. 609 |
| M136T535 | 136. 1199771 | 535. 329 | 5393771. 448 |
| M137T161 | 136. 5070901 | 161. 494 | 4479539. 168 |
| M137T168 | 136. 5070613 | 167. 804 | 9184513. 493 |
| M137T394 | 136. 5424433 | 393. 934 | 2982420. 427 |
| M137T230 | 136. 9527162 | 230. 321 | 5997896. 862 |
| M137T183 | 136. 9527419 | 182. 574 | 1977770. 366 |
| M137T239 | 136. 9527471 | 238. 605 | 6191044. 186 |

|            |             |         |             |
|------------|-------------|---------|-------------|
| M137T210   | 136.9527482 | 210.186 | 3283442.441 |
| M137T69    | 136.9529647 | 69.2834 | 11688161.27 |
| M137T275   | 136.9528019 | 274.968 | 21487822.77 |
| M137T195   | 136.9527365 | 195.23  | 4477196.382 |
| M137T219   | 136.952754  | 219.233 | 7391691.958 |
| M137T118_1 | 137.0229806 | 118.116 | 47352517.88 |
| M137T794   | 137.0377771 | 793.649 | 27193689.35 |
| M137T830   | 137.0376588 | 830.193 | 6719323.208 |
| M137T804   | 137.0370953 | 804.327 | 24768599.11 |
| M137T770   | 137.0380363 | 769.702 | 42532943.66 |
| M137T758   | 137.0378475 | 758.236 | 20860372.44 |
| M137T734   | 137.0370886 | 734.269 | 19878258.88 |
| M137T783   | 137.0378675 | 782.558 | 29607831.7  |
| M137T164   | 137.0453229 | 163.846 | 179660085.4 |
| M137T61    | 137.0452679 | 61.1538 | 3923589.807 |
| M137T314   | 137.0453943 | 314.259 | 2710926.817 |
| M137T302   | 137.0464161 | 302.191 | 47231354.64 |
| M137T791   | 137.05994   | 790.802 | 79741676.81 |
| M137T810   | 137.0594348 | 810.052 | 33299459.92 |
| M137T290   | 137.064672  | 289.912 | 14444871.39 |
| M137T122   | 137.0646392 | 122.007 | 11319294.54 |
| M137T764   | 137.0598713 | 763.856 | 222950547.7 |
| M137T626   | 137.059861  | 626.042 | 26596525.95 |
| M137T106   | 137.0647655 | 105.503 | 48802094.96 |
| M137T350   | 137.0601496 | 349.911 | 22980882.62 |
| M137T833   | 137.0603318 | 833.029 | 63645628.29 |
| M137T673   | 137.0584845 | 672.956 | 42940768.16 |
| M137T613   | 137.0600283 | 612.699 | 22718462.17 |
| M137T777   | 137.0598842 | 777.245 | 570213472.5 |
| M137T753_1 | 137.0599444 | 752.541 | 159899227   |
| M137T528   | 137.0599251 | 528.185 | 31508287.1  |
| M137T652   | 137.0599378 | 651.956 | 32081780.04 |
| M137T583   | 137.0600157 | 583.068 | 25498608.44 |
| M137T635   | 137.0599846 | 635.022 | 26216191.8  |
| M137T38    | 137.0703819 | 38.3208 | 2585408.118 |
| M137T306   | 137.0706564 | 306.247 | 5429178.899 |
| M137T388   | 137.0705425 | 387.763 | 4909618.48  |
| M137T502   | 137.0706477 | 501.549 | 3510222.219 |
| M137T218   | 137.0788855 | 217.866 | 14456013.66 |
| M137T496   | 137.095882  | 495.779 | 4961471.68  |
| M137T41    | 137.0956814 | 40.6031 | 6212320.637 |
| M137T343_1 | 137.1070189 | 343.226 | 6239827.203 |
| M137T244   | 137.1068176 | 244.085 | 3474101.696 |
| M137T278   | 137.1067744 | 277.699 | 3860411.026 |
| M137T107   | 137.1067244 | 106.513 | 4332857.309 |
| M137T600   | 137.1325801 | 599.621 | 14774669.48 |
| M137T746   | 137.1325667 | 745.603 | 13487981.63 |
| M137T435   | 137.1326525 | 434.589 | 17638640.87 |
| M137T788   | 137.1325986 | 787.856 | 31683850.91 |
| M137T807   | 137.1326155 | 807.232 | 7356747.239 |
| M137T563   | 137.1317061 | 563.297 | 25825866.12 |
| M137T814   | 137.1325815 | 814.095 | 12646695.17 |
| M137T190   | 137.1326423 | 189.571 | 15070114.9  |
| M137T574   | 137.1326307 | 574.363 | 12668864.66 |

|            |              |          |              |
|------------|--------------|----------|--------------|
| M137T325   | 137. 1325417 | 325. 35  | 32313524. 54 |
| M137T668   | 137. 1326794 | 667. 609 | 18064650. 01 |
| M137T649   | 137. 1326698 | 649. 338 | 28241029. 63 |
| M137T420   | 137. 1326713 | 420. 274 | 13691042. 69 |
| M137T753_2 | 137. 1325596 | 752. 541 | 14372210. 46 |
| M137T399   | 137. 1326193 | 399. 046 | 15420818. 07 |
| M137T412   | 137. 1326191 | 411. 838 | 10603542. 97 |
| M137T199   | 137. 1326755 | 199. 43  | 24087038. 76 |
| M137T702   | 137. 1326114 | 702. 055 | 19325838. 62 |
| M137T343_2 | 137. 1325968 | 343. 226 | 8416134. 233 |
| M137T544   | 137. 1326566 | 544. 056 | 22979700. 98 |
| M137T250   | 137. 1325413 | 250. 144 | 17679933. 75 |
| M137T478   | 137. 1326039 | 477. 989 | 11365826. 77 |
| M137T510   | 137. 1325939 | 510. 333 | 9129702. 16  |
| M137T692   | 137. 1325753 | 692. 461 | 13918804. 6  |
| M137T838   | 137. 1325874 | 837. 524 | 8189004. 226 |
| M137T445   | 137. 132687  | 444. 725 | 9089057. 841 |
| M137T530   | 137. 1326619 | 529. 713 | 22862485. 18 |
| M137T679   | 137. 132507  | 678. 909 | 23500675. 24 |
| M137T361   | 137. 1325754 | 360. 794 | 13377880. 03 |
| M137T237   | 137. 1326436 | 237. 171 | 29179048. 19 |
| M137T175   | 137. 1325237 | 174. 865 | 16245853. 07 |
| M137T222   | 137. 1325623 | 222. 017 | 37558883. 39 |
| M137T452   | 137. 1327528 | 451. 804 | 11125479. 79 |
| M137T270   | 137. 1327568 | 269. 528 | 27221383. 94 |
| M137T283   | 137. 1327733 | 282. 886 | 20690676. 38 |
| M137T500   | 137. 1327291 | 500. 045 | 16744475. 89 |
| M137T260   | 137. 1327126 | 259. 74  | 25646577. 34 |
| M137T765   | 137. 1327146 | 765. 406 | 13823254. 67 |
| M137T488   | 137. 132824  | 488. 437 | 11737569. 89 |
| M137T381   | 137. 1326932 | 380. 63  | 23538860. 59 |
| M137T716   | 137. 1327355 | 716. 403 | 23419757. 94 |
| M137T463   | 137. 1327581 | 463. 271 | 15160513. 52 |
| M137T629   | 137. 1327568 | 629. 015 | 34442878. 55 |
| M137T118_2 | 137. 132745  | 118. 116 | 58197609. 12 |
| M137T209   | 137. 1328063 | 208. 905 | 16471675. 44 |
| M137T589   | 137. 1327807 | 589. 053 | 13481475. 96 |
| M137T826   | 137. 1327585 | 825. 74  | 12583073. 34 |
| M137T148   | 137. 132784  | 148. 117 | 44189054. 49 |
| M138T761   | 137. 5374478 | 760. 916 | 2914121. 457 |
| M138T135   | 137. 9864903 | 134. 574 | 28666955. 81 |
| M138T63    | 137. 9866508 | 63. 4448 | 49856941. 46 |
| M138T167   | 138. 053697  | 166. 613 | 22302618. 18 |
| M138T97    | 138. 0531596 | 96. 7698 | 2345803192   |
| M138T463   | 138. 0551237 | 463. 271 | 36032872. 15 |
| M138T443   | 138. 0551599 | 443. 256 | 23361509. 93 |
| M138T672   | 138. 0624685 | 671. 649 | 5472084. 494 |
| M138T191   | 138. 0554777 | 190. 962 | 32791752. 17 |
| M138T791   | 138. 0627738 | 790. 802 | 6900091. 723 |
| M138T540   | 138. 0627952 | 539. 764 | 858948. 2989 |
| M138T764   | 138. 0627834 | 763. 856 | 18118913. 25 |
| M138T833   | 138. 0639557 | 833. 029 | 7821196. 806 |
| M138T777   | 138. 0627433 | 777. 245 | 49912034. 07 |
| M138T528   | 138. 0628175 | 528. 185 | 2593664. 786 |

|            |             |         |             |
|------------|-------------|---------|-------------|
| M138T439   | 138.091818  | 439.021 | 7209034.694 |
| M138T78    | 138.0890829 | 78.3841 | 39928359.85 |
| M138T577   | 138.0910248 | 577.366 | 11089022.02 |
| M138T338   | 138.0909867 | 337.767 | 24811454.94 |
| M138T245   | 138.0908723 | 245.199 | 110467499.2 |
| M138T354   | 138.0917231 | 353.978 | 15440013.05 |
| M138T355   | 138.1023627 | 355.41  | 5763876.106 |
| M139T78    | 138.588204  | 78.3841 | 1000858.661 |
| M139T137   | 138.985731  | 137.373 | 13661777.54 |
| M139T68    | 138.9854846 | 68.0903 | 18398412.99 |
| M139T33    | 138.9949712 | 33.467  | 19907324.05 |
| M139T308   | 139.002001  | 307.735 | 2118269.306 |
| M139T163   | 139.0021853 | 162.728 | 414933374.3 |
| M139T328   | 139.0022498 | 328.106 | 3720534.696 |
| M139T252   | 139.0020735 | 251.555 | 12970493.53 |
| M139T198   | 139.0021676 | 198.072 | 68520959.44 |
| M139T456_1 | 139.0165487 | 456.126 | 140038363.6 |
| M139T579   | 139.0173284 | 578.816 | 174273992.7 |
| M139T809   | 139.0168842 | 808.678 | 31712923.76 |
| M139T36    | 139.0173402 | 35.8675 | 174934102.7 |
| M139T519   | 139.0167031 | 519.257 | 166501878.1 |
| M139T540   | 139.0182101 | 539.764 | 191278363.1 |
| M139T411   | 139.0167786 | 410.542 | 167656929.1 |
| M139T432   | 139.0165586 | 431.64  | 157194266.9 |
| M139T639   | 139.0182501 | 639.219 | 370309047.8 |
| M139T605   | 139.0167106 | 605.264 | 465105736.3 |
| M139T74    | 139.0185263 | 73.8324 | 80705819.88 |
| M139T399   | 139.0182836 | 399.046 | 173109505.1 |
| M139T616   | 139.0182387 | 615.594 | 231112589.8 |
| M139T770   | 139.0167968 | 769.702 | 110524044   |
| M139T824   | 139.0167965 | 824.311 | 12275289.82 |
| M139T499   | 139.0165738 | 498.645 | 187765061.3 |
| M139T724   | 139.0177266 | 723.682 | 636988834.3 |
| M139T833   | 139.016807  | 833.029 | 3819479.846 |
| M139T795   | 139.0168712 | 795.165 | 53799113.39 |
| M139T478   | 139.0166313 | 477.989 | 157644725.1 |
| M139T488   | 139.0166714 | 488.437 | 182077291.5 |
| M139T468   | 139.0166046 | 467.706 | 145752975.6 |
| M139T509_1 | 139.01654   | 508.883 | 190142957.5 |
| M139T570   | 139.0182721 | 570.01  | 174407516.4 |
| M139T528   | 139.0165643 | 528.185 | 187889787.4 |
| M139T690   | 139.0167577 | 689.5   | 866873744.7 |
| M139T551   | 139.0182417 | 550.919 | 215569644.2 |
| M139T423   | 139.0165229 | 423.199 | 124211494.4 |
| M139T365   | 139.0173564 | 365.061 | 163337147.4 |
| M139T384   | 139.0182662 | 383.536 | 227551707.8 |
| M139T448   | 139.0173206 | 447.531 | 160867136.6 |
| M139T783   | 139.017325  | 782.558 | 57760380.4  |
| M139T100   | 139.0385433 | 100.146 | 23251175.92 |
| M139T106   | 139.0391158 | 105.503 | 48892103.28 |
| M139T309   | 139.039081  | 308.967 | 29885880.68 |
| M139T126   | 139.0390864 | 125.598 | 52245709.25 |
| M139T293   | 139.0383915 | 292.623 | 22433586.16 |
| M139T325   | 139.0390987 | 325.35  | 22423624.42 |

|            |             |         |             |
|------------|-------------|---------|-------------|
| M139T283   | 139.0391387 | 282.886 | 18114837.17 |
| M139T143   | 139.0384394 | 142.85  | 32763157.17 |
| M139T67    | 139.0385269 | 66.9841 | 8257801.051 |
| M139T111   | 139.0497857 | 111.382 | 5693500.603 |
| M139T201   | 139.0498019 | 200.766 | 8620124.785 |
| M139T188   | 139.0497287 | 188.126 | 6830394.281 |
| M139T97    | 139.0579481 | 96.7698 | 163063487.3 |
| M139T456_2 | 139.0744436 | 456.126 | 17044467.46 |
| M139T509_2 | 139.0743383 | 508.883 | 7473059.665 |
| M139T342   | 139.0750127 | 341.802 | 6249494.37  |
| M139T375   | 139.0861686 | 375.021 | 31793020.69 |
| M139T436   | 139.0862263 | 436.069 | 4275486.103 |
| M139T98    | 139.0860144 | 97.7824 | 10532263.02 |
| M139T395   | 139.0862192 | 395.264 | 3151930.301 |
| M139T422   | 139.0863387 | 421.784 | 5971512.686 |
| M139T313   | 139.0861234 | 312.85  | 3299094.244 |
| M139T246   | 139.0942425 | 246.372 | 7405812.847 |
| M139T719   | 139.1120022 | 719.215 | 28170698.17 |
| M139T378   | 139.1226342 | 377.704 | 5386350.584 |
| M140T81    | 139.9140001 | 80.824  | 13155977.69 |
| M140T282   | 139.9626787 | 281.666 | 4295491.113 |
| M140T139   | 139.9628638 | 138.766 | 3088597.166 |
| M140T272   | 139.980706  | 272.304 | 535809786.9 |
| M140T137   | 139.9825988 | 137.373 | 168285652.8 |
| M140T63    | 139.9814628 | 63.4448 | 507149943.1 |
| M140T152   | 139.9818548 | 152.375 | 124749561   |
| M140T316   | 139.9818542 | 315.701 | 90402740.4  |
| M140T195   | 139.9823866 | 195.23  | 420632813.7 |
| M140T45_1  | 139.9814407 | 45.3435 | 513290822.8 |
| M140T788   | 139.9884598 | 787.856 | 93555332.82 |
| M140T813   | 139.9876153 | 812.862 | 66850596.34 |
| M140T728   | 139.9883932 | 728.25  | 107929001.2 |
| M140T765   | 139.9873509 | 765.406 | 91166814.55 |
| M140T777   | 139.987606  | 777.245 | 130775806.5 |
| M140T832   | 139.9873539 | 831.709 | 52537353.51 |
| M140T756   | 139.9869681 | 755.537 | 114217568.2 |
| M140T821   | 139.9873425 | 821.334 | 65645235.08 |
| M140T798   | 139.987634  | 797.773 | 94612844.09 |
| M140T453   | 140.0014117 | 453.317 | 999981.6294 |
| M140T121   | 140.0041857 | 120.525 | 11515787.68 |
| M140T113   | 140.0041486 | 112.781 | 4327133.531 |
| M140T131   | 140.0014286 | 130.668 | 1690143.171 |
| M140T45_2  | 140.0012984 | 45.3435 | 1194873.961 |
| M140T163   | 140.0055601 | 162.728 | 23928964.28 |
| M140T91    | 140.0101635 | 90.7088 | 35097684.49 |
| M140T36    | 140.020771  | 35.8675 | 6941656.674 |
| M140T698   | 140.0226293 | 697.952 | 3076314.371 |
| M140T50    | 140.0207093 | 50.041  | 1221536.064 |
| M140T169   | 140.0331992 | 169.221 | 1187999051  |
| M140T221   | 140.0333219 | 220.676 | 44774593.6  |
| M140T143   | 140.0332168 | 142.85  | 20390932.49 |
| M140T253   | 140.03449   | 253.024 | 27541810.8  |
| M140T446_1 | 140.0344831 | 445.984 | 20275170.23 |
| M140T177   | 140.0333691 | 177.295 | 978562139.4 |



|            |             |         |             |
|------------|-------------|---------|-------------|
| M140T236   | 140.0344646 | 235.734 | 49913970.74 |
| M140T299   | 140.0333104 | 299.493 | 17385322.3  |
| M140T124   | 140.04218   | 124.487 | 3321688.759 |
| M140T97    | 140.0590839 | 96.7698 | 9736884.029 |
| M140T103   | 140.0706222 | 103.423 | 150791379.2 |
| M140T522   | 140.0713542 | 522.177 | 17893758.84 |
| M140T165   | 140.0706871 | 165.217 | 61246500.64 |
| M140T446_2 | 140.0714676 | 445.984 | 33586559.76 |
| M140T485   | 140.0707864 | 485.471 | 14413217.09 |
| M140T150   | 140.0708408 | 149.65  | 89712550.97 |
| M140T295   | 140.070827  | 295.356 | 22912563.55 |
| M140T507   | 140.0706821 | 507.343 | 18387895.19 |
| M140T198   | 140.0708481 | 198.072 | 55208947.21 |
| M140T456   | 140.0788999 | 456.126 | 754699.4131 |
| M140T580   | 140.1070563 | 580.22  | 47904969.9  |
| M141T211   | 140.5333335 | 211.288 | 6240522.977 |
| M141T66    | 140.9509108 | 65.7101 | 7757881.335 |
| M141T35    | 140.9508882 | 34.5397 | 7043953.64  |
| M141T45_1  | 140.9508824 | 45.3435 | 12337602.78 |
| M141T60    | 140.9611942 | 59.9075 | 5863085.641 |
| M141T51    | 140.9611687 | 51.1942 | 3753293.04  |
| M141T75    | 140.9612633 | 74.9588 | 37512469.63 |
| M141T31    | 140.9618154 | 31.4047 | 11296579.97 |
| M141T43_1  | 140.9611993 | 43.0471 | 2135197.61  |
| M141T252   | 140.9839662 | 251.555 | 8757091.599 |
| M141T63_1  | 140.9814506 | 63.4448 | 33556664.4  |
| M141T133   | 140.9816702 | 133.259 | 9174239.726 |
| M141T45_2  | 140.981472  | 45.3435 | 32745685.22 |
| M141T777_1 | 140.9907524 | 777.245 | 4586129.092 |
| M141T32    | 140.9956985 | 32.4171 | 5922023.964 |
| M141T403   | 141.0097241 | 403.447 | 2602101.678 |
| M141T670   | 141.0176518 | 670.166 | 7243475.084 |
| M141T321   | 141.0160466 | 321.198 | 11725216.03 |
| M141T230   | 141.0177712 | 230.321 | 12797286.72 |
| M141T69_1  | 141.0178201 | 69.2834 | 4002574.004 |
| M141T216   | 141.0177643 | 216.359 | 9348168.551 |
| M141T45_3  | 141.0178068 | 45.3435 | 9292313.166 |
| M141T169   | 141.0370838 | 169.221 | 85470139.78 |
| M141T177   | 141.0370483 | 177.295 | 45169907.56 |
| M141T158   | 141.0541388 | 157.773 | 11124281.55 |
| M141T74    | 141.0505825 | 73.8324 | 853446763   |
| M141T129   | 141.0506714 | 129.234 | 2099443.068 |
| M141T408   | 141.0549968 | 407.724 | 13744097.69 |
| M141T334   | 141.0545165 | 333.715 | 6196629.73  |
| M141T63_2  | 141.0541088 | 63.4448 | 8306226.28  |
| M141T171   | 141.0541431 | 170.665 | 5792033.816 |
| M141T50    | 141.0540713 | 50.041  | 11538446.32 |
| M141T301   | 141.0506986 | 300.782 | 5200878.143 |
| M141T148   | 141.0542192 | 148.117 | 11420767.83 |
| M141T107   | 141.0539698 | 106.513 | 34797724.8  |
| M141T139   | 141.0654415 | 138.766 | 1889994.33  |
| M141T106   | 141.0653801 | 105.503 | 9882147.234 |
| M141T132   | 141.0654433 | 131.949 | 4646859.289 |
| M141T121   | 141.0654265 | 120.525 | 4286187.011 |

|            |             |         |             |
|------------|-------------|---------|-------------|
| M141T43_2  | 141.065215  | 43.0471 | 5162446.843 |
| M141T91    | 141.0652138 | 90.7088 | 7667035.419 |
| M141T445   | 141.0736649 | 444.725 | 2604153.663 |
| M141T419   | 141.0912186 | 418.97  | 8204420.954 |
| M141T834   | 141.0904208 | 834.486 | 4147181.029 |
| M141T69_2  | 141.0905187 | 69.2834 | 6295578.456 |
| M141T482   | 141.0907359 | 482.436 | 10425919.9  |
| M141T580   | 141.1100354 | 580.22  | 3123543.196 |
| M141T506   | 141.1268212 | 505.855 | 3691187.189 |
| M141T777_2 | 141.1267711 | 777.245 | 17610389.61 |
| M142T104   | 141.5812402 | 104.493 | 14510858.15 |
| M142T187   | 141.9572805 | 186.709 | 75667466.37 |
| M142T78    | 141.9581699 | 78.3841 | 116216650.9 |
| M142T137   | 141.9585612 | 137.373 | 77607126.09 |
| M142T271   | 141.9579271 | 270.983 | 508369896.9 |
| M142T171   | 141.9573019 | 170.665 | 34991519.49 |
| M142T70    | 141.9581791 | 70.3428 | 186104318.5 |
| M142T51    | 141.9581562 | 51.1942 | 388775689.5 |
| M142T113   | 141.9582381 | 112.781 | 45648351.57 |
| M142T198   | 141.9590736 | 198.072 | 61740292.27 |
| M142T148   | 141.9581972 | 148.117 | 107156608.6 |
| M142T219   | 141.9581695 | 219.233 | 79037183.42 |
| M142T833   | 141.9834228 | 833.029 | 16328895.2  |
| M142T765   | 141.9834301 | 765.406 | 35614406.2  |
| M142T814   | 141.9834237 | 814.095 | 27039532.38 |
| M142T777   | 141.9834216 | 777.245 | 49221084.21 |
| M142T756   | 141.9834084 | 755.537 | 34979827.9  |
| M142T62    | 141.9784487 | 62.1777 | 38648679.68 |
| M142T133   | 141.978653  | 133.259 | 10909881.41 |
| M142T798   | 141.9829639 | 797.773 | 40693883.72 |
| M142T823   | 141.9834294 | 822.881 | 23164292.55 |
| M142T744   | 141.9832991 | 744.182 | 8655745.526 |
| M142T45    | 141.9784617 | 45.3435 | 26221017.56 |
| M142T38    | 142.0334214 | 38.3208 | 8722337.954 |
| M142T61    | 142.0333886 | 61.1538 | 5689500.234 |
| M142T185   | 142.0333109 | 185.398 | 4617175.212 |
| M142T74_1  | 142.0344954 | 73.8324 | 50809400.32 |
| M142T249   | 142.0334499 | 248.895 | 13086738.89 |
| M142T152   | 142.0332972 | 152.375 | 10176942.28 |
| M142T341   | 142.0331794 | 340.548 | 30964746.19 |
| M142T321   | 142.0335294 | 321.198 | 33020662.46 |
| M142T266   | 142.0333639 | 265.624 | 14755274.62 |
| M142T74_2  | 142.0502682 | 73.8324 | 103057119.1 |
| M142T399   | 142.0499165 | 399.046 | 11335266.02 |
| M142T106   | 142.0494334 | 105.503 | 36773819.29 |
| M142T117   | 142.0499606 | 116.689 | 78339173.32 |
| M142T388   | 142.0495262 | 387.763 | 11028109.87 |
| M142T143   | 142.0500709 | 142.85  | 53912631.35 |
| M142T287   | 142.0493104 | 287.148 | 16239907.82 |
| M142T176   | 142.0493496 | 175.952 | 56057874.45 |
| M142T313   | 142.0498943 | 312.85  | 64928787.27 |
| M142T222   | 142.0499388 | 222.017 | 25034715.76 |
| M142T408   | 142.0576841 | 407.724 | 573013.2181 |
| M142T156   | 142.0732632 | 156.393 | 9484465.296 |

|            |              |          |              |
|------------|--------------|----------|--------------|
| M142T102   | 142. 0862539 | 102. 247 | 48007978. 03 |
| M142T374   | 142. 0863459 | 373. 532 | 25481440. 19 |
| M142T357   | 142. 0854293 | 356. 74  | 50900920. 19 |
| M142T37    | 142. 1221636 | 37. 1891 | 9286856. 409 |
| M142T203   | 142. 1222537 | 203. 36  | 8807485. 27  |
| M142T310   | 142. 1226864 | 310. 075 | 6763415. 837 |
| M142T584   | 142. 1223772 | 584. 417 | 6530000. 661 |
| M142T175   | 142. 1222368 | 174. 865 | 43230928. 39 |
| M142T324   | 142. 1224974 | 323. 984 | 5159245. 262 |
| M143T234   | 142. 5071043 | 234. 447 | 4228394. 892 |
| M143T258_1 | 142. 9589885 | 258. 489 | 2249224. 479 |
| M143T70    | 142. 9610949 | 70. 3428 | 6236766. 963 |
| M143T61    | 142. 9758009 | 61. 1538 | 5060278. 705 |
| M143T68    | 142. 9758012 | 68. 0903 | 2687081. 504 |
| M143T43    | 142. 9757526 | 43. 0471 | 10603042. 41 |
| M143T32    | 142. 9911008 | 32. 4171 | 2100699. 886 |
| M143T36_1  | 143. 0102216 | 35. 8675 | 3541668. 306 |
| M143T456   | 143. 0339548 | 456. 126 | 73823733     |
| M143T603   | 143. 0326158 | 602. 513 | 62631638. 08 |
| M143T746   | 143. 0326038 | 745. 603 | 57490054. 24 |
| M143T165   | 143. 032897  | 165. 217 | 65996897. 44 |
| M143T705   | 143. 0338539 | 704. 715 | 68578918. 56 |
| M143T158_1 | 143. 0328963 | 157. 773 | 135580936. 5 |
| M143T172   | 143. 0328228 | 171. 935 | 93055967. 27 |
| M143T147_1 | 143. 0327843 | 146. 742 | 118901713. 5 |
| M143T137   | 143. 0327602 | 137. 373 | 123007163. 3 |
| M143T810   | 143. 032622  | 810. 052 | 166634356. 1 |
| M143T180   | 143. 0329192 | 179. 75  | 89252590. 74 |
| M143T430   | 143. 0339513 | 430. 131 | 91356628. 92 |
| M143T660   | 143. 0325858 | 660. 455 | 82947698. 21 |
| M143T537   | 143. 0338644 | 536. 761 | 98685600. 59 |
| M143T129   | 143. 0327442 | 129. 234 | 103646655    |
| M143T419   | 143. 0339497 | 418. 97  | 175597451. 2 |
| M143T688   | 143. 0325807 | 687. 95  | 144031936. 2 |
| M143T481   | 143. 0339729 | 481. 042 | 109805806. 5 |
| M143T724   | 143. 0340076 | 723. 682 | 64367843. 24 |
| M143T246_1 | 143. 0327978 | 246. 372 | 206064713. 3 |
| M143T623   | 143. 0325964 | 623. 11  | 69276811. 92 |
| M143T350   | 143. 0339728 | 349. 911 | 99078617. 23 |
| M143T516   | 143. 0339613 | 516. 214 | 87911163. 41 |
| M143T552   | 143. 0326451 | 552. 452 | 81674519. 29 |
| M143T731   | 143. 0326658 | 731. 347 | 66047210. 84 |
| M143T121   | 143. 0327576 | 120. 525 | 123830984. 1 |
| M143T339   | 143. 0338954 | 339. 085 | 76013276. 49 |
| M143T258_2 | 143. 0327602 | 258. 489 | 124077027. 2 |
| M143T613   | 143. 0326024 | 612. 699 | 74161071. 5  |
| M143T331   | 143. 033826  | 330. 809 | 188218225. 3 |
| M143T111   | 143. 0339487 | 111. 382 | 154334890. 7 |
| M143T642   | 143. 0325907 | 642. 211 | 84731657. 03 |
| M143T586   | 143. 0325796 | 585. 968 | 101951001. 8 |
| M143T632   | 143. 0326635 | 631. 982 | 64891366. 86 |
| M143T652   | 143. 0326547 | 651. 956 | 45432255. 85 |
| M143T466   | 143. 0339037 | 466. 162 | 89539520. 42 |
| M143T359   | 143. 0326496 | 359. 32  | 87148633. 1  |

|            |              |          |              |
|------------|--------------|----------|--------------|
| M143T403_1 | 143. 0333486 | 403. 447 | 220683714. 5 |
| M143T298   | 143. 0327627 | 298. 135 | 162720543. 8 |
| M143T268   | 143. 0328366 | 268. 427 | 123682798. 3 |
| M143T195   | 143. 0327661 | 195. 23  | 202324126. 7 |
| M143T228   | 143. 0328699 | 227. 633 | 117066970. 1 |
| M143T713   | 143. 032585  | 713. 464 | 73365698. 76 |
| M143T280   | 143. 0328488 | 280. 345 | 133579939    |
| M143T448   | 143. 0339615 | 447. 531 | 84189771. 49 |
| M143T772   | 143. 0329028 | 772. 206 | 241815679. 8 |
| M143T502   | 143. 0339116 | 501. 549 | 114834018. 5 |
| M143T567   | 143. 0339018 | 567. 1   | 118111439. 1 |
| M143T379   | 143. 0338853 | 379. 194 | 193945777. 7 |
| M143T317   | 143. 0339072 | 317. 199 | 86345514. 3  |
| M143T36_2  | 143. 0394689 | 35. 8675 | 53907921. 39 |
| M143T52    | 143. 039743  | 52. 4521 | 23479589. 74 |
| M143T75    | 143. 0480372 | 74. 9588 | 124774516    |
| M143T69_1  | 143. 069818  | 69. 2834 | 7248219. 902 |
| M143T101   | 143. 0809728 | 101. 161 | 28883027. 27 |
| M143T95    | 143. 0810428 | 94. 7467 | 45794322. 43 |
| M143T230   | 143. 081013  | 230. 321 | 16986399. 77 |
| M143T147_2 | 143. 0811075 | 146. 742 | 9169576. 43  |
| M143T158_2 | 143. 0810481 | 157. 773 | 9380697. 712 |
| M143T246_2 | 143. 0811304 | 246. 372 | 19297361. 37 |
| M143T357   | 143. 089281  | 356. 74  | 3659930. 446 |
| M143T541   | 143. 1061511 | 541. 275 | 24800135. 64 |
| M143T420   | 143. 1069692 | 420. 274 | 31126974. 08 |
| M143T562   | 143. 1060387 | 561. 955 | 17427322. 25 |
| M143T69_2  | 143. 1062228 | 69. 2834 | 11358506. 57 |
| M143T530   | 143. 1068    | 529. 713 | 25828367. 34 |
| M143T551   | 143. 1068227 | 550. 919 | 18472481. 48 |
| M143T403_2 | 143. 1069563 | 403. 447 | 45370867. 31 |
| M143T659   | 143. 1062152 | 658. 953 | 17365795. 24 |
| M143T605   | 143. 1425143 | 605. 264 | 3870127. 132 |
| M143T524   | 143. 142726  | 523. 735 | 3345321. 437 |
| M143T584   | 143. 1426012 | 584. 417 | 3905027. 442 |
| M143T504   | 143. 1427434 | 504. 466 | 3612309. 301 |
| M144T329   | 143. 5146163 | 329. 481 | 1760825. 884 |
| M144T175   | 143. 5387819 | 174. 865 | 24810629. 47 |
| M144T32    | 143. 9589768 | 32. 4171 | 5572031. 458 |
| M144T777   | 143. 980446  | 777. 245 | 5520897. 092 |
| M144T137   | 143. 9966705 | 137. 373 | 44717464. 39 |
| M144T74    | 143. 9962677 | 73. 8324 | 584014515. 9 |
| M144T43    | 143. 996194  | 43. 0471 | 61286640. 62 |
| M144T299   | 143. 9960348 | 299. 493 | 34285613. 28 |
| M144T276   | 143. 9966955 | 276. 414 | 54433687. 81 |
| M144T148   | 143. 996415  | 148. 117 | 34371933. 01 |
| M144T272   | 144. 0306026 | 272. 304 | 2691354. 441 |
| M144T216   | 144. 0307069 | 216. 359 | 10076432. 12 |
| M144T402   | 144. 037015  | 401. 963 | 13761711. 61 |
| M144T384   | 144. 043894  | 383. 536 | 3050316. 403 |
| M144T369   | 144. 0649694 | 369. 321 | 31816233. 21 |
| M144T622   | 144. 0649766 | 621. 708 | 28092324. 99 |
| M144T705   | 144. 0649859 | 704. 715 | 27867963. 12 |
| M144T161   | 144. 0648916 | 161. 494 | 67515248. 58 |

|            |              |          |              |
|------------|--------------|----------|--------------|
| M144T411   | 144. 0653626 | 410. 542 | 29789407. 54 |
| M144T348   | 144. 0644454 | 348. 488 | 162598511. 1 |
| M144T558   | 144. 065341  | 557. 967 | 28085536. 12 |
| M144T252   | 144. 0653046 | 251. 555 | 26315609. 25 |
| M144T432   | 144. 0648655 | 431. 64  | 31118887. 02 |
| M144T566   | 144. 0648463 | 565. 79  | 16541922. 88 |
| M144T496   | 144. 0654574 | 495. 779 | 28106259. 25 |
| M144T388   | 144. 0649292 | 387. 763 | 21183719. 87 |
| M144T258   | 144. 0652668 | 258. 489 | 23833923. 79 |
| M144T813   | 144. 0649566 | 812. 862 | 54986427. 21 |
| M144T395   | 144. 0649957 | 395. 264 | 41176203. 18 |
| M144T647   | 144. 0649117 | 646. 794 | 46715583. 92 |
| M144T310   | 144. 0646238 | 310. 075 | 76451983. 58 |
| M144T733   | 144. 0649104 | 732. 773 | 25592047. 55 |
| M144T128   | 144. 0653648 | 127. 944 | 46665873     |
| M144T243   | 144. 0652535 | 242. 682 | 27108094. 94 |
| M144T282   | 144. 064862  | 281. 666 | 75769072. 56 |
| M144T740   | 144. 0649325 | 740. 014 | 18492486. 23 |
| M144T531   | 144. 065324  | 531. 127 | 79122005. 81 |
| M144T580   | 144. 0649561 | 580. 22  | 24126568. 99 |
| M144T145   | 144. 0652852 | 145. 382 | 63566724. 11 |
| M144T96    | 144. 0649267 | 95. 7572 | 463447075    |
| M144T446   | 144. 064855  | 445. 984 | 22869343. 87 |
| M144T683   | 144. 0649845 | 683. 436 | 45118288. 67 |
| M144T673   | 144. 0649699 | 672. 956 | 27753593. 44 |
| M144T485   | 144. 0653898 | 485. 471 | 18941050. 85 |
| M144T336   | 144. 0638587 | 336. 344 | 410511411. 5 |
| M144T422   | 144. 0653565 | 421. 784 | 28183770. 1  |
| M144T834   | 144. 0649043 | 834. 486 | 20280856. 05 |
| M144T378   | 144. 0649739 | 377. 704 | 32544996. 69 |
| M144T751   | 144. 0648938 | 751. 333 | 32381922. 51 |
| M144T197_1 | 144. 0653202 | 196. 644 | 112559252. 5 |
| M144T601   | 144. 0649164 | 601. 04  | 23090671. 1  |
| M144T295   | 144. 0648984 | 295. 356 | 48330455. 01 |
| M144T780   | 144. 0649707 | 780. 043 | 19882956. 17 |
| M144T591   | 144. 0649877 | 590. 607 | 23938751. 65 |
| M144T466   | 144. 065419  | 466. 162 | 31881808. 7  |
| M144T359   | 144. 0649073 | 359. 32  | 51853272. 1  |
| M144T611   | 144. 0649409 | 611. 145 | 21481402. 72 |
| M144T321   | 144. 0646575 | 321. 198 | 266995111. 7 |
| M144T772   | 144. 064983  | 772. 206 | 25054811. 05 |
| M144T713   | 144. 0649543 | 713. 464 | 25962615. 71 |
| M144T234   | 144. 0653764 | 234. 447 | 27037580. 52 |
| M144T761   | 144. 0649636 | 760. 916 | 20413590. 39 |
| M144T722   | 144. 0649633 | 722. 193 | 18966564. 94 |
| M144T792   | 144. 0649049 | 792. 146 | 27285729. 06 |
| M144T219   | 144. 0652738 | 219. 233 | 33265922. 15 |
| M144T430   | 144. 0799801 | 430. 131 | 24633776. 68 |
| M144T472   | 144. 0801132 | 472. 132 | 5754637. 499 |
| M144T458   | 144. 0806783 | 457. 576 | 9213313. 585 |
| M144T443   | 144. 0804623 | 443. 256 | 104143991. 2 |
| M144T256   | 144. 0762582 | 255. 723 | 564495. 2255 |
| M144T197_2 | 144. 0945608 | 196. 644 | 40623174. 14 |
| M144T102   | 144. 1009733 | 102. 247 | 615444393. 2 |

|            |              |          |              |
|------------|--------------|----------|--------------|
| M144T122   | 144. 1015284 | 122. 007 | 114085032. 5 |
| M144T293   | 144. 1011545 | 292. 623 | 19057880. 02 |
| M144T143   | 144. 1011618 | 142. 85  | 100934310. 4 |
| M144T172   | 144. 1010273 | 171. 935 | 289636288    |
| M144T93    | 144. 1015552 | 92. 7272 | 11324391. 38 |
| M144T111   | 144. 1014859 | 111. 382 | 127141896. 5 |
| M144T236   | 144. 1012912 | 235. 734 | 33048997. 7  |
| M144T283   | 144. 1128391 | 282. 886 | 42756060. 42 |
| M144T306   | 144. 1117558 | 306. 247 | 19922473. 08 |
| M144T405   | 144. 1096373 | 404. 872 | 3706235. 289 |
| M144T210   | 144. 1126664 | 210. 186 | 66345609. 36 |
| M144T155   | 144. 1126482 | 155. 197 | 66957251. 82 |
| M144T108   | 144. 112736  | 107. 537 | 33147819. 88 |
| M144T516   | 144. 1378451 | 516. 214 | 12137239. 54 |
| M144T323   | 144. 1378449 | 322. 536 | 2135932. 074 |
| M144T697   | 144. 1378448 | 696. 575 | 16643830. 85 |
| M145T150   | 144. 5227086 | 149. 65  | 3905105. 626 |
| M145T358_1 | 144. 5359754 | 357. 958 | 34277476. 49 |
| M145T402   | 144. 5359851 | 401. 963 | 5106958. 416 |
| M145T110   | 144. 6048488 | 110. 047 | 18308926. 42 |
| M145T68    | 144. 9605645 | 68. 0903 | 6045518. 157 |
| M145T767   | 144. 9810454 | 766. 742 | 115308357. 5 |
| M145T748   | 144. 9810055 | 748. 486 | 130799105. 1 |
| M145T806   | 144. 9807812 | 805. 823 | 287117567. 8 |
| M145T824   | 144. 9810415 | 824. 311 | 438889658. 9 |
| M145T760   | 144. 9810505 | 759. 605 | 102934915. 7 |
| M145T712   | 144. 9812035 | 711. 984 | 107814642. 3 |
| M145T728   | 144. 9810511 | 728. 25  | 184230816. 8 |
| M145T838   | 144. 9810493 | 837. 524 | 136350734. 5 |
| M145T32    | 144. 9804299 | 32. 4171 | 150935838. 3 |
| M145T787   | 144. 9810458 | 786. 569 | 307416333. 1 |
| M145T66    | 144. 9814156 | 65. 7101 | 17582809. 15 |
| M145T37    | 145. 0352323 | 37. 1891 | 2348196. 743 |
| M145T77    | 145. 0346597 | 77. 2391 | 4745368. 154 |
| M145T403   | 145. 0368719 | 403. 447 | 3301992. 206 |
| M145T358_2 | 145. 0376106 | 357. 958 | 3824593. 245 |
| M145T230   | 145. 0473562 | 230. 321 | 252038367    |
| M145T456   | 145. 0499047 | 456. 126 | 89355477. 44 |
| M145T309   | 145. 0499171 | 308. 967 | 430407562. 6 |
| M145T369   | 145. 0499067 | 369. 321 | 140882179. 5 |
| M145T439   | 145. 049821  | 439. 021 | 71203245. 72 |
| M145T223   | 145. 0480917 | 223. 474 | 403236946. 1 |
| M145T392   | 145. 0497969 | 391. 678 | 113991469. 8 |
| M145T764   | 145. 0482824 | 763. 856 | 42531506. 83 |
| M145T746   | 145. 0482815 | 745. 603 | 72787609. 25 |
| M145T411   | 145. 0499303 | 410. 542 | 87867092. 68 |
| M145T348   | 145. 0498109 | 348. 488 | 249826165. 6 |
| M145T563   | 145. 0482549 | 563. 297 | 167402525. 6 |
| M145T399   | 145. 0483299 | 399. 046 | 128458398. 7 |
| M145T158   | 145. 0481357 | 157. 773 | 843855700. 9 |
| M145T190   | 145. 0483862 | 189. 571 | 565416085. 3 |
| M145T721   | 145. 0483903 | 720. 704 | 143535217. 2 |
| M145T293   | 145. 049147  | 292. 623 | 1033806347   |
| M145T180   | 145. 0474631 | 179. 75  | 456209215. 2 |

|            |              |          |              |
|------------|--------------|----------|--------------|
| M145T537   | 145. 0497054 | 536. 761 | 88460853. 29 |
| M145T649_1 | 145. 0483232 | 649. 338 | 283985101. 9 |
| M145T757   | 145. 0482828 | 757. 001 | 66432249. 22 |
| M145T660   | 145. 0482804 | 660. 455 | 120044370. 5 |
| M145T419   | 145. 0499335 | 418. 97  | 99614330. 46 |
| M145T106   | 145. 0491053 | 105. 503 | 2483301606   |
| M145T446   | 145. 0498329 | 445. 984 | 79177552. 56 |
| M145T129   | 145. 0474944 | 129. 234 | 420157531. 3 |
| M145T199   | 145. 0473226 | 199. 43  | 482659680. 8 |
| M145T795   | 145. 048274  | 795. 165 | 325879362    |
| M145T604   | 145. 0483918 | 603. 95  | 78999158. 95 |
| M145T250   | 145. 0481127 | 250. 144 | 1621723974   |
| M145T143   | 145. 0491226 | 142. 85  | 725827151. 5 |
| M145T506   | 145. 049844  | 505. 855 | 347236599. 8 |
| M145T620   | 145. 048319  | 620. 172 | 102262508. 5 |
| M145T121   | 145. 0475329 | 120. 525 | 683836681. 7 |
| M145T733   | 145. 0482528 | 732. 773 | 106547411. 6 |
| M145T465   | 145. 0498321 | 464. 668 | 84471662. 44 |
| M145T672   | 145. 0483674 | 671. 649 | 113268619. 5 |
| M145T210   | 145. 0480992 | 210. 186 | 477933752. 3 |
| M145T685   | 145. 0483234 | 684. 985 | 103358375. 7 |
| M145T171   | 145. 0481712 | 170. 665 | 457152270. 5 |
| M145T427   | 145. 0499235 | 427. 362 | 70424241. 67 |
| M145T94    | 145. 0491078 | 93. 7378 | 1496366650   |
| M145T703   | 145. 0486031 | 703. 35  | 124009144. 6 |
| M145T545_1 | 145. 0496409 | 545. 203 | 88914209. 15 |
| M145T632   | 145. 048364  | 631. 982 | 163082086. 9 |
| M145T361   | 145. 0498217 | 360. 794 | 185534657. 9 |
| M145T321_1 | 145. 0491428 | 321. 198 | 1710944426   |
| M145T772   | 145. 0484293 | 772. 206 | 70007374. 63 |
| M145T588   | 145. 0497725 | 587. 521 | 122548313. 8 |
| M145T379   | 145. 0483253 | 379. 194 | 144442580. 2 |
| M145T777   | 145. 0670106 | 777. 245 | 6716729. 871 |
| M145T336   | 145. 0684552 | 336. 344 | 25941854. 01 |
| M145T95    | 145. 0682041 | 94. 7467 | 20224248. 5  |
| M145T321_2 | 145. 0684899 | 321. 198 | 14295354. 67 |
| M145T443   | 145. 0837817 | 443. 256 | 10169976. 55 |
| M145T164   | 145. 1046657 | 163. 846 | 6075416. 968 |
| M145T785   | 145. 100715  | 785. 136 | 2281440. 971 |
| M145T649_2 | 145. 1005    | 649. 338 | 9135804. 122 |
| M145T682   | 145. 1005796 | 681. 885 | 3982646. 125 |
| M145T461   | 145. 1008435 | 460. 537 | 3072116. 249 |
| M145T702   | 145. 0997231 | 702. 055 | 14316664. 02 |
| M145T562   | 145. 100564  | 561. 955 | 36849749. 28 |
| M145T172   | 145. 1046566 | 171. 935 | 11077037. 94 |
| M145T545_2 | 145. 1005668 | 545. 203 | 10706615. 52 |
| M145T102   | 145. 1079691 | 102. 247 | 58868191. 96 |
| M145T321_3 | 145. 1053141 | 321. 198 | 2852037. 677 |
| M145T209   | 145. 1160566 | 208. 905 | 3791929. 375 |
| M145T67    | 145. 1218665 | 66. 9841 | 5241199. 116 |
| M145T516   | 145. 1411452 | 516. 214 | 1361723. 553 |
| M145T81    | 145. 1441584 | 80. 824  | 20615714. 66 |
| M146T167   | 145. 5122752 | 166. 613 | 33070983. 09 |
| M146T68_1  | 145. 6067846 | 68. 0903 | 4111585. 225 |

|            |             |         |             |
|------------|-------------|---------|-------------|
| M146T61    | 146.0294052 | 61.1538 | 8479395.763 |
| M146T74    | 146.0293521 | 73.8324 | 1086737568  |
| M146T49    | 146.0293321 | 48.7362 | 4688471.494 |
| M146T362   | 146.0357914 | 362.146 | 2109471.345 |
| M146T178   | 146.0414469 | 178.408 | 29498210.32 |
| M146T123   | 146.0443284 | 123.262 | 49933050.69 |
| M146T228   | 146.0443145 | 227.633 | 4007966.272 |
| M146T159   | 146.0532356 | 159.017 | 47457781.01 |
| M146T190   | 146.0532073 | 189.571 | 34196998.31 |
| M146T293   | 146.0530083 | 292.623 | 85662675.71 |
| M146T180   | 146.0524485 | 179.75  | 33690350.34 |
| M146T649   | 146.0525367 | 649.338 | 17439205.54 |
| M146T106_1 | 146.052474  | 105.503 | 120474519.1 |
| M146T199   | 146.0531373 | 199.43  | 31706996.06 |
| M146T250   | 146.0530587 | 250.144 | 100876842.3 |
| M146T143_1 | 146.0524407 | 142.85  | 41570243.14 |
| M146T95    | 146.0524716 | 94.7467 | 127606643.2 |
| M146T321   | 146.0530975 | 321.198 | 112951605.9 |
| M146T351   | 146.0591235 | 351.348 | 8344998.625 |
| M146T411   | 146.060015  | 410.542 | 23941585.93 |
| M146T584   | 146.0596358 | 584.417 | 49346250.05 |
| M146T401   | 146.0596198 | 400.59  | 18625862.34 |
| M146T69    | 146.0595857 | 69.2834 | 2832167.59  |
| M146T42    | 146.059617  | 41.798  | 4835054.01  |
| M146T494   | 146.0596992 | 494.289 | 6388928.977 |
| M146T777   | 146.0675115 | 777.245 | 6641677.022 |
| M146T294   | 146.0804283 | 293.896 | 56495986.56 |
| M146T86    | 146.0805461 | 85.6453 | 402288918.8 |
| M146T93    | 146.0805359 | 92.7272 | 232190324.1 |
| M146T108   | 146.0910119 | 107.537 | 1205040144  |
| M146T143_2 | 146.0912348 | 142.85  | 333481971.6 |
| M146T124   | 146.0920418 | 124.487 | 127072578.7 |
| M146T98    | 146.1169792 | 97.7824 | 137902017.9 |
| M146T106_2 | 146.1171079 | 105.503 | 60767569.19 |
| M146T398   | 146.1171515 | 397.878 | 9088596.563 |
| M146T244   | 146.1170544 | 244.085 | 8698746.831 |
| M146T291   | 146.1171169 | 291.307 | 3051135.69  |
| M146T468   | 146.1172175 | 467.706 | 1394903.679 |
| M146T530   | 146.1170687 | 529.713 | 1185026.536 |
| M146T212   | 146.1169318 | 212.448 | 5128218.917 |
| M146T386   | 146.1171632 | 386.352 | 11133523.04 |
| M146T68_2  | 146.1645359 | 68.0903 | 57032728.77 |
| M147T135   | 146.5385097 | 134.574 | 2756283.121 |
| M147T148_1 | 146.5384627 | 148.117 | 2390812.034 |
| M147T137   | 146.9609844 | 137.373 | 4012781.109 |
| M147T62    | 146.9608249 | 62.1777 | 25079110.67 |
| M147T148_2 | 146.9607581 | 148.117 | 7290303.083 |
| M147T45    | 146.9608931 | 45.3435 | 24015674.18 |
| M147T785   | 146.9797084 | 785.136 | 147536119.6 |
| M147T838   | 146.9796908 | 837.524 | 104734076.8 |
| M147T731   | 146.9792994 | 731.347 | 288478211.1 |
| M147T32    | 146.9793273 | 32.4171 | 66566394.82 |
| M147T823   | 146.9796876 | 822.881 | 174208848.2 |
| M147T66    | 146.9805422 | 65.7101 | 9659303.214 |



|            |              |          |              |
|------------|--------------|----------|--------------|
| M147T211   | 147. 0120777 | 211. 288 | 1819937. 776 |
| M147T164   | 147. 0282941 | 163. 846 | 512270372. 8 |
| M147T308   | 147. 0284635 | 307. 735 | 5060871. 496 |
| M147T140   | 147. 0283493 | 140. 286 | 15639998. 37 |
| M147T74    | 147. 0302656 | 73. 8324 | 132672189. 9 |
| M147T645   | 147. 043389  | 645. 278 | 3756609. 211 |
| M147T519   | 147. 0437095 | 519. 257 | 10269225. 27 |
| M147T497   | 147. 0439046 | 497. 214 | 39277891. 3  |
| M147T478_1 | 147. 043601  | 477. 989 | 15051172. 72 |
| M147T465   | 147. 0438884 | 464. 668 | 24680048. 04 |
| M147T218   | 147. 0434444 | 217. 866 | 28666393. 54 |
| M147T592   | 147. 0434745 | 592. 067 | 4345317. 308 |
| M147T423   | 147. 0437139 | 423. 199 | 22148248. 64 |
| M147T294_1 | 147. 0534347 | 293. 896 | 4819966. 792 |
| M147T96    | 147. 0531006 | 95. 7572 | 7770323. 212 |
| M147T321   | 147. 0534608 | 321. 198 | 11852582. 92 |
| M147T632_1 | 147. 0621699 | 631. 982 | 3574497. 495 |
| M147T101   | 147. 0647701 | 101. 161 | 71684352. 5  |
| M147T158   | 147. 0647246 | 157. 773 | 19215742. 63 |
| M147T122   | 147. 0647024 | 122. 007 | 42604626. 75 |
| M147T180   | 147. 0647007 | 179. 75  | 15752995. 14 |
| M147T297   | 147. 0640894 | 296. 739 | 7867083. 477 |
| M147T143   | 147. 0647579 | 142. 85  | 34840460. 91 |
| M147T197   | 147. 0647441 | 196. 644 | 14208810. 68 |
| M147T92    | 147. 0647357 | 91. 7174 | 125137000. 8 |
| M147T280   | 147. 0647305 | 280. 345 | 7633280. 2   |
| M147T576_1 | 147. 070491  | 575. 878 | 3267876. 076 |
| M147T662   | 147. 0800483 | 661. 979 | 2673172. 57  |
| M147T294_2 | 147. 0840238 | 293. 896 | 1999972. 807 |
| M147T452   | 147. 0800261 | 451. 804 | 2260855. 352 |
| M147T181   | 147. 0758255 | 181. 154 | 17621602. 78 |
| M147T478_2 | 147. 0798642 | 477. 989 | 3487008. 189 |
| M147T88    | 147. 0758472 | 87. 6739 | 1333976336   |
| M147T369   | 147. 0911456 | 369. 321 | 17156261. 59 |
| M147T381   | 147. 0912475 | 380. 63  | 12974687. 86 |
| M147T108   | 147. 0952803 | 107. 537 | 61175110. 88 |
| M147T80    | 147. 1138873 | 79. 643  | 521160179. 9 |
| M147T477   | 147. 1164506 | 476. 554 | 4400901. 83  |
| M147T791   | 147. 1164468 | 790. 802 | 31276100. 7  |
| M147T829   | 147. 1165024 | 828. 73  | 8967447. 795 |
| M147T462   | 147. 1165178 | 461. 845 | 3486071. 692 |
| M147T649   | 147. 1157802 | 649. 338 | 311281593. 7 |
| M147T682   | 147. 1158351 | 681. 885 | 54680399. 39 |
| M147T670   | 147. 1158435 | 670. 166 | 73608599. 16 |
| M147T562   | 147. 1157995 | 561. 955 | 1124969785   |
| M147T620   | 147. 1164614 | 620. 172 | 21654572. 97 |
| M147T594   | 147. 1164549 | 593. 62  | 16484307. 41 |
| M147T719   | 147. 115908  | 719. 215 | 79365008. 24 |
| M147T607   | 147. 1158139 | 606. 774 | 30378330. 39 |
| M147T740   | 147. 115853  | 740. 014 | 34724815. 21 |
| M147T703   | 147. 115838  | 703. 35  | 313875324. 5 |
| M147T545   | 147. 1157402 | 545. 203 | 191603132. 1 |
| M147T632_2 | 147. 1158822 | 631. 982 | 37435957. 62 |
| M147T800   | 147. 116008  | 800. 484 | 17342629. 2  |

|            |              |          |              |
|------------|--------------|----------|--------------|
| M147T694   | 147. 115838  | 693. 81  | 134795773. 2 |
| M147T576_2 | 147. 1164424 | 575. 878 | 38701415. 68 |
| M147T772   | 147. 1166467 | 772. 206 | 43840382. 63 |
| M148T318   | 147. 5995195 | 318. 497 | 1622760. 098 |
| M148T252   | 148. 015788  | 251. 555 | 18736899. 6  |
| M148T132   | 148. 018006  | 131. 949 | 9422407. 851 |
| M148T45    | 148. 0179158 | 45. 3435 | 35192615. 27 |
| M148T75    | 148. 0265934 | 74. 9588 | 144424470. 6 |
| M148T164   | 148. 0315952 | 163. 846 | 27237269. 17 |
| M148T126   | 148. 0331955 | 125. 598 | 11107286. 66 |
| M148T185   | 148. 0387837 | 185. 398 | 2750174. 007 |
| M148T199   | 148. 0388177 | 199. 43  | 5802058. 623 |
| M148T389   | 148. 0387294 | 389. 035 | 690299. 1969 |
| M148T151   | 148. 0414262 | 151. 016 | 3211574. 694 |
| M148T515   | 148. 0515079 | 514. 727 | 2520424. 029 |
| M148T218   | 148. 046883  | 217. 866 | 1849883. 16  |
| M148T101_1 | 148. 059735  | 101. 161 | 79804533. 86 |
| M148T127   | 148. 0593371 | 126. 785 | 83328293. 03 |
| M148T109   | 148. 0599671 | 108. 698 | 54970866. 78 |
| M148T197   | 148. 0598016 | 196. 644 | 15050950. 92 |
| M148T91    | 148. 0593584 | 90. 7088 | 2242104509   |
| M148T279   | 148. 0597691 | 279. 039 | 1606067. 518 |
| M148T39    | 148. 0751583 | 39. 4128 | 2552283. 112 |
| M148T65    | 148. 0751699 | 64. 6213 | 1235949. 6   |
| M148T519   | 148. 0752292 | 519. 257 | 3359574. 187 |
| M148T345   | 148. 0752571 | 344. 555 | 7161323. 788 |
| M148T88    | 148. 0793937 | 87. 6739 | 67701560. 16 |
| M148T672   | 148. 0751877 | 671. 649 | 1812089. 297 |
| M148T466   | 148. 0753066 | 466. 162 | 3412089. 986 |
| M148T101_2 | 148. 0963286 | 101. 161 | 42701857. 11 |
| M148T143   | 148. 0962867 | 142. 85  | 15563602. 35 |
| M148T110   | 148. 0963418 | 110. 047 | 31998531. 11 |
| M148T119   | 148. 1070342 | 119. 433 | 242177478. 7 |
| M148T137   | 148. 1070327 | 137. 373 | 65106525. 43 |
| M148T106   | 148. 1070485 | 105. 503 | 209139862    |
| M148T129   | 148. 1070388 | 129. 234 | 87527169. 15 |
| M148T649   | 148. 119622  | 649. 338 | 34810747. 66 |
| M148T80    | 148. 1157629 | 79. 643  | 43106684. 67 |
| M148T562   | 148. 1192455 | 561. 955 | 117232295. 9 |
| M148T719   | 148. 1197558 | 719. 215 | 9638555. 235 |
| M148T703   | 148. 1194938 | 703. 35  | 36451309. 97 |
| M148T694   | 148. 1206278 | 693. 81  | 14212129. 87 |
| M149T152   | 148. 9763926 | 152. 375 | 10875915. 48 |
| M149T93    | 149. 0241267 | 92. 7272 | 26942998. 9  |
| M149T65    | 149. 0342055 | 64. 6213 | 1507235. 077 |
| M149T52    | 149. 0342974 | 52. 4521 | 1671769. 634 |
| M149T44    | 149. 0343108 | 44. 1485 | 1809036. 808 |
| M149T272   | 149. 0440549 | 272. 304 | 2416645. 436 |
| M149T701   | 149. 0593376 | 700. 758 | 9472306. 313 |
| M149T711   | 149. 0593014 | 710. 534 | 21263457. 97 |
| M149T345   | 149. 059355  | 344. 555 | 25487458. 42 |
| M149T510   | 149. 0604164 | 510. 333 | 44380142. 88 |
| M149T834   | 149. 0591735 | 834. 486 | 2087168. 05  |
| M149T455   | 149. 059322  | 454. 739 | 8900992. 481 |

|            |             |         |             |
|------------|-------------|---------|-------------|
| M149T91    | 149.0632611 | 90.7088 | 118435550.8 |
| M149T309   | 149.0707013 | 308.967 | 8126446.213 |
| M149T106   | 149.0703976 | 105.503 | 63443420.44 |
| M149T335   | 149.0704684 | 334.966 | 7791868.893 |
| M149T135   | 149.0704745 | 134.574 | 23400864.56 |
| M149T393   | 149.0689214 | 392.715 | 12143425.09 |
| M149T250   | 149.0704144 | 250.144 | 5709268.91  |
| M149T188   | 149.0705413 | 188.126 | 3817657.349 |
| M149T219   | 149.0703406 | 219.233 | 4319762.86  |
| M149T348   | 149.0705948 | 348.488 | 7086884.894 |
| M149T543   | 149.0947538 | 542.766 | 321590603.4 |
| M149T563   | 149.0962391 | 563.297 | 68825093.41 |
| M149T500_1 | 149.0958557 | 500.045 | 9276548.747 |
| M149T619   | 149.0963351 | 618.683 | 17373583.31 |
| M149T32    | 149.0958732 | 32.4171 | 3896842.616 |
| M149T760   | 149.0956513 | 759.605 | 10019959.32 |
| M149T62    | 149.0958037 | 62.1777 | 8208663.133 |
| M149T350   | 149.107014  | 349.911 | 3459013.824 |
| M149T108   | 149.106038  | 107.537 | 6308957.162 |
| M149T500_2 | 149.1169139 | 500.045 | 821546.8819 |
| M149T649   | 149.1320191 | 649.338 | 96380764.13 |
| M149T660   | 149.1320846 | 660.455 | 34448562.66 |
| M149T682   | 149.1320617 | 681.885 | 15470706.73 |
| M149T670   | 149.1317225 | 670.166 | 22146441.96 |
| M149T562   | 149.1319069 | 561.955 | 125842613.7 |
| M149T692   | 149.1317646 | 692.461 | 14629892.06 |
| M149T719   | 149.132159  | 719.215 | 30890513.71 |
| M149T703   | 149.1320676 | 703.35  | 98754422.61 |
| M149T545   | 149.1319635 | 545.203 | 30128981.19 |
| M149T737   | 149.1320627 | 737.198 | 18909047.7  |
| M149T632   | 149.1321462 | 631.982 | 13255107.46 |
| M149T576   | 149.1320035 | 575.878 | 6962323.638 |
| M150T48    | 149.9399816 | 47.6391 | 12105096.48 |
| M150T69_1  | 149.9399003 | 69.2834 | 7768246.763 |
| M150T75    | 149.9522543 | 74.9588 | 28036664.2  |
| M150T37    | 149.965652  | 37.1891 | 4590669.791 |
| M150T49    | 149.979385  | 48.7362 | 1794333.982 |
| M150T151_1 | 149.9974484 | 151.016 | 1287819.142 |
| M150T459   | 150.026301  | 458.985 | 1586418.131 |
| M150T69_2  | 150.0549219 | 69.2834 | 1763113.947 |
| M150T63    | 150.0549843 | 63.4448 | 1882354.418 |
| M150T41    | 150.0550117 | 40.6031 | 5134706.032 |
| M150T448   | 150.0549604 | 447.531 | 3070686.239 |
| M150T104   | 150.0544905 | 104.493 | 4181670.853 |
| M150T165   | 150.0559365 | 165.217 | 28692537.51 |
| M150T552   | 150.0572685 | 552.452 | 623717.7263 |
| M150T381   | 150.0565472 | 380.63  | 4536039.78  |
| M150T151_2 | 150.0582933 | 151.016 | 1392989773  |
| M150T56    | 150.0563747 | 56.1096 | 2229106.23  |
| M150T91    | 150.0640985 | 90.7088 | 16213551.77 |
| M150T210   | 150.0767952 | 210.186 | 22082097.27 |
| M150T87    | 150.0755394 | 86.6643 | 95765302.45 |
| M150T290   | 150.0907628 | 289.912 | 13242090.1  |
| M150T323   | 150.0903442 | 322.536 | 69241744.92 |

|            |             |         |             |
|------------|-------------|---------|-------------|
| M150T491   | 150.0910259 | 491.373 | 7219082.784 |
| M150T403   | 150.0909948 | 403.447 | 4835684.256 |
| M150T299   | 150.0908127 | 299.493 | 14513057.32 |
| M150T151_3 | 150.0906752 | 151.016 | 5397267.249 |
| M150T635   | 150.0907674 | 635.022 | 10624500.63 |
| M150T429   | 150.0909932 | 428.735 | 4396745.697 |
| M150T554   | 150.0990586 | 553.936 | 3632435.849 |
| M150T543   | 150.0990387 | 542.766 | 31228097.87 |
| M150T32    | 150.1003607 | 32.4171 | 433572.0911 |
| M150T237   | 150.1020244 | 237.171 | 4518182.237 |
| M150T151_4 | 150.1173331 | 151.016 | 2463250.076 |
| M150T425   | 150.1271032 | 424.572 | 75732152.29 |
| M150T649   | 150.1353914 | 649.338 | 10303677.26 |
| M150T562   | 150.135052  | 561.955 | 7901823.875 |
| M150T703   | 150.1354262 | 703.35  | 9298202.697 |
| M151T75    | 150.9748977 | 74.9588 | 22145752.35 |
| M151T36    | 151.0047151 | 35.8675 | 5506398.759 |
| M151T74_1  | 151.0084719 | 73.8324 | 109162845.4 |
| M151T61    | 151.033524  | 61.1538 | 107880699.1 |
| M151T33    | 151.0334028 | 33.467  | 76592913.94 |
| M151T74_2  | 151.033449  | 73.8324 | 15500084124 |
| M151T50    | 151.0336858 | 50.041  | 64097563.54 |
| M151T694   | 151.0347078 | 693.81  | 52451827.64 |
| M151T106   | 151.0382864 | 105.503 | 51201495.93 |
| M151T129   | 151.0382475 | 129.234 | 24303061.63 |
| M151T291   | 151.0383173 | 291.307 | 48535406.46 |
| M151T171   | 151.0382924 | 170.665 | 9230645.185 |
| M151T154   | 151.0382161 | 153.785 | 26037020.08 |
| M151T341   | 151.0383995 | 340.548 | 17133333.81 |
| M151T188   | 151.0384155 | 188.126 | 23427837.44 |
| M151T42    | 151.0497306 | 41.798  | 1461561.612 |
| M151T65_1  | 151.0496038 | 64.6213 | 989975.4106 |
| M151T151   | 151.0629474 | 151.016 | 48436774.85 |
| M151T788   | 151.0747523 | 787.856 | 13097919.54 |
| M151T474   | 151.0749844 | 473.597 | 11711505.39 |
| M151T39    | 151.0748536 | 39.4128 | 4741799.088 |
| M151T503   | 151.0750093 | 503.046 | 33810975.42 |
| M151T485   | 151.0749213 | 485.471 | 15063603.52 |
| M151T753   | 151.0749804 | 752.541 | 5201485.3   |
| M151T802   | 151.075145  | 801.685 | 16069363.46 |
| M151T86    | 151.0783438 | 85.6453 | 126726260.4 |
| M151T439   | 151.0862958 | 439.021 | 5264494.875 |
| M151T540   | 151.08643   | 539.764 | 2750590.201 |
| M151T207   | 151.0860172 | 207.393 | 2533831.549 |
| M151T384   | 151.0862341 | 383.536 | 3294546.169 |
| M151T821   | 151.0861945 | 821.334 | 1453324.88  |
| M151T74_3  | 151.0951277 | 73.8324 | 30342075.76 |
| M151T323_1 | 151.0944637 | 322.536 | 4846002.007 |
| M151T41    | 151.0958559 | 40.6031 | 4131939.337 |
| M151T54    | 151.0958652 | 53.6731 | 8248681.98  |
| M151T456   | 151.1115468 | 456.126 | 15969102.94 |
| M151T436   | 151.1111003 | 436.069 | 31456217.13 |
| M151T412   | 151.1055607 | 411.838 | 5990667.494 |
| M151T572   | 151.1113181 | 571.523 | 10250995.11 |

|            |              |          |              |
|------------|--------------|----------|--------------|
| M151T633   | 151. 1113065 | 633. 476 | 10960922. 59 |
| M151T32    | 151. 1113478 | 32. 4171 | 5983109. 488 |
| M151T487   | 151. 1112984 | 486. 885 | 16142726. 9  |
| M151T65_2  | 151. 1113187 | 64. 6213 | 11684267. 03 |
| M151T396   | 151. 1114511 | 396. 415 | 21113250. 06 |
| M151T398   | 151. 1225803 | 397. 878 | 3211832. 471 |
| M151T323_2 | 151. 122507  | 322. 536 | 6360954. 693 |
| M151T379   | 151. 1225498 | 379. 194 | 5981690. 673 |
| M151T562   | 151. 1476159 | 561. 955 | 6408315. 342 |
| M152T86    | 151. 5800234 | 85. 6453 | 14311851. 53 |
| M152T61_1  | 151. 9368609 | 61. 1538 | 2903984. 238 |
| M152T48    | 151. 9371444 | 47. 6391 | 2902570. 486 |
| M152T69    | 151. 9378136 | 69. 2834 | 2786061. 551 |
| M152T76    | 151. 9489924 | 76. 0874 | 15521502. 68 |
| M152T420   | 152. 0347516 | 420. 274 | 6884222. 749 |
| M152T176   | 152. 031243  | 175. 952 | 27529252. 98 |
| M152T36    | 152. 0357701 | 35. 8675 | 4256779. 672 |
| M152T61_2  | 152. 035785  | 61. 1538 | 12647937. 05 |
| M152T74    | 152. 0358445 | 73. 8324 | 2045005007   |
| M152T43    | 152. 0375092 | 43. 0471 | 6990194. 337 |
| M152T406   | 152. 0365085 | 406. 289 | 7821026. 958 |
| M152T311   | 152. 0563405 | 311. 445 | 41351520. 99 |
| M152T122   | 152. 0560192 | 122. 007 | 79617888. 53 |
| M152T241   | 152. 0560655 | 241. 368 | 10944102. 69 |
| M152T106_1 | 152. 0563588 | 105. 503 | 104339193. 1 |
| M152T143   | 152. 0560398 | 142. 85  | 166603013. 6 |
| M152T152   | 152. 055991  | 152. 375 | 22342434. 72 |
| M152T301_1 | 152. 0564563 | 300. 782 | 388165180. 5 |
| M152T187_1 | 152. 0700696 | 186. 709 | 26682063. 31 |
| M152T435   | 152. 0698862 | 434. 589 | 23145701. 87 |
| M152T98    | 152. 0702224 | 97. 7824 | 25133498. 61 |
| M152T106_2 | 152. 0701386 | 105. 503 | 35232734. 51 |
| M152T537   | 152. 0700045 | 536. 761 | 32408163. 15 |
| M152T396   | 152. 0700872 | 396. 415 | 23200087. 84 |
| M152T110   | 152. 0816109 | 110. 047 | 5525887. 049 |
| M152T201   | 152. 0811702 | 200. 766 | 3621380. 191 |
| M152T279   | 152. 0814032 | 279. 039 | 12353745. 55 |
| M152T187_2 | 152. 1064727 | 186. 709 | 30658749. 31 |
| M152T617   | 152. 1065329 | 617. 133 | 5217002. 623 |
| M152T329   | 152. 1064203 | 329. 481 | 22658576. 5  |
| M152T399   | 152. 1067227 | 399. 046 | 6547241. 155 |
| M152T39    | 152. 1067272 | 39. 4128 | 3578538. 04  |
| M152T683   | 152. 1062764 | 683. 436 | 3347015. 096 |
| M152T371   | 152. 1067201 | 370. 777 | 11761913. 83 |
| M152T442   | 152. 1066995 | 442. 005 | 7362737. 953 |
| M152T697   | 152. 1065    | 696. 575 | 2823262. 122 |
| M152T301_2 | 152. 1064515 | 300. 782 | 5459954. 742 |
| M152T422   | 152. 1177712 | 421. 784 | 9819341. 123 |
| M153T331   | 152. 5201318 | 330. 809 | 4129998. 547 |
| M153T403   | 152. 569938  | 403. 447 | 1085116. 01  |
| M153T59    | 152. 9464672 | 58. 6151 | 2100074. 413 |
| M153T69    | 152. 9944866 | 69. 2834 | 4757729. 419 |
| M153T133   | 152. 994939  | 133. 259 | 2583984. 341 |
| M153T35_1  | 152. 9941957 | 34. 5397 | 25444916     |

|            |             |         |             |
|------------|-------------|---------|-------------|
| M153T35_2  | 153.0101521 | 34.5397 | 9104404.373 |
| M153T44    | 153.0321966 | 44.1485 | 6937173.508 |
| M153T50    | 153.0322645 | 50.041  | 7626991.44  |
| M153T61    | 153.0323625 | 61.1538 | 15716811.22 |
| M153T74    | 153.0321307 | 73.8324 | 2218709478  |
| M153T136   | 153.0322728 | 135.971 | 10072646.4  |
| M153T190   | 153.0401183 | 189.571 | 61466118.9  |
| M153T811   | 153.0412097 | 811.413 | 748718.8865 |
| M153T682   | 153.052831  | 681.885 | 8779700.505 |
| M153T534   | 153.0547475 | 533.958 | 80896133.43 |
| M153T39_1  | 153.0540594 | 39.4128 | 20170623.69 |
| M153T362   | 153.0537332 | 362.146 | 24234285.79 |
| M153T62    | 153.0540541 | 62.1777 | 17410275.71 |
| M153T301   | 153.0548522 | 300.782 | 13185876.44 |
| M153T104_1 | 153.0540533 | 104.493 | 15510618.81 |
| M153T635   | 153.0618997 | 635.022 | 1047305.321 |
| M153T345   | 153.065408  | 344.555 | 9194540.14  |
| M153T389   | 153.065457  | 389.035 | 4528926.833 |
| M153T68    | 153.065304  | 68.0903 | 3025920.168 |
| M153T101   | 153.0751317 | 101.161 | 26413430.33 |
| M153T93    | 153.0752201 | 92.7272 | 25478456.84 |
| M153T39_2  | 153.0904788 | 39.4128 | 8517381.438 |
| M153T67    | 153.0905158 | 66.9841 | 7430504.8   |
| M153T54    | 153.0904723 | 53.6731 | 5742968.42  |
| M153T411   | 153.1019867 | 410.542 | 9331144.184 |
| M153T202   | 153.1016201 | 202.149 | 4288388.989 |
| M153T283   | 153.1016759 | 282.886 | 24896949.47 |
| M153T418_1 | 153.102     | 417.676 | 6830581.098 |
| M153T446   | 153.101687  | 445.984 | 6989896.788 |
| M153T104_2 | 153.1019036 | 104.493 | 25546903.03 |
| M153T334   | 153.1266579 | 333.715 | 7840688.75  |
| M153T339   | 153.1267313 | 339.085 | 9483034.745 |
| M153T328   | 153.1266803 | 328.106 | 9924754.268 |
| M153T187   | 153.1269837 | 186.709 | 39242769.36 |
| M153T791   | 153.1270711 | 790.802 | 46431461.94 |
| M153T140   | 153.1269329 | 140.286 | 21617563.34 |
| M153T727   | 153.1267281 | 726.707 | 7745679.341 |
| M153T348   | 153.1266743 | 348.488 | 11536530.24 |
| M153T743   | 153.1266049 | 742.68  | 7445030.058 |
| M153T565   | 153.1266138 | 564.534 | 13600775.39 |
| M153T701   | 153.1266279 | 700.758 | 10210896.19 |
| M153T830   | 153.1266992 | 830.193 | 8426573.455 |
| M153T207   | 153.1269208 | 207.393 | 24572151.65 |
| M153T451   | 153.1271343 | 450.503 | 48044680.56 |
| M153T474   | 153.1273683 | 473.597 | 39747534.07 |
| M153T813   | 153.1265894 | 812.862 | 8936676.487 |
| M153T535   | 153.1270425 | 535.329 | 59077148.87 |
| M153T310   | 153.1270494 | 310.075 | 16551764.83 |
| M153T647   | 153.1266612 | 646.794 | 17776832.38 |
| M153T461   | 153.1271659 | 460.537 | 61648131.22 |
| M153T388   | 153.1266291 | 387.763 | 15438291.24 |
| M153T128   | 153.1270496 | 127.944 | 20971094.3  |
| M153T616   | 153.1266425 | 615.594 | 20755351.02 |
| M153T760   | 153.1266455 | 759.605 | 6252581.164 |

|            |              |          |              |
|------------|--------------|----------|--------------|
| M153T286   | 153. 1266643 | 285. 9   | 64098511. 5  |
| M153T604   | 153. 1266328 | 603. 95  | 11499866. 72 |
| M153T168   | 153. 1268833 | 167. 804 | 17680723. 44 |
| M153T753   | 153. 1266189 | 752. 541 | 7367899. 064 |
| M153T418_2 | 153. 1272534 | 417. 676 | 56040239. 33 |
| M153T577   | 153. 1266221 | 577. 366 | 18893398. 61 |
| M153T594   | 153. 1266678 | 593. 62  | 13562403. 48 |
| M153T555   | 153. 1270172 | 555. 358 | 22135273. 41 |
| M153T488   | 153. 1270337 | 488. 437 | 34501365. 94 |
| M153T673   | 153. 1266488 | 672. 956 | 13648897. 56 |
| M153T685   | 153. 1266321 | 684. 985 | 12170697. 9  |
| M153T239   | 153. 127042  | 238. 605 | 31613739. 75 |
| M153T547   | 153. 126893  | 546. 651 | 28577238. 96 |
| M153T777   | 153. 1266264 | 777. 245 | 14069275. 52 |
| M153T657   | 153. 1266413 | 657. 451 | 16716419. 64 |
| M153T509   | 153. 127031  | 508. 883 | 29793242. 39 |
| M153T218   | 153. 1269247 | 217. 866 | 28935283. 94 |
| M153T768   | 153. 1266465 | 768. 166 | 7503903. 794 |
| M153T371   | 153. 1266031 | 370. 777 | 16101610. 39 |
| M153T716   | 153. 1266444 | 716. 403 | 10687634. 99 |
| M153T359   | 153. 1266772 | 359. 32  | 12287203. 66 |
| M153T176   | 153. 1268776 | 175. 952 | 24509172. 38 |
| M153T823   | 153. 1266533 | 822. 881 | 11347335. 15 |
| M153T318   | 153. 1266415 | 318. 497 | 16025659. 55 |
| M153T396   | 153. 1266994 | 396. 415 | 10545212. 63 |
| M153T268   | 153. 1270387 | 268. 427 | 88609972. 23 |
| M153T435   | 153. 1382926 | 434. 589 | 3256819. 854 |
| M154T321   | 153. 5414132 | 321. 198 | 38653663. 16 |
| M154T201_1 | 153. 5459814 | 200. 766 | 16358964. 21 |
| M154T137   | 153. 9555264 | 137. 373 | 2484763. 246 |
| M154T62    | 153. 9564229 | 62. 1777 | 24045210. 57 |
| M154T33    | 153. 9926096 | 33. 467  | 36194376. 7  |
| M154T74_1  | 153. 9924461 | 73. 8324 | 5377329. 748 |
| M154T767   | 153. 9927329 | 766. 742 | 13077273. 39 |
| M154T708   | 153. 9927427 | 707. 557 | 9377962. 826 |
| M154T783   | 153. 9927134 | 782. 558 | 9875452. 162 |
| M154T36    | 154. 0046197 | 35. 8675 | 4466092. 322 |
| M154T121   | 154. 0015374 | 120. 525 | 184184809. 1 |
| M154T111   | 154. 0020693 | 111. 382 | 77507878. 64 |
| M154T236   | 154. 0148839 | 235. 734 | 3014998. 032 |
| M154T74_2  | 154. 0355032 | 73. 8324 | 105992450. 6 |
| M154T190   | 154. 0437194 | 189. 571 | 1941406. 621 |
| M154T310   | 154. 0485599 | 310. 075 | 48515452. 71 |
| M154T143_1 | 154. 0491353 | 142. 85  | 16710214. 27 |
| M154T446   | 154. 0494949 | 445. 984 | 193055233. 3 |
| M154T69    | 154. 0493057 | 69. 2834 | 4041300. 454 |
| M154T198   | 154. 0487884 | 198. 072 | 36716145. 84 |
| M154T104   | 154. 0491119 | 104. 493 | 85607137. 45 |
| M154T459   | 154. 0588548 | 458. 985 | 798470. 8694 |
| M154T534   | 154. 0577958 | 533. 958 | 6178713. 794 |
| M154T301_1 | 154. 0599209 | 300. 782 | 1594655. 157 |
| M154T802   | 154. 0606088 | 801. 685 | 2950068. 635 |
| M154T309   | 154. 085173  | 308. 967 | 18282805. 57 |
| M154T456   | 154. 0864402 | 456. 126 | 11809298. 11 |

|            |              |          |              |
|------------|--------------|----------|--------------|
| M154T241   | 154. 0856594 | 241. 368 | 14952300. 21 |
| M154T432   | 154. 0857552 | 431. 64  | 10397057. 36 |
| M154T398   | 154. 0858432 | 397. 878 | 14082213. 77 |
| M154T412   | 154. 0864579 | 411. 838 | 13256274. 87 |
| M154T469   | 154. 084817  | 469. 252 | 15624036. 86 |
| M154T286   | 154. 0848803 | 285. 9   | 103119913. 3 |
| M154T350   | 154. 08648   | 349. 911 | 8731641. 548 |
| M154T264   | 154. 0856732 | 264. 079 | 22051377. 15 |
| M154T503   | 154. 0857911 | 503. 046 | 33185354. 42 |
| M154T538   | 154. 0848928 | 538. 316 | 7991162. 072 |
| M154T108   | 154. 0855645 | 107. 537 | 43794525. 26 |
| M154T249   | 154. 0850631 | 248. 895 | 17061203. 06 |
| M154T143_2 | 154. 0856476 | 142. 85  | 22307872. 89 |
| M154T485   | 154. 0864571 | 485. 471 | 18601578. 91 |
| M154T381   | 154. 0848689 | 380. 63  | 22260536. 65 |
| M154T177   | 154. 0855845 | 177. 295 | 13939180. 76 |
| M154T331_1 | 154. 0858204 | 330. 809 | 16986494. 87 |
| M154T275   | 154. 0848759 | 274. 968 | 40995005. 84 |
| M154T201_2 | 154. 0857444 | 200. 766 | 38356115. 34 |
| M154T341   | 154. 0864512 | 340. 548 | 11674496. 21 |
| M154T528   | 154. 0849156 | 528. 185 | 10316498. 24 |
| M154T320   | 154. 0852663 | 319. 758 | 12990307. 81 |
| M154T359   | 154. 084732  | 359. 32  | 17081299. 78 |
| M154T549   | 154. 0855595 | 549. 375 | 20409819. 73 |
| M154T423   | 154. 0864479 | 423. 199 | 9804145. 013 |
| M154T442   | 154. 0857507 | 442. 005 | 12316500. 3  |
| M154T301_2 | 154. 0850253 | 300. 782 | 25319777. 02 |
| M154T222   | 154. 085734  | 222. 017 | 20194804. 73 |
| M154T160   | 154. 096895  | 160. 369 | 343631368. 3 |
| M154T274   | 154. 0968587 | 273. 531 | 17584945. 39 |
| M154T331_2 | 154. 0971015 | 330. 809 | 2782983. 217 |
| M154T173   | 154. 096932  | 173. 407 | 307980618. 5 |
| M154T168   | 154. 1082102 | 167. 804 | 21968570. 96 |
| M154T150   | 154. 1082053 | 149. 65  | 22310862. 42 |
| M154T63    | 154. 1191622 | 63. 4448 | 5633602. 897 |
| M154T50    | 154. 1193168 | 50. 041  | 3139287. 306 |
| M154T656   | 154. 1224713 | 655. 9   | 31773839. 43 |
| M154T673   | 154. 1223863 | 672. 956 | 43056933. 31 |
| M154T451   | 154. 1303502 | 450. 503 | 5259275. 042 |
| M154T535   | 154. 1302459 | 535. 329 | 5087613. 245 |
| M154T461   | 154. 1304249 | 460. 537 | 5581550. 268 |
| M154T46    | 154. 130185  | 46. 447  | 5176063. 287 |
| M154T418   | 154. 1303275 | 417. 676 | 5317780. 94  |
| M155T121   | 154. 5033724 | 120. 525 | 17113379. 65 |
| M155T111   | 154. 5033494 | 111. 382 | 5412299. 98  |
| M155T168   | 154. 5174712 | 167. 804 | 17436466. 03 |
| M155T160   | 154. 5176969 | 160. 369 | 11283538     |
| M155T36    | 154. 9664529 | 35. 8675 | 6980378. 238 |
| M155T43    | 154. 9664367 | 43. 0471 | 8089453. 427 |
| M155T50    | 154. 9672271 | 50. 041  | 4937240. 909 |
| M155T65    | 154. 9664114 | 64. 6213 | 8889032. 095 |
| M155T540   | 154. 9892462 | 539. 764 | 101180809. 8 |
| M155T665   | 154. 9892447 | 664. 745 | 160359943. 8 |
| M155T639_1 | 154. 9885846 | 639. 219 | 274623618. 6 |



|            |              |          |              |
|------------|--------------|----------|--------------|
| M155T399   | 154. 9892341 | 399. 046 | 153911262. 7 |
| M155T388   | 154. 9892239 | 387. 763 | 103960889. 1 |
| M155T811   | 154. 9883699 | 811. 413 | 68072103. 04 |
| M155T613   | 154. 9885509 | 612. 699 | 199251090. 5 |
| M155T827   | 154. 988117  | 827. 271 | 69490890. 34 |
| M155T655   | 154. 9886353 | 654. 542 | 123221522. 3 |
| M155T588   | 154. 9885679 | 587. 521 | 448851619. 9 |
| M155T411   | 154. 9910518 | 410. 542 | 104762978. 3 |
| M155T794   | 154. 9909684 | 793. 649 | 108766577. 6 |
| M155T432   | 154. 9910667 | 431. 64  | 138007239    |
| M155T419   | 154. 9910043 | 418. 97  | 127228585. 7 |
| M155T688   | 154. 9910717 | 687. 95  | 258234373    |
| M155T533   | 154. 9910364 | 532. 526 | 136227543. 4 |
| M155T506   | 154. 9909578 | 505. 855 | 243031703. 4 |
| M155T488_1 | 154. 9910136 | 488. 437 | 109715451. 4 |
| M155T449   | 154. 9910595 | 448. 978 | 102692270. 1 |
| M155T378   | 154. 9909829 | 377. 704 | 120615865    |
| M155T458   | 154. 9910526 | 457. 576 | 128159315. 7 |
| M155T731   | 154. 9903862 | 731. 347 | 2321773537   |
| M155T69    | 154. 9914077 | 69. 2834 | 202643643. 8 |
| M155T471   | 154. 9910106 | 470. 602 | 119378371. 7 |
| M155T480   | 154. 9910629 | 479. 527 | 109607640. 7 |
| M155T677   | 154. 9910719 | 677. 376 | 219270024. 9 |
| M155T35    | 154. 9914943 | 34. 5397 | 442340786. 3 |
| M155T368   | 154. 990993  | 367. 949 | 145923045. 1 |
| M155T439   | 155. 0336344 | 439. 021 | 2154125. 874 |
| M155T416   | 155. 0333699 | 416. 239 | 3010430. 632 |
| M155T180   | 155. 03337   | 179. 75  | 8492737. 996 |
| M155T74    | 155. 0292922 | 73. 8324 | 9415995. 009 |
| M155T385   | 155. 0334942 | 385. 081 | 4621305. 166 |
| M155T219   | 155. 0333877 | 219. 233 | 5170144. 632 |
| M155T87    | 155. 0419209 | 86. 6643 | 17421989. 04 |
| M155T101   | 155. 0444951 | 101. 161 | 5970943. 26  |
| M155T144   | 155. 0444604 | 143. 959 | 2178222. 648 |
| M155T177   | 155. 046867  | 177. 295 | 15639523. 99 |
| M155T402   | 155. 0446495 | 401. 963 | 15333887. 43 |
| M155T198   | 155. 0528607 | 198. 072 | 1732976. 631 |
| M155T576   | 155. 0592335 | 575. 878 | 22071700. 33 |
| M155T497   | 155. 0698088 | 497. 214 | 6204615. 127 |
| M155T605   | 155. 0698505 | 605. 264 | 5029092. 976 |
| M155T594   | 155. 0697674 | 593. 62  | 6010516. 6   |
| M155T62    | 155. 0697562 | 62. 1777 | 11215865. 1  |
| M155T44    | 155. 0697586 | 44. 1485 | 16950952. 38 |
| M155T459   | 155. 0800108 | 458. 985 | 6402873. 228 |
| M155T80    | 155. 0788976 | 79. 643  | 8731242. 506 |
| M155T535   | 155. 0795059 | 535. 329 | 5959495. 822 |
| M155T263   | 155. 0808005 | 262. 529 | 9527409. 557 |
| M155T639_2 | 155. 0848511 | 639. 219 | 3434651. 873 |
| M155T306   | 155. 0811098 | 306. 247 | 72857927     |
| M155T282   | 155. 0810122 | 281. 666 | 16654241. 39 |
| M155T104   | 155. 0810073 | 104. 493 | 6817641. 098 |
| M155T525   | 155. 0825864 | 525. 132 | 8770668. 148 |
| M155T567   | 155. 0849194 | 567. 1   | 39329083. 88 |
| M155T347   | 155. 0810143 | 347. 175 | 10411811. 45 |

|            |             |         |             |
|------------|-------------|---------|-------------|
| M155T324   | 155.0808021 | 323.984 | 17664959.45 |
| M155T199   | 155.0922376 | 199.43  | 1879211.747 |
| M155T161   | 155.1002349 | 161.494 | 22849259.83 |
| M155T173   | 155.1003048 | 173.407 | 19870312.78 |
| M155T705   | 155.1061651 | 704.715 | 10759355.75 |
| M155T816   | 155.1060137 | 815.517 | 15569161.17 |
| M155T728   | 155.1061645 | 728.25  | 11762035.71 |
| M155T455   | 155.1063002 | 454.739 | 7508685.947 |
| M155T288   | 155.1285122 | 288.481 | 16037342.73 |
| M155T250   | 155.1284151 | 250.144 | 40192661.36 |
| M155T488_2 | 155.142671  | 488.437 | 4827225.059 |
| M155T445   | 155.1426419 | 444.725 | 6694218.365 |
| M155T530   | 155.1424216 | 529.713 | 2587011.663 |
| M155T716   | 155.1426198 | 716.403 | 10596976.18 |
| M155T66    | 155.1423297 | 65.7101 | 3600254.62  |
| M156T369   | 155.5784597 | 369.321 | 2213400.936 |
| M156T304   | 155.5968123 | 303.513 | 9671191.423 |
| M156T662   | 155.9887408 | 661.979 | 3036576.863 |
| M156T69    | 155.9928039 | 69.2834 | 2704260.489 |
| M156T62    | 155.9909318 | 62.1777 | 1959671.049 |
| M156T698   | 155.9927961 | 697.952 | 9520027.515 |
| M156T751   | 155.9884078 | 751.333 | 6402868.027 |
| M156T713   | 155.992791  | 713.464 | 17794970.64 |
| M156T35    | 155.9909437 | 34.5397 | 30949437.45 |
| M156T730   | 155.9881799 | 729.798 | 17377593.87 |
| M156T119   | 155.9982739 | 119.433 | 5642492.831 |
| M156T74    | 156.0136529 | 73.8324 | 433772191   |
| M156T310   | 156.0287994 | 310.075 | 71823999.8  |
| M156T143   | 156.0284495 | 142.85  | 10555770.26 |
| M156T411   | 156.0650873 | 410.542 | 10536776.74 |
| M156T98    | 156.0650002 | 97.7824 | 71189208.16 |
| M156T389   | 156.0644157 | 389.035 | 85043295.33 |
| M156T374   | 156.0645651 | 373.532 | 39686997.17 |
| M156T320   | 156.0641327 | 319.758 | 17239418.1  |
| M156T70    | 156.0647875 | 70.3428 | 8386538.123 |
| M156T358   | 156.0644437 | 357.958 | 56097835.06 |
| M156T155   | 156.0646948 | 155.197 | 79445818.94 |
| M156T254   | 156.0641262 | 254.446 | 45147206.58 |
| M156T207_1 | 156.0760786 | 207.393 | 1041458047  |
| M156T85    | 156.0765647 | 84.5768 | 94058063.27 |
| M156T435   | 156.0803346 | 434.589 | 1038686.977 |
| M156T488   | 156.0805049 | 488.437 | 1057807.892 |
| M156T305   | 156.0845346 | 304.777 | 5617493.755 |
| M156T38    | 156.1015143 | 38.3208 | 12886357.92 |
| M156T106   | 156.1014411 | 105.503 | 9357005.598 |
| M156T481   | 156.1017008 | 481.042 | 14157357.57 |
| M156T415   | 156.1014819 | 414.82  | 14588044.78 |
| M156T433   | 156.101381  | 433.111 | 18618204.88 |
| M156T293   | 156.1126182 | 292.623 | 149531620.1 |
| M156T747   | 156.1200139 | 746.977 | 53479108.39 |
| M156T756   | 156.120015  | 755.537 | 50856578.73 |
| M156T783   | 156.1193513 | 782.558 | 247138493.4 |
| M156T665   | 156.1378015 | 664.745 | 4347166.601 |
| M156T207_2 | 156.1389405 | 207.393 | 1486703.855 |

|           |              |          |              |
|-----------|--------------|----------|--------------|
| M156T258  | 156. 137898  | 258. 489 | 3560361. 484 |
| M156T674  | 156. 1377755 | 674. 402 | 5036775. 324 |
| M157T324  | 156. 6228727 | 323. 984 | 3704300. 845 |
| M157T39_1 | 156. 9655385 | 39. 4128 | 34229355. 29 |
| M157T133  | 156. 9656342 | 133. 259 | 3099429. 846 |
| M157T66   | 156. 965469  | 65. 7101 | 26730731. 56 |
| M157T211  | 156. 9799559 | 211. 288 | 3499875. 04  |
| M157T45   | 156. 983569  | 45. 3435 | 401941. 388  |
| M157T725  | 156. 9898599 | 725. 212 | 84837901. 8  |
| M157T794  | 156. 9899008 | 793. 649 | 83076506. 71 |
| M157T804  | 156. 9895714 | 804. 327 | 62247188. 86 |
| M157T748  | 156. 9898156 | 748. 486 | 106574794. 5 |
| M157T811  | 156. 9894773 | 811. 413 | 46066907. 67 |
| M157T698  | 156. 989737  | 697. 952 | 32173390. 72 |
| M157T712  | 156. 9898095 | 711. 984 | 73167306. 12 |
| M157T827  | 156. 9895635 | 827. 271 | 45744013. 35 |
| M157T768  | 156. 9897955 | 768. 166 | 116881671. 2 |
| M157T737  | 156. 9897383 | 737. 198 | 80518827. 76 |
| M157T35   | 156. 9896884 | 34. 5397 | 51458783. 98 |
| M157T783  | 156. 989891  | 782. 558 | 84122299. 48 |
| M157T164  | 157. 0127613 | 163. 846 | 199595563. 1 |
| M157T147  | 157. 0127298 | 146. 742 | 16954699. 36 |
| M157T74   | 157. 0145585 | 73. 8324 | 53867042. 07 |
| M157T199  | 157. 01169   | 199. 43  | 56535778. 41 |
| M157T252  | 157. 0201386 | 251. 555 | 15828501. 97 |
| M157T39_2 | 157. 0278635 | 39. 4128 | 3041504. 288 |
| M157T127  | 157. 038605  | 126. 785 | 11464240. 55 |
| M157T403  | 157. 0418101 | 403. 447 | 3812665. 453 |
| M157T101  | 157. 0491285 | 101. 161 | 26919910. 84 |
| M157T308  | 157. 0483615 | 307. 735 | 13792671. 99 |
| M157T144  | 157. 0491505 | 143. 959 | 15586889. 27 |
| M157T328  | 157. 0483858 | 328. 106 | 16839774. 91 |
| M157T283  | 157. 0481665 | 282. 886 | 8884970. 93  |
| M157T42_1 | 157. 0490913 | 41. 798  | 17202657. 69 |
| M157T126  | 157. 049134  | 125. 598 | 26071020. 3  |
| M157T393  | 157. 0566424 | 392. 715 | 104043841. 5 |
| M157T97   | 157. 0603145 | 96. 7698 | 6238427. 777 |
| M157T154  | 157. 0683847 | 153. 785 | 3786410. 688 |
| M157T207  | 157. 0794627 | 207. 393 | 65358525. 79 |
| M157T42_2 | 157. 0848084 | 41. 798  | 10124649. 69 |
| M157T65   | 157. 085292  | 64. 6213 | 8914641. 629 |
| M157T385  | 157. 0854932 | 385. 081 | 6454394. 167 |
| M157T306  | 157. 0967598 | 306. 247 | 8994813. 097 |
| M157T335  | 157. 0967604 | 334. 966 | 9314600. 036 |
| M157T104  | 157. 0966322 | 104. 493 | 15522385. 97 |
| M157T567  | 157. 1007866 | 567. 1   | 9095786. 208 |
| M157T151  | 157. 1079456 | 151. 016 | 5111420. 374 |
| M157T655  | 157. 1219694 | 654. 542 | 1388932. 828 |
| M157T588  | 157. 1219519 | 587. 521 | 7665617. 621 |
| M157T78   | 157. 1694971 | 78. 3841 | 2460740. 429 |
| M158T386  | 157. 5838121 | 386. 352 | 1248046. 665 |
| M158T38_1 | 158. 0021203 | 38. 3208 | 132136184. 7 |
| M158T78   | 158. 0021615 | 78. 3841 | 90156511. 55 |
| M158T72   | 158. 0021936 | 71. 5935 | 132638024. 6 |

|            |             |         |             |
|------------|-------------|---------|-------------|
| M158T164   | 158.0159    | 163.846 | 11342156.9  |
| M158T185_1 | 158.0263508 | 185.398 | 6175281.494 |
| M158T119   | 158.0444115 | 119.433 | 6100848.982 |
| M158T158   | 158.0446633 | 157.773 | 5804382.314 |
| M158T172   | 158.0441824 | 171.935 | 8606629.256 |
| M158T104   | 158.0441545 | 104.493 | 9829189.867 |
| M158T365   | 158.0795595 | 365.061 | 90601038.2  |
| M158T100   | 158.0806981 | 100.146 | 77446408.5  |
| M158T334   | 158.0810167 | 333.715 | 25617125.06 |
| M158T160   | 158.0804431 | 160.369 | 85466675.4  |
| M158T394   | 158.0810442 | 393.934 | 32403031.71 |
| M158T92    | 158.0919111 | 91.7174 | 9042305.175 |
| M158T86    | 158.0919257 | 85.6453 | 63339474.35 |
| M158T185_2 | 158.0921231 | 185.398 | 4732513835  |
| M158T202   | 158.0921023 | 202.149 | 111835823.7 |
| M158T225   | 158.0921583 | 224.729 | 8428839.071 |
| M158T456   | 158.0960979 | 456.126 | 8243965.172 |
| M158T487   | 158.0961042 | 486.885 | 5001918.168 |
| M158T466   | 158.0960511 | 466.162 | 4321428.291 |
| M158T38_2  | 158.1170838 | 38.3208 | 44230082.1  |
| M158T103   | 158.1170754 | 103.423 | 15085420.69 |
| M158T368   | 158.1181799 | 367.949 | 36735093.54 |
| M158T230   | 158.1281512 | 230.321 | 6114788.728 |
| M158T810   | 158.1524171 | 810.052 | 5590346.075 |
| M158T750   | 158.1535631 | 749.96  | 10437541.16 |
| M158T306   | 158.1534058 | 306.247 | 2874225.21  |
| M158T580   | 158.1535671 | 580.22  | 4619465.817 |
| M158T168   | 158.1534149 | 167.804 | 4760782.171 |
| M158T323   | 158.1533811 | 322.536 | 3491752.651 |
| M158T803   | 158.1522732 | 802.88  | 7088888.785 |
| M158T827   | 158.1523763 | 827.271 | 12900790.03 |
| M158T768   | 158.1544823 | 768.166 | 74040926.23 |
| M158T176   | 158.153412  | 175.952 | 10246753.3  |
| M158T37    | 158.4890499 | 37.1891 | 3543579.958 |
| M159T36    | 158.9609646 | 35.8675 | 236419145.8 |
| M159T63    | 158.96099   | 63.4448 | 414912820.6 |
| M159T136   | 158.9602799 | 135.971 | 175068987.9 |
| M159T75    | 158.9715115 | 74.9588 | 30434983.31 |
| M159T711   | 158.9856956 | 710.534 | 27158429.04 |
| M159T68    | 158.9855702 | 68.0903 | 1945569.992 |
| M159T773   | 158.9846686 | 773.437 | 22388151    |
| M159T35    | 158.9856507 | 34.5397 | 18627539.42 |
| M159T69    | 159.0056404 | 69.2834 | 1902869     |
| M159T229   | 159.0280559 | 229.059 | 22965561.24 |
| M159T652   | 159.0283682 | 651.956 | 9659857.854 |
| M159T659   | 159.0282707 | 658.953 | 12774770.23 |
| M159T97    | 159.0280068 | 96.7698 | 9131724.045 |
| M159T672   | 159.0282997 | 671.649 | 5117174.117 |
| M159T218   | 159.0281097 | 217.866 | 11900793.35 |
| M159T256   | 159.0357753 | 255.723 | 1348344.536 |
| M159T98    | 159.0394646 | 97.7824 | 44272959.52 |
| M159T465   | 159.0644155 | 464.668 | 19189548.36 |
| M159T66    | 159.0645632 | 65.7101 | 8101436.154 |
| M159T107   | 159.064789  | 106.513 | 28408997.39 |

|            |             |         |             |
|------------|-------------|---------|-------------|
| M159T335   | 159.0750981 | 334.966 | 633533774.6 |
| M159T143   | 159.0752272 | 142.85  | 26399168.16 |
| M159T91    | 159.0750542 | 90.7088 | 2484897069  |
| M159T110_1 | 159.0752631 | 110.047 | 21958521.63 |
| M159T104   | 159.0760214 | 104.493 | 46707235.48 |
| M159T367   | 159.0840049 | 366.514 | 3551952.433 |
| M159T185   | 159.0950437 | 185.398 | 300077061.2 |
| M159T474   | 159.1012788 | 473.597 | 5836308.109 |
| M159T294   | 159.1121494 | 293.896 | 8774164.71  |
| M159T563   | 159.1160786 | 563.297 | 35597357.05 |
| M159T649   | 159.1162265 | 649.338 | 6592407.417 |
| M159T670   | 159.1162574 | 670.166 | 7828701.915 |
| M159T703   | 159.1162378 | 703.35  | 10950635.48 |
| M159T110_2 | 159.1234837 | 110.047 | 25447420.64 |
| M160T187   | 159.9675539 | 186.709 | 53905630.05 |
| M160T230   | 159.9662305 | 230.321 | 61746197.46 |
| M160T205   | 159.9675747 | 204.747 | 48487443.82 |
| M160T325   | 159.9664284 | 325.35  | 7628952.851 |
| M160T270   | 159.9675415 | 269.528 | 247785537   |
| M160T335_1 | 159.9664559 | 334.966 | 6919255.042 |
| M160T139   | 159.9676086 | 138.766 | 52724087.65 |
| M160T88    | 159.9683958 | 87.6739 | 8683122.865 |
| M160T152   | 159.9689651 | 152.375 | 72896660.73 |
| M160T69    | 159.9696194 | 69.2834 | 190758494.5 |
| M160T218   | 159.9675917 | 217.866 | 77584227.16 |
| M160T240   | 159.9676594 | 239.913 | 58624380.85 |
| M160T51    | 159.9697907 | 51.1942 | 202749657.7 |
| M160T316   | 159.9664179 | 315.701 | 10465984.48 |
| M160T211_1 | 160.0416422 | 211.288 | 2212619.276 |
| M160T163   | 160.0600591 | 162.728 | 17833928.15 |
| M160T106_1 | 160.0600302 | 105.503 | 232466694.8 |
| M160T117   | 160.0589629 | 116.689 | 140081562.1 |
| M160T143_1 | 160.0593704 | 142.85  | 165012113.2 |
| M160T92    | 160.0588186 | 91.7174 | 1116655395  |
| M160T173   | 160.0598769 | 173.407 | 25186070.31 |
| M160T38    | 160.0751359 | 38.3208 | 3834914.322 |
| M160T61    | 160.0751823 | 61.1538 | 7871431.641 |
| M160T335_2 | 160.0741573 | 334.966 | 5326139.223 |
| M160T345   | 160.0744156 | 344.555 | 6703757.889 |
| M160T362   | 160.0742367 | 362.146 | 42325050.63 |
| M160T401   | 160.0753132 | 400.59  | 5412580.852 |
| M160T197   | 160.0786862 | 196.644 | 7999210.47  |
| M160T607   | 160.0751878 | 606.774 | 4933972.907 |
| M160T91    | 160.080264  | 90.7088 | 192334105.8 |
| M160T103   | 160.0961195 | 103.423 | 101941399.6 |
| M160T97    | 160.096073  | 96.7698 | 84107598.12 |
| M160T185   | 160.0962529 | 185.398 | 36538924.42 |
| M160T418   | 160.0962056 | 417.676 | 22536158.62 |
| M160T143_2 | 160.0961194 | 142.85  | 25905355.74 |
| M160T490   | 160.0963429 | 489.826 | 15971200.17 |
| M160T354   | 160.09777   | 353.978 | 18746001.12 |
| M160T81    | 160.1073347 | 80.824  | 3863868.872 |
| M160T211_2 | 160.1076151 | 211.288 | 1445257484  |
| M160T106_2 | 160.1325455 | 105.503 | 12535411.45 |

|            |              |          |              |
|------------|--------------|----------|--------------|
| M160T211_3 | 160. 1739387 | 211. 288 | 1088332. 362 |
| M161T57    | 160. 9651455 | 57. 4179 | 1346826. 874 |
| M161T49    | 160. 9650451 | 48. 7362 | 1623923. 011 |
| M161T69    | 160. 9715564 | 69. 2834 | 3875142. 18  |
| M161T746   | 160. 9829986 | 745. 603 | 3645946. 897 |
| M161T59    | 160. 9863309 | 58. 6151 | 29966861. 36 |
| M161T36    | 161. 0023819 | 35. 8675 | 19794301. 95 |
| M161T65    | 161. 0023512 | 64. 6213 | 10283025. 02 |
| M161T73    | 161. 0290526 | 72. 6708 | 15639866. 72 |
| M161T38    | 161. 0495605 | 38. 3208 | 3172264. 582 |
| M161T293   | 161. 0447714 | 292. 623 | 38130916. 17 |
| M161T180   | 161. 0437776 | 179. 75  | 31242272. 51 |
| M161T100   | 161. 0440161 | 100. 146 | 120588256    |
| M161T160   | 161. 0439956 | 160. 369 | 28175737. 19 |
| M161T143   | 161. 0437773 | 142. 85  | 36615948. 72 |
| M161T331   | 161. 0437052 | 330. 809 | 11642397. 24 |
| M161T198   | 161. 0438256 | 198. 072 | 16928347. 39 |
| M161T430_1 | 161. 0593596 | 430. 131 | 5819658. 488 |
| M161T516   | 161. 0603654 | 516. 214 | 6384607. 234 |
| M161T531   | 161. 0590982 | 531. 127 | 5431451. 786 |
| M161T418   | 161. 0590792 | 417. 676 | 23133151. 65 |
| M161T747   | 161. 0589972 | 746. 977 | 1955506. 454 |
| M161T92    | 161. 0632896 | 91. 7174 | 71885839. 74 |
| M161T234   | 161. 0589398 | 234. 447 | 1194167. 943 |
| M161T608   | 161. 0592563 | 608. 261 | 8568060. 226 |
| M161T260   | 161. 0704594 | 259. 74  | 3745653. 361 |
| M161T91    | 161. 0799148 | 90. 7088 | 12844165. 71 |
| M161T335   | 161. 0802605 | 334. 966 | 6509155. 665 |
| M161T314   | 161. 0920074 | 314. 259 | 33075282. 54 |
| M161T99    | 161. 091537  | 98. 9918 | 66063817. 6  |
| M161T491   | 161. 0991915 | 491. 373 | 1087938. 952 |
| M161T416   | 161. 1071489 | 416. 239 | 7537520. 796 |
| M161T430_2 | 161. 1070353 | 430. 131 | 14152030. 95 |
| M161T211   | 161. 1109145 | 211. 288 | 87729050. 3  |
| M161T574   | 161. 1317387 | 574. 363 | 13503222. 58 |
| M161T669   | 161. 1318605 | 668. 867 | 24695030. 89 |
| M161T649   | 161. 1318265 | 649. 338 | 26167597. 47 |
| M161T461   | 161. 132031  | 460. 537 | 2233830. 775 |
| M161T702   | 161. 1321671 | 702. 055 | 52197254. 46 |
| M161T82    | 161. 1274375 | 82. 0569 | 18782365. 33 |
| M161T562   | 161. 1318548 | 561. 955 | 119677109. 9 |
| M161T728   | 161. 1318996 | 728. 25  | 5990414. 366 |
| M161T545   | 161. 1318127 | 545. 203 | 27275493. 96 |
| M162T284_1 | 161. 5969381 | 284. 377 | 9912591. 563 |
| M162T36    | 162. 0012782 | 35. 8675 | 15045045. 07 |
| M162T61    | 162. 0068574 | 61. 1538 | 12577916. 62 |
| M162T75    | 162. 0066258 | 74. 9588 | 22714912. 24 |
| M162T126   | 162. 0390263 | 125. 598 | 1045042. 603 |
| M162T135   | 162. 0391532 | 134. 574 | 3958544. 868 |
| M162T60    | 162. 0544145 | 59. 9075 | 2576626. 022 |
| M162T332   | 162. 0547071 | 332. 2   | 32446501. 37 |
| M162T320   | 162. 054637  | 319. 758 | 5595210. 232 |
| M162T70    | 162. 0544395 | 70. 3428 | 776371. 1504 |
| M162T279   | 162. 0544344 | 279. 039 | 5207386. 072 |

|            |             |         |             |
|------------|-------------|---------|-------------|
| M162T44    | 162.0543956 | 44.1485 | 4233501.781 |
| M162T435   | 162.0555909 | 434.589 | 6759895.818 |
| M162T481   | 162.0555124 | 481.042 | 4709786.318 |
| M162T469   | 162.0556656 | 469.252 | 6310675.358 |
| M162T212   | 162.0556639 | 212.448 | 4161282.439 |
| M162T203   | 162.0749837 | 203.36  | 24569805.33 |
| M162T98    | 162.0751956 | 97.7824 | 234325000.8 |
| M162T106   | 162.0764452 | 105.503 | 142331336.4 |
| M162T306   | 162.0751113 | 306.247 | 12239062.02 |
| M162T117   | 162.0751236 | 116.689 | 58783305.66 |
| M162T86    | 162.0764474 | 85.6453 | 628468196.9 |
| M162T181   | 162.0748945 | 181.154 | 34464847.23 |
| M162T160   | 162.0764703 | 160.369 | 90972223.24 |
| M162T375   | 162.0909198 | 375.021 | 8996421.694 |
| M162T622   | 162.0906844 | 621.708 | 15877435.22 |
| M162T721   | 162.0908934 | 720.704 | 25351938.28 |
| M162T544   | 162.0908127 | 544.056 | 30565655.24 |
| M162T422   | 162.0909155 | 421.784 | 11226966.61 |
| M162T471   | 162.0909948 | 470.602 | 3655021.276 |
| M162T386   | 162.0908714 | 386.352 | 5463334.392 |
| M162T284_2 | 162.0982607 | 284.377 | 1036324.926 |
| M162T308   | 162.1021932 | 307.735 | 760085.9119 |
| M162T92    | 162.1114487 | 91.7174 | 389191976   |
| M162T191   | 162.1119271 | 190.962 | 3387193.915 |
| M162T104   | 162.1111939 | 104.493 | 33430160.35 |
| M162T211   | 162.1116338 | 211.288 | 4280435.367 |
| M162T107   | 162.1231665 | 106.513 | 178703064   |
| M162T563   | 162.1349491 | 563.297 | 8634327.46  |
| M162T703   | 162.1354409 | 703.35  | 4472874.423 |
| M163T206   | 162.5280984 | 205.903 | 6916320.148 |
| M163T41    | 162.5463997 | 40.6031 | 2896874.492 |
| M163T374   | 162.5465845 | 373.532 | 5173615.796 |
| M163T341   | 162.5464244 | 340.548 | 7740451.54  |
| M163T406_1 | 162.5468569 | 406.289 | 5057362.708 |
| M163T36    | 162.9984016 | 35.8675 | 159368888.5 |
| M163T68    | 162.9983849 | 68.0903 | 55339254.87 |
| M163T121_1 | 163.0070285 | 120.525 | 16593986.35 |
| M163T111   | 163.0069941 | 111.382 | 6212166.007 |
| M163T518   | 163.0392722 | 517.762 | 16132021.01 |
| M163T37    | 163.0384155 | 37.1891 | 16892153.93 |
| M163T388   | 163.039257  | 387.763 | 16308977.38 |
| M163T503   | 163.0393347 | 503.046 | 13606456.27 |
| M163T427   | 163.0393462 | 427.362 | 29545974.95 |
| M163T715   | 163.0384088 | 715.011 | 13729241.57 |
| M163T243   | 163.0498995 | 242.682 | 3892893.81  |
| M163T293   | 163.058845  | 292.623 | 276646907   |
| M163T180   | 163.0585927 | 179.75  | 149063128.4 |
| M163T106   | 163.059305  | 105.503 | 801680468.3 |
| M163T143   | 163.059337  | 142.85  | 207522401.9 |
| M163T95    | 163.059171  | 94.7467 | 729970237.9 |
| M163T772_1 | 163.0596244 | 772.206 | 3799893.065 |
| M163T158   | 163.060586  | 157.773 | 228406581.7 |
| M163T190   | 163.0606575 | 189.571 | 117985382.6 |
| M163T649_1 | 163.0603919 | 649.338 | 103543428.9 |

|            |             |         |             |
|------------|-------------|---------|-------------|
| M163T121_2 | 163.0606166 | 120.525 | 225678247.7 |
| M163T114   | 163.0709732 | 114.15  | 5768016.858 |
| M163T519   | 163.0747783 | 519.257 | 31539129.68 |
| M163T836   | 163.074881  | 836.034 | 14522158.9  |
| M163T810   | 163.0748977 | 810.052 | 14661965.96 |
| M163T139   | 163.0709752 | 138.766 | 6986023.116 |
| M163T625   | 163.0738705 | 624.608 | 18556197.93 |
| M163T215   | 163.0735231 | 215.068 | 10006538.29 |
| M163T384_1 | 163.0749965 | 383.536 | 11450294.52 |
| M163T635   | 163.075033  | 635.022 | 18814025.43 |
| M163T159   | 163.0783795 | 159.017 | 4974877.664 |
| M163T86    | 163.0789298 | 85.6453 | 40320117.39 |
| M163T711   | 163.0757829 | 710.534 | 19916821.07 |
| M163T672   | 163.0761602 | 671.649 | 24251731.77 |
| M163T123   | 163.0709526 | 123.262 | 3014306.451 |
| M163T652   | 163.0748978 | 651.956 | 17015119.55 |
| M163T757   | 163.0756715 | 757.001 | 444972990.4 |
| M163T406_2 | 163.0757854 | 406.289 | 17546250.3  |
| M163T448   | 163.0763171 | 447.531 | 18758209.08 |
| M163T309   | 163.0860961 | 308.967 | 9065237.801 |
| M163T351   | 163.0860249 | 351.348 | 2452941.985 |
| M163T369_1 | 163.0860564 | 369.321 | 7037605.403 |
| M163T187   | 163.0857995 | 186.709 | 4286833.55  |
| M163T336   | 163.0861967 | 336.344 | 6538051.726 |
| M163T384_2 | 163.0860904 | 383.536 | 7211783.905 |
| M163T324   | 163.0860832 | 323.984 | 6586276.307 |
| M163T563   | 163.1112377 | 563.297 | 7214825.792 |
| M163T748   | 163.1108289 | 748.486 | 27467857.77 |
| M163T369_2 | 163.1225345 | 369.321 | 3567688.099 |
| M163T412   | 163.1225385 | 411.838 | 3677890.734 |
| M163T253   | 163.1224009 | 253.024 | 5994254.226 |
| M163T171   | 163.1223576 | 170.665 | 14280295.85 |
| M163T449   | 163.1225483 | 448.978 | 4532898.011 |
| M163T321   | 163.1223345 | 321.198 | 3035418.691 |
| M163T426   | 163.1225575 | 425.909 | 2459921.66  |
| M163T107   | 163.1262168 | 106.513 | 6400622.824 |
| M163T582   | 163.132057  | 581.625 | 27643853.33 |
| M163T42    | 163.1322228 | 41.798  | 11622435.33 |
| M163T62    | 163.1322464 | 62.1777 | 6326414.165 |
| M163T477   | 163.147766  | 476.554 | 880134.8808 |
| M163T791   | 163.1475425 | 790.802 | 6166517.297 |
| M163T669   | 163.1473017 | 668.867 | 35116011.05 |
| M163T649_2 | 163.1475311 | 649.338 | 46872575.81 |
| M163T682   | 163.1473117 | 681.885 | 23868607.89 |
| M163T702   | 163.1473301 | 702.055 | 83746941.26 |
| M163T562   | 163.1475351 | 561.955 | 207658907.6 |
| M163T545   | 163.1474944 | 545.203 | 42711774.74 |
| M163T741   | 163.1475621 | 741.302 | 8429472.862 |
| M163T576   | 163.1474974 | 575.878 | 10896397.86 |
| M163T772_2 | 163.1474322 | 772.206 | 6217387.028 |
| M164T205   | 163.5446875 | 204.747 | 1098481.943 |
| M164T287   | 163.5943091 | 287.148 | 7793213.105 |
| M164T61    | 163.9397018 | 61.1538 | 7029085.118 |
| M164T68    | 163.939685  | 68.0903 | 4066596.154 |



|           |             |         |             |
|-----------|-------------|---------|-------------|
| M164T36_1 | 163.9976699 | 35.8675 | 14332132.07 |
| M164T398  | 163.998174  | 397.878 | 2677229.29  |
| M164T66   | 163.9977    | 65.7101 | 9589562.98  |
| M164T331  | 164.0280724 | 330.809 | 23643230.46 |
| M164T390  | 164.0416918 | 390.432 | 3214866.921 |
| M164T427  | 164.0418005 | 427.362 | 2640139.791 |
| M164T233  | 164.046098  | 233.081 | 13009069.85 |
| M164T302  | 164.0462513 | 302.191 | 4781349.887 |
| M164T724  | 164.065073  | 723.682 | 26291631.13 |
| M164T97   | 164.0629288 | 96.7698 | 94965905.72 |
| M164T181  | 164.0630514 | 181.154 | 7861395.578 |
| M164T733  | 164.0650282 | 732.773 | 35771541.44 |
| M164T760  | 164.0651514 | 759.605 | 89052782.89 |
| M164T477  | 164.0693029 | 476.554 | 33107729.6  |
| M164T686  | 164.069158  | 686.47  | 84453943.96 |
| M164T161  | 164.0698104 | 161.494 | 13307118.46 |
| M164T36_2 | 164.0664648 | 35.8675 | 21491417.79 |
| M164T147  | 164.0699701 | 146.742 | 19182094.14 |
| M164T794  | 164.0652728 | 793.649 | 16770582.8  |
| M164T432  | 164.0693462 | 431.64  | 26671392.15 |
| M164T137  | 164.0699403 | 137.373 | 15770956.89 |
| M164T57   | 164.0684852 | 57.4179 | 7957694.751 |
| M164T74   | 164.0659738 | 73.8324 | 263348652.5 |
| M164T513  | 164.0692199 | 513.285 | 22107132.36 |
| M164T806  | 164.0652031 | 805.823 | 21352243.2  |
| M164T169  | 164.0697732 | 169.221 | 6339946.572 |
| M164T297  | 164.0692624 | 296.739 | 37415610.15 |
| M164T572  | 164.0664688 | 571.523 | 39844146.93 |
| M164T121  | 164.0700003 | 120.525 | 13053096.89 |
| M164T336  | 164.0719698 | 336.344 | 8021488.268 |
| M164T465  | 164.0691804 | 464.668 | 32113669.02 |
| M164T628  | 164.0652785 | 627.58  | 183723140.2 |
| M164T218  | 164.0699232 | 217.866 | 17674190.31 |
| M164T783  | 164.0664574 | 782.558 | 21426793.49 |
| M164T183  | 164.0813389 | 182.574 | 3971950.441 |
| M164T195  | 164.0813417 | 195.23  | 9480888.991 |
| M164T86   | 164.0911006 | 85.6453 | 69592580.16 |
| M164T93   | 164.0909251 | 92.7272 | 487362241   |
| M164T357  | 164.1065194 | 356.74  | 28035550.58 |
| M164T747  | 164.1064492 | 746.977 | 3976519.45  |
| M164T548  | 164.1064176 | 548.114 | 4517223.535 |
| M164T635  | 164.1065944 | 635.022 | 1850193.236 |
| M164T691  | 164.1063326 | 691.022 | 4890470.534 |
| M164T463  | 164.1176245 | 463.271 | 7899993.222 |
| M164T562  | 164.1507969 | 561.955 | 32139519.67 |
| M165T331  | 164.5299312 | 330.809 | 2485006.408 |
| M165T535  | 164.5516477 | 535.329 | 834226.2086 |
| M165T82   | 164.9344506 | 82.0569 | 2850459.344 |
| M165T59   | 164.9476056 | 58.6151 | 2375057.147 |
| M165T69   | 164.9475454 | 69.2834 | 2331159.585 |
| M165T50   | 164.9474828 | 50.041  | 1022649.636 |
| M165T36   | 164.9944199 | 35.8675 | 11457079.63 |
| M165T65   | 164.9944872 | 64.6213 | 9571068.725 |
| M165T519  | 165.0531952 | 519.257 | 25798910.88 |

|            |             |         |             |
|------------|-------------|---------|-------------|
| M165T328   | 165.0531637 | 328.106 | 8368252.083 |
| M165T497   | 165.0530848 | 497.214 | 12187372.93 |
| M165T293   | 165.0532203 | 292.623 | 13800550.21 |
| M165T106   | 165.0540952 | 105.503 | 21743617.57 |
| M165T339   | 165.0532407 | 339.085 | 8097341.754 |
| M165T75_1  | 165.0504204 | 74.9588 | 58850244.6  |
| M165T465   | 165.0532599 | 464.668 | 8387486.755 |
| M165T218   | 165.0529802 | 217.866 | 233324538.5 |
| M165T201   | 165.0540319 | 200.766 | 22582441.42 |
| M165T541   | 165.0691023 | 541.275 | 1779025.665 |
| M165T724   | 165.0674052 | 723.682 | 2738448.543 |
| M165T233_1 | 165.062941  | 233.081 | 955430.151  |
| M165T63    | 165.0661439 | 63.4448 | 2454843.256 |
| M165T75_2  | 165.0661711 | 74.9588 | 28569804.52 |
| M165T530   | 165.0676152 | 529.713 | 2189111.509 |
| M165T102   | 165.0750094 | 102.247 | 48736123.92 |
| M165T114   | 165.0754243 | 114.15  | 19419782.16 |
| M165T143   | 165.0749231 | 142.85  | 9174145.394 |
| M165T169   | 165.0754328 | 169.221 | 2125795.54  |
| M165T123   | 165.0753497 | 123.262 | 8143419.509 |
| M165T43    | 165.0754219 | 43.0471 | 6911227.082 |
| M165T92    | 165.0749031 | 91.7174 | 220592256.5 |
| M165T56    | 165.075442  | 56.1096 | 3257603.122 |
| M165T133   | 165.0753389 | 133.259 | 6707657.581 |
| M165T156   | 165.075426  | 156.393 | 9064136.461 |
| M165T478   | 165.083773  | 477.989 | 2543361.826 |
| M165T453   | 165.091797  | 453.317 | 9478731.157 |
| M165T496   | 165.0907101 | 495.779 | 5759033.558 |
| M165T641   | 165.090487  | 640.717 | 4180855.646 |
| M165T515   | 165.0906973 | 514.727 | 8402297.261 |
| M165T504   | 165.0905502 | 504.466 | 4372877.059 |
| M165T543   | 165.090575  | 542.766 | 3873276.512 |
| M165T332   | 165.1017338 | 332.2   | 6772345.766 |
| M165T500   | 165.1018084 | 500.045 | 7898568.535 |
| M165T343   | 165.1016658 | 343.226 | 4030752.913 |
| M165T233_2 | 165.1018167 | 233.081 | 3357018.882 |
| M165T302   | 165.1053362 | 302.191 | 4694677.78  |
| M165T490   | 165.1017911 | 489.826 | 11004588.17 |
| M165T426   | 165.102015  | 425.909 | 4081314.129 |
| M165T104   | 165.1017142 | 104.493 | 17069537.28 |
| M165T317   | 165.1018449 | 317.199 | 7315387.289 |
| M165T795   | 165.1269051 | 795.165 | 12298713.59 |
| M165T832   | 165.1269566 | 831.709 | 10420490.22 |
| M165T449   | 165.1383477 | 448.978 | 3456896.059 |
| M165T358   | 165.1381438 | 357.958 | 2084370.614 |
| M165T751   | 165.1632118 | 751.333 | 3276994.696 |
| M166T465_1 | 165.5299695 | 464.668 | 1881418.793 |
| M166T384   | 165.6050192 | 383.536 | 951325.2892 |
| M166T725   | 165.9828968 | 725.212 | 36521976.86 |
| M166T36    | 165.9820268 | 35.8675 | 57762092.9  |
| M166T807   | 165.982518  | 807.232 | 94464720.68 |
| M166T736   | 165.9828729 | 735.7   | 48190017.84 |
| M166T768   | 165.9830877 | 768.166 | 123649568.1 |
| M166T787   | 165.9815212 | 786.569 | 158518135.6 |

|            |             |         |             |
|------------|-------------|---------|-------------|
| M166T67    | 165.9824319 | 66.9841 | 22979577.9  |
| M166T744   | 165.982019  | 744.182 | 43460514.51 |
| M166T39    | 165.9970213 | 39.4128 | 4339440.501 |
| M166T65    | 165.9970315 | 64.6213 | 4035858.638 |
| M166T113_1 | 166.0174463 | 112.781 | 2675250.437 |
| M166T165   | 166.0252992 | 165.217 | 56347523.87 |
| M166T390   | 166.0487243 | 390.432 | 53242542.78 |
| M166T382   | 166.0491904 | 382.125 | 31647829.58 |
| M166T92    | 166.0524966 | 91.7174 | 370414399.4 |
| M166T42    | 166.0494658 | 41.798  | 6270662.687 |
| M166T484   | 166.0488131 | 483.973 | 10283927.02 |
| M166T66    | 166.0494469 | 65.7101 | 7453204.734 |
| M166T54    | 166.0494519 | 53.6731 | 7445549.629 |
| M166T148   | 166.0508453 | 148.117 | 65580061.32 |
| M166T218   | 166.0588689 | 217.866 | 22820614.42 |
| M166T393   | 166.0623449 | 392.715 | 96073794.92 |
| M166T75    | 166.0637715 | 74.9588 | 36066138.18 |
| M166T439   | 166.0844247 | 439.021 | 25387503.92 |
| M166T147   | 166.0861357 | 146.742 | 70112541.54 |
| M166T558   | 166.0856144 | 557.967 | 21173353.8  |
| M166T415   | 166.08476   | 414.82  | 51993408.61 |
| M166T345   | 166.0839738 | 344.555 | 5071047850  |
| M166T181   | 166.0853285 | 181.154 | 48445308.42 |
| M166T465_2 | 166.0848225 | 464.668 | 43199695.46 |
| M166T504   | 166.0853017 | 504.466 | 48386141.01 |
| M166T113_2 | 166.0861799 | 112.781 | 146088807.7 |
| M166T209   | 166.0860306 | 208.905 | 38534567.72 |
| M166T176   | 166.0968319 | 175.952 | 41942980.47 |
| M166T328   | 166.097133  | 328.106 | 12144222.84 |
| M166T270   | 166.0968746 | 269.528 | 7849559.102 |
| M166T321   | 166.0971142 | 321.198 | 20812338.36 |
| M166T306   | 166.0961824 | 306.247 | 28086748.85 |
| M166T167   | 166.0968359 | 166.613 | 16096880.12 |
| M166T129   | 166.1201548 | 129.234 | 10273167.62 |
| M166T311   | 166.120398  | 311.445 | 13707720.74 |
| M166T746   | 166.1220731 | 745.603 | 5962409.17  |
| M166T436   | 166.1220466 | 436.069 | 7962030.895 |
| M166T365   | 166.1223262 | 365.061 | 4034942.594 |
| M166T448   | 166.1220712 | 447.531 | 19318805.11 |
| M166T635   | 166.1220973 | 635.022 | 1855432.099 |
| M166T346   | 166.1541119 | 345.848 | 5722405.365 |
| M167T218   | 166.535542  | 217.866 | 2840422.915 |
| M167T465_1 | 166.5488579 | 464.668 | 23629039.14 |
| M167T304   | 166.5541606 | 303.513 | 13519119.56 |
| M167T751   | 166.6121793 | 751.333 | 4501386.142 |
| M167T82    | 166.9499564 | 82.0569 | 16175794.2  |
| M167T725   | 166.9537103 | 725.212 | 5463679.209 |
| M167T794_1 | 166.9537907 | 793.649 | 8375216.773 |
| M167T810   | 166.9537454 | 810.052 | 8886511.393 |
| M167T748_1 | 166.9536833 | 748.486 | 10439598.13 |
| M167T768   | 166.9527843 | 768.166 | 20551824.77 |
| M167T784   | 166.9528155 | 783.78  | 15361071.9  |
| M167T68_1  | 166.9802682 | 68.0903 | 1854225.79  |
| M167T62_1  | 166.9803053 | 62.1777 | 2356867.299 |

|            |             |         |             |
|------------|-------------|---------|-------------|
| M167T50_1  | 166.9824835 | 50.041  | 1559464.955 |
| M167T305   | 166.9822616 | 304.777 | 14542729.16 |
| M167T829_1 | 166.9897377 | 828.73  | 2741718.274 |
| M167T36_1  | 166.9888517 | 35.8675 | 12914170.95 |
| M167T807   | 166.9896762 | 807.232 | 9320413.361 |
| M167T795   | 166.9896757 | 795.165 | 6140671.768 |
| M167T775   | 166.989688  | 774.919 | 7270589.332 |
| M167T818_1 | 166.9896485 | 818.418 | 4834203.871 |
| M167T787   | 166.9896368 | 786.569 | 12109089.82 |
| M167T829_2 | 167.0108781 | 828.73  | 11645220.01 |
| M167T809   | 167.0107268 | 808.678 | 21843488.29 |
| M167T36_2  | 167.0124712 | 35.8675 | 371408344.8 |
| M167T540   | 167.0119676 | 539.764 | 183287391.1 |
| M167T794_2 | 167.0109306 | 793.649 | 53711505.55 |
| M167T558_1 | 167.0124789 | 557.967 | 108041738.6 |
| M167T626   | 167.0111268 | 626.042 | 758782102.2 |
| M167T669   | 167.0124755 | 668.867 | 317360457.4 |
| M167T367_1 | 167.0124948 | 366.514 | 195507238.9 |
| M167T74    | 167.0125302 | 73.8324 | 811710196.5 |
| M167T682   | 167.0124664 | 681.885 | 348195087.1 |
| M167T500   | 167.0106881 | 500.045 | 122220836.9 |
| M167T388   | 167.0124677 | 387.763 | 156860728.8 |
| M167T302   | 167.0119561 | 302.191 | 162168014   |
| M167T401   | 167.0124736 | 400.59  | 207103074.4 |
| M167T818_2 | 167.0109151 | 818.418 | 13573386.1  |
| M167T758   | 167.0110005 | 758.236 | 243443526.5 |
| M167T449   | 167.0106831 | 448.978 | 258362523.1 |
| M167T570   | 167.0124541 | 570.01  | 156052055.6 |
| M167T549   | 167.0124779 | 549.375 | 146680428.5 |
| M167T50_2  | 167.0124818 | 50.041  | 194422036.4 |
| M167T694   | 167.0124788 | 693.81  | 363751198.6 |
| M167T490   | 167.0106717 | 489.826 | 165434255.3 |
| M167T354   | 167.0124991 | 353.978 | 149129648.2 |
| M167T803   | 167.0133895 | 802.88  | 26503346.16 |
| M167T518   | 167.0137921 | 517.762 | 193023641.1 |
| M167T430_1 | 167.013901  | 430.131 | 135101192.4 |
| M167T412   | 167.0138043 | 411.838 | 192111792.5 |
| M167T423   | 167.0139251 | 423.199 | 108839681.4 |
| M167T481   | 167.0137631 | 481.042 | 177799066.9 |
| M167T469   | 167.0138045 | 469.252 | 220704866.5 |
| M167T531   | 167.0137585 | 531.127 | 141295696.4 |
| M167T507   | 167.0137686 | 507.343 | 179253540.3 |
| M167T378   | 167.0138851 | 377.704 | 159353938.8 |
| M167T731   | 167.0132327 | 731.347 | 766243680.6 |
| M167T583   | 167.0137952 | 583.068 | 332999277.4 |
| M167T459   | 167.0336687 | 458.985 | 2637993.673 |
| M167T256_1 | 167.0309112 | 255.723 | 1003057.987 |
| M167T92    | 167.0559999 | 91.7174 | 14297249.34 |
| M167T748_2 | 167.0696901 | 748.486 | 10029871.43 |
| M167T367_2 | 167.0697956 | 366.514 | 9568867.241 |
| M167T69    | 167.0697969 | 69.2834 | 2038794.456 |
| M167T554   | 167.0693337 | 553.936 | 34468115.05 |
| M167T39    | 167.0697771 | 39.4128 | 9284739.326 |
| M167T62_2  | 167.0696982 | 62.1777 | 4942333.002 |

|            |              |          |              |
|------------|--------------|----------|--------------|
| M167T833   | 167. 0697104 | 833. 029 | 4401731. 619 |
| M167T510   | 167. 0706625 | 510. 333 | 11020836. 69 |
| M167T620   | 167. 0698154 | 620. 172 | 32450394. 2  |
| M167T194   | 167. 0723777 | 193. 823 | 4055133. 418 |
| M167T144   | 167. 0810039 | 143. 959 | 10201637. 17 |
| M167T785   | 167. 0812797 | 785. 136 | 2942100. 183 |
| M167T430_2 | 167. 081083  | 430. 131 | 6903048. 135 |
| M167T399   | 167. 0810523 | 399. 046 | 10956725. 62 |
| M167T250   | 167. 0810932 | 250. 144 | 10975862. 59 |
| M167T68_2  | 167. 081094  | 68. 0903 | 4383719. 401 |
| M167T362   | 167. 0811845 | 362. 146 | 11003685. 27 |
| M167T320   | 167. 0810902 | 319. 758 | 10912440. 75 |
| M167T240   | 167. 0810567 | 239. 913 | 14725118. 3  |
| M167T268   | 167. 0868183 | 268. 427 | 9807288. 835 |
| M167T209   | 167. 0869845 | 208. 905 | 2475600. 122 |
| M167T104   | 167. 080836  | 104. 493 | 16570121. 25 |
| M167T183   | 167. 0890985 | 182. 574 | 2454091. 144 |
| M167T345   | 167. 0881976 | 344. 555 | 466752888    |
| M167T465_2 | 167. 0892302 | 464. 668 | 3369650. 657 |
| M167T791   | 167. 1062488 | 790. 802 | 7867128. 819 |
| M167T558_2 | 167. 1059386 | 557. 967 | 41467009. 81 |
| M167T503   | 167. 1059633 | 503. 046 | 41002276. 29 |
| M167T455   | 167. 1052649 | 454. 739 | 13514624. 96 |
| M167T543   | 167. 1052352 | 542. 766 | 166326559. 8 |
| M167T592   | 167. 1064999 | 592. 067 | 15249667. 45 |
| M167T42    | 167. 1061919 | 41. 798  | 12170757. 72 |
| M167T741   | 167. 1061984 | 741. 302 | 13640508. 61 |
| M167T761   | 167. 1062385 | 760. 916 | 8673240. 046 |
| M167T106   | 167. 1171822 | 105. 503 | 7528261. 307 |
| M167T331   | 167. 117455  | 330. 809 | 2768341. 48  |
| M167T471   | 167. 1176559 | 470. 602 | 2679858. 441 |
| M167T256_2 | 167. 1174525 | 255. 723 | 4277803. 923 |
| M167T484   | 167. 1176011 | 483. 973 | 5126930. 011 |
| M167T829_3 | 167. 1425493 | 828. 73  | 15077507. 57 |
| M167T705   | 167. 1426096 | 704. 715 | 6566503. 797 |
| M167T816   | 167. 142554  | 815. 517 | 7986078. 89  |
| M167T36_3  | 167. 4942968 | 35. 8675 | 6628227. 445 |
| M168T635   | 167. 575047  | 635. 022 | 1437265. 159 |
| M168T713_1 | 167. 5933062 | 713. 464 | 874931. 8654 |
| M168T76    | 167. 9628021 | 76. 0874 | 12181841. 16 |
| M168T69    | 167. 9761968 | 69. 2834 | 22822364. 89 |
| M168T298   | 167. 9777306 | 298. 135 | 11654800. 16 |
| M168T136_1 | 167. 9766621 | 135. 971 | 36890408. 23 |
| M168T36_1  | 167. 9813026 | 35. 8675 | 7782453. 089 |
| M168T725   | 167. 997828  | 725. 212 | 25077916     |
| M168T36_2  | 167. 9977601 | 35. 8675 | 12419824. 55 |
| M168T830   | 167. 9979279 | 830. 193 | 6491920. 863 |
| M168T807   | 167. 9978802 | 807. 232 | 28701439. 32 |
| M168T736   | 167. 9978392 | 735. 7   | 51458343. 4  |
| M168T787   | 167. 9983203 | 786. 569 | 55657112. 83 |
| M168T66    | 167. 9968867 | 65. 7101 | 1710788. 534 |
| M168T772   | 167. 9983244 | 772. 206 | 39213667. 66 |
| M168T761   | 167. 9978361 | 760. 916 | 35169618. 18 |
| M168T56_1  | 167. 9966835 | 56. 1096 | 2523675. 618 |

|            |             |         |             |
|------------|-------------|---------|-------------|
| M168T61    | 168.0154263 | 61.1538 | 13204483.1  |
| M168T669   | 168.0156544 | 668.867 | 14491221.64 |
| M168T114   | 168.0128685 | 114.15  | 33326390.5  |
| M168T75    | 168.0148385 | 74.9588 | 31286113.01 |
| M168T215   | 168.0173468 | 215.068 | 3094084.781 |
| M168T136_2 | 168.0170321 | 135.971 | 4636745.447 |
| M168T50    | 168.0153063 | 50.041  | 8452362.484 |
| M168T694   | 168.0156204 | 693.81  | 18130430.74 |
| M168T35    | 168.0146742 | 34.5397 | 21964169.25 |
| M168T82    | 168.0414843 | 82.0569 | 1675190.971 |
| M168T293   | 168.0649981 | 292.623 | 105112981.9 |
| M168T180   | 168.0649775 | 179.75  | 63065123.09 |
| M168T143   | 168.0649526 | 142.85  | 110895299.5 |
| M168T154   | 168.0637125 | 153.785 | 304646661.9 |
| M168T331   | 168.0649992 | 330.809 | 24097966.91 |
| M168T359   | 168.0649395 | 359.32  | 20973907.86 |
| M168T191   | 168.0649432 | 190.962 | 78772595.03 |
| M168T133   | 168.0649411 | 133.259 | 95326230.03 |
| M168T276   | 168.0649845 | 276.414 | 39113427.17 |
| M168T104   | 168.0649251 | 104.493 | 391815732.2 |
| M168T305   | 168.0649432 | 304.777 | 29396016.25 |
| M168T56_2  | 168.0760336 | 56.1096 | 1434239.221 |
| M168T62    | 168.0759975 | 62.1777 | 1280238.464 |
| M168T430   | 168.0735847 | 430.131 | 665823.5991 |
| M168T80    | 168.0760471 | 79.643  | 19076721.27 |
| M168T39    | 168.0761873 | 39.4128 | 2483167.676 |
| M168T249   | 168.0763008 | 248.895 | 36832426.64 |
| M168T332   | 168.076268  | 332.2   | 5561977.745 |
| M168T38    | 168.1013283 | 38.3208 | 4847521.828 |
| M168T184   | 168.1014237 | 183.886 | 19170541.4  |
| M168T106   | 168.1013971 | 105.503 | 4736486.293 |
| M168T676   | 168.1013772 | 675.866 | 3356959.405 |
| M168T339   | 168.1013759 | 339.085 | 10298358.28 |
| M168T527   | 168.1014162 | 526.676 | 5042094.568 |
| M168T324   | 168.1014036 | 323.984 | 7205385.038 |
| M168T232   | 168.1125506 | 231.773 | 4261068.509 |
| M168T338   | 168.1127823 | 337.767 | 9027486.511 |
| M168T327   | 168.1127405 | 326.78  | 31388111.4  |
| M168T713_2 | 168.137641  | 713.464 | 3783894.584 |
| M169T127   | 168.5465605 | 126.785 | 6220281.671 |
| M169T515   | 168.5646771 | 514.727 | 1838711.144 |
| M169T59    | 168.978786  | 58.6151 | 5918115.736 |
| M169T37    | 168.9980546 | 37.1891 | 527414.4328 |
| M169T783   | 168.9984587 | 782.558 | 3017616.812 |
| M169T122   | 169.0071529 | 122.007 | 10684890.78 |
| M169T389   | 169.0130598 | 389.035 | 2984209.916 |
| M169T236   | 169.0127449 | 235.734 | 47691510.47 |
| M169T154_1 | 169.0351193 | 153.785 | 21420171.93 |
| M169T74    | 169.0454009 | 73.8324 | 813949734.2 |
| M169T666   | 169.0485992 | 666.137 | 4446931.332 |
| M169T106   | 169.0488028 | 105.503 | 22219714.28 |
| M169T291   | 169.0488227 | 291.307 | 17915779.73 |
| M169T143   | 169.0486889 | 142.85  | 11630213.28 |
| M169T685   | 169.0486913 | 684.985 | 7201123.514 |

|            |             |         |             |
|------------|-------------|---------|-------------|
| M169T239   | 169.0487128 | 238.605 | 11731584.83 |
| M169T359   | 169.047616  | 359.32  | 12470692.89 |
| M169T42_1  | 169.048966  | 41.798  | 16028733.18 |
| M169T209   | 169.0487728 | 208.905 | 9981729.546 |
| M169T420   | 169.0601547 | 420.274 | 9216803.21  |
| M169T167   | 169.0601134 | 166.613 | 2329058.302 |
| M169T639   | 169.0644428 | 639.219 | 3296611.738 |
| M169T306   | 169.0604369 | 306.247 | 4407221.029 |
| M169T190   | 169.0683407 | 189.571 | 4981643.594 |
| M169T293   | 169.0681908 | 292.623 | 7507117.584 |
| M169T154_2 | 169.068448  | 153.785 | 25267500.02 |
| M169T104   | 169.0681864 | 104.493 | 24787427.94 |
| M169T80    | 169.079324  | 79.643  | 1552739.362 |
| M169T465   | 169.0758374 | 464.668 | 91502090.74 |
| M169T682   | 169.0853035 | 681.885 | 4677474.199 |
| M169T42_2  | 169.0854105 | 41.798  | 5368508.548 |
| M169T66    | 169.0854018 | 65.7101 | 4726529.538 |
| M169T355   | 169.0966689 | 355.41  | 35402377.8  |
| M169T310   | 169.0966111 | 310.075 | 10360071.27 |
| M169T286   | 169.0966824 | 285.9   | 7834189.7   |
| M169T346   | 169.0966643 | 345.848 | 79195666.99 |
| M169T371   | 169.0957869 | 370.777 | 12780838.63 |
| M169T382   | 169.0957775 | 382.125 | 7617953.333 |
| M169T318   | 169.0966398 | 318.497 | 7886780.685 |
| M169T456   | 169.1224273 | 456.126 | 36822140.28 |
| M169T598   | 169.1212974 | 598.125 | 43465328.71 |
| M169T336   | 169.1218481 | 336.344 | 6645590.879 |
| M169T487   | 169.1214283 | 486.885 | 22201530.17 |
| M169T396   | 169.1217392 | 396.415 | 39148094.95 |
| M169T347   | 169.121738  | 347.175 | 6590789.316 |
| M170T176_1 | 169.5360154 | 175.952 | 12634016.43 |
| M170T393   | 169.5813123 | 392.715 | 24088219.68 |
| M170T309   | 169.5998922 | 308.967 | 3767661.161 |
| M170T66    | 169.9744393 | 65.7101 | 48878494.24 |
| M170T36_1  | 169.976991  | 35.8675 | 135621111.1 |
| M170T148   | 169.9766925 | 148.117 | 11834669.63 |
| M170T36_2  | 169.9970495 | 35.8675 | 10465782.67 |
| M170T65    | 169.9968193 | 64.6213 | 5705690.914 |
| M170T163   | 170.0443078 | 162.728 | 3724175.563 |
| M170T75_1  | 170.0459442 | 74.9588 | 93024982.06 |
| M170T209   | 170.044041  | 208.905 | 11063324.98 |
| M170T222   | 170.0442901 | 222.017 | 23032867.8  |
| M170T530   | 170.064678  | 529.713 | 3298171.478 |
| M170T75_2  | 170.0654702 | 74.9588 | 32562013.82 |
| M170T369   | 170.0800985 | 369.321 | 49806387.37 |
| M170T180   | 170.0800331 | 179.75  | 170011406.3 |
| M170T250   | 170.0801135 | 250.144 | 12380064.4  |
| M170T401   | 170.0800637 | 400.59  | 23401294.13 |
| M170T465   | 170.0800017 | 464.668 | 13033806.39 |
| M170T299   | 170.0800609 | 299.493 | 13915653.31 |
| M170T411   | 170.0802731 | 410.542 | 68586132.77 |
| M170T106_1 | 170.0805639 | 105.503 | 104261682   |
| M170T143   | 170.080617  | 142.85  | 32939781.51 |
| M170T169   | 170.0803261 | 169.221 | 122332023.5 |

|            |             |         |             |
|------------|-------------|---------|-------------|
| M170T440   | 170.0816592 | 440.459 | 18872654.56 |
| M170T324   | 170.0816141 | 323.984 | 23566379.83 |
| M170T176_2 | 170.0916889 | 175.952 | 9677426.567 |
| M170T240   | 170.0915869 | 239.913 | 14328621.53 |
| M170T106_2 | 170.0917773 | 105.503 | 9236076.723 |
| M170T833   | 170.0958242 | 833.029 | 334677370.6 |
| M170T32    | 170.0957992 | 32.4171 | 5108766.342 |
| M170T487   | 170.0959667 | 486.885 | 4061359.28  |
| M170T37    | 170.117112  | 37.1891 | 3150080.675 |
| M170T103   | 170.116799  | 103.423 | 8220392.636 |
| M170T488   | 170.1169938 | 488.437 | 10556921.23 |
| M170T69    | 170.1168997 | 69.2834 | 1776452.286 |
| M170T215   | 170.1170118 | 215.068 | 11167172.92 |
| M170T372   | 170.1271097 | 372.152 | 23231514.11 |
| M170T456   | 170.1254087 | 456.126 | 3623288.662 |
| M170T598   | 170.1252086 | 598.125 | 3884305.052 |
| M170T343   | 170.1276377 | 343.226 | 106359960   |
| M170T348   | 170.1536696 | 348.488 | 138181861.4 |
| M170T388   | 170.1536893 | 387.763 | 19073973.55 |
| M170T552   | 170.1533938 | 552.452 | 3308779.206 |
| M170T364   | 170.152495  | 363.58  | 135682554.1 |
| M170T761   | 170.1532937 | 760.916 | 9132054.225 |
| M170T36_3  | 170.4687638 | 35.8675 | 2484156.044 |
| M171T394   | 170.5798769 | 393.934 | 2844941.941 |
| M171T36    | 170.9603918 | 35.8675 | 2182799.428 |
| M171T60    | 170.9755081 | 59.9075 | 10606776.56 |
| M171T263   | 170.9755896 | 262.529 | 834568.0905 |
| M171T148   | 170.9759691 | 148.117 | 10587771.81 |
| M171T35_1  | 171.0051948 | 34.5397 | 4590993.746 |
| M171T41    | 171.0051976 | 40.6031 | 6372401.818 |
| M171T57    | 171.0050118 | 57.4179 | 2704655.23  |
| M171T65    | 171.0051648 | 64.6213 | 3885050.872 |
| M171T694   | 171.0049847 | 693.81  | 7616037.96  |
| M171T76    | 171.0050387 | 76.0874 | 5492652.856 |
| M171T86    | 171.0165912 | 85.6453 | 46314721.5  |
| M171T240   | 171.0124839 | 239.913 | 2395608.958 |
| M171T274   | 171.0257473 | 273.531 | 7685819.041 |
| M171T422   | 171.02823   | 421.784 | 9345702.058 |
| M171T219   | 171.0276805 | 219.233 | 9408235.53  |
| M171T688   | 171.0338998 | 687.95  | 15945644.53 |
| M171T698   | 171.0339464 | 697.952 | 9392682.88  |
| M171T642   | 171.0339283 | 642.211 | 17680141.55 |
| M171T674   | 171.0338538 | 674.402 | 17501371.96 |
| M171T655   | 171.0339219 | 654.542 | 9273387.826 |
| M171T35_2  | 171.0338685 | 34.5397 | 14309928.72 |
| M171T74    | 171.0427057 | 73.8324 | 110142599.5 |
| M171T69    | 171.0646278 | 69.2834 | 1423910.844 |
| M171T63_1  | 171.0645492 | 63.4448 | 2087489.101 |
| M171T432   | 171.0646337 | 431.64  | 10801155.26 |
| M171T623   | 171.0646036 | 623.11  | 24733932.59 |
| M171T343   | 171.0646742 | 343.226 | 8658944.393 |
| M171T577   | 171.0645407 | 577.366 | 4659759.206 |
| M171T43    | 171.0645499 | 43.0471 | 5815660.832 |
| M171T458   | 171.0646466 | 457.576 | 4744310.103 |



|            |             |         |             |
|------------|-------------|---------|-------------|
| M171T382   | 171.0645551 | 382.125 | 11209641.34 |
| M171T396   | 171.0647393 | 396.415 | 4461509.295 |
| M171T361   | 171.064601  | 360.794 | 15962123.93 |
| M171T56    | 171.0645378 | 56.1096 | 2593108.514 |
| M171T614   | 171.0645918 | 614.215 | 42798023.96 |
| M171T597   | 171.0644127 | 596.628 | 11579886.42 |
| M171T102   | 171.0757873 | 102.247 | 14258514.6  |
| M171T760   | 171.07669   | 759.605 | 6217865.326 |
| M171T176   | 171.0757461 | 175.952 | 70559993.53 |
| M171T411   | 171.0841096 | 410.542 | 5061176.877 |
| M171T345   | 171.0758815 | 344.555 | 4929732.186 |
| M171T443   | 171.0924779 | 443.256 | 9083537.162 |
| M171T833_1 | 171.0987937 | 833.029 | 39876930.84 |
| M171T309   | 171.1003494 | 308.967 | 5955567.495 |
| M171T574   | 171.1009559 | 574.363 | 8902913.593 |
| M171T816   | 171.1009361 | 815.517 | 12535961.09 |
| M171T110   | 171.1011782 | 110.047 | 1614088.431 |
| M171T685   | 171.1009692 | 684.985 | 6857305.227 |
| M171T133   | 171.1010932 | 133.259 | 9825584.064 |
| M171T184   | 171.112201  | 183.886 | 8212627.141 |
| M171T389   | 171.1123364 | 389.035 | 20774092.26 |
| M171T145   | 171.1122364 | 145.382 | 6991247.024 |
| M171T215   | 171.1121304 | 215.068 | 8774863.191 |
| M171T402   | 171.1126552 | 401.963 | 6905120.846 |
| M171T107   | 171.1123106 | 106.513 | 19856438.43 |
| M171T266   | 171.1233638 | 265.624 | 10080823.06 |
| M171T31_1  | 171.1375618 | 31.4047 | 3313667.549 |
| M171T63_2  | 171.1374214 | 63.4448 | 15432909.1  |
| M171T509   | 171.1374351 | 508.883 | 15778543.34 |
| M171T118   | 171.1375437 | 118.116 | 11560498.82 |
| M171T603   | 171.1484227 | 602.513 | 19082012.77 |
| M171T622   | 171.1484281 | 621.708 | 52408027.68 |
| M171T794   | 171.1484133 | 793.649 | 29102295.65 |
| M171T644   | 171.1484157 | 643.727 | 23171619.58 |
| M171T31_2  | 171.1482314 | 31.4047 | 50470110.76 |
| M171T824   | 171.1484056 | 824.311 | 32570550.99 |
| M171T833_2 | 171.1484106 | 833.029 | 28426214.34 |
| M171T811   | 171.1483867 | 811.413 | 39146216.68 |
| M171T673   | 171.1484323 | 672.956 | 170731096.7 |
| M171T751   | 171.1484367 | 751.333 | 151631072.2 |
| M171T803   | 171.1484038 | 802.88  | 24365471.06 |
| M171T635   | 171.1484594 | 635.022 | 28335039.42 |
| M171T783   | 171.1483935 | 782.558 | 29992056.43 |
| M171T362   | 171.1566666 | 362.146 | 13993035.67 |
| M172T206   | 171.5334381 | 205.903 | 26316135.47 |
| M172T33    | 171.9590403 | 33.467  | 3269842.074 |
| M172T36_1  | 171.9924317 | 35.8675 | 180375140.5 |
| M172T74_1  | 171.9907128 | 73.8324 | 143691192.4 |
| M172T154   | 171.9922598 | 153.785 | 13588425.06 |
| M172T135   | 171.9927516 | 134.574 | 26108420.21 |
| M172T332   | 172.0146659 | 332.2   | 2003117.285 |
| M172T232   | 172.0324756 | 231.773 | 3181220.78  |
| M172T74_2  | 172.045122  | 73.8324 | 8409407.277 |
| M172T163   | 172.0598677 | 162.728 | 18537355.85 |

|            |              |          |              |
|------------|--------------|----------|--------------|
| M172T122   | 172. 0598544 | 122. 007 | 7100259. 319 |
| M172T180   | 172. 0598456 | 179. 75  | 9888014. 786 |
| M172T143   | 172. 0598401 | 142. 85  | 20534439. 62 |
| M172T197   | 172. 059835  | 196. 644 | 32346651. 26 |
| M172T573   | 172. 0598008 | 573. 072 | 1076978. 771 |
| M172T329   | 172. 0604837 | 329. 481 | 4886552. 979 |
| M172T519   | 172. 0964671 | 519. 257 | 25880388. 65 |
| M172T440   | 172. 0964428 | 440. 459 | 13192487. 59 |
| M172T104   | 172. 0962371 | 104. 493 | 77344121. 36 |
| M172T240   | 172. 1074614 | 239. 913 | 158358036. 4 |
| M172T181   | 172. 1184797 | 181. 154 | 89396477. 66 |
| M172T194   | 172. 1181825 | 193. 823 | 169319665. 8 |
| M172T603   | 172. 1326883 | 602. 513 | 4619338. 803 |
| M172T36_2  | 172. 1325484 | 35. 8675 | 2614276. 471 |
| M172T522   | 172. 1326132 | 522. 177 | 54900807. 09 |
| M172T432   | 172. 1326195 | 431. 64  | 57158488. 22 |
| M172T420   | 172. 1326878 | 420. 274 | 18242995. 84 |
| M172T110   | 172. 1313698 | 110. 047 | 9227528. 146 |
| M172T313   | 172. 1326519 | 312. 85  | 14663164. 4  |
| M172T567   | 172. 1325804 | 567. 1   | 4651877. 104 |
| M172T456   | 172. 1517319 | 456. 126 | 2390003. 6   |
| M172T42    | 172. 1516651 | 41. 798  | 4815591. 079 |
| M172T62    | 172. 1516641 | 62. 1777 | 9159186. 966 |
| M172T788   | 172. 1690434 | 787. 856 | 110411833. 9 |
| M172T36_3  | 172. 4871606 | 35. 8675 | 1567218. 597 |
| M173T698   | 172. 9558301 | 697. 952 | 7624554. 734 |
| M173T69_1  | 172. 9559302 | 69. 2834 | 25636386. 29 |
| M173T133   | 172. 9559731 | 133. 259 | 7851867. 768 |
| M173T35    | 172. 9559436 | 34. 5397 | 67528660. 51 |
| M173T116   | 172. 9766408 | 115. 522 | 20601076. 24 |
| M173T66_1  | 172. 9765248 | 65. 7101 | 21402132. 19 |
| M173T38    | 172. 993713  | 38. 3208 | 7329644. 322 |
| M173T63    | 172. 9937769 | 63. 4448 | 2913760. 06  |
| M173T93    | 173. 0203473 | 92. 7272 | 27280755. 1  |
| M173T331   | 173. 0334364 | 330. 809 | 13631190. 03 |
| M173T100   | 173. 0438634 | 100. 146 | 15075624. 95 |
| M173T104_1 | 173. 0552119 | 104. 493 | 10334405. 4  |
| M173T233   | 173. 0516921 | 233. 081 | 18761397. 24 |
| M173T301   | 173. 0515331 | 300. 782 | 7297673. 203 |
| M173T197   | 173. 0630892 | 196. 644 | 1662408. 808 |
| M173T348   | 173. 0803912 | 348. 488 | 3732398. 787 |
| M173T41    | 173. 080586  | 40. 6031 | 3356061. 168 |
| M173T378   | 173. 0804195 | 377. 704 | 2952845. 959 |
| M173T51    | 173. 0804454 | 51. 1942 | 3802345. 499 |
| M173T66_2  | 173. 0805294 | 65. 7101 | 4028560. 176 |
| M173T538   | 173. 0915398 | 538. 316 | 3104727. 222 |
| M173T121   | 173. 0917322 | 120. 525 | 6366920. 376 |
| M173T91    | 173. 0915278 | 90. 7088 | 52034154. 29 |
| M173T176   | 173. 0916731 | 175. 952 | 6451325. 243 |
| M173T104_2 | 173. 0916554 | 104. 493 | 55922794. 98 |
| M173T129   | 173. 102636  | 129. 234 | 3025699. 135 |
| M173T567   | 173. 0953083 | 567. 1   | 2362090. 962 |
| M173T472   | 173. 1070413 | 472. 132 | 5825680. 937 |
| M173T365   | 173. 1068293 | 365. 061 | 17405365. 82 |

|            |              |          |              |
|------------|--------------|----------|--------------|
| M173T385   | 173. 1068582 | 385. 081 | 1011607. 629 |
| M173T69_2  | 173. 1166028 | 69. 2834 | 1093005. 121 |
| M173T62    | 173. 1166352 | 62. 1777 | 2652873. 451 |
| M173T320   | 173. 1151784 | 319. 758 | 16802692. 55 |
| M173T240   | 173. 1108799 | 239. 913 | 10396630. 14 |
| M173T183   | 173. 1221037 | 182. 574 | 4240189. 289 |
| M173T194   | 173. 1222239 | 193. 823 | 9263807. 441 |
| M173T669   | 173. 1318072 | 668. 867 | 4484578. 673 |
| M173T680   | 173. 130824  | 680. 402 | 3834907. 361 |
| M173T702   | 173. 1309129 | 702. 055 | 9230774. 755 |
| M173T248   | 173. 1279624 | 247. 692 | 3128318. 216 |
| M173T562   | 173. 1319248 | 561. 955 | 45013312. 88 |
| M173T545   | 173. 1318024 | 545. 203 | 12525213. 99 |
| M173T347   | 173. 1278586 | 347. 175 | 6157602. 681 |
| M173T522   | 173. 1360301 | 522. 177 | 4448424. 534 |
| M173T191   | 173. 1390286 | 190. 962 | 16587163. 56 |
| M173T496   | 173. 1533195 | 495. 779 | 2214878. 649 |
| M173T488   | 173. 1532718 | 488. 437 | 4298268. 291 |
| M173T445   | 173. 1532095 | 444. 725 | 6163494. 922 |
| M174T202   | 173. 525298  | 202. 149 | 10176122. 28 |
| M174T216   | 173. 5253425 | 216. 359 | 12105549. 71 |
| M174T331   | 173. 562136  | 330. 809 | 1652515. 596 |
| M174T338   | 173. 5620968 | 337. 767 | 2177814. 319 |
| M174T124   | 174. 0174135 | 124. 487 | 10515272. 92 |
| M174T74    | 174. 0241005 | 73. 8324 | 197572707. 3 |
| M174T147   | 174. 033659  | 146. 742 | 3528534. 664 |
| M174T100_1 | 174. 0391104 | 100. 146 | 49348550. 26 |
| M174T123_1 | 174. 0390675 | 123. 262 | 13549429. 91 |
| M174T92    | 174. 0390631 | 91. 7174 | 19020441. 11 |
| M174T278   | 174. 0443148 | 277. 699 | 5624057. 239 |
| M174T494   | 174. 0546383 | 494. 289 | 1130893. 3   |
| M174T183   | 174. 075486  | 182. 574 | 30411855. 5  |
| M174T100_2 | 174. 0753058 | 100. 146 | 243855661. 1 |
| M174T210   | 174. 0743591 | 210. 186 | 13129559. 42 |
| M174T152   | 174. 0752363 | 152. 375 | 388162554. 5 |
| M174T132   | 174. 0752459 | 131. 949 | 195181753. 4 |
| M174T301   | 174. 0760418 | 300. 782 | 13276990. 21 |
| M174T325   | 174. 0888799 | 325. 35  | 5247561. 519 |
| M174T123_2 | 174. 0867487 | 123. 262 | 572872071. 9 |
| M174T384   | 174. 0905857 | 383. 536 | 7643651. 765 |
| M174T104   | 174. 0867497 | 104. 493 | 870594095. 9 |
| M174T359   | 174. 0944137 | 359. 32  | 10607912. 4  |
| M174T38    | 174. 1118363 | 38. 3208 | 4189563. 544 |
| M174T369   | 174. 1125167 | 369. 321 | 5413852. 552 |
| M174T163   | 174. 1120946 | 162. 728 | 68067942. 96 |
| M174T143   | 174. 1118825 | 142. 85  | 28438633. 54 |
| M174T401   | 174. 1121336 | 400. 59  | 6197410. 065 |
| M174T504   | 174. 1121226 | 504. 466 | 29295207. 4  |
| M174T471   | 174. 1120782 | 470. 602 | 11247754. 39 |
| M174T107   | 174. 11236   | 106. 513 | 59284202. 47 |
| M174T171   | 174. 1230549 | 170. 665 | 3839161. 742 |
| M174T266   | 174. 1230801 | 265. 624 | 11075160. 11 |
| M174T148   | 174. 1232335 | 148. 117 | 1305913. 805 |
| M174T77    | 174. 1342614 | 77. 2391 | 3023973. 95  |

|            |              |          |              |
|------------|--------------|----------|--------------|
| M175T121   | 174. 5154117 | 120. 525 | 12188308. 18 |
| M175T111   | 174. 5155356 | 111. 382 | 4597756. 042 |
| M175T751_1 | 174. 6009354 | 751. 333 | 24398287. 62 |
| M175T82    | 174. 937258  | 82. 0569 | 9757165. 969 |
| M175T38    | 174. 9537264 | 38. 3208 | 31715449. 64 |
| M175T61    | 174. 9537423 | 61. 1538 | 11971655. 97 |
| M175T724   | 174. 9543655 | 723. 682 | 5733015      |
| M175T69    | 174. 9537619 | 69. 2834 | 8003627. 042 |
| M175T321   | 174. 9528521 | 321. 198 | 1279655. 341 |
| M175T46    | 174. 9761149 | 46. 447  | 7675144. 816 |
| M175T68    | 174. 9760831 | 68. 0903 | 2024984. 233 |
| M175T211   | 174. 9908902 | 211. 288 | 8287550. 792 |
| M175T164   | 175. 0231861 | 163. 846 | 320255386. 7 |
| M175T241   | 175. 0272566 | 241. 368 | 11319217. 73 |
| M175T206   | 175. 0527369 | 205. 903 | 2379402. 924 |
| M175T101   | 175. 0596613 | 101. 161 | 16669238. 15 |
| M175T159   | 175. 0529995 | 159. 017 | 9595284. 357 |
| M175T299   | 175. 0596311 | 299. 493 | 7521312. 761 |
| M175T686_1 | 175. 0747496 | 686. 47  | 3139680. 748 |
| M175T711   | 175. 0750102 | 710. 534 | 4797055. 075 |
| M175T488   | 175. 0750961 | 488. 437 | 1869266. 066 |
| M175T600   | 175. 0787673 | 599. 621 | 977766. 7616 |
| M175T531   | 175. 0776809 | 531. 127 | 1000140. 926 |
| M175T151   | 175. 0770343 | 151. 016 | 32300293. 36 |
| M175T137_1 | 175. 0889136 | 137. 373 | 5408293. 375 |
| M175T388   | 175. 0843086 | 387. 763 | 25302000. 91 |
| M175T331   | 175. 0841275 | 330. 809 | 229665460    |
| M175T104   | 175. 0887753 | 104. 493 | 51329645. 14 |
| M175T455   | 175. 0962272 | 454. 739 | 3025956. 628 |
| M175T123   | 175. 0903686 | 123. 262 | 35751247. 58 |
| M175T42_1  | 175. 0960782 | 41. 798  | 1967044. 625 |
| M175T67    | 175. 095747  | 66. 9841 | 1193365. 29  |
| M175T686_2 | 175. 1111772 | 686. 47  | 2831634. 11  |
| M175T167   | 175. 1072317 | 166. 613 | 32244029. 48 |
| M175T103   | 175. 1066535 | 103. 423 | 179684750. 1 |
| M175T824   | 175. 1111427 | 824. 311 | 5640119. 965 |
| M175T775   | 175. 1113634 | 774. 919 | 7503052. 972 |
| M175T232   | 175. 1074553 | 231. 773 | 15107837. 88 |
| M175T110   | 175. 1172272 | 110. 047 | 51938061. 98 |
| M175T375   | 175. 1193906 | 375. 021 | 11694713. 48 |
| M175T137_2 | 175. 1169598 | 137. 373 | 16783951. 42 |
| M175T310   | 175. 1195498 | 310. 075 | 25117536. 73 |
| M175T86    | 175. 116612  | 85. 6453 | 16922016218  |
| M175T323   | 175. 119481  | 322. 536 | 27317844. 1  |
| M175T577   | 175. 1189065 | 577. 366 | 8269410. 93  |
| M175T341   | 175. 1195358 | 340. 548 | 13890243. 18 |
| M175T118   | 175. 1170955 | 118. 116 | 15022703. 98 |
| M175T188   | 175. 117311  | 188. 126 | 11668641. 14 |
| M175T589   | 175. 1186499 | 589. 053 | 4717141. 215 |
| M175T284   | 175. 1177492 | 284. 377 | 16212737. 11 |
| M175T148   | 175. 1175744 | 148. 117 | 21097091. 21 |
| M175T163   | 175. 1174136 | 162. 728 | 22827532. 33 |
| M175T102   | 175. 1171254 | 102. 247 | 31741156. 4  |
| M175T461   | 175. 1236686 | 460. 537 | 4177404. 611 |

|            |              |          |              |
|------------|--------------|----------|--------------|
| M175T503   | 175. 1231832 | 503. 046 | 1162655. 799 |
| M175T446   | 175. 1238949 | 445. 984 | 132281092. 8 |
| M175T669   | 175. 1475504 | 668. 867 | 10712995. 37 |
| M175T649   | 175. 1475001 | 649. 338 | 11454267. 55 |
| M175T682   | 175. 1475425 | 681. 885 | 7345556. 443 |
| M175T702   | 175. 1475424 | 702. 055 | 21443488. 67 |
| M175T562   | 175. 1473234 | 561. 955 | 44962331. 68 |
| M175T751_2 | 175. 1475528 | 751. 333 | 18346467. 88 |
| M175T545   | 175. 1476233 | 545. 203 | 16445590. 36 |
| M175T42_2  | 175. 1476096 | 41. 798  | 7547832. 852 |
| M175T81    | 175. 1546463 | 80. 824  | 3832353. 792 |
| M176T453   | 175. 548868  | 453. 317 | 4221602. 096 |
| M176T72    | 176. 0126092 | 71. 5935 | 33165493. 08 |
| M176T78    | 176. 0133604 | 78. 3841 | 22171578. 32 |
| M176T41    | 176. 0127003 | 40. 6031 | 29397126. 21 |
| M176T133   | 176. 0128074 | 133. 259 | 5268544. 613 |
| M176T164   | 176. 0263835 | 163. 846 | 18420571. 02 |
| M176T91_1  | 176. 0265573 | 90. 7088 | 13085499. 47 |
| M176T420   | 176. 041286  | 420. 274 | 7301418. 403 |
| M176T101   | 176. 0547672 | 101. 161 | 5274930. 907 |
| M176T147   | 176. 0547459 | 146. 742 | 13306400. 94 |
| M176T205   | 176. 0547977 | 204. 747 | 14900360. 5  |
| M176T172   | 176. 0546053 | 171. 935 | 18198402. 93 |
| M176T540   | 176. 0699793 | 539. 764 | 5536894. 155 |
| M176T708   | 176. 070183  | 707. 557 | 8418154. 34  |
| M176T430   | 176. 0704108 | 430. 131 | 13003254. 21 |
| M176T98    | 176. 0667639 | 97. 7824 | 103031582. 7 |
| M176T554   | 176. 0707155 | 553. 936 | 5786078. 377 |
| M176T389   | 176. 0702129 | 389. 035 | 4755998. 851 |
| M176T633   | 176. 0700795 | 633. 476 | 6263197. 643 |
| M176T455   | 176. 0703987 | 454. 739 | 6325622. 678 |
| M176T378   | 176. 0691197 | 377. 704 | 12607147. 96 |
| M176T43    | 176. 0701218 | 43. 0471 | 7226766. 926 |
| M176T601   | 176. 0700222 | 601. 04  | 4891603. 296 |
| M176T69    | 176. 0700497 | 69. 2834 | 1752197. 812 |
| M176T359   | 176. 0695038 | 359. 32  | 94790688. 95 |
| M176T484   | 176. 068244  | 483. 973 | 6676293. 514 |
| M176T574   | 176. 073584  | 574. 363 | 3086967. 532 |
| M176T226   | 176. 0911746 | 226. 202 | 38138042. 93 |
| M176T161   | 176. 0909241 | 161. 494 | 9479047. 498 |
| M176T306   | 176. 091694  | 306. 247 | 6319882. 902 |
| M176T282   | 176. 0911869 | 281. 666 | 11638076. 14 |
| M176T297   | 176. 0911765 | 296. 739 | 9440119. 23  |
| M176T143   | 176. 0914256 | 142. 85  | 54225580. 9  |
| M176T123   | 176. 0910156 | 123. 262 | 34083520. 91 |
| M176T104_1 | 176. 091612  | 104. 493 | 133501124. 4 |
| M176T152   | 176. 1022881 | 152. 375 | 4845025. 757 |
| M176T91_2  | 176. 1016435 | 90. 7088 | 8847720663   |
| M176T121   | 176. 1034741 | 120. 525 | 26605931. 79 |
| M176T487   | 176. 1066741 | 486. 885 | 3275806. 647 |
| M176T104_2 | 176. 103014  | 104. 493 | 173480206. 2 |
| M176T232_1 | 176. 1105496 | 231. 773 | 669680. 9748 |
| M176T85    | 176. 1215964 | 84. 5768 | 1018694042   |
| M176T104_3 | 176. 1274022 | 104. 493 | 32680482. 92 |

|            |              |          |              |
|------------|--------------|----------|--------------|
| M176T219   | 176. 1275107 | 219. 233 | 3398717. 973 |
| M176T232_2 | 176. 13884   | 231. 773 | 7978777. 086 |
| M176T341   | 176. 1388205 | 340. 548 | 16764906. 72 |
| M176T92    | 176. 1794418 | 91. 7174 | 6983553. 199 |
| M177T313   | 176. 6019764 | 312. 85  | 10974837. 67 |
| M177T185   | 176. 9714771 | 185. 398 | 11057934. 95 |
| M177T135_1 | 176. 9714247 | 134. 574 | 25005087. 35 |
| M177T69    | 176. 9709699 | 69. 2834 | 38911077. 2  |
| M177T298   | 176. 972238  | 298. 135 | 12340901. 36 |
| M177T113   | 177. 0225238 | 112. 781 | 21884658. 52 |
| M177T372   | 177. 0304034 | 372. 152 | 1501919. 116 |
| M177T165   | 177. 0270958 | 165. 217 | 2000535. 26  |
| M177T497   | 177. 0528108 | 497. 214 | 16495868. 15 |
| M177T102   | 177. 0502571 | 102. 247 | 19454985. 03 |
| M177T111   | 177. 0500606 | 111. 382 | 12665494. 08 |
| M177T137   | 177. 0500329 | 137. 373 | 6261323. 095 |
| M177T451   | 177. 0526106 | 450. 503 | 78340531. 6  |
| M177T513   | 177. 0543572 | 513. 285 | 44584742. 97 |
| M177T128   | 177. 0502412 | 127. 944 | 8437422. 105 |
| M177T118   | 177. 0500318 | 118. 116 | 19771307. 71 |
| M177T538   | 177. 0528623 | 538. 316 | 20645199. 14 |
| M177T709   | 177. 0546941 | 709. 106 | 11937396. 77 |
| M177T548   | 177. 0543893 | 548. 114 | 29695076. 32 |
| M177T89    | 177. 0493653 | 88. 6838 | 627934644    |
| M177T792   | 177. 0540372 | 792. 146 | 5673749. 556 |
| M177T608   | 177. 0540313 | 608. 261 | 21782790. 24 |
| M177T327   | 177. 0540214 | 326. 78  | 6114992. 731 |
| M177T699   | 177. 0540345 | 699. 389 | 9425469. 034 |
| M177T386   | 177. 0540531 | 386. 352 | 12093868. 75 |
| M177T206   | 177. 0577075 | 205. 903 | 942207. 6274 |
| M177T163   | 177. 0748387 | 162. 728 | 6052093. 464 |
| M177T147   | 177. 0751055 | 146. 742 | 19733194. 46 |
| M177T190   | 177. 0752714 | 189. 571 | 5761878. 797 |
| M177T135_2 | 177. 0750505 | 134. 574 | 7510298. 397 |
| M177T359   | 177. 0735814 | 359. 32  | 8569720. 444 |
| M177T107   | 177. 0749289 | 106. 513 | 8399409. 084 |
| M177T764   | 177. 0902024 | 763. 856 | 30106875. 36 |
| M177T833   | 177. 0907984 | 833. 029 | 44217500. 56 |
| M177T673   | 177. 0892345 | 672. 956 | 16034485. 29 |
| M177T777   | 177. 0902869 | 777. 245 | 725278934. 5 |
| M177T601   | 177. 0909732 | 601. 04  | 187535406. 9 |
| M177T753   | 177. 090159  | 752. 541 | 31793145. 34 |
| M177T715   | 177. 0904716 | 715. 011 | 14532550. 32 |
| M177T694   | 177. 0892965 | 693. 81  | 12632405. 35 |
| M177T802   | 177. 0909105 | 801. 685 | 15924118. 77 |
| M177T103   | 177. 0945468 | 103. 423 | 4412459. 354 |
| M177T334   | 177. 1018158 | 333. 715 | 12432365. 71 |
| M177T427   | 177. 1019434 | 427. 362 | 4495748. 732 |
| M177T91    | 177. 1055064 | 90. 7088 | 539775382    |
| M177T623   | 177. 1268445 | 623. 11  | 8089187. 797 |
| M177T506   | 177. 1267339 | 505. 855 | 1698473. 507 |
| M177T816   | 177. 1267737 | 815. 517 | 10951631. 97 |
| M177T706   | 177. 1267584 | 706. 229 | 6754869. 266 |
| M177T415   | 177. 1382394 | 414. 82  | 1097168. 271 |

|            |              |          |              |
|------------|--------------|----------|--------------|
| M177T563   | 177. 1631612 | 563. 297 | 42684321. 69 |
| M177T649   | 177. 1631537 | 649. 338 | 10873333. 39 |
| M177T703   | 177. 1630655 | 703. 35  | 10988352. 51 |
| M178T393_1 | 177. 5687588 | 392. 715 | 225386240. 7 |
| M178T38    | 177. 9759874 | 38. 3208 | 1235486. 863 |
| M178T323   | 178. 0494992 | 322. 536 | 3180156. 814 |
| M178T171   | 178. 0523882 | 170. 665 | 4004403. 91  |
| M178T261   | 178. 0518038 | 261. 177 | 621102. 4552 |
| M178T89    | 178. 0533178 | 88. 6838 | 30066726. 83 |
| M178T639   | 178. 0714619 | 639. 219 | 2762583. 165 |
| M178T393_2 | 178. 0717808 | 392. 715 | 33197322. 73 |
| M178T143   | 178. 0703232 | 142. 85  | 15486495. 63 |
| M178T95    | 178. 0703342 | 94. 7467 | 355188215. 5 |
| M178T351   | 178. 0866622 | 351. 348 | 16293020. 23 |
| M178T328   | 178. 0867014 | 328. 106 | 149407262. 6 |
| M178T496   | 178. 0849855 | 495. 779 | 11735580. 45 |
| M178T451   | 178. 0866897 | 450. 503 | 28927982. 08 |
| M178T381   | 178. 085973  | 380. 63  | 8940717. 959 |
| M178T527   | 178. 0849326 | 526. 676 | 11934623. 13 |
| M178T298   | 178. 0857514 | 298. 135 | 10910206. 54 |
| M178T308   | 178. 0970923 | 307. 735 | 7308324. 714 |
| M178T613   | 178. 0935081 | 612. 699 | 2976720. 218 |
| M178T777   | 178. 0942646 | 777. 245 | 87189985. 71 |
| M178T601   | 178. 0936891 | 601. 04  | 20584078. 13 |
| M178T92    | 178. 1048814 | 91. 7174 | 50587020. 95 |
| M178T106   | 178. 1066566 | 105. 503 | 69640076. 5  |
| M178T49    | 178. 1219234 | 48. 7362 | 377183. 8423 |
| M179T176   | 178. 5413881 | 175. 952 | 28938519. 08 |
| M179T201   | 178. 6052112 | 200. 766 | 4266702. 582 |
| M179T194   | 178. 6051254 | 193. 823 | 1942748. 921 |
| M179T111   | 178. 6051383 | 111. 382 | 4431331. 645 |
| M179T36_1  | 178. 9901054 | 35. 8675 | 20116761. 46 |
| M179T830   | 178. 9900375 | 830. 193 | 21395906. 52 |
| M179T775   | 178. 9900428 | 774. 919 | 67444072. 48 |
| M179T66    | 178. 9901089 | 65. 7101 | 16267293. 07 |
| M179T814   | 178. 9911678 | 814. 095 | 21436486. 54 |
| M179T798   | 178. 9909822 | 797. 773 | 22058007. 72 |
| M179T36_2  | 179. 0024588 | 35. 8675 | 3413464. 86  |
| M179T794   | 179. 0138688 | 793. 649 | 5985125. 516 |
| M179T783   | 179. 0141542 | 782. 558 | 7234991. 351 |
| M179T420   | 179. 033446  | 420. 274 | 2883918. 033 |
| M179T197   | 179. 0332157 | 196. 644 | 1138821. 743 |
| M179T463   | 179. 0333924 | 463. 271 | 11257954. 55 |
| M179T241_1 | 179. 0489195 | 241. 368 | 918680. 8951 |
| M179T122   | 179. 0545031 | 122. 007 | 31075063. 2  |
| M179T106   | 179. 0544509 | 105. 503 | 21928810. 91 |
| M179T93    | 179. 0544476 | 92. 7272 | 29996922. 32 |
| M179T549   | 179. 0632143 | 549. 375 | 3262539. 65  |
| M179T582   | 179. 070091  | 581. 625 | 14082936. 88 |
| M179T743   | 179. 0697101 | 742. 68  | 11650802. 88 |
| M179T708   | 179. 0709175 | 707. 557 | 29988602. 03 |
| M179T682_1 | 179. 0710529 | 681. 885 | 9346746. 711 |
| M179T833   | 179. 0718612 | 833. 029 | 12332427. 69 |
| M179T594   | 179. 0701624 | 593. 62  | 29119893. 96 |

|            |              |          |              |
|------------|--------------|----------|--------------|
| M179T673   | 179. 0710524 | 672. 956 | 10331612. 9  |
| M179T613   | 179. 0701705 | 612. 699 | 16944957. 72 |
| M179T485   | 179. 0706415 | 485. 471 | 20140791. 88 |
| M179T718   | 179. 0697739 | 717. 959 | 7407354. 111 |
| M179T777   | 179. 0697545 | 777. 245 | 270546378. 2 |
| M179T731   | 179. 0697052 | 731. 347 | 12147111. 05 |
| M179T695   | 179. 0696571 | 695. 155 | 10373177. 82 |
| M179T756   | 179. 0697671 | 755. 537 | 4705124. 6   |
| M179T396   | 179. 0698239 | 396. 415 | 5098345. 615 |
| M179T659   | 179. 0697362 | 658. 953 | 10870409. 43 |
| M179T94    | 179. 0736627 | 93. 7378 | 15408511. 6  |
| M179T241_2 | 179. 0806063 | 241. 368 | 2560142. 472 |
| M179T475   | 179. 0812288 | 475. 007 | 3580443. 545 |
| M179T233   | 179. 0806297 | 233. 081 | 3283138. 293 |
| M179T284   | 179. 0808419 | 284. 377 | 3839654. 175 |
| M179T386   | 179. 0810614 | 386. 352 | 7704211. 535 |
| M179T328   | 179. 0890799 | 328. 106 | 16206653. 25 |
| M179T382   | 179. 1062381 | 382. 125 | 999442. 1301 |
| M179T803   | 179. 1061759 | 802. 88  | 7120581. 301 |
| M179T761   | 179. 1059456 | 760. 916 | 4771748. 56  |
| M179T635   | 179. 1059799 | 635. 022 | 3721416. 695 |
| M179T522   | 179. 1174725 | 522. 177 | 5992393. 143 |
| M179T190   | 179. 1171354 | 189. 571 | 2870271. 429 |
| M179T108   | 179. 1172611 | 107. 537 | 10363280. 91 |
| M179T297   | 179. 1173173 | 296. 739 | 6410071. 806 |
| M179T316   | 179. 1173079 | 315. 701 | 16367020. 9  |
| M179T359   | 179. 1170656 | 359. 32  | 8620623. 166 |
| M179T324   | 179. 116977  | 323. 984 | 28720236. 48 |
| M179T339   | 179. 1280516 | 339. 085 | 5802125. 443 |
| M179T669   | 179. 1439893 | 668. 867 | 9120381. 276 |
| M179T682_2 | 179. 1425484 | 681. 885 | 5632590. 053 |
| M179T562   | 179. 142466  | 561. 955 | 84989082. 52 |
| M179T816   | 179. 1424495 | 815. 517 | 13323715. 34 |
| M179T703   | 179. 1425316 | 703. 35  | 14781273. 21 |
| M179T694   | 179. 1425556 | 693. 81  | 10686036. 37 |
| M180T423   | 179. 5131631 | 423. 199 | 1600847. 919 |
| M180T61    | 180. 0332825 | 61. 1538 | 11596066. 45 |
| M180T463   | 180. 0352628 | 463. 271 | 815690. 0229 |
| M180T44    | 180. 0333227 | 44. 1485 | 8296111. 866 |
| M180T36    | 180. 0435662 | 35. 8675 | 12166022. 47 |
| M180T663   | 180. 0433461 | 663. 287 | 35960126. 35 |
| M180T541   | 180. 0439363 | 541. 275 | 19448924. 34 |
| M180T644   | 180. 0433407 | 643. 727 | 37100624. 6  |
| M180T711   | 180. 0433161 | 710. 534 | 50785684. 16 |
| M180T698   | 180. 0433947 | 697. 952 | 30273164. 18 |
| M180T551   | 180. 0438708 | 550. 919 | 26457176. 97 |
| M180T655   | 180. 0434485 | 654. 542 | 23864249. 57 |
| M180T435   | 180. 0653326 | 434. 589 | 163255947. 6 |
| M180T95    | 180. 0663016 | 94. 7467 | 26370846. 05 |
| M180T278   | 180. 0652548 | 277. 699 | 57190342. 7  |
| M180T237_1 | 180. 0653433 | 237. 171 | 46943025. 42 |
| M180T86    | 180. 0851658 | 85. 6453 | 528454225    |
| M180T164   | 180. 0858369 | 163. 846 | 12881842. 38 |
| M180T158   | 180. 0859894 | 157. 773 | 16871846. 6  |



|          |             |         |             |
|----------|-------------|---------|-------------|
| M180T102 | 180.0852846 | 102.247 | 96357370.84 |
| M180T241 | 180.0860084 | 241.368 | 19133022.86 |
| M180T207 | 180.085993  | 207.393 | 10500898.47 |
| M180T264 | 180.0872169 | 264.079 | 11700892.93 |
| M180T291 | 180.0858144 | 291.307 | 14891293.06 |
| M180T143 | 180.0870174 | 142.85  | 33348347.16 |
| M180T94  | 180.0852958 | 93.7378 | 201875792.2 |
| M180T123 | 180.0870332 | 123.262 | 38449452.26 |
| M180T188 | 180.0857888 | 188.126 | 15987127.32 |
| M180T178 | 180.085763  | 178.408 | 13623966.78 |
| M180T317 | 180.0874303 | 317.199 | 8028773.419 |
| M180T309 | 180.1023166 | 308.967 | 14388216.62 |
| M180T645 | 180.1005935 | 645.278 | 14387867.27 |
| M180T791 | 180.1023161 | 790.802 | 15479969.13 |
| M180T725 | 180.1023741 | 725.212 | 13988427.72 |
| M180T518 | 180.1004014 | 517.762 | 6395645.101 |
| M180T353 | 180.1025349 | 352.65  | 9965072.852 |
| M180T409 | 180.1024607 | 409.271 | 9924350.669 |
| M180T230 | 180.1003756 | 230.321 | 16637571.5  |
| M180T497 | 180.1023075 | 497.214 | 9219089.66  |
| M180T750 | 180.1003751 | 749.96  | 11063824.76 |
| M180T558 | 180.1023933 | 557.967 | 53877776.1  |
| M180T293 | 180.1005105 | 292.623 | 32605640.01 |
| M180T430 | 180.1019316 | 430.131 | 11920613.11 |
| M180T813 | 180.1024295 | 812.862 | 8692957.854 |
| M180T419 | 180.1004562 | 418.97  | 5894260.454 |
| M180T252 | 180.100491  | 251.555 | 13460127.01 |
| M180T688 | 180.1024046 | 687.95  | 23901708.71 |
| M180T267 | 180.100396  | 267.171 | 5783084.44  |
| M180T345 | 180.1023691 | 344.555 | 14218240.94 |
| M180T393 | 180.1021628 | 392.715 | 18408300.26 |
| M180T452 | 180.102458  | 451.804 | 10860449.56 |
| M180T544 | 180.1023367 | 544.056 | 472421125.2 |
| M180T670 | 180.1004166 | 670.166 | 21782524.98 |
| M180T576 | 180.1024298 | 575.878 | 16880765.25 |
| M180T323 | 180.1025333 | 322.536 | 121646305.8 |
| M180T620 | 180.1024365 | 620.172 | 27279253.44 |
| M180T838 | 180.100393  | 837.524 | 5236630.679 |
| M180T706 | 180.1022943 | 706.229 | 23641585.46 |
| M180T374 | 180.1003643 | 373.532 | 7331696.991 |
| M180T736 | 180.1004493 | 735.7   | 10018738.86 |
| M180T275 | 180.1004284 | 274.968 | 11781392.17 |
| M180T653 | 180.1004537 | 653.147 | 15103352.18 |
| M180T509 | 180.100366  | 508.883 | 4589331.22  |
| M180T601 | 180.1024527 | 601.04  | 45863154.51 |
| M180T471 | 180.102397  | 470.602 | 10065668.55 |
| M180T583 | 180.1023493 | 583.068 | 26550124.85 |
| M180T487 | 180.100374  | 486.885 | 6172430.439 |
| M180T527 | 180.1025449 | 526.676 | 21998258.43 |
| M180T443 | 180.1003804 | 443.256 | 7216318.291 |
| M180T216 | 180.1011686 | 216.359 | 276042913.1 |
| M180T364 | 180.1023946 | 363.58  | 10220406.3  |
| M180T773 | 180.1003673 | 773.437 | 11084278.47 |
| M180T823 | 180.1003474 | 822.881 | 7877547.027 |

|            |              |          |              |
|------------|--------------|----------|--------------|
| M180T567   | 180. 1023741 | 567. 1   | 26688516. 06 |
| M180T761   | 180. 1008729 | 760. 916 | 12451387. 19 |
| M180T635   | 180. 10045   | 635. 022 | 15619009. 45 |
| M180T279   | 180. 12328   | 279. 039 | 8353845. 962 |
| M180T237_2 | 180. 1232537 | 237. 171 | 9622144. 245 |
| M180T513   | 180. 1378711 | 513. 285 | 2085250. 602 |
| M180T534   | 180. 1482203 | 533. 958 | 36296402. 38 |
| M180T562   | 180. 1455627 | 561. 955 | 5413414. 315 |
| M180T580   | 180. 1588442 | 580. 22  | 740108. 958  |
| M181T205   | 180. 5388441 | 204. 747 | 4053867. 825 |
| M181T33    | 180. 9892441 | 33. 467  | 21170651. 27 |
| M181T43    | 180. 9906625 | 43. 0471 | 20750228. 78 |
| M181T69    | 180. 989279  | 69. 2834 | 15130945. 13 |
| M181T151   | 180. 9892823 | 151. 016 | 5518078. 797 |
| M181T36    | 181. 0079774 | 35. 8675 | 5109158. 175 |
| M181T788   | 181. 0135039 | 787. 856 | 50976152. 8  |
| M181T739   | 181. 013762  | 738. 697 | 31427393. 11 |
| M181T765   | 181. 0137345 | 765. 406 | 49720654. 13 |
| M181T777   | 181. 0134801 | 777. 245 | 72919764. 86 |
| M181T753   | 181. 0135116 | 752. 541 | 62619739. 03 |
| M181T730   | 181. 0137112 | 729. 798 | 25477999. 8  |
| M181T804   | 181. 0153162 | 804. 327 | 183088376. 4 |
| M181T455   | 181. 02833   | 454. 739 | 2171533. 118 |
| M181T37_1  | 181. 0322598 | 37. 1891 | 2832032. 966 |
| M181T274   | 181. 0322511 | 273. 531 | 2354929. 91  |
| M181T54    | 181. 0323248 | 53. 6731 | 4918013. 245 |
| M181T67    | 181. 0322968 | 66. 9841 | 6223662. 581 |
| M181T45    | 181. 0322771 | 45. 3435 | 4801175. 381 |
| M181T408   | 181. 0386412 | 407. 724 | 787763. 2071 |
| M181T118   | 181. 0490065 | 118. 116 | 8985872. 768 |
| M181T124   | 181. 0490433 | 124. 487 | 5192493. 976 |
| M181T518   | 181. 0490449 | 517. 762 | 10514544. 77 |
| M181T159   | 181. 0489508 | 159. 017 | 19563951. 63 |
| M181T293   | 181. 0478002 | 292. 623 | 27192497. 34 |
| M181T180   | 181. 0489219 | 179. 75  | 10896475. 16 |
| M181T106   | 181. 0496225 | 105. 503 | 64029951. 6  |
| M181T388   | 181. 0490306 | 387. 763 | 6977548. 081 |
| M181T503   | 181. 0490561 | 503. 046 | 6842818. 59  |
| M181T418   | 181. 0490079 | 417. 676 | 5951424. 473 |
| M181T143   | 181. 0488873 | 142. 85  | 16063354. 7  |
| M181T651   | 181. 0485622 | 650. 898 | 1933575. 213 |
| M181T171   | 181. 0489737 | 170. 665 | 6039577. 782 |
| M181T448   | 181. 0489858 | 447. 531 | 4770905. 055 |
| M181T241   | 181. 0600323 | 241. 368 | 9292372. 717 |
| M181T435   | 181. 0686044 | 434. 589 | 14389456. 46 |
| M181T278   | 181. 0685272 | 277. 699 | 3568199. 216 |
| M181T385   | 181. 0714289 | 385. 081 | 594450. 2689 |
| M181T456_1 | 181. 0856121 | 456. 126 | 20226575. 3  |
| M181T37_2  | 181. 085408  | 37. 1891 | 2030140. 143 |
| M181T375   | 181. 085506  | 375. 021 | 7422353. 332 |
| M181T86    | 181. 0893848 | 85. 6453 | 34426761. 06 |
| M181T481   | 181. 0854838 | 481. 042 | 7397795. 198 |
| M181T648   | 181. 0852842 | 648. 026 | 8241826. 118 |
| M181T516   | 181. 0854376 | 516. 214 | 8004737. 756 |

|            |             |         |             |
|------------|-------------|---------|-------------|
| M181T531   | 181.0855181 | 531.127 | 12372200.62 |
| M181T68    | 181.0854551 | 68.0903 | 1702185.144 |
| M181T95    | 181.0894311 | 94.7467 | 9994209.936 |
| M181T44    | 181.0855029 | 44.1485 | 3898837.557 |
| M181T588   | 181.0855711 | 587.521 | 8393356.573 |
| M181T56    | 181.08548   | 56.1096 | 3773288.634 |
| M181T462   | 181.0966273 | 461.845 | 20641772.27 |
| M181T331   | 181.0966917 | 330.809 | 40083682.98 |
| M181T362   | 181.0966262 | 362.146 | 5386692.855 |
| M181T299   | 181.0966955 | 299.493 | 5353543.427 |
| M181T396   | 181.0959295 | 396.415 | 29710665.41 |
| M181T519   | 181.0969403 | 519.257 | 3267287.886 |
| M181T688   | 181.1045259 | 687.95  | 2438312.61  |
| M181T544   | 181.1044961 | 544.056 | 48060879.01 |
| M181T601   | 181.1045514 | 601.04  | 3501963.359 |
| M181T567   | 181.1004206 | 567.1   | 6040947.886 |
| M181T203   | 181.1061261 | 203.36  | 48407582.89 |
| M181T216   | 181.1060783 | 216.359 | 24094693.06 |
| M181T191   | 181.1073645 | 190.962 | 27754400.7  |
| M181T791   | 181.1215258 | 790.802 | 27384021.33 |
| M181T604   | 181.1217768 | 603.95  | 7148561.564 |
| M181T751   | 181.1215515 | 751.333 | 14431460.42 |
| M181T568   | 181.1217561 | 568.464 | 3762329.445 |
| M181T51    | 181.1218249 | 51.1942 | 15401951.76 |
| M181T761   | 181.1215665 | 760.916 | 13752852.07 |
| M181T323   | 181.1328809 | 322.536 | 4996794.069 |
| M181T302   | 181.1328868 | 302.191 | 5802486.762 |
| M181T357   | 181.1328774 | 356.74  | 9753382.972 |
| M181T443   | 181.1331116 | 443.256 | 5595206.849 |
| M181T456_2 | 181.1444392 | 456.126 | 1376245.526 |
| M181T354   | 181.1435216 | 353.978 | 32238420.17 |
| M181T534   | 181.1523546 | 533.958 | 3319064.519 |
| M181T811   | 181.1582577 | 811.413 | 2810759.309 |
| M182T202   | 181.5117085 | 202.149 | 1404230.281 |
| M182T440   | 181.5305517 | 440.459 | 1728475.01  |
| M182T371   | 181.5361755 | 370.777 | 2376426.059 |
| M182T80    | 181.5991242 | 79.643  | 1433277.556 |
| M182T65    | 181.9502309 | 64.6213 | 7277601.97  |
| M182T768   | 181.9783774 | 768.166 | 270482728.2 |
| M182T762   | 181.9888359 | 762.439 | 16288820.44 |
| M182T61    | 181.9869334 | 61.1538 | 8687702.516 |
| M182T33    | 181.9868595 | 33.467  | 46657927.44 |
| M182T785   | 181.9888148 | 785.136 | 19834745.14 |
| M182T750   | 181.9888606 | 749.96  | 15074363.3  |
| M182T708   | 181.9877736 | 707.557 | 7101828.575 |
| M182T804   | 181.9887311 | 804.327 | 8340797.525 |
| M182T834   | 181.9887047 | 834.486 | 2763158.232 |
| M182T75    | 181.986925  | 74.9588 | 48423083.86 |
| M182T694   | 181.9877354 | 693.81  | 10748372.79 |
| M182T826   | 181.9886951 | 825.74  | 4095553.907 |
| M182T817   | 181.9887036 | 816.953 | 4560179.356 |
| M182T45    | 181.9869169 | 45.3435 | 15156548.07 |
| M182T137   | 181.9918858 | 137.373 | 3558171.713 |
| M182T128   | 181.9918744 | 127.944 | 4581314.736 |

|            |              |          |              |
|------------|--------------|----------|--------------|
| M182T771   | 181. 988873  | 771. 042 | 11000010. 76 |
| M182T218_1 | 181. 9999514 | 217. 866 | 3134606. 328 |
| M182T378_1 | 182. 0113515 | 377. 704 | 2235487. 016 |
| M182T777   | 182. 0185637 | 777. 245 | 4573192. 959 |
| M182T36    | 182. 0285154 | 35. 8675 | 33875342. 21 |
| M182T63    | 182. 0285403 | 63. 4448 | 102125183. 9 |
| M182T636   | 182. 031683  | 636. 473 | 1434405. 835 |
| M182T111   | 182. 0284384 | 111. 382 | 22607600. 33 |
| M182T341   | 182. 0305491 | 340. 548 | 19846465. 72 |
| M182T278_1 | 182. 0303853 | 277. 699 | 89290002. 32 |
| M182T136   | 182. 0314438 | 135. 971 | 23892861. 43 |
| M182T158   | 182. 0441684 | 157. 773 | 3827222. 467 |
| M182T100   | 182. 0442818 | 100. 146 | 4764972. 912 |
| M182T212_1 | 182. 0443507 | 212. 448 | 157539131. 4 |
| M182T324   | 182. 0440323 | 323. 984 | 1925272. 363 |
| M182T176   | 182. 0607478 | 175. 952 | 7006355. 274 |
| M182T177   | 182. 0799894 | 177. 295 | 741084990. 1 |
| M182T218_2 | 182. 0799605 | 217. 866 | 2258159460   |
| M182T327   | 182. 0799461 | 326. 78  | 14928312. 1  |
| M182T163   | 182. 0817084 | 162. 728 | 700434717. 8 |
| M182T253   | 182. 0817766 | 253. 024 | 33579939. 54 |
| M182T549   | 182. 0807089 | 549. 375 | 40668557. 88 |
| M182T423   | 182. 0815076 | 423. 199 | 19576328. 36 |
| M182T198_1 | 182. 0804682 | 198. 072 | 98706676. 93 |
| M182T104   | 182. 0811985 | 104. 493 | 48533388. 78 |
| M182T378_2 | 182. 0933816 | 377. 704 | 1503718180   |
| M182T331   | 182. 0915809 | 330. 809 | 2068242730   |
| M182T85    | 182. 0918639 | 84. 5768 | 10038411. 14 |
| M182T212_2 | 182. 0919016 | 212. 448 | 15062080. 4  |
| M182T347   | 182. 0917409 | 347. 175 | 22334965. 21 |
| M182T396   | 182. 1000516 | 396. 415 | 2745698. 555 |
| M182T198_2 | 182. 0918824 | 198. 072 | 4642478. 177 |
| M182T62    | 182. 1170841 | 62. 1777 | 2598382. 048 |
| M182T68    | 182. 1169619 | 68. 0903 | 1050467. 737 |
| M182T56    | 182. 117039  | 56. 1096 | 2487782. 306 |
| M182T38    | 182. 1170292 | 38. 3208 | 4279415. 306 |
| M182T348   | 182. 1170823 | 348. 488 | 6084755. 841 |
| M182T203   | 182. 111099  | 203. 36  | 3268319. 685 |
| M182T644   | 182. 1171787 | 643. 727 | 6512543. 899 |
| M182T325   | 182. 1168779 | 325. 35  | 4204499. 147 |
| M182T412   | 182. 1171211 | 411. 838 | 7417716. 078 |
| M182T604   | 182. 1171183 | 603. 95  | 4540030. 135 |
| M182T48    | 182. 1170399 | 47. 6391 | 3436984. 794 |
| M182T547   | 182. 1172173 | 546. 651 | 4901933. 446 |
| M182T760   | 182. 116639  | 759. 605 | 5373869. 076 |
| M182T278_2 | 182. 1168924 | 277. 699 | 374509871    |
| M182T589   | 182. 1171573 | 589. 053 | 3296404. 206 |
| M182T308   | 182. 118463  | 307. 735 | 7058579. 405 |
| M182T317   | 182. 1183516 | 317. 199 | 4735449. 249 |
| M182T350   | 182. 1282447 | 349. 911 | 5538942. 202 |
| M182T354   | 182. 1479065 | 353. 978 | 2702517. 87  |
| M182T219   | 182. 1620661 | 219. 233 | 1505000. 429 |
| M182T378_3 | 182. 1719161 | 377. 704 | 2001357. 964 |
| M182T540   | 182. 1896325 | 539. 764 | 2874529. 631 |

|            |              |          |              |
|------------|--------------|----------|--------------|
| M183T216   | 182. 5307592 | 216. 359 | 4541061. 952 |
| M183T438   | 182. 5327989 | 437. 571 | 587410. 6941 |
| M183T751   | 182. 5871397 | 751. 333 | 15640617. 66 |
| M183T378_1 | 182. 5937517 | 377. 704 | 236884791. 8 |
| M183T697   | 182. 5982962 | 696. 575 | 7866362. 388 |
| M183T809   | 182. 9595589 | 808. 678 | 4695677. 096 |
| M183T818   | 182. 9596939 | 818. 418 | 6620833. 342 |
| M183T75    | 182. 9613896 | 74. 9588 | 70131274. 43 |
| M183T832_1 | 182. 9597396 | 831. 709 | 8612180. 646 |
| M183T794   | 182. 9832525 | 793. 649 | 64563540. 06 |
| M183T785   | 182. 9829526 | 785. 136 | 128103261. 4 |
| M183T33    | 182. 9829711 | 33. 467  | 347159022. 6 |
| M183T78    | 182. 9831567 | 78. 3841 | 168943901. 6 |
| M183T807   | 182. 9833189 | 807. 232 | 92298848. 94 |
| M183T838   | 182. 9829155 | 837. 524 | 21405908. 88 |
| M183T87    | 182. 9828788 | 86. 6643 | 26087999. 12 |
| M183T70    | 182. 9828244 | 70. 3428 | 273771189. 5 |
| M183T760   | 182. 9827098 | 759. 605 | 505642309. 1 |
| M183T716   | 182. 9833693 | 716. 403 | 374442689. 2 |
| M183T737_1 | 182. 9832497 | 737. 198 | 421959841. 1 |
| M183T50    | 182. 9830019 | 50. 041  | 568347733. 4 |
| M183T694   | 182. 9832683 | 693. 81  | 213187255. 1 |
| M183T821_1 | 182. 9830065 | 821. 334 | 42872250. 24 |
| M183T122   | 183. 004712  | 122. 007 | 8318179. 708 |
| M183T264   | 183. 0044987 | 264. 079 | 553673. 4309 |
| M183T777   | 183. 0093155 | 777. 245 | 28080799. 45 |
| M183T798   | 183. 0094204 | 797. 773 | 23203044. 94 |
| M183T813   | 183. 0104194 | 812. 862 | 17136886. 06 |
| M183T832_2 | 183. 0103223 | 831. 709 | 13298540. 87 |
| M183T821_2 | 183. 0104379 | 821. 334 | 13361973. 43 |
| M183T116   | 183. 0226166 | 115. 522 | 9680693. 01  |
| M183T124   | 183. 0225934 | 124. 487 | 15839853. 19 |
| M183T440   | 183. 0293664 | 440. 459 | 4102124. 81  |
| M183T55    | 183. 0314003 | 54. 867  | 10913961. 6  |
| M183T386_1 | 183. 0284185 | 386. 352 | 798820. 1338 |
| M183T206   | 183. 0416731 | 205. 903 | 56222090. 67 |
| M183T74    | 183. 0608485 | 73. 8324 | 9903778. 677 |
| M183T541   | 183. 0647738 | 541. 275 | 24312702. 84 |
| M183T106   | 183. 0651776 | 105. 503 | 6892819. 681 |
| M183T594_1 | 183. 0647733 | 593. 62  | 6034461. 466 |
| M183T339   | 183. 0647461 | 339. 085 | 5003602. 305 |
| M183T42    | 183. 0647067 | 41. 798  | 11174151. 75 |
| M183T318   | 183. 0648097 | 318. 497 | 5737881. 437 |
| M183T379_1 | 183. 0645175 | 379. 194 | 10469699. 23 |
| M183T350   | 183. 0760332 | 349. 911 | 8560192. 856 |
| M183T485   | 183. 0766411 | 485. 471 | 3715166. 548 |
| M183T359   | 183. 076028  | 359. 32  | 6660553. 569 |
| M183T610   | 183. 0771847 | 609. 592 | 21107000. 38 |
| M183T164   | 183. 084604  | 163. 846 | 61992459. 22 |
| M183T594_2 | 183. 0772951 | 593. 62  | 1488373. 316 |
| M183T177   | 183. 0844043 | 177. 295 | 69873394. 93 |
| M183T218   | 183. 0850877 | 217. 866 | 203242666. 7 |
| M183T92    | 183. 0848309 | 91. 7174 | 908178346. 1 |
| M183T820   | 183. 0796547 | 819. 78  | 5508975. 519 |

|            |             |         |             |
|------------|-------------|---------|-------------|
| M183T549   | 183.0838449 | 549.375 | 4132174.132 |
| M183T379_2 | 183.0759636 | 379.194 | 5545837.774 |
| M183T103   | 183.0852104 | 103.423 | 114002209.4 |
| M183T487   | 183.0912676 | 486.885 | 41849578.7  |
| M183T378_2 | 183.0954125 | 377.704 | 23348573.08 |
| M183T331   | 183.094804  | 330.809 | 164829061.7 |
| M183T477   | 183.1021883 | 476.554 | 4638326.588 |
| M183T506   | 183.1013968 | 505.855 | 2904210.154 |
| M183T499   | 183.1012392 | 498.645 | 4775368.395 |
| M183T538   | 183.1021586 | 538.316 | 9326460.712 |
| M183T488   | 183.1022361 | 488.437 | 5126653.388 |
| M183T422   | 183.1013338 | 421.784 | 5765342.5   |
| M183T455   | 183.1021655 | 454.739 | 14549433.4  |
| M183T515   | 183.1013438 | 514.727 | 4742749.465 |
| M183T468   | 183.1013074 | 467.706 | 5488191.805 |
| M183T69    | 183.1010376 | 69.2834 | 1684684.718 |
| M183T737_2 | 183.1010969 | 737.198 | 8506121.397 |
| M183T443   | 183.1013538 | 443.256 | 6758050.713 |
| M183T525   | 183.101261  | 525.132 | 4268207.259 |
| M183T439   | 183.1127468 | 439.021 | 5396293.798 |
| M183T351   | 183.1124837 | 351.348 | 11662602.81 |
| M183T369   | 183.1124767 | 369.321 | 8573762.297 |
| M183T415   | 183.1127824 | 414.82  | 7758574.349 |
| M183T104   | 183.1123908 | 104.493 | 32954995.41 |
| M183T386_2 | 183.1124241 | 386.352 | 26128842.38 |
| M183T278   | 183.1202617 | 277.699 | 38032177.11 |
| M183T290   | 183.1226962 | 289.912 | 6582483.051 |
| M183T622   | 183.1374764 | 621.708 | 5308760.43  |
| M183T653   | 183.1374037 | 653.147 | 3742996.749 |
| M183T65    | 183.137567  | 64.6213 | 2593557.065 |
| M183T713   | 183.1375108 | 713.464 | 3629063.793 |
| M183T132   | 183.1376999 | 131.949 | 1557593.115 |
| M184T206_1 | 183.5431374 | 205.903 | 5342301.624 |
| M184T74    | 183.961629  | 73.8324 | 10133010.92 |
| M184T788   | 183.9880477 | 787.856 | 6835770.779 |
| M184T33    | 183.9882717 | 33.467  | 18868566.88 |
| M184T756   | 183.9881565 | 755.537 | 8271648.837 |
| M184T131   | 183.9913621 | 130.668 | 7615568.808 |
| M184T70    | 183.9882381 | 70.3428 | 11714820.14 |
| M184T722   | 183.9881442 | 722.193 | 11985169.47 |
| M184T61    | 184.0022048 | 61.1538 | 25919208.53 |
| M184T36    | 184.0022172 | 35.8675 | 55962886.62 |
| M184T68_1  | 184.0022443 | 68.0903 | 10179070.06 |
| M184T639   | 184.0027851 | 639.219 | 24414254.86 |
| M184T570   | 184.0012381 | 570.01  | 9636068.976 |
| M184T713   | 184.0022532 | 713.464 | 20741347.69 |
| M184T59    | 184.0252936 | 58.6151 | 2203869.426 |
| M184T37_1  | 184.0267988 | 37.1891 | 2293488.011 |
| M184T52    | 184.0254036 | 52.4521 | 3398056.163 |
| M184T163   | 184.0234058 | 162.728 | 3689700.087 |
| M184T68_2  | 184.0253106 | 68.0903 | 2436135.475 |
| M184T150   | 184.0236475 | 149.65  | 2868125.793 |
| M184T44    | 184.0253284 | 44.1485 | 2960417.815 |
| M184T122   | 184.0305364 | 122.007 | 5125989.72  |

|            |              |          |              |
|------------|--------------|----------|--------------|
| M184T114   | 184. 0305948 | 114. 15  | 3977464. 003 |
| M184T308   | 184. 0599706 | 307. 735 | 7700737. 435 |
| M184T144   | 184. 0597523 | 143. 959 | 12042917. 65 |
| M184T293   | 184. 0593413 | 292. 623 | 12105476. 14 |
| M184T129   | 184. 0599202 | 129. 234 | 14432400. 22 |
| M184T418   | 184. 0600984 | 417. 676 | 4801813. 135 |
| M184T374   | 184. 0598874 | 373. 532 | 12718372. 78 |
| M184T403   | 184. 0601503 | 403. 447 | 5420526. 499 |
| M184T104   | 184. 0599064 | 104. 493 | 71094913. 16 |
| M184T206_2 | 184. 0611674 | 205. 903 | 58118141. 99 |
| M184T94    | 184. 0621265 | 93. 7378 | 75900367. 4  |
| M184T88    | 184. 0726089 | 87. 6739 | 127680280. 9 |
| M184T32    | 184. 073028  | 32. 4171 | 2230300. 658 |
| M184T823   | 184. 0728954 | 822. 881 | 19667155. 71 |
| M184T218   | 184. 0857207 | 217. 866 | 9318399. 043 |
| M184T92    | 184. 0891517 | 91. 7174 | 57446744. 9  |
| M184T475   | 184. 0966176 | 475. 007 | 21038028. 43 |
| M184T106   | 184. 0963565 | 105. 503 | 14199974. 84 |
| M184T488   | 184. 0956603 | 488. 437 | 12123215. 64 |
| M184T465   | 184. 0975714 | 464. 668 | 19529945. 6  |
| M184T331   | 184. 0972317 | 330. 809 | 11702358. 74 |
| M184T299   | 184. 0963103 | 299. 493 | 23947276. 14 |
| M184T198   | 184. 0965002 | 198. 072 | 14607903. 69 |
| M184T376   | 184. 0963967 | 376. 409 | 12221964. 81 |
| M184T439   | 184. 097818  | 439. 021 | 44832116. 45 |
| M184T219   | 184. 0961355 | 219. 233 | 9174509. 755 |
| M184T272   | 184. 1075541 | 272. 304 | 43955302. 62 |
| M184T252   | 184. 1075526 | 251. 555 | 54339516. 4  |
| M184T165   | 184. 1072272 | 165. 217 | 147627610. 5 |
| M184T260   | 184. 1072641 | 259. 74  | 58753338. 16 |
| M184T197   | 184. 1072479 | 196. 644 | 48811870. 95 |
| M184T176   | 184. 1072443 | 175. 952 | 403733822. 9 |
| M184T317   | 184. 1090893 | 317. 199 | 17680258. 76 |
| M184T305   | 184. 1073231 | 304. 777 | 16733487. 63 |
| M184T385   | 184. 1156915 | 385. 081 | 1985048. 108 |
| M184T605   | 184. 1324702 | 605. 264 | 2584458. 432 |
| M184T39    | 184. 1327463 | 39. 4128 | 2492653. 58  |
| M184T110   | 184. 1327824 | 110. 047 | 6416740. 823 |
| M184T173   | 184. 1325423 | 173. 407 | 6050249. 593 |
| M184T549   | 184. 132459  | 549. 375 | 4449470. 446 |
| M184T588   | 184. 1327608 | 587. 521 | 2730677. 922 |
| M184T456   | 184. 1442963 | 456. 126 | 29239204. 14 |
| M184T466   | 184. 1438091 | 466. 162 | 5982866. 526 |
| M184T37_2  | 184. 4848026 | 37. 1891 | 7848544. 073 |
| M185T345   | 184. 5357955 | 344. 555 | 7895950. 363 |
| M185T338   | 184. 5358474 | 337. 767 | 6229942. 296 |
| M185T321   | 184. 5359545 | 321. 198 | 10437199. 73 |
| M185T365   | 184. 5355596 | 365. 061 | 9357169. 715 |
| M185T233   | 184. 5597057 | 233. 081 | 14104190. 8  |
| M185T302   | 184. 5595401 | 302. 191 | 3414498. 815 |
| M185T313   | 184. 5996386 | 312. 85  | 3640438. 052 |
| M185T308   | 184. 6235596 | 307. 735 | 2442339. 316 |
| M185T74    | 184. 9601126 | 73. 8324 | 10275257. 74 |
| M185T43_1  | 184. 9603792 | 43. 0471 | 13311005. 69 |

|            |              |          |              |
|------------|--------------|----------|--------------|
| M185T61    | 184. 984244  | 61. 1538 | 27249140. 4  |
| M185T794   | 184. 9848685 | 793. 649 | 376988638. 1 |
| M185T748   | 184. 984341  | 748. 486 | 60033293. 46 |
| M185T77    | 184. 984214  | 77. 2391 | 23688015. 06 |
| M185T739   | 184. 9876303 | 738. 697 | 57462269. 75 |
| M185T765   | 184. 984341  | 765. 406 | 90008893. 86 |
| M185T69    | 184. 9841511 | 69. 2834 | 30779491. 19 |
| M185T32    | 184. 9839666 | 32. 4171 | 71317369. 97 |
| M185T54    | 184. 9842031 | 53. 6731 | 30068721. 4  |
| M185T45    | 184. 9840656 | 45. 3435 | 49168354. 61 |
| M185T36    | 185. 0058253 | 35. 8675 | 1670629. 042 |
| M185T260   | 185. 0075976 | 259. 74  | 223568659. 8 |
| M185T709   | 185. 0226362 | 709. 106 | 5253640. 069 |
| M185T75    | 185. 0223207 | 74. 9588 | 24241555. 96 |
| M185T41    | 185. 0228037 | 40. 6031 | 36489517. 71 |
| M185T171   | 185. 0218233 | 170. 665 | 3109874. 134 |
| M185T757   | 185. 0226475 | 757. 001 | 6328266. 536 |
| M185T82    | 185. 0414324 | 82. 0569 | 3366225. 064 |
| M185T264   | 185. 0414158 | 264. 079 | 11521310. 99 |
| M185T792   | 185. 0773203 | 792. 146 | 1616729. 843 |
| M185T474   | 185. 0807024 | 473. 597 | 8326768. 082 |
| M185T499   | 185. 0809289 | 498. 645 | 5897637. 117 |
| M185T68    | 185. 0802416 | 68. 0903 | 1936809. 781 |
| M185T43_2  | 185. 0803271 | 43. 0471 | 3070099. 903 |
| M185T438   | 185. 0809931 | 437. 571 | 18435237. 51 |
| M185T52    | 185. 0803643 | 52. 4521 | 3689234. 654 |
| M185T185   | 185. 0914811 | 185. 398 | 36619447. 45 |
| M185T250_1 | 185. 0920054 | 250. 144 | 216190019. 8 |
| M185T336   | 185. 0927155 | 336. 344 | 11487011. 92 |
| M185T279   | 185. 0926916 | 279. 039 | 128237767. 9 |
| M185T92    | 185. 0905065 | 91. 7174 | 12040782. 19 |
| M185T198   | 185. 0994018 | 198. 072 | 854152. 3707 |
| M185T488   | 185. 1064764 | 488. 437 | 16853457. 33 |
| M185T372   | 185. 1167846 | 372. 152 | 3900921. 042 |
| M185T456   | 185. 1172106 | 456. 126 | 8330800. 752 |
| M185T582   | 185. 1151539 | 581. 625 | 8515333. 912 |
| M185T750   | 185. 1167189 | 749. 96  | 3753237. 266 |
| M185T419   | 185. 1172815 | 418. 97  | 11229481. 15 |
| M185T165   | 185. 1107844 | 165. 217 | 10980891. 63 |
| M185T250_2 | 185. 1108142 | 250. 144 | 3682775. 034 |
| M185T533   | 185. 1166019 | 532. 526 | 9488731. 925 |
| M185T509   | 185. 117163  | 508. 883 | 9515153. 192 |
| M185T176   | 185. 1108732 | 175. 952 | 30828212. 17 |
| M185T635   | 185. 1168776 | 635. 022 | 8037458. 909 |
| M185T817   | 185. 1167992 | 816. 953 | 4426245. 113 |
| M185T462   | 185. 1280683 | 461. 845 | 19613438. 15 |
| M185T449   | 185. 1277606 | 448. 978 | 15725410. 16 |
| M185T341   | 185. 1278139 | 340. 548 | 2318924. 939 |
| M185T318   | 185. 1279801 | 318. 497 | 7882837. 792 |
| M185T283   | 185. 1389447 | 282. 886 | 21669840. 47 |
| M185T86    | 185. 1389901 | 85. 6453 | 8047763. 167 |
| M185T123   | 185. 1389134 | 123. 262 | 14342417. 58 |
| M185T692   | 185. 1532188 | 692. 461 | 5462634. 203 |
| M186T393   | 185. 5542395 | 392. 715 | 31197051. 86 |



|            |              |          |              |
|------------|--------------|----------|--------------|
| M186T188   | 185. 6075068 | 188. 126 | 6531825. 661 |
| M186T32    | 185. 9833161 | 32. 4171 | 3331244. 602 |
| M186T286   | 186. 0107382 | 285. 9   | 1361521. 401 |
| M186T131   | 186. 0241827 | 130. 668 | 806512. 0956 |
| M186T443   | 186. 0377455 | 443. 256 | 3438848. 74  |
| M186T171   | 186. 0410654 | 170. 665 | 26373894. 76 |
| M186T261   | 186. 0411283 | 261. 177 | 6810578. 877 |
| M186T642   | 186. 0543322 | 642. 211 | 4082494. 742 |
| M186T394   | 186. 0577254 | 393. 934 | 3774813. 156 |
| M186T164   | 186. 0750254 | 163. 846 | 73915913. 73 |
| M186T649   | 186. 0767276 | 649. 338 | 25552156. 05 |
| M186T103   | 186. 0768569 | 103. 423 | 209582918. 2 |
| M186T143_1 | 186. 0752972 | 142. 85  | 35571798. 13 |
| M186T295   | 186. 0745122 | 295. 356 | 116562033    |
| M186T91    | 186. 0768602 | 90. 7088 | 154920886. 6 |
| M186T396   | 186. 0746317 | 396. 415 | 16161591. 29 |
| M186T250   | 186. 0959157 | 250. 144 | 15892701. 48 |
| M186T279   | 186. 094682  | 279. 039 | 6846115. 273 |
| M186T518   | 186. 1137756 | 517. 762 | 9484610. 813 |
| M186T143_2 | 186. 1119302 | 142. 85  | 36232387. 02 |
| M186T41    | 186. 1117066 | 40. 6031 | 8460916. 042 |
| M186T62    | 186. 1118157 | 62. 1777 | 9552437. 851 |
| M186T156   | 186. 1118524 | 156. 393 | 26377940. 22 |
| M186T107   | 186. 11298   | 106. 513 | 81623671. 92 |
| M186T362   | 186. 1225155 | 362. 146 | 92728209. 77 |
| M186T311   | 186. 1232045 | 311. 445 | 8243745. 801 |
| M186T214   | 186. 1229921 | 213. 872 | 10515392. 51 |
| M186T283   | 186. 1422935 | 282. 886 | 1333437. 069 |
| M186T592   | 186. 1482257 | 592. 067 | 5017299. 507 |
| M186T821   | 186. 1843698 | 821. 334 | 10044692. 68 |
| M187T171   | 186. 542767  | 170. 665 | 3149977. 177 |
| M187T184   | 186. 9555009 | 183. 886 | 10762617. 94 |
| M187T46_1  | 186. 9553863 | 46. 447  | 295909920. 2 |
| M187T139   | 186. 9556731 | 138. 766 | 13862575. 27 |
| M187T279   | 186. 9554151 | 279. 039 | 61450808. 15 |
| M187T299   | 186. 9555423 | 299. 493 | 21174653. 61 |
| M187T155   | 186. 9554315 | 155. 197 | 13888041. 48 |
| M187T829   | 186. 9801769 | 828. 73  | 25477591. 84 |
| M187T806   | 186. 9801541 | 805. 823 | 42879682. 92 |
| M187T32    | 186. 9799633 | 32. 4171 | 26573635. 53 |
| M187T756   | 186. 9811499 | 755. 537 | 154245807. 7 |
| M187T792   | 186. 9814447 | 792. 146 | 27148413. 39 |
| M187T783   | 186. 9813103 | 782. 558 | 31296143. 89 |
| M187T46_2  | 186. 9897565 | 46. 447  | 1511879. 5   |
| M187T69    | 187. 0073924 | 69. 2834 | 4127522. 399 |
| M187T210   | 187. 0078236 | 210. 186 | 6363392. 674 |
| M187T123   | 187. 0207059 | 123. 262 | 7503182. 37  |
| M187T389   | 187. 0232771 | 389. 035 | 4069578. 095 |
| M187T203   | 187. 0490227 | 203. 36  | 1287540. 801 |
| M187T132   | 187. 0489579 | 131. 949 | 612134. 7874 |
| M187T163_1 | 187. 0596444 | 162. 728 | 14620719. 72 |
| M187T288   | 187. 059164  | 288. 481 | 8568147. 41  |
| M187T143   | 187. 0594615 | 142. 85  | 12813604. 34 |
| M187T96    | 187. 0594166 | 95. 7572 | 16557448. 58 |

|            |              |          |              |
|------------|--------------|----------|--------------|
| M187T685   | 187. 0596247 | 684. 985 | 23322822. 7  |
| M187T239   | 187. 0597061 | 238. 605 | 12703784. 32 |
| M187T113   | 187. 0597121 | 112. 781 | 7407309. 902 |
| M187T465   | 187. 0616944 | 464. 668 | 8862950. 966 |
| M187T163_2 | 187. 070877  | 162. 728 | 21336489. 91 |
| M187T147   | 187. 0706952 | 146. 742 | 12363980. 41 |
| M187T99    | 187. 0707066 | 98. 9918 | 20157887. 46 |
| M187T282   | 187. 0704073 | 281. 666 | 2576514. 637 |
| M187T135   | 187. 0709133 | 134. 574 | 9230386. 35  |
| M187T488   | 187. 0752578 | 488. 437 | 1797518. 898 |
| M187T295   | 187. 0786989 | 295. 356 | 8391850. 59  |
| M187T502   | 187. 096145  | 501. 549 | 3850907. 083 |
| M187T164   | 187. 107771  | 163. 846 | 40174291. 23 |
| M187T101   | 187. 1066697 | 101. 161 | 114987391. 2 |
| M187T144   | 187. 1078937 | 143. 959 | 26623229. 25 |
| M187T329   | 187. 1075845 | 329. 481 | 5378177. 535 |
| M187T297   | 187. 1070246 | 296. 739 | 5417576. 065 |
| M187T233   | 187. 1071291 | 233. 081 | 9219190. 298 |
| M187T172   | 187. 1067506 | 171. 935 | 13838873. 78 |
| M187T86    | 187. 1185058 | 85. 6453 | 48975502. 48 |
| M187T31    | 187. 1269555 | 31. 4047 | 4912003. 837 |
| M187T487   | 187. 1233535 | 486. 885 | 27731781. 75 |
| M187T361   | 187. 1246764 | 360. 794 | 11912782. 43 |
| M187T605   | 187. 1463858 | 605. 264 | 7818646. 475 |
| M187T669   | 187. 1489471 | 668. 867 | 44382652. 2  |
| M187T649   | 187. 1474952 | 649. 338 | 14811703. 09 |
| M187T682   | 187. 1476073 | 681. 885 | 30685353. 91 |
| M187T433   | 187. 1436584 | 433. 111 | 3227890. 738 |
| M187T418   | 187. 1439672 | 417. 676 | 2055728. 637 |
| M187T562   | 187. 1477019 | 561. 955 | 286738082. 3 |
| M187T718   | 187. 147565  | 717. 959 | 10916603. 27 |
| M187T426   | 187. 143732  | 425. 909 | 3322173. 996 |
| M187T703   | 187. 1475492 | 703. 35  | 19806908. 46 |
| M187T545   | 187. 147645  | 545. 203 | 61708925. 34 |
| M187T659   | 187. 1475516 | 658. 953 | 8060982. 277 |
| M187T694   | 187. 1489204 | 693. 81  | 35641621. 03 |
| M187T576   | 187. 1463552 | 575. 878 | 10764651. 55 |
| M187T84    | 187. 1544558 | 83. 5661 | 6798190. 849 |
| M187T448   | 187. 1561952 | 447. 531 | 1296281. 187 |
| M188T412   | 187. 5250232 | 411. 838 | 1893967. 098 |
| M188T176   | 187. 5466048 | 175. 952 | 3862748. 513 |
| M188T351   | 187. 5942552 | 351. 348 | 1950032. 664 |
| M188T37    | 187. 9578319 | 37. 1891 | 2015083. 286 |
| M188T43    | 187. 9591903 | 43. 0471 | 2255789. 332 |
| M188T61    | 187. 9592087 | 61. 1538 | 2119138. 366 |
| M188T54    | 187. 9591704 | 53. 6731 | 2421752. 093 |
| M188T70    | 187. 9619599 | 70. 3428 | 2933651. 982 |
| M188T173   | 188. 0544608 | 173. 407 | 98701889. 35 |
| M188T222   | 188. 0562052 | 222. 017 | 62090209. 03 |
| M188T600   | 188. 0695503 | 599. 621 | 21554178. 62 |
| M188T451   | 188. 0700559 | 450. 503 | 10523466. 44 |
| M188T516_1 | 188. 0700727 | 516. 214 | 5943829. 155 |
| M188T401   | 188. 0691364 | 400. 59  | 342641704. 2 |
| M188T438   | 188. 0701086 | 437. 571 | 9171789. 212 |

|            |             |         |             |
|------------|-------------|---------|-------------|
| M188T163   | 188.0921844 | 162.728 | 152331841.4 |
| M188T582   | 188.0914785 | 581.625 | 34625819.14 |
| M188T558   | 188.0919062 | 557.967 | 130435783.6 |
| M188T325_1 | 188.0920515 | 325.35  | 19320498.77 |
| M188T682   | 188.0911971 | 681.885 | 42418475.97 |
| M188T103_1 | 188.0924616 | 103.423 | 150608909   |
| M188T282   | 188.0900834 | 281.666 | 15762568.27 |
| M188T516_2 | 188.0919873 | 516.214 | 18151196.6  |
| M188T350   | 188.0923754 | 349.911 | 11544899.21 |
| M188T777   | 188.0878407 | 777.245 | 3528710.09  |
| M188T90    | 188.0909476 | 89.6999 | 49102746.62 |
| M188T762   | 188.0910107 | 762.439 | 7207232.729 |
| M188T299   | 188.0924278 | 299.493 | 28877327.93 |
| M188T211   | 188.0908973 | 211.288 | 95465427.51 |
| M188T158   | 188.102532  | 157.773 | 5735194.322 |
| M188T308   | 188.1024601 | 307.735 | 17605677.9  |
| M188T230   | 188.1024112 | 230.321 | 54780863.44 |
| M188T123   | 188.1025153 | 123.262 | 7738646.799 |
| M188T113   | 188.1024317 | 112.781 | 7142984.249 |
| M188T145   | 188.1036968 | 145.382 | 23705414.19 |
| M188T199   | 188.1149974 | 199.43  | 5147958.41  |
| M188T309   | 188.1274959 | 308.967 | 28133592.44 |
| M188T325_2 | 188.1275932 | 325.35  | 21530933.36 |
| M188T167   | 188.1274879 | 166.613 | 9259019.575 |
| M188T103_2 | 188.1273776 | 103.423 | 14833281.13 |
| M188T580   | 188.1277208 | 580.22  | 3516329.877 |
| M188T488   | 188.1268849 | 488.437 | 11312465.34 |
| M188T216   | 188.1274016 | 216.359 | 6004241.907 |
| M188T562   | 188.1508731 | 561.955 | 41160379.86 |
| M188T665   | 188.1640341 | 664.745 | 1246882.653 |
| M188T408   | 188.1642386 | 407.724 | 7630058.825 |
| M189T135   | 188.53069   | 134.574 | 9219221.255 |
| M189T239   | 188.5669124 | 238.605 | 1068918.837 |
| M189T60    | 188.9779774 | 59.9075 | 1735941.894 |
| M189T69_1  | 188.977849  | 69.2834 | 887999.8558 |
| M189T32    | 188.9780023 | 32.4171 | 3161436.13  |
| M189T753   | 188.9775391 | 752.541 | 4196095.168 |
| M189T148_1 | 188.9869997 | 148.117 | 9318873.398 |
| M189T69_2  | 188.9969472 | 69.2834 | 796022.7778 |
| M189T62    | 188.99754   | 62.1777 | 1347725.776 |
| M189T52    | 188.9975413 | 52.4521 | 3165444.24  |
| M189T35    | 188.9975246 | 34.5397 | 9889646.578 |
| M189T329   | 189.038794  | 329.481 | 4047271.768 |
| M189T215   | 189.0387721 | 215.068 | 3656325.052 |
| M189T659   | 189.0388692 | 658.953 | 6552780.47  |
| M189T395   | 189.0540809 | 395.264 | 3671070.215 |
| M189T572   | 189.0541192 | 571.523 | 9384477.141 |
| M189T443   | 189.0542289 | 443.256 | 1745151.455 |
| M189T600   | 189.0771226 | 599.621 | 58745010.32 |
| M189T616   | 189.0773076 | 615.594 | 31410552.82 |
| M189T623   | 189.0751619 | 623.11  | 31266997.59 |
| M189T796   | 189.0748897 | 796.474 | 5464353.002 |
| M189T260   | 189.0753557 | 259.74  | 2391588.982 |
| M189T811   | 189.0750888 | 811.413 | 6687706.678 |

|            |             |         |             |
|------------|-------------|---------|-------------|
| M189T577   | 189.07519   | 577.366 | 3426055.334 |
| M189T401   | 189.0738835 | 400.59  | 38475722.47 |
| M189T371   | 189.0752295 | 370.777 | 7734035.859 |
| M189T148_2 | 189.075089  | 148.117 | 5843909.42  |
| M189T791   | 189.0905656 | 790.802 | 28895143.94 |
| M189T143_1 | 189.0871053 | 142.85  | 42746619.24 |
| M189T121   | 189.0880438 | 120.525 | 41221010.69 |
| M189T95    | 189.0861978 | 94.7467 | 25708254.08 |
| M189T102   | 189.0944206 | 102.247 | 8366561.637 |
| M189T211   | 189.0943407 | 211.288 | 5741555.454 |
| M189T375   | 189.1017048 | 375.021 | 20856768.69 |
| M189T392   | 189.1014119 | 391.678 | 4860216.167 |
| M189T42    | 189.1115286 | 41.798  | 1268166.25  |
| M189T49    | 189.1115415 | 48.7362 | 2588232.017 |
| M189T357   | 189.1121091 | 356.74  | 2884256.436 |
| M189T66    | 189.1115378 | 65.7101 | 4504796.816 |
| M189T369   | 189.1224365 | 369.321 | 72432555.98 |
| M189T311   | 189.1194689 | 311.445 | 7693623.39  |
| M189T163   | 189.1225964 | 162.728 | 43332793.05 |
| M189T143_2 | 189.1226694 | 142.85  | 36744184.23 |
| M189T323   | 189.1226358 | 322.536 | 30920935.35 |
| M189T152   | 189.1226552 | 152.375 | 21136528.12 |
| M189T218   | 189.1226402 | 217.866 | 44854976.68 |
| M189T124   | 189.1226629 | 124.487 | 3917503.012 |
| M189T107   | 189.1226212 | 106.513 | 41628224.28 |
| M189T38    | 189.1265506 | 38.3208 | 3623458.886 |
| M189T452   | 189.126928  | 451.804 | 9469508.57  |
| M189T358   | 189.1223145 | 357.958 | 19922338.9  |
| M189T456   | 189.1380339 | 456.126 | 134252101.1 |
| M189T84    | 189.159038  | 83.5661 | 142432203.4 |
| M189T669   | 189.1640711 | 668.867 | 41271894.45 |
| M189T649   | 189.164056  | 649.338 | 118368538.8 |
| M189T682   | 189.16394   | 681.885 | 24588301.66 |
| M189T562   | 189.1639158 | 561.955 | 232259356.5 |
| M189T692   | 189.164097  | 692.461 | 25564787.19 |
| M189T719   | 189.1623502 | 719.215 | 30433493.41 |
| M189T703   | 189.1640364 | 703.35  | 125780003.9 |
| M189T545   | 189.1638038 | 545.203 | 67801297.34 |
| M189T576   | 189.1623493 | 575.878 | 14891889.52 |
| M189T78    | 189.170036  | 78.3841 | 5769348.755 |
| M190T791   | 189.5705954 | 790.802 | 12749232.64 |
| M190T639   | 189.5775946 | 639.219 | 1904227.844 |
| M190T415   | 189.5919264 | 414.82  | 608691.7757 |
| M190T38    | 189.9584187 | 38.3208 | 7826150.203 |
| M190T66_1  | 189.9585312 | 65.7101 | 4280589.801 |
| M190T37    | 189.9789777 | 37.1891 | 1112103.458 |
| M190T36    | 189.9961924 | 35.8675 | 8327088.765 |
| M190T49    | 189.996067  | 48.7362 | 2779762.823 |
| M190T65    | 189.9960917 | 64.6213 | 2073902.79  |
| M190T420   | 190.0488083 | 420.274 | 148351777.5 |
| M190T535   | 190.0494467 | 535.329 | 4103261.773 |
| M190T177   | 190.0491738 | 177.295 | 38301731.57 |
| M190T611   | 190.0492632 | 611.145 | 3220552.684 |
| M190T321   | 190.0493566 | 321.198 | 4331715.406 |

|            |             |         |             |
|------------|-------------|---------|-------------|
| M190T211   | 190.0523034 | 211.288 | 14321814.84 |
| M190T572   | 190.0597249 | 571.523 | 472014.2779 |
| M190T270   | 190.0703174 | 269.528 | 4923213.687 |
| M190T97    | 190.0703154 | 96.7698 | 37377254.96 |
| M190T197   | 190.0702616 | 196.644 | 273143472.6 |
| M190T298   | 190.0702751 | 298.135 | 11403296.48 |
| M190T313   | 190.0704734 | 312.85  | 4085768.107 |
| M190T104   | 190.0814631 | 104.493 | 24132393.89 |
| M190T175   | 190.0821935 | 174.865 | 4754402.059 |
| M190T519   | 190.0858173 | 519.257 | 3418355.688 |
| M190T39    | 190.0854938 | 39.4128 | 2248390.257 |
| M190T345   | 190.0858134 | 344.555 | 6456929.808 |
| M190T455   | 190.0859881 | 454.739 | 5780953.646 |
| M190T762   | 190.0860132 | 762.439 | 2327650.327 |
| M190T657   | 190.0835695 | 657.451 | 3960932.822 |
| M190T50    | 190.0855141 | 50.041  | 2619838.728 |
| M190T490   | 190.0858888 | 489.826 | 6413993.215 |
| M190T66_2  | 190.0855051 | 65.7101 | 1624861.396 |
| M190T502   | 190.0858324 | 501.549 | 3569742.24  |
| M190T792   | 190.0937627 | 792.146 | 3214721.182 |
| M190T101   | 190.1074632 | 101.161 | 35701989.04 |
| M190T107   | 190.1066568 | 106.513 | 57104119.67 |
| M190T127   | 190.1066165 | 126.785 | 18843549.54 |
| M190T121   | 190.1067091 | 120.525 | 24008246.33 |
| M190T351   | 190.1085168 | 351.348 | 26727823.43 |
| M190T294   | 190.1061509 | 293.896 | 59743734.52 |
| M190T329   | 190.106972  | 329.481 | 21571232.21 |
| M190T475   | 190.1077536 | 475.007 | 2698413.943 |
| M190T143   | 190.1072781 | 142.85  | 38343031.53 |
| M190T168   | 190.1067058 | 167.804 | 21079286.18 |
| M190T631   | 190.1067583 | 630.507 | 2494716.942 |
| M190T90    | 190.1067013 | 89.6999 | 39320044.49 |
| M190T445   | 190.1069109 | 444.725 | 12748674.63 |
| M190T188   | 190.1068853 | 188.126 | 18846142.3  |
| M190T316   | 190.1083862 | 315.701 | 8058306.463 |
| M190T155   | 190.1072546 | 155.197 | 13243825.23 |
| M190T254   | 190.1059895 | 254.446 | 63937773.73 |
| M190T100   | 190.1180092 | 100.146 | 25253776.74 |
| M190T218   | 190.1259031 | 217.866 | 3762935.342 |
| M190T91    | 190.1178967 | 90.7088 | 13009085.05 |
| M190T84    | 190.1623323 | 83.5661 | 13054811.15 |
| M190T649   | 190.1666378 | 649.338 | 17084207.2  |
| M190T562   | 190.1665655 | 561.955 | 32868766.25 |
| M190T703   | 190.1665527 | 703.35  | 14855232.96 |
| M191T445   | 190.5177705 | 444.725 | 8930557.779 |
| M191T350   | 190.5414604 | 349.911 | 3748663.782 |
| M191T791_1 | 190.5669585 | 790.802 | 5686988.487 |
| M191T75    | 190.9783344 | 74.9588 | 42179692.29 |
| M191T55    | 190.9784162 | 54.867  | 1698236.816 |
| M191T35    | 190.9784079 | 34.5397 | 7550646.771 |
| M191T113   | 190.9858347 | 112.781 | 5896538.116 |
| M191T36    | 190.9925051 | 35.8675 | 104913647   |
| M191T68    | 190.9912656 | 68.0903 | 19849871.82 |
| M191T136   | 190.9924641 | 135.971 | 20001305.96 |

|            |             |         |             |
|------------|-------------|---------|-------------|
| M191T241   | 190.9997076 | 241.368 | 5304736.174 |
| M191T278   | 191.0382084 | 277.699 | 34022611.28 |
| M191T211   | 191.0363801 | 211.288 | 50162933.62 |
| M191T101   | 191.054499  | 101.161 | 12293689.22 |
| M191T420   | 191.0525199 | 420.274 | 15346606.62 |
| M191T132   | 191.0543863 | 131.949 | 29703430.04 |
| M191T298   | 191.0545069 | 298.135 | 17421942.93 |
| M191T148   | 191.0544774 | 148.117 | 84739785.01 |
| M191T144   | 191.065705  | 143.959 | 9681801.335 |
| M191T656   | 191.0694267 | 655.9   | 6512315.295 |
| M191T736   | 191.069746  | 735.7   | 3365398.2   |
| M191T449   | 191.0698349 | 448.978 | 2033816.64  |
| M191T507   | 191.0695343 | 507.343 | 4970114.119 |
| M191T92    | 191.0657576 | 91.7174 | 580076572.5 |
| M191T426   | 191.0656367 | 425.909 | 2360934.786 |
| M191T197   | 191.0732345 | 196.644 | 18766133.78 |
| M191T518   | 191.0811901 | 517.762 | 2903961.725 |
| M191T412   | 191.0809795 | 411.838 | 2280723.315 |
| M191T96    | 191.1020875 | 95.7572 | 77755595.98 |
| M191T294_1 | 191.1099997 | 293.896 | 4455993.676 |
| M191T810   | 191.1058093 | 810.052 | 14963432.12 |
| M191T524   | 191.1062963 | 523.735 | 6032231.859 |
| M191T254   | 191.1099253 | 254.446 | 2992093.272 |
| M191T345   | 191.1171244 | 344.555 | 19017513.52 |
| M191T332   | 191.1198238 | 332.2   | 2365665.078 |
| M191T294_2 | 191.1394112 | 293.896 | 7714538.381 |
| M191T37    | 191.1421895 | 37.1891 | 60375797.01 |
| M191T506   | 191.1426051 | 505.855 | 6867325.78  |
| M191T820   | 191.1428148 | 819.78  | 38218941.77 |
| M191T446   | 191.1535981 | 445.984 | 4775556.799 |
| M191T394   | 191.1535151 | 393.934 | 3045960.854 |
| M191T791_2 | 191.1785121 | 790.802 | 8921393.837 |
| M191T622   | 191.1789856 | 621.708 | 9324062.64  |
| M191T649   | 191.1799766 | 649.338 | 103740935.1 |
| M191T660   | 191.1790162 | 660.455 | 25612102.62 |
| M191T682   | 191.178949  | 681.885 | 11461398.8  |
| M191T670   | 191.1790106 | 670.166 | 21573475.63 |
| M191T562   | 191.1787357 | 561.955 | 56419394.65 |
| M191T692   | 191.1789456 | 692.461 | 13180707.21 |
| M191T719   | 191.1800698 | 719.215 | 25525689.39 |
| M191T703   | 191.1801014 | 703.35  | 86426953.11 |
| M191T586   | 191.1789017 | 585.968 | 7789594.247 |
| M191T545   | 191.1800509 | 545.203 | 25426260.65 |
| M191T632   | 191.1789872 | 631.982 | 13160743.05 |
| M191T734   | 191.1788048 | 734.269 | 6510478.5   |
| M191T772   | 191.1784915 | 772.206 | 15196324.35 |
| M192T279   | 191.5400867 | 279.039 | 4527012.839 |
| M192T390   | 191.5986546 | 390.432 | 5593943.464 |
| M192T308   | 191.6127114 | 307.735 | 2957529.752 |
| M192T60    | 191.9924654 | 59.9075 | 3655633.673 |
| M192T36_1  | 191.9926976 | 35.8675 | 7537591.794 |
| M192T67    | 191.9952738 | 66.9841 | 629746.0959 |
| M192T121   | 192.0280701 | 120.525 | 6740156.766 |
| M192T111   | 192.0280723 | 111.382 | 1777267.439 |

|            |             |         |             |
|------------|-------------|---------|-------------|
| M192T205   | 192.0465898 | 204.747 | 6851965.476 |
| M192T197   | 192.0494894 | 196.644 | 3010467.314 |
| M192T124   | 192.0495092 | 124.487 | 131329891   |
| M192T107_1 | 192.0495486 | 106.513 | 62329506.18 |
| M192T61    | 192.0616877 | 61.1538 | 1131144.295 |
| M192T36_2  | 192.0615189 | 35.8675 | 4188912.164 |
| M192T739   | 192.0613107 | 738.697 | 12776081.65 |
| M192T75    | 192.0616009 | 74.9588 | 230203936.7 |
| M192T751   | 192.0612936 | 751.333 | 9084648.34  |
| M192T762   | 192.0609872 | 762.439 | 7657421.013 |
| M192T51    | 192.0615382 | 51.1942 | 2598745.52  |
| M192T694   | 192.0611015 | 693.81  | 20225899.42 |
| M192T772   | 192.0612765 | 772.206 | 6188242.638 |
| M192T722   | 192.0613453 | 722.193 | 7516647.511 |
| M192T435   | 192.0661453 | 434.589 | 8991603.111 |
| M192T419   | 192.0672391 | 418.97  | 14688202.82 |
| M192T395   | 192.0646965 | 395.264 | 19668510.67 |
| M192T485   | 192.0646944 | 485.471 | 13507468.29 |
| M192T336   | 192.0648751 | 336.344 | 6722797.019 |
| M192T171   | 192.0647766 | 170.665 | 9959897.669 |
| M192T374   | 192.0647128 | 373.532 | 10045260.05 |
| M192T509   | 192.0648044 | 508.883 | 5844681.096 |
| M192T320   | 192.0633417 | 319.758 | 6653982.85  |
| M192T92    | 192.068965  | 91.7174 | 33362492.11 |
| M192T576   | 192.0643903 | 575.878 | 7331319.723 |
| M192T494   | 192.0647188 | 494.289 | 12901054.47 |
| M192T99    | 192.085667  | 98.9918 | 220430535.2 |
| M192T143   | 192.0857498 | 142.85  | 29432270.22 |
| M192T254   | 192.0860935 | 254.446 | 9889488.814 |
| M192T104   | 192.0968629 | 104.493 | 39244801.92 |
| M192T493   | 192.1027878 | 492.895 | 12337238.11 |
| M192T367   | 192.1030342 | 366.514 | 85805302.78 |
| M192T335   | 192.1031452 | 334.966 | 181452496.5 |
| M192T343   | 192.1011962 | 343.226 | 53599930.51 |
| M192T568_1 | 192.1011726 | 568.464 | 4612466.581 |
| M192T107_2 | 192.1223698 | 106.513 | 4578487.259 |
| M192T334   | 192.123824  | 333.715 | 8810569.285 |
| M192T456   | 192.1378134 | 456.126 | 3256557.767 |
| M192T36_3  | 192.1459004 | 35.8675 | 7620611.935 |
| M192T568_2 | 192.1488269 | 568.464 | 3033343.377 |
| M192T50    | 192.145927  | 50.041  | 4061895.451 |
| M192T669   | 192.1820949 | 668.867 | 2858806.537 |
| M192T649   | 192.1822829 | 649.338 | 12798618.57 |
| M192T660   | 192.182143  | 660.455 | 3305571.692 |
| M192T703   | 192.1821669 | 703.35  | 10717288.29 |
| M193T82    | 192.9094841 | 82.0569 | 21560338.13 |
| M193T75    | 192.9760125 | 74.9588 | 25866620.45 |
| M193T36    | 192.9894494 | 35.8675 | 6462176.712 |
| M193T771   | 193.0060374 | 771.042 | 22137405.35 |
| M193T211   | 193.0013331 | 211.288 | 2435400.207 |
| M193T783   | 193.0059993 | 782.558 | 18900142.1  |
| M193T164   | 193.0340612 | 163.846 | 329652756.1 |
| M193T308   | 193.0337186 | 307.735 | 2422011.797 |
| M193T144_1 | 193.0334317 | 143.959 | 15000636.71 |

|            |              |          |              |
|------------|--------------|----------|--------------|
| M193T241_1 | 193. 0377802 | 241. 368 | 5259593. 659 |
| M193T456_1 | 193. 0494645 | 456. 126 | 9766730. 418 |
| M193T144_2 | 193. 0488363 | 143. 959 | 17812972. 68 |
| M193T37    | 193. 0502402 | 37. 1891 | 15776029. 6  |
| M193T158   | 193. 0489964 | 157. 773 | 17240632. 97 |
| M193T122_1 | 193. 0518539 | 122. 007 | 27067117. 8  |
| M193T180   | 193. 0487497 | 179. 75  | 10005820. 03 |
| M193T106   | 193. 0488799 | 105. 503 | 44159795. 26 |
| M193T500_1 | 193. 0494426 | 500. 045 | 34402399. 01 |
| M193T531_1 | 193. 0494062 | 531. 127 | 15961965. 6  |
| M193T291   | 193. 0487616 | 291. 307 | 29286423. 62 |
| M193T628   | 193. 050161  | 627. 58  | 19333504. 73 |
| M193T171   | 193. 0508815 | 170. 665 | 7541553. 895 |
| M193T94    | 193. 0486886 | 93. 7378 | 9306931. 464 |
| M193T545_1 | 193. 0490674 | 545. 203 | 12707499. 51 |
| M193T406   | 193. 0490714 | 406. 289 | 11206371. 57 |
| M193T287   | 193. 0599169 | 287. 148 | 1434733. 018 |
| M193T228   | 193. 0675957 | 227. 633 | 3589473. 053 |
| M193T101   | 193. 0698965 | 101. 161 | 89491481. 48 |
| M193T122_2 | 193. 0699338 | 122. 007 | 33960875. 68 |
| M193T167   | 193. 0714927 | 166. 613 | 4304545. 825 |
| M193T143   | 193. 0698953 | 142. 85  | 11931460. 57 |
| M193T777   | 193. 0699316 | 777. 245 | 2663480. 504 |
| M193T456_2 | 193. 0869721 | 456. 126 | 8818155. 533 |
| M193T477   | 193. 0855675 | 476. 554 | 8385599. 356 |
| M193T540   | 193. 0855504 | 539. 764 | 6982723. 597 |
| M193T430   | 193. 0848988 | 430. 131 | 28359506. 29 |
| M193T500_2 | 193. 0855381 | 500. 045 | 9446942. 58  |
| M193T554   | 193. 0855095 | 553. 936 | 30416353. 54 |
| M193T531_2 | 193. 0854897 | 531. 127 | 12120356. 11 |
| M193T100   | 193. 0890584 | 100. 146 | 6917354. 031 |
| M193T418   | 193. 0848782 | 417. 676 | 150430435. 4 |
| M193T698   | 193. 0864795 | 697. 952 | 6603535. 079 |
| M193T446   | 193. 0867239 | 445. 984 | 11435208. 87 |
| M193T631   | 193. 086575  | 630. 507 | 21799238. 88 |
| M193T374   | 193. 0855461 | 373. 532 | 6946771. 944 |
| M193T468   | 193. 0855085 | 467. 706 | 5729401. 574 |
| M193T515   | 193. 0869158 | 514. 727 | 25422716. 55 |
| M193T394   | 193. 0856258 | 393. 934 | 10838777. 18 |
| M193T357   | 193. 0854123 | 356. 74  | 3201029. 835 |
| M193T487   | 193. 0855944 | 486. 885 | 6183663. 641 |
| M193T779   | 193. 085551  | 778. 543 | 17656782. 52 |
| M193T403   | 193. 0854474 | 403. 447 | 12015016. 21 |
| M193T384   | 193. 0855516 | 383. 536 | 9551529. 299 |
| M193T614   | 193. 0842153 | 614. 215 | 27847702. 88 |
| M193T677   | 193. 0866115 | 677. 376 | 11516893. 27 |
| M193T241_2 | 193. 0961195 | 241. 368 | 39402776. 38 |
| M193T306   | 193. 0969779 | 306. 247 | 11093487. 73 |
| M193T339   | 193. 0969854 | 339. 085 | 13596966. 64 |
| M193T118   | 193. 0965606 | 118. 116 | 18814991. 79 |
| M193T324   | 193. 0970059 | 323. 984 | 14229368. 3  |
| M193T57    | 193. 1218334 | 57. 4179 | 2912354. 149 |
| M193T51    | 193. 1218721 | 51. 1942 | 1950818. 996 |
| M193T39    | 193. 1217689 | 39. 4128 | 3558680. 409 |



|            |              |          |              |
|------------|--------------|----------|--------------|
| M193T796   | 193. 1203718 | 796. 474 | 262974803    |
| M193T32    | 193. 1218074 | 32. 4171 | 2991601. 771 |
| M193T834   | 193. 1203623 | 834. 486 | 84294139. 92 |
| M193T67    | 193. 1218636 | 66. 9841 | 2257094. 997 |
| M193T311   | 193. 1329975 | 311. 445 | 2192348. 621 |
| M193T203   | 193. 1328401 | 203. 36  | 2238948. 469 |
| M193T188   | 193. 1330043 | 188. 126 | 2742894. 393 |
| M193T361   | 193. 1328179 | 360. 794 | 3513796. 376 |
| M193T562   | 193. 1580508 | 561. 955 | 8421409. 57  |
| M193T751   | 193. 1580834 | 751. 333 | 32106148. 29 |
| M193T545_2 | 193. 1579048 | 545. 203 | 3568300. 377 |
| M194T36    | 193. 5031696 | 35. 8675 | 1414813. 526 |
| M194T365_1 | 193. 5409198 | 365. 061 | 1977682. 391 |
| M194T39    | 193. 9882578 | 39. 4128 | 29108434. 87 |
| M194T68    | 193. 9882238 | 68. 0903 | 13752761. 5  |
| M194T241_1 | 194. 0285505 | 241. 368 | 3957302. 04  |
| M194T82    | 194. 0315208 | 82. 0569 | 10737453. 81 |
| M194T164   | 194. 0375653 | 163. 846 | 19631645. 71 |
| M194T127   | 194. 0474979 | 126. 785 | 4392397. 922 |
| M194T90    | 194. 0653304 | 89. 6999 | 11673673. 36 |
| M194T453   | 194. 0811097 | 453. 317 | 25433729. 69 |
| M194T293   | 194. 0802004 | 292. 623 | 39792995. 31 |
| M194T167   | 194. 0804523 | 166. 613 | 15178031. 3  |
| M194T481   | 194. 0811441 | 481. 042 | 142318191. 9 |
| M194T233   | 194. 081434  | 233. 081 | 72293301. 41 |
| M194T506   | 194. 0811498 | 505. 855 | 102012347    |
| M194T465   | 194. 0802018 | 464. 668 | 285560043. 7 |
| M194T378   | 194. 0802265 | 377. 704 | 17010850. 95 |
| M194T331   | 194. 0814732 | 330. 809 | 10426943. 41 |
| M194T440   | 194. 0811494 | 440. 459 | 27585895. 67 |
| M194T194   | 194. 0804635 | 193. 823 | 20015796. 9  |
| M194T304   | 194. 081612  | 303. 513 | 31992999. 57 |
| M194T694   | 194. 081996  | 693. 81  | 15597093. 37 |
| M194T426   | 194. 0804939 | 425. 909 | 41668149. 06 |
| M194T317   | 194. 0816351 | 317. 199 | 18433119. 75 |
| M194T313   | 194. 0919947 | 312. 85  | 5827085. 194 |
| M194T418   | 194. 0915766 | 417. 676 | 6844943. 422 |
| M194T614   | 194. 0893908 | 614. 215 | 2415324. 602 |
| M194T92    | 194. 1017362 | 91. 7174 | 27404591. 73 |
| M194T86    | 194. 101625  | 85. 6453 | 25047688. 77 |
| M194T241_2 | 194. 0999871 | 241. 368 | 2968396. 611 |
| M194T603   | 194. 1172463 | 602. 513 | 9772280. 814 |
| M194T37    | 194. 1167174 | 37. 1891 | 3319870. 472 |
| M194T522   | 194. 1147658 | 522. 177 | 3484452. 611 |
| M194T626   | 194. 1170436 | 626. 042 | 13135383. 09 |
| M194T350   | 194. 1170902 | 349. 911 | 13518979. 26 |
| M194T297   | 194. 1170605 | 296. 739 | 7492587. 736 |
| M194T48    | 194. 1167111 | 47. 6391 | 2133727. 188 |
| M194T758   | 194. 1170027 | 758. 236 | 26699689. 33 |
| M194T62    | 194. 1167674 | 62. 1777 | 2538664. 292 |
| M194T327   | 194. 1170286 | 326. 78  | 11292233. 31 |
| M194T832   | 194. 1247881 | 831. 709 | 2789064. 506 |
| M194T365_2 | 194. 1184707 | 365. 061 | 7040939. 191 |
| M194T392   | 194. 1282749 | 391. 678 | 3329982. 346 |

|            |              |          |              |
|------------|--------------|----------|--------------|
| M194T807   | 194. 1251978 | 807. 232 | 10440734. 79 |
| M194T795   | 194. 1253996 | 795. 165 | 22218740. 99 |
| M194T396   | 194. 1388162 | 396. 415 | 55627864. 72 |
| M194T535   | 194. 1536341 | 535. 329 | 7437230. 607 |
| M194T771   | 194. 1534071 | 771. 042 | 1877958. 15  |
| M194T604   | 194. 1647675 | 603. 95  | 2146438. 822 |
| M195T270   | 194. 5124696 | 269. 528 | 2681141. 92  |
| M195T261   | 194. 5123552 | 261. 177 | 4718131. 036 |
| M195T443_1 | 194. 5277296 | 443. 256 | 5179318. 249 |
| M195T283   | 194. 5304455 | 282. 886 | 3110483. 161 |
| M195T123   | 194. 5306858 | 123. 262 | 24076195. 02 |
| M195T78    | 194. 6124468 | 78. 3841 | 3387806. 914 |
| M195T76    | 194. 9742479 | 76. 0874 | 7615798. 401 |
| M195T35    | 194. 9849947 | 34. 5397 | 1075951. 432 |
| M195T754   | 195. 0190993 | 753. 987 | 3850277. 805 |
| M195T372   | 195. 0275866 | 372. 152 | 50197775. 45 |
| M195T663   | 195. 0281394 | 663. 287 | 3083049. 005 |
| M195T171   | 195. 0463398 | 170. 665 | 33278255. 75 |
| M195T341   | 195. 0619014 | 340. 548 | 2419997. 622 |
| M195T456   | 195. 0662599 | 456. 126 | 33949858. 16 |
| M195T644   | 195. 0644544 | 643. 727 | 5563643. 839 |
| M195T538   | 195. 0663082 | 538. 316 | 46650044. 54 |
| M195T108   | 195. 064529  | 107. 537 | 5910112. 167 |
| M195T548   | 195. 066109  | 548. 114 | 24108170. 55 |
| M195T443_2 | 195. 0631429 | 443. 256 | 20318795. 2  |
| M195T406   | 195. 0630181 | 406. 289 | 8870172. 781 |
| M195T608   | 195. 0645349 | 608. 261 | 9365220. 584 |
| M195T419   | 195. 0771106 | 418. 97  | 8898323. 68  |
| M195T287   | 195. 0755658 | 287. 148 | 14385362. 83 |
| M195T321_1 | 195. 0760236 | 321. 198 | 10885375. 88 |
| M195T106   | 195. 0758606 | 105. 503 | 4550379. 755 |
| M195T465   | 195. 0837966 | 464. 668 | 28979345. 19 |
| M195T304   | 195. 0846917 | 303. 513 | 1861828. 603 |
| M195T234   | 195. 0835692 | 234. 447 | 6332351. 858 |
| M195T191   | 195. 0857425 | 190. 962 | 6282612. 116 |
| M195T148   | 195. 0857891 | 148. 117 | 6764185. 385 |
| M195T45    | 195. 1009202 | 45. 3435 | 1929944. 461 |
| M195T51    | 195. 100926  | 51. 1942 | 1778816. 394 |
| M195T38    | 195. 1009022 | 38. 3208 | 1450671. 032 |
| M195T725   | 195. 1011781 | 725. 212 | 30253126. 62 |
| M195T582   | 195. 1011374 | 581. 625 | 7205878. 088 |
| M195T451   | 195. 1012395 | 450. 503 | 4202847. 928 |
| M195T833   | 195. 1005793 | 833. 029 | 29182562. 73 |
| M195T777   | 195. 1011999 | 777. 245 | 16240446. 75 |
| M195T740   | 195. 1009346 | 740. 014 | 10787900. 18 |
| M195T66    | 195. 1009463 | 65. 7101 | 1490581. 229 |
| M195T435   | 195. 1117832 | 434. 589 | 5099739. 312 |
| M195T308   | 195. 1121867 | 307. 735 | 15569296. 84 |
| M195T420   | 195. 1115943 | 420. 274 | 6479066. 425 |
| M195T97    | 195. 1122251 | 96. 7698 | 18813004. 78 |
| M195T533   | 195. 1117061 | 532. 526 | 10562628. 24 |
| M195T751   | 195. 1140904 | 751. 333 | 6255325. 82  |
| M195T218   | 195. 1123378 | 217. 866 | 6309858. 752 |
| M195T201   | 195. 112277  | 200. 766 | 9880420. 586 |

|            |              |          |              |
|------------|--------------|----------|--------------|
| M195T487   | 195. 1131769 | 486. 885 | 13248809. 29 |
| M195T463   | 195. 1116493 | 463. 271 | 12699274. 06 |
| M195T321_2 | 195. 113787  | 321. 198 | 12591882. 78 |
| M195T104_1 | 195. 1121783 | 104. 493 | 24997002. 12 |
| M195T358   | 195. 112211  | 357. 958 | 41035821. 84 |
| M195T386   | 195. 1116719 | 386. 352 | 29812563. 72 |
| M195T282   | 195. 1225861 | 281. 666 | 26803122. 28 |
| M195T243   | 195. 1226373 | 242. 682 | 11629304. 29 |
| M195T260   | 195. 1225153 | 259. 74  | 7085176. 29  |
| M195T41    | 195. 1221836 | 40. 6031 | 1473329. 786 |
| M195T69    | 195. 1218043 | 69. 2834 | 1238602. 497 |
| M195T521   | 195. 1157058 | 520. 739 | 9610299. 393 |
| M195T299   | 195. 1227565 | 299. 493 | 5070797. 276 |
| M195T313   | 195. 1280697 | 312. 85  | 1342994. 125 |
| M195T376   | 195. 1233137 | 376. 409 | 19761881. 97 |
| M195T794   | 195. 1371105 | 793. 649 | 12397266. 34 |
| M195T665   | 195. 1374556 | 664. 745 | 9362693. 621 |
| M195T680   | 195. 1374636 | 680. 402 | 7599771. 723 |
| M195T816   | 195. 1371698 | 815. 517 | 16385970. 66 |
| M195T775   | 195. 137029  | 774. 919 | 4684266. 178 |
| M195T838   | 195. 1371784 | 837. 524 | 9109345. 632 |
| M195T747   | 195. 1372353 | 746. 977 | 12398246. 03 |
| M195T625   | 195. 1374395 | 624. 608 | 7486260. 349 |
| M195T760   | 195. 1372328 | 759. 605 | 12054580. 9  |
| M195T737   | 195. 1374141 | 737. 198 | 18092105. 15 |
| M195T705   | 195. 1390899 | 704. 715 | 65454091. 3  |
| M195T594   | 195. 1386831 | 593. 62  | 11067376. 61 |
| M195T823   | 195. 1390039 | 822. 881 | 19644852. 34 |
| M195T534   | 195. 1568247 | 533. 958 | 702084. 7676 |
| M195T104_2 | 195. 1600186 | 104. 493 | 21736672. 9  |
| M196T331   | 195. 5972188 | 330. 809 | 2106124. 498 |
| M196T751   | 195. 615975  | 751. 333 | 1426372. 716 |
| M196T282   | 195. 6244329 | 281. 666 | 3258754. 994 |
| M196T137   | 195. 9582618 | 137. 373 | 6909870. 322 |
| M196T67    | 195. 9581034 | 66. 9841 | 4590621. 554 |
| M196T56    | 195. 9581467 | 56. 1096 | 5529301. 999 |
| M196T36    | 195. 9927023 | 35. 8675 | 69794745. 2  |
| M196T784   | 195. 9949115 | 783. 78  | 825141670. 6 |
| M196T66    | 195. 9941561 | 65. 7101 | 33857639. 98 |
| M196T113   | 196. 0075498 | 112. 781 | 10640993. 23 |
| M196T785   | 196. 0159348 | 785. 136 | 46500497. 68 |
| M196T807   | 196. 0182031 | 807. 232 | 28834933. 1  |
| M196T698   | 196. 0161254 | 697. 952 | 31911735. 89 |
| M196T728   | 196. 018337  | 728. 25  | 235032058    |
| M196T758   | 196. 0156439 | 758. 236 | 146838483. 2 |
| M196T832   | 196. 0181516 | 831. 709 | 8731469. 445 |
| M196T690   | 196. 0155517 | 689. 5   | 41326218. 33 |
| M196T35    | 196. 0161174 | 34. 5397 | 26073387. 88 |
| M196T325   | 196. 0275601 | 325. 35  | 2934032. 614 |
| M196T203   | 196. 0597644 | 203. 36  | 16567124. 51 |
| M196T143   | 196. 0598631 | 142. 85  | 17180535. 19 |
| M196T192   | 196. 0597305 | 192. 437 | 16008677. 38 |
| M196T342   | 196. 0597893 | 341. 802 | 9877752. 364 |
| M196T361   | 196. 0598259 | 360. 794 | 5667956. 417 |

|            |              |          |              |
|------------|--------------|----------|--------------|
| M196T321   | 196. 059738  | 321. 198 | 11750835. 53 |
| M196T413   | 196. 0603709 | 413. 295 | 13812500. 5  |
| M196T100   | 196. 0612606 | 100. 146 | 35590166. 59 |
| M196T452   | 196. 0617889 | 451. 804 | 10621215. 52 |
| M196T311   | 196. 0971533 | 311. 445 | 43198130. 48 |
| M196T147   | 196. 0968914 | 146. 742 | 22860796. 09 |
| M196T474   | 196. 097138  | 473. 597 | 21458300. 78 |
| M196T345_1 | 196. 0972207 | 344. 555 | 27367661. 79 |
| M196T334   | 196. 0972118 | 333. 715 | 41784297. 68 |
| M196T676   | 196. 0961113 | 675. 866 | 14727553. 31 |
| M196T302   | 196. 0971921 | 302. 191 | 45798422. 67 |
| M196T592   | 196. 0952949 | 592. 067 | 48157997. 41 |
| M196T403   | 196. 0971245 | 403. 447 | 23464359. 01 |
| M196T358   | 196. 0971049 | 357. 958 | 61692869. 71 |
| M196T442   | 196. 0971053 | 442. 005 | 28132200. 92 |
| M196T107   | 196. 097226  | 106. 513 | 49264348. 05 |
| M196T429   | 196. 0971286 | 428. 735 | 21333156. 96 |
| M196T386   | 196. 0972116 | 386. 352 | 23140849. 93 |
| M196T308   | 196. 1081195 | 307. 735 | 16699709. 43 |
| M196T390   | 196. 111009  | 390. 432 | 2487316. 814 |
| M196T345_2 | 196. 1079329 | 344. 555 | 62662376. 79 |
| M196T264   | 196. 1073746 | 264. 079 | 5689247. 323 |
| M196T323   | 196. 1080221 | 322. 536 | 13402734. 3  |
| M196T388   | 196. 1325899 | 387. 763 | 3168318. 088 |
| M196T613   | 196. 1326266 | 612. 699 | 7468631. 831 |
| M196T719   | 196. 1325884 | 719. 215 | 6184563. 277 |
| M196T484   | 196. 1326647 | 483. 973 | 12766149. 77 |
| M196T212   | 196. 1327058 | 212. 448 | 7403325. 69  |
| M196T705   | 196. 1407454 | 704. 715 | 7261053. 644 |
| M196T48    | 196. 153784  | 47. 6391 | 2900723. 603 |
| M196T389   | 196. 1631689 | 389. 035 | 2816487. 422 |
| M197T420_1 | 196. 5547872 | 420. 274 | 712639. 7784 |
| M197T809   | 196. 9955961 | 808. 678 | 8349793. 93  |
| M197T36    | 196. 992667  | 35. 8675 | 5616935. 683 |
| M197T794   | 196. 9930264 | 793. 649 | 6902521. 282 |
| M197T832   | 196. 9927895 | 831. 709 | 2436516. 012 |
| M197T49    | 196. 9928633 | 48. 7362 | 1907194. 82  |
| M197T74    | 197. 0398856 | 73. 8324 | 55801749. 82 |
| M197T122   | 197. 0472879 | 122. 007 | 1033596. 708 |
| M197T254   | 197. 0516082 | 254. 446 | 673021. 1483 |
| M197T558   | 197. 0801815 | 557. 967 | 7873687. 939 |
| M197T462   | 197. 0800791 | 461. 845 | 18632310     |
| M197T487   | 197. 0801858 | 486. 885 | 21616206. 23 |
| M197T372_1 | 197. 0803151 | 372. 152 | 3660582. 024 |
| M197T420_2 | 197. 0804045 | 420. 274 | 6139585. 549 |
| M197T676   | 197. 0801894 | 675. 866 | 4737708. 355 |
| M197T597   | 197. 080371  | 596. 628 | 5679027. 776 |
| M197T158   | 197. 0914553 | 157. 773 | 14003025. 6  |
| M197T190   | 197. 0912868 | 189. 571 | 13492247. 95 |
| M197T180   | 197. 0914708 | 179. 75  | 16434714. 67 |
| M197T445   | 197. 0913723 | 444. 725 | 4788635. 189 |
| M197T316   | 197. 093667  | 315. 701 | 23251461. 35 |
| M197T396   | 197. 0931642 | 396. 415 | 12635987. 98 |
| M197T104_1 | 197. 0914554 | 104. 493 | 5704335. 527 |

|            |             |         |             |
|------------|-------------|---------|-------------|
| M197T284   | 197.0913818 | 284.377 | 23564603.69 |
| M197T353   | 197.102487  | 352.65  | 7656558.908 |
| M197T432   | 197.0956075 | 431.64  | 1711742.336 |
| M197T420_3 | 197.0956963 | 420.274 | 1354021.712 |
| M197T592   | 197.0998578 | 592.067 | 4342889.014 |
| M197T372_2 | 197.1151238 | 372.152 | 24141683.5  |
| M197T328   | 197.1150194 | 328.106 | 38740766.65 |
| M197T565   | 197.1165353 | 564.534 | 7714779.451 |
| M197T488   | 197.1173445 | 488.437 | 9786374.913 |
| M197T548   | 197.1165129 | 548.114 | 18393505.55 |
| M197T761   | 197.1157908 | 760.916 | 75630576.07 |
| M197T830   | 197.1182834 | 830.193 | 7870408.452 |
| M197T341   | 197.1187869 | 340.548 | 14915355.9  |
| M197T576   | 197.1187042 | 575.878 | 19440686.3  |
| M197T184   | 197.1276567 | 183.886 | 11972219.5  |
| M197T206   | 197.1276857 | 205.903 | 4757077.985 |
| M197T439   | 197.1285897 | 439.021 | 63879115.42 |
| M197T411   | 197.1279279 | 410.542 | 9039328.782 |
| M197T159   | 197.127919  | 159.017 | 6281560.18  |
| M197T427   | 197.1285212 | 427.362 | 7733376.144 |
| M197T359   | 197.1278893 | 359.32  | 18619539.64 |
| M197T104_2 | 197.1278948 | 104.493 | 17559816.33 |
| M197T339   | 197.1384242 | 339.085 | 118039519   |
| M197T429   | 197.142302  | 428.735 | 3325763.558 |
| M197T709   | 197.1530292 | 709.106 | 4936829.169 |
| M198T466_1 | 197.5493276 | 466.162 | 1441400.5   |
| M198T359_1 | 197.5524563 | 359.32  | 2744282.097 |
| M198T261   | 197.549004  | 261.177 | 7834817.81  |
| M198T638   | 197.5568343 | 637.996 | 2630307.196 |
| M198T328   | 197.617446  | 328.106 | 6805167.039 |
| M198T346   | 197.6133262 | 345.848 | 4072896.457 |
| M198T709   | 197.6250813 | 709.106 | 3346384.51  |
| M198T36    | 197.9921112 | 35.8675 | 22862762.34 |
| M198T68    | 198.0003592 | 68.0903 | 3101443.643 |
| M198T211   | 198.006536  | 211.288 | 37793102.61 |
| M198T746   | 198.0176084 | 745.603 | 11411063    |
| M198T727   | 198.016839  | 726.707 | 7651954.957 |
| M198T788   | 198.017685  | 787.856 | 72644291.46 |
| M198T754   | 198.0167797 | 753.987 | 11940994.79 |
| M198T736   | 198.0145461 | 735.7   | 12807142.04 |
| M198T762   | 198.0167024 | 762.439 | 12476698.97 |
| M198T122   | 198.0241427 | 122.007 | 4199258.266 |
| M198T114   | 198.024129  | 114.15  | 4163067.586 |
| M198T168   | 198.021179  | 167.804 | 8394333.138 |
| M198T110   | 198.0392597 | 110.047 | 5964065.598 |
| M198T557   | 198.0755401 | 556.816 | 2176283.338 |
| M198T435   | 198.0760172 | 434.589 | 10076485.45 |
| M198T496   | 198.075457  | 495.779 | 5141173.046 |
| M198T271   | 198.0753576 | 270.983 | 13234568.92 |
| M198T106   | 198.0753715 | 105.503 | 22167965.91 |
| M198T172   | 198.0753834 | 171.935 | 23420638.76 |
| M198T152_1 | 198.0761835 | 152.375 | 58116163.74 |
| M198T425   | 198.0756713 | 424.572 | 6691601.682 |
| M198T466_2 | 198.0760249 | 466.162 | 17007861.44 |

|            |             |         |             |
|------------|-------------|---------|-------------|
| M198T164   | 198.0866189 | 163.846 | 34905112.53 |
| M198T144   | 198.086505  | 143.959 | 7484773.196 |
| M198T152_2 | 198.0866274 | 152.375 | 8261134.288 |
| M198T234   | 198.0867746 | 234.447 | 651699.8435 |
| M198T101   | 198.0964278 | 101.161 | 71095122.41 |
| M198T93    | 198.096165  | 92.7272 | 191142147.2 |
| M198T632   | 198.0957285 | 631.982 | 5056424.656 |
| M198T478   | 198.105541  | 477.989 | 3742122.681 |
| M198T308   | 198.1118805 | 307.735 | 29528118.63 |
| M198T558   | 198.1129875 | 557.967 | 5477869.874 |
| M198T500   | 198.11185   | 500.045 | 5638623.957 |
| M198T167   | 198.1116927 | 166.613 | 18301553.49 |
| M198T393   | 198.1125031 | 392.715 | 35037758.22 |
| M198T334   | 198.1097076 | 333.715 | 17551257.95 |
| M198T446   | 198.1119922 | 445.984 | 6838472.789 |
| M198T521   | 198.1123219 | 520.739 | 9222020.536 |
| M198T104   | 198.1122503 | 104.493 | 35299054.31 |
| M198T306   | 198.1229168 | 306.247 | 19525273.24 |
| M198T323   | 198.1229545 | 322.536 | 11467939.09 |
| M198T85    | 198.1257218 | 84.5768 | 50436225.37 |
| M198T359_2 | 198.1307617 | 359.32  | 1005720.53  |
| M198T688   | 198.1482503 | 687.95  | 3395846.265 |
| M198T598   | 198.1481118 | 598.125 | 10752114.75 |
| M198T518   | 198.1599407 | 517.762 | 117807380.5 |
| M199T75    | 198.939389  | 74.9588 | 9763064.287 |
| M199T663   | 199.0285398 | 663.287 | 33231169.35 |
| M199T644   | 199.0285552 | 643.727 | 28447516.93 |
| M199T709   | 199.0285574 | 709.106 | 25135750.35 |
| M199T655   | 199.0285373 | 654.542 | 22137875.68 |
| M199T35    | 199.0293394 | 34.5397 | 17667910.3  |
| M199T522   | 199.0310933 | 522.177 | 13318132.39 |
| M199T540   | 199.0311565 | 539.764 | 18173129.43 |
| M199T531   | 199.0310785 | 531.127 | 20813681.45 |
| M199T503   | 199.0309308 | 503.046 | 22684701.23 |
| M199T515   | 199.0309099 | 514.727 | 18052477.81 |
| M199T698   | 199.0305904 | 697.952 | 27135574.38 |
| M199T572   | 199.0303268 | 571.523 | 65035632.05 |
| M199T552   | 199.0310579 | 552.452 | 22632985.94 |
| M199T143   | 199.0593262 | 142.85  | 19562528.12 |
| M199T177   | 199.0572336 | 177.295 | 19301907.46 |
| M199T376   | 199.0594645 | 376.409 | 5087418.66  |
| M199T293   | 199.0603785 | 292.623 | 37938011.25 |
| M199T106_1 | 199.0609519 | 105.503 | 80212949.87 |
| M199T144   | 199.0704438 | 143.959 | 8426403.869 |
| M199T159   | 199.0705914 | 159.017 | 9544461.425 |
| M199T172   | 199.0706271 | 171.935 | 7850978.298 |
| M199T462   | 199.0851268 | 461.845 | 17736990    |
| M199T525_1 | 199.0861233 | 525.132 | 2412603.763 |
| M199T456   | 199.0960617 | 456.126 | 4959073.271 |
| M199T577   | 199.0964512 | 577.366 | 34532958.96 |
| M199T548   | 199.0960507 | 548.114 | 12046611.68 |
| M199T164   | 199.1071553 | 163.846 | 22932874.07 |
| M199T639   | 199.1097859 | 639.219 | 23310667.03 |
| M199T537   | 199.1105323 | 536.761 | 7286983.08  |

|            |              |          |              |
|------------|--------------|----------|--------------|
| M199T338   | 199. 1088058 | 337. 767 | 361537492. 5 |
| M199T87    | 199. 1071099 | 86. 6643 | 54535731. 32 |
| M199T316   | 199. 1071975 | 315. 701 | 24363160. 61 |
| M199T195   | 199. 1071348 | 195. 23  | 12594958. 94 |
| M199T525_2 | 199. 1104667 | 525. 132 | 48917308. 82 |
| M199T494   | 199. 1095277 | 494. 289 | 9556102. 861 |
| M199T567   | 199. 1099641 | 567. 1   | 245717452. 7 |
| M199T305   | 199. 1071523 | 304. 777 | 15670851. 64 |
| M199T270   | 199. 1184645 | 269. 528 | 15136932. 65 |
| M199T207   | 199. 1182559 | 207. 393 | 4238244. 855 |
| M199T106_2 | 199. 118008  | 105. 503 | 25170523. 42 |
| M199T791   | 199. 1324571 | 790. 802 | 820119262    |
| M199T833   | 199. 1302421 | 833. 029 | 66835462. 95 |
| M199T549   | 199. 1320953 | 549. 375 | 4308895. 127 |
| M199T484   | 199. 1324336 | 483. 973 | 3645428. 447 |
| M199T493   | 199. 144221  | 492. 895 | 2515992. 055 |
| M199T562   | 199. 1474479 | 561. 955 | 13404907. 86 |
| M199T545   | 199. 1472193 | 545. 203 | 4554344. 763 |
| M199T318   | 199. 1465824 | 318. 497 | 5541252. 02  |
| M199T31    | 199. 1813234 | 31. 4047 | 6912244. 381 |
| M200T403   | 199. 9536454 | 403. 447 | 2127549. 846 |
| M200T61    | 199. 9746986 | 61. 1538 | 9997058. 838 |
| M200T69_1  | 199. 9746614 | 69. 2834 | 6409455. 532 |
| M200T35    | 199. 9757317 | 34. 5397 | 29435328. 49 |
| M200T686   | 199. 9897245 | 686. 47  | 42339217. 73 |
| M200T727   | 199. 989769  | 726. 707 | 51303825. 75 |
| M200T665   | 199. 9864272 | 664. 745 | 42913394     |
| M200T626   | 199. 9864639 | 626. 042 | 238066509. 8 |
| M200T135   | 199. 9873335 | 134. 574 | 26492489. 18 |
| M200T698   | 199. 9864932 | 697. 952 | 45883987. 86 |
| M200T709   | 199. 9865887 | 709. 106 | 64079695. 22 |
| M200T152   | 199. 9867982 | 152. 375 | 12448200. 02 |
| M200T69_2  | 199. 987345  | 69. 2834 | 43499676. 03 |
| M200T747   | 199. 9866865 | 746. 977 | 54381370. 47 |
| M200T677   | 199. 9897281 | 677. 376 | 43392267. 62 |
| M200T36    | 199. 9873681 | 35. 8675 | 342965784. 6 |
| M200T73    | 200. 0392126 | 72. 6708 | 10778924. 27 |
| M200T211   | 200. 0398119 | 211. 288 | 5042385. 773 |
| M200T419   | 200. 0486857 | 418. 97  | 12482959. 07 |
| M200T90    | 200. 0433024 | 89. 6999 | 12060920. 74 |
| M200T402   | 200. 0447538 | 401. 963 | 1491155659   |
| M200T202   | 200. 05474   | 202. 149 | 3577947. 303 |
| M200T190_1 | 200. 0543789 | 189. 571 | 4038268. 183 |
| M200T297   | 200. 0546985 | 296. 739 | 2929685. 112 |
| M200T118   | 200. 0661104 | 118. 116 | 3905588. 342 |
| M200T74    | 200. 0761924 | 73. 8324 | 7010852. 868 |
| M200T351   | 200. 0913174 | 351. 348 | 18646473. 08 |
| M200T190_2 | 200. 0909966 | 189. 571 | 11141684. 48 |
| M200T418   | 200. 0908732 | 417. 676 | 7908618. 638 |
| M200T143_1 | 200. 0911313 | 142. 85  | 16578652. 12 |
| M200T323   | 200. 0929859 | 322. 536 | 44950239. 45 |
| M200T594   | 200. 0938357 | 593. 62  | 6804649. 34  |
| M200T121_1 | 200. 0911951 | 120. 525 | 29526374. 47 |
| M200T401   | 200. 0908362 | 400. 59  | 12060702. 22 |

|            |             |         |             |
|------------|-------------|---------|-------------|
| M200T381   | 200.091344  | 380.63  | 18373064.31 |
| M200T91    | 200.0910567 | 90.7088 | 24519568.92 |
| M200T365   | 200.0904979 | 365.061 | 16244925.38 |
| M200T155   | 200.0911044 | 155.197 | 18127880.46 |
| M200T104_1 | 200.0913308 | 104.493 | 56281582.26 |
| M200T293   | 200.1020719 | 292.623 | 62396556.22 |
| M200T260   | 200.1020652 | 259.74  | 11700284.81 |
| M200T214   | 200.1020661 | 213.872 | 406154131.9 |
| M200T198   | 200.1020561 | 198.072 | 150188535.8 |
| M200T474   | 200.1060784 | 473.597 | 16913688.38 |
| M200T106_1 | 200.1023305 | 105.503 | 7421486.995 |
| M200T336   | 200.1089054 | 336.344 | 34107928.24 |
| M200T639   | 200.1147355 | 639.219 | 2991815.031 |
| M200T708   | 200.127491  | 707.557 | 2836362.215 |
| M200T160   | 200.1269681 | 160.369 | 36949912.39 |
| M200T143_2 | 200.1275223 | 142.85  | 28182143.59 |
| M200T121_2 | 200.1269138 | 120.525 | 62469254.11 |
| M200T104_2 | 200.1275271 | 104.493 | 192705965   |
| M200T791   | 200.1352582 | 790.802 | 93061083.99 |
| M200T106_2 | 200.1385821 | 105.503 | 4689776.535 |
| M200T655   | 200.1637635 | 654.542 | 86104766.72 |
| M201T358   | 200.5728337 | 357.958 | 3989271.423 |
| M201T584   | 200.5802645 | 584.417 | 2484182.967 |
| M201T777   | 200.6105834 | 777.245 | 4084877.821 |
| M201T49    | 200.9707089 | 48.7362 | 22596847.36 |
| M201T276   | 200.9715106 | 276.414 | 19619772.68 |
| M201T74    | 200.9738022 | 73.8324 | 175457679.4 |
| M201T456   | 200.9946362 | 456.126 | 834335.2092 |
| M201T60    | 200.9936399 | 59.9075 | 3696696.742 |
| M201T31    | 200.993485  | 31.4047 | 10684707.5  |
| M201T69    | 200.9936715 | 69.2834 | 2376559.542 |
| M201T42    | 200.9936118 | 41.798  | 16847391.13 |
| M201T50    | 200.9936288 | 50.041  | 8633644.009 |
| M201T36    | 201.0077785 | 35.8675 | 9620531.972 |
| M201T63    | 201.0056066 | 63.4448 | 10699848.33 |
| M201T45    | 201.0077356 | 45.3435 | 7501220.328 |
| M201T82    | 201.0165613 | 82.0569 | 7898513.309 |
| M201T685   | 201.0388789 | 684.985 | 3992982.451 |
| M201T197_1 | 201.0362465 | 196.644 | 735754.0876 |
| M201T126   | 201.0517131 | 125.598 | 26913033.29 |
| M201T402   | 201.052213  | 401.963 | 112038502.1 |
| M201T75    | 201.0600754 | 74.9588 | 32237976.69 |
| M201T452   | 201.0753835 | 451.804 | 3387058.118 |
| M201T378   | 201.0749842 | 377.704 | 25114163.27 |
| M201T144   | 201.0861816 | 143.959 | 15467661.17 |
| M201T263   | 201.0862154 | 262.529 | 27651239.12 |
| M201T102   | 201.0865479 | 102.247 | 11237605.9  |
| M201T232   | 201.0861608 | 231.773 | 7378053.353 |
| M201T188   | 201.0864856 | 188.126 | 5734599.844 |
| M201T413   | 201.1017355 | 413.295 | 79924732.69 |
| M201T197_2 | 201.1058478 | 196.644 | 13568092.18 |
| M201T214   | 201.1057818 | 213.872 | 35282333.13 |
| M201T426   | 201.1016883 | 425.909 | 12114458.99 |
| M201T474   | 201.1104561 | 473.597 | 4169268.354 |



|            |              |          |              |
|------------|--------------|----------|--------------|
| M201T499   | 201. 1105937 | 498. 645 | 2375735. 056 |
| M201T211   | 201. 1225057 | 211. 288 | 3904601. 686 |
| M201T566   | 201. 1266756 | 565. 79  | 17509744. 44 |
| M201T804   | 201. 124816  | 804. 327 | 1098637. 03  |
| M201T636   | 201. 1267506 | 636. 473 | 5421068. 682 |
| M201T371   | 201. 1227083 | 370. 777 | 17284137. 87 |
| M201T525   | 201. 1273045 | 525. 132 | 6800291. 026 |
| M201T106   | 201. 1308383 | 105. 503 | 17565173. 87 |
| M201T301   | 201. 134323  | 300. 782 | 3579303. 941 |
| M201T343   | 201. 1465402 | 343. 226 | 7291149. 737 |
| M201T652   | 201. 1479524 | 651. 956 | 1393379. 8   |
| M201T438   | 201. 1470069 | 437. 571 | 9870250. 162 |
| M201T785   | 201. 1631818 | 785. 136 | 13695877. 65 |
| M201T669   | 201. 1619587 | 668. 867 | 23149699. 68 |
| M201T649   | 201. 1642529 | 649. 338 | 18333561. 86 |
| M201T702   | 201. 1642848 | 702. 055 | 30590144. 46 |
| M201T562   | 201. 1643408 | 561. 955 | 78875829. 21 |
| M201T751   | 201. 1632766 | 751. 333 | 15092726. 02 |
| M201T740   | 201. 1634057 | 740. 014 | 15900350. 98 |
| M201T545   | 201. 1633164 | 545. 203 | 32737145. 94 |
| M201T576   | 201. 1635328 | 575. 878 | 13909956. 55 |
| M201T353   | 201. 1703796 | 352. 65  | 1371536. 07  |
| M202T446   | 201. 5336577 | 445. 984 | 2049789. 167 |
| M202T78    | 201. 6205429 | 78. 3841 | 5495085. 706 |
| M202T75    | 201. 9738932 | 74. 9588 | 24075476. 26 |
| M202T49    | 201. 9739803 | 48. 7362 | 4921391. 481 |
| M202T62    | 201. 9741085 | 62. 1777 | 8114895. 24  |
| M202T35    | 201. 9748588 | 34. 5397 | 13201869. 29 |
| M202T38    | 201. 9914191 | 38. 3208 | 5839799. 507 |
| M202T61    | 201. 9917189 | 61. 1538 | 5879660. 17  |
| M202T131   | 202. 0017024 | 130. 668 | 5631137. 42  |
| M202T41    | 202. 0133472 | 40. 6031 | 8445144. 433 |
| M202T65    | 202. 0127658 | 64. 6213 | 2057005. 603 |
| M202T443   | 202. 0129617 | 443. 256 | 10980599. 91 |
| M202T147   | 202. 0285412 | 146. 742 | 3160687. 863 |
| M202T402   | 202. 0454443 | 401. 963 | 439260349. 3 |
| M202T426   | 202. 0673739 | 425. 909 | 1388921. 476 |
| M202T181   | 202. 0701823 | 181. 154 | 14305103. 84 |
| M202T291   | 202. 0701006 | 291. 307 | 32970067. 97 |
| M202T95    | 202. 0700979 | 94. 7467 | 152877141. 1 |
| M202T374   | 202. 0707703 | 373. 532 | 11131699. 66 |
| M202T695   | 202. 0693462 | 695. 155 | 3195086. 665 |
| M202T320   | 202. 0701651 | 319. 758 | 31708991. 95 |
| M202T341   | 202. 0701528 | 340. 548 | 10224196. 28 |
| M202T254_1 | 202. 0701133 | 254. 446 | 63240840. 32 |
| M202T143_1 | 202. 0807171 | 142. 85  | 52928080. 35 |
| M202T110   | 202. 0817015 | 110. 047 | 25624531. 74 |
| M202T263   | 202. 0895031 | 262. 529 | 1182768. 846 |
| M202T639   | 202. 0857267 | 639. 219 | 13808164. 57 |
| M202T458   | 202. 0856835 | 457. 576 | 5021308. 21  |
| M202T413   | 202. 1056427 | 413. 295 | 13081747. 74 |
| M202T308_1 | 202. 1067581 | 307. 735 | 8467199. 763 |
| M202T144   | 202. 1068201 | 143. 959 | 21276853. 4  |
| M202T335   | 202. 1074536 | 334. 966 | 12786245. 82 |

|            |              |          |              |
|------------|--------------|----------|--------------|
| M202T103   | 202. 1069164 | 103. 423 | 68868068. 53 |
| M202T93    | 202. 1069025 | 92. 7272 | 33903836. 69 |
| M202T359   | 202. 1067525 | 359. 32  | 6869456. 733 |
| M202T198   | 202. 1067957 | 198. 072 | 9512806. 524 |
| M202T376   | 202. 1070011 | 376. 409 | 11267002. 96 |
| M202T327   | 202. 1069003 | 326. 78  | 11236861. 17 |
| M202T294   | 202. 1178139 | 293. 896 | 7702898. 703 |
| M202T260   | 202. 1178227 | 259. 74  | 34518606. 15 |
| M202T284   | 202. 1178309 | 284. 377 | 10696420. 78 |
| M202T308_2 | 202. 1194621 | 307. 735 | 21648252. 8  |
| M202T355   | 202. 1171717 | 355. 41  | 67294262. 94 |
| M202T290   | 202. 142961  | 289. 912 | 14526670. 18 |
| M202T574   | 202. 142996  | 574. 363 | 8651780. 549 |
| M202T143_2 | 202. 1430215 | 142. 85  | 18117396. 79 |
| M202T331   | 202. 1430571 | 330. 809 | 19600406. 17 |
| M202T384   | 202. 1430559 | 383. 536 | 2292752. 547 |
| M202T254_2 | 202. 143061  | 254. 446 | 8083941. 784 |
| M202T107   | 202. 1429936 | 106. 513 | 23768114. 3  |
| M202T562   | 202. 1664521 | 561. 955 | 10831689. 52 |
| M202T190   | 202. 1790862 | 189. 571 | 273659553. 3 |
| M202T175   | 202. 179179  | 174. 865 | 266119326. 8 |
| M203T37_1  | 202. 5083916 | 37. 1891 | 3176666. 925 |
| M203T445   | 202. 5143148 | 444. 725 | 789137. 2114 |
| M203T139   | 202. 546418  | 138. 766 | 6785057. 314 |
| M203T154   | 202. 5462491 | 153. 785 | 14384689. 21 |
| M203T278_1 | 202. 5463274 | 277. 699 | 44724823. 16 |
| M203T378   | 202. 6049449 | 377. 704 | 9256300. 739 |
| M203T62    | 202. 9504813 | 62. 1777 | 2674082. 117 |
| M203T38    | 202. 9505301 | 38. 3208 | 909247. 1205 |
| M203T68    | 202. 9505853 | 68. 0903 | 1497507. 178 |
| M203T44    | 202. 950395  | 44. 1485 | 3010376. 24  |
| M203T56    | 202. 9505091 | 56. 1096 | 2099119. 728 |
| M203T75    | 202. 9695752 | 74. 9588 | 42273423. 26 |
| M203T37_2  | 202. 9866207 | 37. 1891 | 8226001. 461 |
| M203T49    | 202. 9866882 | 48. 7362 | 3707693. 067 |
| M203T211   | 202. 9856368 | 211. 288 | 6403872. 607 |
| M203T69    | 202. 9962269 | 69. 2834 | 3535139. 74  |
| M203T122   | 203. 0031791 | 122. 007 | 6312293. 327 |
| M203T113_1 | 203. 0032277 | 112. 781 | 4063982. 168 |
| M203T278_2 | 203. 0493758 | 277. 699 | 10905551. 64 |
| M203T403   | 203. 0467578 | 403. 447 | 44285604. 23 |
| M203T137   | 203. 0516605 | 137. 373 | 13468448. 99 |
| M203T94    | 203. 0516541 | 93. 7378 | 246858965. 9 |
| M203T357   | 203. 0551994 | 356. 74  | 2795387. 135 |
| M203T113_2 | 203. 0516385 | 112. 781 | 25581624. 85 |
| M203T104_1 | 203. 0654372 | 104. 493 | 6889435. 781 |
| M203T254   | 203. 0735394 | 254. 446 | 4076393. 137 |
| M203T438   | 203. 0810887 | 437. 571 | 3154654. 681 |
| M203T305   | 203. 0810441 | 304. 777 | 11684802. 88 |
| M203T413   | 203. 0907772 | 413. 295 | 4700355. 491 |
| M203T350   | 203. 0908979 | 349. 911 | 3889202. 454 |
| M203T86    | 203. 1017899 | 85. 6453 | 12374027. 05 |
| M203T288   | 203. 1018293 | 288. 481 | 2408899. 482 |
| M203T93    | 203. 101642  | 92. 7272 | 23400805. 37 |

|            |              |          |              |
|------------|--------------|----------|--------------|
| M203T381   | 203. 1066097 | 380. 63  | 650630. 4726 |
| M203T345   | 203. 1174677 | 344. 555 | 6205259. 775 |
| M203T361   | 203. 1175737 | 360. 794 | 83137259. 62 |
| M203T198   | 203. 1103233 | 198. 072 | 465238. 6742 |
| M203T118   | 203. 1119171 | 118. 116 | 28466903. 69 |
| M203T104_2 | 203. 1118366 | 104. 493 | 279518256. 2 |
| M203T461_1 | 203. 1280305 | 460. 537 | 3484342. 335 |
| M203T487   | 203. 1281576 | 486. 885 | 17328307. 07 |
| M203T369   | 203. 138244  | 369. 321 | 106601265. 2 |
| M203T353   | 203. 1382426 | 352. 65  | 28336900. 27 |
| M203T195   | 203. 138382  | 195. 23  | 8357843. 286 |
| M203T304   | 203. 1382221 | 303. 513 | 33131903. 4  |
| M203T562_1 | 203. 1424332 | 561. 955 | 7554265. 46  |
| M203T633   | 203. 142364  | 633. 476 | 6035449. 594 |
| M203T202   | 203. 1492425 | 202. 149 | 5192423. 642 |
| M203T791   | 203. 1804501 | 790. 802 | 92431103. 61 |
| M203T836   | 203. 1787063 | 836. 034 | 18499752. 48 |
| M203T190   | 203. 1827645 | 189. 571 | 29357889. 14 |
| M203T669   | 203. 1805737 | 668. 867 | 239032054. 7 |
| M203T649   | 203. 1807078 | 649. 338 | 292741517    |
| M203T682   | 203. 1805701 | 681. 885 | 168858468. 4 |
| M203T524   | 203. 1806389 | 523. 735 | 16044065. 95 |
| M203T461_2 | 203. 1793059 | 460. 537 | 5559625. 42  |
| M203T702   | 203. 18066   | 702. 055 | 641069777. 2 |
| M203T811   | 203. 1806847 | 811. 413 | 31741992. 75 |
| M203T562_2 | 203. 1787888 | 561. 955 | 1802442931   |
| M203T620   | 203. 1787286 | 620. 172 | 33670181. 68 |
| M203T758   | 203. 1787207 | 758. 236 | 99546799. 83 |
| M203T515   | 203. 1796934 | 514. 727 | 9505718. 924 |
| M203T607   | 203. 1806027 | 606. 774 | 51428348. 52 |
| M203T740   | 203. 1805305 | 740. 014 | 114329973. 1 |
| M203T588   | 203. 180574  | 587. 521 | 52958278. 07 |
| M203T827   | 203. 1801119 | 827. 271 | 34564519. 55 |
| M203T545   | 203. 1805026 | 545. 203 | 428917261. 5 |
| M203T632   | 203. 1805106 | 631. 982 | 52089461. 54 |
| M203T595   | 203. 1805294 | 595. 066 | 37297699. 95 |
| M203T176   | 203. 1827923 | 175. 952 | 31413399. 04 |
| M203T576   | 203. 1805398 | 575. 878 | 122408238. 2 |
| M203T802   | 203. 1807026 | 801. 685 | 55673669. 64 |
| M203T772   | 203. 1807367 | 772. 206 | 113535414. 5 |
| M204T35_1  | 203. 970606  | 34. 5397 | 5107613. 938 |
| M204T35_2  | 204. 0243002 | 34. 5397 | 6705065. 308 |
| M204T236   | 204. 0494718 | 235. 734 | 21472386. 45 |
| M204T218   | 204. 0603404 | 217. 866 | 1464818. 447 |
| M204T641   | 204. 0648024 | 640. 717 | 2460571. 541 |
| M204T398   | 204. 0647788 | 397. 878 | 3626651. 564 |
| M204T323_1 | 204. 0648401 | 322. 536 | 10959084. 26 |
| M204T331_1 | 204. 0647174 | 330. 809 | 13163582. 23 |
| M204T566   | 204. 0848999 | 565. 79  | 13079930. 62 |
| M204T537   | 204. 0849389 | 536. 761 | 13669135. 06 |
| M204T420   | 204. 0848498 | 420. 274 | 16064937. 02 |
| M204T813   | 204. 0849576 | 812. 862 | 17181880. 94 |
| M204T129   | 204. 0849506 | 129. 234 | 91846252. 97 |
| M204T739   | 204. 0848194 | 738. 697 | 10189457. 77 |

|            |              |          |              |
|------------|--------------|----------|--------------|
| M204T503   | 204. 0848827 | 503. 046 | 12622938. 26 |
| M204T577   | 204. 084901  | 577. 366 | 17572199. 61 |
| M204T731   | 204. 0848894 | 731. 347 | 15645041. 11 |
| M204T446   | 204. 0848151 | 445. 984 | 13289652. 37 |
| M204T834   | 204. 0849325 | 834. 486 | 12578973. 14 |
| M204T455   | 204. 0848351 | 454. 739 | 15879015. 42 |
| M204T239   | 204. 0849577 | 238. 605 | 45782169. 98 |
| M204T718   | 204. 0848845 | 717. 959 | 27235468. 85 |
| M204T762   | 204. 084792  | 762. 439 | 12455436. 59 |
| M204T512   | 204. 0848978 | 511. 77  | 15980508. 22 |
| M204T586   | 204. 0849776 | 585. 968 | 10879580. 2  |
| M204T632   | 204. 0849377 | 631. 982 | 22961146. 04 |
| M204T358   | 204. 084819  | 357. 958 | 23720117. 02 |
| M204T384   | 204. 0847887 | 383. 536 | 31086027. 47 |
| M204T595   | 204. 0849379 | 595. 066 | 14683198. 84 |
| M204T772_1 | 204. 0849456 | 772. 206 | 20593849. 28 |
| M204T802   | 204. 0848815 | 801. 685 | 16073003. 95 |
| M204T781   | 204. 0849033 | 781. 303 | 12928836. 95 |
| M204T792   | 204. 0849103 | 792. 146 | 20752753     |
| M204T101   | 204. 0860577 | 101. 161 | 422981977. 6 |
| M204T107   | 204. 0860668 | 106. 513 | 177921541. 6 |
| M204T746   | 204. 0880328 | 745. 603 | 11949905. 92 |
| M204T372   | 204. 0861075 | 372. 152 | 30119839. 76 |
| M204T309   | 204. 0880128 | 308. 967 | 62328711. 64 |
| M204T557   | 204. 0879243 | 556. 816 | 10306744. 23 |
| M204T119   | 204. 0860676 | 119. 433 | 135278136. 7 |
| M204T163   | 204. 0861103 | 162. 728 | 157096591. 4 |
| M204T229   | 204. 0860819 | 229. 059 | 61229879. 77 |
| M204T436   | 204. 0879555 | 436. 069 | 15527342. 15 |
| M204T190_1 | 204. 0860651 | 189. 571 | 78520170. 76 |
| M204T605   | 204. 0877945 | 605. 264 | 19188521. 53 |
| M204T293   | 204. 0861141 | 292. 623 | 117054261. 9 |
| M204T649_1 | 204. 086085  | 649. 338 | 89273375. 26 |
| M204T427   | 204. 0879622 | 427. 362 | 10521011. 28 |
| M204T199   | 204. 0860792 | 199. 43  | 64573122. 36 |
| M204T350   | 204. 0880022 | 349. 911 | 13209404. 52 |
| M204T94    | 204. 0860622 | 93. 7378 | 496642950. 8 |
| M204T143   | 204. 0861057 | 142. 85  | 122352217    |
| M204T323_2 | 204. 0861026 | 322. 536 | 36875184. 95 |
| M204T620   | 204. 0877728 | 620. 172 | 24292646. 77 |
| M204T258   | 204. 0860877 | 258. 489 | 113140842. 1 |
| M204T210   | 204. 0878254 | 210. 186 | 49229169. 92 |
| M204T468   | 204. 0878661 | 467. 706 | 15418651. 34 |
| M204T703   | 204. 0861242 | 703. 35  | 32238119. 74 |
| M204T545_1 | 204. 0876    | 545. 203 | 21900286     |
| M204T341   | 204. 0881214 | 340. 548 | 31577833. 72 |
| M204T674   | 204. 0878734 | 674. 402 | 32639935. 93 |
| M204T521   | 204. 0879801 | 520. 739 | 11670395. 71 |
| M204T89    | 204. 0969797 | 88. 6838 | 20447422. 68 |
| M204T490   | 204. 0880423 | 489. 826 | 17112729. 67 |
| M204T406_1 | 204. 0860481 | 406. 289 | 28521367. 8  |
| M204T178   | 204. 0861162 | 178. 408 | 72490060. 66 |
| M204T823   | 204. 0878003 | 822. 881 | 21503489. 79 |
| M204T480_1 | 204. 0879658 | 479. 527 | 13516182. 98 |

|            |              |          |              |
|------------|--------------|----------|--------------|
| M204T751   | 204. 1010361 | 751. 333 | 4373546. 929 |
| M204T318   | 204. 1047826 | 318. 497 | 1151446. 518 |
| M204T301   | 204. 1021153 | 300. 782 | 3030301. 713 |
| M204T422   | 204. 1130879 | 421. 784 | 2699104. 441 |
| M204T406_2 | 204. 1131161 | 406. 289 | 2398161. 601 |
| M204T147   | 204. 1220447 | 146. 742 | 15017047. 98 |
| M204T203_1 | 204. 1225404 | 203. 36  | 5965512. 663 |
| M204T516   | 204. 1221873 | 516. 214 | 13647276. 96 |
| M204T252   | 204. 1222348 | 251. 555 | 9721718. 921 |
| M204T509   | 204. 1221131 | 508. 883 | 7222772. 986 |
| M204T302   | 204. 1222144 | 302. 191 | 10137220. 65 |
| M204T110   | 204. 1220037 | 110. 047 | 45221359. 49 |
| M204T361   | 204. 1205364 | 360. 794 | 9792549. 56  |
| M204T317   | 204. 1221616 | 317. 199 | 12842210. 37 |
| M204T331_2 | 204. 1227938 | 330. 809 | 12686579. 01 |
| M204T203_2 | 204. 1338056 | 203. 36  | 64624426. 52 |
| M204T223   | 204. 1337852 | 223. 474 | 40248639. 54 |
| M204T294   | 204. 1332658 | 293. 896 | 17581223. 5  |
| M204T190_2 | 204. 1337394 | 189. 571 | 39796299. 35 |
| M204T245   | 204. 133735  | 245. 199 | 5299912. 458 |
| M204T237   | 204. 1337812 | 237. 171 | 4392371. 916 |
| M204T480_2 | 204. 137311  | 479. 527 | 1428354. 668 |
| M204T791   | 204. 1819507 | 790. 802 | 14340376. 97 |
| M204T649_2 | 204. 1818809 | 649. 338 | 45870221. 39 |
| M204T682   | 204. 1818309 | 681. 885 | 25885754. 88 |
| M204T702   | 204. 1818802 | 702. 055 | 100356187. 3 |
| M204T562   | 204. 1822527 | 561. 955 | 288837645. 7 |
| M204T607   | 204. 1810569 | 606. 774 | 11188839. 75 |
| M204T740   | 204. 1818468 | 740. 014 | 17338044. 91 |
| M204T576   | 204. 1821604 | 575. 878 | 18594481. 42 |
| M204T772_2 | 204. 1818554 | 772. 206 | 16560305. 2  |
| M204T669   | 204. 1838352 | 668. 867 | 38504005. 61 |
| M204T545_2 | 204. 1833743 | 545. 203 | 67687474. 24 |
| M205T680_1 | 204. 6062141 | 680. 402 | 18639193. 01 |
| M205T695   | 204. 6063177 | 695. 155 | 1285314. 854 |
| M205T41_1  | 204. 9661194 | 40. 6031 | 20802041. 18 |
| M205T66_1  | 204. 9661038 | 65. 7101 | 15221115. 26 |
| M205T210   | 205. 0187076 | 210. 186 | 3480962. 587 |
| M205T147   | 205. 0278518 | 146. 742 | 7289819. 772 |
| M205T36    | 205. 0441113 | 35. 8675 | 7250803. 675 |
| M205T604   | 205. 0494913 | 603. 95  | 7947347. 879 |
| M205T291   | 205. 0489785 | 291. 307 | 3957890. 078 |
| M205T510   | 205. 048228  | 510. 333 | 20820505. 93 |
| M205T455   | 205. 0466283 | 454. 739 | 2393877. 239 |
| M205T91    | 205. 067447  | 90. 7088 | 49519627. 94 |
| M205T163   | 205. 0696182 | 162. 728 | 66810460. 8  |
| M205T666   | 205. 069874  | 666. 137 | 21939515. 07 |
| M205T506   | 205. 0708054 | 505. 855 | 6678776. 61  |
| M205T121_1 | 205. 0711147 | 120. 525 | 30054896. 44 |
| M205T249   | 205. 0696916 | 248. 895 | 40794120. 64 |
| M205T685   | 205. 0708304 | 684. 985 | 49773712. 45 |
| M205T313   | 205. 0693377 | 312. 85  | 82638064. 21 |
| M205T107   | 205. 0699083 | 106. 513 | 43369699. 23 |
| M205T101   | 205. 08097   | 101. 161 | 85601357. 77 |

|            |             |         |             |
|------------|-------------|---------|-------------|
| M205T95    | 205.0810353 | 94.7467 | 71740867.05 |
| M205T372   | 205.089056  | 372.152 | 1738329.098 |
| M205T158   | 205.0880358 | 157.773 | 8127484.591 |
| M205T293   | 205.0891544 | 292.623 | 10554293.81 |
| M205T649_1 | 205.0887451 | 649.338 | 7187844.702 |
| M205T310   | 205.0892048 | 310.075 | 6412563.029 |
| M205T554   | 205.0885542 | 553.936 | 1650809.452 |
| M205T143   | 205.0880397 | 142.85  | 8085857.377 |
| M205T121_2 | 205.0893928 | 120.525 | 7528054.139 |
| M205T41_2  | 205.0852018 | 40.6031 | 3568448.262 |
| M205T32    | 205.0855055 | 32.4171 | 690337.9798 |
| M205T458   | 205.0854403 | 457.576 | 3673452.803 |
| M205T52    | 205.085245  | 52.4521 | 3635705.573 |
| M205T66_2  | 205.0852427 | 65.7101 | 4257193.667 |
| M205T499   | 205.0967392 | 498.645 | 2330057.561 |
| M205T401   | 205.0960029 | 400.59  | 1004662579  |
| M205T427   | 205.0967965 | 427.362 | 62758459.33 |
| M205T357   | 205.0965499 | 356.74  | 9052071.127 |
| M205T509   | 205.0966263 | 508.883 | 3211350.345 |
| M205T780   | 205.0963697 | 780.043 | 18807307.06 |
| M205T386   | 205.0964885 | 386.352 | 4139541.656 |
| M205T202   | 205.1178694 | 202.149 | 17864008.61 |
| M205T100   | 205.1178673 | 100.146 | 91495896.66 |
| M205T38    | 205.1217098 | 38.3208 | 5923173.064 |
| M205T435   | 205.1217034 | 434.589 | 814238.0514 |
| M205T63    | 205.1217996 | 63.4448 | 3056526.48  |
| M205T773   | 205.1217224 | 773.437 | 4066569.139 |
| M205T350   | 205.1332461 | 349.911 | 6101669.145 |
| M205T381   | 205.1328311 | 380.63  | 3647079.961 |
| M205T203   | 205.1370139 | 203.36  | 3666538.745 |
| M205T588   | 205.157469  | 587.521 | 7547782.017 |
| M205T605   | 205.1582737 | 605.264 | 5700674.475 |
| M205T669   | 205.1583045 | 668.867 | 25315324.25 |
| M205T682   | 205.1581527 | 681.885 | 16731640.57 |
| M205T562_1 | 205.1583759 | 561.955 | 177008977.3 |
| M205T545   | 205.1583505 | 545.203 | 48879205.14 |
| M205T694   | 205.1586553 | 693.81  | 19773928.66 |
| M205T576   | 205.1582422 | 575.878 | 8937053.953 |
| M205T746   | 205.1943135 | 745.603 | 7334063.352 |
| M205T680_2 | 205.1946595 | 680.402 | 15387726.15 |
| M205T649_2 | 205.1947476 | 649.338 | 34293370.1  |
| M205T795   | 205.1945733 | 795.165 | 13160569.36 |
| M205T562_2 | 205.1944721 | 561.955 | 27098707.97 |
| M205T719   | 205.1945577 | 719.215 | 8356094.406 |
| M205T703   | 205.1948052 | 703.35  | 31766351.78 |
| M205T737   | 205.194776  | 737.198 | 7175877.256 |
| M205T768   | 205.1945295 | 768.166 | 102981281.3 |
| M206T503   | 205.5860867 | 503.046 | 696525.1817 |
| M206T708_1 | 205.6133372 | 707.557 | 86432207.14 |
| M206T147   | 206.0253161 | 146.742 | 5317529.773 |
| M206T159   | 206.0253403 | 159.017 | 5075347.707 |
| M206T32    | 206.0215084 | 32.4171 | 1176650.834 |
| M206T369   | 206.0437765 | 369.321 | 22194809.2  |
| M206T143   | 206.04711   | 142.85  | 57062124.5  |

|            |              |          |              |
|------------|--------------|----------|--------------|
| M206T323   | 206. 0438797 | 322. 536 | 8202368. 803 |
| M206T119   | 206. 0651289 | 119. 433 | 21141919. 37 |
| M206T165   | 206. 0650484 | 165. 217 | 11582798. 59 |
| M206T257   | 206. 0650832 | 257. 155 | 10101002. 39 |
| M206T148   | 206. 0651452 | 148. 117 | 10138222. 15 |
| M206T96    | 206. 065636  | 95. 7572 | 40862954. 01 |
| M206T215   | 206. 0654217 | 215. 068 | 6672699. 851 |
| M206T328   | 206. 0801771 | 328. 106 | 7202104. 159 |
| M206T388   | 206. 0800713 | 387. 763 | 12421987. 95 |
| M206T346   | 206. 080095  | 345. 848 | 9658673. 31  |
| M206T362   | 206. 080101  | 362. 146 | 45756638. 14 |
| M206T101   | 206. 0846288 | 101. 161 | 3482813. 945 |
| M206T518   | 206. 0810398 | 517. 762 | 14839821. 7  |
| M206T223_1 | 206. 0839422 | 223. 474 | 3172243. 259 |
| M206T496   | 206. 0805962 | 495. 779 | 7244923. 775 |
| M206T475   | 206. 0806767 | 475. 007 | 10308417. 86 |
| M206T306   | 206. 0820716 | 306. 247 | 38360760. 86 |
| M206T398   | 206. 0804452 | 397. 878 | 9134224. 324 |
| M206T461_1 | 206. 0810574 | 460. 537 | 20537633. 74 |
| M206T415   | 206. 0811133 | 414. 82  | 92810681. 6  |
| M206T607   | 206. 0803761 | 606. 774 | 15968294. 42 |
| M206T549   | 206. 0803275 | 549. 375 | 5293686. 23  |
| M206T308   | 206. 0928678 | 307. 735 | 10051928. 03 |
| M206T144   | 206. 1020908 | 143. 959 | 27002169. 29 |
| M206T102   | 206. 1014165 | 102. 247 | 41114743. 12 |
| M206T86    | 206. 1021094 | 85. 6453 | 72226393. 93 |
| M206T252   | 206. 1014581 | 251. 555 | 16260873. 27 |
| M206T401   | 206. 0986326 | 400. 59  | 112901591. 8 |
| M206T94    | 206. 1014363 | 93. 7378 | 53905375. 5  |
| M206T172   | 206. 1015444 | 171. 935 | 26330384. 17 |
| M206T223_2 | 206. 1127554 | 223. 474 | 6578557. 804 |
| M206T708_2 | 206. 1154785 | 707. 557 | 17314986. 9  |
| M206T461_2 | 206. 1168527 | 460. 537 | 8447822. 661 |
| M206T232   | 206. 1126389 | 231. 773 | 4678163. 975 |
| M206T240   | 206. 1126629 | 239. 913 | 2079798. 945 |
| M206T365   | 206. 1169244 | 365. 061 | 33297810. 3  |
| M206T211   | 206. 1128101 | 211. 288 | 4484793. 652 |
| M206T202   | 206. 1209061 | 202. 149 | 660105. 7349 |
| M206T310   | 206. 1208237 | 310. 075 | 1160285. 652 |
| M206T419   | 206. 1284935 | 418. 97  | 2238394. 796 |
| M206T314   | 206. 1493313 | 314. 259 | 4686017. 087 |
| M206T562   | 206. 1612259 | 561. 955 | 28396300     |
| M206T649   | 206. 197572  | 649. 338 | 4481933. 199 |
| M206T703   | 206. 1980097 | 703. 35  | 4253476. 011 |
| M207T443   | 206. 5494651 | 443. 256 | 1537741. 482 |
| M207T171_1 | 206. 5541135 | 170. 665 | 20338342. 46 |
| M207T461   | 206. 5879595 | 460. 537 | 2639633. 576 |
| M207T187   | 206. 6180026 | 186. 709 | 33361273. 29 |
| M207T708   | 206. 6171607 | 707. 557 | 1053765. 886 |
| M207T108   | 206. 6180015 | 107. 537 | 54068209. 11 |
| M207T279   | 206. 6180591 | 279. 039 | 14952199. 9  |
| M207T298   | 206. 6151264 | 298. 135 | 4308263. 66  |
| M207T314   | 206. 6207947 | 314. 259 | 4415655. 92  |
| M207T82    | 206. 8834487 | 82. 0569 | 377334678. 2 |

|            |             |         |             |
|------------|-------------|---------|-------------|
| M207T41    | 206.9878139 | 40.6031 | 1291477.169 |
| M207T210   | 207.0072461 | 210.186 | 2562766.846 |
| M207T785   | 207.0171583 | 785.136 | 22661913.12 |
| M207T33    | 207.0170612 | 33.467  | 6527656.994 |
| M207T792   | 207.0165054 | 792.146 | 14314450.33 |
| M207T803   | 207.0171491 | 802.88  | 14301548.27 |
| M207T821   | 207.0184711 | 821.334 | 22798561.94 |
| M207T243   | 207.0437921 | 242.682 | 3339064.335 |
| M207T329   | 207.0496271 | 329.481 | 12311835.63 |
| M207T171_2 | 207.0561137 | 170.665 | 2419008.734 |
| M207T89    | 207.0602715 | 88.6838 | 59760494.4  |
| M207T480   | 207.0624404 | 479.527 | 7043649.554 |
| M207T293   | 207.0641457 | 292.623 | 5581510.23  |
| M207T420   | 207.0653049 | 420.274 | 8601338.449 |
| M207T682_1 | 207.0645022 | 681.885 | 19056741.68 |
| M207T471   | 207.0652391 | 470.602 | 7121164.201 |
| M207T543   | 207.064558  | 542.766 | 15318331.05 |
| M207T586   | 207.0642498 | 585.968 | 13022876.6  |
| M207T364   | 207.0646833 | 363.58  | 11820537.2  |
| M207T382   | 207.0758552 | 382.125 | 1359309.011 |
| M207T252   | 207.0791777 | 251.555 | 2548668.517 |
| M207T203_1 | 207.085408  | 203.36  | 5101804.57  |
| M207T415   | 207.0859599 | 414.82  | 5800413.153 |
| M207T744   | 207.0900223 | 744.182 | 9956527.356 |
| M207T148   | 207.0858202 | 148.117 | 4510971.522 |
| M207T662   | 207.1007924 | 661.979 | 8004186.137 |
| M207T617   | 207.1008916 | 617.133 | 124912538.1 |
| M207T401   | 207.1022791 | 400.59  | 5765598.863 |
| M207T521_1 | 207.1014127 | 520.739 | 7856953.882 |
| M207T395   | 207.1126089 | 395.264 | 9157527.289 |
| M207T309   | 207.1104419 | 308.967 | 7596519.94  |
| M207T230   | 207.1118723 | 230.321 | 25535575.85 |
| M207T102   | 207.1120067 | 102.247 | 19313618.82 |
| M207T345   | 207.1140894 | 344.555 | 14255167.1  |
| M207T323   | 207.1128454 | 322.536 | 14344004.05 |
| M207T371   | 207.1128906 | 370.777 | 39503693.91 |
| M207T402   | 207.1140024 | 401.963 | 7215216.845 |
| M207T188   | 207.1198431 | 188.126 | 5692218.361 |
| M207T353   | 207.1256103 | 352.65  | 7435434.161 |
| M207T38    | 207.1372743 | 38.3208 | 17827036.62 |
| M207T582   | 207.1374062 | 581.625 | 4893276.963 |
| M207T159   | 207.1336968 | 159.017 | 13537050.78 |
| M207T203_2 | 207.1334667 | 203.36  | 2595770.478 |
| M207T680   | 207.1373146 | 680.402 | 10016944.13 |
| M207T765   | 207.1373352 | 765.406 | 11744276.24 |
| M207T63    | 207.1373406 | 63.4448 | 9630058.22  |
| M207T568   | 207.1373789 | 568.464 | 2974132.683 |
| M207T753   | 207.1372794 | 752.541 | 11479465.28 |
| M207T595   | 207.1373066 | 595.066 | 3045415.639 |
| M207T462   | 207.1382478 | 461.845 | 20763421.31 |
| M207T521_2 | 207.1381283 | 520.739 | 9952236.926 |
| M207T669   | 207.174057  | 668.867 | 90640968.32 |
| M207T649   | 207.173868  | 649.338 | 178601472.4 |
| M207T682_2 | 207.1740535 | 681.885 | 58612374.45 |



|            |              |          |              |
|------------|--------------|----------|--------------|
| M207T562   | 207. 1730601 | 561. 955 | 652182799. 9 |
| M207T719   | 207. 1740338 | 719. 215 | 43587144. 05 |
| M207T607   | 207. 1739424 | 606. 774 | 16729398. 1  |
| M207T703   | 207. 1740577 | 703. 35  | 179254886. 4 |
| M207T545   | 207. 1740971 | 545. 203 | 138828880. 3 |
| M207T632   | 207. 1739623 | 631. 982 | 24010472. 93 |
| M207T800   | 207. 1736724 | 800. 484 | 8778662. 169 |
| M207T694   | 207. 1740614 | 693. 81  | 79866566. 42 |
| M207T576   | 207. 1739958 | 575. 878 | 30954238. 76 |
| M207T772   | 207. 1738858 | 772. 206 | 11204013. 43 |
| M208T359   | 207. 5380983 | 359. 32  | 1106144. 817 |
| M208T435   | 207. 5933557 | 434. 589 | 1595353. 898 |
| M208T82    | 207. 8885109 | 82. 0569 | 11469099. 17 |
| M208T211_1 | 207. 9658722 | 211. 288 | 2012821. 91  |
| M208T69    | 207. 9846593 | 69. 2834 | 2417489. 139 |
| M208T60    | 208. 0279495 | 59. 9075 | 3127319. 283 |
| M208T54    | 208. 0279636 | 53. 6731 | 2632037. 982 |
| M208T39    | 208. 0279564 | 39. 4128 | 1505164. 032 |
| M208T809   | 208. 0406202 | 808. 678 | 15180255. 02 |
| M208T794   | 208. 0380351 | 793. 649 | 23194188. 56 |
| M208T558_1 | 208. 0386021 | 557. 967 | 19640909. 72 |
| M208T669   | 208. 037978  | 668. 867 | 72665994. 16 |
| M208T74    | 208. 0394466 | 73. 8324 | 8213378. 416 |
| M208T682   | 208. 0379675 | 681. 885 | 74229083. 39 |
| M208T538   | 208. 038597  | 538. 316 | 34699028. 99 |
| M208T446   | 208. 0386445 | 445. 984 | 50604295. 04 |
| M208T628   | 208. 0407268 | 627. 58  | 178708586. 4 |
| M208T731   | 208. 0378798 | 731. 347 | 208653740. 4 |
| M208T549   | 208. 038601  | 549. 375 | 29301641. 84 |
| M208T694_1 | 208. 0379724 | 693. 81  | 98174698. 38 |
| M208T761   | 208. 0379855 | 760. 916 | 117877932. 7 |
| M208T583   | 208. 0379271 | 583. 068 | 66025439. 71 |
| M208T35    | 208. 0386064 | 34. 5397 | 36020407. 8  |
| M208T386   | 208. 0386605 | 386. 352 | 19094054. 85 |
| M208T439   | 208. 0599542 | 439. 021 | 9957950. 673 |
| M208T416   | 208. 0597897 | 416. 239 | 3718647. 08  |
| M208T294   | 208. 0596848 | 293. 896 | 9695353. 617 |
| M208T469   | 208. 0596657 | 469. 252 | 3404401. 091 |
| M208T143   | 208. 0596219 | 142. 85  | 19121522. 1  |
| M208T163   | 208. 0629233 | 162. 728 | 61999653. 13 |
| M208T211_2 | 208. 0631794 | 211. 288 | 844381575    |
| M208T246   | 208. 0821298 | 246. 372 | 2407665. 234 |
| M208T93    | 208. 0806695 | 92. 7272 | 51317261. 18 |
| M208T558_2 | 208. 0962551 | 557. 967 | 14882835. 78 |
| M208T533   | 208. 0966548 | 532. 526 | 16405037. 8  |
| M208T295   | 208. 095924  | 295. 356 | 18826207. 39 |
| M208T365   | 208. 096536  | 365. 061 | 15157182. 78 |
| M208T699   | 208. 0955584 | 699. 389 | 12179144. 17 |
| M208T688   | 208. 0979127 | 687. 95  | 23934375. 07 |
| M208T777   | 208. 0990851 | 777. 245 | 228613204. 9 |
| M208T398   | 208. 1076153 | 397. 878 | 62464509. 23 |
| M208T415   | 208. 10759   | 414. 82  | 9234950. 126 |
| M208T210   | 208. 1073046 | 210. 186 | 6558155. 03  |
| M208T708   | 208. 1169599 | 707. 557 | 4433965. 042 |

|            |              |          |              |
|------------|--------------|----------|--------------|
| M208T90    | 208. 116843  | 89. 6999 | 117256525. 9 |
| M208T371   | 208. 1158951 | 370. 777 | 4918283. 287 |
| M208T802   | 208. 1324678 | 801. 685 | 5263214. 35  |
| M208T388   | 208. 154974  | 387. 763 | 46447434. 06 |
| M208T649   | 208. 177011  | 649. 338 | 23566102. 1  |
| M208T562   | 208. 1767877 | 561. 955 | 97925901. 72 |
| M208T703   | 208. 1767271 | 703. 35  | 25782288. 84 |
| M208T694_2 | 208. 1767945 | 693. 81  | 11591554. 64 |
| M209T82    | 208. 8824863 | 82. 0569 | 92489930. 49 |
| M209T121   | 208. 9963108 | 120. 525 | 5972199. 091 |
| M209T37    | 209. 0030834 | 37. 1891 | 6346647. 581 |
| M209T236   | 209. 004999  | 235. 734 | 3880572. 882 |
| M209T81    | 209. 0102233 | 80. 824  | 18230437. 72 |
| M209T39    | 209. 0272415 | 39. 4128 | 2819152. 798 |
| M209T176   | 209. 0225027 | 175. 952 | 4984551. 24  |
| M209T56    | 209. 0271914 | 56. 1096 | 2404285. 031 |
| M209T297   | 209. 0300471 | 296. 739 | 2188670. 357 |
| M209T440   | 209. 042713  | 440. 459 | 3108367. 046 |
| M209T490   | 209. 0430573 | 489. 826 | 5426696. 165 |
| M209T36    | 209. 0511643 | 35. 8675 | 2586824. 715 |
| M209T462   | 209. 0572752 | 461. 845 | 1102406. 59  |
| M209T730   | 209. 0514962 | 729. 798 | 1605412. 017 |
| M209T211   | 209. 066526  | 211. 288 | 62017825. 4  |
| M209T620   | 209. 0800792 | 620. 172 | 15134190. 25 |
| M209T652   | 209. 0801767 | 651. 956 | 10127436. 88 |
| M209T772   | 209. 0791435 | 772. 206 | 47106436. 05 |
| M209T419   | 209. 0802476 | 418. 97  | 7819435. 672 |
| M209T452_1 | 209. 0807117 | 451. 804 | 12574949. 43 |
| M209T591   | 209. 0803797 | 590. 607 | 9399253. 106 |
| M209T482   | 209. 0802732 | 482. 436 | 17237523. 97 |
| M209T528   | 209. 0806122 | 528. 185 | 17414030. 6  |
| M209T106_1 | 209. 0914892 | 105. 503 | 11230812. 51 |
| M209T267   | 209. 0912617 | 267. 171 | 12645424. 14 |
| M209T181   | 209. 0911453 | 181. 154 | 6263408. 718 |
| M209T323   | 209. 0913453 | 322. 536 | 24444227. 91 |
| M209T357   | 209. 0913964 | 356. 74  | 7272493. 604 |
| M209T342   | 209. 0919953 | 341. 802 | 6473157. 812 |
| M209T452_2 | 209. 0915985 | 451. 804 | 4233132. 689 |
| M209T398   | 209. 1106395 | 397. 878 | 6276432. 562 |
| M209T666   | 209. 116279  | 666. 137 | 4643050. 762 |
| M209T604   | 209. 1164135 | 603. 95  | 12006493. 11 |
| M209T777   | 209. 1151154 | 777. 245 | 9573260. 917 |
| M209T570   | 209. 1162431 | 570. 01  | 11116735. 92 |
| M209T90    | 209. 1206577 | 89. 6999 | 4847950. 851 |
| M209T106_2 | 209. 1277428 | 105. 503 | 17903423. 46 |
| M209T469   | 209. 127797  | 469. 252 | 7142094. 368 |
| M209T291   | 209. 127179  | 291. 307 | 2645998. 571 |
| M209T320   | 209. 1273688 | 319. 758 | 27151864. 33 |
| M209T549   | 209. 1278162 | 549. 375 | 7863758. 065 |
| M209T423   | 209. 1273814 | 423. 199 | 29127150. 78 |
| M209T334   | 209. 1390332 | 333. 715 | 3249408. 51  |
| M209T379   | 209. 1393042 | 379. 194 | 11277714. 35 |
| M209T318   | 209. 1392845 | 318. 497 | 3919238. 757 |
| M209T448   | 209. 14102   | 447. 531 | 9386840. 02  |

|            |              |          |              |
|------------|--------------|----------|--------------|
| M209T38    | 209. 1529073 | 38. 3208 | 21671212. 03 |
| M209T558   | 209. 1529551 | 557. 967 | 7673661. 127 |
| M209T830   | 209. 1529315 | 830. 193 | 40235232. 75 |
| M209T803   | 209. 1529415 | 802. 88  | 8730033. 171 |
| M209T388   | 209. 158669  | 387. 763 | 4132318. 362 |
| M209T409   | 209. 1644279 | 409. 271 | 2213001. 134 |
| M209T818   | 209. 1892438 | 818. 418 | 4057482. 426 |
| M210T39    | 210. 0241313 | 39. 4128 | 29346543. 15 |
| M210T63    | 210. 0229312 | 63. 4448 | 45122737. 22 |
| M210T136   | 210. 0233255 | 135. 971 | 25179242. 65 |
| M210T101   | 210. 0388423 | 101. 161 | 19816316. 34 |
| M210T164   | 210. 0602393 | 163. 846 | 1436455115   |
| M210T211   | 210. 0583652 | 211. 288 | 42616498. 41 |
| M210T106   | 210. 0753619 | 105. 503 | 29331927. 45 |
| M210T419   | 210. 0754518 | 418. 97  | 15179587. 29 |
| M210T469   | 210. 075316  | 469. 252 | 18530904. 32 |
| M210T143   | 210. 0753687 | 142. 85  | 33814879. 73 |
| M210T168   | 210. 0751977 | 167. 804 | 12291268. 59 |
| M210T336   | 210. 0750758 | 336. 344 | 41191132. 53 |
| M210T155   | 210. 0753452 | 155. 197 | 13561457. 65 |
| M210T301   | 210. 0750799 | 300. 782 | 11358732. 73 |
| M210T142   | 210. 0964184 | 141. 825 | 5909425. 474 |
| M210T113   | 210. 0964239 | 112. 781 | 11356013. 61 |
| M210T727   | 210. 1114401 | 726. 707 | 21098465. 25 |
| M210T411   | 210. 1128761 | 410. 542 | 36498864. 29 |
| M210T78    | 210. 1096655 | 78. 3841 | 6975349. 936 |
| M210T293   | 210. 1117361 | 292. 623 | 11128150. 75 |
| M210T702   | 210. 1116191 | 702. 055 | 10618082. 94 |
| M210T422   | 210. 1121408 | 421. 784 | 68344766. 72 |
| M210T341   | 210. 1135382 | 340. 548 | 18066349. 12 |
| M210T191   | 210. 1117814 | 190. 962 | 13254429. 41 |
| M210T348   | 210. 1247762 | 348. 488 | 11728525. 37 |
| M210T416   | 210. 1231382 | 416. 239 | 7119828. 764 |
| M210T388   | 210. 1229818 | 387. 763 | 10195026. 9  |
| M210T452   | 210. 1696658 | 451. 804 | 649532. 6619 |
| M211T116   | 210. 5324196 | 115. 522 | 3427855. 296 |
| M211T82    | 210. 8813412 | 82. 0569 | 6374488. 498 |
| M211T358   | 210. 990711  | 357. 958 | 3370009. 508 |
| M211T445   | 211. 0307935 | 444. 725 | 5196356. 804 |
| M211T336_1 | 211. 0489627 | 336. 344 | 2865500. 942 |
| M211T293   | 211. 0592397 | 292. 623 | 21315801. 26 |
| M211T128   | 211. 0591841 | 127. 944 | 4862787. 301 |
| M211T181   | 211. 05934   | 181. 154 | 6815743. 502 |
| M211T143   | 211. 0575633 | 142. 85  | 12079991. 67 |
| M211T545   | 211. 05911   | 545. 203 | 7352862. 244 |
| M211T104   | 211. 0593155 | 104. 493 | 68257420. 83 |
| M211T164   | 211. 0642642 | 163. 846 | 90446227. 23 |
| M211T183   | 211. 0705282 | 182. 574 | 19649047. 66 |
| M211T350   | 211. 0705164 | 349. 911 | 7127417. 986 |
| M211T106_1 | 211. 0805343 | 105. 503 | 20486709. 73 |
| M211T121   | 211. 0803018 | 120. 525 | 35303629. 65 |
| M211T336_2 | 211. 0788223 | 336. 344 | 3662189. 995 |
| M211T645   | 211. 0959034 | 645. 278 | 6003374. 512 |
| M211T388_1 | 211. 0957477 | 387. 763 | 3478531. 601 |

|            |              |          |              |
|------------|--------------|----------|--------------|
| M211T418   | 211. 0959391 | 417. 676 | 6522997. 225 |
| M211T533   | 211. 0957453 | 532. 526 | 6071763. 73  |
| M211T512   | 211. 095968  | 511. 77  | 4887604. 074 |
| M211T302   | 211. 1093781 | 302. 191 | 12497530. 14 |
| M211T295   | 211. 1072085 | 295. 356 | 10806275. 77 |
| M211T106_2 | 211. 1069354 | 105. 503 | 18298643. 79 |
| M211T199   | 211. 1074742 | 199. 43  | 9861051. 689 |
| M211T258   | 211. 1070242 | 258. 489 | 7748185. 565 |
| M211T316   | 211. 1090894 | 315. 701 | 12565503. 93 |
| M211T379   | 211. 1072118 | 379. 194 | 19370298     |
| M211T327   | 211. 1072063 | 326. 78  | 19443940. 68 |
| M211T351   | 211. 1185057 | 351. 348 | 322846062. 2 |
| M211T338   | 211. 11703   | 337. 767 | 284556889. 6 |
| M211T743   | 211. 1319352 | 742. 68  | 11067855. 56 |
| M211T785   | 211. 1319875 | 785. 136 | 3064887. 089 |
| M211T795   | 211. 1320169 | 795. 165 | 6203380. 323 |
| M211T698   | 211. 13203   | 697. 952 | 4153994. 613 |
| M211T339   | 211. 1309587 | 339. 085 | 20489635. 13 |
| M211T685   | 211. 1320245 | 684. 985 | 9048813. 665 |
| M211T753   | 211. 1319366 | 752. 541 | 22911219. 07 |
| M211T768   | 211. 1319758 | 768. 166 | 5810571. 903 |
| M211T713   | 211. 1320189 | 713. 464 | 5818627. 381 |
| M211T722   | 211. 1319993 | 722. 193 | 5399598. 703 |
| M211T518   | 211. 1424626 | 517. 762 | 134919666. 8 |
| M211T500   | 211. 1422076 | 500. 045 | 102589945. 9 |
| M211T388_2 | 211. 1433728 | 387. 763 | 4514868. 866 |
| M211T471   | 211. 1436294 | 470. 602 | 5350126. 639 |
| M211T317   | 211. 1434601 | 317. 199 | 5720114. 046 |
| M211T622   | 211. 1687639 | 621. 708 | 3675136. 502 |
| M211T540   | 211. 1687779 | 539. 764 | 3214589. 666 |
| M211T516   | 211. 1683687 | 516. 214 | 4877473. 448 |
| M211T531   | 211. 1683814 | 531. 127 | 4191798. 224 |
| M211T552   | 211. 1686521 | 552. 452 | 8705589. 263 |
| M211T751   | 211. 1685758 | 751. 333 | 40042055. 94 |
| M212T101   | 211. 5513655 | 101. 161 | 16983139. 62 |
| M212T111   | 211. 5515339 | 111. 382 | 17648926. 27 |
| M212T133   | 211. 5515028 | 133. 259 | 31655751. 68 |
| M212T382   | 211. 6102405 | 382. 125 | 1049323. 464 |
| M212T341   | 211. 6337889 | 340. 548 | 2544231. 2   |
| M212T632   | 211. 6773172 | 631. 982 | 1026577. 418 |
| M212T163   | 212. 0064036 | 162. 728 | 250199209. 3 |
| M212T241   | 212. 0390429 | 241. 368 | 1924799. 54  |
| M212T119   | 212. 0543916 | 119. 433 | 22655678     |
| M212T418   | 212. 0543482 | 417. 676 | 4308703. 08  |
| M212T143   | 212. 054413  | 142. 85  | 15742490. 41 |
| M212T154   | 212. 0542951 | 153. 785 | 2970699. 054 |
| M212T197   | 212. 0522569 | 196. 644 | 12038206. 44 |
| M212T104_1 | 212. 0546645 | 104. 493 | 14894844. 86 |
| M212T164   | 212. 0640647 | 163. 846 | 18496911. 99 |
| M212T158   | 212. 0906388 | 157. 773 | 23553723. 2  |
| M212T202   | 212. 0910094 | 202. 149 | 129549422. 9 |
| M212T180   | 212. 0909193 | 179. 75  | 43106923. 47 |
| M212T106   | 212. 0908665 | 105. 503 | 33056596. 94 |
| M212T167   | 212. 0907723 | 166. 613 | 20685712. 53 |

|            |              |          |              |
|------------|--------------|----------|--------------|
| M212T408   | 212. 0909654 | 407. 724 | 33155353. 78 |
| M212T770   | 212. 0896685 | 769. 702 | 8464925. 329 |
| M212T286   | 212. 0908117 | 285. 9   | 31814934. 07 |
| M212T260   | 212. 0907517 | 259. 74  | 13702382. 51 |
| M212T145   | 212. 0909159 | 145. 382 | 37137409. 29 |
| M212T302   | 212. 0914109 | 302. 191 | 37332996. 5  |
| M212T339_1 | 212. 0909637 | 339. 085 | 32323673. 8  |
| M212T465   | 212. 090633  | 464. 668 | 63266227. 62 |
| M212T191   | 212. 0909074 | 190. 962 | 124619903. 2 |
| M212T234   | 212. 090945  | 234. 447 | 62686993. 16 |
| M212T494   | 212. 0918    | 494. 289 | 27335441. 61 |
| M212T317   | 212. 0916898 | 317. 199 | 31732164. 92 |
| M212T206   | 212. 1019807 | 205. 903 | 701838216    |
| M212T287   | 212. 1019898 | 287. 148 | 53072375. 93 |
| M212T104_2 | 212. 1022733 | 104. 493 | 12870381. 88 |
| M212T305_1 | 212. 1019364 | 304. 777 | 1458708063   |
| M212T348   | 212. 1201496 | 348. 488 | 14969558. 22 |
| M212T471   | 212. 1179217 | 470. 602 | 4144334. 337 |
| M212T622   | 212. 1274416 | 621. 708 | 4173323. 521 |
| M212T37    | 212. 1272727 | 37. 1891 | 3567714. 707 |
| M212T552   | 212. 1272431 | 552. 452 | 2062488. 272 |
| M212T339_2 | 212. 1292613 | 339. 085 | 9196905. 984 |
| M212T422   | 212. 1275766 | 421. 784 | 2617188. 627 |
| M212T402   | 212. 1274879 | 401. 963 | 3032932. 876 |
| M212T104_3 | 212. 1274477 | 104. 493 | 4352256. 196 |
| M212T635   | 212. 1275026 | 635. 022 | 7994051. 348 |
| M212T649   | 212. 1637938 | 649. 338 | 4459683. 658 |
| M212T677   | 212. 163827  | 677. 376 | 4164449. 019 |
| M212T751   | 212. 1719837 | 751. 333 | 4398371. 618 |
| M212T305_2 | 212. 2029399 | 304. 777 | 1470928. 982 |
| M213T164   | 212. 5090371 | 163. 846 | 34822608. 27 |
| M213T81    | 212. 8409082 | 80. 824  | 3542182. 365 |
| M213T163_1 | 213. 014948  | 162. 728 | 4823764. 384 |
| M213T148   | 213. 0206494 | 148. 117 | 1228390. 395 |
| M213T652   | 213. 0380569 | 651. 956 | 25562776. 89 |
| M213T659   | 213. 0381478 | 658. 953 | 36122436. 22 |
| M213T706   | 213. 0385298 | 706. 229 | 3974757. 777 |
| M213T456   | 213. 0653747 | 456. 126 | 3160564. 326 |
| M213T494   | 213. 0650846 | 494. 289 | 2165776. 024 |
| M213T557   | 213. 0748668 | 556. 816 | 2486262. 374 |
| M213T163_2 | 213. 0750355 | 162. 728 | 1565800      |
| M213T711   | 213. 0751214 | 710. 534 | 2890914. 801 |
| M213T396   | 213. 073496  | 396. 415 | 10478498. 2  |
| M213T376   | 213. 07498   | 376. 409 | 16442800. 61 |
| M213T327   | 213. 0753131 | 326. 78  | 3159782. 067 |
| M213T335   | 213. 0867643 | 334. 966 | 12966244. 16 |
| M213T160   | 213. 0860634 | 160. 369 | 12069682. 92 |
| M213T150   | 213. 0860289 | 149. 65  | 20592186. 7  |
| M213T197   | 213. 0860662 | 196. 644 | 13539659. 28 |
| M213T320_1 | 213. 0857595 | 319. 758 | 35802072. 32 |
| M213T173   | 213. 0861028 | 173. 407 | 12263636. 62 |
| M213T104   | 213. 0863909 | 104. 493 | 4595643. 324 |
| M213T408   | 213. 0944898 | 407. 724 | 1906378. 387 |
| M213T302   | 213. 0946232 | 302. 191 | 3622344. 346 |

|            |             |         |             |
|------------|-------------|---------|-------------|
| M213T465   | 213.0945462 | 464.668 | 5785498.275 |
| M213T206   | 213.1051819 | 205.903 | 65935621.02 |
| M213T436   | 213.1019258 | 436.069 | 5056990.931 |
| M213T645   | 213.1111533 | 645.278 | 30245807.31 |
| M213T463   | 213.1116259 | 463.271 | 3257670.931 |
| M213T425   | 213.111546  | 424.572 | 2876467.161 |
| M213T305   | 213.1054811 | 304.777 | 137446284.3 |
| M213T92    | 213.1225097 | 91.7174 | 74418650.48 |
| M213T97    | 213.1225316 | 96.7698 | 124390753.8 |
| M213T369   | 213.1219007 | 369.321 | 41618118.1  |
| M213T308   | 213.122618  | 307.735 | 8112998.234 |
| M213T293   | 213.1223122 | 292.623 | 9702935.097 |
| M213T106   | 213.1225687 | 105.503 | 48013377.2  |
| M213T393   | 213.1218875 | 392.715 | 80780345.47 |
| M213T143   | 213.1226223 | 142.85  | 10842841.39 |
| M213T321   | 213.1226537 | 321.198 | 20183053.46 |
| M213T341   | 213.1227437 | 340.548 | 6646172.916 |
| M213T354   | 213.1227141 | 353.978 | 8716988.025 |
| M213T230   | 213.1337715 | 230.321 | 5656190.26  |
| M213T320_2 | 213.1339564 | 319.758 | 46836565.12 |
| M213T705   | 213.1479689 | 704.715 | 53406505.71 |
| M213T747   | 213.1480362 | 746.977 | 7852657.09  |
| M213T592   | 213.1479456 | 592.067 | 11336477.84 |
| M213T737   | 213.1479744 | 737.198 | 13359166.38 |
| M213T554   | 213.1611137 | 553.936 | 28015830.17 |
| M213T770   | 213.1842401 | 769.702 | 7104530.75  |
| M213T527   | 213.1845522 | 526.676 | 3329382.195 |
| M214T176   | 213.5437567 | 175.952 | 9937842.759 |
| M214T458   | 213.562185  | 457.576 | 1871607.063 |
| M214T503_1 | 213.5743369 | 503.046 | 8728349.57  |
| M214T777   | 213.5832288 | 777.245 | 6235265.937 |
| M214T708   | 213.5998913 | 707.557 | 4477012.044 |
| M214T63    | 213.9684466 | 63.4448 | 2777680.345 |
| M214T52    | 213.9686548 | 52.4521 | 1455409.944 |
| M214T44    | 213.9690027 | 44.1485 | 461278.2914 |
| M214T61    | 213.982751  | 61.1538 | 1626887.734 |
| M214T55    | 213.9820294 | 54.867  | 7803369.775 |
| M214T68    | 213.9827287 | 68.0903 | 1970490.12  |
| M214T698   | 213.9820316 | 697.952 | 9167441.635 |
| M214T712_1 | 213.9819546 | 711.984 | 26200659.51 |
| M214T211   | 213.9786147 | 211.288 | 18704604.53 |
| M214T35    | 213.9819449 | 34.5397 | 24900888.99 |
| M214T119   | 214.0013479 | 119.433 | 50633864.63 |
| M214T36    | 214.0025151 | 35.8675 | 5386153.285 |
| M214T75    | 214.0039943 | 74.9588 | 14149103.24 |
| M214T392   | 214.0702622 | 391.678 | 7488430.73  |
| M214T159   | 214.0697533 | 159.017 | 20680399.14 |
| M214T374   | 214.0703338 | 373.532 | 83957338.97 |
| M214T192   | 214.0705611 | 192.437 | 21780731.02 |
| M214T104_1 | 214.0702629 | 104.493 | 41734289.6  |
| M214T503_2 | 214.0767675 | 503.046 | 1562750.181 |
| M214T156   | 214.081521  | 156.393 | 1632573.51  |
| M214T164   | 214.1066222 | 163.846 | 16647903.87 |
| M214T367   | 214.1064069 | 366.514 | 33662147.78 |

|            |              |          |              |
|------------|--------------|----------|--------------|
| M214T388   | 214. 1065662 | 387. 763 | 11289529. 44 |
| M214T469   | 214. 106698  | 469. 252 | 19257983. 77 |
| M214T350   | 214. 106661  | 349. 911 | 13996288. 28 |
| M214T243   | 214. 1071062 | 242. 682 | 20491310. 61 |
| M214T446   | 214. 106682  | 445. 984 | 9956321. 762 |
| M214T488   | 214. 1063861 | 488. 437 | 6713078. 362 |
| M214T358   | 214. 1066996 | 357. 958 | 29755430. 27 |
| M214T104_2 | 214. 1067008 | 104. 493 | 41561269. 98 |
| M214T305   | 214. 1067294 | 304. 777 | 15282436. 79 |
| M214T109   | 214. 117881  | 108. 698 | 17223228. 19 |
| M214T332   | 214. 117881  | 332. 2   | 52563464. 89 |
| M214T339   | 214. 1178037 | 339. 085 | 33080802. 26 |
| M214T150   | 214. 1178594 | 149. 65  | 44456049. 41 |
| M214T316   | 214. 1178377 | 315. 701 | 32272442. 93 |
| M214T175   | 214. 1179427 | 174. 865 | 29601065. 35 |
| M214T393   | 214. 1257306 | 392. 715 | 7263687. 162 |
| M214T295   | 214. 1202691 | 295. 356 | 17144800. 82 |
| M214T347   | 214. 1178571 | 347. 175 | 22621938. 05 |
| M214T497   | 214. 1291154 | 497. 214 | 3814598. 197 |
| M214T299   | 214. 1426794 | 299. 493 | 1758112. 728 |
| M214T185   | 214. 1427887 | 185. 398 | 6715202. 638 |
| M214T335   | 214. 1429373 | 334. 966 | 2300142. 896 |
| M214T172   | 214. 1429035 | 171. 935 | 3953534. 077 |
| M214T705   | 214. 1511689 | 704. 715 | 5876632. 067 |
| M214T712_2 | 214. 1794797 | 711. 984 | 54663474. 06 |
| M214T734   | 214. 1793853 | 734. 269 | 7629987. 684 |
| M214T770   | 214. 2517464 | 769. 702 | 11945273. 84 |
| M215T252   | 214. 5096581 | 251. 555 | 2759367. 84  |
| M215T325   | 214. 5276915 | 325. 35  | 8620579. 74  |
| M215T443_1 | 214. 5387967 | 443. 256 | 16399217. 6  |
| M215T126   | 214. 546016  | 125. 598 | 3426123. 817 |
| M215T456   | 214. 5824818 | 456. 126 | 6625178. 948 |
| M215T522   | 214. 5827378 | 522. 177 | 3635513. 782 |
| M215T323   | 214. 6156663 | 322. 536 | 1402715. 106 |
| M215T38    | 214. 9862251 | 38. 3208 | 911131. 2395 |
| M215T218   | 214. 9870105 | 217. 866 | 649730. 1547 |
| M215T164   | 215. 0154623 | 163. 846 | 1190330145   |
| M215T443_2 | 215. 0416103 | 443. 256 | 2738237. 627 |
| M215T286_1 | 215. 0542461 | 285. 9   | 2407769. 592 |
| M215T451   | 215. 081004  | 450. 503 | 4071616. 725 |
| M215T777   | 215. 086601  | 777. 245 | 3624094. 376 |
| M215T438   | 215. 0810913 | 437. 571 | 6703045. 544 |
| M215T288   | 215. 1019089 | 288. 481 | 19260981. 5  |
| M215T260   | 215. 1014728 | 259. 74  | 87803857. 34 |
| M215T177   | 215. 1017674 | 177. 295 | 74481226. 83 |
| M215T341   | 215. 0998549 | 340. 548 | 5659824. 8   |
| M215T359   | 215. 1020418 | 359. 32  | 14503441. 39 |
| M215T104   | 215. 1019615 | 104. 493 | 17201395. 06 |
| M215T327   | 215. 1018339 | 326. 78  | 5967685. 268 |
| M215T219_1 | 215. 1017868 | 219. 233 | 38435068. 2  |
| M215T432   | 215. 1031835 | 431. 64  | 3989873. 314 |
| M215T148   | 215. 1210109 | 148. 117 | 3149211. 751 |
| M215T429   | 215. 1171903 | 428. 735 | 22449518. 96 |
| M215T393   | 215. 128154  | 392. 715 | 4834826. 691 |

|            |              |          |              |
|------------|--------------|----------|--------------|
| M215T487   | 215. 1276801 | 486. 885 | 16029698. 15 |
| M215T549   | 215. 1269415 | 549. 375 | 22373700. 18 |
| M215T161   | 215. 1382961 | 161. 494 | 29530911. 67 |
| M215T286_2 | 215. 1381915 | 285. 9   | 43778592. 44 |
| M215T334   | 215. 1396732 | 333. 715 | 79183817. 88 |
| M215T194   | 215. 1382615 | 193. 823 | 22373788. 83 |
| M215T219_2 | 215. 1385233 | 219. 233 | 12267694. 08 |
| M215T497   | 215. 1418264 | 497. 214 | 574540. 7618 |
| M215T271   | 215. 1496818 | 270. 983 | 10569305. 12 |
| M215T712   | 215. 1635848 | 711. 984 | 2786071. 484 |
| M215T41    | 215. 1631842 | 40. 6031 | 4213179. 437 |
| M215T69    | 215. 163295  | 69. 2834 | 1330535. 014 |
| M215T639   | 215. 175485  | 639. 219 | 4059519. 549 |
| M215T669   | 215. 1788095 | 668. 867 | 6746967. 078 |
| M215T649   | 215. 1784698 | 649. 338 | 12898965. 68 |
| M215T461   | 215. 1791141 | 460. 537 | 1402919. 014 |
| M215T702   | 215. 1789545 | 702. 055 | 17307936. 82 |
| M215T562   | 215. 1784853 | 561. 955 | 63147007. 88 |
| M215T545   | 215. 1788343 | 545. 203 | 17568258. 2  |
| M215T770   | 215. 2555996 | 769. 702 | 957096. 1003 |
| M216T455   | 215. 5540083 | 454. 739 | 1388357. 391 |
| M216T334_1 | 215. 5728283 | 333. 715 | 2205195. 884 |
| M216T419   | 215. 5905931 | 418. 97  | 4726613. 896 |
| M216T724   | 215. 9795526 | 723. 682 | 6489116. 222 |
| M216T35    | 215. 9788964 | 34. 5397 | 5392983. 346 |
| M216T730   | 215. 9820705 | 729. 798 | 5266128. 844 |
| M216T746   | 215. 9820514 | 745. 603 | 4096170. 397 |
| M216T794   | 215. 9828107 | 793. 649 | 5354652. 652 |
| M216T754   | 215. 9820788 | 753. 987 | 3188792. 377 |
| M216T737   | 215. 9820063 | 737. 198 | 4234323. 672 |
| M216T768   | 215. 9820749 | 768. 166 | 5317605. 265 |
| M216T781   | 215. 9821019 | 781. 303 | 8896698. 219 |
| M216T74    | 215. 9921618 | 73. 8324 | 79191221. 29 |
| M216T210   | 216. 0172693 | 210. 186 | 9036775. 974 |
| M216T164   | 216. 0181611 | 163. 846 | 72703240. 19 |
| M216T144_1 | 216. 0497758 | 143. 959 | 2275201. 153 |
| M216T241   | 216. 0538273 | 241. 368 | 9326556. 126 |
| M216T88    | 216. 0621836 | 87. 6739 | 14262147. 37 |
| M216T512   | 216. 0649275 | 511. 77  | 10313208. 3  |
| M216T777   | 216. 0842872 | 777. 245 | 88157655. 59 |
| M216T144_2 | 216. 0857825 | 143. 959 | 28212234. 68 |
| M216T190   | 216. 08594   | 189. 571 | 10639894. 94 |
| M216T106_1 | 216. 0858109 | 105. 503 | 55559559. 64 |
| M216T252   | 216. 086239  | 251. 555 | 11755236. 84 |
| M216T286   | 216. 0858552 | 285. 9   | 12085447. 19 |
| M216T323   | 216. 0859001 | 322. 536 | 21291560. 55 |
| M216T91    | 216. 0855138 | 90. 7088 | 120308867. 5 |
| M216T358   | 216. 085929  | 357. 958 | 8028349. 613 |
| M216T379   | 216. 086332  | 379. 194 | 19252705. 34 |
| M216T201   | 216. 0974978 | 200. 766 | 47802428. 58 |
| M216T106_2 | 216. 0975291 | 105. 503 | 9782162. 044 |
| M216T260   | 216. 1055446 | 259. 74  | 6715738. 039 |
| M216T816   | 216. 1025058 | 815. 517 | 6830968. 01  |
| M216T709   | 216. 1022746 | 709. 106 | 4570700. 794 |



|            |              |          |              |
|------------|--------------|----------|--------------|
| M216T718   | 216. 1021278 | 717. 959 | 1198439. 962 |
| M216T381   | 216. 1005389 | 380. 63  | 8900214. 024 |
| M216T468   | 216. 1013046 | 467. 706 | 2670857. 644 |
| M216T394   | 216. 1012739 | 393. 934 | 3908153. 806 |
| M216T163   | 216. 1224537 | 162. 728 | 24198314. 05 |
| M216T122   | 216. 1223852 | 122. 007 | 90729285. 64 |
| M216T143   | 216. 122377  | 142. 85  | 75113868. 31 |
| M216T171   | 216. 1223792 | 170. 665 | 10332888. 01 |
| M216T104   | 216. 1223551 | 104. 493 | 399609644. 3 |
| M216T393   | 216. 1232434 | 392. 715 | 45907690. 62 |
| M216T362   | 216. 1228067 | 362. 146 | 10752940. 01 |
| M216T466   | 216. 1227438 | 466. 162 | 9808850. 197 |
| M216T494   | 216. 1227588 | 494. 289 | 13838169. 66 |
| M216T353   | 216. 1337384 | 352. 65  | 4447788. 001 |
| M216T334_2 | 216. 1417904 | 333. 715 | 6790725. 611 |
| M216T598   | 216. 1585278 | 598. 125 | 13435646. 59 |
| M216T297   | 216. 1585438 | 296. 739 | 51733428. 76 |
| M216T331   | 216. 1588617 | 330. 809 | 9876973. 506 |
| M216T480   | 216. 1590092 | 479. 527 | 4758575. 588 |
| M216T663   | 216. 194698  | 663. 287 | 32087343. 82 |
| M217T474   | 216. 5617656 | 473. 597 | 3430398. 334 |
| M217T354   | 216. 6257862 | 353. 978 | 2764376. 122 |
| M217T75    | 216. 9495281 | 74. 9588 | 71747191. 85 |
| M217T131   | 216. 9663743 | 130. 668 | 4747744. 204 |
| M217T164   | 217. 0195253 | 163. 846 | 15231201. 52 |
| M217T395   | 217. 0488544 | 395. 264 | 2406147. 741 |
| M217T106_1 | 217. 0697861 | 105. 503 | 27303765. 77 |
| M217T291   | 217. 0698312 | 291. 307 | 20565532. 27 |
| M217T143   | 217. 0694228 | 142. 85  | 21295969. 51 |
| M217T126   | 217. 0811164 | 125. 598 | 10611066. 36 |
| M217T95    | 217. 0811776 | 94. 7467 | 10057778. 74 |
| M217T645   | 217. 0852128 | 645. 278 | 4256483. 183 |
| M217T106_2 | 217. 081203  | 105. 503 | 8739831. 596 |
| M217T465   | 217. 088103  | 464. 668 | 1138824. 247 |
| M217T777   | 217. 0860124 | 777. 245 | 12103406. 72 |
| M217T325   | 217. 0964866 | 325. 35  | 4179967. 947 |
| M217T443   | 217. 0964242 | 443. 256 | 462138082    |
| M217T814_1 | 217. 1023293 | 814. 095 | 16974575. 42 |
| M217T201   | 217. 101294  | 200. 766 | 3725630. 184 |
| M217T456   | 217. 1064347 | 456. 126 | 6032774. 283 |
| M217T565   | 217. 1062392 | 564. 534 | 31350594. 87 |
| M217T104   | 217. 1173199 | 104. 493 | 63988986. 46 |
| M217T639   | 217. 1217703 | 639. 219 | 13343533. 39 |
| M217T393   | 217. 1256868 | 392. 715 | 4634086. 776 |
| M217T452   | 217. 1223342 | 451. 804 | 6616650. 332 |
| M217T709   | 217. 1218086 | 709. 106 | 6956969. 66  |
| M217T485   | 217. 1221963 | 485. 471 | 5063634. 932 |
| M217T814_2 | 217. 1213876 | 814. 095 | 22369832. 53 |
| M217T123   | 217. 1266302 | 123. 262 | 11438841. 04 |
| M217T494   | 217. 1219085 | 494. 289 | 5822910. 667 |
| M217T525   | 217. 1224384 | 525. 132 | 26643612. 71 |
| M217T567   | 217. 1217413 | 567. 1   | 93841316. 11 |
| M217T106_3 | 217. 1298777 | 105. 503 | 222200889    |
| M217T218   | 217. 128778  | 217. 866 | 20678647. 58 |

|            |              |          |              |
|------------|--------------|----------|--------------|
| M217T385   | 217. 1323891 | 385. 081 | 25301271. 51 |
| M217T487   | 217. 1332254 | 486. 885 | 818479. 2675 |
| M217T432   | 217. 1543992 | 431. 64  | 49679026. 19 |
| M217T649_1 | 217. 1560137 | 649. 338 | 8274872. 095 |
| M217T331   | 217. 1539883 | 330. 809 | 55180938. 07 |
| M217T442   | 217. 1545653 | 442. 005 | 47311546. 74 |
| M217T669_1 | 217. 1579371 | 668. 867 | 8856041. 293 |
| M217T682_1 | 217. 1584579 | 681. 885 | 10778013. 96 |
| M217T562_1 | 217. 1579201 | 561. 955 | 34266775. 3  |
| M217T545_1 | 217. 1578766 | 545. 203 | 17524362. 58 |
| M217T694_1 | 217. 1582058 | 693. 81  | 12349949. 88 |
| M217T576_1 | 217. 1578542 | 575. 878 | 10674540. 19 |
| M217T51    | 217. 1790541 | 51. 1942 | 8889048. 188 |
| M217T791   | 217. 1941577 | 790. 802 | 31352807. 58 |
| M217T669_2 | 217. 1941979 | 668. 867 | 284875360. 4 |
| M217T649_2 | 217. 1942124 | 649. 338 | 391572798. 1 |
| M217T682_2 | 217. 1942037 | 681. 885 | 205580887. 5 |
| M217T562_2 | 217. 1942775 | 561. 955 | 1944114113   |
| M217T719   | 217. 1941621 | 719. 215 | 113858184. 1 |
| M217T607   | 217. 194176  | 606. 774 | 48052696. 24 |
| M217T740   | 217. 1942043 | 740. 014 | 45853852. 62 |
| M217T703   | 217. 1942    | 703. 35  | 424107415. 3 |
| M217T545_2 | 217. 1942422 | 545. 203 | 257174776. 5 |
| M217T632   | 217. 194173  | 631. 982 | 39697426. 34 |
| M217T694_2 | 217. 1942216 | 693. 81  | 288296603. 1 |
| M217T576_2 | 217. 1941786 | 575. 878 | 68372706. 25 |
| M217T772   | 217. 1941681 | 772. 206 | 40326138. 79 |
| M217T588   | 217. 1941643 | 587. 521 | 44665516     |
| M218T148   | 217. 5330688 | 148. 117 | 15052677. 06 |
| M218T381   | 217. 5694916 | 380. 63  | 10079126. 09 |
| M218T779   | 217. 584476  | 778. 543 | 1696277. 381 |
| M218T68    | 217. 958645  | 68. 0903 | 3392678. 876 |
| M218T62    | 217. 958704  | 62. 1777 | 4492682. 269 |
| M218T42    | 217. 958766  | 41. 798  | 9413617. 872 |
| M218T37    | 217. 9970541 | 37. 1891 | 11418673. 21 |
| M218T190_1 | 218. 0646318 | 189. 571 | 21990002. 11 |
| M218T143_1 | 218. 0651443 | 142. 85  | 16627363. 83 |
| M218T101   | 218. 0653614 | 101. 161 | 9590128. 718 |
| M218T163   | 218. 065288  | 162. 728 | 16237201. 53 |
| M218T568   | 218. 0685929 | 568. 464 | 9974968. 339 |
| M218T477   | 218. 0786994 | 476. 554 | 17097748. 44 |
| M218T641   | 218. 0799437 | 640. 717 | 5236074. 046 |
| M218T594   | 218. 07854   | 593. 62  | 6481819. 48  |
| M218T353   | 218. 0809892 | 352. 65  | 5237343. 91  |
| M218T617   | 218. 0806178 | 617. 133 | 6074357. 613 |
| M218T537   | 218. 0803658 | 536. 761 | 12927468. 55 |
| M218T398   | 218. 0809988 | 397. 878 | 5688108. 469 |
| M218T503   | 218. 0810974 | 503. 046 | 43995309. 72 |
| M218T692   | 218. 0806231 | 692. 461 | 3294511. 818 |
| M218T718   | 218. 0806393 | 717. 959 | 7323981. 466 |
| M218T342   | 218. 0809962 | 341. 802 | 10001723. 1  |
| M218T521   | 218. 0803887 | 520. 739 | 16368941. 31 |
| M218T325   | 218. 0914099 | 325. 35  | 8008806. 466 |
| M218T372   | 218. 1016974 | 372. 152 | 14794889. 8  |

|            |              |          |              |
|------------|--------------|----------|--------------|
| M218T230   | 218. 1016849 | 230. 321 | 6182536. 831 |
| M218T117   | 218. 1013079 | 116. 689 | 30858119. 97 |
| M218T143_2 | 218. 101359  | 142. 85  | 13468675. 42 |
| M218T816   | 218. 1005874 | 815. 517 | 6252048. 737 |
| M218T90    | 218. 1011335 | 89. 6999 | 130685518. 6 |
| M218T364   | 218. 1017465 | 363. 58  | 10098050. 68 |
| M218T443   | 218. 1001395 | 443. 256 | 59866381. 62 |
| M218T423   | 218. 1019895 | 423. 199 | 10345739. 5  |
| M218T304   | 218. 0997865 | 303. 513 | 7064812. 863 |
| M218T156   | 218. 1012939 | 156. 393 | 16367087. 34 |
| M218T323   | 218. 1017053 | 322. 536 | 21483984. 83 |
| M218T104_1 | 218. 1031467 | 104. 493 | 130061783. 2 |
| M218T332_1 | 218. 116962  | 332. 2   | 5850305. 329 |
| M218T190_2 | 218. 1127124 | 189. 571 | 18735328. 91 |
| M218T201   | 218. 1123757 | 200. 766 | 36467689. 14 |
| M218T369   | 218. 1387004 | 369. 321 | 7452574. 487 |
| M218T150   | 218. 1361503 | 149. 65  | 11665900. 02 |
| M218T708   | 218. 138012  | 707. 557 | 9614988. 225 |
| M218T143_3 | 218. 1360786 | 142. 85  | 24888150. 65 |
| M218T500   | 218. 138026  | 500. 045 | 2127393. 494 |
| M218T408   | 218. 1383375 | 407. 724 | 28253130. 28 |
| M218T121   | 218. 1375507 | 120. 525 | 140731788. 3 |
| M218T446   | 218. 139354  | 445. 984 | 4343253. 716 |
| M218T488   | 218. 1380213 | 488. 437 | 2882523. 771 |
| M218T396   | 218. 1383162 | 396. 415 | 8365259. 408 |
| M218T301   | 218. 1377384 | 300. 782 | 16813491. 65 |
| M218T104_2 | 218. 1375613 | 104. 493 | 665061085. 8 |
| M218T78    | 218. 1492423 | 78. 3841 | 3743558. 831 |
| M218T332_2 | 218. 1569806 | 332. 2   | 5284463. 178 |
| M218T669   | 218. 1978967 | 668. 867 | 48797891. 77 |
| M218T649   | 218. 1977788 | 649. 338 | 61003699. 93 |
| M218T682   | 218. 1978698 | 681. 885 | 34992766. 86 |
| M218T562   | 218. 1965224 | 561. 955 | 322568517. 5 |
| M218T719   | 218. 1978474 | 719. 215 | 19245966. 27 |
| M218T607   | 218. 1966363 | 606. 774 | 7144192. 589 |
| M218T740   | 218. 1978975 | 740. 014 | 7671764. 34  |
| M218T703   | 218. 1978794 | 703. 35  | 70314465. 1  |
| M218T694   | 218. 1979025 | 693. 81  | 48483208. 9  |
| M218T576   | 218. 196737  | 575. 878 | 10420966     |
| M218T577   | 218. 2104704 | 577. 366 | 6541674. 445 |
| M219T632   | 218. 6091223 | 631. 982 | 2130470. 544 |
| M219T211   | 218. 9586532 | 211. 288 | 8986993. 803 |
| M219T60    | 218. 9734583 | 59. 9075 | 10448700. 45 |
| M219T114   | 218. 9764639 | 114. 15  | 6027559. 127 |
| M219T43    | 218. 9733888 | 43. 0471 | 26511940. 31 |
| M219T275   | 218. 9737999 | 274. 968 | 16144949. 73 |
| M219T133   | 218. 9741377 | 133. 259 | 20297945. 15 |
| M219T75    | 218. 9823062 | 74. 9588 | 752729795. 2 |
| M219T38    | 219. 0179434 | 38. 3208 | 968445. 3717 |
| M219T93    | 219. 0249297 | 92. 7272 | 137013842. 6 |
| M219T358_1 | 219. 0459677 | 357. 958 | 5615835. 475 |
| M219T123_1 | 219. 0605469 | 123. 262 | 14066709. 92 |
| M219T111   | 219. 0605775 | 111. 382 | 1561239. 517 |
| M219T136   | 219. 0607143 | 135. 971 | 5043045. 646 |

|            |             |         |             |
|------------|-------------|---------|-------------|
| M219T522_1 | 219.0644303 | 522.177 | 3076855.557 |
| M219T481   | 219.0645022 | 481.042 | 2963293.11  |
| M219T411   | 219.0762768 | 410.542 | 8619401.956 |
| M219T515   | 219.076131  | 514.727 | 4477051.16  |
| M219T226   | 219.0856153 | 226.202 | 6707510.421 |
| M219T272   | 219.0855669 | 272.304 | 12628452.05 |
| M219T100   | 219.0966746 | 100.146 | 31536424.61 |
| M219T108   | 219.0967008 | 107.537 | 17721452.77 |
| M219T156   | 219.0964109 | 156.393 | 10950477.22 |
| M219T522_2 | 219.1010327 | 522.177 | 5571858.425 |
| M219T639   | 219.1005219 | 639.219 | 6987941.841 |
| M219T534   | 219.1009524 | 533.958 | 13912078.55 |
| M219T143   | 219.106475  | 142.85  | 129483259.4 |
| M219T491   | 219.1030355 | 491.373 | 21160589.16 |
| M219T504   | 219.1009519 | 504.466 | 21298791.88 |
| M219T601   | 219.1008947 | 601.04  | 9803065.716 |
| M219T545_1 | 219.100994  | 545.203 | 79897366.55 |
| M219T425   | 219.1034008 | 424.572 | 3004122.716 |
| M219T652   | 219.10058   | 651.956 | 3074238.206 |
| M219T443   | 219.1029536 | 443.256 | 7031623.24  |
| M219T475   | 219.1110157 | 475.007 | 12603465.24 |
| M219T350   | 219.1123775 | 349.911 | 8838589.002 |
| M219T110   | 219.1082412 | 110.047 | 57998118.98 |
| M219T123_2 | 219.108282  | 123.262 | 31026480.36 |
| M219T378   | 219.112776  | 377.704 | 11527235.33 |
| M219T362   | 219.1124855 | 362.146 | 21618199.87 |
| M219T320   | 219.1128097 | 319.758 | 20200289.07 |
| M219T102   | 219.1293257 | 102.247 | 14278323.97 |
| M219T304   | 219.1283952 | 303.513 | 1367818.467 |
| M219T524   | 219.1374406 | 523.735 | 7597006.527 |
| M219T239   | 219.132798  | 238.605 | 19018838.99 |
| M219T346   | 219.1306842 | 345.848 | 12852454.09 |
| M219T636   | 219.1371873 | 636.473 | 8276768.336 |
| M219T192   | 219.1332062 | 192.437 | 25708337.44 |
| M219T209   | 219.1329072 | 208.905 | 21642270.75 |
| M219T358_2 | 219.1328789 | 357.958 | 58890122.01 |
| M219T567   | 219.1371414 | 567.1   | 15995621.13 |
| M219T122   | 219.1418341 | 122.007 | 13202560.87 |
| M219T628   | 219.1379649 | 627.58  | 5945371.593 |
| M219T104   | 219.1404831 | 104.493 | 67381680.17 |
| M219T485   | 219.14881   | 485.471 | 3741541.301 |
| M219T600   | 219.1731184 | 599.621 | 19110115.36 |
| M219T649   | 219.173162  | 649.338 | 14388832.59 |
| M219T750   | 219.1749109 | 749.96  | 17740111.68 |
| M219T656   | 219.1737769 | 655.9   | 17400455.83 |
| M219T622   | 219.1737668 | 621.708 | 45039396.82 |
| M219T787   | 219.1737364 | 786.569 | 22719134.87 |
| M219T780   | 219.1732213 | 780.043 | 10201174.16 |
| M219T574   | 219.1736926 | 574.363 | 20567483.52 |
| M219T680   | 219.1731774 | 680.402 | 34943632.92 |
| M219T813   | 219.1750072 | 812.862 | 49967411.27 |
| M219T702   | 219.173141  | 702.055 | 19225978.05 |
| M219T670_1 | 219.1731814 | 670.166 | 23867678.95 |
| M219T510   | 219.1737589 | 510.333 | 41320736.35 |

|            |              |          |              |
|------------|--------------|----------|--------------|
| M219T562_1 | 219. 173115  | 561. 955 | 123660544. 2 |
| M219T757   | 219. 1730151 | 757. 001 | 14656079. 26 |
| M219T838   | 219. 1732191 | 837. 524 | 8618653. 815 |
| M219T458   | 219. 173676  | 457. 576 | 11034755. 75 |
| M219T440   | 219. 1737446 | 440. 459 | 5185969. 795 |
| M219T545_2 | 219. 1737176 | 545. 203 | 53048474. 63 |
| M219T768   | 219. 1737194 | 768. 166 | 18664864. 86 |
| M219T737   | 219. 173796  | 737. 198 | 25293087. 96 |
| M219T694_1 | 219. 1730995 | 693. 81  | 30396232. 73 |
| M219T713   | 219. 1732537 | 713. 464 | 18154614. 2  |
| M219T490   | 219. 1737036 | 489. 826 | 13210730. 54 |
| M219T588   | 219. 1738409 | 587. 521 | 22143641. 64 |
| M219T670_2 | 219. 2101405 | 670. 166 | 10608424. 18 |
| M219T562_2 | 219. 2097617 | 561. 955 | 69435545. 84 |
| M219T703   | 219. 2099291 | 703. 35  | 9819653. 057 |
| M219T694_2 | 219. 209874  | 693. 81  | 8114560. 542 |
| M219T583   | 219. 2105371 | 583. 068 | 5409941. 567 |
| M220T74    | 219. 9832901 | 73. 8324 | 188738079. 1 |
| M220T121_1 | 220. 0228464 | 120. 525 | 6922524. 266 |
| M220T84    | 220. 040224  | 83. 5661 | 29279742. 91 |
| M220T92    | 220. 055562  | 91. 7174 | 27521654. 65 |
| M220T490   | 220. 0599133 | 489. 826 | 6222391. 944 |
| M220T354   | 220. 0596998 | 353. 978 | 4188795. 576 |
| M220T101   | 220. 081865  | 101. 161 | 109761902. 2 |
| M220T180   | 220. 0806605 | 179. 75  | 7126245. 627 |
| M220T129   | 220. 0807452 | 129. 234 | 5029485. 743 |
| M220T143_1 | 220. 080761  | 142. 85  | 9384599. 535 |
| M220T88    | 220. 0807824 | 87. 6739 | 164831387    |
| M220T121_2 | 220. 0806976 | 120. 525 | 24831923. 5  |
| M220T341_1 | 220. 0820767 | 340. 548 | 5542047. 101 |
| M220T278   | 220. 0807915 | 277. 699 | 13638368. 06 |
| M220T256   | 220. 0808137 | 255. 723 | 30057692. 32 |
| M220T156   | 220. 0807552 | 156. 393 | 5099890. 666 |
| M220T439   | 220. 0962696 | 439. 021 | 16426419. 93 |
| M220T451   | 220. 0955797 | 450. 503 | 4637994. 206 |
| M220T399_1 | 220. 0958262 | 399. 046 | 9000991. 841 |
| M220T350   | 220. 095936  | 349. 911 | 7503523. 789 |
| M220T371   | 220. 0959237 | 370. 777 | 8176638. 925 |
| M220T341_2 | 220. 0962229 | 340. 548 | 5396269. 522 |
| M220T358   | 220. 0959246 | 357. 958 | 7736750. 328 |
| M220T379   | 220. 0960184 | 379. 194 | 6769699. 017 |
| M220T327   | 220. 096094  | 326. 78  | 3161741. 015 |
| M220T545   | 220. 1045318 | 545. 203 | 7564436. 689 |
| M220T392   | 220. 1071739 | 391. 678 | 12376714. 9  |
| M220T411   | 220. 1080782 | 410. 542 | 17774764. 15 |
| M220T426   | 220. 1071615 | 425. 909 | 6900420. 007 |
| M220T97    | 220. 1171852 | 96. 7698 | 223901357. 1 |
| M220T143_2 | 220. 1161297 | 142. 85  | 18834832. 9  |
| M220T121_3 | 220. 113059  | 120. 525 | 3292189. 159 |
| M220T152   | 220. 1172393 | 152. 375 | 11563137. 38 |
| M220T361   | 220. 1168665 | 360. 794 | 125610551. 4 |
| M220T308   | 220. 1231363 | 307. 735 | 8503898. 405 |
| M220T295   | 220. 1233808 | 295. 356 | 3308518. 853 |
| M220T320   | 220. 123016  | 319. 758 | 2213888. 914 |

|            |              |          |              |
|------------|--------------|----------|--------------|
| M220T399_2 | 220. 1326333 | 399. 046 | 9229294. 567 |
| M220T446   | 220. 1323063 | 445. 984 | 4262061. 068 |
| M220T561   | 220. 1768098 | 560. 942 | 23852228. 23 |
| M220T680   | 220. 1772963 | 680. 402 | 3833546. 393 |
| M220T692   | 220. 1768605 | 692. 461 | 5209237. 886 |
| M221T376_1 | 220. 5464559 | 376. 409 | 3387462. 622 |
| M221T135   | 220. 5565797 | 134. 574 | 9924518. 817 |
| M221T351_1 | 220. 5660155 | 351. 348 | 2196249. 866 |
| M221T75    | 220. 9796608 | 74. 9588 | 198211011    |
| M221T121   | 221. 0122669 | 120. 525 | 18063802. 63 |
| M221T203   | 221. 0646438 | 203. 36  | 10267473. 57 |
| M221T574   | 221. 0589505 | 574. 363 | 3854552. 443 |
| M221T295_1 | 221. 0649094 | 295. 356 | 21765211. 83 |
| M221T148   | 221. 0648303 | 148. 117 | 6510585. 711 |
| M221T107   | 221. 0649159 | 106. 513 | 17445370. 17 |
| M221T478   | 221. 0762209 | 477. 989 | 336801. 8458 |
| M221T256   | 221. 0840971 | 255. 723 | 2302231. 948 |
| M221T351_2 | 221. 0918041 | 351. 348 | 31582550. 24 |
| M221T399   | 221. 0910809 | 399. 046 | 3681490. 555 |
| M221T210   | 221. 091055  | 210. 186 | 9079926. 999 |
| M221T295_2 | 221. 0906431 | 295. 356 | 21346058. 69 |
| M221T487_1 | 221. 0917597 | 486. 885 | 4133159. 52  |
| M221T240   | 221. 0913139 | 239. 913 | 8571951. 288 |
| M221T321   | 221. 0910471 | 321. 198 | 8238623. 007 |
| M221T268   | 221. 0950924 | 268. 427 | 3216114. 35  |
| M221T448_1 | 221. 0890604 | 447. 531 | 4313821. 679 |
| M221T305   | 221. 0908883 | 304. 777 | 15910366. 42 |
| M221T584   | 221. 1167783 | 584. 417 | 1633363. 323 |
| M221T42    | 221. 1159019 | 41. 798  | 1313189. 839 |
| M221T97    | 221. 1205095 | 96. 7698 | 19360080     |
| M221T777   | 221. 1205269 | 777. 245 | 5257259. 526 |
| M221T361   | 221. 1250024 | 360. 794 | 14258858. 17 |
| M221T374   | 221. 1280035 | 373. 532 | 7112464. 817 |
| M221T316   | 221. 1276215 | 315. 701 | 8890951. 424 |
| M221T347   | 221. 1252293 | 347. 175 | 6707143. 717 |
| M221T436   | 221. 1389913 | 436. 069 | 32594249     |
| M221T487_2 | 221. 1374142 | 486. 885 | 51101551. 6  |
| M221T448_2 | 221. 1389584 | 447. 531 | 41334349. 08 |
| M221T376_2 | 221. 1388279 | 376. 409 | 6234535. 671 |
| M221T830   | 221. 1527178 | 830. 193 | 5312942. 913 |
| M221T718   | 221. 1529686 | 717. 959 | 8840394. 992 |
| M221T632   | 221. 1530497 | 631. 982 | 9391259. 212 |
| M221T228   | 221. 1485991 | 227. 633 | 6837831. 975 |
| M221T459   | 221. 1893208 | 458. 985 | 5792959. 909 |
| M221T836   | 221. 189647  | 836. 034 | 14021867. 88 |
| M221T721   | 221. 1893656 | 720. 704 | 29878061. 03 |
| M221T701   | 221. 1896566 | 700. 758 | 75007067. 42 |
| M221T669   | 221. 1896271 | 668. 867 | 23099270. 82 |
| M221T680   | 221. 189622  | 680. 402 | 38098203. 49 |
| M221T500   | 221. 1896174 | 500. 045 | 5692674. 892 |
| M221T647   | 221. 1888496 | 646. 794 | 17945912. 35 |
| M221T789   | 221. 1888588 | 789. 293 | 25619589. 07 |
| M221T562   | 221. 1886279 | 561. 955 | 132439960    |
| M221T827   | 221. 1886636 | 827. 271 | 11024937. 07 |

|            |              |          |              |
|------------|--------------|----------|--------------|
| M221T820   | 221. 1887365 | 819. 78  | 19110310. 29 |
| M221T739   | 221. 1896035 | 738. 697 | 32733550. 9  |
| M221T758   | 221. 1887215 | 758. 236 | 52722807. 67 |
| M221T545   | 221. 1895969 | 545. 203 | 31327499. 17 |
| M221T576   | 221. 1896862 | 575. 878 | 16799684. 87 |
| M221T595   | 221. 1894094 | 595. 066 | 17024884. 51 |
| M221T802   | 221. 1888639 | 801. 685 | 21318773. 59 |
| M222T455   | 221. 5725472 | 454. 739 | 2783235. 131 |
| M222T779   | 221. 6210449 | 778. 543 | 2399687. 603 |
| M222T132   | 221. 9449255 | 131. 949 | 788705. 7058 |
| M222T794   | 221. 9932017 | 793. 649 | 7578139. 26  |
| M222T830   | 221. 9930218 | 830. 193 | 7434672. 76  |
| M222T787   | 221. 9936443 | 786. 569 | 6772371. 561 |
| M222T733   | 221. 993321  | 732. 773 | 4789727. 619 |
| M222T823   | 221. 9930327 | 822. 881 | 9456332. 912 |
| M222T803   | 221. 9931248 | 802. 88  | 7964125. 849 |
| M222T297   | 222. 0681738 | 296. 739 | 687555. 5296 |
| M222T453   | 222. 0755414 | 453. 317 | 7055477. 746 |
| M222T469   | 222. 0759639 | 469. 252 | 23097902. 84 |
| M222T604   | 222. 0752505 | 603. 95  | 5566917. 178 |
| M222T389_1 | 222. 0752398 | 389. 035 | 9511428. 233 |
| M222T253   | 222. 0733257 | 253. 024 | 3475070. 569 |
| M222T346   | 222. 0753665 | 345. 848 | 9519517. 993 |
| M222T316   | 222. 0754098 | 315. 701 | 5622735. 362 |
| M222T361   | 222. 0754148 | 360. 794 | 5265837. 198 |
| M222T305   | 222. 0756507 | 304. 777 | 4349532. 632 |
| M222T525   | 222. 0756102 | 525. 132 | 7200295. 547 |
| M222T94    | 222. 0960005 | 93. 7378 | 108187007. 3 |
| M222T100   | 222. 0963741 | 100. 146 | 114840135. 6 |
| M222T203   | 222. 097766  | 203. 36  | 6738991. 393 |
| M222T87    | 222. 0964758 | 86. 6643 | 30180305. 43 |
| M222T143   | 222. 0964757 | 142. 85  | 29241040. 04 |
| M222T309   | 222. 111924  | 308. 967 | 5284226. 21  |
| M222T302   | 222. 1097684 | 302. 191 | 4114600. 971 |
| M222T626   | 222. 1113342 | 626. 042 | 34376533. 43 |
| M222T554   | 222. 1116725 | 553. 936 | 4471079. 049 |
| M222T616   | 222. 1113389 | 615. 594 | 8404820. 887 |
| M222T389_2 | 222. 1117537 | 389. 035 | 5680853. 954 |
| M222T381   | 222. 1113185 | 380. 63  | 13876347. 13 |
| M222T751   | 222. 1116684 | 751. 333 | 7925979. 942 |
| M222T543   | 222. 111663  | 542. 766 | 4541328. 646 |
| M222T318_1 | 222. 1099647 | 318. 497 | 6991831. 026 |
| M222T761   | 222. 1117617 | 760. 916 | 5382607. 56  |
| M222T405   | 222. 123099  | 404. 872 | 8351139. 012 |
| M222T422   | 222. 1232356 | 421. 784 | 15963947. 38 |
| M222T445   | 222. 1231744 | 444. 725 | 10433294. 73 |
| M222T318_2 | 222. 1231485 | 318. 497 | 6309822. 239 |
| M222T158   | 222. 1329034 | 157. 773 | 5894779. 363 |
| M222T104   | 222. 132902  | 104. 493 | 10003322. 55 |
| M222T436   | 222. 1486164 | 436. 069 | 5782839. 772 |
| M222T555   | 222. 14835   | 555. 358 | 812254. 0834 |
| M222T834   | 222. 14779   | 834. 486 | 11167956. 29 |
| M222T655   | 222. 1460547 | 654. 542 | 14002178. 45 |
| M222T623   | 222. 1864211 | 623. 11  | 126651327. 7 |

|            |              |          |              |
|------------|--------------|----------|--------------|
| M222T562   | 222. 1926533 | 561. 955 | 17187686. 62 |
| M222T758   | 222. 192605  | 758. 236 | 5794053. 54  |
| M222T694   | 222. 1926241 | 693. 81  | 15179469. 77 |
| M223T832   | 222. 6151002 | 831. 709 | 896948. 5463 |
| M223T81    | 223. 0221905 | 80. 824  | 32378034. 09 |
| M223T456   | 223. 0593232 | 456. 126 | 5966642. 945 |
| M223T119   | 223. 0588941 | 119. 433 | 30596918. 46 |
| M223T538   | 223. 0593884 | 538. 316 | 8322573. 914 |
| M223T180   | 223. 059168  | 179. 75  | 27987937. 76 |
| M223T293   | 223. 0591703 | 292. 623 | 87317374. 64 |
| M223T106   | 223. 0591454 | 105. 503 | 158192100. 1 |
| M223T554   | 223. 0592473 | 553. 936 | 15455137     |
| M223T545   | 223. 0594032 | 545. 203 | 13505303. 68 |
| M223T264   | 223. 0585504 | 264. 079 | 18623586. 19 |
| M223T651   | 223. 0597285 | 650. 898 | 5734396. 025 |
| M223T620   | 223. 0589172 | 620. 172 | 8349406. 24  |
| M223T152   | 223. 0591226 | 152. 375 | 99953225. 52 |
| M223T93    | 223. 0600153 | 92. 7272 | 32835953. 1  |
| M223T188_1 | 223. 0589618 | 188. 126 | 35367594. 93 |
| M223T237   | 223. 0599722 | 237. 171 | 30223316. 47 |
| M223T209   | 223. 0571397 | 208. 905 | 31401307. 59 |
| M223T31    | 223. 0618636 | 31. 4047 | 11137081. 61 |
| M223T510   | 223. 0604329 | 510. 333 | 83323628. 05 |
| M223T765   | 223. 0628663 | 765. 406 | 7568097. 325 |
| M223T70    | 223. 064805  | 70. 3428 | 6637097. 264 |
| M223T323   | 223. 0707688 | 322. 536 | 54808121. 28 |
| M223T794   | 223. 0958142 | 793. 649 | 7650504. 822 |
| M223T39    | 223. 0956139 | 39. 4128 | 2011509. 829 |
| M223T709   | 223. 095826  | 709. 106 | 4466304. 695 |
| M223T94    | 223. 091852  | 93. 7378 | 10662143. 51 |
| M223T87    | 223. 0992404 | 86. 6643 | 12825824. 69 |
| M223T351   | 223. 1074757 | 351. 348 | 27008757. 64 |
| M223T147   | 223. 1073916 | 146. 742 | 15911268. 85 |
| M223T367   | 223. 1067514 | 366. 514 | 14845463. 72 |
| M223T398   | 223. 1070838 | 397. 878 | 28101211. 67 |
| M223T378   | 223. 1076111 | 377. 704 | 3255650. 727 |
| M223T109   | 223. 1067463 | 108. 698 | 33433782. 68 |
| M223T341   | 223. 1074829 | 340. 548 | 16722327. 61 |
| M223T198   | 223. 1069654 | 198. 072 | 17630737. 85 |
| M223T211_1 | 223. 1070951 | 211. 288 | 18298063. 48 |
| M223T60    | 223. 1320349 | 59. 9075 | 4228942. 436 |
| M223T163   | 223. 1287388 | 162. 728 | 8245725. 967 |
| M223T283   | 223. 1286264 | 282. 886 | 15357562. 8  |
| M223T271   | 223. 128677  | 270. 983 | 7461674. 828 |
| M223T108   | 223. 1285924 | 107. 537 | 18591765. 36 |
| M223T42    | 223. 1321042 | 41. 798  | 5037636. 785 |
| M223T188_2 | 223. 128507  | 188. 126 | 8844141. 793 |
| M223T567   | 223. 1318436 | 567. 1   | 4561802. 195 |
| M223T372   | 223. 1434852 | 372. 152 | 4463097. 22  |
| M223T477   | 223. 1434244 | 476. 554 | 15594621. 7  |
| M223T487   | 223. 143408  | 486. 885 | 23373255. 48 |
| M223T361   | 223. 143457  | 360. 794 | 4916866. 857 |
| M223T402   | 223. 143482  | 401. 963 | 4359109. 601 |
| M223T211_2 | 223. 154428  | 211. 288 | 1759945. 17  |



|            |              |          |              |
|------------|--------------|----------|--------------|
| M223T746   | 223. 1684071 | 745. 603 | 4964651. 16  |
| M223T764   | 223. 1684234 | 763. 856 | 6574210. 813 |
| M223T604   | 223. 1686382 | 603. 95  | 5050933. 664 |
| M223T768   | 223. 2049983 | 768. 166 | 4392943. 785 |
| M224T325   | 223. 533615  | 325. 35  | 9000987. 105 |
| M224T127   | 223. 5514185 | 126. 785 | 1300708. 673 |
| M224T287   | 223. 6327824 | 287. 148 | 4037700. 482 |
| M224T767   | 223. 9847178 | 766. 742 | 266522842. 9 |
| M224T809   | 223. 9871169 | 808. 678 | 398785189. 3 |
| M224T788   | 223. 9856515 | 787. 856 | 327544124. 4 |
| M224T75    | 223. 9876376 | 74. 9588 | 461437529. 4 |
| M224T731   | 223. 9864054 | 731. 347 | 237506168. 9 |
| M224T32    | 223. 9874255 | 32. 4171 | 86772186. 76 |
| M224T56    | 223. 98754   | 56. 1096 | 67016729. 39 |
| M224T826   | 223. 9863249 | 825. 74  | 267398992. 7 |
| M224T60    | 224. 0109984 | 59. 9075 | 2669247. 046 |
| M224T794   | 224. 0104253 | 793. 649 | 8003678. 431 |
| M224T770   | 224. 0102928 | 769. 702 | 21482743. 04 |
| M224T754   | 224. 0103074 | 753. 987 | 27886157. 92 |
| M224T33    | 224. 0109472 | 33. 467  | 19178587. 74 |
| M224T776   | 224. 0116391 | 776. 194 | 20010537. 74 |
| M224T747   | 224. 0102432 | 746. 977 | 29696599. 95 |
| M224T813   | 224. 0104533 | 812. 862 | 6422328. 517 |
| M224T804   | 224. 0103125 | 804. 327 | 12122547. 58 |
| M224T787   | 224. 0102309 | 786. 569 | 21545322. 98 |
| M224T761   | 224. 0102651 | 760. 916 | 29733757. 84 |
| M224T739   | 224. 0101799 | 738. 697 | 38059353. 42 |
| M224T832   | 224. 0105068 | 831. 709 | 5152050. 735 |
| M224T69    | 224. 0108778 | 69. 2834 | 1300541. 732 |
| M224T49    | 224. 0110768 | 48. 7362 | 3279973. 391 |
| M224T715   | 224. 0117009 | 715. 011 | 52012486. 17 |
| M224T694   | 224. 0116359 | 693. 81  | 30044723. 31 |
| M224T823   | 224. 0104005 | 822. 881 | 8113599. 763 |
| M224T730   | 224. 0102606 | 729. 798 | 41133294. 28 |
| M224T369   | 224. 0543415 | 369. 321 | 31776772. 32 |
| M224T243   | 224. 0543346 | 242. 682 | 3151250. 756 |
| M224T253_1 | 224. 0519085 | 253. 024 | 3129585. 465 |
| M224T493   | 224. 0588669 | 492. 895 | 3864264. 503 |
| M224T293   | 224. 0622734 | 292. 623 | 8311222. 214 |
| M224T104   | 224. 058296  | 104. 493 | 30931579. 24 |
| M224T164_1 | 224. 0766105 | 163. 846 | 2579841. 343 |
| M224T332   | 224. 0748961 | 332. 2   | 22120623. 26 |
| M224T139   | 224. 0757542 | 138. 766 | 5108004. 03  |
| M224T324   | 224. 0771002 | 323. 984 | 40792357. 1  |
| M224T497   | 224. 090919  | 497. 214 | 19003495. 35 |
| M224T190   | 224. 0923833 | 189. 571 | 32750808. 31 |
| M224T283   | 224. 092108  | 282. 886 | 20522914. 85 |
| M224T418   | 224. 0904579 | 417. 676 | 15275928. 93 |
| M224T572   | 224. 0909357 | 571. 523 | 4993975. 448 |
| M224T533   | 224. 0906903 | 532. 526 | 8913572. 473 |
| M224T471   | 224. 0920534 | 470. 602 | 34950135. 71 |
| M224T354   | 224. 0924857 | 353. 978 | 36473013. 06 |
| M224T164_2 | 224. 1019684 | 163. 846 | 3778828. 564 |
| M224T329   | 224. 10215   | 329. 481 | 5890916. 007 |

|            |              |          |              |
|------------|--------------|----------|--------------|
| M224T361   | 224. 102043  | 360. 794 | 6418943. 1   |
| M224T206   | 224. 1117326 | 205. 903 | 1268267. 175 |
| M224T87    | 224. 1109664 | 86. 6643 | 383411253. 6 |
| M224T348   | 224. 1271462 | 348. 488 | 9075409. 213 |
| M224T743   | 224. 1267186 | 742. 68  | 7750553. 507 |
| M224T306   | 224. 1283811 | 306. 247 | 16071376. 86 |
| M224T388   | 224. 1274864 | 387. 763 | 3460965. 915 |
| M224T491   | 224. 1279041 | 491. 373 | 5483064. 907 |
| M224T194   | 224. 1275149 | 193. 823 | 5632656. 971 |
| M224T549   | 224. 1273305 | 549. 375 | 2272873. 654 |
| M224T261   | 224. 127521  | 261. 177 | 4330655. 827 |
| M224T408   | 224. 1382374 | 407. 724 | 15048495. 53 |
| M224T385   | 224. 1385587 | 385. 081 | 14491071. 47 |
| M224T253_2 | 224. 1481641 | 253. 024 | 3985980. 931 |
| M224T488   | 224. 1584189 | 488. 437 | 3929393. 611 |
| M224T728   | 224. 1873135 | 728. 25  | 1695710. 469 |
| M224T318   | 224. 4736453 | 318. 497 | 6288303. 562 |
| M225T237   | 224. 9786962 | 237. 171 | 496392. 9783 |
| M225T57    | 224. 9871294 | 57. 4179 | 3401878. 691 |
| M225T250   | 224. 9867833 | 250. 144 | 5103226. 643 |
| M225T43    | 224. 9869512 | 43. 0471 | 7291475. 062 |
| M225T321   | 224. 9867545 | 321. 198 | 6592095. 39  |
| M225T74    | 224. 9891926 | 73. 8324 | 102384482. 1 |
| M225T811   | 224. 9898267 | 811. 413 | 56769012. 85 |
| M225T765   | 224. 9897986 | 765. 406 | 10202570. 93 |
| M225T32    | 224. 987851  | 32. 4171 | 7814046. 778 |
| M225T757   | 224. 9897373 | 757. 001 | 10737936. 27 |
| M225T787   | 224. 9898411 | 786. 569 | 29472669     |
| M225T744   | 224. 9898534 | 744. 182 | 6405713. 145 |
| M225T91    | 225. 0149062 | 90. 7088 | 17052636. 06 |
| M225T36    | 225. 0280652 | 35. 8675 | 27695803. 31 |
| M225T665   | 225. 0285271 | 664. 745 | 16843995. 53 |
| M225T639   | 225. 0281687 | 639. 219 | 46910695. 86 |
| M225T711   | 225. 0287131 | 710. 534 | 27380789. 68 |
| M225T570   | 225. 0295472 | 570. 01  | 12161091. 12 |
| M225T690   | 225. 0285299 | 689. 5   | 63759160. 54 |
| M225T420   | 225. 0751315 | 420. 274 | 17778496. 11 |
| M225T535   | 225. 0733651 | 535. 329 | 16261297. 96 |
| M225T106_1 | 225. 0748837 | 105. 503 | 26450787. 37 |
| M225T291   | 225. 0746951 | 291. 307 | 14711591. 69 |
| M225T396   | 225. 0748048 | 396. 415 | 3422500. 071 |
| M225T168   | 225. 0860738 | 167. 804 | 5323426. 89  |
| M225T87    | 225. 0859953 | 86. 6643 | 36224917. 25 |
| M225T104   | 225. 0859665 | 104. 493 | 14897668. 81 |
| M225T230   | 225. 0973494 | 230. 321 | 5885163. 524 |
| M225T471   | 225. 0946915 | 470. 602 | 3368126. 882 |
| M225T482   | 225. 0977985 | 482. 436 | 2948176. 407 |
| M225T354   | 225. 0942189 | 353. 978 | 3405746. 025 |
| M225T816   | 225. 1074626 | 815. 517 | 6810181. 549 |
| M225T708   | 225. 1078111 | 707. 557 | 4746507. 27  |
| M225T740   | 225. 1079055 | 740. 014 | 4233635. 1   |
| M225T504   | 225. 1117967 | 504. 466 | 5752919. 463 |
| M225T595   | 225. 1115806 | 595. 066 | 3807001. 502 |
| M225T309   | 225. 1225673 | 308. 967 | 9483973. 176 |

|            |              |          |              |
|------------|--------------|----------|--------------|
| M225T392   | 225. 1224    | 391. 678 | 27023930. 85 |
| M225T325   | 225. 1225527 | 325. 35  | 16410851. 26 |
| M225T680   | 225. 1192989 | 680. 402 | 8344692. 816 |
| M225T86    | 225. 1169414 | 85. 6453 | 20672050. 11 |
| M225T106_2 | 225. 122399  | 105. 503 | 26504476. 41 |
| M225T94    | 225. 1224059 | 93. 7378 | 44570816. 16 |
| M225T425   | 225. 1220389 | 424. 572 | 15827804. 35 |
| M225T353   | 225. 1258609 | 352. 65  | 13481840. 02 |
| M225T416   | 225. 1228501 | 416. 239 | 11814419. 26 |
| M225T737   | 225. 1189575 | 737. 198 | 4984962. 563 |
| M225T316   | 225. 1342931 | 315. 701 | 6064191. 183 |
| M225T384   | 225. 1332801 | 383. 536 | 139919474. 8 |
| M225T38    | 225. 1473868 | 38. 3208 | 5837886. 803 |
| M225T451   | 225. 1478562 | 450. 503 | 5514041. 969 |
| M225T775   | 225. 1476708 | 774. 919 | 10515207. 59 |
| M225T63    | 225. 1476061 | 63. 4448 | 3083478. 053 |
| M225T613   | 225. 1479729 | 612. 699 | 8526631. 74  |
| M225T568   | 225. 1474389 | 568. 464 | 5882737. 023 |
| M225T50    | 225. 1477598 | 50. 041  | 3752045. 243 |
| M225T583   | 225. 1476885 | 583. 068 | 5379879. 244 |
| M225T597   | 225. 1476639 | 596. 628 | 9906788. 842 |
| M226T36    | 225. 988343  | 35. 8675 | 6668015. 14  |
| M226T833   | 225. 9859147 | 833. 029 | 4554709. 557 |
| M226T818   | 225. 9859818 | 818. 418 | 6554052. 221 |
| M226T75    | 225. 985991  | 74. 9588 | 124364009. 3 |
| M226T55    | 225. 9862702 | 54. 867  | 1831808. 452 |
| M226T765   | 226. 0112276 | 765. 406 | 105643884. 1 |
| M226T747   | 226. 0120812 | 746. 977 | 32230721. 88 |
| M226T792   | 226. 0110075 | 792. 146 | 230547650. 9 |
| M226T730   | 226. 012234  | 729. 798 | 93349141. 9  |
| M226T331   | 226. 0224316 | 330. 809 | 5330705. 154 |
| M226T359   | 226. 0539458 | 359. 32  | 21908108. 17 |
| M226T567   | 226. 0554148 | 567. 1   | 1250651. 971 |
| M226T456   | 226. 0707302 | 456. 126 | 8778901. 704 |
| M226T369   | 226. 0704547 | 369. 321 | 16661822. 78 |
| M226T171   | 226. 071187  | 170. 665 | 218398342. 2 |
| M226T154   | 226. 0697333 | 153. 785 | 44210631. 42 |
| M226T131   | 226. 0701316 | 130. 668 | 12773202. 48 |
| M226T385   | 226. 0704673 | 385. 081 | 20030241. 59 |
| M226T276   | 226. 0701849 | 276. 414 | 5457551. 83  |
| M226T261   | 226. 0700933 | 261. 177 | 10783394. 45 |
| M226T603   | 226. 0804497 | 602. 513 | 1887812. 392 |
| M226T280   | 226. 0813608 | 280. 345 | 70612968. 17 |
| M226T150   | 226. 0910156 | 149. 65  | 15391076. 09 |
| M226T600   | 226. 1062832 | 599. 621 | 6498425. 707 |
| M226T353   | 226. 1086855 | 352. 65  | 15627390     |
| M226T102   | 226. 1066567 | 102. 247 | 173053899    |
| M226T708_1 | 226. 1077048 | 707. 557 | 5535365. 359 |
| M226T416   | 226. 1067268 | 416. 239 | 9856715. 534 |
| M226T574   | 226. 1063018 | 574. 363 | 5352915. 253 |
| M226T225   | 226. 1067254 | 224. 729 | 54827243. 42 |
| M226T180   | 226. 1084458 | 179. 75  | 12598493. 76 |
| M226T334   | 226. 1066943 | 333. 715 | 11700373. 86 |
| M226T297   | 226. 1087291 | 296. 739 | 20086240. 3  |

|            |              |          |              |
|------------|--------------|----------|--------------|
| M226T143   | 226. 1066665 | 142. 85  | 10177546. 65 |
| M226T816   | 226. 1075514 | 815. 517 | 27789580. 08 |
| M226T685   | 226. 1063059 | 684. 985 | 4585667. 853 |
| M226T592   | 226. 1063192 | 592. 067 | 5369097. 36  |
| M226T314   | 226. 118016  | 314. 259 | 19279940. 6  |
| M226T190   | 226. 1179763 | 189. 571 | 16769967. 18 |
| M226T210   | 226. 1178989 | 210. 186 | 15714100. 29 |
| M226T362   | 226. 1180164 | 362. 146 | 32519502. 37 |
| M226T371   | 226. 1179619 | 370. 777 | 27184795. 02 |
| M226T708_2 | 226. 126851  | 707. 557 | 65861574. 41 |
| M226T748   | 226. 1268346 | 748. 486 | 23572566. 54 |
| M226T335   | 226. 1180106 | 334. 966 | 42790935. 1  |
| M226T94    | 226. 1271376 | 93. 7378 | 101714037. 1 |
| M226T760   | 226. 1268357 | 759. 605 | 14914554. 84 |
| M226T737   | 226. 1268596 | 737. 198 | 28389458. 31 |
| M226T113   | 226. 127686  | 112. 781 | 10509487. 83 |
| M226T301   | 226. 1281859 | 300. 782 | 1620623. 79  |
| M226T342   | 226. 1359638 | 341. 802 | 13714450. 92 |
| M226T610   | 226. 1425989 | 609. 592 | 12142590. 75 |
| M226T291   | 226. 1539296 | 291. 307 | 79238916. 93 |
| M226T697   | 226. 1780775 | 696. 575 | 112125412. 8 |
| M227T359   | 226. 5559133 | 359. 32  | 3983965. 283 |
| M227T334   | 226. 6098655 | 333. 715 | 2123456. 696 |
| M227T708   | 226. 6288147 | 707. 557 | 13573154. 44 |
| M227T210   | 226. 9656924 | 210. 186 | 2225302. 724 |
| M227T351   | 226. 9851346 | 351. 348 | 2223114. 859 |
| M227T239   | 227. 0520389 | 238. 605 | 1723445. 418 |
| M227T284   | 227. 0547376 | 284. 377 | 7528193. 58  |
| M227T321   | 227. 0665299 | 321. 198 | 4081138. 461 |
| M227T180   | 227. 0733152 | 179. 75  | 8315712. 081 |
| M227T171   | 227. 0735599 | 170. 665 | 12199348. 49 |
| M227T466   | 227. 0800408 | 466. 162 | 10796507. 71 |
| M227T280   | 227. 0843999 | 280. 345 | 6174572. 425 |
| M227T325   | 227. 0905203 | 325. 35  | 7208511. 579 |
| M227T214   | 227. 0906585 | 213. 872 | 5993023. 135 |
| M227T502   | 227. 0903968 | 501. 549 | 4854561. 013 |
| M227T301   | 227. 0906197 | 300. 782 | 3683177. 163 |
| M227T209   | 227. 101976  | 208. 905 | 21239875. 59 |
| M227T472   | 227. 0986471 | 472. 132 | 32288021. 65 |
| M227T106   | 227. 101767  | 105. 503 | 8926551. 117 |
| M227T250   | 227. 1018365 | 250. 144 | 11188942. 29 |
| M227T168   | 227. 1018136 | 167. 804 | 7623705. 583 |
| M227T357   | 227. 1016639 | 356. 74  | 73966291. 41 |
| M227T317   | 227. 1025005 | 317. 199 | 8660648. 487 |
| M227T386   | 227. 1022083 | 386. 352 | 8515957. 335 |
| M227T814   | 227. 1060382 | 814. 095 | 10155202. 33 |
| M227T298_1 | 227. 1082138 | 298. 135 | 14324875. 99 |
| M227T335   | 227. 1227149 | 334. 966 | 4570600. 064 |
| M227T544   | 227. 1249548 | 544. 056 | 8671688. 838 |
| M227T451   | 227. 127033  | 450. 503 | 6926421. 774 |
| M227T666   | 227. 1270562 | 666. 137 | 35001735. 61 |
| M227T580   | 227. 1270226 | 580. 22  | 10996217. 98 |
| M227T604   | 227. 127441  | 603. 95  | 29430575. 03 |
| M227T728   | 227. 1274543 | 728. 25  | 6609525. 998 |

|            |              |          |              |
|------------|--------------|----------|--------------|
| M227T568   | 227. 126931  | 568. 464 | 6290935. 539 |
| M227T185   | 227. 1382853 | 185. 398 | 9275458. 277 |
| M227T355   | 227. 1381753 | 355. 41  | 9085296. 892 |
| M227T408   | 227. 1380085 | 407. 724 | 4977755. 391 |
| M227T427   | 227. 1380365 | 427. 362 | 23925847. 09 |
| M227T338   | 227. 1384646 | 337. 767 | 6538728. 802 |
| M227T216   | 227. 1380178 | 216. 359 | 24859730. 28 |
| M227T104   | 227. 1378048 | 104. 493 | 71427738. 73 |
| M227T372   | 227. 1498116 | 372. 152 | 7236908. 369 |
| M227T310   | 227. 1496181 | 310. 075 | 6982853. 008 |
| M227T298_2 | 227. 1493889 | 298. 135 | 3567842. 426 |
| M227T291   | 227. 1607198 | 291. 307 | 5519803. 534 |
| M227T458   | 227. 1635283 | 457. 576 | 3937673. 918 |
| M227T567   | 227. 1631864 | 567. 1   | 4130695. 22  |
| M227T563   | 227. 1783797 | 563. 297 | 9507692. 86  |
| M227T697   | 227. 179713  | 696. 575 | 10224334. 74 |
| M227T832   | 227. 1995443 | 831. 709 | 2991679. 212 |
| M228T306   | 227. 6182878 | 306. 247 | 2056948. 504 |
| M228T452_1 | 227. 7671771 | 451. 804 | 1650912. 114 |
| M228T36    | 227. 9800125 | 35. 8675 | 55921104. 89 |
| M228T135   | 227. 9820305 | 134. 574 | 1781187. 461 |
| M228T176   | 227. 9972752 | 175. 952 | 20379394. 02 |
| M228T794_1 | 228. 00697   | 793. 649 | 15572603. 88 |
| M228T807   | 228. 0069905 | 807. 232 | 24907430. 46 |
| M228T733   | 228. 0070058 | 732. 773 | 36216718. 76 |
| M228T768   | 228. 006096  | 768. 166 | 26919039. 98 |
| M228T820_1 | 228. 0069263 | 819. 78  | 12493105. 2  |
| M228T784_1 | 228. 0072935 | 783. 78  | 21253688. 21 |
| M228T215   | 228. 0169087 | 215. 068 | 6351505. 473 |
| M228T163   | 228. 0314261 | 162. 728 | 13905983. 7  |
| M228T210   | 228. 0347435 | 210. 186 | 2640982. 041 |
| M228T321   | 228. 0442287 | 321. 198 | 2887608. 178 |
| M228T117   | 228. 0493011 | 116. 689 | 20702746. 77 |
| M228T100   | 228. 04887   | 100. 146 | 289257916. 9 |
| M228T357   | 228. 0486054 | 356. 74  | 76613725. 76 |
| M228T304_1 | 228. 0496972 | 303. 513 | 9464692. 682 |
| M228T254   | 228. 049429  | 254. 446 | 4976597. 966 |
| M228T369   | 228. 0681296 | 369. 321 | 5933628. 627 |
| M228T478   | 228. 0640624 | 477. 989 | 18534047. 34 |
| M228T439   | 228. 0857764 | 439. 021 | 59886268. 96 |
| M228T294   | 228. 0857572 | 293. 896 | 17450269. 9  |
| M228T167   | 228. 0859554 | 166. 613 | 37947212. 81 |
| M228T418_1 | 228. 0857415 | 417. 676 | 43426550. 68 |
| M228T143   | 228. 0858646 | 142. 85  | 13157263. 55 |
| M228T401   | 228. 0858023 | 400. 59  | 18821149. 41 |
| M228T485   | 228. 0874886 | 485. 471 | 5089871. 127 |
| M228T93    | 228. 0859254 | 92. 7272 | 51741657. 75 |
| M228T104   | 228. 0853571 | 104. 493 | 60806569. 36 |
| M228T379   | 228. 0857605 | 379. 194 | 17351922. 92 |
| M228T147   | 228. 0964528 | 146. 742 | 14785042. 35 |
| M228T165   | 228. 0974501 | 165. 217 | 28504245. 34 |
| M228T452_2 | 228. 1009345 | 451. 804 | 1214150. 713 |
| M228T107_1 | 228. 0968011 | 106. 513 | 16427190. 27 |
| M228T106   | 228. 122195  | 105. 503 | 14392179. 14 |

|            |              |          |              |
|------------|--------------|----------|--------------|
| M228T297   | 228. 1221499 | 296. 739 | 7181112. 876 |
| M228T604   | 228. 1222386 | 603. 95  | 3206175. 282 |
| M228T168   | 228. 1222395 | 167. 804 | 7468198. 563 |
| M228T121   | 228. 1221887 | 120. 525 | 4502645. 984 |
| M228T509   | 228. 1222389 | 508. 883 | 4773890. 327 |
| M228T591   | 228. 1222181 | 590. 607 | 2685898. 562 |
| M228T521   | 228. 1222208 | 520. 739 | 5797184. 945 |
| M228T156   | 228. 1222093 | 156. 393 | 7369610. 555 |
| M228T310   | 228. 1341035 | 310. 075 | 9227102. 014 |
| M228T304_2 | 228. 1336554 | 303. 513 | 5592958. 814 |
| M228T666   | 228. 1302252 | 666. 137 | 3207849. 21  |
| M228T345   | 228. 133369  | 344. 555 | 20774759. 4  |
| M228T389   | 228. 1332607 | 389. 035 | 9961944. 893 |
| M228T181   | 228. 1336586 | 181. 154 | 4677622. 941 |
| M228T381   | 228. 1332444 | 380. 63  | 20238095. 91 |
| M228T192   | 228. 1332989 | 192. 437 | 15678149. 81 |
| M228T218   | 228. 1333951 | 217. 866 | 10969840. 19 |
| M228T364   | 228. 1336391 | 363. 58  | 9960167. 587 |
| M228T92    | 228. 1434484 | 91. 7174 | 14954697. 02 |
| M228T107_2 | 228. 1451456 | 106. 513 | 13075064. 92 |
| M228T499   | 228. 1589096 | 498. 645 | 2305530. 647 |
| M228T418_2 | 228. 1589456 | 417. 676 | 2951087. 84  |
| M228T194   | 228. 1588239 | 193. 823 | 2444056. 293 |
| M228T313   | 228. 1703417 | 312. 85  | 10603017. 47 |
| M228T399   | 228. 1778689 | 399. 046 | 523675. 5691 |
| M228T794_2 | 228. 1921117 | 793. 649 | 24149118. 55 |
| M228T810   | 228. 1920421 | 810. 052 | 23760633. 88 |
| M228T800   | 228. 1921384 | 800. 484 | 21431249. 39 |
| M228T751   | 228. 1949202 | 751. 333 | 1667586198   |
| M228T832   | 228. 1921025 | 831. 709 | 23137973. 41 |
| M228T32    | 228. 1945549 | 32. 4171 | 3270238. 99  |
| M228T507   | 228. 1949347 | 507. 343 | 5511699. 245 |
| M228T820_2 | 228. 1920707 | 819. 78  | 20697549. 92 |
| M228T784_2 | 228. 1920199 | 783. 78  | 47598411. 67 |
| M228T809   | 228. 2317091 | 808. 678 | 3264457. 378 |
| M228T31    | 228. 2328731 | 31. 4047 | 3544118. 649 |
| M228T56    | 228. 2325273 | 56. 1096 | 8880996. 027 |
| M228T753   | 228. 3068743 | 752. 541 | 1406810. 525 |
| M229T36    | 228. 984955  | 35. 8675 | 3018035. 654 |
| M229T250   | 229. 0011801 | 250. 144 | 2298012. 574 |
| M229T475   | 229. 0275985 | 475. 007 | 3536948. 93  |
| M229T331   | 229. 0308778 | 330. 809 | 36524076. 61 |
| M229T682   | 229. 0600941 | 681. 885 | 2022446. 435 |
| M229T100   | 229. 0530715 | 100. 146 | 28512554. 34 |
| M229T583   | 229. 060172  | 583. 068 | 2870187. 116 |
| M229T263   | 229. 0695338 | 262. 529 | 16642149. 75 |
| M229T158_1 | 229. 0691511 | 157. 773 | 27350697. 46 |
| M229T190   | 229. 070667  | 189. 571 | 29087314. 22 |
| M229T293   | 229. 069116  | 292. 623 | 72418002. 78 |
| M229T649_1 | 229. 0695361 | 649. 338 | 7523049. 508 |
| M229T199   | 229. 0691652 | 199. 43  | 19376863. 53 |
| M229T143_1 | 229. 0707411 | 142. 85  | 32655913. 26 |
| M229T594   | 229. 0702691 | 593. 62  | 2683118. 528 |
| M229T210   | 229. 0691869 | 210. 186 | 19932592. 01 |

|            |              |          |              |
|------------|--------------|----------|--------------|
| M229T178   | 229. 069042  | 178. 408 | 29350255. 64 |
| M229T104   | 229. 0706935 | 104. 493 | 221932118. 5 |
| M229T270   | 229. 0810225 | 269. 528 | 2702714. 232 |
| M229T256   | 229. 0809457 | 255. 723 | 4079930. 728 |
| M229T237   | 229. 0812634 | 237. 171 | 6708132. 921 |
| M229T290   | 229. 0812089 | 289. 912 | 4905601. 507 |
| M229T438   | 229. 0926311 | 437. 571 | 6850277. 956 |
| M229T452   | 229. 0983314 | 451. 804 | 8321493. 757 |
| M229T311   | 229. 1179201 | 311. 445 | 91230244. 42 |
| M229T158_2 | 229. 1175527 | 157. 773 | 23713080. 19 |
| M229T355   | 229. 1172494 | 355. 41  | 26242360. 75 |
| M229T180   | 229. 1176211 | 179. 75  | 39201434. 55 |
| M229T420   | 229. 1175637 | 420. 274 | 25953992. 26 |
| M229T106   | 229. 1176714 | 105. 503 | 25506291. 13 |
| M229T143_2 | 229. 1176769 | 142. 85  | 19328457     |
| M229T336   | 229. 1177992 | 336. 344 | 14056532. 86 |
| M229T89    | 229. 117173  | 88. 6838 | 68844091. 89 |
| M229T205   | 229. 1287675 | 204. 747 | 13418887. 24 |
| M229T98    | 229. 1286791 | 97. 7824 | 205591952. 9 |
| M229T152   | 229. 1287302 | 152. 375 | 12451541. 51 |
| M229T767   | 229. 1424699 | 766. 742 | 10235921. 86 |
| M229T61    | 229. 1423409 | 61. 1538 | 9115141. 324 |
| M229T712   | 229. 1425672 | 711. 984 | 9231018. 197 |
| M229T685   | 229. 1422156 | 684. 985 | 37274032. 56 |
| M229T346   | 229. 1377921 | 345. 848 | 1231286. 038 |
| M229T798   | 229. 1426706 | 797. 773 | 6901025. 232 |
| M229T670   | 229. 1427035 | 670. 166 | 10256749. 14 |
| M229T570   | 229. 1427422 | 570. 01  | 3544333. 7   |
| M229T390   | 229. 1555084 | 390. 432 | 252842068. 3 |
| M229T171   | 229. 1541813 | 170. 665 | 96999227. 96 |
| M229T155   | 229. 1541756 | 155. 197 | 59710954. 45 |
| M229T751_1 | 229. 1789466 | 751. 333 | 23455479. 73 |
| M229T649_2 | 229. 1943536 | 649. 338 | 5876101. 848 |
| M229T702   | 229. 1945576 | 702. 055 | 10945921. 94 |
| M229T562   | 229. 1942928 | 561. 955 | 27800231. 59 |
| M229T751_2 | 229. 1961176 | 751. 333 | 222388259. 2 |
| M230T177   | 229. 9738892 | 177. 295 | 21887038. 6  |
| M230T119   | 229. 975851  | 119. 433 | 118549474. 9 |
| M230T233_1 | 229. 9891714 | 233. 081 | 525599. 9558 |
| M230T466   | 230. 0566604 | 466. 162 | 8284525. 707 |
| M230T161_1 | 230. 0649337 | 161. 494 | 8552721. 802 |
| M230T311   | 230. 0657299 | 311. 445 | 2849786. 611 |
| M230T222   | 230. 0653439 | 222. 017 | 1270343. 8   |
| M230T104_1 | 230. 0755862 | 104. 493 | 13869768. 68 |
| M230T184   | 230. 1001516 | 183. 886 | 99881359. 02 |
| M230T453   | 230. 1015167 | 453. 317 | 8216452. 281 |
| M230T161_2 | 230. 1013293 | 161. 494 | 65569411. 98 |
| M230T272   | 230. 100276  | 272. 304 | 200198416. 8 |
| M230T147   | 230. 1012829 | 146. 742 | 60426689. 14 |
| M230T293_1 | 230. 1001146 | 292. 623 | 398745426. 9 |
| M230T472   | 230. 1013198 | 472. 132 | 3934310. 233 |
| M230T252   | 230. 1012785 | 251. 555 | 219360522. 1 |
| M230T129   | 230. 1012826 | 129. 234 | 29591886. 26 |
| M230T260   | 230. 1003095 | 259. 74  | 187959142. 7 |

|            |              |          |              |
|------------|--------------|----------|--------------|
| M230T233_2 | 230. 1004652 | 233. 081 | 880477145. 2 |
| M230T302   | 230. 1002051 | 302. 191 | 260016448. 8 |
| M230T422   | 230. 099056  | 421. 784 | 11101927. 42 |
| M230T338   | 230. 1025019 | 337. 767 | 47519007. 24 |
| M230T316   | 230. 1013174 | 315. 701 | 90472787. 59 |
| M230T800   | 230. 1013262 | 800. 484 | 8702610. 645 |
| M230T104_2 | 230. 1013023 | 104. 493 | 83695061. 21 |
| M230T730_1 | 230. 1012139 | 729. 798 | 3273479. 324 |
| M230T374   | 230. 1041918 | 373. 532 | 18230191. 19 |
| M230T106   | 230. 1131387 | 105. 503 | 15488149. 33 |
| M230T415_1 | 230. 116438  | 414. 82  | 12550731. 86 |
| M230T181   | 230. 112443  | 181. 154 | 64081223. 15 |
| M230T171_1 | 230. 1128624 | 170. 665 | 7085674. 744 |
| M230T295   | 230. 1123959 | 295. 356 | 40458856. 33 |
| M230T195   | 230. 1124844 | 195. 23  | 181456151. 8 |
| M230T165   | 230. 1238138 | 165. 217 | 1641885. 946 |
| M230T310   | 230. 1233109 | 310. 075 | 10971187. 94 |
| M230T293_2 | 230. 1377731 | 292. 623 | 16172000. 33 |
| M230T388   | 230. 1381024 | 387. 763 | 5987614. 298 |
| M230T143   | 230. 1381713 | 142. 85  | 8317897. 19  |
| M230T342   | 230. 1377958 | 341. 802 | 10391610. 61 |
| M230T107   | 230. 1403133 | 106. 513 | 23001694. 08 |
| M230T321   | 230. 1492426 | 321. 198 | 10483297. 72 |
| M230T817   | 230. 1533606 | 816. 953 | 5192237. 852 |
| M230T390   | 230. 1573837 | 390. 432 | 28819681. 2  |
| M230T171_2 | 230. 1568451 | 170. 665 | 8014395. 895 |
| M230T649   | 230. 1740604 | 649. 338 | 8260174. 237 |
| M230T415_2 | 230. 1741571 | 414. 82  | 41731254. 75 |
| M230T345   | 230. 1743852 | 344. 555 | 3276713. 994 |
| M230T730_2 | 230. 174178  | 729. 798 | 6270607. 613 |
| M230T753   | 230. 1824059 | 752. 541 | 2186580. 061 |
| M231T568   | 230. 5936118 | 568. 464 | 3063064. 777 |
| M231T361   | 230. 6469358 | 360. 794 | 600365. 2056 |
| M231T55    | 230. 9452845 | 54. 867  | 7169502. 793 |
| M231T122   | 230. 9777197 | 122. 007 | 3049317. 238 |
| M231T252   | 230. 9803684 | 251. 555 | 2945389. 832 |
| M231T41    | 230. 9816894 | 40. 6031 | 2556311. 237 |
| M231T211   | 230. 9818208 | 211. 288 | 4441977. 973 |
| M231T148   | 230. 980699  | 148. 117 | 15672051. 86 |
| M231T164_1 | 230. 9894094 | 163. 846 | 162535127. 7 |
| M231T241   | 231. 0177162 | 241. 368 | 3362549. 673 |
| M231T150   | 231. 0466624 | 149. 65  | 8704018. 515 |
| M231T727   | 231. 0481811 | 726. 707 | 4728464. 857 |
| M231T574   | 231. 0490969 | 574. 363 | 7601766. 382 |
| M231T626   | 231. 0490912 | 626. 042 | 13911548. 79 |
| M231T652   | 231. 0492701 | 651. 956 | 155367952. 2 |
| M231T659   | 231. 0493038 | 658. 953 | 241833686. 7 |
| M231T706   | 231. 0489229 | 706. 229 | 41404355. 67 |
| M231T642   | 231. 0492023 | 642. 211 | 19022559. 26 |
| M231T215   | 231. 0493705 | 215. 068 | 5276141. 403 |
| M231T715   | 231. 0488835 | 715. 011 | 22739348. 82 |
| M231T677   | 231. 0492703 | 677. 376 | 37915315. 78 |
| M231T126   | 231. 0601781 | 125. 598 | 5853762. 872 |
| M231T320   | 231. 0607494 | 319. 758 | 1234685. 624 |



|            |              |          |              |
|------------|--------------|----------|--------------|
| M231T136   | 231. 0603874 | 135. 971 | 4388352. 182 |
| M231T711   | 231. 0850738 | 710. 534 | 12449955. 26 |
| M231T201   | 231. 0833459 | 200. 766 | 13821718. 32 |
| M231T347   | 231. 0851407 | 347. 175 | 4055787. 584 |
| M231T329   | 231. 0858634 | 329. 481 | 3722061. 1   |
| M231T102   | 231. 0965167 | 102. 247 | 53587300. 6  |
| M231T143   | 231. 0967618 | 142. 85  | 13386924. 93 |
| M231T172   | 231. 0963508 | 171. 935 | 4866507. 977 |
| M231T184   | 231. 1051826 | 183. 886 | 7647378. 028 |
| M231T294   | 231. 1050665 | 293. 896 | 38259734. 88 |
| M231T271   | 231. 1050224 | 270. 983 | 23405473. 24 |
| M231T286   | 231. 1051798 | 285. 9   | 19773301. 22 |
| M231T301   | 231. 1051326 | 300. 782 | 24236811. 73 |
| M231T233   | 231. 1050455 | 233. 081 | 92260344. 2  |
| M231T456   | 231. 1126023 | 456. 126 | 122311882. 6 |
| M231T466   | 231. 1126476 | 466. 162 | 55990070. 87 |
| M231T493   | 231. 1216771 | 492. 895 | 4502619. 528 |
| M231T181   | 231. 1159784 | 181. 154 | 3390707. 849 |
| M231T195   | 231. 1160242 | 195. 23  | 16518146. 14 |
| M231T202   | 231. 1326246 | 202. 149 | 15695021. 76 |
| M231T180   | 231. 1327427 | 179. 75  | 16850839. 02 |
| M231T616   | 231. 1372139 | 615. 594 | 2342238. 795 |
| M231T295   | 231. 1326303 | 295. 356 | 19948218. 67 |
| M231T396   | 231. 1338051 | 396. 415 | 2759132. 473 |
| M231T191   | 231. 1327326 | 190. 962 | 20671024. 4  |
| M231T803   | 231. 1359685 | 802. 88  | 36327229. 12 |
| M231T219   | 231. 1328301 | 219. 233 | 12149752. 6  |
| M231T287   | 231. 1444151 | 287. 148 | 9328320. 338 |
| M231T210   | 231. 1443647 | 210. 186 | 12164507. 56 |
| M231T258   | 231. 1443621 | 258. 489 | 12195593. 46 |
| M231T90    | 231. 1442538 | 89. 6999 | 248083157. 4 |
| M231T513   | 231. 159281  | 513. 285 | 2506688. 685 |
| M231T494   | 231. 1593158 | 494. 289 | 4995957. 694 |
| M231T392   | 231. 1693488 | 391. 678 | 89264224. 36 |
| M231T411   | 231. 1700953 | 410. 542 | 117440696    |
| M231T562_1 | 231. 1734745 | 561. 955 | 10430794. 12 |
| M231T164_2 | 231. 1809525 | 163. 846 | 5001024. 202 |
| M231T649   | 231. 210083  | 649. 338 | 7785606. 089 |
| M231T562_2 | 231. 209959  | 561. 955 | 11940303. 4  |
| M231T703   | 231. 210068  | 703. 35  | 7041630. 215 |
| M232T522   | 231. 6040925 | 522. 177 | 1755435. 653 |
| M232T310   | 231. 6499175 | 310. 075 | 1171288. 556 |
| M232T164_1 | 231. 9925744 | 163. 846 | 10144473. 2  |
| M232T82    | 231. 9872705 | 82. 0569 | 7988998. 194 |
| M232T122   | 232. 01233   | 122. 007 | 11547001. 2  |
| M232T113   | 232. 0124026 | 112. 781 | 7037038. 698 |
| M232T175   | 232. 0120769 | 174. 865 | 4959493. 432 |
| M232T332_1 | 232. 0201547 | 332. 2   | 3373787. 568 |
| M232T241   | 232. 0258445 | 241. 368 | 2313497. 814 |
| M232T659   | 232. 0525811 | 658. 953 | 23914232. 67 |
| M232T416   | 232. 0540347 | 416. 239 | 502662. 7742 |
| M232T623   | 232. 0600804 | 623. 11  | 2072717. 185 |
| M232T341   | 232. 0630788 | 340. 548 | 1490480. 129 |
| M232T136   | 232. 0645282 | 135. 971 | 5112394. 672 |

|            |              |          |              |
|------------|--------------|----------|--------------|
| M232T101_1 | 232. 0798813 | 101. 161 | 69656947. 14 |
| M232T332_2 | 232. 0808227 | 332. 2   | 7243747. 054 |
| M232T469   | 232. 0768725 | 469. 252 | 2122896. 108 |
| M232T165   | 232. 0793247 | 165. 217 | 164656430. 3 |
| M232T143_1 | 232. 0811417 | 142. 85  | 18038595. 57 |
| M232T198   | 232. 082004  | 198. 072 | 19950984. 93 |
| M232T332_3 | 232. 0955432 | 332. 2   | 26133943. 7  |
| M232T543   | 232. 0960452 | 542. 766 | 1112357. 63  |
| M232T402   | 232. 0962585 | 401. 963 | 4060515. 078 |
| M232T635   | 232. 096238  | 635. 022 | 3614036. 416 |
| M232T386   | 232. 0961814 | 386. 352 | 3227378. 843 |
| M232T87    | 232. 1037688 | 86. 6643 | 113839947. 9 |
| M232T295   | 232. 1063414 | 295. 356 | 3505639. 127 |
| M232T234   | 232. 1054495 | 234. 447 | 7882448. 704 |
| M232T99    | 232. 1171603 | 98. 9918 | 65252028. 06 |
| M232T104   | 232. 1171742 | 104. 493 | 92884490. 2  |
| M232T456   | 232. 1162043 | 456. 126 | 24606211. 39 |
| M232T164_2 | 232. 1172102 | 163. 846 | 36778071. 76 |
| M232T183   | 232. 1171392 | 182. 574 | 12462410. 9  |
| M232T367   | 232. 1177442 | 366. 514 | 20414821. 99 |
| M232T499   | 232. 1170685 | 498. 645 | 12171496. 52 |
| M232T143_2 | 232. 1172438 | 142. 85  | 21778038. 24 |
| M232T485   | 232. 1172719 | 485. 471 | 18145079. 75 |
| M232T123   | 232. 1172117 | 123. 262 | 20295032. 52 |
| M232T466   | 232. 1162784 | 466. 162 | 7839339. 664 |
| M232T448   | 232. 1175874 | 447. 531 | 10662672. 47 |
| M232T426   | 232. 1170668 | 425. 909 | 8722739. 421 |
| M232T293   | 232. 1171682 | 292. 623 | 6300600. 545 |
| M232T101_2 | 232. 1286137 | 101. 161 | 23536430. 25 |
| M232T215   | 232. 12804   | 215. 068 | 9529818. 458 |
| M232T190   | 232. 1407999 | 189. 571 | 23632755. 22 |
| M232T803   | 232. 1403083 | 802. 88  | 4847364. 108 |
| M232T90    | 232. 1438237 | 89. 6999 | 8998116. 318 |
| M232T432   | 232. 1538907 | 431. 64  | 2985352. 05  |
| M232T481   | 232. 1545839 | 481. 042 | 6206405. 454 |
| M232T502   | 232. 1541283 | 501. 549 | 4060129. 743 |
| M232T791   | 232. 1690521 | 790. 802 | 3992396. 991 |
| M233T165_1 | 232. 5208647 | 165. 217 | 10245598. 21 |
| M233T252   | 232. 5563648 | 251. 555 | 5799175. 01  |
| M233T163   | 232. 9875683 | 162. 728 | 9855644. 703 |
| M233T272   | 232. 9958414 | 272. 304 | 3933219. 104 |
| M233T218   | 232. 9960544 | 217. 866 | 8947599. 254 |
| M233T321   | 233. 0229037 | 321. 198 | 1452182. 784 |
| M233T122   | 233. 0624721 | 122. 007 | 13761946. 24 |
| M233T143_1 | 233. 0638275 | 142. 85  | 3348164. 411 |
| M233T143_2 | 233. 0759423 | 142. 85  | 13688263. 46 |
| M233T499   | 233. 0845185 | 498. 645 | 9858948. 979 |
| M233T165_2 | 233. 0842714 | 165. 217 | 12745654. 7  |
| M233T351   | 233. 0912767 | 351. 348 | 8435202. 587 |
| M233T531   | 233. 0910981 | 531. 127 | 5776637. 565 |
| M233T332   | 233. 1004271 | 332. 2   | 2366702. 991 |
| M233T203   | 233. 1022477 | 203. 36  | 13206501. 32 |
| M233T101   | 233. 1122868 | 101. 161 | 14455855. 28 |
| M233T282   | 233. 1124124 | 281. 666 | 5105866. 996 |

|          |              |          |              |
|----------|--------------|----------|--------------|
| M233T109 | 233. 1118213 | 108. 698 | 33896778. 44 |
| M233T172 | 233. 1123841 | 171. 935 | 8827719. 667 |
| M233T240 | 233. 112374  | 239. 913 | 5526526. 483 |
| M233T124 | 233. 1120128 | 124. 487 | 12104582. 62 |
| M233T222 | 233. 1122934 | 222. 017 | 11884900. 52 |
| M233T432 | 233. 1203175 | 431. 64  | 919309. 1538 |
| M233T88  | 233. 1232589 | 87. 6739 | 559339324. 3 |
| M233T395 | 233. 1278184 | 395. 264 | 6424651. 178 |
| M233T339 | 233. 1274691 | 339. 085 | 5563041. 705 |
| M233T361 | 233. 126687  | 360. 794 | 6784370. 656 |
| M233T385 | 233. 1275823 | 385. 081 | 3826181. 142 |
| M233T369 | 233. 1507325 | 369. 321 | 39865481. 87 |
| M233T701 | 233. 1536565 | 700. 758 | 3680671. 475 |
| M233T565 | 233. 1527743 | 564. 534 | 12311564. 29 |
| M233T225 | 233. 1485675 | 224. 729 | 23642731. 01 |
| M233T260 | 233. 1485496 | 259. 74  | 38370470. 84 |
| M233T692 | 233. 1537021 | 692. 461 | 11169242. 46 |
| M233T672 | 233. 1523176 | 671. 649 | 21195798. 27 |
| M233T652 | 233. 1521197 | 651. 956 | 30434780. 96 |
| M233T280 | 233. 1485727 | 280. 345 | 14458697. 67 |
| M233T562 | 233. 1892406 | 561. 955 | 30235907. 35 |
| M233T834 | 233. 1889977 | 834. 486 | 3407927. 919 |
| M234T309 | 233. 6194269 | 308. 967 | 10982019. 63 |
| M234T357 | 233. 8211378 | 356. 74  | 12161626. 04 |
| M234T121 | 233. 9448615 | 120. 525 | 10400842. 19 |
| M234T147 | 233. 9813709 | 146. 742 | 10015920. 17 |
| M234T176 | 234. 0566232 | 175. 952 | 43961834. 91 |
| M234T663 | 234. 0747639 | 663. 287 | 8258002. 022 |
| M234T558 | 234. 0755865 | 557. 967 | 5126411. 958 |
| M234T329 | 234. 0756309 | 329. 481 | 5101731. 375 |
| M234T605 | 234. 075554  | 605. 264 | 4159240. 278 |
| M234T535 | 234. 0751802 | 535. 329 | 23038966. 37 |
| M234T465 | 234. 0723281 | 464. 668 | 25609152. 92 |
| M234T385 | 234. 0751128 | 385. 081 | 8616676. 12  |
| M234T276 | 234. 075213  | 276. 414 | 2415871. 108 |
| M234T494 | 234. 0756082 | 494. 289 | 6531906. 528 |
| M234T301 | 234. 0858329 | 300. 782 | 25004574. 05 |
| M234T411 | 234. 0953597 | 410. 542 | 12433155. 8  |
| M234T325 | 234. 0963667 | 325. 35  | 7088674. 621 |
| M234T106 | 234. 0951953 | 105. 503 | 153194533. 3 |
| M234T143 | 234. 096063  | 142. 85  | 20208249. 98 |
| M234T210 | 234. 0977328 | 210. 186 | 7560610. 215 |
| M234T91  | 234. 0951288 | 90. 7088 | 1436215283   |
| M234T313 | 234. 096994  | 312. 85  | 5756111. 931 |
| M234T787 | 234. 1054753 | 786. 569 | 3077113      |
| M234T328 | 234. 1114794 | 328. 106 | 4692779. 619 |
| M234T708 | 234. 112369  | 707. 557 | 7750453. 372 |
| M234T739 | 234. 113007  | 738. 697 | 16255564. 93 |
| M234T317 | 234. 1120267 | 317. 199 | 24436743. 26 |
| M234T409 | 234. 1295085 | 409. 271 | 146719501. 8 |
| M234T418 | 234. 1294776 | 417. 676 | 14029498. 34 |
| M234T88  | 234. 1267033 | 87. 6739 | 43861363. 94 |
| M234T361 | 234. 1228331 | 360. 794 | 7978060. 808 |
| M234T144 | 234. 1325297 | 143. 959 | 15793767. 53 |

|            |              |          |              |
|------------|--------------|----------|--------------|
| M234T810   | 234. 1314927 | 810. 052 | 5400272. 538 |
| M234T117   | 234. 1336085 | 116. 689 | 34610803. 44 |
| M234T393   | 234. 1321653 | 392. 715 | 11100243908  |
| M234T458   | 234. 1315998 | 457. 576 | 4664414. 33  |
| M234T376   | 234. 1339796 | 376. 409 | 48689275. 03 |
| M234T104   | 234. 1320496 | 104. 493 | 399248640. 7 |
| M234T188   | 234. 1440072 | 188. 126 | 3566106. 398 |
| M234T369   | 234. 1513696 | 369. 321 | 5988246. 197 |
| M234T451   | 234. 1477967 | 450. 503 | 7424620. 455 |
| M234T260   | 234. 1519986 | 259. 74  | 3379392. 396 |
| M234T512   | 234. 1478755 | 511. 77  | 3641702. 386 |
| M234T78    | 234. 1801626 | 78. 3841 | 3581132. 563 |
| M234T394   | 234. 2460231 | 393. 934 | 5823749. 535 |
| M235T177   | 234. 5586782 | 177. 295 | 6237151. 215 |
| M235T777   | 234. 5975599 | 777. 245 | 3957486. 052 |
| M235T38    | 234. 9458723 | 38. 3208 | 21433244. 24 |
| M235T114   | 234. 9458377 | 114. 15  | 9910730. 383 |
| M235T68    | 234. 9459962 | 68. 0903 | 6011037. 234 |
| M235T133   | 234. 9458722 | 133. 259 | 19979759. 26 |
| M235T75    | 234. 9604983 | 74. 9588 | 45984011. 5  |
| M235T372   | 235. 0209466 | 372. 152 | 1532378. 004 |
| M235T119_1 | 235. 0287911 | 119. 433 | 23043978. 57 |
| M235T165   | 235. 037671  | 165. 217 | 1438357. 189 |
| M235T327   | 235. 0406953 | 326. 78  | 20797331. 74 |
| M235T84    | 235. 055187  | 83. 5661 | 143289974. 1 |
| M235T522   | 235. 0593713 | 522. 177 | 2390374. 551 |
| M235T293   | 235. 0594349 | 292. 623 | 15251712. 99 |
| M235T106_1 | 235. 059418  | 105. 503 | 34396405. 8  |
| M235T181   | 235. 0590135 | 181. 154 | 4421009. 787 |
| M235T613   | 235. 0594247 | 612. 699 | 10377388. 03 |
| M235T455   | 235. 0593874 | 454. 739 | 8694849. 493 |
| M235T657   | 235. 0593858 | 657. 451 | 5857962. 941 |
| M235T568   | 235. 0586996 | 568. 464 | 2959479. 513 |
| M235T403   | 235. 0594085 | 403. 447 | 6056639. 248 |
| M235T376_1 | 235. 0594935 | 376. 409 | 7471559. 797 |
| M235T354   | 235. 0595101 | 353. 978 | 6493029. 87  |
| M235T119_2 | 235. 080422  | 119. 433 | 31490216. 95 |
| M235T274   | 235. 0809795 | 273. 531 | 7657135. 253 |
| M235T106_2 | 235. 0804696 | 105. 503 | 35787830. 13 |
| M235T145   | 235. 080411  | 145. 382 | 61308797. 65 |
| M235T188   | 235. 0799238 | 188. 126 | 29850580. 13 |
| M235T399   | 235. 095708  | 399. 046 | 4542531. 194 |
| M235T425   | 235. 0960484 | 424. 572 | 3144917. 842 |
| M235T301   | 235. 0901897 | 300. 782 | 2450267. 697 |
| M235T91    | 235. 0995688 | 90. 7088 | 132462625. 2 |
| M235T413   | 235. 1075965 | 413. 295 | 12561989. 84 |
| M235T499   | 235. 1070753 | 498. 645 | 4928645. 584 |
| M235T350   | 235. 10665   | 349. 911 | 10269332. 27 |
| M235T323   | 235. 1065687 | 322. 536 | 10608793. 11 |
| M235T515   | 235. 1071237 | 514. 727 | 3991980. 202 |
| M235T440   | 235. 1073339 | 440. 459 | 5919510. 849 |
| M235T313   | 235. 1064735 | 312. 85  | 13844984. 16 |
| M235T205   | 235. 1172698 | 204. 747 | 41922690. 31 |
| M235T192   | 235. 1171967 | 192. 437 | 32325887. 18 |

|            |              |          |              |
|------------|--------------|----------|--------------|
| M235T747   | 235. 1135251 | 746. 977 | 8672830. 564 |
| M235T760   | 235. 1128191 | 759. 605 | 5351743. 242 |
| M235T737   | 235. 1128717 | 737. 198 | 8729342. 931 |
| M235T566   | 235. 1320794 | 565. 79  | 5038494. 304 |
| M235T197   | 235. 1277643 | 196. 644 | 97250921. 28 |
| M235T821_1 | 235. 1320248 | 821. 334 | 6505915. 985 |
| M235T393   | 235. 1363629 | 392. 715 | 1210876726   |
| M235T104   | 235. 1362554 | 104. 493 | 43992674. 29 |
| M235T376_2 | 235. 1431895 | 376. 409 | 23123831. 98 |
| M235T794   | 235. 1676695 | 793. 649 | 21649084. 55 |
| M235T725   | 235. 1692386 | 725. 212 | 15908536. 54 |
| M235T638   | 235. 1692405 | 637. 996 | 21324743. 86 |
| M235T806   | 235. 1676557 | 805. 823 | 32461374. 56 |
| M235T535   | 235. 1687363 | 535. 329 | 16424831. 8  |
| M235T787   | 235. 1680367 | 786. 569 | 31548593. 96 |
| M235T754   | 235. 1677245 | 753. 987 | 75429598. 39 |
| M235T832   | 235. 1692429 | 831. 709 | 12717716. 46 |
| M235T527   | 235. 1690823 | 526. 676 | 16056679. 07 |
| M235T821_2 | 235. 1676716 | 821. 334 | 15920695. 49 |
| M235T776   | 235. 1691483 | 776. 194 | 23359284. 83 |
| M235T562   | 235. 2048688 | 561. 955 | 7788991. 323 |
| M235T703   | 235. 2043519 | 703. 35  | 2075691. 455 |
| M235T426   | 235. 2048035 | 425. 909 | 1370633. 257 |
| M236T673   | 235. 5659994 | 672. 956 | 4897517. 839 |
| M236T777   | 235. 599774  | 777. 245 | 2322392. 269 |
| M236T211   | 235. 9609126 | 211. 288 | 4388666. 826 |
| M236T252   | 235. 9853854 | 251. 555 | 940165. 7998 |
| M236T84    | 236. 0589535 | 83. 5661 | 8176827. 378 |
| M236T144   | 236. 0760604 | 143. 959 | 15427873. 24 |
| M236T159   | 236. 0765603 | 159. 017 | 7540374. 511 |
| M236T209   | 236. 075227  | 208. 905 | 9360629. 508 |
| M236T456   | 236. 0901684 | 456. 126 | 9464750. 536 |
| M236T328   | 236. 0906658 | 328. 106 | 13172691. 27 |
| M236T147   | 236. 0907327 | 146. 742 | 8088654. 653 |
| M236T137   | 236. 0906876 | 137. 373 | 6619974. 906 |
| M236T241   | 236. 0905785 | 241. 368 | 3927393. 791 |
| M236T475   | 236. 089862  | 475. 007 | 9318333. 279 |
| M236T388   | 236. 0901084 | 387. 763 | 25650862. 78 |
| M236T378   | 236. 0900246 | 377. 704 | 19881197. 33 |
| M236T342   | 236. 0895946 | 341. 802 | 91967564. 78 |
| M236T425   | 236. 0915142 | 424. 572 | 16239239. 99 |
| M236T298   | 236. 0882193 | 298. 135 | 7589161. 337 |
| M236T198_1 | 236. 0905245 | 198. 072 | 19172231. 19 |
| M236T313   | 236. 0906008 | 312. 85  | 17251894. 08 |
| M236T354   | 236. 0899128 | 353. 978 | 46633531. 91 |
| M236T350   | 236. 1020335 | 349. 911 | 10143948. 93 |
| M236T332   | 236. 1019021 | 332. 2   | 4513922. 714 |
| M236T278   | 236. 102093  | 277. 699 | 2415477. 082 |
| M236T396   | 236. 101932  | 396. 415 | 8178995. 707 |
| M236T426   | 236. 1018465 | 425. 909 | 10051728. 81 |
| M236T100   | 236. 110582  | 100. 146 | 273415947. 6 |
| M236T145   | 236. 1131797 | 145. 382 | 5083479. 511 |
| M236T90    | 236. 1110145 | 89. 6999 | 217601600. 2 |
| M236T197_1 | 236. 1120782 | 196. 644 | 8049307. 609 |

|            |              |          |              |
|------------|--------------|----------|--------------|
| M236T155   | 236. 1131379 | 155. 197 | 5802667. 778 |
| M236T353   | 236. 1270104 | 352. 65  | 4551448. 598 |
| M236T408   | 236. 1277467 | 407. 724 | 5632797. 028 |
| M236T343   | 236. 1269035 | 343. 226 | 3527649. 45  |
| M236T706   | 236. 127644  | 706. 229 | 9703900. 194 |
| M236T197_2 | 236. 131114  | 196. 644 | 7870902. 615 |
| M236T327   | 236. 1290138 | 326. 78  | 6152502. 776 |
| M236T477   | 236. 1389623 | 476. 554 | 6370685. 024 |
| M236T393   | 236. 1366364 | 392. 715 | 124868691    |
| M236T104   | 236. 1474875 | 104. 493 | 214456428. 3 |
| M236T210   | 236. 1483818 | 210. 186 | 11777867. 64 |
| M236T171   | 236. 1484064 | 170. 665 | 52184699. 52 |
| M236T188   | 236. 1483042 | 188. 126 | 25647136. 82 |
| M236T198_2 | 236. 1483369 | 198. 072 | 20297676. 56 |
| M236T712   | 236. 1611792 | 711. 984 | 11064733. 31 |
| M236T591   | 236. 1663589 | 590. 607 | 5970881. 693 |
| M236T494   | 236. 1638349 | 494. 289 | 34864677. 36 |
| M236T638   | 236. 171627  | 637. 996 | 3282885. 506 |
| M236T535   | 236. 1718537 | 535. 329 | 1693040. 345 |
| M236T527   | 236. 1719196 | 526. 676 | 1958739. 874 |
| M236T724   | 236. 1999681 | 723. 682 | 1126548. 972 |
| M237T582   | 236. 584406  | 581. 625 | 6031185. 382 |
| M237T68_1  | 236. 9375739 | 68. 0903 | 1512032. 306 |
| M237T62    | 236. 9375216 | 62. 1777 | 3439119. 691 |
| M237T44    | 236. 9375346 | 44. 1485 | 7354559. 324 |
| M237T61    | 236. 9843439 | 61. 1538 | 5408141. 794 |
| M237T68_2  | 236. 9843311 | 68. 0903 | 1650660. 353 |
| M237T135   | 236. 9843446 | 134. 574 | 7497899. 303 |
| M237T42    | 236. 9843054 | 41. 798  | 5092006. 764 |
| M237T767   | 237. 0180998 | 766. 742 | 24615356. 21 |
| M237T829   | 237. 0199845 | 828. 73  | 10913466. 75 |
| M237T788   | 237. 018153  | 787. 856 | 61906182. 14 |
| M237T750   | 237. 0180432 | 749. 96  | 48761305. 6  |
| M237T820   | 237. 0198611 | 819. 78  | 14033852. 63 |
| M237T341   | 237. 0387741 | 340. 548 | 1680760. 994 |
| M237T84    | 237. 053609  | 83. 5661 | 10805737. 13 |
| M237T419   | 237. 0751643 | 418. 97  | 6100313. 112 |
| M237T572   | 237. 0765243 | 571. 523 | 19753171. 85 |
| M237T438   | 237. 0749976 | 437. 571 | 4996478. 536 |
| M237T411   | 237. 0855754 | 410. 542 | 9153981. 499 |
| M237T348_1 | 237. 0860638 | 348. 488 | 4658645. 572 |
| M237T310_1 | 237. 0863533 | 310. 075 | 5281366. 051 |
| M237T160   | 237. 0863394 | 160. 369 | 8143955. 38  |
| M237T336   | 237. 086462  | 336. 344 | 15442047. 48 |
| M237T214   | 237. 0863444 | 213. 872 | 29139823. 38 |
| M237T433   | 237. 0864351 | 433. 111 | 5033317. 762 |
| M237T240   | 237. 0855459 | 239. 913 | 32115427. 16 |
| M237T195   | 237. 086411  | 195. 23  | 8408358. 04  |
| M237T284   | 237. 0863959 | 284. 377 | 9308491. 895 |
| M237T350   | 237. 1053161 | 349. 911 | 1036657. 623 |
| M237T123   | 237. 10717   | 123. 262 | 5799937. 561 |
| M237T90    | 237. 1150144 | 89. 6999 | 22340086. 17 |
| M237T548   | 237. 1104059 | 548. 114 | 4429371. 255 |
| M237T100   | 237. 1153697 | 100. 146 | 25746345. 74 |

|            |              |          |              |
|------------|--------------|----------|--------------|
| M237T365   | 237. 1225263 | 365. 061 | 13523872. 88 |
| M237T375_1 | 237. 1232777 | 375. 021 | 15734461. 78 |
| M237T432   | 237. 1227593 | 431. 64  | 4361913. 166 |
| M237T207   | 237. 1228297 | 207. 393 | 4026878. 157 |
| M237T335   | 237. 1232628 | 334. 966 | 25691975. 09 |
| M237T403   | 237. 1227963 | 403. 447 | 39825049. 92 |
| M237T299_1 | 237. 1227163 | 299. 493 | 7308788. 155 |
| M237T318   | 237. 1232534 | 318. 497 | 25242109. 66 |
| M237T456   | 237. 1340403 | 456. 126 | 4580853. 721 |
| M237T230   | 237. 1340902 | 230. 321 | 9806648. 227 |
| M237T348_2 | 237. 1340412 | 348. 488 | 24939537. 94 |
| M237T375_2 | 237. 1340141 | 375. 021 | 8954804. 711 |
| M237T393   | 237. 1400545 | 392. 715 | 10992710. 54 |
| M237T405   | 237. 1339861 | 404. 872 | 32035093. 91 |
| M237T299_2 | 237. 1340513 | 299. 493 | 11377163. 57 |
| M237T698   | 237. 1470789 | 697. 952 | 3358127. 156 |
| M237T559   | 237. 1478667 | 559. 459 | 6328706. 49  |
| M237T589   | 237. 1478794 | 589. 053 | 5913844. 247 |
| M237T448   | 237. 1474297 | 447. 531 | 3796798. 067 |
| M237T310_2 | 237. 1608968 | 310. 075 | 15291926. 84 |
| M237T622   | 237. 1844374 | 621. 708 | 12480928. 38 |
| M237T680   | 237. 1845677 | 680. 402 | 16743054. 98 |
| M237T31    | 237. 1838903 | 31. 4047 | 1211269. 065 |
| M237T670   | 237. 1845584 | 670. 166 | 14303613. 83 |
| M237T811   | 237. 1846745 | 811. 413 | 54184358. 43 |
| M237T692   | 237. 1846685 | 692. 461 | 18684243. 3  |
| M237T310_3 | 237. 4955843 | 310. 075 | 5708488. 88  |
| M238T264   | 237. 5489272 | 264. 079 | 768138. 6824 |
| M238T777_1 | 237. 5986189 | 777. 245 | 42339663. 56 |
| M238T816   | 237. 6352878 | 815. 517 | 2357547. 343 |
| M238T540_1 | 237. 6508942 | 539. 764 | 7546313. 226 |
| M238T820   | 237. 6597948 | 819. 78  | 2090491. 47  |
| M238T827   | 237. 6597219 | 827. 271 | 5111303. 712 |
| M238T32    | 237. 6594469 | 32. 4171 | 1637787. 953 |
| M238T252   | 238. 018581  | 251. 555 | 1730354. 399 |
| M238T104   | 238. 0369703 | 104. 493 | 7224603. 998 |
| M238T427   | 238. 0543721 | 427. 362 | 10323251. 94 |
| M238T412   | 238. 0696713 | 411. 838 | 120636897. 3 |
| M238T395   | 238. 0704306 | 395. 264 | 26243341. 76 |
| M238T452   | 238. 0703466 | 451. 804 | 11198589. 27 |
| M238T169   | 238. 0702082 | 169. 221 | 331842425. 4 |
| M238T381_1 | 238. 0702339 | 380. 63  | 12070880. 51 |
| M238T468   | 238. 0703205 | 467. 706 | 12640306. 56 |
| M238T443   | 238. 0697429 | 443. 256 | 11718481. 48 |
| M238T261   | 238. 0695958 | 261. 177 | 8723506. 2   |
| M238T347   | 238. 070211  | 347. 175 | 6303280. 749 |
| M238T133   | 238. 0814762 | 133. 259 | 5197995. 703 |
| M238T240   | 238. 0896896 | 239. 913 | 2763958. 646 |
| M238T164   | 238. 0910206 | 163. 846 | 430423339. 3 |
| M238T101   | 238. 091024  | 101. 161 | 49097186. 96 |
| M238T88    | 238. 0910157 | 87. 6739 | 192176670. 1 |
| M238T777_2 | 238. 0990697 | 777. 245 | 10406769. 71 |
| M238T541   | 238. 1067246 | 541. 275 | 27570633. 15 |
| M238T566   | 238. 106762  | 565. 79  | 12518513. 64 |

|            |              |          |              |
|------------|--------------|----------|--------------|
| M238T500   | 238. 1071688 | 500. 045 | 23760373. 27 |
| M238T338   | 238. 1067343 | 337. 767 | 14099304. 1  |
| M238T601   | 238. 1067972 | 601. 04  | 5177356. 871 |
| M238T295   | 238. 1062491 | 295. 356 | 65100751. 74 |
| M238T278   | 238. 1068254 | 277. 699 | 15778101. 85 |
| M238T151   | 238. 1065594 | 151. 016 | 4635459. 879 |
| M238T358_1 | 238. 1067527 | 357. 958 | 13004969. 61 |
| M238T379   | 238. 1067859 | 379. 194 | 17338315. 37 |
| M238T301   | 238. 1176992 | 300. 782 | 14176687. 15 |
| M238T348   | 238. 1184812 | 348. 488 | 60821195. 69 |
| M238T399   | 238. 117611  | 399. 046 | 254678899. 5 |
| M238T420   | 238. 1166169 | 420. 274 | 7652289. 389 |
| M238T212   | 238. 1180199 | 212. 448 | 24801096. 62 |
| M238T324   | 238. 1176528 | 323. 984 | 59435425. 06 |
| M238T94    | 238. 1276092 | 93. 7378 | 6959086. 517 |
| M238T99    | 238. 1275447 | 98. 9918 | 17613375. 29 |
| M238T342   | 238. 1176398 | 341. 802 | 56960752. 48 |
| M238T87    | 238. 1275512 | 86. 6643 | 10171365. 79 |
| M238T381_2 | 238. 1177102 | 380. 63  | 31029704. 26 |
| M238T358_2 | 238. 1208222 | 357. 958 | 20695335. 41 |
| M238T290   | 238. 1285445 | 289. 912 | 11680148. 22 |
| M238T143   | 238. 1278741 | 142. 85  | 10572182. 31 |
| M238T121   | 238. 1277021 | 120. 525 | 19115658. 55 |
| M238T341   | 238. 1424024 | 340. 548 | 8649519. 48  |
| M238T375   | 238. 143365  | 375. 021 | 14181762. 62 |
| M238T471   | 238. 1432058 | 470. 602 | 1581481. 412 |
| M238T540_2 | 238. 1521753 | 539. 764 | 2211315. 21  |
| M238T524   | 238. 1796247 | 523. 735 | 394682. 5146 |
| M238T743   | 238. 1872997 | 742. 68  | 3233042. 644 |
| M238T692   | 238. 1873628 | 692. 461 | 2435335. 746 |
| M238T811   | 238. 1877107 | 811. 413 | 7074548. 72  |
| M239T302_1 | 238. 5349261 | 302. 191 | 2513649. 06  |
| M239T346   | 239. 0275443 | 345. 848 | 7140633. 186 |
| M239T461   | 239. 0538604 | 460. 537 | 3613338. 282 |
| M239T169   | 239. 0732145 | 169. 221 | 29950569. 94 |
| M239T477   | 239. 0906443 | 476. 554 | 3080444. 149 |
| M239T164   | 239. 0941618 | 163. 846 | 36680130. 84 |
| M239T497   | 239. 0897808 | 497. 214 | 10567783     |
| M239T563   | 239. 0880925 | 563. 297 | 27092070. 85 |
| M239T119   | 239. 101057  | 119. 433 | 14211958. 94 |
| M239T459   | 239. 1021197 | 458. 985 | 1870558. 375 |
| M239T310   | 239. 1019837 | 310. 075 | 13417344. 22 |
| M239T106_1 | 239. 1019878 | 105. 503 | 24002287. 96 |
| M239T302_2 | 239. 1016996 | 302. 191 | 18978514. 43 |
| M239T777   | 239. 0968788 | 777. 245 | 4263598. 219 |
| M239T449   | 239. 1020435 | 448. 978 | 3328440. 597 |
| M239T320   | 239. 1016971 | 319. 758 | 31253729. 62 |
| M239T151_1 | 239. 1022725 | 151. 016 | 16174381. 29 |
| M239T374   | 239. 10437   | 373. 532 | 20739282. 78 |
| M239T399_1 | 239. 1212742 | 399. 046 | 28035518. 98 |
| M239T524   | 239. 1272701 | 523. 735 | 1508097. 888 |
| M239T584   | 239. 1258066 | 584. 417 | 53827528. 92 |
| M239T481   | 239. 1371625 | 481. 042 | 31713804. 45 |
| M239T446   | 239. 1379927 | 445. 984 | 13589879. 28 |



|            |              |          |              |
|------------|--------------|----------|--------------|
| M239T458   | 239. 138845  | 457. 576 | 21913986. 79 |
| M239T471   | 239. 1388424 | 470. 602 | 15539872. 37 |
| M239T341   | 239. 1378832 | 340. 548 | 6087413. 092 |
| M239T304   | 239. 1382169 | 303. 513 | 12617368. 32 |
| M239T376   | 239. 1380885 | 376. 409 | 5619731. 702 |
| M239T104   | 239. 1379703 | 104. 493 | 25828590. 41 |
| M239T354   | 239. 1327484 | 353. 978 | 1519728. 767 |
| M239T187   | 239. 1494968 | 186. 709 | 14955884. 53 |
| M239T475   | 239. 1500768 | 475. 007 | 5878682. 453 |
| M239T399_2 | 239. 1498017 | 399. 046 | 147632573. 2 |
| M239T106_2 | 239. 1493278 | 105. 503 | 28293454. 02 |
| M239T334   | 239. 1494611 | 333. 715 | 20432922. 4  |
| M239T151_2 | 239. 1496273 | 151. 016 | 22992466. 55 |
| M239T558   | 239. 1633741 | 557. 967 | 2829778. 132 |
| M239T574   | 239. 1631512 | 574. 363 | 4665870. 495 |
| M239T631   | 239. 1630353 | 630. 507 | 12897930. 09 |
| M239T718   | 239. 1633898 | 717. 959 | 12967564. 49 |
| M239T772   | 239. 1633828 | 772. 206 | 10175110. 57 |
| M239T639   | 239. 1993352 | 639. 219 | 5384625. 731 |
| M240T358_1 | 239. 5596356 | 357. 958 | 2559311. 03  |
| M240T75    | 239. 9653022 | 74. 9588 | 192383729. 3 |
| M240T211   | 239. 997218  | 211. 288 | 8933660. 956 |
| M240T264   | 240. 0163926 | 264. 079 | 13409255. 15 |
| M240T345   | 240. 0492232 | 344. 555 | 10038462. 97 |
| M240T551   | 240. 0675283 | 550. 919 | 5975169. 33  |
| M240T412   | 240. 0758462 | 411. 838 | 667302. 5762 |
| M240T688   | 240. 0773487 | 687. 95  | 2995600. 041 |
| M240T432   | 240. 0850153 | 431. 64  | 14332897. 45 |
| M240T487   | 240. 0844579 | 486. 885 | 5237820. 704 |
| M240T480   | 240. 0850147 | 479. 527 | 5681668. 312 |
| M240T566   | 240. 0912036 | 565. 79  | 2054221. 23  |
| M240T106   | 240. 0858878 | 105. 503 | 18175810. 75 |
| M240T388   | 240. 0860316 | 387. 763 | 20642245. 02 |
| M240T143   | 240. 0859665 | 142. 85  | 9226191. 806 |
| M240T239   | 240. 0859821 | 238. 605 | 15798898. 58 |
| M240T362   | 240. 0860525 | 362. 146 | 22395701. 1  |
| M240T327   | 240. 0856394 | 326. 78  | 13852064. 8  |
| M240T164   | 240. 0968268 | 163. 846 | 11116402. 87 |
| M240T271   | 240. 096513  | 270. 983 | 9643118. 09  |
| M240T341   | 240. 0966136 | 340. 548 | 108052605. 8 |
| M240T155   | 240. 0967256 | 155. 197 | 7428778. 264 |
| M240T96    | 240. 1070572 | 95. 7572 | 7373339. 713 |
| M240T320   | 240. 1053357 | 319. 758 | 2747392. 705 |
| M240T674   | 240. 1036745 | 674. 402 | 3591640. 376 |
| M240T104   | 240. 0973829 | 104. 493 | 7693459. 699 |
| M240T325   | 240. 1221859 | 325. 35  | 93538652. 65 |
| M240T225   | 240. 1191443 | 224. 729 | 15920865. 73 |
| M240T626   | 240. 1221892 | 626. 042 | 7821846. 476 |
| M240T660   | 240. 1220982 | 660. 455 | 9354485. 817 |
| M240T199   | 240. 122095  | 199. 43  | 23212465. 47 |
| M240T167   | 240. 1222104 | 166. 613 | 410518048. 8 |
| M240T121   | 240. 1221492 | 120. 525 | 227240074. 2 |
| M240T214   | 240. 1221883 | 213. 872 | 30519651. 55 |
| M240T316   | 240. 1221956 | 315. 701 | 26383204. 54 |

|            |              |          |              |
|------------|--------------|----------|--------------|
| M240T176   | 240. 1222558 | 175. 952 | 514540243. 9 |
| M240T304   | 240. 1216058 | 303. 513 | 144323228. 9 |
| M240T148_1 | 240. 1221576 | 148. 117 | 122206083. 6 |
| M240T639   | 240. 1371487 | 639. 219 | 1726621. 085 |
| M240T310   | 240. 1331878 | 310. 075 | 12658859. 95 |
| M240T334   | 240. 1331538 | 333. 715 | 23657876. 84 |
| M240T374   | 240. 1331238 | 373. 532 | 18395494. 53 |
| M240T394   | 240. 1332401 | 393. 934 | 10454495. 58 |
| M240T324   | 240. 1331347 | 323. 984 | 19724532. 48 |
| M240T290   | 240. 1442719 | 289. 912 | 193061440. 3 |
| M240T190   | 240. 1433139 | 189. 571 | 23764139. 07 |
| M240T137   | 240. 1433536 | 137. 373 | 42210563. 26 |
| M240T118   | 240. 1432856 | 118. 116 | 45473710. 45 |
| M240T148_2 | 240. 1432332 | 148. 117 | 23881223. 12 |
| M240T399   | 240. 152081  | 399. 046 | 15998037. 5  |
| M240T423   | 240. 1695153 | 423. 199 | 501945. 993  |
| M240T358_2 | 240. 1810492 | 357. 958 | 8508026. 06  |
| M240T777   | 240. 1953953 | 777. 245 | 35979883. 38 |
| M241T75    | 240. 9517    | 74. 9588 | 9993855. 185 |
| M241T131   | 240. 9896764 | 130. 668 | 3494484. 479 |
| M241T712   | 241. 001509  | 711. 984 | 6899312. 096 |
| M241T35    | 241. 0006047 | 34. 5397 | 7018662. 041 |
| M241T211   | 241. 0174936 | 211. 288 | 3988085. 093 |
| M241T122   | 241. 0281072 | 122. 007 | 42757309. 98 |
| M241T111   | 241. 0280073 | 111. 382 | 9808776. 11  |
| M241T121   | 241. 0548159 | 120. 525 | 7203416. 321 |
| M241T411   | 241. 069782  | 410. 542 | 11301992. 59 |
| M241T293   | 241. 0699493 | 292. 623 | 46284200. 13 |
| M241T143   | 241. 0693856 | 142. 85  | 22883118. 36 |
| M241T651   | 241. 0698386 | 650. 898 | 13456378. 6  |
| M241T620   | 241. 0698454 | 620. 172 | 12089143. 53 |
| M241T545   | 241. 0692367 | 545. 203 | 20455716. 08 |
| M241T632   | 241. 0696914 | 631. 982 | 7466362. 2   |
| M241T104   | 241. 0693489 | 104. 493 | 122480771    |
| M241T325   | 241. 0812947 | 325. 35  | 2529732. 784 |
| M241T167_1 | 241. 0809695 | 166. 613 | 4729104. 255 |
| M241T89    | 241. 0813875 | 88. 6838 | 11717653. 6  |
| M241T680   | 241. 0965587 | 680. 402 | 1853446. 582 |
| M241T484   | 241. 0964299 | 483. 973 | 3479738. 035 |
| M241T412   | 241. 106289  | 411. 838 | 3317723. 792 |
| M241T426   | 241. 1061775 | 425. 909 | 5063413. 387 |
| M241T351   | 241. 1178022 | 351. 348 | 51691943. 68 |
| M241T106_1 | 241. 1177136 | 105. 503 | 26168408. 08 |
| M241T167_2 | 241. 1263444 | 166. 613 | 52719428. 98 |
| M241T176   | 241. 1254549 | 175. 952 | 60451348. 25 |
| M241T148   | 241. 1261907 | 148. 117 | 14025066. 49 |
| M241T308   | 241. 1283134 | 307. 735 | 69810074. 8  |
| M241T106_2 | 241. 1284029 | 105. 503 | 14149149. 49 |
| M241T295   | 241. 1283136 | 295. 356 | 16996628. 79 |
| M241T316   | 241. 1284737 | 315. 701 | 129953994. 1 |
| M241T209   | 241. 1288544 | 208. 905 | 92192392. 21 |
| M241T228   | 241. 1288586 | 227. 633 | 146537939    |
| M241T290   | 241. 1426771 | 289. 912 | 4367667. 566 |
| M241T477   | 241. 142616  | 476. 554 | 2659255. 483 |

|            |              |          |              |
|------------|--------------|----------|--------------|
| M241T567   | 241. 1409465 | 567. 1   | 3360427. 112 |
| M241T223   | 241. 1504572 | 223. 474 | 261851190. 9 |
| M241T286   | 241. 1542467 | 285. 9   | 40892851     |
| M241T452   | 241. 1541255 | 451. 804 | 39919424. 8  |
| M241T188   | 241. 1505149 | 188. 126 | 39714011. 11 |
| M241T175   | 241. 153331  | 174. 865 | 31673818. 18 |
| M241T272   | 241. 1761261 | 272. 304 | 3665078. 916 |
| M241T800   | 241. 1789623 | 800. 484 | 2620394. 441 |
| M242T122   | 241. 5296472 | 122. 007 | 6851508. 962 |
| M242T75_1  | 241. 9633997 | 74. 9588 | 29520576. 3  |
| M242T75_2  | 241. 9973075 | 74. 9588 | 2461547447   |
| M242T512   | 242. 0342943 | 511. 77  | 683565. 1274 |
| M242T341   | 242. 0329226 | 340. 548 | 12346228. 86 |
| M242T35    | 242. 0329424 | 34. 5397 | 10024010. 75 |
| M242T588   | 242. 0561785 | 587. 521 | 5671140. 25  |
| M242T164_1 | 242. 0650198 | 163. 846 | 5281439. 983 |
| M242T350   | 242. 0650944 | 349. 911 | 9393706. 867 |
| M242T106_1 | 242. 0730283 | 105. 503 | 7184154. 746 |
| M242T583   | 242. 0927079 | 583. 068 | 4041235. 758 |
| M242T206   | 242. 1005529 | 205. 903 | 29113523. 18 |
| M242T144   | 242. 1007441 | 143. 959 | 32373738. 26 |
| M242T106_2 | 242. 1007688 | 105. 503 | 87537828. 84 |
| M242T342   | 242. 1012067 | 341. 802 | 11819066. 38 |
| M242T361   | 242. 1008556 | 360. 794 | 14515898. 11 |
| M242T284   | 242. 1023401 | 284. 377 | 43215336. 61 |
| M242T261   | 242. 1010714 | 261. 177 | 25945692. 43 |
| M242T219   | 242. 100385  | 219. 233 | 46281211. 13 |
| M242T184   | 242. 112378  | 183. 886 | 90864339. 55 |
| M242T101   | 242. 1139079 | 101. 161 | 4732580. 648 |
| M242T163_1 | 242. 1123575 | 162. 728 | 37425444. 8  |
| M242T229   | 242. 1123613 | 229. 059 | 274692572. 3 |
| M242T295   | 242. 1119455 | 295. 356 | 142923485. 7 |
| M242T201   | 242. 1123554 | 200. 766 | 99523597. 82 |
| M242T211   | 242. 1123533 | 211. 288 | 43538510. 5  |
| M242T354   | 242. 1124214 | 353. 978 | 51998573. 25 |
| M242T164_2 | 242. 123827  | 163. 846 | 11413519. 79 |
| M242T308   | 242. 1356125 | 307. 735 | 5575825. 882 |
| M242T163_2 | 242. 1351828 | 162. 728 | 14782322. 9  |
| M242T207   | 242. 1334417 | 207. 393 | 12863909. 6  |
| M242T143   | 242. 1353096 | 142. 85  | 7799939. 273 |
| M242T316   | 242. 1355866 | 315. 701 | 8934453. 539 |
| M242T173   | 242. 1353186 | 173. 407 | 7106443. 395 |
| M242T228   | 242. 1345524 | 227. 633 | 14381673. 77 |
| M242T104   | 242. 1374096 | 104. 493 | 24358064. 79 |
| M242T531   | 242. 1530657 | 531. 127 | 4494744. 638 |
| M242T406_1 | 242. 1489753 | 406. 289 | 15344966. 3  |
| M242T579   | 242. 173875  | 578. 816 | 2802196. 271 |
| M242T398   | 242. 1730649 | 397. 878 | 10476481. 65 |
| M242T390   | 242. 1727997 | 390. 432 | 16758011. 06 |
| M242T406_2 | 242. 1748578 | 406. 289 | 4267624. 728 |
| M242T784   | 242. 2097868 | 783. 78  | 15063072. 34 |
| M242T824   | 242. 2830976 | 824. 311 | 11137627. 99 |
| M243T332   | 242. 6287184 | 332. 2   | 4877137. 438 |
| M243T670   | 242. 6321189 | 670. 166 | 3464216. 195 |

|            |              |          |              |
|------------|--------------|----------|--------------|
| M243T430   | 242. 6645327 | 430. 131 | 140007894. 3 |
| M243T37    | 242. 9542735 | 37. 1891 | 2489532. 561 |
| M243T168   | 242. 9812469 | 167. 804 | 13004262. 88 |
| M243T147   | 242. 996508  | 146. 742 | 25573795. 7  |
| M243T75    | 242. 9989706 | 74. 9588 | 657315131. 3 |
| M243T321   | 242. 9974026 | 321. 198 | 3308325. 972 |
| M243T92    | 243. 0252314 | 91. 7174 | 24747060. 52 |
| M243T143   | 243. 048623  | 142. 85  | 5852989. 782 |
| M243T295_1 | 243. 049258  | 295. 356 | 2605501. 233 |
| M243T104   | 243. 0489941 | 104. 493 | 4910781. 315 |
| M243T353   | 243. 0855526 | 352. 65  | 7973168. 961 |
| M243T144_1 | 243. 0853708 | 143. 959 | 8630043. 512 |
| M243T293   | 243. 08542   | 292. 623 | 8166925. 162 |
| M243T412   | 243. 0863659 | 411. 838 | 5182380. 839 |
| M243T106   | 243. 0854497 | 105. 503 | 15010288. 79 |
| M243T478   | 243. 0855497 | 477. 989 | 2103543. 378 |
| M243T331   | 243. 085464  | 330. 809 | 5896507. 201 |
| M243T371   | 243. 0854611 | 370. 777 | 4592790. 768 |
| M243T341_1 | 243. 0854603 | 340. 548 | 4679992. 585 |
| M243T595   | 243. 0853557 | 595. 066 | 13392061. 13 |
| M243T317   | 243. 085601  | 317. 199 | 5653643. 12  |
| M243T323   | 243. 097082  | 322. 536 | 7833040. 753 |
| M243T159   | 243. 0964906 | 159. 017 | 4056515. 935 |
| M243T342   | 243. 0962244 | 341. 802 | 27106960. 63 |
| M243T284   | 243. 1043689 | 284. 377 | 3606396. 173 |
| M243T219   | 243. 1042888 | 219. 233 | 4124015. 46  |
| M243T144_2 | 243. 108136  | 143. 959 | 5990393. 707 |
| M243T466   | 243. 1124643 | 466. 162 | 7074431. 453 |
| M243T184   | 243. 1159681 | 183. 886 | 8776121. 922 |
| M243T230   | 243. 1159056 | 230. 321 | 28369116. 84 |
| M243T504   | 243. 1222099 | 504. 466 | 6053136. 208 |
| M243T295_2 | 243. 1166106 | 295. 356 | 14759885. 86 |
| M243T201   | 243. 1158775 | 200. 766 | 8492105. 987 |
| M243T406   | 243. 1221887 | 406. 289 | 3072473. 897 |
| M243T290   | 243. 1331495 | 289. 912 | 6444040. 879 |
| M243T475   | 243. 1330456 | 475. 007 | 77164727. 38 |
| M243T398   | 243. 1330672 | 397. 878 | 8662818. 382 |
| M243T97    | 243. 1330476 | 96. 7698 | 150174015. 1 |
| M243T341_2 | 243. 133097  | 340. 548 | 30443551. 45 |
| M243T266   | 243. 1330788 | 265. 624 | 17586431. 64 |
| M243T297   | 243. 143883  | 296. 739 | 28416354. 05 |
| M243T110   | 243. 1447885 | 110. 047 | 14300141. 83 |
| M243T392   | 243. 1591654 | 391. 678 | 9371643. 984 |
| M243T429   | 243. 1665208 | 428. 735 | 30986674. 68 |
| M243T833   | 243. 1735602 | 833. 029 | 6015515. 926 |
| M243T88    | 243. 1817321 | 87. 6739 | 27659236. 74 |
| M243T381   | 243. 1806953 | 380. 63  | 72158551. 59 |
| M243T669   | 243. 2097413 | 668. 867 | 18431926. 82 |
| M243T649   | 243. 2096008 | 649. 338 | 8063238. 782 |
| M243T562   | 243. 2095293 | 561. 955 | 195946078. 2 |
| M243T545   | 243. 2095161 | 545. 203 | 100558929. 8 |
| M243T576   | 243. 2093704 | 575. 878 | 10068214. 2  |
| M244T628   | 243. 5923286 | 627. 58  | 7991745. 444 |
| M244T429   | 243. 6672963 | 428. 735 | 3753277. 197 |

|            |              |          |              |
|------------|--------------|----------|--------------|
| M244T216   | 243. 9893806 | 216. 359 | 11210053. 58 |
| M244T75    | 243. 9956498 | 74. 9588 | 696446364. 7 |
| M244T139   | 244. 0119143 | 138. 766 | 4841433. 46  |
| M244T111_1 | 244. 0334951 | 111. 382 | 3927332. 795 |
| M244T203   | 244. 0805698 | 203. 36  | 20233571. 76 |
| M244T177   | 244. 0806495 | 177. 295 | 28003053. 83 |
| M244T331   | 244. 0813753 | 330. 809 | 9255500. 778 |
| M244T318   | 244. 0805299 | 318. 497 | 5880097. 964 |
| M244T386   | 244. 0800616 | 386. 352 | 11914819. 82 |
| M244T456   | 244. 0958803 | 456. 126 | 33485513. 05 |
| M244T119   | 244. 0922962 | 119. 433 | 12174849. 73 |
| M244T106_1 | 244. 0922841 | 105. 503 | 371785902. 7 |
| M244T309   | 244. 1169906 | 308. 967 | 10523725. 99 |
| M244T190   | 244. 1167444 | 189. 571 | 11711064. 96 |
| M244T122   | 244. 1168283 | 122. 007 | 19772285. 73 |
| M244T106_2 | 244. 1144179 | 105. 503 | 40157124. 94 |
| M244T165   | 244. 1168526 | 165. 217 | 26765270. 59 |
| M244T143   | 244. 1176348 | 142. 85  | 28947123. 38 |
| M244T164   | 244. 1283464 | 163. 846 | 28658743. 78 |
| M244T111_2 | 244. 1283272 | 111. 382 | 29869772. 61 |
| M244T104   | 244. 1282988 | 104. 493 | 15323957. 98 |
| M244T148   | 244. 1284598 | 148. 117 | 45715798. 75 |
| M244T317   | 244. 1284742 | 317. 199 | 12590256. 1  |
| M244T347   | 244. 1281968 | 347. 175 | 73132253. 78 |
| M244T98    | 244. 1366325 | 97. 7824 | 5715147. 606 |
| M244T92    | 244. 1366157 | 91. 7174 | 4080921. 437 |
| M244T484   | 244. 1538509 | 483. 973 | 2846361. 864 |
| M244T413   | 244. 1894769 | 413. 295 | 12635435. 31 |
| M244T791   | 244. 1899671 | 790. 802 | 12585037. 98 |
| M244T605   | 244. 1899417 | 605. 264 | 3377404. 583 |
| M244T574   | 244. 1899024 | 574. 363 | 3337683. 425 |
| M244T403   | 244. 1899144 | 403. 447 | 5840491. 485 |
| M244T697   | 244. 1890753 | 696. 575 | 267123517. 3 |
| M244T562   | 244. 2134739 | 561. 955 | 39763125. 37 |
| M244T767   | 244. 2623838 | 766. 742 | 278155645    |
| M244T758   | 244. 2623702 | 758. 236 | 302146873. 4 |
| M244T751   | 244. 2623708 | 751. 333 | 104609324. 2 |
| M245T334   | 244. 6557078 | 333. 715 | 4508654. 045 |
| M245T131   | 244. 9608163 | 130. 668 | 5813404. 471 |
| M245T249   | 244. 9732261 | 248. 895 | 1273693. 793 |
| M245T75    | 244. 9975995 | 74. 9588 | 90777411. 67 |
| M245T331   | 245. 0053585 | 330. 809 | 3923763. 389 |
| M245T261   | 245. 0281147 | 261. 177 | 1741358. 205 |
| M245T206   | 245. 0763286 | 205. 903 | 525396245    |
| M245T263   | 245. 075839  | 262. 529 | 5328284. 192 |
| M245T99    | 245. 0763045 | 98. 9918 | 8399520. 28  |
| M245T143   | 245. 0753953 | 142. 85  | 33335153. 12 |
| M245T107   | 245. 0759353 | 106. 513 | 17823838. 35 |
| M245T533   | 245. 0929348 | 532. 526 | 1334647. 98  |
| M245T106   | 245. 0961662 | 105. 503 | 32459501. 16 |
| M245T164   | 245. 1127014 | 163. 846 | 89832292. 1  |
| M245T147   | 245. 1119709 | 146. 742 | 31642626. 99 |
| M245T393   | 245. 1149023 | 392. 715 | 15193302. 25 |
| M245T94    | 245. 11191   | 93. 7378 | 18124967. 61 |

|            |              |          |              |
|------------|--------------|----------|--------------|
| M245T188   | 245. 112797  | 188. 126 | 51509785. 01 |
| M245T318   | 245. 1127117 | 318. 497 | 2581793. 495 |
| M245T176   | 245. 1118604 | 175. 952 | 77518298. 51 |
| M245T104   | 245. 1126283 | 104. 493 | 59882776. 36 |
| M245T210   | 245. 1231524 | 210. 186 | 7971768. 597 |
| M245T712   | 245. 1179869 | 711. 984 | 6959124. 917 |
| M245T218   | 245. 1231869 | 217. 866 | 8787729. 756 |
| M245T239   | 245. 1231959 | 238. 605 | 6075052. 012 |
| M245T541   | 245. 1263751 | 541. 275 | 43547940. 7  |
| M245T347   | 245. 1308977 | 347. 175 | 6434655. 967 |
| M245T531   | 245. 1390158 | 531. 127 | 3724023. 04  |
| M245T583   | 245. 1372416 | 583. 068 | 26849984. 42 |
| M245T544   | 245. 1372484 | 544. 056 | 22588373. 23 |
| M245T372   | 245. 150656  | 372. 152 | 2329502. 634 |
| M245T329   | 245. 1494099 | 329. 481 | 4622950. 174 |
| M245T385   | 245. 1488211 | 385. 081 | 2817112. 258 |
| M245T325   | 245. 160057  | 325. 35  | 74363096. 52 |
| M245T98    | 245. 1599949 | 97. 7824 | 24853651. 88 |
| M245T563   | 245. 1892334 | 563. 297 | 13482369. 32 |
| M245T449   | 245. 1854964 | 448. 978 | 74085899. 2  |
| M245T233   | 245. 1964595 | 233. 081 | 5627161. 098 |
| M245T191   | 245. 1966117 | 190. 962 | 4655978. 778 |
| M245T697   | 245. 1953427 | 696. 575 | 29643547. 16 |
| M245T649   | 245. 2244404 | 649. 338 | 15588291. 48 |
| M245T562   | 245. 225609  | 561. 955 | 29257340. 93 |
| M245T703   | 245. 2255854 | 703. 35  | 16973100. 31 |
| M246T74    | 245. 9941321 | 73. 8324 | 44661899. 21 |
| M246T309   | 246. 0607297 | 308. 967 | 5391985. 61  |
| M246T142   | 246. 059926  | 141. 825 | 17286802. 07 |
| M246T203   | 246. 0619338 | 203. 36  | 4178025. 439 |
| M246T117   | 246. 0598562 | 116. 689 | 188143737. 5 |
| M246T100   | 246. 0598292 | 100. 146 | 1240119995   |
| M246T519   | 246. 074324  | 519. 257 | 1875738. 344 |
| M246T206   | 246. 079143  | 205. 903 | 49023270. 93 |
| M246T101   | 246. 0932162 | 101. 161 | 208341463. 3 |
| M246T163   | 246. 0965376 | 162. 728 | 21047498. 46 |
| M246T294   | 246. 0964598 | 293. 896 | 19176902. 68 |
| M246T126   | 246. 0964869 | 125. 598 | 26232186. 19 |
| M246T334   | 246. 0956149 | 333. 715 | 9024066. 756 |
| M246T389   | 246. 0964822 | 389. 035 | 2219426. 239 |
| M246T143   | 246. 0965326 | 142. 85  | 52703661. 52 |
| M246T405   | 246. 0964495 | 404. 872 | 6210607. 55  |
| M246T210_1 | 246. 0933349 | 210. 186 | 23009612. 95 |
| M246T685_1 | 246. 0965016 | 684. 985 | 5080893. 24  |
| M246T93    | 246. 0964925 | 92. 7272 | 436063581    |
| M246T316   | 246. 0964842 | 315. 701 | 27460267. 94 |
| M246T305   | 246. 09338   | 304. 777 | 20462278. 75 |
| M246T221   | 246. 1074161 | 220. 676 | 41503665. 22 |
| M246T393   | 246. 1111737 | 392. 715 | 3492190. 963 |
| M246T456   | 246. 1119161 | 456. 126 | 3379916. 764 |
| M246T386   | 246. 1120954 | 386. 352 | 4875397. 031 |
| M246T408   | 246. 1110611 | 407. 724 | 3126462. 462 |
| M246T503   | 246. 1112473 | 503. 046 | 3612128. 056 |
| M246T210_2 | 246. 1072344 | 210. 186 | 9064467. 907 |

|            |              |          |              |
|------------|--------------|----------|--------------|
| M246T374   | 246. 1111157 | 373. 532 | 2793192. 453 |
| M246T123   | 246. 1084873 | 123. 262 | 11856302. 93 |
| M246T573   | 246. 112122  | 573. 072 | 4604972. 124 |
| M246T597   | 246. 112985  | 596. 628 | 7505413. 427 |
| M246T324   | 246. 1100454 | 323. 984 | 1518775. 627 |
| M246T164_1 | 246. 1156897 | 163. 846 | 11726062. 3  |
| M246T104_1 | 246. 1153198 | 104. 493 | 3961081. 065 |
| M246T164_2 | 246. 1317704 | 163. 846 | 28593705. 5  |
| M246T541   | 246. 1307555 | 541. 275 | 12766110. 5  |
| M246T190   | 246. 1330551 | 189. 571 | 7839193. 938 |
| M246T111   | 246. 133381  | 111. 382 | 47887212. 05 |
| M246T104_2 | 246. 1333137 | 104. 493 | 44690292. 11 |
| M246T152   | 246. 1331278 | 152. 375 | 28382067. 32 |
| M246T341   | 246. 1332868 | 340. 548 | 7374135. 166 |
| M246T551   | 246. 1322145 | 550. 919 | 17429108. 35 |
| M246T318   | 246. 1331415 | 318. 497 | 11397509. 31 |
| M246T379   | 246. 1332065 | 379. 194 | 24606969. 17 |
| M246T169   | 246. 1439333 | 169. 221 | 21152106. 73 |
| M246T264   | 246. 1441546 | 264. 079 | 4610709. 2   |
| M246T362   | 246. 1441808 | 362. 146 | 22828450. 43 |
| M246T215   | 246. 1431768 | 215. 068 | 45812532. 57 |
| M246T278   | 246. 1440634 | 277. 699 | 3608929. 159 |
| M246T325   | 246. 1631722 | 325. 35  | 6131035. 662 |
| M246T446   | 246. 1696761 | 445. 984 | 7025146. 493 |
| M246T685_2 | 246. 16885   | 684. 985 | 4621869. 642 |
| M247T567   | 246. 5684371 | 567. 1   | 3477490. 472 |
| M247T432   | 246. 5805835 | 431. 64  | 2692353. 618 |
| M247T816   | 246. 6209238 | 815. 517 | 3927001. 768 |
| M247T60    | 247. 0116455 | 59. 9075 | 1873325. 633 |
| M247T266   | 247. 0117178 | 265. 624 | 5926986. 071 |
| M247T320   | 247. 0382677 | 319. 758 | 2216576. 691 |
| M247T117   | 247. 0640486 | 116. 689 | 13586942. 63 |
| M247T100   | 247. 0644616 | 100. 146 | 116348057. 8 |
| M247T119   | 247. 0807446 | 119. 433 | 38926964. 1  |
| M247T375   | 247. 0807041 | 375. 021 | 4272967. 719 |
| M247T158   | 247. 0807309 | 157. 773 | 46282508. 18 |
| M247T223   | 247. 0794176 | 223. 474 | 23480106. 69 |
| M247T190   | 247. 0806607 | 189. 571 | 45443769. 57 |
| M247T293   | 247. 0807392 | 292. 623 | 121767875. 3 |
| M247T180   | 247. 0806927 | 179. 75  | 40731649. 96 |
| M247T649_1 | 247. 0800376 | 649. 338 | 8819860. 216 |
| M247T106   | 247. 0806806 | 105. 503 | 244737627. 4 |
| M247T199   | 247. 0806835 | 199. 43  | 33137726. 65 |
| M247T143_1 | 247. 0807303 | 142. 85  | 55117476. 71 |
| M247T93_1  | 247. 0806869 | 92. 7272 | 62366341. 26 |
| M247T237   | 247. 0806082 | 237. 171 | 24033889. 8  |
| M247T209   | 247. 0806503 | 208. 905 | 37410604. 76 |
| M247T595   | 247. 080542  | 595. 066 | 3166613. 759 |
| M247T261   | 247. 0807104 | 261. 177 | 41715124. 88 |
| M247T386   | 247. 0805743 | 386. 352 | 5101990. 058 |
| M247T203   | 247. 0909887 | 203. 36  | 6165521. 38  |
| M247T221_1 | 247. 0917267 | 220. 676 | 3344428. 954 |
| M247T657   | 247. 095398  | 657. 451 | 3997217. 502 |
| M247T114   | 247. 1037187 | 114. 15  | 19842398. 16 |

|            |              |          |              |
|------------|--------------|----------|--------------|
| M247T93_2  | 247. 099515  | 92. 7272 | 40196067. 43 |
| M247T316   | 247. 1019285 | 315. 701 | 3188028. 184 |
| M247T104_1 | 247. 1011476 | 104. 493 | 39905650. 76 |
| M247T435   | 247. 1074219 | 434. 589 | 25818694. 78 |
| M247T221_2 | 247. 1111133 | 220. 676 | 3196765. 206 |
| M247T422   | 247. 1073524 | 421. 784 | 1651732. 093 |
| M247T161   | 247. 1276435 | 161. 494 | 69280328. 23 |
| M247T243   | 247. 1276511 | 242. 682 | 43559068. 22 |
| M247T104_2 | 247. 1276719 | 104. 493 | 14541275. 67 |
| M247T254   | 247. 1276388 | 254. 446 | 75408314. 9  |
| M247T219   | 247. 1276248 | 219. 233 | 48075003. 07 |
| M247T97    | 247. 1277012 | 96. 7698 | 10995194. 85 |
| M247T334   | 247. 1285832 | 333. 715 | 27178437. 1  |
| M247T374   | 247. 1286032 | 373. 532 | 16225066. 81 |
| M247T777   | 247. 1317965 | 777. 245 | 3022317. 179 |
| M247T382   | 247. 1285644 | 382. 125 | 15335144. 63 |
| M247T744   | 247. 1314114 | 744. 182 | 7945403. 761 |
| M247T148   | 247. 1277537 | 148. 117 | 36467315. 7  |
| M247T635   | 247. 1322475 | 635. 022 | 19466530. 81 |
| M247T143_2 | 247. 1387193 | 142. 85  | 16341982. 67 |
| M247T154   | 247. 1387472 | 153. 785 | 80104560. 89 |
| M247T91    | 247. 1387171 | 90. 7088 | 271760104. 5 |
| M247T430   | 247. 1424412 | 430. 131 | 9218053. 948 |
| M247T121   | 247. 1387882 | 120. 525 | 35666769. 42 |
| M247T577   | 247. 1420513 | 577. 366 | 15345028. 02 |
| M247T113   | 247. 1388507 | 112. 781 | 68895930. 28 |
| M247T215   | 247. 1469439 | 215. 068 | 4655554. 41  |
| M247T449   | 247. 1543026 | 448. 978 | 2254008. 015 |
| M247T415   | 247. 1644029 | 414. 82  | 3353281. 391 |
| M247T811   | 247. 1628801 | 811. 413 | 10010858. 23 |
| M247T328   | 247. 1654382 | 328. 106 | 7024373. 754 |
| M247T321   | 247. 1654677 | 321. 198 | 4080223. 922 |
| M247T770   | 247. 1684491 | 769. 702 | 10334941. 93 |
| M247T838   | 247. 1668785 | 837. 524 | 16295561. 79 |
| M247T339   | 247. 1652564 | 339. 085 | 3644111. 134 |
| M247T716   | 247. 1682221 | 716. 403 | 3656965. 236 |
| M247T351   | 247. 1801719 | 351. 348 | 4592198. 17  |
| M247T649_2 | 247. 2044958 | 649. 338 | 5548524. 597 |
| M247T562   | 247. 204661  | 561. 955 | 7337223. 706 |
| M247T39    | 247. 4669462 | 39. 4128 | 1153228. 209 |
| M248T418   | 247. 5810966 | 417. 676 | 3535194. 819 |
| M248T521   | 247. 5796274 | 520. 739 | 1251616. 348 |
| M248T816   | 247. 6190275 | 815. 517 | 1319971. 061 |
| M248T342   | 247. 6387382 | 341. 802 | 10034745. 94 |
| M248T274   | 247. 9606462 | 273. 531 | 2269658. 622 |
| M248T351   | 248. 0540571 | 351. 348 | 4233693. 044 |
| M248T203   | 248. 0755321 | 203. 36  | 3053912. 38  |
| M248T96    | 248. 0754416 | 95. 7572 | 33096255. 73 |
| M248T152   | 248. 0761838 | 152. 375 | 8525193. 159 |
| M248T256   | 248. 0754544 | 255. 723 | 14649547. 7  |
| M248T293_1 | 248. 0838391 | 292. 623 | 10469221. 69 |
| M248T477   | 248. 0910643 | 476. 554 | 3651265. 716 |
| M248T574   | 248. 0911985 | 574. 363 | 8945454. 085 |
| M248T673   | 248. 092265  | 672. 956 | 9202480. 178 |



|            |             |         |             |
|------------|-------------|---------|-------------|
| M248T613   | 248.0903112 | 612.699 | 15597366.36 |
| M248T184   | 248.1099914 | 183.886 | 51540880.68 |
| M248T513   | 248.104346  | 513.285 | 2351031.452 |
| M248T233   | 248.110181  | 233.081 | 131414668.7 |
| M248T121   | 248.110007  | 120.525 | 58200062.85 |
| M248T339   | 248.1092036 | 339.085 | 9019177.335 |
| M248T301   | 248.1100916 | 300.782 | 45450284.43 |
| M248T104_1 | 248.1101067 | 104.493 | 121214941.3 |
| M248T163   | 248.1116458 | 162.728 | 22422592.25 |
| M248T293_2 | 248.1111481 | 292.623 | 86949856.58 |
| M248T207   | 248.1116319 | 207.393 | 14566437.72 |
| M248T252   | 248.1115561 | 251.555 | 42880763.1  |
| M248T264   | 248.1115954 | 264.079 | 36928236.15 |
| M248T145   | 248.1111469 | 145.382 | 40939276.56 |
| M248T172   | 248.1117048 | 171.935 | 37763723.02 |
| M248T94    | 248.1110462 | 93.7378 | 607314970.3 |
| M248T318   | 248.1117307 | 318.497 | 14033727.03 |
| M248T493   | 248.1233829 | 492.895 | 786025.9165 |
| M248T218   | 248.123636  | 217.866 | 17399644.82 |
| M248T161   | 248.1313163 | 161.494 | 4022860.198 |
| M248T399   | 248.1273044 | 399.046 | 11275291.97 |
| M248T243   | 248.1315346 | 242.682 | 3047057.84  |
| M248T254   | 248.1307678 | 254.446 | 5253840.153 |
| M248T317   | 248.1317379 | 317.199 | 1218423.242 |
| M248T411   | 248.1385323 | 410.542 | 8082713.059 |
| M248T378   | 248.1385331 | 377.704 | 7256147.018 |
| M248T635   | 248.1357    | 635.022 | 1950970.553 |
| M248T445   | 248.1468636 | 444.725 | 32142373.74 |
| M248T91    | 248.1422254 | 90.7088 | 22074100.23 |
| M248T364   | 248.1448944 | 363.58  | 3613915.762 |
| M248T167   | 248.1486875 | 166.613 | 7667125.768 |
| M248T291   | 248.1486081 | 291.307 | 10015615.05 |
| M248T123   | 248.1485686 | 123.262 | 9362101.722 |
| M248T131   | 248.1486514 | 130.668 | 13858852.95 |
| M248T239   | 248.1483375 | 238.605 | 8365998.811 |
| M248T150   | 248.1486189 | 149.65  | 16180484.68 |
| M248T471   | 248.1494914 | 470.602 | 31988827.61 |
| M248T104_2 | 248.1486435 | 104.493 | 15952748.64 |
| M249T272   | 248.9681261 | 272.304 | 644917.0269 |
| M249T219   | 248.9680948 | 219.233 | 1945461.316 |
| M249T358   | 249.0229831 | 357.958 | 2359071.618 |
| M249T119   | 249.0435331 | 119.433 | 77957349.92 |
| M249T183   | 249.0594016 | 182.574 | 28562973.37 |
| M249T574   | 249.059422  | 574.363 | 7266438.499 |
| M249T626   | 249.0593978 | 626.042 | 9733304.564 |
| M249T652   | 249.0602702 | 651.956 | 110313041.7 |
| M249T659   | 249.0602976 | 658.953 | 175235076   |
| M249T297   | 249.0595254 | 296.739 | 2387594.224 |
| M249T706_1 | 249.0593975 | 706.229 | 32869752.13 |
| M249T642   | 249.0593928 | 642.211 | 15644535.6  |
| M249T201   | 249.0593829 | 200.766 | 157529283.3 |
| M249T586   | 249.0591148 | 585.968 | 5060721.841 |
| M249T216   | 249.0594208 | 216.359 | 173904032.9 |
| M249T715   | 249.059402  | 715.011 | 19541038.71 |

|            |             |         |             |
|------------|-------------|---------|-------------|
| M249T677   | 249.0568112 | 677.376 | 26306243.9  |
| M249T118   | 249.0705413 | 118.116 | 12951912.16 |
| M249T104   | 249.0708954 | 104.493 | 13276458.85 |
| M249T295   | 249.0858897 | 295.356 | 2688050.637 |
| M249T613   | 249.0943287 | 612.699 | 1580052.348 |
| M249T584   | 249.1111903 | 584.417 | 2073054.653 |
| M249T482   | 249.111601  | 482.436 | 31917384    |
| M249T293   | 249.1152497 | 292.623 | 6142229.705 |
| M249T106   | 249.1152448 | 105.503 | 9587627.955 |
| M249T343   | 249.1222212 | 343.226 | 13165137.64 |
| M249T233   | 249.1153314 | 233.081 | 12391731.14 |
| M249T94    | 249.1152418 | 93.7378 | 60951466.9  |
| M249T316   | 249.1219004 | 315.701 | 13264087.59 |
| M249T355   | 249.1236663 | 355.41  | 9309413.091 |
| M249T402   | 249.12283   | 401.963 | 5399525.552 |
| M249T438   | 249.1228401 | 437.571 | 6446682.201 |
| M249T147   | 249.1441078 | 146.742 | 9813215.465 |
| M249T185   | 249.1442664 | 185.398 | 11384266.05 |
| M249T168   | 249.1441164 | 167.804 | 10838482.01 |
| M249T336   | 249.1394982 | 336.344 | 10445417.33 |
| M249T791   | 249.1484213 | 790.802 | 54074413.27 |
| M249T680   | 249.1483915 | 680.402 | 11150596.35 |
| M249T706_2 | 249.1470573 | 706.229 | 8897934.71  |
| M249T657   | 249.1472577 | 657.451 | 5601108.293 |
| M249T757   | 249.1468004 | 757.001 | 6882497.168 |
| M249T780   | 249.148423  | 780.043 | 10928255.89 |
| M249T694   | 249.1487093 | 693.81  | 42912524.27 |
| M249T803   | 249.1484342 | 802.88  | 59766103.35 |
| M249T823   | 249.1469989 | 822.881 | 3513988.279 |
| M249T722   | 249.1484919 | 722.193 | 10397984.03 |
| M249T496   | 249.1591638 | 495.779 | 11581848.3  |
| M249T465   | 249.1592018 | 464.668 | 3164343.873 |
| M249T563   | 249.1839479 | 563.297 | 9879316.132 |
| M249T669   | 249.1842487 | 668.867 | 6238686.691 |
| M250T119   | 249.545616  | 119.433 | 12588489.65 |
| M250T144_1 | 250.0548035 | 143.959 | 9489038.479 |
| M250T156   | 250.0549064 | 156.393 | 9378979.718 |
| M250T201   | 250.0623842 | 200.766 | 15063314.97 |
| M250T216   | 250.0624828 | 216.359 | 14788096.09 |
| M250T659   | 250.0631633 | 658.953 | 19230275.71 |
| M250T453   | 250.0699951 | 453.317 | 2292170.018 |
| M250T463   | 250.0699061 | 463.271 | 5312760.675 |
| M250T89    | 250.0895987 | 88.6838 | 351838987.2 |
| M250T101   | 250.0905965 | 101.161 | 88371703.64 |
| M250T107   | 250.0906742 | 106.513 | 17050567.65 |
| M250T142   | 250.0906965 | 141.825 | 16094661.06 |
| M250T128   | 250.090512  | 127.944 | 22240927.54 |
| M250T321   | 250.0925535 | 321.198 | 4152988.602 |
| M250T219   | 250.0914758 | 219.233 | 11193182.73 |
| M250T309   | 250.1032723 | 308.967 | 4822162.585 |
| M250T355   | 250.1064521 | 355.41  | 13350566.72 |
| M250T343   | 250.1065267 | 343.226 | 51674551.61 |
| M250T604   | 250.1063918 | 603.95  | 8928455.994 |
| M250T455   | 250.1066559 | 454.739 | 5094328     |

|            |              |          |              |
|------------|--------------|----------|--------------|
| M250T394   | 250. 1065043 | 393. 934 | 6317539. 774 |
| M250T371   | 250. 1063992 | 370. 777 | 6520248. 67  |
| M250T384   | 250. 1064946 | 383. 536 | 3850925. 68  |
| M250T459   | 250. 1176855 | 458. 985 | 29447362. 67 |
| M250T433   | 250. 1177238 | 433. 111 | 8000985. 568 |
| M250T820   | 250. 1177434 | 819. 78  | 1289688383   |
| M250T803   | 250. 1177473 | 802. 88  | 2761896. 321 |
| M250T98    | 250. 1270541 | 97. 7824 | 87086188. 22 |
| M250T163   | 250. 1271083 | 162. 728 | 46870365. 57 |
| M250T144_2 | 250. 127125  | 143. 959 | 34524435. 93 |
| M250T104   | 250. 127108  | 104. 493 | 112501349. 8 |
| M250T91    | 250. 1271916 | 90. 7088 | 47058606. 68 |
| M250T348   | 250. 1281725 | 348. 488 | 9227878. 636 |
| M250T310   | 250. 1342192 | 310. 075 | 3024424. 788 |
| M250T320   | 250. 1341654 | 319. 758 | 1287527. 204 |
| M250T408   | 250. 1430019 | 407. 724 | 3476509. 554 |
| M250T361   | 250. 1430935 | 360. 794 | 3968541. 982 |
| M250T334   | 250. 1632322 | 333. 715 | 72201617. 33 |
| M250T777   | 250. 1767724 | 777. 245 | 13211377. 74 |
| M250T751   | 250. 1768493 | 751. 333 | 304015560. 5 |
| M250T32    | 250. 1769471 | 32. 4171 | 502397. 5816 |
| M251T84    | 251. 0281146 | 83. 5661 | 514480849. 3 |
| M251T100   | 251. 075237  | 100. 146 | 27022829     |
| M251T309   | 251. 1012572 | 308. 967 | 13988835. 98 |
| M251T328   | 251. 1016548 | 328. 106 | 12044579. 13 |
| M251T355   | 251. 1016756 | 355. 41  | 11582938. 04 |
| M251T537   | 251. 1021357 | 536. 761 | 2648459. 034 |
| M251T408   | 251. 1016376 | 407. 724 | 9740975. 063 |
| M251T210   | 251. 1016781 | 210. 186 | 11350941. 73 |
| M251T320   | 251. 101593  | 319. 758 | 13349456. 13 |
| M251T342   | 251. 1017435 | 341. 802 | 19305931. 17 |
| M251T365   | 251. 1012195 | 365. 061 | 13445779. 78 |
| M251T462   | 251. 1029638 | 461. 845 | 54105988. 45 |
| M251T459   | 251. 1212459 | 458. 985 | 3013416. 431 |
| M251T685   | 251. 1241426 | 684. 985 | 17931104. 56 |
| M251T820   | 251. 1213788 | 819. 78  | 166871050. 4 |
| M251T484   | 251. 1230435 | 483. 973 | 2316870. 796 |
| M251T625   | 251. 1263078 | 624. 608 | 4408478. 683 |
| M251T104   | 251. 1308994 | 104. 493 | 11702301. 59 |
| M251T253   | 251. 1382409 | 253. 024 | 3076192. 059 |
| M251T346   | 251. 1354525 | 345. 848 | 10588542. 05 |
| M251T458   | 251. 1384336 | 457. 576 | 1894720. 476 |
| M251T325   | 251. 148402  | 325. 35  | 26980212. 42 |
| M251T358   | 251. 1490411 | 357. 958 | 6016954. 861 |
| M251T672   | 251. 1624901 | 671. 649 | 13612723. 8  |
| M251T75    | 251. 1584236 | 74. 9588 | 79817816. 12 |
| M251T652   | 251. 1625435 | 651. 956 | 10800135. 31 |
| M251T794   | 251. 1628721 | 793. 649 | 8522633. 905 |
| M251T751   | 251. 1808173 | 751. 333 | 39060699. 28 |
| M251T545   | 251. 1845447 | 545. 203 | 18319052. 19 |
| M252T628   | 251. 578995  | 627. 58  | 1221201. 881 |
| M252T452   | 251. 7808775 | 451. 804 | 2605364. 562 |
| M252T43    | 251. 9281757 | 43. 0471 | 13406794. 71 |
| M252T62    | 251. 9282287 | 62. 1777 | 12990704. 65 |

|            |              |          |              |
|------------|--------------|----------|--------------|
| M252T37    | 251. 9490582 | 37. 1891 | 3699415. 836 |
| M252T84    | 252. 0338318 | 83. 5661 | 32513902. 26 |
| M252T133   | 252. 0528166 | 133. 259 | 4316488. 243 |
| M252T68    | 252. 0695905 | 68. 0903 | 4785982. 769 |
| M252T272   | 252. 0706896 | 272. 304 | 12963764. 1  |
| M252T161   | 252. 0858158 | 161. 494 | 8134590. 474 |
| M252T439   | 252. 0852042 | 439. 021 | 14321894. 97 |
| M252T462_1 | 252. 0856449 | 461. 845 | 23160197. 93 |
| M252T513   | 252. 0866213 | 513. 285 | 23062783. 72 |
| M252T419   | 252. 0856125 | 418. 97  | 19537357. 49 |
| M252T389_1 | 252. 0856299 | 389. 035 | 32192374. 32 |
| M252T613   | 252. 0856315 | 612. 699 | 7586178. 543 |
| M252T533   | 252. 0866051 | 532. 526 | 8696995. 33  |
| M252T487   | 252. 0906752 | 486. 885 | 8202037. 855 |
| M252T361   | 252. 0854718 | 360. 794 | 16703471. 19 |
| M252T347_1 | 252. 0856338 | 347. 175 | 10523045. 69 |
| M252T190   | 252. 0970305 | 189. 571 | 14166381. 79 |
| M252T180   | 252. 0970059 | 179. 75  | 14015188. 12 |
| M252T462_2 | 252. 0995834 | 461. 845 | 1683620. 557 |
| M252T139   | 252. 1066079 | 138. 766 | 8166204. 406 |
| M252T91    | 252. 1060668 | 90. 7088 | 3772266882   |
| M252T299   | 252. 1075198 | 299. 493 | 207094056. 5 |
| M252T158   | 252. 1065404 | 157. 773 | 14601279. 65 |
| M252T409   | 252. 1226269 | 409. 271 | 6962261. 039 |
| M252T282   | 252. 1218952 | 281. 666 | 6133550. 999 |
| M252T210   | 252. 1217124 | 210. 186 | 25843748. 01 |
| M252T509   | 252. 122637  | 508. 883 | 7161734. 275 |
| M252T295   | 252. 1218954 | 295. 356 | 17636525. 61 |
| M252T586   | 252. 1217599 | 585. 968 | 3278889. 005 |
| M252T490   | 252. 1226451 | 489. 826 | 11881219. 96 |
| M252T448   | 252. 11937   | 447. 531 | 7590707. 566 |
| M252T347_2 | 252. 121238  | 347. 175 | 41900920. 95 |
| M252T386   | 252. 1218427 | 386. 352 | 8049899. 345 |
| M252T572   | 252. 1226932 | 571. 523 | 6665497. 432 |
| M252T471   | 252. 1228954 | 470. 602 | 4890156. 399 |
| M252T317   | 252. 1227257 | 317. 199 | 14392045. 51 |
| M252T389_2 | 252. 1331391 | 389. 035 | 11659189. 69 |
| M252T203   | 252. 143478  | 203. 36  | 3327033. 544 |
| M252T375   | 252. 1587714 | 375. 021 | 17186037. 85 |
| M252T446   | 252. 1587282 | 445. 984 | 4445106. 743 |
| M252T521   | 252. 1697058 | 520. 739 | 4441327. 06  |
| M253T833   | 252. 6106337 | 833. 029 | 2638752. 146 |
| M253T81    | 252. 8802588 | 80. 824  | 6649479. 944 |
| M253T320   | 252. 9812971 | 319. 758 | 2319520. 27  |
| M253T84    | 253. 0259833 | 83. 5661 | 72927889. 67 |
| M253T158   | 253. 0675861 | 157. 773 | 58623610. 34 |
| M253T557   | 253. 0697016 | 556. 816 | 8654053. 988 |
| M253T353   | 253. 0698305 | 352. 65  | 17091042. 32 |
| M253T416_1 | 253. 069771  | 416. 239 | 17690217. 85 |
| M253T293   | 253. 0698282 | 292. 623 | 110486002. 1 |
| M253T472   | 253. 0689293 | 472. 132 | 12318891. 95 |
| M253T652   | 253. 0697332 | 651. 956 | 14014175. 2  |
| M253T659   | 253. 0697363 | 658. 953 | 13641095. 93 |
| M253T181   | 253. 0698567 | 181. 154 | 102145131. 4 |

|            |              |          |              |
|------------|--------------|----------|--------------|
| M253T389   | 253. 0698709 | 389. 035 | 8073808. 663 |
| M253T143   | 253. 0697429 | 142. 85  | 52572540. 73 |
| M253T455   | 253. 0697415 | 454. 739 | 93433758. 02 |
| M253T378   | 253. 0697644 | 377. 704 | 15604407. 05 |
| M253T209   | 253. 0698134 | 208. 905 | 52131660. 79 |
| M253T104_1 | 253. 0697226 | 104. 493 | 300802347. 9 |
| M253T462   | 253. 0893738 | 461. 845 | 2422487. 348 |
| M253T91    | 253. 1097968 | 90. 7088 | 372398619. 1 |
| M253T206   | 253. 1166151 | 205. 903 | 23926236     |
| M253T416_2 | 253. 1172825 | 416. 239 | 8410922. 255 |
| M253T325   | 253. 1175877 | 325. 35  | 37942214. 1  |
| M253T390   | 253. 1175593 | 390. 432 | 17827884. 14 |
| M253T260   | 253. 1175187 | 259. 74  | 54704029. 95 |
| M253T287   | 253. 1175976 | 287. 148 | 28302499. 18 |
| M253T299   | 253. 1135134 | 299. 493 | 37958116. 87 |
| M253T104_2 | 253. 1128225 | 104. 493 | 21709486. 88 |
| M253T305   | 253. 1271783 | 304. 777 | 12706003. 79 |
| M253T161   | 253. 1212834 | 161. 494 | 20943523. 83 |
| M253T173   | 253. 1206518 | 173. 407 | 7977639. 924 |
| M253T369   | 253. 1290089 | 369. 321 | 299204997. 5 |
| M253T103   | 253. 12848   | 103. 423 | 3140525. 059 |
| M253T297   | 253. 1290595 | 296. 739 | 7571219. 25  |
| M253T649   | 253. 1424497 | 649. 338 | 9340877. 332 |
| M253T703   | 253. 1423861 | 703. 35  | 5065333. 145 |
| M253T558   | 253. 1442891 | 557. 967 | 23851352. 36 |
| M253T223   | 253. 1537635 | 223. 474 | 7213035. 7   |
| M253T336   | 253. 1515187 | 336. 344 | 5185214. 474 |
| M253T490   | 253. 1540109 | 489. 826 | 3089532. 256 |
| M253T211   | 253. 1537281 | 211. 288 | 3168182. 556 |
| M253T375   | 253. 1604941 | 375. 021 | 2146342. 355 |
| M253T807   | 253. 1786022 | 807. 232 | 13127955. 21 |
| M253T770   | 253. 1784359 | 769. 702 | 10648288. 62 |
| M253T728   | 253. 1786301 | 728. 25  | 11089745. 78 |
| M253T672   | 253. 178484  | 671. 649 | 10932238. 37 |
| M253T832   | 253. 1786913 | 831. 709 | 9093458. 092 |
| M253T821   | 253. 1785996 | 821. 334 | 9476967. 221 |
| M253T691   | 253. 1786119 | 691. 022 | 15024592. 17 |
| M253T783   | 253. 2153602 | 782. 558 | 1469698. 41  |
| M254T503   | 253. 5984822 | 503. 046 | 46500623. 12 |
| M254T393   | 253. 6063367 | 392. 715 | 33640098. 85 |
| M254T252   | 253. 9962869 | 251. 555 | 22367892. 54 |
| M254T308_1 | 254. 0544041 | 307. 735 | 12609609. 02 |
| M254T396   | 254. 0644373 | 396. 415 | 6784501. 664 |
| M254T317_1 | 254. 0651762 | 317. 199 | 2952717. 072 |
| M254T455   | 254. 0720935 | 454. 739 | 10144765. 98 |
| M254T413   | 254. 0793478 | 413. 295 | 1349147. 557 |
| M254T190_1 | 254. 0738046 | 189. 571 | 7271941. 991 |
| M254T293   | 254. 073142  | 292. 623 | 11114872. 93 |
| M254T106_1 | 254. 0730381 | 105. 503 | 23369500. 4  |
| M254T172   | 254. 0760632 | 171. 935 | 60950929. 15 |
| M254T198   | 254. 0730461 | 198. 072 | 2972562. 422 |
| M254T318   | 254. 076919  | 318. 497 | 3312255. 13  |
| M254T218   | 254. 0874173 | 217. 866 | 3866590. 952 |
| M254T456   | 254. 1007274 | 456. 126 | 85302904. 57 |

|            |              |          |              |
|------------|--------------|----------|--------------|
| M254T477   | 254. 100742  | 476. 554 | 98466430. 37 |
| M254T432   | 254. 1010252 | 431. 64  | 22866764. 7  |
| M254T325   | 254. 1019391 | 325. 35  | 50906690. 55 |
| M254T367   | 254. 0997283 | 366. 514 | 29050064. 28 |
| M254T106_2 | 254. 0986067 | 105. 503 | 28064715. 08 |
| M254T419   | 254. 1009216 | 418. 97  | 17850498. 88 |
| M254T465   | 254. 1005538 | 464. 668 | 27468319. 23 |
| M254T304_1 | 254. 0986538 | 303. 513 | 18751141. 09 |
| M254T502   | 254. 1007492 | 501. 549 | 18416605. 21 |
| M254T284   | 254. 1009275 | 284. 377 | 13393684. 69 |
| M254T386   | 254. 1028205 | 386. 352 | 15818187. 75 |
| M254T206   | 254. 1125428 | 205. 903 | 8651260. 489 |
| M254T353_1 | 254. 1114542 | 352. 65  | 7185210. 84  |
| M254T190_2 | 254. 1123571 | 189. 571 | 15802212. 29 |
| M254T310   | 254. 112397  | 310. 075 | 46298022. 75 |
| M254T165_1 | 254. 1124851 | 165. 217 | 25905270. 11 |
| M254T91_1  | 254. 1111498 | 90. 7088 | 52385671. 16 |
| M254T425_1 | 254. 1119459 | 424. 572 | 8582982. 956 |
| M254T321_1 | 254. 1124319 | 321. 198 | 15917089. 46 |
| M254T148_1 | 254. 1125062 | 148. 117 | 19704866. 21 |
| M254T135   | 254. 122816  | 134. 574 | 8156026. 226 |
| M254T260   | 254. 1206581 | 259. 74  | 5956785. 749 |
| M254T150   | 254. 123089  | 149. 65  | 22039793. 61 |
| M254T91_2  | 254. 1221034 | 90. 7088 | 10963116. 85 |
| M254T369   | 254. 1338    | 369. 321 | 37708006. 22 |
| M254T308_2 | 254. 1372845 | 307. 735 | 8255191. 345 |
| M254T165_2 | 254. 1373072 | 165. 217 | 16409836. 89 |
| M254T267   | 254. 1365619 | 267. 171 | 19741802. 08 |
| M254T297   | 254. 1374093 | 296. 739 | 7308166. 987 |
| M254T507   | 254. 1375262 | 507. 343 | 6986558. 514 |
| M254T359   | 254. 1374737 | 359. 32  | 632540460. 3 |
| M254T148_2 | 254. 1373751 | 148. 117 | 24054814. 32 |
| M254T317_2 | 254. 1374434 | 317. 199 | 6583230. 823 |
| M254T558   | 254. 1486553 | 557. 967 | 2336901. 415 |
| M254T201   | 254. 1585404 | 200. 766 | 8386706. 67  |
| M254T321_2 | 254. 1595524 | 321. 198 | 915011232. 3 |
| M254T425_2 | 254. 173903  | 424. 572 | 7230004. 677 |
| M254T353_2 | 254. 1849166 | 352. 65  | 655768. 8495 |
| M254T304_2 | 254. 185175  | 303. 513 | 1961741. 281 |
| M255T777   | 254. 609443  | 777. 245 | 5463417. 152 |
| M255T252   | 254. 96063   | 251. 555 | 5505023. 3   |
| M255T210   | 254. 9820034 | 210. 186 | 976799. 1301 |
| M255T211   | 255. 0050809 | 211. 288 | 12085549. 88 |
| M255T116   | 255. 0276016 | 115. 522 | 6610206. 715 |
| M255T123   | 255. 0277223 | 123. 262 | 5390549. 841 |
| M255T427   | 255. 0280624 | 427. 362 | 1154526. 386 |
| M255T177   | 255. 0279132 | 177. 295 | 17221890. 83 |
| M255T127   | 255. 0432396 | 126. 785 | 5078597. 527 |
| M255T158   | 255. 049079  | 157. 773 | 2432090. 639 |
| M255T101   | 255. 0600801 | 101. 161 | 7850839. 637 |
| M255T147   | 255. 0601967 | 146. 742 | 3190181. 524 |
| M255T452   | 255. 0840005 | 451. 804 | 19114187. 02 |
| M255T172   | 255. 0790853 | 171. 935 | 6402451. 008 |
| M255T502   | 255. 084357  | 501. 549 | 5047102. 341 |

|            |              |          |              |
|------------|--------------|----------|--------------|
| M255T367   | 255. 085474  | 366. 514 | 5174929. 828 |
| M255T516   | 255. 0851905 | 516. 214 | 5046043. 993 |
| M255T334   | 255. 0853309 | 333. 715 | 9054506. 276 |
| M255T533   | 255. 0853    | 532. 526 | 8682168. 653 |
| M255T406   | 255. 0853914 | 406. 289 | 5971848. 216 |
| M255T429   | 255. 0853031 | 428. 735 | 20782421. 65 |
| M255T100   | 255. 0968655 | 100. 146 | 82886996. 33 |
| M255T106   | 255. 0969816 | 105. 503 | 34236170. 43 |
| M255T342_1 | 255. 0964353 | 341. 802 | 4465568. 168 |
| M255T234   | 255. 0968764 | 234. 447 | 10411497. 29 |
| M255T456   | 255. 1055657 | 456. 126 | 10028093. 92 |
| M255T477   | 255. 1055697 | 476. 554 | 12447144. 05 |
| M255T325   | 255. 1048443 | 325. 35  | 5935498. 76  |
| M255T310   | 255. 1157825 | 310. 075 | 4487588. 704 |
| M255T375   | 255. 1327141 | 375. 021 | 46271275. 19 |
| M255T419   | 255. 1335505 | 418. 97  | 10443300. 02 |
| M255T388   | 255. 1327301 | 387. 763 | 11233040. 75 |
| M255T323   | 255. 1327565 | 322. 536 | 12191490. 62 |
| M255T299   | 255. 1326914 | 299. 493 | 12594796. 62 |
| M255T104   | 255. 1327521 | 104. 493 | 21291244. 53 |
| M255T109   | 255. 1443442 | 108. 698 | 12666673. 21 |
| M255T342_2 | 255. 144254  | 341. 802 | 158287034. 1 |
| M255T359   | 255. 1422231 | 359. 32  | 90350748. 8  |
| M255T261   | 255. 1443271 | 261. 177 | 13970933. 33 |
| M255T558   | 255. 1578258 | 557. 967 | 5297553. 782 |
| M255T771   | 255. 1585517 | 771. 042 | 5097191. 043 |
| M255T449   | 255. 1581712 | 448. 978 | 4119152. 239 |
| M255T321   | 255. 1653479 | 321. 198 | 102624280. 4 |
| M255T278   | 255. 1702344 | 277. 699 | 6217896. 416 |
| M255T562   | 255. 2100389 | 561. 955 | 19697794. 92 |
| M256T493   | 255. 5844366 | 492. 895 | 4099736. 355 |
| M256T811_1 | 255. 6444282 | 811. 413 | 8523926. 754 |
| M256T353_1 | 255. 6539607 | 352. 65  | 2704635. 957 |
| M256T76    | 255. 9371345 | 76. 0874 | 56117576. 13 |
| M256T266   | 255. 988955  | 265. 624 | 3578056. 082 |
| M256T348   | 256. 0121814 | 348. 488 | 2178978. 451 |
| M256T253   | 256. 0292472 | 253. 024 | 2642116      |
| M256T164   | 256. 0419018 | 163. 846 | 1598118. 78  |
| M256T321   | 256. 0379388 | 321. 198 | 6391356. 656 |
| M256T276   | 256. 0507493 | 276. 414 | 812614. 122  |
| M256T353_2 | 256. 0627659 | 352. 65  | 5962934. 163 |
| M256T311   | 256. 0798493 | 311. 445 | 22617211. 17 |
| M256T142   | 256. 0803052 | 141. 825 | 52656093. 29 |
| M256T294   | 256. 0817309 | 293. 896 | 19437495. 91 |
| M256T335   | 256. 0802262 | 334. 966 | 15033368. 11 |
| M256T169_1 | 256. 0797827 | 169. 221 | 426997488. 2 |
| M256T116   | 256. 0797575 | 115. 522 | 52902930. 12 |
| M256T346   | 256. 0803051 | 345. 848 | 24749256. 24 |
| M256T371   | 256. 0802786 | 370. 777 | 36674345. 25 |
| M256T104   | 256. 0797307 | 104. 493 | 159382826. 5 |
| M256T354   | 256. 0798039 | 353. 978 | 28308633. 3  |
| M256T261   | 256. 0798664 | 261. 177 | 32266952. 08 |
| M256T611   | 256. 0890968 | 611. 145 | 14458762. 32 |
| M256T429   | 256. 0877911 | 428. 735 | 1895524. 096 |

|            |             |         |             |
|------------|-------------|---------|-------------|
| M256T638   | 256.0948439 | 637.996 | 25124149.33 |
| M256T169_2 | 256.0920053 | 169.221 | 26643520.9  |
| M256T234   | 256.0918855 | 234.447 | 118298370.8 |
| M256T393   | 256.1112486 | 392.715 | 742711115.5 |
| M256T106_1 | 256.1171547 | 105.503 | 243283206.7 |
| M256T128   | 256.1171761 | 127.944 | 1573769289  |
| M256T584_1 | 256.1170433 | 584.417 | 2593550.906 |
| M256T197   | 256.1158327 | 196.644 | 95928644.84 |
| M256T151   | 256.1172108 | 151.016 | 920618940.8 |
| M256T287   | 256.1265064 | 287.148 | 150025387.5 |
| M256T171   | 256.1267935 | 170.665 | 126702618.9 |
| M256T347   | 256.1264111 | 347.175 | 129179272.8 |
| M256T239   | 256.1312162 | 238.605 | 52621072.95 |
| M256T338   | 256.1297995 | 337.767 | 192946408.7 |
| M256T198   | 256.1267905 | 198.072 | 218112498.7 |
| M256T156   | 256.1296639 | 156.393 | 76508695.03 |
| M256T384   | 256.1324542 | 383.536 | 9511068.581 |
| M256T212   | 256.1297863 | 212.448 | 171531000.8 |
| M256T183   | 256.1381934 | 182.574 | 1436073.86  |
| M256T190   | 256.1380508 | 189.571 | 2689369.893 |
| M256T106_2 | 256.1375641 | 105.503 | 23464120.96 |
| M256T121   | 256.1367894 | 120.525 | 52052014.69 |
| M256T374   | 256.1372608 | 373.532 | 5077112.777 |
| M256T810   | 256.1464587 | 810.052 | 971595.4659 |
| M256T584_2 | 256.1531025 | 584.417 | 15993378.31 |
| M256T418   | 256.189914  | 417.676 | 6172200.91  |
| M256T425   | 256.189993  | 424.572 | 3348874.132 |
| M256T829   | 256.2260871 | 828.73  | 5772174.646 |
| M256T811_2 | 256.2260003 | 811.413 | 71285232.03 |
| M256T811_3 | 256.2628562 | 811.413 | 11805623.72 |
| M256T834   | 256.2990099 | 834.486 | 23576527.06 |
| M256T458   | 256.4456586 | 457.576 | 992847.7059 |
| M257T365   | 256.5685028 | 365.061 | 1358749.359 |
| M257T600   | 256.619841  | 599.621 | 1423957.17  |
| M257T57    | 256.9079362 | 57.4179 | 2548549.217 |
| M257T119   | 256.9764608 | 119.433 | 4387192.968 |
| M257T321   | 256.9975001 | 321.198 | 2626560.932 |
| M257T211   | 257.0056019 | 211.288 | 1539102.64  |
| M257T613   | 257.0404171 | 612.699 | 2620763.096 |
| M257T139   | 257.0590586 | 138.766 | 640497.2084 |
| M257T132   | 257.0589584 | 131.949 | 1038536.883 |
| M257T108   | 257.0647539 | 107.537 | 2941375.509 |
| M257T295   | 257.0634219 | 295.356 | 21048397.76 |
| M257T396   | 257.0652575 | 396.415 | 18835235.05 |
| M257T500   | 257.0790267 | 500.045 | 16465900.93 |
| M257T631   | 257.0799649 | 630.507 | 14377815.66 |
| M257T512   | 257.0790313 | 511.77  | 52803760.57 |
| M257T254   | 257.0756139 | 254.446 | 3355521.193 |
| M257T171_1 | 257.0837896 | 170.665 | 47276401.71 |
| M257T371   | 257.0838673 | 370.777 | 3265150.06  |
| M257T104_1 | 257.0836669 | 104.493 | 15366486.81 |
| M257T233   | 257.0945559 | 233.081 | 11190104.39 |
| M257T582   | 257.0977134 | 581.625 | 5007825.175 |
| M257T293   | 257.1123047 | 292.623 | 16045824.07 |



|            |              |          |              |
|------------|--------------|----------|--------------|
| M257T323   | 257. 1122695 | 322. 536 | 17868498. 78 |
| M257T214   | 257. 112448  | 213. 872 | 8285588. 259 |
| M257T104_2 | 257. 1147663 | 104. 493 | 28525017. 2  |
| M257T270   | 257. 122352  | 269. 528 | 5267629. 997 |
| M257T128   | 257. 1199878 | 127. 944 | 179681747. 2 |
| M257T393   | 257. 1196292 | 392. 715 | 72129188. 29 |
| M257T192   | 257. 124168  | 192. 437 | 63657816. 42 |
| M257T151   | 257. 1199812 | 151. 016 | 116906490. 3 |
| M257T309   | 257. 1266643 | 308. 967 | 5096946. 833 |
| M257T497   | 257. 1279752 | 497. 214 | 9523641. 096 |
| M257T180   | 257. 1271178 | 179. 75  | 23831987. 63 |
| M257T419   | 257. 1272039 | 418. 97  | 4310873. 893 |
| M257T287   | 257. 1312942 | 287. 148 | 18477486. 89 |
| M257T171_2 | 257. 1272671 | 170. 665 | 8077843. 524 |
| M257T338   | 257. 1316492 | 337. 767 | 20734508. 87 |
| M257T212   | 257. 1318089 | 212. 448 | 22297653. 36 |
| M257T347   | 257. 1316654 | 347. 175 | 14789593. 26 |
| M257T427   | 257. 1386376 | 427. 362 | 2724849. 04  |
| M257T469   | 257. 1460247 | 469. 252 | 25799728. 91 |
| M257T121   | 257. 1415136 | 120. 525 | 3314275. 875 |
| M257T98    | 257. 1484019 | 97. 7824 | 12805168. 56 |
| M257T104_3 | 257. 1483807 | 104. 493 | 38732782. 7  |
| M257T408   | 257. 1484047 | 407. 724 | 11585897. 66 |
| M257T304   | 257. 1484653 | 303. 513 | 8252128. 067 |
| M257T584   | 257. 1569279 | 584. 417 | 1577119. 84  |
| M257T302   | 257. 16022   | 302. 191 | 19433466. 53 |
| M257T533   | 257. 1738926 | 532. 526 | 2685213. 632 |
| M257T632   | 257. 1737682 | 631. 982 | 8687648. 35  |
| M257T563   | 257. 2248996 | 563. 297 | 26240467. 45 |
| M257T669   | 257. 2255689 | 668. 867 | 2879903. 679 |
| M257T649   | 257. 2247839 | 649. 338 | 17523548. 95 |
| M257T811   | 257. 2296028 | 811. 413 | 11283091. 64 |
| M257T703   | 257. 2247217 | 703. 35  | 14594179. 13 |
| M257T834   | 257. 3021384 | 834. 486 | 3633180. 867 |
| M258T746   | 257. 5710351 | 745. 603 | 1329152. 636 |
| M258T469_1 | 257. 6052196 | 469. 252 | 982234. 6309 |
| M258T469_2 | 257. 6448635 | 469. 252 | 5120805. 111 |
| M258T75    | 257. 9757247 | 74. 9588 | 172224272. 1 |
| M258T264   | 258. 0278017 | 264. 079 | 5288669. 737 |
| M258T122   | 258. 0484248 | 122. 007 | 34497632. 86 |
| M258T137   | 258. 0485327 | 137. 373 | 5863731. 068 |
| M258T111   | 258. 0483289 | 111. 382 | 42798120. 2  |
| M258T316_1 | 258. 060067  | 315. 701 | 5508099. 987 |
| M258T184   | 258. 0973214 | 183. 886 | 17425563. 09 |
| M258T369   | 258. 0958026 | 369. 321 | 17277257. 13 |
| M258T203   | 258. 0972298 | 203. 36  | 20878189. 04 |
| M258T293   | 258. 0965921 | 292. 623 | 8880506. 643 |
| M258T103   | 258. 0970814 | 103. 423 | 198285065. 9 |
| M258T143_1 | 258. 0973609 | 142. 85  | 17307396. 09 |
| M258T95    | 258. 0969534 | 94. 7467 | 38653772. 32 |
| M258T485   | 258. 0966834 | 485. 471 | 3998325. 967 |
| M258T316_2 | 258. 0957534 | 315. 701 | 10733208. 23 |
| M258T216   | 258. 0973404 | 216. 359 | 12943090. 4  |
| M258T158_1 | 258. 1063159 | 157. 773 | 46093926. 32 |

|            |              |          |              |
|------------|--------------|----------|--------------|
| M258T260   | 258. 1073849 | 259. 74  | 70329358. 9  |
| M258T229_1 | 258. 1084871 | 229. 059 | 9301920. 71  |
| M258T102   | 258. 1108627 | 102. 247 | 47435420. 24 |
| M258T143_2 | 258. 1106097 | 142. 85  | 14673703. 22 |
| M258T90    | 258. 1114852 | 89. 6999 | 1958065370   |
| M258T433   | 258. 1113406 | 433. 111 | 11278041. 44 |
| M258T443   | 258. 1115222 | 443. 256 | 19126432. 46 |
| M258T176   | 258. 1104089 | 175. 952 | 12256899. 87 |
| M258T212   | 258. 1087549 | 212. 448 | 6674645. 432 |
| M258T129   | 258. 1219761 | 129. 234 | 25478847. 08 |
| M258T393   | 258. 1192787 | 392. 715 | 6122809. 169 |
| M258T506   | 258. 1223073 | 505. 855 | 6186400. 935 |
| M258T229_2 | 258. 1329825 | 229. 059 | 10441600. 97 |
| M258T183   | 258. 1330122 | 182. 574 | 15319066. 84 |
| M258T475   | 258. 1329968 | 475. 007 | 4567275. 521 |
| M258T106_1 | 258. 132954  | 105. 503 | 68629143. 37 |
| M258T335   | 258. 1330264 | 334. 966 | 6954672. 404 |
| M258T143_3 | 258. 1331726 | 142. 85  | 23358306. 29 |
| M258T171   | 258. 1325814 | 170. 665 | 13648882. 19 |
| M258T504   | 258. 1336674 | 504. 466 | 4917043. 357 |
| M258T440   | 258. 1325919 | 440. 459 | 6601868. 426 |
| M258T568   | 258. 1328063 | 568. 464 | 2200995. 411 |
| M258T490   | 258. 1336147 | 489. 826 | 6912861. 741 |
| M258T211   | 258. 1330815 | 211. 288 | 9293329. 868 |
| M258T331   | 258. 1435928 | 330. 809 | 12525735. 46 |
| M258T158_2 | 258. 1437406 | 157. 773 | 17984371. 06 |
| M258T345   | 258. 1438678 | 344. 555 | 6396352. 406 |
| M258T318   | 258. 1421268 | 318. 497 | 10360138. 23 |
| M258T305   | 258. 1447069 | 304. 777 | 20521878. 36 |
| M258T750   | 258. 1472362 | 749. 96  | 5246757. 224 |
| M258T106_2 | 258. 143652  | 105. 503 | 16893335. 07 |
| M258T328   | 258. 1682799 | 328. 106 | 2935578. 053 |
| M258T358   | 258. 1685629 | 357. 958 | 4646736. 044 |
| M258T474   | 258. 2047347 | 473. 597 | 52887043. 4  |
| M258T594   | 258. 2048434 | 593. 62  | 3191470. 637 |
| M258T649   | 258. 2287473 | 649. 338 | 1876759. 037 |
| M258T773   | 258. 2785301 | 773. 437 | 13163682. 66 |
| M259T123   | 258. 5511286 | 123. 262 | 4679807. 496 |
| M259T111   | 258. 5512286 | 111. 382 | 9011663. 4   |
| M259T427   | 258. 5672199 | 427. 362 | 2471211. 223 |
| M259T314_1 | 258. 8193996 | 314. 259 | 5477196. 888 |
| M259T82    | 258. 8957697 | 82. 0569 | 75344603. 63 |
| M259T176_1 | 258. 955833  | 175. 952 | 2871390. 279 |
| M259T75    | 258. 976912  | 74. 9588 | 22537033. 16 |
| M259T211_1 | 258. 9763879 | 211. 288 | 5370197. 309 |
| M259T211_2 | 259. 0279821 | 211. 288 | 7854501. 019 |
| M259T456   | 259. 0800634 | 456. 126 | 1628660. 848 |
| M259T158   | 259. 0796143 | 157. 773 | 36863527. 25 |
| M259T190_1 | 259. 0791145 | 189. 571 | 29893110. 71 |
| M259T293_1 | 259. 0774813 | 292. 623 | 95467005. 4  |
| M259T106_1 | 259. 0805788 | 105. 503 | 181844015. 9 |
| M259T199   | 259. 0791244 | 199. 43  | 25801177. 77 |
| M259T181   | 259. 0791231 | 181. 154 | 22290969. 82 |
| M259T670   | 259. 0797443 | 670. 166 | 9459187. 863 |

|            |             |         |             |
|------------|-------------|---------|-------------|
| M259T143   | 259.0806666 | 142.85  | 43325265.2  |
| M259T620   | 259.0820208 | 620.172 | 18879919.02 |
| M259T121   | 259.0805893 | 120.525 | 31722158.02 |
| M259T210   | 259.0791995 | 210.186 | 20827610.05 |
| M259T171   | 259.080564  | 170.665 | 16509027.12 |
| M259T93    | 259.0797478 | 92.7272 | 31093187.37 |
| M259T545   | 259.0801325 | 545.203 | 24299243.14 |
| M259T632   | 259.0818158 | 631.982 | 7868502.515 |
| M259T90_1  | 259.0907188 | 89.6999 | 224328283.1 |
| M259T237   | 259.0913655 | 237.171 | 42756179.65 |
| M259T176_2 | 259.0915386 | 175.952 | 3246456111  |
| M259T104   | 259.0939824 | 104.493 | 24736368.9  |
| M259T159_1 | 259.1109726 | 159.017 | 3055987.432 |
| M259T258   | 259.1106366 | 258.489 | 5793823.285 |
| M259T90_2  | 259.1111079 | 89.6999 | 147202397.3 |
| M259T468   | 259.1072613 | 467.706 | 2632390.779 |
| M259T144   | 259.1276807 | 143.959 | 21386050.78 |
| M259T106_2 | 259.127657  | 105.503 | 34935289.23 |
| M259T188   | 259.127011  | 188.126 | 60550641.12 |
| M259T159_2 | 259.1280376 | 159.017 | 19177332.98 |
| M259T334   | 259.1280436 | 333.715 | 236291669   |
| M259T297   | 259.1280751 | 296.739 | 67125352.38 |
| M259T169   | 259.1280916 | 169.221 | 12875162.29 |
| M259T91    | 259.1280256 | 90.7088 | 30073790.5  |
| M259T293_2 | 259.1390374 | 292.623 | 30117388.15 |
| M259T411   | 259.142332  | 410.542 | 23145228.65 |
| M259T314_2 | 259.138854  | 314.259 | 21894552.79 |
| M259T190_2 | 259.1388968 | 189.571 | 10898438.16 |
| M259T106_3 | 259.1386294 | 105.503 | 23864539.39 |
| M259T232   | 259.1390191 | 231.773 | 7186245.428 |
| M259T167   | 259.1389084 | 166.613 | 65667193.37 |
| M259T90_3  | 259.1387942 | 89.6999 | 64143356.29 |
| M259T403   | 259.163628  | 403.447 | 17171820.01 |
| M259T429   | 259.1645633 | 428.735 | 13441789.16 |
| M259T809   | 259.1678153 | 808.678 | 5191621.961 |
| M259T830   | 259.1662784 | 830.193 | 14404837.11 |
| M259T777   | 259.1671493 | 777.245 | 108457906.3 |
| M259T563   | 259.2047664 | 563.297 | 18602546.09 |
| M259T712   | 259.2368664 | 711.984 | 3042780.339 |
| M260T411   | 259.6419289 | 410.542 | 5557098.43  |
| M260T82    | 259.9014004 | 82.0569 | 2865675.965 |
| M260T211   | 259.9844795 | 211.288 | 2667548.422 |
| M260T68    | 259.9995972 | 68.0903 | 565551.7363 |
| M260T62    | 259.9995723 | 62.1777 | 941748.3371 |
| M260T37    | 259.9997209 | 37.1891 | 9106693.056 |
| M260T51    | 259.9996732 | 51.1942 | 2241481.813 |
| M260T75    | 260.0091511 | 74.9588 | 12912694.49 |
| M260T332   | 260.0761326 | 332.2   | 8225932.13  |
| M260T350   | 260.0746584 | 349.911 | 28438585.96 |
| M260T91    | 260.0752212 | 90.7088 | 13523827.38 |
| M260T198   | 260.0756156 | 198.072 | 2958388.5   |
| M260T313   | 260.0760291 | 312.85  | 3644884.439 |
| M260T266   | 260.0755946 | 265.624 | 6059664.687 |
| M260T324   | 260.0761706 | 323.984 | 7573341.248 |

|            |              |          |              |
|------------|--------------|----------|--------------|
| M260T293   | 260. 0833902 | 292. 623 | 8464934. 787 |
| M260T106   | 260. 0836654 | 105. 503 | 17377205. 43 |
| M260T351   | 260. 090972  | 351. 348 | 22271301. 56 |
| M260T574   | 260. 0909823 | 574. 363 | 4370132. 821 |
| M260T389   | 260. 0910059 | 389. 035 | 3373331. 903 |
| M260T90    | 260. 0942922 | 89. 6999 | 17725148. 43 |
| M260T176   | 260. 0930614 | 175. 952 | 336147675    |
| M260T477   | 260. 1138075 | 476. 554 | 2685549. 074 |
| M260T158_1 | 260. 1119134 | 157. 773 | 337001787. 2 |
| M260T294   | 260. 1119541 | 293. 896 | 33786002. 29 |
| M260T116   | 260. 1118879 | 115. 522 | 234371726. 5 |
| M260T405   | 260. 111963  | 404. 872 | 8831594. 582 |
| M260T104_1 | 260. 1118719 | 104. 493 | 636085313    |
| M260T190   | 260. 1229477 | 189. 571 | 14881448. 93 |
| M260T239   | 260. 1229934 | 238. 605 | 4683990. 196 |
| M260T215   | 260. 1229583 | 215. 068 | 4767701. 409 |
| M260T418   | 260. 1277815 | 417. 676 | 36982797. 73 |
| M260T471   | 260. 1283515 | 470. 602 | 2290972. 916 |
| M260T155   | 260. 1230849 | 155. 197 | 15364008. 58 |
| M260T334   | 260. 133464  | 333. 715 | 22359459. 31 |
| M260T158_2 | 260. 1438321 | 157. 773 | 5849368. 863 |
| M260T475   | 260. 1417788 | 475. 007 | 855679. 4182 |
| M260T167   | 260. 1433212 | 166. 613 | 4909705. 877 |
| M260T135   | 260. 1437996 | 134. 574 | 5518263. 362 |
| M260T123   | 260. 1438523 | 123. 262 | 3141714. 327 |
| M260T98    | 260. 1489318 | 97. 7824 | 30504010. 06 |
| M260T147   | 260. 147743  | 146. 742 | 13272357. 87 |
| M260T104_2 | 260. 1476885 | 104. 493 | 43480387. 45 |
| M260T502   | 260. 1508726 | 501. 549 | 1703127. 971 |
| M260T288   | 260. 1591916 | 288. 481 | 17793924. 89 |
| M260T219   | 260. 1596883 | 219. 233 | 16410487. 81 |
| M260T374   | 260. 1751677 | 373. 532 | 6790737. 85  |
| M260T393   | 260. 1846056 | 392. 715 | 11424934. 5  |
| M260T549   | 260. 1850314 | 549. 375 | 15385062. 99 |
| M260T232   | 260. 1956078 | 231. 773 | 19812215. 68 |
| M261T82    | 260. 8960433 | 82. 0569 | 12443243. 25 |
| M261T39    | 260. 9240313 | 39. 4128 | 8707336. 394 |
| M261T63    | 260. 9234043 | 63. 4448 | 2697144. 5   |
| M261T252   | 261. 0080549 | 251. 555 | 969267. 3527 |
| M261T160   | 261. 0079445 | 160. 369 | 3746736. 728 |
| M261T168_1 | 261. 0080213 | 167. 804 | 6979740. 587 |
| M261T101   | 261. 0352518 | 101. 161 | 69296814. 83 |
| M261T117   | 261. 0354653 | 116. 689 | 29364866. 62 |
| M261T143_1 | 261. 0354614 | 142. 85  | 6105846. 131 |
| M261T91    | 261. 0349952 | 90. 7088 | 210063776. 2 |
| M261T294   | 261. 0594437 | 293. 896 | 3345697. 254 |
| M261T106_1 | 261. 059344  | 105. 503 | 26220793. 45 |
| M261T143_2 | 261. 059488  | 142. 85  | 12766617. 58 |
| M261T168_2 | 261. 0595777 | 167. 804 | 9777262. 434 |
| M261T116   | 261. 0595185 | 115. 522 | 24206167. 62 |
| M261T451   | 261. 0848085 | 450. 503 | 22861901. 39 |
| M261T350   | 261. 0786366 | 349. 911 | 2736885. 884 |
| M261T393   | 261. 0919167 | 392. 715 | 13434129. 98 |
| M261T351   | 261. 0952132 | 351. 348 | 4052672. 522 |

|            |              |          |              |
|------------|--------------|----------|--------------|
| M261T332   | 261. 096451  | 332. 2   | 3685927. 627 |
| M261T293   | 261. 0955228 | 292. 623 | 6225158. 436 |
| M261T106_2 | 261. 0959283 | 105. 503 | 9977663. 448 |
| M261T176   | 261. 0961867 | 175. 952 | 44945499. 56 |
| M261T286_1 | 261. 1066704 | 285. 9   | 2716185. 705 |
| M261T92    | 261. 107178  | 91. 7174 | 18641376. 35 |
| M261T276   | 261. 1073694 | 276. 414 | 3727846. 358 |
| M261T161   | 261. 1150613 | 161. 494 | 6348607. 599 |
| M261T461   | 261. 1224969 | 460. 537 | 2914906. 229 |
| M261T143_3 | 261. 1166316 | 142. 85  | 10596138. 52 |
| M261T442   | 261. 1224098 | 442. 005 | 6774643. 444 |
| M261T426   | 261. 1223307 | 425. 909 | 23316544. 2  |
| M261T104_1 | 261. 1151929 | 104. 493 | 76101761. 37 |
| M261T415   | 261. 123118  | 414. 82  | 4614554. 183 |
| M261T190   | 261. 144378  | 189. 571 | 19246967. 28 |
| M261T310   | 261. 1428653 | 310. 075 | 29409364. 69 |
| M261T286_2 | 261. 1434124 | 285. 9   | 11425241. 56 |
| M261T260   | 261. 1444847 | 259. 74  | 14116639. 4  |
| M261T298   | 261. 1428949 | 298. 135 | 32179920. 39 |
| M261T361   | 261. 1443222 | 360. 794 | 4348894. 55  |
| M261T406   | 261. 1433992 | 406. 289 | 31785664. 63 |
| M261T345   | 261. 1476176 | 344. 555 | 8787316. 552 |
| M261T104_2 | 261. 1535998 | 104. 493 | 49472717. 25 |
| M261T764   | 261. 1835302 | 763. 856 | 422303978. 6 |
| M261T626   | 261. 1844715 | 626. 042 | 47658159. 61 |
| M261T824   | 261. 1835101 | 824. 311 | 15975158. 18 |
| M261T753   | 261. 1834708 | 752. 541 | 458401376    |
| M261T652   | 261. 1843842 | 651. 956 | 45213582. 2  |
| M261T800   | 261. 1861294 | 800. 484 | 464994487. 9 |
| M261T582   | 261. 194925  | 581. 625 | 735987. 2532 |
| M261T233   | 261. 1995001 | 233. 081 | 1616659. 355 |
| M261T649   | 261. 2200662 | 649. 338 | 3552253. 512 |
| M261T702   | 261. 2200501 | 702. 055 | 7631032. 863 |
| M261T562   | 261. 2205817 | 561. 955 | 24619251. 06 |
| M262T169   | 261. 5421439 | 169. 221 | 52206657. 47 |
| M262T503   | 261. 5852229 | 503. 046 | 7777844. 497 |
| M262T477   | 261. 6148648 | 476. 554 | 991579. 2752 |
| M262T626   | 261. 6301391 | 626. 042 | 1208219. 187 |
| M262T264   | 261. 9753511 | 264. 079 | 3303081. 298 |
| M262T147   | 262. 0550563 | 146. 742 | 3119719. 892 |
| M262T709   | 262. 0538954 | 709. 106 | 3067372. 506 |
| M262T160   | 262. 0657207 | 160. 369 | 5255802. 935 |
| M262T101   | 262. 0906929 | 101. 161 | 26511934. 19 |
| M262T328   | 262. 0916134 | 328. 106 | 24241920. 23 |
| M262T143_1 | 262. 091561  | 142. 85  | 10717508. 03 |
| M262T320   | 262. 0915927 | 319. 758 | 7388623. 023 |
| M262T216   | 262. 091532  | 216. 359 | 8056879. 346 |
| M262T347   | 262. 0916032 | 347. 175 | 19825472. 71 |
| M262T92    | 262. 1021993 | 91. 7174 | 61202174. 21 |
| M262T353   | 262. 1062898 | 352. 65  | 5741764. 081 |
| M262T439   | 262. 1064966 | 439. 021 | 3056097. 4   |
| M262T390   | 262. 1066813 | 390. 432 | 18873381. 14 |
| M262T604   | 262. 1063996 | 603. 95  | 2560842. 342 |
| M262T427   | 262. 1274672 | 427. 362 | 4537441. 353 |

|            |              |          |              |
|------------|--------------|----------|--------------|
| M262T468   | 262. 1270345 | 467. 706 | 9229803. 648 |
| M262T318   | 262. 1268293 | 318. 497 | 10847000. 33 |
| M262T164   | 262. 1300594 | 163. 846 | 50032194. 4  |
| M262T128   | 262. 1277668 | 127. 944 | 158354159. 5 |
| M262T143_2 | 262. 1277921 | 142. 85  | 315593620. 3 |
| M262T592   | 262. 1322416 | 592. 067 | 2455428. 568 |
| M262T359   | 262. 1344782 | 359. 32  | 2146551. 505 |
| M262T113   | 262. 1277253 | 112. 781 | 159107423. 7 |
| M262T211   | 262. 1388687 | 211. 288 | 2733841. 461 |
| M262T445   | 262. 1433061 | 444. 725 | 1967652. 398 |
| M262T78    | 262. 1504554 | 78. 3841 | 1414748. 351 |
| M262T310   | 262. 1508816 | 310. 075 | 9677565. 241 |
| M262T504   | 262. 1535934 | 504. 466 | 9951267. 421 |
| M262T432   | 262. 1648566 | 431. 64  | 3155836. 301 |
| M262T531   | 262. 1640217 | 531. 127 | 2471440. 84  |
| M262T583   | 262. 1640647 | 583. 068 | 3488735. 195 |
| M262T369   | 262. 1686819 | 369. 321 | 1151588. 455 |
| M262T698   | 262. 1786005 | 697. 952 | 15394616. 47 |
| M262T683   | 262. 1785347 | 683. 436 | 7568618. 541 |
| M262T777   | 262. 1775061 | 777. 245 | 16996135. 31 |
| M262T817   | 262. 1776737 | 816. 953 | 56195029. 41 |
| M262T764   | 262. 1867527 | 763. 856 | 75585296. 45 |
| M262T753   | 262. 186914  | 752. 541 | 80257856. 07 |
| M262T652   | 262. 1861391 | 651. 956 | 6418509. 924 |
| M262T810   | 262. 1886111 | 810. 052 | 7719195. 499 |
| M262T800   | 262. 1890439 | 800. 484 | 75737193. 52 |
| M262T791   | 262. 2521399 | 790. 802 | 2801570. 959 |
| M263T405   | 262. 5927916 | 404. 872 | 4804958. 323 |
| M263T266   | 262. 9836269 | 265. 624 | 2761853. 354 |
| M263T323   | 263. 0600129 | 322. 536 | 3024184. 434 |
| M263T316   | 263. 0590647 | 315. 701 | 4021152. 572 |
| M263T302   | 263. 0590741 | 302. 191 | 7478247. 202 |
| M263T150   | 263. 060547  | 149. 65  | 24468022. 92 |
| M263T164   | 263. 0715488 | 163. 846 | 22015685. 4  |
| M263T144   | 263. 0751986 | 143. 959 | 7007709. 199 |
| M263T298   | 263. 0750907 | 298. 135 | 7649274. 191 |
| M263T305   | 263. 0751516 | 304. 777 | 6162870. 326 |
| M263T181   | 263. 0751739 | 181. 154 | 8896985. 7   |
| M263T313   | 263. 0751553 | 312. 85  | 12065029. 96 |
| M263T102   | 263. 086289  | 102. 247 | 29397562. 39 |
| M263T121   | 263. 0862859 | 120. 525 | 21782908. 63 |
| M263T143_1 | 263. 085945  | 142. 85  | 44669446. 47 |
| M263T419   | 263. 0975938 | 418. 97  | 3549026. 372 |
| M263T408   | 263. 1015143 | 407. 724 | 7076773. 527 |
| M263T152   | 263. 1020034 | 152. 375 | 5138395. 296 |
| M263T445   | 263. 1014984 | 444. 725 | 23851455. 16 |
| M263T512   | 263. 1019569 | 511. 77  | 1313800. 12  |
| M263T219   | 263. 101428  | 219. 233 | 1555982. 021 |
| M263T390   | 263. 1085626 | 390. 432 | 2717447. 113 |
| M263T90    | 263. 1227943 | 89. 6999 | 62387887. 21 |
| M263T660   | 263. 1264147 | 660. 455 | 3754833. 348 |
| M263T143_2 | 263. 1307098 | 142. 85  | 35535154. 88 |
| M263T113   | 263. 1308762 | 112. 781 | 17650735. 35 |
| M263T459   | 263. 1388072 | 458. 985 | 6852944. 121 |

|          |              |          |              |
|----------|--------------|----------|--------------|
| M263T325 | 263. 1361903 | 325. 35  | 4710304. 136 |
| M263T422 | 263. 1388116 | 421. 784 | 24067618. 44 |
| M263T341 | 263. 1399636 | 340. 548 | 5907527. 488 |
| M263T438 | 263. 1388814 | 437. 571 | 23250560. 82 |
| M263T399 | 263. 1438134 | 399. 046 | 3587584. 672 |
| M263T412 | 263. 1438833 | 411. 838 | 4664567. 623 |
| M263T462 | 263. 1512947 | 461. 845 | 1962883. 748 |
| M263T32  | 263. 1622809 | 32. 4171 | 4869613. 739 |
| M263T792 | 263. 1995974 | 792. 146 | 11405913. 06 |
| M263T836 | 263. 2354925 | 836. 034 | 8255445. 523 |
| M264T412 | 263. 6827231 | 411. 838 | 8727671. 048 |
| M264T75  | 263. 9312947 | 74. 9588 | 12831392. 95 |
| M264T117 | 264. 0480842 | 116. 689 | 3084825. 314 |
| M264T206 | 264. 0484083 | 205. 903 | 15103760. 43 |
| M264T123 | 264. 0480216 | 123. 262 | 4836540. 081 |
| M264T264 | 264. 0700233 | 264. 079 | 11139820. 11 |
| M264T519 | 264. 0739588 | 519. 257 | 13648621. 92 |
| M264T230 | 264. 0705431 | 230. 321 | 11640307. 82 |
| M264T135 | 264. 0741942 | 134. 574 | 10196715. 02 |
| M264T100 | 264. 0703904 | 100. 146 | 208489912. 8 |
| M264T218 | 264. 0705763 | 217. 866 | 13010215. 13 |
| M264T118 | 264. 0743469 | 118. 116 | 24867005. 23 |
| M264T209 | 264. 0704955 | 208. 905 | 12925576. 42 |
| M264T207 | 264. 0969362 | 207. 393 | 54375581. 5  |
| M264T198 | 264. 0969148 | 198. 072 | 17666470. 21 |
| M264T164 | 264. 1070434 | 163. 846 | 22101943. 72 |
| M264T143 | 264. 1069729 | 142. 85  | 26500855. 75 |
| M264T93  | 264. 1071066 | 92. 7272 | 2451652874   |
| M264T321 | 264. 1066599 | 321. 198 | 4342693. 843 |
| M264T178 | 264. 1064841 | 178. 408 | 7006829. 96  |
| M264T626 | 264. 1223242 | 626. 042 | 3754244. 463 |
| M264T537 | 264. 12196   | 536. 761 | 3221363. 808 |
| M264T253 | 264. 122299  | 253. 024 | 4604089. 291 |
| M264T382 | 264. 1221793 | 382. 125 | 5458721. 017 |
| M264T610 | 264. 1223646 | 609. 592 | 5331255. 16  |
| M264T567 | 264. 1222794 | 567. 1   | 3789968. 887 |
| M264T453 | 264. 133557  | 453. 317 | 3736769. 356 |
| M264T314 | 264. 1427492 | 314. 259 | 53058971. 12 |
| M264T192 | 264. 1440683 | 192. 437 | 15113810. 92 |
| M264T384 | 264. 1432725 | 383. 536 | 48486749. 74 |
| M264T104 | 264. 1432875 | 104. 493 | 9701042. 857 |
| M264T284 | 264. 1436444 | 284. 377 | 10521879. 77 |
| M264T406 | 264. 1599335 | 406. 289 | 848389. 0344 |
| M264T419 | 264. 1827628 | 418. 97  | 16152161. 02 |
| M264T638 | 264. 1946374 | 637. 996 | 23365185. 54 |
| M264T616 | 264. 1941088 | 615. 594 | 137427163. 8 |
| M264T651 | 264. 1945378 | 650. 898 | 16848124. 57 |
| M264T777 | 264. 1946746 | 777. 245 | 14013641. 05 |
| M265T519 | 264. 5764041 | 519. 257 | 2694715. 679 |
| M265T600 | 264. 6079696 | 599. 621 | 22534744. 25 |
| M265T75  | 265. 0126903 | 74. 9588 | 1338958955   |
| M265T547 | 265. 0233299 | 546. 651 | 24303366. 16 |
| M265T346 | 265. 0673484 | 345. 848 | 286031443. 3 |
| M265T101 | 265. 0733448 | 101. 161 | 19090901. 32 |

|            |             |         |             |
|------------|-------------|---------|-------------|
| M265T439   | 265.0693814 | 439.021 | 16510899.66 |
| M265T595   | 265.0897724 | 595.066 | 10656287.43 |
| M265T332   | 265.0908562 | 332.2   | 19185718.19 |
| M265T534   | 265.0949534 | 533.958 | 174312386.6 |
| M265T128   | 265.0908449 | 127.944 | 14337964.15 |
| M265T103   | 265.090857  | 103.423 | 28468620.77 |
| M265T301   | 265.0908754 | 300.782 | 14211656.69 |
| M265T206   | 265.1000484 | 205.903 | 6844319.432 |
| M265T92    | 265.109233  | 91.7174 | 278846599.4 |
| M265T184   | 265.1169798 | 183.886 | 8253189.376 |
| M265T203_1 | 265.1168687 | 203.36  | 11307426.28 |
| M265T496   | 265.1173545 | 495.779 | 5607608.891 |
| M265T282   | 265.1174982 | 281.666 | 15959208.23 |
| M265T323   | 265.1174381 | 322.536 | 15436109.2  |
| M265T482   | 265.1174603 | 482.436 | 7371288.401 |
| M265T347   | 265.1175477 | 347.175 | 12596039.42 |
| M265T610   | 265.1253746 | 609.592 | 878155.0635 |
| M265T203_2 | 265.1286437 | 203.36  | 7378906.832 |
| M265T405_1 | 265.128788  | 404.872 | 14420539.04 |
| M265T423   | 265.1286057 | 423.199 | 64863890.29 |
| M265T327   | 265.1279839 | 326.78  | 9042625.153 |
| M265T472   | 265.1425112 | 472.132 | 15409920.56 |
| M265T88    | 265.1385523 | 87.6739 | 26300199.85 |
| M265T613   | 265.1422761 | 612.699 | 7310639.794 |
| M265T256   | 265.1389403 | 255.723 | 3795714.955 |
| M265T734   | 265.1419205 | 734.269 | 5563010.229 |
| M265T635   | 265.1420191 | 635.022 | 10025947.55 |
| M265T405_2 | 265.1413637 | 404.872 | 20390675.85 |
| M265T382   | 265.1492655 | 382.125 | 5669520.152 |
| M265T313   | 265.1471453 | 312.85  | 6356464.09  |
| M265T411   | 265.154299  | 410.542 | 35561802.36 |
| M265T422   | 265.154156  | 421.784 | 24291790.84 |
| M265T394   | 265.1533089 | 393.934 | 16578352.43 |
| M265T443   | 265.1543697 | 443.256 | 51476750.23 |
| M265T469   | 265.1645594 | 469.252 | 9225784.568 |
| M265T76    | 265.1743974 | 76.0874 | 13345045.84 |
| M265T616   | 265.1928615 | 615.594 | 6959770.237 |
| M265T608   | 265.1924746 | 608.261 | 3166517.787 |
| M266T357_1 | 265.6698883 | 356.74  | 8941036.161 |
| M266T75    | 266.0148622 | 74.9588 | 417533557.9 |
| M266T201   | 266.0126937 | 200.766 | 3094195.685 |
| M266T321   | 266.0132527 | 321.198 | 10800010.54 |
| M266T218   | 266.0324102 | 217.866 | 1487385.217 |
| M266T409_1 | 266.0672397 | 409.271 | 2652734.45  |
| M266T346   | 266.0716833 | 345.848 | 25203442.75 |
| M266T274   | 266.0872375 | 273.531 | 9930975.212 |
| M266T328   | 266.101618  | 328.106 | 7510974.334 |
| M266T534   | 266.1006326 | 533.958 | 30982984.97 |
| M266T524   | 266.1012514 | 523.735 | 7143639.666 |
| M266T209   | 266.1012567 | 208.905 | 8489100.184 |
| M266T234   | 266.1015883 | 234.447 | 11468320.41 |
| M266T301   | 266.1016846 | 300.782 | 9848816.415 |
| M266T584   | 266.1164881 | 584.417 | 2344298.861 |
| M266T345   | 266.1129786 | 344.555 | 11895210.38 |



|            |              |          |              |
|------------|--------------|----------|--------------|
| M266T361   | 266. 1130002 | 360. 794 | 16056511. 71 |
| M266T159   | 266. 1213107 | 159. 017 | 12111213. 69 |
| M266T294   | 266. 1233798 | 293. 896 | 2735829. 914 |
| M266T143   | 266. 1215435 | 142. 85  | 14464065. 94 |
| M266T171   | 266. 1218751 | 170. 665 | 2594132. 865 |
| M266T94    | 266. 1212558 | 93. 7378 | 8425987495   |
| M266T118   | 266. 1202589 | 118. 116 | 52086113. 6  |
| M266T219   | 266. 1222143 | 219. 233 | 4153117. 84  |
| M266T353   | 266. 1376474 | 352. 65  | 6728544. 601 |
| M266T409_2 | 266. 1377819 | 409. 271 | 3632241. 209 |
| M266T388   | 266. 1342248 | 387. 763 | 1851896. 145 |
| M266T395   | 266. 1376617 | 395. 264 | 3930704. 081 |
| M266T381   | 266. 1374012 | 380. 63  | 4691134. 913 |
| M266T499   | 266. 1377399 | 498. 645 | 11932983. 69 |
| M266T339   | 266. 1373126 | 339. 085 | 6105569. 386 |
| M266T362   | 266. 1332004 | 362. 146 | 3495622. 513 |
| M266T423   | 266. 1333727 | 423. 199 | 8325623. 406 |
| M266T418   | 266. 1499401 | 417. 676 | 5179372. 149 |
| M266T405   | 266. 1500438 | 404. 872 | 2624735. 195 |
| M266T751   | 266. 1502082 | 751. 333 | 7827366. 452 |
| M266T347   | 266. 1487996 | 347. 175 | 44748854. 58 |
| M266T230   | 266. 1601009 | 230. 321 | 7887299. 945 |
| M266T357_2 | 266. 1707704 | 356. 74  | 2463171. 192 |
| M266T443   | 266. 1743536 | 443. 256 | 2787599. 283 |
| M266T697   | 266. 171689  | 696. 575 | 53289674. 98 |
| M266T403   | 266. 1973318 | 403. 447 | 4546301. 095 |
| M266T95    | 266. 264484  | 94. 7467 | 6552629. 352 |
| M267T60    | 266. 9363335 | 59. 9075 | 1244360. 027 |
| M267T37    | 266. 937215  | 37. 1891 | 4132362. 58  |
| M267T67    | 266. 9363598 | 66. 9841 | 588934. 4476 |
| M267T358   | 266. 9805596 | 357. 958 | 9585287. 103 |
| M267T348   | 267. 0051348 | 348. 488 | 3458244. 011 |
| M267T74    | 267. 0109125 | 73. 8324 | 387564905. 4 |
| M267T139   | 267. 0279356 | 138. 766 | 4281843. 218 |
| M267T332   | 267. 0859421 | 332. 2   | 13221662. 72 |
| M267T416   | 267. 0973638 | 416. 239 | 6307568. 738 |
| M267T482   | 267. 1219643 | 482. 436 | 8493534. 986 |
| M267T583   | 267. 1193447 | 583. 068 | 8523742. 082 |
| M267T94    | 267. 1255469 | 93. 7378 | 953214896. 5 |
| M267T496_1 | 267. 1338485 | 495. 779 | 3257317. 808 |
| M267T106   | 267. 1318744 | 105. 503 | 12266491. 75 |
| M267T335   | 267. 132878  | 334. 966 | 18491537. 49 |
| M267T371   | 267. 1328876 | 370. 777 | 5801650. 966 |
| M267T433   | 267. 1329694 | 433. 111 | 4966046. 183 |
| M267T402   | 267. 1332661 | 401. 963 | 13935298. 66 |
| M267T392   | 267. 1443159 | 391. 678 | 93959523. 93 |
| M267T401   | 267. 1442837 | 400. 59  | 123919496. 3 |
| M267T347   | 267. 1489843 | 347. 175 | 9379217. 579 |
| M267T90    | 267. 1617583 | 89. 6999 | 24041707. 68 |
| M267T85    | 267. 1617631 | 84. 5768 | 13737415. 75 |
| M267T409   | 267. 1701591 | 409. 271 | 3700668. 916 |
| M267T496_2 | 267. 169622  | 495. 779 | 3504684. 078 |
| M267T503   | 267. 1697732 | 503. 046 | 2423383. 316 |
| M267T472   | 267. 1696723 | 472. 132 | 2510167. 888 |

|            |              |          |              |
|------------|--------------|----------|--------------|
| M267T697   | 267. 1748007 | 696. 575 | 6276776. 342 |
| M267T555   | 267. 1809858 | 555. 358 | 2370902. 299 |
| M267T633   | 267. 194655  | 633. 476 | 1034648. 761 |
| M267T562   | 267. 2095783 | 561. 955 | 10104074. 72 |
| M268T68    | 267. 900212  | 68. 0903 | 3321129. 904 |
| M268T42    | 267. 9003838 | 41. 798  | 11446651. 57 |
| M268T290_1 | 267. 9613883 | 289. 912 | 6153349. 048 |
| M268T185   | 268. 0655818 | 185. 398 | 6246818. 916 |
| M268T143   | 268. 0806022 | 142. 85  | 7067434. 47  |
| M268T576   | 268. 0841986 | 575. 878 | 2980506. 269 |
| M268T353   | 268. 0915529 | 352. 65  | 8939556. 273 |
| M268T311   | 268. 1023376 | 311. 445 | 93915646. 26 |
| M268T102   | 268. 1002907 | 102. 247 | 107998803. 8 |
| M268T290_2 | 268. 1020721 | 289. 912 | 5156553270   |
| M268T89    | 268. 1002633 | 88. 6838 | 1423143428   |
| M268T211   | 268. 1024338 | 211. 288 | 3240504. 815 |
| M268T309   | 268. 1169074 | 308. 967 | 11290600. 67 |
| M268T456   | 268. 1163786 | 456. 126 | 7333210. 45  |
| M268T472   | 268. 1167424 | 472. 132 | 7920020. 784 |
| M268T374   | 268. 1168179 | 373. 532 | 4929511. 202 |
| M268T192   | 268. 1168045 | 192. 437 | 22330474. 42 |
| M268T440   | 268. 1167232 | 440. 459 | 5833493. 853 |
| M268T625   | 268. 116969  | 624. 608 | 2353419. 454 |
| M268T299   | 268. 1168553 | 299. 493 | 11765366. 86 |
| M268T94    | 268. 126036  | 93. 7378 | 130553238. 9 |
| M268T218_1 | 268. 128408  | 217. 866 | 17823652. 73 |
| M268T313   | 268. 1283005 | 312. 85  | 10643910. 35 |
| M268T358   | 268. 1346909 | 357. 958 | 814322. 4962 |
| M268T159   | 268. 1388544 | 159. 017 | 11955950. 12 |
| M268T203   | 268. 1387537 | 203. 36  | 2544465. 227 |
| M268T335_1 | 268. 1357019 | 334. 966 | 1617512. 795 |
| M268T169   | 268. 1385073 | 169. 221 | 6323539. 817 |
| M268T136   | 268. 1378295 | 135. 971 | 18379853. 29 |
| M268T401   | 268. 148546  | 400. 59  | 14921962. 47 |
| M268T218_2 | 268. 1387147 | 217. 866 | 7531354. 036 |
| M268T411   | 268. 1534836 | 410. 542 | 3543793. 206 |
| M268T367_1 | 268. 1535057 | 366. 514 | 3503007201   |
| M268T335_2 | 268. 1533922 | 334. 966 | 5679983. 415 |
| M268T320   | 268. 1533348 | 319. 758 | 5120578. 547 |
| M268T384   | 268. 1534344 | 383. 536 | 45507035. 46 |
| M268T753   | 268. 1875684 | 752. 541 | 6586233. 847 |
| M268T817   | 268. 2262417 | 816. 953 | 10662196. 45 |
| M268T288   | 268. 243607  | 288. 481 | 3006612. 93  |
| M268T367_2 | 268. 2987815 | 366. 514 | 3401055. 871 |
| M269T316_1 | 268. 6394766 | 315. 701 | 6352035. 368 |
| M269T359   | 269. 0201517 | 359. 32  | 4235396. 672 |
| M269T413   | 269. 0647848 | 413. 295 | 2432075. 557 |
| M269T126   | 269. 059389  | 125. 598 | 1499848. 627 |
| M269T402   | 269. 0646099 | 401. 963 | 4987299. 36  |
| M269T302   | 269. 0894662 | 302. 191 | 23437962. 77 |
| M269T719   | 269. 0908839 | 719. 215 | 2774284. 715 |
| M269T513_1 | 269. 1000916 | 513. 285 | 15276094. 23 |
| M269T449   | 269. 1017349 | 448. 978 | 2652041. 482 |
| M269T425   | 269. 1006901 | 424. 572 | 2836737. 95  |

|            |              |          |              |
|------------|--------------|----------|--------------|
| M269T290   | 269. 1081431 | 289. 912 | 551356464. 7 |
| M269T106_1 | 269. 1093311 | 105. 503 | 49133771. 2  |
| M269T89    | 269. 1034228 | 88. 6838 | 131539668. 4 |
| M269T144   | 269. 1115162 | 143. 959 | 10323772. 78 |
| M269T310_1 | 269. 1117138 | 310. 075 | 33783750. 81 |
| M269T350   | 269. 1118159 | 349. 911 | 9259597. 073 |
| M269T427   | 269. 1127752 | 427. 362 | 5527298. 675 |
| M269T320_1 | 269. 1116382 | 319. 758 | 10890684. 62 |
| M269T357   | 269. 1237922 | 356. 74  | 74495022. 61 |
| M269T225   | 269. 123185  | 224. 729 | 4600388. 782 |
| M269T267   | 269. 1249077 | 267. 171 | 5490017. 288 |
| M269T299   | 269. 1227103 | 299. 493 | 3344021. 719 |
| M269T191   | 269. 1228021 | 190. 962 | 4451264. 262 |
| M269T310_2 | 269. 1235209 | 310. 075 | 8145919. 035 |
| M269T488   | 269. 1273774 | 488. 437 | 18793953. 44 |
| M269T93    | 269. 1295545 | 92. 7272 | 7378424. 382 |
| M269T320_2 | 269. 1232458 | 319. 758 | 38666360. 06 |
| M269T513_2 | 269. 1354837 | 513. 285 | 3854357. 529 |
| M269T586   | 269. 1358381 | 585. 968 | 3563365. 377 |
| M269T316_2 | 269. 1431079 | 315. 701 | 2304654. 988 |
| M269T453   | 269. 148336  | 453. 317 | 3819556. 167 |
| M269T106_2 | 269. 1483756 | 105. 503 | 17036304. 28 |
| M269T471   | 269. 1482853 | 470. 602 | 6627888. 064 |
| M269T176   | 269. 1483943 | 175. 952 | 8989931. 377 |
| M269T202   | 269. 1598356 | 202. 149 | 28462387. 21 |
| M269T367   | 269. 1568412 | 366. 514 | 529411433. 4 |
| M269T381   | 269. 1604129 | 380. 63  | 25816659. 46 |
| M269T477   | 269. 1745157 | 476. 554 | 6433371. 085 |
| M269T534   | 269. 1744918 | 533. 958 | 21294469. 42 |
| M269T670   | 269. 1734367 | 670. 166 | 19635684. 78 |
| M269T758   | 269. 1736367 | 758. 236 | 7338500. 579 |
| M269T703   | 269. 1736532 | 703. 35  | 10259640. 34 |
| M269T781   | 269. 2096883 | 781. 303 | 4597679. 905 |
| M269T809   | 269. 2243551 | 808. 678 | 18710757. 27 |
| M269T649   | 269. 2253748 | 649. 338 | 7124808. 006 |
| M269T702   | 269. 2253008 | 702. 055 | 10784964     |
| M269T562   | 269. 2249855 | 561. 955 | 32441425. 75 |
| M269T773   | 269. 2248841 | 773. 437 | 91371876. 33 |
| M269T31    | 269. 2450659 | 31. 4047 | 925384. 6517 |
| M269T309   | 269. 4867698 | 308. 967 | 6553320. 349 |
| M269T353   | 269. 4958768 | 352. 65  | 3328281. 472 |
| M270T75    | 269. 948003  | 74. 9588 | 10957222. 22 |
| M270T252   | 269. 9683491 | 251. 555 | 9359559. 972 |
| M270T282_1 | 269. 9895911 | 281. 666 | 734022. 7678 |
| M270T317_1 | 270. 059897  | 317. 199 | 3794726. 342 |
| M270T176   | 270. 0757819 | 175. 952 | 20538187. 51 |
| M270T737   | 270. 0833465 | 737. 198 | 2262202. 998 |
| M270T420   | 270. 0966928 | 420. 274 | 16550774. 19 |
| M270T334   | 270. 0962337 | 333. 715 | 43730410. 31 |
| M270T143   | 270. 096232  | 142. 85  | 42997440. 96 |
| M270T405   | 270. 0967062 | 404. 872 | 23928884. 69 |
| M270T592   | 270. 0956988 | 592. 067 | 6175202. 733 |
| M270T256   | 270. 0964071 | 255. 723 | 22762695. 34 |
| M270T438   | 270. 0967613 | 437. 571 | 13263977. 76 |

|            |             |         |             |
|------------|-------------|---------|-------------|
| M270T234   | 270.0949561 | 234.447 | 42464018.72 |
| M270T104   | 270.0961669 | 104.493 | 129454483.9 |
| M270T290   | 270.1070628 | 289.912 | 52425070.89 |
| M270T180   | 270.1073771 | 179.75  | 12907256.41 |
| M270T325_1 | 270.1078463 | 325.35  | 47576859.4  |
| M270T279   | 270.108431  | 279.039 | 12653962.94 |
| M270T91    | 270.1167219 | 90.7088 | 15981182.8  |
| M270T148   | 270.1164907 | 148.117 | 10504126.33 |
| M270T219   | 270.117426  | 219.233 | 7285990.197 |
| M270T314   | 270.1298036 | 314.259 | 23768990.72 |
| M270T325_2 | 270.1296523 | 325.35  | 14592336.35 |
| M270T488   | 270.1285045 | 488.437 | 5506542.768 |
| M270T357   | 270.1298048 | 356.74  | 10087049.6  |
| M270T159   | 270.1330222 | 159.017 | 40414652.06 |
| M270T241   | 270.1319647 | 241.368 | 21876458.53 |
| M270T106   | 270.1330872 | 105.503 | 16183113.22 |
| M270T282_2 | 270.1330996 | 281.666 | 1114033716  |
| M270T210_1 | 270.1330411 | 210.186 | 39623539.31 |
| M270T295   | 270.1320349 | 295.356 | 94942709.37 |
| M270T507   | 270.1325712 | 507.343 | 3220005.05  |
| M270T195   | 270.1330636 | 195.23  | 64351126.52 |
| M270T583   | 270.13245   | 583.068 | 2832589.793 |
| M270T346   | 270.1441693 | 345.848 | 22222768.14 |
| M270T367   | 270.1580947 | 366.514 | 46513278.87 |
| M270T199   | 270.1540819 | 199.43  | 20001435.75 |
| M270T210_2 | 270.1541759 | 210.186 | 3194544.659 |
| M270T150   | 270.1536241 | 149.65  | 4134904.077 |
| M270T188   | 270.1540275 | 188.126 | 4211735.272 |
| M270T304   | 270.1547631 | 303.513 | 16917132.36 |
| M270T317_2 | 270.1546015 | 317.199 | 5557224.15  |
| M270T327   | 270.1533288 | 326.78  | 15784056.17 |
| M270T522   | 270.1698797 | 522.177 | 3921814.616 |
| M270T385   | 270.169532  | 385.081 | 5718420.795 |
| M270T455   | 270.2007951 | 454.739 | 3412303.911 |
| M270T481   | 270.2053022 | 481.042 | 11750177.23 |
| M270T767   | 270.2289424 | 766.742 | 5207085.905 |
| M270T775   | 270.2288574 | 774.919 | 6235026.69  |
| M270T783   | 270.2289205 | 782.558 | 4380454.407 |
| M270T282_3 | 270.277505  | 281.666 | 734479.0435 |
| M270T834   | 270.2783822 | 834.486 | 42451097.42 |
| M270T32    | 270.3138779 | 32.4171 | 870124.3887 |
| M271T783   | 270.597924  | 782.558 | 2048024.438 |
| M271T420   | 270.6585426 | 420.274 | 5108433.046 |
| M271T117   | 270.9412504 | 116.689 | 8293394.112 |
| M271T176_1 | 270.999923  | 175.952 | 39997986.87 |
| M271T148   | 270.9932447 | 148.117 | 2438919.387 |
| M271T183   | 271.0549782 | 182.574 | 4190118.172 |
| M271T372_1 | 271.0784906 | 372.152 | 31717650.38 |
| M271T332_1 | 271.0803774 | 332.2   | 46672986.01 |
| M271T119   | 271.0802702 | 119.433 | 81493794.91 |
| M271T705   | 271.0803838 | 704.715 | 4803752.583 |
| M271T390   | 271.0803676 | 390.432 | 22316756.4  |
| M271T263   | 271.0803396 | 262.529 | 89260504.03 |
| M271T158   | 271.0803483 | 157.773 | 141332193.5 |

|            |              |          |              |
|------------|--------------|----------|--------------|
| M271T355   | 271. 080395  | 355. 41  | 39548748. 91 |
| M271T190   | 271. 0802568 | 189. 571 | 104615523. 8 |
| M271T293   | 271. 0803378 | 292. 623 | 238339495. 5 |
| M271T180   | 271. 0803355 | 179. 75  | 102419991. 3 |
| M271T106_1 | 271. 0802891 | 105. 503 | 519145637    |
| M271T199   | 271. 0803113 | 199. 43  | 67176241. 57 |
| M271T143   | 271. 0803258 | 142. 85  | 116987733. 3 |
| M271T651   | 271. 0816231 | 650. 898 | 48794228. 27 |
| M271T384_1 | 271. 0803256 | 383. 536 | 61141462. 99 |
| M271T210_1 | 271. 0803328 | 210. 186 | 61125831. 56 |
| M271T93    | 271. 080233  | 92. 7272 | 126992924. 4 |
| M271T341   | 271. 0802788 | 340. 548 | 40844486. 05 |
| M271T364   | 271. 0783431 | 363. 58  | 38384835. 23 |
| M271T521   | 271. 0803052 | 520. 739 | 2527479. 597 |
| M271T316   | 271. 0917067 | 315. 701 | 7069361. 424 |
| M271T266   | 271. 0914223 | 265. 624 | 9262596. 471 |
| M271T347   | 271. 0953528 | 347. 175 | 13170229. 41 |
| M271T405   | 271. 0993444 | 404. 872 | 1996499. 561 |
| M271T210_2 | 271. 0994278 | 210. 186 | 2181236. 916 |
| M271T104   | 271. 0998115 | 104. 493 | 6483204. 15  |
| M271T290   | 271. 1100743 | 289. 912 | 3416885. 257 |
| M271T475   | 271. 1068441 | 475. 007 | 3449747. 144 |
| M271T712   | 271. 1163014 | 711. 984 | 2251607. 266 |
| M271T144   | 271. 127552  | 143. 959 | 14232144. 16 |
| M271T98    | 271. 1273876 | 97. 7824 | 53506613. 43 |
| M271T106_2 | 271. 1275263 | 105. 503 | 28267091. 86 |
| M271T372_2 | 271. 1290458 | 372. 152 | 11306686. 81 |
| M271T351   | 271. 129044  | 351. 348 | 10771654. 76 |
| M271T332_2 | 271. 1290448 | 332. 2   | 25214418. 85 |
| M271T399   | 271. 1278266 | 399. 046 | 4831381. 849 |
| M271T282   | 271. 1337627 | 281. 666 | 139691410. 8 |
| M271T321   | 271. 1290292 | 321. 198 | 42050939. 23 |
| M271T325   | 271. 1401566 | 325. 35  | 827154660. 2 |
| M271T164   | 271. 1385769 | 163. 846 | 12036723. 54 |
| M271T310   | 271. 1402106 | 310. 075 | 19512666. 68 |
| M271T295   | 271. 1390224 | 295. 356 | 11556466. 67 |
| M271T176_2 | 271. 1386022 | 175. 952 | 6553078. 104 |
| M271T384_2 | 271. 1367191 | 383. 536 | 1859528. 016 |
| M271T446   | 271. 1429457 | 445. 984 | 2278989. 049 |
| M271T649_1 | 271. 1528063 | 649. 338 | 12350701. 48 |
| M271T534   | 271. 1563692 | 533. 958 | 1791301. 44  |
| M271T518   | 271. 1625147 | 517. 762 | 2804667. 924 |
| M271T202   | 271. 1639727 | 202. 149 | 3735360. 932 |
| M271T367   | 271. 1610376 | 366. 514 | 4021138. 969 |
| M271T305   | 271. 1582371 | 304. 777 | 785190. 3619 |
| M271T527   | 271. 1897779 | 526. 676 | 3650592. 591 |
| M271T780   | 271. 1877494 | 780. 043 | 9543111. 959 |
| M271T669   | 271. 2407298 | 668. 867 | 5765290. 29  |
| M271T649_2 | 271. 2406636 | 649. 338 | 45144836. 81 |
| M271T562   | 271. 2404999 | 561. 955 | 30195095. 46 |
| M271T719   | 271. 2408579 | 719. 215 | 5444571. 322 |
| M271T703   | 271. 240731  | 703. 35  | 35299557. 12 |
| M272T713   | 271. 5389438 | 713. 464 | 3317368. 018 |
| M272T458   | 271. 5805348 | 457. 576 | 5303818. 641 |

|            |              |          |              |
|------------|--------------|----------|--------------|
| M272T218   | 271. 9842659 | 217. 866 | 1277732. 809 |
| M272T252   | 272. 0068486 | 251. 555 | 11510491. 97 |
| M272T160   | 272. 0059608 | 160. 369 | 5067919. 89  |
| M272T169   | 272. 0060576 | 169. 221 | 8339553. 375 |
| M272T181   | 272. 0389117 | 181. 154 | 3340192. 414 |
| M272T119   | 272. 0645125 | 119. 433 | 144532265. 1 |
| M272T144   | 272. 0645626 | 143. 959 | 51592664. 94 |
| M272T135   | 272. 0645615 | 134. 574 | 80746771. 83 |
| M272T279_1 | 272. 0642953 | 279. 039 | 3441239. 379 |
| M272T456   | 272. 0701152 | 456. 126 | 8555640. 17  |
| M272T364   | 272. 0762084 | 363. 58  | 7950461. 021 |
| M272T158_1 | 272. 0837832 | 157. 773 | 14325053. 33 |
| M272T293   | 272. 0832225 | 292. 623 | 30818628. 31 |
| M272T180   | 272. 0831544 | 179. 75  | 10938260. 98 |
| M272T393   | 272. 0873804 | 392. 715 | 97388231. 24 |
| M272T143_1 | 272. 0836118 | 142. 85  | 15235165. 83 |
| M272T104   | 272. 0863451 | 104. 493 | 74251380. 56 |
| M272T378   | 272. 1003144 | 377. 704 | 6111500. 467 |
| M272T279_2 | 272. 1090669 | 279. 039 | 14856575. 11 |
| M272T188   | 272. 109346  | 188. 126 | 14289644. 24 |
| M272T158_2 | 272. 1110581 | 157. 773 | 37906161. 83 |
| M272T513   | 272. 1124595 | 513. 285 | 4168925. 331 |
| M272T106_1 | 272. 1123329 | 105. 503 | 179904149    |
| M272T143_2 | 272. 1109802 | 142. 85  | 42886891. 92 |
| M272T184   | 272. 1230351 | 183. 886 | 99850843. 91 |
| M272T226   | 272. 1230211 | 226. 202 | 98571918. 91 |
| M272T199   | 272. 1230097 | 199. 43  | 50501672. 62 |
| M272T171   | 272. 1230075 | 170. 665 | 82966378. 38 |
| M272T341   | 272. 1215026 | 340. 548 | 27610068. 05 |
| M272T395   | 272. 1261975 | 395. 264 | 72641228. 78 |
| M272T478   | 272. 1265839 | 477. 989 | 3598676. 873 |
| M272T321   | 272. 1290032 | 321. 198 | 5273473. 358 |
| M272T494   | 272. 1278478 | 494. 289 | 3747071. 433 |
| M272T164   | 272. 1339862 | 163. 846 | 5279953. 486 |
| M272T282   | 272. 1374519 | 281. 666 | 15303468. 16 |
| M272T201   | 272. 1341934 | 200. 766 | 4907913. 58  |
| M272T325   | 272. 1443714 | 325. 35  | 93486566. 42 |
| M272T106_2 | 272. 1480634 | 105. 503 | 5092248. 553 |
| M272T555   | 272. 1483666 | 555. 358 | 1203231. 283 |
| M272T301   | 272. 1485242 | 300. 782 | 5366181. 523 |
| M272T263   | 272. 1594537 | 262. 529 | 1807214. 192 |
| M272T358   | 272. 159241  | 357. 958 | 7545303. 618 |
| M272T385   | 272. 1709342 | 385. 081 | 2493985. 872 |
| M272T402   | 272. 1847105 | 401. 963 | 6016188. 74  |
| M272T484   | 272. 1846184 | 483. 973 | 4674917. 76  |
| M272T502   | 272. 2199001 | 501. 549 | 349851792. 5 |
| M272T649   | 272. 2440314 | 649. 338 | 7954521. 126 |
| M272T703   | 272. 2445022 | 703. 35  | 5696752. 012 |
| M272T795   | 272. 2934192 | 795. 165 | 170758655. 7 |
| M272T803   | 272. 2933619 | 802. 88  | 149663275. 9 |
| M272T773   | 272. 2944885 | 773. 437 | 7288940. 299 |
| M273T119   | 272. 5651842 | 119. 433 | 25630476. 65 |
| M273T144_1 | 272. 5670334 | 143. 959 | 9323048. 155 |
| M273T135   | 272. 5653146 | 134. 574 | 15988475. 02 |

|            |              |          |              |
|------------|--------------|----------|--------------|
| M273T456   | 272. 5729933 | 456. 126 | 2754502. 682 |
| M273T324   | 272. 6757617 | 323. 984 | 7966629. 208 |
| M273T72    | 272. 9400988 | 71. 5935 | 9503020. 828 |
| M273T310   | 273. 0537562 | 310. 075 | 10235313. 45 |
| M273T124   | 273. 0540531 | 124. 487 | 2006895. 677 |
| M273T144_2 | 273. 0593588 | 143. 959 | 5919890. 955 |
| M273T663   | 273. 0584435 | 663. 287 | 12219302. 11 |
| M273T197   | 273. 0598752 | 196. 644 | 9886348. 298 |
| M273T156   | 273. 0594455 | 156. 393 | 6406359. 548 |
| M273T284   | 273. 0593747 | 284. 377 | 14217053. 78 |
| M273T211   | 273. 0586913 | 211. 288 | 15116726. 13 |
| M273T254   | 273. 0595719 | 254. 446 | 17172970. 14 |
| M273T686   | 273. 0748721 | 686. 47  | 11967215. 27 |
| M273T496   | 273. 0730315 | 495. 779 | 12625436. 22 |
| M273T427   | 273. 0747526 | 427. 362 | 27243539. 98 |
| M273T504   | 273. 0731752 | 504. 466 | 17574284. 13 |
| M273T293   | 273. 0851218 | 292. 623 | 1754422. 732 |
| M273T393   | 273. 091789  | 392. 715 | 9253606. 949 |
| M273T351   | 273. 0963622 | 351. 348 | 7601151. 308 |
| M273T558   | 273. 0947236 | 557. 967 | 23806104. 44 |
| M273T318   | 273. 0963675 | 318. 497 | 8268423. 527 |
| M273T357   | 273. 1071322 | 356. 74  | 3365058. 386 |
| M273T144_3 | 273. 1065112 | 143. 959 | 8181432. 36  |
| M273T306   | 273. 1070893 | 306. 247 | 7617048. 173 |
| M273T106_1 | 273. 1068075 | 105. 503 | 13134847     |
| M273T93    | 273. 1065475 | 92. 7272 | 31503238. 35 |
| M273T408   | 273. 12197   | 407. 724 | 4371072. 721 |
| M273T145   | 273. 1172988 | 145. 382 | 21449472. 41 |
| M273T110   | 273. 1177228 | 110. 047 | 46624754. 58 |
| M273T90    | 273. 1171239 | 89. 6999 | 67471253. 74 |
| M273T445   | 273. 1222103 | 444. 725 | 12164990. 28 |
| M273T184   | 273. 1262624 | 183. 886 | 7746390. 299 |
| M273T223   | 273. 1243001 | 223. 474 | 19394229. 78 |
| M273T469   | 273. 1229842 | 469. 252 | 6571229. 446 |
| M273T395   | 273. 1299495 | 395. 264 | 11305392. 41 |
| M273T171   | 273. 1268781 | 170. 665 | 4957550. 413 |
| M273T98    | 273. 1435157 | 97. 7824 | 21141030. 81 |
| M273T416   | 273. 1439399 | 416. 239 | 1479040. 218 |
| M273T106_2 | 273. 1434187 | 105. 503 | 10169304. 94 |
| M273T91    | 273. 1434195 | 90. 7088 | 16803364. 56 |
| M273T260   | 273. 1431859 | 259. 74  | 11961031. 8  |
| M273T321   | 273. 1433965 | 321. 198 | 59648781. 11 |
| M273T191   | 273. 143421  | 190. 962 | 9357553. 562 |
| M273T272   | 273. 1541001 | 272. 304 | 148511395. 5 |
| M273T325   | 273. 1541086 | 325. 35  | 184896617. 8 |
| M273T106_3 | 273. 155052  | 105. 503 | 19898619. 45 |
| M273T291   | 273. 1540918 | 291. 307 | 50963568. 33 |
| M273T94    | 273. 1546073 | 93. 7378 | 20786226. 1  |
| M273T279   | 273. 1662958 | 279. 039 | 6916964. 627 |
| M273T552   | 273. 160436  | 552. 452 | 4014120. 232 |
| M273T455   | 273. 1903894 | 454. 739 | 20210290. 91 |
| M273T669   | 273. 2198722 | 668. 867 | 6064710. 603 |
| M273T562   | 273. 2199431 | 561. 955 | 36871439. 69 |
| M273T500   | 273. 2247476 | 500. 045 | 66795844. 31 |

|            |              |          |              |
|------------|--------------|----------|--------------|
| M273T649   | 273. 2564611 | 649. 338 | 5048586. 775 |
| M273T751   | 273. 2520592 | 751. 333 | 43023834. 01 |
| M273T795   | 273. 2964661 | 795. 165 | 28270542. 35 |
| M273T787   | 273. 2981683 | 786. 569 | 8928322. 249 |
| M273T803   | 273. 296454  | 802. 88  | 25619624. 12 |
| M274T169   | 273. 9419773 | 169. 221 | 5322027. 674 |
| M274T190   | 274. 0855132 | 189. 571 | 596842750. 1 |
| M274T240   | 274. 0871896 | 239. 913 | 44796512. 19 |
| M274T206_1 | 274. 0909643 | 205. 903 | 251133140    |
| M274T147   | 274. 0909284 | 146. 742 | 689808125. 5 |
| M274T126_1 | 274. 0909274 | 125. 598 | 184152831    |
| M274T106_1 | 274. 0910025 | 105. 503 | 80168156     |
| M274T465   | 274. 0915379 | 464. 668 | 860130. 406  |
| M274T171   | 274. 0909661 | 170. 665 | 6910410910   |
| M274T295   | 274. 0909738 | 295. 356 | 94614797. 53 |
| M274T313   | 274. 0949749 | 312. 85  | 26946771. 62 |
| M274T261   | 274. 0909524 | 261. 177 | 240649013. 4 |
| M274T327   | 274. 0949348 | 326. 78  | 11708564. 66 |
| M274T121   | 274. 1022526 | 120. 525 | 2781082. 075 |
| M274T111   | 274. 1022303 | 111. 382 | 11734306. 54 |
| M274T375   | 274. 1045427 | 375. 021 | 5620378. 888 |
| M274T102   | 274. 1016473 | 102. 247 | 27481513. 41 |
| M274T638   | 274. 1059489 | 637. 996 | 6628465. 321 |
| M274T145   | 274. 1022504 | 145. 382 | 17922749. 82 |
| M274T503   | 274. 1138439 | 503. 046 | 18833341. 73 |
| M274T443   | 274. 1173545 | 443. 256 | 4919592. 569 |
| M274T91    | 274. 1215427 | 90. 7088 | 4518732. 589 |
| M274T127   | 274. 1278277 | 126. 785 | 5659828. 871 |
| M274T122   | 274. 1277022 | 122. 007 | 8051789. 154 |
| M274T133   | 274. 1278112 | 133. 259 | 5228031. 047 |
| M274T161   | 274. 1292837 | 161. 494 | 8974785. 239 |
| M274T432   | 274. 1293002 | 431. 64  | 4090828. 166 |
| M274T230   | 274. 1373123 | 230. 321 | 31374394. 35 |
| M274T328   | 274. 1411004 | 328. 106 | 12859620. 6  |
| M274T183   | 274. 1372295 | 182. 574 | 36943664. 02 |
| M274T348   | 274. 1372523 | 348. 488 | 2883090. 043 |
| M274T106_2 | 274. 1376892 | 105. 503 | 756302154. 7 |
| M274T260   | 274. 1410862 | 259. 74  | 16870283. 29 |
| M274T250   | 274. 1376985 | 250. 144 | 14915602. 73 |
| M274T143   | 274. 1416849 | 142. 85  | 648090962. 1 |
| M274T195   | 274. 1413041 | 195. 23  | 36266916. 8  |
| M274T305   | 274. 1377352 | 304. 777 | 57760266. 16 |
| M274T272   | 274. 1575217 | 272. 304 | 16294565. 2  |
| M274T325   | 274. 1561441 | 325. 35  | 15571759. 75 |
| M274T206_2 | 274. 1650534 | 205. 903 | 11089494. 5  |
| M274T126_2 | 274. 16354   | 125. 598 | 18672471. 29 |
| M274T306   | 274. 164659  | 306. 247 | 1429633. 884 |
| M274T487   | 274. 1640073 | 486. 885 | 3553008. 588 |
| M274T527   | 274. 1637993 | 526. 676 | 5727843. 779 |
| M274T188   | 274. 1630219 | 188. 126 | 12967558. 67 |
| M274T176   | 274. 1636784 | 175. 952 | 8885392. 031 |
| M274T107   | 274. 1635813 | 106. 513 | 12158492. 44 |
| M274T392   | 274. 1995542 | 391. 678 | 10666905. 95 |
| M274T398   | 274. 1996099 | 397. 878 | 15881978. 67 |



|            |              |          |              |
|------------|--------------|----------|--------------|
| M274T475   | 274. 2012492 | 475. 007 | 4019980. 513 |
| M274T685   | 274. 1990514 | 684. 985 | 10048556. 1  |
| M274T743   | 274. 2723141 | 742. 68  | 76147154. 52 |
| M275T309   | 274. 5658543 | 308. 967 | 24971612. 36 |
| M275T504   | 274. 613058  | 504. 466 | 6383635. 598 |
| M275T147   | 274. 9713383 | 146. 742 | 2169417. 753 |
| M275T126_1 | 274. 9839763 | 125. 598 | 902857. 9657 |
| M275T211   | 275. 0061125 | 211. 288 | 30384045. 65 |
| M275T308   | 275. 0691268 | 307. 735 | 2017907. 291 |
| M275T297   | 275. 069213  | 296. 739 | 5607621. 705 |
| M275T316_1 | 275. 0693058 | 315. 701 | 1887017. 766 |
| M275T219   | 275. 0723749 | 219. 233 | 8401099. 21  |
| M275T229   | 275. 0748912 | 229. 059 | 6085656. 128 |
| M275T331   | 275. 0746645 | 330. 809 | 7643020. 886 |
| M275T148   | 275. 0736172 | 148. 117 | 5475567. 349 |
| M275T102   | 275. 0866199 | 102. 247 | 20565769. 91 |
| M275T126_2 | 275. 0946508 | 125. 598 | 19488227. 59 |
| M275T233   | 275. 0878546 | 233. 081 | 6090094. 824 |
| M275T169   | 275. 0948344 | 169. 221 | 844068724. 8 |
| M275T261   | 275. 0942121 | 261. 177 | 28350649. 72 |
| M275T477   | 275. 1006843 | 476. 554 | 14682719. 22 |
| M275T295   | 275. 0956064 | 295. 356 | 9462726. 959 |
| M275T443   | 275. 1017933 | 443. 256 | 6617342. 482 |
| M275T159   | 275. 1225125 | 159. 017 | 72574401. 24 |
| M275T167   | 275. 1225626 | 166. 613 | 26188231. 02 |
| M275T106_1 | 275. 122726  | 105. 503 | 65916101. 45 |
| M275T143   | 275. 1224989 | 142. 85  | 63106098. 5  |
| M275T95    | 275. 122441  | 94. 7467 | 13364142. 85 |
| M275T316_2 | 275. 1218822 | 315. 701 | 8985959. 663 |
| M275T163   | 275. 1332291 | 162. 728 | 212134885. 6 |
| M275T124   | 275. 1331002 | 124. 487 | 180032342. 3 |
| M275T158   | 275. 143563  | 157. 773 | 11675183. 64 |
| M275T142   | 275. 1435372 | 141. 825 | 39238088. 43 |
| M275T106_2 | 275. 1432391 | 105. 503 | 80982063. 42 |
| M275T121   | 275. 1435168 | 120. 525 | 33983394. 31 |
| M275T465   | 275. 1489634 | 464. 668 | 4999531. 757 |
| M275T314   | 275. 1577156 | 314. 259 | 25856940. 49 |
| M275T765   | 275. 1615439 | 765. 406 | 5052417. 864 |
| M275T777   | 275. 1617712 | 777. 245 | 7460958. 024 |
| M275T338   | 275. 1597037 | 337. 767 | 21048092. 23 |
| M275T802_1 | 275. 1624337 | 801. 685 | 9438428. 105 |
| M275T744   | 275. 1613485 | 744. 182 | 59019125. 28 |
| M275T691   | 275. 1599163 | 691. 022 | 4581988. 731 |
| M275T78    | 275. 1695575 | 78. 3841 | 14542697. 02 |
| M275T399   | 275. 1650956 | 399. 046 | 4120664. 345 |
| M275T642   | 275. 163664  | 642. 211 | 2840266. 21  |
| M275T827   | 275. 1635905 | 827. 271 | 21669121. 96 |
| M275T787   | 275. 1630263 | 786. 569 | 20739383. 97 |
| M275T789   | 275. 1993091 | 789. 293 | 72496391. 79 |
| M275T818   | 275. 1980717 | 818. 418 | 14367352. 81 |
| M275T832   | 275. 1993706 | 831. 709 | 20767073. 63 |
| M275T802_2 | 275. 1992915 | 801. 685 | 41049796. 62 |
| M275T680   | 275. 2002013 | 680. 402 | 13289889. 17 |
| M275T438   | 275. 2128898 | 437. 571 | 5836928. 972 |

|            |              |          |              |
|------------|--------------|----------|--------------|
| M275T649   | 275. 235758  | 649. 338 | 1941708. 921 |
| M275T703   | 275. 2360367 | 703. 35  | 1620123. 49  |
| M276T497   | 275. 5656314 | 497. 214 | 1950959. 278 |
| M276T82    | 275. 8754809 | 82. 0569 | 12935444. 42 |
| M276T37    | 275. 8874318 | 37. 1891 | 1460074. 465 |
| M276T35    | 275. 9722761 | 34. 5397 | 3621607. 415 |
| M276T211   | 276. 0092649 | 211. 288 | 2721548. 262 |
| M276T408   | 276. 0612416 | 407. 724 | 904318. 3018 |
| M276T184   | 276. 0701074 | 183. 886 | 3598020. 157 |
| M276T286   | 276. 0701676 | 285. 9   | 4765375. 117 |
| M276T625   | 276. 06463   | 624. 608 | 881197. 7254 |
| M276T372   | 276. 0876804 | 372. 152 | 4076762. 524 |
| M276T466   | 276. 0855396 | 466. 162 | 1668014. 635 |
| M276T171   | 276. 0968677 | 170. 665 | 100987846. 3 |
| M276T261   | 276. 0951209 | 261. 177 | 3037378. 601 |
| M276T102   | 276. 1062685 | 102. 247 | 37337008. 06 |
| M276T143_1 | 276. 1049851 | 142. 85  | 14529257. 86 |
| M276T385   | 276. 1070737 | 385. 081 | 3240932. 422 |
| M276T98    | 276. 1170731 | 97. 7824 | 230044399    |
| M276T418   | 276. 1217992 | 417. 676 | 9870848. 822 |
| M276T572   | 276. 1216914 | 571. 523 | 2034077. 529 |
| M276T121   | 276. 1166514 | 120. 525 | 12538192. 9  |
| M276T362   | 276. 1225434 | 362. 146 | 4493028. 543 |
| M276T107   | 276. 1165987 | 106. 513 | 28227581. 03 |
| M276T159_1 | 276. 1254819 | 159. 017 | 7746397. 796 |
| M276T436   | 276. 1337651 | 436. 069 | 4559652. 659 |
| M276T320   | 276. 13321   | 319. 758 | 23508723. 33 |
| M276T406   | 276. 133091  | 406. 289 | 4566088. 139 |
| M276T163   | 276. 1422155 | 162. 728 | 24822011. 97 |
| M276T293_1 | 276. 1429724 | 292. 623 | 190324904. 5 |
| M276T103   | 276. 1423805 | 103. 423 | 209379295. 3 |
| M276T389   | 276. 1424154 | 389. 035 | 2458577. 681 |
| M276T143_2 | 276. 1422118 | 142. 85  | 29904677. 3  |
| M276T257   | 276. 1429189 | 257. 155 | 161672730    |
| M276T279   | 276. 142942  | 279. 039 | 110355879. 9 |
| M276T376   | 276. 1423302 | 376. 409 | 9725513. 205 |
| M276T494   | 276. 1424376 | 494. 289 | 27553872. 12 |
| M276T284   | 276. 1456769 | 284. 377 | 105151349. 2 |
| M276T438   | 276. 1442693 | 437. 571 | 3132269. 528 |
| M276T311   | 276. 154935  | 311. 445 | 6823101. 15  |
| M276T268   | 276. 1541643 | 268. 427 | 8138393. 73  |
| M276T159_2 | 276. 1545259 | 159. 017 | 7174048. 986 |
| M276T275   | 276. 1545068 | 274. 968 | 5199584. 776 |
| M276T293_2 | 276. 1547181 | 292. 623 | 6945237. 205 |
| M276T237   | 276. 15437   | 237. 171 | 5708567. 423 |
| M276T474   | 276. 1802452 | 473. 597 | 5209566. 382 |
| M277T82_1  | 276. 8689524 | 82. 0569 | 77348875. 35 |
| M277T38    | 276. 8952406 | 38. 3208 | 7437301. 719 |
| M277T65    | 276. 8952438 | 64. 6213 | 3924633. 783 |
| M277T777_1 | 277. 025175  | 777. 245 | 2750612. 127 |
| M277T211   | 277. 0395155 | 211. 288 | 967251. 9005 |
| M277T183   | 277. 0840648 | 182. 574 | 2316365. 25  |
| M277T308   | 277. 0908682 | 307. 735 | 4265384. 715 |
| M277T293_1 | 277. 0904143 | 292. 623 | 5450608. 643 |

|            |             |         |             |
|------------|-------------|---------|-------------|
| M277T350   | 277.0909106 | 349.911 | 10573004.01 |
| M277T104_1 | 277.0908108 | 104.493 | 13056068.93 |
| M277T144   | 277.1002372 | 143.959 | 7310614.096 |
| M277T171   | 277.0990937 | 170.665 | 7795940.499 |
| M277T89    | 277.1006774 | 88.6838 | 402537367.4 |
| M277T131   | 277.1003289 | 130.668 | 14779272.53 |
| M277T798   | 277.1123624 | 797.773 | 17296060.05 |
| M277T104_2 | 277.1017218 | 104.493 | 72625742.8  |
| M277T500   | 277.1171017 | 500.045 | 22203527.41 |
| M277T243   | 277.1171147 | 242.682 | 3712431.664 |
| M277T446   | 277.1147804 | 445.984 | 10403638.34 |
| M277T425   | 277.1171891 | 424.572 | 5503920.907 |
| M277T199   | 277.1384466 | 199.43  | 9319033.219 |
| M277T95    | 277.1374495 | 94.7467 | 40250158.63 |
| M277T320   | 277.1366072 | 319.758 | 4420080.57  |
| M277T90    | 277.1496793 | 89.6999 | 45027883.89 |
| M277T293_2 | 277.147407  | 292.623 | 31499670.47 |
| M277T279   | 277.1473747 | 279.039 | 15070558.24 |
| M277T104_3 | 277.1488465 | 104.493 | 22853780.3  |
| M277T494   | 277.146725  | 494.289 | 2935791.438 |
| M277T254   | 277.1474244 | 254.446 | 22725840.27 |
| M277T475   | 277.1536992 | 475.007 | 8045593.509 |
| M277T427   | 277.1640994 | 427.362 | 12805335.14 |
| M277T396   | 277.1675676 | 396.415 | 9601670.082 |
| M277T836   | 277.178914  | 836.034 | 41902109.73 |
| M277T680   | 277.176559  | 680.402 | 7926017.845 |
| M277T656   | 277.1781273 | 655.9   | 7066535.591 |
| M277T555   | 277.1791644 | 555.358 | 3951353.988 |
| M277T818   | 277.1790927 | 818.418 | 29206277.88 |
| M277T777_2 | 277.1788989 | 777.245 | 3747755074  |
| M277T740   | 277.1778644 | 740.014 | 6982253.87  |
| M277T466   | 277.1786001 | 466.162 | 3524382.883 |
| M277T359   | 277.176287  | 359.32  | 5658719.494 |
| M277T761   | 277.1779101 | 760.916 | 15267460.83 |
| M277T82_2  | 277.186119  | 82.0569 | 6215073.535 |
| M277T791   | 277.2140315 | 790.802 | 36055564.55 |
| M277T705   | 277.2150218 | 704.715 | 39413381.53 |
| M277T838   | 277.2160775 | 837.524 | 80750882.13 |
| M277T814   | 277.2160791 | 814.095 | 90670540.41 |
| M277T32    | 277.2149618 | 32.4171 | 1498592.793 |
| M278T403   | 277.8345659 | 403.447 | 6281000.93  |
| M278T36    | 277.9634214 | 35.8675 | 2576934.121 |
| M278T121   | 277.9709493 | 120.525 | 18058588.14 |
| M278T239   | 278.0458626 | 238.605 | 4370160.36  |
| M278T127   | 278.0645783 | 126.785 | 5008318.64  |
| M278T101   | 278.0854706 | 101.161 | 34677754.08 |
| M278T308   | 278.0864648 | 307.735 | 13091243.73 |
| M278T260   | 278.0860309 | 259.74  | 13349288.02 |
| M278T814   | 278.0830115 | 814.095 | 5590777.114 |
| M278T91    | 278.0853846 | 90.7088 | 223529948.1 |
| M278T341   | 278.0889216 | 340.548 | 11967666.17 |
| M278T334   | 278.1023104 | 333.715 | 22588482.04 |
| M278T347   | 278.1020209 | 347.175 | 48892132.75 |
| M278T461   | 278.1014516 | 460.537 | 4874029.28  |

|            |              |          |              |
|------------|--------------|----------|--------------|
| M278T512   | 278. 1015223 | 511. 77  | 4565791. 877 |
| M278T413   | 278. 1119673 | 413. 295 | 4569781. 69  |
| M278T309   | 278. 1216962 | 308. 967 | 6519287. 879 |
| M278T142   | 278. 123384  | 141. 825 | 71202594. 35 |
| M278T116   | 278. 1233452 | 115. 522 | 896141751. 4 |
| M278T104   | 278. 1233189 | 104. 493 | 3957493830   |
| M278T474   | 278. 1385139 | 473. 597 | 4349674. 257 |
| M278T401   | 278. 1374384 | 400. 59  | 16499857. 01 |
| M278T336   | 278. 1373914 | 336. 344 | 6571152. 729 |
| M278T361   | 278. 1377677 | 360. 794 | 7381443. 418 |
| M278T490   | 278. 1376733 | 489. 826 | 2229610. 426 |
| M278T525   | 278. 1381597 | 525. 132 | 8694100. 959 |
| M278T497   | 278. 1492879 | 497. 214 | 4364253. 766 |
| M278T294   | 278. 1481621 | 293. 896 | 3825902. 176 |
| M278T485   | 278. 1493769 | 485. 471 | 2519254. 14  |
| M278T378   | 278. 1484104 | 377. 704 | 4505926. 353 |
| M278T331   | 278. 1492872 | 330. 809 | 6252811. 483 |
| M278T416   | 278. 1588564 | 416. 239 | 7430234. 482 |
| M278T350   | 278. 1599932 | 349. 911 | 9898692. 262 |
| M278T257   | 278. 1699581 | 257. 155 | 5252054. 421 |
| M278T651   | 278. 1757274 | 650. 898 | 5243294. 434 |
| M278T730   | 278. 1751158 | 729. 798 | 12316688. 64 |
| M278T836   | 278. 1783624 | 836. 034 | 5192932. 809 |
| M278T777   | 278. 1821671 | 777. 245 | 669656311. 7 |
| M278T811   | 278. 2069942 | 811. 413 | 12606989. 58 |
| M278T705   | 278. 2178799 | 704. 715 | 7088023. 76  |
| M278T816   | 278. 2188745 | 815. 517 | 19978586. 01 |
| M278T838   | 278. 218748  | 837. 524 | 14960276. 69 |
| M278T824   | 278. 2470356 | 824. 311 | 5417856. 195 |
| M278T833   | 278. 2470578 | 833. 029 | 3175512. 022 |
| M278T318   | 278. 4906414 | 318. 497 | 1608067. 845 |
| M279T176   | 278. 5665426 | 175. 952 | 26711880. 3  |
| M279T743   | 278. 5952459 | 742. 68  | 21424985. 03 |
| M279T302   | 278. 6388444 | 302. 191 | 11456968. 08 |
| M279T295_1 | 278. 638745  | 295. 356 | 8047857. 076 |
| M279T250   | 278. 63825   | 250. 144 | 9141734. 286 |
| M279T374_1 | 278. 8297906 | 373. 532 | 20833766. 85 |
| M279T82    | 278. 8681118 | 82. 0569 | 5693724. 731 |
| M279T372   | 278. 9151946 | 372. 152 | 1337066. 68  |
| M279T210   | 279. 0279402 | 210. 186 | 1875315. 169 |
| M279T91_1  | 279. 0458092 | 90. 7088 | 40954631. 47 |
| M279T423   | 279. 0471102 | 423. 199 | 46488231. 4  |
| M279T135   | 279. 0693491 | 134. 574 | 47968315. 93 |
| M279T143   | 279. 0698671 | 142. 85  | 43775039. 31 |
| M279T168   | 279. 069824  | 167. 804 | 39656115. 04 |
| M279T188   | 279. 0698513 | 188. 126 | 11562295. 67 |
| M279T118   | 279. 0693182 | 118. 116 | 126318014. 5 |
| M279T104_1 | 279. 0693222 | 104. 493 | 202400678. 2 |
| M279T211   | 279. 0699382 | 211. 288 | 10685916. 36 |
| M279T295_2 | 279. 0718682 | 295. 356 | 23703921. 03 |
| M279T744   | 279. 0743141 | 744. 182 | 6477117. 968 |
| M279T371_1 | 279. 080966  | 370. 777 | 186779804    |
| M279T525   | 279. 0792552 | 525. 132 | 2124590. 538 |
| M279T91_2  | 279. 0886678 | 90. 7088 | 22038975. 59 |

|            |              |          |              |
|------------|--------------|----------|--------------|
| M279T339   | 279. 0991849 | 339. 085 | 24264507. 39 |
| M279T309   | 279. 106534  | 308. 967 | 6070981. 208 |
| M279T582   | 279. 1063144 | 581. 625 | 11949239. 96 |
| M279T528   | 279. 1065904 | 528. 185 | 15992635. 55 |
| M279T595   | 279. 1062767 | 595. 066 | 26960074. 82 |
| M279T500   | 279. 111911  | 500. 045 | 7313041. 889 |
| M279T555   | 279. 108439  | 555. 358 | 6754905. 059 |
| M279T94    | 279. 118459  | 93. 7378 | 9478402. 827 |
| M279T142   | 279. 1258274 | 141. 825 | 6512700. 63  |
| M279T116   | 279. 1256494 | 115. 522 | 97149775. 35 |
| M279T104_2 | 279. 1256415 | 104. 493 | 491589401    |
| M279T328   | 279. 1327046 | 328. 106 | 13806339. 3  |
| M279T538   | 279. 1328384 | 538. 316 | 4883209. 085 |
| M279T642   | 279. 1329832 | 642. 211 | 4833171. 683 |
| M279T362   | 279. 1328278 | 362. 146 | 26897801. 35 |
| M279T342   | 279. 1326301 | 341. 802 | 20376562. 41 |
| M279T291   | 279. 1386256 | 291. 307 | 9926393. 376 |
| M279T371_2 | 279. 1381704 | 370. 777 | 9070528. 741 |
| M279T527   | 279. 1406928 | 526. 676 | 1221247. 617 |
| M279T385   | 279. 1436278 | 385. 081 | 6202365. 707 |
| M279T794   | 279. 1599803 | 793. 649 | 30426633. 05 |
| M279T809   | 279. 160144  | 808. 678 | 52391884. 25 |
| M279T701   | 279. 1600404 | 700. 758 | 28532029. 96 |
| M279T750   | 279. 1599796 | 749. 96  | 274918843. 8 |
| M279T800_1 | 279. 1600428 | 800. 484 | 28137560. 98 |
| M279T694   | 279. 1600559 | 693. 81  | 29835585. 26 |
| M279T838_1 | 279. 1600054 | 837. 524 | 21750848. 29 |
| M279T823_1 | 279. 160008  | 822. 881 | 45881577. 61 |
| M279T685   | 279. 1601906 | 684. 985 | 54417572. 4  |
| M279T674   | 279. 160231  | 674. 402 | 38478900. 84 |
| M279T481   | 279. 1699966 | 481. 042 | 32983850. 99 |
| M279T374_2 | 279. 1691934 | 373. 532 | 6097457. 006 |
| M279T494   | 279. 1700066 | 494. 289 | 50437363. 27 |
| M279T393   | 279. 1893488 | 392. 715 | 62961592. 68 |
| M279T686   | 279. 1913484 | 686. 47  | 10401543. 9  |
| M279T810   | 279. 193928  | 810. 052 | 12138395. 09 |
| M279T764   | 279. 1943498 | 763. 856 | 115300361. 1 |
| M279T626   | 279. 19415   | 626. 042 | 5552439. 033 |
| M279T777   | 279. 190767  | 777. 245 | 22781171. 77 |
| M279T753   | 279. 1926419 | 752. 541 | 65727145. 26 |
| M279T652   | 279. 1963079 | 651. 956 | 6963899. 009 |
| M279T800_2 | 279. 1954393 | 800. 484 | 15309818. 52 |
| M279T823_2 | 279. 1953179 | 822. 881 | 20715679. 68 |
| M279T813   | 279. 2301679 | 812. 862 | 97945611. 61 |
| M279T838_2 | 279. 2280243 | 837. 524 | 21634314. 42 |
| M279T800_3 | 279. 2301559 | 800. 484 | 19897974. 84 |
| M280T62_1  | 279. 9225023 | 62. 1777 | 21589905. 18 |
| M280T472   | 280. 0295296 | 472. 132 | 2807768. 789 |
| M280T119   | 280. 0500914 | 119. 433 | 46531192. 01 |
| M280T144   | 280. 0502178 | 143. 959 | 10283060. 5  |
| M280T135   | 280. 0501081 | 134. 574 | 22097731. 02 |
| M280T425_1 | 280. 0496257 | 424. 572 | 4039345. 468 |
| M280T140   | 280. 0735214 | 140. 286 | 6807451. 757 |
| M280T106   | 280. 0729471 | 105. 503 | 23239154. 88 |

|            |             |         |             |
|------------|-------------|---------|-------------|
| M280T118   | 280.0735354 | 118.116 | 12066380.54 |
| M280T443   | 280.0785255 | 443.256 | 2961609.757 |
| M280T371   | 280.0833416 | 370.777 | 16057735.88 |
| M280T163   | 280.1018713 | 162.728 | 6999912.979 |
| M280T100   | 280.1028662 | 100.146 | 56402213.23 |
| M280T299   | 280.1024748 | 299.493 | 9894032.631 |
| M280T527   | 280.111316  | 526.676 | 2180137.429 |
| M280T595   | 280.1096367 | 595.066 | 3387898.087 |
| M280T314   | 280.1169497 | 314.259 | 10459853.07 |
| M280T613   | 280.116754  | 612.699 | 15265763.33 |
| M280T507   | 280.1179114 | 507.343 | 6046506.521 |
| M280T425_2 | 280.1167324 | 424.572 | 16279971.26 |
| M280T549   | 280.1157258 | 549.375 | 9622018.61  |
| M280T234   | 280.116871  | 234.447 | 3800505.273 |
| M280T104   | 280.1261867 | 104.493 | 60073999.47 |
| M280T309   | 280.1284432 | 308.967 | 10465959.1  |
| M280T293   | 280.138572  | 292.623 | 2658461.198 |
| M280T128   | 280.1373666 | 127.944 | 907218164.2 |
| M280T143   | 280.1373775 | 142.85  | 1905651623  |
| M280T95    | 280.1393021 | 94.7467 | 84557886    |
| M280T342   | 280.1366805 | 341.802 | 2791290.731 |
| M280T113   | 280.1374379 | 112.781 | 952919176.1 |
| M280T662   | 280.1549821 | 661.979 | 1730928.869 |
| M280T557   | 280.1547626 | 556.816 | 2372497.671 |
| M280T639   | 280.1549231 | 639.219 | 2548774.148 |
| M280T451   | 280.15465   | 450.503 | 4746828.812 |
| M280T698   | 280.15451   | 697.952 | 1980645.85  |
| M280T712   | 280.1565455 | 711.984 | 8566337.848 |
| M280T69    | 280.1607003 | 69.2834 | 5270868.919 |
| M280T62_2  | 280.1607146 | 62.1777 | 6824938.721 |
| M280T41    | 280.1606158 | 40.6031 | 14396212.65 |
| M280T504   | 280.1651314 | 504.466 | 18621239.03 |
| M280T54    | 280.1629133 | 53.6731 | 6694300.034 |
| M280T411   | 280.1757336 | 410.542 | 2222207.191 |
| M280T420   | 280.1758267 | 420.274 | 1557074.589 |
| M280T365   | 280.1752669 | 365.061 | 2607311.266 |
| M280T794   | 280.1895464 | 793.649 | 4642448.51  |
| M280T574   | 280.1897996 | 574.363 | 8110067.863 |
| M280T604   | 280.1895827 | 603.95  | 3562247.395 |
| M280T765   | 280.1945989 | 765.406 | 14357655.15 |
| M280T394   | 280.1935904 | 393.934 | 8032913.674 |
| M280T653   | 280.1888984 | 653.147 | 5551439.875 |
| M280T813   | 280.2339892 | 812.862 | 18099383.34 |
| M280T776   | 280.2608708 | 776.194 | 25974007.97 |
| M281T119   | 280.5519646 | 119.433 | 9330432.281 |
| M281T75    | 280.9922499 | 74.9588 | 75370146.82 |
| M281T321   | 281.0197797 | 321.198 | 16536387.28 |
| M281T117   | 281.0506556 | 116.689 | 4936405.476 |
| M281T147   | 281.06141   | 146.742 | 4329120.68  |
| M281T216   | 281.0613203 | 216.359 | 18071409.94 |
| M281T92    | 281.0670234 | 91.7174 | 8674892.554 |
| M281T371   | 281.0762655 | 370.777 | 15337063.17 |
| M281T494   | 281.0901735 | 494.289 | 2467906.633 |
| M281T378   | 281.1004014 | 377.704 | 5248814.122 |

|            |              |          |              |
|------------|--------------|----------|--------------|
| M281T527   | 281. 1014965 | 526. 676 | 1711712. 791 |
| M281T353   | 281. 107587  | 352. 65  | 5327729. 391 |
| M281T409   | 281. 1121059 | 409. 271 | 19344922. 07 |
| M281T338   | 281. 1121037 | 337. 767 | 42118115. 79 |
| M281T364_1 | 281. 1121292 | 363. 58  | 5567341. 237 |
| M281T386   | 281. 1120835 | 386. 352 | 91747845. 23 |
| M281T203   | 281. 1227638 | 203. 36  | 2321501. 156 |
| M281T355   | 281. 1251009 | 355. 41  | 13895819. 61 |
| M281T425   | 281. 1204956 | 424. 572 | 1493115. 174 |
| M281T104   | 281. 1294618 | 104. 493 | 3836522. 319 |
| M281T114   | 281. 1455189 | 114. 15  | 154826837. 5 |
| M281T143   | 281. 141653  | 142. 85  | 225091694. 3 |
| M281T451   | 281. 1492844 | 450. 503 | 4491089. 78  |
| M281T419   | 281. 1488732 | 418. 97  | 6251027. 796 |
| M281T364_2 | 281. 1478937 | 363. 58  | 32001109. 02 |
| M281T502   | 281. 1485081 | 501. 549 | 11999478. 93 |
| M281T384   | 281. 1582012 | 383. 536 | 7427568. 247 |
| M281T369   | 281. 1650111 | 369. 321 | 7650027. 488 |
| M281T504   | 281. 1676265 | 504. 466 | 887710. 5306 |
| M281T562   | 281. 2255952 | 561. 955 | 26703610. 88 |
| M281T59    | 281. 2457633 | 58. 6151 | 29585833. 95 |
| M281T764   | 281. 2463759 | 763. 856 | 17304243. 01 |
| M281T830   | 281. 2463187 | 830. 193 | 11634056. 16 |
| M281T772   | 281. 2463614 | 772. 206 | 19286617. 46 |
| M281T820   | 281. 2938639 | 819. 78  | 3086048. 137 |
| M282T389_1 | 281. 5759443 | 389. 035 | 1624930. 074 |
| M282T78    | 281. 6386876 | 78. 3841 | 20409624. 76 |
| M282T369   | 281. 6677607 | 369. 321 | 1689139. 084 |
| M282T75    | 281. 9427095 | 74. 9588 | 17927709. 14 |
| M282T211   | 282. 0437385 | 211. 288 | 8018948. 427 |
| M282T161   | 282. 0647688 | 161. 494 | 1654034. 054 |
| M282T522_1 | 282. 0935081 | 522. 177 | 2920171. 097 |
| M282T482   | 282. 0933124 | 482. 436 | 4674153. 14  |
| M282T507   | 282. 0969247 | 507. 343 | 15243787. 42 |
| M282T203   | 282. 1075951 | 203. 36  | 2613902. 214 |
| M282T321_1 | 282. 1060407 | 321. 198 | 7347858. 203 |
| M282T519   | 282. 109819  | 519. 257 | 12851489. 66 |
| M282T328   | 282. 1178047 | 328. 106 | 49641508. 88 |
| M282T144_1 | 282. 1166848 | 143. 959 | 9448319. 505 |
| M282T103   | 282. 1159855 | 103. 423 | 133882748. 5 |
| M282T169   | 282. 1175323 | 169. 221 | 9194832. 612 |
| M282T336_1 | 282. 1176071 | 336. 344 | 28915015. 98 |
| M282T93    | 282. 1160352 | 92. 7272 | 1569331871   |
| M282T522_2 | 282. 1328343 | 522. 177 | 4500562. 888 |
| M282T283   | 282. 1318784 | 282. 886 | 4600160. 574 |
| M282T481   | 282. 131934  | 481. 042 | 7926616. 258 |
| M282T343   | 282. 1319726 | 343. 226 | 5064405. 355 |
| M282T389_2 | 282. 1320136 | 389. 035 | 4011061. 632 |
| M282T253   | 282. 1323923 | 253. 024 | 3210804. 31  |
| M282T466   | 282. 1322207 | 466. 162 | 5177026. 791 |
| M282T608   | 282. 1329705 | 608. 261 | 1795303. 583 |
| M282T144_2 | 282. 1426891 | 143. 959 | 31822339. 21 |
| M282T336_2 | 282. 144716  | 336. 344 | 5149551. 137 |
| M282T113   | 282. 1424787 | 112. 781 | 14669886. 21 |

|            |              |          |              |
|------------|--------------|----------|--------------|
| M282T305   | 282. 1435934 | 304. 777 | 4858186. 303 |
| M282T586   | 282. 1469907 | 585. 968 | 7948777. 172 |
| M282T364   | 282. 1481959 | 363. 58  | 4682596. 24  |
| M282T135   | 282. 1531121 | 134. 574 | 29545836. 01 |
| M282T334   | 282. 1561123 | 333. 715 | 7443033. 183 |
| M282T151   | 282. 153122  | 151. 016 | 73807909. 74 |
| M282T321_2 | 282. 1537267 | 321. 198 | 8061256. 416 |
| M282T638   | 282. 2054045 | 637. 996 | 140359139. 5 |
| M282T649   | 282. 2053582 | 649. 338 | 143919868. 7 |
| M282T660   | 282. 2053514 | 660. 455 | 41499711. 64 |
| M282T713   | 282. 2053607 | 713. 464 | 19651528. 31 |
| M282T795   | 282. 2779158 | 795. 165 | 454011833. 9 |
| M282T834   | 282. 2779032 | 834. 486 | 43414041. 38 |
| M282T751   | 282. 2779238 | 751. 333 | 6301537. 067 |
| M282T762   | 282. 277993  | 762. 439 | 4631419. 523 |
| M282T826   | 282. 2778909 | 825. 74  | 117202220. 7 |
| M283T357_1 | 282. 832459  | 356. 74  | 6385736. 141 |
| M283T36    | 282. 9087141 | 35. 8675 | 9451495. 302 |
| M283T65    | 282. 9087222 | 64. 6213 | 2220060. 234 |
| M283T254   | 282. 955539  | 254. 446 | 982068. 2796 |
| M283T75    | 283. 0253671 | 74. 9588 | 9943197. 602 |
| M283T160   | 283. 0436031 | 160. 369 | 7870938. 443 |
| M283T439   | 283. 0808845 | 439. 021 | 10564866. 53 |
| M283T461   | 283. 0808389 | 460. 537 | 2367878. 193 |
| M283T463   | 283. 106777  | 463. 271 | 21990658. 1  |
| M283T694   | 283. 1067569 | 693. 81  | 4711028. 155 |
| M283T519   | 283. 1156336 | 519. 257 | 3340948. 558 |
| M283T328   | 283. 1259331 | 328. 106 | 8327774. 846 |
| M283T286   | 283. 1276807 | 285. 9   | 4240503. 035 |
| M283T94    | 283. 12031   | 93. 7378 | 180240605    |
| M283T412   | 283. 1282331 | 411. 838 | 45494000. 17 |
| M283T468   | 283. 1282395 | 467. 706 | 9570815. 276 |
| M283T211   | 283. 1277164 | 211. 288 | 10514699. 85 |
| M283T311   | 283. 1385069 | 311. 445 | 21152724. 89 |
| M283T345   | 283. 13759   | 344. 555 | 173744449. 9 |
| M283T249   | 283. 140153  | 248. 895 | 18930400. 14 |
| M283T357_2 | 283. 1385178 | 356. 74  | 28850729. 84 |
| M283T304   | 283. 1407143 | 303. 513 | 11610946. 85 |
| M283T384   | 283. 1380376 | 383. 536 | 6602875. 925 |
| M283T368   | 283. 1425732 | 367. 949 | 9837627. 428 |
| M283T327   | 283. 1376292 | 326. 78  | 1310091819   |
| M283T411_1 | 283. 1395334 | 410. 542 | 63441447. 53 |
| M283T150   | 283. 1569873 | 149. 65  | 6138625. 8   |
| M283T442   | 283. 1645175 | 442. 005 | 3061878. 919 |
| M283T351   | 283. 1734854 | 351. 348 | 3370677. 897 |
| M283T411_2 | 283. 1745297 | 410. 542 | 5497551. 606 |
| M283T336   | 283. 1745993 | 336. 344 | 3777247. 267 |
| M283T374   | 283. 1745422 | 373. 532 | 4208478. 931 |
| M283T649_1 | 283. 2083833 | 649. 338 | 21589676. 41 |
| M283T703   | 283. 2400809 | 703. 35  | 10273698. 4  |
| M283T669   | 283. 2410817 | 668. 867 | 9602936. 951 |
| M283T649_2 | 283. 241637  | 649. 338 | 13555456. 31 |
| M283T562   | 283. 2402491 | 561. 955 | 36258077. 57 |
| M283T795   | 283. 2813427 | 795. 165 | 87773961. 08 |



|            |              |          |              |
|------------|--------------|----------|--------------|
| M283T827   | 283. 2813289 | 827. 271 | 22950194. 98 |
| M284T183   | 283. 571437  | 182. 574 | 7663265. 625 |
| M284T435   | 283. 649734  | 434. 589 | 3971435. 739 |
| M284T379   | 283. 6514979 | 379. 194 | 4920054. 967 |
| M284T574   | 284. 0563598 | 574. 363 | 6011602. 955 |
| M284T127   | 284. 0598766 | 126. 785 | 3984149. 471 |
| M284T713   | 284. 0672093 | 713. 464 | 3398363. 586 |
| M284T144   | 284. 075481  | 143. 959 | 5597404. 28  |
| M284T207_1 | 284. 0755504 | 207. 393 | 27211927. 97 |
| M284T399   | 284. 0750006 | 399. 046 | 3664156. 103 |
| M284T317   | 284. 0942205 | 317. 199 | 7498293. 825 |
| M284T708   | 284. 0964725 | 707. 557 | 2139050. 353 |
| M284T201   | 284. 0964364 | 200. 766 | 49350604. 36 |
| M284T216   | 284. 0964605 | 216. 359 | 51785356. 5  |
| M284T301_1 | 284. 0970991 | 300. 782 | 1284314485   |
| M284T119   | 284. 1118172 | 119. 433 | 5361121. 715 |
| M284T126   | 284. 1118258 | 125. 598 | 3478695. 913 |
| M284T106   | 284. 111352  | 105. 503 | 7804465. 024 |
| M284T135   | 284. 1119098 | 134. 574 | 8048486. 768 |
| M284T169   | 284. 1124663 | 169. 221 | 7805586. 922 |
| M284T150   | 284. 1108308 | 149. 65  | 12932767     |
| M284T463   | 284. 1104738 | 463. 271 | 7812060. 54  |
| M284T368   | 284. 1119517 | 367. 949 | 19683040. 6  |
| M284T597   | 284. 1114277 | 596. 628 | 9878205. 025 |
| M284T343   | 284. 122709  | 343. 226 | 15044132. 38 |
| M284T350   | 284. 1226184 | 349. 911 | 13944809. 92 |
| M284T323   | 284. 1226    | 322. 536 | 60067512. 16 |
| M284T93    | 284. 1225475 | 92. 7272 | 21260599. 06 |
| M284T245   | 284. 1216615 | 245. 199 | 33591790. 03 |
| M284T228   | 284. 1217208 | 227. 633 | 48471482. 15 |
| M284T212   | 284. 1217132 | 212. 448 | 28694373. 15 |
| M284T301_2 | 284. 1261014 | 300. 782 | 122390031. 5 |
| M284T243   | 284. 1340763 | 242. 682 | 1126710. 721 |
| M284T345   | 284. 1448314 | 344. 555 | 38469386. 05 |
| M284T389   | 284. 1473226 | 389. 035 | 30699788. 68 |
| M284T299   | 284. 147584  | 299. 493 | 1112875004   |
| M284T327   | 284. 1410689 | 326. 78  | 172569048. 9 |
| M284T207_2 | 284. 1590846 | 207. 393 | 6618082. 449 |
| M284T320   | 284. 1598464 | 319. 758 | 7145662. 114 |
| M284T237   | 284. 1593439 | 237. 171 | 4929352. 497 |
| M284T190   | 284. 1708791 | 189. 571 | 14334485. 19 |
| M284T419   | 284. 1850054 | 418. 97  | 3828520. 534 |
| M284T584   | 284. 1838825 | 584. 417 | 96161172. 29 |
| M284T427   | 284. 1849501 | 427. 362 | 4820768. 784 |
| M284T442   | 284. 1842285 | 442. 005 | 13052367. 08 |
| M284T386   | 284. 2055056 | 386. 352 | 9579653. 614 |
| M284T563   | 284. 2442435 | 563. 297 | 4909857. 955 |
| M284T784   | 284. 2924075 | 783. 78  | 7830371. 651 |
| M284T773   | 284. 2928927 | 773. 437 | 11955244. 31 |
| M285T440   | 284. 519083  | 440. 459 | 1092115. 876 |
| M285T372   | 284. 9201149 | 372. 152 | 4090258. 139 |
| M285T320   | 284. 992118  | 319. 758 | 18059216. 21 |
| M285T325   | 285. 0595639 | 325. 35  | 17295490. 08 |
| M285T207   | 285. 0788991 | 207. 393 | 3180741. 827 |

|            |              |          |              |
|------------|--------------|----------|--------------|
| M285T215   | 285. 0994378 | 215. 068 | 2456643. 234 |
| M285T364_1 | 285. 0950231 | 363. 58  | 4326203. 879 |
| M285T355   | 285. 1068903 | 355. 41  | 4579824. 05  |
| M285T301   | 285. 1018994 | 300. 782 | 131720719. 7 |
| M285T347   | 285. 1067001 | 347. 175 | 2892392. 263 |
| M285T293   | 285. 1079628 | 292. 623 | 10214553. 84 |
| M285T150   | 285. 1144491 | 149. 65  | 1232691. 843 |
| M285T364_2 | 285. 106897  | 363. 58  | 13482568. 36 |
| M285T600   | 285. 1167995 | 599. 621 | 2178807. 803 |
| M285T458   | 285. 1221787 | 457. 576 | 3854853. 214 |
| M285T544   | 285. 1255728 | 544. 056 | 6027682. 313 |
| M285T323   | 285. 1265034 | 322. 536 | 8838433. 77  |
| M285T304   | 285. 1252443 | 303. 513 | 10608444. 71 |
| M285T228   | 285. 1268373 | 227. 633 | 5914713. 072 |
| M285T378   | 285. 1336987 | 377. 704 | 6175176. 428 |
| M285T401   | 285. 1433232 | 400. 59  | 9015012. 607 |
| M285T104   | 285. 1438912 | 104. 493 | 71698358. 86 |
| M285T327   | 285. 1434391 | 326. 78  | 16966670. 25 |
| M285T314   | 285. 1451963 | 314. 259 | 6591328. 476 |
| M285T343   | 285. 1452915 | 343. 226 | 8428888. 378 |
| M285T299   | 285. 1529662 | 299. 493 | 161353928. 1 |
| M285T364_3 | 285. 1553196 | 363. 58  | 25623626. 06 |
| M285T311   | 285. 1573425 | 311. 445 | 29214596. 22 |
| M285T190   | 285. 1727808 | 189. 571 | 925638. 0516 |
| M285T584   | 285. 191084  | 584. 417 | 8782426. 755 |
| M285T563   | 285. 2204264 | 563. 297 | 11237109. 11 |
| M285T649   | 285. 2568716 | 649. 338 | 31611834. 65 |
| M285T703   | 285. 2558032 | 703. 35  | 25629320. 32 |
| M285T385   | 285. 4880281 | 385. 081 | 1067593. 228 |
| M286T167   | 285. 9837919 | 166. 613 | 1641569. 728 |
| M286T252   | 286. 0126478 | 251. 555 | 1385900. 902 |
| M286T329   | 286. 0227337 | 329. 481 | 1428577. 504 |
| M286T314   | 286. 054808  | 314. 259 | 3274673. 498 |
| M286T233   | 286. 0674396 | 233. 081 | 4514229. 724 |
| M286T293   | 286. 0909409 | 292. 623 | 14659912. 88 |
| M286T99    | 286. 0914867 | 98. 9918 | 544962026. 1 |
| M286T143   | 286. 0909965 | 142. 85  | 12734884. 86 |
| M286T357   | 286. 0909616 | 356. 74  | 7421469. 135 |
| M286T320   | 286. 0913862 | 319. 758 | 12621149. 36 |
| M286T341   | 286. 0910069 | 340. 548 | 7026076. 43  |
| M286T199   | 286. 1014462 | 199. 43  | 8529171. 526 |
| M286T191   | 286. 1019658 | 190. 962 | 11187305. 77 |
| M286T301   | 286. 1022804 | 300. 782 | 21006768. 67 |
| M286T119_1 | 286. 1125695 | 119. 433 | 2578187. 212 |
| M286T455   | 286. 1066744 | 454. 739 | 3141728. 375 |
| M286T386   | 286. 1052222 | 386. 352 | 8270048. 46  |
| M286T119_2 | 286. 1272517 | 119. 433 | 14977962. 99 |
| M286T140   | 286. 1267115 | 140. 286 | 7791976. 273 |
| M286T181   | 286. 1266412 | 181. 154 | 17041498. 89 |
| M286T150   | 286. 1266197 | 149. 65  | 13666285. 98 |
| M286T104   | 286. 1271723 | 104. 493 | 32063340. 99 |
| M286T459   | 286. 128345  | 458. 985 | 5630046. 305 |
| M286T229   | 286. 1385809 | 229. 059 | 16869659. 04 |
| M286T291   | 286. 1369803 | 291. 307 | 38646841. 88 |

|            |              |          |              |
|------------|--------------|----------|--------------|
| M286T323   | 286. 1391031 | 322. 536 | 20419828. 63 |
| M286T299_1 | 286. 1371078 | 299. 493 | 17942358. 41 |
| M286T342   | 286. 1363255 | 341. 802 | 15671196. 02 |
| M286T443   | 286. 1420067 | 443. 256 | 32759521. 6  |
| M286T108   | 286. 1483673 | 107. 537 | 38746362. 65 |
| M286T299_2 | 286. 1534493 | 299. 493 | 17696695. 08 |
| M286T362   | 286. 1598331 | 362. 146 | 2074997. 362 |
| M286T364   | 286. 1742188 | 363. 58  | 76472376. 26 |
| M286T402   | 286. 181277  | 401. 963 | 20811511. 91 |
| M286T420   | 286. 1998799 | 420. 274 | 73093454. 79 |
| M286T232   | 286. 200518  | 231. 773 | 1464397. 221 |
| M286T703   | 286. 2000032 | 703. 35  | 4054389. 499 |
| M286T642   | 286. 1993701 | 642. 211 | 2713312. 255 |
| M286T764   | 286. 2729514 | 763. 856 | 18499279. 39 |
| M286T772   | 286. 2721537 | 772. 206 | 48105936. 92 |
| M286T820   | 286. 3082504 | 819. 78  | 8240201. 876 |
| M287T697   | 286. 5923335 | 696. 575 | 4120670. 495 |
| M287T389   | 286. 6418919 | 389. 035 | 9233094. 056 |
| M287T402   | 286. 6814443 | 401. 963 | 4209246. 672 |
| M287T252_1 | 286. 970443  | 251. 555 | 5461766. 433 |
| M287T169   | 286. 9712042 | 169. 221 | 4381591. 474 |
| M287T499   | 287. 0530949 | 498. 645 | 9417384. 376 |
| M287T633   | 287. 0531282 | 633. 476 | 2347508. 131 |
| M287T379   | 287. 0680318 | 379. 194 | 8617238. 523 |
| M287T308   | 287. 0744569 | 307. 735 | 11826628. 51 |
| M287T293   | 287. 0750532 | 292. 623 | 5233755. 631 |
| M287T103_1 | 287. 0757366 | 103. 423 | 7683353. 508 |
| M287T143_1 | 287. 0748818 | 142. 85  | 7004345. 335 |
| M287T321   | 287. 0744831 | 321. 198 | 9764090. 787 |
| M287T413   | 287. 1223129 | 413. 295 | 1726118. 427 |
| M287T102   | 287. 1228984 | 102. 247 | 77290156. 24 |
| M287T143_2 | 287. 1229592 | 142. 85  | 13183344. 93 |
| M287T302   | 287. 1213522 | 302. 191 | 174039264. 6 |
| M287T201   | 287. 1211727 | 200. 766 | 27458075. 54 |
| M287T188   | 287. 1212842 | 188. 126 | 56673339. 19 |
| M287T216   | 287. 1223991 | 216. 359 | 9367884. 348 |
| M287T175   | 287. 1224072 | 174. 865 | 12537764. 95 |
| M287T261   | 287. 1218087 | 261. 177 | 48294738. 24 |
| M287T317_1 | 287. 1223473 | 317. 199 | 25356744. 54 |
| M287T347   | 287. 1223733 | 347. 175 | 33461682. 01 |
| M287T147   | 287. 1333391 | 146. 742 | 34046268. 83 |
| M287T274   | 287. 1337823 | 273. 531 | 35174806. 91 |
| M287T180   | 287. 1360054 | 179. 75  | 55168175. 54 |
| M287T31    | 287. 1334285 | 31. 4047 | 2125191. 058 |
| M287T252_2 | 287. 1337981 | 251. 555 | 139681102    |
| M287T199   | 287. 1332687 | 199. 43  | 121080367. 2 |
| M287T103_2 | 287. 134884  | 103. 423 | 18722690. 57 |
| M287T135   | 287. 13332   | 134. 574 | 22762420. 01 |
| M287T452   | 287. 1401271 | 451. 804 | 46630677. 14 |
| M287T168   | 287. 1332792 | 167. 804 | 105954182. 4 |
| M287T215   | 287. 133419  | 215. 068 | 16163861. 52 |
| M287T284   | 287. 1338972 | 284. 377 | 9116521. 084 |
| M287T230   | 287. 1418718 | 230. 321 | 989488. 8899 |
| M287T323   | 287. 1408503 | 322. 536 | 2561542. 357 |

|            |              |          |              |
|------------|--------------|----------|--------------|
| M287T784   | 287. 1465086 | 783. 78  | 22203464. 94 |
| M287T97    | 287. 1592649 | 96. 7698 | 6631189. 25  |
| M287T418   | 287. 1571104 | 417. 676 | 5447345. 683 |
| M287T345   | 287. 170416  | 344. 555 | 4205922. 985 |
| M287T317_2 | 287. 1727006 | 317. 199 | 3282874. 446 |
| M287T163   | 287. 1826485 | 162. 728 | 50236628. 66 |
| M287T198   | 287. 1811347 | 198. 072 | 126707599. 2 |
| M287T364   | 287. 1782645 | 363. 58  | 10115862. 33 |
| M287T420   | 287. 2018097 | 420. 274 | 9912688. 533 |
| M287T515   | 287. 205402  | 514. 727 | 5407841. 858 |
| M287T54    | 287. 2205263 | 53. 6731 | 527817. 4195 |
| M287T813   | 287. 2359703 | 812. 862 | 29498342. 84 |
| M287T799   | 287. 2359107 | 799. 089 | 27271989. 39 |
| M287T562   | 287. 2354795 | 561. 955 | 10546273. 6  |
| M287T792   | 287. 2358795 | 792. 146 | 29593572. 65 |
| M288T205   | 287. 562356  | 204. 747 | 1342172. 811 |
| M288T31_1  | 287. 631014  | 31. 4047 | 12286897. 21 |
| M288T418_1 | 287. 6534587 | 417. 676 | 2493312. 558 |
| M288T161   | 287. 9790253 | 161. 494 | 29371336. 46 |
| M288T168_1 | 287. 9790091 | 167. 804 | 48473046. 9  |
| M288T163   | 288. 0700066 | 162. 728 | 2068243. 733 |
| M288T418_2 | 288. 0855319 | 417. 676 | 3064656. 956 |
| M288T206   | 288. 1044002 | 205. 903 | 12437884. 53 |
| M288T375_1 | 288. 1043303 | 375. 021 | 34689106. 61 |
| M288T436   | 288. 106533  | 436. 069 | 13383053. 28 |
| M288T165   | 288. 1065143 | 165. 217 | 51926415. 72 |
| M288T221   | 288. 1042957 | 220. 676 | 17558474. 94 |
| M288T143_1 | 288. 1064244 | 142. 85  | 66401994. 66 |
| M288T427_1 | 288. 1075813 | 427. 362 | 38980952. 78 |
| M288T177   | 288. 1043184 | 177. 295 | 26449884. 6  |
| M288T155   | 288. 1041892 | 155. 197 | 47210936. 81 |
| M288T124   | 288. 1044618 | 124. 487 | 56360676. 55 |
| M288T104   | 288. 106446  | 104. 493 | 324646047. 8 |
| M288T324_1 | 288. 1064893 | 323. 984 | 88096626. 61 |
| M288T294   | 288. 1081356 | 293. 896 | 33154054. 75 |
| M288T375_2 | 288. 1215324 | 375. 021 | 12062202. 99 |
| M288T388   | 288. 1215519 | 387. 763 | 193379283. 9 |
| M288T160   | 288. 1181147 | 160. 369 | 3959685. 52  |
| M288T143_2 | 288. 1181291 | 142. 85  | 5409085. 536 |
| M288T212   | 288. 1179997 | 212. 448 | 14060640. 15 |
| M288T107   | 288. 1186388 | 106. 513 | 5586985. 878 |
| M288T263   | 288. 1238998 | 262. 529 | 2107966. 787 |
| M288T190   | 288. 1247661 | 189. 571 | 6275400. 09  |
| M288T398   | 288. 1238414 | 397. 878 | 17777388. 55 |
| M288T302_1 | 288. 1250921 | 302. 191 | 19777929. 3  |
| M288T427_2 | 288. 1227919 | 427. 362 | 9643814. 016 |
| M288T201   | 288. 1247268 | 200. 766 | 2413505. 943 |
| M288T317   | 288. 1250544 | 317. 199 | 1908857. 258 |
| M288T272   | 288. 1372401 | 272. 304 | 1930492. 257 |
| M288T31_2  | 288. 1328961 | 31. 4047 | 3555259. 07  |
| M288T252   | 288. 1370081 | 251. 555 | 13379910. 71 |
| M288T350   | 288. 1330104 | 349. 911 | 629620. 8615 |
| M288T106   | 288. 1430737 | 105. 503 | 63303224. 59 |
| M288T199_1 | 288. 1392184 | 199. 43  | 13031839. 7  |

|            |              |          |              |
|------------|--------------|----------|--------------|
| M288T452   | 288. 1425573 | 451. 804 | 12678555. 33 |
| M288T143_3 | 288. 1431827 | 142. 85  | 14200542. 11 |
| M288T168_2 | 288. 1397511 | 167. 804 | 15125474. 28 |
| M288T151   | 288. 1429986 | 151. 016 | 12414108     |
| M288T311   | 288. 1518077 | 311. 445 | 22446037. 67 |
| M288T293   | 288. 1517395 | 292. 623 | 9739204. 735 |
| M288T334   | 288. 1517856 | 333. 715 | 16979947. 93 |
| M288T275   | 288. 1517759 | 274. 968 | 3028226. 348 |
| M288T784   | 288. 151733  | 783. 78  | 2730318. 455 |
| M288T324_2 | 288. 151681  | 323. 984 | 14480683. 63 |
| M288T203   | 288. 1530977 | 203. 36  | 34332038. 17 |
| M288T241   | 288. 1527479 | 241. 368 | 69932225. 95 |
| M288T302_2 | 288. 153008  | 302. 191 | 8291329. 445 |
| M288T346   | 288. 1600606 | 345. 848 | 5108483. 461 |
| M288T192   | 288. 1540204 | 192. 437 | 9302232. 77  |
| M288T211   | 288. 153209  | 211. 288 | 35808920. 26 |
| M288T197   | 288. 1651227 | 196. 644 | 13643334. 5  |
| M288T158   | 288. 1656391 | 157. 773 | 8046560. 369 |
| M288T365   | 288. 1618093 | 365. 061 | 12274937. 06 |
| M288T379   | 288. 1648703 | 379. 194 | 18325121. 24 |
| M288T513   | 288. 1796112 | 513. 285 | 4068930. 419 |
| M288T607   | 288. 1795954 | 606. 774 | 2263210. 764 |
| M288T392   | 288. 189972  | 391. 678 | 9723271. 255 |
| M288T199_2 | 288. 1842624 | 199. 43  | 12088898. 17 |
| M288T446   | 288. 1911754 | 445. 984 | 19097250. 96 |
| M288T427_3 | 288. 191117  | 427. 362 | 4786185. 669 |
| M288T111   | 288. 201516  | 111. 382 | 4419273. 652 |
| M288T276   | 288. 2015814 | 276. 414 | 29859154. 49 |
| M288T81    | 288. 2131663 | 80. 824  | 12281053. 41 |
| M288T613   | 288. 2156096 | 612. 699 | 3762180. 62  |
| M288T449   | 288. 2143092 | 448. 978 | 21650362. 28 |
| M288T411   | 288. 2202596 | 410. 542 | 6054762. 904 |
| M288T794   | 288. 2387272 | 793. 649 | 5653408. 715 |
| M288T785   | 288. 238751  | 785. 136 | 3949185. 785 |
| M288T800   | 288. 2398354 | 800. 484 | 8561976. 492 |
| M288T813   | 288. 238941  | 812. 862 | 5920943. 018 |
| M288T764   | 288. 2886751 | 763. 856 | 3659469412   |
| M288T760   | 288. 2886546 | 759. 605 | 4479786295   |
| M288T791   | 288. 2906102 | 790. 802 | 28410883. 73 |
| M288T816   | 288. 28844   | 815. 517 | 38074101. 06 |
| M289T485   | 288. 5604059 | 485. 471 | 1070921. 365 |
| M289T32    | 288. 6317846 | 32. 4171 | 3107757. 737 |
| M289T746   | 288. 6395006 | 745. 603 | 9829185. 107 |
| M289T765   | 288. 6394824 | 765. 406 | 4143135. 14  |
| M289T731   | 288. 6394348 | 731. 347 | 17775458. 25 |
| M289T756   | 288. 6394644 | 755. 537 | 8574131. 064 |
| M289T773   | 288. 6394401 | 773. 437 | 1830549. 053 |
| M289T534   | 288. 6486963 | 533. 958 | 2174709. 673 |
| M289T37    | 288. 9170525 | 37. 1891 | 6998222. 541 |
| M289T63    | 288. 9175599 | 63. 4448 | 4912992. 408 |
| M289T49    | 288. 9175856 | 48. 7362 | 3602673. 992 |
| M289T123   | 288. 9536006 | 123. 262 | 5244373. 978 |
| M289T113   | 288. 9535879 | 112. 781 | 3084669. 601 |
| M289T75    | 288. 9566098 | 74. 9588 | 26369271. 14 |

|            |             |         |             |
|------------|-------------|---------|-------------|
| M289T241   | 289.0220579 | 241.368 | 709340.174  |
| M289T218   | 289.0508187 | 217.866 | 20021320.81 |
| M289T201   | 289.052446  | 200.766 | 17022303.28 |
| M289T119   | 289.0898623 | 119.433 | 169736242.8 |
| M289T158   | 289.0899037 | 157.773 | 283365146.6 |
| M289T314   | 289.0899448 | 314.259 | 126846240.4 |
| M289T293   | 289.0899433 | 292.623 | 508597571.6 |
| M289T649   | 289.0890465 | 649.338 | 36642861.69 |
| M289T106   | 289.0898451 | 105.503 | 1031031097  |
| M289T233   | 289.0898809 | 233.081 | 181514545.4 |
| M289T143_1 | 289.0899107 | 142.85  | 234583673.1 |
| M289T210   | 289.089892  | 210.186 | 115948034.7 |
| M289T374   | 289.0899077 | 373.532 | 14057948.5  |
| M289T93    | 289.0898311 | 92.7272 | 274912215.4 |
| M289T261   | 289.0875626 | 261.177 | 160839677.2 |
| M289T390   | 289.0949465 | 390.432 | 9001429.11  |
| M289T345   | 289.0951241 | 344.555 | 30896139.66 |
| M289T181   | 289.095207  | 181.154 | 323843917.9 |
| M289T719   | 289.0905375 | 719.215 | 3678170.981 |
| M289T703   | 289.0903509 | 703.35  | 6316087.538 |
| M289T131   | 289.0952473 | 130.668 | 45686818.47 |
| M289T521   | 289.0911068 | 520.739 | 3603978.247 |
| M289T143_2 | 289.1023929 | 142.85  | 8193853.402 |
| M289T304   | 289.1005576 | 303.513 | 3466272.859 |
| M289T222   | 289.1025872 | 222.017 | 3621068.867 |
| M289T436   | 289.110291  | 436.069 | 1431959.993 |
| M289T427   | 289.1096235 | 427.362 | 4226729.667 |
| M289T104_1 | 289.1096864 | 104.493 | 30676539.08 |
| M289T324   | 289.1103549 | 323.984 | 5744693.032 |
| M289T469   | 289.1172583 | 469.252 | 20755040.56 |
| M289T388   | 289.1259828 | 387.763 | 32440921.29 |
| M289T206   | 289.1387225 | 205.903 | 106892029.4 |
| M289T163   | 289.1387068 | 162.728 | 16039723.32 |
| M289T230   | 289.1370858 | 230.321 | 696935910.6 |
| M289T258   | 289.1359957 | 258.489 | 40277816.63 |
| M289T175   | 289.1384447 | 174.865 | 11663148.43 |
| M289T104_2 | 289.1383537 | 104.493 | 29616761.5  |
| M289T237   | 289.1485895 | 237.171 | 356736166.9 |
| M289T87    | 289.1481389 | 86.6643 | 62234745.75 |
| M289T301   | 289.1483409 | 300.782 | 574159652.8 |
| M289T317   | 289.1482598 | 317.199 | 76344928.36 |
| M289T260   | 289.1486751 | 259.74  | 476907256.1 |
| M289T376   | 289.1531041 | 376.409 | 9871443.171 |
| M289T367   | 289.163132  | 366.514 | 924208.4596 |
| M289T500   | 289.1627048 | 500.045 | 6362564.518 |
| M289T398   | 289.1739595 | 397.878 | 2481662.998 |
| M289T834   | 289.1791372 | 834.486 | 2988326.077 |
| M289T817   | 289.1784009 | 816.953 | 8007864.454 |
| M289T276   | 289.2004753 | 276.414 | 1203510.449 |
| M289T697   | 289.2460368 | 696.575 | 12857708.64 |
| M289T648   | 289.2512755 | 648.026 | 2325991.93  |
| M289T764   | 289.2917005 | 763.856 | 680390481.7 |
| M289T748   | 289.2916008 | 748.486 | 261614902.8 |
| M289T757   | 289.2916788 | 757.001 | 633578151.3 |

|            |              |          |              |
|------------|--------------|----------|--------------|
| M290T32    | 289. 6336664 | 32. 4171 | 629936. 8909 |
| M290T351_1 | 290. 0419721 | 351. 348 | 1720242. 924 |
| M290T777   | 290. 0456021 | 777. 245 | 4134882. 222 |
| M290T177   | 290. 0548026 | 177. 295 | 16577583. 98 |
| M290T510   | 290. 0642648 | 510. 333 | 5018507. 491 |
| M290T443   | 290. 0606417 | 443. 256 | 3809652. 223 |
| M290T725   | 290. 0854037 | 725. 212 | 2848105. 428 |
| M290T706_1 | 290. 0850169 | 706. 229 | 26222551. 95 |
| M290T642   | 290. 0860357 | 642. 211 | 6081777. 285 |
| M290T359_1 | 290. 0856243 | 359. 32  | 9032329. 834 |
| M290T715   | 290. 0852301 | 715. 011 | 10503736. 46 |
| M290T659   | 290. 0865232 | 658. 953 | 76717416. 97 |
| M290T677   | 290. 0861962 | 677. 376 | 9011591. 252 |
| M290T119   | 290. 0924229 | 119. 433 | 23109347. 66 |
| M290T190_1 | 290. 0935002 | 189. 571 | 123998025. 4 |
| M290T574   | 290. 0886226 | 574. 363 | 3378108. 002 |
| M290T106_1 | 290. 092858  | 105. 503 | 130618706    |
| M290T291   | 290. 0935614 | 291. 307 | 71896630. 47 |
| M290T93    | 290. 093605  | 92. 7272 | 33703350. 81 |
| M290T497   | 290. 1012244 | 497. 214 | 6592096. 596 |
| M290T389   | 290. 1018411 | 389. 035 | 4715461. 638 |
| M290T332   | 290. 1035951 | 332. 2   | 1621867. 038 |
| M290T378   | 290. 1123864 | 377. 704 | 1593737. 763 |
| M290T161   | 290. 1218625 | 161. 494 | 32232340. 54 |
| M290T144_1 | 290. 1234295 | 143. 959 | 111390245. 9 |
| M290T95    | 290. 1219168 | 94. 7467 | 38421744. 76 |
| M290T87    | 290. 123245  | 86. 6643 | 20645831. 01 |
| M290T425   | 290. 1224113 | 424. 572 | 4683999. 329 |
| M290T175   | 290. 1218163 | 174. 865 | 17671368. 59 |
| M290T107   | 290. 1234441 | 106. 513 | 453122754. 4 |
| M290T351_2 | 290. 1381283 | 351. 348 | 4279066. 817 |
| M290T206   | 290. 1399311 | 205. 903 | 12175756. 97 |
| M290T144_2 | 290. 1347732 | 143. 959 | 29947125. 79 |
| M290T158   | 290. 1346971 | 157. 773 | 20055952. 97 |
| M290T106_2 | 290. 1350759 | 105. 503 | 77947661. 62 |
| M290T415   | 290. 1381963 | 414. 82  | 7126624. 554 |
| M290T405   | 290. 1380141 | 404. 872 | 14108362. 7  |
| M290T548   | 290. 137568  | 548. 114 | 1564453. 704 |
| M290T482   | 290. 138016  | 482. 436 | 5546351. 822 |
| M290T382   | 290. 1386599 | 382. 125 | 7872256. 174 |
| M290T173   | 290. 134701  | 173. 407 | 8378902. 657 |
| M290T318   | 290. 1341964 | 318. 497 | 4027914. 765 |
| M290T230   | 290. 1403104 | 230. 321 | 86590883. 87 |
| M290T147   | 290. 1510186 | 146. 742 | 2885880. 684 |
| M290T237   | 290. 1523584 | 237. 171 | 41580576. 7  |
| M290T260   | 290. 152056  | 259. 74  | 50430084. 4  |
| M290T110   | 290. 1495372 | 110. 047 | 16193904. 36 |
| M290T301   | 290. 1522078 | 300. 782 | 67919474. 64 |
| M290T190_2 | 290. 159296  | 189. 571 | 9535599. 162 |
| M290T499   | 290. 1604287 | 498. 645 | 1831596. 226 |
| M290T169   | 290. 1581746 | 169. 221 | 8238034. 44  |
| M290T178   | 290. 1580921 | 178. 408 | 12769232. 67 |
| M290T351_3 | 290. 1697972 | 351. 348 | 6862209. 271 |
| M290T293   | 290. 1698952 | 292. 623 | 8966893. 016 |

|            |              |          |              |
|------------|--------------|----------|--------------|
| M290T336   | 290. 169545  | 336. 344 | 4430664. 682 |
| M290T359_2 | 290. 1688411 | 359. 32  | 6258602. 233 |
| M290T803   | 290. 1774011 | 802. 88  | 2447098. 068 |
| M290T582   | 290. 1942295 | 581. 625 | 8833477. 188 |
| M290T420   | 290. 1942834 | 420. 274 | 2140084. 278 |
| M290T666   | 290. 209543  | 666. 137 | 8516976. 507 |
| M290T706_2 | 290. 2106493 | 706. 229 | 20164634. 74 |
| M290T653   | 290. 2095163 | 653. 147 | 6237066. 784 |
| M291T357   | 290. 8414536 | 356. 74  | 2752820. 742 |
| M291T82    | 290. 8494824 | 82. 0569 | 461958286. 7 |
| M291T167   | 290. 9812942 | 166. 613 | 9454284. 569 |
| M291T331   | 291. 0012915 | 330. 809 | 3811125. 923 |
| M291T164   | 291. 0097133 | 163. 846 | 2942544. 671 |
| M291T121   | 291. 0177461 | 120. 525 | 20421403. 32 |
| M291T111   | 291. 0177005 | 111. 382 | 7621153. 554 |
| M291T263   | 291. 0335641 | 262. 529 | 1062126. 084 |
| M291T443   | 291. 0472359 | 443. 256 | 122788762. 2 |
| M291T144   | 291. 0700634 | 143. 959 | 15477719. 27 |
| M291T168   | 291. 0699234 | 167. 804 | 13716897. 24 |
| M291T298   | 291. 0695564 | 298. 135 | 3446916. 33  |
| M291T156_1 | 291. 0699758 | 156. 393 | 17320216. 05 |
| M291T284   | 291. 0696112 | 284. 377 | 3546854. 786 |
| M291T652   | 291. 0913738 | 651. 956 | 3946809. 87  |
| M291T659   | 291. 0908432 | 658. 953 | 9388555. 922 |
| M291T293   | 291. 0953994 | 292. 623 | 9508675. 111 |
| M291T106_1 | 291. 0948867 | 105. 503 | 15544261. 43 |
| M291T533   | 291. 0966432 | 532. 526 | 51418476. 46 |
| M291T278   | 291. 1074259 | 277. 699 | 7987633. 536 |
| M291T354   | 291. 1060822 | 353. 978 | 5973887. 737 |
| M291T165   | 291. 116729  | 165. 217 | 3067839. 547 |
| M291T197   | 291. 1196124 | 196. 644 | 3097268. 446 |
| M291T93    | 291. 1167564 | 92. 7272 | 33838604. 53 |
| M291T104_1 | 291. 1167226 | 104. 493 | 27780784. 37 |
| M291T122   | 291. 1276665 | 122. 007 | 50961841. 58 |
| M291T106_2 | 291. 1274696 | 105. 503 | 365027647. 4 |
| M291T425   | 291. 1360959 | 424. 572 | 4297308. 766 |
| M291T396   | 291. 1324506 | 396. 415 | 14615736. 29 |
| M291T347   | 291. 1329021 | 347. 175 | 5906633. 107 |
| M291T232   | 291. 1437799 | 231. 773 | 8743029. 108 |
| M291T102   | 291. 1542283 | 102. 247 | 3249526. 903 |
| M291T109   | 291. 153266  | 108. 698 | 2581595. 806 |
| M291T641   | 291. 1566873 | 640. 717 | 5454648. 667 |
| M291T807   | 291. 1587355 | 807. 232 | 5898011. 895 |
| M291T796   | 291. 158802  | 796. 474 | 16466391. 07 |
| M291T260   | 291. 1543068 | 259. 74  | 7053855. 795 |
| M291T718   | 291. 1566931 | 717. 959 | 6273271. 294 |
| M291T611   | 291. 1579261 | 611. 145 | 4494965. 449 |
| M291T780   | 291. 1564368 | 780. 043 | 5321490. 193 |
| M291T237   | 291. 1544328 | 237. 171 | 5744001. 782 |
| M291T301   | 291. 1541448 | 300. 782 | 8695753. 143 |
| M291T212   | 291. 1541235 | 212. 448 | 12773215. 47 |
| M291T156_2 | 291. 1648698 | 156. 393 | 2482623. 516 |
| M291T415   | 291. 1690797 | 414. 82  | 1773150. 294 |
| M291T104_2 | 291. 164609  | 104. 493 | 24741266. 47 |



|            |              |          |              |
|------------|--------------|----------|--------------|
| M291T475   | 291. 1825936 | 475. 007 | 9281664. 181 |
| M291T440   | 291. 1798297 | 440. 459 | 2729101. 224 |
| M291T730   | 291. 1839011 | 729. 798 | 10804434. 15 |
| M291T829   | 291. 1918519 | 828. 73  | 9961971. 595 |
| M291T764   | 291. 1928502 | 763. 856 | 8368421. 91  |
| M291T811   | 291. 1926083 | 811. 413 | 91669356. 82 |
| M291T838   | 291. 192829  | 837. 524 | 4627157. 85  |
| M291T756   | 291. 1943119 | 755. 537 | 17303010. 62 |
| M291T820   | 291. 1927022 | 819. 78  | 24894985. 9  |
| M291T716   | 291. 1942713 | 716. 403 | 6724694. 652 |
| M291T744   | 291. 1945113 | 744. 182 | 13685011. 51 |
| M291T776   | 291. 1927103 | 776. 194 | 8995624. 51  |
| M291T792   | 291. 1934142 | 792. 146 | 15626312. 51 |
| M292T399   | 291. 6249047 | 399. 046 | 1245573. 691 |
| M292T82    | 291. 8494445 | 82. 0569 | 23122512. 35 |
| M292T320   | 292. 0247223 | 319. 758 | 1351231. 993 |
| M292T443   | 292. 0488482 | 443. 256 | 12291974. 27 |
| M292T462   | 292. 0786283 | 461. 845 | 3732686. 443 |
| M292T95_1  | 292. 0837018 | 94. 7467 | 4959385. 335 |
| M292T659   | 292. 0907496 | 658. 953 | 1401583. 212 |
| M292T311   | 292. 1013877 | 311. 445 | 11108986. 47 |
| M292T185   | 292. 1013738 | 185. 398 | 51487731. 08 |
| M292T163_1 | 292. 1013459 | 162. 728 | 136415644. 4 |
| M292T147   | 292. 1013732 | 146. 742 | 96484115. 88 |
| M292T192   | 292. 1013472 | 192. 437 | 36191932. 72 |
| M292T390   | 292. 1025854 | 390. 432 | 13376996. 14 |
| M292T401   | 292. 1013622 | 400. 59  | 10036218. 3  |
| M292T210   | 292. 1014547 | 210. 186 | 15490338. 97 |
| M292T95_2  | 292. 101355  | 94. 7467 | 97143391. 32 |
| M292T124   | 292. 1013444 | 124. 487 | 71826989. 32 |
| M292T518   | 292. 1175991 | 517. 762 | 5898187. 14  |
| M292T393   | 292. 1156646 | 392. 715 | 9699602. 183 |
| M292T488   | 292. 1164475 | 488. 437 | 5788859. 8   |
| M292T378   | 292. 1156919 | 377. 704 | 29066823. 79 |
| M292T206   | 292. 1340932 | 205. 903 | 36653571. 22 |
| M292T422   | 292. 1285871 | 421. 784 | 9544510. 11  |
| M292T104   | 292. 1339096 | 104. 493 | 140664252. 8 |
| M292T426   | 292. 1402901 | 425. 909 | 1586873. 857 |
| M292T293   | 292. 1373208 | 292. 623 | 8781482. 296 |
| M292T155   | 292. 1374798 | 155. 197 | 324142418. 7 |
| M292T163_2 | 292. 1477057 | 162. 728 | 271915873    |
| M292T106   | 292. 1475089 | 105. 503 | 410792031. 5 |
| M292T143   | 292. 147685  | 142. 85  | 224182754    |
| M292T121   | 292. 1475179 | 120. 525 | 398634495. 6 |
| M292T216   | 292. 1475455 | 216. 359 | 59224964. 73 |
| M292T198   | 292. 1486937 | 198. 072 | 195829751. 4 |
| M292T111   | 292. 1545209 | 111. 382 | 211008124. 4 |
| M292T156   | 292. 1475568 | 156. 393 | 273357469. 1 |
| M292T402   | 292. 1535395 | 401. 963 | 5965638. 357 |
| M292T452   | 292. 1746674 | 451. 804 | 6755844. 243 |
| M292T301   | 292. 1731107 | 300. 782 | 3984060. 364 |
| M292T448   | 292. 1912991 | 447. 531 | 4197871. 396 |
| M292T811   | 292. 1971367 | 811. 413 | 16380736. 31 |
| M292T754   | 292. 197223  | 753. 987 | 2809859. 137 |

|            |              |          |              |
|------------|--------------|----------|--------------|
| M292T702   | 292. 2257179 | 702. 055 | 4685194. 482 |
| M292T765   | 292. 2599481 | 765. 406 | 13349865. 07 |
| M293T122_1 | 292. 5776562 | 122. 007 | 7501681. 088 |
| M293T113   | 292. 5776242 | 112. 781 | 4465725. 353 |
| M293T381   | 292. 6048441 | 380. 63  | 1856631. 07  |
| M293T449   | 292. 6922989 | 448. 978 | 483240. 4101 |
| M293T82    | 292. 8424971 | 82. 0569 | 190333212. 9 |
| M293T38    | 292. 9543866 | 38. 3208 | 1129874. 922 |
| M293T121_1 | 293. 007194  | 120. 525 | 20296941. 83 |
| M293T111_1 | 293. 0071292 | 111. 382 | 7714936. 107 |
| M293T129   | 293. 0601796 | 129. 234 | 8072695. 976 |
| M293T121_2 | 293. 078929  | 120. 525 | 2293582. 467 |
| M293T295   | 293. 086291  | 295. 356 | 2677889. 434 |
| M293T101_1 | 293. 0968192 | 101. 161 | 9345787. 888 |
| M293T164   | 293. 1054194 | 163. 846 | 16309301. 1  |
| M293T311   | 293. 1072264 | 311. 445 | 3710944. 614 |
| M293T147_1 | 293. 1055477 | 146. 742 | 12046298. 25 |
| M293T334   | 293. 1124792 | 333. 715 | 3759829. 991 |
| M293T403   | 293. 1112766 | 403. 447 | 10699313. 86 |
| M293T582   | 293. 1213378 | 581. 625 | 24650501. 38 |
| M293T104   | 293. 1325905 | 104. 493 | 16441273. 47 |
| M293T88    | 293. 1327227 | 87. 6739 | 18271170. 57 |
| M293T150   | 293. 136576  | 149. 65  | 9843946. 486 |
| M293T101_2 | 293. 1431228 | 101. 161 | 35232091. 08 |
| M293T158   | 293. 1410854 | 157. 773 | 12039214. 32 |
| M293T106   | 293. 1540268 | 105. 503 | 40790227. 28 |
| M293T163   | 293. 1543294 | 162. 728 | 29612857. 3  |
| M293T111_2 | 293. 1539856 | 111. 382 | 42789463. 86 |
| M293T328   | 293. 1486641 | 328. 106 | 4964001. 714 |
| M293T147_2 | 293. 1541991 | 146. 742 | 29212066. 84 |
| M293T122_2 | 293. 1541447 | 122. 007 | 41866164. 25 |
| M293T613   | 293. 1481472 | 612. 699 | 6688272. 07  |
| M293T218_1 | 293. 1528617 | 217. 866 | 6022712. 638 |
| M293T699   | 293. 1494502 | 699. 389 | 6687705. 866 |
| M293T436   | 293. 1589257 | 436. 069 | 4377641. 593 |
| M293T423   | 293. 1600429 | 423. 199 | 8849875. 123 |
| M293T293   | 293. 1696705 | 292. 623 | 64816438. 39 |
| M293T286   | 293. 169634  | 285. 9   | 41368578. 44 |
| M293T253   | 293. 1695239 | 253. 024 | 53467925. 4  |
| M293T260   | 293. 1695655 | 259. 74  | 36791714. 37 |
| M293T233   | 293. 1695217 | 233. 081 | 265939102. 6 |
| M293T302   | 293. 1695843 | 302. 191 | 26800210. 36 |
| M293T321   | 293. 1696033 | 321. 198 | 2426190. 822 |
| M293T767   | 293. 174364  | 766. 742 | 6307159. 062 |
| M293T584   | 293. 1735029 | 584. 417 | 8348867. 925 |
| M293T709   | 293. 1710086 | 709. 106 | 4535315. 958 |
| M293T818   | 293. 1731295 | 818. 418 | 16085555. 79 |
| M293T527   | 293. 1729846 | 526. 676 | 2945239. 059 |
| M293T268   | 293. 1721286 | 268. 427 | 58300539. 29 |
| M293T787   | 293. 1730991 | 786. 569 | 15742670. 34 |
| M293T659   | 293. 1713425 | 658. 953 | 3961257. 986 |
| M293T802   | 293. 1731589 | 801. 685 | 14048262. 72 |
| M293T744   | 293. 173039  | 744. 182 | 27372734. 57 |
| M293T776   | 293. 1731182 | 776. 194 | 40901147. 1  |

|            |              |          |              |
|------------|--------------|----------|--------------|
| M293T80    | 293. 1802794 | 79. 643  | 146999632. 7 |
| M293T218_2 | 293. 1803875 | 217. 866 | 3048909. 663 |
| M293T655   | 293. 1892699 | 654. 542 | 2532674. 003 |
| M293T794   | 293. 209625  | 793. 649 | 63165222. 03 |
| M293T680   | 293. 2095845 | 680. 402 | 40097149. 2  |
| M293T838   | 293. 2094445 | 837. 524 | 121261745. 4 |
| M293T756   | 293. 2095355 | 755. 537 | 14521086. 05 |
| M293T716   | 293. 2114617 | 716. 403 | 33525594. 94 |
| M293T820   | 293. 2094935 | 819. 78  | 39427597. 87 |
| M293T803   | 293. 2096384 | 802. 88  | 27082329. 72 |
| M293T781   | 293. 2095163 | 781. 303 | 44950739. 85 |
| M293T642   | 293. 2290608 | 642. 211 | 1155487. 946 |
| M293T317   | 293. 4983278 | 317. 199 | 1135511. 127 |
| M294T411   | 293. 6904675 | 410. 542 | 2730568. 735 |
| M294T161   | 294. 0818845 | 161. 494 | 3746978. 296 |
| M294T199   | 294. 080203  | 199. 43  | 2745542. 8   |
| M294T145   | 294. 0809407 | 145. 382 | 5176426. 379 |
| M294T419   | 294. 0945794 | 418. 97  | 2907165. 555 |
| M294T169   | 294. 0989635 | 169. 221 | 30628126. 05 |
| M294T458   | 294. 0953303 | 457. 576 | 9391482. 805 |
| M294T371   | 294. 0953764 | 370. 777 | 6789965. 627 |
| M294T310_1 | 294. 1047936 | 310. 075 | 284276. 6753 |
| M294T144   | 294. 1169347 | 143. 959 | 12701301. 94 |
| M294T172   | 294. 1168496 | 171. 935 | 12446869. 39 |
| M294T94    | 294. 1163878 | 93. 7378 | 48551707. 97 |
| M294T557   | 294. 1312214 | 556. 816 | 6749556. 551 |
| M294T367   | 294. 1320869 | 366. 514 | 9510346. 092 |
| M294T787   | 294. 1347248 | 786. 569 | 19485279. 47 |
| M294T435   | 294. 1431834 | 434. 589 | 7209443. 496 |
| M294T399   | 294. 142069  | 399. 046 | 4445890. 764 |
| M294T332   | 294. 1462422 | 332. 2   | 7503027. 374 |
| M294T229   | 294. 1526817 | 229. 059 | 266486893    |
| M294T310_2 | 294. 1526188 | 310. 075 | 224816117. 2 |
| M294T321   | 294. 1480715 | 321. 198 | 10057564. 29 |
| M294T614   | 294. 1514858 | 614. 215 | 894130. 9278 |
| M294T293   | 294. 1527409 | 292. 623 | 1857210989   |
| M294T257   | 294. 1527059 | 257. 155 | 1386582367   |
| M294T279   | 294. 1527338 | 279. 039 | 949602084. 3 |
| M294T211   | 294. 1526942 | 211. 288 | 224190065    |
| M294T143   | 294. 1661011 | 142. 85  | 17369924. 5  |
| M294T151   | 294. 1665206 | 151. 016 | 13134308. 9  |
| M294T107   | 294. 1639232 | 106. 513 | 76099080. 41 |
| M294T233   | 294. 1712587 | 233. 081 | 29419471. 81 |
| M294T433   | 294. 168379  | 433. 111 | 2439832. 515 |
| M294T777   | 294. 181518  | 777. 245 | 117080963. 8 |
| M294T392   | 294. 1899872 | 391. 678 | 10608515. 5  |
| M294T80    | 294. 1829537 | 79. 643  | 14825169. 55 |
| M294T794   | 294. 2120196 | 793. 649 | 11021534. 31 |
| M294T588   | 294. 2108252 | 587. 521 | 10117877. 57 |
| M294T680   | 294. 213898  | 680. 402 | 7087037. 694 |
| M294T838   | 294. 2142459 | 837. 524 | 23357189. 15 |
| M294T354   | 294. 2281618 | 353. 978 | 1517628. 306 |
| M294T836   | 294. 2415597 | 836. 034 | 3420011. 168 |
| M294T826   | 294. 2414263 | 825. 74  | 1644507. 578 |

|            |              |          |              |
|------------|--------------|----------|--------------|
| M295T798   | 294. 6056353 | 797. 773 | 7883043. 681 |
| M295T445   | 294. 6792595 | 444. 725 | 1753834. 614 |
| M295T82    | 294. 8417497 | 82. 0569 | 20945583. 63 |
| M295T36    | 294. 8610122 | 35. 8675 | 3751938. 45  |
| M295T57    | 294. 861067  | 57. 4179 | 1652243. 059 |
| M295T49    | 294. 8610471 | 48. 7362 | 2183111. 462 |
| M295T67    | 294. 8610624 | 66. 9841 | 1742798. 953 |
| M295T448_1 | 294. 8598429 | 447. 531 | 14826824. 62 |
| M295T180   | 295. 0775729 | 179. 75  | 7541795. 661 |
| M295T784   | 295. 0812366 | 783. 78  | 1576102. 389 |
| M295T456   | 295. 0916449 | 456. 126 | 1852095. 547 |
| M295T106   | 295. 0967289 | 105. 503 | 4625886. 53  |
| M295T645   | 295. 1008682 | 645. 278 | 29650150. 43 |
| M295T605   | 295. 1012332 | 605. 264 | 24499133. 75 |
| M295T670   | 295. 1007359 | 670. 166 | 44169014. 64 |
| M295T620   | 295. 1006592 | 620. 172 | 83498292. 84 |
| M295T545   | 295. 100739  | 545. 203 | 136695564    |
| M295T632   | 295. 1008357 | 631. 982 | 60621418. 09 |
| M295T102   | 295. 112117  | 102. 247 | 104948808. 6 |
| M295T89    | 295. 1121015 | 88. 6838 | 3521283354   |
| M295T426_1 | 295. 1107993 | 425. 909 | 1975328. 621 |
| M295T408   | 295. 1270485 | 407. 724 | 8353563. 8   |
| M295T286_1 | 295. 1238856 | 285. 9   | 11804913. 07 |
| M295T426_2 | 295. 1271025 | 425. 909 | 21930689. 6  |
| M295T353   | 295. 1277339 | 352. 65  | 12174182. 77 |
| M295T338   | 295. 1277151 | 337. 767 | 14294534. 9  |
| M295T411   | 295. 1374646 | 410. 542 | 2243029. 063 |
| M295T316   | 295. 1386168 | 315. 701 | 6734086. 133 |
| M295T286_2 | 295. 1548333 | 285. 9   | 82837657. 39 |
| M295T293   | 295. 1566433 | 292. 623 | 178717134. 5 |
| M295T229   | 295. 1565687 | 229. 059 | 33025994. 53 |
| M295T279   | 295. 1566305 | 279. 039 | 120307412. 8 |
| M295T310   | 295. 1564422 | 310. 075 | 26549508. 87 |
| M295T258   | 295. 1566042 | 258. 489 | 185963765. 1 |
| M295T211   | 295. 1565834 | 211. 288 | 29351035. 13 |
| M295T435   | 295. 1650069 | 434. 589 | 16231241. 86 |
| M295T416   | 295. 165023  | 416. 239 | 11054354. 74 |
| M295T405   | 295. 1636994 | 404. 872 | 13157282. 39 |
| M295T394   | 295. 1639612 | 393. 934 | 16096815. 16 |
| M295T422   | 295. 1757168 | 421. 784 | 7147152. 422 |
| M295T234   | 295. 1746616 | 234. 447 | 3972379. 698 |
| M295T619   | 295. 1865049 | 618. 683 | 4531121. 018 |
| M295T533   | 295. 1890744 | 532. 526 | 4448924. 266 |
| M295T776_1 | 295. 1891168 | 776. 194 | 49483926. 61 |
| M295T448_2 | 295. 1937773 | 447. 531 | 8106407. 642 |
| M295T588   | 295. 209429  | 587. 521 | 4606543. 836 |
| M295T791   | 295. 2250611 | 790. 802 | 86611189. 59 |
| M295T838   | 295. 2227309 | 837. 524 | 117528516. 9 |
| M295T762   | 295. 2209857 | 762. 439 | 64136005. 67 |
| M295T737   | 295. 2251037 | 737. 198 | 28408111. 35 |
| M295T776_2 | 295. 221059  | 776. 194 | 48694349. 37 |
| M295T705   | 295. 2262888 | 704. 715 | 268404654. 3 |
| M295T816   | 295. 2263255 | 815. 517 | 460416624. 6 |
| M295T562   | 295. 2408693 | 561. 955 | 17782806. 34 |

|          |              |          |              |
|----------|--------------|----------|--------------|
| M296T522 | 295. 6962339 | 522. 177 | 1268758. 971 |
| M296T69  | 295. 8950113 | 69. 2834 | 3733545. 43  |
| M296T44  | 295. 8948767 | 44. 1485 | 11195241. 2  |
| M296T445 | 296. 0712435 | 444. 725 | 4515102. 999 |
| M296T261 | 296. 072471  | 261. 177 | 11377924. 7  |
| M296T308 | 296. 0978033 | 307. 735 | 8124895. 024 |
| M296T190 | 296. 097865  | 189. 571 | 29059264. 79 |
| M296T103 | 296. 0957895 | 103. 423 | 45785650. 42 |
| M296T143 | 296. 0982448 | 142. 85  | 7464562. 126 |
| M296T210 | 296. 096171  | 210. 186 | 21303454. 95 |
| M296T123 | 296. 0959691 | 123. 262 | 6802554. 718 |
| M296T91  | 296. 0960018 | 90. 7088 | 857151520. 4 |
| M296T276 | 296. 0978716 | 276. 414 | 2774257. 833 |
| M296T620 | 296. 1037228 | 620. 172 | 9376190. 785 |
| M296T545 | 296. 1052818 | 545. 203 | 14129381. 98 |
| M296T632 | 296. 1037328 | 631. 982 | 7490267. 426 |
| M296T187 | 296. 1109338 | 186. 709 | 20193530. 18 |
| M296T459 | 296. 1112484 | 458. 985 | 5784646. 743 |
| M296T205 | 296. 1111705 | 204. 747 | 10068727. 28 |
| M296T420 | 296. 1111169 | 420. 274 | 28497037. 51 |
| M296T252 | 296. 1111172 | 251. 555 | 5535066. 503 |
| M296T168 | 296. 1113859 | 167. 804 | 13491167. 51 |
| M296T491 | 296. 1112127 | 491. 373 | 4479450. 425 |
| M296T89  | 296. 1146218 | 88. 6838 | 355945886. 1 |
| M296T321 | 296. 1149508 | 321. 198 | 12942689. 56 |
| M296T372 | 296. 1229325 | 372. 152 | 6991381. 876 |
| M296T142 | 296. 1322866 | 141. 825 | 27291518. 51 |
| M296T509 | 296. 1270719 | 508. 883 | 1450148. 183 |
| M296T104 | 296. 1321909 | 104. 493 | 622312277. 7 |
| M296T787 | 296. 1354281 | 786. 569 | 3706942. 183 |
| M296T334 | 296. 1474435 | 333. 715 | 15630778. 63 |
| M296T346 | 296. 1472224 | 345. 848 | 7689678. 911 |
| M296T747 | 296. 1449462 | 746. 977 | 7069590. 426 |
| M296T737 | 296. 14499   | 737. 198 | 9558298. 242 |
| M296T318 | 296. 1474412 | 318. 497 | 16316613. 96 |
| M296T772 | 296. 1443618 | 772. 206 | 3142097. 175 |
| M296T80  | 296. 1520496 | 79. 643  | 1710320. 876 |
| M296T374 | 296. 1485371 | 373. 532 | 12943452. 96 |
| M296T293 | 296. 1583104 | 292. 623 | 26187470. 05 |
| M296T389 | 296. 1594767 | 389. 035 | 4814293. 272 |
| M296T257 | 296. 1582588 | 257. 155 | 23400574. 23 |
| M296T280 | 296. 1581906 | 280. 345 | 22148083. 83 |
| M296T604 | 296. 1628188 | 603. 95  | 1650782. 54  |
| M296T731 | 296. 1665103 | 731. 347 | 2198259. 026 |
| M296T222 | 296. 1691626 | 222. 017 | 3035840. 261 |
| M296T291 | 296. 1702136 | 291. 307 | 13358071. 89 |
| M296T525 | 296. 1847065 | 525. 132 | 11444297. 81 |
| M296T776 | 296. 1924479 | 776. 194 | 8689016. 591 |
| M296T705 | 296. 2281844 | 704. 715 | 49732312. 62 |
| M296T838 | 296. 2286019 | 837. 524 | 11458879. 08 |
| M296T814 | 296. 2301712 | 814. 095 | 85430535. 47 |
| M296T544 | 296. 2429885 | 544. 056 | 8538908. 667 |
| M296T770 | 296. 291978  | 769. 702 | 29687371. 92 |
| M297T445 | 296. 5740281 | 444. 725 | 1254610. 418 |

|            |              |          |              |
|------------|--------------|----------|--------------|
| M297T84    | 297. 0349734 | 83. 5661 | 19197806. 73 |
| M297T57    | 297. 0812583 | 57. 4179 | 1850434. 989 |
| M297T31    | 297. 0791384 | 31. 4047 | 9331418. 465 |
| M297T66    | 297. 0812388 | 65. 7101 | 1421493. 477 |
| M297T45    | 297. 0811914 | 45. 3435 | 1104274. 293 |
| M297T91    | 297. 099392  | 90. 7088 | 90830916. 95 |
| M297T334   | 297. 1067688 | 333. 715 | 7921240. 712 |
| M297T191   | 297. 1072645 | 190. 962 | 7258775. 456 |
| M297T211   | 297. 1057242 | 211. 288 | 6398146. 924 |
| M297T420   | 297. 1150689 | 420. 274 | 4074648. 054 |
| M297T468   | 297. 1224009 | 467. 706 | 3163068. 439 |
| M297T487   | 297. 118822  | 486. 885 | 1462032. 375 |
| M297T89    | 297. 1163059 | 88. 6838 | 59977817. 09 |
| M297T393   | 297. 1286195 | 392. 715 | 4289833. 638 |
| M297T104   | 297. 1357454 | 104. 493 | 43419963. 09 |
| M297T308   | 297. 1449531 | 307. 735 | 8743393. 764 |
| M297T96    | 297. 1377126 | 95. 7572 | 6355274. 11  |
| M297T329   | 297. 1552017 | 329. 481 | 15824302. 6  |
| M297T398   | 297. 1552805 | 397. 878 | 17312658. 25 |
| M297T345   | 297. 1553455 | 344. 555 | 24808216. 42 |
| M297T359   | 297. 1559846 | 359. 32  | 14104998. 91 |
| M297T385   | 297. 1552649 | 385. 081 | 841373621    |
| M297T632   | 297. 1660002 | 631. 982 | 7955897. 127 |
| M297T325   | 297. 1808068 | 325. 35  | 5994802. 195 |
| M297T764   | 297. 2051004 | 763. 856 | 194675895. 8 |
| M297T814   | 297. 2039272 | 814. 095 | 8367747. 71  |
| M297T705   | 297. 2330492 | 704. 715 | 4969461. 345 |
| M297T768   | 297. 2318417 | 768. 166 | 5545628. 289 |
| M297T817   | 297. 2426696 | 816. 953 | 236171616. 2 |
| M297T649   | 297. 2555541 | 649. 338 | 11754507. 81 |
| M297T562   | 297. 2560769 | 561. 955 | 61483588. 13 |
| M297T703   | 297. 2560246 | 703. 35  | 12245292. 05 |
| M298T199   | 298. 0768337 | 199. 43  | 10024145. 46 |
| M298T388   | 298. 0939069 | 387. 763 | 102980902. 5 |
| M298T308   | 298. 1024452 | 307. 735 | 9237960. 256 |
| M298T91    | 298. 1012931 | 90. 7088 | 14851965. 93 |
| M298T207   | 298. 1117757 | 207. 393 | 7724290. 776 |
| M298T325   | 298. 1157368 | 325. 35  | 6713492. 103 |
| M298T106_1 | 298. 1133295 | 105. 503 | 13100380. 49 |
| M298T334   | 298. 1157603 | 333. 715 | 21366782. 04 |
| M298T143   | 298. 1141112 | 142. 85  | 18304745. 4  |
| M298T263   | 298. 1264395 | 262. 529 | 26597116. 74 |
| M298T205   | 298. 1262073 | 204. 747 | 21359192. 46 |
| M298T293   | 298. 1263581 | 292. 623 | 25931405. 92 |
| M298T573   | 298. 1268027 | 573. 072 | 3031068. 147 |
| M298T494   | 298. 1247996 | 494. 289 | 9219632. 521 |
| M298T375   | 298. 1287376 | 375. 021 | 13788059. 78 |
| M298T396   | 298. 1285893 | 396. 415 | 19385027. 96 |
| M298T725   | 298. 1426323 | 725. 212 | 4227561. 523 |
| M298T183   | 298. 1364817 | 182. 574 | 6671266. 095 |
| M298T314_1 | 298. 1383971 | 314. 259 | 61935846. 94 |
| M298T106_2 | 298. 1378284 | 105. 503 | 11035501. 86 |
| M298T331   | 298. 1386034 | 330. 809 | 16350121. 1  |
| M298T324   | 298. 1384331 | 323. 984 | 17597284. 42 |

|            |              |          |              |
|------------|--------------|----------|--------------|
| M298T198   | 298. 1368662 | 198. 072 | 5510141. 346 |
| M298T310   | 298. 1489014 | 310. 075 | 6811810. 166 |
| M298T167   | 298. 1500787 | 166. 613 | 5678196. 023 |
| M298T121   | 298. 1487104 | 120. 525 | 23748480. 62 |
| M298T150   | 298. 1487584 | 149. 65  | 23562311. 59 |
| M298T219   | 298. 150004  | 219. 233 | 109623440. 2 |
| M298T106_3 | 298. 1488108 | 105. 503 | 8226333. 693 |
| M298T302   | 298. 1636028 | 302. 191 | 9029984. 9   |
| M298T385   | 298. 1610865 | 385. 081 | 90725926. 97 |
| M298T354   | 298. 1634924 | 353. 978 | 11489209. 33 |
| M298T314_2 | 298. 1836105 | 314. 259 | 9870778. 524 |
| M298T252   | 298. 1844966 | 251. 555 | 4411044. 47  |
| M298T335   | 298. 1866444 | 334. 966 | 30223249. 96 |
| M298T305   | 298. 1835072 | 304. 777 | 27184266. 81 |
| M298T631   | 298. 2002678 | 630. 507 | 2404145. 229 |
| M298T561   | 298. 2366936 | 560. 942 | 42767939. 01 |
| M298T789   | 298. 2356912 | 789. 293 | 3491795. 05  |
| M298T545   | 298. 2368271 | 545. 203 | 45507935. 51 |
| M298T817   | 298. 2456043 | 816. 953 | 46711934. 77 |
| M298T776   | 298. 2720786 | 776. 194 | 215750417. 2 |
| M298T791   | 298. 3081525 | 790. 802 | 67171794. 17 |
| M298T814   | 298. 3078687 | 814. 095 | 6684228. 166 |
| M298T780   | 298. 3081302 | 780. 043 | 18667028. 77 |
| M299T814   | 298. 5973554 | 814. 095 | 11920704. 32 |
| M299T211   | 298. 9854446 | 211. 288 | 6279421. 536 |
| M299T613   | 299. 0898683 | 612. 699 | 1147099. 391 |
| M299T525   | 299. 0945039 | 525. 132 | 22778875. 9  |
| M299T351   | 299. 122259  | 351. 348 | 4230257. 395 |
| M299T332   | 299. 1222129 | 332. 2   | 3804741. 188 |
| M299T308_1 | 299. 1228689 | 307. 735 | 4733046. 61  |
| M299T374   | 299. 1216197 | 373. 532 | 39328018. 11 |
| M299T342   | 299. 1225466 | 341. 802 | 4437515. 483 |
| M299T318   | 299. 1222712 | 318. 497 | 23493614. 36 |
| M299T364   | 299. 1215864 | 363. 58  | 10556326. 52 |
| M299T106   | 299. 1326133 | 105. 503 | 7703465. 1   |
| M299T261   | 299. 1326305 | 261. 177 | 7932003. 045 |
| M299T203   | 299. 1353362 | 203. 36  | 9165183. 608 |
| M299T390   | 299. 1328106 | 390. 432 | 7299329. 959 |
| M299T461   | 299. 1386139 | 460. 537 | 3866446. 384 |
| M299T302   | 299. 1359015 | 302. 191 | 17114084. 95 |
| M299T338   | 299. 1338546 | 337. 767 | 6719667. 562 |
| M299T316   | 299. 1356769 | 315. 701 | 7802011. 505 |
| M299T324   | 299. 1357998 | 323. 984 | 8692039. 008 |
| M299T219   | 299. 1509614 | 219. 233 | 11273770. 56 |
| M299T297   | 299. 1589034 | 296. 739 | 5025239. 376 |
| M299T385   | 299. 1595188 | 385. 081 | 12048824. 8  |
| M299T104   | 299. 1584524 | 104. 493 | 22643919. 03 |
| M299T308_2 | 299. 1696713 | 307. 735 | 18838666. 19 |
| M299T430   | 299. 1718267 | 430. 131 | 8187928. 865 |
| M299T82    | 299. 1890514 | 82. 0569 | 6052503. 806 |
| M299T459   | 299. 2356842 | 458. 985 | 710513. 6632 |
| M299T669   | 299. 2343735 | 668. 867 | 14020687. 06 |
| M299T562   | 299. 2355601 | 561. 955 | 69015067. 76 |
| M299T31_1  | 299. 2563982 | 31. 4047 | 1554075. 803 |

|            |              |          |              |
|------------|--------------|----------|--------------|
| M299T830   | 299. 2565751 | 830. 193 | 10216811. 41 |
| M299T649   | 299. 272432  | 649. 338 | 10612714. 32 |
| M299T703   | 299. 2724878 | 703. 35  | 12234231. 91 |
| M299T31_2  | 299. 2919086 | 31. 4047 | 1604436. 918 |
| M299T791   | 299. 312844  | 790. 802 | 13406235. 01 |
| M300T321   | 299. 5821012 | 321. 198 | 1783837. 46  |
| M300T32    | 299. 6322659 | 32. 4171 | 11074569. 08 |
| M300T127   | 300. 03853   | 126. 785 | 9365285. 892 |
| M300T332   | 300. 0694995 | 332. 2   | 26007820. 65 |
| M300T144   | 300. 0703842 | 143. 959 | 3465069. 707 |
| M300T309   | 300. 0794859 | 308. 967 | 3555449. 954 |
| M300T317   | 300. 0781245 | 317. 199 | 4708344. 24  |
| M300T102_1 | 300. 0857699 | 102. 247 | 20428589. 88 |
| M300T106_1 | 300. 1065069 | 105. 503 | 10557982. 99 |
| M300T443   | 300. 106516  | 443. 256 | 9308460. 088 |
| M300T306   | 300. 1084797 | 306. 247 | 3725993. 698 |
| M300T339   | 300. 1082733 | 339. 085 | 3562162. 695 |
| M300T164   | 300. 1171788 | 163. 846 | 43348433. 17 |
| M300T328   | 300. 1163938 | 328. 106 | 17201451. 33 |
| M300T290   | 300. 1176972 | 289. 912 | 120210594. 4 |
| M300T225   | 300. 1173583 | 224. 729 | 48965971. 67 |
| M300T96    | 300. 1178396 | 95. 7572 | 2929743. 214 |
| M300T192_1 | 300. 1172195 | 192. 437 | 43333340. 84 |
| M300T176   | 300. 11695   | 175. 952 | 50814963. 63 |
| M300T276   | 300. 1176247 | 276. 414 | 22895003. 05 |
| M300T519   | 300. 1285595 | 519. 257 | 2402847. 819 |
| M300T129   | 300. 1273755 | 129. 234 | 10856612. 18 |
| M300T374   | 300. 1274916 | 373. 532 | 4808404. 183 |
| M300T31    | 300. 1334581 | 31. 4047 | 3003242. 816 |
| M300T293_1 | 300. 1414307 | 292. 623 | 63649483. 54 |
| M300T106_2 | 300. 1428412 | 105. 503 | 10371704. 57 |
| M300T252   | 300. 143437  | 251. 555 | 44681622. 22 |
| M300T533   | 300. 1435226 | 532. 526 | 6989755. 149 |
| M300T171   | 300. 1433883 | 170. 665 | 4891794. 867 |
| M300T218   | 300. 1423069 | 217. 866 | 30459275. 11 |
| M300T388   | 300. 1577084 | 387. 763 | 3372361. 782 |
| M300T335   | 300. 1532895 | 334. 966 | 7792630. 386 |
| M300T221   | 300. 1559217 | 220. 676 | 2714856. 486 |
| M300T449   | 300. 1567557 | 448. 978 | 4686408. 126 |
| M300T102_2 | 300. 1631452 | 102. 247 | 17462890. 27 |
| M300T97    | 300. 1632263 | 96. 7698 | 12956057. 36 |
| M300T293_2 | 300. 1656231 | 292. 623 | 31805878. 66 |
| M300T192_2 | 300. 1656818 | 192. 437 | 5831475. 691 |
| M300T308   | 300. 1732267 | 307. 735 | 1351546. 339 |
| M300T605   | 300. 1733207 | 605. 264 | 1669591. 662 |
| M300T392   | 300. 1792707 | 391. 678 | 48758101. 71 |
| M300T413   | 300. 191599  | 413. 295 | 10355237. 07 |
| M300T451   | 300. 1964559 | 450. 503 | 35250406. 92 |
| M300T422   | 300. 191501  | 421. 784 | 9572382. 925 |
| M300T438   | 300. 1965115 | 437. 571 | 9706369. 881 |
| M300T832   | 300. 1985534 | 831. 709 | 6154604. 335 |
| M300T469   | 300. 216143  | 469. 252 | 8593167. 189 |
| M300T803   | 300. 2522954 | 802. 88  | 889372. 9429 |
| M300T588   | 300. 2766718 | 587. 521 | 3890458. 308 |



|            |             |         |             |
|------------|-------------|---------|-------------|
| M300T776   | 300.2775451 | 776.194 | 2420631.204 |
| M300T795_1 | 300.2889847 | 795.165 | 21897509.55 |
| M300T784   | 300.288807  | 783.78  | 10661932.35 |
| M300T795_2 | 300.3247823 | 795.165 | 13915033.14 |
| M301T525   | 300.6051897 | 525.132 | 1080341.458 |
| M301T31    | 300.6315746 | 31.4047 | 2424598.491 |
| M301T425   | 301.0267013 | 424.572 | 3284150.123 |
| M301T477   | 301.0364639 | 476.554 | 1885718.98  |
| M301T158   | 301.053553  | 157.773 | 60540761.98 |
| M301T143   | 301.0535412 | 142.85  | 43316380.5  |
| M301T299   | 301.0538112 | 299.493 | 26576346.66 |
| M301T443_1 | 301.0543155 | 443.256 | 63844749.88 |
| M301T426   | 301.054113  | 425.909 | 66449691.91 |
| M301T332   | 301.0727716 | 332.2   | 2412017.06  |
| M301T126   | 301.0900968 | 125.598 | 3863861.02  |
| M301T114   | 301.0913248 | 114.15  | 1838613.446 |
| M301T101   | 301.1030872 | 101.161 | 24074075.57 |
| M301T185   | 301.1012518 | 185.398 | 15805806.28 |
| M301T757   | 301.1061722 | 757.001 | 7156489.868 |
| M301T474   | 301.1193817 | 473.597 | 22888544.32 |
| M301T530   | 301.1165682 | 529.713 | 2747787.169 |
| M301T290   | 301.1214769 | 289.912 | 14755327.36 |
| M301T192   | 301.1210865 | 192.437 | 3657027.045 |
| M301T301   | 301.1288984 | 300.782 | 3209342.513 |
| M301T418   | 301.1384138 | 417.676 | 2649706.583 |
| M301T485   | 301.1397265 | 485.471 | 2146762.741 |
| M301T90    | 301.1383907 | 89.6999 | 36355356.49 |
| M301T371   | 301.1384937 | 370.777 | 7386885.671 |
| M301T443_2 | 301.1383182 | 443.256 | 3031415.832 |
| M301T104_1 | 301.1373431 | 104.493 | 35099220.79 |
| M301T354   | 301.1386732 | 353.978 | 6206757.282 |
| M301T161   | 301.1479508 | 161.494 | 16776096.66 |
| M301T147   | 301.1481768 | 146.742 | 14738939.62 |
| M301T294   | 301.1498008 | 293.896 | 77049931.73 |
| M301T260   | 301.1501267 | 259.74  | 10542136.5  |
| M301T276   | 301.1497071 | 276.414 | 35657609.37 |
| M301T284   | 301.1499167 | 284.377 | 53882128.85 |
| M301T305   | 301.1500404 | 304.777 | 45165581.89 |
| M301T327   | 301.1497127 | 326.78  | 10535548.3  |
| M301T343   | 301.151878  | 343.226 | 2691401.513 |
| M301T95    | 301.1517933 | 94.7467 | 10007024.68 |
| M301T318   | 301.1501883 | 318.497 | 33194573.91 |
| M301T104_2 | 301.1495414 | 104.493 | 46303419.11 |
| M301T570   | 301.1631306 | 570.01  | 4708961.771 |
| M301T458   | 301.172224  | 457.576 | 957264.0568 |
| M301T390   | 301.1828838 | 390.432 | 5344500.617 |
| M301T413   | 301.1936158 | 413.295 | 1174515.995 |
| M301T420   | 301.1944018 | 420.274 | 890616.3669 |
| M301T832   | 301.1979004 | 831.709 | 3597975.532 |
| M301T295   | 301.1967337 | 295.356 | 3197654.78  |
| M301T669   | 301.2511745 | 668.867 | 13827935.06 |
| M301T649   | 301.2511382 | 649.338 | 8319730.279 |
| M301T562   | 301.2512036 | 561.955 | 53591331.11 |
| M301T810   | 301.2836003 | 810.052 | 882348.718  |

|            |              |          |              |
|------------|--------------|----------|--------------|
| M302T504   | 301. 5975392 | 504. 466 | 3011710. 142 |
| M302T329   | 301. 9973051 | 329. 481 | 4290400. 556 |
| M302T84    | 302. 0026863 | 83. 5661 | 5414804. 883 |
| M302T158   | 302. 0574435 | 157. 773 | 5588330. 908 |
| M302T443   | 302. 0600714 | 443. 256 | 7923799. 549 |
| M302T311   | 302. 0860279 | 311. 445 | 7661083. 234 |
| M302T293   | 302. 0860625 | 292. 623 | 2160732. 525 |
| M302T106   | 302. 0847741 | 105. 503 | 12287839. 4  |
| M302T143   | 302. 0860214 | 142. 85  | 14804963. 63 |
| M302T415_1 | 302. 1015576 | 414. 82  | 3196685. 313 |
| M302T551   | 302. 101047  | 550. 919 | 2494877. 954 |
| M302T513   | 302. 1246672 | 513. 285 | 1061077. 316 |
| M302T346   | 302. 1221933 | 345. 848 | 3823674. 769 |
| M302T295   | 302. 1221419 | 295. 356 | 7348149. 167 |
| M302T104_1 | 302. 1221775 | 104. 493 | 16851138. 4  |
| M302T228   | 302. 1284529 | 227. 633 | 35246294. 96 |
| M302T144   | 302. 1332898 | 143. 959 | 228405228. 8 |
| M302T180   | 302. 1333704 | 179. 75  | 522243850. 2 |
| M302T415_2 | 302. 1370352 | 414. 82  | 18225067. 61 |
| M302T165   | 302. 133333  | 165. 217 | 503247665. 6 |
| M302T121   | 302. 1333133 | 120. 525 | 827428114. 5 |
| M302T156   | 302. 1333158 | 156. 393 | 1021257146   |
| M302T294   | 302. 1532219 | 293. 896 | 17374076. 07 |
| M302T468   | 302. 1483323 | 467. 706 | 8019395. 808 |
| M302T187   | 302. 1581939 | 186. 709 | 4442155. 496 |
| M302T502   | 302. 1585232 | 501. 549 | 1394157. 604 |
| M302T104_2 | 302. 1588805 | 104. 493 | 5809817. 121 |
| M302T314   | 302. 1698434 | 314. 259 | 9773781. 7   |
| M302T241   | 302. 1688283 | 241. 368 | 2436518. 449 |
| M302T336   | 302. 1694009 | 336. 344 | 7534049. 381 |
| M302T358   | 302. 1696476 | 357. 958 | 9440016. 611 |
| M302T222   | 302. 1694865 | 222. 017 | 3650188. 111 |
| M302T818   | 302. 1743633 | 818. 418 | 10055268. 74 |
| M302T477   | 302. 1956176 | 476. 554 | 1180799. 741 |
| M302T375   | 302. 1937462 | 375. 021 | 66936047. 13 |
| M302T402   | 302. 1936917 | 401. 963 | 13238707. 23 |
| M302T386   | 302. 1936672 | 386. 352 | 21035446. 95 |
| M302T393   | 302. 2069001 | 392. 715 | 22956569. 31 |
| M302T657   | 302. 2306718 | 657. 451 | 2091500. 985 |
| M302T563   | 302. 2551733 | 563. 297 | 7934230. 01  |
| M302T775   | 302. 267794  | 774. 919 | 14212688. 43 |
| M302T784   | 302. 2677375 | 783. 78  | 9718463. 427 |
| M302T803   | 302. 3040176 | 802. 88  | 26309913. 51 |
| M302T783   | 302. 3030908 | 782. 558 | 11985510. 74 |
| M303T341   | 303. 002052  | 340. 548 | 862772. 7403 |
| M303T84    | 303. 0431173 | 83. 5661 | 10569565. 66 |
| M303T475   | 303. 0480082 | 475. 007 | 48914348. 96 |
| M303T638   | 303. 0493696 | 637. 996 | 6563987. 529 |
| M303T205_1 | 303. 0807062 | 204. 747 | 5530997. 487 |
| M303T211   | 303. 0807277 | 211. 288 | 6829097. 604 |
| M303T616   | 303. 1016443 | 615. 594 | 6065645. 755 |
| M303T144   | 303. 1170638 | 143. 959 | 17989852. 78 |
| M303T294   | 303. 1170486 | 293. 896 | 2726583. 006 |
| M303T449   | 303. 1206538 | 448. 978 | 3057000. 815 |

|            |              |          |              |
|------------|--------------|----------|--------------|
| M303T188   | 303. 1169337 | 188. 126 | 17118127. 21 |
| M303T104   | 303. 1169112 | 104. 493 | 18823118. 84 |
| M303T305   | 303. 1169816 | 304. 777 | 5557113. 902 |
| M303T205_2 | 303. 1283316 | 204. 747 | 19718289. 5  |
| M303T165   | 303. 1357525 | 165. 217 | 64337859. 74 |
| M303T121   | 303. 1356499 | 120. 525 | 105525463. 6 |
| M303T156   | 303. 135751  | 156. 393 | 126207930. 3 |
| M303T429   | 303. 1319152 | 428. 735 | 129261292. 8 |
| M303T180   | 303. 1382904 | 179. 75  | 58690212. 39 |
| M303T201   | 303. 1393012 | 200. 766 | 2435177. 595 |
| M303T309   | 303. 1544535 | 308. 967 | 7412926. 272 |
| M303T221   | 303. 1532478 | 220. 676 | 2690827. 748 |
| M303T87    | 303. 1532234 | 86. 6643 | 47033040. 41 |
| M303T314   | 303. 1657043 | 314. 259 | 8860150. 043 |
| M303T158   | 303. 1672976 | 157. 773 | 3395631. 152 |
| M303T291   | 303. 1656492 | 291. 307 | 4741549. 309 |
| M303T405   | 303. 1721476 | 404. 872 | 5560701. 911 |
| M303T91    | 303. 1657519 | 90. 7088 | 23383522. 97 |
| M303T376   | 303. 1769079 | 376. 409 | 4623751. 336 |
| M303T393   | 303. 2094871 | 392. 715 | 2033780. 195 |
| M303T748   | 303. 2308422 | 748. 486 | 12798433. 5  |
| M303T836   | 303. 2307861 | 836. 034 | 29531587. 53 |
| M303T813   | 303. 230096  | 812. 862 | 5601210. 711 |
| M303T756   | 303. 230925  | 755. 537 | 13558014. 78 |
| M303T692   | 303. 230545  | 692. 461 | 8320212. 063 |
| M303T487   | 303. 4649607 | 486. 885 | 1892236. 844 |
| M304T406   | 303. 5779035 | 406. 289 | 635352. 4685 |
| M304T375   | 303. 6644605 | 375. 021 | 2631658. 376 |
| M304T258   | 304. 0410083 | 258. 489 | 1189145. 772 |
| M304T446   | 304. 0423513 | 445. 984 | 1464230. 368 |
| M304T314   | 304. 0657104 | 314. 259 | 8133995. 328 |
| M304T429_1 | 304. 080206  | 428. 735 | 1708544. 9   |
| M304T477   | 304. 0874516 | 476. 554 | 557671. 1917 |
| M304T165   | 304. 0997212 | 165. 217 | 10150918. 6  |
| M304T143   | 304. 1015768 | 142. 85  | 78910625. 95 |
| M304T178   | 304. 1017767 | 178. 408 | 6980213. 788 |
| M304T104_1 | 304. 1014757 | 104. 493 | 52145468. 02 |
| M304T332   | 304. 116679  | 332. 2   | 30028979. 15 |
| M304T558   | 304. 1167102 | 557. 967 | 3395766. 614 |
| M304T493   | 304. 1139537 | 492. 895 | 4986520. 506 |
| M304T440_1 | 304. 1165907 | 440. 459 | 5332296. 965 |
| M304T280   | 304. 1166879 | 280. 345 | 1892383. 849 |
| M304T261   | 304. 1166569 | 261. 177 | 1973364. 102 |
| M304T411   | 304. 1265579 | 410. 542 | 3815588. 976 |
| M304T378_1 | 304. 1282005 | 377. 704 | 13788270. 75 |
| M304T371_1 | 304. 1417794 | 370. 777 | 7277732. 127 |
| M304T181   | 304. 1380354 | 181. 154 | 14093268. 3  |
| M304T291   | 304. 1380692 | 291. 307 | 14342287. 75 |
| M304T121   | 304. 1380719 | 120. 525 | 22413986. 98 |
| M304T172   | 304. 1380918 | 171. 935 | 8895532. 71  |
| M304T136   | 304. 138044  | 135. 971 | 4013798. 996 |
| M304T156   | 304. 1380937 | 156. 393 | 23946052. 43 |
| M304T104_2 | 304. 1379881 | 104. 493 | 39845411. 52 |
| M304T386   | 304. 1417375 | 386. 352 | 8220112. 401 |

|            |             |         |             |
|------------|-------------|---------|-------------|
| M304T429_2 | 304.1352144 | 428.735 | 23119813.08 |
| M304T33    | 304.1466733 | 33.467  | 4900661.76  |
| M304T223   | 304.1493945 | 223.474 | 22924196.58 |
| M304T279   | 304.1493437 | 279.039 | 9262454.395 |
| M304T318   | 304.1484038 | 318.497 | 11156582.29 |
| M304T104_3 | 304.1488103 | 104.493 | 7307396.02  |
| M304T93    | 304.1595889 | 92.7272 | 20299355.07 |
| M304T371_2 | 304.1626181 | 370.777 | 3657639.035 |
| M304T466   | 304.1645128 | 466.162 | 7531197.009 |
| M304T784   | 304.1725459 | 783.78  | 88660467.63 |
| M304T420   | 304.1742842 | 420.274 | 3245090.823 |
| M304T378_2 | 304.1745708 | 377.704 | 13717771.06 |
| M304T293   | 304.1842228 | 292.623 | 6593300.581 |
| M304T638   | 304.1870645 | 637.996 | 14255970.22 |
| M304T649   | 304.1869141 | 649.338 | 29034448.12 |
| M304T440_2 | 304.1821486 | 440.459 | 6081458.856 |
| M304T802   | 304.189484  | 801.685 | 2486266.903 |
| M304T535   | 304.2121191 | 535.329 | 3033979.072 |
| M304T524   | 304.212731  | 523.735 | 2180086.251 |
| M304T767   | 304.2839444 | 766.742 | 69792124.51 |
| M304T753   | 304.283784  | 752.541 | 10043998.25 |
| M305T60    | 304.891829  | 59.9075 | 2534009.22  |
| M305T37    | 304.8902255 | 37.1891 | 6430132.859 |
| M305T70    | 304.8902466 | 70.3428 | 1413162.058 |
| M305T212   | 305.0165198 | 212.448 | 4156202.259 |
| M305T294_1 | 305.0860266 | 293.896 | 13293939.63 |
| M305T329   | 305.0859488 | 329.481 | 9673554.156 |
| M305T103   | 305.0846586 | 103.423 | 18027711.15 |
| M305T143_1 | 305.0847408 | 142.85  | 12023723.7  |
| M305T339   | 305.0859476 | 339.085 | 4635362.828 |
| M305T429   | 305.0821245 | 428.735 | 1111154.088 |
| M305T439   | 305.1124963 | 439.021 | 1680114.039 |
| M305T122   | 305.132671  | 122.007 | 171611705.9 |
| M305T106   | 305.132664  | 105.503 | 920154845.1 |
| M305T165   | 305.1327594 | 165.217 | 54314619.37 |
| M305T143_2 | 305.1327039 | 142.85  | 1062621802  |
| M305T181   | 305.142814  | 181.154 | 10521229.96 |
| M305T210   | 305.1453836 | 210.186 | 18939211.7  |
| M305T197   | 305.1454137 | 196.644 | 9466359.393 |
| M305T232   | 305.1421749 | 231.773 | 2108746.869 |
| M305T131   | 305.1455815 | 130.668 | 33379106.81 |
| M305T104   | 305.1453182 | 104.493 | 73833015.99 |
| M305T222   | 305.1453576 | 222.017 | 7661774.773 |
| M305T503   | 305.1491061 | 503.046 | 17494465.14 |
| M305T302   | 305.1480529 | 302.191 | 8800684.232 |
| M305T361   | 305.1550238 | 360.794 | 1894371.735 |
| M305T459   | 305.1592179 | 458.985 | 4998622.216 |
| M305T411   | 305.157922  | 410.542 | 4248751.51  |
| M305T294_2 | 305.1690328 | 293.896 | 6371428.73  |
| M305T406   | 305.1725149 | 406.289 | 8539811.266 |
| M305T401   | 305.1704921 | 400.59  | 7275378.826 |
| M305T674   | 305.1730055 | 674.402 | 3857854.292 |
| M305T426   | 305.1843462 | 425.909 | 10657597.66 |
| M305T359   | 305.1971109 | 359.32  | 4626543.309 |

|            |              |          |              |
|------------|--------------|----------|--------------|
| M305T727   | 305. 2084321 | 726. 707 | 9893468. 316 |
| M305T833   | 305. 208517  | 833. 029 | 250443034    |
| M305T787   | 305. 2097263 | 786. 569 | 12501152. 52 |
| M305T747   | 305. 2463511 | 746. 977 | 6424365. 725 |
| M306T802   | 305. 6006806 | 801. 685 | 5667348. 451 |
| M306T504   | 305. 6514637 | 504. 466 | 8576830. 465 |
| M306T545   | 306. 0473054 | 545. 203 | 13860965. 22 |
| M306T89    | 306. 0574277 | 88. 6838 | 9161516. 572 |
| M306T448   | 306. 0580679 | 447. 531 | 4756658. 136 |
| M306T161   | 306. 0808233 | 161. 494 | 1515023. 965 |
| M306T469_1 | 306. 0960423 | 469. 252 | 2903854. 352 |
| M306T438_1 | 306. 1103686 | 437. 571 | 5882994. 88  |
| M306T456   | 306. 1168771 | 456. 126 | 14731386. 38 |
| M306T119   | 306. 1170107 | 119. 433 | 36453985. 94 |
| M306T163   | 306. 1169384 | 162. 728 | 33706443. 83 |
| M306T294   | 306. 1170247 | 293. 896 | 16842523. 12 |
| M306T190   | 306. 116897  | 189. 571 | 20866727. 26 |
| M306T310   | 306. 1160579 | 310. 075 | 10878613. 1  |
| M306T181   | 306. 1169848 | 181. 154 | 14551916. 48 |
| M306T97    | 306. 1162633 | 96. 7698 | 178164540. 7 |
| M306T469_2 | 306. 1169291 | 469. 252 | 14250999. 53 |
| M306T449   | 306. 1169944 | 448. 978 | 6171522. 975 |
| M306T143_1 | 306. 1171095 | 142. 85  | 38558732. 61 |
| M306T339   | 306. 1170625 | 339. 085 | 12825487. 87 |
| M306T173   | 306. 1170664 | 173. 407 | 13754482. 52 |
| M306T87    | 306. 1171314 | 86. 6643 | 55472260. 72 |
| M306T104   | 306. 1170235 | 104. 493 | 140850950. 9 |
| M306T364   | 306. 1185962 | 363. 58  | 27943537. 2  |
| M306T595   | 306. 1173607 | 595. 066 | 3981397. 883 |
| M306T521   | 306. 1254556 | 520. 739 | 805394. 0976 |
| M306T348   | 306. 1321826 | 348. 488 | 29846636. 13 |
| M306T122   | 306. 1373072 | 122. 007 | 21049485     |
| M306T574   | 306. 1321437 | 574. 363 | 5068823. 121 |
| M306T106   | 306. 1372125 | 105. 503 | 115168194. 5 |
| M306T388   | 306. 1315778 | 387. 763 | 55896887. 63 |
| M306T374   | 306. 1320273 | 373. 532 | 41848821. 32 |
| M306T361   | 306. 1320133 | 360. 794 | 17662521. 28 |
| M306T318   | 306. 1320003 | 318. 497 | 42813587. 46 |
| M306T143_2 | 306. 1407323 | 142. 85  | 88120053. 24 |
| M306T353   | 306. 1494413 | 352. 65  | 6901266. 289 |
| M306T102   | 306. 151845  | 102. 247 | 92999767. 49 |
| M306T438_2 | 306. 1465211 | 437. 571 | 2718650. 366 |
| M306T314   | 306. 1542045 | 314. 259 | 8253217. 959 |
| M306T271   | 306. 1537357 | 270. 983 | 15310506. 77 |
| M306T143_3 | 306. 1528104 | 142. 85  | 15581314. 42 |
| M306T458   | 306. 153782  | 457. 576 | 13317818. 89 |
| M306T403   | 306. 1541708 | 403. 447 | 1292114. 221 |
| M306T245   | 306. 1621478 | 245. 199 | 9617062. 714 |
| M306T368   | 306. 1617401 | 367. 949 | 17963470. 5  |
| M306T107   | 306. 1650148 | 106. 513 | 28623661. 51 |
| M306T425   | 306. 1917263 | 424. 572 | 2596976. 707 |
| M306T480   | 306. 19051   | 479. 527 | 5065535. 563 |
| M306T475   | 306. 2059121 | 475. 007 | 1278436. 122 |
| M306T833   | 306. 2057433 | 833. 029 | 4441827. 95  |

|            |              |          |              |
|------------|--------------|----------|--------------|
| M307T393_1 | 306. 9146998 | 392. 715 | 1730514. 871 |
| M307T121   | 306. 9962996 | 120. 525 | 52721381. 27 |
| M307T111   | 306. 9962678 | 111. 382 | 17475002. 65 |
| M307T151   | 307. 0307941 | 151. 016 | 36505219. 27 |
| M307T308_1 | 307. 0652226 | 307. 735 | 4235573. 494 |
| M307T212   | 307. 0819409 | 212. 448 | 18103129. 1  |
| M307T393_2 | 307. 0914972 | 392. 715 | 1892250134   |
| M307T533   | 307. 0933436 | 532. 526 | 724458. 2235 |
| M307T119   | 307. 1009852 | 119. 433 | 56399425. 24 |
| M307T308_2 | 307. 1008402 | 307. 735 | 47542914. 54 |
| M307T328   | 307. 101006  | 328. 106 | 18989134. 92 |
| M307T158   | 307. 1008927 | 157. 773 | 80902027. 03 |
| M307T223   | 307. 0988049 | 223. 474 | 26301663. 57 |
| M307T190   | 307. 1008841 | 189. 571 | 55712083. 83 |
| M307T293   | 307. 1009843 | 292. 623 | 141864136. 9 |
| M307T180   | 307. 100979  | 179. 75  | 47011360. 3  |
| M307T649   | 307. 1021121 | 649. 338 | 10249200. 08 |
| M307T106_1 | 307. 1009351 | 105. 503 | 312312536. 4 |
| M307T199   | 307. 1009726 | 199. 43  | 35241364. 05 |
| M307T143   | 307. 1010492 | 142. 85  | 69357368. 52 |
| M307T258   | 307. 1009765 | 258. 489 | 60235078. 76 |
| M307T210   | 307. 098862  | 210. 186 | 34926077. 91 |
| M307T171   | 307. 1009162 | 170. 665 | 36784215. 49 |
| M307T239   | 307. 0989609 | 238. 605 | 29591227. 59 |
| M307T427   | 307. 0990044 | 427. 362 | 7875771. 282 |
| M307T93    | 307. 1009864 | 92. 7272 | 70228367. 9  |
| M307T521   | 307. 1030551 | 520. 739 | 11011144. 72 |
| M307T456   | 307. 1201018 | 456. 126 | 1895094. 459 |
| M307T530   | 307. 115942  | 529. 713 | 2775267. 164 |
| M307T97    | 307. 1218594 | 96. 7698 | 22713092. 82 |
| M307T339   | 307. 1234702 | 339. 085 | 6075263. 536 |
| M307T317   | 307. 1303043 | 317. 199 | 5316504. 672 |
| M307T420_1 | 307. 1407982 | 420. 274 | 3350023. 075 |
| M307T106_2 | 307. 1379666 | 105. 503 | 9935851. 191 |
| M307T388   | 307. 1365332 | 387. 763 | 10493037. 32 |
| M307T374   | 307. 1366772 | 373. 532 | 8033090. 649 |
| M307T90    | 307. 1482119 | 89. 6999 | 40241280. 67 |
| M307T218   | 307. 1482765 | 217. 866 | 3917093. 317 |
| M307T673   | 307. 1505711 | 672. 956 | 1937896. 507 |
| M307T368   | 307. 1693629 | 367. 949 | 3927785. 532 |
| M307T432   | 307. 1761837 | 431. 64  | 3723295. 121 |
| M307T420_2 | 307. 1761693 | 420. 274 | 6097580. 223 |
| M307T442   | 307. 1759545 | 442. 005 | 10212555. 31 |
| M307T468   | 307. 183845  | 467. 706 | 2801455. 109 |
| M307T776   | 307. 189137  | 776. 194 | 16878802. 55 |
| M307T809_1 | 307. 1991754 | 808. 678 | 1392794. 211 |
| M307T617   | 307. 210766  | 617. 133 | 2429543. 483 |
| M307T809_2 | 307. 2240733 | 808. 678 | 10886217. 74 |
| M307T833   | 307. 2211837 | 833. 029 | 7406587. 763 |
| M307T824   | 307. 2264014 | 824. 311 | 8784189. 884 |
| M308T484   | 307. 6772778 | 483. 973 | 7904051. 47  |
| M308T211_1 | 307. 9806806 | 211. 288 | 4578192. 091 |
| M308T121   | 307. 9986719 | 120. 525 | 4390597. 917 |
| M308T164   | 308. 0191689 | 163. 846 | 542828822. 4 |

|            |             |         |             |
|------------|-------------|---------|-------------|
| M308T461   | 308.0704648 | 460.537 | 8066150.055 |
| M308T443   | 308.0705392 | 443.256 | 879703691.9 |
| M308T393_1 | 308.0935727 | 392.715 | 205007369.5 |
| M308T113   | 308.0894894 | 112.781 | 3169519.362 |
| M308T744   | 308.0944835 | 744.182 | 8445763.257 |
| M308T197   | 308.0980024 | 196.644 | 6434618.127 |
| M308T254   | 308.0961082 | 254.446 | 5369797.91  |
| M308T212   | 308.0977891 | 212.448 | 7421365.644 |
| M308T308   | 308.1037983 | 307.735 | 3498003.308 |
| M308T159   | 308.1057562 | 159.017 | 7915026.974 |
| M308T293   | 308.1037855 | 292.623 | 13211808.43 |
| M308T181   | 308.1051062 | 181.154 | 4602205.511 |
| M308T521   | 308.1050967 | 520.739 | 820501.4408 |
| M308T104_1 | 308.1036672 | 104.493 | 37766066.33 |
| M308T413_1 | 308.1115054 | 413.295 | 5150174.293 |
| M308T339   | 308.1126678 | 339.085 | 6584981.43  |
| M308T324   | 308.1127457 | 323.984 | 4864905.868 |
| M308T92    | 308.1320001 | 91.7174 | 129988255.8 |
| M308T97_1  | 308.1281963 | 96.7698 | 103506660.1 |
| M308T87    | 308.1319919 | 86.6643 | 102588332.1 |
| M308T413_2 | 308.1229844 | 413.295 | 6650220.477 |
| M308T160   | 308.1320391 | 160.369 | 7166404.95  |
| M308T143   | 308.1280381 | 142.85  | 9365664.871 |
| M308T342   | 308.1231105 | 341.802 | 8009334.361 |
| M308T198   | 308.1261238 | 198.072 | 1835412.091 |
| M308T104_2 | 308.13197   | 104.493 | 58745141.42 |
| M308T211_2 | 308.1260476 | 211.288 | 1048454.608 |
| M308T318   | 308.1336634 | 318.497 | 5255125.947 |
| M308T329   | 308.1474055 | 329.481 | 4890013.588 |
| M308T419   | 308.1474599 | 418.97  | 6607899.811 |
| M308T345   | 308.1475562 | 344.555 | 8373944.616 |
| M308T97_2  | 308.1435885 | 96.7698 | 12695465.15 |
| M308T401   | 308.1474501 | 400.59  | 12421141.71 |
| M308T482   | 308.1486928 | 482.436 | 2965824.196 |
| M308T426   | 308.1601516 | 425.909 | 2591478.081 |
| M308T411   | 308.1679228 | 410.542 | 4601656.29  |
| M308T393_2 | 308.1692057 | 392.715 | 62635639.99 |
| M308T350   | 308.1684826 | 349.911 | 9629670.67  |
| M308T471   | 308.184505  | 470.602 | 14244626.56 |
| M308T811   | 308.2217631 | 811.413 | 16932767.42 |
| M308T68    | 308.2159237 | 68.0903 | 1221485.263 |
| M308T838   | 308.2217937 | 837.524 | 8946131.595 |
| M308T629   | 308.2198594 | 629.015 | 123389358   |
| M309T164_1 | 308.5196307 | 163.846 | 97972527.47 |
| M309T114   | 308.9376284 | 114.15  | 2097522.581 |
| M309T163   | 309.021474  | 162.728 | 31929539.11 |
| M309T264   | 309.0446716 | 264.079 | 10350813.65 |
| M309T164_2 | 309.0805707 | 163.846 | 13052276.48 |
| M309T393_1 | 309.0819646 | 392.715 | 177608352.6 |
| M309T143   | 309.0806835 | 142.85  | 7014915.027 |
| M309T156   | 309.0806212 | 156.393 | 16054260.84 |
| M309T652   | 309.0843691 | 651.956 | 215915396.3 |
| M309T497   | 309.0949101 | 497.214 | 5465216.505 |
| M309T412   | 309.0953529 | 411.838 | 4495700.168 |

|            |             |         |             |
|------------|-------------|---------|-------------|
| M309T393_2 | 309.0945825 | 392.715 | 17218738.28 |
| M309T190   | 309.1063797 | 189.571 | 2311940.29  |
| M309T104   | 309.1075545 | 104.493 | 4130327.59  |
| M309T465   | 309.1077243 | 464.668 | 4151453.707 |
| M309T490_1 | 309.1077527 | 489.826 | 2347172.126 |
| M309T558   | 309.1167137 | 557.967 | 184007354.5 |
| M309T682   | 309.1153882 | 681.885 | 35241032.04 |
| M309T418   | 309.1218175 | 417.676 | 2540119.363 |
| M309T336   | 309.1167256 | 336.344 | 4075481.664 |
| M309T761   | 309.1167562 | 760.916 | 2624668.086 |
| M309T101   | 309.1282768 | 101.161 | 50004492.11 |
| M309T92    | 309.1282676 | 91.7174 | 193750358.6 |
| M309T784   | 309.1295244 | 783.78  | 256031428   |
| M309T803   | 309.129576  | 802.88  | 16282804.22 |
| M309T436   | 309.1433935 | 436.069 | 4300766.081 |
| M309T287   | 309.1426761 | 287.148 | 9154638.381 |
| M309T304   | 309.1656509 | 303.513 | 28471604.06 |
| M309T393_3 | 309.1736118 | 392.715 | 7399536.566 |
| M309T478   | 309.1797082 | 477.989 | 3160924.102 |
| M309T490_2 | 309.179865  | 489.826 | 2877475.159 |
| M309T809   | 309.2043983 | 808.678 | 31680425.9  |
| M309T743   | 309.2008297 | 742.68  | 13644561.88 |
| M309T832   | 309.2028421 | 831.709 | 15838410.7  |
| M309T768   | 309.2007632 | 768.166 | 13622723.27 |
| M309T756   | 309.2043522 | 755.537 | 18705971.15 |
| M309T716   | 309.2042658 | 716.403 | 24885628.54 |
| M309T734   | 309.2010907 | 734.269 | 12466047.9  |
| M309T776   | 309.2008668 | 776.194 | 11994176.81 |
| M309T629   | 309.2236383 | 629.015 | 22661954.22 |
| M309T563   | 309.2559958 | 563.297 | 13907426.94 |
| M310T175   | 309.5566572 | 174.865 | 11540237.4  |
| M310T74    | 309.9728864 | 73.8324 | 90625519.9  |
| M310T668   | 310.0679189 | 667.609 | 47196670.35 |
| M310T744   | 310.0698723 | 744.182 | 6445649.859 |
| M310T159   | 310.0833494 | 159.017 | 951562.579  |
| M310T393   | 310.0862016 | 392.715 | 14953605.24 |
| M310T334_1 | 310.089327  | 333.715 | 1998415.059 |
| M310T106   | 310.1125216 | 105.503 | 68424477.32 |
| M310T95    | 310.1106001 | 94.7467 | 885127197.4 |
| M310T178   | 310.1114821 | 178.408 | 9662612.021 |
| M310T558   | 310.1190465 | 557.967 | 19631662.21 |
| M310T682   | 310.11918   | 681.885 | 4128206.434 |
| M310T345_1 | 310.127014  | 344.555 | 90155445.95 |
| M310T94    | 310.1223404 | 93.7378 | 25085195.96 |
| M310T466   | 310.1268498 | 466.162 | 290076155.1 |
| M310T443   | 310.1263122 | 443.256 | 26820962.74 |
| M310T402   | 310.1269467 | 401.963 | 8474294.831 |
| M310T305   | 310.1272015 | 304.777 | 18380736.36 |
| M310T324   | 310.1274453 | 323.984 | 9078720.371 |
| M310T527   | 310.1281824 | 526.676 | 5243063.933 |
| M310T345_2 | 310.1385863 | 344.555 | 16730649.28 |
| M310T334_2 | 310.1385371 | 333.715 | 13044538.76 |
| M310T295   | 310.1387104 | 295.356 | 5455621.237 |
| M310T316   | 310.1384462 | 315.701 | 10880217.08 |



|          |              |          |              |
|----------|--------------|----------|--------------|
| M310T406 | 310. 1398357 | 406. 289 | 2810225. 165 |
| M310T158 | 310. 1473942 | 157. 773 | 12248859. 54 |
| M310T190 | 310. 1462887 | 189. 571 | 16713723. 11 |
| M310T97  | 310. 1441461 | 96. 7698 | 91654046. 61 |
| M310T145 | 310. 1493261 | 145. 382 | 17628162. 69 |
| M310T171 | 310. 1476419 | 170. 665 | 4474614. 542 |
| M310T123 | 310. 1475688 | 123. 262 | 13547045. 33 |
| M310T374 | 310. 1510357 | 373. 532 | 2299511. 905 |
| M310T99  | 310. 1592769 | 98. 9918 | 8967352. 953 |
| M310T451 | 310. 164047  | 450. 503 | 6475841. 396 |
| M310T616 | 310. 1631444 | 615. 594 | 2374111. 686 |
| M310T824 | 310. 16235   | 824. 311 | 17192645. 64 |
| M310T413 | 310. 1654675 | 413. 295 | 2918564. 434 |
| M310T80  | 310. 1664204 | 79. 643  | 5304987. 476 |
| M310T320 | 310. 1865397 | 319. 758 | 6457454. 693 |
| M310T304 | 310. 1851589 | 303. 513 | 4975334. 512 |
| M310T535 | 310. 2006535 | 535. 329 | 11891800. 91 |
| M310T716 | 310. 2071723 | 716. 403 | 3640918. 315 |
| M310T807 | 310. 2116656 | 807. 232 | 4293508. 278 |
| M310T423 | 310. 2223978 | 423. 199 | 2107742. 485 |
| M310T617 | 310. 2367836 | 617. 133 | 4460046. 933 |
| M310T631 | 310. 2354543 | 630. 507 | 9458065. 191 |
| M310T765 | 310. 2696566 | 765. 406 | 8068890. 973 |
| M311T821 | 310. 6623117 | 821. 334 | 4298849. 93  |
| M311T252 | 310. 9949348 | 251. 555 | 7114804. 17  |
| M311T531 | 311. 0174032 | 531. 127 | 1934960. 182 |
| M311T127 | 311. 0311941 | 126. 785 | 850509. 985  |
| M311T474 | 311. 0521159 | 473. 597 | 6284276. 957 |
| M311T668 | 311. 073046  | 667. 609 | 8669794. 827 |
| M311T346 | 311. 0730049 | 345. 848 | 56450485. 95 |
| M311T171 | 311. 0742356 | 170. 665 | 18646646. 94 |
| M311T393 | 311. 0802115 | 392. 715 | 2497482. 726 |
| M311T652 | 311. 0916368 | 651. 956 | 3474447. 05  |
| M311T95  | 311. 1145016 | 94. 7467 | 102048996. 6 |
| M311T351 | 311. 1204699 | 351. 348 | 9586806. 904 |
| M311T232 | 311. 1223676 | 231. 773 | 13759010. 89 |
| M311T195 | 311. 122449  | 195. 23  | 9572332. 558 |
| M311T284 | 311. 1225743 | 284. 377 | 6530983. 167 |
| M311T345 | 311. 1315333 | 344. 555 | 17226937. 76 |
| M311T32  | 311. 1325971 | 32. 4171 | 16269342. 05 |
| M311T530 | 311. 1276614 | 529. 713 | 2083572. 12  |
| M311T466 | 311. 1289776 | 466. 162 | 41547671. 89 |
| M311T784 | 311. 1376051 | 783. 78  | 3109360. 815 |
| M311T551 | 311. 1459192 | 550. 919 | 2528853. 305 |
| M311T503 | 311. 1484396 | 503. 046 | 3773098. 113 |
| M311T823 | 311. 1613584 | 822. 881 | 14695053. 23 |
| M311T372 | 311. 1760029 | 372. 152 | 15323728. 38 |
| M311T399 | 311. 1711142 | 399. 046 | 12946648. 88 |
| M311T358 | 311. 1703077 | 357. 958 | 6849626. 235 |
| M311T324 | 311. 1704719 | 323. 984 | 15540973. 98 |
| M311T584 | 311. 1835413 | 584. 417 | 13700873. 34 |
| M311T449 | 311. 1822888 | 448. 978 | 1433086. 006 |
| M311T754 | 311. 2194404 | 753. 987 | 24190822. 04 |
| M311T739 | 311. 2199678 | 738. 697 | 22781130. 1  |

|            |              |          |              |
|------------|--------------|----------|--------------|
| M311T765   | 311. 2194423 | 765. 406 | 18346543. 9  |
| M311T838   | 311. 2194054 | 837. 524 | 99378827. 46 |
| M311T787   | 311. 2193837 | 786. 569 | 74805784. 33 |
| M311T802   | 311. 2194543 | 801. 685 | 29295102. 44 |
| M311T775   | 311. 2540151 | 774. 919 | 4113476. 81  |
| M311T563   | 311. 2723241 | 563. 297 | 12445154. 07 |
| M311T649   | 311. 2722021 | 649. 338 | 3884299. 501 |
| M312T32_1  | 311. 636201  | 32. 4171 | 44015868. 6  |
| M312T119   | 311. 9685836 | 119. 433 | 19223562. 94 |
| M312T74    | 311. 9712195 | 73. 8324 | 38235066. 53 |
| M312T439   | 312. 0861144 | 439. 021 | 5119776. 977 |
| M312T169   | 312. 1081833 | 169. 221 | 362384800. 1 |
| M312T192_1 | 312. 1083487 | 192. 437 | 19016123. 7  |
| M312T534   | 312. 1208758 | 533. 958 | 16632088. 19 |
| M312T95    | 312. 1163535 | 94. 7467 | 19201405. 58 |
| M312T87    | 312. 1266764 | 86. 6643 | 81602244. 11 |
| M312T547   | 312. 1258889 | 546. 651 | 12137366. 45 |
| M312T357   | 312. 1268812 | 356. 74  | 12775834. 39 |
| M312T218   | 312. 1281272 | 217. 866 | 21006095. 95 |
| M312T201   | 312. 1279257 | 200. 766 | 33268827. 75 |
| M312T311   | 312. 142466  | 311. 445 | 16073622. 45 |
| M312T328   | 312. 1425172 | 328. 106 | 16116314. 76 |
| M312T436   | 312. 1437721 | 436. 069 | 5244198. 595 |
| M312T293   | 312. 1423996 | 292. 623 | 7724725. 547 |
| M312T533   | 312. 1414796 | 532. 526 | 2212223. 163 |
| M312T32_2  | 312. 1376962 | 32. 4171 | 14010482. 92 |
| M312T480   | 312. 1515207 | 479. 527 | 8416864. 925 |
| M312T110   | 312. 1633628 | 110. 047 | 7769978. 308 |
| M312T192_2 | 312. 1646535 | 192. 437 | 2886218. 779 |
| M312T245   | 312. 1633404 | 245. 199 | 4499058. 848 |
| M312T321   | 312. 164582  | 321. 198 | 3704322. 975 |
| M312T491   | 312. 1692615 | 491. 373 | 632419. 277  |
| M312T419   | 312. 1777319 | 418. 97  | 11220575. 15 |
| M312T351   | 312. 1994977 | 351. 348 | 9027840. 853 |
| M312T359   | 312. 199579  | 359. 32  | 28613393. 86 |
| M312T509   | 312. 2156903 | 508. 883 | 19605885. 86 |
| M312T787   | 312. 2226218 | 786. 569 | 14312226. 54 |
| M313T582   | 312. 6083677 | 581. 625 | 904173. 1766 |
| M313T798   | 312. 6174253 | 797. 773 | 6828630. 128 |
| M313T32_1  | 312. 6315657 | 32. 4171 | 18783170. 9  |
| M313T39    | 312. 8982852 | 39. 4128 | 994380. 5626 |
| M313T121   | 312. 9651058 | 120. 525 | 34869431. 96 |
| M313T110   | 312. 9650202 | 110. 047 | 10197218. 29 |
| M313T321   | 313. 0477988 | 321. 198 | 12403736. 68 |
| M313T283   | 313. 0540497 | 282. 886 | 3373000. 717 |
| M313T533   | 313. 0780104 | 532. 526 | 3702838. 508 |
| M313T468_1 | 313. 0898682 | 467. 706 | 2869909. 387 |
| M313T320   | 313. 0885363 | 319. 758 | 3591837. 192 |
| M313T393   | 313. 1044458 | 392. 715 | 35851041. 6  |
| M313T301   | 313. 112192  | 300. 782 | 18077882. 04 |
| M313T472   | 313. 1188887 | 472. 132 | 2291873. 941 |
| M313T168   | 313. 1138367 | 167. 804 | 40905827. 59 |
| M313T156   | 313. 1134743 | 156. 393 | 5720277. 109 |
| M313T484   | 313. 1187719 | 483. 973 | 2662780. 597 |

|            |              |          |              |
|------------|--------------|----------|--------------|
| M313T88    | 313. 1306529 | 87. 6739 | 19915777. 74 |
| M313T32_2  | 313. 1332578 | 32. 4171 | 5759093. 885 |
| M313T201   | 313. 1306613 | 200. 766 | 2846220. 331 |
| M313T219   | 313. 1305734 | 219. 233 | 1565763. 18  |
| M313T106   | 313. 1385141 | 105. 503 | 14387210. 34 |
| M313T324   | 313. 1374392 | 323. 984 | 6889264. 662 |
| M313T309   | 313. 1490021 | 308. 967 | 6141734. 375 |
| M313T331   | 313. 1490478 | 330. 809 | 16826782. 23 |
| M313T662   | 313. 1634341 | 661. 979 | 4437490. 64  |
| M313T525   | 313. 1607559 | 525. 132 | 5980134. 84  |
| M313T316   | 313. 1737201 | 315. 701 | 4031807. 728 |
| M313T419   | 313. 1838334 | 418. 97  | 3450552. 278 |
| M313T557   | 313. 1988463 | 556. 816 | 13199654. 3  |
| M313T788   | 313. 1990435 | 787. 856 | 1949573. 595 |
| M313T566   | 313. 1990305 | 565. 79  | 9524528. 761 |
| M313T481   | 313. 1990175 | 481. 042 | 1428809. 843 |
| M313T468_2 | 313. 1990867 | 467. 706 | 12252942. 82 |
| M313T509   | 313. 201485  | 508. 883 | 5086673. 911 |
| M313T791   | 313. 2353872 | 790. 802 | 56191857. 24 |
| M313T705   | 313. 2356879 | 704. 715 | 46930110. 85 |
| M313T754   | 313. 2352453 | 753. 987 | 110601086. 3 |
| M313T838   | 313. 2357682 | 837. 524 | 43241406. 76 |
| M313T776   | 313. 2355269 | 776. 194 | 48530982. 55 |
| M313T562   | 313. 2516681 | 561. 955 | 33579828. 19 |
| M314T803   | 313. 5854872 | 802. 88  | 5602457. 754 |
| M314T32_1  | 313. 6283702 | 32. 4171 | 5472266. 029 |
| M314T167   | 313. 9969404 | 166. 613 | 9910683. 771 |
| M314T205   | 314. 0800826 | 204. 747 | 4430041. 78  |
| M314T169   | 314. 0826336 | 169. 221 | 195319310    |
| M314T195_1 | 314. 0802973 | 195. 23  | 6605552. 843 |
| M314T148   | 314. 0840721 | 148. 117 | 28197439. 62 |
| M314T275   | 314. 0905765 | 274. 968 | 237537882. 3 |
| M314T535   | 314. 1025339 | 535. 329 | 1130072. 956 |
| M314T494   | 314. 0999402 | 494. 289 | 1425749. 226 |
| M314T393   | 314. 1091377 | 392. 715 | 4981401. 011 |
| M314T121   | 314. 1064573 | 120. 525 | 63813288. 43 |
| M314T113   | 314. 1064021 | 112. 781 | 46514327. 09 |
| M314T136   | 314. 1064643 | 135. 971 | 49502173. 38 |
| M314T104   | 314. 1063821 | 104. 493 | 13941178. 76 |
| M314T462   | 314. 1103535 | 461. 845 | 10007750. 08 |
| M314T161   | 314. 122489  | 161. 494 | 22897503. 15 |
| M314T144   | 314. 1210594 | 143. 959 | 13774086. 22 |
| M314T293_1 | 314. 122455  | 292. 623 | 20087134. 99 |
| M314T106   | 314. 1222983 | 105. 503 | 24980027. 27 |
| M314T210   | 314. 1222763 | 210. 186 | 89849297. 68 |
| M314T198   | 314. 1223188 | 198. 072 | 29875527. 09 |
| M314T32_2  | 314. 1297904 | 32. 4171 | 1977447. 866 |
| M314T354   | 314. 131441  | 353. 978 | 3447290. 732 |
| M314T616   | 314. 1367502 | 615. 594 | 107730630. 6 |
| M314T425   | 314. 1379379 | 424. 572 | 8793390. 588 |
| M314T328   | 314. 1407935 | 328. 106 | 2039949. 304 |
| M314T302   | 314. 1402696 | 302. 191 | 2461273. 61  |
| M314T218   | 314. 1435685 | 217. 866 | 1353299. 01  |
| M314T306_1 | 314. 1591813 | 306. 247 | 10546342. 81 |

|            |              |          |              |
|------------|--------------|----------|--------------|
| M314T293_2 | 314. 1589759 | 292. 623 | 12291827. 57 |
| M314T313   | 314. 1591876 | 312. 85  | 9050501. 444 |
| M314T552   | 314. 1592245 | 552. 452 | 1360058. 713 |
| M314T236   | 314. 157857  | 235. 734 | 7009163. 721 |
| M314T195_2 | 314. 1591485 | 195. 23  | 6961181. 851 |
| M314T432   | 314. 1711639 | 431. 64  | 411941623. 8 |
| M314T314   | 314. 180307  | 314. 259 | 3390790. 638 |
| M314T306_2 | 314. 1814715 | 306. 247 | 6826484. 336 |
| M314T295   | 314. 1803685 | 295. 356 | 1950159. 431 |
| M314T461   | 314. 1952107 | 460. 537 | 3645338. 035 |
| M314T584   | 314. 1948207 | 584. 417 | 2475246. 457 |
| M314T521_1 | 314. 1950179 | 520. 739 | 5739721. 973 |
| M314T388   | 314. 2053969 | 387. 763 | 10364847. 99 |
| M314T555   | 314. 2317459 | 555. 358 | 2281907. 039 |
| M314T642   | 314. 2304868 | 642. 211 | 8021976. 339 |
| M314T521_2 | 314. 2305196 | 520. 739 | 8137167. 519 |
| M314T705   | 314. 2383304 | 704. 715 | 7930422. 721 |
| M314T838   | 314. 238478  | 837. 524 | 7631021. 925 |
| M314T753   | 314. 2397661 | 752. 541 | 19925148. 54 |
| M314T776   | 314. 2412313 | 776. 194 | 7078088. 343 |
| M314T698   | 314. 2674193 | 697. 952 | 21171398. 55 |
| M314T807   | 314. 3031792 | 807. 232 | 31626965. 08 |
| M315T802   | 314. 5860518 | 801. 685 | 12075088. 96 |
| M315T429   | 314. 6865917 | 428. 735 | 1084507. 942 |
| M315T355   | 314. 8231505 | 355. 41  | 1136221. 921 |
| M315T252   | 314. 9682664 | 251. 555 | 3264273. 83  |
| M315T127   | 315. 0019013 | 126. 785 | 5906505. 748 |
| M315T147   | 315. 0164294 | 146. 742 | 34806102. 5  |
| M315T171   | 315. 0863492 | 170. 665 | 22249478. 37 |
| M315T274   | 315. 0938538 | 273. 531 | 25969097. 79 |
| M315T118   | 315. 1109263 | 118. 116 | 6998350. 947 |
| M315T161   | 315. 1173022 | 161. 494 | 3084340. 358 |
| M315T144   | 315. 1173533 | 143. 959 | 6928985. 288 |
| M315T305   | 315. 11725   | 304. 777 | 5282524. 813 |
| M315T101   | 315. 126525  | 101. 161 | 4901209. 857 |
| M315T210   | 315. 1263363 | 210. 186 | 11881694. 84 |
| M315T275   | 315. 1265052 | 274. 968 | 8401263. 154 |
| M315T198   | 315. 126574  | 198. 072 | 4333752. 666 |
| M315T261   | 315. 1265891 | 261. 177 | 11064317. 31 |
| M315T436   | 315. 1307418 | 436. 069 | 29988763. 57 |
| M315T506   | 315. 1332502 | 505. 855 | 5876102. 021 |
| M315T425   | 315. 1430898 | 424. 572 | 1678834. 585 |
| M315T306   | 315. 1525498 | 306. 247 | 4735895. 487 |
| M315T462   | 315. 1543451 | 461. 845 | 7128680. 517 |
| M315T165   | 315. 1544849 | 165. 217 | 3855724. 425 |
| M315T143   | 315. 1531462 | 142. 85  | 7519405. 753 |
| M315T95    | 315. 1527751 | 94. 7467 | 21250453. 48 |
| M315T104   | 315. 1529608 | 104. 493 | 42582699. 7  |
| M315T308   | 315. 1634058 | 307. 735 | 7280333. 355 |
| M315T395   | 315. 1649932 | 395. 264 | 7914896. 116 |
| M315T655   | 315. 1665131 | 654. 542 | 1264084. 912 |
| M315T284   | 315. 1650693 | 284. 377 | 13363669. 5  |
| M315T777   | 315. 1681212 | 777. 245 | 5869551. 157 |
| M315T432   | 315. 1758595 | 431. 64  | 93509479. 31 |

|            |              |          |              |
|------------|--------------|----------|--------------|
| M315T490   | 315. 1758788 | 489. 826 | 9219187. 045 |
| M315T381   | 315. 1916899 | 380. 63  | 3523515. 355 |
| M315T832   | 315. 1929924 | 831. 709 | 13219722. 26 |
| M315T811   | 315. 2513957 | 811. 413 | 79013697. 29 |
| M315T800   | 315. 2513739 | 800. 484 | 11649187. 97 |
| M315T649   | 315. 2660725 | 649. 338 | 9961351. 479 |
| M315T702   | 315. 2674505 | 702. 055 | 10828582. 68 |
| M315T562   | 315. 2659377 | 561. 955 | 32198830. 73 |
| M316T803   | 315. 5845575 | 802. 88  | 4457036. 549 |
| M316T126   | 316. 0105573 | 125. 598 | 2235093. 468 |
| M316T398   | 316. 0104673 | 397. 878 | 949227. 6136 |
| M316T211   | 316. 0332532 | 211. 288 | 2337705. 124 |
| M316T121   | 316. 0544683 | 120. 525 | 4917440. 537 |
| M316T275   | 316. 0865145 | 274. 968 | 9309302. 897 |
| M316T802   | 316. 0858701 | 801. 685 | 795341. 9275 |
| M316T100   | 316. 1126535 | 100. 146 | 2173383. 526 |
| M316T150   | 316. 1118441 | 149. 65  | 4754051. 907 |
| M316T493   | 316. 1158366 | 492. 895 | 2591221. 41  |
| M316T306   | 316. 1129991 | 306. 247 | 2664092. 111 |
| M316T438   | 316. 115963  | 437. 571 | 2833648. 399 |
| M316T310   | 316. 1370766 | 310. 075 | 17797304. 52 |
| M316T291   | 316. 1373345 | 291. 307 | 22816456. 93 |
| M316T143   | 316. 1365219 | 142. 85  | 9391224. 447 |
| M316T218   | 316. 1371879 | 217. 866 | 17490029. 85 |
| M316T104   | 316. 1371575 | 104. 493 | 82286281. 92 |
| M316T158   | 316. 1458433 | 157. 773 | 9835524. 313 |
| M316T334   | 316. 1485252 | 333. 715 | 11768812. 79 |
| M316T144   | 316. 1571518 | 143. 959 | 2404168. 34  |
| M316T293   | 316. 1485267 | 292. 623 | 15679517. 17 |
| M316T423_1 | 316. 1527916 | 423. 199 | 2269233. 86  |
| M316T90    | 316. 1597296 | 89. 6999 | 31307236. 24 |
| M316T284   | 316. 1678573 | 284. 377 | 876456. 93   |
| M316T392   | 316. 1744052 | 391. 678 | 35373061. 7  |
| M316T185   | 316. 1796661 | 185. 398 | 3227075. 728 |
| M316T413   | 316. 1863604 | 413. 295 | 18843444. 58 |
| M316T477   | 316. 1998812 | 476. 554 | 3350671. 613 |
| M316T832   | 316. 1999167 | 831. 709 | 1508595. 621 |
| M316T442   | 316. 2068295 | 442. 005 | 63103737. 67 |
| M316T496   | 316. 2224008 | 495. 779 | 11078376. 75 |
| M316T834   | 316. 2250297 | 834. 486 | 3280129. 168 |
| M316T482   | 316. 2223683 | 482. 436 | 12072110. 91 |
| M316T423_2 | 316. 2235979 | 423. 199 | 11172206. 74 |
| M316T537   | 316. 247778  | 536. 761 | 10704030. 55 |
| M316T527   | 316. 247716  | 526. 676 | 6649191. 97  |
| M316T768   | 316. 2837725 | 768. 166 | 569151117. 8 |
| M316T785   | 316. 3184184 | 785. 136 | 843576269. 3 |
| M316T836   | 316. 3225312 | 836. 034 | 12317331. 72 |
| M316T31    | 316. 3185108 | 31. 4047 | 2292521. 012 |
| M316T823   | 316. 3224636 | 822. 881 | 107605541. 3 |
| M316T799   | 316. 3244251 | 799. 089 | 2146201409   |
| M317T37    | 316. 9128405 | 37. 1891 | 653709. 6667 |
| M317T44    | 316. 9127268 | 44. 1485 | 727971. 7043 |
| M317T382   | 317. 0696888 | 382. 125 | 7151724. 512 |
| M317T89    | 317. 0936374 | 88. 6838 | 10354550. 19 |

|            |              |          |              |
|------------|--------------|----------|--------------|
| M317T584   | 317. 1013495 | 584. 417 | 1188314. 619 |
| M317T173   | 317. 0964406 | 173. 407 | 13785795. 33 |
| M317T82    | 317. 1123355 | 82. 0569 | 14605130. 47 |
| M317T435   | 317. 121531  | 434. 589 | 1997724. 857 |
| M317T426   | 317. 1189272 | 425. 909 | 4147853. 573 |
| M317T318   | 317. 1323316 | 318. 497 | 10701362. 65 |
| M317T104_1 | 317. 1337125 | 104. 493 | 7797320. 632 |
| M317T159   | 317. 1444495 | 159. 017 | 8773954. 638 |
| M317T90    | 317. 1443759 | 89. 6999 | 9191833. 249 |
| M317T219   | 317. 1419759 | 219. 233 | 3099373. 998 |
| M317T104_2 | 317. 1443127 | 104. 493 | 21682958. 05 |
| M317T413   | 317. 1563263 | 413. 295 | 2314715. 295 |
| M317T422   | 317. 1564713 | 421. 784 | 4013740. 165 |
| M317T253   | 317. 1687406 | 253. 024 | 2656222. 996 |
| M317T468   | 317. 1699049 | 467. 706 | 1378561. 784 |
| M317T374   | 317. 1706335 | 373. 532 | 12584854. 6  |
| M317T311   | 317. 180504  | 311. 445 | 8469910. 608 |
| M317T392   | 317. 1805368 | 391. 678 | 13271274. 53 |
| M317T813   | 317. 2300093 | 812. 862 | 12991034. 41 |
| M317T423   | 317. 2246731 | 423. 199 | 1393952. 24  |
| M317T785   | 317. 3225615 | 785. 136 | 177337843. 4 |
| M317T799   | 317. 3225873 | 799. 089 | 408782636. 5 |
| M318T374_1 | 317. 8420018 | 373. 532 | 2444914. 628 |
| M318T378   | 317. 9265708 | 377. 704 | 2624210. 997 |
| M318T504   | 318. 0673684 | 504. 466 | 1687549. 699 |
| M318T140   | 318. 0811333 | 140. 286 | 11338010. 84 |
| M318T445   | 318. 0825395 | 444. 725 | 26101300. 22 |
| M318T426   | 318. 0786429 | 425. 909 | 25667081. 26 |
| M318T228   | 318. 0997938 | 227. 633 | 1023586. 877 |
| M318T103   | 318. 1174941 | 103. 423 | 5830078. 999 |
| M318T143   | 318. 1170847 | 142. 85  | 3393143. 787 |
| M318T148   | 318. 1282707 | 148. 117 | 52237807. 96 |
| M318T119   | 318. 1282318 | 119. 433 | 32144926. 31 |
| M318T86    | 318. 1295301 | 85. 6453 | 53115725. 02 |
| M318T167   | 318. 1281949 | 166. 613 | 29078079. 21 |
| M318T298_1 | 318. 1268059 | 298. 135 | 8830654. 751 |
| M318T409_1 | 318. 1325861 | 409. 271 | 4550829. 938 |
| M318T388_1 | 318. 1325105 | 387. 763 | 8682015. 545 |
| M318T478   | 318. 1320111 | 477. 989 | 3348058. 55  |
| M318T588   | 318. 1323014 | 587. 521 | 5256944. 47  |
| M318T595   | 318. 1323575 | 595. 066 | 4157500. 553 |
| M318T104   | 318. 1281212 | 104. 493 | 79633977. 49 |
| M318T409_2 | 318. 1537058 | 409. 271 | 5747743. 265 |
| M318T106   | 318. 1537577 | 105. 503 | 13543917. 77 |
| M318T419   | 318. 1536457 | 418. 97  | 5587601. 123 |
| M318T374_2 | 318. 1538511 | 373. 532 | 2512433. 687 |
| M318T388_2 | 318. 1645425 | 387. 763 | 6349685. 056 |
| M318T343   | 318. 1662435 | 343. 226 | 8767565. 78  |
| M318T258   | 318. 1645848 | 258. 489 | 22759749. 72 |
| M318T331   | 318. 1645275 | 330. 809 | 14982059. 36 |
| M318T320   | 318. 1646678 | 319. 758 | 9916101. 138 |
| M318T298_2 | 318. 1645262 | 298. 135 | 32675404. 65 |
| M318T376   | 318. 1739055 | 376. 409 | 2991438. 819 |
| M318T494   | 318. 1862603 | 494. 289 | 2542264. 86  |

|            |              |          |              |
|------------|--------------|----------|--------------|
| M318T440   | 318. 195251  | 440. 459 | 4204939. 939 |
| M318T335   | 318. 2032075 | 334. 966 | 5592387. 082 |
| M318T342   | 318. 2032348 | 341. 802 | 5052015. 208 |
| M318T832   | 318. 2049353 | 831. 709 | 39116794. 99 |
| M318T499   | 318. 2264435 | 498. 645 | 4327785. 698 |
| M318T396   | 318. 229516  | 396. 415 | 1166156. 437 |
| M318T754   | 318. 2763158 | 753. 987 | 92487283. 68 |
| M318T783   | 318. 2991794 | 782. 558 | 234599739. 6 |
| M319T84    | 319. 015405  | 83. 5661 | 54474648. 85 |
| M319T206   | 319. 0640709 | 205. 903 | 8978190. 042 |
| M319T199   | 319. 0653411 | 199. 43  | 12408845. 38 |
| M319T144_1 | 319. 0653799 | 143. 959 | 66047047. 17 |
| M319T159   | 319. 0640501 | 159. 017 | 58157001. 24 |
| M319T181   | 319. 0673153 | 181. 154 | 32118288. 07 |
| M319T116   | 319. 0627204 | 115. 522 | 47428965. 43 |
| M319T232   | 319. 0655301 | 231. 773 | 10608205. 11 |
| M319T305   | 319. 0673106 | 304. 777 | 35337863. 68 |
| M319T445   | 319. 0832992 | 444. 725 | 3316218. 355 |
| M319T426   | 319. 0894503 | 425. 909 | 2598235. 423 |
| M319T144_2 | 319. 1005121 | 143. 959 | 8268785. 356 |
| M319T106_1 | 319. 1016323 | 105. 503 | 25827894. 96 |
| M319T124   | 319. 1018231 | 124. 487 | 5853641. 596 |
| M319T99    | 319. 1230257 | 98. 9918 | 11271056. 53 |
| M319T530   | 319. 1274472 | 529. 713 | 11712324. 45 |
| M319T384   | 319. 1275129 | 383. 536 | 4163287. 416 |
| M319T415   | 319. 1282506 | 414. 82  | 3750659. 75  |
| M319T165_1 | 319. 1319277 | 165. 217 | 2862053. 006 |
| M319T413   | 319. 1476829 | 413. 295 | 2688142. 847 |
| M319T223   | 319. 1471632 | 223. 474 | 11132272. 31 |
| M319T86_1  | 319. 1465011 | 85. 6453 | 109615383. 2 |
| M319T165_2 | 319. 1492059 | 165. 217 | 7409719. 643 |
| M319T197   | 319. 1492128 | 196. 644 | 25824892. 46 |
| M319T261   | 319. 1491303 | 261. 177 | 107033941. 3 |
| M319T106_2 | 319. 1558948 | 105. 503 | 30862169. 38 |
| M319T144_3 | 319. 1594352 | 143. 959 | 11981268. 89 |
| M319T390   | 319. 1638365 | 390. 432 | 1935932. 183 |
| M319T86_2  | 319. 1635638 | 85. 6453 | 476996559    |
| M319T455   | 319. 1642873 | 454. 739 | 2813014. 977 |
| M319T236   | 319. 158587  | 235. 734 | 27935806. 57 |
| M319T334   | 319. 1677569 | 333. 715 | 7359842. 871 |
| M319T233   | 319. 1856731 | 233. 081 | 4167480. 799 |
| M319T814   | 319. 1869113 | 814. 095 | 7685350. 576 |
| M319T777   | 319. 2086098 | 777. 245 | 2526198. 478 |
| M319T347   | 319. 2206839 | 347. 175 | 4672501. 17  |
| M319T787   | 319. 2285297 | 786. 569 | 10269066. 13 |
| M319T746   | 319. 2612833 | 745. 603 | 24141781. 58 |
| M319T756   | 319. 2613633 | 755. 537 | 64993567. 9  |
| M319T803   | 319. 262717  | 802. 88  | 2360886381   |
| M319T783   | 319. 3006377 | 782. 558 | 40812515. 56 |
| M320T577   | 319. 6173985 | 577. 366 | 946090. 3687 |
| M320T144_1 | 320. 0676927 | 143. 959 | 7209717. 012 |
| M320T158   | 320. 067695  | 157. 773 | 4674202. 291 |
| M320T144_2 | 320. 096231  | 143. 959 | 9442664. 841 |
| M320T445   | 320. 1233104 | 444. 725 | 5471393. 305 |

|            |              |          |              |
|------------|--------------|----------|--------------|
| M320T530   | 320. 1324404 | 529. 713 | 3290628. 081 |
| M320T372   | 320. 1331519 | 372. 152 | 3388035. 596 |
| M320T229   | 320. 1327788 | 229. 059 | 13224003. 65 |
| M320T102   | 320. 1328187 | 102. 247 | 25833771. 34 |
| M320T334   | 320. 1329162 | 333. 715 | 7725023. 189 |
| M320T187   | 320. 1437086 | 186. 709 | 17211131. 66 |
| M320T95    | 320. 1437105 | 94. 7467 | 82016746. 66 |
| M320T143   | 320. 1437496 | 142. 85  | 6380776. 362 |
| M320T169   | 320. 1436595 | 169. 221 | 34561152. 41 |
| M320T123   | 320. 1437104 | 123. 262 | 10805743. 41 |
| M320T132   | 320. 1437574 | 131. 949 | 10480671. 87 |
| M320T375   | 320. 1477509 | 375. 021 | 3823631. 362 |
| M320T399   | 320. 1511793 | 399. 046 | 3855147. 981 |
| M320T86_1  | 320. 1519916 | 85. 6453 | 14972571. 37 |
| M320T104   | 320. 1436882 | 104. 493 | 65877313. 24 |
| M320T261   | 320. 1519083 | 261. 177 | 14197523. 01 |
| M320T386_1 | 320. 147982  | 386. 352 | 5024691. 492 |
| M320T461   | 320. 160141  | 460. 537 | 3232096. 231 |
| M320T86_2  | 320. 1628363 | 85. 6453 | 74315321. 05 |
| M320T423   | 320. 1692335 | 423. 199 | 15882037. 46 |
| M320T234   | 320. 1627465 | 234. 447 | 1479988. 718 |
| M320T386_2 | 320. 1667858 | 386. 352 | 2580707. 014 |
| M320T318   | 320. 1733373 | 318. 497 | 6590307. 236 |
| M320T264   | 320. 1803138 | 264. 079 | 4564765. 68  |
| M320T341   | 320. 1803004 | 340. 548 | 8334571. 774 |
| M320T359   | 320. 1968029 | 359. 32  | 10206017. 59 |
| M320T803   | 320. 2645567 | 802. 88  | 519058682. 3 |
| M320T770   | 320. 2931158 | 769. 702 | 51767377. 4  |
| M320T783   | 320. 3080039 | 782. 558 | 2695734. 769 |
| M321T359   | 320. 5325711 | 359. 32  | 5846186. 486 |
| M321T38    | 320. 9492009 | 38. 3208 | 2564069. 761 |
| M321T275   | 321. 0733018 | 274. 968 | 1448521. 695 |
| M321T147   | 321. 0815262 | 146. 742 | 11316882. 03 |
| M321T286   | 321. 0801287 | 285. 9   | 2206683. 552 |
| M321T331   | 321. 0820953 | 330. 809 | 3625729. 52  |
| M321T314   | 321. 0910626 | 314. 259 | 2027237. 891 |
| M321T90    | 321. 0922728 | 89. 6999 | 24090545. 84 |
| M321T160   | 321. 0931394 | 160. 369 | 6435574. 311 |
| M321T512   | 321. 0951612 | 511. 77  | 2534032. 291 |
| M321T413   | 321. 1046748 | 413. 295 | 19373007. 19 |
| M321T616   | 321. 1196616 | 615. 594 | 26799493. 87 |
| M321T99    | 321. 127945  | 98. 9918 | 27670411. 96 |
| M321T541   | 321. 14296   | 541. 275 | 1607421. 257 |
| M321T117   | 321. 1401736 | 116. 689 | 13799070. 79 |
| M321T371   | 321. 144703  | 370. 777 | 6104143. 254 |
| M321T104   | 321. 1401019 | 104. 493 | 90861258. 63 |
| M321T95    | 321. 1470914 | 94. 7467 | 8685142. 942 |
| M321T406   | 321. 1525529 | 406. 289 | 2463573. 215 |
| M321T427   | 321. 1565417 | 427. 362 | 6493782. 486 |
| M321T294   | 321. 1646549 | 293. 896 | 1980022. 541 |
| M321T369   | 321. 1729684 | 369. 321 | 4361029. 665 |
| M321T765   | 321. 1794465 | 765. 406 | 1235529. 71  |
| M321T809   | 321. 2043119 | 808. 678 | 18570987. 3  |
| M321T233   | 321. 2005076 | 233. 081 | 1182474. 537 |



|            |              |          |              |
|------------|--------------|----------|--------------|
| M321T829_1 | 321. 2060944 | 828. 73  | 12665883. 81 |
| M321T754   | 321. 2411916 | 753. 987 | 6924556. 299 |
| M321T669   | 321. 2561243 | 668. 867 | 6867715. 374 |
| M321T562   | 321. 2564082 | 561. 955 | 27142996. 38 |
| M321T803   | 321. 268558  | 802. 88  | 57770248. 03 |
| M321T770   | 321. 295739  | 769. 702 | 9963280. 516 |
| M321T829_2 | 321. 3138565 | 828. 73  | 11854004. 16 |
| M322T121   | 321. 9604525 | 120. 525 | 63435419. 42 |
| M322T111   | 321. 9603503 | 111. 382 | 25953643. 12 |
| M322T280   | 322. 0575171 | 280. 345 | 2971070. 608 |
| M322T336   | 322. 080521  | 336. 344 | 1225159. 489 |
| M322T219   | 322. 0754644 | 219. 233 | 17462593. 85 |
| M322T236   | 322. 1050332 | 235. 734 | 1352723. 471 |
| M322T163   | 322. 1109817 | 162. 728 | 7450724. 34  |
| M322T122   | 322. 1110892 | 122. 007 | 17816628. 7  |
| M322T129   | 322. 1106487 | 129. 234 | 13386079. 67 |
| M322T106   | 322. 111199  | 105. 503 | 42937981. 93 |
| M322T143   | 322. 1112946 | 142. 85  | 14281857. 45 |
| M322T96    | 322. 111195  | 95. 7572 | 16815473. 79 |
| M322T616   | 322. 1195544 | 615. 594 | 1777398. 904 |
| M322T353_1 | 322. 1276188 | 352. 65  | 8460173. 984 |
| M322T513   | 322. 1275633 | 513. 285 | 3378271. 028 |
| M322T316   | 322. 1275924 | 315. 701 | 19560491. 53 |
| M322T343   | 322. 1277746 | 343. 226 | 5363823. 999 |
| M322T353_2 | 322. 1392641 | 352. 65  | 16371444. 53 |
| M322T411   | 322. 135855  | 410. 542 | 5084505. 338 |
| M322T279   | 322. 1400127 | 279. 039 | 2968795. 048 |
| M322T164   | 322. 1482207 | 163. 846 | 6619307. 28  |
| M322T158   | 322. 1481408 | 157. 773 | 5464068. 388 |
| M322T187   | 322. 1481849 | 186. 709 | 6128959. 627 |
| M322T142   | 322. 1481546 | 141. 825 | 11330829. 46 |
| M322T119   | 322. 1482476 | 119. 433 | 5737954. 283 |
| M322T128   | 322. 1481747 | 127. 944 | 5794423. 204 |
| M322T100   | 322. 1481632 | 100. 146 | 40078479. 44 |
| M322T777   | 322. 1480066 | 777. 245 | 23459964. 8  |
| M322T92    | 322. 1481982 | 91. 7174 | 5093273. 804 |
| M322T107   | 322. 150328  | 106. 513 | 17364738. 61 |
| M322T408   | 322. 1536674 | 407. 724 | 31357034. 67 |
| M322T384   | 322. 1633168 | 383. 536 | 9219925. 056 |
| M322T453   | 322. 1741334 | 453. 317 | 6238643. 148 |
| M322T284   | 322. 1850853 | 284. 377 | 8309894. 937 |
| M322T394   | 322. 2325638 | 393. 934 | 2167081. 78  |
| M322T807   | 322. 2730632 | 807. 232 | 4224490. 905 |
| M323T452   | 322. 6753147 | 451. 804 | 1561948. 343 |
| M323T121   | 322. 9687444 | 120. 525 | 26312825. 38 |
| M323T111   | 322. 9688467 | 111. 382 | 9695700. 151 |
| M323T741   | 323. 0274212 | 741. 302 | 1201667. 824 |
| M323T426   | 323. 0329923 | 425. 909 | 18981731. 66 |
| M323T445   | 323. 0370895 | 444. 725 | 18560325. 71 |
| M323T272   | 323. 059037  | 272. 304 | 2200475. 286 |
| M323T275   | 323. 0824321 | 274. 968 | 98926425. 36 |
| M323T321   | 323. 0824133 | 321. 198 | 129059192. 2 |
| M323T209   | 323. 089274  | 208. 905 | 2037151. 048 |
| M323T215   | 323. 0893823 | 215. 068 | 629550. 8341 |

|            |             |         |             |
|------------|-------------|---------|-------------|
| M323T101   | 323.0954739 | 101.161 | 7053886.977 |
| M323T107   | 323.0953873 | 106.513 | 6707571.605 |
| M323T144   | 323.0962377 | 143.959 | 8615912.953 |
| M323T295   | 323.0963762 | 295.356 | 5064924.907 |
| M323T413   | 323.1223532 | 413.295 | 2421208.205 |
| M323T325   | 323.1218589 | 325.35  | 6321929.404 |
| M323T478   | 323.1222514 | 477.989 | 5943051.578 |
| M323T402   | 323.1222526 | 401.963 | 2522745.945 |
| M323T362   | 323.1264168 | 362.146 | 5262775.801 |
| M323T103   | 323.1430382 | 103.423 | 28824421.65 |
| M323T99    | 323.1549878 | 98.9918 | 26876127.81 |
| M323T309   | 323.1524976 | 308.967 | 5371954.06  |
| M323T345   | 323.160546  | 344.555 | 8531915.86  |
| M323T503   | 323.159606  | 503.046 | 3111177.939 |
| M323T320   | 323.1609016 | 319.758 | 7456361.468 |
| M323T442   | 323.1706086 | 442.005 | 9612971.245 |
| M323T719   | 323.1829812 | 719.215 | 5854921.804 |
| M323T519   | 323.196758  | 519.257 | 2512289.805 |
| M323T528   | 323.1969621 | 528.185 | 3565752.274 |
| M323T833   | 323.2200372 | 833.029 | 12840210.9  |
| M323T747   | 323.2405891 | 746.977 | 1754745.594 |
| M323T562   | 323.2714465 | 561.955 | 13176738.82 |
| M324T429_1 | 323.691846  | 428.735 | 14507061.62 |
| M324T143_1 | 324.0566758 | 142.85  | 14460714.14 |
| M324T321   | 324.0847641 | 321.198 | 10922965.97 |
| M324T276   | 324.086321  | 276.414 | 9585256.421 |
| M324T310   | 324.1065008 | 310.075 | 8031148.147 |
| M324T423   | 324.1038739 | 423.199 | 5151574.804 |
| M324T533   | 324.121705  | 532.526 | 16490690.04 |
| M324T102   | 324.1272632 | 102.247 | 199045940.3 |
| M324T143_2 | 324.1272611 | 142.85  | 50862105.62 |
| M324T87    | 324.1271863 | 86.6643 | 133644550.2 |
| M324T209   | 324.1273386 | 208.905 | 21214379.93 |
| M324T518   | 324.1417866 | 517.762 | 12371481.77 |
| M324T392   | 324.1424937 | 391.678 | 18737820.47 |
| M324T535   | 324.1418967 | 535.329 | 7695846.5   |
| M324T345   | 324.1424064 | 344.555 | 33009986.95 |
| M324T334   | 324.1425641 | 333.715 | 137509788.4 |
| M324T471   | 324.1437313 | 470.602 | 9946876.729 |
| M324T409_1 | 324.1478143 | 409.271 | 10118585.12 |
| M324T436   | 324.1476786 | 436.069 | 12932550.2  |
| M324T358   | 324.1476618 | 357.958 | 22007929.64 |
| M324T448   | 324.1479321 | 447.531 | 11934938.12 |
| M324T375   | 324.1598854 | 375.021 | 4781794.288 |
| M324T409_2 | 324.1591688 | 409.271 | 7342999.699 |
| M324T294   | 324.1632566 | 293.896 | 10467562.15 |
| M324T190   | 324.1646026 | 189.571 | 4022620.199 |
| M324T252   | 324.1646098 | 251.555 | 6708591.78  |
| M324T239   | 324.1645045 | 238.605 | 9363105.136 |
| M324T357   | 324.1594108 | 356.74  | 4914350.121 |
| M324T317   | 324.1633184 | 317.199 | 10251603.49 |
| M324T429_2 | 324.1912388 | 428.735 | 3888816.83  |
| M324T639   | 324.2155709 | 639.219 | 5081971.431 |
| M324T137   | 324.2158369 | 137.373 | 11041621.68 |

|            |              |          |              |
|------------|--------------|----------|--------------|
| M324T126   | 324. 2157715 | 125. 598 | 6707314. 828 |
| M324T554   | 324. 2157048 | 553. 936 | 5213605. 732 |
| M324T754   | 324. 2158938 | 753. 987 | 3950806. 859 |
| M324T113   | 324. 2156765 | 112. 781 | 5630721. 987 |
| M324T816   | 324. 2889862 | 815. 517 | 8326417. 273 |
| M325T351   | 324. 5234328 | 351. 348 | 5685409. 665 |
| M325T375   | 324. 6620685 | 375. 021 | 1674847. 35  |
| M325T427   | 324. 6940631 | 427. 362 | 532799. 8895 |
| M325T206   | 325. 0131059 | 205. 903 | 4538176. 591 |
| M325T163   | 325. 0409038 | 162. 728 | 26276497. 13 |
| M325T123   | 325. 0423818 | 123. 262 | 23479369. 43 |
| M325T574   | 325. 0823559 | 574. 363 | 2746717. 989 |
| M325T275   | 325. 0819822 | 274. 968 | 6015322. 486 |
| M325T320   | 325. 0771378 | 319. 758 | 8772769. 932 |
| M325T491   | 325. 0895717 | 491. 373 | 4680373. 967 |
| M325T463   | 325. 0895185 | 463. 271 | 4038446. 157 |
| M325T425   | 325. 091039  | 424. 572 | 3616812. 367 |
| M325T784   | 325. 104675  | 783. 78  | 8313078. 453 |
| M325T309   | 325. 1051887 | 308. 967 | 149097182    |
| M325T158   | 325. 1104432 | 157. 773 | 1566872318   |
| M325T180   | 325. 1104826 | 179. 75  | 1125261655   |
| M325T190   | 325. 1103858 | 189. 571 | 1107111818   |
| M325T605   | 325. 1118588 | 605. 264 | 15721174. 89 |
| M325T537   | 325. 1119683 | 536. 761 | 18633069. 25 |
| M325T649_1 | 325. 1117778 | 649. 338 | 803531688. 3 |
| M325T106   | 325. 1103941 | 105. 503 | 5538734404   |
| M325T516   | 325. 1118316 | 516. 214 | 56874357. 97 |
| M325T291   | 325. 1104901 | 291. 307 | 3080113952   |
| M325T143   | 325. 1104503 | 142. 85  | 1204716623   |
| M325T562   | 325. 1117624 | 561. 955 | 47949032. 53 |
| M325T172   | 325. 1104945 | 171. 935 | 744111667. 4 |
| M325T620   | 325. 1118319 | 620. 172 | 75820211. 37 |
| M325T121   | 325. 1104391 | 120. 525 | 961960016. 3 |
| M325T673   | 325. 1064449 | 672. 956 | 54734992. 25 |
| M325T719   | 325. 1116891 | 719. 215 | 33306458. 15 |
| M325T93    | 325. 1104006 | 92. 7272 | 2441295396   |
| M325T703_1 | 325. 1117471 | 703. 35  | 125834729. 4 |
| M325T545   | 325. 1120019 | 545. 203 | 29944260. 77 |
| M325T586   | 325. 1069263 | 585. 968 | 8777827. 786 |
| M325T632   | 325. 1117008 | 631. 982 | 99949394. 48 |
| M325T209   | 325. 1104601 | 208. 905 | 1291269240   |
| M325T802   | 325. 1095018 | 801. 685 | 7840638. 837 |
| M325T234   | 325. 1104061 | 234. 447 | 467167730    |
| M325T261   | 325. 1104584 | 261. 177 | 1095774841   |
| M325T685   | 325. 1136517 | 684. 985 | 17019869. 48 |
| M325T533   | 325. 1257584 | 532. 526 | 3613648. 213 |
| M325T216   | 325. 1348368 | 216. 359 | 5584101. 2   |
| M325T456   | 325. 1381117 | 456. 126 | 10105925. 07 |
| M325T411   | 325. 138243  | 410. 542 | 7563856. 018 |
| M325T304   | 325. 1382364 | 303. 513 | 11420266. 15 |
| M325T438   | 325. 1376268 | 437. 571 | 5388166. 963 |
| M325T327   | 325. 1362224 | 326. 78  | 11456139. 98 |
| M325T372   | 325. 1479875 | 372. 152 | 6443797. 779 |
| M325T334   | 325. 1479477 | 333. 715 | 23410263. 47 |

|            |              |          |              |
|------------|--------------|----------|--------------|
| M325T359   | 325. 1493943 | 359. 32  | 11962306. 82 |
| M325T371   | 325. 1855235 | 370. 777 | 5880453. 618 |
| M325T341   | 325. 1858541 | 340. 548 | 2423893. 121 |
| M325T228   | 325. 1952606 | 227. 633 | 1249321. 891 |
| M325T761   | 325. 1989246 | 760. 916 | 3773431. 317 |
| M325T42    | 325. 2188462 | 41. 798  | 1271841. 816 |
| M325T67    | 325. 2189334 | 66. 9841 | 3314270. 374 |
| M325T649_2 | 325. 2897344 | 649. 338 | 10782640. 15 |
| M325T703_2 | 325. 2870389 | 703. 35  | 7489403. 713 |
| M325T293   | 325. 3065221 | 292. 623 | 1084586. 889 |
| M326T331   | 325. 8651979 | 330. 809 | 5225111. 5   |
| M326T314   | 326. 0474057 | 314. 259 | 965320. 6991 |
| M326T173   | 326. 0617834 | 173. 407 | 6759637. 194 |
| M326T263   | 326. 0702492 | 262. 529 | 21305686. 66 |
| M326T158   | 326. 113382  | 157. 773 | 192932722. 1 |
| M326T223   | 326. 1125762 | 223. 474 | 51694279. 88 |
| M326T190   | 326. 1133191 | 189. 571 | 139527283. 2 |
| M326T180   | 326. 1134507 | 179. 75  | 148783120. 7 |
| M326T649   | 326. 1140647 | 649. 338 | 107538659. 5 |
| M326T106   | 326. 1133886 | 105. 503 | 719103038. 6 |
| M326T291   | 326. 1133985 | 291. 307 | 397694259. 4 |
| M326T143   | 326. 1134354 | 142. 85  | 154783567. 9 |
| M326T620   | 326. 1141257 | 620. 172 | 8566097. 718 |
| M326T121   | 326. 1133716 | 120. 525 | 126851560    |
| M326T171   | 326. 113358  | 170. 665 | 92479470. 87 |
| M326T515   | 326. 1146941 | 514. 727 | 2319981. 557 |
| M326T93    | 326. 1134068 | 92. 7272 | 325741836    |
| M326T703   | 326. 1147397 | 703. 35  | 15913595. 05 |
| M326T632   | 326. 1141698 | 631. 982 | 13047333. 56 |
| M326T209   | 326. 1132467 | 208. 905 | 162570373. 3 |
| M326T234   | 326. 1130878 | 234. 447 | 49738356. 2  |
| M326T261   | 326. 1132503 | 261. 177 | 132770712. 2 |
| M326T390   | 326. 1221426 | 390. 432 | 12473355. 43 |
| M326T323   | 326. 1329751 | 322. 536 | 10888713. 43 |
| M326T210   | 326. 1348139 | 210. 186 | 2765238. 95  |
| M326T455   | 326. 1376408 | 454. 739 | 2242990. 084 |
| M326T104   | 326. 1376778 | 104. 493 | 15086200. 45 |
| M326T99    | 326. 1475291 | 98. 9918 | 62591920. 06 |
| M326T558   | 326. 1465635 | 557. 967 | 1785297. 874 |
| M326T87    | 326. 1428028 | 86. 6643 | 905226831. 1 |
| M326T156   | 326. 1424739 | 156. 393 | 11314708. 45 |
| M326T328   | 326. 1583979 | 328. 106 | 10210013. 23 |
| M326T446   | 326. 1718314 | 445. 984 | 4305095. 8   |
| M326T427   | 326. 1707186 | 427. 362 | 3567181. 844 |
| M326T287   | 326. 1801691 | 287. 148 | 10368264. 15 |
| M326T468   | 326. 1944548 | 467. 706 | 13082423. 17 |
| M326T419   | 326. 2069086 | 418. 97  | 2191371. 448 |
| M326T488   | 326. 20679   | 488. 437 | 952374. 3535 |
| M326T685   | 326. 2003754 | 684. 985 | 685053. 8003 |
| M326T374   | 326. 2056784 | 373. 532 | 2056479. 08  |
| M326T433   | 326. 2070447 | 433. 111 | 3105285. 321 |
| M327T379_1 | 326. 507661  | 379. 194 | 14691914. 35 |
| M327T777   | 326. 6881746 | 777. 245 | 20702294. 53 |
| M327T379_2 | 326. 8418949 | 379. 194 | 7598809. 974 |

|            |              |          |              |
|------------|--------------|----------|--------------|
| M327T82    | 326. 884146  | 82. 0569 | 8374725. 226 |
| M327T32    | 326. 9182457 | 32. 4171 | 839954. 3781 |
| M327T443   | 327. 0439044 | 443. 256 | 5837246. 504 |
| M327T339   | 327. 0492723 | 339. 085 | 3536869. 317 |
| M327T607   | 327. 0494653 | 606. 774 | 1426001. 111 |
| M327T176   | 327. 0664824 | 175. 952 | 6598100. 504 |
| M327T230   | 327. 0944212 | 230. 321 | 935208. 0233 |
| M327T496   | 327. 1059985 | 495. 779 | 2319856. 735 |
| M327T423   | 327. 106133  | 423. 199 | 2731510. 168 |
| M327T158   | 327. 1168004 | 157. 773 | 31293134     |
| M327T180   | 327. 1166591 | 179. 75  | 27031742. 68 |
| M327T190   | 327. 1167096 | 189. 571 | 33670073. 23 |
| M327T122   | 327. 1167535 | 122. 007 | 26932194. 73 |
| M327T649   | 327. 1164884 | 649. 338 | 17771442. 88 |
| M327T106   | 327. 1166778 | 105. 503 | 135606478. 7 |
| M327T199   | 327. 1168022 | 199. 43  | 20798081. 91 |
| M327T291   | 327. 116761  | 291. 307 | 75902734. 23 |
| M327T143   | 327. 1168141 | 142. 85  | 36499269. 12 |
| M327T172   | 327. 1167076 | 171. 935 | 22063775. 48 |
| M327T210   | 327. 1168844 | 210. 186 | 16309907. 49 |
| M327T93    | 327. 1165696 | 92. 7272 | 74246650. 3  |
| M327T257   | 327. 1168579 | 257. 155 | 14055111. 18 |
| M327T266   | 327. 1165937 | 265. 624 | 10250852. 07 |
| M327T442   | 327. 1209503 | 442. 005 | 4732746. 956 |
| M327T706   | 327. 1317015 | 706. 229 | 4033215. 73  |
| M327T87    | 327. 1463918 | 86. 6643 | 107943619. 1 |
| M327T503   | 327. 1533352 | 503. 046 | 3854651. 672 |
| M327T345_1 | 327. 1534991 | 344. 555 | 7323071. 005 |
| M327T572   | 327. 1590399 | 571. 523 | 5997241. 265 |
| M327T512   | 327. 1533427 | 511. 77  | 6625591. 614 |
| M327T484   | 327. 1563751 | 483. 973 | 11519500. 57 |
| M327T583   | 327. 1590258 | 583. 068 | 24792906. 65 |
| M327T107   | 327. 1547399 | 106. 513 | 11117349. 57 |
| M327T294   | 327. 1618479 | 293. 896 | 3506058. 451 |
| M327T331   | 327. 1666212 | 330. 809 | 10071105. 25 |
| M327T361   | 327. 1664941 | 360. 794 | 17907145. 92 |
| M327T318   | 327. 1667246 | 318. 497 | 31615527. 59 |
| M327T345_2 | 327. 1664724 | 344. 555 | 40751087. 11 |
| M327T462   | 327. 1761329 | 461. 845 | 2528885. 878 |
| M327T449   | 327. 1771598 | 448. 978 | 3297846. 122 |
| M327T304   | 327. 2010727 | 303. 513 | 21505748. 6  |
| M327T638   | 327. 264259  | 637. 996 | 31298419. 06 |
| M327T562   | 327. 2683137 | 561. 955 | 26131791. 1  |
| M328T798_1 | 327. 6289228 | 797. 773 | 5452809. 074 |
| M328T32    | 327. 9152627 | 32. 4171 | 2092596. 328 |
| M328T331   | 328. 013071  | 330. 809 | 813494. 9464 |
| M328T95    | 328. 1052322 | 94. 7467 | 250055411    |
| M328T154   | 328. 1108866 | 153. 785 | 25862072. 89 |
| M328T291   | 328. 1194902 | 291. 307 | 7811602. 367 |
| M328T107   | 328. 1193988 | 106. 513 | 9427300. 903 |
| M328T143   | 328. 1217313 | 142. 85  | 2296437. 281 |
| M328T798_2 | 328. 126587  | 797. 773 | 3249455. 547 |
| M328T305_1 | 328. 1241557 | 304. 777 | 1988546. 557 |
| M328T369   | 328. 1378203 | 369. 321 | 11205491. 38 |

|            |              |          |              |
|------------|--------------|----------|--------------|
| M328T439   | 328. 1391812 | 439. 021 | 6188307. 244 |
| M328T346   | 328. 1378072 | 345. 848 | 784822451. 4 |
| M328T299   | 328. 1378007 | 299. 493 | 95247206. 31 |
| M328T254   | 328. 1377891 | 254. 446 | 18787176. 5  |
| M328T88    | 328. 1488591 | 87. 6739 | 16892901. 11 |
| M328T453   | 328. 1531362 | 453. 317 | 36158552. 05 |
| M328T419   | 328. 1531168 | 418. 97  | 27978586. 36 |
| M328T109   | 328. 157458  | 108. 698 | 8596220. 446 |
| M328T442   | 328. 1531446 | 442. 005 | 1816368. 178 |
| M328T128   | 328. 1600917 | 127. 944 | 20475482. 75 |
| M328T192   | 328. 1588623 | 192. 437 | 3120633. 605 |
| M328T318   | 328. 1590866 | 318. 497 | 3178926. 815 |
| M328T583   | 328. 1589106 | 583. 068 | 4228160. 122 |
| M328T409   | 328. 167291  | 409. 271 | 2275866. 691 |
| M328T579   | 328. 1742255 | 578. 816 | 859969. 712  |
| M328T323   | 328. 1729857 | 322. 536 | 6210638. 852 |
| M328T433   | 328. 1743103 | 433. 111 | 6377828. 75  |
| M328T465   | 328. 1860847 | 464. 668 | 3285524. 761 |
| M328T335   | 328. 1969033 | 334. 966 | 13155049. 67 |
| M328T416   | 328. 2096145 | 416. 239 | 3224373. 128 |
| M328T305_2 | 328. 2052168 | 304. 777 | 1851466. 198 |
| M328T436   | 328. 2196479 | 436. 069 | 16333345. 77 |
| M328T463   | 328. 2222332 | 463. 271 | 40462565. 1  |
| M328T411   | 328. 2294271 | 410. 542 | 10234125. 26 |
| M328T756   | 328. 2624372 | 755. 537 | 1658649. 186 |
| M328T777   | 328. 3179326 | 777. 245 | 18786298. 88 |
| M328T823   | 328. 3561846 | 822. 881 | 8061808. 448 |
| M328T295   | 328. 4902769 | 295. 356 | 10423841. 58 |
| M329T32    | 328. 9125658 | 32. 4171 | 5546338. 962 |
| M329T205   | 329. 0274853 | 204. 747 | 11713578. 16 |
| M329T393   | 329. 0771909 | 392. 715 | 18765152. 33 |
| M329T306   | 329. 0830869 | 306. 247 | 17099241. 17 |
| M329T278   | 329. 096802  | 277. 699 | 4790529. 852 |
| M329T622   | 329. 1123782 | 621. 708 | 4011054. 331 |
| M329T419_1 | 329. 1122064 | 418. 97  | 3445088. 941 |
| M329T95    | 329. 1107453 | 94. 7467 | 18504594. 37 |
| M329T439   | 329. 1396828 | 439. 021 | 458115. 7501 |
| M329T106   | 329. 1330841 | 105. 503 | 7769437. 241 |
| M329T345   | 329. 1421085 | 344. 555 | 125331606. 3 |
| M329T299   | 329. 142027  | 299. 493 | 10090968. 48 |
| M329T321   | 329. 1447731 | 321. 198 | 24658004. 93 |
| M329T365   | 329. 1424576 | 365. 061 | 13084764. 96 |
| M329T459   | 329. 1511338 | 458. 985 | 14254645. 07 |
| M329T432   | 329. 1511451 | 431. 64  | 4329155. 815 |
| M329T419_2 | 329. 1576455 | 418. 97  | 6117870. 055 |
| M329T504   | 329. 1590832 | 504. 466 | 6206369. 559 |
| M329T792_1 | 329. 1715684 | 792. 146 | 12067028. 16 |
| M329T339   | 329. 1802909 | 339. 085 | 2166287. 521 |
| M329T304   | 329. 1803137 | 303. 513 | 5341064. 94  |
| M329T358   | 329. 1792611 | 357. 958 | 6329932. 629 |
| M329T788   | 329. 2154767 | 787. 856 | 12568170. 38 |
| M329T525   | 329. 2156498 | 525. 132 | 10332822. 19 |
| M329T739   | 329. 2310887 | 738. 697 | 6961348. 26  |
| M329T787   | 329. 2284215 | 786. 569 | 22940381. 11 |

|            |              |          |              |
|------------|--------------|----------|--------------|
| M329T792_2 | 329. 2536402 | 792. 146 | 1019764. 698 |
| M329T824   | 329. 3590601 | 824. 311 | 1581542. 224 |
| M330T455   | 329. 6883042 | 454. 739 | 3267230. 872 |
| M330T32    | 329. 9166841 | 32. 4171 | 559219. 7468 |
| M330T169   | 330. 0571972 | 169. 221 | 36508124. 84 |
| M330T195   | 330. 0571904 | 195. 23  | 86126188. 02 |
| M330T121   | 330. 0685295 | 120. 525 | 8398002. 945 |
| M330T95    | 330. 1073972 | 94. 7467 | 2628847. 457 |
| M330T104   | 330. 1169311 | 104. 493 | 17782884. 93 |
| M330T725   | 330. 1279938 | 725. 212 | 13306955. 72 |
| M330T123   | 330. 1270277 | 123. 262 | 2854097. 062 |
| M330T736   | 330. 1281539 | 735. 7   | 8186461. 394 |
| M330T305   | 330. 1282243 | 304. 777 | 6119417. 909 |
| M330T534   | 330. 1324654 | 533. 958 | 12059142. 24 |
| M330T673   | 330. 1364423 | 672. 956 | 3791590. 832 |
| M330T102   | 330. 1379312 | 102. 247 | 4310215. 179 |
| M330T137   | 330. 1396713 | 137. 373 | 13896842. 71 |
| M330T545   | 330. 1397564 | 545. 203 | 8908515. 605 |
| M330T107   | 330. 1524152 | 106. 513 | 16078724. 81 |
| M330T263_1 | 330. 1524212 | 262. 529 | 177621350. 4 |
| M330T205   | 330. 152473  | 204. 747 | 36608652. 95 |
| M330T180   | 330. 1520765 | 179. 75  | 17454580. 59 |
| M330T345   | 330. 1479362 | 344. 555 | 16113163. 48 |
| M330T249   | 330. 1522789 | 248. 895 | 86243214. 38 |
| M330T304   | 330. 1524877 | 303. 513 | 7485108. 954 |
| M330T222   | 330. 1522952 | 222. 017 | 41655878. 73 |
| M330T163   | 330. 1552335 | 162. 728 | 21839954. 76 |
| M330T263_2 | 330. 163073  | 262. 529 | 8658635. 873 |
| M330T346   | 330. 1631188 | 345. 848 | 74589141. 09 |
| M330T402   | 330. 166525  | 401. 963 | 11745528. 03 |
| M330T471   | 330. 1679824 | 470. 602 | 8433106. 536 |
| M330T329   | 330. 1867622 | 329. 481 | 10175920. 34 |
| M330T415   | 330. 2009743 | 414. 82  | 3157070. 046 |
| M330T706   | 330. 2022083 | 706. 229 | 6640691. 899 |
| M330T403   | 330. 2008155 | 403. 447 | 2090398. 086 |
| M330T423   | 330. 200792  | 423. 199 | 2325000. 676 |
| M330T379   | 330. 2000882 | 379. 194 | 5836179. 442 |
| M330T429   | 330. 22643   | 428. 735 | 3343463. 81  |
| M330T456   | 330. 2278633 | 456. 126 | 4220116. 503 |
| M330T787   | 330. 2322828 | 786. 569 | 3628222. 385 |
| M330T472   | 330. 2405921 | 472. 132 | 11155124. 7  |
| M330T814   | 330. 2619418 | 814. 095 | 44646414. 97 |
| M330T579   | 330. 2976302 | 578. 816 | 3965678. 973 |
| M330T830   | 330. 3012359 | 830. 193 | 11540137. 99 |
| M331T477   | 330. 5751725 | 476. 554 | 2361990. 283 |
| M331T32    | 330. 913371  | 32. 4171 | 1268071. 524 |
| M331T263   | 331. 0258849 | 262. 529 | 7944557. 84  |
| M331T126   | 331. 0496686 | 125. 598 | 1684443. 697 |
| M331T443   | 331. 0562002 | 443. 256 | 5697418. 305 |
| M331T309   | 331. 0645342 | 308. 967 | 37554891. 31 |
| M331T325   | 331. 0646491 | 325. 35  | 60680720. 92 |
| M331T295   | 331. 064636  | 295. 356 | 35689185. 51 |
| M331T195   | 331. 0619087 | 195. 23  | 7767629. 977 |
| M331T777   | 331. 0731646 | 777. 245 | 9896485. 927 |

|          |              |          |              |
|----------|--------------|----------|--------------|
| M331T257 | 331. 1003507 | 257. 155 | 2844117. 227 |
| M331T320 | 331. 1003501 | 319. 758 | 2288134. 283 |
| M331T631 | 331. 1144787 | 630. 507 | 9827266. 647 |
| M331T161 | 331. 1230867 | 161. 494 | 29526950. 24 |
| M331T205 | 331. 1232301 | 204. 747 | 474295909. 8 |
| M331T143 | 331. 1232145 | 142. 85  | 7043905. 21  |
| M331T177 | 331. 1232749 | 177. 295 | 165821107. 1 |
| M331T218 | 331. 1231451 | 217. 866 | 24569310. 92 |
| M331T194 | 331. 1231761 | 193. 823 | 504922194. 5 |
| M331T284 | 331. 1231752 | 284. 377 | 24990628. 84 |
| M331T574 | 331. 1277666 | 574. 363 | 898978. 1564 |
| M331T462 | 331. 1341796 | 461. 845 | 2128404. 652 |
| M331T100 | 331. 1490629 | 100. 146 | 24497456     |
| M331T291 | 331. 1497102 | 291. 307 | 12613749. 99 |
| M331T346 | 331. 1487565 | 345. 848 | 4919247. 289 |
| M331T90  | 331. 1489372 | 89. 6999 | 20425537. 19 |
| M331T603 | 331. 1509371 | 602. 513 | 10262251. 62 |
| M331T221 | 331. 155953  | 220. 676 | 7908365. 34  |
| M331T249 | 331. 1574831 | 248. 895 | 12836590. 98 |
| M331T530 | 331. 1511159 | 529. 713 | 5941342. 54  |
| M331T261 | 331. 1573697 | 261. 177 | 27991453. 23 |
| M331T106 | 331. 1599385 | 105. 503 | 5762954. 021 |
| M331T401 | 331. 1711234 | 400. 59  | 2510431. 121 |
| M331T472 | 331. 1727676 | 472. 132 | 3138852. 257 |
| M331T809 | 331. 1874457 | 808. 678 | 13293931. 68 |
| M331T335 | 331. 185495  | 334. 966 | 2042218. 763 |
| M331T718 | 331. 1860084 | 717. 959 | 4281753. 953 |
| M331T832 | 331. 1814748 | 831. 709 | 7011626. 656 |
| M331T438 | 331. 1855412 | 437. 571 | 1613138. 2   |
| M331T813 | 331. 2260903 | 812. 862 | 4389555. 555 |
| M331T800 | 331. 2259717 | 800. 484 | 21342709. 02 |
| M331T705 | 331. 2476385 | 704. 715 | 4572659. 884 |
| M331T673 | 331. 2459501 | 672. 956 | 4088068. 171 |
| M331T783 | 331. 2461787 | 782. 558 | 4903692. 92  |
| M331T811 | 331. 281742  | 811. 413 | 5779375. 328 |
| M331T816 | 331. 3376782 | 815. 517 | 3606341. 745 |
| M332T482 | 331. 6094464 | 482. 436 | 4541079. 794 |
| M332T823 | 331. 6754938 | 822. 881 | 15560574. 24 |
| M332T401 | 331. 8544279 | 400. 59  | 1229912      |
| M332T66  | 331. 9146483 | 65. 7101 | 1460902. 028 |
| M332T443 | 332. 0483152 | 443. 256 | 4179480. 45  |
| M332T234 | 332. 0628196 | 234. 447 | 4105194. 029 |
| M332T309 | 332. 0666011 | 308. 967 | 4632559. 054 |
| M332T325 | 332. 0706369 | 325. 35  | 5693032. 651 |
| M332T372 | 332. 1326806 | 372. 152 | 16089858. 81 |
| M332T459 | 332. 1315188 | 458. 985 | 1746911. 191 |
| M332T106 | 332. 1325892 | 105. 503 | 35944701. 25 |
| M332T197 | 332. 1325086 | 196. 644 | 120452153    |
| M332T284 | 332. 1262595 | 284. 377 | 1037250. 935 |
| M332T164 | 332. 1328404 | 163. 846 | 85574829. 49 |
| M332T294 | 332. 142726  | 293. 896 | 8354473. 235 |
| M332T143 | 332. 1413103 | 142. 85  | 6114917. 91  |
| M332T384 | 332. 1474952 | 383. 536 | 3112068. 232 |
| M332T317 | 332. 1427016 | 317. 199 | 4443463. 038 |



|            |              |          |              |
|------------|--------------|----------|--------------|
| M332T600   | 332. 147972  | 599. 621 | 7358690. 049 |
| M332T413   | 332. 1482788 | 413. 295 | 3115959. 717 |
| M332T261   | 332. 1588993 | 261. 177 | 3364923. 198 |
| M332T129   | 332. 168539  | 129. 234 | 5639453. 123 |
| M332T318   | 332. 1699813 | 318. 497 | 3461273. 17  |
| M332T104   | 332. 1685416 | 104. 493 | 8503596. 99  |
| M332T393   | 332. 1749086 | 392. 715 | 5051885. 852 |
| M332T403   | 332. 1753998 | 403. 447 | 4519375. 964 |
| M332T341   | 332. 1814548 | 340. 548 | 14199549. 12 |
| M332T369   | 332. 2157715 | 369. 321 | 11345566. 33 |
| M332T451   | 332. 2157877 | 450. 503 | 4620944. 974 |
| M332T442   | 332. 2159172 | 442. 005 | 8187649. 772 |
| M332T490   | 332. 217375  | 489. 826 | 7003201. 189 |
| M332T379   | 332. 2159591 | 379. 194 | 16378308. 29 |
| M332T480   | 332. 217224  | 479. 527 | 11415322. 47 |
| M332T802_1 | 332. 2281443 | 801. 685 | 2185805. 944 |
| M332T522   | 332. 2416555 | 522. 177 | 6111496. 653 |
| M332T535   | 332. 2417165 | 535. 329 | 14582268. 29 |
| M332T770   | 332. 2905179 | 769. 702 | 323055057. 6 |
| M332T777   | 332. 2905502 | 777. 245 | 189520810. 2 |
| M332T750   | 332. 3148368 | 749. 96  | 9609138. 633 |
| M332T765   | 332. 3167897 | 765. 406 | 102206152. 3 |
| M332T787   | 332. 313592  | 786. 569 | 5247818. 199 |
| M332T802_2 | 332. 3135167 | 801. 685 | 29104248. 87 |
| M332T829   | 332. 3275853 | 828. 73  | 8342681. 069 |
| M333T491_1 | 332. 8685459 | 491. 373 | 3779267. 191 |
| M333T75    | 332. 9624425 | 74. 9588 | 9932866. 593 |
| M333T89_1  | 333. 0673588 | 88. 6838 | 22889215. 85 |
| M333T239   | 333. 1071193 | 238. 605 | 669989. 7969 |
| M333T206   | 333. 1332912 | 205. 903 | 5578583. 909 |
| M333T106   | 333. 1373886 | 105. 503 | 5887579. 5   |
| M333T181   | 333. 1331322 | 181. 154 | 4028843. 461 |
| M333T197   | 333. 1329952 | 196. 644 | 18628488. 78 |
| M333T351   | 333. 1439347 | 351. 348 | 3961140. 327 |
| M333T163   | 333. 1382781 | 162. 728 | 24950063. 72 |
| M333T420   | 333. 1439579 | 420. 274 | 5079124. 556 |
| M333T584   | 333. 1649896 | 584. 417 | 2487916. 732 |
| M333T89_2  | 333. 1656061 | 88. 6838 | 81786778. 49 |
| M333T342   | 333. 1637281 | 341. 802 | 14227807. 19 |
| M333T250   | 333. 1683863 | 250. 144 | 4180906. 017 |
| M333T816   | 333. 1727876 | 815. 517 | 1199802. 726 |
| M333T201   | 333. 1741324 | 200. 766 | 2778868. 002 |
| M333T268   | 333. 1685482 | 268. 427 | 18865874. 11 |
| M333T345   | 333. 1803098 | 344. 555 | 7626738. 327 |
| M333T304   | 333. 1752524 | 303. 513 | 3803062. 345 |
| M333T461   | 333. 188451  | 460. 537 | 3410903. 834 |
| M333T509   | 333. 1897597 | 508. 883 | 3953428. 053 |
| M333T525   | 333. 1879822 | 525. 132 | 2291993. 689 |
| M333T379   | 333. 1828151 | 379. 194 | 2830645. 408 |
| M333T534   | 333. 1910369 | 533. 958 | 2111567. 764 |
| M333T794   | 333. 2028512 | 793. 649 | 26435962. 87 |
| M333T836   | 333. 2009705 | 836. 034 | 23952204. 41 |
| M333T821   | 333. 2028648 | 821. 334 | 20123692. 82 |
| M333T803   | 333. 204282  | 802. 88  | 16942825. 9  |

|            |              |          |              |
|------------|--------------|----------|--------------|
| M333T677   | 333. 2045243 | 677. 376 | 3539538. 578 |
| M333T491_2 | 333. 2068966 | 491. 373 | 2363931. 543 |
| M333T783   | 333. 2078687 | 782. 558 | 18781828. 94 |
| M333T767   | 333. 3169059 | 766. 742 | 18804577. 34 |
| M334T493   | 333. 5393592 | 492. 895 | 802168. 7851 |
| M334T402   | 333. 8687185 | 401. 963 | 1309587. 227 |
| M334T311   | 334. 0757084 | 311. 445 | 4270336. 258 |
| M334T388   | 334. 1267293 | 387. 763 | 5168580. 362 |
| M334T573   | 334. 1266441 | 573. 072 | 1969958. 038 |
| M334T513   | 334. 1291214 | 513. 285 | 3713545. 164 |
| M334T419   | 334. 1279573 | 418. 97  | 6267334. 468 |
| M334T500   | 334. 1380246 | 500. 045 | 2030248. 101 |
| M334T455   | 334. 1405427 | 454. 739 | 4382835. 22  |
| M334T293   | 334. 1479861 | 292. 623 | 11487008. 39 |
| M334T310_1 | 334. 1433346 | 310. 075 | 9572021. 248 |
| M334T389   | 334. 1429353 | 389. 035 | 5821135. 599 |
| M334T339   | 334. 1481575 | 339. 085 | 77542565. 11 |
| M334T364   | 334. 148126  | 363. 58  | 32531643. 31 |
| M334T104   | 334. 148187  | 104. 493 | 24381523. 74 |
| M334T372   | 334. 1567304 | 372. 152 | 1439402. 004 |
| M334T268   | 334. 1564202 | 268. 427 | 2374342. 087 |
| M334T207   | 334. 1597539 | 207. 393 | 3171263. 129 |
| M334T325   | 334. 1622754 | 325. 35  | 10010352. 63 |
| M334T310_2 | 334. 1567929 | 310. 075 | 43895154. 71 |
| M334T243   | 334. 1590247 | 242. 682 | 4227574. 896 |
| M334T394   | 334. 1626507 | 393. 934 | 4636229. 257 |
| M334T215   | 334. 1597531 | 215. 068 | 3108824. 21  |
| M334T386   | 334. 1626193 | 386. 352 | 11391931. 05 |
| M334T89    | 334. 1669521 | 88. 6838 | 10778433. 93 |
| M334T451   | 334. 1755377 | 450. 503 | 3222355. 508 |
| M334T463   | 334. 1835757 | 463. 271 | 3972595. 387 |
| M334T449   | 334. 2205351 | 448. 978 | 1980744. 521 |
| M334T715   | 334. 2718293 | 715. 011 | 8000125. 721 |
| M335T84    | 334. 9941363 | 83. 5661 | 94324755. 73 |
| M335T666   | 335. 0591045 | 666. 137 | 759117. 3655 |
| M335T310_1 | 335. 0784405 | 310. 075 | 10877850. 51 |
| M335T301   | 335. 0783932 | 300. 782 | 21569507. 31 |
| M335T328   | 335. 0819304 | 328. 106 | 2616191. 298 |
| M335T429   | 335. 1176163 | 428. 735 | 2557809. 354 |
| M335T390   | 335. 1323874 | 390. 432 | 13443400. 71 |
| M335T106   | 335. 1423732 | 105. 503 | 19002311. 67 |
| M335T89    | 335. 1438229 | 88. 6838 | 15048552. 5  |
| M335T339   | 335. 1522412 | 339. 085 | 1617460. 908 |
| M335T364   | 335. 1541137 | 363. 58  | 3982890. 791 |
| M335T323   | 335. 1600591 | 322. 536 | 8793292. 086 |
| M335T104   | 335. 1561989 | 104. 493 | 17290943. 79 |
| M335T310_2 | 335. 1650683 | 310. 075 | 6793700. 487 |
| M335T361   | 335. 1697941 | 360. 794 | 3069914. 11  |
| M335T448   | 335. 1684722 | 447. 531 | 8426534. 927 |
| M335T384   | 335. 1792899 | 383. 536 | 2047372. 011 |
| M335T435   | 335. 1931071 | 434. 589 | 3611484. 5   |
| M335T773   | 335. 2136155 | 773. 437 | 8396698. 467 |
| M335T791   | 335. 2179118 | 790. 802 | 49696064. 34 |
| M335T623   | 335. 2209842 | 623. 11  | 3607589. 161 |

|            |              |          |              |
|------------|--------------|----------|--------------|
| M335T838   | 335. 2178606 | 837. 524 | 32770891. 07 |
| M335T814   | 335. 2179581 | 814. 095 | 336776772. 4 |
| M336T301   | 335. 5821127 | 300. 782 | 5429965. 64  |
| M336T746   | 335. 628187  | 745. 603 | 4820198. 741 |
| M336T142   | 336. 0906183 | 141. 825 | 5350523. 146 |
| M336T626   | 336. 1198641 | 626. 042 | 314064778. 8 |
| M336T101   | 336. 1278819 | 101. 161 | 19498954. 82 |
| M336T163   | 336. 1264865 | 162. 728 | 5819547. 781 |
| M336T143   | 336. 1264976 | 142. 85  | 9623393. 334 |
| M336T284   | 336. 1263066 | 284. 377 | 5107241. 025 |
| M336T351   | 336. 1441431 | 351. 348 | 10580165. 13 |
| M336T398   | 336. 1425136 | 397. 878 | 3781808. 325 |
| M336T104_1 | 336. 1381479 | 104. 493 | 22640121. 41 |
| M336T327   | 336. 1440476 | 326. 78  | 3177677. 577 |
| M336T413_1 | 336. 1585851 | 413. 295 | 10916236. 41 |
| M336T346   | 336. 1549875 | 345. 848 | 5424893. 391 |
| M336T425   | 336. 1585138 | 424. 572 | 12102625. 48 |
| M336T453   | 336. 1650705 | 453. 317 | 48369730. 26 |
| M336T225   | 336. 1637616 | 224. 729 | 2262283. 577 |
| M336T318   | 336. 1644766 | 318. 497 | 15328470. 74 |
| M336T104_2 | 336. 1644445 | 104. 493 | 11375504. 81 |
| M336T413_2 | 336. 169814  | 413. 295 | 17896409. 02 |
| M336T589   | 336. 1677113 | 589. 053 | 715273. 5416 |
| M336T522   | 336. 1883462 | 522. 177 | 3822452. 824 |
| M336T474   | 336. 190695  | 473. 597 | 6814850. 607 |
| M336T465   | 336. 1908303 | 464. 668 | 4538507. 461 |
| M336T233   | 336. 2112711 | 233. 081 | 8225170. 586 |
| M336T816_1 | 336. 2234121 | 815. 517 | 61427782. 94 |
| M336T816_2 | 336. 2505417 | 815. 517 | 18091252. 93 |
| M336T764   | 336. 2594645 | 763. 856 | 26821529. 03 |
| M336T662   | 336. 2879611 | 661. 979 | 1590718. 753 |
| M337T764   | 336. 5917118 | 763. 856 | 16811451. 63 |
| M337T237   | 336. 5974245 | 237. 171 | 746002. 6492 |
| M337T84    | 336. 9872101 | 83. 5661 | 20997484. 46 |
| M337T108   | 337. 0751085 | 107. 537 | 64245560. 99 |
| M337T301   | 337. 0726558 | 300. 782 | 69169278. 12 |
| M337T163   | 337. 0752622 | 162. 728 | 326290462. 4 |
| M337T202   | 337. 0752283 | 202. 149 | 30794767. 2  |
| M337T129   | 337. 0752793 | 129. 234 | 44620180. 59 |
| M337T250   | 337. 075222  | 250. 144 | 45355786. 05 |
| M337T143   | 337. 0752764 | 142. 85  | 295709244. 3 |
| M337T212   | 337. 0752512 | 212. 448 | 26435301. 6  |
| M337T393   | 337. 0856034 | 392. 715 | 5102413. 299 |
| M337T293   | 337. 1044827 | 292. 623 | 1628392. 463 |
| M337T101   | 337. 1109828 | 101. 161 | 13255903. 1  |
| M337T832   | 337. 1099558 | 831. 709 | 18446214. 92 |
| M337T566   | 337. 1376634 | 565. 79  | 3473517. 592 |
| M337T399   | 337. 1370951 | 399. 046 | 4464158. 935 |
| M337T334   | 337. 1385022 | 333. 715 | 18591898. 99 |
| M337T371   | 337. 1500261 | 370. 777 | 24828834. 56 |
| M337T354   | 337. 1500326 | 353. 978 | 21333418. 65 |
| M337T190   | 337. 1617544 | 189. 571 | 61112590. 76 |
| M337T169   | 337. 1618525 | 169. 221 | 493619864. 7 |
| M337T406   | 337. 1588115 | 406. 289 | 17142339. 25 |

|            |              |          |              |
|------------|--------------|----------|--------------|
| M337T104   | 337. 160431  | 104. 493 | 52592457. 46 |
| M337T148   | 337. 1616926 | 148. 117 | 46641337. 53 |
| M337T767   | 337. 1675176 | 766. 742 | 35814933. 06 |
| M337T453   | 337. 1677273 | 453. 317 | 7179122. 142 |
| M337T205   | 337. 1667949 | 204. 747 | 3850957. 367 |
| M337T86    | 337. 1691622 | 85. 6453 | 4563938010   |
| M337T131   | 337. 1670277 | 130. 668 | 3432327. 996 |
| M337T103   | 337. 1728664 | 103. 423 | 15867049     |
| M337T740   | 337. 1988673 | 740. 014 | 3123131. 688 |
| M337T811   | 337. 2337054 | 811. 413 | 77826738. 28 |
| M337T703   | 337. 2360327 | 703. 35  | 2149509. 706 |
| M337T642   | 337. 2358401 | 642. 211 | 484015. 8209 |
| M337T800   | 337. 2337289 | 800. 484 | 9348443. 302 |
| M337T821   | 337. 2336884 | 821. 334 | 29526018. 43 |
| M337T814_1 | 337. 255091  | 814. 095 | 3575508. 112 |
| M337T794   | 337. 2719338 | 793. 649 | 66792112. 56 |
| M337T807   | 337. 2719182 | 807. 232 | 33675543. 54 |
| M337T814_2 | 337. 2719068 | 814. 095 | 32706511. 53 |
| M337T836   | 337. 2720189 | 836. 034 | 8717343. 337 |
| M338T516_1 | 337. 6671656 | 516. 214 | 3878871. 417 |
| M338T516_2 | 337. 9174544 | 516. 214 | 2567223. 024 |
| M338T75    | 337. 9687532 | 74. 9588 | 21270404. 17 |
| M338T164   | 338. 0781535 | 163. 846 | 40991054. 18 |
| M338T143_1 | 338. 078083  | 142. 85  | 40430636. 81 |
| M338T301   | 338. 0781918 | 300. 782 | 6390505. 105 |
| M338T730   | 338. 1142794 | 729. 798 | 12391520. 04 |
| M338T416   | 338. 1210187 | 416. 239 | 9509790. 637 |
| M338T426   | 338. 1215485 | 425. 909 | 6144805. 865 |
| M338T347   | 338. 1312967 | 347. 175 | 8067050. 406 |
| M338T579   | 338. 1343444 | 578. 816 | 9066851. 727 |
| M338T375   | 338. 1342073 | 375. 021 | 54084774. 41 |
| M338T572   | 338. 1344158 | 571. 523 | 19784124. 2  |
| M338T389_1 | 338. 1340631 | 389. 035 | 22327448. 93 |
| M338T418   | 338. 134204  | 417. 676 | 1546611. 817 |
| M338T396   | 338. 1342112 | 396. 415 | 10992678. 05 |
| M338T823   | 338. 1360398 | 822. 881 | 1706316. 408 |
| M338T96    | 338. 1426405 | 95. 7572 | 21823807. 4  |
| M338T143_2 | 338. 1431571 | 142. 85  | 20662871. 93 |
| M338T104   | 338. 1426339 | 104. 493 | 35202389. 24 |
| M338T446   | 338. 1578785 | 445. 984 | 5979658. 351 |
| M338T94    | 338. 1546574 | 93. 7378 | 228741020. 5 |
| M338T357   | 338. 1579076 | 356. 74  | 133394936. 9 |
| M338T191   | 338. 1619457 | 190. 962 | 8416661. 994 |
| M338T169   | 338. 1638322 | 169. 221 | 65418895. 19 |
| M338T423   | 338. 1690786 | 423. 199 | 3434768. 258 |
| M338T148   | 338. 1639546 | 148. 117 | 5832550. 383 |
| M338T480   | 338. 1660177 | 479. 527 | 4693718. 636 |
| M338T86    | 338. 1771986 | 85. 6453 | 471901806. 3 |
| M338T389_2 | 338. 1725318 | 389. 035 | 7001873. 816 |
| M338T205   | 338. 1806911 | 204. 747 | 3438099. 883 |
| M338T362   | 338. 179544  | 362. 146 | 4856380. 408 |
| M338T515   | 338. 1960526 | 514. 727 | 38589625. 38 |
| M338T802   | 338. 2677361 | 801. 685 | 3156571. 149 |
| M338T794   | 338. 2752501 | 793. 649 | 7493022. 411 |

|            |              |          |              |
|------------|--------------|----------|--------------|
| M338T829   | 338. 3406934 | 828. 73  | 4475662475   |
| M338T31    | 338. 335607  | 31. 4047 | 52137350. 27 |
| M339T833_1 | 338. 5396535 | 833. 029 | 1965059. 992 |
| M339T826   | 338. 5395978 | 825. 74  | 1326951. 101 |
| M339T503   | 338. 5799563 | 503. 046 | 3359332. 976 |
| M339T75    | 338. 9697052 | 74. 9588 | 9244464. 136 |
| M339T741_1 | 338. 9990987 | 741. 302 | 6877291. 849 |
| M339T348   | 339. 047928  | 348. 488 | 1527687. 9   |
| M339T119   | 339. 0738519 | 119. 433 | 81652386. 5  |
| M339T663   | 339. 0709382 | 663. 287 | 14572170. 09 |
| M339T135   | 339. 0725104 | 134. 574 | 7088207. 235 |
| M339T652   | 339. 0707324 | 651. 956 | 7075752. 365 |
| M339T150   | 339. 0901732 | 149. 65  | 17381998. 61 |
| M339T572   | 339. 1063814 | 571. 523 | 19094811. 66 |
| M339T422   | 339. 1063175 | 421. 784 | 45065547. 8  |
| M339T90    | 339. 1005503 | 89. 6999 | 155105345. 1 |
| M339T548   | 339. 1064868 | 548. 114 | 60560205. 71 |
| M339T466   | 339. 1065337 | 466. 162 | 48035052. 34 |
| M339T448   | 339. 1065219 | 447. 531 | 16998031. 7  |
| M339T525   | 339. 1064384 | 525. 132 | 12755665. 44 |
| M339T608   | 339. 1064511 | 608. 261 | 9986039. 241 |
| M339T724   | 339. 1147759 | 723. 682 | 823905. 0815 |
| M339T329   | 339. 1197786 | 329. 481 | 1702264. 95  |
| M339T547_1 | 339. 1219555 | 546. 651 | 9407317. 081 |
| M339T468   | 339. 123512  | 467. 706 | 4772784. 027 |
| M339T376   | 339. 1362435 | 376. 409 | 6825517. 78  |
| M339T459   | 339. 1532115 | 458. 985 | 2608538. 141 |
| M339T416   | 339. 1538464 | 416. 239 | 3227813. 642 |
| M339T334   | 339. 1539568 | 333. 715 | 11435162. 99 |
| M339T673   | 339. 1569043 | 672. 956 | 2541874. 239 |
| M339T94    | 339. 1582615 | 93. 7378 | 24717684. 75 |
| M339T295   | 339. 1538885 | 295. 356 | 16126947. 66 |
| M339T320   | 339. 154047  | 319. 758 | 16713279. 2  |
| M339T757   | 339. 1598391 | 757. 001 | 5892995. 693 |
| M339T324   | 339. 1669653 | 323. 984 | 13952577. 13 |
| M339T770   | 339. 1607265 | 769. 702 | 4972550. 132 |
| M339T169   | 339. 1642199 | 169. 221 | 10323522. 9  |
| M339T357   | 339. 1631192 | 356. 74  | 24417232. 71 |
| M339T190   | 339. 1745031 | 189. 571 | 4126370. 741 |
| M339T741_2 | 339. 1775524 | 741. 302 | 4113016. 666 |
| M339T418   | 339. 1910659 | 417. 676 | 6028079. 878 |
| M339T809   | 339. 2138894 | 808. 678 | 12865778. 04 |
| M339T668   | 339. 2144479 | 667. 609 | 8999308. 434 |
| M339T748   | 339. 2413035 | 748. 486 | 2354651. 491 |
| M339T739   | 339. 241473  | 738. 697 | 7020141. 961 |
| M339T731   | 339. 2427197 | 731. 347 | 3691018. 793 |
| M339T449   | 339. 2648557 | 448. 978 | 8046107. 533 |
| M339T535   | 339. 2677458 | 535. 329 | 7664288. 559 |
| M339T547_2 | 339. 2664141 | 546. 651 | 16776255. 53 |
| M339T31    | 339. 3404299 | 31. 4047 | 11187000. 81 |
| M339T833_2 | 339. 3435456 | 833. 029 | 1230835749   |
| M339T753   | 339. 3715679 | 752. 541 | 4474448. 568 |
| M340T121   | 339. 5780258 | 120. 525 | 21561340. 11 |
| M340T372_1 | 339. 6846467 | 372. 152 | 10948188. 14 |

|            |              |          |              |
|------------|--------------|----------|--------------|
| M340T443   | 339. 6960625 | 443. 256 | 9188523. 23  |
| M340T540   | 340. 0433148 | 539. 764 | 31977842. 61 |
| M340T487   | 340. 067033  | 486. 885 | 5064151. 949 |
| M340T274   | 340. 0857809 | 273. 531 | 1553634. 167 |
| M340T493   | 340. 1005879 | 492. 895 | 6717512. 79  |
| M340T465   | 340. 1079906 | 464. 668 | 7934527. 396 |
| M340T548   | 340. 1078568 | 548. 114 | 8513838. 515 |
| M340T423_1 | 340. 1123758 | 423. 199 | 6507344. 067 |
| M340T101   | 340. 1229768 | 101. 161 | 21689040. 09 |
| M340T94    | 340. 122818  | 93. 7378 | 16113894. 44 |
| M340T143_1 | 340. 1233572 | 142. 85  | 8052598. 669 |
| M340T468   | 340. 1242619 | 467. 706 | 1099046. 632 |
| M340T308_1 | 340. 1364067 | 307. 735 | 33726961. 82 |
| M340T485   | 340. 136364  | 485. 471 | 12539306. 97 |
| M340T449   | 340. 1363797 | 448. 978 | 10360383. 12 |
| M340T403   | 340. 1362632 | 403. 447 | 16235760. 59 |
| M340T423_2 | 340. 1365656 | 423. 199 | 5818074. 358 |
| M340T327   | 340. 1364947 | 326. 78  | 25168307. 16 |
| M340T351   | 340. 1466792 | 351. 348 | 15984775. 57 |
| M340T439   | 340. 144759  | 439. 021 | 2271368. 911 |
| M340T334   | 340. 1467764 | 333. 715 | 10176260. 75 |
| M340T395   | 340. 1497393 | 395. 264 | 7001924. 818 |
| M340T308_2 | 340. 1467698 | 307. 735 | 4563248. 84  |
| M340T122   | 340. 1600454 | 122. 007 | 7126814. 695 |
| M340T207   | 340. 1589418 | 207. 393 | 1794045. 062 |
| M340T143_2 | 340. 1600084 | 142. 85  | 7718931. 844 |
| M340T191   | 340. 1593837 | 190. 962 | 2876979. 782 |
| M340T104   | 340. 160056  | 104. 493 | 30185695. 05 |
| M340T357   | 340. 1656758 | 356. 74  | 1778542. 65  |
| M340T86    | 340. 1783111 | 85. 6453 | 7958904. 332 |
| M340T372_2 | 340. 1825895 | 372. 152 | 4387331. 254 |
| M340T491   | 340. 1850566 | 491. 373 | 5727984. 912 |
| M340T502   | 340. 185005  | 501. 549 | 3810028. 005 |
| M340T320   | 340. 1958551 | 319. 758 | 6812708. 641 |
| M340T751   | 340. 2511849 | 751. 333 | 32148680. 16 |
| M340T834   | 340. 3461893 | 834. 486 | 43207364. 91 |
| M340T827   | 340. 3477308 | 827. 271 | 82151409. 7  |
| M340T374   | 340. 4340121 | 373. 532 | 1417071. 642 |
| M341T118   | 340. 996132  | 118. 116 | 11596950. 79 |
| M341T211   | 341. 0342639 | 211. 288 | 1599839. 575 |
| M341T540   | 341. 0461885 | 539. 764 | 3268925. 548 |
| M341T487_1 | 341. 0540345 | 486. 885 | 7460411. 147 |
| M341T821   | 341. 061741  | 821. 334 | 10202144. 95 |
| M341T487_2 | 341. 0660231 | 486. 885 | 404344. 2455 |
| M341T308   | 341. 1324499 | 307. 735 | 5600693. 586 |
| M341T518   | 341. 1380962 | 517. 762 | 12325848. 51 |
| M341T663   | 341. 1378347 | 663. 287 | 13469630. 08 |
| M341T688   | 341. 1372357 | 687. 95  | 20999614. 76 |
| M341T616   | 341. 136554  | 615. 594 | 8167123. 563 |
| M341T531   | 341. 1358817 | 531. 127 | 23188113. 03 |
| M341T604   | 341. 1364279 | 603. 95  | 28399330. 04 |
| M341T168   | 341. 1330994 | 167. 804 | 13555174. 77 |
| M341T488   | 341. 1377051 | 488. 437 | 12593351. 95 |
| M341T150   | 341. 1331279 | 149. 65  | 12391020. 92 |

|            |              |          |              |
|------------|--------------|----------|--------------|
| M341T320   | 341. 1329154 | 319. 758 | 9918005. 488 |
| M341T448   | 341. 1393996 | 447. 531 | 8134688. 918 |
| M341T306   | 341. 1440866 | 306. 247 | 7950070. 508 |
| M341T335   | 341. 1439579 | 334. 966 | 10248699. 72 |
| M341T191   | 341. 1454921 | 190. 962 | 6694370. 47  |
| M341T384   | 341. 1421974 | 383. 536 | 3664829. 969 |
| M341T351   | 341. 1535142 | 351. 348 | 1587941. 142 |
| M341T334   | 341. 1679403 | 333. 715 | 5992116. 231 |
| M341T375   | 341. 1806389 | 375. 021 | 8246394. 873 |
| M341T355_1 | 341. 1813672 | 355. 41  | 61138483. 35 |
| M341T393   | 341. 1806754 | 392. 715 | 3135847. 225 |
| M341T403   | 341. 1797279 | 403. 447 | 6308207. 176 |
| M341T297   | 341. 1901868 | 296. 739 | 1229280. 569 |
| M341T355_2 | 341. 2049866 | 355. 41  | 7565254. 348 |
| M341T367   | 341. 2054449 | 366. 514 | 17960874. 39 |
| M341T754   | 341. 2561347 | 753. 987 | 10052798. 32 |
| M341T669   | 341. 2811321 | 668. 867 | 4634249. 959 |
| M341T580   | 341. 2813855 | 580. 22  | 15461059. 93 |
| M341T562   | 341. 2816541 | 561. 955 | 43822700. 91 |
| M341T547   | 341. 2814582 | 546. 651 | 26750129. 63 |
| M341T682   | 341. 283021  | 681. 885 | 7076620. 219 |
| M341T623   | 341. 2830667 | 623. 11  | 13391377. 82 |
| M341T811   | 341. 3027511 | 811. 413 | 6166509. 386 |
| M341T803   | 341. 3029158 | 802. 88  | 5286089. 559 |
| M341T830   | 341. 3519738 | 830. 193 | 9434077. 661 |
| M342T409   | 341. 6382966 | 409. 271 | 1204397. 658 |
| M342T310   | 341. 6540435 | 310. 075 | 4924646. 892 |
| M342T345_1 | 341. 668315  | 344. 555 | 3384984. 115 |
| M342T321   | 341. 9993525 | 321. 198 | 13033319. 8  |
| M342T540   | 342. 0389608 | 539. 764 | 4120139. 519 |
| M342T398   | 342. 117337  | 397. 878 | 4553847. 399 |
| M342T309   | 342. 1350166 | 308. 967 | 47348575. 68 |
| M342T163   | 342. 1366709 | 162. 728 | 485836660. 6 |
| M342T263   | 342. 1366595 | 262. 529 | 223486154. 7 |
| M342T293   | 342. 1367085 | 292. 623 | 939749997. 2 |
| M342T87    | 342. 136647  | 86. 6643 | 1782045275   |
| M342T188_1 | 342. 1323224 | 188. 126 | 489818097. 8 |
| M342T442   | 342. 1320631 | 442. 005 | 781478. 6653 |
| M342T276   | 342. 1366415 | 276. 414 | 233148930. 6 |
| M342T119   | 342. 1396481 | 119. 433 | 709263842. 7 |
| M342T328   | 342. 1397453 | 328. 106 | 13520819. 51 |
| M342T649   | 342. 1381768 | 649. 338 | 15250002. 72 |
| M342T143   | 342. 1396331 | 142. 85  | 420856373. 8 |
| M342T210   | 342. 1431956 | 210. 186 | 114329330. 3 |
| M342T533   | 342. 1397606 | 532. 526 | 8293805. 279 |
| M342T703   | 342. 1403181 | 703. 35  | 7691866. 997 |
| M342T234   | 342. 1396681 | 234. 447 | 241402559. 6 |
| M342T107   | 342. 1395841 | 106. 513 | 2251829100   |
| M342T188_2 | 342. 1433701 | 188. 126 | 500321918. 3 |
| M342T379   | 342. 1517322 | 379. 194 | 9594373. 926 |
| M342T411   | 342. 153158  | 410. 542 | 16575653. 38 |
| M342T325   | 342. 1532458 | 325. 35  | 92810294. 85 |
| M342T345_2 | 342. 154897  | 344. 555 | 38859848. 91 |
| M342T295   | 342. 1532116 | 295. 356 | 61274668. 51 |

|            |              |          |              |
|------------|--------------|----------|--------------|
| M342T394   | 342. 1532399 | 393. 934 | 9811363. 706 |
| M342T173   | 342. 1545571 | 173. 407 | 17485587. 79 |
| M342T304   | 342. 1531939 | 303. 513 | 59203478. 06 |
| M342T423   | 342. 1544861 | 423. 199 | 25851630. 26 |
| M342T448_1 | 342. 1532409 | 447. 531 | 6546995. 716 |
| M342T318   | 342. 1645892 | 318. 497 | 4305148. 884 |
| M342T463   | 342. 1666292 | 463. 271 | 191024697. 4 |
| M342T355   | 342. 1834563 | 355. 41  | 8728872. 743 |
| M342T522   | 342. 2011189 | 522. 177 | 14629031. 42 |
| M342T510   | 342. 2008052 | 510. 333 | 3069857. 559 |
| M342T537   | 342. 2275008 | 536. 761 | 3996044. 579 |
| M342T497   | 342. 2379412 | 497. 214 | 9325704. 427 |
| M342T459   | 342. 2369559 | 458. 985 | 5991979. 387 |
| M342T746   | 342. 2401754 | 745. 603 | 2722105. 168 |
| M342T504   | 342. 2381255 | 504. 466 | 10037960. 47 |
| M342T448_2 | 342. 2371054 | 447. 531 | 4175178. 819 |
| M342T562   | 342. 2861051 | 561. 955 | 7764622. 678 |
| M343T169   | 342. 5662644 | 169. 221 | 5548865. 229 |
| M343T82    | 342. 8557351 | 82. 0569 | 37109968. 09 |
| M343T780   | 343. 0785585 | 780. 043 | 5722858. 979 |
| M343T176   | 343. 087169  | 175. 952 | 21310303. 47 |
| M343T524   | 343. 1021079 | 523. 735 | 3682249. 943 |
| M343T469   | 343. 1028892 | 469. 252 | 2771341. 323 |
| M343T481   | 343. 1148182 | 481. 042 | 5062558. 031 |
| M343T616   | 343. 1139315 | 615. 594 | 16384082. 17 |
| M343T446   | 343. 1201758 | 445. 984 | 1809048. 676 |
| M343T509   | 343. 1153737 | 508. 883 | 4812664. 128 |
| M343T101   | 343. 1216602 | 101. 161 | 55680634. 48 |
| M343T119_1 | 343. 121566  | 119. 433 | 6370293. 077 |
| M343T649_1 | 343. 1218117 | 649. 338 | 22606315. 62 |
| M343T243   | 343. 123553  | 242. 682 | 3660516. 316 |
| M343T94    | 343. 12211   | 93. 7378 | 39624260. 39 |
| M343T143_1 | 343. 1226545 | 142. 85  | 9762161. 358 |
| M343T209   | 343. 1236708 | 208. 905 | 6781556. 746 |
| M343T119_2 | 343. 1394958 | 119. 433 | 84359226. 52 |
| M343T163_1 | 343. 1393088 | 162. 728 | 58874259. 56 |
| M343T190   | 343. 1395243 | 189. 571 | 34741480. 69 |
| M343T293   | 343. 141183  | 292. 623 | 123724969. 5 |
| M343T180   | 343. 1396355 | 179. 75  | 33707460. 88 |
| M343T390   | 343. 1366802 | 390. 432 | 6604606. 763 |
| M343T143_2 | 343. 1393908 | 142. 85  | 54070449. 32 |
| M343T378   | 343. 1368244 | 377. 704 | 2695021. 416 |
| M343T87    | 343. 1390705 | 86. 6643 | 228823612. 3 |
| M343T107   | 343. 1395786 | 106. 513 | 284643025    |
| M343T325   | 343. 1554803 | 325. 35  | 18472115. 05 |
| M343T335   | 343. 1547186 | 334. 966 | 9160171. 242 |
| M343T345   | 343. 1548173 | 344. 555 | 7180472. 607 |
| M343T531   | 343. 1533844 | 531. 127 | 4116903. 329 |
| M343T614   | 343. 1509181 | 614. 215 | 12465612. 19 |
| M343T453   | 343. 1644466 | 453. 317 | 2150873. 985 |
| M343T163_2 | 343. 1585468 | 162. 728 | 9101177. 253 |
| M343T409   | 343. 1602648 | 409. 271 | 2970994. 427 |
| M343T110   | 343. 1596316 | 110. 047 | 4982956. 367 |
| M343T188   | 343. 1588491 | 188. 126 | 11504044. 58 |



|            |              |          |              |
|------------|--------------|----------|--------------|
| M343T423   | 343. 1603212 | 423. 199 | 3416415. 461 |
| M343T365   | 343. 1593859 | 365. 061 | 18665919. 47 |
| M343T301   | 343. 1593883 | 300. 782 | 22816853. 7  |
| M343T503   | 343. 1694195 | 503. 046 | 12648127. 79 |
| M343T463   | 343. 1705481 | 463. 271 | 37983789. 2  |
| M343T313   | 343. 1846798 | 312. 85  | 16522799     |
| M343T401   | 343. 1968322 | 400. 59  | 29725217. 26 |
| M343T362   | 343. 1989444 | 362. 146 | 10372053. 43 |
| M343T316   | 343. 1954168 | 315. 701 | 6410800. 493 |
| M343T570   | 343. 2586983 | 570. 01  | 3126939. 808 |
| M343T649_2 | 343. 296888  | 649. 338 | 14484009. 1  |
| M343T562   | 343. 2986674 | 561. 955 | 4747853. 243 |
| M343T703   | 343. 2975105 | 703. 35  | 8768006. 202 |
| M343T799   | 343. 3304397 | 799. 089 | 3149894. 47  |
| M344T386_1 | 343. 6292646 | 386. 352 | 4742106. 692 |
| M344T777   | 343. 6626892 | 777. 245 | 77876299. 37 |
| M344T329   | 343. 6736383 | 329. 481 | 8897935. 879 |
| M344T206   | 343. 9920214 | 205. 903 | 3386859. 326 |
| M344T119   | 344. 0851183 | 119. 433 | 9536115. 669 |
| M344T239   | 344. 0862131 | 238. 605 | 28236241. 24 |
| M344T152   | 344. 0850546 | 152. 375 | 33392343. 27 |
| M344T191   | 344. 0899255 | 190. 962 | 5857577. 208 |
| M344T608   | 344. 112167  | 608. 261 | 7195347. 468 |
| M344T155   | 344. 1183955 | 155. 197 | 3059478. 725 |
| M344T253   | 344. 1275358 | 253. 024 | 27559078. 29 |
| M344T280   | 344. 1274863 | 280. 345 | 11263408. 65 |
| M344T104   | 344. 1298382 | 104. 493 | 21569048. 66 |
| M344T219   | 344. 1296537 | 219. 233 | 523307098. 8 |
| M344T386_2 | 344. 1304211 | 386. 352 | 6834313. 79  |
| M344T429   | 344. 1351473 | 428. 735 | 3911242. 104 |
| M344T163   | 344. 1435305 | 162. 728 | 34447160. 8  |
| M344T314   | 344. 1447473 | 314. 259 | 9595899. 392 |
| M344T190   | 344. 1448224 | 189. 571 | 21884725. 61 |
| M344T180   | 344. 1448718 | 179. 75  | 10677438. 5  |
| M344T106   | 344. 1416841 | 105. 503 | 63759933. 36 |
| M344T86    | 344. 1435545 | 85. 6453 | 33384421. 89 |
| M344T291   | 344. 144665  | 291. 307 | 33077713. 81 |
| M344T143   | 344. 1433701 | 142. 85  | 16222314. 9  |
| M344T154   | 344. 1433587 | 153. 785 | 14966876. 57 |
| M344T131   | 344. 1432687 | 130. 668 | 8393968. 331 |
| M344T205   | 344. 1569664 | 204. 747 | 1595951. 17  |
| M344T365   | 344. 1623155 | 365. 061 | 2901904. 683 |
| M344T107   | 344. 1533397 | 106. 513 | 9587647. 322 |
| M344T272   | 344. 1683128 | 272. 304 | 7572945. 113 |
| M344T339   | 344. 1700075 | 339. 085 | 26289642. 45 |
| M344T316   | 344. 168586  | 315. 701 | 22174245. 33 |
| M344T308   | 344. 1743799 | 307. 735 | 14853283. 36 |
| M344T350   | 344. 174358  | 349. 911 | 13527029. 04 |
| M344T436   | 344. 185126  | 436. 069 | 46211918. 65 |
| M344T423   | 344. 179929  | 423. 199 | 7524739. 213 |
| M344T140   | 344. 1887903 | 140. 286 | 3945759. 72  |
| M344T348   | 344. 1882482 | 348. 488 | 846066. 4705 |
| M344T446   | 344. 1934703 | 445. 984 | 4047305. 285 |
| M344T403   | 344. 1987104 | 403. 447 | 3245698. 14  |

|            |              |          |              |
|------------|--------------|----------|--------------|
| M344T497   | 344. 2529871 | 497. 214 | 17002072. 93 |
| M344T516   | 344. 2530012 | 516. 214 | 28391064. 87 |
| M344T829   | 344. 2776792 | 828. 73  | 19019254. 87 |
| M344T792   | 344. 2820358 | 792. 146 | 2486271. 198 |
| M344T649   | 344. 3014987 | 649. 338 | 3446933. 371 |
| M344T804   | 344. 3137196 | 804. 327 | 4683449. 661 |
| M344T816   | 344. 3500372 | 815. 517 | 8663809. 964 |
| M344T826   | 344. 3500353 | 825. 74  | 9445221. 013 |
| M345T239   | 344. 5851954 | 238. 605 | 6809069. 808 |
| M345T152   | 344. 5881868 | 152. 375 | 7214718. 734 |
| M345T82    | 344. 8549255 | 82. 0569 | 8604213. 736 |
| M345T119   | 344. 9903624 | 119. 433 | 6490091. 209 |
| M345T113   | 344. 9902551 | 112. 781 | 4502866. 416 |
| M345T121   | 345. 0768375 | 120. 525 | 6299388. 926 |
| M345T144   | 345. 1013456 | 143. 959 | 21705181. 5  |
| M345T506   | 345. 1286524 | 505. 855 | 4812705. 613 |
| M345T192_1 | 345. 127767  | 192. 437 | 4482486. 419 |
| M345T388   | 345. 1336287 | 387. 763 | 1382260. 09  |
| M345T295   | 345. 1362598 | 295. 356 | 6091032. 218 |
| M345T471   | 345. 1361027 | 470. 602 | 883206. 5182 |
| M345T219   | 345. 1362419 | 219. 233 | 98076073. 41 |
| M345T311   | 345. 1635442 | 311. 445 | 4207206. 714 |
| M345T323   | 345. 1635716 | 322. 536 | 6405025. 386 |
| M345T455   | 345. 1645759 | 454. 739 | 5423901. 666 |
| M345T195   | 345. 1641586 | 195. 23  | 5873448. 134 |
| M345T484   | 345. 1672959 | 483. 973 | 11710405. 15 |
| M345T104   | 345. 1635487 | 104. 493 | 10843385. 6  |
| M345T572   | 345. 1678422 | 571. 523 | 4466208. 001 |
| M345T338   | 345. 1742395 | 337. 767 | 5934839. 566 |
| M345T583   | 345. 1680997 | 583. 068 | 20786382. 93 |
| M345T436   | 345. 1865787 | 436. 069 | 8488273. 799 |
| M345T502   | 345. 1879188 | 501. 549 | 1174725. 065 |
| M345T446   | 345. 1997165 | 445. 984 | 765038. 705  |
| M345T832   | 345. 201508  | 831. 709 | 2708646. 154 |
| M345T192_2 | 345. 201443  | 192. 437 | 3928852. 935 |
| M345T439   | 345. 2122273 | 439. 021 | 18617280. 08 |
| M345T429   | 345. 2122017 | 428. 735 | 16131847. 14 |
| M345T644   | 345. 2257731 | 643. 727 | 1512375. 338 |
| M346T789   | 345. 6017046 | 789. 293 | 17661621. 72 |
| M346T419   | 345. 7036782 | 418. 97  | 2418745. 491 |
| M346T788   | 345. 9394688 | 787. 856 | 9671036. 851 |
| M346T443   | 346. 024358  | 443. 256 | 7567142. 936 |
| M346T239   | 346. 053154  | 238. 605 | 86089437. 63 |
| M346T426   | 346. 1117967 | 425. 909 | 26781746. 99 |
| M346T310   | 346. 112719  | 310. 075 | 6005199. 901 |
| M346T448   | 346. 1264166 | 447. 531 | 3700146. 12  |
| M346T225   | 346. 1379589 | 224. 729 | 4765012. 762 |
| M346T215   | 346. 1379669 | 215. 068 | 4755251. 663 |
| M346T385   | 346. 1379164 | 385. 081 | 1998047. 443 |
| M346T317   | 346. 1391994 | 317. 199 | 7748106. 546 |
| M346T106   | 346. 1475739 | 105. 503 | 8547995. 914 |
| M346T328   | 346. 1509474 | 328. 106 | 29660123. 91 |
| M346T378   | 346. 1503273 | 377. 704 | 13467604. 47 |
| M346T223   | 346. 1598558 | 223. 474 | 31483484. 75 |

|          |              |          |              |
|----------|--------------|----------|--------------|
| M346T180 | 346. 1597727 | 179. 75  | 34798194. 61 |
| M346T250 | 346. 1598709 | 250. 144 | 22217838. 03 |
| M346T171 | 346. 1599074 | 170. 665 | 29914211. 29 |
| M346T445 | 346. 1638941 | 444. 725 | 1071154. 656 |
| M346T191 | 346. 1598833 | 190. 962 | 93845047. 55 |
| M346T148 | 346. 1597874 | 148. 117 | 62645218. 85 |
| M346T309 | 346. 1660184 | 308. 967 | 12692295. 97 |
| M346T294 | 346. 1659912 | 293. 896 | 9318156. 3   |
| M346T111 | 346. 1660906 | 111. 382 | 6560269. 373 |
| M346T320 | 346. 1657246 | 319. 758 | 7677848. 99  |
| M346T484 | 346. 1730663 | 483. 973 | 2870334. 844 |
| M346T422 | 346. 1873985 | 421. 784 | 1463283. 004 |
| M346T436 | 346. 1967056 | 436. 069 | 2621295. 338 |
| M346T449 | 346. 1965828 | 448. 978 | 9608525. 261 |
| M346T368 | 346. 1953176 | 367. 949 | 8624875. 139 |
| M346T354 | 346. 1954065 | 353. 978 | 8418260. 818 |
| M346T516 | 346. 2211627 | 516. 214 | 1295064. 409 |
| M346T475 | 346. 2295083 | 475. 007 | 3896020. 157 |
| M346T491 | 346. 2299971 | 491. 373 | 7394001. 699 |
| M346T614 | 346. 2368355 | 614. 215 | 1078133. 325 |
| M346T682 | 346. 2562586 | 681. 885 | 27760585. 98 |
| M346T694 | 346. 256216  | 693. 81  | 4895783. 434 |
| M346T739 | 346. 2706769 | 738. 697 | 25118536. 61 |
| M347T475 | 346. 5465147 | 475. 007 | 2983949. 206 |
| M347T484 | 346. 5950205 | 483. 973 | 1084340. 054 |
| M347T240 | 347. 0582139 | 239. 913 | 4659450. 518 |
| M347T119 | 347. 0949542 | 119. 433 | 131964137. 7 |
| M347T163 | 347. 0949787 | 162. 728 | 92368450. 43 |
| M347T293 | 347. 0919313 | 292. 623 | 155114546. 4 |
| M347T649 | 347. 0927347 | 649. 338 | 3748421. 205 |
| M347T143 | 347. 0949097 | 142. 85  | 53783102. 22 |
| M347T154 | 347. 0949779 | 153. 785 | 39172937. 38 |
| M347T703 | 347. 0934722 | 703. 35  | 4606054. 184 |
| M347T278 | 347. 0949802 | 277. 699 | 66979834. 25 |
| M347T209 | 347. 0950328 | 208. 905 | 18430592. 58 |
| M347T107 | 347. 0948957 | 106. 513 | 249294129. 3 |
| M347T188 | 347. 0972833 | 188. 126 | 53602721. 62 |
| M347T727 | 347. 1089005 | 726. 707 | 5453007. 126 |
| M347T477 | 347. 1118329 | 476. 554 | 6479059. 835 |
| M347T425 | 347. 1140426 | 424. 572 | 2873488. 415 |
| M347T81  | 347. 1179358 | 80. 824  | 6089385. 537 |
| M347T438 | 347. 1225955 | 437. 571 | 22414522. 08 |
| M347T423 | 347. 1305626 | 423. 199 | 2014766. 697 |
| M347T351 | 347. 1364863 | 351. 348 | 1398883. 592 |
| M347T318 | 347. 1428256 | 318. 497 | 6279250. 556 |
| M347T304 | 347. 1427891 | 303. 513 | 4274265. 367 |
| M347T229 | 347. 1543014 | 229. 059 | 22358220. 84 |
| M347T252 | 347. 1540096 | 251. 555 | 5088895. 906 |
| M347T275 | 347. 154102  | 274. 968 | 11960789. 54 |
| M347T104 | 347. 1524637 | 104. 493 | 14126230. 21 |
| M347T353 | 347. 1577221 | 352. 65  | 3561403. 765 |
| M347T478 | 347. 1685885 | 477. 989 | 5735983. 796 |
| M347T342 | 347. 1701389 | 341. 802 | 861117. 0067 |
| M347T426 | 347. 1685425 | 425. 909 | 5579014. 773 |

|            |              |          |              |
|------------|--------------|----------|--------------|
| M347T448   | 347. 1684707 | 447. 531 | 11473958. 31 |
| M347T439   | 347. 1823673 | 439. 021 | 1867120. 761 |
| M347T719   | 347. 183914  | 719. 215 | 9921779. 403 |
| M347T777   | 347. 1834335 | 777. 245 | 22274190. 53 |
| M347T361   | 347. 1802792 | 360. 794 | 9992362. 899 |
| M347T497   | 347. 1880483 | 497. 214 | 834460. 3014 |
| M347T338   | 347. 1907732 | 337. 767 | 9888769. 858 |
| M347T807   | 347. 2294523 | 807. 232 | 1837541. 479 |
| M347T718   | 347. 2420994 | 717. 959 | 3871706. 624 |
| M347T682   | 347. 2630902 | 681. 885 | 2701205. 586 |
| M348T719   | 347. 6872006 | 719. 215 | 2495862. 594 |
| M348T282   | 348. 0683399 | 281. 666 | 19285999. 15 |
| M348T107   | 348. 0907762 | 106. 513 | 27434587. 95 |
| M348T163   | 348. 0960925 | 162. 728 | 12121691. 8  |
| M348T293_1 | 348. 0965206 | 292. 623 | 21784118. 23 |
| M348T121   | 348. 0968286 | 120. 525 | 19152361. 13 |
| M348T278   | 348. 0965771 | 277. 699 | 9009642. 287 |
| M348T422   | 348. 1060408 | 421. 784 | 4798287. 351 |
| M348T187   | 348. 1261667 | 186. 709 | 7936780. 378 |
| M348T427   | 348. 1263406 | 427. 362 | 2670969. 22  |
| M348T90    | 348. 1276167 | 89. 6999 | 39764549. 61 |
| M348T438   | 348. 1261564 | 437. 571 | 4224481. 279 |
| M348T104_1 | 348. 1276516 | 104. 493 | 32311582. 31 |
| M348T212   | 348. 1414788 | 212. 448 | 1289945. 846 |
| M348T309   | 348. 1489845 | 308. 967 | 1192070. 825 |
| M348T516   | 348. 1638841 | 516. 214 | 8896635. 712 |
| M348T104_2 | 348. 1637645 | 104. 493 | 15377412. 91 |
| M348T448   | 348. 1735514 | 447. 531 | 1087315. 064 |
| M348T328   | 348. 1753297 | 328. 106 | 9427854. 704 |
| M348T293_2 | 348. 1753035 | 292. 623 | 6673697. 764 |
| M348T271   | 348. 1752586 | 270. 983 | 5216226. 793 |
| M348T108   | 348. 1751141 | 107. 537 | 2931677. 926 |
| M348T389   | 348. 1767496 | 389. 035 | 4627426. 446 |
| M348T339   | 348. 1752498 | 339. 085 | 16009687. 52 |
| M348T705   | 348. 271546  | 704. 715 | 251913792. 6 |
| M348T750   | 348. 2860073 | 749. 96  | 16187858. 55 |
| M348T731   | 348. 2852868 | 731. 347 | 8502605. 275 |
| M348T722   | 348. 2868488 | 722. 193 | 10563898. 62 |
| M349T211   | 349. 0072506 | 211. 288 | 1026819. 695 |
| M349T320   | 349. 0217877 | 319. 758 | 1959821. 36  |
| M349T279   | 349. 070195  | 279. 039 | 5305257. 958 |
| M349T327   | 349. 0728554 | 326. 78  | 27493919. 73 |
| M349T188   | 349. 0759171 | 188. 126 | 10316459. 44 |
| M349T429   | 349. 0865931 | 428. 735 | 1309133. 868 |
| M349T119   | 349. 1338529 | 119. 433 | 127544403. 1 |
| M349T143   | 349. 1338039 | 142. 85  | 121411782    |
| M349T155   | 349. 1338672 | 155. 197 | 391592664. 4 |
| M349T107   | 349. 1337301 | 106. 513 | 307291278    |
| M349T372   | 349. 1385914 | 372. 152 | 7268558. 297 |
| M349T388   | 349. 1386567 | 387. 763 | 13893743. 32 |
| M349T415   | 349. 1477763 | 414. 82  | 3866915. 471 |
| M349T427   | 349. 1477653 | 427. 362 | 11049575. 46 |
| M349T190   | 349. 1580048 | 189. 571 | 13196630. 99 |
| M349T86    | 349. 1615592 | 85. 6453 | 55214504. 57 |

|            |              |          |              |
|------------|--------------|----------|--------------|
| M349T531   | 349. 1622735 | 531. 127 | 3567391. 382 |
| M349T389   | 349. 1585135 | 389. 035 | 10519286. 35 |
| M349T331   | 349. 1602279 | 330. 809 | 52802231. 45 |
| M349T178   | 349. 1577623 | 178. 408 | 8484595. 083 |
| M349T343   | 349. 1747322 | 343. 226 | 4232716. 816 |
| M349T456   | 349. 1859101 | 456. 126 | 3440648. 594 |
| M349T430   | 349. 1829517 | 430. 131 | 5773987. 836 |
| M349T371   | 349. 184128  | 370. 777 | 9627103. 032 |
| M349T648   | 349. 2006124 | 648. 026 | 7376433. 192 |
| M349T316   | 349. 1956186 | 315. 701 | 2109536. 065 |
| M349T807   | 349. 2358784 | 807. 232 | 7203841. 581 |
| M349T705   | 349. 2792448 | 704. 715 | 47880923. 73 |
| M349T562   | 349. 2871127 | 561. 955 | 90647191. 33 |
| M350T116   | 349. 9915326 | 115. 522 | 1957076. 626 |
| M350T327   | 350. 0775644 | 326. 78  | 4267484. 632 |
| M350T436   | 350. 1213205 | 436. 069 | 20397971. 67 |
| M350T537   | 350. 1243799 | 536. 761 | 1457153. 967 |
| M350T406   | 350. 121258  | 406. 289 | 21034891. 03 |
| M350T143   | 350. 137746  | 142. 85  | 10514320. 04 |
| M350T110   | 350. 1358367 | 110. 047 | 41297786. 13 |
| M350T155   | 350. 1379069 | 155. 197 | 41890231. 97 |
| M350T388   | 350. 142871  | 387. 763 | 2878572. 727 |
| M350T291   | 350. 1447975 | 291. 307 | 6231238. 23  |
| M350T95    | 350. 1436901 | 94. 7467 | 11149559. 38 |
| M350T465   | 350. 1430127 | 464. 668 | 3121064. 169 |
| M350T331   | 350. 1417815 | 330. 809 | 7459457. 492 |
| M350T426   | 350. 1404528 | 425. 909 | 6158395. 232 |
| M350T374   | 350. 1579059 | 373. 532 | 3777540. 634 |
| M350T427   | 350. 1536951 | 427. 362 | 1132875. 524 |
| M350T458   | 350. 1721475 | 457. 576 | 10701490. 96 |
| M350T435_1 | 350. 1802987 | 434. 589 | 100330079. 4 |
| M350T398   | 350. 180248  | 397. 878 | 15245125. 54 |
| M350T106   | 350. 1794783 | 105. 503 | 8510315. 884 |
| M350T435_2 | 350. 1908171 | 434. 589 | 3918569. 38  |
| M350T531   | 350. 1958291 | 531. 127 | 470022356. 8 |
| M350T545   | 350. 1958947 | 545. 203 | 215992975. 7 |
| M350T708   | 350. 2199266 | 707. 557 | 7287406. 979 |
| M350T357   | 350. 2274945 | 356. 74  | 2064246. 735 |
| M350T445   | 350. 2348316 | 444. 725 | 7228644. 431 |
| M350T592   | 350. 231499  | 592. 067 | 18024424. 18 |
| M350T694   | 350. 2303968 | 693. 81  | 11003995. 96 |
| M350T462   | 350. 2518218 | 461. 845 | 2259312. 783 |
| M350T449   | 350. 2516398 | 448. 978 | 4377982. 25  |
| M350T798   | 350. 2525929 | 797. 773 | 2665041. 05  |
| M350T562   | 350. 2899186 | 561. 955 | 19944296     |
| M351T301   | 350. 6594694 | 300. 782 | 9481516. 204 |
| M351T709   | 350. 7215957 | 709. 106 | 2388614. 822 |
| M351T461   | 350. 8725354 | 460. 537 | 1645395. 524 |
| M351T321   | 351. 0152021 | 321. 198 | 17083752. 95 |
| M351T455   | 351. 1260455 | 454. 739 | 1861226. 046 |
| M351T406_1 | 351. 1257556 | 406. 289 | 2454978. 957 |
| M351T280   | 351. 1338083 | 280. 345 | 1068064. 356 |
| M351T154   | 351. 1401629 | 153. 785 | 6825072. 075 |
| M351T616   | 351. 1523389 | 615. 594 | 4784187. 084 |

|            |              |          |              |
|------------|--------------|----------|--------------|
| M351T89    | 351. 1494847 | 88. 6838 | 7110054. 521 |
| M351T311   | 351. 1531162 | 311. 445 | 10092258. 39 |
| M351T425   | 351. 1656472 | 424. 572 | 17286422. 6  |
| M351T406_2 | 351. 1654631 | 406. 289 | 14721924. 41 |
| M351T293   | 351. 1736486 | 292. 623 | 8428076. 485 |
| M351T143   | 351. 1733773 | 142. 85  | 14637098. 08 |
| M351T336   | 351. 1688898 | 336. 344 | 12874603. 91 |
| M351T198   | 351. 1751184 | 198. 072 | 36659565. 09 |
| M351T327   | 351. 1735377 | 326. 78  | 7798024. 974 |
| M351T108   | 351. 1759283 | 107. 537 | 6231055. 161 |
| M351T418   | 351. 177472  | 417. 676 | 123579170. 9 |
| M351T814   | 351. 1900437 | 814. 095 | 11052214. 12 |
| M351T433   | 351. 1884517 | 433. 111 | 13578725. 26 |
| M351T92    | 351. 1853768 | 91. 7174 | 115881418. 8 |
| M351T545   | 351. 1965985 | 545. 203 | 39315288. 41 |
| M351T531   | 351. 2017424 | 531. 127 | 78749818. 41 |
| M351T785   | 351. 2126083 | 785. 136 | 45956113. 19 |
| M351T682   | 351. 2125795 | 681. 885 | 74686595. 3  |
| M351T718   | 351. 2125473 | 717. 959 | 34058171. 49 |
| M351T458   | 351. 2110193 | 457. 576 | 5079799. 023 |
| M351T737   | 351. 2125288 | 737. 198 | 24547048. 4  |
| M351T811   | 351. 2510321 | 811. 413 | 5036620. 582 |
| M351T649   | 351. 3008075 | 649. 338 | 73333552. 19 |
| M351T660   | 351. 3015436 | 660. 455 | 24986931. 78 |
| M351T719   | 351. 303826  | 719. 215 | 16692434. 87 |
| M351T703   | 351. 3038557 | 703. 35  | 78240565. 7  |
| M351T734   | 351. 303808  | 734. 269 | 5785149. 941 |
| M352T458   | 351. 8596016 | 457. 576 | 745276. 9098 |
| M352T127   | 351. 9997039 | 126. 785 | 3949072. 859 |
| M352T321_1 | 352. 0190924 | 321. 198 | 3061440. 745 |
| M352T152   | 352. 0702213 | 152. 375 | 9899788. 014 |
| M352T237   | 352. 0720437 | 237. 171 | 8719656. 85  |
| M352T780   | 352. 0795016 | 780. 043 | 5351091. 065 |
| M352T445   | 352. 1002718 | 444. 725 | 939642. 0282 |
| M352T477   | 352. 1371549 | 476. 554 | 4663550. 583 |
| M352T345   | 352. 1373624 | 344. 555 | 12696175. 78 |
| M352T549   | 352. 137361  | 549. 375 | 3839397. 321 |
| M352T308   | 352. 1494053 | 307. 735 | 2473475. 131 |
| M352T398   | 352. 1492785 | 397. 878 | 5586940. 332 |
| M352T389   | 352. 1461566 | 389. 035 | 3513753. 763 |
| M352T321_2 | 352. 1461931 | 321. 198 | 1923923. 811 |
| M352T365   | 352. 1493458 | 365. 061 | 5620511. 627 |
| M352T381   | 352. 1526537 | 380. 63  | 9759530. 656 |
| M352T102   | 352. 158754  | 102. 247 | 70646406. 31 |
| M352T158   | 352. 1587247 | 157. 773 | 19546082. 11 |
| M352T190   | 352. 1586651 | 189. 571 | 36250310. 92 |
| M352T293   | 352. 1587717 | 292. 623 | 43790758. 56 |
| M352T207   | 352. 1588117 | 207. 393 | 33476145. 3  |
| M352T525   | 352. 1642075 | 525. 132 | 1124757. 254 |
| M352T425_1 | 352. 1836782 | 424. 572 | 40159612. 09 |
| M352T816   | 352. 1947833 | 815. 517 | 2513045. 892 |
| M352T425_2 | 352. 1946542 | 424. 572 | 2498246. 54  |
| M352T566   | 352. 2103952 | 565. 79  | 641964430. 2 |
| M352T559   | 352. 2104398 | 559. 459 | 416325380. 5 |

|            |              |          |              |
|------------|--------------|----------|--------------|
| M352T682   | 352. 2164288 | 681. 885 | 10947186. 8  |
| M352T551   | 352. 2103799 | 550. 919 | 280646877. 7 |
| M352T785   | 352. 2195888 | 785. 136 | 6582440. 399 |
| M352T718   | 352. 2206882 | 717. 959 | 3578457. 664 |
| M352T493   | 352. 2338679 | 492. 895 | 5701701. 281 |
| M352T833   | 352. 2457696 | 833. 029 | 8878631. 888 |
| M352T649   | 352. 3072054 | 649. 338 | 19938849. 85 |
| M352T660   | 352. 3073726 | 660. 455 | 6106395. 461 |
| M352T703   | 352. 3043092 | 703. 35  | 19991298. 54 |
| M352T719   | 352. 3084286 | 719. 215 | 4335229. 911 |
| M352T824   | 352. 3188619 | 824. 311 | 4654834. 112 |
| M353T493   | 352. 7338773 | 492. 895 | 2125880. 283 |
| M353T359   | 353. 0813326 | 359. 32  | 6015003. 585 |
| M353T144   | 353. 0896802 | 143. 959 | 162720037. 2 |
| M353T116   | 353. 0895889 | 115. 522 | 103646691. 8 |
| M353T276   | 353. 0905679 | 276. 414 | 3019417. 865 |
| M353T772   | 353. 0990436 | 772. 206 | 15091244. 73 |
| M353T299_1 | 353. 1067186 | 299. 493 | 2833737. 072 |
| M353T96    | 353. 1179372 | 95. 7572 | 100103515. 3 |
| M353T555   | 353. 1319736 | 555. 358 | 11867498. 63 |
| M353T309   | 353. 1329559 | 308. 967 | 3338918. 051 |
| M353T299_2 | 353. 1329526 | 299. 493 | 2731331. 909 |
| M353T443   | 353. 1338239 | 443. 256 | 32826635. 09 |
| M353T325   | 353. 1416488 | 325. 35  | 5071303. 076 |
| M353T336   | 353. 1447853 | 336. 344 | 5110368. 648 |
| M353T101   | 353. 153274  | 101. 161 | 36703917. 71 |
| M353T781   | 353. 1541995 | 781. 303 | 98381561. 61 |
| M353T207   | 353. 1606548 | 207. 393 | 2927668. 042 |
| M353T190   | 353. 1632615 | 189. 571 | 5778462. 288 |
| M353T291   | 353. 163569  | 291. 307 | 5612328. 891 |
| M353T347   | 353. 1692491 | 347. 175 | 4306019. 56  |
| M353T418   | 353. 1816923 | 417. 676 | 4041972. 381 |
| M353T565   | 353. 2132169 | 564. 534 | 235045129    |
| M353T705   | 353. 2281289 | 704. 715 | 444961332    |
| M353T754   | 353. 2281492 | 753. 987 | 92673778. 2  |
| M353T737   | 353. 2281194 | 737. 198 | 56884856. 65 |
| M353T838   | 353. 2669128 | 837. 524 | 26915819. 8  |
| M354T144   | 353. 5935802 | 143. 959 | 40063615. 8  |
| M354T116   | 353. 5935715 | 115. 522 | 24055135. 62 |
| M354T365   | 354. 0744664 | 365. 061 | 8323899. 702 |
| M354T122   | 354. 0853012 | 122. 007 | 2599409. 868 |
| M354T145   | 354. 0957489 | 145. 382 | 8308322. 007 |
| M354T104_1 | 354. 0998455 | 104. 493 | 14615673. 39 |
| M354T164   | 354. 101841  | 163. 846 | 7135980. 779 |
| M354T398   | 354. 1167827 | 397. 878 | 4778169. 025 |
| M354T415   | 354. 1167893 | 414. 82  | 3658594. 189 |
| M354T96    | 354. 1200521 | 95. 7572 | 10449281. 93 |
| M354T309   | 354. 1279421 | 308. 967 | 3208309. 085 |
| M354T104_2 | 354. 137358  | 104. 493 | 19292888. 36 |
| M354T478   | 354. 144594  | 477. 989 | 2281231. 907 |
| M354T323   | 354. 1389765 | 322. 536 | 1113201. 442 |
| M354T327   | 354. 1525281 | 326. 78  | 35697208. 32 |
| M354T348_1 | 354. 1517872 | 348. 488 | 141790111. 9 |
| M354T334_1 | 354. 1525525 | 333. 715 | 31317980. 99 |

|            |              |          |              |
|------------|--------------|----------|--------------|
| M354T409   | 354. 1642801 | 409. 271 | 2946440. 522 |
| M354T348_2 | 354. 1634566 | 348. 488 | 9389257. 365 |
| M354T399   | 354. 1642249 | 399. 046 | 2507031. 57  |
| M354T306   | 354. 1602397 | 306. 247 | 2724529. 938 |
| M354T334_2 | 354. 1674582 | 333. 715 | 4403669. 227 |
| M354T601   | 354. 1704581 | 601. 04  | 2275268. 307 |
| M354T343   | 354. 1770042 | 343. 226 | 2998175. 207 |
| M354T462   | 354. 1902301 | 461. 845 | 2643104. 786 |
| M354T496   | 354. 2110695 | 495. 779 | 2239352. 724 |
| M354T566   | 354. 2148127 | 565. 79  | 15550184     |
| M354T611   | 354. 224304  | 611. 145 | 3273349. 353 |
| M354T705_1 | 354. 2305344 | 704. 715 | 79833612. 44 |
| M354T705_2 | 354. 2623641 | 704. 715 | 5750662. 257 |
| M354T814   | 354. 2629684 | 814. 095 | 34886554. 61 |
| M354T813   | 354. 3144051 | 812. 862 | 1908643. 657 |
| M355T811   | 354. 9284304 | 811. 413 | 8874691. 757 |
| M355T32    | 354. 9285847 | 32. 4171 | 5402395. 007 |
| M355T823   | 354. 9285006 | 822. 881 | 9396817. 707 |
| M355T838   | 354. 9358734 | 837. 524 | 4578904. 426 |
| M355T398   | 355. 0428657 | 397. 878 | 4377118. 769 |
| M355T144   | 355. 0864833 | 143. 959 | 3941968. 067 |
| M355T388   | 355. 1049222 | 387. 763 | 8312019. 613 |
| M355T427   | 355. 1007767 | 427. 362 | 40945586. 38 |
| M355T487   | 355. 0995629 | 486. 885 | 3539493. 662 |
| M355T445   | 355. 1159168 | 444. 725 | 2221438. 867 |
| M355T475   | 355. 1250031 | 475. 007 | 11033601. 77 |
| M355T291   | 355. 1488219 | 291. 307 | 15521007. 42 |
| M355T169   | 355. 1485931 | 169. 221 | 9809831. 737 |
| M355T509   | 355. 1479006 | 508. 883 | 3001967. 276 |
| M355T318   | 355. 1484164 | 318. 497 | 13079268. 35 |
| M355T191   | 355. 1478417 | 190. 962 | 17154089. 36 |
| M355T304   | 355. 1486207 | 303. 513 | 8087502. 467 |
| M355T107   | 355. 1491682 | 106. 513 | 5257985. 913 |
| M355T338   | 355. 1515863 | 337. 767 | 9455635. 062 |
| M355T753   | 355. 1506972 | 752. 541 | 10730103. 06 |
| M355T348   | 355. 1611114 | 348. 488 | 24714575. 52 |
| M355T253   | 355. 1586156 | 253. 024 | 1867438. 965 |
| M355T538   | 355. 1722385 | 538. 316 | 5577052. 383 |
| M355T506   | 355. 1703235 | 505. 855 | 13465857. 96 |
| M355T528   | 355. 170338  | 528. 185 | 7929060. 915 |
| M355T477   | 355. 1864742 | 476. 554 | 4023837. 284 |
| M355T491   | 355. 186477  | 491. 373 | 2097417. 523 |
| M355T418   | 355. 1959475 | 417. 676 | 17758640. 93 |
| M355T341   | 355. 1959287 | 340. 548 | 4483695. 469 |
| M355T705   | 355. 2348382 | 704. 715 | 9472518. 582 |
| M355T310   | 355. 2365256 | 310. 075 | 3200638. 004 |
| M355T836   | 355. 2809512 | 836. 034 | 20406639. 18 |
| M355T462   | 355. 3016085 | 461. 845 | 7689762. 581 |
| M356T84    | 356. 0851302 | 83. 5661 | 6161981. 114 |
| M356T401   | 356. 0953074 | 400. 59  | 2298710. 141 |
| M356T427   | 356. 1054331 | 427. 362 | 6136841. 238 |
| M356T358   | 356. 1149168 | 357. 958 | 33636337. 2  |
| M356T332   | 356. 1272302 | 332. 2   | 11138619. 03 |
| M356T475   | 356. 132404  | 475. 007 | 4394631. 649 |



|            |              |          |              |
|------------|--------------|----------|--------------|
| M356T304   | 356. 1312055 | 303. 513 | 10432959. 62 |
| M356T399   | 356. 1327532 | 399. 046 | 4580381. 215 |
| M356T371   | 356. 1401441 | 370. 777 | 2443816. 334 |
| M356T223   | 356. 1431352 | 223. 474 | 7433782. 542 |
| M356T294   | 356. 1415102 | 293. 896 | 3069835. 366 |
| M356T176   | 356. 1431821 | 175. 952 | 12432054. 39 |
| M356T317   | 356. 1414923 | 317. 199 | 6437966. 096 |
| M356T97    | 356. 1525759 | 96. 7698 | 103072875. 2 |
| M356T305   | 356. 15021   | 304. 777 | 4846392. 04  |
| M356T528   | 356. 1791563 | 528. 185 | 4186443. 113 |
| M356T309   | 356. 1908907 | 308. 967 | 2915964. 367 |
| M356T381   | 356. 1892108 | 380. 63  | 23516743. 71 |
| M356T474   | 356. 2052479 | 473. 597 | 1162835. 549 |
| M356T695   | 356. 2237758 | 695. 155 | 2762906. 154 |
| M356T584   | 356. 242641  | 584. 417 | 10401666. 44 |
| M356T804   | 356. 2772533 | 804. 327 | 4829123. 524 |
| M356T836   | 356. 284492  | 836. 034 | 5046879. 418 |
| M357T381   | 356. 6964814 | 380. 63  | 6431891. 688 |
| M357T659   | 357. 0834836 | 658. 953 | 29958543. 47 |
| M357T804   | 357. 0947763 | 804. 327 | 9184589. 602 |
| M357T548   | 357. 1146691 | 548. 114 | 17852523. 62 |
| M357T456   | 357. 1171731 | 456. 126 | 11190349. 4  |
| M357T449_1 | 357. 1171688 | 448. 978 | 11314509. 28 |
| M357T595   | 357. 1171992 | 595. 066 | 6073873. 771 |
| M357T608   | 357. 1171035 | 608. 261 | 13844936. 84 |
| M357T188   | 357. 1283388 | 188. 126 | 1901035. 842 |
| M357T660   | 357. 1316392 | 660. 455 | 3187564. 508 |
| M357T446   | 357. 1369388 | 445. 984 | 2227156. 388 |
| M357T547   | 357. 1310256 | 546. 651 | 11821699. 05 |
| M357T468   | 357. 1321287 | 467. 706 | 8366695. 912 |
| M357T683   | 357. 1676058 | 683. 436 | 30176519. 42 |
| M357T673   | 357. 1675103 | 672. 956 | 110728655. 9 |
| M357T104   | 357. 162768  | 104. 493 | 9325881. 663 |
| M357T582   | 357. 1690685 | 581. 625 | 36705243. 5  |
| M357T743   | 357. 1690369 | 742. 68  | 35146059. 7  |
| M357T336   | 357. 173289  | 336. 344 | 4367273. 59  |
| M357T346   | 357. 1732166 | 345. 848 | 5020173. 132 |
| M357T780   | 357. 1713038 | 780. 043 | 7012146. 868 |
| M357T297   | 357. 1772463 | 296. 739 | 11874473. 67 |
| M357T620   | 357. 1883901 | 620. 172 | 2556221. 253 |
| M357T530   | 357. 1884116 | 529. 713 | 5001908. 474 |
| M357T350   | 357. 2027673 | 349. 911 | 3531840. 013 |
| M357T358   | 357. 2028532 | 357. 958 | 4279792. 19  |
| M357T372   | 357. 2120202 | 372. 152 | 8198089. 924 |
| M357T512   | 357. 2110981 | 511. 77  | 10247355. 46 |
| M357T341   | 357. 2122633 | 340. 548 | 3813882. 143 |
| M357T321   | 357. 2128773 | 321. 198 | 6720409. 433 |
| M357T816   | 357. 2251732 | 815. 517 | 11890186. 8  |
| M357T449_2 | 357. 2753413 | 448. 978 | 7753765. 382 |
| M358T167   | 357. 5521137 | 166. 613 | 37784794. 62 |
| M358T513   | 357. 7148173 | 513. 285 | 3913995. 025 |
| M358T176   | 358. 0085519 | 175. 952 | 3460243. 858 |
| M358T168   | 358. 055803  | 167. 804 | 11301165. 92 |
| M358T659   | 358. 0822651 | 658. 953 | 4656579. 677 |

|            |              |          |              |
|------------|--------------|----------|--------------|
| M358T101   | 358. 1331013 | 101. 161 | 3985137. 071 |
| M358T113   | 358. 1320795 | 112. 781 | 5320022. 07  |
| M358T293   | 358. 1483512 | 292. 623 | 7739321. 594 |
| M358T336   | 358. 1612872 | 336. 344 | 6023295. 251 |
| M358T93    | 358. 157885  | 92. 7272 | 14718726. 19 |
| M358T582   | 358. 169999  | 581. 625 | 8298727. 535 |
| M358T320   | 358. 1691494 | 319. 758 | 1448218. 959 |
| M358T104   | 358. 1676173 | 104. 493 | 9173403. 402 |
| M358T381   | 358. 1868397 | 380. 63  | 2025810. 051 |
| M358T427   | 358. 1980675 | 427. 362 | 3075660. 632 |
| M358T512   | 358. 2140094 | 511. 77  | 5198932. 888 |
| M358T813   | 358. 2565769 | 812. 862 | 47146737. 71 |
| M358T537   | 358. 2671721 | 536. 761 | 13241826. 89 |
| M358T449   | 358. 2797787 | 448. 978 | 2350083. 243 |
| M358T814   | 358. 2929395 | 814. 095 | 4362938. 995 |
| M358T773   | 358. 2933854 | 773. 437 | 5207061. 909 |
| M359T510   | 358. 7150526 | 510. 333 | 1382795. 241 |
| M359T82    | 358. 8370414 | 82. 0569 | 93628631. 88 |
| M359T122   | 359. 008444  | 122. 007 | 4307087. 52  |
| M359T111   | 359. 0062355 | 111. 382 | 3333709. 895 |
| M359T210   | 359. 0442663 | 210. 186 | 1287993. 588 |
| M359T119   | 359. 0901752 | 119. 433 | 2855968. 762 |
| M359T126   | 359. 089991  | 125. 598 | 5028874. 089 |
| M359T175   | 359. 0885667 | 174. 865 | 14256444. 28 |
| M359T332   | 359. 1441692 | 332. 2   | 4076012. 298 |
| M359T534   | 359. 1475944 | 533. 958 | 14359623. 49 |
| M359T106   | 359. 1442549 | 105. 503 | 8280441. 466 |
| M359T552   | 359. 1459248 | 552. 452 | 7237865. 852 |
| M359T310   | 359. 1522243 | 310. 075 | 14590515. 58 |
| M359T320   | 359. 1523891 | 319. 758 | 12458270. 03 |
| M359T299   | 359. 1522294 | 299. 493 | 24970295. 89 |
| M359T335   | 359. 1571681 | 334. 966 | 2599759. 778 |
| M359T469_1 | 359. 169964  | 469. 252 | 4440549. 796 |
| M359T767   | 359. 1819376 | 766. 742 | 7124634. 715 |
| M359T830_1 | 359. 1821802 | 830. 193 | 4989254. 073 |
| M359T773   | 359. 1821456 | 773. 437 | 3921606. 338 |
| M359T491   | 359. 1797513 | 491. 373 | 2312443. 956 |
| M359T357   | 359. 1799347 | 356. 74  | 20976562. 15 |
| M359T644   | 359. 1862873 | 643. 727 | 2802763. 169 |
| M359T636   | 359. 1868352 | 636. 473 | 6022015. 137 |
| M359T245   | 359. 1903547 | 245. 199 | 6517426. 109 |
| M359T321   | 359. 192505  | 321. 198 | 6609612. 048 |
| M359T212   | 359. 1999098 | 212. 448 | 5638392. 607 |
| M359T354   | 359. 2059824 | 353. 978 | 877072. 0887 |
| M359T329   | 359. 2201121 | 329. 481 | 6620766. 379 |
| M359T469_2 | 359. 2270942 | 469. 252 | 6434139. 259 |
| M359T395   | 359. 2257321 | 395. 264 | 9501873. 842 |
| M359T478   | 359. 2271482 | 477. 989 | 9737150. 244 |
| M359T830_2 | 359. 2306578 | 830. 193 | 721468. 3684 |
| M359T237   | 359. 2378827 | 237. 171 | 3882039. 562 |
| M359T821   | 359. 2575193 | 821. 334 | 3664542. 359 |
| M359T813   | 359. 2602019 | 812. 862 | 8844571. 396 |
| M360T475   | 359. 5743036 | 475. 007 | 2991800. 807 |
| M360T82    | 359. 8426803 | 82. 0569 | 2137227. 018 |

|            |              |          |              |
|------------|--------------|----------|--------------|
| M360T354   | 359. 8753989 | 353. 978 | 1602948. 147 |
| M360T496   | 360. 1064239 | 495. 779 | 7988570. 807 |
| M360T478   | 360. 1063619 | 477. 989 | 5043292. 931 |
| M360T101_1 | 360. 1366537 | 101. 161 | 35825737. 44 |
| M360T143_1 | 360. 1365717 | 142. 85  | 4620178. 264 |
| M360T111_1 | 360. 1364394 | 111. 382 | 11336243. 99 |
| M360T412_1 | 360. 1411161 | 411. 838 | 5351481. 735 |
| M360T401   | 360. 1427575 | 400. 59  | 5737287. 436 |
| M360T101_2 | 360. 1484522 | 101. 161 | 731942868. 9 |
| M360T95    | 360. 1484371 | 94. 7467 | 1098179150   |
| M360T163   | 360. 148519  | 162. 728 | 81258827. 34 |
| M360T180   | 360. 1484406 | 179. 75  | 18669844. 53 |
| M360T649   | 360. 1492452 | 649. 338 | 422347910. 7 |
| M360T291   | 360. 1484494 | 291. 307 | 25758660. 94 |
| M360T143_2 | 360. 1485856 | 142. 85  | 52947036. 35 |
| M360T210   | 360. 1484663 | 210. 186 | 16138243. 83 |
| M360T719   | 360. 148962  | 719. 215 | 38350466. 1  |
| M360T111_2 | 360. 1484067 | 111. 382 | 207892403. 6 |
| M360T632   | 360. 1492192 | 631. 982 | 50940636. 2  |
| M360T191   | 360. 1484718 | 190. 962 | 28157528. 84 |
| M360T122   | 360. 1589949 | 122. 007 | 54026159. 92 |
| M360T372   | 360. 1617298 | 372. 152 | 4455655. 009 |
| M360T309   | 360. 1652834 | 308. 967 | 111669905. 6 |
| M360T206   | 360. 1655853 | 205. 903 | 43034299. 85 |
| M360T223   | 360. 1655417 | 223. 474 | 75228073. 15 |
| M360T294   | 360. 1654725 | 293. 896 | 70283930. 94 |
| M360T274   | 360. 1655227 | 273. 531 | 46440375. 74 |
| M360T106   | 360. 1654882 | 105. 503 | 244926952. 1 |
| M360T160   | 360. 1655494 | 160. 369 | 172375043. 6 |
| M360T239   | 360. 1655226 | 238. 605 | 90948179. 04 |
| M360T425   | 360. 164555  | 424. 572 | 6230312. 822 |
| M360T190   | 360. 1686017 | 189. 571 | 25249477. 85 |
| M360T469   | 360. 1742558 | 469. 252 | 687447. 9364 |
| M360T260   | 360. 1684579 | 259. 74  | 33129316. 44 |
| M360T306   | 360. 1859322 | 306. 247 | 7483400. 509 |
| M360T334   | 360. 1833118 | 333. 715 | 3545910. 962 |
| M360T412_2 | 360. 2099432 | 411. 838 | 11161120. 2  |
| M360T402   | 360. 209623  | 401. 963 | 10719509. 53 |
| M360T761   | 360. 2861997 | 760. 916 | 20503130. 43 |
| M360T792_1 | 360. 2862442 | 792. 146 | 12398782. 19 |
| M360T811   | 360. 2902414 | 811. 413 | 25620035. 99 |
| M360T785   | 360. 3443726 | 785. 136 | 7935483. 914 |
| M360T792_2 | 360. 3444423 | 792. 146 | 14030212. 81 |
| M360T800   | 360. 3445698 | 800. 484 | 43850069     |
| M361T82    | 360. 8298392 | 82. 0569 | 36293792. 76 |
| M361T145   | 361. 0772548 | 145. 382 | 58397173. 14 |
| M361T110_1 | 361. 0773732 | 110. 047 | 21139961. 56 |
| M361T466   | 361. 0875899 | 466. 162 | 2892018. 293 |
| M361T426   | 361. 0906158 | 425. 909 | 5419707. 331 |
| M361T440   | 361. 0992086 | 440. 459 | 31169928. 17 |
| M361T522   | 361. 1372428 | 522. 177 | 3393138. 862 |
| M361T415   | 361. 1372881 | 414. 82  | 2102962. 066 |
| M361T555   | 361. 1376476 | 555. 358 | 3622528. 208 |
| M361T101   | 361. 1490965 | 101. 161 | 75813749. 64 |

|            |              |          |              |
|------------|--------------|----------|--------------|
| M361T95    | 361. 1491342 | 94. 7467 | 110310760. 4 |
| M361T719   | 361. 1497376 | 719. 215 | 4599331. 792 |
| M361T490   | 361. 1443067 | 489. 826 | 1493939. 974 |
| M361T144_1 | 361. 151088  | 143. 959 | 2913711. 125 |
| M361T649   | 361. 1521409 | 649. 338 | 58634715. 34 |
| M361T111   | 361. 151181  | 111. 382 | 21549624. 68 |
| M361T582   | 361. 1617751 | 581. 625 | 10013890. 43 |
| M361T531   | 361. 1651857 | 531. 127 | 6143897. 408 |
| M361T339   | 361. 1585572 | 339. 085 | 5011121. 66  |
| M361T331   | 361. 158582  | 330. 809 | 4533393. 225 |
| M361T240   | 361. 1641357 | 239. 913 | 8510932. 906 |
| M361T375   | 361. 1716205 | 375. 021 | 22287050. 45 |
| M361T161   | 361. 1664728 | 161. 494 | 16558400. 5  |
| M361T144_2 | 361. 1683473 | 143. 959 | 10534130. 95 |
| M361T106   | 361. 1684777 | 105. 503 | 48857021. 94 |
| M361T297   | 361. 1698766 | 296. 739 | 14256230. 49 |
| M361T364   | 361. 1716042 | 363. 58  | 18841437. 51 |
| M361T329   | 361. 1699358 | 329. 481 | 39223486. 57 |
| M361T670   | 361. 1757042 | 670. 166 | 1741241. 145 |
| M361T110_2 | 361. 1945796 | 110. 047 | 33849820. 67 |
| M361T152   | 361. 1934985 | 152. 375 | 15266232. 97 |
| M361T439   | 361. 1952131 | 439. 021 | 6854111. 898 |
| M361T668   | 361. 1954793 | 667. 609 | 2033215. 595 |
| M361T811   | 361. 2325023 | 811. 413 | 4726264. 944 |
| M361T754   | 361. 2317501 | 753. 987 | 11209640. 14 |
| M361T762   | 361. 2334055 | 762. 439 | 5317104. 547 |
| M362T144_1 | 361. 5771889 | 143. 959 | 13574151. 69 |
| M362T32    | 361. 5917462 | 32. 4171 | 3355069. 575 |
| M362T126   | 361. 992366  | 125. 598 | 3636430. 003 |
| M362T218   | 362. 0136519 | 217. 866 | 3142850. 927 |
| M362T144_2 | 362. 0773694 | 143. 959 | 7006408. 216 |
| M362T101   | 362. 0950978 | 101. 161 | 23853712. 84 |
| M362T135   | 362. 0950472 | 134. 574 | 5213064. 307 |
| M362T113   | 362. 0950305 | 112. 781 | 15696510. 3  |
| M362T412   | 362. 1198896 | 411. 838 | 13106813. 56 |
| M362T440   | 362. 1201373 | 440. 459 | 5157687. 207 |
| M362T463   | 362. 1217467 | 463. 271 | 8130135. 141 |
| M362T788   | 362. 1295309 | 787. 856 | 18326047. 58 |
| M362T385   | 362. 1257997 | 385. 081 | 10264942. 26 |
| M362T99    | 362. 1422438 | 98. 9918 | 9268523. 585 |
| M362T104   | 362. 1418911 | 104. 493 | 20739107. 04 |
| M362T164   | 362. 141891  | 163. 846 | 6962240. 089 |
| M362T143   | 362. 1419072 | 142. 85  | 7324514. 663 |
| M362T192   | 362. 1426672 | 192. 437 | 13296301. 95 |
| M362T295   | 362. 1423042 | 295. 356 | 8930174. 127 |
| M362T649   | 362. 1520141 | 649. 338 | 10655825. 68 |
| M362T211   | 362. 1540447 | 211. 288 | 14308623. 8  |
| M362T96    | 362. 1560033 | 95. 7572 | 39713105. 72 |
| M362T375   | 362. 1718976 | 375. 021 | 2037687. 263 |
| M362T311   | 362. 1794058 | 311. 445 | 4023079. 018 |
| M362T106   | 362. 1794113 | 105. 503 | 20019403. 13 |
| M362T466   | 362. 1794329 | 466. 162 | 14760546. 91 |
| M362T263   | 362. 1908495 | 262. 529 | 2874486. 484 |
| M362T357   | 362. 1901023 | 356. 74  | 34163264. 04 |

|            |              |          |              |
|------------|--------------|----------|--------------|
| M362T469   | 362. 210377  | 469. 252 | 13137086. 71 |
| M362T490   | 362. 2105549 | 489. 826 | 9299408. 44  |
| M362T582   | 362. 2531099 | 581. 625 | 5088884. 217 |
| M362T796   | 362. 2934528 | 796. 474 | 85193537. 34 |
| M362T754   | 362. 3044986 | 753. 987 | 94246047. 12 |
| M362T747   | 362. 3229417 | 746. 977 | 4790788. 315 |
| M363T32    | 362. 5923572 | 32. 4171 | 1440236. 85  |
| M363T123   | 362. 9994986 | 123. 262 | 13071852. 99 |
| M363T111   | 362. 9995155 | 111. 382 | 3819070. 981 |
| M363T163   | 363. 0653199 | 162. 728 | 20081821. 79 |
| M363T293   | 363. 0658337 | 292. 623 | 26909290. 25 |
| M363T143   | 363. 0660943 | 142. 85  | 11023037. 42 |
| M363T278   | 363. 0660426 | 277. 699 | 11399505. 06 |
| M363T104   | 363. 0709756 | 104. 493 | 134102120. 1 |
| M363T426   | 363. 1036962 | 425. 909 | 845733. 5343 |
| M363T788   | 363. 1315985 | 787. 856 | 2851991. 102 |
| M363T148   | 363. 1365991 | 148. 117 | 6049073. 165 |
| M363T354   | 363. 1381808 | 353. 978 | 5726342. 002 |
| M363T478   | 363. 1644395 | 477. 989 | 2659816. 464 |
| M363T378_1 | 363. 163718  | 377. 704 | 18299705. 16 |
| M363T394   | 363. 1636455 | 393. 934 | 5500222. 378 |
| M363T393   | 363. 1751369 | 392. 715 | 34557130. 89 |
| M363T378_2 | 363. 1752021 | 377. 704 | 1076076600   |
| M363T586   | 363. 1775379 | 585. 968 | 9383319. 924 |
| M363T567   | 363. 1776723 | 567. 1   | 9199737. 447 |
| M363T316   | 363. 1857424 | 315. 701 | 1260239. 738 |
| M363T358   | 363. 194373  | 357. 958 | 4584167. 388 |
| M363T798   | 363. 2990348 | 797. 773 | 12834666. 81 |
| M364T39    | 363. 8949463 | 39. 4128 | 1551150. 052 |
| M364T195   | 364. 0636716 | 195. 23  | 15155074. 75 |
| M364T301   | 364. 0616168 | 300. 782 | 9011362. 667 |
| M364T459   | 364. 1012607 | 458. 985 | 2625905. 672 |
| M364T381   | 364. 1042345 | 380. 63  | 870437. 9515 |
| M364T741   | 364. 1205373 | 741. 302 | 4376311. 005 |
| M364T435   | 364. 1360362 | 434. 589 | 4922277. 219 |
| M364T362   | 364. 1419306 | 362. 146 | 4192684. 58  |
| M364T325   | 364. 1478257 | 325. 35  | 4089491. 955 |
| M364T401   | 364. 1477022 | 400. 59  | 8616511. 463 |
| M364T316   | 364. 1489745 | 315. 701 | 3018092. 267 |
| M364T448   | 364. 157082  | 447. 531 | 5813175. 243 |
| M364T104   | 364. 1586243 | 104. 493 | 16298578. 01 |
| M364T378   | 364. 1804229 | 377. 704 | 181372592. 4 |
| M364T482   | 364. 1979492 | 482. 436 | 24648916. 88 |
| M364T497   | 364. 2196621 | 497. 214 | 6266303. 192 |
| M364T430   | 364. 2204332 | 430. 131 | 1557901. 648 |
| M364T604   | 364. 2448734 | 603. 95  | 5010683. 357 |
| M364T698   | 364. 2425309 | 697. 952 | 35961592. 81 |
| M364T491   | 364. 2465795 | 491. 373 | 586996. 0548 |
| M364T715   | 364. 2824681 | 715. 011 | 4348176. 448 |
| M364T813   | 364. 3182952 | 812. 862 | 2240547. 819 |
| M365T430   | 364. 548457  | 430. 131 | 2282244. 491 |
| M365T331   | 365. 0695326 | 330. 809 | 3221878. 248 |
| M365T324_1 | 365. 0692117 | 323. 984 | 4603145. 793 |
| M365T274   | 365. 0971059 | 273. 531 | 4769383. 911 |

|            |              |          |              |
|------------|--------------|----------|--------------|
| M365T719   | 365. 1020429 | 719. 215 | 6884108. 962 |
| M365T111   | 365. 102683  | 111. 382 | 88246801. 61 |
| M365T101_1 | 365. 1027527 | 101. 161 | 314118287. 8 |
| M365T163   | 365. 1028543 | 162. 728 | 21084740. 95 |
| M365T565   | 365. 1037019 | 564. 534 | 3609791. 098 |
| M365T94    | 365. 102746  | 93. 7378 | 171495594. 9 |
| M365T143   | 365. 1086506 | 142. 85  | 37835964. 36 |
| M365T651   | 365. 1044004 | 650. 898 | 269628384    |
| M365T683   | 365. 1043456 | 683. 436 | 7546998. 762 |
| M365T545   | 365. 1039863 | 545. 203 | 3579433. 203 |
| M365T439   | 365. 130964  | 439. 021 | 3238252. 739 |
| M365T327   | 365. 1329131 | 326. 78  | 3396786. 369 |
| M365T374   | 365. 144087  | 373. 532 | 2111423. 254 |
| M365T104   | 365. 1630625 | 104. 493 | 14725277. 72 |
| M365T392   | 365. 1807761 | 391. 678 | 53302747. 78 |
| M365T348   | 365. 1805912 | 348. 488 | 6242225. 796 |
| M365T455   | 365. 1811371 | 454. 739 | 9945148. 308 |
| M365T378   | 365. 1810931 | 377. 704 | 26089290. 6  |
| M365T423   | 365. 1799569 | 423. 199 | 45891703. 19 |
| M365T332   | 365. 1922635 | 332. 2   | 12193614. 8  |
| M365T522   | 365. 1921649 | 522. 177 | 3511922. 336 |
| M365T371   | 365. 1925985 | 370. 777 | 8669203. 254 |
| M365T364   | 365. 1917435 | 363. 58  | 8792009. 744 |
| M365T676   | 365. 191158  | 675. 866 | 6293762. 96  |
| M365T504   | 365. 1921704 | 504. 466 | 627391185. 5 |
| M365T324_2 | 365. 1875725 | 323. 984 | 7640156. 476 |
| M365T351   | 365. 1918137 | 351. 348 | 3510799. 029 |
| M365T753   | 365. 1930403 | 752. 541 | 2189478. 348 |
| M365T456   | 365. 2063005 | 456. 126 | 5873261. 624 |
| M365T101_2 | 365. 2013292 | 101. 161 | 6849219. 171 |
| M365T531   | 365. 2850692 | 531. 127 | 2475752. 304 |
| M365T562   | 365. 3172137 | 561. 955 | 52113739. 04 |
| M366T821   | 366. 045972  | 821. 334 | 7224542. 939 |
| M366T608   | 366. 0933459 | 608. 261 | 2410018. 581 |
| M366T101_1 | 366. 1071466 | 101. 161 | 40226449. 38 |
| M366T308   | 366. 1004505 | 307. 735 | 24543118. 13 |
| M366T93    | 366. 1072924 | 92. 7272 | 23683295. 83 |
| M366T295   | 366. 1016513 | 295. 356 | 6227649. 641 |
| M366T113   | 366. 1058354 | 112. 781 | 10774426. 01 |
| M366T327   | 366. 1056082 | 326. 78  | 34534724. 33 |
| M366T651   | 366. 1079652 | 650. 898 | 28539947     |
| M366T101_2 | 366. 1364924 | 101. 161 | 38009510. 75 |
| M366T160   | 366. 1376567 | 160. 369 | 4232784. 987 |
| M366T649   | 366. 1389027 | 649. 338 | 8404684. 755 |
| M366T580   | 366. 1537534 | 580. 22  | 2262928. 372 |
| M366T386   | 366. 1537539 | 386. 352 | 4226349. 193 |
| M366T403   | 366. 1687277 | 403. 447 | 6024351. 506 |
| M366T432   | 366. 1770941 | 431. 64  | 3177970. 334 |
| M366T103   | 366. 175822  | 103. 423 | 6205513. 118 |
| M366T392   | 366. 1859226 | 391. 678 | 6894079. 39  |
| M366T409   | 366. 1835563 | 409. 271 | 995155. 9517 |
| M366T478   | 366. 1865847 | 477. 989 | 36694435. 01 |
| M366T496_1 | 366. 1920159 | 495. 779 | 24130880. 28 |
| M366T504   | 366. 1923681 | 504. 466 | 85696215. 01 |

|            |              |          |              |
|------------|--------------|----------|--------------|
| M366T465   | 366. 2011573 | 464. 668 | 6619653. 387 |
| M366T445   | 366. 2011171 | 444. 725 | 4469808. 076 |
| M366T521   | 366. 2070301 | 520. 739 | 3136040. 22  |
| M366T456   | 366. 212737  | 456. 126 | 4676887. 198 |
| M366T362   | 366. 2156004 | 362. 146 | 1489858. 937 |
| M366T603   | 366. 223452  | 602. 513 | 22115404. 46 |
| M366T563   | 366. 3225191 | 563. 297 | 11786642. 25 |
| M366T496_2 | 366. 4229208 | 495. 779 | 4076313. 996 |
| M367T331   | 366. 6827352 | 330. 809 | 1515844. 061 |
| M367T176   | 367. 020438  | 175. 952 | 25705188. 35 |
| M367T535   | 367. 0801383 | 535. 329 | 1225492. 687 |
| M367T229   | 367. 0851004 | 229. 059 | 3369346. 581 |
| M367T274   | 367. 0857279 | 273. 531 | 4956679. 047 |
| M367T190   | 367. 0866284 | 189. 571 | 3218777. 152 |
| M367T287   | 367. 0860147 | 287. 148 | 20042783. 94 |
| M367T314   | 367. 0933063 | 314. 259 | 958772. 7601 |
| M367T426   | 367. 0999713 | 425. 909 | 1746716. 658 |
| M367T327   | 367. 1050325 | 326. 78  | 4345506. 011 |
| M367T806   | 367. 1147933 | 805. 823 | 4846459. 002 |
| M367T685   | 367. 1200774 | 684. 985 | 9488329. 203 |
| M367T306_1 | 367. 1216643 | 306. 247 | 2271415. 402 |
| M367T316   | 367. 1217834 | 315. 701 | 2942529. 891 |
| M367T101   | 367. 1333622 | 101. 161 | 13788018. 75 |
| M367T412   | 367. 1476532 | 411. 838 | 17308390. 95 |
| M367T388   | 367. 1475501 | 387. 763 | 252665912. 9 |
| M367T295   | 367. 1525643 | 295. 356 | 1561336. 963 |
| M367T365_1 | 367. 1525752 | 365. 061 | 19312071. 91 |
| M367T409   | 367. 1598518 | 409. 271 | 5574753. 712 |
| M367T346   | 367. 1600093 | 345. 848 | 27912225. 5  |
| M367T313   | 367. 1650409 | 312. 85  | 5247020. 199 |
| M367T306_2 | 367. 165503  | 306. 247 | 3412721. 356 |
| M367T389   | 367. 1654181 | 389. 035 | 6578653. 29  |
| M367T365_2 | 367. 1645674 | 365. 061 | 5025866. 336 |
| M367T104   | 367. 168364  | 104. 493 | 26211500. 99 |
| M367T207   | 367. 1745042 | 207. 393 | 2206612. 058 |
| M367T480   | 367. 1893296 | 479. 527 | 8896259. 054 |
| M367T504   | 367. 1985982 | 504. 466 | 11821714. 35 |
| M367T324   | 367. 1965116 | 323. 984 | 2011498. 839 |
| M367T669_1 | 367. 2066999 | 668. 867 | 9888641. 3   |
| M367T310   | 367. 2093549 | 310. 075 | 1645773. 518 |
| M367T620   | 367. 2082437 | 620. 172 | 22449913. 1  |
| M367T594   | 367. 207911  | 593. 62  | 4196800. 738 |
| M367T642   | 367. 2076083 | 642. 211 | 8304662. 442 |
| M367T737   | 367. 207539  | 737. 198 | 5337566. 367 |
| M367T652   | 367. 2057313 | 651. 956 | 7848282. 763 |
| M367T573   | 367. 2076051 | 573. 072 | 2822134. 116 |
| M367T583   | 367. 2076554 | 583. 068 | 6458818. 528 |
| M367T603   | 367. 2332759 | 602. 513 | 3509738. 827 |
| M367T814   | 367. 2447242 | 814. 095 | 9183226. 489 |
| M367T780   | 367. 2435806 | 780. 043 | 2409522. 985 |
| M367T666   | 367. 2676906 | 666. 137 | 3578035. 239 |
| M367T669_2 | 367. 2968702 | 668. 867 | 35948473. 74 |
| M367T682   | 367. 296813  | 681. 885 | 24640972. 08 |
| M367T702   | 367. 2960903 | 702. 055 | 18341218. 82 |

|            |              |          |              |
|------------|--------------|----------|--------------|
| M367T562   | 367. 2985708 | 561. 955 | 481042417. 8 |
| M367T545   | 367. 2985873 | 545. 203 | 226217056. 7 |
| M367T694   | 367. 2960555 | 693. 81  | 15749938     |
| M367T576   | 367. 2984901 | 575. 878 | 21689768. 24 |
| M367T588   | 367. 2986063 | 587. 521 | 12005481. 56 |
| M367T649   | 367. 3336336 | 649. 338 | 8652480. 372 |
| M367T660   | 367. 3336159 | 660. 455 | 1257949. 922 |
| M367T830   | 367. 3356024 | 830. 193 | 3233826. 905 |
| M367T703   | 367. 3336142 | 703. 35  | 10172370. 09 |
| M367T463   | 367. 4204174 | 463. 271 | 1068313. 685 |
| M368T719_1 | 367. 7022333 | 719. 215 | 6385978. 401 |
| M368T390   | 367. 9437395 | 390. 432 | 4857495. 396 |
| M368T127   | 367. 9713172 | 126. 785 | 1558491. 335 |
| M368T121   | 368. 0765742 | 120. 525 | 4464604. 593 |
| M368T353   | 368. 0931985 | 352. 65  | 8448322. 058 |
| M368T339   | 368. 1319675 | 339. 085 | 22107427. 83 |
| M368T371   | 368. 1319331 | 370. 777 | 8508387. 912 |
| M368T327   | 368. 132007  | 326. 78  | 9999691. 233 |
| M368T335   | 368. 1432592 | 334. 966 | 4955315. 597 |
| M368T323   | 368. 1436732 | 322. 536 | 2348210. 646 |
| M368T346   | 368. 1429069 | 345. 848 | 5801151. 213 |
| M368T359   | 368. 14327   | 359. 32  | 3687510. 066 |
| M368T191   | 368. 1463337 | 190. 962 | 4579464. 036 |
| M368T158   | 368. 1520849 | 157. 773 | 8497275. 28  |
| M368T293   | 368. 1546151 | 292. 623 | 11299854. 39 |
| M368T388   | 368. 1523034 | 387. 763 | 43888174. 82 |
| M368T88    | 368. 153017  | 87. 6739 | 31190214. 84 |
| M368T143   | 368. 1554553 | 142. 85  | 7959680. 083 |
| M368T104   | 368. 1557188 | 104. 493 | 60918001. 68 |
| M368T491   | 368. 1627427 | 491. 373 | 4674259. 82  |
| M368T362   | 368. 169534  | 362. 146 | 3489495. 177 |
| M368T372   | 368. 1704336 | 372. 152 | 4478300. 993 |
| M368T638   | 368. 1772999 | 637. 996 | 989270. 4776 |
| M368T395   | 368. 1712423 | 395. 264 | 3463571. 248 |
| M368T332   | 368. 1816197 | 332. 2   | 1433061. 019 |
| M368T386   | 368. 1846    | 386. 352 | 2254881. 21  |
| M368T389   | 368. 1961101 | 389. 035 | 4569955. 75  |
| M368T719_2 | 368. 2024987 | 719. 215 | 3913270. 466 |
| M368T589   | 368. 2061822 | 589. 053 | 2375586. 878 |
| M368T516   | 368. 2127733 | 516. 214 | 8473108. 272 |
| M368T419   | 368. 2248031 | 418. 97  | 3405901. 208 |
| M368T562   | 368. 301908  | 561. 955 | 137832542. 1 |
| M368T545   | 368. 3020544 | 545. 203 | 58671533. 05 |
| M369T453   | 368. 6720614 | 453. 317 | 1179800. 752 |
| M369T719_1 | 368. 7003451 | 719. 215 | 4281873. 353 |
| M369T385   | 368. 7056939 | 385. 081 | 985215. 6791 |
| M369T144   | 369. 0287255 | 143. 959 | 7753676. 049 |
| M369T183   | 369. 0271398 | 182. 574 | 6337445. 994 |
| M369T158   | 369. 028727  | 157. 773 | 6383532. 504 |
| M369T278   | 369. 0294475 | 277. 699 | 16322018. 59 |
| M369T482   | 369. 1157118 | 482. 436 | 6775690. 136 |
| M369T709   | 369. 1299062 | 709. 106 | 7453435. 04  |
| M369T219   | 369. 1277911 | 219. 233 | 3292256. 665 |
| M369T339   | 369. 1354363 | 339. 085 | 3935617. 294 |



|            |              |          |              |
|------------|--------------|----------|--------------|
| M369T773   | 369. 1346156 | 773. 437 | 11099338. 14 |
| M369T751   | 369. 1447407 | 751. 333 | 1708320. 524 |
| M369T503   | 369. 1487806 | 503. 046 | 7049077. 885 |
| M369T386   | 369. 1550276 | 386. 352 | 5781900. 085 |
| M369T329   | 369. 1623774 | 329. 481 | 8114302. 436 |
| M369T415   | 369. 1749391 | 414. 82  | 3813197. 38  |
| M369T396_1 | 369. 1749185 | 396. 415 | 8053690. 014 |
| M369T452   | 369. 1796604 | 451. 804 | 889943. 7194 |
| M369T582   | 369. 1901123 | 581. 625 | 11124465. 1  |
| M369T705   | 369. 2002372 | 704. 715 | 20749336. 22 |
| M369T461   | 369. 2109239 | 460. 537 | 7614544. 555 |
| M369T469   | 369. 2111337 | 469. 252 | 12339983. 1  |
| M369T516   | 369. 2058451 | 516. 214 | 7800040. 488 |
| M369T396_2 | 369. 2196253 | 396. 415 | 5706942. 508 |
| M369T563   | 369. 2262174 | 563. 297 | 5950851. 922 |
| M369T649_1 | 369. 2263156 | 649. 338 | 27647746. 87 |
| M369T719_2 | 369. 2233708 | 719. 215 | 17869060. 5  |
| M369T703_1 | 369. 2231332 | 703. 35  | 30642785. 85 |
| M369T632   | 369. 2229422 | 631. 982 | 6577844. 805 |
| M369T788   | 369. 2608614 | 787. 856 | 4059057. 565 |
| M369T669   | 369. 2621805 | 668. 867 | 7584941. 49  |
| M369T562   | 369. 3046028 | 561. 955 | 11600036. 59 |
| M369T649_2 | 369. 3137545 | 649. 338 | 86508609. 81 |
| M369T719_3 | 369. 3146138 | 719. 215 | 6148878. 76  |
| M369T703_2 | 369. 3145594 | 703. 35  | 72220368. 3  |
| M369T807   | 369. 3440352 | 807. 232 | 8357047. 705 |
| M370T206   | 370. 0537167 | 205. 903 | 2804520. 394 |
| M370T286   | 370. 1132679 | 285. 9   | 7762614. 12  |
| M370T372   | 370. 1490409 | 372. 152 | 16714619. 04 |
| M370T516   | 370. 1479464 | 516. 214 | 3390789. 268 |
| M370T260   | 370. 148989  | 259. 74  | 5550650. 912 |
| M370T169   | 370. 1484016 | 169. 221 | 2239348. 13  |
| M370T342   | 370. 1481563 | 341. 802 | 4910984. 225 |
| M370T317   | 370. 1479804 | 317. 199 | 7598625. 41  |
| M370T353   | 370. 1621581 | 352. 65  | 4805012. 548 |
| M370T190_1 | 370. 1617839 | 189. 571 | 37137299. 23 |
| M370T199   | 370. 1616131 | 199. 43  | 28779292. 74 |
| M370T119   | 370. 1700667 | 119. 433 | 255507466. 2 |
| M370T223   | 370. 1700778 | 223. 474 | 47488591. 64 |
| M370T293   | 370. 1701766 | 292. 623 | 225110183. 5 |
| M370T241   | 370. 1700118 | 241. 368 | 30035848. 65 |
| M370T180   | 370. 1701472 | 179. 75  | 74000200. 84 |
| M370T390   | 370. 1659912 | 390. 432 | 8464169. 282 |
| M370T106   | 370. 1700258 | 105. 503 | 535591554. 7 |
| M370T143   | 370. 1700372 | 142. 85  | 116375478. 8 |
| M370T258   | 370. 1701235 | 258. 489 | 39285711. 04 |
| M370T210   | 370. 1701141 | 210. 186 | 80874274. 8  |
| M370T171   | 370. 1700238 | 170. 665 | 57148593. 5  |
| M370T93    | 370. 169925  | 92. 7272 | 104252381. 2 |
| M370T278   | 370. 1701498 | 277. 699 | 84989341. 1  |
| M370T155   | 370. 1700901 | 155. 197 | 159496965. 6 |
| M370T573   | 370. 1679271 | 573. 072 | 6701008. 99  |
| M370T327   | 370. 1701946 | 326. 78  | 14257469. 72 |
| M370T188   | 370. 1734293 | 188. 126 | 91985419. 81 |

|            |              |          |              |
|------------|--------------|----------|--------------|
| M370T785   | 370. 1986562 | 785. 136 | 3250767. 989 |
| M370T190_2 | 370. 2072064 | 189. 571 | 1986009. 728 |
| M370T818   | 370. 2208272 | 818. 418 | 6245236. 611 |
| M370T649_1 | 370. 2284421 | 649. 338 | 4590458. 658 |
| M370T757   | 370. 2723556 | 757. 001 | 37314365. 82 |
| M370T703   | 370. 3150912 | 703. 35  | 16935275. 97 |
| M370T649_2 | 370. 3159961 | 649. 338 | 20939674. 67 |
| M370T807   | 370. 3482346 | 807. 232 | 2574756. 98  |
| M371T124   | 371. 0098959 | 124. 487 | 3967577. 24  |
| M371T308   | 371. 0562912 | 307. 735 | 9291333. 732 |
| M371T325   | 371. 0565785 | 325. 35  | 17937193. 3  |
| M371T747   | 371. 088279  | 746. 977 | 6291788. 332 |
| M371T764   | 371. 1099194 | 763. 856 | 8166023. 785 |
| M371T751   | 371. 1099422 | 751. 333 | 68880928. 2  |
| M371T773   | 371. 1090545 | 773. 437 | 1410187. 639 |
| M371T788   | 371. 1472363 | 787. 856 | 2814316. 817 |
| M371T708   | 371. 1454847 | 707. 557 | 27827526. 89 |
| M371T274   | 371. 1471739 | 273. 531 | 1278652. 514 |
| M371T221   | 371. 1429924 | 220. 676 | 2691737. 312 |
| M371T676   | 371. 1471363 | 675. 866 | 12730230. 96 |
| M371T104_1 | 371. 1437962 | 104. 493 | 3765721. 822 |
| M371T597   | 371. 1472148 | 596. 628 | 6135770. 33  |
| M371T215   | 371. 1540178 | 215. 068 | 2933366. 353 |
| M371T311   | 371. 1543059 | 311. 445 | 7129898. 066 |
| M371T253   | 371. 1539417 | 253. 024 | 9139856. 983 |
| M371T653   | 371. 1479332 | 653. 147 | 7762286. 693 |
| M371T456   | 371. 1651118 | 456. 126 | 13147412. 71 |
| M371T522   | 371. 1650052 | 522. 177 | 3802587. 767 |
| M371T158   | 371. 1749838 | 157. 773 | 22372721. 85 |
| M371T293   | 371. 171916  | 292. 623 | 32511568. 72 |
| M371T143   | 371. 1726857 | 142. 85  | 15756576. 06 |
| M371T210   | 371. 172699  | 210. 186 | 9626570. 813 |
| M371T93    | 371. 1724926 | 92. 7272 | 12905352. 44 |
| M371T278   | 371. 1718307 | 277. 699 | 13412524. 01 |
| M371T104_2 | 371. 1726984 | 104. 493 | 84363414. 54 |
| M371T626   | 371. 182754  | 626. 042 | 31607735. 15 |
| M371T446   | 371. 2253046 | 445. 984 | 5198690. 216 |
| M371T757   | 371. 275186  | 757. 001 | 9319508. 63  |
| M371T39    | 371. 3125618 | 39. 4128 | 2392264. 491 |
| M371T45    | 371. 3127028 | 45. 3435 | 3394684. 877 |
| M371T31    | 371. 3162757 | 31. 4047 | 2086844. 043 |
| M371T65    | 371. 3159495 | 64. 6213 | 6181211. 981 |
| M372T403_1 | 371. 5098403 | 403. 447 | 5044107. 069 |
| M372T453   | 371. 7011712 | 453. 317 | 751236. 8134 |
| M372T403_2 | 371. 8449631 | 403. 447 | 3170122. 195 |
| M372T75    | 371. 9563726 | 74. 9588 | 6397681. 021 |
| M372T150   | 372. 0673949 | 149. 65  | 1250065. 15  |
| M372T747   | 372. 0924908 | 746. 977 | 1794580. 019 |
| M372T59    | 372. 0992474 | 58. 6151 | 4754235. 83  |
| M372T161   | 372. 1103222 | 161. 494 | 315499255. 3 |
| M372T122   | 372. 1101695 | 122. 007 | 24324870. 17 |
| M372T207   | 372. 1103502 | 207. 393 | 7989894. 981 |
| M372T111   | 372. 1102391 | 111. 382 | 22216485. 72 |
| M372T317   | 372. 1366435 | 317. 199 | 8120548. 697 |

|            |              |          |              |
|------------|--------------|----------|--------------|
| M372T225   | 372. 1384438 | 224. 729 | 1484769. 966 |
| M372T446   | 372. 1420993 | 445. 984 | 1287194. 918 |
| M372T195   | 372. 1477336 | 195. 23  | 2878004. 875 |
| M372T427   | 372. 1638872 | 427. 362 | 2100142. 997 |
| M372T316   | 372. 1646521 | 315. 701 | 12078770. 36 |
| M372T358   | 372. 1615796 | 357. 958 | 5610918. 698 |
| M372T293   | 372. 1740674 | 292. 623 | 5023931. 457 |
| M372T106   | 372. 1736497 | 105. 503 | 14061057. 43 |
| M372T626   | 372. 185313  | 626. 042 | 7758816. 674 |
| M372T221   | 372. 1858962 | 220. 676 | 2574904. 183 |
| M372T403_3 | 372. 2077943 | 403. 447 | 4112276. 34  |
| M372T784   | 372. 2234982 | 783. 78  | 4974362. 998 |
| M372T430   | 372. 2534764 | 430. 131 | 5784691. 425 |
| M372T736   | 372. 2516453 | 735. 7   | 1667024. 691 |
| M372T682   | 372. 2721023 | 681. 885 | 3048055. 468 |
| M372T827   | 372. 3076714 | 827. 271 | 2415952. 128 |
| M373T403   | 372. 5428431 | 403. 447 | 2793824. 943 |
| M373T443   | 372. 7021751 | 443. 256 | 4599110. 81  |
| M373T158   | 373. 1172333 | 157. 773 | 39841231. 44 |
| M373T617   | 373. 1249815 | 617. 133 | 6248341. 979 |
| M373T669   | 373. 1259967 | 668. 867 | 7746431. 246 |
| M373T547   | 373. 126885  | 546. 651 | 7555964. 514 |
| M373T751   | 373. 1208675 | 751. 333 | 2046006. 377 |
| M373T445_1 | 373. 1236116 | 444. 725 | 15221810     |
| M373T521   | 373. 1266867 | 520. 739 | 23534991. 86 |
| M373T608   | 373. 1302603 | 608. 261 | 1711935. 565 |
| M373T445_2 | 373. 1360321 | 444. 725 | 2736245. 561 |
| M373T493   | 373. 1488286 | 492. 895 | 1745406. 312 |
| M373T701   | 373. 1634114 | 700. 758 | 103330146. 7 |
| M373T594   | 373. 1616619 | 593. 62  | 33931067. 52 |
| M373T613   | 373. 1617359 | 612. 699 | 56308224. 73 |
| M373T719   | 373. 1633149 | 719. 215 | 9601364. 06  |
| M373T731   | 373. 1592662 | 731. 347 | 4515455. 737 |
| M373T342   | 373. 1584011 | 341. 802 | 11822295. 62 |
| M373T104   | 373. 1590466 | 104. 493 | 21507654. 25 |
| M373T329   | 373. 1711797 | 329. 481 | 4576231. 875 |
| M373T310   | 373. 1710444 | 310. 075 | 12036702. 74 |
| M373T419   | 373. 1784161 | 418. 97  | 9472468. 801 |
| M373T103   | 373. 1711348 | 103. 423 | 7761309. 271 |
| M373T430   | 373. 1823564 | 430. 131 | 4056907. 53  |
| M373T461   | 373. 1825299 | 460. 537 | 2548317. 612 |
| M373T445_3 | 373. 1850027 | 444. 725 | 4651177. 905 |
| M373T519   | 373. 1911336 | 519. 257 | 821300. 4424 |
| M373T381   | 373. 1942302 | 380. 63  | 2352698. 135 |
| M373T784   | 373. 2005562 | 783. 78  | 3343472. 772 |
| M373T384   | 373. 2398981 | 383. 536 | 4632375. 043 |
| M374T260   | 374. 0152349 | 259. 74  | 626876. 5828 |
| M374T334   | 374. 1041645 | 333. 715 | 8453684. 47  |
| M374T272   | 374. 116359  | 272. 304 | 1910026. 651 |
| M374T104   | 374. 1198708 | 104. 493 | 5253342. 833 |
| M374T445   | 374. 1302449 | 444. 725 | 4197936. 597 |
| M374T106   | 374. 1413821 | 105. 503 | 12006268. 33 |
| M374T159   | 374. 1524826 | 159. 017 | 4899511. 471 |
| M374T144   | 374. 1583645 | 143. 959 | 7320118. 588 |

|            |              |          |              |
|------------|--------------|----------|--------------|
| M374T295   | 374. 1566174 | 295. 356 | 17600268. 67 |
| M374T316   | 374. 1566411 | 315. 701 | 18922097. 33 |
| M374T701   | 374. 1661703 | 700. 758 | 23110664. 65 |
| M374T594   | 374. 1645206 | 593. 62  | 6330688. 894 |
| M374T673   | 374. 1727141 | 672. 956 | 2181517. 915 |
| M374T613   | 374. 1703189 | 612. 699 | 8816457. 538 |
| M374T474   | 374. 1792588 | 473. 597 | 2922690. 749 |
| M374T463   | 374. 1789712 | 463. 271 | 14720865. 96 |
| M374T518   | 374. 2163614 | 517. 762 | 972840. 4066 |
| M374T682   | 374. 287181  | 681. 885 | 25565802. 58 |
| M375T369   | 374. 5526714 | 369. 321 | 3189051. 454 |
| M375T413   | 374. 7125496 | 413. 295 | 1332194. 331 |
| M375T82    | 374. 8036771 | 82. 0569 | 74919549. 36 |
| M375T659   | 375. 0876157 | 658. 953 | 24780838. 32 |
| M375T652   | 375. 0962725 | 651. 956 | 11741877. 25 |
| M375T776   | 375. 1048257 | 776. 194 | 4594020. 617 |
| M375T390   | 375. 121428  | 390. 432 | 7818441. 995 |
| M375T528   | 375. 1273671 | 528. 185 | 3107970. 455 |
| M375T597   | 375. 1256081 | 596. 628 | 8586981. 964 |
| M375T161   | 375. 1376437 | 161. 494 | 4064943. 861 |
| M375T294   | 375. 1376431 | 293. 896 | 3823992. 971 |
| M375T106   | 375. 1376136 | 105. 503 | 9584016. 599 |
| M375T604   | 375. 1314453 | 603. 95  | 2597047. 811 |
| M375T143   | 375. 1374303 | 142. 85  | 10257036. 23 |
| M375T219   | 375. 1376428 | 219. 233 | 4408096. 71  |
| M375T584   | 375. 1437092 | 584. 417 | 6905021. 445 |
| M375T471   | 375. 1427264 | 470. 602 | 2503356. 757 |
| M375T418   | 375. 156439  | 417. 676 | 2114365. 945 |
| M375T99    | 375. 1747522 | 98. 9918 | 16925278. 01 |
| M375T582   | 375. 1770088 | 581. 625 | 16174418. 05 |
| M375T682_1 | 375. 1772759 | 681. 885 | 9503109. 554 |
| M375T673   | 375. 1772723 | 672. 956 | 30187541. 65 |
| M375T341   | 375. 1858559 | 340. 548 | 2745548. 668 |
| M375T92    | 375. 1885621 | 91. 7174 | 3632925. 866 |
| M375T321   | 375. 1858667 | 321. 198 | 11434736. 17 |
| M375T518   | 375. 199756  | 517. 762 | 1484714. 645 |
| M375T436   | 375. 2002248 | 436. 069 | 2059481. 569 |
| M375T452   | 375. 2003209 | 451. 804 | 1479924. 885 |
| M375T445   | 375. 1985671 | 444. 725 | 3134125. 041 |
| M375T310   | 375. 2098947 | 310. 075 | 32848196. 98 |
| M375T298   | 375. 2100241 | 298. 135 | 30238357. 85 |
| M375T427   | 375. 2199464 | 427. 362 | 3505849. 357 |
| M375T202   | 375. 2222257 | 202. 149 | 688834. 7406 |
| M375T682_2 | 375. 2910594 | 681. 885 | 1914922. 343 |
| M376T81    | 375. 8189622 | 80. 824  | 1606079. 061 |
| M376T442   | 376. 1000575 | 442. 005 | 1740785. 074 |
| M376T423   | 376. 1597527 | 423. 199 | 3999252. 679 |
| M376T304   | 376. 1578428 | 303. 513 | 15334269. 8  |
| M376T104   | 376. 1605433 | 104. 493 | 30689500. 41 |
| M376T332   | 376. 1698364 | 332. 2   | 9598204. 976 |
| M376T398   | 376. 1699223 | 397. 878 | 2123919. 62  |
| M376T171   | 376. 1681286 | 170. 665 | 11787378. 14 |
| M376T347   | 376. 1700902 | 347. 175 | 5247572. 379 |
| M376T301   | 376. 1699332 | 300. 782 | 8312586. 183 |

|            |              |          |              |
|------------|--------------|----------|--------------|
| M376T107   | 376. 1716283 | 106. 513 | 7269005. 767 |
| M376T582   | 376. 1821731 | 581. 625 | 2966959. 822 |
| M376T533   | 376. 2227862 | 532. 526 | 5232069. 13  |
| M376T515   | 376. 2216455 | 514. 727 | 8888673. 597 |
| M376T705   | 376. 3031626 | 704. 715 | 50694186. 8  |
| M376T768   | 376. 341169  | 768. 166 | 1642533. 765 |
| M377T452_1 | 376. 665206  | 451. 804 | 5813532. 661 |
| M377T163   | 377. 0650698 | 162. 728 | 89452676. 8  |
| M377T111   | 377. 0693777 | 111. 382 | 7215362. 966 |
| M377T426   | 377. 083808  | 425. 909 | 2519437. 709 |
| M377T451   | 377. 1438266 | 450. 503 | 13165622. 85 |
| M377T183   | 377. 1544601 | 182. 574 | 9396311. 477 |
| M377T301   | 377. 1526917 | 300. 782 | 6919237. 205 |
| M377T422   | 377. 1578383 | 421. 784 | 1161496. 83  |
| M377T452_2 | 377. 1692335 | 451. 804 | 2606727. 308 |
| M377T90    | 377. 1678619 | 89. 6999 | 26397557. 26 |
| M377T455   | 377. 1804267 | 454. 739 | 19164082. 48 |
| M377T342   | 377. 1909576 | 341. 802 | 25678871. 6  |
| M377T364   | 377. 190813  | 363. 58  | 5806994. 853 |
| M377T771   | 377. 1927733 | 771. 042 | 8629401. 229 |
| M377T764   | 377. 2057266 | 763. 856 | 1551459. 697 |
| M377T459   | 377. 2010873 | 458. 985 | 535687. 9601 |
| M377T446   | 377. 2152567 | 445. 984 | 19783646. 49 |
| M378T525_1 | 377. 7123925 | 525. 132 | 10604929. 35 |
| M378T446   | 377. 720003  | 445. 984 | 4696448. 257 |
| M378T279   | 378. 0224414 | 279. 039 | 8741803. 407 |
| M378T168   | 378. 1000503 | 167. 804 | 6171496. 357 |
| M378T156   | 378. 0999692 | 156. 393 | 6581193. 437 |
| M378T90    | 378. 1148334 | 89. 6999 | 14561292. 3  |
| M378T401   | 378. 1155499 | 400. 59  | 8507500. 247 |
| M378T381   | 378. 1161122 | 380. 63  | 36314700. 53 |
| M378T272   | 378. 1371394 | 272. 304 | 3283303. 102 |
| M378T104_1 | 378. 137503  | 104. 493 | 16294885. 86 |
| M378T143_1 | 378. 1377488 | 142. 85  | 10084595. 6  |
| M378T137   | 378. 1515656 | 137. 373 | 3898718. 734 |
| M378T522   | 378. 1505655 | 522. 177 | 4053565. 196 |
| M378T451   | 378. 1477128 | 450. 503 | 1781929. 565 |
| M378T412   | 378. 1514642 | 411. 838 | 1489562. 37  |
| M378T376   | 378. 1457501 | 376. 409 | 1802244. 041 |
| M378T351   | 378. 1671771 | 351. 348 | 3975986. 338 |
| M378T537   | 378. 1608699 | 536. 761 | 898353. 7781 |
| M378T309   | 378. 1731161 | 308. 967 | 7721606. 88  |
| M378T472   | 378. 1679162 | 472. 132 | 4038735. 885 |
| M378T500   | 378. 1741816 | 500. 045 | 1290309. 331 |
| M378T143_2 | 378. 174147  | 142. 85  | 45368038. 83 |
| M378T95    | 378. 174083  | 94. 7467 | 207262601. 2 |
| M378T195   | 378. 1741907 | 195. 23  | 28927417. 96 |
| M378T104_2 | 378. 1741137 | 104. 493 | 327761679. 2 |
| M378T342   | 378. 1933205 | 341. 802 | 2061034. 103 |
| M378T405   | 378. 2026575 | 404. 872 | 2262506. 159 |
| M378T525_2 | 378. 2122348 | 525. 132 | 47229050. 88 |
| M378T525_3 | 378. 2366328 | 525. 132 | 10222089. 39 |
| M378T496   | 378. 2474211 | 495. 779 | 3171027. 217 |
| M378T554   | 378. 247422  | 553. 936 | 18243798. 19 |

|            |              |          |              |
|------------|--------------|----------|--------------|
| M378T509   | 378. 2474539 | 508. 883 | 4321639. 719 |
| M378T527   | 378. 2473615 | 526. 676 | 4024660. 42  |
| M378T724   | 378. 263052  | 723. 682 | 11417783. 02 |
| M379T279   | 379. 0302122 | 279. 039 | 4840737. 927 |
| M379T318   | 379. 0983149 | 318. 497 | 3158325. 936 |
| M379T426_1 | 379. 1122118 | 425. 909 | 8232942. 953 |
| M379T463   | 379. 1406779 | 463. 271 | 1560776. 972 |
| M379T440   | 379. 1480616 | 440. 459 | 12241160. 89 |
| M379T369   | 379. 1620731 | 369. 321 | 7147926. 72  |
| M379T412   | 379. 1596877 | 411. 838 | 4973348. 184 |
| M379T402   | 379. 1596673 | 401. 963 | 9020879. 094 |
| M379T171   | 379. 1695236 | 170. 665 | 1308230. 145 |
| M379T395   | 379. 1792531 | 395. 264 | 14922109. 91 |
| M379T531   | 379. 1798935 | 531. 127 | 2771664. 587 |
| M379T96    | 379. 1786876 | 95. 7572 | 31761540. 78 |
| M379T104   | 379. 1784757 | 104. 493 | 57827373. 87 |
| M379T524_1 | 379. 1804054 | 523. 735 | 1375013. 24  |
| M379T379   | 379. 1840288 | 379. 194 | 9994763. 133 |
| M379T351   | 379. 2087215 | 351. 348 | 7562270. 765 |
| M379T816   | 379. 206551  | 815. 517 | 7817239. 236 |
| M379T339   | 379. 2050359 | 339. 085 | 8737270. 355 |
| M379T524_2 | 379. 2124261 | 523. 735 | 7817335. 549 |
| M379T724   | 379. 2645175 | 723. 682 | 2126952. 5   |
| M379T631   | 379. 2987424 | 630. 507 | 673361. 8717 |
| M379T426_2 | 379. 2981113 | 425. 909 | 5520168. 368 |
| M380T371_1 | 379. 5622508 | 370. 777 | 4948354. 688 |
| M380T425   | 379. 6888274 | 424. 572 | 1710981. 172 |
| M380T482   | 379. 8813223 | 482. 436 | 5059753. 849 |
| M380T371_2 | 379. 8902695 | 370. 777 | 3053126. 383 |
| M380T122   | 379. 9642341 | 122. 007 | 2080824. 937 |
| M380T741   | 380. 0240636 | 741. 302 | 7479700. 832 |
| M380T426   | 380. 1103267 | 425. 909 | 1110537. 439 |
| M380T392   | 380. 1210115 | 391. 678 | 4898845. 628 |
| M380T381   | 380. 1205621 | 380. 63  | 4461738. 673 |
| M380T494   | 380. 1199412 | 494. 289 | 2210659. 798 |
| M380T393   | 380. 1329689 | 392. 715 | 117132316. 9 |
| M380T372   | 380. 1328507 | 372. 152 | 25118454. 67 |
| M380T351   | 380. 1329207 | 351. 348 | 22186085. 18 |
| M380T386   | 380. 1329883 | 386. 352 | 73303824. 9  |
| M380T328   | 380. 1328256 | 328. 106 | 16075105. 67 |
| M380T419   | 380. 1328595 | 418. 97  | 41333939. 56 |
| M380T339   | 380. 1331294 | 339. 085 | 10930823. 94 |
| M380T777   | 380. 1434189 | 777. 245 | 2759325. 061 |
| M380T409   | 380. 1547    | 409. 271 | 8014846. 177 |
| M380T446   | 380. 152088  | 445. 984 | 4043317. 363 |
| M380T92    | 380. 1540179 | 91. 7174 | 29951489     |
| M380T104_1 | 380. 1541866 | 104. 493 | 29796693. 4  |
| M380T390   | 380. 1555158 | 390. 432 | 7508939. 027 |
| M380T143   | 380. 1559208 | 142. 85  | 9305354. 294 |
| M380T463   | 380. 1813096 | 463. 271 | 4490271. 41  |
| M380T104_2 | 380. 1788946 | 104. 493 | 5952456. 688 |
| M380T401   | 380. 1926684 | 400. 59  | 3698951. 641 |
| M380T106   | 380. 190512  | 105. 503 | 57556865. 62 |
| M380T491   | 380. 1996718 | 491. 373 | 4944601. 413 |

|            |              |          |              |
|------------|--------------|----------|--------------|
| M380T341   | 380. 1932797 | 340. 548 | 2211738. 867 |
| M380T513   | 380. 2155618 | 513. 285 | 4389208. 68  |
| M380T418   | 380. 2199748 | 417. 676 | 2007825. 999 |
| M380T610   | 380. 2372347 | 609. 592 | 50735723. 73 |
| M380T433   | 380. 240196  | 433. 111 | 9844201. 133 |
| M380T804   | 380. 2571864 | 804. 327 | 20561078. 93 |
| M380T528   | 380. 2631525 | 528. 185 | 616138. 4648 |
| M381T494   | 380. 6220655 | 494. 289 | 1154839. 38  |
| M381T101   | 381. 0747712 | 101. 161 | 127606818. 4 |
| M381T651   | 381. 074749  | 650. 898 | 20809524. 72 |
| M381T93    | 381. 0747947 | 92. 7272 | 156923983    |
| M381T622   | 381. 1149006 | 621. 708 | 12343121. 81 |
| M381T574   | 381. 1144908 | 574. 363 | 6712366. 972 |
| M381T474   | 381. 1144662 | 473. 597 | 5572371. 282 |
| M381T598   | 381. 1148184 | 598. 125 | 24307466. 54 |
| M381T591   | 381. 1150878 | 590. 607 | 12255718. 69 |
| M381T423   | 381. 1143908 | 423. 199 | 3569806. 348 |
| M381T608   | 381. 1148445 | 608. 261 | 52457195. 24 |
| M381T509   | 381. 1170787 | 508. 883 | 16933390. 02 |
| M381T328   | 381. 1273842 | 328. 106 | 5377930. 221 |
| M381T392   | 381. 1368447 | 391. 678 | 21234570. 31 |
| M381T385_1 | 381. 1368121 | 385. 081 | 13993595. 89 |
| M381T401   | 381. 1490465 | 400. 59  | 5270574. 377 |
| M381T104_1 | 381. 1487776 | 104. 493 | 12914391. 79 |
| M381T148   | 381. 148792  | 148. 117 | 4867777. 849 |
| M381T829   | 381. 16488   | 828. 73  | 2539159. 07  |
| M381T318   | 381. 1630799 | 318. 497 | 19451972. 61 |
| M381T416   | 381. 1736315 | 416. 239 | 4444249. 039 |
| M381T436   | 381. 1735369 | 436. 069 | 3023296. 701 |
| M381T385_2 | 381. 1708968 | 385. 081 | 6208722. 427 |
| M381T594   | 381. 1779005 | 593. 62  | 5453062. 298 |
| M381T331   | 381. 1771113 | 330. 809 | 3326137. 042 |
| M381T358   | 381. 1769152 | 357. 958 | 7760249. 559 |
| M381T406   | 381. 1768667 | 406. 289 | 6069392. 322 |
| M381T287   | 381. 1868901 | 287. 148 | 4327668. 086 |
| M381T263   | 381. 1842735 | 262. 529 | 3170926. 123 |
| M381T497   | 381. 1876715 | 497. 214 | 61477832. 19 |
| M381T390   | 381. 1838637 | 390. 432 | 41030909. 15 |
| M381T280   | 381. 184246  | 280. 345 | 3415345. 103 |
| M381T172   | 381. 1842418 | 171. 935 | 15115854. 66 |
| M381T295   | 381. 1859319 | 295. 356 | 2355432. 593 |
| M381T104_2 | 381. 1929758 | 104. 493 | 6024866. 442 |
| M381T694   | 381. 2301152 | 693. 81  | 2861495. 584 |
| M381T610   | 381. 2424084 | 609. 592 | 12173851. 66 |
| M381T803   | 381. 2582777 | 802. 88  | 5043057. 256 |
| M381T534   | 381. 3129907 | 533. 958 | 3692170. 522 |
| M382T670   | 381. 6910423 | 670. 166 | 22877437. 11 |
| M382T101   | 382. 0804557 | 101. 161 | 18372973. 18 |
| M382T93    | 382. 0804571 | 92. 7272 | 19999380. 34 |
| M382T381   | 382. 1125387 | 380. 63  | 8915400. 303 |
| M382T94    | 382. 1068905 | 93. 7378 | 3292208. 223 |
| M382T402   | 382. 1097834 | 401. 963 | 4603510. 636 |
| M382T598   | 382. 119165  | 598. 125 | 4698160. 831 |
| M382T371   | 382. 112823  | 370. 777 | 9943391. 26  |

|          |              |          |              |
|----------|--------------|----------|--------------|
| M382T608 | 382. 1191288 | 608. 261 | 8110581. 338 |
| M382T158 | 382. 1318383 | 157. 773 | 6194905. 458 |
| M382T389 | 382. 1459045 | 389. 035 | 10735688. 44 |
| M382T335 | 382. 1468665 | 334. 966 | 21594871. 83 |
| M382T418 | 382. 1468584 | 417. 676 | 21503737. 15 |
| M382T396 | 382. 1494125 | 396. 415 | 5318125. 859 |
| M382T502 | 382. 1458951 | 501. 549 | 25531405. 41 |
| M382T324 | 382. 1459166 | 323. 984 | 9120178. 292 |
| M382T309 | 382. 1623461 | 308. 967 | 30876990. 44 |
| M382T351 | 382. 1600341 | 351. 348 | 14420188. 7  |
| M382T375 | 382. 1599855 | 375. 021 | 37523221. 61 |
| M382T399 | 382. 1600453 | 399. 046 | 7869858. 452 |
| M382T359 | 382. 1620282 | 359. 32  | 16869722. 1  |
| M382T386 | 382. 1600376 | 386. 352 | 8518101. 06  |
| M382T95  | 382. 1689038 | 94. 7467 | 25037337. 07 |
| M382T104 | 382. 1689418 | 104. 493 | 31759792. 61 |
| M382T669 | 382. 1881706 | 668. 867 | 8800697. 271 |
| M382T427 | 382. 2053183 | 427. 362 | 2077532. 246 |
| M382T816 | 382. 2680939 | 815. 517 | 6357910. 435 |
| M382T800 | 382. 326631  | 800. 484 | 2052617. 579 |
| M383T415 | 382. 7167761 | 414. 82  | 2233901. 692 |
| M383T75  | 382. 9292286 | 74. 9588 | 15949095. 1  |
| M383T321 | 383. 0258581 | 321. 198 | 6320854. 398 |
| M383T94  | 383. 0756914 | 93. 7378 | 8930739. 729 |
| M383T712 | 383. 1415962 | 711. 984 | 10753840. 02 |
| M383T316 | 383. 1458944 | 315. 701 | 5852539. 085 |
| M383T334 | 383. 1531686 | 333. 715 | 5277256. 265 |
| M383T502 | 383. 1503964 | 501. 549 | 4649988. 594 |
| M383T374 | 383. 1634369 | 373. 532 | 5012020. 784 |
| M383T416 | 383. 1786936 | 416. 239 | 4896381. 557 |
| M383T451 | 383. 1912452 | 450. 503 | 2707052. 1   |
| M383T385 | 383. 1895681 | 385. 081 | 9854545. 326 |
| M383T324 | 383. 192147  | 323. 984 | 26429155. 84 |
| M383T653 | 383. 2373598 | 653. 147 | 19416290. 08 |
| M383T422 | 383. 2466418 | 421. 784 | 1284972. 772 |
| M383T533 | 383. 2929799 | 532. 526 | 6714579. 568 |
| M383T562 | 383. 3282095 | 561. 955 | 61122250. 94 |
| M384T754 | 384. 0486562 | 753. 987 | 7854543. 692 |
| M384T286 | 384. 1116317 | 285. 9   | 5822846. 704 |
| M384T188 | 384. 1105942 | 188. 126 | 3445360. 125 |
| M384T355 | 384. 1179104 | 355. 41  | 30296589. 97 |
| M384T365 | 384. 1178449 | 365. 061 | 3501138. 025 |
| M384T472 | 384. 1451843 | 472. 132 | 5751674. 448 |
| M384T293 | 384. 1481621 | 292. 623 | 3685458. 032 |
| M384T100 | 384. 1467825 | 100. 146 | 53017636. 49 |
| M384T418 | 384. 1536919 | 417. 676 | 2611012. 89  |
| M384T314 | 384. 1649362 | 314. 259 | 6060504. 518 |
| M384T552 | 384. 1633001 | 552. 452 | 1458100. 407 |
| M384T301 | 384. 1649793 | 300. 782 | 5215156. 475 |
| M384T357 | 384. 1729906 | 356. 74  | 5645987. 057 |
| M384T339 | 384. 1784434 | 339. 085 | 4989317. 911 |
| M384T223 | 384. 1876457 | 223. 474 | 6269949. 787 |
| M384T535 | 384. 1927204 | 535. 329 | 2389289. 016 |
| M384T653 | 384. 235548  | 653. 147 | 12334645. 53 |



|            |              |          |              |
|------------|--------------|----------|--------------|
| M385T390_1 | 384. 8721909 | 390. 432 | 8982600. 056 |
| M385T336   | 385. 0422692 | 336. 344 | 1634725. 888 |
| M385T164   | 385. 0583917 | 163. 846 | 2179465. 69  |
| M385T566   | 385. 0906493 | 565. 79  | 1778559. 686 |
| M385T355   | 385. 119645  | 355. 41  | 5036230. 115 |
| M385T325   | 385. 1327788 | 325. 35  | 4011954. 973 |
| M385T316   | 385. 1327183 | 315. 701 | 2045911. 598 |
| M385T106   | 385. 142672  | 105. 503 | 20342306. 45 |
| M385T94    | 385. 141851  | 93. 7378 | 17613347. 08 |
| M385T293   | 385. 1444378 | 292. 623 | 7614420. 856 |
| M385T455   | 385. 1449299 | 454. 739 | 4816092. 029 |
| M385T706   | 385. 1640163 | 706. 229 | 12503487. 62 |
| M385T799   | 385. 1621017 | 799. 089 | 8969488. 147 |
| M385T237   | 385. 1578269 | 237. 171 | 3928161. 976 |
| M385T776   | 385. 1622876 | 776. 194 | 9365540. 958 |
| M385T309   | 385. 1711182 | 308. 967 | 14651400. 91 |
| M385T202   | 385. 17026   | 202. 149 | 4594257. 163 |
| M385T244   | 385. 1695428 | 244. 085 | 4965414. 162 |
| M385T335   | 385. 171254  | 334. 966 | 8208373. 644 |
| M385T260   | 385. 1694212 | 259. 74  | 5352377. 891 |
| M385T317   | 385. 1711927 | 317. 199 | 12262444. 63 |
| M385T212   | 385. 1679744 | 212. 448 | 3301052. 524 |
| M385T522   | 385. 1796137 | 522. 177 | 1465157. 161 |
| M385T367   | 385. 1924934 | 366. 514 | 3680974. 138 |
| M385T245   | 385. 1938864 | 245. 199 | 5606702. 32  |
| M385T436   | 385. 1955512 | 436. 069 | 2647290. 514 |
| M385T390_2 | 385. 2054732 | 390. 432 | 6017981. 155 |
| M385T369   | 385. 2303897 | 369. 321 | 1279344. 125 |
| M385T430   | 385. 2429242 | 430. 131 | 4541532. 976 |
| M385T371   | 385. 2541704 | 370. 777 | 667918. 9393 |
| M385T429   | 385. 2566825 | 428. 735 | 1151352. 694 |
| M385T563   | 385. 310105  | 563. 297 | 13487382. 32 |
| M386T760   | 386. 1284824 | 759. 605 | 1296804. 43  |
| M386T320   | 386. 1373471 | 319. 758 | 9501906. 957 |
| M386T298   | 386. 1369175 | 298. 135 | 5252523. 895 |
| M386T161   | 386. 142327  | 161. 494 | 4615493. 21  |
| M386T106   | 386. 1427156 | 105. 503 | 5183536. 502 |
| M386T317   | 386. 1508189 | 317. 199 | 15831189. 62 |
| M386T101   | 386. 1607174 | 101. 161 | 51963436. 96 |
| M386T95    | 386. 1616627 | 94. 7467 | 36968961. 24 |
| M386T119   | 386. 1602184 | 119. 433 | 11232160. 26 |
| M386T163   | 386. 1550514 | 162. 728 | 2970765. 347 |
| M386T144   | 386. 1616541 | 143. 959 | 3767883. 872 |
| M386T293   | 386. 162621  | 292. 623 | 3486103. 469 |
| M386T87    | 386. 1623917 | 86. 6643 | 40232055. 71 |
| M386T158   | 386. 1668527 | 157. 773 | 2681682. 496 |
| M386T188   | 386. 1643019 | 188. 126 | 6238865. 666 |
| M386T371   | 386. 2019683 | 370. 777 | 3217210. 676 |
| M386T335   | 386. 2365133 | 334. 966 | 1965947. 176 |
| M386T603   | 386. 2507181 | 602. 513 | 1689465. 805 |
| M387T252   | 386. 9844285 | 251. 555 | 1871930. 488 |
| M387T84    | 387. 0023191 | 83. 5661 | 14093494. 52 |
| M387T325   | 387. 0295518 | 325. 35  | 1684376. 567 |
| M387T158   | 387. 0359924 | 157. 773 | 9849198. 376 |

|            |              |          |              |
|------------|--------------|----------|--------------|
| M387T143   | 387. 0360851 | 142. 85  | 15448657. 1  |
| M387T666   | 387. 1412741 | 666. 137 | 5109513. 752 |
| M387T591   | 387. 1422747 | 590. 607 | 3457053. 45  |
| M387T418   | 387. 1598556 | 417. 676 | 2012839. 619 |
| M387T456   | 387. 1676826 | 456. 126 | 2985508. 519 |
| M387T427   | 387. 1602772 | 427. 362 | 2479254. 654 |
| M387T445   | 387. 1610731 | 444. 725 | 3112897. 828 |
| M387T503   | 387. 1737618 | 503. 046 | 1801735. 244 |
| M387T362   | 387. 1737402 | 362. 146 | 3363050. 408 |
| M387T406   | 387. 1739513 | 406. 289 | 4947997. 647 |
| M387T662   | 387. 1774434 | 661. 979 | 36052676. 82 |
| M387T788   | 387. 1818848 | 787. 856 | 51091596. 98 |
| M387T422   | 387. 1754302 | 421. 784 | 8100883. 147 |
| M387T747   | 387. 1776039 | 746. 977 | 28719345. 54 |
| M387T779   | 387. 1758339 | 778. 543 | 14969312. 92 |
| M387T757   | 387. 1774966 | 757. 001 | 9161225. 937 |
| M387T335   | 387. 1856179 | 334. 966 | 3062323. 835 |
| M387T461   | 387. 2010992 | 460. 537 | 4930563. 84  |
| M388T314   | 387. 7236791 | 314. 259 | 3257217. 098 |
| M388T253   | 388. 1096203 | 253. 024 | 2272017. 837 |
| M388T409   | 388. 136723  | 409. 271 | 3916584. 089 |
| M388T418   | 388. 1366917 | 417. 676 | 8129805. 698 |
| M388T150   | 388. 1421589 | 149. 65  | 5720667. 935 |
| M388T131   | 388. 1420315 | 130. 668 | 2431551. 514 |
| M388T309   | 388. 1592963 | 308. 967 | 6999699. 734 |
| M388T294_1 | 388. 1601919 | 293. 896 | 3880780. 439 |
| M388T106   | 388. 1584562 | 105. 503 | 11468942. 08 |
| M388T123   | 388. 1726809 | 123. 262 | 35861083. 26 |
| M388T361   | 388. 1665458 | 360. 794 | 2568546. 911 |
| M388T324   | 388. 1656483 | 323. 984 | 2942047. 283 |
| M388T101   | 388. 179201  | 101. 161 | 1022907192   |
| M388T95    | 388. 1792204 | 94. 7467 | 946113919. 6 |
| M388T290   | 388. 171249  | 289. 912 | 7999968. 136 |
| M388T649   | 388. 1800613 | 649. 338 | 33441080. 46 |
| M388T143   | 388. 1752813 | 142. 85  | 19643512. 58 |
| M388T787   | 388. 1792123 | 786. 569 | 14656250. 43 |
| M388T662   | 388. 1837646 | 661. 979 | 8944978. 372 |
| M388T294_2 | 388. 2072324 | 293. 896 | 2545458. 132 |
| M388T304   | 388. 2072973 | 303. 513 | 18578748. 82 |
| M388T636   | 388. 2198361 | 636. 473 | 2554348. 296 |
| M388T423   | 388. 2181175 | 423. 199 | 3210444. 185 |
| M388T448   | 388. 2508895 | 447. 531 | 7108090. 997 |
| M388T799   | 388. 3033252 | 799. 089 | 8285673. 027 |
| M389T163   | 389. 0436915 | 162. 728 | 14811155. 48 |
| M389T388   | 389. 1310038 | 387. 763 | 1393980. 52  |
| M389T418   | 389. 1520533 | 417. 676 | 1002161. 666 |
| M389T810   | 389. 1575252 | 810. 052 | 6252830. 515 |
| M389T554   | 389. 1556188 | 553. 936 | 6932391. 993 |
| M389T614   | 389. 1575093 | 614. 215 | 14156055. 02 |
| M389T101   | 389. 1811968 | 101. 161 | 140333208. 4 |
| M389T95    | 389. 1811966 | 94. 7467 | 131075871. 2 |
| M389T406   | 389. 1784072 | 406. 289 | 2261892. 78  |
| M389T626   | 389. 1939775 | 626. 042 | 18738043. 23 |
| M389T804   | 389. 1967208 | 804. 327 | 52951547. 32 |

|           |              |          |              |
|-----------|--------------|----------|--------------|
| M389T824  | 389. 1966847 | 824. 311 | 37513828. 47 |
| M389T433  | 389. 2139674 | 433. 111 | 4566694. 39  |
| M389T519  | 389. 2176073 | 519. 257 | 5497854. 383 |
| M389T666  | 389. 2484801 | 666. 137 | 6166296. 795 |
| M389T448  | 389. 2539985 | 447. 531 | 1599833. 921 |
| M389T711  | 389. 2867332 | 710. 534 | 8468640. 32  |
| M390T163  | 389. 5473689 | 162. 728 | 1859695. 033 |
| M390T295  | 390. 0997117 | 295. 356 | 10098711. 07 |
| M390T168  | 390. 1368954 | 167. 804 | 5457026. 488 |
| M390T107  | 390. 1384249 | 106. 513 | 3729134. 57  |
| M390T190  | 390. 1495812 | 189. 571 | 2593325. 468 |
| M390T210  | 390. 1496401 | 210. 186 | 3312919. 408 |
| M390T198  | 390. 1495863 | 198. 072 | 3642055. 489 |
| M390T430  | 390. 1751512 | 430. 131 | 6755753. 049 |
| M390T418  | 390. 175133  | 417. 676 | 25562211. 11 |
| M390T669  | 390. 1771017 | 668. 867 | 1663962. 422 |
| M390T101  | 390. 1869224 | 101. 161 | 25256801. 31 |
| M390T95   | 390. 1870449 | 94. 7467 | 27965603. 67 |
| M390T708  | 390. 1896935 | 707. 557 | 16188061. 52 |
| M390T339  | 390. 1863411 | 339. 085 | 3826483. 098 |
| M390T402  | 390. 1856114 | 401. 963 | 1819533. 767 |
| M390T626  | 390. 1955996 | 626. 042 | 3857914. 635 |
| M390T475  | 390. 2131241 | 475. 007 | 653706. 4435 |
| M390T519  | 390. 220879  | 519. 257 | 800029. 7058 |
| M390T345  | 390. 2265616 | 344. 555 | 48651998. 7  |
| M390T783  | 390. 2263777 | 782. 558 | 715370. 2432 |
| M390T718  | 390. 2607843 | 717. 959 | 2554706. 595 |
| M390T620  | 390. 2813711 | 620. 172 | 10946502. 4  |
| M390T583  | 390. 2828487 | 583. 068 | 6641964. 286 |
| M390T817  | 390. 3196312 | 816. 953 | 1771296. 649 |
| M390T785  | 390. 3543445 | 785. 136 | 1739350. 781 |
| M391T409  | 391. 1600698 | 409. 271 | 4807610. 224 |
| M391T390  | 391. 1585168 | 390. 432 | 5458787. 183 |
| M391T382  | 391. 1584505 | 382. 125 | 9801423. 141 |
| M391T92_1 | 391. 1691199 | 91. 7174 | 73357741. 01 |
| M391T321  | 391. 1709184 | 321. 198 | 4450249. 187 |
| M391T102  | 391. 1801775 | 102. 247 | 107172317. 4 |
| M391T594  | 391. 1747419 | 593. 62  | 36431046. 32 |
| M391T613  | 391. 1774754 | 612. 699 | 28369351. 02 |
| M391T248  | 391. 1804274 | 247. 692 | 4239792. 292 |
| M391T92_2 | 391. 1803675 | 91. 7174 | 20054400. 03 |
| M391T427  | 391. 1951077 | 427. 362 | 760900. 0761 |
| M391T392  | 391. 2059926 | 391. 678 | 54347207. 51 |
| M391T796  | 391. 2098429 | 796. 474 | 12591953. 43 |
| M391T830  | 391. 2787739 | 830. 193 | 17035579. 93 |
| M391T811  | 391. 2789625 | 811. 413 | 19301047. 48 |
| M391T820  | 391. 2791794 | 819. 78  | 20470958. 81 |
| M391T705  | 391. 2894161 | 704. 715 | 13688568. 81 |
| M391T785  | 391. 2894953 | 785. 136 | 13978423. 22 |
| M391T680  | 391. 2893259 | 680. 402 | 28472462. 45 |
| M391T724  | 391. 2895798 | 723. 682 | 13261302. 84 |
| M391T731  | 391. 2891967 | 731. 347 | 14798739. 48 |
| M391T31   | 391. 2863311 | 31. 142  | 9000630. 393 |
| M391T771  | 391. 2893716 | 771. 042 | 19945058. 62 |

|          |              |          |              |
|----------|--------------|----------|--------------|
| M391T747 | 391. 2895217 | 746. 977 | 14766649. 54 |
| M391T695 | 391. 2891955 | 695. 155 | 17276929. 32 |
| M391T799 | 391. 2893198 | 799. 089 | 25992720. 22 |
| M391T713 | 391. 2895155 | 713. 464 | 12775081. 19 |
| M392T524 | 391. 711065  | 523. 735 | 2258659. 667 |
| M392T572 | 391. 7237391 | 571. 523 | 1867205. 368 |
| M392T443 | 392. 0226705 | 443. 256 | 1728795. 24  |
| M392T411 | 392. 1434728 | 410. 542 | 858465. 7993 |
| M392T282 | 392. 1528536 | 281. 666 | 8970242. 776 |
| M392T297 | 392. 1515057 | 296. 739 | 17892568. 72 |
| M392T320 | 392. 1528044 | 319. 758 | 8500704. 043 |
| M392T195 | 392. 1626637 | 195. 23  | 31458153. 42 |
| M392T384 | 392. 1619984 | 383. 536 | 1237086. 553 |
| M392T104 | 392. 1572779 | 104. 493 | 19692844. 73 |
| M392T212 | 392. 1626582 | 212. 448 | 86896445. 7  |
| M392T92  | 392. 1709625 | 91. 7174 | 11344418. 73 |
| M392T102 | 392. 1837528 | 102. 247 | 17097305. 65 |
| M392T418 | 392. 1824856 | 417. 676 | 2099686. 018 |
| M392T294 | 392. 1893933 | 293. 896 | 1335036. 845 |
| M392T673 | 392. 2093878 | 672. 956 | 15704694. 96 |
| M392T503 | 392. 2263561 | 503. 046 | 2921911. 262 |
| M392T690 | 392. 2239817 | 689. 5   | 1335519. 455 |
| M392T623 | 392. 2427541 | 623. 11  | 6205314. 923 |
| M392T737 | 392. 2756458 | 737. 198 | 24295194. 19 |
| M392T56  | 392. 2834206 | 56. 1096 | 18179308. 47 |
| M393T211 | 393. 0306043 | 211. 288 | 3005921. 675 |
| M393T161 | 393. 0415484 | 161. 494 | 9182540. 223 |
| M393T147 | 393. 0416032 | 146. 742 | 6747221. 342 |
| M393T706 | 393. 0988084 | 706. 229 | 17939282. 49 |
| M393T715 | 393. 098789  | 715. 011 | 10316428. 93 |
| M393T659 | 393. 0987328 | 658. 953 | 100740259. 4 |
| M393T144 | 393. 1484757 | 143. 959 | 27619491. 37 |
| M393T108 | 393. 1467896 | 107. 537 | 17364607. 18 |
| M393T507 | 393. 152464  | 507. 343 | 6414347. 609 |
| M393T365 | 393. 1635419 | 365. 061 | 2200452. 213 |
| M393T375 | 393. 174609  | 375. 021 | 7850654. 345 |
| M393T388 | 393. 1745639 | 387. 763 | 1771318. 646 |
| M393T212 | 393. 1688656 | 212. 448 | 11424987. 38 |
| M393T582 | 393. 1893032 | 581. 625 | 45198646. 77 |
| M393T362 | 393. 185697  | 362. 146 | 2263101. 251 |
| M393T403 | 393. 1875024 | 403. 447 | 4903994. 79  |
| M393T620 | 393. 1990902 | 620. 172 | 1954387. 777 |
| M393T504 | 393. 2101816 | 504. 466 | 2320482. 715 |
| M393T448 | 393. 2066945 | 447. 531 | 5665599. 842 |
| M393T389 | 393. 2216949 | 389. 035 | 9609339. 721 |
| M393T405 | 393. 2215738 | 404. 872 | 11900498. 05 |
| M393T374 | 393. 221824  | 373. 532 | 8670632. 408 |
| M393T838 | 393. 259738  | 837. 524 | 15761817. 38 |
| M393T737 | 393. 2835068 | 737. 198 | 6092597. 816 |
| M393T537 | 393. 2979    | 536. 761 | 650482. 58   |
| M394T164 | 393. 9797479 | 163. 846 | 13193400. 18 |
| M394T660 | 394. 104211  | 660. 455 | 18018988. 29 |
| M394T653 | 394. 1041962 | 653. 147 | 12815604. 91 |
| M394T347 | 394. 1231167 | 347. 175 | 12215572. 81 |

|            |              |          |              |
|------------|--------------|----------|--------------|
| M394T308   | 394. 1340514 | 307. 735 | 5897830. 99  |
| M394T163   | 394. 1316842 | 162. 728 | 7778856. 167 |
| M394T325   | 394. 1315695 | 325. 35  | 7618703. 076 |
| M394T143   | 394. 1321817 | 142. 85  | 5376935. 195 |
| M394T430   | 394. 148085  | 430. 131 | 3302012. 304 |
| M394T145   | 394. 1534733 | 145. 382 | 2592104. 141 |
| M394T389_1 | 394. 161373  | 389. 035 | 8179564. 548 |
| M394T381   | 394. 1622646 | 380. 63  | 13906152. 15 |
| M394T96    | 394. 171127  | 95. 7572 | 8785267. 992 |
| M394T201   | 394. 1692092 | 200. 766 | 5324861. 874 |
| M394T188   | 394. 1690672 | 188. 126 | 7224065. 707 |
| M394T304   | 394. 1692815 | 303. 513 | 3645088. 067 |
| M394T104   | 394. 1675023 | 104. 493 | 19935128. 64 |
| M394T354   | 394. 1693956 | 353. 978 | 50002356. 35 |
| M394T389_2 | 394. 1731704 | 389. 035 | 34122476. 52 |
| M394T364   | 394. 1832063 | 363. 58  | 6145748. 164 |
| M394T518   | 394. 1950277 | 517. 762 | 9018545. 778 |
| M394T582   | 394. 1933449 | 581. 625 | 9895627. 977 |
| M394T528   | 394. 1881208 | 528. 185 | 1862244. 885 |
| M394T438   | 394. 1942628 | 437. 571 | 2236784. 3   |
| M394T429   | 394. 1937736 | 428. 735 | 1265089. 635 |
| M394T688   | 394. 2008037 | 687. 95  | 4932651. 99  |
| M394T412   | 394. 2094961 | 411. 838 | 3887760. 764 |
| M394T426   | 394. 2053558 | 425. 909 | 2401146. 763 |
| M394T677   | 394. 2229225 | 677. 376 | 5228498. 323 |
| M394T443   | 394. 2350891 | 443. 256 | 9936220. 376 |
| M394T456   | 394. 2433324 | 456. 126 | 6257376. 447 |
| M394T638   | 394. 2565162 | 637. 996 | 20887032. 9  |
| M394T838   | 394. 2660835 | 837. 524 | 1842007. 064 |
| M395T741   | 394. 7229299 | 741. 302 | 4367208. 297 |
| M395T690   | 395. 1212327 | 689. 5   | 2274636. 984 |
| M395T418   | 395. 1265321 | 417. 676 | 26861374     |
| M395T419_1 | 395. 1397159 | 418. 97  | 2969578. 589 |
| M395T351   | 395. 1526139 | 351. 348 | 2127491. 388 |
| M395T395   | 395. 1544982 | 395. 264 | 1381473. 505 |
| M395T161   | 395. 1630938 | 161. 494 | 20515701. 32 |
| M395T381   | 395. 1628465 | 380. 63  | 1819010. 118 |
| M395T94    | 395. 1637824 | 93. 7378 | 9168721. 629 |
| M395T353   | 395. 1769014 | 352. 65  | 9743531. 973 |
| M395T388   | 395. 1768097 | 387. 763 | 5001916. 569 |
| M395T449   | 395. 1917711 | 448. 978 | 2218766. 067 |
| M395T580   | 395. 1936084 | 580. 22  | 699603. 8206 |
| M395T369   | 395. 2010382 | 369. 321 | 2276854. 544 |
| M395T552   | 395. 2066179 | 552. 452 | 1495495. 507 |
| M395T316   | 395. 2009009 | 315. 701 | 4969257. 968 |
| M395T304   | 395. 2009151 | 303. 513 | 6405334. 121 |
| M395T420   | 395. 2092368 | 420. 274 | 7143471. 531 |
| M395T412   | 395. 2150785 | 411. 838 | 101663483. 8 |
| M395T764   | 395. 2896312 | 763. 856 | 57183662. 33 |
| M395T474   | 395. 2922955 | 473. 597 | 2090796. 935 |
| M395T419_2 | 395. 2961393 | 418. 97  | 5939522. 281 |
| M395T814   | 395. 2951263 | 814. 095 | 55224201. 96 |
| M395T798   | 395. 29552   | 797. 773 | 20051410. 94 |
| M395T573   | 395. 2922238 | 573. 072 | 5364146. 278 |

|            |             |         |             |
|------------|-------------|---------|-------------|
| M395T776   | 395.2904771 | 776.194 | 60555965.92 |
| M395T826   | 395.291794  | 825.74  | 20939861.8  |
| M395T562   | 395.365261  | 561.955 | 6077208.628 |
| M396T346   | 395.7232608 | 345.848 | 9167978.141 |
| M396T75    | 395.9567112 | 74.9588 | 15668757.05 |
| M396T118   | 396.0313549 | 118.116 | 12944156.73 |
| M396T826_1 | 396.0499851 | 825.74  | 6502108.405 |
| M396T311   | 396.1260274 | 311.445 | 4761322.604 |
| M396T332   | 396.1261349 | 332.2   | 12141218.64 |
| M396T636   | 396.1229613 | 636.473 | 1963619.51  |
| M396T402   | 396.1259483 | 401.963 | 5537834.899 |
| M396T472   | 396.1306169 | 472.132 | 3020053.793 |
| M396T418_1 | 396.1331341 | 417.676 | 8512140.947 |
| M396T777   | 396.1338408 | 777.245 | 2336484.478 |
| M396T382   | 396.1331306 | 382.125 | 4346989.046 |
| M396T143_1 | 396.1493914 | 142.85  | 14475049.44 |
| M396T123_1 | 396.1471353 | 123.262 | 11860845.97 |
| M396T94    | 396.1472668 | 93.7378 | 35837226.57 |
| M396T104_1 | 396.1472895 | 104.493 | 41436441.59 |
| M396T97    | 396.1811785 | 96.7698 | 127413134.4 |
| M396T381_1 | 396.1789496 | 380.63  | 21735394.49 |
| M396T123_2 | 396.1825951 | 123.262 | 18052107.39 |
| M396T104_2 | 396.1809831 | 104.493 | 114307946.6 |
| M396T143_2 | 396.1874353 | 142.85  | 10582301.07 |
| M396T371   | 396.1847679 | 370.777 | 15148208.99 |
| M396T381_2 | 396.1901571 | 380.63  | 29373188.21 |
| M396T413   | 396.2203097 | 413.295 | 28018794.16 |
| M396T419   | 396.2573637 | 418.97  | 9041041.679 |
| M396T418_2 | 396.2945063 | 417.676 | 1639103.521 |
| M396T816   | 396.293932  | 815.517 | 7438287.052 |
| M396T776   | 396.2949988 | 776.194 | 34139231.02 |
| M396T826_2 | 396.2939855 | 825.74  | 4574200.856 |
| M397T351   | 397.1229353 | 351.348 | 679211.3877 |
| M397T317   | 397.1633142 | 317.199 | 6113699.525 |
| M397T343   | 397.1717284 | 343.226 | 13498612.31 |
| M397T358   | 397.1726059 | 357.958 | 13470269.92 |
| M397T402   | 397.170189  | 401.963 | 8986525.708 |
| M397T332   | 397.1728022 | 332.2   | 8002313.821 |
| M397T566   | 397.1849059 | 565.79  | 2489910.491 |
| M397T381   | 397.1874635 | 380.63  | 7594179.48  |
| M397T779   | 397.1816697 | 778.543 | 3217671.044 |
| M397T98    | 397.1888445 | 97.7824 | 22804373.17 |
| M397T104   | 397.1887028 | 104.493 | 20493682.22 |
| M397T412   | 397.2203863 | 411.838 | 2808498.53  |
| M397T525   | 397.2205551 | 525.132 | 1167089.862 |
| M397T772   | 397.2462843 | 772.206 | 3797400.584 |
| M397T582   | 397.3068318 | 581.625 | 4300495.15  |
| M397T622   | 397.3087797 | 621.708 | 5008928.882 |
| M397T430   | 397.3087017 | 430.131 | 11913139.11 |
| M397T830   | 397.3108867 | 830.193 | 12608175.26 |
| M397T527   | 397.3086521 | 526.676 | 7526937.815 |
| M398T807   | 398.0665265 | 807.232 | 19999917.33 |
| M398T371_1 | 398.1046546 | 370.777 | 1075166.255 |
| M398T324   | 398.1287538 | 323.984 | 7310392.806 |

|            |              |          |              |
|------------|--------------|----------|--------------|
| M398T343   | 398. 1413781 | 343. 226 | 22983577. 43 |
| M398T331   | 398. 1411653 | 330. 809 | 29789697. 42 |
| M398T425   | 398. 1417716 | 424. 572 | 6006193. 271 |
| M398T184   | 398. 1532145 | 183. 886 | 4164310. 826 |
| M398T350   | 398. 1522447 | 349. 911 | 14189289. 11 |
| M398T359   | 398. 1518643 | 359. 32  | 5914283. 388 |
| M398T384   | 398. 1515557 | 383. 536 | 4865461. 709 |
| M398T338   | 398. 1554266 | 337. 767 | 3408085. 41  |
| M398T371_2 | 398. 1553461 | 370. 777 | 2952601. 478 |
| M398T293   | 398. 1629632 | 292. 623 | 1763735. 104 |
| M398T93    | 398. 1643951 | 92. 7272 | 20513924. 32 |
| M398T313   | 398. 1631915 | 312. 85  | 5354715. 096 |
| M398T104_1 | 398. 1647192 | 104. 493 | 35748380. 83 |
| M398T222   | 398. 1669209 | 222. 017 | 5094067. 35  |
| M398T381   | 398. 1885639 | 380. 63  | 1830574. 848 |
| M398T429   | 398. 1935898 | 428. 735 | 3631058. 187 |
| M398T390   | 398. 2015129 | 390. 432 | 6753209. 618 |
| M398T104_2 | 398. 2006672 | 104. 493 | 3648137. 137 |
| M398T426   | 398. 2051548 | 425. 909 | 2711310. 292 |
| M399T75    | 398. 9041094 | 74. 9588 | 5578501. 841 |
| M399T721   | 399. 0419262 | 720. 704 | 1869623. 72  |
| M399T374_1 | 399. 0647709 | 373. 532 | 743556. 0493 |
| M399T286   | 399. 1383988 | 285. 9   | 5555119. 419 |
| M399T343   | 399. 1459102 | 343. 226 | 3585830. 051 |
| M399T481   | 399. 1618443 | 481. 042 | 4252121. 044 |
| M399T488   | 399. 1617691 | 488. 437 | 8768873. 665 |
| M399T422   | 399. 1647566 | 421. 784 | 2758408. 142 |
| M399T389   | 399. 1733644 | 389. 035 | 4798503. 005 |
| M399T187   | 399. 1788646 | 186. 709 | 2319554. 521 |
| M399T791   | 399. 1780393 | 790. 802 | 23015961. 11 |
| M399T833   | 399. 1780509 | 833. 029 | 126857665    |
| M399T814   | 399. 1779908 | 814. 095 | 1059201855   |
| M399T800   | 399. 1780466 | 800. 484 | 14103645. 78 |
| M399T355   | 399. 1856287 | 355. 41  | 5957386. 334 |
| M399T310   | 399. 185473  | 310. 075 | 5950419. 187 |
| M399T336   | 399. 1857718 | 336. 344 | 7577353. 251 |
| M399T374_2 | 399. 1837126 | 373. 532 | 3724291. 544 |
| M399T299   | 399. 1855489 | 299. 493 | 4729767. 308 |
| M399T347   | 399. 1856277 | 347. 175 | 8937940. 346 |
| M399T502   | 399. 1928286 | 501. 549 | 468702. 702  |
| M399T466   | 399. 2575257 | 466. 162 | 2112895. 536 |
| M399T629   | 399. 3170643 | 629. 015 | 986229. 047  |
| M399T555   | 399. 3253633 | 555. 358 | 5485058. 633 |
| M399T829   | 399. 3442392 | 828. 73  | 4019967. 788 |
| M400T353   | 399. 8673132 | 352. 65  | 1923383. 601 |
| M400T158   | 400. 1415402 | 157. 773 | 31432977. 7  |
| M400T145   | 400. 1415706 | 145. 382 | 34354479. 24 |
| M400T311   | 400. 143798  | 311. 445 | 5213317. 896 |
| M400T90    | 400. 1441649 | 89. 6999 | 16250570. 41 |
| M400T293_1 | 400. 1564904 | 292. 623 | 29483582     |
| M400T260   | 400. 157492  | 259. 74  | 4809767. 463 |
| M400T169   | 400. 1555366 | 169. 221 | 10316021. 54 |
| M400T341   | 400. 1575794 | 340. 548 | 18400402. 67 |
| M400T236_1 | 400. 1557084 | 235. 734 | 65765784. 84 |

|            |              |          |              |
|------------|--------------|----------|--------------|
| M400T321   | 400. 156488  | 321. 198 | 17454421. 49 |
| M400T354   | 400. 1564585 | 353. 978 | 15690480. 9  |
| M400T190   | 400. 1668793 | 189. 571 | 11652998. 57 |
| M400T293_2 | 400. 1669391 | 292. 623 | 31692338. 5  |
| M400T236_2 | 400. 1668935 | 235. 734 | 20100716. 57 |
| M400T128   | 400. 1801087 | 127. 944 | 772379. 8822 |
| M400T833   | 400. 1793203 | 833. 029 | 29272498. 02 |
| M400T814   | 400. 1792623 | 814. 095 | 256611451. 8 |
| M400T342   | 400. 1763822 | 341. 802 | 7820574. 958 |
| M400T331   | 400. 1834176 | 330. 809 | 2001229. 793 |
| M400T610   | 400. 213822  | 609. 592 | 2244410. 068 |
| M400T379   | 400. 216273  | 379. 194 | 2974284. 639 |
| M400T84    | 400. 2181987 | 83. 5661 | 4904198. 075 |
| M401T406   | 400. 5391902 | 406. 289 | 3497286. 466 |
| M401T477   | 400. 6990489 | 476. 554 | 2367322. 539 |
| M401T75    | 400. 9367317 | 74. 9588 | 55658834. 82 |
| M401T388   | 401. 1096314 | 387. 763 | 2401709. 846 |
| M401T328   | 401. 1538057 | 328. 106 | 2307388. 926 |
| M401T644   | 401. 153744  | 643. 727 | 10662555. 43 |
| M401T106   | 401. 1537571 | 105. 503 | 6430657. 002 |
| M401T534   | 401. 1587012 | 533. 958 | 6071019. 746 |
| M401T811   | 401. 155718  | 811. 413 | 39117233. 86 |
| M401T802   | 401. 1556342 | 801. 685 | 40688520. 37 |
| M401T234   | 401. 1613253 | 234. 447 | 12173662. 33 |
| M401T826   | 401. 1558059 | 825. 74  | 16119430. 65 |
| M401T294   | 401. 1682264 | 293. 896 | 4482627. 103 |
| M401T323   | 401. 1680913 | 322. 536 | 3574104. 113 |
| M401T341   | 401. 1651943 | 340. 548 | 2980856. 826 |
| M401T354   | 401. 1651943 | 353. 978 | 2445763. 966 |
| M401T469   | 401. 1707576 | 469. 252 | 795958. 126  |
| M401T485   | 401. 1776137 | 485. 471 | 995660. 0572 |
| M401T535   | 401. 1804993 | 535. 329 | 1343796. 773 |
| M401T751   | 401. 190688  | 751. 333 | 26468940. 06 |
| M401T747   | 401. 1919118 | 746. 977 | 36757112. 27 |
| M401T767   | 401. 191895  | 766. 742 | 27281775. 1  |
| M401T412   | 401. 1899545 | 411. 838 | 1751018. 895 |
| M401T814   | 401. 1920198 | 814. 095 | 15101899. 03 |
| M401T730   | 401. 1917853 | 729. 798 | 46092461. 23 |
| M401T783   | 401. 1918913 | 782. 558 | 42403733. 52 |
| M401T836   | 401. 1938662 | 836. 034 | 286501356. 1 |
| M401T824   | 401. 1939    | 824. 311 | 41316294. 42 |
| M401T331   | 401. 1939086 | 330. 809 | 17757124. 93 |
| M401T402   | 401. 2005556 | 401. 963 | 6646366. 75  |
| M401T211   | 401. 2106426 | 211. 288 | 11252444. 24 |
| M401T740   | 401. 230191  | 740. 014 | 1337197. 061 |
| M402T331_1 | 401. 688074  | 330. 809 | 5410204. 019 |
| M402T413   | 401. 8843044 | 413. 295 | 1295086. 535 |
| M402T75    | 401. 9380398 | 74. 9588 | 23475620. 48 |
| M402T419_1 | 402. 113599  | 418. 97  | 7873138. 432 |
| M402T426   | 402. 1519153 | 425. 909 | 2182177. 736 |
| M402T144   | 402. 1527432 | 143. 959 | 5640799. 527 |
| M402T250   | 402. 1595679 | 250. 144 | 16270044. 57 |
| M402T95    | 402. 15767   | 94. 7467 | 5428046. 173 |
| M402T323   | 402. 1666546 | 322. 536 | 2400288. 674 |



|            |              |          |              |
|------------|--------------|----------|--------------|
| M402T199   | 402. 1728984 | 199. 43  | 11212384. 73 |
| M402T455   | 402. 1794268 | 454. 739 | 2573592. 975 |
| M402T310   | 402. 183069  | 310. 075 | 9729962. 708 |
| M402T331_2 | 402. 186331  | 330. 809 | 3291860. 836 |
| M402T836   | 402. 1960003 | 836. 034 | 66431299. 55 |
| M402T779   | 402. 1941714 | 778. 543 | 8192105. 474 |
| M402T730   | 402. 1959458 | 729. 798 | 11214180. 92 |
| M402T747   | 402. 2026318 | 746. 977 | 5879470. 44  |
| M402T298   | 402. 2054871 | 298. 135 | 3408391. 947 |
| M402T419_2 | 402. 2283373 | 418. 97  | 4826747. 594 |
| M402T82    | 402. 2322587 | 82. 0569 | 10977728. 86 |
| M402T316   | 402. 2382788 | 315. 701 | 3603418. 233 |
| M403T75    | 402. 9353118 | 74. 9588 | 24495817. 83 |
| M403T84    | 402. 9736167 | 83. 5661 | 40779634. 15 |
| M403T348   | 403. 1248268 | 348. 488 | 781435. 8492 |
| M403T190   | 403. 1326593 | 189. 571 | 4941742. 121 |
| M403T270   | 403. 1327961 | 269. 528 | 3720292. 835 |
| M403T199   | 403. 1327201 | 199. 43  | 2360546. 197 |
| M403T258   | 403. 1326114 | 258. 489 | 5003506. 931 |
| M403T329   | 403. 1372197 | 329. 481 | 1127178. 557 |
| M403T780   | 403. 1423897 | 780. 043 | 8835907. 206 |
| M403T309   | 403. 144229  | 308. 967 | 2364857. 726 |
| M403T299   | 403. 1442408 | 299. 493 | 1864207. 945 |
| M403T432   | 403. 1544873 | 431. 64  | 2556004. 358 |
| M403T95    | 403. 1517576 | 94. 7467 | 58631357. 57 |
| M403T106   | 403. 1692072 | 105. 503 | 4472980. 791 |
| M403T584   | 403. 1709806 | 584. 417 | 2865084. 327 |
| M403T350   | 403. 1691712 | 349. 911 | 7227056. 982 |
| M403T691   | 403. 1691598 | 691. 022 | 2608915. 537 |
| M403T698   | 403. 174928  | 697. 952 | 8550757. 1   |
| M403T325   | 403. 1789919 | 325. 35  | 2762124. 89  |
| M403T706   | 403. 1729706 | 706. 229 | 7092205. 424 |
| M403T294   | 403. 1807449 | 293. 896 | 2298952. 102 |
| M403T306   | 403. 1809076 | 306. 247 | 7323986. 343 |
| M403T316   | 403. 1811973 | 315. 701 | 4901935. 772 |
| M403T469   | 403. 1939709 | 469. 252 | 16481693. 75 |
| M403T484   | 403. 1941476 | 483. 973 | 8640456. 294 |
| M403T836   | 403. 197138  | 836. 034 | 7460253. 076 |
| M403T765   | 403. 211648  | 765. 406 | 10578735. 37 |
| M403T545   | 403. 3321264 | 545. 203 | 17444200. 41 |
| M403T589   | 403. 3360374 | 589. 053 | 30359302. 71 |
| M403T827   | 403. 3588898 | 827. 271 | 1813897. 735 |
| M404T309   | 403. 7221812 | 308. 967 | 2242136. 656 |
| M404T164   | 404. 0306192 | 163. 846 | 29965395. 24 |
| M404T358   | 404. 1189354 | 357. 958 | 1281676. 843 |
| M404T389   | 404. 1303311 | 389. 035 | 2124676. 719 |
| M404T780   | 404. 1381125 | 780. 043 | 3165562. 774 |
| M404T420   | 404. 1538146 | 420. 274 | 3843317. 009 |
| M404T106   | 404. 1537085 | 105. 503 | 16598891. 35 |
| M404T357   | 404. 1507941 | 356. 74  | 13288412. 72 |
| M404T311   | 404. 1652639 | 311. 445 | 4131309. 218 |
| M404T339   | 404. 1656353 | 339. 085 | 1073867. 493 |
| M404T423   | 404. 1905129 | 423. 199 | 2355845. 924 |
| M404T469   | 404. 2023679 | 469. 252 | 3277808. 298 |

|            |              |          |              |
|------------|--------------|----------|--------------|
| M404T747   | 404. 2019558 | 746. 977 | 11787515. 22 |
| M404T436   | 404. 2252752 | 436. 069 | 2413461. 957 |
| M404T798   | 404. 2986216 | 797. 773 | 2395178. 671 |
| M405T164_1 | 404. 5334268 | 163. 846 | 7910543. 479 |
| M405T375   | 404. 5510098 | 375. 021 | 2255101. 883 |
| M405T121   | 404. 962018  | 120. 525 | 15838509. 44 |
| M405T113   | 404. 9619637 | 112. 781 | 6746186. 834 |
| M405T84    | 404. 9808252 | 83. 5661 | 3451757. 879 |
| M405T164_2 | 405. 0355798 | 163. 846 | 2225825. 4   |
| M405T765   | 405. 0510896 | 765. 406 | 23896172. 68 |
| M405T588_1 | 405. 1533893 | 587. 521 | 3945134. 265 |
| M405T458   | 405. 172993  | 457. 576 | 3776234. 36  |
| M405T104   | 405. 1843995 | 104. 493 | 3072639. 496 |
| M405T662   | 405. 1902038 | 661. 979 | 10304006. 74 |
| M405T512   | 405. 2115492 | 511. 77  | 1312739. 642 |
| M405T607_1 | 405. 2192537 | 606. 774 | 2648408. 147 |
| M405T422   | 405. 2275094 | 421. 784 | 6118637. 303 |
| M405T799   | 405. 224355  | 799. 089 | 35304774. 65 |
| M405T639_1 | 405. 3478921 | 639. 219 | 71807079. 69 |
| M405T669   | 405. 3478954 | 668. 867 | 462949554. 2 |
| M405T682_1 | 405. 3478696 | 681. 885 | 353403282. 9 |
| M405T524   | 405. 3479427 | 523. 735 | 27445092     |
| M405T702_1 | 405. 3478511 | 702. 055 | 233193055. 9 |
| M405T503   | 405. 3488213 | 503. 046 | 6103852. 11  |
| M405T562_1 | 405. 3479251 | 561. 955 | 3597105442   |
| M405T515   | 405. 3481709 | 514. 727 | 17691884. 74 |
| M405T607_2 | 405. 3483505 | 606. 774 | 68726098. 21 |
| M405T716   | 405. 3480077 | 716. 403 | 88724244. 34 |
| M405T545_1 | 405. 3479672 | 545. 203 | 1217906775   |
| M405T652   | 405. 3480988 | 651. 956 | 59971980. 61 |
| M405T787   | 405. 3479756 | 786. 569 | 25341123. 55 |
| M405T694   | 405. 3479254 | 693. 81  | 334137402. 1 |
| M405T741   | 405. 3481926 | 741. 302 | 86127229. 77 |
| M405T576   | 405. 3480415 | 575. 878 | 228582540. 3 |
| M405T588_2 | 405. 3480921 | 587. 521 | 104445621. 5 |
| M405T639_2 | 405. 358527  | 639. 219 | 32088110. 09 |
| M405T682_2 | 405. 3585152 | 681. 885 | 160977183. 8 |
| M405T702_2 | 405. 3584949 | 702. 055 | 110174240. 3 |
| M405T562_2 | 405. 3585533 | 561. 955 | 1606678132   |
| M405T545_2 | 405. 3586056 | 545. 203 | 537100362. 8 |
| M406T422   | 405. 5578104 | 421. 784 | 3348692. 79  |
| M406T767   | 406. 0540725 | 766. 742 | 5905208. 618 |
| M406T472   | 406. 1588446 | 472. 132 | 1051535. 522 |
| M406T425   | 406. 1622656 | 424. 572 | 8825076. 033 |
| M406T313   | 406. 1801311 | 312. 85  | 1073649. 774 |
| M406T107   | 406. 1801556 | 106. 513 | 10405019. 36 |
| M406T295   | 406. 1802087 | 295. 356 | 2585710. 793 |
| M406T321   | 406. 1801996 | 321. 198 | 924162. 2735 |
| M406T662   | 406. 1918853 | 661. 979 | 1414962. 454 |
| M406T573   | 406. 2190356 | 573. 072 | 2160159. 388 |
| M406T652   | 406. 3508543 | 651. 956 | 16884946. 81 |
| M406T639   | 406. 3529851 | 639. 219 | 21924751. 09 |
| M406T669   | 406. 3529546 | 668. 867 | 152036231    |
| M406T682   | 406. 3529207 | 681. 885 | 114260124. 9 |

|            |              |          |              |
|------------|--------------|----------|--------------|
| M406T702   | 406. 3529191 | 702. 055 | 76464917. 13 |
| M406T562   | 406. 3530112 | 561. 955 | 1157845334   |
| M406T718   | 406. 3528511 | 717. 959 | 28121309. 08 |
| M406T607   | 406. 3529401 | 606. 774 | 21414320. 57 |
| M406T545   | 406. 3530453 | 545. 203 | 399019881. 7 |
| M406T787   | 406. 3528588 | 786. 569 | 8076005. 847 |
| M406T694   | 406. 3530031 | 693. 81  | 109878429    |
| M406T741   | 406. 3529933 | 741. 302 | 23267535. 06 |
| M406T576   | 406. 3528534 | 575. 878 | 74400847. 32 |
| M406T588   | 406. 3577835 | 587. 521 | 27775552. 02 |
| M407T528   | 406. 7397773 | 528. 185 | 4967129. 475 |
| M407T164_1 | 407. 0278058 | 163. 846 | 41658891. 22 |
| M407T767   | 407. 0463883 | 766. 742 | 8654722. 623 |
| M407T164_2 | 407. 0452434 | 163. 846 | 34127580. 67 |
| M407T169   | 407. 0860518 | 169. 221 | 8634304. 261 |
| M407T649_1 | 407. 0969184 | 649. 338 | 1527450. 849 |
| M407T176   | 407. 1078978 | 175. 952 | 1867162. 425 |
| M407T686   | 407. 1134722 | 686. 47  | 937195. 2696 |
| M407T248   | 407. 1136029 | 247. 692 | 13640107. 7  |
| M407T314   | 407. 1613561 | 314. 259 | 807565. 2426 |
| M407T144   | 407. 1640908 | 143. 959 | 1657999. 776 |
| M407T225   | 407. 1758205 | 224. 729 | 3601729. 533 |
| M407T626   | 407. 2012122 | 626. 042 | 36849828. 61 |
| M407T482   | 407. 2031036 | 482. 436 | 54974765. 78 |
| M407T490   | 407. 2322084 | 489. 826 | 1572638. 33  |
| M407T804   | 407. 2420276 | 804. 327 | 3899215. 706 |
| M407T824   | 407. 2381911 | 824. 311 | 7027187. 523 |
| M407T814   | 407. 2381971 | 814. 095 | 8772265. 842 |
| M407T455   | 407. 2380311 | 454. 739 | 6969499. 578 |
| M407T442   | 407. 238125  | 442. 005 | 8242415. 941 |
| M407T549   | 407. 3280801 | 549. 375 | 7878339. 994 |
| M407T562   | 407. 3566633 | 561. 955 | 146304054    |
| M407T830   | 407. 3586888 | 830. 193 | 7297526. 758 |
| M407T813   | 407. 3591644 | 812. 862 | 10030913. 6  |
| M407T838   | 407. 3594614 | 837. 524 | 4852918. 373 |
| M407T32    | 407. 3634497 | 32. 4171 | 1098003. 594 |
| M407T760   | 407. 3581021 | 759. 605 | 16210405. 48 |
| M407T821   | 407. 3594984 | 821. 334 | 8197224. 708 |
| M407T791   | 407. 3667654 | 790. 802 | 151430303. 6 |
| M407T746   | 407. 3668526 | 745. 603 | 52579478. 21 |
| M407T605   | 407. 3672934 | 605. 264 | 26588709. 24 |
| M407T649_2 | 407. 3667223 | 649. 338 | 2394049234   |
| M407T660   | 407. 3666892 | 660. 455 | 765290077. 6 |
| M407T620   | 407. 3667359 | 620. 172 | 99685389. 62 |
| M407T685   | 407. 3669269 | 684. 985 | 126087757. 8 |
| M407T719   | 407. 3666648 | 719. 215 | 556187718. 5 |
| M407T703   | 407. 3667044 | 703. 35  | 2381500113   |
| M407T674   | 407. 366881  | 674. 402 | 190251552. 9 |
| M407T632   | 407. 3666323 | 631. 982 | 219127969. 1 |
| M407T800   | 407. 3666538 | 800. 484 | 51463298. 14 |
| M407T734   | 407. 3667081 | 734. 269 | 175502000. 5 |
| M407T772   | 407. 3666543 | 772. 206 | 220781901. 6 |
| M407T583   | 407. 3667843 | 583. 068 | 11167845. 28 |
| M408T420   | 407. 7146411 | 420. 274 | 2120084. 824 |

|            |              |          |              |
|------------|--------------|----------|--------------|
| M408T406   | 407. 7151676 | 406. 289 | 5476069. 956 |
| M408T147   | 407. 9971336 | 146. 742 | 2186675. 851 |
| M408T155   | 407. 9971871 | 155. 197 | 2123050. 357 |
| M408T164_1 | 408. 0284559 | 163. 846 | 7874382. 202 |
| M408T164_2 | 408. 0401266 | 163. 846 | 5047613. 48  |
| M408T100   | 408. 1091506 | 100. 146 | 6873392. 218 |
| M408T164_3 | 408. 1457313 | 163. 846 | 7204090. 796 |
| M408T332   | 408. 1500116 | 332. 2   | 7980114. 251 |
| M408T144   | 408. 1474452 | 143. 959 | 9199400. 785 |
| M408T294   | 408. 1475866 | 293. 896 | 12713434. 64 |
| M408T306   | 408. 147215  | 306. 247 | 12832314. 48 |
| M408T418   | 408. 1478467 | 417. 676 | 4473374. 84  |
| M408T95    | 408. 1496006 | 94. 7467 | 8893943. 916 |
| M408T104   | 408. 1476371 | 104. 493 | 14725616. 6  |
| M408T814_1 | 408. 1574864 | 814. 095 | 18315190. 5  |
| M408T814_2 | 408. 1779461 | 814. 095 | 6125416. 651 |
| M408T416   | 408. 1835123 | 416. 239 | 4346034. 765 |
| M408T384   | 408. 1866013 | 383. 536 | 6166459. 107 |
| M408T154   | 408. 1958944 | 153. 785 | 2049745. 162 |
| M408T216   | 408. 1965716 | 216. 359 | 3389012. 986 |
| M408T626   | 408. 204204  | 626. 042 | 8188815. 786 |
| M408T613   | 408. 2004641 | 612. 699 | 16276712. 44 |
| M408T482   | 408. 2028178 | 482. 436 | 8315851. 489 |
| M408T502   | 408. 2164181 | 501. 549 | 1037152. 975 |
| M408T456   | 408. 2219196 | 456. 126 | 1229539. 853 |
| M408T579   | 408. 2864281 | 578. 816 | 13493358. 15 |
| M408T814_3 | 408. 3620572 | 814. 095 | 5414698. 823 |
| M408T760   | 408. 3617848 | 759. 605 | 6641461. 988 |
| M408T827   | 408. 3619023 | 827. 271 | 5813675. 391 |
| M408T791   | 408. 3686019 | 790. 802 | 50316605. 1  |
| M408T746   | 408. 368644  | 745. 603 | 16251810. 38 |
| M408T605   | 408. 3687594 | 605. 264 | 9709675. 331 |
| M408T649   | 408. 3685916 | 649. 338 | 787564175. 9 |
| M408T660   | 408. 3685558 | 660. 455 | 246888242    |
| M408T562   | 408. 3679919 | 561. 955 | 37317903. 82 |
| M408T620   | 408. 3686224 | 620. 172 | 31576925. 66 |
| M408T685   | 408. 3686932 | 684. 985 | 44069994. 32 |
| M408T719   | 408. 3684995 | 719. 215 | 176297301. 5 |
| M408T703   | 408. 3685774 | 703. 35  | 771924876. 7 |
| M408T632   | 408. 3684488 | 631. 982 | 72682788. 22 |
| M408T800   | 408. 3687689 | 800. 484 | 17421470. 76 |
| M408T734   | 408. 3685476 | 734. 269 | 61311112. 91 |
| M408T772   | 408. 3685524 | 772. 206 | 70858507. 35 |
| M409T608_1 | 408. 6015931 | 608. 261 | 6303704. 986 |
| M409T147   | 409. 0033238 | 146. 742 | 3733384. 444 |
| M409T164   | 409. 0167903 | 163. 846 | 45140810. 97 |
| M409T278   | 409. 0624252 | 277. 699 | 8796413. 454 |
| M409T608_2 | 409. 1052822 | 608. 261 | 2646127. 029 |
| M409T748   | 409. 1572571 | 748. 486 | 19265105. 26 |
| M409T757   | 409. 1642712 | 757. 001 | 3219588. 455 |
| M409T367   | 409. 1684467 | 366. 514 | 14434505. 4  |
| M409T408   | 409. 1701206 | 407. 724 | 6942200. 831 |
| M409T338   | 409. 1700673 | 337. 767 | 14998110. 48 |
| M409T199   | 409. 1799201 | 199. 43  | 18137211. 44 |

|            |              |          |              |
|------------|--------------|----------|--------------|
| M409T295   | 409. 1783436 | 295. 356 | 5141457. 772 |
| M409T304   | 409. 178108  | 303. 513 | 9428127. 875 |
| M409T452   | 409. 1864006 | 451. 804 | 5020686. 111 |
| M409T347   | 409. 1936584 | 347. 175 | 14284158. 9  |
| M409T788   | 409. 2564961 | 787. 856 | 23945629. 36 |
| M409T579   | 409. 291719  | 578. 816 | 3716927. 929 |
| M409T565   | 409. 3466195 | 564. 534 | 27188658. 1  |
| M409T576   | 409. 3464602 | 575. 878 | 5402778. 088 |
| M409T649_1 | 409. 3719007 | 649. 338 | 106159182    |
| M409T660_1 | 409. 3722379 | 660. 455 | 36097118. 56 |
| M409T719   | 409. 3737899 | 719. 215 | 22199681. 86 |
| M409T703   | 409. 3737071 | 703. 35  | 114348142. 8 |
| M409T734   | 409. 3729767 | 734. 269 | 5105641. 84  |
| M409T635   | 409. 3724062 | 635. 022 | 12391723. 89 |
| M409T813   | 409. 3822126 | 812. 862 | 18815019. 08 |
| M409T649_2 | 409. 3835226 | 649. 338 | 18766003. 41 |
| M409T660_2 | 409. 3835535 | 660. 455 | 3201566. 943 |
| M409T698   | 409. 3853912 | 697. 952 | 28705584. 4  |
| M409T672   | 409. 3836124 | 671. 649 | 5506590. 747 |
| M409T636   | 409. 3833426 | 636. 473 | 41075050. 64 |
| M410T506   | 409. 6787818 | 505. 855 | 4800624. 666 |
| M410T398   | 409. 8520749 | 397. 878 | 3803462. 62  |
| M410T164   | 410. 0211727 | 163. 846 | 6810530. 712 |
| M410T355   | 410. 1393014 | 355. 41  | 2629064. 673 |
| M410T384   | 410. 1352284 | 383. 536 | 3750577. 025 |
| M410T369_1 | 410. 1512528 | 369. 321 | 9992267. 111 |
| M410T320   | 410. 1523034 | 319. 758 | 3512920. 536 |
| M410T102   | 410. 1626218 | 102. 247 | 51430687. 93 |
| M410T342   | 410. 1553518 | 341. 802 | 10075818. 84 |
| M410T309   | 410. 164953  | 308. 967 | 25473408. 58 |
| M410T369_2 | 410. 1649312 | 369. 321 | 1487868. 848 |
| M410T291   | 410. 1649296 | 291. 307 | 4353674. 786 |
| M410T143   | 410. 1647775 | 142. 85  | 11022397. 81 |
| M410T92    | 410. 1631599 | 91. 7174 | 67360222. 2  |
| M410T814   | 410. 1745498 | 814. 095 | 9803215. 407 |
| M410T669   | 410. 1850274 | 668. 867 | 3116017. 064 |
| M410T503   | 410. 1800462 | 503. 046 | 1501046. 682 |
| M410T442   | 410. 1909105 | 442. 005 | 8321425. 801 |
| M410T396   | 410. 1944295 | 396. 415 | 1752148. 99  |
| M410T347   | 410. 1984718 | 347. 175 | 3896076. 616 |
| M410T381   | 410. 2038282 | 380. 63  | 5991404. 997 |
| M410T706   | 410. 2179922 | 706. 229 | 6812139. 545 |
| M410T502   | 410. 2161246 | 501. 549 | 2403134. 041 |
| M410T566   | 410. 3047739 | 565. 79  | 4019779. 289 |
| M410T625   | 410. 3025122 | 624. 608 | 4792110. 595 |
| M410T614   | 410. 3029129 | 614. 215 | 4949557. 602 |
| M410T591   | 410. 307774  | 590. 607 | 7965053. 24  |
| M410T649   | 410. 3807245 | 649. 338 | 11070108. 91 |
| M410T813   | 410. 385553  | 812. 862 | 6987176. 399 |
| M410T636   | 410. 3856308 | 636. 473 | 14408418. 6  |
| M410T697   | 410. 3834841 | 696. 575 | 9613700. 101 |
| M410T32    | 410. 3878771 | 32. 4171 | 2120354. 383 |
| M411T741   | 410. 7029954 | 741. 302 | 6428974. 055 |
| M411T82    | 410. 8432962 | 82. 0569 | 13644427. 38 |

|            |              |          |              |
|------------|--------------|----------|--------------|
| M411T706   | 411. 1116251 | 706. 229 | 45147933. 33 |
| M411T625   | 411. 1139644 | 624. 608 | 37811941. 07 |
| M411T715   | 411. 1117534 | 715. 011 | 24730349. 68 |
| M411T659   | 411. 109866  | 658. 953 | 262766256. 9 |
| M411T613   | 411. 1378421 | 612. 699 | 3134951. 335 |
| M411T595   | 411. 1489851 | 595. 066 | 3350601. 47  |
| M411T385   | 411. 1755928 | 385. 081 | 1578731. 866 |
| M411T740   | 411. 1922241 | 740. 014 | 3882525. 355 |
| M411T384   | 411. 1869296 | 383. 536 | 14853980. 67 |
| M411T359   | 411. 2138985 | 359. 32  | 3022878. 671 |
| M411T379   | 411. 4582994 | 379. 194 | 4397789. 145 |
| M412T741   | 411. 6975313 | 741. 302 | 8287929. 989 |
| M412T706   | 412. 1117264 | 706. 229 | 6770460. 38  |
| M412T715   | 412. 1192603 | 715. 011 | 2582108. 131 |
| M412T659   | 412. 1136651 | 658. 953 | 44788498. 8  |
| M412T381   | 412. 1232549 | 380. 63  | 3506535. 585 |
| M412T92    | 412. 1435213 | 91. 7174 | 5038845. 411 |
| M412T98    | 412. 1435223 | 97. 7824 | 10777530. 11 |
| M412T106   | 412. 1434929 | 105. 503 | 7934121. 288 |
| M412T379   | 412. 169569  | 379. 194 | 934415. 0933 |
| M412T95    | 412. 1792532 | 94. 7467 | 22144383. 56 |
| M412T104   | 412. 1794636 | 104. 493 | 30267834. 14 |
| M412T332   | 412. 1832499 | 332. 2   | 3982058. 598 |
| M412T293   | 412. 1822205 | 292. 623 | 6144499. 951 |
| M412T814   | 412. 181519  | 814. 095 | 4606983. 924 |
| M412T445   | 412. 1871026 | 444. 725 | 2285048. 113 |
| M412T341   | 412. 1828246 | 340. 548 | 4304457. 324 |
| M412T535   | 412. 2010209 | 535. 329 | 25126616. 52 |
| M412T430   | 412. 2216655 | 430. 131 | 6467495. 992 |
| M412T676_1 | 412. 2307858 | 675. 866 | 766434757. 1 |
| M412T698   | 412. 2309947 | 697. 952 | 8653365. 799 |
| M412T676_2 | 412. 2444559 | 675. 866 | 35512397. 39 |
| M412T429   | 412. 2519826 | 428. 735 | 231145. 6104 |
| M412T563   | 412. 3176234 | 563. 297 | 30428590. 37 |
| M412T580   | 412. 3180508 | 580. 22  | 10092183. 45 |
| M412T601   | 412. 3170478 | 601. 04  | 39044167. 19 |
| M412T652   | 412. 3179265 | 651. 956 | 7784815. 954 |
| M413T802   | 412. 7291402 | 801. 685 | 3650825. 972 |
| M413T653   | 413. 1211594 | 653. 147 | 6032025. 734 |
| M413T673   | 413. 1380227 | 672. 956 | 3601535. 186 |
| M413T394   | 413. 1375734 | 393. 934 | 5611722. 751 |
| M413T613   | 413. 1530995 | 612. 699 | 8778030. 155 |
| M413T785_1 | 413. 1635126 | 785. 136 | 6622011. 209 |
| M413T788   | 413. 1915412 | 787. 856 | 5795570. 839 |
| M413T314   | 413. 1919606 | 314. 259 | 1211393. 055 |
| M413T386   | 413. 2011598 | 386. 352 | 3167769. 286 |
| M413T76    | 413. 2110221 | 76. 0874 | 24169833. 16 |
| M413T482   | 413. 2152523 | 482. 436 | 1813554. 179 |
| M413T462   | 413. 2236421 | 461. 845 | 4019434. 419 |
| M413T785_2 | 413. 3025541 | 785. 136 | 5058049. 362 |
| M413T474   | 413. 3024047 | 473. 597 | 5403750. 931 |
| M413T796   | 413. 3045616 | 796. 474 | 9888718. 964 |
| M413T418   | 413. 3009285 | 417. 676 | 2247463. 527 |
| M413T552   | 413. 3027007 | 552. 452 | 3025311. 045 |

|            |              |          |              |
|------------|--------------|----------|--------------|
| M413T762   | 413. 3006252 | 762. 439 | 32905588. 14 |
| M413T573   | 413. 3045268 | 573. 072 | 5007846. 487 |
| M413T817   | 413. 3025343 | 816. 953 | 47403224. 34 |
| M413T565   | 413. 3205044 | 564. 534 | 10334672. 76 |
| M413T601   | 413. 3222869 | 601. 04  | 10930287. 2  |
| M414T461   | 413. 7269646 | 460. 537 | 1980487. 935 |
| M414T754   | 414. 060749  | 753. 987 | 4733411. 692 |
| M414T554   | 414. 1366774 | 553. 936 | 1600570. 37  |
| M414T452   | 414. 1523539 | 451. 804 | 16925341. 71 |
| M414T438   | 414. 1525466 | 437. 571 | 22572333. 72 |
| M414T785   | 414. 1548793 | 785. 136 | 7499161. 332 |
| M414T293   | 414. 1585502 | 292. 623 | 5879064. 349 |
| M414T108   | 414. 1585467 | 107. 537 | 73420528. 32 |
| M414T139   | 414. 1527592 | 138. 766 | 11675345. 89 |
| M414T94    | 414. 1584553 | 93. 7378 | 186752459. 6 |
| M414T465   | 414. 1727999 | 464. 668 | 2574356. 069 |
| M414T100   | 414. 1924924 | 100. 146 | 37131286. 72 |
| M414T803   | 414. 2123215 | 802. 88  | 3511148. 276 |
| M414T676   | 414. 2350594 | 675. 866 | 18511861. 33 |
| M414T764   | 414. 3046888 | 763. 856 | 9659496. 059 |
| M414T625   | 414. 3254768 | 624. 608 | 242540941    |
| M414T545   | 414. 3322142 | 545. 203 | 32149205. 59 |
| M414T605   | 414. 3362976 | 605. 264 | 317946786. 2 |
| M414T636   | 414. 3364061 | 636. 473 | 691190028. 6 |
| M414T623   | 414. 3364711 | 623. 11  | 1056550762   |
| M414T838   | 414. 3924723 | 837. 524 | 3459709. 931 |
| M414T32    | 414. 3904165 | 32. 4171 | 4000468. 185 |
| M415T372_1 | 414. 5625601 | 372. 152 | 9271488. 726 |
| M415T416   | 414. 762903  | 416. 239 | 3502836. 108 |
| M415T372_2 | 414. 8955545 | 372. 152 | 2450722. 954 |
| M415T798_1 | 414. 9370396 | 797. 773 | 3945319. 194 |
| M415T359   | 415. 0515063 | 359. 32  | 2686028. 332 |
| M415T439   | 415. 1561428 | 439. 021 | 5697561. 363 |
| M415T95    | 415. 1615062 | 94. 7467 | 25532732. 24 |
| M415T582_1 | 415. 1714369 | 581. 625 | 6917895. 885 |
| M415T106   | 415. 1707748 | 105. 503 | 7099762. 315 |
| M415T154   | 415. 1711648 | 153. 785 | 2959596. 127 |
| M415T379   | 415. 1695456 | 379. 194 | 3460289. 395 |
| M415T765   | 415. 175959  | 765. 406 | 7855128. 705 |
| M415T838   | 415. 1735581 | 837. 524 | 11033979. 45 |
| M415T332   | 415. 181946  | 332. 2   | 6188886. 211 |
| M415T323   | 415. 1818646 | 322. 536 | 15690622. 62 |
| M415T398   | 415. 19475   | 397. 878 | 1118193. 01  |
| M415T708   | 415. 2012046 | 707. 557 | 2199262. 176 |
| M415T798_2 | 415. 1957452 | 797. 773 | 553744634    |
| M415T829_1 | 415. 2077096 | 828. 73  | 107137701. 9 |
| M415T811_1 | 415. 2076202 | 811. 413 | 128374024. 4 |
| M415T818_1 | 415. 207652  | 818. 418 | 75939137. 2  |
| M415T425   | 415. 2037628 | 424. 572 | 5399435. 926 |
| M415T798_3 | 415. 2076283 | 797. 773 | 4535315037   |
| M415T829_2 | 415. 22207   | 828. 73  | 14806916. 12 |
| M415T811_2 | 415. 2224477 | 811. 413 | 17027514. 19 |
| M415T818_2 | 415. 2221672 | 818. 418 | 10193776. 58 |
| M415T798_4 | 415. 2217389 | 797. 773 | 614834742    |

|            |              |          |              |
|------------|--------------|----------|--------------|
| M415T521   | 415. 2317729 | 520. 739 | 6109913. 197 |
| M415T392   | 415. 2538632 | 391. 678 | 8858860. 99  |
| M415T582_2 | 415. 3178944 | 581. 625 | 5851751. 895 |
| M415T538   | 415. 3180862 | 538. 316 | 4001905. 698 |
| M415T568   | 415. 3176842 | 568. 464 | 2686448. 101 |
| M415T528   | 415. 3177671 | 528. 185 | 6294824. 205 |
| M415T655   | 415. 3180092 | 654. 542 | 3756230. 843 |
| M415T605   | 415. 3379712 | 605. 264 | 90460690. 36 |
| M415T623   | 415. 338145  | 623. 11  | 308674498. 3 |
| M415T636   | 415. 3380867 | 636. 473 | 202174134. 5 |
| M416T425   | 415. 704251  | 424. 572 | 1986496. 914 |
| M416T403   | 415. 7457361 | 403. 447 | 3122108. 293 |
| M416T308   | 416. 1079335 | 307. 735 | 7146525. 344 |
| M416T106   | 416. 1520474 | 105. 503 | 13153565. 4  |
| M416T381   | 416. 1538693 | 380. 63  | 7594032. 728 |
| M416T440   | 416. 1572287 | 440. 459 | 3527714. 662 |
| M416T205   | 416. 164155  | 204. 747 | 3589836. 844 |
| M416T389   | 416. 1681115 | 389. 035 | 6518937. 249 |
| M416T249   | 416. 1642273 | 248. 895 | 2756607. 644 |
| M416T295   | 416. 1661399 | 295. 356 | 2603941. 55  |
| M416T95    | 416. 1745488 | 94. 7467 | 9603482. 672 |
| M416T178   | 416. 1742557 | 178. 408 | 5326066. 881 |
| M416T582   | 416. 1788341 | 581. 625 | 671262. 1326 |
| M416T347   | 416. 1904453 | 347. 175 | 50828123. 39 |
| M416T829_1 | 416. 2044836 | 828. 73  | 12947195. 78 |
| M416T811   | 416. 2085797 | 811. 413 | 25698681. 41 |
| M416T818   | 416. 2084898 | 818. 418 | 14547706. 77 |
| M416T798_1 | 416. 2084167 | 797. 773 | 912262426. 4 |
| M416T829_2 | 416. 2175455 | 828. 73  | 24322775. 99 |
| M416T798_2 | 416. 2194886 | 797. 773 | 776004629. 7 |
| M416T477   | 416. 2303759 | 476. 554 | 7831639. 768 |
| M416T448   | 416. 288136  | 447. 531 | 6153674. 877 |
| M416T645   | 416. 2971722 | 645. 278 | 3386452. 523 |
| M416T528   | 416. 3227972 | 528. 185 | 727370. 2858 |
| M416T623   | 416. 3376411 | 623. 11  | 37458904. 43 |
| M416T636   | 416. 3374948 | 636. 473 | 28144683. 47 |
| M416T611   | 416. 3367179 | 611. 145 | 5401876. 234 |
| M416T589_1 | 416. 3375537 | 589. 053 | 89403124. 89 |
| M416T663_1 | 416. 3493373 | 663. 287 | 671058091. 9 |
| M416T613   | 416. 3494961 | 612. 699 | 84927416. 78 |
| M416T589_2 | 416. 3492568 | 589. 053 | 666833354. 8 |
| M416T663_2 | 416. 3614196 | 663. 287 | 37129740. 3  |
| M416T642   | 416. 3605133 | 642. 211 | 12831673. 87 |
| M416T589_3 | 416. 3608193 | 589. 053 | 69549777. 68 |
| M417T163_1 | 417. 012817  | 162. 728 | 4230970. 679 |
| M417T171   | 417. 1479153 | 170. 665 | 6606163. 383 |
| M417T482   | 417. 1719887 | 482. 436 | 4316014. 834 |
| M417T494   | 417. 1723299 | 494. 289 | 12251643. 27 |
| M417T465   | 417. 1825172 | 464. 668 | 9459638. 281 |
| M417T369   | 417. 1846458 | 369. 321 | 22902398. 7  |
| M417T764   | 417. 1888502 | 763. 856 | 16994488. 6  |
| M417T682   | 417. 1886267 | 681. 885 | 43984669. 69 |
| M417T666   | 417. 1885427 | 666. 137 | 8269141. 947 |
| M417T310   | 417. 1841178 | 310. 075 | 8013079. 709 |



|            |              |          |              |
|------------|--------------|----------|--------------|
| M417T814   | 417. 1888107 | 814. 095 | 35227199. 15 |
| M417T744   | 417. 1886094 | 744. 182 | 114584266. 5 |
| M417T792   | 417. 1887024 | 792. 146 | 26983886. 75 |
| M417T348   | 417. 1928026 | 348. 488 | 10436683. 57 |
| M417T478   | 417. 1967441 | 477. 989 | 10534227. 81 |
| M417T163_2 | 417. 1997232 | 162. 728 | 6447791. 806 |
| M417T230   | 417. 1996649 | 230. 321 | 10882420. 1  |
| M417T180   | 417. 1996124 | 179. 75  | 18186087. 89 |
| M417T106   | 417. 1997758 | 105. 503 | 38651318. 46 |
| M417T143   | 417. 1996115 | 142. 85  | 13001521. 44 |
| M417T287   | 417. 1996187 | 287. 148 | 15831927. 76 |
| M417T191   | 417. 1997018 | 190. 962 | 21239076. 69 |
| M417T317   | 417. 1998294 | 317. 199 | 6139859. 779 |
| M417T798   | 417. 2128334 | 797. 773 | 170922071. 6 |
| M417T446   | 417. 2292169 | 445. 984 | 23843238. 88 |
| M417T803   | 417. 2387104 | 802. 88  | 10823572. 08 |
| M417T555   | 417. 3319964 | 555. 358 | 14490620. 1  |
| M417T629   | 417. 3317    | 629. 015 | 8018575. 086 |
| M417T663   | 417. 3543179 | 663. 287 | 194822681. 4 |
| M417T589   | 417. 3521591 | 589. 053 | 192875304    |
| M418T478   | 417. 7000131 | 477. 989 | 5016104. 173 |
| M418T106_1 | 418. 1316477 | 105. 503 | 5953031. 894 |
| M418T372   | 418. 1661337 | 372. 152 | 5919674. 32  |
| M418T165   | 418. 1663736 | 165. 217 | 8758389. 002 |
| M418T381   | 418. 1661517 | 380. 63  | 13017514. 73 |
| M418T123   | 418. 1681156 | 123. 262 | 13956358. 36 |
| M418T192   | 418. 168135  | 192. 437 | 51060872. 19 |
| M418T151   | 418. 1682023 | 151. 016 | 18460856. 14 |
| M418T216   | 418. 1682076 | 216. 359 | 12353688. 12 |
| M418T175   | 418. 168282  | 174. 865 | 8749001. 393 |
| M418T198   | 418. 1782779 | 198. 072 | 114550002. 6 |
| M418T271   | 418. 17837   | 270. 983 | 13259393. 83 |
| M418T106_2 | 418. 1783244 | 105. 503 | 36480847. 79 |
| M418T119   | 418. 1830381 | 119. 433 | 21517419. 58 |
| M418T163   | 418. 1824579 | 162. 728 | 95447788. 89 |
| M418T144   | 418. 182466  | 143. 959 | 36763442. 5  |
| M418T335   | 418. 182939  | 334. 966 | 11474987. 74 |
| M418T248   | 418. 1839598 | 247. 692 | 17652961. 35 |
| M418T218   | 418. 1783364 | 217. 866 | 43518444. 89 |
| M418T305   | 418. 1825989 | 304. 777 | 82636322. 04 |
| M418T369   | 418. 1891443 | 369. 321 | 3486872. 856 |
| M418T682   | 418. 192583  | 681. 885 | 10328332. 77 |
| M418T814   | 418. 1905877 | 814. 095 | 7998961. 642 |
| M418T744   | 418. 1904441 | 744. 182 | 24861031. 31 |
| M418T798   | 418. 1956668 | 797. 773 | 4932682. 653 |
| M418T419   | 418. 2101426 | 418. 97  | 14061918. 23 |
| M418T708   | 418. 2208985 | 707. 557 | 8413487. 331 |
| M418T390   | 418. 226435  | 390. 432 | 2570648. 942 |
| M418T809   | 418. 2411566 | 808. 678 | 2163655. 568 |
| M418T374   | 418. 2416965 | 373. 532 | 2371134. 943 |
| M418T663   | 418. 3622735 | 663. 287 | 15909204. 9  |
| M419T84    | 418. 9478901 | 83. 5661 | 62290793. 18 |
| M419T328   | 419. 1289968 | 328. 106 | 3306674. 382 |
| M419T512   | 419. 1291816 | 511. 77  | 3771893. 661 |

|            |              |          |              |
|------------|--------------|----------|--------------|
| M419T462   | 419. 1481847 | 461. 845 | 18100868. 97 |
| M419T567   | 419. 1653836 | 567. 1   | 84849280. 37 |
| M419T190   | 419. 1732717 | 189. 571 | 2816970. 452 |
| M419T218   | 419. 1840481 | 217. 866 | 6224222. 443 |
| M419T521   | 419. 1837346 | 520. 739 | 22583027. 43 |
| M419T750   | 419. 2072232 | 749. 96  | 6004026. 672 |
| M419T730   | 419. 2073477 | 729. 798 | 18668039. 21 |
| M419T403   | 419. 2081317 | 403. 447 | 14694394. 04 |
| M419T80    | 419. 230958  | 79. 643  | 4250965. 121 |
| M419T485   | 419. 3282605 | 485. 471 | 21330423. 81 |
| M419T589   | 419. 3642294 | 589. 053 | 1905623. 712 |
| M420T816   | 419. 8133175 | 815. 517 | 2420495. 455 |
| M420T123   | 420. 1010129 | 123. 262 | 12370610. 75 |
| M420T113   | 420. 1010244 | 112. 781 | 7503579. 367 |
| M420T462   | 420. 1526949 | 461. 845 | 2343855. 691 |
| M420T449   | 420. 1626546 | 448. 978 | 3472379. 271 |
| M420T438   | 420. 1619881 | 437. 571 | 2433495. 508 |
| M420T439   | 420. 180636  | 439. 021 | 7991713. 777 |
| M420T357   | 420. 1865535 | 356. 74  | 3849329. 245 |
| M420T309   | 420. 196884  | 308. 967 | 1977154. 664 |
| M420T106   | 420. 1969026 | 105. 503 | 4099044. 225 |
| M420T318   | 420. 1968943 | 318. 497 | 1803453. 72  |
| M420T698   | 420. 198786  | 697. 952 | 1020850. 922 |
| M420T682   | 420. 2052146 | 681. 885 | 2965179. 438 |
| M420T565   | 420. 2233114 | 564. 534 | 12101195. 34 |
| M420T673   | 420. 2337507 | 672. 956 | 17371021. 41 |
| M421T420_1 | 420. 730368  | 420. 274 | 7224732. 269 |
| M421T81    | 420. 800036  | 80. 824  | 4246582. 271 |
| M421T84_1  | 420. 9493914 | 83. 5661 | 18884165. 89 |
| M421T84_2  | 420. 9598933 | 83. 5661 | 2710462. 331 |
| M421T567   | 421. 1713664 | 567. 1   | 1461813. 441 |
| M421T203   | 421. 176982  | 203. 36  | 16170108. 9  |
| M421T124   | 421. 1831729 | 124. 487 | 3584957. 888 |
| M421T102   | 421. 1911307 | 102. 247 | 4506247. 16  |
| M421T94    | 421. 1912478 | 93. 7378 | 9573533. 534 |
| M421T746   | 421. 2200772 | 745. 603 | 5134898. 31  |
| M421T695   | 421. 2198638 | 695. 155 | 3218117. 907 |
| M421T420_2 | 421. 2299915 | 420. 274 | 3363755. 435 |
| M421T673   | 421. 2402476 | 672. 956 | 4167263. 728 |
| M421T597   | 421. 308077  | 596. 628 | 5461447. 336 |
| M421T622   | 421. 3449759 | 621. 708 | 35373137. 15 |
| M421T566   | 421. 3449945 | 565. 79  | 18075569. 41 |
| M421T461   | 421. 3449497 | 460. 537 | 24527430. 55 |
| M421T554   | 421. 3448629 | 553. 936 | 28717985. 78 |
| M421T580   | 421. 3448454 | 580. 22  | 90605726. 22 |
| M421T545   | 421. 3450556 | 545. 203 | 47048828. 68 |
| M421T589   | 421. 3447827 | 589. 053 | 51606958. 9  |
| M421T525   | 421. 3449435 | 525. 132 | 13692039. 64 |
| M421T677   | 421. 3420863 | 677. 376 | 8514363. 552 |
| M421T718   | 421. 3475324 | 717. 959 | 7551617. 658 |
| M422T299   | 422. 1211305 | 299. 493 | 2498564. 139 |
| M422T104   | 422. 1666048 | 104. 493 | 33971747. 46 |
| M422T168   | 422. 1729879 | 167. 804 | 5021190. 021 |
| M422T496   | 422. 201395  | 495. 779 | 1197662. 668 |

|            |              |          |              |
|------------|--------------|----------|--------------|
| M422T293   | 422. 2095425 | 292. 623 | 5164291. 739 |
| M422T310   | 422. 213751  | 310. 075 | 3533892. 944 |
| M422T301   | 422. 2140379 | 300. 782 | 8726329. 283 |
| M422T662   | 422. 2157454 | 661. 979 | 37680937. 07 |
| M422T481   | 422. 232396  | 481. 042 | 5893058. 79  |
| M422T488   | 422. 2322859 | 488. 437 | 11394656. 84 |
| M422T669   | 422. 3064449 | 668. 867 | 8221096. 351 |
| M422T803   | 422. 3189017 | 802. 88  | 25696572. 17 |
| M422T582   | 422. 3473103 | 581. 625 | 29304379. 68 |
| M422T622   | 422. 3473345 | 621. 708 | 8828285. 66  |
| M422T461   | 422. 3473272 | 460. 537 | 7146949. 342 |
| M422T589   | 422. 3472611 | 589. 053 | 16929349. 58 |
| M422T545   | 422. 347636  | 545. 203 | 27118375. 86 |
| M423T167   | 423. 0070312 | 166. 613 | 25748648. 82 |
| M423T163   | 423. 0874365 | 162. 728 | 9189517. 552 |
| M423T293   | 423. 0903272 | 292. 623 | 4464542. 876 |
| M423T92    | 423. 0913758 | 91. 7174 | 58159195. 19 |
| M423T118   | 423. 0874818 | 118. 116 | 28540419. 12 |
| M423T107   | 423. 0872375 | 106. 513 | 71197709. 93 |
| M423T103   | 423. 1100208 | 103. 423 | 6646142. 353 |
| M423T838   | 423. 1738862 | 837. 524 | 12262812. 99 |
| M423T409   | 423. 1839699 | 409. 271 | 3656136. 241 |
| M423T399   | 423. 184356  | 399. 046 | 4024113. 648 |
| M423T388   | 423. 1844411 | 387. 763 | 6297501. 049 |
| M423T324   | 423. 1888682 | 323. 984 | 9278804. 226 |
| M423T493   | 423. 1945037 | 492. 895 | 4292073. 662 |
| M423T305   | 423. 1945152 | 304. 777 | 5786138. 567 |
| M423T394   | 423. 2170503 | 393. 934 | 10854642. 37 |
| M423T439   | 423. 2235148 | 439. 021 | 18012644. 54 |
| M423T741   | 423. 2211562 | 741. 302 | 12170737. 8  |
| M423T777   | 423. 2329532 | 777. 245 | 7522496. 14  |
| M423T449   | 423. 320523  | 448. 978 | 6363958. 165 |
| M423T597   | 423. 322721  | 596. 628 | 2688946. 678 |
| M423T702_1 | 423. 349356  | 702. 055 | 359280847. 4 |
| M423T694_1 | 423. 3483421 | 693. 81  | 524986223. 4 |
| M423T588_1 | 423. 353472  | 587. 521 | 123710974. 1 |
| M423T829   | 423. 3597839 | 828. 73  | 37238227. 53 |
| M423T787   | 423. 3597053 | 786. 569 | 90365042. 99 |
| M423T639   | 423. 3597602 | 639. 219 | 128193077. 2 |
| M423T780   | 423. 3597264 | 780. 043 | 51313484. 93 |
| M423T669   | 423. 3597086 | 668. 867 | 1734779901   |
| M423T682   | 423. 3597131 | 681. 885 | 1308895550   |
| M423T524   | 423. 3596918 | 523. 735 | 105259629. 5 |
| M423T503   | 423. 3597751 | 503. 046 | 24686783. 28 |
| M423T562   | 423. 3597642 | 561. 955 | 13301236306  |
| M423T728   | 423. 359739  | 728. 25  | 93668386. 7  |
| M423T765   | 423. 3597992 | 765. 406 | 70209319. 54 |
| M423T718   | 423. 3596175 | 717. 959 | 367720765. 8 |
| M423T515   | 423. 3596716 | 514. 727 | 71037097. 09 |
| M423T607   | 423. 3596504 | 606. 774 | 257094363. 1 |
| M423T740   | 423. 3596953 | 740. 014 | 193567093. 2 |
| M423T753   | 423. 3597456 | 752. 541 | 66547378. 5  |
| M423T545   | 423. 3598228 | 545. 203 | 4875314472   |
| M423T653   | 423. 3595582 | 653. 147 | 176587767    |

|            |              |          |              |
|------------|--------------|----------|--------------|
| M423T576   | 423. 3595849 | 575. 878 | 839812344. 2 |
| M423T702_2 | 423. 3596818 | 702. 055 | 858184966. 6 |
| M423T694_2 | 423. 359767  | 693. 81  | 1195277120   |
| M423T588_2 | 423. 3637923 | 587. 521 | 352481050    |
| M424T393   | 423. 5479038 | 392. 715 | 4661874. 414 |
| M424T601   | 423. 6075345 | 601. 04  | 1797387. 476 |
| M424T741   | 423. 7254329 | 741. 302 | 7021845. 601 |
| M424T703   | 423. 7336034 | 703. 35  | 5684766. 536 |
| M424T74    | 423. 9512857 | 73. 8324 | 99156516. 22 |
| M424T430   | 424. 1702858 | 430. 131 | 1791017. 668 |
| M424T163   | 424. 1780819 | 162. 728 | 8425209. 472 |
| M424T214   | 424. 1769621 | 213. 872 | 3847951. 303 |
| M424T299   | 424. 1787689 | 299. 493 | 3766869. 735 |
| M424T347   | 424. 1789225 | 347. 175 | 12665236. 26 |
| M424T108   | 424. 1807864 | 107. 537 | 8856783. 209 |
| M424T324   | 424. 1881349 | 323. 984 | 2340460. 842 |
| M424T626   | 424. 2306888 | 626. 042 | 14316988. 68 |
| M424T533   | 424. 2822172 | 532. 526 | 5263040. 873 |
| M424T521   | 424. 2821411 | 520. 739 | 6393154. 658 |
| M424T582   | 424. 3173756 | 581. 625 | 4027078. 255 |
| M424T787   | 424. 3631571 | 786. 569 | 30695227. 53 |
| M424T639   | 424. 3632157 | 639. 219 | 47716544. 27 |
| M424T780   | 424. 3632753 | 780. 043 | 16156078. 69 |
| M424T669   | 424. 363168  | 668. 867 | 582728390. 3 |
| M424T462   | 424. 3672885 | 461. 845 | 2530919. 97  |
| M424T682   | 424. 363183  | 681. 885 | 432375523. 8 |
| M424T524   | 424. 3631682 | 523. 735 | 34048537. 73 |
| M424T702   | 424. 3631352 | 702. 055 | 265965723. 1 |
| M424T562   | 424. 363233  | 561. 955 | 4348619013   |
| M424T728   | 424. 3631754 | 728. 25  | 30120431. 69 |
| M424T765   | 424. 3614303 | 765. 406 | 22537105. 29 |
| M424T718   | 424. 363039  | 717. 959 | 119308819    |
| M424T515   | 424. 3631215 | 514. 727 | 22897137. 83 |
| M424T607   | 424. 3630735 | 606. 774 | 83957097. 81 |
| M424T740   | 424. 3631353 | 740. 014 | 60362119. 45 |
| M424T753   | 424. 3632092 | 752. 541 | 24095498. 94 |
| M424T545   | 424. 3632805 | 545. 203 | 1575045675   |
| M424T652   | 424. 3630113 | 651. 956 | 57876493. 32 |
| M424T694   | 424. 3632293 | 693. 81  | 388814942. 1 |
| M424T576   | 424. 3630747 | 575. 878 | 271704421. 2 |
| M424T588   | 424. 3630841 | 587. 521 | 129563095. 7 |
| M425T772_1 | 424. 7488969 | 772. 206 | 4019187. 337 |
| M425T75    | 424. 9525216 | 74. 9588 | 56086564. 98 |
| M425T278   | 425. 038907  | 277. 699 | 2206740. 3   |
| M425T649_1 | 425. 0914083 | 649. 338 | 1866240. 785 |
| M425T294   | 425. 1081712 | 293. 896 | 6443391. 719 |
| M425T151   | 425. 1101748 | 151. 016 | 6832468. 955 |
| M425T187   | 425. 1105579 | 186. 709 | 13553996. 78 |
| M425T203   | 425. 1105962 | 203. 36  | 7344358. 332 |
| M425T258   | 425. 1103084 | 258. 489 | 9222327. 293 |
| M425T310   | 425. 1642906 | 310. 075 | 6106972. 452 |
| M425T491   | 425. 1685552 | 491. 373 | 1561759. 111 |
| M425T582   | 425. 1768268 | 581. 625 | 4242963. 608 |
| M425T449   | 425. 1798151 | 448. 978 | 1470669. 8   |

|            |              |          |              |
|------------|--------------|----------|--------------|
| M425T453   | 425. 1914619 | 453. 317 | 4470167. 057 |
| M425T253   | 425. 1894099 | 253. 024 | 10241380. 75 |
| M425T626   | 425. 2315656 | 626. 042 | 2831559. 642 |
| M425T706   | 425. 2476024 | 706. 229 | 6543080. 28  |
| M425T533_1 | 425. 2891515 | 532. 526 | 1623477. 206 |
| M425T821   | 425. 2875941 | 821. 334 | 10142593. 35 |
| M425T541   | 425. 3392647 | 541. 275 | 3095419. 483 |
| M425T533_2 | 425. 3387686 | 532. 526 | 5262373. 022 |
| M425T458   | 425. 3411093 | 457. 576 | 28966682. 89 |
| M425T549   | 425. 33732   | 549. 375 | 6408942. 888 |
| M425T448   | 425. 3412214 | 447. 531 | 5951384. 83  |
| M425T829   | 425. 3719854 | 828. 73  | 15074414. 32 |
| M425T746   | 425. 372513  | 745. 603 | 23935708. 67 |
| M425T605   | 425. 3715232 | 605. 264 | 21177312. 59 |
| M425T669   | 425. 3710111 | 668. 867 | 144196155. 7 |
| M425T562   | 425. 3676756 | 561. 955 | 638956866. 4 |
| M425T683   | 425. 3716197 | 683. 436 | 73420556. 88 |
| M425T586   | 425. 3673845 | 585. 968 | 19200884. 83 |
| M425T545   | 425. 3664725 | 545. 203 | 244054561. 7 |
| M425T576   | 425. 3678689 | 575. 878 | 38480646. 35 |
| M425T761   | 425. 371921  | 760. 916 | 20497114. 32 |
| M425T791   | 425. 3764893 | 790. 802 | 88575278. 61 |
| M425T649_2 | 425. 3764893 | 649. 338 | 2557462906   |
| M425T620   | 425. 376543  | 620. 172 | 86915158. 51 |
| M425T736   | 425. 3764772 | 735. 7   | 117437919. 6 |
| M425T719   | 425. 3763029 | 719. 215 | 261920618    |
| M425T703   | 425. 376427  | 703. 35  | 2169307864   |
| M425T632   | 425. 3763804 | 631. 982 | 203764510. 5 |
| M425T802   | 425. 3764833 | 801. 685 | 74329280. 45 |
| M425T772_2 | 425. 3764867 | 772. 206 | 100304923. 4 |
| M425T685   | 425. 3832421 | 684. 985 | 59311422. 42 |
| M425T674   | 425. 3828793 | 674. 402 | 48910414. 35 |
| M426T187   | 425. 6115524 | 186. 709 | 4479599. 565 |
| M426T506   | 425. 724437  | 505. 855 | 1635351. 92  |
| M426T75    | 425. 9467    | 74. 9588 | 45319816. 64 |
| M426T279   | 426. 053372  | 279. 039 | 1250975. 367 |
| M426T616   | 426. 1137975 | 615. 594 | 14839526. 25 |
| M426T777   | 426. 111429  | 777. 245 | 1352253. 47  |
| M426T161   | 426. 1266838 | 161. 494 | 101826384. 7 |
| M426T332   | 426. 1597907 | 332. 2   | 5474035. 631 |
| M426T106   | 426. 1576167 | 105. 503 | 42532340. 24 |
| M426T143   | 426. 1572171 | 142. 85  | 9314075. 056 |
| M426T96    | 426. 1575888 | 95. 7572 | 166895632. 5 |
| M426T345   | 426. 1738642 | 344. 555 | 3016532. 097 |
| M426T706   | 426. 1931271 | 706. 229 | 17158458. 89 |
| M426T309   | 426. 2076341 | 308. 967 | 1524908. 691 |
| M426T427   | 426. 2324181 | 427. 362 | 2001743. 397 |
| M426T605   | 426. 2391534 | 605. 264 | 1951143. 317 |
| M426T594   | 426. 2367408 | 593. 62  | 5562819. 872 |
| M426T716   | 426. 2531934 | 716. 403 | 10179493. 36 |
| M426T741   | 426. 2623014 | 741. 302 | 6554054. 037 |
| M426T557   | 426. 2973969 | 556. 816 | 20321023. 09 |
| M426T534   | 426. 299506  | 533. 958 | 48244165. 23 |
| M426T572   | 426. 2993572 | 571. 523 | 21846758. 08 |

|            |              |          |              |
|------------|--------------|----------|--------------|
| M426T588   | 426. 2994251 | 587. 521 | 29660622. 73 |
| M426T620   | 426. 3348136 | 620. 172 | 39541376. 95 |
| M426T635   | 426. 3347969 | 635. 022 | 9642439. 671 |
| M426T562_1 | 426. 3699811 | 561. 955 | 39024689. 32 |
| M426T802   | 426. 3766806 | 801. 685 | 20863672. 28 |
| M426T649   | 426. 3784434 | 649. 338 | 819891494. 9 |
| M426T562_2 | 426. 3809662 | 561. 955 | 39411522. 43 |
| M426T719   | 426. 3782996 | 719. 215 | 84626439. 1  |
| M426T703   | 426. 3786077 | 703. 35  | 711814700. 8 |
| M426T632   | 426. 3785094 | 631. 982 | 64926191. 28 |
| M426T791   | 426. 3858183 | 790. 802 | 10856153. 83 |
| M427T158_1 | 426. 6275322 | 157. 773 | 22469061. 64 |
| M427T82_1  | 426. 8156044 | 82. 0569 | 42873938. 52 |
| M427T82_2  | 426. 826031  | 82. 0569 | 36453222. 52 |
| M427T754   | 427. 0562218 | 753. 987 | 12829639. 83 |
| M427T136   | 427. 0728502 | 135. 971 | 1750515. 231 |
| M427T331   | 427. 1170537 | 330. 809 | 6056955. 151 |
| M427T158_2 | 427. 1291071 | 157. 773 | 10248517. 7  |
| M427T652   | 427. 1418839 | 651. 956 | 4021575. 27  |
| M427T488   | 427. 1482854 | 488. 437 | 2145233. 443 |
| M427T96    | 427. 1607318 | 95. 7572 | 20867837. 73 |
| M427T662_1 | 427. 1670169 | 661. 979 | 23553136. 55 |
| M427T339_1 | 427. 172187  | 339. 085 | 8652548. 814 |
| M427T309   | 427. 1795691 | 308. 967 | 59487293. 01 |
| M427T290   | 427. 1792886 | 289. 912 | 8274601. 118 |
| M427T320   | 427. 1796959 | 319. 758 | 93454730. 85 |
| M427T327   | 427. 1797581 | 326. 78  | 77060500. 69 |
| M427T406_1 | 427. 1781186 | 406. 289 | 4196497. 519 |
| M427T662_2 | 427. 1785059 | 661. 979 | 13459772. 24 |
| M427T339_2 | 427. 1867844 | 339. 085 | 23348724. 71 |
| M427T706   | 427. 1940819 | 706. 229 | 3720527. 714 |
| M427T406_2 | 427. 1894044 | 406. 289 | 2563180. 536 |
| M427T475   | 427. 208636  | 475. 007 | 1254084. 218 |
| M427T403   | 427. 2046259 | 403. 447 | 8174406. 372 |
| M427T426   | 427. 2051266 | 425. 909 | 5513925. 214 |
| M427T716   | 427. 2528881 | 716. 403 | 3081742. 908 |
| M427T670   | 427. 2632997 | 670. 166 | 44058031. 05 |
| M427T534   | 427. 2990434 | 533. 958 | 13147218. 33 |
| M427T588   | 427. 3011059 | 587. 521 | 7538200. 257 |
| M427T620   | 427. 3387187 | 620. 172 | 11173930. 45 |
| M427T635   | 427. 3387537 | 635. 022 | 2776468. 648 |
| M427T565   | 427. 3557996 | 564. 534 | 10077434. 92 |
| M427T649   | 427. 3821795 | 649. 338 | 128669885. 6 |
| M427T719   | 427. 3822209 | 719. 215 | 11074540. 13 |
| M427T703_1 | 427. 3821866 | 703. 35  | 103465443. 4 |
| M427T813   | 427. 3967396 | 812. 862 | 3792488. 258 |
| M427T703_2 | 427. 392982  | 703. 35  | 16714009. 49 |
| M428T75    | 427. 9489014 | 74. 9588 | 9250598. 515 |
| M428T308_1 | 428. 0479003 | 307. 735 | 915997. 0084 |
| M428T806   | 428. 0770292 | 805. 823 | 8647894. 778 |
| M428T308_2 | 428. 131676  | 307. 735 | 36539393. 52 |
| M428T297   | 428. 1381703 | 296. 739 | 15632836. 45 |
| M428T653   | 428. 1375955 | 653. 147 | 18616174. 86 |
| M428T318   | 428. 1380751 | 318. 497 | 30376450. 39 |

|            |              |          |              |
|------------|--------------|----------|--------------|
| M428T308_3 | 428. 1430375 | 307. 735 | 66393370. 57 |
| M428T332   | 428. 1612647 | 332. 2   | 18942746. 25 |
| M428T299   | 428. 162948  | 299. 493 | 34461242. 96 |
| M428T98    | 428. 1736391 | 97. 7824 | 415788143. 8 |
| M428T90    | 428. 1736972 | 89. 6999 | 91731077. 03 |
| M428T309   | 428. 1867158 | 308. 967 | 9671395. 372 |
| M428T708   | 428. 19245   | 707. 557 | 4279881. 602 |
| M428T320   | 428. 1866662 | 319. 758 | 15785095. 16 |
| M428T327   | 428. 1865361 | 326. 78  | 14683375. 99 |
| M428T472   | 428. 2025543 | 472. 132 | 2087042. 354 |
| M428T405   | 428. 2113847 | 404. 872 | 2239325. 711 |
| M428T462   | 428. 2217557 | 461. 845 | 2621342. 185 |
| M428T670   | 428. 2660449 | 670. 166 | 10061761. 33 |
| M428T554_1 | 428. 3141976 | 553. 936 | 107205409. 9 |
| M428T584   | 428. 3142954 | 584. 417 | 142596737. 3 |
| M428T562   | 428. 3143616 | 561. 955 | 134979246. 5 |
| M428T516   | 428. 3143163 | 516. 214 | 15639875. 82 |
| M428T531_1 | 428. 314405  | 531. 127 | 915906888. 1 |
| M428T570_1 | 428. 3142015 | 570. 01  | 201205974. 3 |
| M428T543   | 428. 3143649 | 542. 766 | 112271587. 8 |
| M428T471   | 428. 3142362 | 470. 602 | 21286336. 87 |
| M428T655   | 428. 3141363 | 654. 542 | 43668570. 95 |
| M428T554_2 | 428. 3247239 | 553. 936 | 32941142. 71 |
| M428T531_2 | 428. 3249083 | 531. 127 | 270959069. 6 |
| M428T570_2 | 428. 324723  | 570. 01  | 62684605. 95 |
| M428T605   | 428. 3499477 | 605. 264 | 88619651. 32 |
| M428T638   | 428. 3500738 | 637. 996 | 124168489. 2 |
| M428T668   | 428. 3480562 | 667. 609 | 34349114. 05 |
| M428T614   | 428. 3501216 | 614. 215 | 55037438. 83 |
| M428T833   | 428. 3711441 | 833. 029 | 1142064. 829 |
| M428T649   | 428. 3848937 | 649. 338 | 12407118. 12 |
| M428T703   | 428. 3832264 | 703. 35  | 10006449. 16 |
| M429T82_1  | 428. 8146344 | 82. 0569 | 12995656     |
| M429T164   | 428. 9750086 | 163. 846 | 70435379. 8  |
| M429T308   | 429. 1437389 | 307. 735 | 12263418. 52 |
| M429T318   | 429. 1438332 | 318. 497 | 4970592. 448 |
| M429T445   | 429. 1628736 | 444. 725 | 2680036. 236 |
| M429T98    | 429. 1811069 | 97. 7824 | 62303787. 07 |
| M429T89    | 429. 1763181 | 88. 6838 | 10980435. 52 |
| M429T309   | 429. 1855806 | 308. 967 | 1771261. 879 |
| M429T626   | 429. 1859387 | 626. 042 | 36114231. 79 |
| M429T320   | 429. 1852629 | 319. 758 | 4309834. 319 |
| M429T458   | 429. 1958352 | 457. 576 | 2127102. 691 |
| M429T358   | 429. 1963934 | 357. 958 | 9356873. 292 |
| M429T605_1 | 429. 2112769 | 605. 264 | 885064. 0964 |
| M429T82_2  | 429. 2367584 | 82. 0569 | 3230901. 796 |
| M429T406   | 429. 265929  | 406. 289 | 61230208. 34 |
| M429T562   | 429. 3166935 | 561. 955 | 40327915. 53 |
| M429T655   | 429. 3163321 | 654. 542 | 11939909. 19 |
| M429T555   | 429. 318572  | 555. 358 | 32641894. 25 |
| M429T584   | 429. 3186674 | 584. 417 | 38656410. 32 |
| M429T531   | 429. 3187435 | 531. 127 | 265098763. 7 |
| M429T570   | 429. 3185266 | 570. 01  | 63091665. 38 |
| M429T543   | 429. 318686  | 542. 766 | 30020978. 62 |

|            |              |          |              |
|------------|--------------|----------|--------------|
| M429T605_2 | 429. 3522781 | 605. 264 | 23787865. 44 |
| M429T638   | 429. 3524576 | 637. 996 | 36575481. 43 |
| M429T614   | 429. 3523957 | 614. 215 | 14610005. 43 |
| M429T838   | 429. 371416  | 837. 524 | 63200571. 69 |
| M430T565_1 | 430. 0393044 | 564. 534 | 7818826. 683 |
| M430T103   | 430. 1529695 | 103. 423 | 14437653. 97 |
| M430T287   | 430. 1555058 | 287. 148 | 8472235. 602 |
| M430T295   | 430. 1552301 | 295. 356 | 11224896. 95 |
| M430T91    | 430. 1528803 | 90. 7088 | 84442611. 03 |
| M430T321   | 430. 1551215 | 321. 198 | 6080003. 321 |
| M430T305_1 | 430. 1551243 | 304. 777 | 27711596. 97 |
| M430T305_2 | 430. 1666734 | 304. 777 | 4527612. 135 |
| M430T708   | 430. 1867887 | 707. 557 | 1386874. 703 |
| M430T288   | 430. 1871147 | 288. 481 | 20026669. 65 |
| M430T427   | 430. 1824848 | 427. 362 | 3692545. 428 |
| M430T626   | 430. 1880139 | 626. 042 | 7762284. 635 |
| M430T335   | 430. 1913791 | 334. 966 | 2988045. 511 |
| M430T188   | 430. 1909844 | 188. 126 | 2270594. 843 |
| M430T324   | 430. 1914618 | 323. 984 | 6249257. 007 |
| M430T368   | 430. 2017645 | 367. 949 | 5448109. 611 |
| M430T348   | 430. 2039564 | 348. 488 | 18013162. 98 |
| M430T406   | 430. 2716243 | 406. 289 | 16047557. 01 |
| M430T565_2 | 430. 320135  | 564. 534 | 2778033860   |
| M430T531   | 430. 3222187 | 531. 127 | 44054969. 21 |
| M430T628_1 | 430. 3201567 | 627. 58  | 328319552. 1 |
| M430T610_1 | 430. 3201428 | 609. 592 | 39903948. 14 |
| M430T543   | 430. 3287567 | 542. 766 | 217169870. 8 |
| M430T579   | 430. 330745  | 578. 816 | 151582864    |
| M430T565_3 | 430. 3307147 | 564. 534 | 7571589226   |
| M430T516   | 430. 3306726 | 516. 214 | 142312253. 5 |
| M430T503   | 430. 3307594 | 503. 046 | 111897580. 7 |
| M430T628_2 | 430. 3307355 | 627. 58  | 920211541. 2 |
| M430T591   | 430. 3306281 | 590. 607 | 55401928. 27 |
| M430T610_2 | 430. 3307195 | 609. 592 | 134785643. 2 |
| M430T631_1 | 430. 3599236 | 630. 507 | 49435862. 5  |
| M430T645   | 430. 3605826 | 645. 278 | 7365940. 264 |
| M430T631_2 | 430. 3726043 | 630. 507 | 40450644. 99 |
| M430T838   | 430. 3750634 | 837. 524 | 20036146. 2  |
| M430T820   | 430. 374868  | 819. 78  | 12006686. 41 |
| M430T809   | 430. 3751879 | 808. 678 | 4320688. 783 |
| M430T164   | 430. 4876332 | 163. 846 | 2583536. 829 |
| M431T565_1 | 430. 6139397 | 564. 534 | 2419043. 646 |
| M431T589   | 431. 1295243 | 589. 053 | 8534831. 384 |
| M431T777   | 431. 136004  | 777. 245 | 7618253. 98  |
| M431T104   | 431. 166055  | 104. 493 | 23157799. 8  |
| M431T427   | 431. 1806316 | 427. 362 | 2236899. 6   |
| M431T445   | 431. 1784356 | 444. 725 | 3515152. 362 |
| M431T287   | 431. 191413  | 287. 148 | 3191930. 836 |
| M431T378   | 431. 1869677 | 377. 704 | 3035680. 56  |
| M431T369   | 431. 199349  | 369. 321 | 3594220. 355 |
| M431T494   | 431. 1979391 | 494. 289 | 1867876. 075 |
| M431T348   | 431. 2071833 | 348. 488 | 5085805. 662 |
| M431T838   | 431. 2019547 | 837. 524 | 66037289. 67 |
| M431T776_1 | 431. 2041271 | 776. 194 | 42244042. 41 |



|            |              |          |              |
|------------|--------------|----------|--------------|
| M431T293   | 431. 2125354 | 292. 623 | 2432297. 147 |
| M431T557   | 431. 2250494 | 556. 816 | 10640046. 11 |
| M431T323   | 431. 2361971 | 322. 536 | 14400396. 83 |
| M431T540   | 431. 2443911 | 539. 764 | 2846391. 539 |
| M431T478   | 431. 244407  | 477. 989 | 11975278. 69 |
| M431T346   | 431. 2448021 | 345. 848 | 4144182. 029 |
| M431T776_2 | 431. 3121618 | 776. 194 | 4836310. 236 |
| M431T817   | 431. 3146338 | 816. 953 | 14690643. 09 |
| M431T565_2 | 431. 3315413 | 564. 534 | 2179770607   |
| M431T628_1 | 431. 3315473 | 627. 58  | 264355662. 9 |
| M431T543   | 431. 3315348 | 542. 766 | 58736796. 74 |
| M431T610   | 431. 3315392 | 609. 592 | 36736345. 68 |
| M431T579   | 431. 3356486 | 578. 816 | 42663778. 94 |
| M431T516   | 431. 3356554 | 516. 214 | 39160181. 47 |
| M431T503   | 431. 3357827 | 503. 046 | 31375622. 15 |
| M431T531   | 431. 3355832 | 531. 127 | 13933270. 63 |
| M431T551   | 431. 3356342 | 550. 919 | 56759036. 95 |
| M431T591   | 431. 3354674 | 590. 607 | 15080546. 99 |
| M431T628_2 | 431. 342234  | 627. 58  | 128702950. 9 |
| M432T381   | 431. 7312106 | 380. 63  | 3889010. 714 |
| M432T633   | 431. 7330514 | 633. 476 | 4077367. 775 |
| M432T598_1 | 432. 0589493 | 598. 125 | 1096125. 421 |
| M432T547   | 432. 0567528 | 546. 651 | 6257085. 021 |
| M432T144   | 432. 1249356 | 143. 959 | 10620686. 45 |
| M432T372_1 | 432. 1449845 | 372. 152 | 4401843. 073 |
| M432T354   | 432. 1449312 | 353. 978 | 5544312. 19  |
| M432T293   | 432. 1481951 | 292. 623 | 13021826. 01 |
| M432T106   | 432. 1481744 | 105. 503 | 13711778. 92 |
| M432T336_1 | 432. 1484023 | 336. 344 | 21761955. 81 |
| M432T305   | 432. 1480168 | 304. 777 | 16162632. 16 |
| M432T327   | 432. 1484027 | 326. 78  | 13637380. 66 |
| M432T372_2 | 432. 1588287 | 372. 152 | 3841759. 734 |
| M432T353   | 432. 1588497 | 352. 65  | 5668097. 351 |
| M432T362   | 432. 1586615 | 362. 146 | 2013659. 992 |
| M432T318   | 432. 1586738 | 318. 497 | 3172322. 026 |
| M432T386   | 432. 1588278 | 386. 352 | 4176289. 137 |
| M432T102   | 432. 1674347 | 102. 247 | 15555179. 33 |
| M432T202   | 432. 1673209 | 202. 149 | 1533530. 865 |
| M432T94    | 432. 1675907 | 93. 7378 | 56914042. 96 |
| M432T427   | 432. 1662572 | 427. 362 | 2929366. 46  |
| M432T188   | 432. 1718103 | 188. 126 | 8731799. 438 |
| M432T276   | 432. 1696592 | 276. 414 | 8104983. 098 |
| M432T288   | 432. 1826609 | 288. 481 | 4323313. 523 |
| M432T475   | 432. 1843972 | 475. 007 | 2018917. 587 |
| M432T233   | 432. 1842017 | 233. 081 | 4152979. 686 |
| M432T336_2 | 432. 1845261 | 336. 344 | 5841483. 567 |
| M432T218   | 432. 1842833 | 217. 866 | 4992031. 85  |
| M432T317   | 432. 1845968 | 317. 199 | 4227550. 359 |
| M432T336_3 | 432. 1972491 | 336. 344 | 115258398. 9 |
| M432T798   | 432. 2122074 | 797. 773 | 57446344. 88 |
| M432T378   | 432. 2419454 | 377. 704 | 3123917. 403 |
| M432T541   | 432. 2522538 | 541. 275 | 6939174. 033 |
| M432T462   | 432. 2757887 | 461. 845 | 6388809. 319 |
| M432T565   | 432. 3331124 | 564. 534 | 380792506. 5 |

|            |              |          |              |
|------------|--------------|----------|--------------|
| M432T628   | 432. 3333694 | 627. 58  | 39009922. 84 |
| M432T662   | 432. 3441618 | 661. 979 | 8903883. 266 |
| M432T579   | 432. 3415075 | 578. 816 | 29453800. 39 |
| M432T641   | 432. 3414148 | 640. 717 | 4200525. 857 |
| M432T598_2 | 432. 3411613 | 598. 125 | 1962315803   |
| M432T487   | 432. 341085  | 486. 885 | 128158218. 8 |
| M432T545_1 | 432. 3411361 | 545. 203 | 5737754160   |
| M432T614_1 | 432. 341241  | 614. 215 | 47393981. 46 |
| M432T561   | 432. 350552  | 560. 942 | 54554114. 64 |
| M432T527   | 432. 3537358 | 526. 676 | 40481674. 16 |
| M432T598_3 | 432. 3541315 | 598. 125 | 789771388. 1 |
| M432T545_2 | 432. 3539247 | 545. 203 | 2827128020   |
| M432T614_2 | 432. 3536894 | 614. 215 | 20341417. 12 |
| M432T631   | 432. 3713635 | 630. 507 | 3173529. 721 |
| M433T598_1 | 432. 6361798 | 598. 125 | 1752875. 549 |
| M433T545_1 | 432. 6446778 | 545. 203 | 3672861. 524 |
| M433T600   | 432. 6471153 | 599. 621 | 875129. 587  |
| M433T772   | 432. 7407356 | 772. 206 | 17148617. 28 |
| M433T187   | 433. 0954314 | 186. 709 | 4648378. 3   |
| M433T202   | 433. 095438  | 202. 149 | 2763800. 8   |
| M433T652   | 433. 0934169 | 651. 956 | 5323170. 213 |
| M433T544   | 433. 1083835 | 544. 056 | 5471946. 78  |
| M433T369   | 433. 1317442 | 369. 321 | 4518157. 25  |
| M433T430   | 433. 1316661 | 430. 131 | 3510023. 553 |
| M433T649   | 433. 1318976 | 649. 338 | 3464296. 922 |
| M433T491   | 433. 1319677 | 491. 373 | 2409339. 102 |
| M433T331   | 433. 1316983 | 330. 809 | 9430036. 849 |
| M433T341   | 433. 1318211 | 340. 548 | 16657672. 84 |
| M433T321_1 | 433. 1318101 | 321. 198 | 8034742. 493 |
| M433T358   | 433. 1318091 | 357. 958 | 10134109. 57 |
| M433T104   | 433. 1317164 | 104. 493 | 15007735. 03 |
| M433T94    | 433. 1721661 | 93. 7378 | 4123563. 098 |
| M433T332   | 433. 1788337 | 332. 2   | 2688728. 701 |
| M433T603   | 433. 1759197 | 602. 513 | 3499600. 926 |
| M433T321_2 | 433. 1788364 | 321. 198 | 2991217. 717 |
| M433T701   | 433. 1886708 | 700. 758 | 27621804. 12 |
| M433T306   | 433. 1895641 | 306. 247 | 8565934. 404 |
| M433T715   | 433. 1885883 | 715. 011 | 5546785. 968 |
| M433T453   | 433. 2087363 | 453. 317 | 1276701. 148 |
| M433T336   | 433. 2039437 | 336. 344 | 12210266. 64 |
| M433T818   | 433. 2145591 | 818. 418 | 9692020. 156 |
| M433T798_1 | 433. 2140858 | 797. 773 | 575854623. 7 |
| M433T798_2 | 433. 2276501 | 797. 773 | 355398653. 1 |
| M433T565   | 433. 3415682 | 564. 534 | 40104653. 75 |
| M433T598_2 | 433. 345656  | 598. 125 | 600471015. 3 |
| M433T545_2 | 433. 3478966 | 545. 203 | 1976288574   |
| M433T527   | 433. 3477958 | 526. 676 | 24189868. 15 |
| M433T614   | 433. 3456454 | 614. 215 | 13741405. 46 |
| M433T598_3 | 433. 3569689 | 598. 125 | 271097937. 8 |
| M434T195   | 434. 1068336 | 195. 23  | 3859077. 091 |
| M434T163   | 434. 1107719 | 162. 728 | 280147652. 2 |
| M434T180   | 434. 110567  | 179. 75  | 125112170. 6 |
| M434T306   | 434. 115039  | 306. 247 | 996897. 4681 |
| M434T118   | 434. 1209299 | 118. 116 | 53050080. 47 |

|            |              |          |              |
|------------|--------------|----------|--------------|
| M434T160   | 434. 1225811 | 160. 369 | 404247786. 1 |
| M434T375   | 434. 1618509 | 375. 021 | 4409299. 563 |
| M434T143   | 434. 1625186 | 142. 85  | 11871895. 1  |
| M434T357   | 434. 1616667 | 356. 74  | 8514953. 816 |
| M434T320   | 434. 1614218 | 319. 758 | 12544090. 58 |
| M434T365   | 434. 1616176 | 365. 061 | 8641406. 079 |
| M434T218   | 434. 1635648 | 217. 866 | 19816691. 54 |
| M434T104   | 434. 1634705 | 104. 493 | 59135258. 1  |
| M434T355   | 434. 1745121 | 355. 41  | 13653782. 66 |
| M434T293   | 434. 1766677 | 292. 623 | 7710739. 38  |
| M434T436   | 434. 1766272 | 436. 069 | 7032236. 929 |
| M434T425   | 434. 1767974 | 424. 572 | 4548618. 151 |
| M434T316   | 434. 1767097 | 315. 701 | 2700273. 355 |
| M434T301   | 434. 1774017 | 300. 782 | 3625324. 045 |
| M434T347   | 434. 174517  | 347. 175 | 19780000. 52 |
| M434T701   | 434. 1847442 | 700. 758 | 8766150. 1   |
| M434T106   | 434. 1764382 | 105. 503 | 5731698. 938 |
| M434T477   | 434. 2044983 | 476. 554 | 27709865. 03 |
| M434T419   | 434. 2002377 | 418. 97  | 1989694. 981 |
| M434T487   | 434. 2036302 | 486. 885 | 3821007. 788 |
| M434T672   | 434. 2108921 | 671. 649 | 3568192. 022 |
| M434T814_1 | 434. 2174071 | 814. 095 | 106870768. 2 |
| M434T798_1 | 434. 2196382 | 797. 773 | 182427547. 3 |
| M434T814_2 | 434. 2292357 | 814. 095 | 8432769. 702 |
| M434T798_2 | 434. 2324951 | 797. 773 | 57660813. 45 |
| M434T598_1 | 434. 3484221 | 598. 125 | 89701186. 85 |
| M434T545   | 434. 3485029 | 545. 203 | 275738231. 4 |
| M434T598_2 | 434. 359151  | 598. 125 | 45716716. 98 |
| M435T164   | 434. 6168731 | 163. 846 | 111539932. 1 |
| M435T158_1 | 434. 616806  | 157. 773 | 107605819. 4 |
| M435T180   | 434. 6191327 | 179. 75  | 48476513. 92 |
| M435T425   | 434. 6791071 | 424. 572 | 1095509. 585 |
| M435T158_2 | 435. 1201112 | 157. 773 | 35251982. 06 |
| M435T426   | 435. 1261717 | 425. 909 | 42259140. 69 |
| M435T567   | 435. 1370013 | 567. 1   | 13651406     |
| M435T106   | 435. 167595  | 105. 503 | 18516106. 75 |
| M435T580   | 435. 1626675 | 580. 22  | 7455465. 753 |
| M435T594   | 435. 1629263 | 593. 62  | 2053267. 792 |
| M435T357   | 435. 1669953 | 356. 74  | 1304826. 954 |
| M435T218   | 435. 1652827 | 217. 866 | 3903240. 998 |
| M435T435   | 435. 1758008 | 434. 589 | 2102374. 628 |
| M435T348   | 435. 1850837 | 348. 488 | 8396190. 203 |
| M435T682   | 435. 1973424 | 681. 885 | 27936750. 7  |
| M435T668   | 435. 2047834 | 667. 609 | 2863157. 363 |
| M435T478   | 435. 1998175 | 477. 989 | 5342812. 234 |
| M435T297   | 435. 2079153 | 296. 739 | 1211667. 954 |
| M435T463   | 435. 234343  | 463. 271 | 6092390. 696 |
| M435T798   | 435. 2309603 | 797. 773 | 20807182. 73 |
| M435T736   | 435. 2361108 | 735. 7   | 1063465. 7   |
| M435T811   | 435. 2489242 | 811. 413 | 100259765. 2 |
| M435T515   | 435. 2575341 | 514. 727 | 3261637. 012 |
| M435T598   | 435. 3524321 | 598. 125 | 11261531. 83 |
| M435T545   | 435. 3546133 | 545. 203 | 32183948. 27 |
| M436T163_1 | 435. 6175205 | 162. 728 | 5452302. 211 |

|            |              |          |              |
|------------|--------------|----------|--------------|
| M436T158_1 | 435. 6238731 | 157. 773 | 6577348. 286 |
| M436T487_1 | 435. 7166298 | 486. 885 | 2383379. 355 |
| M436T463   | 435. 7380005 | 463. 271 | 2651802. 092 |
| M436T164_1 | 435. 9794652 | 163. 846 | 6349609. 592 |
| M436T158_2 | 436. 1116034 | 157. 773 | 9261090. 821 |
| M436T426   | 436. 130716  | 425. 909 | 9338497. 676 |
| M436T777   | 436. 1373922 | 777. 245 | 5014301. 395 |
| M436T163_2 | 436. 1438899 | 162. 728 | 59127835. 66 |
| M436T147   | 436. 1439595 | 146. 742 | 61247790. 93 |
| M436T180   | 436. 1440502 | 179. 75  | 52786220. 3  |
| M436T310   | 436. 1437718 | 310. 075 | 33938293. 84 |
| M436T171   | 436. 1439476 | 170. 665 | 54248395. 76 |
| M436T201   | 436. 1438917 | 200. 766 | 49921709. 91 |
| M436T188   | 436. 1438674 | 188. 126 | 68988924. 8  |
| M436T107   | 436. 1437754 | 106. 513 | 40061987. 63 |
| M436T311_1 | 436. 1837648 | 311. 445 | 5660179. 515 |
| M436T164_2 | 436. 1915552 | 163. 846 | 132703391    |
| M436T190   | 436. 1914588 | 189. 571 | 38588491. 39 |
| M436T293   | 436. 1919853 | 292. 623 | 14614635. 56 |
| M436T106   | 436. 1914486 | 105. 503 | 509244034    |
| M436T260   | 436. 1915581 | 259. 74  | 8341709. 668 |
| M436T143   | 436. 1915107 | 142. 85  | 168405619. 3 |
| M436T121   | 436. 1915005 | 120. 525 | 103946209. 5 |
| M436T279   | 436. 1914987 | 279. 039 | 10143174. 1  |
| M436T198   | 436. 1915502 | 198. 072 | 21967637. 38 |
| M436T237   | 436. 1916342 | 237. 171 | 15170052. 54 |
| M436T219   | 436. 1917899 | 219. 233 | 41775648. 31 |
| M436T311_2 | 436. 1954707 | 311. 445 | 6725675. 974 |
| M436T682   | 436. 2023998 | 681. 885 | 6573458. 158 |
| M436T406   | 436. 2171188 | 406. 289 | 6297372. 485 |
| M436T487_2 | 436. 2251581 | 486. 885 | 1337576. 466 |
| M436T785   | 436. 2281034 | 785. 136 | 23396108. 89 |
| M436T748   | 436. 2280878 | 748. 486 | 11361390. 42 |
| M436T323   | 436. 2281981 | 322. 536 | 3635990. 187 |
| M436T613   | 436. 2302474 | 612. 699 | 11572162. 97 |
| M436T730   | 436. 2301786 | 729. 798 | 23201872. 14 |
| M436T737   | 436. 3039891 | 737. 198 | 3210190. 067 |
| M436T61    | 436. 3449328 | 61. 1538 | 15974645. 6  |
| M436T135   | 436. 340424  | 134. 574 | 8499517. 667 |
| M437T525   | 436. 8962722 | 525. 132 | 1327935. 756 |
| M437T164   | 436. 9866282 | 163. 846 | 4720295. 661 |
| M437T279   | 437. 1240451 | 279. 039 | 9862666. 619 |
| M437T194   | 437. 1255981 | 193. 823 | 1319700. 587 |
| M437T190   | 437. 1455795 | 189. 571 | 10931205. 61 |
| M437T180   | 437. 1455248 | 179. 75  | 8452011. 736 |
| M437T167   | 437. 1457285 | 166. 613 | 18291045. 22 |
| M437T301   | 437. 1413295 | 300. 782 | 4244239. 648 |
| M437T147   | 437. 1488925 | 146. 742 | 9641436. 582 |
| M437T310   | 437. 1494754 | 310. 075 | 5098728. 665 |
| M437T106   | 437. 1903232 | 105. 503 | 82728210. 65 |
| M437T143   | 437. 1904931 | 142. 85  | 27042498. 35 |
| M437T158   | 437. 1979437 | 157. 773 | 13698883. 22 |
| M437T617   | 437. 2126942 | 617. 133 | 1361281. 738 |
| M437T663   | 437. 2258065 | 663. 287 | 8143897. 274 |

|            |              |          |              |
|------------|--------------|----------|--------------|
| M437T462   | 437. 2339186 | 461. 845 | 4659432. 414 |
| M437T545   | 437. 2388037 | 545. 203 | 9117208. 456 |
| M437T595   | 437. 3015026 | 595. 066 | 3758711. 676 |
| M437T474   | 437. 3383452 | 473. 597 | 7451665. 213 |
| M437T485   | 437. 3385149 | 485. 471 | 37851271. 58 |
| M437T570   | 437. 3371493 | 570. 01  | 7720678. 753 |
| M437T502   | 437. 338346  | 501. 549 | 8597875. 391 |
| M438T164_1 | 437. 9679831 | 163. 846 | 160769592. 1 |
| M438T164_2 | 437. 978847  | 163. 846 | 65390681. 05 |
| M438T302_1 | 438. 113682  | 302. 191 | 97938536. 69 |
| M438T302_2 | 438. 1267401 | 302. 191 | 13350778. 03 |
| M438T777   | 438. 1451451 | 777. 245 | 6195141. 175 |
| M438T102   | 438. 1659017 | 102. 247 | 36540225. 54 |
| M438T411   | 438. 1773982 | 410. 542 | 440209. 0782 |
| M438T223   | 438. 1962592 | 223. 474 | 1230391. 605 |
| M438T246   | 438. 1941807 | 246. 372 | 2700838. 851 |
| M438T143   | 438. 1940927 | 142. 85  | 6245343. 851 |
| M438T104   | 438. 1941897 | 104. 493 | 24241298. 25 |
| M438T311   | 438. 2050022 | 311. 445 | 3882670. 854 |
| M438T491   | 438. 2264313 | 491. 373 | 19628975     |
| M438T493   | 438. 2375736 | 492. 895 | 86160849. 58 |
| M438T582   | 438. 2486197 | 581. 625 | 5969808. 206 |
| M438T570   | 438. 3420448 | 570. 01  | 2110857. 224 |
| M439T406   | 438. 8818805 | 406. 289 | 2186210. 837 |
| M439T164   | 438. 9764653 | 163. 846 | 124445658. 9 |
| M439T102   | 439. 1742934 | 102. 247 | 5969493. 849 |
| M439T588   | 439. 2288847 | 587. 521 | 8824955. 968 |
| M439T493   | 439. 2401158 | 492. 895 | 22709205. 16 |
| M439T582   | 439. 2485832 | 581. 625 | 1245674. 545 |
| M439T600   | 439. 3185337 | 599. 621 | 5398042. 817 |
| M439T622   | 439. 3534243 | 621. 708 | 55729075. 59 |
| M439T669   | 439. 3533494 | 668. 867 | 144194902. 4 |
| M439T638   | 439. 3534489 | 637. 996 | 24324816. 93 |
| M439T711   | 439. 3533571 | 710. 534 | 34046039. 83 |
| M439T580   | 439. 3532466 | 580. 22  | 63968192. 48 |
| M439T771   | 439. 3533472 | 771. 042 | 21493655. 9  |
| M439T762   | 439. 3534473 | 762. 439 | 21711124. 79 |
| M439T504   | 439. 3598747 | 504. 466 | 7402127. 416 |
| M439T545   | 439. 3534618 | 545. 203 | 46836433. 6  |
| M439T463   | 439. 3533321 | 463. 271 | 39912854. 8  |
| M439T610   | 439. 3534044 | 609. 592 | 29700454. 16 |
| M439T694   | 439. 3535097 | 693. 81  | 52611243. 72 |
| M439T589   | 439. 3532663 | 589. 053 | 34518514. 63 |
| M440T622_1 | 439. 727082  | 621. 708 | 11246821. 96 |
| M440T580_1 | 439. 7351943 | 580. 22  | 5446186. 371 |
| M440T164   | 439. 986474  | 163. 846 | 11927822. 53 |
| M440T163   | 440. 096709  | 162. 728 | 5922473. 059 |
| M440T102   | 440. 1382446 | 102. 247 | 5054241. 515 |
| M440T143_1 | 440. 1383199 | 142. 85  | 3054675. 884 |
| M440T777   | 440. 1342048 | 777. 245 | 2499612. 305 |
| M440T127   | 440. 1697186 | 126. 785 | 22390743. 95 |
| M440T143_2 | 440. 1732901 | 142. 85  | 34661320. 09 |
| M440T104   | 440. 1731767 | 104. 493 | 181767267. 3 |
| M440T341   | 440. 1996889 | 340. 548 | 1480191. 55  |

|            |              |          |              |
|------------|--------------|----------|--------------|
| M440T623   | 440. 2302641 | 623. 11  | 6173301. 762 |
| M440T580_2 | 440. 2324455 | 580. 22  | 4815632. 666 |
| M440T579   | 440. 2454249 | 578. 816 | 13852386. 75 |
| M440T494   | 440. 2481186 | 494. 289 | 6338971. 181 |
| M440T541   | 440. 3134666 | 541. 275 | 30414196. 47 |
| M440T557   | 440. 3575341 | 556. 816 | 11765864. 52 |
| M440T475   | 440. 3572911 | 475. 007 | 2868409. 876 |
| M440T452   | 440. 3570178 | 451. 804 | 3063012. 943 |
| M440T580_3 | 440. 3571637 | 580. 22  | 19799157. 73 |
| M440T545   | 440. 3576141 | 545. 203 | 13472602. 78 |
| M440T463   | 440. 3572249 | 463. 271 | 12658598. 69 |
| M440T622_2 | 440. 3596428 | 621. 708 | 18334554. 2  |
| M440T669   | 440. 3595618 | 668. 867 | 46559238. 95 |
| M440T610   | 440. 3596234 | 609. 592 | 9810852. 229 |
| M440T694   | 440. 3595944 | 693. 81  | 17430346. 11 |
| M440T771   | 440. 3657087 | 771. 042 | 1566380. 505 |
| M440T32_1  | 440. 3967486 | 32. 4171 | 4630280. 99  |
| M440T32_2  | 440. 4098761 | 32. 4171 | 48098978. 71 |
| M441T449_1 | 440. 7169698 | 448. 978 | 3204015. 528 |
| M441T772   | 440. 7253593 | 772. 206 | 5731330. 443 |
| M441T565_1 | 440. 734409  | 564. 534 | 150698464. 2 |
| M441T580   | 440. 7344065 | 580. 22  | 9688989. 254 |
| M441T164   | 440. 9773109 | 163. 846 | 16411347. 07 |
| M441T121   | 441. 0196272 | 120. 525 | 6178097. 229 |
| M441T92    | 441. 0944552 | 91. 7174 | 84991750. 06 |
| M441T160   | 441. 1096787 | 160. 369 | 6422278. 215 |
| M441T297   | 441. 1206881 | 296. 739 | 5692659. 726 |
| M441T104   | 441. 1777649 | 104. 493 | 23532664. 55 |
| M441T750   | 441. 1844644 | 749. 96  | 14013098. 71 |
| M441T374_1 | 441. 183596  | 373. 532 | 6155198. 437 |
| M441T354   | 441. 1850068 | 353. 978 | 11372597. 6  |
| M441T389   | 441. 1962414 | 389. 035 | 4940049. 008 |
| M441T364   | 441. 1962275 | 363. 58  | 14190382. 15 |
| M441T351   | 441. 1971446 | 351. 348 | 1580683. 813 |
| M441T374_2 | 441. 1956874 | 373. 532 | 80281116. 46 |
| M441T521   | 441. 2106436 | 520. 739 | 15619829. 04 |
| M441T462   | 441. 2215725 | 461. 845 | 6825568. 777 |
| M441T449_2 | 441. 2216295 | 448. 978 | 3709469. 005 |
| M441T490   | 441. 2251428 | 489. 826 | 4486026. 227 |
| M441T779   | 441. 2348967 | 778. 543 | 13586944. 94 |
| M441T425   | 441. 2305364 | 424. 572 | 12009533. 93 |
| M441T565_2 | 441. 2371213 | 564. 534 | 77830845. 11 |
| M441T591   | 441. 2413546 | 590. 607 | 16045534. 52 |
| M441T605   | 441. 2457867 | 605. 264 | 5623154. 857 |
| M441T579   | 441. 2525591 | 578. 816 | 3964910. 71  |
| M441T510   | 441. 2527802 | 510. 333 | 6656090. 78  |
| M441T744   | 441. 2639283 | 744. 182 | 8705420. 959 |
| M441T449_3 | 441. 3392948 | 448. 978 | 2330140. 564 |
| M441T597   | 441. 3339563 | 596. 628 | 2620936. 635 |
| M441T639   | 441. 3665151 | 639. 219 | 36686063. 33 |
| M441T694_1 | 441. 362919  | 693. 81  | 1200090564   |
| M441T633   | 441. 3712387 | 633. 476 | 39589904. 52 |
| M441T829   | 441. 3713109 | 828. 73  | 31268548. 92 |
| M441T809   | 441. 3712919 | 808. 678 | 20128249. 75 |

|            |              |          |              |
|------------|--------------|----------|--------------|
| M441T787   | 441. 3713496 | 786. 569 | 63011810. 02 |
| M441T780   | 441. 3715356 | 780. 043 | 37834942. 12 |
| M441T669   | 441. 375771  | 668. 867 | 435477865. 8 |
| M441T682   | 441. 3757452 | 681. 885 | 377093698    |
| M441T702   | 441. 3756811 | 702. 055 | 322638061. 9 |
| M441T524   | 441. 3712738 | 523. 735 | 65479294. 13 |
| M441T503   | 441. 371531  | 503. 046 | 13571862. 93 |
| M441T562   | 441. 371369  | 561. 955 | 6956971395   |
| M441T765   | 441. 3716375 | 765. 406 | 56607384. 89 |
| M441T718   | 441. 3755986 | 717. 959 | 165507336    |
| M441T515   | 441. 3712091 | 514. 727 | 40326497. 22 |
| M441T607   | 441. 371287  | 606. 774 | 148522076. 5 |
| M441T545   | 441. 3714288 | 545. 203 | 2674242647   |
| M441T652   | 441. 3755863 | 651. 956 | 91201770. 66 |
| M441T741   | 441. 3713339 | 741. 302 | 151532217. 7 |
| M441T576   | 441. 3711711 | 575. 878 | 504994594. 5 |
| M441T588   | 441. 3712516 | 587. 521 | 270380955. 4 |
| M441T694_2 | 441. 3758306 | 693. 81  | 335718606    |
| M441T32    | 441. 4064328 | 32. 4171 | 8762540. 904 |
| M442T160   | 441. 6024038 | 160. 369 | 7353356. 271 |
| M442T565   | 441. 7410127 | 564. 534 | 29582131. 76 |
| M442T524_1 | 441. 8552629 | 523. 735 | 3272495. 236 |
| M442T158_1 | 442. 0987738 | 157. 773 | 115582752    |
| M442T232   | 442. 1020935 | 231. 773 | 2395610. 126 |
| M442T92    | 442. 1004638 | 91. 7174 | 9967860. 472 |
| M442T158_2 | 442. 1104614 | 157. 773 | 58917092. 63 |
| M442T180   | 442. 1441533 | 179. 75  | 22723825. 65 |
| M442T382   | 442. 1792391 | 382. 125 | 836507. 1942 |
| M442T163   | 442. 1904227 | 162. 728 | 87084766     |
| M442T143   | 442. 1904289 | 142. 85  | 54020012. 41 |
| M442T121   | 442. 190338  | 120. 525 | 57376476. 76 |
| M442T109   | 442. 1902415 | 108. 698 | 247192134. 1 |
| M442T358   | 442. 1907055 | 357. 958 | 6644331. 933 |
| M442T374   | 442. 1996342 | 373. 532 | 15846665. 51 |
| M442T792   | 442. 2120208 | 792. 146 | 8800342. 136 |
| M442T459   | 442. 2258239 | 458. 985 | 5203253. 31  |
| M442T469_1 | 442. 2276479 | 469. 252 | 6933821. 073 |
| M442T521   | 442. 2580671 | 520. 739 | 7492026. 737 |
| M442T458   | 442. 2694429 | 457. 576 | 13835350. 65 |
| M442T743   | 442. 28767   | 742. 68  | 1741462. 91  |
| M442T469_2 | 442. 2916652 | 469. 252 | 22590049. 35 |
| M442T549   | 442. 289632  | 549. 375 | 4965773. 572 |
| M442T525   | 442. 291671  | 525. 132 | 16996700. 39 |
| M442T605   | 442. 3268556 | 605. 264 | 6996902. 901 |
| M442T623   | 442. 3270281 | 623. 11  | 22724286. 81 |
| M442T527   | 442. 3288836 | 526. 676 | 13499685. 74 |
| M442T573   | 442. 3266543 | 573. 072 | 22537817. 08 |
| M442T541   | 442. 3336734 | 541. 275 | 4955480. 588 |
| M442T767   | 442. 3734833 | 766. 742 | 20241036. 44 |
| M442T787   | 442. 3733518 | 786. 569 | 20752424. 32 |
| M442T780   | 442. 3733547 | 780. 043 | 12328529. 97 |
| M442T669   | 442. 3733665 | 668. 867 | 182504135. 5 |
| M442T682   | 442. 3733369 | 681. 885 | 153930675    |
| M442T524_2 | 442. 3733193 | 523. 735 | 20074096. 93 |

|            |              |          |              |
|------------|--------------|----------|--------------|
| M442T702   | 442. 3732534 | 702. 055 | 131253319. 4 |
| M442T562   | 442. 3733721 | 561. 955 | 2228298504   |
| M442T728   | 442. 3733282 | 728. 25  | 22631623. 08 |
| M442T718   | 442. 373181  | 717. 959 | 68745792. 37 |
| M442T515   | 442. 373265  | 514. 727 | 11971534. 31 |
| M442T607   | 442. 3732943 | 606. 774 | 45551522. 59 |
| M442T545   | 442. 3734156 | 545. 203 | 864101324. 2 |
| M442T652   | 442. 3731558 | 651. 956 | 35804352. 84 |
| M442T694   | 442. 3733904 | 693. 81  | 139816377. 2 |
| M442T741   | 442. 3733435 | 741. 302 | 43270684. 26 |
| M442T576   | 442. 373197  | 575. 878 | 156837748    |
| M442T588   | 442. 3732231 | 587. 521 | 87332726. 46 |
| M443T164   | 442. 6028572 | 163. 846 | 27468218. 51 |
| M443T158   | 442. 6028401 | 157. 773 | 40141985. 1  |
| M443T82_1  | 442. 7884203 | 82. 0569 | 72216757. 17 |
| M443T82_2  | 442. 7994647 | 82. 0569 | 79755362. 94 |
| M443T665   | 443. 0803745 | 664. 745 | 2155983. 706 |
| M443T160   | 443. 1022737 | 160. 369 | 31400788. 63 |
| M443T117   | 443. 1199034 | 116. 689 | 35116057. 08 |
| M443T136   | 443. 1199048 | 135. 971 | 4743368. 758 |
| M443T388   | 443. 1622362 | 387. 763 | 3591990. 974 |
| M443T346   | 443. 1638506 | 345. 848 | 1352584. 65  |
| M443T218   | 443. 1642014 | 217. 866 | 1692817. 471 |
| M443T163   | 443. 1926213 | 162. 728 | 17595608. 78 |
| M443T109   | 443. 1907107 | 108. 698 | 41714853. 39 |
| M443T372   | 443. 1995218 | 372. 152 | 2302368. 998 |
| M443T358   | 443. 1995427 | 357. 958 | 3580039. 273 |
| M443T316   | 443. 2123621 | 315. 701 | 906293. 3377 |
| M443T477   | 443. 2480927 | 476. 554 | 9895680. 045 |
| M443T469   | 443. 2967577 | 469. 252 | 6961806. 92  |
| M443T525   | 443. 2968908 | 525. 132 | 2821595. 684 |
| M443T573   | 443. 3322443 | 573. 072 | 6476551. 621 |
| M443T623   | 443. 3382665 | 623. 11  | 3597491. 801 |
| M443T649_1 | 443. 3765568 | 649. 338 | 213402366. 3 |
| M443T682   | 443. 3773155 | 681. 885 | 21847300. 77 |
| M443T562   | 443. 3764795 | 561. 955 | 370628602. 6 |
| M443T692   | 443. 3772222 | 692. 461 | 22300908. 63 |
| M443T607   | 443. 376237  | 606. 774 | 5234064. 884 |
| M443T703_1 | 443. 3766824 | 703. 35  | 224252088. 2 |
| M443T545   | 443. 3765263 | 545. 203 | 148919193. 7 |
| M443T632_1 | 443. 376654  | 631. 982 | 19515646. 92 |
| M443T576   | 443. 3760344 | 575. 878 | 22971485. 47 |
| M443T670   | 443. 3819127 | 670. 166 | 36442972. 24 |
| M443T719   | 443. 3873269 | 719. 215 | 60984169. 21 |
| M443T802   | 443. 383055  | 801. 685 | 19235127. 69 |
| M443T791   | 443. 3877467 | 790. 802 | 23211479. 46 |
| M443T746   | 443. 3880269 | 745. 603 | 6518751. 41  |
| M443T649_2 | 443. 3876228 | 649. 338 | 558940448. 6 |
| M443T620   | 443. 3876937 | 620. 172 | 21097543. 21 |
| M443T685   | 443. 3914304 | 684. 985 | 12877243. 61 |
| M443T736   | 443. 3877074 | 735. 7   | 27070181. 09 |
| M443T703_2 | 443. 387745  | 703. 35  | 585948122. 6 |
| M443T632_2 | 443. 3877154 | 631. 982 | 51522531. 22 |
| M443T772   | 443. 3878013 | 772. 206 | 17991355. 11 |



|            |              |          |              |
|------------|--------------|----------|--------------|
| M444T164   | 443. 6046639 | 163. 846 | 2465841. 234 |
| M444T156   | 443. 6047799 | 156. 393 | 4980638. 219 |
| M444T117   | 443. 6220521 | 116. 689 | 12435322. 47 |
| M444T82    | 443. 7951947 | 82. 0569 | 5603784. 762 |
| M444T81    | 443. 8084528 | 80. 824  | 1665386. 434 |
| M444T95    | 444. 1700949 | 94. 7467 | 102964398    |
| M444T500   | 444. 2411531 | 500. 045 | 34269438. 18 |
| M444T703_1 | 444. 2454348 | 703. 35  | 14099972. 45 |
| M444T453   | 444. 3077103 | 453. 317 | 54834796. 64 |
| M444T506_1 | 444. 3078318 | 505. 855 | 481728507. 9 |
| M444T619   | 444. 3054489 | 618. 683 | 56955389. 1  |
| M444T443   | 444. 3079747 | 443. 256 | 13636259     |
| M444T484   | 444. 3078289 | 483. 973 | 299392436. 5 |
| M444T506_2 | 444. 3199791 | 505. 855 | 154718745. 7 |
| M444T525   | 444. 3189502 | 525. 132 | 17674739. 62 |
| M444T644   | 444. 3367481 | 643. 727 | 4193098. 487 |
| M444T633   | 444. 3371074 | 633. 476 | 5546005. 482 |
| M444T515_1 | 444. 3409179 | 514. 727 | 120502018. 3 |
| M444T592   | 444. 345313  | 592. 067 | 101221631. 9 |
| M444T610   | 444. 3454809 | 609. 592 | 79061635. 53 |
| M444T515_2 | 444. 3520131 | 514. 727 | 95502591. 42 |
| M444T562   | 444. 3785574 | 561. 955 | 39794059. 03 |
| M444T649   | 444. 3898316 | 649. 338 | 188113937    |
| M444T620   | 444. 3894588 | 620. 172 | 6349712. 726 |
| M444T719   | 444. 3902008 | 719. 215 | 21266942. 25 |
| M444T703_2 | 444. 3898313 | 703. 35  | 191076940. 1 |
| M444T674   | 444. 3898495 | 674. 402 | 5660000. 713 |
| M444T632   | 444. 3898701 | 631. 982 | 15277663. 4  |
| M444T734   | 444. 3900427 | 734. 269 | 9932376. 544 |
| M444T802   | 444. 3856598 | 801. 685 | 4326677. 176 |
| M444T791   | 444. 3947692 | 790. 802 | 4996646. 833 |
| M445T703_1 | 444. 7478668 | 703. 35  | 6441729. 535 |
| M445T82    | 444. 7964461 | 82. 0569 | 33706262. 14 |
| M445T113   | 444. 9970804 | 112. 781 | 4222069. 329 |
| M445T124   | 444. 9969272 | 124. 487 | 5883431. 955 |
| M445T719   | 445. 0454165 | 719. 215 | 2593990. 244 |
| M445T626   | 445. 1570454 | 626. 042 | 4170209. 376 |
| M445T484_1 | 445. 1627501 | 483. 973 | 907355. 5547 |
| M445T97    | 445. 1725925 | 96. 7698 | 17407337. 27 |
| M445T306   | 445. 1907185 | 306. 247 | 21994152. 33 |
| M445T335   | 445. 1906747 | 334. 966 | 103863660. 8 |
| M445T287   | 445. 1909229 | 287. 148 | 12409770. 13 |
| M445T169   | 445. 1881444 | 169. 221 | 10257237. 82 |
| M445T324   | 445. 1906788 | 323. 984 | 65977088. 48 |
| M445T579   | 445. 2016514 | 578. 816 | 13400125. 29 |
| M445T506   | 445. 3110428 | 505. 855 | 141501957    |
| M445T484_2 | 445. 3109938 | 483. 973 | 84094262. 87 |
| M445T592   | 445. 3507886 | 592. 067 | 27975285. 38 |
| M445T610   | 445. 3489361 | 609. 592 | 22643919. 04 |
| M445T533   | 445. 3555954 | 532. 526 | 997205. 444  |
| M445T515   | 445. 3530933 | 514. 727 | 41602517. 94 |
| M445T649   | 445. 3910974 | 649. 338 | 26254025. 72 |
| M445T703_2 | 445. 3978676 | 703. 35  | 23187866. 84 |
| M446T207   | 446. 1476082 | 207. 393 | 4550132. 57  |

|            |              |          |              |
|------------|--------------|----------|--------------|
| M446T245   | 446. 1473254 | 245. 199 | 9588250. 157 |
| M446T659   | 446. 1474466 | 658. 953 | 89089264. 87 |
| M446T308   | 446. 1539619 | 307. 735 | 6499329. 336 |
| M446T164_1 | 446. 1672986 | 163. 846 | 24640168. 69 |
| M446T359   | 446. 1652187 | 359. 32  | 2668078. 028 |
| M446T347   | 446. 176947  | 347. 175 | 47722154. 9  |
| M446T107   | 446. 1742499 | 106. 513 | 39908165. 67 |
| M446T324   | 446. 17105   | 323. 984 | 6894987. 433 |
| M446T92    | 446. 1804001 | 91. 7174 | 50625873. 59 |
| M446T97    | 446. 1803746 | 96. 7698 | 27892814. 1  |
| M446T164_2 | 446. 179788  | 163. 846 | 62051681. 88 |
| M446T306   | 446. 1989079 | 306. 247 | 1864455. 682 |
| M446T334   | 446. 1989942 | 333. 715 | 24648080. 57 |
| M446T580   | 446. 2029534 | 580. 22  | 2482535. 639 |
| M446T605   | 446. 241696  | 605. 264 | 9270711. 988 |
| M446T838   | 446. 2485974 | 837. 524 | 4091885. 16  |
| M446T780   | 446. 2997208 | 780. 043 | 4748760. 767 |
| M446T462   | 446. 3241008 | 461. 845 | 20419572. 36 |
| M446T499   | 446. 3244776 | 498. 645 | 26926734. 61 |
| M446T510   | 446. 3244448 | 510. 333 | 64597438. 71 |
| M446T485   | 446. 3238783 | 485. 471 | 16398498. 66 |
| M446T548   | 446. 3241533 | 548. 114 | 35154113. 17 |
| M446T528   | 446. 3241523 | 528. 185 | 52463166     |
| M446T433   | 446. 3243809 | 433. 111 | 9066082. 788 |
| M446T610   | 446. 3483018 | 609. 592 | 1468835. 004 |
| M446T625   | 446. 3601188 | 624. 608 | 10607564. 52 |
| M446T562   | 446. 3754684 | 561. 955 | 35868433. 45 |
| M446T545   | 446. 3751879 | 545. 203 | 14785315. 62 |
| M447T605   | 446. 7447511 | 605. 264 | 5386013. 61  |
| M447T121   | 446. 9862822 | 120. 525 | 10078793. 95 |
| M447T358   | 447. 1499241 | 357. 958 | 4772483. 048 |
| M447T582   | 447. 1699034 | 581. 625 | 478137. 4467 |
| M447T346   | 447. 1796268 | 345. 848 | 7452166. 501 |
| M447T469   | 447. 1862833 | 469. 252 | 6978341. 709 |
| M447T478   | 447. 1868074 | 477. 989 | 4293150. 745 |
| M447T92    | 447. 1859805 | 91. 7174 | 5180309. 478 |
| M447T335   | 447. 1952427 | 334. 966 | 2622696. 634 |
| M447T760   | 447. 1976457 | 759. 605 | 5215244. 023 |
| M447T317   | 447. 2061937 | 317. 199 | 4519066. 792 |
| M447T298   | 447. 2309564 | 298. 135 | 6718091. 842 |
| M447T525   | 447. 2558562 | 525. 132 | 1839628. 196 |
| M447T509   | 447. 3277923 | 508. 883 | 20817584. 49 |
| M447T528   | 447. 3275065 | 528. 185 | 15050184. 29 |
| M447T813   | 447. 3812433 | 812. 862 | 3603631. 056 |
| M447T824   | 447. 3813044 | 824. 311 | 6758051. 588 |
| M447T834   | 447. 3811732 | 834. 486 | 9747852. 772 |
| M447T830   | 447. 3946393 | 830. 193 | 7219758. 723 |
| M447T807   | 447. 3948195 | 807. 232 | 3863770. 333 |
| M448T502   | 447. 7361245 | 501. 549 | 3246112. 782 |
| M448T323   | 448. 1098722 | 322. 536 | 3976863. 614 |
| M448T218   | 448. 1383441 | 217. 866 | 21853175. 13 |
| M448T659   | 448. 1501545 | 658. 953 | 2436242. 96  |
| M448T160   | 448. 1787954 | 160. 369 | 22428465. 13 |
| M448T201   | 448. 1785652 | 200. 766 | 20501831. 3  |

|            |             |         |             |
|------------|-------------|---------|-------------|
| M448T389   | 448.196228  | 389.035 | 8487556.576 |
| M448T443   | 448.1967474 | 443.256 | 3724905.65  |
| M448T439   | 448.2187348 | 439.021 | 3819704.966 |
| M448T493_1 | 448.2216414 | 492.895 | 4611350.917 |
| M448T368   | 448.2282837 | 367.949 | 3599257.558 |
| M448T298   | 448.2342526 | 298.135 | 878325.8708 |
| M448T500   | 448.246303  | 500.045 | 2056445.875 |
| M448T442   | 448.3367507 | 442.005 | 12931563.84 |
| M448T477   | 448.3386321 | 476.554 | 9325481.546 |
| M448T493_2 | 448.338639  | 492.895 | 15465205.85 |
| M448T566   | 448.3387244 | 565.79  | 10429601.52 |
| M448T534   | 448.3411517 | 533.958 | 13160884.8  |
| M448T509   | 448.341578  | 508.883 | 15377923.18 |
| M448T484   | 448.3388323 | 483.973 | 18557803.39 |
| M448T838   | 448.3856475 | 837.524 | 2127278.984 |
| M449T462_1 | 448.7326528 | 461.845 | 15729068.48 |
| M449T163   | 449.1002816 | 162.728 | 2997998.658 |
| M449T294   | 449.1296783 | 293.896 | 17869905.38 |
| M449T302   | 449.1296703 | 302.191 | 15766499.07 |
| M449T218   | 449.1431718 | 217.866 | 4545108.078 |
| M449T309   | 449.1721858 | 308.967 | 6237498.87  |
| M449T250   | 449.1745292 | 250.144 | 3861467.79  |
| M449T295   | 449.1745718 | 295.356 | 2549779.577 |
| M449T185   | 449.1817716 | 185.398 | 10088794.04 |
| M449T502_1 | 449.1928447 | 501.549 | 25444773.37 |
| M449T502_2 | 449.2050495 | 501.549 | 14361823.64 |
| M449T462_2 | 449.2357444 | 461.845 | 12828412.94 |
| M449T419   | 449.2379311 | 418.97  | 18823530.73 |
| M449T507   | 449.2448404 | 507.343 | 10934410.98 |
| M449T453   | 449.2497271 | 453.317 | 3508011.291 |
| M449T462_3 | 449.2484577 | 461.845 | 3412203.302 |
| M449T703   | 449.3937973 | 703.35  | 2860434.274 |
| M450T419   | 449.7395656 | 418.97  | 8792351.732 |
| M450T516   | 449.8846579 | 516.214 | 5300482.525 |
| M450T161   | 450.1559325 | 161.494 | 19317104.8  |
| M450T144   | 450.155771  | 143.959 | 19024085.78 |
| M450T294   | 450.1580835 | 293.896 | 8772091.445 |
| M450T106   | 450.1556669 | 105.503 | 47002523.96 |
| M450T375_1 | 450.1674162 | 375.021 | 13757149.32 |
| M450T180   | 450.16223   | 179.75  | 8300135.194 |
| M450T402   | 450.1674906 | 401.963 | 15757439.59 |
| M450T386_1 | 450.16711   | 386.352 | 16773403.78 |
| M450T375_2 | 450.1795495 | 375.021 | 16856503.26 |
| M450T401   | 450.179615  | 400.59  | 25148469.63 |
| M450T386_2 | 450.1783645 | 386.352 | 26641529.31 |
| M450T416   | 450.192117  | 416.239 | 3174286.832 |
| M450T426   | 450.1916747 | 425.909 | 2277781.089 |
| M450T701_1 | 450.2016371 | 700.758 | 49931233.54 |
| M450T503   | 450.1985828 | 503.046 | 5885425.197 |
| M450T297   | 450.2052831 | 296.739 | 2721918.08  |
| M450T701_2 | 450.2147991 | 700.758 | 123129641.8 |
| M450T798_1 | 450.2397461 | 797.773 | 586276943.6 |
| M450T662   | 450.2441636 | 661.979 | 20875133.66 |
| M450T818   | 450.2510992 | 818.418 | 18424217.6  |

|            |              |          |              |
|------------|--------------|----------|--------------|
| M450T798_2 | 450. 2510712 | 797. 773 | 924943725. 6 |
| M451T113   | 451. 0039672 | 112. 781 | 2889585. 261 |
| M451T659_1 | 451. 092618  | 658. 953 | 6969488. 112 |
| M451T659_2 | 451. 1039284 | 658. 953 | 55102897. 28 |
| M451T382   | 451. 1315305 | 382. 125 | 2044144. 406 |
| M451T649   | 451. 1424775 | 649. 338 | 22477793. 89 |
| M451T96    | 451. 145303  | 95. 7572 | 25523207. 08 |
| M451T336   | 451. 1503343 | 336. 344 | 4797443. 11  |
| M451T106   | 451. 1605232 | 105. 503 | 4928062. 922 |
| M451T385   | 451. 1763332 | 385. 081 | 23123522. 78 |
| M451T622   | 451. 1911679 | 621. 708 | 3509969. 694 |
| M451T294   | 451. 1877937 | 293. 896 | 7886280. 114 |
| M451T239   | 451. 1903    | 238. 605 | 7820605. 583 |
| M451T266   | 451. 1927052 | 265. 624 | 7490726. 65  |
| M451T534   | 451. 2051663 | 533. 958 | 2174376. 241 |
| M451T701   | 451. 2106922 | 700. 758 | 33676853. 15 |
| M451T480   | 451. 2173988 | 479. 527 | 2379946. 024 |
| M451T798_1 | 451. 2449471 | 797. 773 | 222482613. 7 |
| M451T432   | 451. 2496459 | 431. 64  | 8020875. 475 |
| M451T798_2 | 451. 2560542 | 797. 773 | 189027177. 2 |
| M451T600   | 451. 3161443 | 599. 621 | 4622670. 188 |
| M451T670   | 451. 3415368 | 670. 166 | 2759829. 248 |
| M451T500   | 451. 3540112 | 500. 045 | 2092411. 13  |
| M452T518   | 451. 7311892 | 517. 762 | 2211601. 36  |
| M452T659_1 | 452. 1347856 | 658. 953 | 13403825. 28 |
| M452T649   | 452. 1470658 | 649. 338 | 2906816. 82  |
| M452T659_2 | 452. 1469112 | 658. 953 | 6347744. 799 |
| M452T294_1 | 452. 169717  | 293. 896 | 20009855. 62 |
| M452T219   | 452. 1700561 | 219. 233 | 18588481. 89 |
| M452T163   | 452. 173464  | 162. 728 | 43037147. 45 |
| M452T144   | 452. 1733641 | 143. 959 | 52894824. 73 |
| M452T106   | 452. 1731619 | 105. 503 | 90393389. 47 |
| M452T192   | 452. 1704421 | 192. 437 | 38433327. 71 |
| M452T173   | 452. 1736229 | 173. 407 | 28577758. 46 |
| M452T294_2 | 452. 1831243 | 293. 896 | 15473466. 22 |
| M452T191   | 452. 1829948 | 190. 962 | 17500142. 81 |
| M452T272   | 452. 2075948 | 272. 304 | 1926464. 492 |
| M452T458   | 452. 2217133 | 457. 576 | 2534956. 529 |
| M452T682   | 452. 223731  | 681. 885 | 72250382. 58 |
| M452T668   | 452. 2315609 | 667. 609 | 10321574. 18 |
| M452T679   | 452. 2415066 | 678. 909 | 1876620. 865 |
| M452T626   | 452. 2581537 | 626. 042 | 21587880. 15 |
| M452T798   | 452. 257775  | 797. 773 | 33624283. 76 |
| M452T823   | 452. 2776891 | 822. 881 | 1698717. 783 |
| M453T713_1 | 452. 6964406 | 713. 464 | 2659612. 141 |
| M453T477   | 452. 7207022 | 476. 554 | 1628178. 782 |
| M453T314   | 452. 7442912 | 314. 259 | 3480822. 66  |
| M453T462_1 | 452. 7552806 | 461. 845 | 3232826. 72  |
| M453T372   | 452. 9020819 | 372. 152 | 4772935. 794 |
| M453T462_2 | 453. 0103401 | 461. 845 | 2988430. 228 |
| M453T306   | 453. 0843574 | 306. 247 | 5697348. 215 |
| M453T449   | 453. 1396825 | 448. 978 | 1042734. 147 |
| M453T616   | 453. 1554055 | 615. 594 | 2482739. 155 |
| M453T161   | 453. 1761355 | 161. 494 | 7521140. 197 |

|            |              |          |              |
|------------|--------------|----------|--------------|
| M453T148   | 453. 1761682 | 148. 117 | 7271086. 644 |
| M453T107   | 453. 1790598 | 106. 513 | 18379967. 64 |
| M453T207   | 453. 2058354 | 207. 393 | 2168708. 961 |
| M453T298   | 453. 2118519 | 298. 135 | 2672025. 263 |
| M453T628   | 453. 2624979 | 627. 58  | 6059248. 182 |
| M453T465   | 453. 3319233 | 464. 668 | 5520370. 836 |
| M453T528   | 453. 3314409 | 528. 185 | 2348834. 571 |
| M453T713_2 | 453. 3274187 | 713. 464 | 49607692. 12 |
| M453T713_3 | 453. 3406345 | 713. 464 | 44048024. 67 |
| M454T446   | 453. 7454672 | 445. 984 | 2032000. 615 |
| M454T445   | 453. 9981549 | 444. 725 | 1904089. 176 |
| M454T197   | 454. 1084996 | 196. 644 | 3620489. 002 |
| M454T311   | 454. 1543596 | 311. 445 | 6507318. 955 |
| M454T249   | 454. 1521287 | 248. 895 | 3740933. 274 |
| M454T177   | 454. 1545973 | 177. 295 | 92646893. 64 |
| M454T345   | 454. 1738959 | 344. 555 | 8906987. 421 |
| M454T226   | 454. 1971677 | 226. 202 | 27765773. 35 |
| M454T180   | 454. 1971551 | 179. 75  | 99376933. 69 |
| M454T109   | 454. 1974748 | 108. 698 | 71857949. 75 |
| M454T299   | 454. 2001616 | 299. 493 | 17303247. 91 |
| M454T574   | 454. 2291548 | 574. 363 | 2713246. 947 |
| M454T616   | 454. 2455052 | 615. 594 | 666524. 9153 |
| M454T547   | 454. 3305948 | 546. 651 | 2661776. 273 |
| M455T777   | 455. 1279068 | 777. 245 | 3194129. 174 |
| M455T316   | 455. 1261578 | 315. 701 | 1621761. 826 |
| M455T701_1 | 455. 1610352 | 700. 758 | 90416233. 38 |
| M455T178   | 455. 1576246 | 178. 408 | 13023924. 1  |
| M455T701_2 | 455. 1725455 | 700. 758 | 64288424. 49 |
| M455T799   | 455. 1862704 | 799. 089 | 71544417. 28 |
| M455T829_1 | 455. 1996138 | 828. 73  | 72752594. 75 |
| M455T818_1 | 455. 1998448 | 818. 418 | 42692860. 73 |
| M455T226   | 455. 2056108 | 226. 202 | 5481036. 177 |
| M455T299   | 455. 2047197 | 299. 493 | 2893747. 64  |
| M455T798_1 | 455. 2000349 | 797. 773 | 1607007510   |
| M455T829_2 | 455. 2114942 | 828. 73  | 29664943. 53 |
| M455T110   | 455. 2081085 | 110. 047 | 7004542. 196 |
| M455T818_2 | 455. 2118773 | 818. 418 | 20062398. 28 |
| M455T798_2 | 455. 2125641 | 797. 773 | 463951285. 1 |
| M455T538   | 455. 2221432 | 538. 316 | 2109962. 72  |
| M455T525   | 455. 2255726 | 525. 132 | 2961194. 397 |
| M455T597   | 455. 2270233 | 596. 628 | 1387016. 105 |
| M455T82    | 455. 2336291 | 82. 0569 | 2972158. 554 |
| M455T603   | 455. 3169439 | 602. 513 | 2747174. 903 |
| M455T474   | 455. 3475631 | 473. 597 | 2780851. 815 |
| M455T503   | 455. 3476934 | 503. 046 | 12940772. 31 |
| M455T567   | 455. 3495216 | 567. 1   | 6742880. 441 |
| M456T426_1 | 455. 7429517 | 425. 909 | 950361. 9368 |
| M456T420   | 455. 7556115 | 420. 274 | 855988. 6084 |
| M456T102   | 456. 1665221 | 102. 247 | 3308133. 039 |
| M456T701   | 456. 166474  | 700. 758 | 24658145. 18 |
| M456T345   | 456. 1830017 | 344. 555 | 3057877. 068 |
| M456T223   | 456. 201615  | 223. 474 | 12253378. 68 |
| M456T798_1 | 456. 2012685 | 797. 773 | 352894553. 7 |
| M456T246   | 456. 2058513 | 246. 372 | 22007512. 58 |

|            |              |          |              |
|------------|--------------|----------|--------------|
| M456T104   | 456. 2055686 | 104. 493 | 5399168. 423 |
| M456T305   | 456. 2059101 | 304. 777 | 119031482    |
| M456T798_2 | 456. 2162854 | 797. 773 | 99770648. 24 |
| M456T426_2 | 456. 2451257 | 425. 909 | 15439829. 15 |
| M456T487_1 | 456. 2544211 | 486. 885 | 14815185. 84 |
| M456T499   | 456. 271447  | 498. 645 | 1206331. 741 |
| M456T487_2 | 456. 2659783 | 486. 885 | 19757822. 71 |
| M456T557   | 456. 2836869 | 556. 816 | 1303180. 213 |
| M456T477   | 456. 305203  | 476. 554 | 12261819. 97 |
| M456T636   | 456. 3510889 | 636. 473 | 7062847. 33  |
| M456T576   | 456. 3484873 | 575. 878 | 2135672. 342 |
| M457T171   | 456. 6202672 | 170. 665 | 4432150. 617 |
| M457T426_1 | 456. 7448428 | 425. 909 | 5916091. 61  |
| M457T488   | 456. 7584058 | 488. 437 | 5444139. 307 |
| M457T753_1 | 457. 0620072 | 752. 541 | 11984520. 52 |
| M457T753_2 | 457. 0735581 | 752. 541 | 12526359. 29 |
| M457T645   | 457. 1500544 | 645. 278 | 8999032. 94  |
| M457T605   | 457. 150079  | 605. 264 | 9590479. 796 |
| M457T620   | 457. 157126  | 620. 172 | 39292578. 12 |
| M457T545_1 | 457. 1520539 | 545. 203 | 18887997. 08 |
| M457T632   | 457. 1574933 | 631. 982 | 23659585. 27 |
| M457T91    | 457. 1614623 | 90. 7088 | 97851611. 37 |
| M457T425   | 457. 1788443 | 424. 572 | 1514527. 01  |
| M457T668   | 457. 1859503 | 667. 609 | 7971418. 754 |
| M457T682_1 | 457. 1801927 | 681. 885 | 46892659. 7  |
| M457T682_2 | 457. 1919256 | 681. 885 | 6444582. 595 |
| M457T94    | 457. 1983928 | 93. 7378 | 28432594. 28 |
| M457T248   | 457. 2069552 | 247. 692 | 2932151. 524 |
| M457T798   | 457. 2054214 | 797. 773 | 69042042. 21 |
| M457T305   | 457. 2090712 | 304. 777 | 24529262. 3  |
| M457T398   | 457. 2208336 | 397. 878 | 2493071. 898 |
| M457T386   | 457. 2188303 | 386. 352 | 3127079. 58  |
| M457T821   | 457. 2307723 | 821. 334 | 4413164. 343 |
| M457T521   | 457. 2427022 | 520. 739 | 17090455. 26 |
| M457T477   | 457. 3102082 | 476. 554 | 3503958. 413 |
| M457T768   | 457. 3146442 | 768. 166 | 46768612. 17 |
| M457T636   | 457. 3551916 | 636. 473 | 8361239. 543 |
| M457T622   | 457. 3657458 | 621. 708 | 14461985. 19 |
| M457T580   | 457. 3653763 | 580. 22  | 28044936. 48 |
| M457T676   | 457. 3621266 | 675. 866 | 7911859. 152 |
| M457T762   | 457. 3631218 | 762. 439 | 10137347. 07 |
| M457T591   | 457. 3653865 | 590. 607 | 25161863. 61 |
| M457T545_2 | 457. 3630502 | 545. 203 | 10230401. 91 |
| M457T426_2 | 457. 3630462 | 425. 909 | 21538486. 01 |
| M457T608   | 457. 3655028 | 608. 261 | 13590149. 18 |
| M457T638   | 457. 3656898 | 637. 996 | 11935055. 22 |
| M457T554   | 457. 3701397 | 553. 936 | 11080096. 47 |
| M457T656   | 457. 3679574 | 655. 9   | 9748702. 054 |
| M457T504   | 457. 3682224 | 504. 466 | 7561541. 135 |
| M458T753   | 458. 069502  | 752. 541 | 3737093. 095 |
| M458T92    | 458. 1527282 | 91. 7174 | 43095935. 93 |
| M458T620   | 458. 1615694 | 620. 172 | 5094439. 648 |
| M458T99_1  | 458. 166271  | 98. 9918 | 5412466. 352 |
| M458T91    | 458. 1666908 | 90. 7088 | 16588161. 63 |

|            |              |          |              |
|------------|--------------|----------|--------------|
| M458T99_2  | 458. 1830542 | 98. 9918 | 525919501. 4 |
| M458T89    | 458. 1829836 | 88. 6838 | 10025316. 91 |
| M458T99_3  | 458. 1958436 | 98. 9918 | 132193519. 7 |
| M458T305   | 458. 2108683 | 304. 777 | 2654734. 117 |
| M458T402   | 458. 2267768 | 401. 963 | 2102697. 942 |
| M458T629   | 458. 2516393 | 629. 015 | 1503858. 758 |
| M458T463   | 458. 3229874 | 463. 271 | 4123233. 781 |
| M458T580   | 458. 3648123 | 580. 22  | 6238035. 938 |
| M458T591   | 458. 365069  | 590. 607 | 5276867. 55  |
| M458T426   | 458. 3665196 | 425. 909 | 6639509. 203 |
| M459T420   | 458. 7225694 | 420. 274 | 8455059. 909 |
| M459T82    | 458. 7626164 | 82. 0569 | 72905578. 29 |
| M459T84    | 458. 7774455 | 83. 5661 | 9104961. 763 |
| M459T99    | 459. 1846637 | 98. 9918 | 83304464. 15 |
| M459T371   | 459. 2023844 | 370. 777 | 3183238. 346 |
| M459T305   | 459. 2050884 | 304. 777 | 4986494. 796 |
| M459T519   | 459. 2156705 | 519. 257 | 7232288. 579 |
| M459T429   | 459. 2192661 | 428. 735 | 1946192. 274 |
| M459T809   | 459. 2452073 | 808. 678 | 43195776. 02 |
| M459T824   | 459. 2451657 | 824. 311 | 23813726. 4  |
| M459T838   | 459. 2530477 | 837. 524 | 9362742. 822 |
| M459T779   | 459. 2540209 | 778. 543 | 93341387. 23 |
| M459T741   | 459. 2516426 | 741. 302 | 6475769. 16  |
| M459T771   | 459. 3326681 | 771. 042 | 1984236. 053 |
| M459T728   | 459. 3747318 | 728. 25  | 17148043. 92 |
| M459T719_1 | 459. 3747445 | 719. 215 | 47062188. 36 |
| M459T669   | 459. 3804906 | 668. 867 | 65798943. 55 |
| M459T682   | 459. 3805328 | 681. 885 | 59545681. 97 |
| M459T562_1 | 459. 3805883 | 561. 955 | 415807246. 2 |
| M459T651   | 459. 3848867 | 650. 898 | 18509510. 26 |
| M459T592   | 459. 3806767 | 592. 067 | 41708532. 9  |
| M459T545_1 | 459. 3806493 | 545. 203 | 255867638. 6 |
| M459T694   | 459. 3805683 | 693. 81  | 20624597. 8  |
| M459T614_1 | 459. 3805795 | 614. 215 | 14140995. 82 |
| M459T719_2 | 459. 3890748 | 719. 215 | 49191584. 37 |
| M459T562_2 | 459. 3919207 | 561. 955 | 204996491. 3 |
| M459T545_2 | 459. 3930662 | 545. 203 | 92687222. 05 |
| M459T576   | 459. 3931896 | 575. 878 | 8610079. 157 |
| M459T614_2 | 459. 3926325 | 614. 215 | 5327417. 018 |
| M460T420   | 459. 7354836 | 420. 274 | 1962013. 231 |
| M460T515   | 460. 1512105 | 514. 727 | 867436. 5043 |
| M460T98    | 460. 1866188 | 97. 7824 | 14808051. 58 |
| M460T318   | 460. 1934558 | 318. 497 | 5720302. 319 |
| M460T282   | 460. 1970824 | 281. 666 | 3819124. 362 |
| M460T275   | 460. 1971502 | 274. 968 | 2661454. 918 |
| M460T110_1 | 460. 1958249 | 110. 047 | 74452594. 34 |
| M460T140   | 460. 2052524 | 140. 286 | 13238661. 81 |
| M460T110_2 | 460. 2073831 | 110. 047 | 54349344. 75 |
| M460T830   | 460. 2435979 | 830. 193 | 3538487. 157 |
| M460T811   | 460. 2443349 | 811. 413 | 4722272. 066 |
| M460T823_1 | 460. 2443228 | 822. 881 | 4031959. 741 |
| M460T802   | 460. 2435792 | 801. 685 | 4544220. 513 |
| M460T785   | 460. 2484127 | 785. 136 | 7491053. 497 |
| M460T792   | 460. 2493222 | 792. 146 | 7066400. 322 |

|            |              |          |              |
|------------|--------------|----------|--------------|
| M460T777   | 460. 2479678 | 777. 245 | 6498574. 961 |
| M460T810   | 460. 2582609 | 810. 052 | 20344089. 2  |
| M460T823_2 | 460. 2575912 | 822. 881 | 6218405. 491 |
| M460T474_1 | 460. 2946198 | 473. 597 | 11525873. 7  |
| M460T503   | 460. 2949196 | 503. 046 | 3794064. 826 |
| M460T491   | 460. 2955887 | 491. 373 | 13721118. 61 |
| M460T462   | 460. 306803  | 461. 845 | 20148560. 04 |
| M460T438   | 460. 3016854 | 437. 571 | 17911819. 23 |
| M460T426   | 460. 3070827 | 425. 909 | 6245511. 734 |
| M460T493   | 460. 3063009 | 492. 895 | 33698641. 74 |
| M460T474_2 | 460. 3063618 | 473. 597 | 25211129. 81 |
| M460T620   | 460. 3344077 | 620. 172 | 5088757. 925 |
| M460T541   | 460. 341431  | 541. 275 | 5315573. 086 |
| M460T605   | 460. 3389865 | 605. 264 | 13900818. 47 |
| M460T507   | 460. 3415731 | 507. 343 | 4590891. 835 |
| M460T525   | 460. 3413927 | 525. 132 | 8447104. 58  |
| M460T669   | 460. 3812477 | 668. 867 | 19727124. 33 |
| M460T682   | 460. 3812773 | 681. 885 | 17288447. 16 |
| M460T562   | 460. 3837139 | 561. 955 | 127537260. 5 |
| M460T719   | 460. 3834756 | 719. 215 | 22220093. 3  |
| M460T545   | 460. 3837552 | 545. 203 | 81939817. 24 |
| M461T278   | 461. 0235622 | 277. 699 | 850100. 2223 |
| M461T118   | 461. 0236584 | 118. 116 | 5198976. 315 |
| M461T665   | 461. 0870319 | 664. 745 | 14411412. 75 |
| M461T638   | 461. 1012214 | 637. 996 | 11914429. 21 |
| M461T110   | 461. 2010444 | 110. 047 | 13458095. 07 |
| M461T580   | 461. 2474099 | 580. 22  | 4346211. 03  |
| M461T565   | 461. 2562063 | 564. 534 | 71051598. 61 |
| M461T474   | 461. 3055207 | 473. 597 | 6706548. 47  |
| M461T525   | 461. 3427711 | 525. 132 | 2224043. 843 |
| M461T562   | 461. 3854296 | 561. 955 | 19401047. 91 |
| M461T649   | 461. 3977381 | 649. 338 | 13300143. 73 |
| M461T703   | 461. 4019898 | 703. 35  | 9558373. 551 |
| M462T565   | 461. 7569961 | 564. 534 | 39009655. 94 |
| M462T665   | 462. 0928014 | 664. 745 | 2142585. 782 |
| M462T218   | 462. 1582499 | 217. 866 | 1706891. 172 |
| M462T104   | 462. 1699883 | 104. 493 | 5304479. 28  |
| M462T92    | 462. 1784995 | 91. 7174 | 36694790. 34 |
| M462T516   | 462. 2142347 | 516. 214 | 5096236. 469 |
| M462T477   | 462. 2294573 | 476. 554 | 7725923. 297 |
| M462T803   | 462. 2807844 | 802. 88  | 2693478. 613 |
| M462T588   | 462. 3076764 | 587. 521 | 3429290. 61  |
| M462T595   | 462. 3079211 | 595. 066 | 1809432. 698 |
| M462T481   | 462. 3172999 | 481. 042 | 9677511. 799 |
| M462T449   | 462. 3174688 | 448. 978 | 8933125. 645 |
| M462T512   | 462. 3171548 | 511. 77  | 12091092. 28 |
| M462T488   | 462. 3229933 | 488. 437 | 7471128. 851 |
| M462T548   | 462. 3555376 | 548. 114 | 9399898. 99  |
| M462T649   | 462. 398712  | 649. 338 | 3177040. 067 |
| M462T703   | 462. 3992148 | 703. 35  | 2014990. 71  |
| M463T335   | 463. 1518795 | 334. 966 | 1000538. 606 |
| M463T99    | 463. 200497  | 98. 9918 | 28049018. 05 |
| M463T106   | 463. 2007038 | 105. 503 | 36264856. 81 |
| M463T144   | 463. 1977719 | 143. 959 | 6436995. 731 |



|            |              |          |              |
|------------|--------------|----------|--------------|
| M463T328_1 | 463. 2003225 | 328. 106 | 4430803. 068 |
| M463T301   | 463. 1999713 | 300. 782 | 3756476. 398 |
| M463T314   | 463. 204199  | 314. 259 | 4942854. 485 |
| M463T328_2 | 463. 2108922 | 328. 106 | 2221706. 255 |
| M463T425   | 463. 2111323 | 424. 572 | 3158004. 277 |
| M463T574   | 463. 2294621 | 574. 363 | 31119482. 1  |
| M463T477   | 463. 233704  | 476. 554 | 1763129. 791 |
| M463T830   | 463. 2995502 | 830. 193 | 2964469. 73  |
| M463T482   | 463. 3572582 | 482. 436 | 700502. 0738 |
| M464T456_1 | 463. 7536305 | 456. 126 | 2285666. 054 |
| M464T465   | 463. 7538278 | 464. 668 | 2528258. 646 |
| M464T164   | 464. 1829543 | 163. 846 | 8716550. 568 |
| M464T306   | 464. 1835304 | 306. 247 | 33006826. 07 |
| M464T106   | 464. 1832175 | 105. 503 | 17079588. 12 |
| M464T143   | 464. 1829411 | 142. 85  | 11416030. 79 |
| M464T276   | 464. 1828625 | 276. 414 | 21489196. 43 |
| M464T180   | 464. 1876679 | 179. 75  | 9105786. 135 |
| M464T388   | 464. 1872592 | 387. 763 | 1652914. 259 |
| M464T308   | 464. 1989147 | 307. 735 | 4281886. 146 |
| M464T190   | 464. 1962306 | 189. 571 | 10271086. 39 |
| M464T198   | 464. 1960873 | 198. 072 | 12302730. 67 |
| M464T451   | 464. 2195739 | 450. 503 | 1744304. 173 |
| M464T747   | 464. 22292   | 746. 977 | 14653140. 08 |
| M464T324   | 464. 2242096 | 323. 984 | 3347005. 192 |
| M464T456_2 | 464. 2478325 | 456. 126 | 3698513. 621 |
| M464T748   | 464. 2587257 | 748. 486 | 13184247. 39 |
| M464T439   | 464. 2611128 | 439. 021 | 3408322. 819 |
| M464T730   | 464. 2670822 | 729. 798 | 26620446. 64 |
| M464T393   | 464. 2923814 | 392. 715 | 3339672. 056 |
| M464T669   | 464. 3870439 | 668. 867 | 30997971. 16 |
| M464T562_1 | 464. 3819199 | 561. 955 | 100811158. 7 |
| M464T741   | 464. 382666  | 741. 302 | 7425369. 997 |
| M464T576   | 464. 3824521 | 575. 878 | 6201665. 985 |
| M464T545   | 464. 3915323 | 545. 203 | 48515308. 08 |
| M464T562_2 | 464. 3935043 | 561. 955 | 75063012. 23 |
| M465T500   | 465. 1706401 | 500. 045 | 4206777. 232 |
| M465T419   | 465. 1860959 | 418. 97  | 1831951. 678 |
| M465T306   | 465. 1933721 | 306. 247 | 5389814. 897 |
| M465T191   | 465. 1917084 | 190. 962 | 2001572. 001 |
| M465T198   | 465. 1920299 | 198. 072 | 4338698. 647 |
| M465T276   | 465. 1922666 | 276. 414 | 3962095. 571 |
| M465T601   | 465. 221849  | 601. 04  | 5517037. 459 |
| M465T747   | 465. 225808  | 746. 977 | 3118791. 152 |
| M465T475   | 465. 2351492 | 475. 007 | 2095796. 882 |
| M465T730   | 465. 2705632 | 729. 798 | 7102691. 911 |
| M465T669   | 465. 3859417 | 668. 867 | 7006312. 891 |
| M465T562   | 465. 3942379 | 561. 955 | 35856392. 36 |
| M466T177   | 466. 1177408 | 177. 295 | 6424578. 844 |
| M466T195   | 466. 114125  | 195. 23  | 38797384. 08 |
| M466T374   | 466. 1677401 | 373. 532 | 1947452. 389 |
| M466T309   | 466. 1916026 | 308. 967 | 777247. 3022 |
| M466T688   | 466. 1952352 | 687. 95  | 1290267. 598 |
| M466T382   | 466. 1997879 | 382. 125 | 1515701. 554 |
| M466T168   | 466. 2036505 | 167. 804 | 3027940. 311 |

|          |              |          |              |
|----------|--------------|----------|--------------|
| M466T725 | 466. 2386406 | 725. 212 | 15579073. 56 |
| M466T649 | 466. 4026884 | 649. 338 | 19466589. 98 |
| M466T703 | 466. 4075573 | 703. 35  | 25369641. 44 |
| M467T195 | 467. 1140978 | 195. 23  | 5571887. 58  |
| M467T294 | 467. 138174  | 293. 896 | 953251. 6456 |
| M467T144 | 467. 1822487 | 143. 959 | 28627849. 32 |
| M467T106 | 467. 1847063 | 105. 503 | 33554476. 18 |
| M467T158 | 467. 1895036 | 157. 773 | 11953926. 8  |
| M467T353 | 467. 197979  | 352. 65  | 1190369. 254 |
| M467T396 | 467. 2535573 | 396. 415 | 4305707. 774 |
| M467T595 | 467. 3152974 | 595. 066 | 15372149. 06 |
| M467T838 | 467. 3866603 | 837. 524 | 7250967. 635 |
| M467T527 | 467. 3857169 | 526. 676 | 5379540. 467 |
| M467T32  | 467. 3910577 | 32. 4171 | 2242329. 137 |
| M467T651 | 467. 3977779 | 650. 898 | 1948044. 367 |
| M467T703 | 467. 4022879 | 703. 35  | 9559892. 076 |
| M468T293 | 468. 166179  | 292. 623 | 5461562. 877 |
| M468T143 | 468. 1681158 | 142. 85  | 33078115. 64 |
| M468T104 | 468. 1679556 | 104. 493 | 94162930. 51 |
| M468T180 | 468. 1756287 | 179. 75  | 7674860. 777 |
| M468T297 | 468. 2171514 | 296. 739 | 3643752. 941 |
| M468T580 | 468. 277114  | 580. 22  | 4014919. 233 |
| M468T429 | 468. 2768934 | 428. 735 | 3194751. 558 |
| M468T794 | 468. 2886626 | 793. 649 | 9411472. 159 |
| M468T811 | 468. 3114933 | 811. 413 | 3376087. 766 |
| M468T527 | 468. 3878685 | 526. 676 | 1380617. 984 |
| M468T32  | 468. 3939164 | 32. 4171 | 1023509. 257 |
| M469T75  | 468. 9100224 | 74. 9588 | 9499527. 98  |
| M469T649 | 469. 1532931 | 649. 338 | 3466217. 096 |
| M469T299 | 469. 1568914 | 299. 493 | 20463089. 78 |
| M469T317 | 469. 1567612 | 317. 199 | 15937800. 84 |
| M469T104 | 469. 1723334 | 104. 493 | 16535467. 14 |
| M469T144 | 469. 1751142 | 143. 959 | 5043469. 036 |
| M469T506 | 469. 178922  | 505. 855 | 6093467. 388 |
| M469T748 | 469. 1865065 | 748. 486 | 11175166. 7  |
| M469T429 | 469. 2874314 | 428. 735 | 353434. 6132 |
| M469T605 | 469. 2963979 | 605. 264 | 1912014. 368 |
| M469T600 | 469. 3275164 | 599. 621 | 26667383. 01 |
| M469T688 | 469. 3291545 | 687. 95  | 7306679. 043 |
| M469T502 | 469. 364995  | 501. 549 | 3636446. 535 |
| M470T566 | 469. 7415557 | 565. 79  | 1921121. 149 |
| M470T75  | 469. 9119361 | 74. 9588 | 7494467. 223 |
| M470T359 | 470. 089331  | 359. 32  | 1752460. 047 |
| M470T713 | 470. 1135211 | 713. 464 | 1320829. 212 |
| M470T310 | 470. 1269662 | 310. 075 | 635097. 0802 |
| M470T301 | 470. 1529524 | 300. 782 | 2498644. 979 |
| M470T161 | 470. 182383  | 161. 494 | 5124778. 379 |
| M470T143 | 470. 1827531 | 142. 85  | 20334332. 76 |
| M470T747 | 470. 1836371 | 746. 977 | 2794070. 015 |
| M470T89  | 470. 1823457 | 88. 6838 | 48702016. 78 |
| M470T104 | 470. 1826542 | 104. 493 | 80431929. 8  |
| M470T119 | 470. 18957   | 119. 433 | 6352353. 464 |
| M470T471 | 470. 2110027 | 470. 602 | 2336783. 553 |
| M470T469 | 470. 2567597 | 469. 252 | 1848130. 123 |

|            |              |          |              |
|------------|--------------|----------|--------------|
| M470T785   | 470. 3244132 | 785. 136 | 795544. 9856 |
| M470T488   | 470. 3240019 | 488. 437 | 2754523. 434 |
| M471T385   | 470. 5818699 | 385. 081 | 846715. 2943 |
| M471T559   | 471. 1698374 | 559. 459 | 12914427. 53 |
| M471T798   | 471. 1750509 | 797. 773 | 122827981. 7 |
| M471T299   | 471. 1937804 | 299. 493 | 6400118. 001 |
| M471T725   | 471. 1993064 | 725. 212 | 16490406. 86 |
| M471T347   | 471. 2018714 | 347. 175 | 8785681. 002 |
| M471T600   | 471. 2168892 | 599. 621 | 6586360. 919 |
| M471T589   | 471. 2165418 | 589. 053 | 3127994. 307 |
| M471T567   | 471. 2192346 | 567. 1   | 6850843. 031 |
| M471T577   | 471. 2417239 | 577. 366 | 1006315. 991 |
| M471T652   | 471. 2443006 | 651. 956 | 3871399. 244 |
| M471T604   | 471. 3072298 | 603. 95  | 1032172. 644 |
| M471T713   | 471. 3447367 | 713. 464 | 13075604. 47 |
| M472T567   | 471. 7209072 | 567. 1   | 4690269. 076 |
| M472T652   | 471. 7427593 | 651. 956 | 2495150. 313 |
| M472T528   | 472. 1184834 | 528. 185 | 6805574. 545 |
| M472T98    | 472. 1611543 | 97. 7824 | 47000975. 74 |
| M472T777   | 472. 1590891 | 777. 245 | 12581825. 78 |
| M472T408   | 472. 1786771 | 407. 724 | 5185182. 264 |
| M472T798   | 472. 1767296 | 797. 773 | 28183433. 86 |
| M472T588   | 472. 1765702 | 587. 521 | 10799300. 51 |
| M472T109   | 472. 1970711 | 108. 698 | 15733219. 15 |
| M472T603   | 472. 2343747 | 602. 513 | 5837747. 873 |
| M472T418   | 472. 2845466 | 417. 676 | 3170367. 386 |
| M472T713   | 472. 3547838 | 713. 464 | 1484310. 735 |
| M473T419   | 472. 7804063 | 418. 97  | 1924224. 99  |
| M473T347   | 473. 1219601 | 347. 175 | 2975210. 008 |
| M473T218   | 473. 177156  | 217. 866 | 2926842. 249 |
| M473T798   | 473. 1820293 | 797. 773 | 2621180. 463 |
| M473T308   | 473. 2433969 | 307. 735 | 3157274. 881 |
| M473T549   | 473. 2735356 | 549. 375 | 899970. 955  |
| M473T567   | 473. 358993  | 567. 1   | 1305359. 145 |
| M474T440   | 473. 738733  | 440. 459 | 3054472. 612 |
| M474T192   | 474. 1597283 | 192. 437 | 17377069. 66 |
| M474T152   | 474. 162312  | 152. 375 | 17823275. 33 |
| M474T194   | 474. 1734803 | 193. 823 | 2779016. 133 |
| M474T248   | 474. 2121105 | 247. 692 | 7025182. 778 |
| M474T430   | 474. 2593025 | 430. 131 | 1697542. 595 |
| M474T810   | 474. 2695495 | 810. 052 | 825818. 9005 |
| M474T541   | 474. 291074  | 541. 275 | 3018467. 842 |
| M475T175   | 475. 0615011 | 174. 865 | 3029400. 393 |
| M475T605   | 475. 1601714 | 605. 264 | 7975510. 079 |
| M475T230   | 475. 1674252 | 230. 321 | 2630222. 884 |
| M475T620   | 475. 1676864 | 620. 172 | 37692284. 02 |
| M475T192   | 475. 1675357 | 192. 437 | 14509527. 68 |
| M475T246   | 475. 2173605 | 246. 372 | 978565. 201  |
| M475T374_1 | 475. 2476793 | 373. 532 | 1764022. 914 |
| M475T478   | 475. 2522582 | 477. 989 | 3454234. 718 |
| M475T468   | 475. 2521278 | 467. 706 | 12031769. 22 |
| M475T443   | 475. 2515501 | 443. 256 | 7853722. 919 |
| M475T374_2 | 475. 2623798 | 373. 532 | 1727984. 308 |
| M475T718   | 475. 3257869 | 717. 959 | 34739735. 17 |

|            |              |          |              |
|------------|--------------|----------|--------------|
| M475T776   | 475. 3361939 | 776. 194 | 6952087. 053 |
| M475T660   | 475. 3841751 | 660. 455 | 863713. 3804 |
| M476T173   | 476. 132933  | 173. 407 | 3441614. 369 |
| M476T91    | 476. 1573816 | 90. 7088 | 14474850. 65 |
| M476T316   | 476. 172175  | 315. 701 | 1844019. 153 |
| M476T519   | 476. 211714  | 519. 257 | 1678588. 358 |
| M476T764   | 476. 2240488 | 763. 856 | 1251509. 063 |
| M476T496   | 476. 2525723 | 495. 779 | 5432477. 519 |
| M476T461_1 | 476. 2963727 | 460. 537 | 15191440. 66 |
| M476T475   | 476. 3110882 | 475. 007 | 3575020. 794 |
| M476T461_2 | 476. 3083144 | 460. 537 | 2186955. 192 |
| M476T426   | 476. 3323466 | 425. 909 | 1798788. 034 |
| M476T660   | 476. 3759742 | 660. 455 | 2034006. 86  |
| M477T118   | 476. 9973295 | 118. 116 | 5369587. 576 |
| M477T469   | 477. 1000723 | 469. 252 | 1414237. 722 |
| M477T777   | 477. 1395683 | 777. 245 | 3390879. 402 |
| M477T620   | 477. 1670393 | 620. 172 | 1790004. 104 |
| M477T743   | 477. 211482  | 742. 68  | 46016353. 6  |
| M477T641   | 477. 2059176 | 640. 717 | 1540862. 639 |
| M477T487_1 | 477. 2621485 | 486. 885 | 11705898. 65 |
| M477T487_2 | 477. 2741654 | 486. 885 | 23212009. 43 |
| M477T459   | 477. 3012447 | 458. 985 | 3852163. 557 |
| M477T541   | 477. 3880102 | 541. 275 | 16390903. 88 |
| M477T531   | 477. 3879532 | 531. 127 | 11592825. 21 |
| M477T551   | 477. 3892369 | 550. 919 | 7177852. 712 |
| M478T420_1 | 477. 7478481 | 420. 274 | 9531967. 303 |
| M478T463_1 | 477. 7700529 | 463. 271 | 1801114. 918 |
| M478T463_2 | 478. 0079599 | 463. 271 | 1993842. 851 |
| M478T388   | 478. 1979776 | 387. 763 | 1369254. 681 |
| M478T538   | 478. 2162499 | 538. 316 | 1313248. 008 |
| M478T701_1 | 478. 2299145 | 700. 758 | 8480283. 335 |
| M478T783   | 478. 2376181 | 782. 558 | 22078560. 25 |
| M478T701_2 | 478. 2415852 | 700. 758 | 34261929. 43 |
| M478T420_2 | 478. 2584668 | 420. 274 | 4007228. 502 |
| M478T485   | 478. 270186  | 485. 471 | 7458559. 517 |
| M478T829   | 478. 2783909 | 828. 73  | 56323241. 12 |
| M478T818   | 478. 2782358 | 818. 418 | 33895567. 72 |
| M478T798   | 478. 2782579 | 797. 773 | 790268942. 5 |
| M478T32    | 478. 2856578 | 32. 4171 | 4126379. 134 |
| M478T754   | 478. 335286  | 753. 987 | 18589344. 3  |
| M479T113   | 479. 0315258 | 112. 781 | 5291313. 699 |
| M479T804   | 479. 0892144 | 804. 327 | 7164626. 654 |
| M479T665   | 479. 0987948 | 664. 745 | 39930346. 74 |
| M479T652   | 479. 0985217 | 651. 956 | 6924721. 394 |
| M479T677   | 479. 0989377 | 677. 376 | 4189778. 704 |
| M479T538   | 479. 112124  | 538. 316 | 6681983. 657 |
| M479T350   | 479. 1381771 | 349. 911 | 1798261. 509 |
| M479T311   | 479. 146898  | 311. 445 | 3122322. 17  |
| M479T304   | 479. 1463588 | 303. 513 | 3199133. 393 |
| M479T656   | 479. 2215387 | 655. 9   | 7067717. 048 |
| M479T487   | 479. 2767403 | 486. 885 | 972309. 7311 |
| M479T798_1 | 479. 2755294 | 797. 773 | 168200558. 9 |
| M479T798_2 | 479. 2867248 | 797. 773 | 144011763. 5 |
| M480T446   | 479. 7227973 | 445. 984 | 1393872. 86  |

|            |              |          |              |
|------------|--------------|----------|--------------|
| M480T504   | 479. 8638109 | 504. 466 | 2652926. 656 |
| M480T803   | 480. 0940274 | 802. 88  | 2797915. 937 |
| M480T164   | 480. 1775076 | 163. 846 | 12179824. 82 |
| M480T106   | 480. 1799997 | 105. 503 | 26977033. 58 |
| M480T143   | 480. 1771715 | 142. 85  | 8864185. 652 |
| M480T181   | 480. 184019  | 181. 154 | 5218405. 14  |
| M480T310   | 480. 2148423 | 310. 075 | 16845916. 48 |
| M480T320   | 480. 2151149 | 319. 758 | 15896051. 45 |
| M480T580   | 480. 2247076 | 580. 22  | 2257933. 156 |
| M480T568   | 480. 2276828 | 568. 464 | 6608898. 196 |
| M480T682_1 | 480. 243806  | 681. 885 | 6270530. 802 |
| M480T682_2 | 480. 2558655 | 681. 885 | 55243842. 5  |
| M480T798   | 480. 2810571 | 797. 773 | 37574374. 66 |
| M480T767   | 480. 3546319 | 766. 742 | 3408757. 646 |
| M481T568_1 | 480. 7282485 | 568. 464 | 3696818. 996 |
| M481T665   | 481. 1079969 | 664. 745 | 1348268. 89  |
| M481T308   | 481. 1191737 | 307. 735 | 2804858. 079 |
| M481T144   | 481. 1144369 | 143. 959 | 10491606. 52 |
| M481T298   | 481. 1192428 | 298. 135 | 3097875. 182 |
| M481T568_2 | 481. 1408657 | 568. 464 | 1991549. 767 |
| M481T474   | 481. 1742398 | 473. 597 | 4480659. 987 |
| M481T311   | 481. 2168939 | 311. 445 | 2558313. 176 |
| M481T272   | 481. 2130611 | 272. 304 | 855122. 1392 |
| M481T87_1  | 481. 2106853 | 86. 6643 | 475299560. 4 |
| M481T320   | 481. 2168409 | 319. 758 | 1676046. 818 |
| M481T788   | 481. 2294235 | 787. 856 | 8263748. 346 |
| M481T87_2  | 481. 2260913 | 86. 6643 | 17831749. 61 |
| M482T142   | 482. 1948665 | 141. 825 | 36584205. 54 |
| M482T129   | 482. 1944302 | 129. 234 | 3924405. 379 |
| M482T104   | 482. 1947234 | 104. 493 | 81856103. 24 |
| M482T106   | 482. 2094334 | 105. 503 | 6918136. 371 |
| M482T87    | 482. 2120823 | 86. 6643 | 85086969. 62 |
| M482T509   | 482. 253984  | 508. 883 | 3072998. 696 |
| M482T833   | 482. 28487   | 833. 029 | 2746919. 092 |
| M482T804   | 482. 3201033 | 804. 327 | 183839395    |
| M482T32    | 482. 3250917 | 32. 4171 | 35238899. 71 |
| M482T813   | 482. 3551672 | 812. 862 | 23948965. 13 |
| M482T824   | 482. 3551148 | 824. 311 | 7790065. 463 |
| M482T838   | 482. 3551885 | 837. 524 | 3543362. 028 |
| M482T779   | 482. 3551485 | 778. 543 | 127584956. 7 |
| M482T562_1 | 482. 3918894 | 561. 955 | 48597882. 02 |
| M482T576   | 482. 3934325 | 575. 878 | 3886030. 582 |
| M482T741   | 482. 396554  | 741. 302 | 17702091. 9  |
| M482T562_2 | 482. 4031944 | 561. 955 | 60419662. 93 |
| M483T452   | 482. 5045886 | 451. 804 | 2581154. 365 |
| M483T727   | 483. 0400925 | 726. 707 | 2679886. 921 |
| M483T659   | 483. 0403067 | 658. 953 | 9971643. 149 |
| M483T783   | 483. 1893642 | 782. 558 | 15635479. 39 |
| M483T104   | 483. 1964135 | 104. 493 | 10476779. 46 |
| M483T781   | 483. 2025428 | 781. 303 | 28118660. 07 |
| M483T339   | 483. 2260253 | 339. 085 | 4217407. 702 |
| M483T87    | 483. 221899  | 86. 6643 | 10504022. 95 |
| M483T694   | 483. 2218313 | 693. 81  | 6548810. 53  |
| M483T32_1  | 483. 3202217 | 32. 4171 | 5200845. 28  |

|            |              |          |              |
|------------|--------------|----------|--------------|
| M483T803   | 483. 3216598 | 802. 88  | 40890990. 35 |
| M483T777   | 483. 3600121 | 777. 245 | 32622440. 67 |
| M483T31    | 483. 3746654 | 31. 4047 | 1715920. 817 |
| M483T32_2  | 483. 3859288 | 32. 4171 | 2198583. 559 |
| M483T792   | 483. 3861534 | 792. 146 | 3534231. 361 |
| M484T309   | 483. 7206456 | 308. 967 | 2028716. 125 |
| M484T683   | 483. 7417407 | 683. 436 | 1963798. 378 |
| M484T574   | 483. 7485296 | 574. 363 | 4702435. 727 |
| M484T164_1 | 484. 1245427 | 163. 846 | 19470004. 2  |
| M484T164_2 | 484. 1355151 | 163. 846 | 1686310. 223 |
| M484T106   | 484. 1616545 | 105. 503 | 26610510. 17 |
| M484T781   | 484. 2053619 | 781. 303 | 6354829. 032 |
| M484T463   | 484. 2320274 | 463. 271 | 986726. 6211 |
| M484T425   | 484. 2599449 | 424. 572 | 2779080. 55  |
| M484T527   | 484. 3065254 | 526. 676 | 1676535. 892 |
| M484T617   | 484. 3117443 | 617. 133 | 3042467. 321 |
| M485T425   | 484. 5869594 | 424. 572 | 1512806. 051 |
| M485T427_1 | 484. 7524192 | 427. 362 | 7290168. 407 |
| M485T164   | 485. 1312893 | 163. 846 | 2181472. 019 |
| M485T458   | 485. 1607817 | 457. 576 | 2820966. 255 |
| M485T314   | 485. 2085112 | 314. 259 | 1932957. 403 |
| M485T802   | 485. 208157  | 801. 685 | 21452135. 58 |
| M485T355   | 485. 219718  | 355. 41  | 9081811. 277 |
| M485T427_2 | 485. 2679542 | 427. 362 | 3683938. 67  |
| M485T703_1 | 485. 2696211 | 703. 35  | 4636710. 774 |
| M485T583   | 485. 2731381 | 583. 068 | 1428460. 934 |
| M485T617   | 485. 3237095 | 617. 133 | 21165301. 71 |
| M485T528   | 485. 3225434 | 528. 185 | 11957179. 26 |
| M485T595   | 485. 3237592 | 595. 066 | 62762017. 67 |
| M485T669   | 485. 328964  | 668. 867 | 17732164. 36 |
| M485T838   | 485. 3966017 | 837. 524 | 14276935. 6  |
| M485T703_2 | 485. 4187233 | 703. 35  | 1954265. 515 |
| M486T427   | 485. 7685513 | 427. 362 | 1253935. 75  |
| M486T163   | 486. 1831472 | 162. 728 | 7255261. 623 |
| M486T306   | 486. 1830912 | 306. 247 | 22925550. 57 |
| M486T143   | 486. 1834922 | 142. 85  | 12466508. 59 |
| M486T121   | 486. 1831194 | 120. 525 | 20552322. 1  |
| M486T87    | 486. 1832526 | 86. 6643 | 45280236. 34 |
| M486T104   | 486. 1832839 | 104. 493 | 115993119. 3 |
| M486T324   | 486. 1960944 | 323. 984 | 21338779. 24 |
| M486T803   | 486. 2239134 | 802. 88  | 8764451. 663 |
| M486T355   | 486. 2302268 | 355. 41  | 1039285. 956 |
| M486T545   | 486. 2454886 | 545. 203 | 73414663. 29 |
| M486T616   | 486. 2524713 | 615. 594 | 4232190. 961 |
| M486T528   | 486. 2525464 | 528. 185 | 2701702. 309 |
| M486T371   | 486. 2632683 | 370. 777 | 2100229. 844 |
| M486T595   | 486. 3255281 | 595. 066 | 18250325. 63 |
| M487T547_1 | 486. 7445539 | 546. 651 | 33080526. 49 |
| M487T84    | 486. 9441147 | 83. 5661 | 22099221. 46 |
| M487T122   | 487. 0178682 | 122. 007 | 5996687. 509 |
| M487T291_1 | 487. 1558872 | 291. 307 | 31367218. 28 |
| M487T158   | 487. 1633345 | 157. 773 | 36747920. 87 |
| M487T180   | 487. 163317  | 179. 75  | 58291926. 34 |
| M487T649_1 | 487. 1600188 | 649. 338 | 405433784. 4 |

|            |              |          |              |
|------------|--------------|----------|--------------|
| M487T143   | 487. 1634304 | 142. 85  | 42497910. 17 |
| M487T96_1  | 487. 1631471 | 95. 7572 | 680974164. 8 |
| M487T620   | 487. 1607138 | 620. 172 | 22511786. 34 |
| M487T703   | 487. 1591422 | 703. 35  | 21842889. 77 |
| M487T632   | 487. 1605523 | 631. 982 | 37053450. 74 |
| M487T209   | 487. 1634168 | 208. 905 | 12714718. 9  |
| M487T291_2 | 487. 166099  | 291. 307 | 57072977. 01 |
| M487T649_2 | 487. 1707481 | 649. 338 | 276248138. 4 |
| M487T96_2  | 487. 1767247 | 95. 7572 | 118827015. 7 |
| M487T306   | 487. 1847808 | 306. 247 | 1708814. 81  |
| M487T438   | 487. 1986875 | 437. 571 | 323109. 6001 |
| M487T525   | 487. 21282   | 525. 132 | 17109521. 1  |
| M487T432   | 487. 2395961 | 431. 64  | 489900. 1653 |
| M487T547_2 | 487. 2460207 | 546. 651 | 9781898. 168 |
| M487T600   | 487. 3376437 | 599. 621 | 56733711. 29 |
| M487T540   | 487. 3351834 | 539. 764 | 3833140. 745 |
| M487T567   | 487. 341768  | 567. 1   | 16486648. 69 |
| M488T449   | 488. 1507101 | 448. 978 | 2696152. 363 |
| M488T649   | 488. 1655696 | 649. 338 | 84700075. 62 |
| M488T291   | 488. 1665017 | 291. 307 | 10644820. 81 |
| M488T122   | 488. 1716902 | 122. 007 | 4606915. 664 |
| M488T96    | 488. 1718656 | 95. 7572 | 112372135. 9 |
| M488T218   | 488. 1743268 | 217. 866 | 2018345. 207 |
| M488T101   | 488. 1921198 | 101. 161 | 31784919. 07 |
| M488T89_1  | 488. 1918669 | 88. 6838 | 117929265. 2 |
| M488T89_2  | 488. 202472  | 88. 6838 | 80379794. 38 |
| M488T600   | 488. 3411846 | 599. 621 | 17374910. 11 |
| M488T567   | 488. 353545  | 567. 1   | 3202946. 93  |
| M489T462_1 | 488. 8870919 | 461. 845 | 3345797. 431 |
| M489T84    | 488. 9345291 | 83. 5661 | 7358314. 797 |
| M489T176   | 489. 0617353 | 175. 952 | 6765545. 8   |
| M489T206   | 489. 1497539 | 205. 903 | 3091813. 721 |
| M489T94    | 489. 1655056 | 93. 7378 | 12285620. 9  |
| M489T100   | 489. 1656938 | 100. 146 | 10258452. 51 |
| M489T649   | 489. 1642564 | 649. 338 | 12266033. 86 |
| M489T89    | 489. 195526  | 88. 6838 | 18537999. 5  |
| M489T462_2 | 489. 2215781 | 461. 845 | 3809330. 294 |
| M489T393   | 489. 2468527 | 392. 715 | 127631692. 3 |
| M489T433   | 489. 2591505 | 433. 111 | 2070582. 431 |
| M489T833   | 489. 3156383 | 833. 029 | 1167820. 182 |
| M490T93    | 490. 1596826 | 92. 7272 | 3277212. 253 |
| M490T101   | 490. 1700593 | 101. 161 | 13582623. 67 |
| M490T92    | 490. 1702449 | 91. 7174 | 87095336. 45 |
| M490T345   | 490. 1856693 | 344. 555 | 26246278. 28 |
| M490T393_1 | 490. 2314352 | 392. 715 | 6489328. 968 |
| M490T393_2 | 490. 2452274 | 392. 715 | 49485829. 46 |
| M490T792   | 490. 3566899 | 792. 146 | 6013429. 117 |
| M491T792   | 490. 6838784 | 792. 146 | 6176475. 147 |
| M491T310   | 491. 1406421 | 310. 075 | 12202567. 62 |
| M491T499   | 491. 1790521 | 498. 645 | 1923045. 928 |
| M491T92    | 491. 1826805 | 91. 7174 | 18046263. 13 |
| M491T345   | 491. 1907637 | 344. 555 | 6923836. 227 |
| M491T393_1 | 491. 2200301 | 392. 715 | 4113336. 928 |
| M491T776_1 | 491. 2216    | 776. 194 | 20813600. 17 |

|            |              |          |              |
|------------|--------------|----------|--------------|
| M491T367   | 491. 2305813 | 366. 514 | 2924147. 794 |
| M491T776_2 | 491. 2327371 | 776. 194 | 9758773. 296 |
| M491T393_2 | 491. 2426373 | 392. 715 | 6680906. 576 |
| M491T521   | 491. 2732255 | 520. 739 | 4378323. 28  |
| M491T798   | 491. 2693324 | 797. 773 | 22389158. 2  |
| M491T772   | 491. 2950764 | 772. 206 | 1207105. 737 |
| M491T594   | 491. 3209226 | 593. 62  | 1203187. 485 |
| M492T642   | 491. 7406152 | 642. 211 | 2045718. 285 |
| M492T151   | 492. 1715382 | 151. 016 | 2005596. 237 |
| M492T645   | 492. 1883607 | 645. 278 | 15882313. 15 |
| M492T620   | 492. 1884146 | 620. 172 | 36562607. 06 |
| M492T308   | 492. 203397  | 307. 735 | 1606832. 596 |
| M492T456   | 492. 2076177 | 456. 126 | 1768060. 359 |
| M492T776   | 492. 2260139 | 776. 194 | 4228097. 604 |
| M492T703   | 492. 2319655 | 703. 35  | 4617918. 214 |
| M492T798   | 492. 2803633 | 797. 773 | 4155554. 086 |
| M493T620   | 493. 1997438 | 620. 172 | 4085001. 676 |
| M493T576   | 493. 2194224 | 575. 878 | 5128393. 094 |
| M493T703_1 | 493. 2462668 | 703. 35  | 75832776. 43 |
| M493T719_1 | 493. 2501707 | 719. 215 | 95114117. 43 |
| M493T703_2 | 493. 2579347 | 703. 35  | 103772355. 4 |
| M493T538   | 493. 2684748 | 538. 316 | 2318439. 587 |
| M493T719_2 | 493. 2670447 | 719. 215 | 13675360. 8  |
| M493T469   | 493. 2749354 | 469. 252 | 9098948. 14  |
| M494T703_1 | 493. 7419239 | 703. 35  | 10181445. 11 |
| M494T703_2 | 493. 754441  | 703. 35  | 72353283. 05 |
| M494T703_3 | 493. 7648433 | 703. 35  | 21143556. 53 |
| M494T419   | 493. 7728125 | 418. 97  | 1069264. 259 |
| M494T275   | 494. 1814414 | 274. 968 | 6920996. 684 |
| M494T415   | 494. 2204844 | 414. 82  | 13261651. 23 |
| M494T568   | 494. 2222668 | 568. 464 | 2560861. 674 |
| M494T342   | 494. 2294783 | 341. 802 | 1681528. 711 |
| M494T576   | 494. 2296132 | 575. 878 | 1349953. 591 |
| M494T743_1 | 494. 2323507 | 742. 68  | 182638503. 1 |
| M494T597   | 494. 2385447 | 596. 628 | 1859422. 022 |
| M494T743_2 | 494. 247561  | 742. 68  | 43265654. 71 |
| M494T702   | 494. 2570224 | 702. 055 | 23096037. 68 |
| M494T719   | 494. 2634219 | 719. 215 | 20475711. 19 |
| M494T371   | 494. 2728753 | 370. 777 | 3074006. 196 |
| M494T469   | 494. 2804866 | 469. 252 | 2124865. 372 |
| M494T830   | 494. 3195495 | 830. 193 | 9596328. 335 |
| M495T413   | 494. 7210762 | 413. 295 | 1334279. 814 |
| M495T567   | 494. 7236627 | 567. 1   | 2243045. 396 |
| M495T721   | 494. 7541022 | 720. 704 | 3951938. 853 |
| M495T82_1  | 494. 8020145 | 82. 0569 | 12546389. 4  |
| M495T82_2  | 494. 8135358 | 82. 0569 | 13178563. 07 |
| M495T656   | 495. 194919  | 655. 9   | 1408089. 259 |
| M495T395   | 495. 206364  | 395. 264 | 2862514. 245 |
| M495T743   | 495. 2393819 | 742. 68  | 58227774. 76 |
| M495T448   | 495. 2537882 | 447. 531 | 1298970. 636 |
| M495T702   | 495. 2590417 | 702. 055 | 4815050. 463 |
| M496T353   | 496. 2049314 | 352. 65  | 3407135. 712 |
| M496T798_1 | 496. 2222268 | 797. 773 | 87661270. 05 |
| M496T798_2 | 496. 2351847 | 797. 773 | 79486535. 26 |



|            |              |          |              |
|------------|--------------|----------|--------------|
| M496T743   | 496. 2422786 | 742. 68  | 9280931. 109 |
| M496T764   | 496. 2410603 | 763. 856 | 5465428. 568 |
| M496T836_1 | 496. 3269922 | 836. 034 | 11105678. 49 |
| M496T811_1 | 496. 3273983 | 811. 413 | 23455349. 43 |
| M496T739_1 | 496. 3281682 | 738. 697 | 53538861. 55 |
| M496T777   | 496. 3272422 | 777. 245 | 53522032. 51 |
| M496T827   | 496. 3270693 | 827. 271 | 16781842. 84 |
| M496T787   | 496. 3274626 | 786. 569 | 26088862. 23 |
| M496T802_1 | 496. 3276632 | 801. 685 | 25771499. 38 |
| M496T705   | 496. 3307935 | 704. 715 | 137940636. 2 |
| M496T669   | 496. 3335824 | 668. 867 | 31895174. 16 |
| M496T682_1 | 496. 3334963 | 681. 885 | 47219045. 69 |
| M496T754_1 | 496. 3348497 | 753. 987 | 198231749. 3 |
| M496T652   | 496. 3345729 | 651. 956 | 35715516. 13 |
| M496T785   | 496. 3413556 | 785. 136 | 74738904. 47 |
| M496T836_2 | 496. 3414122 | 836. 034 | 32491988. 17 |
| M496T574   | 496. 3414829 | 574. 363 | 5371252. 341 |
| M496T659   | 496. 3411521 | 658. 953 | 28895942. 57 |
| M496T792   | 496. 3413444 | 792. 146 | 58560068. 24 |
| M496T811_2 | 496. 3413149 | 811. 413 | 65356476. 97 |
| M496T692   | 496. 3415025 | 692. 461 | 45806642. 16 |
| M496T739_2 | 496. 3412937 | 738. 697 | 148477535. 4 |
| M496T719   | 496. 3412274 | 719. 215 | 156698961. 2 |
| M496T32    | 496. 3437182 | 32. 4171 | 3445290. 541 |
| M496T821   | 496. 3413735 | 821. 334 | 68331150. 62 |
| M496T802_2 | 496. 3413192 | 801. 685 | 63272143. 82 |
| M496T772   | 496. 3412304 | 772. 206 | 93991196. 27 |
| M496T682_2 | 496. 3439833 | 681. 885 | 36458117. 97 |
| M496T754_2 | 496. 3473811 | 753. 987 | 81935133. 22 |
| M496T703   | 496. 3412869 | 703. 35  | 87458530. 08 |
| M497T764   | 496. 7333416 | 763. 856 | 3239050. 717 |
| M497T75    | 496. 9029792 | 74. 9588 | 12614130. 63 |
| M497T117   | 497. 0767228 | 116. 689 | 4008283. 931 |
| M497T665_1 | 497. 1076053 | 664. 745 | 41365526. 72 |
| M497T716   | 497. 1073381 | 716. 403 | 3382842. 116 |
| M497T652_1 | 497. 1080919 | 651. 956 | 6112959. 314 |
| M497T677   | 497. 1078046 | 677. 376 | 4373330. 831 |
| M497T665_2 | 497. 1194282 | 664. 745 | 20288317. 45 |
| M497T620   | 497. 1459071 | 620. 172 | 20003278. 31 |
| M497T798_1 | 497. 2249223 | 797. 773 | 21673382. 02 |
| M497T468   | 497. 2388333 | 467. 706 | 3465667. 769 |
| M497T798_2 | 497. 2354384 | 797. 773 | 35214317. 19 |
| M497T746   | 497. 3340255 | 745. 603 | 13254274. 88 |
| M497T739   | 497. 3344147 | 738. 697 | 15171845. 17 |
| M497T813_1 | 497. 3344782 | 812. 862 | 8745561. 992 |
| M497T834   | 497. 3343567 | 834. 486 | 6327185. 826 |
| M497T731_1 | 497. 3345001 | 731. 347 | 21049030. 41 |
| M497T827_1 | 497. 3340536 | 827. 271 | 6291107. 747 |
| M497T758   | 497. 3344577 | 758. 236 | 15399261. 66 |
| M497T705   | 497. 3396034 | 704. 715 | 46004947. 97 |
| M497T660   | 497. 3395862 | 660. 455 | 8117043. 692 |
| M497T682   | 497. 3384517 | 681. 885 | 10643933. 72 |
| M497T796   | 497. 3398608 | 796. 474 | 23093883. 85 |
| M497T670   | 497. 3399633 | 670. 166 | 9865845. 402 |

|            |              |          |              |
|------------|--------------|----------|--------------|
| M497T652_2 | 497. 3395507 | 651. 956 | 9388682. 042 |
| M497T836   | 497. 3473396 | 836. 034 | 6331245. 872 |
| M497T813_2 | 497. 3469693 | 812. 862 | 17891505. 27 |
| M497T751   | 497. 3470274 | 751. 333 | 45577410. 35 |
| M497T731_2 | 497. 3471359 | 731. 347 | 38941942. 22 |
| M497T827_2 | 497. 3471743 | 827. 271 | 9047056. 051 |
| M497T772   | 497. 3443784 | 772. 206 | 54725432. 31 |
| M498T74    | 497. 9050943 | 73. 8324 | 7960614. 941 |
| M498T512_1 | 498. 2454762 | 511. 77  | 4030948. 661 |
| M498T502   | 498. 2453169 | 501. 549 | 1032655. 334 |
| M498T512_2 | 498. 2602673 | 511. 77  | 31720301. 76 |
| M498T518   | 498. 272934  | 517. 762 | 2183802. 169 |
| M498T708   | 498. 3867403 | 707. 557 | 4064280. 907 |
| M499T350   | 498. 7348351 | 349. 911 | 3442778. 821 |
| M499T487   | 498. 774701  | 486. 885 | 2245491. 521 |
| M499T297   | 499. 1204295 | 296. 739 | 6242513. 438 |
| M499T302   | 499. 1319944 | 302. 191 | 19843649. 23 |
| M499T183   | 499. 1294174 | 182. 574 | 7548888. 382 |
| M499T198   | 499. 1296207 | 198. 072 | 6166256. 276 |
| M499T212   | 499. 1295667 | 212. 448 | 3803780. 943 |
| M499T783   | 499. 1756832 | 782. 558 | 4499735. 853 |
| M499T743   | 499. 1916685 | 742. 68  | 156617570. 9 |
| M499T519   | 499. 2085883 | 519. 257 | 7699865. 973 |
| M499T158   | 499. 2101145 | 157. 773 | 5188314. 16  |
| M499T190   | 499. 2099651 | 189. 571 | 3465999. 807 |
| M499T87_1  | 499. 2187975 | 86. 6643 | 342792187. 6 |
| M499T87_2  | 499. 232435  | 86. 6643 | 113011958. 7 |
| M499T604   | 499. 2999009 | 603. 95  | 3751744. 935 |
| M499T824   | 499. 3238431 | 824. 311 | 1248279. 322 |
| M500T743   | 500. 1884957 | 742. 68  | 22156571. 18 |
| M500T97_1  | 500. 2050246 | 96. 7698 | 35130907. 66 |
| M500T90    | 500. 2046415 | 89. 6999 | 7293214. 847 |
| M500T351   | 500. 2108134 | 351. 348 | 5584401. 214 |
| M500T97_2  | 500. 2165791 | 96. 7698 | 16623215. 86 |
| M500T87    | 500. 2235299 | 86. 6643 | 71790345. 43 |
| M501T402_1 | 500. 8061195 | 401. 963 | 12242337. 84 |
| M501T537_1 | 501. 0957374 | 536. 761 | 1475190. 945 |
| M501T743   | 501. 204397  | 742. 68  | 2221830. 716 |
| M501T537_2 | 501. 2499477 | 536. 761 | 34822334. 7  |
| M501T703   | 501. 2441965 | 703. 35  | 10231374     |
| M501T598   | 501. 2564861 | 598. 125 | 6494510. 948 |
| M501T613   | 501. 2539629 | 612. 699 | 14340842. 36 |
| M501T402_2 | 501. 3062196 | 401. 963 | 4190224. 038 |
| M502T613   | 501. 751723  | 612. 699 | 7764093. 876 |
| M502T537   | 501. 7649905 | 536. 761 | 3463558. 604 |
| M502T93_1  | 502. 1694055 | 92. 7272 | 50415860. 01 |
| M502T93_2  | 502. 1800627 | 92. 7272 | 48577719. 56 |
| M502T32_1  | 502. 2840298 | 32. 4171 | 4103248. 319 |
| M502T832   | 502. 2908296 | 831. 709 | 3525279. 656 |
| M502T493   | 502. 2973242 | 492. 895 | 1732503. 935 |
| M502T32_2  | 502. 2973599 | 32. 4171 | 4024719. 397 |
| M503T721   | 502. 737637  | 720. 704 | 5146358. 818 |
| M503T84    | 502. 9092977 | 83. 5661 | 23659608. 53 |
| M503T121   | 503. 0482733 | 120. 525 | 9193063. 306 |

|            |              |          |              |
|------------|--------------|----------|--------------|
| M503T218   | 503. 1472072 | 217. 866 | 787993. 3982 |
| M503T500   | 503. 1844194 | 500. 045 | 3574693. 136 |
| M503T502   | 503. 1958978 | 501. 549 | 2777312. 19  |
| M503T98    | 503. 2034062 | 97. 7824 | 7087132. 668 |
| M503T719   | 503. 2439105 | 719. 215 | 4400567. 68  |
| M503T309   | 503. 251708  | 308. 967 | 2319699. 292 |
| M503T430   | 503. 2777273 | 430. 131 | 2057100. 629 |
| M503T32    | 503. 2890016 | 32. 4171 | 1456095. 553 |
| M503T617_1 | 503. 3319502 | 617. 133 | 21931149. 3  |
| M503T669_1 | 503. 3292872 | 668. 867 | 24089325. 06 |
| M503T595   | 503. 3317668 | 595. 066 | 70058183. 28 |
| M503T617_2 | 503. 3440079 | 617. 133 | 10389459. 65 |
| M503T669_2 | 503. 3399929 | 668. 867 | 23688313. 99 |
| M503T597   | 503. 3451626 | 596. 628 | 19506272. 04 |
| M504T239   | 504. 1807856 | 238. 605 | 12082228. 93 |
| M504T156   | 504. 1800462 | 156. 393 | 148542180. 3 |
| M504T263   | 504. 1830616 | 262. 529 | 27910717. 98 |
| M504T185_1 | 504. 1871969 | 185. 398 | 213297009. 3 |
| M504T223   | 504. 1832546 | 223. 474 | 17851738. 53 |
| M504T232   | 504. 1829709 | 231. 773 | 11732018. 36 |
| M504T293_1 | 504. 1872441 | 292. 623 | 207454448. 9 |
| M504T210_1 | 504. 1871961 | 210. 186 | 46805923. 85 |
| M504T87    | 504. 1871365 | 86. 6643 | 246175576    |
| M504T107_1 | 504. 1870798 | 106. 513 | 370980594. 1 |
| M504T309   | 504. 1974606 | 308. 967 | 16048171. 6  |
| M504T332   | 504. 1953768 | 332. 2   | 1827044. 492 |
| M504T163   | 504. 1952499 | 162. 728 | 100009136. 2 |
| M504T143   | 504. 1952191 | 142. 85  | 97589623. 08 |
| M504T185_2 | 504. 2005637 | 185. 398 | 106045506. 6 |
| M504T293_2 | 504. 2008016 | 292. 623 | 103057425. 6 |
| M504T210_2 | 504. 2003102 | 210. 186 | 24458084. 58 |
| M504T236   | 504. 1975032 | 235. 734 | 42407137. 42 |
| M504T107_2 | 504. 2004691 | 106. 513 | 186906630. 2 |
| M504T310   | 504. 2096141 | 310. 075 | 14749924. 38 |
| M504T334   | 504. 2068102 | 333. 715 | 6828617. 711 |
| M504T730   | 504. 2544693 | 729. 798 | 1008025. 99  |
| M504T440   | 504. 2621235 | 440. 459 | 2135257. 848 |
| M504T748   | 504. 31177   | 748. 486 | 5988754. 917 |
| M504T475   | 504. 3318377 | 475. 007 | 4912103. 441 |
| M504T595_1 | 504. 33469   | 595. 066 | 20958271. 22 |
| M504T595_2 | 504. 3462468 | 595. 066 | 10962230. 71 |
| M504T764   | 504. 3858004 | 763. 856 | 2302236. 648 |
| M505T82    | 504. 7619102 | 82. 0569 | 2304243. 323 |
| M505T84    | 504. 9125915 | 83. 5661 | 9073166. 69  |
| M505T97    | 505. 1610959 | 96. 7698 | 33342782. 6  |
| M505T721   | 505. 1722773 | 720. 704 | 1460981. 555 |
| M505T649_1 | 505. 1656667 | 649. 338 | 20931138. 48 |
| M505T143_1 | 505. 1736379 | 142. 85  | 8346799. 243 |
| M505T95    | 505. 1739136 | 94. 7467 | 145552403. 5 |
| M505T649_2 | 505. 1791205 | 649. 338 | 44559835. 41 |
| M505T161   | 505. 189785  | 161. 494 | 27505104. 02 |
| M505T185   | 505. 1897085 | 185. 398 | 38275096. 69 |
| M505T293_1 | 505. 1912008 | 292. 623 | 41490924. 33 |
| M505T143_2 | 505. 1884359 | 142. 85  | 21573737. 35 |

|            |             |         |             |
|------------|-------------|---------|-------------|
| M505T210_1 | 505.1897006 | 210.186 | 10126482.72 |
| M505T87_1  | 505.1886052 | 86.6643 | 43916497.79 |
| M505T107_1 | 505.1881888 | 106.513 | 75182673.37 |
| M505T309   | 505.2085414 | 308.967 | 2149040.79  |
| M505T163   | 505.2033051 | 162.728 | 12406109.54 |
| M505T293_2 | 505.2022517 | 292.623 | 33111310.4  |
| M505T181   | 505.2032532 | 181.154 | 14585342.1  |
| M505T188   | 505.2033239 | 188.126 | 17873578.29 |
| M505T143_3 | 505.1992194 | 142.85  | 20193492.26 |
| M505T210_2 | 505.2034357 | 210.186 | 8935382.308 |
| M505T87_2  | 505.2004041 | 86.6643 | 25294298.67 |
| M505T107_2 | 505.2036743 | 106.513 | 47723480.15 |
| M505T597   | 505.342396  | 596.628 | 2937218.272 |
| M505T598   | 505.3566361 | 598.125 | 2600328.762 |
| M506T703   | 505.7741171 | 703.35  | 9342149.463 |
| M506T168   | 506.1071579 | 167.804 | 4299973.477 |
| M506T226   | 506.1361818 | 226.202 | 25614534.03 |
| M506T298   | 506.1363501 | 298.135 | 11276486.26 |
| M506T371   | 506.1637252 | 370.777 | 3750844.249 |
| M506T384   | 506.1632102 | 383.536 | 3308611.388 |
| M506T96    | 506.1763096 | 95.7572 | 23904112.42 |
| M506T649   | 506.1793295 | 649.338 | 11580425.9  |
| M506T258   | 506.1798818 | 258.489 | 16337826.81 |
| M506T218_1 | 506.180613  | 217.866 | 17781647.03 |
| M506T293   | 506.1927247 | 292.623 | 8342031.959 |
| M506T108   | 506.1955705 | 107.537 | 7162774.292 |
| M506T218_2 | 506.1927518 | 217.866 | 8245703.078 |
| M506T485   | 506.2549542 | 485.471 | 1287064.276 |
| M506T783_1 | 506.2686189 | 782.558 | 5435351.463 |
| M506T702   | 506.2759438 | 702.055 | 6416515.084 |
| M506T783_2 | 506.2794189 | 782.558 | 4212777.46  |
| M507T229   | 506.6374861 | 229.059 | 10464050.29 |
| M507T241   | 506.6441586 | 241.368 | 1630761.184 |
| M507T545_1 | 506.7579055 | 545.203 | 27055798.62 |
| M507T199_1 | 507.1409381 | 199.43  | 5801210.953 |
| M507T232   | 507.1523533 | 231.773 | 29412246.43 |
| M507T190_1 | 507.1530371 | 189.571 | 50428414.43 |
| M507T199_2 | 507.1531721 | 199.43  | 36005237.88 |
| M507T181   | 507.1529965 | 181.154 | 18625048.96 |
| M507T190_2 | 507.1674605 | 189.571 | 13551481.75 |
| M507T199_3 | 507.1668595 | 199.43  | 7864669.693 |
| M507T218   | 507.1921588 | 217.866 | 4210470.459 |
| M507T393   | 507.2132818 | 392.715 | 4919283.238 |
| M507T545_2 | 507.2571365 | 545.203 | 13868551.72 |
| M507T783   | 507.2722333 | 782.558 | 1091095.935 |
| M508T183   | 507.6543487 | 182.574 | 13761664.35 |
| M508T190_1 | 507.6542964 | 189.571 | 24600644.3  |
| M508T199_1 | 507.6543892 | 199.43  | 15782412.17 |
| M508T232   | 507.6492514 | 231.773 | 9170731.554 |
| M508T297   | 508.1046741 | 296.739 | 1972983.629 |
| M508T190_2 | 508.1528556 | 189.571 | 15063007.48 |
| M508T199_2 | 508.1526107 | 199.43  | 9477807.795 |
| M508T181   | 508.1527945 | 181.154 | 4673601.456 |
| M508T144   | 508.2078451 | 143.959 | 8993939.58  |

|            |             |         |             |
|------------|-------------|---------|-------------|
| M508T167   | 508.2073968 | 166.613 | 9982731.009 |
| M508T127   | 508.2105901 | 126.785 | 7013178.791 |
| M508T108   | 508.2105599 | 107.537 | 9441317.818 |
| M508T318   | 508.215904  | 318.497 | 6831989.534 |
| M508T775_1 | 508.2460355 | 774.919 | 46330479.1  |
| M508T698   | 508.2487633 | 697.952 | 4295243.242 |
| M508T445   | 508.2483785 | 444.725 | 624564.6038 |
| M508T775_2 | 508.259609  | 774.919 | 38515242.67 |
| M508T810_1 | 508.3710704 | 810.052 | 126089635.2 |
| M508T32    | 508.379588  | 32.4171 | 1463656.415 |
| M508T810_2 | 508.3819852 | 810.052 | 50105304.91 |
| M509T188   | 508.6517452 | 188.126 | 8804256.608 |
| M509T522   | 508.7514431 | 522.177 | 2078332.467 |
| M509T163   | 509.1437101 | 162.728 | 64321377.04 |
| M509T293_1 | 509.1451334 | 292.623 | 109181102   |
| M509T180   | 509.1439329 | 179.75  | 41994733.88 |
| M509T648   | 509.1437849 | 648.026 | 2561396.873 |
| M509T108   | 509.1437433 | 107.537 | 121196816.1 |
| M509T143   | 509.1435092 | 142.85  | 42127053.88 |
| M509T190   | 509.1501269 | 189.571 | 28816523.61 |
| M509T293_2 | 509.1560186 | 292.623 | 60933915.9  |
| M509T384   | 509.2214629 | 383.536 | 6613709.675 |
| M509T775   | 509.2526266 | 774.919 | 18722801.57 |
| M509T811   | 509.3739775 | 811.413 | 22550880.49 |
| M509T826   | 509.3741518 | 825.74  | 12660614.82 |
| M510T163   | 510.1489938 | 162.728 | 17582664.09 |
| M510T293   | 510.149107  | 292.623 | 22176747.02 |
| M510T143   | 510.148927  | 142.85  | 7156802.938 |
| M510T107   | 510.1530895 | 106.513 | 23879780.58 |
| M510T775   | 510.2557943 | 774.919 | 3664345.413 |
| M510T626   | 510.3375274 | 626.042 | 1167918.507 |
| M510T810   | 510.3439965 | 810.052 | 7883359.662 |
| M510T824   | 510.3439065 | 824.311 | 3683121.246 |
| M510T838   | 510.3446521 | 837.524 | 1956367.651 |
| M510T800   | 510.344712  | 800.484 | 20586962.05 |
| M510T792   | 510.3441565 | 792.146 | 25514778.34 |
| M510T783   | 510.3512253 | 782.558 | 174960233.4 |
| M510T741_1 | 510.3584439 | 741.302 | 12714853.06 |
| M510T741_2 | 510.369928  | 741.302 | 11258817.09 |
| M510T827   | 510.3827298 | 827.271 | 18149215.81 |
| M510T826   | 510.3954268 | 825.74  | 24922524.08 |
| M511T82_1  | 510.774089  | 82.0569 | 25808280.19 |
| M511T82_2  | 510.7874619 | 82.0569 | 34963565.9  |
| M511T318   | 511.0885915 | 318.497 | 3675835.213 |
| M511T293   | 511.1475715 | 292.623 | 3333710.441 |
| M511T519   | 511.181851  | 519.257 | 19575721.33 |
| M511T772   | 511.2279466 | 772.206 | 6636264.817 |
| M511T703   | 511.2409656 | 703.35  | 5437555.14  |
| M511T695   | 511.2410389 | 695.155 | 9890019.615 |
| M511T608   | 511.2861004 | 608.261 | 7786188.113 |
| M511T652   | 511.3366114 | 651.956 | 1984751.481 |
| M511T792   | 511.330577  | 792.146 | 22440403.3  |
| M511T791   | 511.3464201 | 790.802 | 43966931.27 |
| M511T784   | 511.3572771 | 783.78  | 78330071.98 |

|            |              |          |              |
|------------|--------------|----------|--------------|
| M511T800   | 511. 3763897 | 800. 484 | 9206541. 649 |
| M512T480   | 511. 7769152 | 479. 527 | 555159. 949  |
| M512T119   | 512. 0431642 | 119. 433 | 6253682. 99  |
| M512T519   | 512. 1749959 | 519. 257 | 4423950. 473 |
| M512T393   | 512. 1738711 | 392. 715 | 3127624. 709 |
| M512T350   | 512. 206613  | 349. 911 | 793049. 9757 |
| M512T798   | 512. 2604585 | 797. 773 | 3397656. 992 |
| M512T610   | 512. 2970653 | 609. 592 | 1543150. 626 |
| M512T792   | 512. 3376111 | 792. 146 | 11180241. 57 |
| M512T783   | 512. 3592899 | 782. 558 | 8963083. 49  |
| M513T436_1 | 512. 6265542 | 436. 069 | 2620809. 187 |
| M513T690   | 512. 7557463 | 689. 5   | 4328109. 241 |
| M513T82    | 512. 774807  | 82. 0569 | 14036025. 96 |
| M513T436_2 | 512. 9521113 | 436. 069 | 2290637. 959 |
| M513T121   | 513. 050322  | 120. 525 | 7876476. 873 |
| M513T475   | 513. 1935307 | 475. 007 | 1290322. 044 |
| M513T776_1 | 513. 2060579 | 776. 194 | 153099114. 7 |
| M513T388   | 513. 2157107 | 387. 763 | 2917138. 082 |
| M513T776_2 | 513. 2200492 | 776. 194 | 20648923. 16 |
| M514T703_1 | 513. 7674275 | 703. 35  | 76437490. 14 |
| M514T422_1 | 513. 7682819 | 421. 784 | 6653793. 735 |
| M514T228   | 514. 1211602 | 227. 633 | 8314873. 986 |
| M514T305   | 514. 2081158 | 304. 777 | 14361516. 72 |
| M514T776   | 514. 2149116 | 776. 194 | 36827744. 77 |
| M514T680   | 514. 2399246 | 680. 402 | 2183663. 106 |
| M514T430   | 514. 246405  | 430. 131 | 850115. 3358 |
| M514T703_2 | 514. 2674087 | 703. 35  | 39988058. 51 |
| M514T422_2 | 514. 2730568 | 421. 784 | 1856747. 719 |
| M515T703_1 | 514. 7711877 | 703. 35  | 14787643. 02 |
| M515T113   | 515. 0868325 | 112. 781 | 3216620. 313 |
| M515T147   | 515. 1325908 | 146. 742 | 29823538. 2  |
| M515T190_1 | 515. 1396676 | 189. 571 | 347882928. 7 |
| M515T180_1 | 515. 1398561 | 179. 75  | 148754696. 1 |
| M515T199_1 | 515. 1397733 | 199. 43  | 217186245. 2 |
| M515T94    | 515. 1340472 | 93. 7378 | 3072737. 339 |
| M515T232_1 | 515. 1397208 | 231. 773 | 231189879. 5 |
| M515T163   | 515. 1478107 | 162. 728 | 22768930. 37 |
| M515T190_2 | 515. 1521411 | 189. 571 | 167978676. 5 |
| M515T180_2 | 515. 151751  | 179. 75  | 67488988. 12 |
| M515T199_2 | 515. 1542093 | 199. 43  | 100209578. 5 |
| M515T110   | 515. 1480497 | 110. 047 | 19090168. 24 |
| M515T232_2 | 515. 1535708 | 231. 773 | 108667287. 6 |
| M515T148   | 515. 1491383 | 148. 117 | 32332437. 37 |
| M515T743_1 | 515. 1574399 | 742. 68  | 10085624. 39 |
| M515T743_2 | 515. 1730466 | 742. 68  | 14186183. 65 |
| M515T703_2 | 515. 1838877 | 703. 35  | 20856032. 15 |
| M515T695_1 | 515. 184022  | 695. 155 | 37224540. 05 |
| M515T507   | 515. 1863542 | 507. 343 | 10555730. 37 |
| M515T703_3 | 515. 1949887 | 703. 35  | 9930997. 251 |
| M515T695_2 | 515. 1959746 | 695. 155 | 17666334. 54 |
| M515T451   | 515. 2122028 | 450. 503 | 758712. 556  |
| M515T776   | 515. 2115979 | 776. 194 | 6407337. 423 |
| M515T727   | 515. 2254599 | 726. 707 | 9655409. 544 |
| M515T821   | 515. 2242211 | 821. 334 | 48069890. 73 |

|            |              |          |              |
|------------|--------------|----------|--------------|
| M515T803   | 515. 223996  | 802. 88  | 7879461. 439 |
| M515T743_3 | 515. 2589045 | 742. 68  | 4120139. 634 |
| M515T706   | 515. 2701986 | 706. 229 | 1562509. 395 |
| M515T619   | 515. 2783694 | 618. 683 | 6506913. 8   |
| M515T631   | 515. 2851377 | 630. 507 | 7059914. 377 |
| M516T190_1 | 515. 6332779 | 189. 571 | 34649636. 63 |
| M516T199_1 | 515. 6328229 | 199. 43  | 20585685. 51 |
| M516T232_1 | 515. 641813  | 231. 773 | 96155377. 76 |
| M516T190_2 | 515. 6445657 | 189. 571 | 162935849. 3 |
| M516T199_2 | 515. 6446383 | 199. 43  | 91601703. 74 |
| M516T181   | 515. 6447185 | 181. 154 | 69682402. 73 |
| M516T230   | 515. 6556195 | 230. 321 | 24295547. 15 |
| M516T463   | 515. 7782742 | 463. 271 | 2527975. 084 |
| M516T369   | 516. 1279113 | 369. 321 | 1804596. 156 |
| M516T190_3 | 516. 1419235 | 189. 571 | 99019320. 21 |
| M516T232_2 | 516. 1419069 | 231. 773 | 32491699. 43 |
| M516T106   | 516. 1502368 | 105. 503 | 11604752. 06 |
| M516T299   | 516. 1501039 | 299. 493 | 2465420. 291 |
| M516T743   | 516. 1752293 | 742. 68  | 4665099. 357 |
| M516T507   | 516. 1863817 | 507. 343 | 2455372. 118 |
| M516T345   | 516. 201699  | 344. 555 | 4240728. 835 |
| M516T248   | 516. 2222201 | 247. 692 | 10202798. 38 |
| M516T821   | 516. 2229201 | 821. 334 | 10181841. 41 |
| M517T190_1 | 516. 6500175 | 189. 571 | 15280764. 17 |
| M517T181   | 516. 6495665 | 181. 154 | 4383826. 496 |
| M517T201   | 516. 6494113 | 200. 766 | 7583693. 394 |
| M517T190_2 | 517. 135851  | 189. 571 | 5280842. 142 |
| M517T199_1 | 517. 1359001 | 199. 43  | 3433242. 701 |
| M517T232   | 517. 1444661 | 231. 773 | 2615251. 291 |
| M517T199_2 | 517. 1501978 | 199. 43  | 1717022. 167 |
| M517T500   | 517. 2222061 | 500. 045 | 2532968. 862 |
| M517T739   | 517. 2390162 | 738. 697 | 2644366. 603 |
| M517T623   | 517. 3130509 | 623. 11  | 38136336. 42 |
| M517T604_1 | 517. 3127823 | 603. 95  | 101631706    |
| M517T679_1 | 517. 3115784 | 678. 909 | 34424461. 19 |
| M517T604_2 | 517. 3239365 | 603. 95  | 41854903. 22 |
| M517T679_2 | 517. 3239863 | 678. 909 | 14156680. 29 |
| M518T816_1 | 518. 311565  | 815. 517 | 22367496. 23 |
| M518T604   | 518. 3199189 | 603. 95  | 30252740. 05 |
| M518T679   | 518. 3127162 | 678. 909 | 10768495. 46 |
| M518T806   | 518. 3244095 | 805. 823 | 8790795. 838 |
| M518T816_2 | 518. 324384  | 815. 517 | 51023028. 93 |
| M519T565   | 518. 7577266 | 564. 534 | 3383846. 654 |
| M519T669   | 519. 2783395 | 668. 867 | 903498. 9702 |
| M519T734   | 519. 2809101 | 734. 269 | 7203382. 23  |
| M519T604_1 | 519. 3140657 | 603. 95  | 3598598. 954 |
| M519T816   | 519. 3232549 | 815. 517 | 13661012. 87 |
| M519T604_2 | 519. 32602   | 603. 95  | 4158994. 875 |
| M519T594   | 519. 3327098 | 593. 62  | 652506. 664  |
| M520T734_1 | 519. 7701916 | 734. 269 | 4083480. 217 |
| M520T734_2 | 519. 7835503 | 734. 269 | 3969685. 423 |
| M520T393_1 | 520. 1646657 | 392. 715 | 9364687. 7   |
| M520T328   | 520. 1659528 | 328. 106 | 903248. 4709 |
| M520T393_2 | 520. 1763151 | 392. 715 | 5181863. 467 |

|            |              |          |              |
|------------|--------------|----------|--------------|
| M520T101   | 520. 188096  | 101. 161 | 12009933. 29 |
| M520T95    | 520. 1882892 | 94. 7467 | 9577404. 569 |
| M520T31    | 520. 3266996 | 31. 4047 | 15351103. 22 |
| M520T485_1 | 520. 3264362 | 485. 471 | 4197426. 947 |
| M520T838_1 | 520. 3363009 | 837. 524 | 127559243. 5 |
| M520T761   | 520. 3361174 | 760. 916 | 9397796. 783 |
| M520T485_2 | 520. 33769   | 485. 471 | 3393932. 336 |
| M520T32_1  | 520. 3407359 | 32. 4171 | 74347074. 02 |
| M520T838_2 | 520. 3504609 | 837. 524 | 7102278. 265 |
| M520T32_2  | 520. 3528723 | 32. 4171 | 5667451. 361 |
| M521T442   | 521. 2025723 | 442. 005 | 2741326. 336 |
| M521T703   | 521. 2589412 | 703. 35  | 2579401. 231 |
| M521T381   | 521. 3297007 | 380. 63  | 8503845. 83  |
| M521T32_1  | 521. 3326917 | 32. 4171 | 8117385. 514 |
| M521T669_1 | 521. 3409148 | 668. 867 | 29647743. 58 |
| M521T838_1 | 521. 3381863 | 837. 524 | 29031756. 55 |
| M521T617_1 | 521. 3437125 | 617. 133 | 25700769. 45 |
| M521T32_2  | 521. 3467743 | 32. 4171 | 14787761. 98 |
| M521T595_1 | 521. 3436821 | 595. 066 | 69412812. 74 |
| M521T669_2 | 521. 3557481 | 668. 867 | 7003811. 872 |
| M521T733   | 521. 3502392 | 732. 773 | 1771100. 717 |
| M521T838_2 | 521. 3506169 | 837. 524 | 4188697. 684 |
| M521T617_2 | 521. 3550075 | 617. 133 | 8408336. 731 |
| M521T595_2 | 521. 3554646 | 595. 066 | 23687046. 68 |
| M522T703_1 | 521. 7475939 | 703. 35  | 18000549. 53 |
| M522T703_2 | 521. 7591428 | 703. 35  | 20149438. 1  |
| M522T190   | 522. 1278132 | 189. 571 | 6403208. 229 |
| M522T232   | 522. 1292039 | 231. 773 | 3679996. 198 |
| M522T201   | 522. 1277658 | 200. 766 | 3337010. 583 |
| M522T118_1 | 522. 1870878 | 118. 116 | 99508298. 81 |
| M522T649   | 522. 1970078 | 649. 338 | 5188362. 042 |
| M522T143_1 | 522. 1920298 | 142. 85  | 56474177. 17 |
| M522T99_1  | 522. 2000634 | 98. 9918 | 234399357. 2 |
| M522T118_2 | 522. 2001698 | 118. 116 | 343003290    |
| M522T456_1 | 522. 2092135 | 456. 126 | 4983178. 563 |
| M522T158   | 522. 2056115 | 157. 773 | 25296275. 83 |
| M522T143_2 | 522. 2057663 | 142. 85  | 36862299. 26 |
| M522T99_2  | 522. 2169701 | 98. 9918 | 30057361. 03 |
| M522T135   | 522. 215737  | 134. 574 | 20698122. 62 |
| M522T295   | 522. 2197683 | 295. 356 | 4328747. 971 |
| M522T118_3 | 522. 2143166 | 118. 116 | 77438127. 34 |
| M522T456_2 | 522. 2226207 | 456. 126 | 5649229. 499 |
| M522T503   | 522. 2540481 | 503. 046 | 5091838. 75  |
| M522T743_1 | 522. 2622768 | 742. 68  | 42405749. 7  |
| M522T405   | 522. 2589346 | 404. 872 | 5287304. 134 |
| M522T703_3 | 522. 2597083 | 703. 35  | 10766255. 21 |
| M522T743_2 | 522. 2735946 | 742. 68  | 40875347. 44 |
| M522T381   | 522. 3331063 | 380. 63  | 2478296. 989 |
| M522T617_1 | 522. 345861  | 617. 133 | 16676803. 44 |
| M522T838   | 522. 3455609 | 837. 524 | 8666391. 17  |
| M522T784_1 | 522. 3433103 | 783. 78  | 19577527. 63 |
| M522T799   | 522. 3438981 | 799. 089 | 25163463. 42 |
| M522T776   | 522. 34364   | 776. 194 | 21476326. 27 |
| M522T823_1 | 522. 3434953 | 822. 881 | 9382290. 272 |



|            |              |          |              |
|------------|--------------|----------|--------------|
| M522T657   | 522. 3529638 | 657. 451 | 150720275. 1 |
| M522T703_4 | 522. 3528987 | 703. 35  | 81448669. 31 |
| M522T595   | 522. 3496634 | 595. 066 | 26307716. 52 |
| M522T744   | 522. 3529309 | 744. 182 | 464003500. 8 |
| M522T617_2 | 522. 3571998 | 617. 133 | 17244742. 74 |
| M522T813   | 522. 3571539 | 812. 862 | 24255557. 78 |
| M522T833   | 522. 3622315 | 833. 029 | 4593837. 686 |
| M522T784_2 | 522. 3572497 | 783. 78  | 50676599. 96 |
| M522T715   | 522. 3570173 | 715. 011 | 84764584. 85 |
| M522T802   | 522. 3626249 | 801. 685 | 11881205. 04 |
| M522T795   | 522. 3627061 | 795. 165 | 19754741. 44 |
| M522T823_2 | 522. 3629401 | 822. 881 | 9902191. 05  |
| M522T761   | 522. 3638349 | 760. 916 | 38824349. 04 |
| M523T190_1 | 522. 6301404 | 189. 571 | 5605508. 102 |
| M523T199_1 | 522. 6303275 | 199. 43  | 3722053. 372 |
| M523T703_1 | 522. 7520406 | 703. 35  | 22446487. 82 |
| M523T190_2 | 523. 1235343 | 189. 571 | 84328251. 49 |
| M523T180   | 523. 1237436 | 179. 75  | 34358806. 37 |
| M523T199_2 | 523. 1236704 | 199. 43  | 51008095. 45 |
| M523T110   | 523. 1264491 | 110. 047 | 10274074. 48 |
| M523T232   | 523. 1264086 | 231. 773 | 62712242. 13 |
| M523T190_3 | 523. 1348808 | 189. 571 | 74469509. 19 |
| M523T199_3 | 523. 1350191 | 199. 43  | 42336888. 4  |
| M523T181   | 523. 1350942 | 181. 154 | 28757727. 33 |
| M523T95    | 523. 1858179 | 94. 7467 | 16560193. 32 |
| M523T811   | 523. 1917006 | 811. 413 | 35621188. 03 |
| M523T144   | 523. 2058071 | 143. 959 | 9030151. 081 |
| M523T99    | 523. 2027994 | 98. 9918 | 45184136. 15 |
| M523T118   | 523. 2029898 | 118. 116 | 67684036. 16 |
| M523T371   | 523. 2206901 | 370. 777 | 571242. 4699 |
| M523T703_2 | 523. 2603549 | 703. 35  | 9374859. 488 |
| M523T743   | 523. 2655459 | 742. 68  | 12367299. 51 |
| M523T777   | 523. 3495375 | 777. 245 | 13938305. 38 |
| M523T595   | 523. 3504421 | 595. 066 | 4590434. 747 |
| M523T823_1 | 523. 3510018 | 822. 881 | 5745813. 611 |
| M523T728   | 523. 3536621 | 728. 25  | 29218170. 89 |
| M523T762   | 523. 3606948 | 762. 439 | 27163582. 99 |
| M523T703_3 | 523. 3606269 | 703. 35  | 39737497. 2  |
| M523T659   | 523. 3608234 | 658. 953 | 8975616. 243 |
| M523T798   | 523. 3630903 | 797. 773 | 11265972. 98 |
| M523T823_2 | 523. 3629472 | 822. 881 | 5173735. 463 |
| M524T190_1 | 523. 6231713 | 189. 571 | 27170891. 3  |
| M524T199_1 | 523. 6261749 | 199. 43  | 28541431. 5  |
| M524T181_1 | 523. 6261485 | 181. 154 | 16796232. 19 |
| M524T110   | 523. 626979  | 110. 047 | 3553987. 514 |
| M524T232_1 | 523. 6345811 | 231. 773 | 21374954. 7  |
| M524T190_2 | 523. 6359545 | 189. 571 | 40936960. 19 |
| M524T199_2 | 523. 6393864 | 199. 43  | 9027503. 648 |
| M524T703   | 523. 7571005 | 703. 35  | 6419674. 436 |
| M524T232_2 | 524. 1236738 | 231. 773 | 10750966. 51 |
| M524T181_2 | 524. 1292756 | 181. 154 | 6124929. 731 |
| M524T199_3 | 524. 129421  | 199. 43  | 16623373. 67 |
| M524T188   | 524. 1292135 | 188. 126 | 27287115. 59 |
| M524T118_1 | 524. 1532794 | 118. 116 | 39099579. 44 |

|            |              |          |              |
|------------|--------------|----------|--------------|
| M524T218   | 524. 1905619 | 217. 866 | 4146585. 18  |
| M524T101   | 524. 205962  | 101. 161 | 6621514. 233 |
| M524T118_2 | 524. 2026957 | 118. 116 | 14579911. 8  |
| M524T254   | 524. 205962  | 254. 446 | 2560128. 478 |
| M524T314   | 524. 2092189 | 314. 259 | 2602695. 973 |
| M524T202   | 524. 2117176 | 202. 149 | 8087346. 215 |
| M524T554   | 524. 245375  | 553. 936 | 2494077. 566 |
| M524T823_1 | 524. 3557    | 822. 881 | 317811502    |
| M524T32_1  | 524. 3599813 | 32. 4171 | 7976177. 612 |
| M524T789   | 524. 3672867 | 789. 293 | 154399609. 5 |
| M524T702   | 524. 3718207 | 702. 055 | 12485619. 61 |
| M524T762   | 524. 3680697 | 762. 439 | 47883145. 95 |
| M524T753   | 524. 3715896 | 752. 541 | 32710110. 35 |
| M524T744   | 524. 3681696 | 744. 182 | 39838609. 39 |
| M524T823_2 | 524. 3670816 | 822. 881 | 2068812707   |
| M524T722   | 524. 3678034 | 722. 193 | 23108093. 13 |
| M524T32_2  | 524. 374189  | 32. 4171 | 16966788. 03 |
| M524T773   | 524. 3734191 | 773. 437 | 41536837. 5  |
| M524T823_3 | 524. 3827332 | 822. 881 | 177766517. 7 |
| M525T180   | 524. 6359825 | 179. 75  | 1679157. 61  |
| M525T199_1 | 524. 6357378 | 199. 43  | 4053451. 174 |
| M525T188   | 524. 6359187 | 188. 126 | 6871932. 514 |
| M525T119_1 | 524. 6476534 | 119. 433 | 15727826. 36 |
| M525T108   | 525. 1130671 | 107. 537 | 20832177. 09 |
| M525T184   | 525. 1178488 | 183. 886 | 7484379. 076 |
| M525T163   | 525. 1176958 | 162. 728 | 9923820. 872 |
| M525T230   | 525. 1263966 | 230. 321 | 1323782. 782 |
| M525T293   | 525. 1240449 | 292. 623 | 11387817. 41 |
| M525T199_2 | 525. 1263556 | 199. 43  | 1774899. 904 |
| M525T107   | 525. 1250102 | 106. 513 | 35435611. 91 |
| M525T190   | 525. 1350271 | 189. 571 | 967919. 654  |
| M525T119_2 | 525. 149173  | 119. 433 | 4925702. 404 |
| M525T811   | 525. 1978583 | 811. 413 | 1758405. 513 |
| M525T218   | 525. 1977808 | 217. 866 | 1023137. 017 |
| M525T338   | 525. 2176918 | 337. 767 | 2166177. 25  |
| M525T513   | 525. 2271748 | 513. 285 | 1705434. 561 |
| M525T583   | 525. 2691225 | 583. 068 | 734806. 7526 |
| M525T485   | 525. 2835064 | 485. 471 | 3390015. 093 |
| M525T823_1 | 525. 3706226 | 822. 881 | 548742735. 3 |
| M525T32    | 525. 3777976 | 32. 4171 | 4768045. 708 |
| M525T823_2 | 525. 382041  | 822. 881 | 264156182. 6 |
| M526T372   | 526. 2039417 | 372. 152 | 5099025. 997 |
| M526T698   | 526. 2781606 | 697. 952 | 7603157. 639 |
| M526T823   | 526. 3727458 | 822. 881 | 96457457. 54 |
| M527T82    | 526. 7479571 | 82. 0569 | 55489832. 1  |
| M527T698   | 526. 7823471 | 697. 952 | 4650528. 71  |
| M527T412   | 526. 8596562 | 411. 838 | 982723. 047  |
| M527T519_1 | 527. 1463924 | 519. 257 | 3101268. 38  |
| M527T163   | 527. 1525013 | 162. 728 | 12921199. 57 |
| M527T616   | 527. 1520679 | 615. 594 | 2497695. 061 |
| M527T291   | 527. 1525011 | 291. 307 | 7229750. 355 |
| M527T143_1 | 527. 1524666 | 142. 85  | 45272343. 38 |
| M527T118_1 | 527. 1524923 | 118. 116 | 243593981. 7 |
| M527T519_2 | 527. 1579689 | 519. 257 | 1931829. 653 |

|            |              |          |              |
|------------|--------------|----------|--------------|
| M527T649_1 | 527. 1552439 | 649. 338 | 3337258. 409 |
| M527T164   | 527. 1678528 | 163. 846 | 4326634. 705 |
| M527T143_2 | 527. 1681391 | 142. 85  | 14811601. 55 |
| M527T118_2 | 527. 1701823 | 118. 116 | 73135321. 92 |
| M527T639   | 527. 2241505 | 639. 219 | 6487356. 872 |
| M527T649_2 | 527. 2241009 | 649. 338 | 4130516. 314 |
| M527T771   | 527. 2283781 | 771. 042 | 21440326. 03 |
| M527T708_1 | 527. 242247  | 707. 557 | 9658831. 321 |
| M527T715   | 527. 2426406 | 715. 011 | 8644599. 529 |
| M527T708_2 | 527. 2570714 | 707. 557 | 6470922. 499 |
| M527T716   | 527. 25661   | 716. 403 | 4989562. 806 |
| M527T683   | 527. 3664548 | 683. 436 | 8848467. 393 |
| M527T823   | 527. 376203  | 822. 881 | 13080723. 71 |
| M528T82    | 527. 7709092 | 82. 0569 | 1489072. 496 |
| M528T168   | 528. 0401066 | 167. 804 | 5879310. 889 |
| M528T119   | 528. 1582744 | 119. 433 | 53890279. 92 |
| M528T103   | 528. 1582221 | 103. 423 | 21889805. 12 |
| M528T135   | 528. 1581494 | 134. 574 | 14881627. 53 |
| M528T143   | 528. 1580757 | 142. 85  | 10951738. 93 |
| M528T771_1 | 528. 2239317 | 771. 042 | 4619920. 497 |
| M528T656   | 528. 2359171 | 655. 9   | 3881195. 169 |
| M528T771_2 | 528. 2351397 | 771. 042 | 3776242. 762 |
| M529T416   | 528. 6185362 | 416. 239 | 1769694. 896 |
| M529T733   | 528. 7709583 | 732. 773 | 964107. 5193 |
| M529T472   | 528. 9329048 | 472. 132 | 3085991. 831 |
| M529T415   | 528. 9540181 | 414. 82  | 842208. 1083 |
| M529T620_1 | 529. 0777289 | 620. 172 | 3322330. 591 |
| M529T620_2 | 529. 0892648 | 620. 172 | 2431505. 858 |
| M529T119   | 529. 1654028 | 119. 433 | 9101215. 854 |
| M529T685   | 529. 1726322 | 684. 985 | 4115154. 422 |
| M529T776   | 529. 1871641 | 776. 194 | 11948197. 59 |
| M529T381   | 529. 1985918 | 380. 63  | 10505528. 05 |
| M529T768   | 529. 2393669 | 768. 166 | 14877826. 88 |
| M529T310   | 529. 240356  | 310. 075 | 499403. 8322 |
| M529T670   | 529. 2419362 | 670. 166 | 3551268. 359 |
| M529T737   | 529. 2417942 | 737. 198 | 16548766. 61 |
| M529T655   | 529. 2418709 | 654. 542 | 3240710. 895 |
| M529T555   | 529. 2500519 | 555. 358 | 5369622. 826 |
| M529T628   | 529. 2506754 | 627. 58  | 3411415. 12  |
| M529T741   | 529. 3748781 | 741. 302 | 2881185. 868 |
| M529T800   | 529. 3862362 | 800. 484 | 2329187. 089 |
| M530T161   | 530. 1293659 | 161. 494 | 27147866. 14 |
| M530T775   | 530. 1816363 | 774. 919 | 3160985. 505 |
| M530T106   | 530. 2030925 | 105. 503 | 8533423. 687 |
| M530T381   | 530. 2010948 | 380. 63  | 2364381. 463 |
| M530T482   | 530. 2203899 | 482. 436 | 450375. 6582 |
| M530T413   | 530. 2451176 | 413. 295 | 2395394. 708 |
| M530T389   | 530. 2858093 | 389. 035 | 2806290. 953 |
| M531T163   | 530. 6271559 | 162. 728 | 5994250. 497 |
| M531T113   | 531. 0574914 | 112. 781 | 5720850. 92  |
| M531T293   | 531. 0751745 | 292. 623 | 14383020. 51 |
| M531T190   | 531. 0865401 | 189. 571 | 11570688. 27 |
| M531T210   | 531. 0854471 | 210. 186 | 7120499. 922 |
| M531T237   | 531. 0861384 | 237. 171 | 13770241. 22 |

|            |              |          |              |
|------------|--------------|----------|--------------|
| M531T802   | 531. 2249722 | 801. 685 | 69728785. 43 |
| M531T516   | 531. 2453959 | 516. 214 | 1801721. 474 |
| M531T780_1 | 531. 2497314 | 780. 043 | 9413185. 934 |
| M531T780_2 | 531. 262702  | 780. 043 | 11667209. 06 |
| M531T519   | 531. 2956261 | 519. 257 | 2142074. 873 |
| M531T649_1 | 531. 3641799 | 649. 338 | 9681516. 262 |
| M531T772   | 531. 373101  | 772. 206 | 2711251. 742 |
| M531T649_2 | 531. 3751418 | 649. 338 | 4597034. 901 |
| M532T482_1 | 531. 7942905 | 482. 436 | 4653717. 406 |
| M532T482_2 | 531. 8059225 | 482. 436 | 3497661. 258 |
| M532T119   | 532. 1317481 | 119. 433 | 11563331. 87 |
| M532T302   | 532. 1639381 | 302. 191 | 1793348. 412 |
| M532T158   | 532. 2172397 | 157. 773 | 7751380. 511 |
| M532T181   | 532. 2173652 | 181. 154 | 17491999. 67 |
| M532T291   | 532. 2221615 | 291. 307 | 22793777. 01 |
| M532T143   | 532. 2220713 | 142. 85  | 20617618. 92 |
| M532T104   | 532. 2220146 | 104. 493 | 60884566. 69 |
| M532T789_1 | 532. 3269686 | 789. 293 | 27149325. 23 |
| M532T771_1 | 532. 3268742 | 771. 042 | 44301814. 07 |
| M532T789_2 | 532. 3386143 | 789. 293 | 84631600. 17 |
| M532T771_2 | 532. 3383519 | 771. 042 | 158020831. 1 |
| M532T789_3 | 532. 3508934 | 789. 293 | 24620645     |
| M532T771_3 | 532. 3514267 | 771. 042 | 52137442. 47 |
| M533T442_1 | 532. 7615404 | 442. 005 | 2911855. 545 |
| M533T442_2 | 532. 775886  | 442. 005 | 5720073. 82  |
| M533T101   | 533. 1518146 | 101. 161 | 28210066. 59 |
| M533T93    | 533. 1518108 | 92. 7272 | 10063232. 8  |
| M533T361   | 533. 151962  | 360. 794 | 4347514. 184 |
| M533T803   | 533. 2309313 | 802. 88  | 3857276. 615 |
| M533T789_1 | 533. 3366682 | 789. 293 | 23775703. 16 |
| M533T772   | 533. 3369912 | 772. 206 | 45099015. 74 |
| M533T789_2 | 533. 3475874 | 789. 293 | 28952205. 63 |
| M533T771   | 533. 3500098 | 771. 042 | 40095931. 67 |
| M533T649   | 533. 3971984 | 649. 338 | 5948747. 235 |
| M534T474_1 | 533. 6014511 | 473. 597 | 7347025. 808 |
| M534T474_2 | 533. 6131403 | 473. 597 | 6442989. 591 |
| M534T164   | 534. 1617691 | 163. 846 | 5066865. 725 |
| M534T151   | 534. 1633041 | 151. 016 | 6603677. 087 |
| M534T374   | 534. 2362963 | 373. 532 | 2802872. 364 |
| M534T743   | 534. 27177   | 742. 68  | 4478191. 901 |
| M534T772   | 534. 3428683 | 772. 206 | 13856239. 13 |
| M534T775   | 534. 354658  | 774. 919 | 31859123. 28 |
| M535T655   | 535. 242113  | 654. 542 | 2970180. 247 |
| M535T741   | 535. 2727185 | 741. 302 | 1433919. 084 |
| M535T623   | 535. 3244053 | 623. 11  | 15773518. 34 |
| M535T604   | 535. 3241386 | 603. 95  | 38693826. 11 |
| M535T775   | 535. 3657866 | 774. 919 | 6219672. 863 |
| M535T743   | 535. 4694954 | 742. 68  | 5955057. 741 |
| M535T795   | 535. 4697026 | 795. 165 | 47804123. 76 |
| M535T733   | 535. 4696671 | 732. 773 | 2916870. 162 |
| M535T838_1 | 535. 4653392 | 837. 524 | 244774174. 5 |
| M535T756   | 535. 469661  | 755. 537 | 7809054. 78  |
| M535T773   | 535. 4696525 | 773. 437 | 50378690. 28 |
| M535T813   | 535. 4769541 | 812. 862 | 50650567. 61 |

|            |              |          |              |
|------------|--------------|----------|--------------|
| M535T838_2 | 535. 4799985 | 837. 524 | 27538751. 62 |
| M536T528   | 536. 2386066 | 528. 185 | 3988636. 722 |
| M536T660   | 536. 2501373 | 660. 455 | 6220715. 094 |
| M536T706   | 536. 2506158 | 706. 229 | 10521857. 56 |
| M536T715   | 536. 2505446 | 715. 011 | 19004300. 16 |
| M536T775   | 536. 2800968 | 774. 919 | 21162548. 6  |
| M536T436   | 536. 3063807 | 436. 069 | 911453. 4449 |
| M536T604   | 536. 3266374 | 603. 95  | 12029590. 28 |
| M536T679_1 | 536. 3239781 | 678. 909 | 6228937. 981 |
| M536T679_2 | 536. 3354189 | 678. 909 | 3584621. 074 |
| M536T809   | 536. 3654809 | 808. 678 | 9031815. 312 |
| M536T776   | 536. 3792153 | 776. 194 | 5241344. 615 |
| M536T832   | 536. 4686282 | 831. 709 | 59882705. 06 |
| M536T813   | 536. 4728621 | 812. 862 | 27747458. 05 |
| M536T803   | 536. 4728728 | 802. 88  | 18658466. 25 |
| M537T706   | 536. 7514413 | 706. 229 | 5255065. 311 |
| M537T715_1 | 536. 7515782 | 715. 011 | 10040229. 8  |
| M537T230   | 537. 0992601 | 230. 321 | 2569371. 817 |
| M537T201   | 537. 0994153 | 200. 766 | 2665067. 516 |
| M537T582   | 537. 2280818 | 581. 625 | 5355200. 711 |
| M537T555_1 | 537. 2378609 | 555. 358 | 16446673. 99 |
| M537T629_1 | 537. 2353817 | 629. 015 | 14917147. 28 |
| M537T583_1 | 537. 244141  | 583. 068 | 39480840. 21 |
| M537T555_2 | 537. 2525244 | 555. 358 | 10071253. 64 |
| M537T629_2 | 537. 2500444 | 629. 015 | 22331592. 52 |
| M537T708   | 537. 2588302 | 707. 557 | 2233166. 846 |
| M537T715_2 | 537. 2586568 | 715. 011 | 4713993. 596 |
| M537T583_2 | 537. 2557261 | 583. 068 | 11977830. 62 |
| M537T775   | 537. 282802  | 774. 919 | 5284888. 659 |
| M537T776   | 537. 3801955 | 776. 194 | 3055489. 97  |
| M537T545   | 537. 3889506 | 545. 203 | 3574864. 011 |
| M537T824   | 537. 4800123 | 824. 311 | 5737885. 424 |
| M537T803   | 537. 4803666 | 802. 88  | 7867645. 63  |
| M538T629_1 | 537. 7375525 | 629. 015 | 9311371. 598 |
| M538T629_2 | 537. 749625  | 629. 015 | 15220756. 94 |
| M538T583_1 | 537. 7464835 | 583. 068 | 22112190. 63 |
| M538T583_2 | 537. 7587362 | 583. 068 | 3040725. 977 |
| M538T168   | 538. 0450696 | 167. 804 | 6602372. 494 |
| M538T325   | 538. 1204848 | 325. 35  | 3240791. 16  |
| M538T164   | 538. 2197547 | 163. 846 | 1740213. 903 |
| M538T311   | 538. 2183169 | 311. 445 | 2658524. 403 |
| M538T302   | 538. 2185648 | 302. 191 | 1731443. 68  |
| M538T583_3 | 538. 2494817 | 583. 068 | 28805521. 78 |
| M538T427   | 538. 2699838 | 427. 362 | 873937. 0009 |
| M538T519   | 538. 2839565 | 519. 257 | 957800. 1337 |
| M539T583   | 538. 7501952 | 583. 068 | 13918315. 3  |
| M539T163   | 539. 116416  | 162. 728 | 2581819. 024 |
| M539T644   | 539. 221778  | 643. 727 | 752520. 5508 |
| M539T813   | 539. 221741  | 812. 862 | 6943721. 444 |
| M539T584   | 539. 2585938 | 584. 417 | 4264202. 966 |
| M539T568   | 539. 2811542 | 568. 464 | 2174609. 361 |
| M539T415   | 539. 313944  | 414. 82  | 3581564. 211 |
| M540T477   | 539. 8046493 | 476. 554 | 1093698. 985 |
| M540T294   | 540. 0748247 | 293. 896 | 2518335. 946 |

|            |             |         |             |
|------------|-------------|---------|-------------|
| M540T210   | 540.0793222 | 210.186 | 1527794.399 |
| M540T104   | 540.2261    | 104.493 | 25099442.19 |
| M540T503   | 540.2461126 | 503.046 | 2832528.84  |
| M540T475   | 540.3064872 | 475.007 | 796206.9735 |
| M540T816   | 540.3071059 | 815.517 | 2395073.669 |
| M541T446   | 540.7719341 | 445.984 | 1464375.064 |
| M541T577   | 541.2405072 | 577.366 | 558670.7037 |
| M542T477   | 541.6394473 | 476.554 | 4050308.801 |
| M542T510   | 541.7929207 | 510.333 | 4284424.844 |
| M542T230   | 542.0965185 | 230.321 | 2718735.878 |
| M542T525   | 542.1880742 | 525.132 | 2149323.106 |
| M542T106   | 542.2391931 | 105.503 | 15196108.52 |
| M543T420_1 | 542.7690658 | 420.274 | 4750764.236 |
| M543T537   | 542.7720101 | 536.761 | 4946579.689 |
| M543T102   | 543.1291122 | 102.247 | 54573372.11 |
| M543T143_1 | 543.1230742 | 142.85  | 4082330.976 |
| M543T91    | 543.1290209 | 90.7088 | 4581362.564 |
| M543T118   | 543.1292936 | 118.116 | 49745968.63 |
| M543T143_2 | 543.1335757 | 142.85  | 6998326.206 |
| M543T509   | 543.1681163 | 508.883 | 987373.6861 |
| M543T376   | 543.1890735 | 376.409 | 1663131.83  |
| M543T622   | 543.2338923 | 621.708 | 2134724.241 |
| M543T420_2 | 543.2763208 | 420.274 | 4500425.276 |
| M543T405   | 543.284825  | 404.872 | 3681300.355 |
| M543T423_1 | 543.3059159 | 423.199 | 29387820.95 |
| M543T484   | 543.3088677 | 483.973 | 1517751.08  |
| M543T423_2 | 543.3179209 | 423.199 | 29926339.34 |
| M544T622   | 543.7409099 | 621.708 | 1908774.195 |
| M544T406   | 543.9464862 | 406.289 | 744487.7434 |
| M544T100   | 544.1327281 | 100.146 | 5001774.246 |
| M544T118   | 544.128956  | 118.116 | 6717877.77  |
| M544T329   | 544.2155364 | 329.481 | 6375840.222 |
| M544T582_1 | 544.2470528 | 581.625 | 42265421.21 |
| M544T582_2 | 544.2590917 | 581.625 | 30157648.37 |
| M544T771   | 544.2631586 | 771.042 | 4172586.262 |
| M544T399_1 | 544.2925543 | 399.046 | 55090397.67 |
| M544T399_2 | 544.3040461 | 399.046 | 26368486.88 |
| M544T423   | 544.3092199 | 423.199 | 8878417.76  |
| M544T31    | 544.3258539 | 31.4047 | 12694258.12 |
| M544T838_1 | 544.3314199 | 837.524 | 15705591.65 |
| M544T787   | 544.3305652 | 786.569 | 9974633.274 |
| M544T800_1 | 544.3312322 | 800.484 | 14741840.54 |
| M544T821   | 544.3318409 | 821.334 | 10513869.68 |
| M544T770   | 544.3435616 | 769.702 | 18087485    |
| M544T814   | 544.3435908 | 814.095 | 7427082.057 |
| M544T32    | 544.3408643 | 32.4171 | 59011184.1  |
| M544T838_2 | 544.3436357 | 837.524 | 16970007.35 |
| M544T800_2 | 544.3430034 | 800.484 | 12843190.01 |
| M545T582_1 | 544.7500852 | 581.625 | 26535211.12 |
| M545T580   | 544.7636654 | 580.22  | 6498795.306 |
| M545T503   | 545.194118  | 503.046 | 1546774.607 |
| M545T834_1 | 545.2119969 | 834.486 | 35000848.83 |
| M545T555   | 545.2298796 | 555.358 | 5155813.477 |
| M545T834_2 | 545.2239371 | 834.486 | 8466917.673 |

|            |              |          |              |
|------------|--------------|----------|--------------|
| M545T680   | 545. 236025  | 680. 402 | 7302367. 957 |
| M545T657   | 545. 2358569 | 657. 451 | 13211491. 73 |
| M545T647   | 545. 2421932 | 646. 794 | 3868074. 431 |
| M545T583   | 545. 2389662 | 583. 068 | 5366833. 286 |
| M545T309   | 545. 2483824 | 308. 967 | 6565652. 51  |
| M545T582_2 | 545. 2538054 | 581. 625 | 14089723. 08 |
| M545T399_1 | 545. 291032  | 399. 046 | 8717832. 828 |
| M545T399_2 | 545. 3056583 | 399. 046 | 11574817. 98 |
| M545T425   | 545. 3237228 | 424. 572 | 1135296. 49  |
| M545T32_1  | 545. 3329117 | 32. 4171 | 8433410. 979 |
| M545T32_2  | 545. 347965  | 32. 4171 | 10888343. 5  |
| M546T554   | 545. 7252135 | 553. 936 | 1977826. 495 |
| M546T834_1 | 546. 2073629 | 834. 486 | 4082759. 131 |
| M546T834_2 | 546. 2218515 | 834. 486 | 8630131. 617 |
| M546T555_1 | 546. 2394368 | 555. 358 | 21329205. 8  |
| M546T308   | 546. 2500454 | 307. 735 | 688992. 8258 |
| M546T555_2 | 546. 2545657 | 555. 358 | 44754821. 59 |
| M546T669_1 | 546. 2635544 | 668. 867 | 13046747. 27 |
| M546T718   | 546. 2661206 | 717. 959 | 6894306. 402 |
| M546T730   | 546. 2669974 | 729. 798 | 7253803. 15  |
| M546T669_2 | 546. 2770361 | 668. 867 | 4098148. 728 |
| M546T399   | 546. 300127  | 399. 046 | 2605032. 989 |
| M546T779   | 546. 3261742 | 778. 543 | 2044920. 853 |
| M546T823   | 546. 3513421 | 822. 881 | 83975224. 91 |
| M547T555_1 | 546. 7422112 | 555. 358 | 14301664. 56 |
| M547T555_2 | 546. 757264  | 555. 358 | 20682762. 6  |
| M547T484   | 547. 2188169 | 483. 973 | 3688384. 2   |
| M547T555_3 | 547. 245867  | 555. 358 | 8316872. 99  |
| M547T555_4 | 547. 2590084 | 555. 358 | 9168900. 264 |
| M547T669   | 547. 2703996 | 668. 867 | 3458601. 849 |
| M547T423   | 547. 2882341 | 423. 199 | 1258805. 891 |
| M547T497   | 547. 3309106 | 497. 214 | 1705683. 425 |
| M547T823   | 547. 3547638 | 822. 881 | 32940821. 22 |
| M548T293   | 548. 2153665 | 292. 623 | 1878981. 329 |
| M548T100   | 548. 2193252 | 100. 146 | 10484973. 74 |
| M548T89    | 548. 2193079 | 88. 6838 | 19475301. 04 |
| M548T802_1 | 548. 2368321 | 801. 685 | 36165011. 46 |
| M548T802_2 | 548. 2520459 | 801. 685 | 83213331. 27 |
| M548T485   | 548. 3574994 | 485. 471 | 4248414. 884 |
| M548T826   | 548. 3523679 | 825. 74  | 1759112. 657 |
| M548T775   | 548. 3645182 | 774. 919 | 69727560. 38 |
| M548T487   | 548. 372402  | 486. 885 | 1160711. 596 |
| M548T811   | 548. 3753736 | 811. 413 | 4388195. 486 |
| M548T772   | 548. 3753025 | 772. 206 | 28570738. 12 |
| M549T490   | 548. 8108481 | 489. 826 | 844939. 0504 |
| M549T143   | 549. 0899061 | 142. 85  | 28241973. 48 |
| M549T771_1 | 549. 2003907 | 771. 042 | 13386875. 85 |
| M549T832   | 549. 2060626 | 831. 709 | 6270125. 546 |
| M549T771_2 | 549. 2147923 | 771. 042 | 13731333. 08 |
| M549T772   | 549. 3736971 | 772. 206 | 7441771. 109 |
| M550T582   | 549. 774628  | 581. 625 | 2123270. 367 |
| M550T516_1 | 549. 7686866 | 516. 214 | 2398750. 775 |
| M550T516_2 | 549. 781626  | 516. 214 | 2630453. 723 |
| M550T114   | 550. 0918065 | 114. 15  | 4627650. 478 |

|            |             |         |             |
|------------|-------------|---------|-------------|
| M550T121   | 550.091699  | 120.525 | 5078536.406 |
| M550T144   | 550.0918708 | 143.959 | 4672484.935 |
| M550T314   | 550.1165772 | 314.259 | 4890954.96  |
| M550T455   | 550.2008511 | 454.739 | 358317.8846 |
| M550T98    | 550.2296344 | 97.7824 | 119930132.9 |
| M550T119   | 550.2298143 | 119.433 | 46038921.94 |
| M550T104   | 550.2297335 | 104.493 | 60858614.52 |
| M550T143   | 550.2297074 | 142.85  | 23409843.13 |
| M550T32    | 550.3276717 | 32.4171 | 691910.1669 |
| M551T669   | 551.219396  | 668.867 | 8742173.501 |
| M551T718_1 | 551.2189688 | 717.959 | 7369464.606 |
| M551T771   | 551.2165219 | 771.042 | 24059473.41 |
| M551T730_1 | 551.2166494 | 729.798 | 10859565.29 |
| M551T98    | 551.2349852 | 97.7824 | 23655919.52 |
| M551T104   | 551.2346915 | 104.493 | 16372648.73 |
| M551T121   | 551.235029  | 120.525 | 11935980.97 |
| M551T718_2 | 551.2312649 | 717.959 | 4254064.333 |
| M551T772   | 551.2272474 | 772.206 | 34235003.05 |
| M551T730_2 | 551.2287942 | 729.798 | 12530172.78 |
| M551T620_1 | 551.2439144 | 620.172 | 19744588.6  |
| M551T570_1 | 551.241479  | 570.01  | 8905530.517 |
| M551T620_2 | 551.2559038 | 620.172 | 8535404.91  |
| M551T570_2 | 551.2530564 | 570.01  | 5064675.383 |
| M551T422   | 551.27605   | 421.784 | 1425245.402 |
| M551T558_1 | 551.4005241 | 557.967 | 11157326    |
| M551T649   | 551.4064068 | 649.338 | 17713747.61 |
| M551T703   | 551.4031088 | 703.35  | 10339824.96 |
| M551T558_2 | 551.4158547 | 557.967 | 8595423.912 |
| M552T392_1 | 551.7743608 | 391.678 | 7063101.657 |
| M552T673   | 551.7843156 | 672.956 | 2257188.863 |
| M552T392_2 | 551.7859116 | 391.678 | 7631900.25  |
| M552T669   | 552.2241044 | 668.867 | 3396004.492 |
| M552T718   | 552.2240709 | 717.959 | 2302051.364 |
| M552T98    | 552.2363494 | 97.7824 | 4501153.051 |
| M552T555   | 552.254768  | 555.358 | 5066144.502 |
| M552T583   | 552.2535469 | 583.068 | 6637528.495 |
| M552T734   | 552.2717233 | 734.269 | 5987154.079 |
| M553T583   | 552.7473659 | 583.068 | 2380103.699 |
| M553T803   | 553.1917637 | 802.88  | 32507448.8  |
| M553T802   | 553.2069855 | 801.685 | 79634655.9  |
| M553T104   | 553.2315084 | 104.493 | 6067456.227 |
| M553T555_1 | 553.2560994 | 555.358 | 11946477.82 |
| M553T555_2 | 553.269453  | 555.358 | 1363904.366 |
| M554T803   | 554.1959822 | 802.88  | 11412774.36 |
| M554T297_1 | 554.201485  | 296.739 | 6864222.537 |
| M554T161   | 554.2139304 | 161.494 | 8732613.452 |
| M554T297_2 | 554.2140334 | 296.739 | 3783458.534 |
| M554T721   | 554.3284158 | 720.704 | 1612593.133 |
| M554T521   | 554.3314485 | 520.739 | 809332.9204 |
| M555T176   | 555.1220718 | 175.952 | 8938471.836 |
| M555T821_1 | 555.2115002 | 821.334 | 33112959.11 |
| M555T821_2 | 555.2239015 | 821.334 | 34541645.96 |
| M555T744   | 555.2506169 | 744.182 | 1897945.205 |
| M555T461   | 555.2763457 | 460.537 | 1724724.261 |



|            |              |          |              |
|------------|--------------|----------|--------------|
| M555T487   | 555. 2806201 | 486. 885 | 14809706. 27 |
| M555T803   | 555. 2857779 | 802. 88  | 4022011. 814 |
| M555T485   | 555. 295214  | 485. 471 | 32348468. 45 |
| M555T670   | 555. 3976907 | 670. 166 | 2858878. 32  |
| M555T545   | 555. 3948534 | 545. 203 | 15428937. 97 |
| M556T432   | 556. 2798652 | 431. 64  | 1570791. 374 |
| M556T485   | 556. 2864933 | 485. 471 | 6603778. 332 |
| M557T582_1 | 556. 7714625 | 581. 625 | 3004470. 938 |
| M557T582_2 | 556. 7863206 | 581. 625 | 615588. 4756 |
| M557T402   | 557. 264053  | 401. 963 | 4550384. 205 |
| M557T487   | 557. 2926463 | 486. 885 | 1618806. 547 |
| M557T423   | 557. 2971632 | 423. 199 | 1698005. 576 |
| M557T453   | 557. 32597   | 453. 317 | 1733849. 581 |
| M558T403   | 557. 819695  | 403. 447 | 10622923. 49 |
| M558T164   | 558. 0812357 | 163. 846 | 6936944. 83  |
| M558T118   | 558. 0821609 | 118. 116 | 19137634. 65 |
| M558T143   | 558. 0888017 | 142. 85  | 17902316. 47 |
| M558T232   | 558. 090116  | 231. 773 | 964337. 3849 |
| M558T104   | 558. 2353544 | 104. 493 | 23698707. 7  |
| M559T118   | 559. 0903335 | 118. 116 | 9648602. 636 |
| M559T334   | 559. 2187549 | 333. 715 | 1480852. 246 |
| M559T524   | 559. 2283107 | 523. 735 | 4028017. 712 |
| M559T580   | 559. 2563665 | 580. 22  | 907647. 1714 |
| M559T673_1 | 559. 272047  | 672. 956 | 39666832. 62 |
| M559T673_2 | 559. 2853877 | 672. 956 | 10408718. 26 |
| M559T584   | 559. 3599491 | 584. 417 | 14355900. 06 |
| M559T655   | 559. 3598701 | 654. 542 | 2672342. 06  |
| M560T673_1 | 559. 7709064 | 672. 956 | 21015671. 88 |
| M560T673_2 | 559. 7834609 | 672. 956 | 16957964. 09 |
| M560T96    | 560. 2210239 | 95. 7572 | 7781406. 655 |
| M560T555_1 | 560. 2377385 | 555. 358 | 15350112. 8  |
| M560T555_2 | 560. 2546879 | 555. 358 | 13707493. 04 |
| M560T674_1 | 560. 2707946 | 674. 402 | 6364065. 313 |
| M560T674_2 | 560. 2833715 | 674. 402 | 7415691. 913 |
| M560T584   | 560. 3618211 | 584. 417 | 4461892. 328 |
| M560T794   | 560. 3778311 | 793. 649 | 10400543. 08 |
| M561T662   | 561. 2308726 | 661. 979 | 4192058. 29  |
| M561T701   | 561. 227923  | 700. 758 | 3264012. 584 |
| M561T628   | 561. 2304623 | 627. 58  | 3500444. 047 |
| M561T314   | 561. 240914  | 314. 259 | 4714279. 421 |
| M561T554   | 561. 2434335 | 553. 936 | 3830294. 695 |
| M561T794   | 561. 3724537 | 793. 649 | 5273846. 363 |
| M561T830   | 561. 481847  | 830. 193 | 7395544. 378 |
| M561T810   | 561. 4819371 | 810. 052 | 2344891. 709 |
| M561T838   | 561. 4820278 | 837. 524 | 6952700. 456 |
| M561T823   | 561. 4832997 | 822. 881 | 4483432. 836 |
| M562T304   | 562. 2186949 | 303. 513 | 27131884     |
| M562T306   | 562. 2368656 | 306. 247 | 3302364. 619 |
| M562T639   | 562. 2603886 | 639. 219 | 5562254. 342 |
| M562T649   | 562. 2600166 | 649. 338 | 15853669. 91 |
| M562T728   | 562. 2587557 | 728. 25  | 11800275. 6  |
| M562T737   | 562. 2585296 | 737. 198 | 7167188. 861 |
| M562T716   | 562. 2589681 | 716. 403 | 12304933. 99 |
| M562T582   | 562. 2630127 | 581. 625 | 19312194. 59 |

|            |              |          |              |
|------------|--------------|----------|--------------|
| M562T80    | 562. 2698955 | 79. 643  | 3049749. 702 |
| M562T518   | 562. 2774143 | 517. 762 | 3130076. 782 |
| M562T796   | 562. 3815323 | 796. 474 | 2247750. 128 |
| M563T461   | 562. 6240861 | 460. 537 | 1964626. 233 |
| M563T304   | 563. 253875  | 303. 513 | 8710144. 76  |
| M563T582   | 563. 2603354 | 581. 625 | 3883787. 768 |
| M563T649   | 563. 2625975 | 649. 338 | 7687905. 801 |
| M563T516   | 563. 2881813 | 516. 214 | 1630887. 343 |
| M564T339   | 564. 1276337 | 339. 085 | 1445311. 513 |
| M564T672   | 564. 2598366 | 671. 649 | 6539112. 95  |
| M564T422   | 564. 2810685 | 421. 784 | 1946865. 689 |
| M564T531   | 564. 2981449 | 531. 127 | 2134417. 922 |
| M564T497   | 564. 3473811 | 497. 214 | 1944053. 096 |
| M564T530   | 564. 3939929 | 529. 713 | 1495605. 681 |
| M565T462_1 | 565. 1461816 | 461. 845 | 17753515. 31 |
| M565T452   | 565. 1462549 | 451. 804 | 6946589. 977 |
| M565T453   | 565. 1600866 | 453. 317 | 5942056. 039 |
| M565T462_2 | 565. 1603023 | 461. 845 | 15616762. 23 |
| M565T771   | 565. 1759468 | 771. 042 | 2573798. 097 |
| M565T628   | 565. 2165336 | 627. 58  | 3555468. 016 |
| M565T580   | 565. 2712763 | 580. 22  | 994472. 6186 |
| M565T639   | 565. 2781203 | 639. 219 | 3977654. 559 |
| M565T463   | 565. 2845471 | 463. 271 | 4809596. 296 |
| M566T435_1 | 565. 5302497 | 434. 589 | 2809583. 877 |
| M566T435_2 | 565. 7821693 | 434. 589 | 6180505. 391 |
| M566T462   | 566. 1525262 | 461. 845 | 7850605. 98  |
| M566T649   | 566. 2482823 | 649. 338 | 3871526. 283 |
| M566T636   | 566. 2801616 | 636. 473 | 25253853. 48 |
| M566T651   | 566. 2863941 | 650. 898 | 20221974. 97 |
| M567T636   | 566. 7821735 | 636. 473 | 15245856. 08 |
| M567T651   | 566. 7981923 | 650. 898 | 12184083. 41 |
| M567T463   | 567. 1565991 | 463. 271 | 859573. 6401 |
| M567T616   | 567. 1873298 | 615. 594 | 693099. 6396 |
| M567T670   | 567. 1936948 | 670. 166 | 1859925. 448 |
| M567T718   | 567. 1986404 | 717. 959 | 1143429. 927 |
| M567T730_1 | 567. 1983902 | 729. 798 | 2673298. 201 |
| M567T657_1 | 567. 2093176 | 657. 451 | 14572148. 44 |
| M567T582   | 567. 217426  | 581. 625 | 21102418. 44 |
| M567T737   | 567. 2143227 | 737. 198 | 8466724. 95  |
| M567T730_2 | 567. 2143013 | 729. 798 | 12931229. 1  |
| M567T639   | 567. 2269385 | 639. 219 | 7137961. 435 |
| M567T657_2 | 567. 2205988 | 657. 451 | 20749382. 62 |
| M567T557   | 567. 2610817 | 556. 816 | 2028500. 312 |
| M567T535   | 567. 2636651 | 535. 329 | 3081110. 176 |
| M567T504   | 567. 265195  | 504. 466 | 8239380. 467 |
| M567T423   | 567. 2814345 | 423. 199 | 848021. 5871 |
| M567T648   | 567. 2914638 | 648. 026 | 12072296. 29 |
| M567T562   | 567. 4000529 | 561. 955 | 30113310. 78 |
| M568T535   | 567. 7694272 | 535. 329 | 4356316. 79  |
| M568T582   | 568. 2179674 | 581. 625 | 5890364. 411 |
| M568T32_1  | 568. 3245206 | 32. 4171 | 77323899. 83 |
| M568T32_2  | 568. 3405339 | 32. 4171 | 394877293. 9 |
| M568T32_3  | 568. 3527463 | 32. 4171 | 31966435. 02 |
| M568T741   | 568. 3977343 | 741. 302 | 2919177. 445 |

|            |             |         |             |
|------------|-------------|---------|-------------|
| M569T466   | 569.0411578 | 466.162 | 1035694.813 |
| M569T206   | 569.1800302 | 205.903 | 7125219.644 |
| M569T739_1 | 569.2281414 | 738.697 | 7420814.944 |
| M569T739_2 | 569.2410226 | 738.697 | 5855819.068 |
| M569T453_1 | 569.2892052 | 453.317 | 14002320.39 |
| M569T453_2 | 569.3016915 | 453.317 | 8054845.457 |
| M569T32_1  | 569.3281262 | 32.4171 | 28532515.63 |
| M569T32_2  | 569.3441658 | 32.4171 | 130724647.7 |
| M569T32_3  | 569.3569117 | 32.4171 | 9422117.098 |
| M569T703_1 | 569.4083852 | 703.35  | 19241816.95 |
| M569T660_1 | 569.4114553 | 660.455 | 6533398.19  |
| M569T649   | 569.4179516 | 649.338 | 68346908.05 |
| M569T703_2 | 569.4244902 | 703.35  | 31285011.41 |
| M569T660_2 | 569.424141  | 660.455 | 7009464.788 |
| M570T453_1 | 569.5372481 | 453.317 | 13045011.05 |
| M570T453_2 | 569.5501406 | 453.317 | 12972586.73 |
| M570T426_1 | 569.7819473 | 425.909 | 10608153.56 |
| M570T426_2 | 569.7948403 | 425.909 | 9608336.899 |
| M570T425   | 570.036822  | 424.572 | 17132916.57 |
| M570T803   | 570.1755232 | 802.88  | 3632866.757 |
| M570T426_3 | 570.282134  | 425.909 | 9774237.275 |
| M570T426_4 | 570.2966033 | 425.909 | 9084581.91  |
| M570T32_1  | 570.337588  | 32.4171 | 17313955.35 |
| M570T32_2  | 570.3504775 | 32.4171 | 16585040.51 |
| M570T737_1 | 570.3696016 | 737.198 | 4607036.374 |
| M570T737_2 | 570.3825102 | 737.198 | 5369797.923 |
| M570T558_1 | 570.4147787 | 557.967 | 13312633.6  |
| M570T649_1 | 570.4138107 | 649.338 | 16904880.91 |
| M570T703_1 | 570.414775  | 703.35  | 12679815.12 |
| M570T558_2 | 570.4278964 | 557.967 | 12528821.18 |
| M570T649_2 | 570.4253713 | 649.338 | 24123426.89 |
| M570T660   | 570.4247507 | 660.455 | 2861945.439 |
| M570T703_2 | 570.4276952 | 703.35  | 13439911.58 |
| M571T84_1  | 570.8932765 | 83.5661 | 16188302.26 |
| M571T84_2  | 570.906255  | 83.5661 | 16251646.88 |
| M571T631   | 571.2101394 | 630.507 | 871875.0414 |
| M571T329   | 571.2202471 | 329.481 | 7902452.081 |
| M571T338   | 571.220079  | 337.767 | 10772338.21 |
| M571T311   | 571.2291136 | 311.445 | 6100997.054 |
| M571T353   | 571.2258297 | 352.65  | 5613104.359 |
| M571T299   | 571.2263406 | 299.493 | 3055521.813 |
| M571T32_1  | 571.3395721 | 32.4171 | 2194609.023 |
| M571T32_2  | 571.3525565 | 32.4171 | 2265460.385 |
| M571T649   | 571.4238852 | 649.338 | 4572276.155 |
| M572T622   | 571.741581  | 621.708 | 941820.2153 |
| M572T309   | 572.2147998 | 308.967 | 1637047.918 |
| M572T295   | 572.2126263 | 295.356 | 1245616.043 |
| M573T494   | 572.9787853 | 494.289 | 1365223.121 |
| M573T659_1 | 573.160395  | 658.953 | 55302432.28 |
| M573T659_2 | 573.1738614 | 658.953 | 20368732.67 |
| M573T600   | 573.2418926 | 599.621 | 2303897.803 |
| M573T582   | 573.2549185 | 581.625 | 2331114.279 |
| M573T639_1 | 573.2582068 | 639.219 | 8538510.876 |
| M573T459   | 573.2782357 | 458.985 | 2735871.884 |

|            |              |          |              |
|------------|--------------|----------|--------------|
| M573T639_2 | 573. 2744725 | 639. 219 | 53695228. 72 |
| M573T802   | 573. 2970968 | 801. 685 | 4456549. 273 |
| M573T545   | 573. 4211248 | 545. 203 | 40244695. 52 |
| M574T639_1 | 573. 7694206 | 639. 219 | 27100813. 82 |
| M574T639_2 | 573. 7843842 | 639. 219 | 10216108. 4  |
| M574T798_1 | 574. 1413916 | 797. 773 | 14641816. 02 |
| M574T798_2 | 574. 157572  | 797. 773 | 8928757. 513 |
| M574T659   | 574. 1770308 | 658. 953 | 4387257. 529 |
| M574T798_3 | 574. 1736578 | 797. 773 | 4100977. 05  |
| M574T638   | 574. 2674393 | 637. 996 | 11831290. 76 |
| M574T666   | 574. 2678568 | 666. 137 | 6043671. 825 |
| M574T651_1 | 574. 2778983 | 650. 898 | 259759500. 1 |
| M574T685   | 574. 2777973 | 684. 985 | 6447474. 207 |
| M574T516   | 574. 2880277 | 516. 214 | 3891994. 155 |
| M574T670   | 574. 2983484 | 670. 166 | 7106682. 694 |
| M574T651_2 | 574. 2988788 | 650. 898 | 11481178. 76 |
| M574T728   | 574. 2947328 | 728. 25  | 8448940. 766 |
| M574T772   | 574. 3044371 | 772. 206 | 4710662. 448 |
| M574T510   | 574. 3692403 | 510. 333 | 5472168. 78  |
| M574T538   | 574. 3791123 | 538. 316 | 4894856. 674 |
| M575T652   | 574. 769314  | 651. 956 | 51184114. 71 |
| M575T651_1 | 574. 7840804 | 650. 898 | 148783384. 9 |
| M575T516   | 574. 7915638 | 516. 214 | 811410. 6228 |
| M575T798   | 575. 1469074 | 797. 773 | 7725269. 453 |
| M575T445   | 575. 1669146 | 444. 725 | 3657004. 661 |
| M575T625   | 575. 2058303 | 624. 608 | 1627006. 682 |
| M575T753   | 575. 2390385 | 752. 541 | 4517016. 817 |
| M575T743   | 575. 2722644 | 742. 68  | 7903676. 374 |
| M575T651_2 | 575. 2809293 | 650. 898 | 54261251. 66 |
| M575T651_3 | 575. 2939977 | 650. 898 | 18379001. 4  |
| M575T669   | 575. 3004055 | 668. 867 | 2087072. 053 |
| M575T573   | 575. 3588205 | 573. 072 | 1167331. 1   |
| M575T545   | 575. 4186357 | 545. 203 | 3984346. 295 |
| M575T832_1 | 575. 4546599 | 831. 709 | 101271628. 9 |
| M575T804   | 575. 4677176 | 804. 327 | 19503209. 93 |
| M575T777   | 575. 4676136 | 777. 245 | 8557122. 871 |
| M575T832_2 | 575. 4677911 | 831. 709 | 82571845. 86 |
| M576T649_1 | 575. 776915  | 649. 338 | 10220802. 66 |
| M576T649_2 | 575. 7920103 | 649. 338 | 10347479. 89 |
| M576T798_1 | 576. 1657384 | 797. 773 | 7031675. 586 |
| M576T798_2 | 576. 178823  | 797. 773 | 6161201. 342 |
| M576T427   | 576. 2049856 | 427. 362 | 3288772. 993 |
| M576T98_1  | 576. 2081592 | 97. 7824 | 112629583. 1 |
| M576T98_2  | 576. 2203688 | 97. 7824 | 45869074. 78 |
| M576T803_1 | 576. 2705195 | 802. 88  | 38986359. 42 |
| M576T525   | 576. 2670466 | 525. 132 | 9163431. 815 |
| M576T649_3 | 576. 2828063 | 649. 338 | 3029482. 959 |
| M576T803_2 | 576. 2868964 | 802. 88  | 30950271. 17 |
| M576T579_1 | 576. 3685584 | 578. 816 | 3182031. 724 |
| M576T568_1 | 576. 3686755 | 568. 464 | 4857155. 547 |
| M576T579_2 | 576. 3800373 | 578. 816 | 87011739. 14 |
| M576T557_1 | 576. 3798908 | 556. 816 | 31995871. 1  |
| M576T568_2 | 576. 3804331 | 568. 464 | 125942249. 8 |
| M576T579_3 | 576. 3948014 | 578. 816 | 69680783. 87 |

|            |              |          |              |
|------------|--------------|----------|--------------|
| M576T557_2 | 576. 3948683 | 556. 816 | 26393544. 33 |
| M576T568_3 | 576. 3949039 | 568. 464 | 95598895. 05 |
| M577T98    | 577. 2093568 | 97. 7824 | 21934081. 48 |
| M577T716   | 577. 3641461 | 716. 403 | 4269109. 882 |
| M577T655   | 577. 3675249 | 654. 542 | 6161939. 889 |
| M577T582   | 577. 3706562 | 581. 625 | 44357603. 4  |
| M577T595   | 577. 3705759 | 595. 066 | 6213929. 573 |
| M577T579_1 | 577. 3838284 | 578. 816 | 34709314. 02 |
| M577T557   | 577. 3835775 | 556. 816 | 9249005. 537 |
| M577T568_1 | 577. 3838331 | 568. 464 | 38041938. 9  |
| M577T579_2 | 577. 3970056 | 578. 816 | 28160084. 94 |
| M577T568_2 | 577. 3970722 | 568. 464 | 39040355. 09 |
| M578T403   | 578. 2070602 | 403. 447 | 2877913. 171 |
| M578T316   | 578. 2300533 | 315. 701 | 1972876. 997 |
| M578T662   | 578. 2533566 | 661. 979 | 8482091. 946 |
| M578T582   | 578. 3686381 | 581. 625 | 10319666. 25 |
| M578T598_1 | 578. 3902176 | 598. 125 | 22234973. 2  |
| M578T538_1 | 578. 3951314 | 538. 316 | 93160864. 61 |
| M578T580_1 | 578. 389913  | 580. 22  | 14366227     |
| M578T568   | 578. 391914  | 568. 464 | 13516132. 21 |
| M578T598_2 | 578. 4017566 | 598. 125 | 63569513. 75 |
| M578T580_2 | 578. 4019506 | 580. 22  | 39883943. 38 |
| M578T570   | 578. 409574  | 570. 01  | 9249659. 917 |
| M578T538_2 | 578. 4116202 | 538. 316 | 87088904     |
| M578T598_3 | 578. 4182471 | 598. 125 | 6108532. 896 |
| M579T82    | 578. 7647629 | 82. 0569 | 11837458. 2  |
| M579T659_1 | 579. 1408387 | 658. 953 | 4737576. 964 |
| M579T659_2 | 579. 1542434 | 658. 953 | 3905582. 439 |
| M579T295   | 579. 2441139 | 295. 356 | 799730. 6324 |
| M579T821   | 579. 2931447 | 821. 334 | 2365142. 868 |
| M579T631_1 | 579. 3806333 | 630. 507 | 36447566. 28 |
| M579T567   | 579. 3828521 | 567. 1   | 13693993. 53 |
| M579T583_1 | 579. 3795482 | 583. 068 | 18840916. 58 |
| M579T728   | 579. 3859692 | 728. 25  | 5360521. 514 |
| M579T555_1 | 579. 3855385 | 555. 358 | 72998507. 39 |
| M579T600   | 579. 3930028 | 599. 621 | 8605358. 392 |
| M579T631_2 | 579. 3928935 | 630. 507 | 31717040. 1  |
| M579T583_2 | 579. 3933729 | 583. 068 | 19726018. 33 |
| M579T538_1 | 579. 4023671 | 538. 316 | 49607097. 5  |
| M579T555_2 | 579. 3987749 | 555. 358 | 24090349. 75 |
| M579T598   | 579. 4090904 | 598. 125 | 19935068. 69 |
| M579T538_2 | 579. 4155931 | 538. 316 | 27971754. 19 |
| M580T167   | 579. 6608992 | 166. 613 | 15905901. 01 |
| M580T306   | 580. 183395  | 306. 247 | 3746406. 067 |
| M580T147   | 580. 2330864 | 146. 742 | 4457641. 478 |
| M580T190   | 580. 2370122 | 189. 571 | 9179051. 11  |
| M580T108   | 580. 2363936 | 107. 537 | 15399852. 11 |
| M580T295   | 580. 238453  | 295. 356 | 8660403. 853 |
| M580T515   | 580. 2433154 | 514. 727 | 5391685. 601 |
| M580T555   | 580. 3886719 | 555. 358 | 24525485. 85 |
| M580T629   | 580. 3857527 | 629. 015 | 10267155. 17 |
| M580T631   | 580. 3980164 | 630. 507 | 6980763. 715 |
| M580T538   | 580. 4089845 | 538. 316 | 12749667. 46 |
| M581T423_1 | 580. 7800548 | 423. 199 | 5636162. 013 |

|            |              |          |              |
|------------|--------------|----------|--------------|
| M581T503_1 | 580. 783867  | 503. 046 | 5309243. 526 |
| M581T503_2 | 580. 7971348 | 503. 046 | 4585347. 429 |
| M581T423_2 | 581. 0434473 | 423. 199 | 4181052. 386 |
| M581T537_1 | 581. 2155004 | 536. 761 | 4661969. 757 |
| M581T525_1 | 581. 2155651 | 525. 132 | 25823483. 41 |
| M581T577_1 | 581. 2292239 | 577. 366 | 4972846. 755 |
| M581T308   | 581. 2318123 | 307. 735 | 1473245. 665 |
| M581T537_2 | 581. 2303939 | 536. 761 | 1949340. 393 |
| M581T297   | 581. 2318382 | 296. 739 | 1832155. 661 |
| M581T515   | 581. 2302299 | 514. 727 | 2775587. 585 |
| M581T525_2 | 581. 2303298 | 525. 132 | 11363979. 4  |
| M581T577_2 | 581. 2420182 | 577. 366 | 3600500. 192 |
| M581T639_1 | 581. 2509575 | 639. 219 | 2150051. 649 |
| M581T639_2 | 581. 2654518 | 639. 219 | 1719657. 487 |
| M581T586_1 | 581. 2621722 | 585. 968 | 11174994. 22 |
| M581T586_2 | 581. 2787706 | 585. 968 | 9770988. 878 |
| M581T423_3 | 581. 2782753 | 423. 199 | 3033185. 852 |
| M581T503_3 | 581. 2852122 | 503. 046 | 3134358. 787 |
| M582T586   | 581. 7706981 | 585. 968 | 11330768. 01 |
| M582T499   | 582. 1502999 | 498. 645 | 2542005. 846 |
| M582T584   | 582. 27083   | 584. 417 | 6245893. 755 |
| M582T651   | 582. 2699564 | 650. 898 | 14000729. 23 |
| M582T633   | 582. 2765009 | 633. 476 | 2810442. 785 |
| M582T567   | 582. 2727554 | 567. 1   | 7504564. 527 |
| M582T642   | 582. 2825898 | 642. 211 | 3994917. 569 |
| M583T647   | 582. 7758589 | 646. 794 | 5318496. 75  |
| M583T573   | 582. 7768583 | 573. 072 | 10654750. 07 |
| M583T494   | 582. 7799107 | 494. 289 | 742816. 7113 |
| M583T317   | 583. 1803493 | 317. 199 | 2379168. 03  |
| M583T657   | 583. 1905021 | 657. 451 | 4304454. 902 |
| M583T583   | 583. 1973137 | 583. 068 | 6223409. 673 |
| M583T665   | 583. 2182979 | 664. 745 | 6492750. 564 |
| M583T572   | 583. 2191693 | 571. 523 | 3496843. 081 |
| M583T525   | 583. 2334831 | 525. 132 | 4243430. 264 |
| M583T652   | 583. 2708565 | 651. 956 | 7636731. 363 |
| M583T588   | 583. 3940415 | 587. 521 | 7251361. 724 |
| M584T458   | 584. 0461207 | 457. 576 | 1213794. 666 |
| M584T583   | 584. 193333  | 583. 068 | 2197071. 962 |
| M585T534   | 584. 8065544 | 533. 958 | 1301285. 943 |
| M585T381   | 585. 2420994 | 380. 63  | 3588439. 863 |
| M585T668   | 585. 2897849 | 667. 609 | 1940039. 19  |
| M585T411_1 | 585. 3670605 | 410. 542 | 3046426. 417 |
| M585T411_2 | 585. 3804752 | 410. 542 | 2161179. 74  |
| M585T562_1 | 585. 4074561 | 561. 955 | 104812606    |
| M585T694   | 585. 4059945 | 693. 81  | 5363726. 401 |
| M585T639   | 585. 4140558 | 639. 219 | 8433502. 574 |
| M585T670   | 585. 4077206 | 670. 166 | 4173036. 48  |
| M585T562_2 | 585. 4208838 | 561. 955 | 75554202. 59 |
| M586T562   | 586. 4123217 | 561. 955 | 43781822. 21 |
| M587T636   | 586. 7882556 | 636. 473 | 1373891. 179 |
| M587T84    | 586. 8711107 | 83. 5661 | 20328514. 16 |
| M587T310   | 587. 1538485 | 310. 075 | 4382911. 442 |
| M587T239_1 | 587. 1573633 | 238. 605 | 15211250. 9  |
| M587T163   | 587. 1659202 | 162. 728 | 1741044. 819 |

|            |              |          |              |
|------------|--------------|----------|--------------|
| M587T297   | 587. 1704194 | 296. 739 | 4977422. 285 |
| M587T239_2 | 587. 1707462 | 238. 605 | 13203869. 51 |
| M587T798   | 587. 1743027 | 797. 773 | 7732697. 725 |
| M587T445   | 587. 3552409 | 444. 725 | 1485234. 264 |
| M587T719_1 | 587. 4168227 | 719. 215 | 38682343. 3  |
| M587T703_1 | 587. 4156821 | 703. 35  | 116977619. 8 |
| M587T558_1 | 587. 4177914 | 557. 967 | 54933921. 21 |
| M587T649_1 | 587. 424158  | 649. 338 | 303938099. 9 |
| M587T682_1 | 587. 4243818 | 681. 885 | 21597788. 55 |
| M587T632_1 | 587. 4240269 | 631. 982 | 28496007. 25 |
| M587T772_1 | 587. 4207261 | 772. 206 | 82292916. 74 |
| M587T719_2 | 587. 4308236 | 719. 215 | 104111947. 1 |
| M587T703_2 | 587. 4308717 | 703. 35  | 312408026    |
| M587T558_2 | 587. 4343338 | 557. 967 | 103978494. 1 |
| M587T649_2 | 587. 438003  | 649. 338 | 167663741. 7 |
| M587T682_2 | 587. 4376456 | 681. 885 | 12499466. 84 |
| M587T620   | 587. 4343618 | 620. 172 | 10401079. 14 |
| M587T632_2 | 587. 4390073 | 631. 982 | 16249850. 4  |
| M587T772_2 | 587. 4376046 | 772. 206 | 64728111. 32 |
| M587T719_3 | 587. 442244  | 719. 215 | 26797446. 48 |
| M588T241   | 587. 6605192 | 241. 368 | 6787923. 316 |
| M588T243   | 587. 6749055 | 242. 682 | 2217418. 938 |
| M588T685   | 587. 7922972 | 684. 985 | 2186101. 412 |
| M588T163   | 588. 0558279 | 162. 728 | 2711393. 267 |
| M588T240   | 588. 161611  | 239. 913 | 2052042. 645 |
| M588T260_1 | 588. 177898  | 259. 74  | 45041457. 86 |
| M588T209_1 | 588. 1763154 | 208. 905 | 20816778. 35 |
| M588T222_1 | 588. 1762958 | 222. 017 | 23507424. 83 |
| M588T176   | 588. 1841354 | 175. 952 | 14683003. 85 |
| M588T260_2 | 588. 1888784 | 259. 74  | 27142828. 06 |
| M588T209_2 | 588. 1881457 | 208. 905 | 12072521. 85 |
| M588T222_2 | 588. 1881155 | 222. 017 | 13295596. 06 |
| M588T100_1 | 588. 204701  | 100. 146 | 75091199. 86 |
| M588T100_2 | 588. 2182271 | 100. 146 | 64821937. 65 |
| M588T216   | 588. 2309473 | 216. 359 | 1466961. 623 |
| M588T471   | 588. 3449782 | 470. 602 | 2458606. 255 |
| M588T487   | 588. 347125  | 486. 885 | 3662451. 234 |
| M588T817   | 588. 4090472 | 816. 953 | 5475810. 918 |
| M588T649_1 | 588. 4152543 | 649. 338 | 24738035. 19 |
| M588T719_1 | 588. 4278073 | 719. 215 | 37264885. 5  |
| M588T703_1 | 588. 427924  | 703. 35  | 114800694. 2 |
| M588T772_1 | 588. 4278531 | 772. 206 | 48215799. 09 |
| M588T649_2 | 588. 4313341 | 649. 338 | 138564369. 7 |
| M588T632   | 588. 4310997 | 631. 982 | 11007572. 06 |
| M588T719_2 | 588. 4425635 | 719. 215 | 18568905. 13 |
| M588T703_2 | 588. 4429525 | 703. 35  | 57523437. 22 |
| M588T772_2 | 588. 4414158 | 772. 206 | 23779037. 99 |
| M588T649_3 | 588. 442507  | 649. 338 | 61865701. 66 |
| M589T425_1 | 588. 5455657 | 424. 572 | 1624724. 484 |
| M589T263   | 588. 678851  | 262. 529 | 29034294. 33 |
| M589T223   | 588. 6787617 | 223. 474 | 15218994. 58 |
| M589T209_1 | 588. 6820003 | 208. 905 | 11381095. 16 |
| M589T425_2 | 588. 7902936 | 424. 572 | 2093225. 637 |
| M589T477   | 588. 8000688 | 476. 554 | 442224. 1903 |

|            |              |          |              |
|------------|--------------|----------|--------------|
| M589T425_3 | 588. 8043732 | 424. 572 | 1975385. 763 |
| M589T426   | 589. 0481725 | 425. 909 | 1576758. 455 |
| M589T260   | 589. 1770826 | 259. 74  | 19888908. 22 |
| M589T209_2 | 589. 1730527 | 208. 905 | 4504022. 263 |
| M589T175   | 589. 1800615 | 174. 865 | 5326404. 904 |
| M589T209_3 | 589. 1869555 | 208. 905 | 4497776. 884 |
| M589T331   | 589. 222104  | 330. 809 | 9252025. 199 |
| M589T321_1 | 589. 2213032 | 321. 198 | 14303098. 24 |
| M589T346   | 589. 2348698 | 345. 848 | 7859123. 437 |
| M589T321_2 | 589. 2346119 | 321. 198 | 71334525. 42 |
| M589T586   | 589. 2545722 | 585. 968 | 1209374. 73  |
| M589T803_1 | 589. 2681234 | 802. 88  | 5030476. 433 |
| M589T803_2 | 589. 2805791 | 802. 88  | 3194449. 548 |
| M589T617   | 589. 3156114 | 617. 133 | 2993041. 076 |
| M589T481   | 589. 3196576 | 481. 042 | 2953396. 634 |
| M589T703_1 | 589. 4275874 | 703. 35  | 17572291. 95 |
| M589T649   | 589. 43427   | 649. 338 | 30584712. 72 |
| M589T703_2 | 589. 4410496 | 703. 35  | 19601306. 61 |
| M589T648   | 589. 4461291 | 648. 026 | 10005338. 06 |
| M590T264_1 | 589. 6752638 | 264. 079 | 2914752. 511 |
| M590T256_1 | 589. 6756887 | 255. 723 | 2117912. 88  |
| M590T264_2 | 589. 6888479 | 264. 079 | 2567748. 411 |
| M590T256_2 | 589. 6888004 | 255. 723 | 1864895. 919 |
| M590T102_1 | 590. 2141608 | 102. 247 | 74376041. 83 |
| M590T102_2 | 590. 2259773 | 102. 247 | 207365533. 4 |
| M590T329   | 590. 2430476 | 329. 481 | 5068327. 233 |
| M590T102_3 | 590. 2377968 | 102. 247 | 97153048. 38 |
| M590T323   | 590. 2427466 | 322. 536 | 6435494. 45  |
| M590T682_1 | 590. 2873128 | 681. 885 | 4867286. 003 |
| M590T651   | 590. 2870892 | 650. 898 | 12864652. 33 |
| M590T692_1 | 590. 2878463 | 692. 461 | 2549627. 059 |
| M590T582_1 | 590. 2902537 | 581. 625 | 21483560. 79 |
| M590T730   | 590. 2972319 | 729. 798 | 17257532. 97 |
| M590T639   | 590. 3005545 | 639. 219 | 2875491. 546 |
| M590T649_1 | 590. 3006535 | 649. 338 | 6131366. 395 |
| M590T682_2 | 590. 3008691 | 681. 885 | 4494928. 295 |
| M590T692_2 | 590. 300997  | 692. 461 | 2042016. 827 |
| M590T657   | 590. 3009604 | 657. 451 | 3164441. 876 |
| M590T582_2 | 590. 3045871 | 581. 625 | 6926587. 736 |
| M590T499   | 590. 3539719 | 498. 645 | 21216258. 43 |
| M590T471_1 | 590. 351441  | 470. 602 | 40986370. 69 |
| M590T525   | 590. 3651859 | 525. 132 | 7594835. 695 |
| M590T500_1 | 590. 3652744 | 500. 045 | 58194169. 88 |
| M590T471_2 | 590. 3684975 | 470. 602 | 136692752. 6 |
| M590T500_2 | 590. 3817009 | 500. 045 | 16942937. 46 |
| M590T471_3 | 590. 3824727 | 470. 602 | 31475160. 59 |
| M590T528_1 | 590. 381885  | 528. 185 | 2772027. 469 |
| M590T568_1 | 590. 3957551 | 568. 464 | 43416280. 66 |
| M590T528_2 | 590. 4025608 | 528. 185 | 58514216. 4  |
| M590T568_2 | 590. 4093549 | 568. 464 | 44912519. 56 |
| M590T528_3 | 590. 4157948 | 528. 185 | 12839659. 35 |
| M590T649_2 | 590. 4400277 | 649. 338 | 3792683. 922 |
| M591T519_1 | 590. 6541344 | 519. 257 | 4737628. 039 |
| M591T519_2 | 590. 9878592 | 519. 257 | 1982628. 193 |



|            |              |          |              |
|------------|--------------|----------|--------------|
| M591T836   | 591. 2129489 | 836. 034 | 1019131. 528 |
| M591T102   | 591. 2300951 | 102. 247 | 53155966. 82 |
| M591T582   | 591. 2981733 | 581. 625 | 8365324. 178 |
| M591T506   | 591. 3018085 | 505. 855 | 17682611. 13 |
| M591T500_1 | 591. 3629912 | 500. 045 | 13940558. 76 |
| M591T471_1 | 591. 3696816 | 470. 602 | 50586552. 08 |
| M591T500_2 | 591. 3766309 | 500. 045 | 14533988. 6  |
| M591T471_2 | 591. 3807091 | 470. 602 | 23627485. 33 |
| M591T528_1 | 591. 3969101 | 528. 185 | 10400698. 89 |
| M591T568   | 591. 4105909 | 568. 464 | 15877548. 63 |
| M591T528_2 | 591. 4139491 | 528. 185 | 13742561. 57 |
| M591T545   | 591. 4278813 | 545. 203 | 9206129. 821 |
| M592T95    | 592. 2027509 | 94. 7467 | 47286016. 13 |
| M592T102   | 592. 2300673 | 102. 247 | 9541829. 587 |
| M592T475_1 | 592. 2915005 | 475. 007 | 20401476. 71 |
| M592T475_2 | 592. 3057299 | 475. 007 | 9194551. 408 |
| M592T554_1 | 592. 3660786 | 553. 936 | 28413140. 54 |
| M592T510_1 | 592. 3649855 | 510. 333 | 129764280. 3 |
| M592T471   | 592. 3724079 | 470. 602 | 44716842. 26 |
| M592T535   | 592. 3771275 | 535. 329 | 17663355. 16 |
| M592T554_2 | 592. 376655  | 553. 936 | 210968033    |
| M592T510_2 | 592. 3769461 | 510. 333 | 871178423. 4 |
| M592T455_1 | 592. 3768962 | 454. 739 | 9893452. 793 |
| M592T477   | 592. 3891532 | 476. 554 | 10336452. 59 |
| M592T499   | 592. 3884583 | 498. 645 | 40783846. 93 |
| M592T485   | 592. 3890431 | 485. 471 | 13013914. 97 |
| M592T466   | 592. 3890254 | 466. 162 | 12622197. 5  |
| M592T537   | 592. 3885515 | 536. 761 | 17768697. 3  |
| M592T554_3 | 592. 388617  | 553. 936 | 224796761. 4 |
| M592T510_3 | 592. 3889094 | 510. 333 | 906718686. 3 |
| M592T455_2 | 592. 3891139 | 454. 739 | 9916397. 956 |
| M592T554_4 | 592. 4005729 | 553. 936 | 13740079. 29 |
| M592T512   | 592. 4025736 | 511. 77  | 45476158. 89 |
| M592T528   | 592. 4025049 | 528. 185 | 6339352. 861 |
| M592T559   | 592. 4144792 | 559. 459 | 14827152. 7  |
| M593T474   | 593. 3016417 | 473. 597 | 9722304. 422 |
| M593T574   | 593. 3601582 | 574. 363 | 3792854. 734 |
| M593T554_1 | 593. 3691452 | 553. 936 | 8462428. 786 |
| M593T510_1 | 593. 3706286 | 510. 333 | 57784500. 69 |
| M593T554_2 | 593. 3829318 | 553. 936 | 87922993. 46 |
| M593T510_2 | 593. 3866703 | 510. 333 | 379601823. 9 |
| M593T466   | 593. 3867534 | 466. 162 | 5552907. 739 |
| M593T554_3 | 593. 3999829 | 553. 936 | 15109763. 35 |
| M593T512   | 593. 4020673 | 511. 77  | 57257525. 68 |
| M594T459   | 593. 8029475 | 458. 985 | 3421684. 606 |
| M594T462   | 594. 0521533 | 461. 845 | 3835939. 378 |
| M594T336   | 594. 1957445 | 336. 344 | 12553092. 31 |
| M594T432   | 594. 2893212 | 431. 64  | 5897276. 933 |
| M594T533   | 594. 2960789 | 532. 526 | 4819211. 704 |
| M594T435   | 594. 3137534 | 434. 589 | 1217894. 054 |
| M594T521   | 594. 3473108 | 520. 739 | 795314. 7016 |
| M594T574   | 594. 3648551 | 574. 363 | 1503890. 302 |
| M594T507_1 | 594. 3837341 | 507. 343 | 325620128    |
| M594T538_1 | 594. 3869227 | 538. 316 | 206020297. 3 |

|            |              |          |              |
|------------|--------------|----------|--------------|
| M594T493   | 594. 3990647 | 492. 895 | 36046373. 97 |
| M594T482   | 594. 3993781 | 482. 436 | 13494192. 92 |
| M594T507_2 | 594. 3956644 | 507. 343 | 964152950. 9 |
| M594T522   | 594. 4075891 | 522. 177 | 10984064. 98 |
| M594T538_2 | 594. 3989473 | 538. 316 | 395079607. 4 |
| M594T507_3 | 594. 4077275 | 507. 343 | 556446041. 9 |
| M594T507_4 | 594. 4198444 | 507. 343 | 11747007. 93 |
| M595T435   | 594. 5079914 | 434. 589 | 1472095. 471 |
| M595T433   | 594. 5274738 | 433. 111 | 3738300. 875 |
| M595T432   | 594. 5392694 | 431. 64  | 7645071. 936 |
| M595T82    | 594. 7359166 | 82. 0569 | 20208286. 27 |
| M595T240   | 595. 1486593 | 239. 913 | 6307750. 14  |
| M595T355   | 595. 1804111 | 355. 41  | 3221461. 151 |
| M595T685_1 | 595. 2794611 | 684. 985 | 32339870. 7  |
| M595T685_2 | 595. 2932326 | 684. 985 | 24435975. 12 |
| M595T507_1 | 595. 386806  | 507. 343 | 65419062. 38 |
| M595T538_1 | 595. 393293  | 538. 316 | 89302866. 8  |
| M595T493   | 595. 400453  | 492. 895 | 13420473. 9  |
| M595T482   | 595. 4005211 | 482. 436 | 4718057. 337 |
| M595T507_2 | 595. 4003764 | 507. 343 | 346840005. 9 |
| M595T538_2 | 595. 4105146 | 538. 316 | 73721228. 15 |
| M595T506   | 595. 4209204 | 505. 855 | 9309923. 219 |
| M596T239   | 595. 6480414 | 238. 605 | 1691619. 057 |
| M596T685_1 | 595. 7790742 | 684. 985 | 14922847. 98 |
| M596T385   | 595. 7855885 | 385. 081 | 1410212. 411 |
| M596T685_2 | 595. 792863  | 684. 985 | 17223988. 1  |
| M596T286_1 | 596. 1515181 | 285. 9   | 13930203. 21 |
| M596T267   | 596. 1511513 | 267. 171 | 26431634. 19 |
| M596T258   | 596. 1515057 | 258. 489 | 40483583. 08 |
| M596T223_1 | 596. 1622959 | 223. 474 | 155100700. 8 |
| M596T126   | 596. 1621904 | 125. 598 | 29265035. 16 |
| M596T110_1 | 596. 1620679 | 110. 047 | 23791488. 18 |
| M596T176_1 | 596. 16251   | 175. 952 | 97219860. 56 |
| M596T209_1 | 596. 1622802 | 208. 905 | 120686954. 6 |
| M596T148   | 596. 1622512 | 148. 117 | 50011807. 23 |
| M596T286_2 | 596. 1622173 | 285. 9   | 55608069. 31 |
| M596T260_1 | 596. 1622521 | 259. 74  | 348414356. 8 |
| M596T147   | 596. 1761596 | 146. 742 | 13649794     |
| M596T286_3 | 596. 1774347 | 285. 9   | 46509129. 78 |
| M596T165   | 596. 1758428 | 165. 217 | 21870937. 85 |
| M596T110_2 | 596. 1758772 | 110. 047 | 21289320. 31 |
| M596T176_2 | 596. 1771915 | 175. 952 | 75152453. 27 |
| M596T124   | 596. 1760245 | 124. 487 | 33598890. 87 |
| M596T223_2 | 596. 1778234 | 223. 474 | 128465826. 7 |
| M596T260_2 | 596. 1777766 | 259. 74  | 291221011. 7 |
| M596T209_2 | 596. 1778101 | 208. 905 | 101761057. 7 |
| M596T339   | 596. 2221048 | 339. 085 | 2709686. 68  |
| M596T104   | 596. 2200652 | 104. 493 | 4229777. 679 |
| M596T341   | 596. 238765  | 340. 548 | 4415927. 376 |
| M596T685_3 | 596. 2804538 | 684. 985 | 4736650. 9   |
| M596T685_4 | 596. 2999705 | 684. 985 | 902696. 5421 |
| M596T507_1 | 596. 4005372 | 507. 343 | 67909646. 88 |
| M596T507_2 | 596. 4152524 | 507. 343 | 14945074. 36 |
| M597T223_1 | 596. 6579109 | 223. 474 | 39227162. 14 |

|            |             |         |             |
|------------|-------------|---------|-------------|
| M597T286_1 | 596.6589172 | 285.9   | 13691133.45 |
| M597T260_1 | 596.6579688 | 259.74  | 87074617.02 |
| M597T209_1 | 596.6631387 | 208.905 | 51642244.91 |
| M597T176_1 | 596.6667748 | 175.952 | 52013266.59 |
| M597T147   | 596.6733627 | 146.742 | 25039588.53 |
| M597T223_2 | 596.6734557 | 223.474 | 87260056.39 |
| M597T286_2 | 596.6733119 | 285.9   | 30413863.1  |
| M597T260_2 | 596.673423  | 259.74  | 190714514   |
| M597T192   | 596.6738116 | 192.437 | 15621932.32 |
| M597T111   | 596.6734754 | 111.382 | 17545151.35 |
| M597T131   | 596.6738142 | 130.668 | 8261008.512 |
| M597T209_2 | 596.6735037 | 208.905 | 70072008.43 |
| M597T477   | 597.1302891 | 476.554 | 16178009.58 |
| M597T475   | 597.153924  | 475.007 | 27226250.74 |
| M597T223_3 | 597.1611507 | 223.474 | 15968889.74 |
| M597T209_3 | 597.1612192 | 208.905 | 13162649.24 |
| M597T260_3 | 597.1679221 | 259.74  | 78727378.87 |
| M597T176_2 | 597.1683912 | 175.952 | 22200033.72 |
| M597T426_1 | 597.1710243 | 425.909 | 10893123.82 |
| M597T223_4 | 597.1715282 | 223.474 | 36044953.07 |
| M597T209_4 | 597.1715744 | 208.905 | 30062961.68 |
| M597T426_2 | 597.1881051 | 425.909 | 9956950.755 |
| M597T753   | 597.2265208 | 752.541 | 6702418.009 |
| M597T521   | 597.3293514 | 520.739 | 1008128.805 |
| M598T465   | 597.5483804 | 464.668 | 2178659.086 |
| M598T223_1 | 597.6666952 | 223.474 | 7965758.53  |
| M598T260   | 597.6735012 | 259.74  | 22579184.94 |
| M598T177   | 597.6760942 | 177.295 | 3930496.401 |
| M598T223_2 | 597.6784517 | 223.474 | 6879096.939 |
| M598T207   | 597.679208  | 207.393 | 4384353.336 |
| M598T475_1 | 598.1376141 | 475.007 | 11690653.25 |
| M598T475_2 | 598.1549545 | 475.007 | 12518937.72 |
| M598T225   | 598.1619716 | 224.729 | 3688277.102 |
| M598T266   | 598.1615489 | 265.624 | 3051763.166 |
| M598T254   | 598.1611379 | 254.446 | 3183547.123 |
| M598T258   | 598.1756067 | 258.489 | 5597915.138 |
| M598T222   | 598.1792647 | 222.017 | 7087400.676 |
| M598T299   | 598.189856  | 299.493 | 11030250.14 |
| M598T310   | 598.2026756 | 310.075 | 2899114.256 |
| M598T211   | 598.200244  | 211.288 | 36913407.52 |
| M598T163   | 598.2356117 | 162.728 | 9916856.656 |
| M598T144_1 | 598.2347293 | 143.959 | 14267049.73 |
| M598T294   | 598.2392097 | 293.896 | 9228058.43  |
| M598T106   | 598.2419569 | 105.503 | 63819190.06 |
| M598T161   | 598.2491349 | 161.494 | 8877598.368 |
| M598T144_2 | 598.2486131 | 143.959 | 15897437.36 |
| M598T638   | 598.280336  | 637.996 | 1221452.727 |
| M598T519   | 598.3210349 | 519.257 | 1220374.672 |
| M599T427_1 | 598.5367613 | 427.362 | 7729547.743 |
| M599T456_1 | 598.5575319 | 456.126 | 8335002.266 |
| M599T427_2 | 598.7867429 | 427.362 | 12755650.27 |
| M599T456_2 | 598.8073872 | 456.126 | 5055789.986 |
| M599T427_3 | 598.80364   | 427.362 | 10383968.9  |
| M599T427_4 | 599.0368122 | 427.362 | 8166379.451 |

|            |             |         |             |
|------------|-------------|---------|-------------|
| M599T164   | 599.0513184 | 163.846 | 10547264.09 |
| M599T475_1 | 599.1418453 | 475.007 | 3344656.358 |
| M599T475_2 | 599.1556072 | 475.007 | 3646427.503 |
| M599T305   | 599.1823001 | 304.777 | 763051.9931 |
| M599T106   | 599.2421104 | 105.503 | 12586025.15 |
| M599T426   | 599.2978208 | 425.909 | 5247335.43  |
| M599T451   | 599.3846988 | 450.503 | 10431426.33 |
| M600T427_1 | 599.5544721 | 427.362 | 1212252.027 |
| M600T506_1 | 599.6457234 | 505.855 | 2143462.493 |
| M600T506_2 | 599.6579087 | 505.855 | 1620463.851 |
| M600T427_2 | 599.809701  | 427.362 | 4220559.372 |
| M600T164   | 600.0567524 | 163.846 | 1649028.793 |
| M600T310   | 600.168178  | 310.075 | 1738607.087 |
| M600T482_1 | 600.2580645 | 482.436 | 2576898.493 |
| M600T531   | 600.2757584 | 531.127 | 1156981.266 |
| M600T482_2 | 600.2763451 | 482.436 | 1088518.388 |
| M600T660   | 600.2905676 | 660.455 | 3888115.317 |
| M600T456   | 600.3394425 | 456.126 | 3023860.826 |
| M600T452_1 | 600.385369  | 451.804 | 2406988.563 |
| M600T452_2 | 600.3990692 | 451.804 | 2362969.053 |
| M601T802   | 601.3308204 | 801.685 | 4588791.086 |
| M601T580   | 601.4077754 | 580.22  | 12707417.51 |
| M601T830   | 601.478131  | 830.193 | 5051469.626 |
| M601T838   | 601.4780763 | 837.524 | 3610727.489 |
| M602T459_1 | 601.5474709 | 458.985 | 3255011.132 |
| M602T459_2 | 601.5612503 | 458.985 | 2508810.605 |
| M602T459_3 | 601.7964149 | 458.985 | 4199128.432 |
| M602T459_4 | 601.8119046 | 458.985 | 3668944.279 |
| M602T306   | 602.1460788 | 306.247 | 2397275.181 |
| M602T106   | 602.2270854 | 105.503 | 103913320.7 |
| M602T688   | 602.2724518 | 687.95  | 3394934.654 |
| M602T580   | 602.4040986 | 580.22  | 3562506.493 |
| M603T500   | 603.1289401 | 500.045 | 2143981.841 |
| M603T99_1  | 603.1453676 | 98.9918 | 14521201.34 |
| M603T99_2  | 603.1570496 | 98.9918 | 13028795.73 |
| M603T266   | 603.1630767 | 265.624 | 4370483.022 |
| M603T104_1 | 603.2230827 | 104.493 | 15542606.26 |
| M603T104_2 | 603.2371237 | 104.493 | 14578059.36 |
| M603T365_1 | 603.2445375 | 365.061 | 5835723.909 |
| M603T365_2 | 603.2550673 | 365.061 | 4305675.554 |
| M603T685   | 603.269301  | 684.985 | 2582652.928 |
| M603T728_1 | 603.2866976 | 728.25  | 45366083.5  |
| M603T753   | 603.2866836 | 752.541 | 6412529.672 |
| M603T728_2 | 603.2996013 | 728.25  | 22774984.63 |
| M603T694_1 | 603.4068844 | 693.81  | 35487112.18 |
| M603T562_1 | 603.4096086 | 561.955 | 1076340922  |
| M603T605_1 | 603.4200834 | 605.264 | 26967252.53 |
| M603T669_1 | 603.4199227 | 668.867 | 18011041.21 |
| M603T682_1 | 603.4201726 | 681.885 | 23226757.12 |
| M603T545_1 | 603.4202758 | 545.203 | 130809994.3 |
| M603T694_2 | 603.4202494 | 693.81  | 275742945.3 |
| M603T562_2 | 603.4201506 | 561.955 | 2162199926  |
| M603T705   | 603.4314755 | 704.715 | 10150646.85 |
| M603T605_2 | 603.4323695 | 605.264 | 19970372.01 |

|            |              |          |              |
|------------|--------------|----------|--------------|
| M603T669_2 | 603. 432483  | 668. 867 | 9090478. 598 |
| M603T682_2 | 603. 4323082 | 681. 885 | 16315934. 53 |
| M603T562_3 | 603. 4324482 | 561. 955 | 1532274071   |
| M603T545_2 | 603. 4325754 | 545. 203 | 90726201. 22 |
| M603T694_3 | 603. 4307892 | 693. 81  | 190072660. 2 |
| M603T833   | 603. 4551791 | 833. 029 | 1564978. 603 |
| M604T261   | 603. 6523777 | 261. 177 | 6587345. 428 |
| M604T209_1 | 603. 6555575 | 208. 905 | 3010539. 528 |
| M604T530   | 603. 9897793 | 529. 713 | 880013. 8967 |
| M604T286_1 | 604. 1395462 | 285. 9   | 5588136. 932 |
| M604T264_1 | 604. 1413707 | 264. 079 | 19964867. 97 |
| M604T253   | 604. 1414941 | 253. 024 | 15855641. 44 |
| M604T176_1 | 604. 1466736 | 175. 952 | 23154886. 23 |
| M604T222_1 | 604. 1444882 | 222. 017 | 48658058. 91 |
| M604T286_2 | 604. 1518634 | 285. 9   | 21036335. 98 |
| M604T260   | 604. 1518766 | 259. 74  | 118425748. 1 |
| M604T176_2 | 604. 1603553 | 175. 952 | 27612524. 16 |
| M604T209_2 | 604. 1608282 | 208. 905 | 39465523. 24 |
| M604T222_2 | 604. 1607481 | 222. 017 | 47975907. 86 |
| M604T264_2 | 604. 1637235 | 264. 079 | 34996701. 9  |
| M604T286_3 | 604. 1647726 | 285. 9   | 9560932. 83  |
| M604T257   | 604. 1637944 | 257. 155 | 31780916. 9  |
| M604T183_1 | 604. 2293322 | 182. 574 | 19356467. 51 |
| M604T109_1 | 604. 2312089 | 108. 698 | 23337062. 97 |
| M604T197_1 | 604. 2322911 | 196. 644 | 2236930. 447 |
| M604T172   | 604. 2348419 | 171. 935 | 21252896. 77 |
| M604T163   | 604. 2438296 | 162. 728 | 19745973. 01 |
| M604T183_2 | 604. 2434525 | 182. 574 | 52212297. 48 |
| M604T123   | 604. 2436286 | 123. 262 | 9372526. 069 |
| M604T109_2 | 604. 2435893 | 108. 698 | 40291981. 03 |
| M604T197_2 | 604. 2431545 | 196. 644 | 3737814. 591 |
| M604T132   | 604. 2439113 | 131. 949 | 19206242. 02 |
| M604T148   | 604. 2437337 | 148. 117 | 19845503. 05 |
| M604T740   | 604. 292552  | 740. 014 | 3597244. 415 |
| M604T730   | 604. 2928376 | 729. 798 | 10426679. 75 |
| M604T694_1 | 604. 4143364 | 693. 81  | 49389726. 44 |
| M604T562_1 | 604. 4230088 | 561. 955 | 819743554. 8 |
| M604T545_1 | 604. 423309  | 545. 203 | 57289194. 25 |
| M604T694_2 | 604. 4336968 | 693. 81  | 79625273. 71 |
| M604T562_2 | 604. 4335747 | 561. 955 | 625791985. 4 |
| M604T545_2 | 604. 4340742 | 545. 203 | 40362954. 31 |
| M605T260   | 604. 6522076 | 259. 74  | 53463387. 44 |
| M605T110   | 604. 6517606 | 110. 047 | 3100895. 851 |
| M605T177   | 604. 651767  | 177. 295 | 11582477. 91 |
| M605T209_1 | 604. 6485655 | 208. 905 | 15219052. 97 |
| M605T223_1 | 604. 6594164 | 223. 474 | 23011837. 37 |
| M605T209_2 | 604. 6595194 | 208. 905 | 21220068. 72 |
| M605T263   | 605. 1532219 | 262. 529 | 31563871. 79 |
| M605T176   | 605. 1494112 | 175. 952 | 4826868. 075 |
| M605T223_2 | 605. 1567858 | 223. 474 | 14802315. 45 |
| M605T209_3 | 605. 1568184 | 208. 905 | 10720367. 02 |
| M605T164   | 605. 1691537 | 163. 846 | 10708314. 54 |
| M605T143_1 | 605. 1709753 | 142. 85  | 23099285. 43 |
| M605T163   | 605. 181683  | 162. 728 | 4099360. 868 |

|            |              |          |              |
|------------|--------------|----------|--------------|
| M605T143_2 | 605. 1833162 | 142. 85  | 9026960. 657 |
| M605T482   | 605. 216154  | 482. 436 | 2473434. 775 |
| M605T183   | 605. 2484584 | 182. 574 | 10611812. 95 |
| M605T458   | 605. 4105883 | 457. 576 | 3902377. 801 |
| M605T562_1 | 605. 4177663 | 561. 955 | 63899390. 51 |
| M605T649_1 | 605. 4318301 | 649. 338 | 210567759. 9 |
| M605T620_1 | 605. 4285306 | 620. 172 | 6827314. 589 |
| M605T719_1 | 605. 4317784 | 719. 215 | 34161696. 18 |
| M605T703_1 | 605. 431874  | 703. 35  | 149000813    |
| M605T632_1 | 605. 430201  | 631. 982 | 12980854. 8  |
| M605T694   | 605. 4253071 | 693. 81  | 27247039. 66 |
| M605T772_1 | 605. 4318022 | 772. 206 | 33954315. 33 |
| M605T562_2 | 605. 4284238 | 561. 955 | 198180375. 6 |
| M605T649_2 | 605. 4424243 | 649. 338 | 265763860. 2 |
| M605T562_3 | 605. 4442792 | 561. 955 | 61675183. 91 |
| M605T620_2 | 605. 4425797 | 620. 172 | 11894387. 12 |
| M605T683   | 605. 4426646 | 683. 436 | 7924781. 58  |
| M605T736   | 605. 4426475 | 735. 7   | 9407839. 796 |
| M605T719_2 | 605. 4423739 | 719. 215 | 43489818. 27 |
| M605T703_2 | 605. 442469  | 703. 35  | 191192726. 4 |
| M605T674   | 605. 4425366 | 674. 402 | 8212062. 871 |
| M605T632_2 | 605. 442529  | 631. 982 | 22579857. 11 |
| M605T772_2 | 605. 4459643 | 772. 206 | 33029121. 7  |
| M605T832   | 605. 4671936 | 831. 709 | 7539963. 566 |
| M606T257_1 | 605. 6510414 | 257. 155 | 5085325. 392 |
| M606T266_1 | 605. 650789  | 265. 624 | 3425098. 608 |
| M606T222   | 605. 6542862 | 222. 017 | 4033952. 076 |
| M606T143_1 | 605. 6685161 | 142. 85  | 7589008. 645 |
| M606T257_2 | 605. 6648974 | 257. 155 | 4836157. 927 |
| M606T266_2 | 605. 664896  | 265. 624 | 3078727. 729 |
| M606T143_2 | 605. 6826401 | 142. 85  | 6955031. 347 |
| M606T263   | 606. 1491822 | 262. 529 | 3342459. 819 |
| M606T209   | 606. 1529694 | 208. 905 | 1803327. 798 |
| M606T101   | 606. 2204314 | 101. 161 | 71034769. 52 |
| M606T744   | 606. 2792711 | 744. 182 | 4875448. 197 |
| M606T666   | 606. 2836945 | 666. 137 | 3757652. 682 |
| M606T436   | 606. 362129  | 436. 069 | 6121232. 111 |
| M606T461   | 606. 3618338 | 460. 537 | 6529609. 189 |
| M606T448   | 606. 3621123 | 447. 531 | 6430311. 876 |
| M606T522_1 | 606. 3849216 | 522. 177 | 13420405. 73 |
| M606T535_1 | 606. 3856942 | 535. 329 | 11614417. 31 |
| M606T469_1 | 606. 3887366 | 469. 252 | 25405112. 49 |
| M606T522_2 | 606. 397296  | 522. 177 | 36846824. 05 |
| M606T535_2 | 606. 3973503 | 535. 329 | 30098932. 31 |
| M606T469_2 | 606. 4043785 | 469. 252 | 29663048. 44 |
| M606T522_3 | 606. 4092331 | 522. 177 | 17298652. 32 |
| M606T535_3 | 606. 4085582 | 535. 329 | 12864444. 57 |
| M606T562   | 606. 4354857 | 561. 955 | 32458336. 41 |
| M606T703_1 | 606. 432647  | 703. 35  | 42095650. 48 |
| M606T649_1 | 606. 439616  | 649. 338 | 109634136. 9 |
| M606T703_2 | 606. 4503506 | 703. 35  | 51178173. 36 |
| M606T649_2 | 606. 4531234 | 649. 338 | 47280796. 14 |
| M607T263   | 607. 1589518 | 262. 529 | 2796186. 094 |
| M607T101_1 | 607. 2225741 | 101. 161 | 15228963. 4  |

|            |              |          |              |
|------------|--------------|----------|--------------|
| M607T101_2 | 607. 2376836 | 101. 161 | 5757718. 811 |
| M607T325   | 607. 2350365 | 325. 35  | 19912079. 56 |
| M607T334   | 607. 2483598 | 333. 715 | 9147316. 335 |
| M607T744   | 607. 2903471 | 744. 182 | 2581536. 881 |
| M607T436   | 607. 3595604 | 436. 069 | 1320590. 889 |
| M607T461   | 607. 3613154 | 460. 537 | 1549616. 953 |
| M607T548_1 | 607. 3614785 | 548. 114 | 4428695. 07  |
| M607T548_2 | 607. 3721233 | 548. 114 | 2994524. 429 |
| M607T522   | 607. 39347   | 522. 177 | 8130515. 583 |
| M607T469_1 | 607. 3936142 | 469. 252 | 8827081. 423 |
| M607T469_2 | 607. 4077504 | 469. 252 | 10711128. 26 |
| M607T649_1 | 607. 439384  | 649. 338 | 19281857. 1  |
| M607T703   | 607. 4497565 | 703. 35  | 16438453. 57 |
| M607T649_2 | 607. 4535779 | 649. 338 | 14935932. 66 |
| M608T659_1 | 608. 2672481 | 658. 953 | 33978485. 01 |
| M608T659_2 | 608. 2814755 | 658. 953 | 33760318. 84 |
| M608T799_1 | 608. 2994221 | 799. 089 | 7946132. 255 |
| M608T799_2 | 608. 3118554 | 799. 089 | 3937687. 813 |
| M608T557   | 608. 3705891 | 556. 816 | 3459650. 365 |
| M608T497   | 608. 3708617 | 497. 214 | 3662021. 066 |
| M608T463   | 608. 3710683 | 463. 271 | 6309481. 517 |
| M608T506   | 608. 3826756 | 505. 855 | 4750865. 676 |
| M608T484   | 608. 4188103 | 483. 973 | 949696. 0605 |
| M609T659_1 | 608. 76917   | 658. 953 | 22661812. 85 |
| M609T659_2 | 608. 7834097 | 658. 953 | 23431799. 38 |
| M609T659_3 | 609. 2701394 | 658. 953 | 7717083. 542 |
| M609T659_4 | 609. 2832786 | 658. 953 | 10819182. 34 |
| M609T746   | 609. 307605  | 745. 603 | 12561006. 48 |
| M610T474   | 610. 392701  | 473. 597 | 2161856. 618 |
| M610T449   | 610. 3980768 | 448. 978 | 1169008. 719 |
| M611T158   | 611. 1552646 | 157. 773 | 13742345. 3  |
| M612T158   | 611. 6535164 | 157. 773 | 9386428. 958 |
| M612T106_1 | 612. 2059538 | 105. 503 | 11144123. 46 |
| M612T304   | 612. 2097777 | 303. 513 | 2805150. 729 |
| M612T191   | 612. 2169135 | 190. 962 | 1374850. 66  |
| M612T106_2 | 612. 216715  | 105. 503 | 10107031. 3  |
| M612T371   | 612. 2274378 | 370. 777 | 10864224. 63 |
| M612T743   | 612. 2425691 | 742. 68  | 5215009. 13  |
| M612T485   | 612. 3098512 | 485. 471 | 3596229. 221 |
| M612T741   | 612. 3286503 | 741. 302 | 15092004. 56 |
| M613T485   | 612. 8245444 | 485. 471 | 1207263. 053 |
| M613T143   | 613. 1589008 | 142. 85  | 6321749. 835 |
| M613T649   | 613. 1955817 | 649. 338 | 8241844. 176 |
| M613T282_1 | 613. 2381252 | 281. 666 | 3204453. 266 |
| M613T282_2 | 613. 2489286 | 281. 666 | 2325504. 638 |
| M613T313   | 613. 2525577 | 312. 85  | 3986410. 113 |
| M613T799   | 613. 2559394 | 799. 089 | 7486848. 819 |
| M613T604   | 613. 3352913 | 603. 95  | 969213. 7013 |
| M614T471   | 613. 8248544 | 470. 602 | 712058. 6101 |
| M614T101   | 614. 1751059 | 101. 161 | 15793460. 2  |
| M614T100   | 614. 1882792 | 100. 146 | 5688757. 7   |
| M614T107   | 614. 2216717 | 106. 513 | 23875414. 53 |
| M614T163   | 614. 2258273 | 162. 728 | 9847828. 781 |
| M614T746_1 | 614. 2586106 | 745. 603 | 18204480. 44 |

|            |              |          |              |
|------------|--------------|----------|--------------|
| M614T746_2 | 614. 2694777 | 745. 603 | 14720604. 19 |
| M614T484   | 614. 3577862 | 483. 973 | 2247668. 592 |
| M615T101   | 614. 6768387 | 101. 161 | 9048725. 977 |
| M615T567   | 614. 800029  | 567. 1   | 6907213. 258 |
| M615T165_1 | 615. 0247196 | 165. 217 | 28416774. 55 |
| M615T165_2 | 615. 0391767 | 165. 217 | 32629545. 2  |
| M615T443_1 | 615. 126201  | 443. 256 | 6110799. 912 |
| M615T263   | 615. 1401097 | 262. 529 | 6910448. 734 |
| M615T443_2 | 615. 1442334 | 443. 256 | 10664750. 29 |
| M616T261   | 615. 6393499 | 261. 177 | 2226016. 643 |
| M616T310   | 616. 2049193 | 310. 075 | 2621306. 965 |
| M616T302   | 616. 2514957 | 302. 191 | 4608436. 715 |
| M616T107   | 616. 2483021 | 106. 513 | 7298309. 54  |
| M616T666   | 616. 2597811 | 666. 137 | 2292698. 684 |
| M616T657   | 616. 2597019 | 657. 451 | 3979608. 948 |
| M616T834   | 616. 3427277 | 834. 486 | 943237. 0122 |
| M617T655_1 | 616. 7601201 | 654. 542 | 2531121. 885 |
| M617T668_1 | 617. 272781  | 667. 609 | 34500571. 63 |
| M617T655_2 | 617. 2724905 | 654. 542 | 131331807    |
| M617T668_2 | 617. 2873203 | 667. 609 | 33083063. 41 |
| M617T655_3 | 617. 2870344 | 654. 542 | 131106181. 6 |
| M618T666_1 | 617. 7783397 | 666. 137 | 29118082. 67 |
| M618T655_1 | 617. 7781731 | 654. 542 | 108980114. 3 |
| M618T666_2 | 617. 7892609 | 666. 137 | 20918078. 36 |
| M618T655_2 | 617. 7890942 | 654. 542 | 79452080. 34 |
| M618T260   | 618. 1323633 | 259. 74  | 9075522. 258 |
| M618T309_1 | 618. 2444168 | 308. 967 | 28680740. 4  |
| M618T246   | 618. 25554   | 246. 372 | 7400420. 655 |
| M618T309_2 | 618. 2553479 | 308. 967 | 106689436. 1 |
| M618T309_3 | 618. 2699238 | 308. 967 | 35750708. 42 |
| M618T666_3 | 618. 2736679 | 666. 137 | 7150284. 141 |
| M618T653_1 | 618. 2735839 | 653. 147 | 26108501. 17 |
| M618T666_4 | 618. 2845968 | 666. 137 | 12139194. 24 |
| M618T653_2 | 618. 2845203 | 653. 147 | 45965040. 36 |
| M619T475   | 619. 1316135 | 475. 007 | 7682391. 744 |
| M619T620_1 | 619. 1971109 | 620. 172 | 7057045. 382 |
| M619T632_1 | 619. 2005309 | 631. 982 | 14908447. 68 |
| M619T96_1  | 619. 2117331 | 95. 7572 | 66818019. 33 |
| M619T620_2 | 619. 2151843 | 620. 172 | 6166362. 848 |
| M619T632_2 | 619. 2153805 | 631. 982 | 7799771. 494 |
| M619T96_2  | 619. 225948  | 95. 7572 | 37870798. 88 |
| M619T310   | 619. 2388258 | 310. 075 | 1036610. 675 |
| M619T309_1 | 619. 2589075 | 308. 967 | 27695084. 33 |
| M619T309_2 | 619. 2724452 | 308. 967 | 9829501. 106 |
| M619T537   | 619. 2736487 | 536. 761 | 1039420. 539 |
| M619T783_1 | 619. 3759144 | 782. 558 | 1479926. 21  |
| M619T783_2 | 619. 3868857 | 782. 558 | 1180789. 642 |
| M619T622_1 | 619. 401925  | 621. 708 | 6936079. 931 |
| M619T462_1 | 619. 4124997 | 461. 845 | 68511119. 7  |
| M619T622_2 | 619. 4128602 | 621. 708 | 42353652. 33 |
| M619T580_1 | 619. 416348  | 580. 22  | 17106230. 11 |
| M619T462_2 | 619. 4271147 | 461. 845 | 49886051. 25 |
| M619T622_3 | 619. 4344499 | 621. 708 | 5567761. 585 |
| M619T580_2 | 619. 4283821 | 580. 22  | 9909218. 922 |



|            |              |          |              |
|------------|--------------|----------|--------------|
| M620T515_1 | 619. 8293882 | 514. 727 | 5845526. 233 |
| M620T515_2 | 619. 8476857 | 514. 727 | 5767431. 987 |
| M620T477   | 620. 1360518 | 476. 554 | 1713557. 082 |
| M620T97    | 620. 1990429 | 96. 7698 | 12826612. 85 |
| M620T309   | 620. 2613959 | 308. 967 | 5778023. 954 |
| M620T462_1 | 620. 4078921 | 461. 845 | 7798380. 246 |
| M620T622_1 | 620. 4118079 | 621. 708 | 11044146. 9  |
| M620T462_2 | 620. 4188691 | 461. 845 | 31723438. 79 |
| M620T622_2 | 620. 4299522 | 621. 708 | 12169153. 47 |
| M620T462_3 | 620. 4298547 | 461. 845 | 21533356. 44 |
| M621T163   | 620. 9986197 | 162. 728 | 7904921. 515 |
| M621T770   | 621. 2991536 | 769. 702 | 1361737. 624 |
| M621T730   | 621. 2992764 | 729. 798 | 53674877. 61 |
| M621T764   | 621. 3099688 | 763. 856 | 1359130. 101 |
| M621T475_1 | 621. 3085017 | 475. 007 | 1533899. 046 |
| M621T482   | 621. 3090126 | 482. 436 | 3131212. 598 |
| M621T757   | 621. 3102369 | 757. 001 | 2577460. 401 |
| M621T728   | 621. 320233  | 728. 25  | 1798981. 243 |
| M621T718   | 621. 3212606 | 717. 959 | 2008575. 821 |
| M621T737   | 621. 320689  | 737. 198 | 719982. 59   |
| M621T475_2 | 621. 3382421 | 475. 007 | 16814337. 94 |
| M621T462   | 621. 4169905 | 461. 845 | 4827408. 499 |
| M621T682_1 | 621. 4225114 | 681. 885 | 7802303. 879 |
| M621T622   | 621. 4248134 | 621. 708 | 7761045. 813 |
| M621T605_1 | 621. 4277576 | 605. 264 | 15125866. 09 |
| M621T562_1 | 621. 4278536 | 561. 955 | 1147805408   |
| M621T545_1 | 621. 4280653 | 545. 203 | 68185283. 93 |
| M621T694_1 | 621. 4229183 | 693. 81  | 103004594. 1 |
| M621T682_2 | 621. 4351467 | 681. 885 | 14290459. 33 |
| M621T605_2 | 621. 4424509 | 605. 264 | 11119457. 75 |
| M621T562_2 | 621. 4425398 | 561. 955 | 796868771. 9 |
| M621T545_2 | 621. 4426258 | 545. 203 | 46144736. 8  |
| M621T694_2 | 621. 4353247 | 693. 81  | 175551806. 5 |
| M621T694_3 | 621. 4518334 | 693. 81  | 21240669. 57 |
| M622T142   | 622. 2513473 | 141. 825 | 8604478. 682 |
| M622T109   | 622. 251452  | 108. 698 | 46146556. 92 |
| M622T32_1  | 622. 2479396 | 32. 4171 | 3514748. 45  |
| M622T121   | 622. 2611507 | 120. 525 | 11790540. 9  |
| M622T32_2  | 622. 2656187 | 32. 4171 | 2845428. 694 |
| M622T728   | 622. 2988721 | 728. 25  | 13862703. 05 |
| M622T475   | 622. 3401976 | 475. 007 | 1649463. 127 |
| M622T509   | 622. 3877997 | 508. 883 | 10915873. 01 |
| M622T562_1 | 622. 4281529 | 561. 955 | 321677997. 5 |
| M622T694_1 | 622. 428336  | 693. 81  | 44641762. 52 |
| M622T562_2 | 622. 4465548 | 561. 955 | 282416187. 5 |
| M622T694_2 | 622. 4467332 | 693. 81  | 37837775. 9  |
| M623T261   | 623. 1204295 | 261. 177 | 5793231. 768 |
| M623T266   | 623. 1317124 | 265. 624 | 3017689. 694 |
| M623T109_1 | 623. 2501829 | 108. 698 | 8348196. 52  |
| M623T109_2 | 623. 2617965 | 108. 698 | 8343894. 908 |
| M623T562_1 | 623. 4344333 | 561. 955 | 106693157. 4 |
| M623T702   | 623. 4546278 | 702. 055 | 3440250. 27  |
| M623T562_2 | 623. 4486935 | 561. 955 | 71346541. 65 |
| M624T601   | 624. 2614645 | 601. 04  | 9210121. 945 |

|            |              |          |              |
|------------|--------------|----------|--------------|
| M624T595   | 624. 2881406 | 595. 066 | 4897323. 304 |
| M625T117   | 625. 1057704 | 116. 689 | 5022658. 281 |
| M625T644   | 625. 2450356 | 643. 727 | 1120002. 431 |
| M625T88_1  | 625. 2466251 | 87. 6739 | 21172822. 81 |
| M625T311   | 625. 2503364 | 311. 445 | 2206089. 513 |
| M625T103   | 625. 2507599 | 103. 423 | 19763558. 23 |
| M625T88_2  | 625. 2595864 | 87. 6739 | 16375762. 13 |
| M625T668   | 625. 2664894 | 667. 609 | 3140505. 652 |
| M625T685   | 625. 2764205 | 684. 985 | 4720803. 29  |
| M625T577   | 625. 2845845 | 577. 366 | 6116641. 54  |
| M625T830   | 625. 3132157 | 830. 193 | 1944129. 315 |
| M626T576   | 625. 7735698 | 575. 878 | 3751432. 432 |
| M626T577   | 625. 7847043 | 577. 366 | 5094097. 7   |
| M626T309   | 626. 2338376 | 308. 967 | 2821063. 148 |
| M626T762   | 626. 4011685 | 762. 439 | 1611840. 157 |
| M627T82    | 626. 6838515 | 82. 0569 | 15567561. 4  |
| M627T518_1 | 626. 8363745 | 517. 762 | 7038138. 655 |
| M627T518_2 | 626. 8549812 | 517. 762 | 8085964. 123 |
| M627T744   | 627. 216031  | 744. 182 | 2063537. 101 |
| M627T605   | 627. 3500894 | 605. 264 | 4330728. 818 |
| M628T485   | 627. 8177164 | 485. 471 | 1259009. 243 |
| M628T605   | 628. 360924  | 605. 264 | 1054104. 725 |
| M628T703   | 628. 4475719 | 703. 35  | 6130417. 198 |
| M628T649   | 628. 4544006 | 649. 338 | 2188379. 387 |
| M628T773   | 628. 4667003 | 773. 437 | 1015184. 136 |
| M629T163   | 629. 2324637 | 162. 728 | 1649881. 87  |
| M629T154_1 | 629. 2323784 | 153. 785 | 7886855. 868 |
| M629T106   | 629. 239458  | 105. 503 | 6878417. 67  |
| M629T154_2 | 629. 2436043 | 153. 785 | 6936736. 623 |
| M629T577_1 | 629. 3215153 | 577. 366 | 2896516. 208 |
| M629T577_2 | 629. 3353641 | 577. 366 | 1755473. 765 |
| M629T614_1 | 629. 4268028 | 614. 215 | 4497882. 252 |
| M629T614_2 | 629. 4417809 | 614. 215 | 2607381. 094 |
| M629T772_1 | 629. 4529746 | 772. 206 | 3101227. 89  |
| M629T702   | 629. 4643448 | 702. 055 | 2340113. 574 |
| M629T772_2 | 629. 4669164 | 772. 206 | 1780863. 036 |
| M631T164   | 631. 002457  | 163. 846 | 6399886. 464 |
| M631T297   | 631. 2019386 | 296. 739 | 8220608. 621 |
| M631T310   | 631. 2099932 | 310. 075 | 5097271. 601 |
| M631T829   | 631. 4872101 | 828. 73  | 6966093. 353 |
| M632T104   | 632. 23225   | 104. 493 | 17977477     |
| M632T597   | 632. 2667482 | 596. 628 | 67919956. 05 |
| M633T597   | 632. 7836806 | 596. 628 | 6081321. 631 |
| M633T527   | 632. 9986695 | 526. 676 | 1321827. 055 |
| M633T425   | 633. 1941862 | 424. 572 | 1086543. 377 |
| M633T537   | 633. 2744391 | 536. 761 | 665345. 0695 |
| M634T597   | 633. 7697674 | 596. 628 | 4819195. 695 |
| M634T543_1 | 633. 8225896 | 542. 766 | 4068918. 246 |
| M634T543_2 | 633. 8381103 | 542. 766 | 2797015. 982 |
| M634T102_1 | 634. 2087473 | 102. 247 | 23971733. 38 |
| M634T102_2 | 634. 223301  | 102. 247 | 21690609. 85 |
| M634T744   | 634. 3191949 | 744. 182 | 4356662. 237 |
| M635T102   | 635. 2209057 | 102. 247 | 5295080. 729 |
| M635T451   | 635. 3609225 | 450. 503 | 1320440. 297 |

|            |              |          |              |
|------------|--------------|----------|--------------|
| M635T595   | 635. 3769459 | 595. 066 | 7000918. 932 |
| M635T502_1 | 635. 4067501 | 501. 549 | 12991482. 69 |
| M635T502_2 | 635. 4224964 | 501. 549 | 9088815. 684 |
| M636T219   | 636. 2171281 | 219. 233 | 11075605. 14 |
| M636T538   | 636. 3390396 | 538. 316 | 1541874. 132 |
| M636T503   | 636. 4150792 | 503. 046 | 9087643. 558 |
| M637T463   | 637. 0164841 | 463. 271 | 1047810. 421 |
| M637T443_1 | 637. 1132081 | 443. 256 | 3697332. 966 |
| M637T443_2 | 637. 1274144 | 443. 256 | 2944821. 443 |
| M637T475_1 | 637. 4208269 | 475. 007 | 6376016. 79  |
| M637T465_1 | 637. 4210355 | 464. 668 | 19156987. 96 |
| M637T558   | 637. 4290411 | 557. 967 | 11564457. 3  |
| M637T475_2 | 637. 4364501 | 475. 007 | 6798999. 561 |
| M637T465_2 | 637. 4365588 | 464. 668 | 19487846. 8  |
| M637T557   | 637. 4404164 | 556. 816 | 4519876. 09  |
| M638T509   | 638. 3201516 | 508. 883 | 13116595. 51 |
| M638T558_1 | 638. 4293946 | 557. 967 | 4851601. 672 |
| M638T475_1 | 638. 4252153 | 475. 007 | 2661534. 07  |
| M638T465_1 | 638. 425495  | 464. 668 | 9001920. 531 |
| M638T558_2 | 638. 4408819 | 557. 967 | 2915725. 164 |
| M638T475_2 | 638. 4405121 | 475. 007 | 2121347. 051 |
| M638T465_2 | 638. 4409691 | 464. 668 | 6512014. 58  |
| M639T234   | 638. 693277  | 234. 447 | 2287493. 474 |
| M639T516   | 638. 7995257 | 516. 214 | 2840590. 116 |
| M639T509   | 638. 8232142 | 508. 883 | 3987588. 619 |
| M639T233   | 639. 1949034 | 233. 081 | 804113. 5435 |
| M639T562   | 639. 4403255 | 561. 955 | 13965809. 78 |
| M639T468_1 | 639. 4439998 | 467. 706 | 25903604. 19 |
| M639T468_2 | 639. 4559576 | 467. 706 | 10527272. 29 |
| M640T535   | 639. 6434771 | 535. 329 | 1386614. 714 |
| M640T631   | 640. 2846453 | 630. 507 | 54629575. 5  |
| M640T645   | 640. 3000023 | 645. 278 | 73741018. 2  |
| M640T620_1 | 640. 3000373 | 620. 172 | 116284722. 5 |
| M640T632   | 640. 2998168 | 631. 982 | 137514778. 9 |
| M640T644   | 640. 31542   | 643. 727 | 18356622. 59 |
| M640T620_2 | 640. 3165116 | 620. 172 | 22110198     |
| M640T824   | 640. 3425227 | 824. 311 | 6003307. 058 |
| M640T562   | 640. 4493661 | 561. 955 | 4119986. 112 |
| M641T622   | 640. 8186007 | 621. 708 | 13619019. 71 |
| M641T118_1 | 641. 0843905 | 118. 116 | 44950716. 29 |
| M641T118_2 | 641. 0959321 | 118. 116 | 31988981. 79 |
| M641T662   | 641. 1455855 | 661. 979 | 2249651. 383 |
| M641T660   | 641. 1594145 | 660. 455 | 3037439. 136 |
| M641T534_1 | 641. 3360477 | 533. 958 | 5277655. 823 |
| M641T534_2 | 641. 3499718 | 533. 958 | 11983903. 2  |
| M641T824   | 641. 3510269 | 824. 311 | 1157813. 265 |
| M641T468   | 641. 4580208 | 467. 706 | 1613074. 228 |
| M642T534_1 | 641. 6888384 | 533. 958 | 4993919. 623 |
| M642T595   | 641. 7497122 | 595. 066 | 1476337. 646 |
| M642T597   | 641. 7629156 | 596. 628 | 1323888. 409 |
| M642T534_2 | 642. 016397  | 533. 958 | 2025861. 85  |
| M642T118_1 | 642. 0846332 | 118. 116 | 7677122. 338 |
| M642T118_2 | 642. 0972531 | 118. 116 | 7065563. 762 |
| M642T739   | 642. 3365283 | 738. 697 | 871033. 3137 |

|            |              |          |              |
|------------|--------------|----------|--------------|
| M642T753   | 642. 3598157 | 752. 541 | 2310741. 312 |
| M643T524   | 642. 8115221 | 523. 735 | 14465925. 38 |
| M643T477   | 643. 0743636 | 476. 554 | 1650239. 938 |
| M643T89    | 643. 2608863 | 88. 6838 | 50320195. 41 |
| M643T728_1 | 643. 2761053 | 728. 25  | 8103889. 456 |
| M643T728_2 | 643. 2881376 | 728. 25  | 5837425. 484 |
| M643T452   | 643. 3379437 | 451. 804 | 22827526. 37 |
| M643T607   | 643. 3413243 | 606. 774 | 785835. 403  |
| M643T563   | 643. 4110792 | 563. 297 | 9591930. 981 |
| M643T636   | 643. 4538923 | 636. 473 | 1915073. 775 |
| M644T524_1 | 643. 8008152 | 523. 735 | 1645794. 834 |
| M644T524_2 | 643. 8150716 | 523. 735 | 3340580. 848 |
| M644T104   | 644. 2400309 | 104. 493 | 5266083. 241 |
| M644T409_1 | 644. 3180428 | 409. 271 | 8293502. 166 |
| M644T453   | 644. 3332414 | 453. 317 | 4174935. 816 |
| M644T409_2 | 644. 3296738 | 409. 271 | 6825518. 508 |
| M644T452   | 644. 3526145 | 451. 804 | 1874430. 157 |
| M644T695   | 644. 4347967 | 695. 155 | 3370612. 701 |
| M644T562_1 | 644. 445775  | 561. 955 | 130926653. 5 |
| M644T787_1 | 644. 4417955 | 786. 569 | 1469212. 997 |
| M644T562_2 | 644. 4574052 | 561. 955 | 95558720. 23 |
| M644T787_2 | 644. 4552515 | 786. 569 | 1145563. 779 |
| M645T607_1 | 645. 2649391 | 606. 774 | 3695742. 222 |
| M645T741   | 645. 4192633 | 741. 302 | 5509979. 928 |
| M645T607_2 | 645. 4232037 | 606. 774 | 5946905. 444 |
| M645T563_1 | 645. 4477602 | 563. 297 | 51846111. 72 |
| M645T563_2 | 645. 4594211 | 563. 297 | 45183723. 86 |
| M646T435_1 | 645. 6529135 | 434. 589 | 1665524. 959 |
| M646T435_2 | 645. 665745  | 434. 589 | 3043454. 901 |
| M646T480_1 | 645. 7945833 | 479. 527 | 2431004. 778 |
| M646T106   | 646. 2135127 | 105. 503 | 5706525. 752 |
| M646T374   | 646. 2983777 | 373. 532 | 745528. 7143 |
| M646T487   | 646. 2947916 | 486. 885 | 1091003. 325 |
| M646T480_2 | 646. 3160081 | 479. 527 | 3789043. 112 |
| M646T607   | 646. 4282119 | 606. 774 | 3612224. 899 |
| M646T740   | 646. 4440623 | 740. 014 | 7693745. 056 |
| M646T562   | 646. 4520097 | 561. 955 | 9975089. 561 |
| M646T583   | 646. 4754452 | 583. 068 | 1705811. 076 |
| M647T522   | 646. 849673  | 522. 177 | 5071902. 085 |
| M647T741_1 | 647. 4323652 | 741. 302 | 1493583. 347 |
| M647T527   | 647. 4467314 | 526. 676 | 1018513. 822 |
| M647T741_2 | 647. 4469149 | 741. 302 | 1656228. 017 |
| M648T199   | 648. 1694805 | 199. 43  | 951704. 8167 |
| M648T104   | 648. 2362342 | 104. 493 | 19310662. 71 |
| M648T329   | 648. 2443065 | 329. 481 | 3071930. 079 |
| M648T632   | 648. 2790012 | 631. 982 | 5751169. 339 |
| M648T713_1 | 648. 3697881 | 713. 464 | 1722691. 316 |
| M648T713_2 | 648. 3853419 | 713. 464 | 2502866. 104 |
| M649T826   | 648. 6281484 | 825. 74  | 7998124. 889 |
| M649T490   | 648. 846057  | 489. 826 | 602711. 1221 |
| M649T180_1 | 649. 2026766 | 179. 75  | 166590787. 5 |
| M649T106_1 | 649. 2023118 | 105. 503 | 161741731. 9 |
| M649T291_1 | 649. 1993827 | 291. 307 | 91168637. 47 |
| M649T95_1  | 649. 2023371 | 94. 7467 | 210285732. 3 |

|            |             |         |             |
|------------|-------------|---------|-------------|
| M649T276_1 | 649.2024349 | 276.414 | 12283497.26 |
| M649T649_1 | 649.2081712 | 649.338 | 314848294.1 |
| M649T246_1 | 649.2028342 | 246.372 | 8283063.912 |
| M649T267_1 | 649.2032066 | 267.171 | 6978339.389 |
| M649T620_1 | 649.2082789 | 620.172 | 10541042.02 |
| M649T632_1 | 649.2082101 | 631.982 | 21364848.84 |
| M649T256_1 | 649.2029577 | 255.723 | 6244100.967 |
| M649T313   | 649.203161  | 312.85  | 7719550.045 |
| M649T234_1 | 649.2028691 | 234.447 | 8047147.951 |
| M649T159   | 649.2161881 | 159.017 | 57918725.8  |
| M649T223   | 649.2163958 | 223.474 | 29613032.51 |
| M649T180_2 | 649.2165806 | 179.75  | 57217059.32 |
| M649T106_2 | 649.2160374 | 105.503 | 352008672.1 |
| M649T291_2 | 649.2163998 | 291.307 | 190782389.2 |
| M649T143_1 | 649.2159832 | 142.85  | 49643822.52 |
| M649T172   | 649.2163622 | 171.935 | 51298834.41 |
| M649T95_2  | 649.2160631 | 94.7467 | 457151670.3 |
| M649T123   | 649.2163124 | 123.262 | 51816497.99 |
| M649T201   | 649.2162883 | 200.766 | 30836765.6  |
| M649T188_1 | 649.2161424 | 188.126 | 46068670.92 |
| M649T209   | 649.2162546 | 208.905 | 34511022.91 |
| M649T276_2 | 649.2161592 | 276.414 | 19925656.56 |
| M649T314   | 649.2164518 | 314.259 | 17660360.88 |
| M649T649_2 | 649.2238555 | 649.338 | 298174125.6 |
| M649T246_2 | 649.2162173 | 246.372 | 17620164.75 |
| M649T267_2 | 649.2160927 | 267.171 | 14922227.97 |
| M649T620_2 | 649.2239393 | 620.172 | 10068261.66 |
| M649T632_2 | 649.2238977 | 631.982 | 20348296.21 |
| M649T256_2 | 649.2163982 | 255.723 | 13032582.13 |
| M649T234_2 | 649.2162906 | 234.447 | 17338533.2  |
| M649T106_3 | 649.2301107 | 105.503 | 134825026.6 |
| M649T291_3 | 649.2310667 | 291.307 | 68442839.67 |
| M649T143_2 | 649.227706  | 142.85  | 18548591.41 |
| M649T95_3  | 649.2278286 | 94.7467 | 182771944.2 |
| M649T188_2 | 649.227902  | 188.126 | 17588459.58 |
| M649T234_3 | 649.2279498 | 234.447 | 6369635.757 |
| M649T474   | 649.3250439 | 473.597 | 3931946.414 |
| M649T604   | 649.3528919 | 603.95  | 5763154.904 |
| M649T595   | 649.3956285 | 595.066 | 1166186.167 |
| M650T291_1 | 650.2059363 | 291.307 | 18093958.65 |
| M650T95_1  | 650.204713  | 94.7467 | 58040312.62 |
| M650T180_1 | 650.2098814 | 179.75  | 11329853.59 |
| M650T649_1 | 650.2128878 | 649.338 | 98233336.98 |
| M650T143_1 | 650.2097735 | 142.85  | 7575867.724 |
| M650T172_1 | 650.2107636 | 171.935 | 8612439.488 |
| M650T106_1 | 650.2174943 | 105.503 | 98311029.95 |
| M650T291_2 | 650.2177292 | 291.307 | 54057303.18 |
| M650T95_2  | 650.2171101 | 94.7467 | 123042288.1 |
| M650T180_2 | 650.2255959 | 179.75  | 13710628.18 |
| M650T649_2 | 650.2252028 | 649.338 | 96917566.05 |
| M650T143_2 | 650.2254919 | 142.85  | 10201957.02 |
| M650T172_2 | 650.2254053 | 171.935 | 10681597.39 |
| M650T632   | 650.2256974 | 631.982 | 5621229.121 |
| M650T106_2 | 650.2331123 | 105.503 | 29166679.36 |

|            |              |          |              |
|------------|--------------|----------|--------------|
| M650T291_3 | 650. 2335151 | 291. 307 | 28086898. 51 |
| M650T92_1  | 650. 2370211 | 91. 7174 | 51277980. 65 |
| M650T103   | 650. 2524355 | 103. 423 | 9967813. 505 |
| M650T92_2  | 650. 2527541 | 91. 7174 | 57227749. 27 |
| M650T604   | 650. 3567334 | 603. 95  | 1555096. 646 |
| M651T487   | 650. 7939459 | 486. 885 | 1358508. 51  |
| M651T649_1 | 651. 2128709 | 649. 338 | 20489061. 14 |
| M651T106_1 | 651. 2167978 | 105. 503 | 24094735. 55 |
| M651T291_1 | 651. 2176907 | 291. 307 | 12805142. 08 |
| M651T95_1  | 651. 2166814 | 94. 7467 | 29303618. 02 |
| M651T649_2 | 651. 2286292 | 649. 338 | 21966449. 65 |
| M651T106_2 | 651. 2286236 | 105. 503 | 19575646. 12 |
| M651T291_2 | 651. 2305321 | 291. 307 | 5609469. 018 |
| M651T95_2  | 651. 2284645 | 94. 7467 | 21505834. 89 |
| M651T93    | 651. 2478361 | 92. 7272 | 13126464. 78 |
| M651T665   | 651. 2711168 | 664. 745 | 7985697. 286 |
| M651T577   | 651. 3031798 | 577. 366 | 1112708. 075 |
| M651T777   | 651. 3755148 | 777. 245 | 8572772. 659 |
| M652T665_1 | 651. 7716607 | 664. 745 | 4519783. 565 |
| M652T665_2 | 651. 784445  | 664. 745 | 3609645. 373 |
| M652T649   | 652. 2182678 | 649. 338 | 3315328. 135 |
| M652T291   | 652. 2218541 | 291. 307 | 1323272. 778 |
| M652T343_1 | 652. 2392815 | 343. 226 | 25520607. 81 |
| M652T343_2 | 652. 2530715 | 343. 226 | 9451238. 291 |
| M652T515_1 | 652. 4021941 | 514. 727 | 1767695. 104 |
| M652T515_2 | 652. 4165719 | 514. 727 | 1641733. 767 |
| M653T540   | 652. 6610801 | 539. 764 | 2389587. 791 |
| M653T310   | 653. 179646  | 310. 075 | 1884927. 726 |
| M653T299   | 653. 1793949 | 299. 493 | 2774667. 908 |
| M653T301   | 653. 1918025 | 300. 782 | 7129417. 449 |
| M653T343_1 | 653. 238893  | 343. 226 | 6853526. 027 |
| M653T343_2 | 653. 2507487 | 343. 226 | 7092833. 618 |
| M653T617_1 | 653. 2708978 | 617. 133 | 40620928. 84 |
| M653T617_2 | 653. 2827969 | 617. 133 | 20045748. 07 |
| M653T595_1 | 653. 3735612 | 595. 066 | 10636890     |
| M653T595_2 | 653. 3854266 | 595. 066 | 26554803. 88 |
| M653T595_3 | 653. 4002792 | 595. 066 | 6019305. 824 |
| M653T838   | 653. 4615677 | 837. 524 | 2200649. 546 |
| M653T832   | 653. 4687783 | 831. 709 | 8691564. 555 |
| M653T823   | 653. 4685662 | 822. 881 | 5826730. 982 |
| M654T601   | 653. 7617893 | 601. 04  | 8082392. 941 |
| M654T617   | 653. 7857826 | 617. 133 | 10230133. 64 |
| M654T469_1 | 654. 2898012 | 469. 252 | 1131126. 591 |
| M654T469_2 | 654. 3037172 | 469. 252 | 1073316. 655 |
| M654T597_1 | 654. 3842548 | 596. 628 | 7086149. 812 |
| M654T597_2 | 654. 4000055 | 596. 628 | 2894951. 995 |
| M654T824   | 654. 4797905 | 824. 311 | 2246740. 46  |
| M655T616_1 | 655. 288604  | 615. 594 | 3019071. 277 |
| M655T638_1 | 655. 2987971 | 637. 996 | 11556270. 43 |
| M655T628_1 | 655. 298537  | 627. 58  | 9738809. 029 |
| M655T638_2 | 655. 3147062 | 637. 996 | 9780709. 271 |
| M655T616_2 | 655. 3086201 | 615. 594 | 28890008. 59 |
| M655T628_2 | 655. 3145416 | 627. 58  | 8553798. 184 |
| M655T577   | 655. 3350639 | 577. 366 | 1798874. 503 |

|            |              |          |              |
|------------|--------------|----------|--------------|
| M655T516   | 655. 3500106 | 516. 214 | 91676042. 79 |
| M655T420_1 | 655. 4296622 | 420. 274 | 47558460. 83 |
| M655T597_1 | 655. 4335567 | 596. 628 | 11721435. 68 |
| M655T420_2 | 655. 4415947 | 420. 274 | 75891592. 09 |
| M655T597_2 | 655. 4455927 | 596. 628 | 10663373. 85 |
| M655T420_3 | 655. 4535241 | 420. 274 | 20979174. 46 |
| M655T676   | 655. 4515925 | 675. 866 | 4140158. 84  |
| M656T616_1 | 655. 8039281 | 615. 594 | 18731804. 35 |
| M656T616_2 | 655. 8188741 | 615. 594 | 7736515. 816 |
| M656T518   | 655. 8771058 | 517. 762 | 1202859. 558 |
| M656T478_1 | 656. 3298055 | 477. 989 | 18498535. 69 |
| M656T478_2 | 656. 3417594 | 477. 989 | 93835911. 03 |
| M656T516   | 656. 3694959 | 516. 214 | 17354950. 49 |
| M656T660   | 656. 4123956 | 660. 455 | 1932260. 527 |
| M656T676   | 656. 4453615 | 675. 866 | 6648742. 599 |
| M657T478_1 | 656. 8311514 | 477. 989 | 12300995. 3  |
| M657T485_1 | 656. 8321381 | 485. 471 | 9928880. 336 |
| M657T478_2 | 656. 8445157 | 477. 989 | 71323074. 08 |
| M657T478_3 | 656. 859853  | 477. 989 | 26772175. 06 |
| M657T117_1 | 657. 0528931 | 116. 689 | 11894352. 47 |
| M657T117_2 | 657. 0678036 | 116. 689 | 11731580. 74 |
| M657T135   | 657. 0677337 | 134. 574 | 2617598. 317 |
| M657T485_2 | 657. 3362027 | 485. 471 | 6827826. 042 |
| M657T478_4 | 657. 3478699 | 477. 989 | 30137313. 29 |
| M658T485   | 657. 8318049 | 485. 471 | 1660356. 224 |
| M658T32_1  | 658. 225082  | 32. 4171 | 362890. 834  |
| M658T32_2  | 658. 2381662 | 32. 4171 | 552349. 2711 |
| M658T418_1 | 658. 3278121 | 417. 676 | 21509507. 15 |
| M658T418_2 | 658. 3438193 | 417. 676 | 32673440. 55 |
| M659T665   | 659. 2656228 | 664. 745 | 1139095. 081 |
| M659T426   | 659. 3176987 | 425. 909 | 1096985. 806 |
| M659T418   | 659. 3302528 | 417. 676 | 5828979. 66  |
| M660T607_1 | 660. 2492185 | 606. 774 | 11913432. 73 |
| M660T607_2 | 660. 269322  | 606. 774 | 24410963. 11 |
| M661T623_1 | 660. 7522403 | 623. 11  | 9756258. 127 |
| M661T607   | 660. 7524528 | 606. 774 | 9241369. 39  |
| M661T605   | 660. 7651571 | 605. 264 | 15871139. 35 |
| M661T623_2 | 660. 7656683 | 623. 11  | 15795365. 82 |
| M661T663   | 660. 7816082 | 663. 287 | 15778939. 39 |
| M661T143   | 661. 1727675 | 142. 85  | 2439389. 972 |
| M661T90_1  | 661. 2652809 | 89. 6999 | 204743868. 2 |
| M661T90_2  | 661. 2814039 | 89. 6999 | 239896764. 1 |
| M661T665   | 661. 2958256 | 664. 745 | 1047784. 785 |
| M662T524_1 | 661. 7745623 | 523. 735 | 1262802. 576 |
| M662T524_2 | 661. 7898117 | 523. 735 | 1070401. 184 |
| M662T102   | 662. 249662  | 102. 247 | 10068912. 07 |
| M662T90    | 662. 2744652 | 89. 6999 | 84636974. 19 |
| M662T525   | 662. 2771712 | 525. 132 | 1258603. 418 |
| M662T524_3 | 662. 2913591 | 523. 735 | 792746. 9842 |
| M662T562_1 | 662. 4539265 | 561. 955 | 8744308. 474 |
| M662T562_2 | 662. 4660519 | 561. 955 | 8207843. 837 |
| M663T82_1  | 662. 7190373 | 82. 0569 | 5984029. 316 |
| M663T82_2  | 662. 7351709 | 82. 0569 | 8277733. 381 |
| M663T521_1 | 662. 856477  | 520. 739 | 21802615. 9  |

|            |              |          |              |
|------------|--------------|----------|--------------|
| M663T90    | 663. 2853134 | 89. 6999 | 12958547. 63 |
| M663T521_2 | 663. 3621205 | 520. 739 | 11996178. 48 |
| M663T608   | 663. 4548035 | 608. 261 | 1567990. 013 |
| M664T449   | 664. 3100776 | 448. 978 | 2538269. 76  |
| M664T586   | 664. 3240785 | 585. 968 | 1971861. 162 |
| M664T448   | 664. 3260161 | 447. 531 | 2756009. 835 |
| M664T607_1 | 664. 4383561 | 606. 774 | 1340410. 825 |
| M664T607_2 | 664. 4534641 | 606. 774 | 1795148. 183 |
| M664T741   | 664. 459531  | 741. 302 | 666967. 9429 |
| M665T448   | 664. 8168542 | 447. 531 | 1106303. 844 |
| M666T159_1 | 666. 2306075 | 159. 017 | 13314802. 05 |
| M666T223_1 | 666. 2299366 | 223. 474 | 12205542. 71 |
| M666T152_1 | 666. 2299664 | 152. 375 | 23204755. 12 |
| M666T108_1 | 666. 2300565 | 107. 537 | 60846670. 79 |
| M666T291   | 666. 2320941 | 291. 307 | 51111975. 98 |
| M666T143_1 | 666. 2303915 | 142. 85  | 13391144. 16 |
| M666T258_1 | 666. 2310138 | 258. 489 | 9883938. 75  |
| M666T121   | 666. 2304717 | 120. 525 | 12122700. 26 |
| M666T210_1 | 666. 2300585 | 210. 186 | 16790421. 34 |
| M666T239_1 | 666. 2309851 | 238. 605 | 20110541. 84 |
| M666T89_1  | 666. 2299318 | 88. 6838 | 155179893. 4 |
| M666T188   | 666. 2318611 | 188. 126 | 74132167. 11 |
| M666T159_2 | 666. 2481767 | 159. 017 | 20734740. 88 |
| M666T223_2 | 666. 248284  | 223. 474 | 17117718. 99 |
| M666T190   | 666. 2481982 | 189. 571 | 45533133. 05 |
| M666T293   | 666. 248359  | 292. 623 | 67959047. 73 |
| M666T180   | 666. 2485463 | 179. 75  | 32884088. 8  |
| M666T152_2 | 666. 2483129 | 152. 375 | 32854157. 76 |
| M666T108_2 | 666. 2480825 | 107. 537 | 89055033. 89 |
| M666T143_2 | 666. 2484317 | 142. 85  | 21061106. 06 |
| M666T169   | 666. 2477455 | 169. 221 | 28078583. 47 |
| M666T258_2 | 666. 2481093 | 258. 489 | 14486035. 62 |
| M666T210_2 | 666. 2484048 | 210. 186 | 23319228. 38 |
| M666T239_2 | 666. 2480294 | 238. 605 | 29373255. 47 |
| M666T89_2  | 666. 2482703 | 88. 6838 | 215267474. 4 |
| M666T435   | 666. 3125106 | 434. 589 | 1291153. 146 |
| M667T649_1 | 667. 2070081 | 649. 338 | 11806878. 96 |
| M667T127   | 667. 2130961 | 126. 785 | 768955. 6852 |
| M667T94    | 667. 2125228 | 93. 7378 | 160100751. 7 |
| M667T109   | 667. 2136456 | 108. 698 | 9511761. 489 |
| M667T649_2 | 667. 2192909 | 649. 338 | 129573818. 8 |
| M667T632   | 667. 2189161 | 631. 982 | 5620956. 906 |
| M667T95_1  | 667. 2274883 | 94. 7467 | 439817943. 4 |
| M667T88    | 667. 2401666 | 87. 6739 | 49216050. 74 |
| M667T649_3 | 667. 2315475 | 649. 338 | 138957070. 8 |
| M667T108   | 667. 2398515 | 107. 537 | 23256698. 74 |
| M667T291   | 667. 2358908 | 291. 307 | 11572900. 49 |
| M667T95_2  | 667. 2397431 | 94. 7467 | 145952212. 6 |
| M667T648   | 667. 2444572 | 648. 026 | 14501274. 54 |
| M667T240_1 | 667. 24027   | 239. 913 | 7135303. 284 |
| M667T190   | 667. 2490134 | 189. 571 | 12469354. 75 |
| M667T293   | 667. 250169  | 292. 623 | 17719179. 34 |
| M667T143   | 667. 2520607 | 142. 85  | 3252681. 968 |
| M667T168   | 667. 251781  | 167. 804 | 7101880. 49  |



|            |              |          |              |
|------------|--------------|----------|--------------|
| M667T90    | 667. 2518612 | 89. 6999 | 55018426. 66 |
| M667T152   | 667. 2502264 | 152. 375 | 7733197. 658 |
| M667T240_2 | 667. 2520307 | 239. 913 | 4464625. 82  |
| M667T604_1 | 667. 3622162 | 603. 95  | 7998990. 947 |
| M667T604_2 | 667. 3744751 | 603. 95  | 5910686. 308 |
| M667T595_1 | 667. 3908669 | 595. 066 | 9563806. 777 |
| M667T595_2 | 667. 4030674 | 595. 066 | 23579868. 96 |
| M668T293_1 | 668. 1865208 | 292. 623 | 5280995. 018 |
| M668T222_1 | 668. 1855404 | 222. 017 | 10737081. 11 |
| M668T222_2 | 668. 1974188 | 222. 017 | 8072958. 965 |
| M668T94    | 668. 2176295 | 93. 7378 | 55703480. 34 |
| M668T649_1 | 668. 2256446 | 649. 338 | 44051723. 92 |
| M668T218_1 | 668. 2264118 | 217. 866 | 5457254. 274 |
| M668T293_2 | 668. 2366375 | 292. 623 | 12382254. 36 |
| M668T95    | 668. 2339135 | 94. 7467 | 109425706    |
| M668T649_2 | 668. 237927  | 649. 338 | 31952411. 07 |
| M668T218_2 | 668. 2420158 | 217. 866 | 8687811. 825 |
| M668T96    | 668. 2522686 | 95. 7572 | 5447487. 872 |
| M668T89    | 668. 2525718 | 88. 6838 | 15200088. 08 |
| M668T291   | 668. 2509647 | 291. 307 | 4099870. 309 |
| M668T604_1 | 668. 3628639 | 603. 95  | 2190144. 181 |
| M668T604_2 | 668. 3768132 | 603. 95  | 2347107. 09  |
| M668T595   | 668. 4053121 | 595. 066 | 8914772. 535 |
| M669T223   | 668. 6831689 | 223. 474 | 4446557. 927 |
| M669T222   | 668. 6973604 | 222. 017 | 5589896. 296 |
| M669T239   | 669. 1945013 | 238. 605 | 6568250. 423 |
| M669T171_1 | 669. 1970316 | 170. 665 | 6020055. 987 |
| M669T245   | 669. 1981659 | 245. 199 | 8650902. 462 |
| M669T290_1 | 669. 1977953 | 289. 912 | 6236778. 327 |
| M669T195_1 | 669. 2021891 | 195. 23  | 8045169. 063 |
| M669T290_2 | 669. 212363  | 289. 912 | 6531546. 202 |
| M669T243   | 669. 2104783 | 242. 682 | 22469443. 06 |
| M669T171_2 | 669. 213087  | 170. 665 | 7043368. 437 |
| M669T195_2 | 669. 2154721 | 195. 23  | 2972418. 09  |
| M669T95_1  | 669. 2216512 | 94. 7467 | 18403828. 81 |
| M669T649   | 669. 234541  | 649. 338 | 12647408. 58 |
| M669T95_2  | 669. 2371854 | 94. 7467 | 24072115. 38 |
| M669T294   | 669. 2449598 | 293. 896 | 798230. 6887 |
| M669T218   | 669. 2446256 | 217. 866 | 2258071. 495 |
| M670T290_1 | 669. 6984501 | 289. 912 | 4438472. 139 |
| M670T171_1 | 669. 6988487 | 170. 665 | 5682551. 806 |
| M670T240   | 669. 6989564 | 239. 913 | 10325978. 56 |
| M670T290_2 | 669. 7132543 | 289. 912 | 4153597. 36  |
| M670T252   | 669. 7111754 | 251. 555 | 4457592. 258 |
| M670T172   | 669. 715102  | 171. 935 | 9373952. 957 |
| M670T237   | 669. 7113522 | 237. 171 | 8600058. 799 |
| M670T471   | 669. 824338  | 470. 602 | 1874105. 664 |
| M670T244   | 670. 2005522 | 244. 085 | 7965817. 777 |
| M670T250   | 670. 212504  | 250. 144 | 2517216. 079 |
| M670T239   | 670. 2132358 | 238. 605 | 5762998. 666 |
| M670T171_2 | 670. 2119899 | 170. 665 | 2495651. 18  |
| M670T773   | 670. 3829904 | 773. 437 | 23605204. 75 |
| M670T775   | 670. 3993725 | 774. 919 | 37782369. 56 |
| M671T554_1 | 670. 857711  | 553. 936 | 2247381. 082 |

|            |              |          |              |
|------------|--------------|----------|--------------|
| M671T554_2 | 670. 8716863 | 553. 936 | 4990728. 428 |
| M671T293_1 | 671. 182689  | 292. 623 | 27269672. 83 |
| M671T108_1 | 671. 1866268 | 107. 537 | 51942782. 27 |
| M671T190_1 | 671. 1928558 | 189. 571 | 35071541. 72 |
| M671T293_2 | 671. 1929965 | 292. 623 | 60443485. 78 |
| M671T180_1 | 671. 1932595 | 179. 75  | 29625758. 22 |
| M671T649   | 671. 1946842 | 649. 338 | 2093004. 428 |
| M671T160_1 | 671. 1927922 | 160. 369 | 20788219. 6  |
| M671T168   | 671. 1928063 | 167. 804 | 29381725. 38 |
| M671T143_1 | 671. 1931734 | 142. 85  | 17734292. 75 |
| M671T258_1 | 671. 1930882 | 258. 489 | 7237716. 072 |
| M671T210_1 | 671. 1933728 | 210. 186 | 18626050. 29 |
| M671T239_1 | 671. 1927962 | 238. 605 | 35293951. 69 |
| M671T152_1 | 671. 1932812 | 152. 375 | 27103454. 76 |
| M671T222_1 | 671. 1931772 | 222. 017 | 19984683. 74 |
| M671T108_2 | 671. 2070209 | 107. 537 | 34497196. 52 |
| M671T121   | 671. 205062  | 120. 525 | 13058793. 54 |
| M671T190_2 | 671. 2065283 | 189. 571 | 28293416. 52 |
| M671T293_3 | 671. 2053661 | 292. 623 | 46829568. 57 |
| M671T180_2 | 671. 2056211 | 179. 75  | 22027247. 65 |
| M671T160_2 | 671. 205145  | 160. 369 | 19236522. 11 |
| M671T169   | 671. 2048619 | 169. 221 | 21872455. 87 |
| M671T143_2 | 671. 2055398 | 142. 85  | 14347209. 14 |
| M671T258_2 | 671. 2050893 | 258. 489 | 3188482. 1   |
| M671T210_2 | 671. 2057374 | 210. 186 | 14484396. 36 |
| M671T239_2 | 671. 2071973 | 238. 605 | 28400663. 81 |
| M671T152_2 | 671. 2056434 | 152. 375 | 21035482. 48 |
| M671T222_2 | 671. 2055276 | 222. 017 | 15627761. 12 |
| M671T554_3 | 671. 3675071 | 553. 936 | 3403035. 371 |
| M671T832   | 671. 4792037 | 831. 709 | 4148876. 107 |
| M672T663   | 671. 7969605 | 663. 287 | 751696. 7007 |
| M672T293_1 | 672. 1918126 | 292. 623 | 12966461. 42 |
| M672T239_1 | 672. 1938287 | 238. 605 | 10244334. 91 |
| M672T109_1 | 672. 1958719 | 108. 698 | 12680711. 46 |
| M672T190   | 672. 2083172 | 189. 571 | 8152240. 003 |
| M672T293_2 | 672. 204208  | 292. 623 | 17577488. 51 |
| M672T239_2 | 672. 208158  | 238. 605 | 9658878. 232 |
| M672T109_2 | 672. 2079846 | 108. 698 | 11255999. 66 |
| M672T152   | 672. 2073892 | 152. 375 | 5853867. 328 |
| M672T448   | 672. 3544197 | 447. 531 | 1515698. 957 |
| M672T773_1 | 672. 395467  | 773. 437 | 2976286. 513 |
| M672T773_2 | 672. 4077988 | 773. 437 | 2454575. 989 |
| M673T777_1 | 673. 3132198 | 777. 245 | 3121309. 564 |
| M673T614_1 | 673. 3154768 | 614. 215 | 1229809. 942 |
| M673T777_2 | 673. 3297827 | 777. 245 | 4485060. 211 |
| M673T614_2 | 673. 3312066 | 614. 215 | 856341. 0747 |
| M673T731_1 | 673. 4162761 | 731. 347 | 14284228. 22 |
| M673T660_1 | 673. 4224451 | 660. 455 | 61085558. 15 |
| M673T713_1 | 673. 4246539 | 713. 464 | 15047417. 76 |
| M673T731_2 | 673. 430773  | 731. 347 | 25286113. 18 |
| M673T660_2 | 673. 4369438 | 660. 455 | 53029335. 92 |
| M673T713_2 | 673. 4401275 | 713. 464 | 5761686. 301 |
| M674T426   | 673. 8491979 | 425. 909 | 794777. 1201 |
| M674T516   | 674. 3214911 | 516. 214 | 1502751. 547 |

|            |              |          |              |
|------------|--------------|----------|--------------|
| M674T660_1 | 674. 424497  | 660. 455 | 28459216. 33 |
| M674T785   | 674. 4278647 | 785. 136 | 3464792. 952 |
| M674T660_2 | 674. 4407318 | 660. 455 | 22312556. 6  |
| M674T784   | 674. 4433386 | 783. 78  | 542622. 6175 |
| M675T493   | 675. 3011365 | 492. 895 | 622841. 3196 |
| M675T478   | 675. 3131908 | 477. 989 | 2106796. 052 |
| M675T584   | 675. 3748099 | 584. 417 | 3339965. 481 |
| M676T586_1 | 675. 8638753 | 585. 968 | 4805365. 73  |
| M676T586_2 | 675. 8763703 | 585. 968 | 3442238. 525 |
| M676T506   | 676. 3530387 | 505. 855 | 1077698. 013 |
| M677T119_1 | 677. 1364068 | 119. 433 | 7860001. 333 |
| M677T113   | 677. 133404  | 112. 781 | 1717006. 857 |
| M677T119_2 | 677. 148939  | 119. 433 | 7099552. 252 |
| M677T290_1 | 677. 1737912 | 289. 912 | 6083923. 405 |
| M677T290_2 | 677. 1863696 | 289. 912 | 47116062     |
| M677T241   | 677. 1860766 | 241. 368 | 140343567. 1 |
| M677T110_1 | 677. 1855717 | 110. 047 | 12979097. 7  |
| M677T171_1 | 677. 1859376 | 170. 665 | 69042827. 67 |
| M677T150_1 | 677. 1859628 | 149. 65  | 35179298. 97 |
| M677T131   | 677. 1859864 | 130. 668 | 29099265. 57 |
| M677T195_1 | 677. 1861869 | 195. 23  | 48435574. 27 |
| M677T209   | 677. 1860694 | 208. 905 | 18904731. 38 |
| M677T250   | 677. 1985287 | 250. 144 | 70149462. 35 |
| M677T183   | 677. 2032126 | 182. 574 | 7505786. 589 |
| M677T290_3 | 677. 1989055 | 289. 912 | 56131035. 93 |
| M677T110_2 | 677. 1985377 | 110. 047 | 16131198. 03 |
| M677T210   | 677. 1988835 | 210. 186 | 26058179. 05 |
| M677T171_2 | 677. 1987729 | 170. 665 | 84310187. 34 |
| M677T150_2 | 677. 1987783 | 149. 65  | 48289013. 43 |
| M677T240   | 677. 198572  | 239. 913 | 106531519. 8 |
| M677T195_2 | 677. 1987205 | 195. 23  | 58848485. 18 |
| M677T477   | 677. 2337608 | 476. 554 | 729488. 8085 |
| M677T493   | 677. 3535363 | 492. 895 | 5783313. 78  |
| M678T245_1 | 677. 6773884 | 245. 199 | 7650903. 343 |
| M678T239_1 | 677. 6835662 | 238. 605 | 23460163. 67 |
| M678T171_1 | 677. 6837472 | 170. 665 | 21823535. 73 |
| M678T194_1 | 677. 6837753 | 193. 823 | 17237424. 76 |
| M678T148_1 | 677. 6839561 | 148. 117 | 7885766. 833 |
| M678T290_1 | 677. 6884986 | 289. 912 | 23948833. 33 |
| M678T246_1 | 677. 6921521 | 246. 372 | 35733126. 46 |
| M678T239_2 | 677. 6961142 | 238. 605 | 52333495. 26 |
| M678T171_2 | 677. 6962934 | 170. 665 | 50181849. 82 |
| M678T194_2 | 677. 6963235 | 193. 823 | 37557858. 91 |
| M678T148_2 | 677. 6964859 | 148. 117 | 16879912. 39 |
| M678T245_2 | 677. 7047683 | 245. 199 | 20152494. 75 |
| M678T252   | 677. 7044362 | 251. 555 | 16948971. 47 |
| M678T290_2 | 677. 7044668 | 289. 912 | 20967997. 24 |
| M678T239_3 | 677. 7065711 | 238. 605 | 40064920. 67 |
| M678T290_3 | 678. 1867084 | 289. 912 | 8008245. 874 |
| M678T246_2 | 678. 1858764 | 246. 372 | 10733449. 27 |
| M678T169   | 678. 1890931 | 169. 221 | 19029424     |
| M678T239_4 | 678. 1897282 | 238. 605 | 19444585. 67 |
| M678T194_3 | 678. 1899161 | 193. 823 | 13206256. 87 |
| M678T290_4 | 678. 2032333 | 289. 912 | 11706673. 91 |

|            |              |          |              |
|------------|--------------|----------|--------------|
| M678T250   | 678. 2025378 | 250. 144 | 9891077. 141 |
| M678T171_3 | 678. 2028502 | 170. 665 | 17299773. 58 |
| M678T194_4 | 678. 20272   | 193. 823 | 13540744. 14 |
| M678T240   | 678. 2026802 | 239. 913 | 26391917. 95 |
| M678T144   | 678. 2123466 | 143. 959 | 4870428. 797 |
| M678T459   | 678. 3404911 | 458. 985 | 30340545. 93 |
| M679T171   | 678. 6905164 | 170. 665 | 5052793. 875 |
| M679T195_1 | 678. 6893955 | 195. 23  | 2685830. 516 |
| M679T250_1 | 678. 6929782 | 250. 144 | 3477091. 09  |
| M679T240_1 | 678. 6929174 | 239. 913 | 7453128. 399 |
| M679T172   | 678. 7056085 | 171. 935 | 5158412. 473 |
| M679T195_2 | 678. 7075516 | 195. 23  | 2018380. 896 |
| M679T250_2 | 678. 7054475 | 250. 144 | 3300457. 126 |
| M679T240_2 | 678. 7054938 | 239. 913 | 6528018. 343 |
| M679T240_3 | 679. 1872723 | 239. 913 | 2189828. 339 |
| M679T249   | 679. 2043198 | 248. 895 | 1256059. 72  |
| M679T458   | 679. 33057   | 457. 576 | 2931967. 793 |
| M679T466   | 679. 3304606 | 466. 162 | 3298987. 564 |
| M679T557   | 679. 3429613 | 556. 816 | 596119. 9393 |
| M679T747   | 679. 3851056 | 746. 977 | 948843. 8505 |
| M680T239   | 680. 1977167 | 238. 605 | 1794919. 672 |
| M681T515   | 681. 2857912 | 514. 727 | 3544704. 86  |
| M683T493   | 683. 1403659 | 492. 895 | 1742058. 469 |
| M683T642_1 | 683. 2914032 | 642. 211 | 5816265. 541 |
| M683T642_2 | 683. 306592  | 642. 211 | 8164822. 521 |
| M683T670_1 | 683. 3732635 | 670. 166 | 3705025. 185 |
| M683T617_1 | 683. 3828718 | 617. 133 | 8900835. 498 |
| M683T597_1 | 683. 3827101 | 596. 628 | 30698662. 21 |
| M683T669   | 683. 3870769 | 668. 867 | 63538552. 88 |
| M683T617_2 | 683. 3954835 | 617. 133 | 26902738. 62 |
| M683T597_2 | 683. 3954101 | 596. 628 | 93503423. 36 |
| M683T670_2 | 683. 4040123 | 670. 166 | 82542257. 95 |
| M683T528   | 683. 4038357 | 528. 185 | 7563182. 787 |
| M683T617_3 | 683. 4103585 | 617. 133 | 13544910. 46 |
| M683T595   | 683. 4099659 | 595. 066 | 48704700. 67 |
| M683T670_3 | 683. 4230834 | 670. 166 | 693764. 9892 |
| M684T626   | 683. 7936174 | 626. 042 | 5087165. 099 |
| M684T642_1 | 683. 7940656 | 642. 211 | 5895585. 996 |
| M684T642_2 | 683. 8067333 | 642. 211 | 6975557. 694 |
| M684T144_1 | 684. 2478474 | 143. 959 | 126774756    |
| M684T649_1 | 684. 242856  | 649. 338 | 5616384. 879 |
| M684T199_1 | 684. 2436191 | 199. 43  | 10460810. 2  |
| M684T103_1 | 684. 2436853 | 103. 423 | 75325372. 34 |
| M684T181   | 684. 2431618 | 181. 154 | 14538799. 63 |
| M684T291_1 | 684. 2472638 | 291. 307 | 6187806. 159 |
| M684T144_2 | 684. 2605751 | 143. 959 | 102347966. 5 |
| M684T180   | 684. 2560674 | 179. 75  | 11683141. 34 |
| M684T649_2 | 684. 2563674 | 649. 338 | 10417195. 42 |
| M684T199_2 | 684. 2563489 | 199. 43  | 14012124. 17 |
| M684T103_2 | 684. 2600126 | 103. 423 | 83085593. 93 |
| M684T264   | 684. 2607146 | 264. 079 | 4266974. 768 |
| M684T291_2 | 684. 2596877 | 291. 307 | 5268092. 316 |
| M684T641   | 684. 3089545 | 640. 717 | 2314603. 629 |
| M684T607   | 684. 3416252 | 606. 774 | 4564824. 116 |

|            |              |          |              |
|------------|--------------|----------|--------------|
| M684T669   | 684. 3920147 | 668. 867 | 29094001. 48 |
| M684T597_1 | 684. 3962222 | 596. 628 | 33866950. 28 |
| M684T670_1 | 684. 4047418 | 670. 166 | 37201868. 44 |
| M684T597_2 | 684. 408946  | 596. 628 | 26069507. 64 |
| M684T670_2 | 684. 4153456 | 670. 166 | 7544929. 45  |
| M685T240_1 | 684. 6782205 | 239. 913 | 1380229. 019 |
| M685T497_1 | 684. 8718286 | 497. 214 | 2352633. 402 |
| M685T290_1 | 685. 1702579 | 289. 912 | 9286939. 775 |
| M685T250_1 | 685. 1698745 | 250. 144 | 9337218. 202 |
| M685T171_1 | 685. 1697571 | 170. 665 | 11484242. 42 |
| M685T194   | 685. 1738113 | 193. 823 | 16234206. 69 |
| M685T240_2 | 685. 17365   | 239. 913 | 29811690. 55 |
| M685T148   | 685. 1741512 | 148. 117 | 9325869. 418 |
| M685T290_2 | 685. 1828145 | 289. 912 | 15348205. 89 |
| M685T250_2 | 685. 1863576 | 250. 144 | 13369795. 5  |
| M685T171_2 | 685. 186557  | 170. 665 | 17831223. 84 |
| M685T239   | 685. 1863116 | 238. 605 | 29698292. 76 |
| M685T195   | 685. 1864888 | 195. 23  | 18636263. 64 |
| M685T95_1  | 685. 2170665 | 94. 7467 | 81921961. 15 |
| M685T95_2  | 685. 2310577 | 94. 7467 | 666885729. 1 |
| M685T201   | 685. 2464133 | 200. 766 | 1459658. 548 |
| M685T144_1 | 685. 2506523 | 143. 959 | 31531760. 87 |
| M685T95_3  | 685. 2480662 | 94. 7467 | 300278444. 1 |
| M685T109_1 | 685. 2498185 | 108. 698 | 8378723. 914 |
| M685T144_2 | 685. 2634041 | 143. 959 | 27801376. 85 |
| M685T109_2 | 685. 2628052 | 108. 698 | 5247936. 691 |
| M685T497_2 | 685. 3525188 | 497. 214 | 1820664. 66  |
| M685T605   | 685. 3482789 | 605. 264 | 1672773. 903 |
| M685T497_3 | 685. 371908  | 497. 214 | 1299893. 733 |
| M685T670   | 685. 394929  | 670. 166 | 5497481. 309 |
| M685T597   | 685. 3952581 | 596. 628 | 5998904. 589 |
| M685T669   | 685. 4115992 | 668. 867 | 5668965. 476 |
| M685T595   | 685. 4115721 | 595. 066 | 5784649. 165 |
| M686T290_1 | 685. 6749117 | 289. 912 | 6893900. 772 |
| M686T241_1 | 685. 6714493 | 241. 368 | 17584604. 68 |
| M686T171_1 | 685. 6715139 | 170. 665 | 7603994. 261 |
| M686T148   | 685. 6721045 | 148. 117 | 3118238. 283 |
| M686T195_1 | 685. 676102  | 195. 23  | 9393803. 528 |
| M686T290_2 | 685. 6883473 | 289. 912 | 8034942. 516 |
| M686T241_2 | 685. 6884736 | 241. 368 | 24278654. 14 |
| M686T171_2 | 685. 6833868 | 170. 665 | 13006957. 06 |
| M686T195_2 | 685. 6888667 | 195. 23  | 8580898. 446 |
| M686T290_3 | 686. 1739551 | 289. 912 | 4237726. 574 |
| M686T171_3 | 686. 180042  | 170. 665 | 7482874. 558 |
| M686T240_1 | 686. 1777872 | 239. 913 | 14944997. 19 |
| M686T144_1 | 686. 1871101 | 143. 959 | 13976987. 61 |
| M686T240_2 | 686. 1927033 | 239. 913 | 5921467. 534 |
| M686T144_2 | 686. 199875  | 143. 959 | 31264898. 95 |
| M686T95_1  | 686. 2252711 | 94. 7467 | 73564162. 23 |
| M686T95_2  | 686. 2423177 | 94. 7467 | 230375698. 5 |
| M686T144_3 | 686. 2513357 | 143. 959 | 6609646. 665 |
| M686T95_3  | 686. 2529716 | 94. 7467 | 64243612. 19 |
| M686T144_4 | 686. 2662165 | 143. 959 | 5754944. 755 |
| M687T240_1 | 686. 675067  | 239. 913 | 2525390. 124 |

|            |              |          |              |
|------------|--------------|----------|--------------|
| M687T240_2 | 686. 690057  | 239. 913 | 2004709. 901 |
| M687T144_1 | 686. 7003246 | 143. 959 | 20666081. 54 |
| M687T144_2 | 686. 711429  | 143. 959 | 12776132. 01 |
| M687T293   | 687. 1657363 | 292. 623 | 2305297. 541 |
| M687T152   | 687. 1630675 | 152. 375 | 3744441. 045 |
| M687T240_3 | 687. 1629268 | 239. 913 | 2491088. 251 |
| M687T108   | 687. 1699006 | 107. 537 | 6493956. 664 |
| M687T294   | 687. 1782728 | 293. 896 | 1490790. 071 |
| M687T240_4 | 687. 1766812 | 239. 913 | 3469803. 933 |
| M687T144_3 | 687. 1899728 | 143. 959 | 4048166. 851 |
| M687T144_4 | 687. 2026115 | 143. 959 | 8842488. 476 |
| M687T95_1  | 687. 2322993 | 94. 7467 | 41104055. 41 |
| M687T95_2  | 687. 249383  | 94. 7467 | 51363273. 94 |
| M687T703_1 | 687. 4592213 | 703. 35  | 5402725. 851 |
| M687T703_2 | 687. 4761892 | 703. 35  | 4917812. 809 |
| M688T241   | 688. 1768671 | 241. 368 | 1318099. 68  |
| M688T94    | 688. 2359762 | 93. 7378 | 8408017. 801 |
| M688T833_1 | 688. 3893715 | 833. 029 | 6554612. 093 |
| M688T833_2 | 688. 4000763 | 833. 029 | 26463582. 86 |
| M688T833_3 | 688. 4107819 | 833. 029 | 18391134. 06 |
| M689T119   | 689. 1896124 | 119. 433 | 9490611. 448 |
| M689T158_1 | 689. 1967502 | 157. 773 | 16477404. 82 |
| M689T163_1 | 689. 1970603 | 162. 728 | 8731049. 575 |
| M689T144_1 | 689. 1972822 | 143. 959 | 88523196     |
| M689T294_1 | 689. 1996117 | 293. 896 | 4246447. 669 |
| M689T199_1 | 689. 1973196 | 199. 43  | 10342972. 76 |
| M689T181_1 | 689. 1971921 | 181. 154 | 10533726. 51 |
| M689T104   | 689. 1970905 | 104. 493 | 25822018. 91 |
| M689T158_2 | 689. 2144346 | 157. 773 | 22875164. 27 |
| M689T163_2 | 689. 2142227 | 162. 728 | 12178882. 35 |
| M689T103   | 689. 2141714 | 103. 423 | 36523948. 55 |
| M689T109   | 689. 2142031 | 108. 698 | 36034466. 71 |
| M689T144_2 | 689. 2144334 | 143. 959 | 123931581. 2 |
| M689T294_2 | 689. 213717  | 293. 896 | 4379220. 604 |
| M689T199_2 | 689. 2144858 | 199. 43  | 14102611. 47 |
| M689T181_2 | 689. 2143287 | 181. 154 | 13650306. 74 |
| M689T811   | 689. 3259677 | 811. 413 | 583580. 4965 |
| M689T771   | 689. 3994265 | 771. 042 | 2529224. 916 |
| M689T574_1 | 689. 4034737 | 574. 363 | 15836061. 88 |
| M689T702_1 | 689. 4029238 | 702. 055 | 25474969. 4  |
| M689T772   | 689. 4138056 | 772. 206 | 3563916. 147 |
| M689T574_2 | 689. 4156325 | 574. 363 | 123523427. 5 |
| M689T702_2 | 689. 4183961 | 702. 055 | 184014472. 7 |
| M689T574_3 | 689. 4285063 | 574. 363 | 135264180. 9 |
| M689T702_3 | 689. 4351004 | 702. 055 | 71108996. 56 |
| M690T103_1 | 690. 2059488 | 103. 423 | 8153773. 712 |
| M690T110_1 | 690. 205957  | 110. 047 | 10091943. 47 |
| M690T163   | 690. 208015  | 162. 728 | 8152026. 753 |
| M690T144_1 | 690. 2067565 | 143. 959 | 39198243. 91 |
| M690T290   | 690. 2082389 | 289. 912 | 3410417. 451 |
| M690T122_1 | 690. 2081234 | 122. 007 | 6123627. 688 |
| M690T199   | 690. 2062505 | 199. 43  | 4278891. 792 |
| M690T103_2 | 690. 2188545 | 103. 423 | 6743773. 596 |
| M690T110_2 | 690. 2185194 | 110. 047 | 8655954. 642 |

|            |              |          |              |
|------------|--------------|----------|--------------|
| M690T144_2 | 690. 2195219 | 143. 959 | 31277986. 46 |
| M690T122_2 | 690. 2187609 | 122. 007 | 5235025. 672 |
| M690T160   | 690. 2228527 | 160. 369 | 4857158. 602 |
| M690T702_1 | 690. 4109439 | 702. 055 | 16694995. 06 |
| M690T771   | 690. 4078967 | 771. 042 | 900962. 6193 |
| M690T702_2 | 690. 4277326 | 702. 055 | 79443472. 02 |
| M690T574   | 690. 4340524 | 574. 363 | 49933004. 09 |
| M690T702_3 | 690. 4404724 | 702. 055 | 19659193. 32 |
| M691T144   | 691. 2108683 | 143. 959 | 9038222. 496 |
| M691T685_1 | 691. 2182361 | 684. 985 | 5397595. 197 |
| M691T685_2 | 691. 2349553 | 684. 985 | 4895387. 193 |
| M691T376   | 691. 24874   | 376. 409 | 14212149. 39 |
| M691T375   | 691. 2638768 | 375. 021 | 6102727. 786 |
| M691T641   | 691. 3072749 | 640. 717 | 672069. 2629 |
| M691T522   | 691. 3317966 | 522. 177 | 2554519. 015 |
| M691T702_1 | 691. 4199436 | 702. 055 | 18714297. 39 |
| M691T702_2 | 691. 4350274 | 702. 055 | 20673879. 42 |
| M692T685_1 | 692. 2202565 | 684. 985 | 1059239. 815 |
| M692T685_2 | 692. 2375325 | 684. 985 | 1142085. 962 |
| M692T375_1 | 692. 2532218 | 375. 021 | 4065268. 808 |
| M692T375_2 | 692. 2665773 | 375. 021 | 2318817. 656 |
| M692T777   | 692. 3637462 | 777. 245 | 2463846. 883 |
| M692T702   | 692. 4250054 | 702. 055 | 3089225. 86  |
| M693T209   | 693. 1220136 | 208. 905 | 5117397. 064 |
| M693T293   | 693. 1278259 | 292. 623 | 10931889. 96 |
| M693T152   | 693. 1265097 | 152. 375 | 6855416. 245 |
| M693T190   | 693. 1411823 | 189. 571 | 7302233. 025 |
| M693T291   | 693. 1391723 | 291. 307 | 9773684. 227 |
| M693T210   | 693. 1397938 | 210. 186 | 4675989. 308 |
| M693T659   | 693. 444019  | 658. 953 | 797290. 204  |
| M694T144_1 | 694. 1769034 | 143. 959 | 5411804. 129 |
| M694T144_2 | 694. 1919423 | 143. 959 | 9049415. 587 |
| M694T308   | 694. 2152242 | 307. 735 | 901627. 2842 |
| M694T211_1 | 694. 2105613 | 211. 288 | 2716791. 947 |
| M694T211_2 | 694. 225222  | 211. 288 | 3353361. 182 |
| M694T293_1 | 694. 2652077 | 292. 623 | 4714360. 82  |
| M694T152_1 | 694. 2656965 | 152. 375 | 3253170. 927 |
| M694T188_1 | 694. 2645372 | 188. 126 | 3124192. 078 |
| M694T293_2 | 694. 2778733 | 292. 623 | 4811686. 666 |
| M694T152_2 | 694. 2784167 | 152. 375 | 3496369. 018 |
| M694T188_2 | 694. 2800681 | 188. 126 | 3214645. 643 |
| M695T101   | 695. 1945236 | 101. 161 | 9537206. 402 |
| M695T506   | 695. 3105023 | 505. 855 | 5143741. 202 |
| M696T638_1 | 695. 526371  | 637. 996 | 3787546. 863 |
| M696T638_2 | 695. 54199   | 637. 996 | 2751351. 281 |
| M696T101   | 695. 7138299 | 101. 161 | 4727559. 733 |
| M696T504_1 | 695. 8254191 | 504. 466 | 14103715. 84 |
| M696T241   | 696. 1796267 | 241. 368 | 364127. 5053 |
| M696T504_2 | 696. 3338764 | 504. 466 | 4538151. 668 |
| M696T830   | 696. 3719416 | 830. 193 | 1706428. 24  |
| M697T638_1 | 696. 5322209 | 637. 996 | 2009805. 177 |
| M697T638_2 | 696. 5482739 | 637. 996 | 389303. 6624 |
| M697T240   | 696. 6652995 | 239. 913 | 583925. 0853 |
| M697T605_1 | 697. 370232  | 605. 264 | 20000921. 36 |

|            |              |          |              |
|------------|--------------|----------|--------------|
| M697T623_1 | 697. 36932   | 623. 11  | 8293960. 847 |
| M697T591_1 | 697. 3702094 | 590. 607 | 24938183. 25 |
| M697T605_2 | 697. 3855066 | 605. 264 | 18265820. 97 |
| M697T623_2 | 697. 385956  | 623. 11  | 6714778. 691 |
| M697T591_2 | 697. 3854851 | 590. 607 | 22572272. 61 |
| M698T607   | 698. 3244629 | 606. 774 | 1429901. 75  |
| M698T605_1 | 698. 3697134 | 605. 264 | 5504959. 057 |
| M698T591   | 698. 3708814 | 590. 607 | 7993866. 429 |
| M698T605_2 | 698. 386786  | 605. 264 | 7277652. 797 |
| M698T592   | 698. 3868539 | 592. 067 | 10804637. 26 |
| M698T795_1 | 698. 4182699 | 795. 165 | 3591279. 407 |
| M698T795_2 | 698. 4331117 | 795. 165 | 2395746. 081 |
| M699T448   | 698. 8055773 | 447. 531 | 1689669. 157 |
| M699T625   | 698. 8159292 | 624. 608 | 806803. 6878 |
| M699T449   | 699. 3057206 | 448. 978 | 635408. 1987 |
| M699T513_1 | 699. 3106945 | 513. 285 | 1374951. 769 |
| M699T503_1 | 699. 311377  | 503. 046 | 5579704. 441 |
| M699T513_2 | 699. 3282493 | 513. 285 | 1648927. 073 |
| M699T503_2 | 699. 328921  | 503. 046 | 6342728. 009 |
| M699T807_1 | 699. 3426751 | 807. 232 | 1707537. 372 |
| M699T807_2 | 699. 3598397 | 807. 232 | 2166603. 497 |
| M699T605   | 699. 3743007 | 605. 264 | 1338684. 693 |
| M700T503_1 | 700. 3162812 | 503. 046 | 21507114. 05 |
| M700T503_2 | 700. 3294582 | 503. 046 | 18066349. 12 |
| M700T706_1 | 700. 432368  | 706. 229 | 1678908. 096 |
| M700T706_2 | 700. 4433575 | 706. 229 | 1552263. 703 |
| M701T503_1 | 700. 8110145 | 503. 046 | 5808440. 65  |
| M701T503_2 | 700. 8286145 | 503. 046 | 10603787. 68 |
| M701T832   | 701. 3178417 | 831. 709 | 4003635. 836 |
| M701T830   | 701. 3404349 | 830. 193 | 10961515. 19 |
| M702T223   | 702. 1187856 | 223. 474 | 2583080. 187 |
| M702T293_1 | 702. 1191557 | 292. 623 | 3111901. 662 |
| M702T191_1 | 702. 1187207 | 190. 962 | 3750492. 244 |
| M702T293_2 | 702. 1341904 | 292. 623 | 3107743. 88  |
| M702T239   | 702. 13123   | 238. 605 | 4515975. 049 |
| M702T152   | 702. 1322201 | 152. 375 | 4018801. 099 |
| M702T191_2 | 702. 1332229 | 190. 962 | 4629252. 16  |
| M702T95_1  | 702. 2519339 | 94. 7467 | 25613862. 47 |
| M702T95_2  | 702. 2688134 | 94. 7467 | 44300104. 93 |
| M703T477   | 703. 3129215 | 476. 554 | 3193399. 318 |
| M703T788   | 703. 4163739 | 787. 856 | 4101226. 122 |
| M704T477   | 703. 8321974 | 476. 554 | 1928270. 334 |
| M704T93    | 704. 2135959 | 92. 7272 | 20315154. 2  |
| M704T502_1 | 704. 3479299 | 501. 549 | 2083945. 711 |
| M704T502_2 | 704. 3643603 | 501. 549 | 2323735. 043 |
| M705T144_1 | 705. 1688873 | 143. 959 | 6166129. 561 |
| M705T144_2 | 705. 1864675 | 143. 959 | 15142906. 97 |
| M705T594   | 705. 2944519 | 593. 62  | 10617697. 64 |
| M705T592   | 705. 3104914 | 592. 067 | 3413749. 473 |
| M705T669_1 | 705. 3677401 | 668. 867 | 5539238. 064 |
| M705T669_2 | 705. 3855075 | 668. 867 | 7966308. 111 |
| M705T485_1 | 705. 4116782 | 485. 471 | 2120312. 236 |
| M705T642_1 | 705. 4121894 | 642. 211 | 1262373. 74  |
| M705T485_2 | 705. 4279504 | 485. 471 | 1628493. 735 |



|            |              |          |              |
|------------|--------------|----------|--------------|
| M705T642_2 | 705. 4255077 | 642. 211 | 883429. 5171 |
| M706T144   | 706. 1901704 | 143. 959 | 2383588. 006 |
| M706T592   | 706. 289068  | 592. 067 | 1617875. 928 |
| M706T605_1 | 706. 3062725 | 605. 264 | 8946080. 512 |
| M706T605_2 | 706. 3239076 | 605. 264 | 23319381. 5  |
| M706T493_1 | 706. 3283189 | 492. 895 | 19007205. 44 |
| M706T493_2 | 706. 346119  | 492. 895 | 21196940. 68 |
| M706T669_1 | 706. 3762871 | 668. 867 | 3398793. 048 |
| M706T669_2 | 706. 3913913 | 668. 867 | 2310348. 427 |
| M707T605   | 706. 8090978 | 605. 264 | 5389673. 677 |
| M707T95_1  | 707. 2082118 | 94. 7467 | 24061571. 3  |
| M707T95_2  | 707. 2252576 | 94. 7467 | 29987233. 24 |
| M707T502   | 707. 3155457 | 501. 549 | 1853791. 911 |
| M707T493_1 | 707. 333831  | 492. 895 | 9342038. 943 |
| M707T493_2 | 707. 35099   | 492. 895 | 7986049. 64  |
| M707T702_1 | 707. 4144302 | 702. 055 | 16105315. 03 |
| M707T574_1 | 707. 4288103 | 574. 363 | 69618336. 38 |
| M707T702_2 | 707. 4290186 | 702. 055 | 97363343. 7  |
| M707T574_2 | 707. 4421941 | 574. 363 | 48972002. 65 |
| M707T702_3 | 707. 4468555 | 702. 055 | 33489502. 06 |
| M708T458   | 707. 8626307 | 457. 576 | 1249363. 327 |
| M708T493   | 708. 334623  | 492. 895 | 1607682. 763 |
| M708T702_1 | 708. 4219461 | 702. 055 | 14497221. 03 |
| M708T576   | 708. 4184858 | 575. 878 | 3353259. 082 |
| M708T702_2 | 708. 4383183 | 702. 055 | 44217296. 38 |
| M709T466   | 709. 312592  | 466. 162 | 1045183. 196 |
| M709T574   | 709. 4454249 | 574. 363 | 7177742. 231 |
| M710T574_1 | 710. 4362439 | 574. 363 | 1442449. 431 |
| M710T574_2 | 710. 4519584 | 574. 363 | 1446409. 697 |
| M711T144_1 | 711. 1355229 | 143. 959 | 15275796. 17 |
| M711T158_1 | 711. 1354625 | 157. 773 | 9286897. 628 |
| M711T109   | 711. 1350599 | 108. 698 | 4616910. 446 |
| M711T293   | 711. 1394545 | 292. 623 | 4115448. 426 |
| M711T198   | 711. 141816  | 198. 072 | 11617149. 97 |
| M711T144_2 | 711. 1479451 | 143. 959 | 15500764. 79 |
| M711T158_2 | 711. 1489488 | 157. 773 | 9525848. 581 |
| M711T180   | 711. 1490498 | 179. 75  | 8666346. 402 |
| M711T631   | 711. 4250556 | 630. 507 | 1032031. 182 |
| M712T522_1 | 711. 8398195 | 522. 177 | 3138242. 371 |
| M712T522_2 | 711. 8569354 | 522. 177 | 8294841. 264 |
| M712T199_1 | 712. 1378255 | 199. 43  | 3195337. 556 |
| M712T144   | 712. 1458929 | 143. 959 | 3742947. 355 |
| M712T181   | 712. 149897  | 181. 154 | 1515387. 331 |
| M712T199_2 | 712. 1496586 | 199. 43  | 3119865. 737 |
| M712T143_1 | 712. 2678518 | 142. 85  | 6835379. 496 |
| M712T103_1 | 712. 2780833 | 103. 423 | 15971722. 8  |
| M712T143_2 | 712. 2791142 | 142. 85  | 29397125. 49 |
| M712T103_2 | 712. 289948  | 103. 423 | 12732567. 27 |
| M712T143_3 | 712. 2948885 | 142. 85  | 12951884. 49 |
| M712T522_3 | 712. 3667275 | 522. 177 | 2726432. 038 |
| M713T144   | 713. 2956544 | 143. 959 | 5399037. 137 |
| M713T496   | 713. 3572379 | 495. 779 | 30652320     |
| M713T512_1 | 713. 4090814 | 511. 77  | 2197300. 234 |
| M713T512_2 | 713. 4271719 | 511. 77  | 2775777. 444 |

|            |              |          |              |
|------------|--------------|----------|--------------|
| M714T462_1 | 713. 8383597 | 461. 845 | 4577700. 015 |
| M714T462_2 | 713. 8564307 | 461. 845 | 67122589. 12 |
| M714T462_3 | 713. 8719944 | 461. 845 | 35000262. 88 |
| M714T168   | 714. 1006584 | 167. 804 | 4675077. 758 |
| M714T591   | 714. 2857343 | 590. 607 | 3480631. 433 |
| M714T463   | 714. 3433286 | 463. 271 | 16072841. 08 |
| M714T462_4 | 714. 3610273 | 461. 845 | 55692806. 53 |
| M715T463_1 | 714. 8480577 | 463. 271 | 10901085. 82 |
| M715T462_1 | 714. 8639241 | 461. 845 | 22929108. 66 |
| M715T462_2 | 714. 8771396 | 461. 845 | 6606529. 491 |
| M715T411   | 715. 260068  | 410. 542 | 897793. 1823 |
| M715T463_2 | 715. 3509342 | 463. 271 | 5597694. 318 |
| M715T462_3 | 715. 3677381 | 461. 845 | 7667260. 423 |
| M715T705   | 715. 3958306 | 704. 715 | 3801577. 457 |
| M715T706   | 715. 4127518 | 706. 229 | 4076184. 73  |
| M716T286   | 716. 2681826 | 285. 9   | 1315361. 603 |
| M717T32_1  | 716. 5098503 | 32. 4171 | 474561. 3326 |
| M717T813   | 716. 5273696 | 812. 862 | 2898524. 82  |
| M717T32_2  | 716. 5252087 | 32. 4171 | 639970. 8951 |
| M717T548_1 | 717. 1920896 | 548. 114 | 4482070. 592 |
| M717T548_2 | 717. 2051489 | 548. 114 | 3114817. 282 |
| M717T669_1 | 717. 4463625 | 668. 867 | 3286465. 911 |
| M717T669_2 | 717. 4632675 | 668. 867 | 3123005. 001 |
| M718T413   | 718. 3496464 | 413. 295 | 991117. 4652 |
| M718T669_1 | 718. 4502503 | 668. 867 | 1764904. 179 |
| M718T545   | 718. 4549364 | 545. 203 | 5812284. 049 |
| M718T669_2 | 718. 4639524 | 668. 867 | 1577721. 461 |
| M720T163_1 | 720. 1283364 | 162. 728 | 10498880. 22 |
| M720T198_1 | 720. 1280874 | 198. 072 | 15042964. 39 |
| M720T144_1 | 720. 1315446 | 143. 959 | 16682586. 21 |
| M720T163_2 | 720. 1448486 | 162. 728 | 9491909. 854 |
| M720T144_2 | 720. 1452832 | 143. 959 | 14398141. 66 |
| M720T198_2 | 720. 1456741 | 198. 072 | 16060553. 95 |
| M720T502   | 720. 3622845 | 501. 549 | 6366789. 591 |
| M721T502_1 | 720. 8653072 | 501. 549 | 5370217. 209 |
| M721T144_1 | 721. 1333321 | 143. 959 | 5372472. 536 |
| M721T144_2 | 721. 1516631 | 143. 959 | 5305529. 303 |
| M721T502_2 | 721. 3691986 | 501. 549 | 1597382. 949 |
| M722T474   | 721. 8545447 | 473. 597 | 429733. 166  |
| M722T589_1 | 722. 4388537 | 589. 053 | 2696572. 757 |
| M722T589_2 | 722. 4526641 | 589. 053 | 1867878. 241 |
| M723T580_1 | 723. 4179339 | 580. 22  | 5711932. 106 |
| M723T655_1 | 723. 4212133 | 654. 542 | 1740599. 63  |
| M723T580_2 | 723. 4345591 | 580. 22  | 6772601. 145 |
| M723T655_2 | 723. 4365042 | 654. 542 | 1803897. 617 |
| M723T579   | 723. 4503698 | 578. 816 | 757271. 9686 |
| M724T305   | 724. 2725474 | 304. 777 | 2993631. 527 |
| M724T694   | 724. 3947731 | 693. 81  | 2930335. 222 |
| M724T580   | 724. 4219463 | 580. 22  | 1975236. 031 |
| M724T574   | 724. 4738044 | 574. 363 | 1217756. 729 |
| M725T794   | 724. 5846689 | 793. 649 | 1581022. 122 |
| M726T598   | 726. 2987644 | 598. 125 | 8524357. 588 |
| M726T613   | 726. 3153488 | 612. 699 | 4161190. 401 |
| M726T574_1 | 726. 4379691 | 574. 363 | 1175311. 896 |

|            |              |          |              |
|------------|--------------|----------|--------------|
| M726T816   | 726. 4513726 | 815. 517 | 2158381. 566 |
| M726T574_2 | 726. 4532946 | 574. 363 | 1505535. 534 |
| M728T535   | 727. 8794645 | 535. 329 | 4495619. 314 |
| M728T143   | 728. 2751572 | 142. 85  | 1998680. 554 |
| M728T572   | 728. 3403184 | 571. 523 | 768223. 134  |
| M729T525_1 | 728. 7883261 | 525. 132 | 3272624. 127 |
| M729T525_2 | 728. 8067045 | 525. 132 | 5239192. 363 |
| M729T524_1 | 729. 2929535 | 523. 735 | 2022246. 046 |
| M729T524_2 | 729. 311454  | 523. 735 | 1709978. 288 |
| M729T459   | 729. 3866569 | 458. 985 | 1514928. 916 |
| M729T574   | 729. 4132588 | 574. 363 | 1748505. 522 |
| M730T458   | 730. 3697106 | 457. 576 | 1354599. 429 |
| M730T703   | 730. 3859876 | 703. 35  | 1659934. 51  |
| M731T649_1 | 731. 4638052 | 649. 338 | 15500246. 98 |
| M731T703_1 | 731. 4631064 | 703. 35  | 10891319. 19 |
| M731T558   | 731. 4803106 | 557. 967 | 4548408. 003 |
| M731T649_2 | 731. 4755292 | 649. 338 | 17235233. 91 |
| M731T703_2 | 731. 4812523 | 703. 35  | 8995764. 707 |
| M732T703   | 732. 4636202 | 703. 35  | 3783540. 376 |
| M732T649   | 732. 4781387 | 649. 338 | 8284528. 74  |
| M733T334   | 733. 2679035 | 333. 715 | 4710133. 64  |
| M733T332   | 733. 2801882 | 332. 2   | 3773109. 61  |
| M733T320   | 733. 282163  | 319. 758 | 2105870. 01  |
| M734T610   | 734. 2803529 | 609. 592 | 2618906. 865 |
| M734T478_1 | 734. 3956269 | 477. 989 | 1446483. 031 |
| M734T478_2 | 734. 4117187 | 477. 989 | 1575799. 935 |
| M735T595_1 | 734. 7848291 | 595. 066 | 3608426. 906 |
| M735T652_1 | 735. 2024459 | 651. 956 | 9903320. 776 |
| M735T659_1 | 735. 2024202 | 658. 953 | 24193995. 42 |
| M735T652_2 | 735. 2213479 | 651. 956 | 21287417. 43 |
| M735T659_2 | 735. 2213237 | 658. 953 | 51434942. 01 |
| M735T595_2 | 735. 2877991 | 595. 066 | 1736567. 963 |
| M735T393   | 735. 3770217 | 392. 715 | 6167078. 932 |
| M735T716_1 | 735. 3857366 | 716. 403 | 2884483. 951 |
| M735T716_2 | 735. 401864  | 716. 403 | 2076513. 878 |
| M735T669_1 | 735. 453082  | 668. 867 | 64535656. 12 |
| M735T545_1 | 735. 4627615 | 545. 203 | 138387575. 7 |
| M735T669_2 | 735. 471997  | 668. 867 | 91786258. 21 |
| M735T545_2 | 735. 4785898 | 545. 203 | 57203778. 19 |
| M735T669_3 | 735. 4837887 | 668. 867 | 23412474. 32 |
| M736T393   | 735. 7147567 | 392. 715 | 4007046. 073 |
| M736T652_1 | 736. 2100566 | 651. 956 | 5058727. 776 |
| M736T659_1 | 736. 2098342 | 658. 953 | 12097513. 8  |
| M736T652_2 | 736. 2290049 | 651. 956 | 4184291. 731 |
| M736T659_2 | 736. 2286372 | 658. 953 | 10934717. 4  |
| M736T405   | 736. 2810366 | 404. 872 | 1822713. 15  |
| M736T403   | 736. 2935206 | 403. 447 | 1540839. 556 |
| M737T669_1 | 737. 4601775 | 668. 867 | 10761139. 44 |
| M737T669_2 | 737. 4768063 | 668. 867 | 14602719. 08 |
| M738T101_1 | 738. 2556157 | 101. 161 | 30759338. 13 |
| M738T101_2 | 738. 2701866 | 101. 161 | 28339809. 07 |
| M738T494   | 738. 3125193 | 494. 289 | 1066660. 182 |
| M738T393   | 738. 317806  | 392. 715 | 7551248. 353 |
| M738T557_1 | 738. 4360732 | 556. 816 | 3543796. 382 |

|            |              |          |              |
|------------|--------------|----------|--------------|
| M738T557_2 | 738. 4515058 | 556. 816 | 1171086. 863 |
| M739T471_1 | 739. 0251734 | 470. 602 | 592827. 4044 |
| M739T471_2 | 739. 0407461 | 470. 602 | 958694. 0291 |
| M739T582_1 | 739. 4054552 | 581. 625 | 26309997. 63 |
| M739T653_1 | 739. 4170542 | 653. 147 | 7258589. 796 |
| M739T582_2 | 739. 4173725 | 581. 625 | 76167004. 15 |
| M739T582_3 | 739. 4292904 | 581. 625 | 84564878. 95 |
| M739T653_2 | 739. 4313315 | 653. 147 | 5332870. 815 |
| M740T582_1 | 740. 4058907 | 581. 625 | 8533955. 018 |
| M740T582_2 | 740. 4196407 | 581. 625 | 29254907. 17 |
| M740T582_3 | 740. 4363613 | 581. 625 | 27516745. 26 |
| M741T214   | 741. 299153  | 213. 872 | 682121. 1555 |
| M741T555_1 | 741. 4140278 | 555. 358 | 2420551. 191 |
| M741T603_1 | 741. 4286509 | 602. 513 | 15964422. 78 |
| M741T619_1 | 741. 4284904 | 618. 683 | 4822336. 982 |
| M741T455   | 741. 4288126 | 454. 739 | 1838640. 498 |
| M741T629_1 | 741. 4283919 | 629. 015 | 6123867. 051 |
| M741T567_1 | 741. 426242  | 567. 1   | 15891330. 84 |
| M741T583_1 | 741. 4290323 | 583. 068 | 37664648. 79 |
| M741T555_2 | 741. 4307548 | 555. 358 | 63189261. 92 |
| M741T603_2 | 741. 4473815 | 602. 513 | 22485648. 12 |
| M741T555_3 | 741. 4427136 | 555. 358 | 63847166. 48 |
| M741T619_2 | 741. 4476263 | 618. 683 | 5173301. 428 |
| M741T629_2 | 741. 4469302 | 629. 015 | 7105600. 664 |
| M741T567_2 | 741. 4501732 | 567. 1   | 14255857. 6  |
| M741T583_2 | 741. 4481631 | 583. 068 | 30402890. 61 |
| M741T555_4 | 741. 4618695 | 555. 358 | 2422784. 835 |
| M742T175   | 741. 7157776 | 174. 865 | 3819966. 232 |
| M742T513   | 741. 8885966 | 513. 285 | 779204. 4647 |
| M742T308_1 | 742. 2765204 | 307. 735 | 2422973. 392 |
| M742T295   | 742. 276279  | 295. 356 | 1696497. 136 |
| M742T308_2 | 742. 2899714 | 307. 735 | 2922558. 043 |
| M742T294   | 742. 2906725 | 293. 896 | 1617998. 768 |
| M742T603   | 742. 4344132 | 602. 513 | 9378616. 159 |
| M742T619_1 | 742. 4340503 | 618. 683 | 2805917. 855 |
| M742T629_1 | 742. 432165  | 629. 015 | 3353915. 95  |
| M742T567_1 | 742. 4345382 | 567. 1   | 8017783. 019 |
| M742T583_1 | 742. 4346313 | 583. 068 | 16674389. 14 |
| M742T555   | 742. 4394031 | 555. 358 | 28802997     |
| M742T619_2 | 742. 4483936 | 618. 683 | 3092865. 281 |
| M742T601   | 742. 4479597 | 601. 04  | 9535211. 865 |
| M742T567_2 | 742. 4489286 | 567. 1   | 8046091. 903 |
| M742T583_2 | 742. 4481786 | 583. 068 | 18327354. 97 |
| M742T629_2 | 742. 4513473 | 629. 015 | 3256459. 473 |
| M743T555_1 | 743. 437965  | 555. 358 | 5505439. 429 |
| M743T601_1 | 743. 4378655 | 601. 04  | 1969676. 522 |
| M743T583_1 | 743. 438097  | 583. 068 | 4416466. 702 |
| M743T601_2 | 743. 4530834 | 601. 04  | 1929011. 511 |
| M743T583_2 | 743. 4524659 | 583. 068 | 4449702. 419 |
| M743T555_2 | 743. 4571645 | 555. 358 | 3121931. 118 |
| M744T494   | 744. 2793325 | 494. 289 | 686240. 0617 |
| M744T491   | 744. 2940876 | 491. 373 | 213784. 3367 |
| M744T461   | 744. 3505521 | 460. 537 | 618425. 1092 |
| M745T651   | 745. 3250396 | 650. 898 | 7625288. 576 |

|            |              |          |              |
|------------|--------------|----------|--------------|
| M745T649   | 745. 3406987 | 649. 338 | 13805424. 13 |
| M745T589_1 | 745. 4464955 | 589. 053 | 22681343. 88 |
| M745T589_2 | 745. 4585539 | 589. 053 | 18165330. 54 |
| M746T651   | 746. 3300176 | 650. 898 | 2788908. 216 |
| M746T649   | 746. 3494232 | 649. 338 | 2886965. 414 |
| M747T589_1 | 747. 4432811 | 589. 053 | 1250412. 235 |
| M747T701   | 747. 4456141 | 700. 758 | 1982938. 461 |
| M747T589_2 | 747. 4577704 | 589. 053 | 3817009. 465 |
| M747T698   | 747. 4628952 | 697. 952 | 2556048. 394 |
| M747T690   | 747. 4626978 | 689. 5   | 2668400. 546 |
| M748T608   | 748. 4176881 | 608. 261 | 2093073. 149 |
| M748T607   | 748. 4330082 | 606. 774 | 701722. 5914 |
| M749T293_1 | 749. 2026419 | 292. 623 | 3851363. 519 |
| M749T216_1 | 749. 2054093 | 216. 359 | 3880372. 612 |
| M749T293_2 | 749. 2196593 | 292. 623 | 4484599. 825 |
| M749T216_2 | 749. 2191699 | 216. 359 | 5328151. 912 |
| M749T703_1 | 749. 4618697 | 703. 35  | 44413801. 21 |
| M749T649_1 | 749. 4656271 | 649. 338 | 108114704. 3 |
| M749T682_1 | 749. 4657661 | 681. 885 | 41555881. 37 |
| M749T792   | 749. 4641268 | 792. 146 | 4851565. 181 |
| M749T620_1 | 749. 4776488 | 620. 172 | 8769020. 917 |
| M749T719_1 | 749. 4751338 | 719. 215 | 27310645. 55 |
| M749T703_2 | 749. 4754371 | 703. 35  | 196288088. 3 |
| M749T632_1 | 749. 477177  | 631. 982 | 14585880. 61 |
| M749T791_1 | 749. 4829385 | 790. 802 | 16026886. 24 |
| M749T558   | 749. 4828406 | 557. 967 | 65897677. 17 |
| M749T649_2 | 749. 4777849 | 649. 338 | 213773676. 9 |
| M749T682_2 | 749. 4779246 | 681. 885 | 80697529. 49 |
| M749T620_2 | 749. 4901019 | 620. 172 | 6553173. 82  |
| M749T719_2 | 749. 4872864 | 719. 215 | 19678288. 18 |
| M749T703_3 | 749. 4875961 | 703. 35  | 143947645. 4 |
| M749T632_2 | 749. 4895395 | 631. 982 | 10962314. 35 |
| M749T791_2 | 749. 496326  | 790. 802 | 3049570. 898 |
| M749T649_3 | 749. 4899435 | 649. 338 | 166671608. 4 |
| M749T682_3 | 749. 4900844 | 681. 885 | 62093034. 37 |
| M750T215_1 | 749. 7085519 | 215. 068 | 4171126. 543 |
| M750T215_2 | 749. 7231544 | 215. 068 | 3785226. 3   |
| M750T211_1 | 750. 2170329 | 211. 288 | 3349348. 886 |
| M750T171   | 750. 2349744 | 170. 665 | 13925223. 1  |
| M750T276   | 750. 2320351 | 276. 414 | 7136011. 033 |
| M750T211_2 | 750. 2365169 | 211. 288 | 7230428. 395 |
| M750T102_1 | 750. 2458074 | 102. 247 | 9352377. 18  |
| M750T102_2 | 750. 2614603 | 102. 247 | 21636425. 83 |
| M750T740_1 | 750. 3735723 | 740. 014 | 2811034. 379 |
| M750T740_2 | 750. 3930318 | 740. 014 | 2115109. 904 |
| M750T558_1 | 750. 4664198 | 557. 967 | 7049200. 611 |
| M750T703_1 | 750. 4637323 | 703. 35  | 17195503. 82 |
| M750T649_1 | 750. 4711656 | 649. 338 | 49112755. 4  |
| M750T703_2 | 750. 4809706 | 703. 35  | 81729282. 76 |
| M750T558_2 | 750. 4859044 | 557. 967 | 29419550     |
| M750T649_2 | 750. 4857832 | 649. 338 | 101335975. 4 |
| M750T703_3 | 750. 4972165 | 703. 35  | 38957741. 04 |
| M750T649_3 | 750. 4979651 | 649. 338 | 47554965. 34 |
| M751T210_1 | 750. 7247581 | 210. 186 | 4108830. 107 |

|            |              |          |              |
|------------|--------------|----------|--------------|
| M751T276_1 | 750. 723843  | 276. 414 | 4350702. 92  |
| M751T210_2 | 750. 7393788 | 210. 186 | 4170060. 324 |
| M751T276_2 | 750. 7391191 | 276. 414 | 4525061. 533 |
| M751T276_3 | 751. 2221549 | 276. 414 | 1724575. 687 |
| M751T278   | 751. 2416934 | 277. 699 | 1857918. 001 |
| M751T212   | 751. 2419226 | 212. 448 | 663307. 3555 |
| M751T102_1 | 751. 2560568 | 102. 247 | 3397364. 186 |
| M751T102_2 | 751. 2720224 | 102. 247 | 4350789. 918 |
| M751T321_1 | 751. 2765047 | 321. 198 | 12715028. 78 |
| M751T321_2 | 751. 2908473 | 321. 198 | 15363264. 05 |
| M751T814_1 | 751. 3787498 | 814. 095 | 6178262. 508 |
| M751T814_2 | 751. 3982824 | 814. 095 | 48283296. 01 |
| M751T649_1 | 751. 4756997 | 649. 338 | 16600445. 12 |
| M751T452   | 751. 4754813 | 451. 804 | 1834776. 692 |
| M751T703   | 751. 4863624 | 703. 35  | 22420642. 95 |
| M751T649_2 | 751. 4906049 | 649. 338 | 24253638. 22 |
| M752T703_1 | 751. 5023557 | 703. 35  | 7682833. 783 |
| M752T103_1 | 752. 2715112 | 103. 423 | 47825860. 41 |
| M752T103_2 | 752. 2929916 | 103. 423 | 15902897. 22 |
| M752T452_1 | 752. 4536249 | 451. 804 | 2218346. 095 |
| M752T452_2 | 752. 473177  | 451. 804 | 2054585. 666 |
| M752T649_1 | 752. 4784927 | 649. 338 | 3475398. 045 |
| M752T703_2 | 752. 482723  | 703. 35  | 3389591. 293 |
| M752T649_2 | 752. 4974395 | 649. 338 | 3523176. 108 |
| M753T659_1 | 753. 21222   | 658. 953 | 5260793. 637 |
| M753T659_2 | 753. 2295678 | 658. 953 | 12526613. 87 |
| M753T103_1 | 753. 2757477 | 103. 423 | 12719155. 3  |
| M753T103_2 | 753. 2895375 | 103. 423 | 10961661. 55 |
| M753T814_1 | 753. 4036618 | 814. 095 | 9303685. 41  |
| M753T814_2 | 753. 4220118 | 814. 095 | 5768725. 913 |
| M753T669   | 753. 4524915 | 668. 867 | 7996248. 507 |
| M753T545_1 | 753. 4586455 | 545. 203 | 44249689. 76 |
| M753T545_2 | 753. 4782582 | 545. 203 | 152780941. 9 |
| M754T659   | 754. 2280397 | 658. 953 | 3077518. 705 |
| M754T814_1 | 754. 4095207 | 814. 095 | 2577473. 655 |
| M754T814_2 | 754. 4231239 | 814. 095 | 2523754. 921 |
| M754T610_1 | 754. 4298065 | 609. 592 | 2969084. 779 |
| M754T484   | 754. 4281315 | 483. 973 | 4830358. 899 |
| M754T502   | 754. 4279351 | 501. 549 | 17569791. 23 |
| M754T500   | 754. 4427237 | 500. 045 | 21712440. 77 |
| M754T610_2 | 754. 4479256 | 609. 592 | 16685239. 49 |
| M754T545_1 | 754. 4623477 | 545. 203 | 23444542. 39 |
| M754T545_2 | 754. 4797313 | 545. 203 | 68920274. 2  |
| M755T660   | 755. 2264312 | 660. 455 | 887817. 8082 |
| M755T535   | 755. 4129806 | 535. 329 | 3999577. 672 |
| M755T503   | 755. 4288702 | 503. 046 | 4756817. 846 |
| M755T610_1 | 755. 4375077 | 609. 592 | 2849063. 484 |
| M755T500   | 755. 443345  | 500. 045 | 8652193. 846 |
| M755T610_2 | 755. 4571697 | 609. 592 | 6415638. 009 |
| M755T670   | 755. 4954468 | 670. 166 | 4738087. 578 |
| M756T275   | 756. 2702324 | 274. 968 | 1887628. 794 |
| M756T497_1 | 756. 4342581 | 497. 214 | 2640063. 707 |
| M756T504_1 | 756. 4347001 | 504. 466 | 2574569. 041 |
| M756T610_1 | 756. 4483003 | 609. 592 | 1089571. 905 |

|            |              |          |              |
|------------|--------------|----------|--------------|
| M756T497_2 | 756. 4536941 | 497. 214 | 8875491. 039 |
| M756T504_2 | 756. 4536853 | 504. 466 | 5373327. 294 |
| M756T610_2 | 756. 4631029 | 609. 592 | 793317. 5106 |
| M757T497   | 757. 4422186 | 497. 214 | 2306386. 624 |
| M758T172_1 | 758. 19601   | 171. 935 | 18065712. 71 |
| M758T151_1 | 758. 1958709 | 151. 016 | 10133145. 96 |
| M758T211_1 | 758. 1959607 | 211. 288 | 16796196. 06 |
| M758T187_1 | 758. 2105346 | 186. 709 | 28726361. 12 |
| M758T294_1 | 758. 210725  | 293. 896 | 32054532. 97 |
| M758T172_2 | 758. 2105314 | 171. 935 | 50219128. 38 |
| M758T151_2 | 758. 2109268 | 151. 016 | 31302578. 18 |
| M758T276_1 | 758. 2105859 | 276. 414 | 45664804. 23 |
| M758T211_2 | 758. 2108088 | 211. 288 | 52414455. 82 |
| M758T187_2 | 758. 2278595 | 186. 709 | 37614986. 37 |
| M758T294_2 | 758. 2255741 | 293. 896 | 38186499. 24 |
| M758T172_3 | 758. 2278102 | 171. 935 | 47446778. 71 |
| M758T276_2 | 758. 2254331 | 276. 414 | 55395563. 35 |
| M758T211_3 | 758. 2281277 | 211. 288 | 47048565. 68 |
| M758T151_3 | 758. 2307257 | 151. 016 | 26463124. 38 |
| M759T294_1 | 758. 7086622 | 293. 896 | 10997137. 86 |
| M759T276_1 | 758. 7081852 | 276. 414 | 14962734. 83 |
| M759T187_1 | 758. 7116314 | 186. 709 | 22399030. 25 |
| M759T110   | 758. 7125121 | 110. 047 | 5267077. 457 |
| M759T172_1 | 758. 7172639 | 171. 935 | 34560312. 67 |
| M759T151_1 | 758. 7171568 | 151. 016 | 22787600. 76 |
| M759T211_1 | 758. 7107741 | 211. 288 | 26922869. 17 |
| M759T187_2 | 758. 7281828 | 186. 709 | 17556069. 63 |
| M759T293   | 758. 7272425 | 292. 623 | 22319258. 83 |
| M759T172_2 | 758. 7297209 | 171. 935 | 28661434. 46 |
| M759T151_2 | 758. 7301214 | 151. 016 | 18708247. 02 |
| M759T276_2 | 758. 7279997 | 276. 414 | 29302013. 99 |
| M759T211_2 | 758. 7281081 | 211. 288 | 29343463. 52 |
| M759T211_3 | 758. 742002  | 211. 288 | 8709439. 721 |
| M759T274   | 758. 7540451 | 273. 531 | 1193919. 143 |
| M759T608   | 759. 1914146 | 608. 261 | 5318591. 237 |
| M759T276_3 | 759. 2108851 | 276. 414 | 17437682. 13 |
| M759T185_1 | 759. 2174002 | 185. 398 | 7464711. 565 |
| M759T210   | 759. 2169049 | 210. 186 | 16855754. 5  |
| M759T154   | 759. 2130362 | 153. 785 | 6851288. 061 |
| M759T172_3 | 759. 2236345 | 171. 935 | 16893023. 67 |
| M759T185_2 | 759. 2307978 | 185. 398 | 7132835. 477 |
| M759T294_2 | 759. 2317004 | 293. 896 | 7427808. 684 |
| M759T152   | 759. 2305138 | 152. 375 | 7528398. 957 |
| M759T276_4 | 759. 2320844 | 276. 414 | 11929534. 02 |
| M759T211_4 | 759. 2315982 | 211. 288 | 14299779. 82 |
| M759T172_4 | 759. 2374748 | 171. 935 | 4203583. 53  |
| M759T294_3 | 759. 2466736 | 293. 896 | 778235. 934  |
| M759T276_5 | 759. 2465644 | 276. 414 | 1775716. 576 |
| M759T425   | 759. 3746874 | 424. 572 | 5109612. 597 |
| M760T426   | 759. 7010278 | 425. 909 | 2063079. 366 |
| M760T294_1 | 759. 7148066 | 293. 896 | 2489291. 566 |
| M760T172_1 | 759. 7135295 | 171. 935 | 3753422. 827 |
| M760T211   | 759. 7150876 | 211. 288 | 3160783. 357 |
| M760T276   | 759. 7194926 | 276. 414 | 4866710. 456 |

|            |              |          |              |
|------------|--------------|----------|--------------|
| M760T294_2 | 759. 7297353 | 293. 896 | 2735043. 325 |
| M760T172_2 | 759. 7301535 | 171. 935 | 4474673. 831 |
| M760T210   | 759. 7319363 | 210. 186 | 3616171. 272 |
| M760T275   | 760. 2307187 | 274. 968 | 705833. 2562 |
| M760T212   | 760. 2286591 | 212. 448 | 751871. 8343 |
| M760T219   | 760. 2460252 | 219. 233 | 1165470. 332 |
| M760T106_1 | 760. 2857099 | 105. 503 | 7784247. 328 |
| M760T295_1 | 760. 2911136 | 295. 356 | 7011279. 615 |
| M760T106_2 | 760. 3026837 | 105. 503 | 7659174. 959 |
| M760T295_2 | 760. 3035602 | 295. 356 | 4141516. 648 |
| M761T524_1 | 760. 6785852 | 523. 735 | 1921235. 737 |
| M761T524_2 | 760. 692679  | 523. 735 | 866392. 8595 |
| M761T274   | 760. 7233267 | 273. 531 | 494568. 5893 |
| M763T82    | 762. 6526574 | 82. 0569 | 8644662. 008 |
| M763T456   | 763. 3918525 | 456. 126 | 1119415. 262 |
| M763T813   | 763. 413732  | 812. 862 | 2718642. 445 |
| M763T588_1 | 763. 4468123 | 587. 521 | 3854259. 538 |
| M763T588_2 | 763. 4664273 | 587. 521 | 5949313. 375 |
| M764T104_1 | 764. 2650746 | 104. 493 | 13421210. 56 |
| M764T104_2 | 764. 2818959 | 104. 493 | 27201736. 97 |
| M764T694   | 764. 4292773 | 693. 81  | 2881109. 583 |
| M764T588   | 764. 4729944 | 587. 521 | 1688102. 436 |
| M765T641_1 | 764. 5238886 | 640. 717 | 1457989. 482 |
| M765T641_2 | 764. 5411043 | 640. 717 | 278506. 4028 |
| M765T519   | 765. 3609439 | 519. 257 | 2349877. 562 |
| M765T465_1 | 765. 4607018 | 464. 668 | 2057463. 825 |
| M765T597_1 | 765. 4641543 | 596. 628 | 9549756. 644 |
| M765T563_1 | 765. 4692112 | 563. 297 | 49811655. 76 |
| M765T647_1 | 765. 471409  | 646. 794 | 29552755. 37 |
| M765T706_1 | 765. 4696539 | 706. 229 | 8831613. 773 |
| M765T465_2 | 765. 4807521 | 464. 668 | 4388186. 965 |
| M765T597_2 | 765. 4767045 | 596. 628 | 12152792. 96 |
| M765T647_2 | 765. 4842792 | 646. 794 | 8191085. 692 |
| M765T653   | 765. 4839446 | 653. 147 | 8455773. 495 |
| M765T563_2 | 765. 481766  | 563. 297 | 39225033. 43 |
| M765T638   | 765. 4838401 | 637. 996 | 6719087. 499 |
| M765T706_2 | 765. 4813883 | 706. 229 | 7211505. 546 |
| M766T521_1 | 765. 6642046 | 520. 739 | 2491114. 029 |
| M766T519_1 | 765. 6824965 | 519. 257 | 9375253. 616 |
| M766T150   | 765. 7024552 | 149. 65  | 1504077. 521 |
| M766T519_2 | 766. 0039619 | 519. 257 | 4116023. 148 |
| M766T521_2 | 766. 03746   | 520. 739 | 293359. 17   |
| M766T171_1 | 766. 1951708 | 170. 665 | 9026726. 786 |
| M766T211   | 766. 1893532 | 211. 288 | 4413632. 537 |
| M766T293   | 766. 2000245 | 292. 623 | 12521411. 24 |
| M766T276_1 | 766. 1955651 | 276. 414 | 10300023. 44 |
| M766T187   | 766. 2040076 | 186. 709 | 14892248. 77 |
| M766T210_1 | 766. 2047556 | 210. 186 | 16318949. 19 |
| M766T171_2 | 766. 2156649 | 170. 665 | 10241594. 51 |
| M766T276_2 | 766. 2106442 | 276. 414 | 15090384. 31 |
| M766T294   | 766. 2177454 | 293. 896 | 6938298. 406 |
| M766T210_2 | 766. 2204626 | 210. 186 | 4635650. 31  |
| M766T109_1 | 766. 2842769 | 108. 698 | 7904200. 418 |
| M766T188_1 | 766. 2910427 | 188. 126 | 20868874. 7  |



|            |              |          |              |
|------------|--------------|----------|--------------|
| M766T109_2 | 766. 2992702 | 108. 698 | 8915774. 851 |
| M766T188_2 | 766. 3060211 | 188. 126 | 9649990. 897 |
| M766T519_3 | 766. 3360571 | 519. 257 | 1582696. 508 |
| M766T565_1 | 766. 4697559 | 564. 534 | 19880073. 86 |
| M766T652   | 766. 4685191 | 651. 956 | 5014480. 948 |
| M766T565_2 | 766. 4862861 | 564. 534 | 15442753. 02 |
| M767T275_1 | 766. 693685  | 274. 968 | 3572099. 092 |
| M767T172_1 | 766. 7034579 | 171. 935 | 10775105. 87 |
| M767T151_1 | 766. 6980597 | 151. 016 | 4899936. 016 |
| M767T211_1 | 766. 700743  | 211. 288 | 10742191. 71 |
| M767T172_2 | 766. 7189389 | 171. 935 | 5281370. 029 |
| M767T150   | 766. 7131317 | 149. 65  | 5862071. 524 |
| M767T275_2 | 766. 7132599 | 274. 968 | 7627794. 249 |
| M767T211_2 | 766. 7132631 | 211. 288 | 9575156. 294 |
| M767T172_3 | 767. 1973954 | 171. 935 | 3063168. 31  |
| M767T278   | 767. 1943753 | 277. 699 | 3408666. 25  |
| M767T210   | 767. 206525  | 210. 186 | 4614261. 01  |
| M767T172_4 | 767. 2099628 | 171. 935 | 6662061. 171 |
| M767T151_2 | 767. 2092904 | 151. 016 | 3446504. 971 |
| M767T163   | 767. 221757  | 162. 728 | 6487660. 051 |
| M767T143   | 767. 2214976 | 142. 85  | 7165345. 32  |
| M767T276   | 767. 2171323 | 276. 414 | 3438644. 627 |
| M767T190_1 | 767. 2926624 | 189. 571 | 5289302. 217 |
| M767T190_2 | 767. 3052493 | 189. 571 | 4583513. 19  |
| M767T669   | 767. 3422252 | 668. 867 | 2292425. 494 |
| M767T558_1 | 767. 4699015 | 557. 967 | 13258292. 02 |
| M767T703_1 | 767. 4662176 | 703. 35  | 31299786. 74 |
| M767T649_1 | 767. 4716669 | 649. 338 | 92866441. 23 |
| M767T682_1 | 767. 4717732 | 681. 885 | 13591557. 41 |
| M767T719_1 | 767. 4813968 | 719. 215 | 33625307. 23 |
| M767T703_2 | 767. 4816999 | 703. 35  | 340586006. 9 |
| M767T792_1 | 767. 4792058 | 792. 146 | 6478204. 842 |
| M767T558_2 | 767. 4893963 | 557. 967 | 83080358     |
| M767T649_2 | 767. 4842659 | 649. 338 | 268154498. 1 |
| M767T682_2 | 767. 484373  | 681. 885 | 39219912. 67 |
| M767T649_3 | 767. 4968663 | 649. 338 | 298724212    |
| M767T682_3 | 767. 4969741 | 681. 885 | 42975549. 54 |
| M767T719_2 | 767. 4965178 | 719. 215 | 36380879. 22 |
| M767T703_3 | 767. 4968213 | 703. 35  | 372580271. 1 |
| M767T792_2 | 767. 4993268 | 792. 146 | 7924312. 788 |
| M768T649_1 | 767. 5119836 | 649. 338 | 49346397. 42 |
| M768T682   | 767. 5104013 | 681. 885 | 6695059. 038 |
| M768T719   | 767. 5109135 | 719. 215 | 5766618. 453 |
| M768T703_1 | 767. 5119365 | 703. 35  | 62631921. 42 |
| M768T163   | 767. 7205303 | 162. 728 | 3684117. 564 |
| M768T143_1 | 767. 7207829 | 142. 85  | 3360386. 647 |
| M768T143_2 | 767. 7341242 | 142. 85  | 3692298. 589 |
| M768T703_2 | 767. 9785965 | 703. 35  | 13498473. 01 |
| M768T703_3 | 767. 9987822 | 703. 35  | 25691235. 02 |
| M768T102_1 | 768. 2535327 | 102. 247 | 3838863. 536 |
| M768T102_2 | 768. 2711574 | 102. 247 | 14229412. 92 |
| M768T102_3 | 768. 2844542 | 102. 247 | 4750128. 845 |
| M768T188   | 768. 2961458 | 188. 126 | 1533350. 812 |
| M768T490   | 768. 4528008 | 489. 826 | 576697. 1254 |

|            |              |          |              |
|------------|--------------|----------|--------------|
| M768T649_2 | 768. 468848  | 649. 338 | 20838604. 66 |
| M768T703_4 | 768. 470756  | 703. 35  | 24049253. 97 |
| M768T632   | 768. 4805009 | 631. 982 | 4963003. 537 |
| M768T649_3 | 768. 4808902 | 649. 338 | 93985761. 03 |
| M768T703_5 | 768. 4833786 | 703. 35  | 107124053. 2 |
| M768T649_4 | 768. 4935121 | 649. 338 | 148237482. 6 |
| M768T703_6 | 768. 4985276 | 703. 35  | 156486123. 6 |
| M769T649_1 | 768. 50918   | 649. 338 | 48724241. 74 |
| M769T633   | 768. 5108476 | 633. 476 | 2819910. 86  |
| M769T559   | 768. 5165054 | 559. 459 | 1042724. 809 |
| M769T703_1 | 768. 51562   | 703. 35  | 23965531. 03 |
| M769T703_2 | 768. 9992851 | 703. 35  | 4103105. 622 |
| M769T321   | 769. 3020316 | 321. 198 | 1457860. 077 |
| M769T313   | 769. 3026693 | 312. 85  | 1752312. 923 |
| M769T703_3 | 769. 4801732 | 703. 35  | 11725451. 4  |
| M769T649_2 | 769. 4872413 | 649. 338 | 33648716. 11 |
| M769T703_4 | 769. 4999438 | 703. 35  | 44613017. 62 |
| M770T649_1 | 769. 504946  | 649. 338 | 29780399. 68 |
| M770T703_1 | 769. 5148352 | 703. 35  | 9010898. 227 |
| M770T459_1 | 770. 4643159 | 458. 985 | 891464. 2965 |
| M770T459_2 | 770. 4817505 | 458. 985 | 728757. 1195 |
| M770T649_2 | 770. 4875694 | 649. 338 | 4846251. 45  |
| M770T703_2 | 770. 4895916 | 703. 35  | 6556425. 284 |
| M771T649   | 770. 5027286 | 649. 338 | 8162588. 31  |
| M771T703   | 770. 5100693 | 703. 35  | 6626595. 955 |
| M771T459   | 771. 4985014 | 458. 985 | 984727. 7014 |
| M774T104   | 774. 2584327 | 104. 493 | 2616585. 889 |
| M775T836   | 774. 5676487 | 836. 034 | 2619339. 328 |
| M775T306_1 | 775. 2398531 | 306. 247 | 3763603. 799 |
| M775T316_1 | 775. 2403276 | 315. 701 | 2556694. 497 |
| M775T306_2 | 775. 255167  | 306. 247 | 3027723. 337 |
| M775T316_2 | 775. 255665  | 315. 701 | 1919552. 293 |
| M775T432_1 | 775. 4362904 | 431. 64  | 2632053. 553 |
| M775T432_2 | 775. 4561422 | 431. 64  | 1674185. 034 |
| M776T305   | 776. 2442075 | 304. 777 | 731516. 5833 |
| M776T164   | 776. 2724734 | 163. 846 | 1696029. 995 |
| M776T165   | 776. 2860111 | 165. 217 | 1177640. 868 |
| M776T653   | 776. 4084961 | 653. 147 | 2288585. 933 |
| M776T432_1 | 776. 4388057 | 431. 64  | 1101493. 072 |
| M776T432_2 | 776. 4550896 | 431. 64  | 1045761. 867 |
| M776T545   | 776. 454698  | 545. 203 | 3219494. 415 |
| M777T573_1 | 777. 3015751 | 573. 072 | 2993639. 845 |
| M777T573_2 | 777. 3170322 | 573. 072 | 1764726. 835 |
| M778T669   | 777. 502608  | 668. 867 | 4019953. 752 |
| M778T298   | 778. 2993616 | 298. 135 | 4887907. 429 |
| M778T572_1 | 778. 3045323 | 571. 523 | 815716. 2983 |
| M778T299   | 778. 3121983 | 299. 493 | 3422492. 145 |
| M778T572_2 | 778. 3195404 | 571. 523 | 505218. 8194 |
| M779T533   | 779. 4185555 | 532. 526 | 1129740. 707 |
| M779T582   | 779. 4303609 | 581. 625 | 275685. 6491 |
| M780T212   | 780. 1746845 | 212. 448 | 828360. 7242 |
| M780T308_1 | 780. 2882494 | 307. 735 | 8080546. 623 |
| M780T308_2 | 780. 3011011 | 307. 735 | 29885268. 93 |
| M780T308_3 | 780. 3166004 | 307. 735 | 32307614. 39 |

|            |              |          |              |
|------------|--------------|----------|--------------|
| M781T620   | 781. 273063  | 620. 172 | 4321201. 088 |
| M781T308_1 | 781. 3043947 | 307. 735 | 9471525. 063 |
| M781T308_2 | 781. 3199248 | 307. 735 | 10167219. 98 |
| M781T591   | 781. 4816574 | 590. 607 | 2907359. 208 |
| M782T104   | 782. 2837789 | 104. 493 | 4017211. 319 |
| M782T308   | 782. 3147959 | 307. 735 | 3056802. 004 |
| M783T834   | 782. 5742031 | 834. 486 | 4924277. 976 |
| M783T462_1 | 783. 0125102 | 461. 845 | 1118340. 858 |
| M783T462_2 | 783. 0255154 | 461. 845 | 1713342. 251 |
| M783T804_1 | 783. 3595359 | 804. 327 | 3411303. 318 |
| M783T804_2 | 783. 3801199 | 804. 327 | 9061898. 395 |
| M783T574_1 | 783. 4680748 | 574. 363 | 7647445. 738 |
| M783T537_1 | 783. 4686406 | 536. 761 | 16197171. 28 |
| M783T562_1 | 783. 4736956 | 561. 955 | 41785756. 9  |
| M783T613_1 | 783. 4685805 | 612. 699 | 7400236. 226 |
| M783T537_2 | 783. 4944375 | 536. 761 | 20709470. 64 |
| M783T652   | 783. 4939334 | 651. 956 | 4673116. 709 |
| M783T574_2 | 783. 4992097 | 574. 363 | 9997352. 331 |
| M783T562_2 | 783. 499153  | 561. 955 | 51273216. 04 |
| M783T613_2 | 783. 4996496 | 612. 699 | 8792666. 796 |
| M784T109   | 784. 2906171 | 108. 698 | 6250121. 326 |
| M784T537   | 784. 4681614 | 536. 761 | 2064792. 075 |
| M784T545   | 784. 4726627 | 545. 203 | 1413815. 987 |
| M784T563   | 784. 4779075 | 563. 297 | 21147574. 41 |
| M784T562   | 784. 4935241 | 561. 955 | 32047454. 62 |
| M784T649   | 784. 4990239 | 649. 338 | 6947986. 955 |
| M785T703_1 | 784. 5069506 | 703. 35  | 11651125. 75 |
| M785T649_1 | 784. 5198763 | 649. 338 | 24841291. 31 |
| M785T559   | 784. 5244973 | 559. 459 | 8685331. 276 |
| M785T703_2 | 784. 5277441 | 703. 35  | 10434410. 43 |
| M785T622_1 | 785. 375449  | 621. 708 | 9147794. 927 |
| M785T622_2 | 785. 3910961 | 621. 708 | 9385343. 316 |
| M785T530   | 785. 3966297 | 529. 713 | 1573163. 029 |
| M785T620   | 785. 4051166 | 620. 172 | 2663914. 954 |
| M785T649_2 | 785. 4816795 | 649. 338 | 42667706. 5  |
| M785T562   | 785. 4894275 | 561. 955 | 4571259. 822 |
| M785T649_3 | 785. 4936023 | 649. 338 | 130069145. 6 |
| M785T632   | 785. 4941988 | 631. 982 | 10550372. 78 |
| M786T649_1 | 785. 5092575 | 649. 338 | 102077709. 4 |
| M786T632   | 785. 5098454 | 631. 982 | 8098279. 632 |
| M786T530_1 | 785. 8680363 | 529. 713 | 1141945. 899 |
| M786T530_2 | 785. 8863431 | 529. 713 | 2627130. 366 |
| M786T620_1 | 786. 3778563 | 620. 172 | 3602987. 798 |
| M786T620_2 | 786. 3935625 | 620. 172 | 3849510. 993 |
| M786T649_2 | 786. 4853515 | 649. 338 | 20831741. 46 |
| M786T649_3 | 786. 4971677 | 649. 338 | 62083299. 08 |
| M787T649   | 786. 5128513 | 649. 338 | 49026802. 94 |
| M787T648   | 787. 4921823 | 648. 026 | 6554863. 779 |
| M787T656   | 787. 4917046 | 655. 9   | 6217186. 55  |
| M788T649   | 787. 5132031 | 649. 338 | 15792597. 63 |
| M788T656   | 788. 4696603 | 655. 9   | 1703593. 443 |
| M789T522   | 789. 0092603 | 522. 177 | 1720604. 566 |
| M789T456   | 789. 3510351 | 456. 126 | 2335056. 941 |
| M789T796_1 | 789. 3661059 | 796. 474 | 3367666. 302 |

|            |              |          |              |
|------------|--------------|----------|--------------|
| M789T796_2 | 789. 3777593 | 796. 474 | 2013851      |
| M789T649_1 | 789. 4606191 | 649. 338 | 5445996      |
| M789T559   | 789. 4607145 | 559. 459 | 2882233. 234 |
| M789T703_1 | 789. 4609407 | 703. 35  | 7968571. 173 |
| M789T649_2 | 789. 4816414 | 649. 338 | 6053552. 968 |
| M789T703_2 | 789. 488082  | 703. 35  | 3058253. 091 |
| M790T522_1 | 789. 6817132 | 522. 177 | 2592653. 521 |
| M790T522_2 | 789. 7027743 | 522. 177 | 2646545. 286 |
| M790T703   | 790. 4873536 | 703. 35  | 2556014. 468 |
| M791T659   | 791. 16517   | 658. 953 | 3049116. 622 |
| M792T477   | 792. 3939188 | 476. 554 | 1601599. 964 |
| M793T605   | 793. 453539  | 605. 264 | 3181955. 928 |
| M794T430   | 794. 3757686 | 430. 131 | 421496. 0879 |
| M794T702   | 794. 4384713 | 702. 055 | 1899431. 069 |
| M794T605   | 794. 4593289 | 605. 264 | 2164035. 438 |
| M795T528   | 795. 3430228 | 528. 185 | 736858. 6104 |
| M796T528_1 | 795. 8097444 | 528. 185 | 2235970. 68  |
| M796T528_2 | 795. 8309383 | 528. 185 | 3527232. 648 |
| M798T531_1 | 797. 8859938 | 531. 127 | 2282988. 721 |
| M798T531_2 | 797. 9072906 | 531. 127 | 3149396. 658 |
| M798T427_1 | 798. 0482129 | 427. 362 | 3266224. 961 |
| M798T653   | 798. 3661389 | 653. 147 | 3886723. 615 |
| M798T427_2 | 798. 3871141 | 427. 362 | 2214464. 342 |
| M798T655   | 798. 3875073 | 654. 542 | 3071104. 485 |
| M799T595_1 | 799. 4343739 | 595. 066 | 14217058. 68 |
| M799T595_2 | 799. 4477617 | 595. 066 | 15360702. 67 |
| M799T595_3 | 799. 4659468 | 595. 066 | 2536513. 272 |
| M799T622   | 799. 4740046 | 621. 708 | 938961. 0273 |
| M800T773_1 | 800. 3973308 | 773. 437 | 3359037. 187 |
| M800T773_2 | 800. 4186684 | 773. 437 | 4744839. 239 |
| M800T595_1 | 800. 4346098 | 595. 066 | 4226569. 375 |
| M800T595_2 | 800. 4560649 | 595. 066 | 5459645. 291 |
| M801T541   | 801. 477952  | 541. 275 | 7557018. 131 |
| M801T562   | 801. 4879314 | 561. 955 | 34948948. 96 |
| M802T649   | 801. 503771  | 649. 338 | 8298123. 829 |
| M802T459_1 | 802. 0621487 | 458. 985 | 744806. 3157 |
| M802T459_2 | 802. 0743236 | 458. 985 | 743420. 8514 |
| M802T528_1 | 802. 2907923 | 528. 185 | 2220735. 23  |
| M802T528_2 | 802. 3116481 | 528. 185 | 4590523. 357 |
| M803T528_1 | 802. 7970165 | 528. 185 | 3271323. 83  |
| M803T528_2 | 802. 8078465 | 528. 185 | 4695031. 878 |
| M803T111_1 | 803. 1303645 | 111. 382 | 3979931. 369 |
| M803T111_2 | 803. 1464871 | 111. 382 | 3824592. 017 |
| M804T804_1 | 804. 3417007 | 804. 327 | 2854266. 605 |
| M804T804_2 | 804. 3632794 | 804. 327 | 3155901. 567 |
| M804T682_1 | 804. 4703654 | 681. 885 | 1743598. 372 |
| M804T682_2 | 804. 4829804 | 681. 885 | 1430704. 244 |
| M805T91_1  | 805. 304865  | 90. 7088 | 4204776. 887 |
| M805T91_2  | 805. 3156948 | 90. 7088 | 6278057. 875 |
| M806T682_1 | 806. 4168477 | 681. 885 | 1757443. 962 |
| M806T682_2 | 806. 4331349 | 681. 885 | 1488248. 399 |
| M807T785_1 | 806. 5559145 | 785. 136 | 5354724. 179 |
| M807T836_1 | 806. 5562866 | 836. 034 | 18163903. 95 |
| M807T796   | 806. 5582613 | 796. 474 | 5782615. 094 |

|            |              |          |              |
|------------|--------------|----------|--------------|
| M807T785_2 | 806. 5722067 | 785. 136 | 6048838. 294 |
| M807T836_2 | 806. 5719252 | 836. 034 | 19798969. 95 |
| M807T798   | 806. 5718068 | 797. 773 | 6640715. 597 |
| M807T823   | 806. 5719102 | 822. 881 | 13227755. 22 |
| M807T802_1 | 807. 466331  | 801. 685 | 11711386. 66 |
| M807T652   | 807. 4705923 | 651. 956 | 3780331. 446 |
| M807T802_2 | 807. 4880662 | 801. 685 | 29940020. 5  |
| M809T641   | 808. 5014397 | 640. 717 | 2554938. 708 |
| M809T659   | 809. 1765422 | 658. 953 | 2230501. 992 |
| M809T504_1 | 809. 3781791 | 504. 466 | 1378676. 187 |
| M809T504_2 | 809. 3905913 | 504. 466 | 996178. 5694 |
| M809T741   | 809. 394068  | 741. 302 | 2278706. 185 |
| M809T683   | 809. 488462  | 683. 436 | 2543080. 709 |
| M810T685   | 809. 5090226 | 684. 985 | 3362337. 17  |
| M810T641   | 809. 5348903 | 640. 717 | 658679. 8091 |
| M811T649_1 | 811. 2546943 | 649. 338 | 8111029. 957 |
| M811T98_1  | 811. 2550969 | 97. 7824 | 52843084. 54 |
| M811T107_1 | 811. 2541028 | 106. 513 | 13960794. 52 |
| M811T163   | 811. 2711042 | 162. 728 | 9447730. 775 |
| M811T98_2  | 811. 276993  | 97. 7824 | 61902745. 09 |
| M811T143   | 811. 2714393 | 142. 85  | 13783816. 41 |
| M811T107_2 | 811. 2760262 | 106. 513 | 18343135. 06 |
| M811T649_2 | 811. 2833293 | 649. 338 | 3649439. 212 |
| M812T98_1  | 812. 2635798 | 97. 7824 | 24703093. 94 |
| M812T98_2  | 812. 2846587 | 97. 7824 | 14136266. 54 |
| M812T494_1 | 812. 3674    | 494. 289 | 1237353. 887 |
| M812T494_2 | 812. 385345  | 494. 289 | 893668. 7395 |
| M813T649   | 812. 5380748 | 649. 338 | 2241814. 238 |
| M813T101_1 | 813. 2635469 | 101. 161 | 2187363. 62  |
| M813T101_2 | 813. 2784943 | 101. 161 | 1876838. 492 |
| M814T804_1 | 813. 6759174 | 804. 327 | 1321033. 518 |
| M814T804_2 | 813. 6869224 | 804. 327 | 965179. 9953 |
| M814T338_1 | 814. 28681   | 337. 767 | 8385483. 873 |
| M814T338_2 | 814. 2983384 | 337. 767 | 8502768. 743 |
| M815T338   | 815. 3022799 | 337. 767 | 3315452. 638 |
| M815T597_1 | 815. 4183874 | 596. 628 | 8353103. 993 |
| M815T597_2 | 815. 4294123 | 596. 628 | 25742057. 88 |
| M815T597_3 | 815. 4513665 | 596. 628 | 19032704. 14 |
| M816T430_1 | 815. 9102081 | 430. 131 | 3799464. 508 |
| M816T430_2 | 815. 9321271 | 430. 131 | 2827085. 871 |
| M816T430_3 | 816. 4117522 | 430. 131 | 4008528. 387 |
| M816T430_4 | 816. 4308351 | 430. 131 | 3483462. 066 |
| M816T597_1 | 816. 4346488 | 596. 628 | 13078584. 32 |
| M816T597_2 | 816. 4515957 | 596. 628 | 10798538. 34 |
| M817T430_1 | 816. 9148934 | 430. 131 | 1878957. 875 |
| M817T430_2 | 816. 928109  | 430. 131 | 1717852. 575 |
| M817T597   | 817. 4425619 | 596. 628 | 4121127. 292 |
| M817T659_1 | 817. 4566664 | 658. 953 | 4476981. 794 |
| M817T659_2 | 817. 4808292 | 658. 953 | 3623134. 194 |
| M818T507_1 | 818. 3509722 | 507. 343 | 5201210. 023 |
| M818T507_2 | 818. 367492  | 507. 343 | 2731831. 341 |
| M820T773_1 | 820. 3706531 | 773. 437 | 4498577. 011 |
| M820T773_2 | 820. 3928003 | 773. 437 | 8239693. 7   |
| M820T563_1 | 820. 4597099 | 563. 297 | 35866007. 22 |

|            |              |          |              |
|------------|--------------|----------|--------------|
| M820T563_2 | 820. 4764233 | 563. 297 | 39448087. 22 |
| M821T565   | 820. 966964  | 564. 534 | 44117160. 01 |
| M821T663   | 821. 2067578 | 663. 287 | 12098859. 46 |
| M821T662   | 821. 2266372 | 661. 979 | 9289425. 282 |
| M821T623_1 | 821. 4527794 | 623. 11  | 3473870. 01  |
| M821T563_1 | 821. 4692016 | 563. 297 | 25812711. 1  |
| M821T623_2 | 821. 4745148 | 623. 11  | 2447571. 283 |
| M821T563_2 | 821. 4859577 | 563. 297 | 11972028. 86 |
| M822T565_1 | 821. 9658994 | 564. 534 | 5094348. 635 |
| M822T565_2 | 821. 9821062 | 564. 534 | 4105606. 131 |
| M822T679   | 822. 4848186 | 678. 909 | 508647. 6337 |
| M823T660_1 | 822. 698312  | 660. 455 | 1039780. 559 |
| M823T660_2 | 822. 7096288 | 660. 455 | 939977. 6634 |
| M823T172   | 822. 7253911 | 171. 935 | 3718471. 701 |
| M823T171   | 822. 7552122 | 170. 665 | 4493564. 073 |
| M823T91    | 823. 3145845 | 90. 7088 | 23396958. 41 |
| M823T713_1 | 823. 3875011 | 713. 464 | 8747319. 665 |
| M823T713_2 | 823. 4099079 | 713. 464 | 38202531. 4  |
| M823T713_3 | 823. 4267028 | 713. 464 | 8512511. 663 |
| M823T449   | 823. 449545  | 448. 978 | 2573095. 467 |
| M823T562_1 | 823. 4548358 | 561. 955 | 29922976. 61 |
| M823T651_1 | 823. 4594831 | 650. 898 | 3172763. 13  |
| M823T562_2 | 823. 4715269 | 561. 955 | 133579462. 3 |
| M823T651_2 | 823. 4764016 | 650. 898 | 12090195. 75 |
| M823T562_3 | 823. 4883075 | 561. 955 | 95467474. 23 |
| M823T651_3 | 823. 4875985 | 650. 898 | 8284983. 382 |
| M824T171_1 | 823. 7401138 | 170. 665 | 2807204. 758 |
| M824T171_2 | 823. 7512939 | 170. 665 | 2355606. 285 |
| M824T449   | 824. 4416109 | 448. 978 | 1344304. 938 |
| M824T451   | 824. 4568993 | 450. 503 | 1366595. 101 |
| M824T562_1 | 824. 4641185 | 561. 955 | 20920221. 99 |
| M824T562_2 | 824. 4753381 | 561. 955 | 57694361. 22 |
| M824T562_3 | 824. 4893595 | 561. 955 | 58923408. 36 |
| M825T458_1 | 825. 4527496 | 457. 576 | 4133460. 705 |
| M825T563_1 | 825. 4747623 | 563. 297 | 11200135. 68 |
| M825T458_2 | 825. 4697356 | 457. 576 | 2422601. 783 |
| M825T563_2 | 825. 4915931 | 563. 297 | 11153199. 03 |
| M828T579_1 | 827. 926272  | 578. 816 | 3634046. 521 |
| M828T580   | 827. 9487385 | 580. 22  | 2281818. 838 |
| M828T187_1 | 828. 2746886 | 186. 709 | 8588088. 66  |
| M828T293_1 | 828. 2754393 | 292. 623 | 10505916. 45 |
| M828T258   | 828. 2767752 | 258. 489 | 1318283. 768 |
| M828T275   | 828. 2754816 | 274. 968 | 2588725. 815 |
| M828T240   | 828. 2757501 | 239. 913 | 3224721. 313 |
| M828T209   | 828. 2751877 | 208. 905 | 11051059. 01 |
| M828T109_1 | 828. 2827197 | 108. 698 | 16321831. 02 |
| M828T187_2 | 828. 288891  | 186. 709 | 21546768. 08 |
| M828T293_2 | 828. 2889421 | 292. 623 | 26095305. 95 |
| M828T171_1 | 828. 2887827 | 170. 665 | 14489323. 77 |
| M828T91_1  | 828. 2886909 | 90. 7088 | 58690415. 57 |
| M828T109_2 | 828. 2996706 | 108. 698 | 22913619. 4  |
| M828T187_3 | 828. 3030165 | 186. 709 | 20622629. 56 |
| M828T291   | 828. 3033979 | 291. 307 | 23152549. 63 |
| M828T210   | 828. 3035192 | 210. 186 | 15053620. 85 |

|            |              |          |              |
|------------|--------------|----------|--------------|
| M828T239   | 828. 3083221 | 238. 605 | 7462679. 705 |
| M828T171_2 | 828. 3038697 | 170. 665 | 10505004. 61 |
| M828T91_2  | 828. 3056146 | 90. 7088 | 35411424. 2  |
| M828T579_2 | 828. 4235066 | 578. 816 | 2176038. 258 |
| M828T579_3 | 828. 446115  | 578. 816 | 3079727. 902 |
| M829T579_1 | 828. 926602  | 578. 816 | 1387236. 435 |
| M829T579_2 | 828. 9435787 | 578. 816 | 1769217. 66  |
| M829T97_1  | 829. 256102  | 96. 7698 | 24132054. 09 |
| M829T98    | 829. 2705513 | 97. 7824 | 118833648. 7 |
| M829T293_1 | 829. 288987  | 292. 623 | 7255962. 25  |
| M829T97_2  | 829. 2869264 | 96. 7698 | 101599079. 2 |
| M829T171   | 829. 2949871 | 170. 665 | 4722007. 682 |
| M829T97_3  | 829. 3027166 | 96. 7698 | 13672233. 89 |
| M829T91    | 829. 3037336 | 90. 7088 | 9042999. 664 |
| M829T293_2 | 829. 3059589 | 292. 623 | 5881218. 781 |
| M829T110   | 829. 3031111 | 110. 047 | 2941897. 965 |
| M829T187   | 829. 307782  | 186. 709 | 5847535. 243 |
| M829T605   | 829. 4028934 | 605. 264 | 5667135. 186 |
| M829T604   | 829. 4253351 | 603. 95  | 10723512. 72 |
| M829T591   | 829. 4310135 | 590. 607 | 4396080. 915 |
| M829T597   | 829. 4535876 | 596. 628 | 6055284. 778 |
| M830T293_1 | 830. 2298029 | 292. 623 | 2664321. 942 |
| M830T218_1 | 830. 2356602 | 217. 866 | 8041903. 153 |
| M830T293_2 | 830. 2466908 | 292. 623 | 3913152. 09  |
| M830T218_2 | 830. 2525476 | 217. 866 | 3844510. 898 |
| M830T97    | 830. 2655363 | 96. 7698 | 16389153. 62 |
| M830T293_3 | 830. 2809243 | 292. 623 | 3930975. 964 |
| M830T219_1 | 830. 2753474 | 219. 233 | 2668308. 311 |
| M830T98_1  | 830. 2870437 | 97. 7824 | 34135396. 25 |
| M830T219_2 | 830. 2866922 | 219. 233 | 5126516. 464 |
| M830T293_4 | 830. 2978983 | 292. 623 | 4237436. 203 |
| M830T98_2  | 830. 2986253 | 97. 7824 | 11196291. 17 |
| M830T219_3 | 830. 3033473 | 219. 233 | 2077299. 079 |
| M830T605   | 830. 4176237 | 605. 264 | 6386769. 438 |
| M830T591   | 830. 4171486 | 590. 607 | 2742531. 728 |
| M830T425   | 830. 4169302 | 424. 572 | 4018456. 697 |
| M830T592   | 830. 4284966 | 592. 067 | 2270625. 403 |
| M831T293   | 831. 2380084 | 292. 623 | 2128253. 026 |
| M831T294   | 831. 2574824 | 293. 896 | 2751433. 991 |
| M831T176   | 831. 2633554 | 175. 952 | 2393770. 439 |
| M831T218   | 831. 3026689 | 217. 866 | 659520. 6821 |
| M831T604   | 831. 434295  | 603. 95  | 751480. 4377 |
| M832T177   | 831. 7628272 | 177. 295 | 1422131. 425 |
| M833T537_1 | 832. 8688853 | 536. 761 | 3126548. 522 |
| M833T537_2 | 832. 8916788 | 536. 761 | 7172225. 078 |
| M833T223   | 833. 2321542 | 223. 474 | 2738239. 711 |
| M833T252   | 833. 2336725 | 251. 555 | 1953585. 552 |
| M833T261   | 833. 2340646 | 261. 177 | 2372227. 147 |
| M833T187   | 833. 2395785 | 186. 709 | 13782865. 06 |
| M833T144   | 833. 2388971 | 143. 959 | 3484331. 491 |
| M833T293_1 | 833. 23919   | 292. 623 | 22902127. 34 |
| M833T171   | 833. 2390794 | 170. 665 | 10856473. 9  |
| M833T109_1 | 833. 2394594 | 108. 698 | 10888921. 11 |
| M833T240_1 | 833. 2398156 | 239. 913 | 6359038. 285 |

|            |              |          |              |
|------------|--------------|----------|--------------|
| M833T209_1 | 833. 2392919 | 208. 905 | 12398310. 03 |
| M833T185   | 833. 2562072 | 185. 398 | 27404001. 74 |
| M833T293_2 | 833. 2562751 | 292. 623 | 26664315. 56 |
| M833T169   | 833. 2562232 | 169. 221 | 12910324. 5  |
| M833T209_2 | 833. 2561443 | 208. 905 | 19896314. 98 |
| M833T145   | 833. 2615682 | 145. 382 | 6492746. 923 |
| M833T109_2 | 833. 26223   | 108. 698 | 8049005. 477 |
| M833T240_2 | 833. 2611395 | 239. 913 | 8752800. 113 |
| M834T537_1 | 833. 8775792 | 536. 761 | 2235432. 512 |
| M834T537_2 | 833. 9004681 | 536. 761 | 1701343. 822 |
| M834T184   | 834. 2395823 | 183. 886 | 4377835. 919 |
| M834T293   | 834. 2431928 | 292. 623 | 8313169. 999 |
| M834T109_1 | 834. 2486409 | 108. 698 | 4541403. 618 |
| M834T294   | 834. 2601777 | 293. 896 | 6571501. 022 |
| M834T109_2 | 834. 2600621 | 108. 698 | 3413234. 199 |
| M835T660_1 | 835. 4482604 | 660. 455 | 5619687. 147 |
| M835T653   | 835. 4499906 | 653. 147 | 6559374. 843 |
| M835T713_1 | 835. 4477927 | 713. 464 | 1712222. 108 |
| M835T660_2 | 835. 4617921 | 660. 455 | 34957994. 25 |
| M835T652_1 | 835. 4616117 | 651. 956 | 17440620. 53 |
| M835T705_1 | 835. 4729133 | 704. 715 | 13128266. 22 |
| M835T713_2 | 835. 4731771 | 713. 464 | 36587102. 48 |
| M835T660_3 | 835. 4846889 | 660. 455 | 102144402. 4 |
| M835T652_2 | 835. 4845044 | 651. 956 | 52506109. 66 |
| M835T705_2 | 835. 4853656 | 704. 715 | 13046597. 43 |
| M835T713_3 | 835. 4846294 | 713. 464 | 39289976. 41 |
| M835T660_4 | 835. 4961373 | 660. 455 | 39100326. 97 |
| M835T713_4 | 835. 4960831 | 713. 464 | 15482743. 27 |
| M836T653   | 835. 5037182 | 653. 147 | 8502815. 15  |
| M836T713_1 | 836. 4559427 | 713. 464 | 2235262. 133 |
| M836T705_1 | 836. 4712944 | 704. 715 | 3531626. 238 |
| M836T660_1 | 836. 4703177 | 660. 455 | 32608576. 35 |
| M836T652_1 | 836. 4701968 | 651. 956 | 15524717. 88 |
| M836T713_2 | 836. 4704794 | 713. 464 | 12225092. 17 |
| M836T705_2 | 836. 4942559 | 704. 715 | 4164089. 87  |
| M836T660_2 | 836. 4932529 | 660. 455 | 38947061. 17 |
| M836T652_2 | 836. 4931285 | 651. 956 | 19060511. 61 |
| M836T713_3 | 836. 4932573 | 713. 464 | 15121638. 35 |
| M837T660   | 836. 504716  | 660. 455 | 9017785. 861 |
| M837T652   | 836. 5045354 | 651. 956 | 4435293. 072 |
| M837T669_1 | 837. 4175797 | 668. 867 | 1947049. 535 |
| M837T669_2 | 837. 4348044 | 668. 867 | 2058085. 324 |
| M837T659   | 837. 4646361 | 658. 953 | 4717395. 559 |
| M837T713   | 837. 4722173 | 713. 464 | 4320264. 317 |
| M839T294_1 | 839. 2250404 | 293. 896 | 12389885. 56 |
| M839T205_1 | 839. 2284345 | 204. 747 | 11107431. 6  |
| M839T287_1 | 839. 2284521 | 287. 148 | 9047735. 502 |
| M839T175_1 | 839. 2298066 | 174. 865 | 18292533. 13 |
| M839T109_1 | 839. 2360979 | 108. 698 | 6843965. 687 |
| M839T237_1 | 839. 2306475 | 237. 171 | 11604086. 25 |
| M839T294_2 | 839. 2423298 | 293. 896 | 25716456. 7  |
| M839T161   | 839. 2418669 | 161. 494 | 12769216. 19 |
| M839T205_2 | 839. 2428433 | 204. 747 | 22817273. 72 |
| M839T287_2 | 839. 2425837 | 287. 148 | 18810527. 28 |



|            |              |          |              |
|------------|--------------|----------|--------------|
| M839T260   | 839. 2419868 | 259. 74  | 4450001. 969 |
| M839T152_1 | 839. 2425    | 152. 375 | 13098404. 55 |
| M839T188_1 | 839. 2424461 | 188. 126 | 25183855. 62 |
| M839T175_2 | 839. 2421404 | 174. 865 | 37696551. 94 |
| M839T212_1 | 839. 242408  | 212. 448 | 19652550. 71 |
| M839T237_2 | 839. 2421712 | 237. 171 | 25159117. 08 |
| M839T294_3 | 839. 256737  | 293. 896 | 20841420. 05 |
| M839T205_3 | 839. 2572534 | 204. 747 | 18266131. 1  |
| M839T287_3 | 839. 2560128 | 287. 148 | 14995099. 98 |
| M839T271   | 839. 2583715 | 270. 983 | 5442870. 596 |
| M839T252   | 839. 2591371 | 251. 555 | 1928095. 421 |
| M839T109_2 | 839. 2590517 | 108. 698 | 4427331. 434 |
| M839T152_2 | 839. 2569145 | 152. 375 | 10740368. 89 |
| M839T188_2 | 839. 2568582 | 188. 126 | 20242092. 34 |
| M839T237_3 | 839. 2565766 | 237. 171 | 20990677. 29 |
| M839T175_3 | 839. 255758  | 174. 865 | 29320169. 98 |
| M839T212_2 | 839. 2564245 | 212. 448 | 16112103. 04 |
| M839T261   | 839. 2590815 | 261. 177 | 2365946. 894 |
| M839T692   | 839. 3985764 | 692. 461 | 8405016. 145 |
| M839T462_1 | 839. 466471  | 461. 845 | 7292600. 42  |
| M839T462_2 | 839. 4837294 | 461. 845 | 5441209. 803 |
| M840T205_1 | 839. 7321849 | 204. 747 | 7330633. 535 |
| M840T214_1 | 839. 7316193 | 213. 872 | 6882532. 991 |
| M840T237_1 | 839. 730709  | 237. 171 | 7476927. 321 |
| M840T175_1 | 839. 730243  | 174. 865 | 11692233. 8  |
| M840T294_1 | 839. 7351276 | 293. 896 | 13017919. 01 |
| M840T286   | 839. 7358128 | 285. 9   | 8954227. 418 |
| M840T205_2 | 839. 7437211 | 204. 747 | 15758180. 11 |
| M840T190   | 839. 7436023 | 189. 571 | 17314962. 68 |
| M840T214_2 | 839. 7431593 | 213. 872 | 15017207. 2  |
| M840T237_2 | 839. 7435138 | 237. 171 | 16831209. 63 |
| M840T175_2 | 839. 7434627 | 174. 865 | 24842646. 82 |
| M840T287_1 | 839. 755147  | 287. 148 | 9858890. 556 |
| M840T294_2 | 839. 7566077 | 293. 896 | 13255102. 5  |
| M840T206   | 839. 7598235 | 205. 903 | 15093809. 83 |
| M840T151   | 839. 7590906 | 151. 016 | 4678122. 913 |
| M840T191   | 839. 7595772 | 190. 962 | 10232908. 93 |
| M840T237_3 | 839. 7550441 | 237. 171 | 15055374. 81 |
| M840T175_3 | 839. 7583833 | 174. 865 | 16657803. 22 |
| M840T236_1 | 840. 2341576 | 235. 734 | 4624879. 926 |
| M840T294_3 | 840. 2371888 | 293. 896 | 4903818. 843 |
| M840T205_3 | 840. 2380651 | 204. 747 | 6903078. 687 |
| M840T287_2 | 840. 236452  | 287. 148 | 4087219. 605 |
| M840T175_4 | 840. 2402398 | 174. 865 | 9523884. 484 |
| M840T159_1 | 840. 2471305 | 159. 017 | 8507906. 601 |
| M840T150   | 840. 2453539 | 149. 65  | 3938888. 922 |
| M840T294_4 | 840. 2567304 | 293. 896 | 4686039. 535 |
| M840T287_3 | 840. 2566312 | 287. 148 | 3527024. 77  |
| M840T236_2 | 840. 2521978 | 235. 734 | 8542566. 239 |
| M840T175_5 | 840. 2575421 | 174. 865 | 9178564. 866 |
| M840T159_2 | 840. 2626484 | 159. 017 | 15887954. 09 |
| M840T462   | 840. 4620374 | 461. 845 | 1942203. 611 |
| M841T287_1 | 840. 7482252 | 287. 148 | 2367616. 11  |
| M841T159_1 | 840. 7577172 | 159. 017 | 8554780. 707 |

|            |             |         |             |
|------------|-------------|---------|-------------|
| M841T287_2 | 840.7597849 | 287.148 | 1523222.713 |
| M841T159_2 | 840.7734142 | 159.017 | 6613034.955 |
| M841T203   | 841.2303245 | 203.36  | 1296232.885 |
| M841T159_3 | 841.256096  | 159.017 | 4375245.947 |
| M842T503   | 841.6281463 | 503.046 | 796685.595  |
| M842T502   | 841.6432713 | 501.549 | 498524.2844 |
| M842T159   | 841.7781315 | 159.017 | 616914.967  |
| M845T713_1 | 845.3841777 | 713.464 | 1692456.218 |
| M845T713_2 | 845.3993192 | 713.464 | 1420546.92  |
| M845T554_1 | 845.4382902 | 553.936 | 8459513.539 |
| M845T589_1 | 845.4382316 | 589.053 | 12979139.72 |
| M845T554_2 | 845.4615624 | 553.936 | 7369363.779 |
| M845T589_2 | 845.4557062 | 589.053 | 16320285.63 |
| M846T158_1 | 846.2817723 | 157.773 | 30907088.98 |
| M846T180_1 | 846.2821471 | 179.75  | 16456944.28 |
| M846T102_1 | 846.2951027 | 102.247 | 5961169.566 |
| M846T109_1 | 846.293795  | 108.698 | 13995564.14 |
| M846T263_1 | 846.2904247 | 262.529 | 6468699.252 |
| M846T165_1 | 846.2937785 | 165.217 | 40789103.45 |
| M846T143   | 846.2937959 | 142.85  | 17889843.39 |
| M846T158_2 | 846.2934461 | 157.773 | 100128268.4 |
| M846T230   | 846.3016529 | 230.321 | 10286898.23 |
| M846T180_2 | 846.2938126 | 179.75  | 49703125.47 |
| M846T199_1 | 846.2963007 | 199.43  | 5994616.325 |
| M846T291_1 | 846.2952146 | 291.307 | 5546178.218 |
| M846T263_2 | 846.3020984 | 262.529 | 12371627.83 |
| M846T102_2 | 846.3126189 | 102.247 | 5837091.557 |
| M846T142   | 846.3129092 | 141.825 | 17789056.52 |
| M846T109_2 | 846.3133681 | 108.698 | 13303195.47 |
| M846T158_3 | 846.316795  | 157.773 | 88794169.88 |
| M846T180_3 | 846.3157655 | 179.75  | 40977002.63 |
| M846T165_2 | 846.3141883 | 165.217 | 34989059.94 |
| M846T199_2 | 846.3137901 | 199.43  | 5627995.387 |
| M846T291_2 | 846.3068959 | 291.307 | 6697135.717 |
| M846T554_1 | 846.4476895 | 553.936 | 4910178.264 |
| M846T554_2 | 846.4651678 | 553.936 | 3005134.253 |
| M847T562   | 846.5299021 | 561.955 | 16983946.7  |
| M847T286_1 | 847.2221116 | 285.9   | 4620108.703 |
| M847T295   | 847.2227037 | 295.356 | 4239433.194 |
| M847T237   | 847.2179358 | 237.171 | 3810810.735 |
| M847T176_1 | 847.2201097 | 175.952 | 7070035.567 |
| M847T176_2 | 847.2359137 | 175.952 | 10742705.41 |
| M847T294   | 847.2421446 | 293.896 | 3425169.667 |
| M847T286_2 | 847.242818  | 285.9   | 3320395.276 |
| M847T97_1  | 847.2659764 | 96.7698 | 36537109.43 |
| M847T97_2  | 847.2835    | 96.7698 | 194799088.9 |
| M847T178   | 847.290492  | 178.408 | 6607879.725 |
| M847T158_1 | 847.2981111 | 157.773 | 38166499.22 |
| M847T97_3  | 847.295187  | 96.7698 | 177454834.3 |
| M847T264_1 | 847.3060205 | 264.079 | 3822073.646 |
| M847T158_2 | 847.3127306 | 157.773 | 38744848.19 |
| M847T180   | 847.3137121 | 179.75  | 18469557.09 |
| M847T97_4  | 847.3114207 | 96.7698 | 19871260.12 |
| M847T264_2 | 847.3177288 | 264.079 | 2462035.365 |

|            |              |          |              |
|------------|--------------|----------|--------------|
| M847T110   | 847. 316585  | 110. 047 | 2822164. 831 |
| M848T205_1 | 847. 7221694 | 204. 747 | 3781481. 466 |
| M848T294_1 | 847. 7272108 | 293. 896 | 7453880. 953 |
| M848T237   | 847. 7241741 | 237. 171 | 3505475. 924 |
| M848T175   | 847. 7273473 | 174. 865 | 6604084. 261 |
| M848T205_2 | 847. 7397036 | 204. 747 | 5771733. 368 |
| M848T294_2 | 847. 7445327 | 293. 896 | 4696890. 498 |
| M848T176_1 | 847. 7443614 | 175. 952 | 3550125. 45  |
| M848T158_1 | 848. 2229874 | 157. 773 | 8505906. 906 |
| M848T176_2 | 848. 2255315 | 175. 952 | 4004282. 594 |
| M848T158_2 | 848. 2376603 | 157. 773 | 42465413. 74 |
| M848T158_3 | 848. 2610929 | 157. 773 | 54626540. 98 |
| M848T97_1  | 848. 2723892 | 96. 7698 | 19091328. 99 |
| M848T97_2  | 848. 2841031 | 96. 7698 | 58715222. 99 |
| M848T97_3  | 848. 3016777 | 96. 7698 | 49426499. 67 |
| M848T158_4 | 848. 3060411 | 157. 773 | 12206244. 48 |
| M848T158_5 | 848. 3177523 | 157. 773 | 8887206. 589 |
| M849T562_1 | 848. 547305  | 561. 955 | 11055224. 87 |
| M849T562_2 | 848. 570748  | 561. 955 | 10848843. 57 |
| M849T158_1 | 848. 7357115 | 157. 773 | 21344379. 29 |
| M849T158_2 | 848. 7591583 | 157. 773 | 43001289. 92 |
| M849T165   | 848. 7684856 | 165. 217 | 5582307. 808 |
| M849T210   | 849. 2313634 | 210. 186 | 1068553. 699 |
| M849T158_3 | 849. 2402831 | 157. 773 | 16280865. 71 |
| M849T158_4 | 849. 257884  | 157. 773 | 30116331. 5  |
| M850T159_1 | 849. 7451235 | 159. 017 | 7096098. 284 |
| M850T159_2 | 849. 7630392 | 159. 017 | 8029227. 856 |
| M850T158   | 850. 2433405 | 157. 773 | 2465721. 724 |
| M850T97_1  | 850. 2844835 | 96. 7698 | 2751094. 899 |
| M850T97_2  | 850. 2962332 | 96. 7698 | 4452973. 789 |
| M851T158_1 | 851. 2427068 | 157. 773 | 61245636. 39 |
| M851T293   | 851. 242458  | 292. 623 | 3173924. 444 |
| M851T180_1 | 851. 2427174 | 179. 75  | 27232268. 02 |
| M851T165_1 | 851. 2436306 | 165. 217 | 26945008. 02 |
| M851T261   | 851. 2418057 | 261. 177 | 10971879. 99 |
| M851T230   | 851. 2452017 | 230. 321 | 9537931. 288 |
| M851T142   | 851. 2566533 | 141. 825 | 20795541. 35 |
| M851T158_2 | 851. 2564034 | 157. 773 | 127555949. 5 |
| M851T190_1 | 851. 2563165 | 189. 571 | 20218693. 67 |
| M851T180_2 | 851. 2568607 | 179. 75  | 55500796. 34 |
| M851T165_2 | 851. 2564839 | 165. 217 | 55583435. 75 |
| M851T108   | 851. 255794  | 107. 537 | 31902096. 24 |
| M851T158_3 | 851. 2711262 | 157. 773 | 103881912    |
| M851T190_2 | 851. 2680873 | 189. 571 | 16488088. 78 |
| M851T180_3 | 851. 2686241 | 179. 75  | 43328090. 96 |
| M851T165_3 | 851. 2682498 | 165. 217 | 43927632. 85 |
| M851T109   | 851. 2712882 | 108. 698 | 15747125. 6  |
| M851T574_1 | 851. 4624636 | 574. 363 | 1960242. 478 |
| M851T574_2 | 851. 4853072 | 574. 363 | 2307784. 259 |
| M852T158_1 | 852. 2314644 | 157. 773 | 2675239. 556 |
| M852T158_2 | 852. 2497319 | 157. 773 | 31164719     |
| M852T180_1 | 852. 244213  | 179. 75  | 8034789. 862 |
| M852T165   | 852. 2525934 | 165. 217 | 14253338. 91 |
| M852T230_1 | 852. 25865   | 230. 321 | 5130789. 83  |

|            |              |          |              |
|------------|--------------|----------|--------------|
| M852T261   | 852. 2576961 | 261. 177 | 6719535. 276 |
| M852T266   | 852. 2708616 | 265. 624 | 5873143. 483 |
| M852T158_3 | 852. 2703823 | 157. 773 | 37186157. 99 |
| M852T180_2 | 852. 2709538 | 179. 75  | 16140224. 63 |
| M852T230_2 | 852. 2737174 | 230. 321 | 3998957. 91  |
| M853T158_1 | 853. 2563575 | 157. 773 | 9907618. 71  |
| M853T158_2 | 853. 2745334 | 157. 773 | 9643393. 615 |
| M853T368   | 853. 2915026 | 367. 949 | 3494444. 247 |
| M853T660_1 | 853. 4743971 | 660. 455 | 25871138. 86 |
| M853T706_1 | 853. 4742933 | 706. 229 | 4478005. 84  |
| M853T653_1 | 853. 4741076 | 653. 147 | 16445284. 46 |
| M853T713_1 | 853. 4743416 | 713. 464 | 8742344. 404 |
| M853T660_2 | 853. 4980411 | 660. 455 | 49436927     |
| M853T706_2 | 853. 4979435 | 706. 229 | 8822305. 899 |
| M853T653_2 | 853. 4977508 | 653. 147 | 32220373. 99 |
| M853T713_2 | 853. 4977356 | 713. 464 | 17397252. 84 |
| M854T660_1 | 853. 5098632 | 660. 455 | 14666716. 27 |
| M854T653_1 | 853. 5095909 | 653. 147 | 9748153. 475 |
| M854T159   | 854. 2664714 | 159. 017 | 1627046. 88  |
| M854T660_2 | 854. 480163  | 660. 455 | 16788914. 2  |
| M854T706   | 854. 4787766 | 706. 229 | 2944976. 838 |
| M854T653_2 | 854. 4799089 | 653. 147 | 10359813. 41 |
| M854T713   | 854. 4799395 | 713. 464 | 5274425. 144 |
| M855T660_1 | 854. 5038464 | 660. 455 | 21074575. 86 |
| M855T706   | 854. 5024486 | 706. 229 | 4018961. 512 |
| M855T653_1 | 854. 5035968 | 653. 147 | 13515878. 14 |
| M855T713   | 854. 5036153 | 713. 464 | 6889672. 798 |
| M855T211_1 | 855. 1729624 | 211. 288 | 1912040. 708 |
| M855T294   | 855. 1788461 | 293. 896 | 2251936. 82  |
| M855T211_2 | 855. 190752  | 211. 288 | 2397326. 987 |
| M855T449   | 855. 3693949 | 448. 978 | 1152334. 928 |
| M855T451   | 855. 3876297 | 450. 503 | 1355694. 922 |
| M855T669   | 855. 4227045 | 668. 867 | 2421822. 448 |
| M855T605   | 855. 4460903 | 605. 264 | 1534752. 104 |
| M855T660_2 | 855. 4881554 | 660. 455 | 6951938. 35  |
| M855T653_2 | 855. 4879324 | 653. 147 | 3888564. 179 |
| M856T660   | 855. 5059183 | 660. 455 | 6734910. 669 |
| M856T653   | 855. 5057546 | 653. 147 | 3800865. 727 |
| M856T164   | 856. 2193107 | 163. 846 | 2750801. 904 |
| M856T158_1 | 856. 2241456 | 157. 773 | 14173554. 9  |
| M856T158_2 | 856. 247911  | 157. 773 | 19854677. 11 |
| M856T211_1 | 856. 2649929 | 211. 288 | 1231157. 198 |
| M856T211_2 | 856. 2813562 | 211. 288 | 739759. 5331 |
| M857T159_1 | 856. 7294918 | 159. 017 | 14608059. 77 |
| M857T159_2 | 856. 7532619 | 159. 017 | 9960166. 851 |
| M857T161   | 857. 2256854 | 161. 494 | 5941966. 796 |
| M857T159_3 | 857. 2465043 | 159. 017 | 12348881. 2  |
| M858T703_1 | 857. 5130666 | 703. 35  | 4621745. 525 |
| M858T703_2 | 857. 5307447 | 703. 35  | 3755440. 248 |
| M858T703_3 | 858. 0141226 | 703. 35  | 3854271. 084 |
| M858T703_4 | 858. 0319866 | 703. 35  | 3770132. 811 |
| M859T623   | 859. 4139473 | 623. 11  | 1619891. 717 |
| M861T557_1 | 861. 4391829 | 556. 816 | 3641445. 738 |
| M861T557_2 | 861. 4571734 | 556. 816 | 2513507. 539 |

|            |              |          |              |
|------------|--------------|----------|--------------|
| M863T490   | 862. 9095389 | 489. 826 | 1137324. 675 |
| M863T488   | 862. 9222466 | 488. 437 | 930203. 5606 |
| M863T545_1 | 862. 965439  | 545. 203 | 6558003. 311 |
| M863T545_2 | 862. 9888507 | 545. 203 | 12565831. 36 |
| M863T545_3 | 863. 4690785 | 545. 203 | 5330496. 553 |
| M863T545_4 | 863. 4872155 | 545. 203 | 7981508. 412 |
| M864T545_1 | 863. 97453   | 545. 203 | 3919398. 869 |
| M864T545_2 | 863. 9926046 | 545. 203 | 4111969. 759 |
| M864T209   | 864. 1790993 | 208. 905 | 2306366. 723 |
| M864T97_1  | 864. 3065043 | 96. 7698 | 17059894. 26 |
| M864T97_2  | 864. 3245999 | 96. 7698 | 15652330. 7  |
| M865T97    | 865. 3125898 | 96. 7698 | 3282436. 627 |
| M866T99    | 866. 2497272 | 98. 9918 | 5549627. 938 |
| M866T607   | 866. 4789296 | 606. 774 | 1177326. 773 |
| M867T607   | 866. 5030609 | 606. 774 | 1284936. 835 |
| M867T99_1  | 866. 7567387 | 98. 9918 | 2860033. 861 |
| M867T99_2  | 866. 7688463 | 98. 9918 | 2860239. 298 |
| M867T158_1 | 867. 2199604 | 157. 773 | 13273508. 54 |
| M867T165_1 | 867. 2349993 | 165. 217 | 4645000. 419 |
| M867T158_2 | 867. 2367931 | 157. 773 | 15325452. 18 |
| M867T165_2 | 867. 2471052 | 165. 217 | 2040413. 322 |
| M867T158_3 | 867. 2489402 | 157. 773 | 6650604. 406 |
| M868T649_1 | 867. 7442048 | 649. 338 | 1992009. 556 |
| M868T649_2 | 867. 7621561 | 649. 338 | 2359001. 178 |
| M868T158_1 | 868. 2232261 | 157. 773 | 2849956. 953 |
| M868T158_2 | 868. 2475069 | 157. 773 | 2462113. 583 |
| M869T649   | 868. 7569373 | 649. 338 | 1880318. 838 |
| M870T653   | 870. 4962499 | 653. 147 | 4684621. 868 |
| M870T660   | 870. 4978508 | 660. 455 | 2765532. 647 |
| M871T670_1 | 871. 4038799 | 670. 166 | 1638551. 979 |
| M871T670_2 | 871. 4206619 | 670. 166 | 1008671. 477 |
| M871T583   | 871. 4421211 | 583. 068 | 2697119. 683 |
| M871T600   | 871. 4465681 | 599. 621 | 1211611. 632 |
| M871T582_1 | 871. 4588324 | 581. 625 | 12441088. 29 |
| M871T656   | 871. 4587185 | 655. 9   | 1869347. 795 |
| M871T595   | 871. 4705979 | 595. 066 | 2040462. 123 |
| M871T582_2 | 871. 4710253 | 581. 625 | 11664001. 58 |
| M871T582_3 | 871. 4835501 | 581. 625 | 3620607. 322 |
| M871T660   | 871. 4843807 | 660. 455 | 1875121. 008 |
| M872T838_1 | 871. 5512603 | 837. 524 | 6644215. 881 |
| M872T32_1  | 871. 5494943 | 32. 4171 | 677745. 0434 |
| M872T838_2 | 871. 5634569 | 837. 524 | 13434803. 67 |
| M872T31    | 871. 5705874 | 31. 4047 | 2491122. 688 |
| M872T838_3 | 871. 5817543 | 837. 524 | 8282352. 633 |
| M872T32_2  | 871. 587402  | 32. 4171 | 658669. 2368 |
| M872T582_1 | 872. 4482891 | 581. 625 | 1863519. 329 |
| M872T582_2 | 872. 4727324 | 581. 625 | 6277234. 68  |
| M872T582_3 | 872. 484954  | 581. 625 | 2477375. 585 |
| M873T838_1 | 872. 5584998 | 837. 524 | 6909975. 914 |
| M873T838_2 | 872. 5829392 | 837. 524 | 7377981. 742 |
| M873T158_1 | 873. 1825191 | 157. 773 | 8447054. 547 |
| M873T180_1 | 873. 1821034 | 179. 75  | 4078248. 522 |
| M873T293   | 873. 187526  | 292. 623 | 3000618. 264 |
| M873T286   | 873. 1876033 | 285. 9   | 1935529. 646 |

|            |              |          |              |
|------------|--------------|----------|--------------|
| M873T158_2 | 873. 2069934 | 157. 773 | 8217541. 089 |
| M873T180_2 | 873. 206652  | 179. 75  | 3960123. 289 |
| M873T420   | 873. 4504581 | 420. 274 | 5289350. 443 |
| M873T555_1 | 873. 4574114 | 555. 358 | 6824525. 842 |
| M873T601_1 | 873. 4542    | 601. 04  | 9606830. 552 |
| M873T629_1 | 873. 4611675 | 629. 015 | 4693663. 703 |
| M873T601_2 | 873. 4695509 | 601. 04  | 36742973. 93 |
| M873T583   | 873. 4697818 | 583. 068 | 21359594. 22 |
| M873T555_2 | 873. 4815144 | 555. 358 | 38385811. 76 |
| M873T629_2 | 873. 476009  | 629. 015 | 10521140. 39 |
| M873T601_3 | 873. 4878246 | 601. 04  | 69091215. 83 |
| M873T629_3 | 873. 4882417 | 629. 015 | 9180317. 395 |
| M874T601_1 | 873. 5027892 | 601. 04  | 24751513. 86 |
| M874T178   | 874. 1855585 | 178. 408 | 2883672. 241 |
| M874T158_1 | 874. 1907276 | 157. 773 | 5098057. 131 |
| M874T158_2 | 874. 2058251 | 157. 773 | 4995938. 875 |
| M874T180_1 | 874. 2035308 | 179. 75  | 5472457. 486 |
| M874T158_3 | 874. 3272956 | 157. 773 | 11363424. 35 |
| M874T180_2 | 874. 3266655 | 179. 75  | 4523442. 113 |
| M874T180_3 | 874. 3450477 | 179. 75  | 3796229. 135 |
| M874T158_4 | 874. 345672  | 157. 773 | 10043649. 7  |
| M874T420_1 | 874. 4180275 | 420. 274 | 2555004. 011 |
| M874T420_2 | 874. 4425564 | 420. 274 | 4982741. 912 |
| M874T628   | 874. 4553327 | 627. 58  | 888890. 1264 |
| M874T583   | 874. 4622619 | 583. 068 | 3073349. 894 |
| M874T601_2 | 874. 4740339 | 601. 04  | 18367456. 87 |
| M874T601_3 | 874. 4923739 | 601. 04  | 28259395. 97 |
| M875T653_1 | 875. 4521094 | 653. 147 | 5033780. 687 |
| M875T555_1 | 875. 4681419 | 555. 358 | 2075582. 608 |
| M875T601_1 | 875. 4680753 | 601. 04  | 3288300. 023 |
| M875T653_2 | 875. 4677934 | 653. 147 | 16316540. 74 |
| M875T555_2 | 875. 4803755 | 555. 358 | 5440838. 484 |
| M875T601_2 | 875. 4803508 | 601. 04  | 9048168. 241 |
| M875T653_3 | 875. 4862095 | 653. 147 | 8648431. 289 |
| M875T601_3 | 875. 4926379 | 601. 04  | 8676626. 394 |
| M876T703   | 876. 4770341 | 703. 35  | 7804439. 342 |
| M877T703_1 | 876. 5016426 | 703. 35  | 17248492. 72 |
| M877T703_2 | 876. 9812589 | 703. 35  | 8561380. 423 |
| M877T703_3 | 877. 0058735 | 703. 35  | 14574848. 96 |
| M878T703_1 | 877. 9851447 | 703. 35  | 2971670. 624 |
| M878T703_2 | 878. 0098183 | 703. 35  | 3298925. 005 |
| M882T562_1 | 881. 7173259 | 561. 955 | 25137691. 78 |
| M882T562_2 | 881. 7421531 | 561. 955 | 39426124. 01 |
| M882T538_1 | 881. 8795352 | 538. 316 | 1335079. 315 |
| M882T538_2 | 881. 9034993 | 538. 316 | 2393923. 088 |
| M882T164   | 882. 1715193 | 163. 846 | 2766675. 954 |
| M882T158   | 882. 1795283 | 157. 773 | 13334235. 08 |
| M882T261   | 882. 1823969 | 261. 177 | 4978747. 932 |
| M882T257   | 882. 1950903 | 257. 155 | 2574017. 819 |
| M882T160   | 882. 2012672 | 160. 369 | 15883704. 36 |
| M882T798_1 | 882. 4380484 | 797. 773 | 7262088. 786 |
| M882T798_2 | 882. 4627478 | 797. 773 | 26805248. 27 |
| M882T798_3 | 882. 4782819 | 797. 773 | 4821442. 147 |
| M883T487_1 | 882. 6605683 | 486. 885 | 1101487. 877 |

|            |              |          |              |
|------------|--------------|----------|--------------|
| M883T562_1 | 882. 7296535 | 561. 955 | 28763639. 15 |
| M883T562_2 | 882. 7482858 | 561. 955 | 22740189. 43 |
| M883T487_2 | 882. 9032343 | 486. 885 | 955366. 8557 |
| M883T485   | 882. 9274938 | 485. 471 | 840531. 8306 |
| M883T164_1 | 883. 1836479 | 163. 846 | 4707285. 497 |
| M883T158_1 | 883. 1848288 | 157. 773 | 7655292. 066 |
| M883T164_2 | 883. 2023288 | 163. 846 | 5159702. 421 |
| M883T158_2 | 883. 2034879 | 157. 773 | 8720858. 076 |
| M883T792   | 883. 4328754 | 792. 146 | 33322092. 08 |
| M883T798   | 883. 4703122 | 797. 773 | 11292110. 5  |
| M884T562   | 883. 7599262 | 561. 955 | 1819673. 007 |
| M884T703_1 | 884. 4662051 | 703. 35  | 2926701. 777 |
| M884T798_1 | 884. 4678601 | 797. 773 | 4601438. 431 |
| M884T798_2 | 884. 480396  | 797. 773 | 2289041. 517 |
| M884T703_2 | 884. 4911831 | 703. 35  | 4103176. 467 |
| M885T703_1 | 884. 9665774 | 703. 35  | 3511066. 387 |
| M885T703_2 | 884. 9915295 | 703. 35  | 6202471. 404 |
| M885T582_1 | 885. 4595659 | 581. 625 | 10802184. 85 |
| M885T703_3 | 885. 4575947 | 703. 35  | 1022263. 777 |
| M885T592_1 | 885. 4599644 | 592. 067 | 7760796. 402 |
| M885T565   | 885. 4626937 | 564. 534 | 3090828. 129 |
| M885T582_2 | 885. 484551  | 581. 625 | 37607195. 92 |
| M885T703_4 | 885. 483866  | 703. 35  | 5633998. 926 |
| M885T592_2 | 885. 4845078 | 592. 067 | 26184782. 15 |
| M886T582_1 | 885. 5001114 | 581. 625 | 15821087. 9  |
| M886T703_1 | 885. 502817  | 703. 35  | 1949466. 922 |
| M885T592_3 | 885. 4969936 | 592. 067 | 11179875. 5  |
| M886T703_2 | 885. 7597823 | 703. 35  | 6645968. 39  |
| M886T703_3 | 885. 778469  | 703. 35  | 4081355. 331 |
| M886T573   | 885. 9687891 | 573. 072 | 442192. 4988 |
| M886T703_4 | 885. 9782227 | 703. 35  | 2555843. 383 |
| M886T703_5 | 885. 9934587 | 703. 35  | 1532385. 089 |
| M886T582_2 | 886. 4662655 | 581. 625 | 7492664. 897 |
| M886T592_1 | 886. 4663711 | 592. 067 | 5197264. 738 |
| M886T582_3 | 886. 4787821 | 581. 625 | 17892531. 45 |
| M886T592_2 | 886. 4788807 | 592. 067 | 12133326. 72 |
| M886T582_4 | 886. 4975587 | 581. 625 | 10495606. 49 |
| M886T592_3 | 886. 4976478 | 592. 067 | 6700094. 395 |
| M887T610   | 887. 4301826 | 609. 592 | 1128333. 067 |
| M887T601_1 | 887. 4618856 | 601. 04  | 2330963. 355 |
| M887T582_1 | 887. 4731311 | 581. 625 | 8610033. 932 |
| M887T601_2 | 887. 4744148 | 601. 04  | 30080412. 68 |
| M887T582_2 | 887. 4876232 | 581. 625 | 21654235. 87 |
| M887T601_3 | 887. 48716   | 601. 04  | 93360983. 22 |
| M888T601_1 | 887. 5059488 | 601. 04  | 81037804. 62 |
| M888T583_1 | 887. 5064412 | 583. 068 | 15774396. 78 |
| M888T611_1 | 887. 9372835 | 611. 145 | 1465610. 276 |
| M888T611_2 | 887. 9567836 | 611. 145 | 852394. 198  |
| M888T798_1 | 888. 3970647 | 797. 773 | 9054380. 357 |
| M888T798_2 | 888. 4403197 | 797. 773 | 5528177. 686 |
| M888T601_2 | 888. 4782941 | 601. 04  | 15466079. 92 |
| M888T583_2 | 888. 4792034 | 583. 068 | 3186125. 308 |
| M888T601_3 | 888. 4908407 | 601. 04  | 48064155. 95 |
| M888T583_3 | 888. 4917463 | 583. 068 | 8864067. 661 |

|            |              |          |              |
|------------|--------------|----------|--------------|
| M889T601_1 | 888. 5096643 | 601. 04  | 40649351. 3  |
| M889T583   | 888. 5101615 | 583. 068 | 7295773. 468 |
| M889T798_1 | 889. 4034243 | 797. 773 | 3928662. 927 |
| M889T798_2 | 889. 4277516 | 797. 773 | 9407404. 525 |
| M889T601_2 | 889. 4967053 | 601. 04  | 14789355. 26 |
| M890T601   | 889. 5092751 | 601. 04  | 13941396. 32 |
| M890T158   | 890. 3268131 | 157. 773 | 1883409. 507 |
| M891T601   | 890. 5156155 | 601. 04  | 1705251. 351 |
| M900T620   | 899. 5443632 | 620. 172 | 2980270. 098 |
| M900T632   | 899. 5437464 | 631. 982 | 12185163. 26 |
| M900T562_1 | 899. 7353664 | 561. 955 | 21685194. 55 |
| M900T562_2 | 899. 7545202 | 561. 955 | 18041680. 18 |
| M901T534   | 901. 463261  | 533. 958 | 3924642. 214 |
| M901T551_1 | 901. 4666783 | 550. 919 | 8015310. 593 |
| M901T551_2 | 901. 4859367 | 550. 919 | 7006481. 751 |
| M902T562   | 901. 7482171 | 561. 955 | 4406806. 459 |
| M902T540   | 901. 9605348 | 539. 764 | 1189553. 455 |
| M902T538   | 901. 9751582 | 538. 316 | 421206. 6687 |
| M903T644_1 | 903. 4656005 | 643. 727 | 3091923. 856 |
| M903T566_1 | 903. 4623078 | 565. 79  | 49566496. 57 |
| M903T591_1 | 903. 466036  | 590. 607 | 575715. 6506 |
| M903T644_2 | 903. 4784788 | 643. 727 | 14080066. 34 |
| M903T555   | 903. 4781835 | 555. 358 | 45881566. 04 |
| M903T629   | 903. 4784465 | 629. 015 | 6930322. 853 |
| M903T566_2 | 903. 4912993 | 565. 79  | 298372902. 5 |
| M903T591_2 | 903. 491379  | 590. 607 | 26433534. 92 |
| M904T644_1 | 903. 5042308 | 643. 727 | 11814452. 26 |
| M904T555_1 | 903. 5039193 | 555. 358 | 40922101. 81 |
| M904T629_1 | 903. 5042355 | 629. 015 | 6000092. 649 |
| M904T566_1 | 903. 510604  | 565. 79  | 87265059. 18 |
| M904T566_2 | 903. 5266473 | 565. 79  | 8221348. 063 |
| M904T566_3 | 904. 4642925 | 565. 79  | 10300888. 36 |
| M904T644_2 | 904. 4774807 | 643. 727 | 4167886. 936 |
| M904T566_4 | 904. 4771628 | 565. 79  | 67256758     |
| M904T555_2 | 904. 4770702 | 555. 358 | 13399105. 94 |
| M904T629_2 | 904. 4838338 | 629. 015 | 3301130. 35  |
| M905T566_1 | 904. 5029536 | 565. 79  | 119949999. 8 |
| M905T574_1 | 904. 5201402 | 574. 363 | 14019815     |
| M905T566_2 | 904. 5210564 | 565. 79  | 10194716. 28 |
| M905T574_2 | 904. 5415719 | 574. 363 | 5502739. 933 |
| M905T792_1 | 905. 3807345 | 792. 146 | 4325669. 86  |
| M905T792_2 | 905. 4065614 | 792. 146 | 12506909. 56 |
| M905T566_3 | 905. 4716718 | 565. 79  | 7105345. 673 |
| M905T566_4 | 905. 4842903 | 565. 79  | 30295932. 92 |
| M906T566   | 905. 5101377 | 565. 79  | 26924557. 21 |
| M906T574   | 905. 5386581 | 574. 363 | 5375797. 161 |
| M906T792_1 | 906. 395761  | 792. 146 | 4802353. 828 |
| M906T792_2 | 906. 4151536 | 792. 146 | 3909619. 978 |
| M907T713   | 907. 4242219 | 713. 464 | 1623133. 391 |
| M908T715   | 908. 4105448 | 715. 011 | 1510385. 166 |
| M908T512_1 | 908. 437739  | 511. 77  | 631052. 9675 |
| M908T512_2 | 908. 4560945 | 511. 77  | 648255. 8556 |
| M911T576   | 910. 5015904 | 575. 878 | 2922016. 051 |
| M911T488_1 | 910. 5047099 | 488. 437 | 1905436. 301 |



|            |              |          |              |
|------------|--------------|----------|--------------|
| M911T488_2 | 910. 524253  | 488. 437 | 1209255. 694 |
| M911T236   | 911. 2805282 | 235. 734 | 1330768. 885 |
| M912T649_1 | 911. 5091188 | 649. 338 | 6909093. 868 |
| M912T649_2 | 911. 5221625 | 649. 338 | 24427343. 91 |
| M912T649_3 | 911. 5417343 | 649. 338 | 24126025. 12 |
| M912T291   | 911. 75658   | 291. 307 | 1967749. 048 |
| M912T540   | 912. 4502345 | 539. 764 | 909229. 6816 |
| M913T649_1 | 912. 5214253 | 649. 338 | 8730214. 37  |
| M913T649_2 | 912. 5410148 | 649. 338 | 14037671. 98 |
| M913T649_3 | 912. 5545895 | 649. 338 | 4525799. 516 |
| M913T540_1 | 913. 083713  | 539. 764 | 1619058. 291 |
| M913T540_2 | 913. 0966924 | 539. 764 | 3183658. 95  |
| M913T183   | 913. 2726773 | 182. 574 | 1238966. 507 |
| M913T605   | 913. 2848989 | 605. 264 | 1208713. 247 |
| M913T314   | 913. 3249529 | 314. 259 | 1709190. 09  |
| M913T603   | 913. 4824096 | 602. 513 | 2233288. 961 |
| M920T294_1 | 920. 2407084 | 293. 896 | 4996367. 632 |
| M920T181_1 | 920. 239841  | 181. 154 | 7931144. 088 |
| M920T284_1 | 920. 2405783 | 284. 377 | 6166922. 034 |
| M920T205_1 | 920. 2578917 | 204. 747 | 7042715. 282 |
| M920T294_2 | 920. 2572372 | 293. 896 | 9802355. 933 |
| M920T181_2 | 920. 2567787 | 181. 154 | 15567943. 52 |
| M920T284_2 | 920. 2571132 | 284. 377 | 11985532. 67 |
| M920T294_3 | 920. 2704495 | 293. 896 | 17085308. 71 |
| M920T108   | 920. 2685286 | 107. 537 | 2509838. 549 |
| M920T181_3 | 920. 2700167 | 181. 154 | 26765502. 61 |
| M920T284_3 | 920. 2703348 | 284. 377 | 20983706. 36 |
| M920T205_2 | 920. 2864305 | 204. 747 | 6922839. 526 |
| M920T294_4 | 920. 2836641 | 293. 896 | 11507474. 97 |
| M920T181_4 | 920. 2832526 | 181. 154 | 18552162. 17 |
| M920T284_4 | 920. 2835585 | 284. 377 | 14270490. 81 |
| M921T284_1 | 920. 7521795 | 284. 377 | 4024893. 204 |
| M921T206_1 | 920. 7659113 | 205. 903 | 9713984. 532 |
| M921T181_1 | 920. 7651841 | 181. 154 | 19216965. 42 |
| M921T221_1 | 920. 765492  | 220. 676 | 9392261. 028 |
| M921T240   | 920. 7657135 | 239. 913 | 5747311. 598 |
| M921T284_2 | 920. 7654068 | 284. 377 | 12247004. 74 |
| M921T294   | 920. 7791536 | 293. 896 | 8507823. 775 |
| M921T181_2 | 920. 7849632 | 181. 154 | 14373644. 82 |
| M921T206_2 | 920. 7897498 | 205. 903 | 4974840. 498 |
| M921T221_2 | 920. 7906112 | 220. 676 | 4661737. 738 |
| M921T284_3 | 920. 7852415 | 284. 377 | 8580817. 428 |
| M921T286_1 | 921. 2546269 | 285. 9   | 2766833. 446 |
| M921T295_1 | 921. 2556725 | 295. 356 | 2574129. 112 |
| M921T286_2 | 921. 2683622 | 285. 9   | 6579245. 093 |
| M921T181_3 | 921. 2674298 | 181. 154 | 10506034. 89 |
| M921T295_2 | 921. 2689305 | 295. 356 | 6122998. 213 |
| M921T222_1 | 921. 269049  | 222. 017 | 4370446. 882 |
| M921T295_3 | 921. 2821878 | 295. 356 | 5236243. 522 |
| M921T180   | 921. 2898852 | 179. 75  | 5650860. 946 |
| M921T286_3 | 921. 2919916 | 285. 9   | 2113100. 639 |
| M921T222_2 | 921. 2889414 | 222. 017 | 2213061. 282 |
| M922T180   | 922. 2842231 | 179. 75  | 1617973. 206 |
| M922T294   | 922. 3373314 | 293. 896 | 2540328. 674 |

|            |              |          |              |
|------------|--------------|----------|--------------|
| M922T295   | 922. 3566424 | 295. 356 | 1830451. 635 |
| M923T518   | 923. 4117259 | 517. 762 | 1793382. 265 |
| M925T574_1 | 925. 4269871 | 574. 363 | 4730624. 506 |
| M925T574_2 | 925. 4536952 | 574. 363 | 8718411. 338 |
| M925T644   | 925. 466481  | 643. 727 | 670543. 386  |
| M926T652   | 926. 4968874 | 651. 956 | 4097974. 088 |
| M927T652   | 926. 523462  | 651. 956 | 5599182. 105 |
| M927T601   | 927. 4695816 | 601. 04  | 1919267. 643 |
| M927T669   | 927. 4860993 | 668. 867 | 1147634. 374 |
| M927T603   | 927. 4957236 | 602. 513 | 4968192. 011 |
| M928T181_1 | 928. 2449335 | 181. 154 | 5960685. 258 |
| M928T294_1 | 928. 2505996 | 293. 896 | 4783676. 592 |
| M928T284_1 | 928. 2507684 | 284. 377 | 4540054. 944 |
| M928T294_2 | 928. 2639988 | 293. 896 | 4402042. 962 |
| M928T181_2 | 928. 2650716 | 181. 154 | 8570897. 276 |
| M928T284_2 | 928. 2641407 | 284. 377 | 4514570. 388 |
| M928T284_3 | 928. 2776525 | 284. 377 | 1367474. 771 |
| M928T109_1 | 928. 3369416 | 108. 698 | 2157749. 348 |
| M928T109_2 | 928. 3570836 | 108. 698 | 1754770. 332 |
| M929T183_1 | 928. 7472062 | 182. 574 | 3415289. 107 |
| M929T284_1 | 928. 7468155 | 284. 377 | 2712729. 104 |
| M929T183_2 | 928. 7673679 | 182. 574 | 4129564. 964 |
| M929T284_2 | 928. 766732  | 284. 377 | 3139720. 163 |
| M929T295   | 928. 7776099 | 295. 356 | 661528. 2671 |
| M929T181_1 | 929. 2598756 | 181. 154 | 7734338. 809 |
| M929T144_1 | 929. 2631923 | 143. 959 | 4918868. 141 |
| M929T159   | 929. 2642107 | 159. 017 | 4617203. 062 |
| M929T181_2 | 929. 2732478 | 181. 154 | 15587154. 11 |
| M929T144_2 | 929. 290054  | 143. 959 | 3908015. 38  |
| M929T160   | 929. 2842611 | 160. 369 | 5955756. 112 |
| M929T180   | 929. 2923163 | 179. 75  | 7892481. 833 |
| M929T191   | 929. 2919068 | 190. 962 | 1354538. 157 |
| M930T649_1 | 929. 5128402 | 649. 338 | 12538318. 23 |
| M930T559   | 929. 5210935 | 559. 459 | 2532823. 09  |
| M930T649_2 | 929. 5262635 | 649. 338 | 69499126. 7  |
| M930T703_1 | 929. 5261025 | 703. 35  | 14626070. 98 |
| M930T649_3 | 929. 5531238 | 649. 338 | 105521103. 2 |
| M930T703_2 | 929. 5529656 | 703. 35  | 22825298. 83 |
| M930T144   | 929. 7680014 | 143. 959 | 3978485. 844 |
| M930T181_1 | 929. 7679161 | 181. 154 | 9130440. 651 |
| M930T703_3 | 930. 0429124 | 703. 35  | 2718366. 638 |
| M930T181_2 | 930. 2686287 | 181. 154 | 3884351. 881 |
| M931T649_1 | 930. 5162018 | 649. 338 | 5142249. 763 |
| M931T649_2 | 930. 5281577 | 649. 338 | 32159000. 23 |
| M931T649_3 | 930. 5416179 | 649. 338 | 70685333. 28 |
| M931T649_4 | 930. 5618081 | 649. 338 | 36453582. 99 |
| M932T649_1 | 931. 5252888 | 649. 338 | 5066168. 349 |
| M932T649_2 | 931. 5387594 | 649. 338 | 17568400. 35 |
| M932T649_3 | 931. 5589721 | 649. 338 | 17191639. 49 |
| M932T649_4 | 931. 5722331 | 649. 338 | 4388987. 849 |
| M937T541_1 | 936. 7737253 | 541. 275 | 2225160. 718 |
| M937T541_2 | 936. 793413  | 541. 275 | 1262790. 56  |
| M937T181_1 | 937. 2484015 | 181. 154 | 2076875. 83  |
| M937T181_2 | 937. 2746817 | 181. 154 | 3326178. 03  |

|            |             |         |             |
|------------|-------------|---------|-------------|
| M938T143_1 | 938.2657511 | 142.85  | 3727832.93  |
| M938T143_2 | 938.2904044 | 142.85  | 5627314.958 |
| M939T649_1 | 938.5348678 | 649.338 | 6481050.039 |
| M939T143   | 938.7998171 | 142.85  | 1794279.536 |
| M939T649_2 | 939.0249694 | 649.338 | 1743301.796 |
| M939T649_3 | 939.0387738 | 649.338 | 8353449.209 |
| M939T665   | 939.4756739 | 664.745 | 2241187.549 |
| M940T736_1 | 939.511098  | 735.7   | 2741822.883 |
| M940T648   | 939.5378716 | 648.026 | 4739368.122 |
| M940T736_2 | 939.5383415 | 735.7   | 2786149.451 |
| M940T649   | 939.5651054 | 649.338 | 4342683.213 |
| M941T665   | 940.5066768 | 664.745 | 1379599.964 |
| M941T736   | 940.5136491 | 735.7   | 1576730.781 |
| M941T734   | 940.5410061 | 734.269 | 1431076.721 |
| M942T248_1 | 942.3561718 | 247.692 | 1683377.025 |
| M942T248_2 | 942.3733195 | 247.692 | 767965.2243 |
| M943T567_1 | 943.4753686 | 567.1   | 3353473.432 |
| M943T567_2 | 943.4958656 | 567.1   | 2437079.565 |
| M944T611   | 944.4463959 | 611.145 | 1722819.721 |
| M947T648   | 946.561472  | 648.026 | 1436832.475 |
| M948T649_1 | 947.5200665 | 649.338 | 4405370.345 |
| M948T648   | 947.5429278 | 648.026 | 63074513.33 |
| M948T649_2 | 947.5705424 | 649.338 | 35700804.08 |
| M949T649_1 | 948.530749  | 649.338 | 6677383.841 |
| M949T649_2 | 948.5531334 | 649.338 | 40800122.84 |
| M949T649_3 | 948.5738808 | 649.338 | 18181293.2  |
| M949T719   | 948.5747237 | 719.215 | 13024326.76 |
| M949T540_1 | 948.9478346 | 539.764 | 2318950.354 |
| M949T540_2 | 948.9685838 | 539.764 | 1855541.281 |
| M950T719_1 | 949.5373098 | 719.215 | 3575931.162 |
| M950T649   | 949.5447425 | 649.338 | 7186584.273 |
| M950T648   | 949.5723919 | 648.026 | 8186308.691 |
| M950T719_2 | 949.5794098 | 719.215 | 2352160.524 |
| M951T719_1 | 950.5507121 | 719.215 | 2409492.426 |
| M951T719_2 | 950.571551  | 719.215 | 2407416.231 |
| M952T705   | 951.5539839 | 704.715 | 233725.876  |
| M952T545   | 952.4883426 | 545.203 | 6116380.668 |
| M953T547   | 952.5311215 | 546.651 | 5868566.99  |
| M953T545_1 | 952.9889808 | 545.203 | 6815940.179 |
| M953T545_2 | 953.4964995 | 545.203 | 8680212.956 |
| M954T698   | 953.5327213 | 697.952 | 2652151.404 |
| M954T545   | 954.0209148 | 545.203 | 7186515.149 |
| M955T697_1 | 954.539925  | 696.575 | 1661282.272 |
| M955T697_2 | 954.5608454 | 696.575 | 900587.3851 |
| M955T545   | 955.4968733 | 545.203 | 10227565.61 |
| M956T545_1 | 955.5248934 | 545.203 | 30708739.13 |
| M956T545_2 | 955.5389092 | 545.203 | 11352538.25 |
| M957T545_1 | 956.5071151 | 545.203 | 7929911.161 |
| M957T545_2 | 956.5351463 | 545.203 | 10123269.35 |
| M957T617   | 956.5448728 | 617.133 | 232358.4287 |
| M959T651   | 958.5145773 | 650.898 | 2325282.448 |
| M959T535_1 | 959.4581161 | 535.329 | 1414522.434 |
| M959T535_2 | 959.4783388 | 535.329 | 1012000.223 |
| M961T595_1 | 961.4779357 | 595.066 | 5758954.699 |

|            |              |          |              |
|------------|--------------|----------|--------------|
| M961T595_2 | 961. 4920568 | 595. 066 | 12522807. 82 |
| M962T595   | 961. 5132393 | 595. 066 | 6233063. 912 |
| M963T595   | 963. 4946855 | 595. 066 | 1823166. 824 |
| M967T703_1 | 966. 5299731 | 703. 35  | 16374618. 23 |
| M967T703_2 | 966. 5449882 | 703. 35  | 6169700. 608 |
| M967T703_3 | 967. 0077007 | 703. 35  | 6197484. 412 |
| M967T703_4 | 967. 0360256 | 703. 35  | 14871539. 62 |
| M968T703_1 | 967. 5132203 | 703. 35  | 7178330. 275 |
| M968T703_2 | 967. 5417597 | 703. 35  | 8029083. 349 |
| M968T703_3 | 968. 0414438 | 703. 35  | 3063472. 195 |
| M970T703_1 | 969. 507777  | 703. 35  | 9901735. 864 |
| M970T703_2 | 969. 5292352 | 703. 35  | 52259745. 08 |
| M970T703_3 | 969. 5506945 | 703. 35  | 30155637. 71 |
| M970T702_1 | 970. 0168964 | 702. 055 | 5828970. 092 |
| M970T702_2 | 970. 0454869 | 702. 055 | 12608532. 99 |
| M970T702_3 | 970. 0580845 | 702. 055 | 3881199. 654 |
| M973T99_1  | 973. 2987631 | 98. 9918 | 13775037. 32 |
| M973T99_2  | 973. 3131053 | 98. 9918 | 35536680. 12 |
| M973T107_1 | 973. 3112592 | 106. 513 | 15099206. 32 |
| M973T99_3  | 973. 327492  | 98. 9918 | 33804706. 08 |
| M973T107_2 | 973. 3256303 | 106. 513 | 14366366. 27 |
| M973T99_4  | 973. 3406667 | 98. 9918 | 11356966. 59 |
| M974T100_1 | 974. 3032374 | 100. 146 | 4650265. 811 |
| M974T649_1 | 974. 3132731 | 649. 338 | 2245135. 315 |
| M974T100_2 | 974. 3207448 | 100. 146 | 11267173. 52 |
| M974T649_2 | 974. 3349266 | 649. 338 | 1941905. 187 |
| M975T603   | 975. 4967677 | 602. 513 | 3973745. 982 |
| M977T554   | 977. 4729973 | 553. 936 | 2859010. 911 |
| M977T592   | 977. 4725353 | 592. 067 | 3395426. 714 |
| M978T554   | 977. 5019646 | 553. 936 | 4572303. 218 |
| M978T592   | 977. 5014932 | 592. 067 | 5161103. 529 |
| M979T545_1 | 978. 5818414 | 545. 203 | 3603036. 302 |
| M979T545_2 | 978. 6034289 | 545. 203 | 3831525. 988 |
| M984T588   | 983. 5275372 | 587. 521 | 806274. 6529 |
| M985T574   | 984. 9632755 | 574. 363 | 586234. 8497 |
| M988T683   | 987. 5262509 | 683. 436 | 745937. 6308 |
| M990T290   | 990. 3283215 | 289. 912 | 5524035. 283 |
| M990T107_1 | 990. 3353376 | 106. 513 | 4274756. 234 |
| M990T291   | 990. 357831  | 291. 307 | 6338682. 966 |
| M990T107_2 | 990. 3570707 | 106. 513 | 3707056. 412 |
| M991T99_1  | 991. 305478  | 98. 9918 | 14007175. 03 |
| M991T99_2  | 991. 3199469 | 98. 9918 | 45627306. 75 |
| M991T99_3  | 991. 3421184 | 98. 9918 | 40593963. 92 |
| M991T143   | 991. 3504235 | 142. 85  | 4351824. 811 |
| M991T172   | 991. 3550479 | 171. 935 | 1096349. 513 |
| M992T293_1 | 992. 2892581 | 292. 623 | 2125505. 349 |
| M992T293_2 | 992. 3033657 | 292. 623 | 1564581. 125 |
| M992T99_1  | 992. 3286171 | 98. 9918 | 19685326. 22 |
| M992T99_2  | 992. 3489075 | 98. 9918 | 11904049. 71 |
| M994T187   | 994. 3191893 | 186. 709 | 628793. 0498 |
| M995T293   | 995. 2833279 | 292. 623 | 3980239. 397 |
| M995T297   | 995. 3115387 | 296. 739 | 3334153. 523 |
| M995T171   | 995. 3125225 | 170. 665 | 2456420. 073 |
| M995T286   | 995. 3135075 | 285. 9   | 2306180. 15  |

|            |             |         |             |
|------------|-------------|---------|-------------|
| M995T295   | 995.3245859 | 295.356 | 682849.5005 |
| M995T194   | 995.3271694 | 193.823 | 3384691.305 |
| M995T240   | 995.3266661 | 239.913 | 1411979.979 |
| M999T659_1 | 998.5290625 | 658.953 | 1551730.274 |
| M999T659_2 | 998.5520379 | 658.953 | 841124.4261 |

Table S7 LC-MS Analysis of Metabolome\_neg

| ID        | mz | rt          | 引火汤      |             |
|-----------|----|-------------|----------|-------------|
| M91T50    |    | 91.02713537 | 50.0766  | 109146.7714 |
| M91T67    |    | 91.02718547 | 67.1831  | 563561.421  |
| M91T33    |    | 91.02052938 | 32.8715  | 636790.7365 |
| M91T87    |    | 91.02701771 | 87.426   | 3967370.953 |
| M93T787   |    | 92.9262913  | 787.078  | 1104124.226 |
| M93T694   |    | 92.92646105 | 694.341  | 915318.4044 |
| M93T447   |    | 93.01995626 | 446.967  | 313827.821  |
| M93T54    |    | 93.03302557 | 53.948   | 168106.8897 |
| M93T61    |    | 93.03304124 | 61.4369  | 233324.2698 |
| M93T67    |    | 93.03306622 | 67.1831  | 368636.419  |
| M93T44    |    | 93.03304121 | 44.4091  | 850386.9009 |
| M93T84    |    | 93.03299112 | 83.9405  | 22425511.4  |
| M93T381   |    | 93.03297636 | 380.608  | 3135557.454 |
| M94T563_1 |    | 93.91463346 | 562.946  | 1607794.768 |
| M94T563_2 |    | 93.9740546  | 562.946  | 2084469.93  |
| M94T367   |    | 94.02774663 | 367.026  | 8342194.198 |
| M94T405   |    | 94.02779349 | 405.254  | 9202681.903 |
| M94T385   |    | 94.02777669 | 385.225  | 17376996.36 |
| M94T312   |    | 94.02765612 | 312.058  | 8825771.533 |
| M94T329   |    | 94.02848575 | 328.999  | 24515619.28 |
| M94T106   |    | 94.02816364 | 105.537  | 21105386.94 |
| M94T179   |    | 94.02850042 | 179.046  | 28967398.48 |
| M95T693   |    | 94.92341849 | 692.781  | 519794.9426 |
| M95T94    |    | 95.01224232 | 94.1615  | 101308190.6 |
| M95T51    |    | 95.02345847 | 51.3903  | 284623.8425 |
| M95T69    |    | 95.02348868 | 69.1983  | 1034625.671 |
| M95T176   |    | 95.02349378 | 176.104  | 2762600.793 |
| M95T33    |    | 95.02345641 | 32.8715  | 1802408.246 |
| M95T329   |    | 95.0316771  | 328.999  | 1021988.112 |
| M96T53    |    | 96.00753043 | 53.1946  | 185007.8129 |
| M96T48    |    | 96.00751225 | 47.71805 | 104442.6541 |
| M96T59    |    | 96.00753715 | 59.2937  | 462945.3213 |
| M96T67    |    | 96.00754507 | 67.1831  | 822451.5835 |
| M96T33    |    | 96.00754448 | 32.8715  | 1219737.894 |
| M96T137   |    | 96.00749741 | 137.226  | 2964622.444 |
| M97T50    |    | 96.92740907 | 50.2079  | 61519.605   |
| M97T65_1  |    | 96.9275874  | 65.4825  | 253308.4742 |
| M97T78_1  |    | 96.92728339 | 78.2661  | 38112446.97 |
| M97T33_1  |    | 96.92746907 | 32.8715  | 504240.9193 |
| M97T455   |    | 96.95803792 | 454.645  | 41785086.52 |
| M97T749   |    | 96.95897664 | 748.742  | 41615705.22 |
| M97T435   |    | 96.95914152 | 434.617  | 48107654.31 |
| M97T787   |    | 96.95897637 | 787.078  | 12568775.04 |
| M97T539   |    | 96.95803507 | 538.619  | 80178349.99 |
| M97T600   |    | 96.958035   | 599.904  | 55058110.15 |
| M97T78_2  |    | 96.95837005 | 78.2661  | 4855479268  |
| M97T327   |    | 96.95915854 | 327.449  | 37477238.33 |
| M97T795   |    | 96.9589532  | 794.753  | 11170688.84 |
| M97T415   |    | 96.95912104 | 414.571  | 48177935.14 |
| M97T730   |    | 96.95896735 | 730.264  | 93678459.59 |
| M97T253   |    | 96.95916339 | 252.703  | 197068737.7 |
| M97T578   |    | 96.95803965 | 578.353  | 169126387.3 |

|          |              |          |              |
|----------|--------------|----------|--------------|
| M97T660  | 96. 95804294 | 659. 904 | 120767003. 4 |
| M97T65_2 | 96. 95835958 | 65. 4825 | 48025899. 9  |
| M97T609  | 96. 95804418 | 609. 19  | 55414984. 73 |
| M97T473  | 96. 95912222 | 473. 329 | 45078689. 36 |
| M97T283  | 96. 95916118 | 282. 659 | 58541626     |
| M97T500  | 96. 95804573 | 499. 759 | 184281979    |
| M97T688  | 96. 95898833 | 688. 189 | 58953174. 92 |
| M97T805  | 96. 95807806 | 805. 145 | 9658077. 594 |
| M97T33_2 | 96. 95837766 | 32. 8715 | 65088967. 06 |
| M97T816  | 96. 95804918 | 815. 664 | 5278410. 623 |
| M97T365  | 96. 95916122 | 365. 475 | 58324679. 4  |
| M97T466  | 96. 95803335 | 465. 575 | 58472161. 17 |
| M97T637  | 96. 95803851 | 636. 925 | 171596573. 4 |
| M97T376  | 96. 95914126 | 376. 15  | 45133281. 68 |
| M97T305  | 96. 95911783 | 304. 743 | 79927680. 97 |
| M97T697  | 96. 95896507 | 697. 061 | 53387733. 93 |
| M97T347  | 96. 95911833 | 347. 166 | 63818598. 4  |
| M97T778  | 96. 95804292 | 777. 92  | 15169255. 66 |
| M97T425  | 96. 95914058 | 425. 439 | 55163733. 17 |
| M97T446  | 96. 95913748 | 445. 522 | 62830535. 65 |
| M97T712  | 96. 9589856  | 711. 794 | 71368396. 36 |
| M97T764  | 96. 95897439 | 764. 034 | 24427221. 45 |
| M97T394  | 96. 95913257 | 394. 467 | 55146142. 04 |
| M97T405  | 96. 95909504 | 405. 254 | 47012982. 28 |
| M97T385  | 96. 9591588  | 385. 225 | 46820719. 23 |
| M97T677  | 96. 95805178 | 676. 878 | 71880517. 37 |
| M97T526  | 96. 95803914 | 526. 124 | 43624115. 33 |
| M97T825  | 96. 95806586 | 824. 864 | 4769614. 891 |
| M97T835  | 96. 95809874 | 835. 329 | 3516823. 123 |
| M97T136  | 96. 96804037 | 135. 795 | 40036017. 48 |
| M97T115  | 96. 96805297 | 115. 123 | 65114365. 4  |
| M97T52   | 96. 98971155 | 52. 1437 | 118737. 1086 |
| M97T59   | 96. 98960831 | 58. 7682 | 134929. 6758 |
| M97T65_3 | 96. 98999554 | 65. 0166 | 240850. 4948 |
| M97T44   | 96. 98938718 | 43. 6868 | 159253. 0694 |
| M97T33_3 | 96. 9894064  | 32. 8715 | 507854. 3095 |
| M97T77   | 96. 98939133 | 77. 2263 | 39954277. 51 |
| M97T95   | 97. 02797644 | 95. 2383 | 181383879. 3 |
| M97T317  | 97. 06421882 | 316. 709 | 133658. 1795 |
| M98T433  | 97. 91102503 | 433. 06  | 841396. 3476 |
| M98T53   | 97. 9578998  | 53. 1598 | 61843. 13027 |
| M98T64   | 97. 95789473 | 64. 1815 | 79961. 40858 |
| M98T44   | 97. 95790989 | 43. 6868 | 83780. 66599 |
| M98T78   | 97. 95778988 | 78. 2661 | 32406636. 84 |
| M98T33   | 97. 95785704 | 32. 8715 | 481501. 3661 |
| M98T95   | 98. 03119168 | 95. 2383 | 5636906. 01  |
| M99T49   | 98. 95433189 | 48. 7378 | 418217. 2762 |
| M99T57   | 98. 95430722 | 56. 668  | 558099. 1295 |
| M99T65   | 98. 95436234 | 65. 0166 | 1564513. 715 |
| M99T78   | 98. 95423266 | 78. 2661 | 202622358. 8 |
| M99T33   | 98. 95434451 | 32. 8715 | 2580294. 854 |
| M99T46   | 98. 96506849 | 46. 4105 | 119940. 0793 |
| M99T62   | 98. 96507648 | 62. 1587 | 291716. 7426 |
| M99T274  | 99. 00699504 | 274. 208 | 2917890. 914 |

|         |              |          |              |
|---------|--------------|----------|--------------|
| M99T281 | 99. 00700518 | 281. 097 | 3714800. 563 |
| M99T286 | 99. 00701631 | 286. 433 | 5360520. 672 |
| M99T79  | 99. 00717939 | 79. 4105 | 18211598. 13 |
| M99T455 | 99. 00698533 | 454. 645 | 7759340. 957 |
| M99T433 | 99. 00704688 | 433. 06  | 7546245. 512 |
| M99T537 | 99. 00700972 | 537. 051 | 5961587. 713 |
| M99T227 | 99. 00698379 | 227. 421 | 11589193. 33 |
| M99T643 | 99. 0069638  | 643. 166 | 6738497. 283 |
| M99T600 | 99. 00700102 | 599. 904 | 6217836. 802 |
| M99T266 | 99. 00701438 | 265. 541 | 9209290. 461 |
| M99T622 | 99. 00692384 | 621. 547 | 11383812. 73 |
| M99T415 | 99. 00705113 | 414. 571 | 6979554. 11  |
| M99T520 | 99. 00692562 | 519. 998 | 7791917. 685 |
| M99T398 | 99. 00700462 | 397. 585 | 7134996. 992 |
| M99T805 | 99. 00702937 | 805. 145 | 6568102. 69  |
| M99T721 | 99. 00695627 | 721. 058 | 6459095. 623 |
| M99T609 | 99. 00699548 | 609. 19  | 9945516. 081 |
| M99T635 | 99. 00694601 | 635. 37  | 9256168. 197 |
| M99T107 | 99. 00724668 | 106. 648 | 31453588. 84 |
| M99T761 | 99. 00694111 | 760. 976 | 13064277. 45 |
| M99T326 | 99. 00705203 | 325. 901 | 13762401. 6  |
| M99T688 | 99. 0069888  | 688. 189 | 8409453. 513 |
| M99T572 | 99. 00705515 | 572. 152 | 12596760. 91 |
| M99T589 | 99. 00698704 | 589. 157 | 10547571. 76 |
| M99T746 | 99. 00688238 | 745. 747 | 7975939. 352 |
| M99T388 | 99. 00698526 | 388. 326 | 7031113. 938 |
| M99T246 | 99. 00701364 | 246. 013 | 6622791. 365 |
| M99T425 | 99. 0070286  | 425. 439 | 6759171. 352 |
| M99T509 | 99. 00703765 | 509. 11  | 5907223. 44  |
| M99T305 | 99. 00691103 | 304. 743 | 7964621. 79  |
| M99T675 | 99. 00696935 | 675. 322 | 10774121. 63 |
| M99T798 | 99. 00694731 | 797. 757 | 5648366. 183 |
| M99T376 | 99. 00698917 | 376. 15  | 10412483. 51 |
| M99T466 | 99. 00705367 | 465. 575 | 6877247. 539 |
| M99T347 | 99. 00698487 | 347. 166 | 7451972. 825 |
| M99T529 | 99. 00705579 | 529. 248 | 6951845. 935 |
| M99T658 | 99. 00699432 | 658. 372 | 8430956. 513 |
| M99T257 | 99. 00699223 | 257. 001 | 5706995. 826 |
| M99T446 | 99. 00704466 | 445. 522 | 7600506. 176 |
| M99T549 | 99. 00700251 | 549. 371 | 14240304. 53 |
| M99T475 | 99. 0069813  | 474. 888 | 8101256. 138 |
| M99T501 | 99. 00702067 | 501. 318 | 11113446. 56 |
| M99T712 | 99. 00697588 | 711. 794 | 10897599. 76 |
| M99T486 | 99. 00701437 | 485. 784 | 6874155. 783 |
| M99T775 | 99. 00699897 | 774. 892 | 7782879. 266 |
| M99T238 | 99. 00689862 | 238. 024 | 8176856. 622 |
| M99T782 | 99. 00696287 | 782. 5   | 5707157. 888 |
| M99T407 | 99. 00705047 | 406. 813 | 6015822. 124 |
| M99T698 | 99. 00704393 | 698. 034 | 8231127. 504 |
| M99T93  | 99. 043693   | 92. 9618 | 13795976. 24 |
| M99T109 | 99. 04373606 | 109. 475 | 5474478. 64  |
| M99T146 | 99. 04372904 | 146. 08  | 6805413. 191 |
| M99T410 | 99. 07998046 | 409. 881 | 449517. 5966 |
| M100T45 | 99. 92425623 | 45. 299  | 102455. 9145 |



|            |              |           |              |
|------------|--------------|-----------|--------------|
| M100T52    | 99. 92420142 | 52. 01235 | 107775. 4098 |
| M100T59    | 99. 92424645 | 59. 2937  | 179351. 4065 |
| M100T65_1  | 99. 92424569 | 65. 4825  | 293815. 7932 |
| M100T33    | 99. 92417668 | 32. 8715  | 1006957. 133 |
| M100T778   | 99. 92401792 | 777. 92   | 1735373. 299 |
| M100T835   | 99. 92364612 | 835. 329  | 2793196. 135 |
| M100T51    | 100. 0024816 | 50. 6021  | 327587. 243  |
| M100T65_2  | 100. 0024872 | 65. 0166  | 1873597. 656 |
| M100T40    | 100. 0024881 | 40. 4091  | 1865985. 076 |
| M100T91    | 100. 0387288 | 90. 9026  | 16439473. 31 |
| M101T817   | 100. 9320308 | 817. 214  | 5209306. 417 |
| M101T805_1 | 100. 9320302 | 805. 145  | 3293275. 343 |
| M101T33_1  | 100. 9320659 | 32. 8715  | 1587345. 993 |
| M101T779   | 100. 9319985 | 779. 407  | 3196590. 938 |
| M101T835   | 100. 9320408 | 835. 329  | 7785190. 678 |
| M101T98    | 100. 989964  | 97. 682   | 6082100. 79  |
| M101T187   | 101. 0219623 | 186. 689  | 194028048. 1 |
| M101T433   | 101. 0219987 | 433. 06   | 128487739. 6 |
| M101T411   | 101. 0231014 | 411. 444  | 223336984. 1 |
| M101T124   | 101. 0219117 | 123. 792  | 224227696. 8 |
| M101T117   | 101. 0219074 | 116. 52   | 258664934. 7 |
| M101T600   | 101. 0220297 | 599. 904  | 146407893    |
| M101T472   | 101. 0220273 | 471. 768  | 147003433. 3 |
| M101T205   | 101. 0223548 | 204. 895  | 155830803    |
| M101T212   | 101. 0223944 | 212. 366  | 126676860. 4 |
| M101T744   | 101. 0220137 | 744. 192  | 166700996. 8 |
| M101T795   | 101. 0219733 | 794. 753  | 181939162. 7 |
| M101T535   | 101. 0220169 | 535. 488  | 520341953. 6 |
| M101T147   | 101. 0221514 | 147. 455  | 238148304. 5 |
| M101T197   | 101. 0220055 | 197. 335  | 138382904. 8 |
| M101T344   | 101. 0231095 | 344. 233  | 129099849    |
| M101T609   | 101. 0219951 | 609. 19   | 164494932. 3 |
| M101T266   | 101. 0219132 | 265. 541  | 132692565. 5 |
| M101T464   | 101. 0231077 | 464. 011  | 124592539. 3 |
| M101T136   | 101. 0219735 | 135. 795  | 254212539. 6 |
| M101T766   | 101. 021963  | 765. 588  | 374856371. 9 |
| M101T805_2 | 101. 0220108 | 805. 145  | 115831155. 7 |
| M101T352   | 101. 0230982 | 351. 663  | 131285618. 7 |
| M101T444   | 101. 0231    | 443. 961  | 145173504. 6 |
| M101T688   | 101. 0219654 | 688. 189  | 146570613. 4 |
| M101T361   | 101. 0220263 | 360. 831  | 178144176. 1 |
| M101T332   | 101. 0219511 | 332. 105  | 161343488. 2 |
| M101T509   | 101. 0219664 | 509. 11   | 109117540. 2 |
| M101T285   | 101. 0219751 | 285. 167  | 157009859. 6 |
| M101T577   | 101. 0219982 | 576. 787  | 420755868. 4 |
| M101T376   | 101. 0220261 | 376. 15   | 158344379. 2 |
| M101T175   | 101. 0219275 | 174. 576  | 322719412. 5 |
| M101T634   | 101. 0219157 | 633. 832  | 396697193. 8 |
| M101T452   | 101. 0219934 | 451. 616  | 123323403. 8 |
| M101T716   | 101. 021992  | 716. 391  | 277437077. 1 |
| M101T424   | 101. 0220259 | 423. 877  | 124035815. 8 |
| M101T658   | 101. 0219184 | 658. 372  | 296307169. 7 |
| M101T732   | 101. 0220098 | 731. 793  | 134695994. 3 |
| M101T501   | 101. 0219871 | 501. 318  | 112349903. 7 |

|            |             |          |             |
|------------|-------------|----------|-------------|
| M101T235   | 101.0219278 | 234.972  | 267319445   |
| M101T394   | 101.0220144 | 394.467  | 144641293.2 |
| M101T276   | 101.0231185 | 275.643  | 110712936.7 |
| M101T698   | 101.0219278 | 698.034  | 179923089.4 |
| M101T323   | 101.0219411 | 322.862  | 161247898.8 |
| M101T385   | 101.0220229 | 385.225  | 104602491.6 |
| M101T677   | 101.0219789 | 676.878  | 166221934   |
| M101T825   | 101.0219729 | 824.864  | 148189429.9 |
| M101T490   | 101.0231092 | 490.434  | 238636899.2 |
| M101T95    | 101.0228962 | 95.2383  | 1353316411  |
| M101T303   | 101.0231258 | 303.259  | 124911888.6 |
| M101T254   | 101.0219684 | 253.674  | 142401206.5 |
| M101T349   | 101.0591862 | 348.668  | 288978.812  |
| M101T33_2  | 101.0592096 | 32.8715  | 1288886.912 |
| M101T571   | 101.0585181 | 570.599  | 183247.7864 |
| M102T34    | 101.9792967 | 34.4117  | 147135.3874 |
| M102T57    | 102.0180625 | 57.25235 | 454311.7728 |
| M102T46    | 102.0181294 | 45.7661  | 783678.5851 |
| M102T41    | 102.0181065 | 41.3907  | 882806.5941 |
| M102T51    | 102.0180942 | 50.6021  | 673763.9652 |
| M102T66    | 102.01812   | 66.2043  | 1519575.484 |
| M102T95    | 102.0261092 | 95.2383  | 41157065.66 |
| M102T48    | 102.0544178 | 48.34365 | 184135.5591 |
| M102T55    | 102.0544181 | 54.999   | 141389.8202 |
| M102T63    | 102.0544082 | 63.4597  | 294988.9154 |
| M102T33    | 102.0544411 | 32.8715  | 924608.6739 |
| M102T91    | 102.0543363 | 90.9026  | 43185781.63 |
| M102T308   | 102.0542896 | 307.616  | 6914819.317 |
| M103T50    | 102.9547111 | 50.3393  | 197255.5568 |
| M103T829   | 102.9550671 | 829.321  | 984691.8366 |
| M103T835   | 102.9550833 | 835.329  | 754073.2744 |
| M103T747   | 102.9551236 | 747.194  | 1756966.748 |
| M103T63_1  | 102.9547177 | 62.7487  | 827559.9151 |
| M103T761   | 102.9551432 | 760.976  | 1792814.441 |
| M103T781   | 102.9550868 | 780.958  | 1295130.24  |
| M103T822   | 102.9550862 | 821.831  | 1334617.006 |
| M103T33    | 102.9546962 | 32.8715  | 1253150.34  |
| M103T772_1 | 102.9551011 | 771.785  | 1036969.413 |
| M103T811   | 102.9550954 | 811.292  | 1282051.074 |
| M103T792   | 102.955075  | 791.678  | 1280940.478 |
| M103T802   | 102.9550718 | 802.116  | 1195991.65  |
| M103T713   | 102.9550843 | 713.292  | 1617901.776 |
| M103T733_1 | 102.9551117 | 733.352  | 1644076.379 |
| M103T112   | 102.9871775 | 112.287  | 4031770.462 |
| M103T81_1  | 103.0016578 | 80.6174  | 166803750.8 |
| M103T187   | 103.0024327 | 186.689  | 1187039.614 |
| M103T270   | 103.0381681 | 269.798  | 17980557.3  |
| M103T266   | 103.0382622 | 265.541  | 22802423.94 |
| M103T276   | 103.0388306 | 275.643  | 20171681.89 |
| M103T575   | 103.0388535 | 575.222  | 24578666.28 |
| M103T569   | 103.0381212 | 569.091  | 21956835.53 |
| M103T81_2  | 103.0380715 | 80.6174  | 38467960.7  |
| M103T537   | 103.0382363 | 537.051  | 35743868.64 |
| M103T411   | 103.0381901 | 411.444  | 50505520.88 |

|            |              |          |              |
|------------|--------------|----------|--------------|
| M103T622   | 103. 03879   | 621. 547 | 24695096. 8  |
| M103T498   | 103. 0380681 | 498. 202 | 80716337. 61 |
| M103T557   | 103. 0387593 | 557. 078 | 40425006. 63 |
| M103T58    | 103. 0380002 | 58. 1047 | 32522123. 88 |
| M103T226   | 103. 0388082 | 225. 965 | 36417202. 82 |
| M103T665   | 103. 0379998 | 664. 565 | 17224031. 25 |
| M103T234   | 103. 038122  | 233. 519 | 53257264. 92 |
| M103T442   | 103. 0381666 | 442. 399 | 24812694. 69 |
| M103T458   | 103. 0381982 | 457. 763 | 27496091. 54 |
| M103T136   | 103. 0388507 | 135. 795 | 103357314. 8 |
| M103T193   | 103. 0388163 | 192. 769 | 113378243. 8 |
| M103T51    | 103. 0379825 | 50. 6021 | 14193359. 94 |
| M103T98    | 103. 0380882 | 97. 682  | 49602202. 44 |
| M103T344   | 103. 0388218 | 344. 233 | 73027823. 16 |
| M103T688   | 103. 0387651 | 688. 189 | 20475700. 8  |
| M103T772_2 | 103. 038125  | 771. 785 | 10436875. 94 |
| M103T786   | 103. 0380999 | 785. 593 | 17360567. 88 |
| M103T66    | 103. 0381407 | 66. 2043 | 53659319. 24 |
| M103T476   | 103. 0387824 | 476. 451 | 36093895. 16 |
| M103T246   | 103. 0388601 | 246. 013 | 29368053. 14 |
| M103T285   | 103. 0388465 | 285. 167 | 42193687. 34 |
| M103T675   | 103. 0387705 | 675. 322 | 28004370. 21 |
| M103T305   | 103. 0387462 | 304. 743 | 52733774. 12 |
| M103T173   | 103. 0380539 | 173. 092 | 44153796. 62 |
| M103T425   | 103. 0388479 | 425. 439 | 41334063. 57 |
| M103T257   | 103. 0387891 | 257. 001 | 49269434. 77 |
| M103T764   | 103. 0387778 | 764. 034 | 15074161. 18 |
| M103T718   | 103. 0381277 | 717. 942 | 35874931. 28 |
| M103T467   | 103. 0388244 | 467. 127 | 28565864. 85 |
| M103T381   | 103. 0388288 | 380. 608 | 54996299. 44 |
| M103T362   | 103. 0381108 | 362. 384 | 38194319. 33 |
| M103T115   | 103. 0388532 | 115. 123 | 75110855. 63 |
| M103T657   | 103. 0387935 | 656. 84  | 25141759. 93 |
| M103T394   | 103. 0388138 | 394. 467 | 38504185. 36 |
| M103T698   | 103. 0388292 | 698. 034 | 22399845. 1  |
| M103T323   | 103. 0388144 | 322. 862 | 60642066. 22 |
| M103T798   | 103. 0380996 | 797. 757 | 11147313. 21 |
| M103T526   | 103. 0387869 | 526. 124 | 28759563. 96 |
| M103T733_2 | 103. 038197  | 733. 352 | 28228759. 75 |
| M103T825   | 103. 0380991 | 824. 864 | 22347838. 13 |
| M103T606   | 103. 0387912 | 606. 096 | 47075679. 42 |
| M103T753   | 103. 038131  | 753. 315 | 11540356. 09 |
| M103T82    | 103. 0496382 | 81. 8855 | 117464846. 5 |
| M103T63_2  | 103. 0724505 | 63. 4462 | 416020. 3325 |
| M103T45    | 103. 0724369 | 45. 299  | 367902. 675  |
| M104T81    | 104. 0054079 | 80. 6174 | 4026553. 112 |
| M104T87    | 104. 0336525 | 87. 426  | 133032983    |
| M104T59    | 104. 0417154 | 59. 2937 | 811771. 4789 |
| M104T71    | 104. 0417209 | 70. 607  | 1448976. 066 |
| M104T44    | 104. 041725  | 43. 6868 | 2442608. 622 |
| M104T83    | 104. 0530739 | 82. 8986 | 3372864. 524 |
| M105T274_1 | 104. 9471345 | 273. 82  | 238347. 2089 |
| M105T84_1  | 104. 9823597 | 83. 9405 | 5196556. 296 |
| M105T274_2 | 104. 9817254 | 273. 82  | 51197741. 7  |

|            |             |          |             |
|------------|-------------|----------|-------------|
| M105T84_2  | 105.0172172 | 83.9405  | 894430143.8 |
| M105T98    | 105.017286  | 97.682   | 34738127    |
| M105T87    | 105.0370642 | 87.426   | 2675963.005 |
| M105T84_3  | 105.0524668 | 83.9405  | 6263263.666 |
| M106T274   | 105.9853887 | 273.82   | 1352250.105 |
| M107T274   | 106.9778948 | 273.82   | 3946039.947 |
| M107T84    | 107.022015  | 83.9405  | 5816203.499 |
| M107T379   | 107.0486254 | 379.066  | 1315707.201 |
| M108T205   | 108.0196285 | 204.895  | 676963.0476 |
| M108T136   | 108.0200067 | 135.795  | 250969.0497 |
| M108T531   | 108.0201793 | 530.804  | 305217.8387 |
| M108T182   | 108.0438776 | 182.156  | 5932040.885 |
| M108T232   | 108.0438265 | 231.973  | 2416445.983 |
| M108T466   | 108.0430851 | 465.575  | 2490596.483 |
| M108T299   | 108.043341  | 298.619  | 4589094.901 |
| M108T324   | 108.043465  | 324.413  | 2671620.12  |
| M108T334   | 108.0434047 | 333.655  | 1815680.911 |
| M108T450   | 108.0434584 | 450.052  | 2192840.965 |
| M109T107   | 109.0278328 | 106.648  | 14471862.05 |
| M109T136_1 | 109.0271626 | 135.795  | 9252637.174 |
| M109T453   | 109.0282157 | 453.126  | 30751259.45 |
| M109T51    | 109.0391681 | 51.12755 | 177797.312  |
| M109T127   | 109.0390772 | 126.755  | 1385437.333 |
| M109T167   | 109.0390851 | 167.01   | 1121003.157 |
| M109T63    | 109.0391762 | 62.7487  | 1453746.976 |
| M109T158   | 109.0391051 | 158.1    | 1302797.174 |
| M109T179   | 109.0392028 | 179.046  | 1281153.768 |
| M109T136_2 | 109.0390943 | 135.795  | 2253688.966 |
| M109T115   | 109.0390528 | 115.123  | 1195288.869 |
| M109T40    | 109.0391603 | 40.4091  | 1490823.349 |
| M110T253   | 110.0226797 | 252.703  | 3318473.509 |
| M110T258   | 110.0224249 | 258.208  | 4593352.815 |
| M110T272   | 110.0225474 | 272.312  | 4410579.065 |
| M110T278   | 110.0226339 | 278.267  | 2828950.295 |
| M110T645   | 110.0224962 | 644.722  | 9399770.713 |
| M110T433   | 110.0225486 | 433.06   | 21063253.02 |
| M110T808   | 110.0226443 | 808.251  | 13673146.77 |
| M110T266   | 110.0225857 | 265.541  | 3803927.872 |
| M110T245   | 110.0226488 | 245.353  | 4501483.342 |
| M110T456   | 110.0226568 | 456.2    | 4827357.684 |
| M110T181   | 110.0226831 | 180.601  | 6090775.346 |
| M110T306   | 110.022565  | 306.164  | 26110111.52 |
| M110T723   | 110.0225683 | 722.604  | 7617484.019 |
| M110T106   | 110.0230948 | 105.537  | 17264151.95 |
| M110T223   | 110.0225198 | 222.943  | 9234921.431 |
| M110T209   | 110.0225413 | 209.472  | 12443832.78 |
| M110T353   | 110.0225535 | 353.163  | 24796338.31 |
| M110T687   | 110.0227162 | 687.214  | 7228689.616 |
| M110T188   | 110.0226894 | 188.174  | 5829917.75  |
| M110T147   | 110.0225338 | 147.455  | 8194548.494 |
| M110T608   | 110.0225494 | 607.625  | 6557166.136 |
| M110T615   | 110.0224745 | 615.38   | 5057725.444 |
| M110T464   | 110.0225359 | 464.011  | 6725715.755 |
| M110T556   | 110.0226768 | 555.524  | 7679077.659 |

|            |              |          |              |
|------------|--------------|----------|--------------|
| M110T598   | 110. 0226664 | 598. 341 | 6592247. 296 |
| M110T741   | 110. 0224311 | 741. 077 | 8450450. 372 |
| M110T136   | 110. 0226835 | 135. 795 | 13838435. 64 |
| M110T494   | 110. 0226023 | 493. 56  | 17792894. 33 |
| M110T196   | 110. 0226808 | 195. 791 | 6129039. 675 |
| M110T396   | 110. 0225732 | 396. 023 | 8111698. 576 |
| M110T384   | 110. 0225494 | 383. 727 | 7168581. 292 |
| M110T548   | 110. 0226423 | 547. 805 | 4992033. 318 |
| M110T697   | 110. 0224171 | 697. 061 | 7018879. 2   |
| M110T161   | 110. 0224772 | 161. 184 | 7672133. 085 |
| M110T118   | 110. 0225622 | 117. 954 | 11307292. 69 |
| M110T237   | 110. 0226824 | 236. 518 | 7043118. 321 |
| M110T658   | 110. 022466  | 658. 372 | 12844807. 85 |
| M110T574   | 110. 0224984 | 573. 704 | 12875862. 4  |
| M110T475   | 110. 0226085 | 474. 888 | 5690097. 004 |
| M110T712   | 110. 0224502 | 711. 794 | 10163884. 25 |
| M110T733   | 110. 0223581 | 733. 352 | 5875984. 034 |
| M110T764   | 110. 0223446 | 764. 034 | 6563374. 529 |
| M110T629   | 110. 0225117 | 629. 272 | 6689158. 502 |
| M110T784   | 110. 0225535 | 784. 051 | 6415313. 265 |
| M110T677   | 110. 0225027 | 676. 878 | 8638192. 182 |
| M110T526   | 110. 0226549 | 526. 124 | 19004240. 7  |
| M110T773   | 110. 0225499 | 773. 333 | 5267505. 889 |
| M110T835   | 110. 0224777 | 835. 329 | 3822053. 407 |
| M110T753   | 110. 0225587 | 753. 315 | 5908760. 22  |
| M111T248   | 110. 9414794 | 247. 773 | 362095. 6063 |
| M111T226   | 110. 9414717 | 225. 965 | 1507574. 504 |
| M111T54_1  | 110. 9800978 | 54. 2107 | 59437. 08407 |
| M111T46    | 110. 9802209 | 45. 7661 | 133801. 1141 |
| M111T41    | 110. 9802373 | 41. 3907 | 414511. 4573 |
| M111T66_1  | 110. 9804839 | 66. 2043 | 440722. 9636 |
| M111T45    | 111. 0073477 | 45. 299  | 938193. 3104 |
| M111T59    | 111. 0073361 | 59. 2937 | 718761. 9789 |
| M111T52    | 111. 0073465 | 51. 653  | 985582. 3403 |
| M111T273   | 111. 0064558 | 273. 232 | 3129993. 14  |
| M111T277   | 111. 0066928 | 277. 42  | 5533172. 679 |
| M111T268   | 111. 0065013 | 267. 702 | 2785280. 904 |
| M111T263   | 111. 0066036 | 263. 129 | 3860316. 443 |
| M111T645   | 111. 0067256 | 644. 722 | 3472175. 065 |
| M111T729   | 111. 0066801 | 728. 711 | 4202151. 329 |
| M111T435   | 111. 0065344 | 434. 617 | 3331239. 417 |
| M111T119   | 111. 0063447 | 119. 413 | 36773523. 43 |
| M111T787   | 111. 0071485 | 787. 078 | 7127392. 895 |
| M111T243   | 111. 0065322 | 243. 386 | 5635964. 865 |
| M111T750   | 111. 0067073 | 750. 298 | 4672324. 738 |
| M111T327   | 111. 0066679 | 327. 449 | 7645093. 175 |
| M111T557   | 111. 0066902 | 557. 078 | 3676771. 929 |
| M111T315_1 | 111. 0063815 | 315. 162 | 11491316. 09 |
| M111T106   | 111. 0065116 | 105. 537 | 42135174. 69 |
| M111T810   | 111. 0066239 | 809. 797 | 5404176. 467 |
| M111T391_1 | 111. 006715  | 391. 341 | 3879907. 284 |
| M111T605   | 111. 0065491 | 604. 606 | 4956909. 123 |
| M111T588_1 | 111. 0066094 | 587. 595 | 4572302. 521 |
| M111T232   | 111. 0066714 | 231. 973 | 7627270. 304 |

|            |              |          |              |
|------------|--------------|----------|--------------|
| M111T253   | 111. 0064483 | 252. 703 | 12009869. 86 |
| M111T399   | 111. 0066309 | 399. 086 | 3841868. 564 |
| M111T96    | 111. 0071    | 96. 4922 | 19930912. 63 |
| M111T464   | 111. 0066911 | 464. 011 | 5166456. 713 |
| M111T637   | 111. 006629  | 636. 925 | 4104532. 635 |
| M111T197   | 111. 0066166 | 197. 335 | 7144463. 495 |
| M111T568   | 111. 0067166 | 567. 543 | 6976924. 954 |
| M111T33    | 111. 0073266 | 32. 8715 | 1483898. 884 |
| M111T546   | 111. 0066645 | 546. 308 | 4713778. 982 |
| M111T444   | 111. 0065833 | 443. 961 | 3882805. 016 |
| M111T75_1  | 111. 0071047 | 74. 6705 | 662058448. 1 |
| M111T214   | 111. 0066069 | 213. 897 | 8605401. 272 |
| M111T612   | 111. 0064755 | 612. 3   | 5228833. 756 |
| M111T376   | 111. 0066045 | 376. 15  | 5550817. 77  |
| M111T697   | 111. 0072252 | 697. 061 | 9182104. 978 |
| M111T597   | 111. 0065717 | 596. 795 | 3396491. 292 |
| M111T175   | 111. 0072242 | 174. 576 | 74273039. 28 |
| M111T452   | 111. 0066075 | 451. 616 | 3742683. 462 |
| M111T508   | 111. 0072167 | 507. 55  | 19827131. 36 |
| M111T716   | 111. 0065639 | 716. 391 | 4866289. 202 |
| M111T738   | 111. 006721  | 737. 955 | 4161674. 875 |
| M111T629   | 111. 0066402 | 629. 272 | 4029433. 791 |
| M111T352   | 111. 0064998 | 351. 663 | 19000316. 27 |
| M111T294   | 111. 0064545 | 294. 152 | 15477723. 32 |
| M111T475_1 | 111. 0066891 | 474. 888 | 4369614. 413 |
| M111T408   | 111. 0072483 | 408. 368 | 7322302. 188 |
| M111T764   | 111. 0067092 | 764. 034 | 4342035. 683 |
| M111T53    | 111. 0181316 | 53. 326  | 22430240. 91 |
| M111T271   | 111. 0179916 | 270. 519 | 29579530. 62 |
| M111T266   | 111. 0179596 | 265. 541 | 33578803. 61 |
| M111T276   | 111. 0179327 | 275. 643 | 23152037. 51 |
| M111T681   | 111. 0181103 | 681. 406 | 46623310. 34 |
| M111T537   | 111. 0191363 | 537. 051 | 239469121. 8 |
| M111T413   | 111. 0181646 | 413. 006 | 106739480. 7 |
| M111T456   | 111. 0179332 | 456. 2   | 49266181. 54 |
| M111T315_2 | 111. 0179409 | 315. 162 | 48255678. 35 |
| M111T245   | 111. 0179365 | 245. 353 | 87321706. 34 |
| M111T789   | 111. 0179366 | 788. 604 | 104062300. 8 |
| M111T209   | 111. 0179571 | 209. 472 | 135209060. 2 |
| M111T688   | 111. 0179337 | 688. 189 | 61275340. 41 |
| M111T84_1  | 111. 0180911 | 83. 9405 | 73298065. 9  |
| M111T449   | 111. 0180021 | 448. 527 | 56869238. 63 |
| M111T436   | 111. 0180298 | 436. 18  | 73799492. 68 |
| M111T588_2 | 111. 0179088 | 587. 595 | 70516951. 92 |
| M111T167   | 111. 0179542 | 167. 01  | 116614051. 2 |
| M111T147   | 111. 0179955 | 147. 455 | 127514434. 1 |
| M111T391_2 | 111. 0191445 | 391. 341 | 134253539. 3 |
| M111T102   | 111. 0179763 | 101. 563 | 60063229. 77 |
| M111T755   | 111. 0177209 | 754. 814 | 121410650. 6 |
| M111T234   | 111. 0191592 | 233. 519 | 56959056. 24 |
| M111T188   | 111. 0179837 | 188. 174 | 117463143. 5 |
| M111T326   | 111. 0179876 | 325. 901 | 71421710. 81 |
| M111T620   | 111. 0179328 | 619. 986 | 333081266. 1 |
| M111T666   | 111. 0190796 | 666. 058 | 45084036. 37 |

|            |              |          |              |
|------------|--------------|----------|--------------|
| M111T114   | 111. 0180092 | 113. 762 | 78734692. 57 |
| M111T577   | 111. 0179417 | 576. 787 | 76106951. 63 |
| M111T361   | 111. 0179561 | 360. 831 | 89435609. 59 |
| M111T674   | 111. 0179492 | 673. 771 | 65157234. 68 |
| M111T569   | 111. 0179133 | 569. 091 | 59132243. 5  |
| M111T772   | 111. 0179145 | 771. 785 | 66904314. 86 |
| M111T66_2  | 111. 0179707 | 66. 2043 | 81129926. 74 |
| M111T308   | 111. 0179212 | 307. 616 | 73979622. 53 |
| M111T285   | 111. 0179831 | 285. 167 | 72038667. 42 |
| M111T341   | 111. 0180078 | 341. 266 | 88813436. 35 |
| M111T467   | 111. 0179561 | 467. 127 | 68816410. 64 |
| M111T475_2 | 111. 0179846 | 474. 888 | 61016054. 76 |
| M111T425   | 111. 0179516 | 425. 439 | 72407444. 48 |
| M111T509   | 111. 0179126 | 509. 11  | 53289537. 47 |
| M111T718   | 111. 0179423 | 717. 942 | 64602252. 57 |
| M111T133   | 111. 0180097 | 132. 707 | 120691017. 5 |
| M111T802   | 111. 0175461 | 802. 116 | 178079747. 7 |
| M111T698   | 111. 0179513 | 698. 034 | 98660953. 36 |
| M111T657   | 111. 0191258 | 656. 84  | 86539970. 63 |
| M111T733   | 111. 0191301 | 733. 352 | 98323765. 24 |
| M111T490   | 111. 0179551 | 490. 434 | 97159235. 95 |
| M111T187   | 111. 0433161 | 186. 689 | 7266040. 39  |
| M111T84_2  | 111. 0438604 | 83. 9405 | 13981928. 36 |
| M111T158   | 111. 0433262 | 158. 1   | 4865577. 515 |
| M111T176   | 111. 042501  | 176. 104 | 9625243. 546 |
| M111T75_2  | 111. 0451311 | 74. 6705 | 2923440. 099 |
| M111T303   | 111. 0432588 | 303. 259 | 704066. 6598 |
| M111T54_2  | 111. 056211  | 53. 948  | 53879. 24013 |
| M111T65    | 111. 0561836 | 65. 4825 | 333458. 3052 |
| M111T43    | 111. 0565535 | 43. 4241 | 732371. 8535 |
| M112T54    | 112. 0018152 | 53. 7816 | 322910. 9676 |
| M112T61_1  | 112. 0018593 | 60. 7882 | 329033. 1854 |
| M112T43_1  | 112. 0022471 | 42. 8986 | 2113995. 551 |
| M112T75    | 112. 0104952 | 74. 6705 | 29978975. 01 |
| M112T175   | 112. 0104479 | 174. 576 | 3186974. 815 |
| M112T352   | 112. 010508  | 351. 663 | 288377. 0131 |
| M112T294   | 112. 0104354 | 294. 152 | 342349. 1606 |
| M112T146   | 112. 0105477 | 146. 08  | 1478421. 198 |
| M112T254   | 112. 0105311 | 253. 674 | 217377. 9767 |
| M112T93    | 112. 0149634 | 92. 9618 | 12015855. 84 |
| M112T147   | 112. 0218252 | 147. 455 | 4311658. 603 |
| M112T43_2  | 112. 0216643 | 43. 4241 | 4971981. 996 |
| M112T56    | 112. 021058  | 55. 677  | 695807. 4326 |
| M112T66    | 112. 0211633 | 66. 2043 | 2305635. 428 |
| M112T303   | 112. 0382279 | 303. 259 | 1750261. 637 |
| M112T47    | 112. 0500525 | 47. 1331 | 183508. 2813 |
| M112T769   | 112. 0495104 | 768. 696 | 2060062. 497 |
| M112T61_2  | 112. 050039  | 61. 4369 | 1546273. 206 |
| M112T807   | 112. 0494793 | 806. 698 | 1584386. 628 |
| M112T790   | 112. 0495189 | 790. 161 | 1623579. 055 |
| M112T715   | 112. 0491878 | 714. 841 | 3590518. 213 |
| M112T741   | 112. 0494711 | 741. 077 | 1758094. 624 |
| M112T781   | 112. 049472  | 780. 958 | 1919207. 885 |
| M112T33    | 112. 0495645 | 32. 8715 | 1466418. 069 |

|            |              |          |              |
|------------|--------------|----------|--------------|
| M112T816   | 112. 049483  | 815. 664 | 3756552. 659 |
| M112T799   | 112. 0495004 | 799. 306 | 1891908. 496 |
| M112T732   | 112. 049477  | 731. 793 | 1594370. 89  |
| M112T758   | 112. 0494425 | 757. 881 | 2582947. 11  |
| M112T835   | 112. 0495052 | 835. 329 | 2974932. 336 |
| M113T48    | 112. 944991  | 48. 1607 | 58391. 4757  |
| M113T33_1  | 112. 9450349 | 32. 8715 | 194367. 3529 |
| M113T87_1  | 112. 9448584 | 87. 426  | 1309630. 72  |
| M113T66_1  | 112. 9450491 | 66. 2043 | 210585. 427  |
| M113T601   | 112. 9831021 | 601. 473 | 43045495. 03 |
| M113T539   | 112. 9850059 | 538. 619 | 57637499. 24 |
| M113T687   | 112. 9831584 | 687. 214 | 131551089    |
| M113T665   | 112. 9832534 | 664. 565 | 46807078. 63 |
| M113T609   | 112. 9832153 | 609. 19  | 53028198. 74 |
| M113T578_1 | 112. 9831227 | 578. 353 | 132773561. 3 |
| M113T724   | 112. 9832412 | 724. 158 | 240253858. 3 |
| M113T655   | 112. 9832292 | 655. 321 | 54805419. 86 |
| M113T33_2  | 112. 9840514 | 32. 8715 | 26509265. 76 |
| M113T87_2  | 112. 9840481 | 87. 426  | 212486775    |
| M113T637   | 112. 9832333 | 636. 925 | 130754272. 7 |
| M113T811   | 112. 9853018 | 811. 292 | 209848316. 2 |
| M113T66_2  | 112. 9840587 | 66. 2043 | 65013979. 99 |
| M113T509   | 112. 9850141 | 509. 11  | 34732246. 44 |
| M113T501   | 112. 9849784 | 501. 318 | 47894709. 53 |
| M113T492   | 112. 9849911 | 491. 99  | 41547867. 71 |
| M113T764_1 | 112. 9831749 | 764. 034 | 53101673. 63 |
| M113T526   | 112. 9849523 | 526. 124 | 39904489. 27 |
| M113T773   | 112. 9832489 | 773. 333 | 47417879. 51 |
| M113T782   | 112. 9850365 | 782. 5   | 37396272. 45 |
| M113T54    | 112. 9974258 | 53. 6853 | 698576. 4423 |
| M113T66_3  | 112. 997476  | 66. 2043 | 2831447. 441 |
| M113T44    | 112. 9974709 | 43. 6868 | 4041392. 833 |
| M113T253   | 113. 0219478 | 252. 703 | 19812714. 62 |
| M113T257   | 113. 0235246 | 257. 001 | 14656986. 79 |
| M113T455   | 113. 0220254 | 454. 645 | 24978319. 76 |
| M113T435   | 113. 0220765 | 434. 617 | 22660887. 19 |
| M113T311   | 113. 0220206 | 310. 626 | 26812100. 42 |
| M113T411   | 113. 022075  | 411. 444 | 39327561. 75 |
| M113T245   | 113. 0219548 | 245. 353 | 28625194. 34 |
| M113T327   | 113. 023456  | 327. 449 | 52909036. 54 |
| M113T205   | 113. 0219454 | 204. 895 | 29588884. 74 |
| M113T212   | 113. 0219673 | 212. 366 | 32659958. 98 |
| M113T535   | 113. 0220838 | 535. 488 | 30023946. 72 |
| M113T730   | 113. 0235244 | 730. 264 | 66405145. 43 |
| M113T442   | 113. 0234972 | 442. 399 | 33522301. 06 |
| M113T147   | 113. 0217898 | 147. 455 | 69856817. 43 |
| M113T197   | 113. 0217172 | 197. 335 | 31945198. 4  |
| M113T578_2 | 113. 0233971 | 578. 353 | 102541520. 9 |
| M113T266   | 113. 0220282 | 265. 541 | 17248314. 89 |
| M113T515   | 113. 022012  | 515. 338 | 24863228. 75 |
| M113T107   | 113. 0217859 | 106. 648 | 339103466. 6 |
| M113T500   | 113. 0220102 | 499. 759 | 29251207. 73 |
| M113T470   | 113. 0220691 | 470. 253 | 51190513. 63 |
| M113T635   | 113. 0235157 | 635. 37  | 79124957. 12 |



|            |             |         |             |
|------------|-------------|---------|-------------|
| M113T93    | 113.0217014 | 92.9618 | 1140500455  |
| M113T688   | 113.0220105 | 688.189 | 29939143.34 |
| M113T508   | 113.0220606 | 507.55  | 18227805.8  |
| M113T224   | 113.0219449 | 224.484 | 47419012.5  |
| M113T352   | 113.0220747 | 351.663 | 23715322.76 |
| M113T285   | 113.0220487 | 285.167 | 33671232.38 |
| M113T376   | 113.0220524 | 376.15  | 32724420.57 |
| M113T175_1 | 113.0217028 | 174.576 | 72835671.58 |
| M113T118   | 113.0216603 | 117.954 | 177133491.7 |
| M113T303   | 113.0220363 | 303.259 | 30897038.88 |
| M113T658   | 113.0234008 | 658.372 | 58552926.39 |
| M113T424   | 113.0220799 | 423.877 | 28531562.79 |
| M113T235   | 113.0219464 | 234.972 | 37254170.15 |
| M113T764_2 | 113.0219844 | 764.034 | 28306589.64 |
| M113T552   | 113.0220329 | 552.493 | 20969945.27 |
| M113T525   | 113.0219833 | 524.56  | 24862869.54 |
| M113T359   | 113.0219634 | 359.297 | 27434961.31 |
| M113T394   | 113.0216991 | 394.467 | 46744768.72 |
| M113T276   | 113.0234006 | 275.643 | 13146251.61 |
| M113T698   | 113.0219672 | 698.034 | 33600328.86 |
| M113T713   | 113.0219947 | 713.292 | 45730152.48 |
| M113T677   | 113.0220243 | 676.878 | 33492540.86 |
| M113T814   | 113.0233958 | 814.118 | 188144535.4 |
| M113T160   | 113.0217373 | 159.635 | 67070686.27 |
| M113T753   | 113.0219637 | 753.315 | 31933592.88 |
| M113T137   | 113.0216887 | 137.226 | 72922792.59 |
| M113T82    | 113.033767  | 81.8855 | 20715456.73 |
| M113T87_3  | 113.0337932 | 87.426  | 23607980.05 |
| M113T33_3  | 113.0340986 | 32.8715 | 308919.6618 |
| M113T272   | 113.059295  | 272.312 | 2547744.176 |
| M113T175_2 | 113.0594204 | 174.576 | 2075145.661 |
| M113T294   | 113.0592407 | 294.152 | 1420761.154 |
| M114T50_1  | 113.9872591 | 50.0766 | 380294.7612 |
| M114T44    | 113.9872651 | 44.0652 | 473605.7613 |
| M114T63    | 113.9873053 | 62.7487 | 985340.7087 |
| M114T33_1  | 113.9872672 | 32.8715 | 597021.4948 |
| M114T87    | 113.987399  | 87.426  | 3806585.589 |
| M114T50_2  | 114.0175388 | 50.3393 | 318107.8924 |
| M114T64    | 114.0173974 | 64.0412 | 690024.357  |
| M114T69    | 114.0175208 | 69.1983 | 2041954.722 |
| M114T106_1 | 114.018083  | 105.537 | 3001568.488 |
| M114T93    | 114.0259581 | 92.9618 | 60328774.63 |
| M114T47    | 114.0543533 | 46.6732 | 712454.8902 |
| M114T55    | 114.0543284 | 55.2617 | 566970.4823 |
| M114T60    | 114.0543631 | 60.4002 | 1399441.855 |
| M114T789   | 114.053927  | 788.604 | 6197226.069 |
| M114T106_2 | 114.0543257 | 105.537 | 47598815.56 |
| M114T810   | 114.0537765 | 809.797 | 8647649.013 |
| M114T730   | 114.0537403 | 730.264 | 6005370.18  |
| M114T761   | 114.0537889 | 760.976 | 8231502.001 |
| M114T693   | 114.0537666 | 692.781 | 4752683.443 |
| M114T741   | 114.0537866 | 741.077 | 7426226.639 |
| M114T33_2  | 114.0540711 | 32.8715 | 3423493.876 |
| M114T704   | 114.0538347 | 704.046 | 6490193.96  |

|            |              |          |              |
|------------|--------------|----------|--------------|
| M114T822   | 114. 0537827 | 821. 831 | 7656669. 645 |
| M114T778   | 114. 0539575 | 777. 92  | 7397312. 664 |
| M114T68    | 114. 0540827 | 67. 6441 | 1182463. 831 |
| M114T718   | 114. 0537797 | 717. 942 | 5047619. 821 |
| M114T798   | 114. 0539867 | 797. 757 | 6795101. 006 |
| M114T835   | 114. 0537981 | 835. 329 | 8425739. 547 |
| M115T48    | 114. 932541  | 47. 7826 | 106635. 5116 |
| M115T56    | 114. 9325461 | 55. 7307 | 120531. 9233 |
| M115T810   | 114. 9331247 | 809. 797 | 1751419. 91  |
| M115T64    | 114. 9325661 | 64. 0412 | 235186. 4571 |
| M115T33_1  | 114. 9334418 | 32. 8715 | 1272307. 871 |
| M115T819   | 114. 932408  | 818. 743 | 1964166. 129 |
| M115T778   | 114. 932535  | 777. 92  | 715133. 0138 |
| M115T835_1 | 114. 9329818 | 835. 329 | 3561857. 846 |
| M115T164   | 114. 9873165 | 164. 077 | 5349887. 168 |
| M115T139   | 114. 9873827 | 138. 719 | 4194342. 272 |
| M115T87    | 114. 9871829 | 87. 426  | 3210874. 462 |
| M115T112   | 114. 9871924 | 112. 287 | 9806553. 793 |
| M115T78    | 115. 001632  | 78. 2661 | 516626063. 1 |
| M115T106   | 115. 0014917 | 105. 537 | 15332127. 28 |
| M115T324   | 115. 0014686 | 324. 413 | 5754510. 877 |
| M115T95_1  | 115. 0015826 | 95. 2383 | 42468827. 59 |
| M115T334   | 115. 0014571 | 333. 655 | 4197029. 13  |
| M115T65    | 115. 0132801 | 65. 4825 | 302377. 1802 |
| M115T266   | 115. 0377262 | 265. 541 | 8901317. 686 |
| M115T271   | 115. 0377372 | 270. 519 | 5879974. 592 |
| M115T82    | 115. 0383027 | 81. 8855 | 30869959. 09 |
| M115T119   | 115. 0377773 | 119. 413 | 63535187. 37 |
| M115T813   | 115. 0380412 | 812. 68  | 8799193. 936 |
| M115T306   | 115. 0380729 | 306. 164 | 14486772. 48 |
| M115T285   | 115. 0382228 | 285. 167 | 11029708. 92 |
| M115T795   | 115. 0380608 | 794. 753 | 12955712. 19 |
| M115T535   | 115. 0378127 | 535. 488 | 11164942. 35 |
| M115T520   | 115. 0378626 | 519. 998 | 17608835. 78 |
| M115T278   | 115. 0377796 | 278. 267 | 7493963. 706 |
| M115T680   | 115. 0380487 | 679. 873 | 10052769. 56 |
| M115T609   | 115. 0380342 | 609. 19  | 12157869. 25 |
| M115T746   | 115. 037867  | 745. 747 | 10949536. 01 |
| M115T805   | 115. 0380947 | 805. 145 | 7423452. 22  |
| M115T823   | 115. 0380829 | 823. 375 | 11469592. 65 |
| M115T326   | 115. 0382921 | 325. 901 | 16016960. 48 |
| M115T172   | 115. 0380593 | 171. 546 | 23202227. 2  |
| M115T206   | 115. 0377635 | 206. 399 | 24931420. 59 |
| M115T688   | 115. 0380878 | 688. 189 | 9336200. 986 |
| M115T546   | 115. 0378423 | 546. 308 | 12310382. 12 |
| M115T161   | 115. 0380822 | 161. 184 | 15294436. 54 |
| M115T772   | 115. 0380387 | 771. 785 | 9299750. 79  |
| M115T671   | 115. 0378036 | 670. 674 | 8160607. 329 |
| M115T388   | 115. 0378059 | 388. 326 | 45780955. 32 |
| M115T476   | 115. 0377639 | 476. 451 | 10159712. 38 |
| M115T637   | 115. 0382133 | 636. 925 | 29357223. 62 |
| M115T720   | 115. 0377521 | 719. 505 | 11758313. 34 |
| M115T341   | 115. 0377572 | 341. 266 | 11833403. 53 |
| M115T577   | 115. 0380709 | 576. 787 | 32442896. 08 |

|            |              |          |              |
|------------|--------------|----------|--------------|
| M115T154   | 115. 03791   | 153. 601 | 13823726. 94 |
| M115T425   | 115. 0377856 | 425. 439 | 11025976. 65 |
| M115T257   | 115. 0377606 | 257. 001 | 10154085. 81 |
| M115T446   | 115. 0378061 | 445. 522 | 21278996. 52 |
| M115T294   | 115. 0378484 | 294. 152 | 12340925. 66 |
| M115T352   | 115. 0377727 | 351. 663 | 11502366. 01 |
| M115T764   | 115. 038047  | 764. 034 | 9268018. 113 |
| M115T467   | 115. 0382842 | 467. 127 | 13355471. 89 |
| M115T185   | 115. 0378729 | 185. 252 | 27506467. 98 |
| M115T700   | 115. 0381106 | 699. 592 | 11812345. 22 |
| M115T238   | 115. 0377611 | 238. 024 | 36482652. 11 |
| M115T657   | 115. 0380671 | 656. 84  | 10808618. 32 |
| M115T733   | 115. 0378017 | 733. 352 | 14219012. 04 |
| M115T95_2  | 115. 038327  | 95. 2383 | 65562644. 97 |
| M115T753   | 115. 0377968 | 753. 315 | 8085926. 609 |
| M115T835_2 | 115. 0378402 | 835. 329 | 8603761. 6   |
| M115T503   | 115. 038069  | 502. 873 | 19719758. 52 |
| M115T782   | 115. 0378207 | 782. 5   | 10561019. 64 |
| M115T137   | 115. 037729  | 137. 226 | 23161485. 82 |
| M115T33_2  | 115. 0580497 | 32. 8715 | 151434. 0827 |
| M115T33_3  | 115. 074889  | 32. 8715 | 613207. 7732 |
| M115T274   | 115. 0748375 | 273. 82  | 105357. 375  |
| M115T43    | 115. 0747957 | 42. 8986 | 87941. 47215 |
| M116T50    | 115. 918642  | 50. 0766 | 307944. 6595 |
| M116T67    | 115. 9186489 | 67. 1831 | 1924320. 104 |
| M116T781   | 115. 9184475 | 780. 958 | 87406405. 17 |
| M116T33_1  | 115. 9185846 | 32. 8715 | 13621083. 7  |
| M116T115   | 115. 9191584 | 115. 123 | 10890716. 96 |
| M116T825   | 115. 9185075 | 824. 864 | 21055995. 7  |
| M116T835_1 | 115. 9184792 | 835. 329 | 30607340. 88 |
| M116T112   | 115. 9878956 | 112. 287 | 1000425. 046 |
| M116T78    | 116. 0052386 | 78. 2661 | 16045662. 49 |
| M116T769   | 116. 0333339 | 768. 696 | 3815893. 767 |
| M116T787   | 116. 0333072 | 787. 078 | 6456932. 257 |
| M116T267   | 116. 0332911 | 266. 709 | 5305348. 238 |
| M116T306   | 116. 0332937 | 306. 164 | 7617727. 95  |
| M116T730   | 116. 033288  | 730. 264 | 20228815. 93 |
| M116T665   | 116. 0332986 | 664. 565 | 4131617. 171 |
| M116T776   | 116. 0333311 | 776. 391 | 3185689. 503 |
| M116T568   | 116. 033293  | 567. 543 | 4556195. 935 |
| M116T543   | 116. 0333547 | 543. 216 | 18790489. 01 |
| M116T823   | 116. 0332682 | 823. 375 | 3818816. 575 |
| M116T805   | 116. 0333549 | 805. 145 | 5956104. 606 |
| M116T589   | 116. 0332731 | 589. 157 | 8832101. 65  |
| M116T759   | 116. 0332996 | 759. 428 | 3815856. 056 |
| M116T675   | 116. 0332866 | 675. 322 | 7249505. 456 |
| M116T469   | 116. 0333339 | 468. 69  | 5145554. 682 |
| M116T318   | 116. 0332871 | 318. 232 | 5723802. 779 |
| M116T278_1 | 116. 0333155 | 278. 267 | 12041760. 08 |
| M116T509_1 | 116. 033326  | 509. 11  | 4389402. 381 |
| M116T575   | 116. 0332311 | 575. 222 | 6840960. 686 |
| M116T92    | 116. 0337352 | 91. 9113 | 7478319. 342 |
| M116T629   | 116. 0333096 | 629. 272 | 20923225. 75 |
| M116T690   | 116. 0333225 | 689. 75  | 11288694. 09 |

|            |              |          |              |
|------------|--------------|----------|--------------|
| M116T394_1 | 116. 0333247 | 394. 467 | 8719499. 24  |
| M116T343   | 116. 0333813 | 342. 819 | 5893973. 843 |
| M116T359   | 116. 0333767 | 359. 297 | 8388749. 29  |
| M116T490   | 116. 0333223 | 490. 434 | 9029055. 268 |
| M116T334   | 116. 0333342 | 333. 655 | 4439696. 384 |
| M116T835_2 | 116. 0333332 | 835. 329 | 2948426. 033 |
| M116T439   | 116. 0333205 | 439. 27  | 21176983. 71 |
| M116T46    | 116. 0418779 | 45. 7321 | 125786. 6277 |
| M116T65    | 116. 0418761 | 65. 0166 | 538362. 0615 |
| M116T266   | 116. 0694633 | 265. 541 | 11573307. 11 |
| M116T271   | 116. 069526  | 270. 519 | 4571628. 539 |
| M116T284   | 116. 0695094 | 283. 634 | 10079560. 76 |
| M116T278_2 | 116. 0694767 | 278. 267 | 6198831. 187 |
| M116T291   | 116. 0695306 | 291. 076 | 8466326. 598 |
| M116T309   | 116. 0695147 | 309. 091 | 17034687. 6  |
| M116T181   | 116. 069593  | 180. 601 | 25557980. 67 |
| M116T245   | 116. 0694675 | 245. 353 | 9970341. 108 |
| M116T789   | 116. 0694931 | 788. 604 | 34400142. 42 |
| M116T706   | 116. 0705132 | 705. 593 | 92254416. 09 |
| M116T747   | 116. 0694803 | 747. 194 | 23234568. 92 |
| M116T831   | 116. 0704467 | 830. 813 | 65808016. 08 |
| M116T481   | 116. 0694659 | 481. 089 | 33749935. 14 |
| M116T127   | 116. 0695243 | 126. 755 | 29776970. 79 |
| M116T520   | 116. 0694771 | 519. 998 | 18445604. 32 |
| M116T167   | 116. 0695045 | 167. 01  | 13922925. 35 |
| M116T373   | 116. 0695526 | 373. 196 | 14039613. 54 |
| M116T317   | 116. 069504  | 316. 709 | 10696663. 85 |
| M116T609   | 116. 0694667 | 609. 19  | 56846043. 37 |
| M116T540   | 116. 069521  | 540. 152 | 18465697. 37 |
| M116T560   | 116. 0695097 | 560. 119 | 12310933. 65 |
| M116T107   | 116. 069598  | 106. 648 | 60511237. 72 |
| M116T761   | 116. 0694746 | 760. 976 | 27914453. 87 |
| M116T458   | 116. 0694834 | 457. 763 | 36335546. 25 |
| M116T224   | 116. 0694637 | 224. 484 | 11141207. 82 |
| M116T217   | 116. 0694688 | 216. 95  | 17425375. 81 |
| M116T33_2  | 116. 0698992 | 32. 8715 | 14343930. 39 |
| M116T655   | 116. 0693453 | 655. 321 | 25667395. 19 |
| M116T577   | 116. 0694767 | 576. 787 | 19742545. 06 |
| M116T255   | 116. 0695221 | 255. 113 | 14120230. 41 |
| M116T631   | 116. 0694979 | 630. 737 | 23826979. 28 |
| M116T569   | 116. 0694697 | 569. 091 | 14205387. 07 |
| M116T552   | 116. 0694736 | 552. 493 | 18291525. 86 |
| M116T424   | 116. 0695458 | 423. 877 | 29127069. 98 |
| M116T394_2 | 116. 0695704 | 394. 467 | 11849905. 98 |
| M116T402   | 116. 0694602 | 402. 144 | 13772374. 51 |
| M116T509_2 | 116. 0694697 | 509. 11  | 23246706. 73 |
| M116T235   | 116. 0694971 | 234. 972 | 16090371. 53 |
| M116T340   | 116. 0695555 | 339. 772 | 24599237. 36 |
| M116T802   | 116. 0694963 | 802. 116 | 27144115. 7  |
| M116T358   | 116. 0694587 | 357. 746 | 23911627. 76 |
| M116T146   | 116. 0700594 | 146. 08  | 41315121. 64 |
| M116T531   | 116. 0694977 | 530. 804 | 16890947. 46 |
| M116T640   | 116. 0704439 | 640. 057 | 21308655. 59 |
| M116T385   | 116. 0695745 | 385. 225 | 15086388. 61 |

|            |              |           |              |
|------------|--------------|-----------|--------------|
| M116T773   | 116. 0694647 | 773. 333  | 31534922. 14 |
| M116T199   | 116. 0695292 | 198. 821  | 23346303. 75 |
| M116T672   | 116. 0705771 | 672. 229  | 14318349. 07 |
| M117T33_1  | 116. 8858539 | 32. 8715  | 118755. 7956 |
| M117T51    | 116. 9267913 | 50. 60205 | 3124473. 836 |
| M117T750_1 | 116. 9266921 | 750. 298  | 7214709. 002 |
| M117T789_1 | 116. 9266908 | 788. 604  | 18146242. 37 |
| M117T807   | 116. 9266399 | 806. 698  | 84799546. 88 |
| M117T117   | 116. 9269778 | 116. 52   | 23159560. 95 |
| M117T65    | 116. 9273866 | 65. 4825  | 9785037. 716 |
| M117T766   | 116. 9266545 | 765. 588  | 14758853. 03 |
| M117T206   | 116. 9269748 | 206. 399  | 14611285. 5  |
| M117T33_2  | 116. 9262217 | 32. 8715  | 21440495. 07 |
| M117T778   | 116. 926649  | 777. 92   | 25046673. 47 |
| M117T738   | 116. 9266865 | 737. 955  | 7899355. 959 |
| M117T294   | 116. 9267014 | 294. 152  | 6760445. 47  |
| M117T835_1 | 116. 9266586 | 835. 329  | 66056459. 54 |
| M117T79_1  | 116. 9769499 | 79. 4105  | 3120419. 7   |
| M117T79_2  | 117. 0172703 | 79. 4105  | 660034506    |
| M117T187_1 | 117. 0172434 | 186. 689  | 15680620. 35 |
| M117T435   | 117. 017379  | 434. 617  | 13206558. 65 |
| M117T411   | 117. 0173793 | 411. 444  | 11161748. 66 |
| M117T291   | 117. 0173198 | 291. 076  | 11834083. 61 |
| M117T311   | 117. 017392  | 310. 626  | 12363990. 9  |
| M117T750_2 | 117. 017723  | 750. 298  | 28764434. 31 |
| M117T375   | 117. 0172546 | 374. 746  | 18430354. 28 |
| M117T622   | 117. 0174011 | 621. 547  | 13089407. 97 |
| M117T557   | 117. 0173905 | 557. 078  | 9537527. 522 |
| M117T331   | 117. 0173782 | 330. 552  | 7996432. 084 |
| M117T789_2 | 117. 0173787 | 788. 604  | 25941571. 97 |
| M117T226   | 117. 0174032 | 225. 965  | 13407050. 52 |
| M117T687   | 117. 0174195 | 687. 214  | 10612578. 09 |
| M117T665_1 | 117. 017398  | 664. 565  | 7436913. 249 |
| M117T212   | 117. 0172444 | 212. 366  | 11747499. 76 |
| M117T578   | 117. 0173941 | 578. 353  | 27007812. 1  |
| M117T540   | 117. 0173912 | 540. 152  | 8613414. 852 |
| M117T449   | 117. 0173692 | 448. 527  | 10100061. 06 |
| M117T609   | 117. 0177271 | 609. 19   | 11705529. 15 |
| M117T266_1 | 117. 0172429 | 265. 541  | 7863155. 245 |
| M117T158   | 117. 0172301 | 158. 1    | 12691000. 22 |
| M117T823   | 117. 0173715 | 823. 375  | 5758267. 216 |
| M117T197   | 117. 0172425 | 197. 335  | 18255838. 76 |
| M117T344   | 117. 0174095 | 344. 233  | 10689852. 95 |
| M117T655   | 117. 0174    | 655. 321  | 12384672. 19 |
| M117T255   | 117. 0172362 | 255. 113  | 10092404. 08 |
| M117T321   | 117. 0173888 | 321. 312  | 7932450. 443 |
| M117T404_1 | 117. 0173856 | 403. 698  | 7783667. 487 |
| M117T532   | 117. 017238  | 532. 372  | 6366322. 502 |
| M117T246   | 117. 0173951 | 246. 013  | 9231785. 151 |
| M117T300   | 117. 0173898 | 300. 176  | 9234789. 724 |
| M117T675   | 117. 0173989 | 675. 322  | 11389099. 74 |
| M117T173_1 | 117. 0172696 | 173. 092  | 12967290. 55 |
| M117T425_1 | 117. 0173779 | 425. 439  | 9916927. 354 |
| M117T278   | 117. 0172907 | 278. 267  | 10346970. 23 |

|            |              |          |              |
|------------|--------------|----------|--------------|
| M117T525   | 117. 0172405 | 524. 56  | 10035253. 45 |
| M117T718   | 117. 0172481 | 717. 942 | 6973193. 782 |
| M117T475_1 | 117. 0172401 | 474. 888 | 28907520. 41 |
| M117T92    | 117. 0173422 | 91. 9113 | 33944110. 1  |
| M117T394   | 117. 0172542 | 394. 467 | 12093483. 45 |
| M117T698   | 117. 0173808 | 698. 034 | 7946752. 945 |
| M117T835_2 | 117. 0173702 | 835. 329 | 6679201. 277 |
| M117T503   | 117. 0172458 | 502. 873 | 11089823. 2  |
| M117T137   | 117. 0172253 | 137. 226 | 39762071. 39 |
| M117T638   | 117. 0172373 | 638. 484 | 13553750. 46 |
| M117T167   | 117. 0537072 | 167. 01  | 5105394. 188 |
| M117T173_2 | 117. 053939  | 173. 092 | 7045094. 485 |
| M117T79_3  | 117. 0590676 | 79. 4105 | 3761777. 719 |
| M117T187_2 | 117. 0539276 | 186. 689 | 11925803. 98 |
| M117T413   | 117. 053699  | 413. 006 | 5586400. 088 |
| M117T787   | 117. 0537392 | 787. 078 | 2961340. 335 |
| M117T767   | 117. 0537173 | 767. 145 | 8003626. 41  |
| M117T813   | 117. 0537476 | 812. 68  | 3888901. 643 |
| M117T245   | 117. 0535661 | 245. 353 | 7138101. 503 |
| M117T203   | 117. 0535959 | 203. 346 | 6518104. 734 |
| M117T625   | 117. 0539609 | 624. 642 | 19640499. 75 |
| M117T223   | 117. 0537167 | 222. 943 | 6632387. 629 |
| M117T834   | 117. 0537546 | 833. 866 | 3188987. 191 |
| M117T266_2 | 117. 0535635 | 265. 541 | 3396753. 467 |
| M117T535   | 117. 053534  | 535. 488 | 18113513. 71 |
| M117T730   | 117. 0537076 | 730. 264 | 3945203. 695 |
| M117T453   | 117. 0537148 | 453. 126 | 3646703. 161 |
| M117T665_2 | 117. 0537392 | 664. 565 | 4424329. 071 |
| M117T103   | 117. 054049  | 102. 948 | 5678220. 975 |
| M117T688   | 117. 0537365 | 688. 189 | 3954925. 111 |
| M117T234   | 117. 0537272 | 233. 519 | 7448811. 477 |
| M117T258   | 117. 0535855 | 258. 208 | 4381238. 198 |
| M117T396   | 117. 0537272 | 396. 023 | 3848468. 446 |
| M117T131   | 117. 0539068 | 131. 207 | 19427104. 78 |
| M117T214   | 117. 0535994 | 213. 897 | 4670358. 533 |
| M117T404_2 | 117. 053715  | 403. 698 | 4550524. 621 |
| M117T696   | 117. 0537354 | 695. 893 | 10306650. 28 |
| M117T376   | 117. 0535374 | 376. 15  | 7055915. 52  |
| M117T425_2 | 117. 0535233 | 425. 439 | 4911261. 424 |
| M117T591   | 117. 0537108 | 590. 717 | 3798391. 945 |
| M117T308   | 117. 0535612 | 307. 616 | 8342311. 324 |
| M117T574   | 117. 0537089 | 573. 704 | 7085162. 823 |
| M117T475_2 | 117. 0537132 | 474. 888 | 6982325. 386 |
| M117T340   | 117. 0537454 | 339. 772 | 14262273. 68 |
| M117T160   | 117. 0536203 | 159. 635 | 10932497. 42 |
| M117T796   | 117. 0537417 | 796. 202 | 2955384. 369 |
| M117T146_1 | 117. 0535883 | 146. 08  | 34626936. 31 |
| M117T276   | 117. 0535669 | 275. 643 | 3926690. 76  |
| M117T501   | 117. 0535865 | 501. 318 | 7938567. 904 |
| M117T286   | 117. 0536109 | 286. 433 | 10274100. 82 |
| M117T677   | 117. 0537452 | 676. 878 | 4806924. 001 |
| M117T385   | 117. 0537225 | 385. 225 | 5587196. 582 |
| M117T359   | 117. 0537224 | 359. 297 | 5497725. 658 |
| M117T439   | 117. 0534844 | 439. 27  | 8457367. 693 |

|            |              |           |              |
|------------|--------------|-----------|--------------|
| M117T127   | 117. 073427  | 126. 755  | 1188436. 076 |
| M117T146_2 | 117. 0733984 | 146. 08   | 1850522. 004 |
| M117T108   | 117. 0733926 | 108. 082  | 2604562. 145 |
| M118T50    | 117. 9265481 | 49. 6825  | 153939. 2531 |
| M118T808   | 117. 9276159 | 808. 251  | 4179980. 106 |
| M118T817   | 117. 9276078 | 817. 214  | 3366704. 663 |
| M118T65    | 117. 9265712 | 65. 0166  | 620035. 947  |
| M118T33    | 117. 9270027 | 32. 8715  | 2259256. 562 |
| M118T778   | 117. 9278125 | 777. 92   | 2732430. 575 |
| M118T835   | 117. 9269866 | 835. 329  | 6644563. 588 |
| M118T79    | 118. 0209167 | 79. 4105  | 24130696. 21 |
| M118T63_1  | 118. 0278815 | 62. 7487  | 1541275. 661 |
| M118T37    | 118. 0281969 | 37. 4486  | 1171117. 122 |
| M118T566   | 118. 0282863 | 566. 042  | 2450638. 439 |
| M118T258   | 118. 0282209 | 258. 208  | 1050122. 168 |
| M118T591   | 118. 0282844 | 590. 717  | 1225544. 209 |
| M118T47    | 118. 0281761 | 47. 4553  | 265381. 3885 |
| M118T54    | 118. 0395987 | 54. 4735  | 397845. 8577 |
| M118T71    | 118. 0396136 | 70. 607   | 536359. 0172 |
| M118T41    | 118. 0396642 | 41. 3907  | 1050640. 927 |
| M118T63_2  | 118. 0493506 | 62. 7487  | 249632. 7584 |
| M118T90    | 118. 0493102 | 89. 8937  | 135765083. 4 |
| M118T51    | 118. 04934   | 50. 60205 | 120614. 6651 |
| M119T50    | 118. 9166662 | 50. 0766  | 96318. 06061 |
| M119T36_1  | 118. 9165686 | 36. 0041  | 1086393. 346 |
| M119T835_1 | 118. 9253459 | 835. 329  | 1656445. 518 |
| M119T34    | 118. 9404676 | 34. 4117  | 348128. 1009 |
| M119T47    | 118. 9646342 | 47. 399   | 292489. 8677 |
| M119T62    | 118. 964678  | 62. 1587  | 1775862. 068 |
| M119T118   | 118. 96458   | 117. 954  | 10941478. 17 |
| M119T36_2  | 118. 9642432 | 36. 0041  | 2137781. 681 |
| M119T79    | 119. 0219562 | 79. 4105  | 3740648. 805 |
| M119T272   | 119. 0337968 | 271. 596  | 7607350. 323 |
| M119T266   | 119. 033219  | 265. 541  | 7908914. 03  |
| M119T681   | 119. 0331976 | 681. 406  | 11038660. 87 |
| M119T278   | 119. 0331952 | 278. 267  | 4015596. 499 |
| M119T539   | 119. 0337948 | 538. 619  | 11711992. 78 |
| M119T663   | 119. 0332223 | 663. 008  | 13138607. 93 |
| M119T166   | 119. 033816  | 165. 522  | 38941873. 6  |
| M119T306   | 119. 0332116 | 306. 164  | 16249736. 09 |
| M119T472   | 119. 0332134 | 471. 768  | 13615785. 72 |
| M119T770   | 119. 0331996 | 770. 235  | 21340515. 81 |
| M119T117   | 119. 0338979 | 116. 52   | 70750035. 6  |
| M119T688   | 119. 0338312 | 688. 189  | 12098204. 54 |
| M119T285   | 119. 033823  | 285. 167  | 15377238. 15 |
| M119T436   | 119. 033814  | 436. 18   | 39065891. 85 |
| M119T147   | 119. 0337927 | 147. 455  | 28633925. 93 |
| M119T755   | 119. 0331998 | 754. 814  | 20024420. 8  |
| M119T221   | 119. 0332297 | 221. 453  | 24287654. 39 |
| M119T598   | 119. 0331897 | 598. 341  | 13413883. 82 |
| M119T609   | 119. 0338087 | 609. 19   | 17675385. 53 |
| M119T464   | 119. 0337939 | 464. 011  | 15221682. 33 |
| M119T655   | 119. 0331941 | 655. 321  | 12602513. 55 |
| M119T500   | 119. 0338225 | 499. 759  | 12076947. 12 |

|            |              |          |              |
|------------|--------------|----------|--------------|
| M119T826   | 119. 033195  | 826. 333 | 12628736. 81 |
| M119T188   | 119. 0331959 | 188. 174 | 21829239. 33 |
| M119T560   | 119. 0338388 | 560. 119 | 13665843. 41 |
| M119T206   | 119. 033193  | 206. 399 | 26796542. 1  |
| M119T93    | 119. 0338449 | 92. 9618 | 641979603. 7 |
| M119T344   | 119. 0337905 | 344. 233 | 22077839. 44 |
| M119T245   | 119. 0337974 | 244. 891 | 11167602. 64 |
| M119T701   | 119. 0332603 | 701. 149 | 11247370. 24 |
| M119T255   | 119. 0338048 | 255. 113 | 19481969. 26 |
| M119T321   | 119. 0338072 | 321. 312 | 20577174. 37 |
| M119T508   | 119. 0338046 | 507. 55  | 11597745. 6  |
| M119T332   | 119. 0338088 | 332. 105 | 14569806. 74 |
| M119T674   | 119. 0331969 | 673. 771 | 9964148. 317 |
| M119T175   | 119. 033179  | 174. 576 | 27204618. 76 |
| M119T518   | 119. 0338019 | 518. 474 | 14802602. 24 |
| M119T634   | 119. 0332021 | 633. 832 | 34428862. 37 |
| M119T718   | 119. 0332292 | 717. 942 | 25156802. 58 |
| M119T381   | 119. 0338228 | 380. 608 | 21947938. 74 |
| M119T489   | 119. 0338189 | 488. 885 | 18113213. 24 |
| M119T799   | 119. 0331909 | 799. 306 | 11630929. 34 |
| M119T235   | 119. 0331869 | 234. 972 | 19407361. 16 |
| M119T394   | 119. 0338792 | 394. 467 | 13560802. 72 |
| M119T575   | 119. 0338064 | 575. 222 | 29908932. 08 |
| M119T359   | 119. 033798  | 359. 297 | 14316418. 19 |
| M119T296   | 119. 0332744 | 295. 704 | 12056568. 61 |
| M119T733   | 119. 0337985 | 733. 352 | 16940353. 6  |
| M119T835_2 | 119. 0331723 | 835. 329 | 9213925. 976 |
| M119T814   | 119. 0331919 | 814. 118 | 21350616. 75 |
| M119T390   | 119. 0485889 | 389. 839 | 1310244. 838 |
| M119T498   | 119. 0487281 | 498. 202 | 478174. 2359 |
| M119T416   | 119. 0487409 | 416. 128 | 791587. 4777 |
| M119T340   | 119. 0485642 | 339. 772 | 8964961. 966 |
| M120T787   | 119. 9453987 | 787. 078 | 9751205. 922 |
| M120T811   | 119. 9454004 | 811. 292 | 27105297. 19 |
| M120T694   | 119. 9452681 | 694. 341 | 10646172. 8  |
| M120T778   | 119. 9453304 | 777. 92  | 14449022. 67 |
| M120T740   | 119. 9454167 | 739. 509 | 11519902. 99 |
| M120T713   | 119. 9454392 | 713. 292 | 11253753. 1  |
| M120T762   | 119. 9453905 | 762. 482 | 8355558. 177 |
| M120T753   | 119. 9453966 | 753. 315 | 10539956. 67 |
| M120T93    | 120. 0367084 | 92. 9618 | 16838354. 15 |
| M120T315   | 120. 0438798 | 315. 162 | 609867. 6071 |
| M120T175   | 120. 0438568 | 174. 576 | 1101962. 103 |
| M120T258   | 120. 0438764 | 258. 208 | 8840666. 241 |
| M120T509   | 120. 0439194 | 509. 11  | 346498. 0882 |
| M120T340   | 120. 052002  | 339. 772 | 600070. 4763 |
| M121T86    | 120. 9263797 | 86. 3396 | 6939866. 246 |
| M121T146   | 120. 9772825 | 146. 08  | 3978069. 14  |
| M121T503_1 | 121. 0272519 | 502. 873 | 461594062. 6 |
| M121T535   | 121. 0283278 | 535. 488 | 28390335. 68 |
| M121T710   | 121. 02826   | 710. 246 | 15900195. 94 |
| M121T761   | 121. 0283052 | 760. 976 | 14451137. 49 |
| M121T680   | 121. 0283139 | 679. 873 | 18609299. 95 |
| M121T609   | 121. 0283095 | 609. 19  | 34248922. 99 |



|            |              |          |              |
|------------|--------------|----------|--------------|
| M121T746   | 121. 0282764 | 745. 747 | 13224847. 53 |
| M121T655   | 121. 028267  | 655. 321 | 17942906. 55 |
| M121T792   | 121. 0282854 | 791. 678 | 14534777. 21 |
| M121T718   | 121. 0283374 | 717. 942 | 11560503. 39 |
| M121T801   | 121. 0283259 | 800. 683 | 16158729. 99 |
| M121T629   | 121. 0282664 | 629. 272 | 11418530. 29 |
| M121T753   | 121. 0282874 | 753. 315 | 9196666. 532 |
| M121T698   | 121. 0283758 | 698. 034 | 15576535. 78 |
| M121T775   | 121. 0282484 | 774. 892 | 16362489. 18 |
| M121T575   | 121. 0283447 | 575. 222 | 31755630. 6  |
| M121T554   | 121. 0283226 | 554. 027 | 29454758. 64 |
| M121T733   | 121. 0283593 | 733. 352 | 25173397. 11 |
| M121T835   | 121. 0282819 | 835. 329 | 21781626. 07 |
| M121T814   | 121. 0283113 | 814. 118 | 18132791. 22 |
| M121T638   | 121. 0282678 | 638. 484 | 18225556. 08 |
| M121T58    | 121. 0428558 | 58. 1047 | 283462. 19   |
| M121T65    | 121. 0428982 | 65. 0166 | 329152. 4795 |
| M121T271   | 121. 0392844 | 270. 519 | 83399. 46894 |
| M121T45    | 121. 0428967 | 44. 9143 | 631753. 7938 |
| M121T258   | 121. 0474492 | 258. 208 | 483263. 8117 |
| M121T427   | 121. 0644339 | 426. 913 | 528810. 686  |
| M121T503_2 | 121. 0697328 | 502. 873 | 2380889. 991 |
| M122T694   | 121. 9424629 | 694. 341 | 3273985. 862 |
| M122T379_1 | 121. 9793042 | 379. 066 | 1180662. 056 |
| M122T270   | 122. 0229678 | 269. 798 | 14574646. 88 |
| M122T266   | 122. 0229567 | 265. 541 | 17782827. 53 |
| M122T276   | 122. 0229626 | 275. 643 | 14655977. 28 |
| M122T411   | 122. 0238702 | 411. 444 | 46041753. 44 |
| M122T600   | 122. 0228311 | 599. 904 | 18251550. 73 |
| M122T456   | 122. 022967  | 456. 2   | 26596683     |
| M122T557   | 122. 0228328 | 557. 078 | 23890891. 47 |
| M122T813   | 122. 0227936 | 812. 68  | 23335575. 67 |
| M122T203   | 122. 0229659 | 203. 346 | 26966136. 25 |
| M122T127   | 122. 0229563 | 126. 755 | 48148295. 66 |
| M122T588   | 122. 0228018 | 587. 595 | 28870682. 8  |
| M122T665   | 122. 022975  | 664. 565 | 62100733. 77 |
| M122T232   | 122. 0229648 | 231. 973 | 51956283. 08 |
| M122T793   | 122. 0229821 | 793. 233 | 17177926. 77 |
| M122T350   | 122. 0229785 | 350. 108 | 24338637. 67 |
| M122T710   | 122. 0238076 | 710. 246 | 29092884. 13 |
| M122T609   | 122. 0228438 | 609. 19  | 28850830. 91 |
| M122T766   | 122. 0238419 | 765. 588 | 15755102. 95 |
| M122T188   | 122. 0229663 | 188. 174 | 26966457. 07 |
| M122T258   | 122. 0229628 | 258. 208 | 24626702     |
| M122T506   | 122. 0229717 | 505. 99  | 40641796. 74 |
| M122T688   | 122. 0228364 | 688. 189 | 22181623. 95 |
| M122T379_2 | 122. 0227699 | 379. 066 | 170679231. 4 |
| M122T246   | 122. 0229615 | 246. 474 | 22398651. 5  |
| M122T534   | 122. 0228047 | 533. 931 | 41391117. 36 |
| M122T736   | 122. 0229739 | 736. 458 | 46775027. 24 |
| M122T396   | 122. 0229768 | 396. 023 | 55808228. 21 |
| M122T756   | 122. 02297   | 756. 343 | 18338133. 8  |
| M122T444   | 122. 023871  | 443. 961 | 42308780. 89 |
| M122T214   | 122. 0229584 | 213. 897 | 35728544. 47 |

|            |              |          |              |
|------------|--------------|----------|--------------|
| M122T718   | 122. 0238656 | 717. 942 | 13836192. 32 |
| M122T285   | 122. 022954  | 285. 167 | 43528977. 09 |
| M122T577   | 122. 0229673 | 576. 787 | 47108437. 79 |
| M122T518   | 122. 0228115 | 518. 474 | 35024009. 81 |
| M122T175   | 122. 0229424 | 174. 576 | 30966874. 22 |
| M122T425   | 122. 0229544 | 425. 439 | 36500197. 24 |
| M122T343   | 122. 0237896 | 342. 819 | 32621348. 79 |
| M122T548   | 122. 0228556 | 547. 805 | 22992673. 12 |
| M122T146   | 122. 0229456 | 146. 08  | 79350353. 07 |
| M122T698   | 122. 02285   | 698. 034 | 22005800. 5  |
| M122T773   | 122. 0239017 | 773. 333 | 12797802. 54 |
| M122T825   | 122. 0227651 | 824. 864 | 13197021. 74 |
| M122T490   | 122. 0239899 | 490. 434 | 76250327. 28 |
| M122T324   | 122. 022961  | 324. 413 | 35354695. 41 |
| M122T312   | 122. 0229772 | 312. 058 | 36499727. 27 |
| M122T835   | 122. 0227911 | 835. 329 | 11243731. 54 |
| M122T782   | 122. 0229489 | 782. 5   | 16365795. 26 |
| M122T160   | 122. 0229865 | 159. 635 | 42303404. 07 |
| M122T638   | 122. 0228186 | 638. 484 | 64180759. 55 |
| M122T41    | 122. 0311601 | 41. 3907 | 2601567. 502 |
| M122T63    | 122. 0311563 | 62. 7487 | 2468456. 293 |
| M122T49    | 122. 0311698 | 48. 7629 | 337511. 8727 |
| M122T119   | 122. 0595379 | 119. 413 | 571758. 0539 |
| M122T262   | 122. 0596189 | 262. 302 | 341448. 7749 |
| M122T379_3 | 122. 06729   | 379. 066 | 955105. 177  |
| M123T415   | 123. 0079357 | 414. 571 | 3971851. 411 |
| M123T542   | 123. 007841  | 541. 673 | 5223019. 061 |
| M123T497   | 123. 0078493 | 496. 646 | 2441484. 38  |
| M123T548   | 123. 0078473 | 547. 805 | 2264784. 63  |
| M123T749   | 123. 0078637 | 748. 742 | 3652909. 379 |
| M123T408   | 123. 0079327 | 408. 368 | 2679814. 911 |
| M123T390   | 123. 0078534 | 389. 839 | 3752338. 382 |
| M123T327   | 123. 007895  | 327. 449 | 5709929. 942 |
| M123T557   | 123. 0078127 | 557. 078 | 3651130. 117 |
| M123T315   | 123. 0078452 | 315. 162 | 5744707. 32  |
| M123T727   | 123. 0078454 | 727. 22  | 2886981. 749 |
| M123T346   | 123. 0079069 | 345. 761 | 4980928. 281 |
| M123T665   | 123. 0078606 | 664. 565 | 3504800. 234 |
| M123T795   | 123. 0078154 | 794. 753 | 2909545. 085 |
| M123T226   | 123. 0078827 | 225. 965 | 4876314. 079 |
| M123T202_1 | 123. 0078264 | 201. 897 | 5788344. 456 |
| M123T520   | 123. 007846  | 519. 998 | 4369932. 514 |
| M123T184   | 123. 0078312 | 183. 708 | 10522203. 54 |
| M123T458   | 123. 0078494 | 457. 763 | 2818329. 04  |
| M123T598   | 123. 0078419 | 598. 341 | 4747080. 52  |
| M123T615   | 123. 0078458 | 615. 38  | 5685324. 439 |
| M123T337   | 123. 0078978 | 336. 681 | 3247541. 978 |
| M123T823   | 123. 0078274 | 823. 375 | 10449302. 34 |
| M123T506   | 123. 007834  | 505. 99  | 4619832. 641 |
| M123T98    | 123. 0070386 | 97. 682  | 9046997. 475 |
| M123T688   | 123. 0078716 | 688. 189 | 3898682. 32  |
| M123T577_1 | 123. 0078742 | 576. 787 | 3748576. 318 |
| M123T466   | 123. 0078602 | 465. 575 | 3350383. 526 |
| M123T365   | 123. 0078657 | 365. 475 | 5724231. 254 |

|            |              |           |              |
|------------|--------------|-----------|--------------|
| M123T262   | 123. 0078407 | 262. 302  | 2989952. 869 |
| M123T569   | 123. 0078467 | 569. 091  | 3205994. 508 |
| M123T586   | 123. 0078324 | 586. 044  | 4029654. 299 |
| M123T217   | 123. 0072101 | 216. 95   | 10206517. 74 |
| M123T194   | 123. 0078439 | 194. 243  | 4995541. 591 |
| M123T637   | 123. 0078414 | 636. 925  | 9757624. 353 |
| M123T109   | 123. 0072752 | 109. 475  | 9310596. 64  |
| M123T246   | 123. 0078387 | 246. 013  | 10458593. 09 |
| M123T489   | 123. 0079061 | 488. 885  | 4501356. 615 |
| M123T672   | 123. 0078646 | 672. 229  | 3139037. 746 |
| M123T376   | 123. 0078603 | 376. 15   | 3686037. 436 |
| M123T155   | 123. 0072051 | 155. 033  | 17910403. 24 |
| M123T779   | 123. 0078527 | 779. 407  | 3207124. 033 |
| M123T446   | 123. 0079043 | 445. 522  | 5301699. 391 |
| M123T294   | 123. 0078703 | 294. 152  | 6289828. 288 |
| M123T475   | 123. 0078732 | 474. 888  | 4053660. 626 |
| M123T735   | 123. 0078526 | 734. 901  | 4474747. 503 |
| M123T276   | 123. 0078381 | 275. 643  | 4605770. 715 |
| M123T698   | 123. 0078846 | 698. 034  | 5459112. 987 |
| M123T713   | 123. 0078632 | 713. 292  | 3915882. 332 |
| M123T762   | 123. 0078562 | 762. 482  | 5128813. 166 |
| M123T56    | 123. 0185821 | 56. 0747  | 265477. 7339 |
| M123T43    | 123. 0186392 | 43. 4241  | 1361360. 068 |
| M123T68    | 123. 0185819 | 67. 6441  | 510511. 3697 |
| M123T379   | 123. 0265944 | 379. 066  | 9629551. 748 |
| M123T146   | 123. 0265846 | 146. 08   | 4629737. 462 |
| M123T147   | 123. 0435578 | 147. 455  | 1070436. 582 |
| M123T202_2 | 123. 04364   | 201. 897  | 2435922. 66  |
| M123T388   | 123. 043589  | 388. 326  | 2582135. 848 |
| M123T551   | 123. 0437093 | 550. 932  | 4729587. 976 |
| M123T372   | 123. 0435979 | 371. 633  | 1164728. 441 |
| M123T577_2 | 123. 0436187 | 576. 787  | 3420431. 79  |
| M123T299   | 123. 0436311 | 298. 619  | 1447884. 461 |
| M123T296   | 123. 0547817 | 295. 704  | 1720295. 88  |
| M124T232_1 | 123. 9937872 | 231. 973  | 667053. 966  |
| M124T385_1 | 123. 9937418 | 385. 225  | 549566. 3553 |
| M124T50    | 124. 0024028 | 50. 07655 | 312646. 4782 |
| M124T37    | 124. 0024096 | 37. 4486  | 1627392. 011 |
| M124T66    | 124. 0024096 | 66. 2043  | 1157507. 036 |
| M124T163   | 124. 0105445 | 162. 615  | 631643. 2106 |
| M124T154   | 124. 0105144 | 153. 601  | 988096. 875  |
| M124T215   | 124. 0151786 | 215. 4    | 396951. 8704 |
| M124T379   | 124. 027398  | 379. 066  | 427603. 1442 |
| M124T277   | 124. 0383283 | 276. 5305 | 13885135. 73 |
| M124T623   | 124. 03827   | 623. 098  | 125781825. 1 |
| M124T455   | 124. 0382622 | 454. 645  | 27223127. 47 |
| M124T435   | 124. 0395626 | 434. 617  | 33875913. 02 |
| M124T413   | 124. 0383447 | 413. 006  | 38837520. 11 |
| M124T539   | 124. 0384241 | 538. 619  | 27759798. 04 |
| M124T522   | 124. 038341  | 521. 5    | 43264332. 71 |
| M124T346   | 124. 0383866 | 345. 761  | 57174147. 05 |
| M124T559   | 124. 0383701 | 558. 574  | 22425356. 86 |
| M124T834   | 124. 0383444 | 833. 866  | 14560452. 84 |
| M124T687   | 124. 0382872 | 687. 214  | 24958731. 51 |

|            |              |          |              |
|------------|--------------|----------|--------------|
| M124T588   | 124. 0382588 | 587. 595 | 26499083. 86 |
| M124T660   | 124. 0382609 | 659. 904 | 48872520. 31 |
| M124T266   | 124. 0383211 | 265. 541 | 19688803. 56 |
| M124T399   | 124. 0382543 | 399. 086 | 68294806. 46 |
| M124T337   | 124. 0383538 | 336. 681 | 106940161. 8 |
| M124T823   | 124. 0383461 | 823. 375 | 13738338. 89 |
| M124T710   | 124. 0383698 | 710. 246 | 29403647. 3  |
| M124T234   | 124. 0387481 | 233. 519 | 140976824. 1 |
| M124T447   | 124. 0395577 | 446. 967 | 32514445. 2  |
| M124T805   | 124. 0384251 | 805. 145 | 19626701. 45 |
| M124T577   | 124. 0383709 | 576. 787 | 28045800. 37 |
| M124T361   | 124. 0387435 | 360. 831 | 46072862. 78 |
| M124T476   | 124. 0382667 | 476. 451 | 39562261. 28 |
| M124T569   | 124. 0383707 | 569. 091 | 23182692. 26 |
| M124T792   | 124. 0383468 | 791. 678 | 21002575. 46 |
| M124T697   | 124. 0384174 | 697. 061 | 25380310. 99 |
| M124T425   | 124. 038256  | 425. 439 | 39179410. 54 |
| M124T508   | 124. 0384241 | 507. 55  | 34338999. 16 |
| M124T256   | 124. 03826   | 255. 831 | 36750313. 86 |
| M124T549   | 124. 0383864 | 549. 371 | 27796184. 31 |
| M124T738   | 124. 0383884 | 737. 955 | 62240224. 07 |
| M124T467   | 124. 0382553 | 467. 127 | 30685508. 6  |
| M124T286   | 124. 038407  | 286. 433 | 35610474. 69 |
| M124T385_2 | 124. 0387711 | 385. 225 | 104518382. 7 |
| M124T490   | 124. 0382931 | 490. 434 | 32026056. 94 |
| M124T312_1 | 124. 0380841 | 312. 058 | 316581402. 9 |
| M124T773   | 124. 0383957 | 773. 333 | 20952778. 32 |
| M124T782   | 124. 0382646 | 782. 5   | 14161704. 78 |
| M124T762   | 124. 0383375 | 762. 482 | 19888754. 57 |
| M124T814   | 124. 038395  | 814. 118 | 14856215. 56 |
| M124T232_2 | 124. 0838218 | 231. 973 | 547007. 0081 |
| M124T385_3 | 124. 0830266 | 385. 225 | 516364. 9632 |
| M124T312_2 | 124. 083145  | 312. 058 | 2179071. 591 |
| M125T166   | 124. 9824112 | 165. 522 | 6657350. 887 |
| M125T31    | 124. 9865754 | 31. 4228 | 608025. 7867 |
| M125T314   | 124. 9824361 | 313. 612 | 1712012. 756 |
| M125T119   | 125. 0228586 | 119. 413 | 25948487. 28 |
| M125T147   | 125. 0228546 | 147. 455 | 11741346. 13 |
| M125T449   | 125. 0221687 | 448. 527 | 9369325. 48  |
| M125T197   | 125. 0228231 | 197. 335 | 8965795. 309 |
| M125T317   | 125. 0238636 | 316. 709 | 57190319. 05 |
| M125T215   | 125. 0237182 | 215. 4   | 15282251. 57 |
| M125T95    | 125. 0228402 | 95. 2383 | 138850614. 5 |
| M125T282   | 125. 0339958 | 281. 942 | 32730661. 81 |
| M125T232   | 125. 0421827 | 231. 973 | 7886812. 895 |
| M125T385   | 125. 0421866 | 385. 225 | 6112861. 398 |
| M125T312   | 125. 0429393 | 312. 058 | 18814875. 18 |
| M125T300   | 125. 0591749 | 300. 176 | 827061. 1578 |
| M125T220   | 125. 0592624 | 219. 979 | 586536. 8996 |
| M125T370   | 125. 0956653 | 370. 115 | 2379866. 075 |
| M125T504   | 125. 0955852 | 504. 432 | 657975. 4026 |
| M126T828   | 125. 8977189 | 827. 821 | 1151760      |
| M126T795   | 125. 8975595 | 794. 753 | 1691573. 849 |
| M126T805   | 125. 8976979 | 805. 145 | 1322572. 944 |

|           |              |          |              |
|-----------|--------------|----------|--------------|
| M126T816  | 125. 897751  | 815. 664 | 1258802. 489 |
| M126T778  | 125. 8976515 | 777. 92  | 4136357. 114 |
| M126T738  | 125. 8975665 | 737. 955 | 2960180. 08  |
| M126T835  | 125. 8977308 | 835. 329 | 567865. 005  |
| M126T365  | 125. 9942612 | 365. 475 | 3793552. 962 |
| M126T255  | 126. 0003894 | 254. 651 | 866948. 44   |
| M126T43_1 | 126. 0180472 | 43. 3505 | 235556. 005  |
| M126T49_1 | 126. 0179903 | 48. 9296 | 401904. 0348 |
| M126T60   | 126. 0180393 | 59. 8865 | 2609196. 358 |
| M126T96   | 126. 0180653 | 96. 4922 | 3869151. 022 |
| M126T33_1 | 126. 0180502 | 32. 8715 | 530220. 0822 |
| M126T267  | 126. 0269937 | 266. 709 | 174254. 6335 |
| M126T271  | 126. 026882  | 270. 88  | 142998. 0023 |
| M126T261  | 126. 0268928 | 261. 138 | 334147. 0878 |
| M126T246  | 126. 0270684 | 246. 013 | 162255. 5946 |
| M126T252  | 126. 0269176 | 251. 727 | 257256. 6994 |
| M126T182  | 126. 0268627 | 182. 156 | 765195. 4592 |
| M126T302  | 126. 0269962 | 301. 725 | 327077. 1787 |
| M126T317  | 126. 0265787 | 316. 709 | 3330988. 073 |
| M126T278  | 126. 0268876 | 278. 267 | 104336. 7347 |
| M126T215  | 126. 0268821 | 215. 4   | 764250. 972  |
| M126T200  | 126. 0269146 | 200. 362 | 327900. 0464 |
| M126T235  | 126. 0268843 | 234. 972 | 559622. 9077 |
| M126T286  | 126. 0268701 | 286. 433 | 447284. 7793 |
| M126T191  | 126. 0268831 | 191. 259 | 436802. 4656 |
| M126T65_1 | 126. 0375472 | 65. 0166 | 1233120. 55  |
| M126T43_2 | 126. 0295252 | 42. 8986 | 2979970. 132 |
| M126T283  | 126. 0374291 | 282. 659 | 1025957. 673 |
| M126T49_2 | 126. 0545645 | 49. 0256 | 60722. 59379 |
| M126T65_2 | 126. 0546493 | 65. 4825 | 342937. 6139 |
| M126T33_2 | 126. 0545924 | 32. 8715 | 190002. 2806 |
| M127T661  | 126. 9034971 | 661. 453 | 18068276. 28 |
| M127T522  | 126. 9035653 | 521. 5   | 3630975. 143 |
| M127T789  | 126. 9030528 | 788. 604 | 14099573. 32 |
| M127T724  | 126. 9034972 | 724. 158 | 10878640. 12 |
| M127T766  | 126. 9031425 | 765. 588 | 16583762. 38 |
| M127T732  | 126. 9038985 | 731. 793 | 7219480. 595 |
| M127T740  | 126. 9031499 | 739. 509 | 11096028. 4  |
| M127T811  | 126. 903225  | 811. 292 | 24839014. 8  |
| M127T675  | 126. 9034724 | 675. 322 | 12697638. 46 |
| M127T697  | 126. 9034755 | 697. 061 | 18270304. 61 |
| M127T778  | 126. 9034986 | 777. 92  | 23353211. 28 |
| M127T592  | 126. 9038257 | 592. 284 | 74112514. 1  |
| M127T802  | 126. 9032089 | 802. 116 | 19696048. 05 |
| M127T713  | 126. 9035007 | 713. 292 | 13490511. 25 |
| M127T835  | 126. 9030569 | 835. 329 | 20196754. 27 |
| M127T753  | 126. 9034929 | 753. 315 | 18697969. 55 |
| M127T133  | 126. 9344657 | 132. 707 | 3514948. 394 |
| M127T106  | 127. 0021046 | 105. 537 | 19422655. 84 |
| M127T94   | 127. 002224  | 94. 1615 | 194747691. 3 |
| M127T326  | 127. 0016207 | 325. 901 | 3200475. 664 |
| M127T173  | 127. 0022244 | 173. 092 | 3946131. 188 |
| M127T231  | 127. 0210157 | 230. 507 | 166890. 4433 |
| M127T227  | 127. 0382887 | 227. 421 | 15049075. 46 |

|            |              |           |              |
|------------|--------------|-----------|--------------|
| M127T104   | 127. 0386123 | 104. 493  | 6998627. 678 |
| M127T146   | 127. 0386299 | 146. 08   | 13500818. 65 |
| M127T421   | 127. 075007  | 420. 799  | 894837. 1321 |
| M127T404   | 127. 0749816 | 403. 698  | 1426643. 42  |
| M127T296   | 127. 0749222 | 295. 704  | 1263744. 888 |
| M128T91_1  | 127. 9864568 | 90. 9026  | 33653686. 25 |
| M128T91_2  | 128. 0327208 | 90. 9026  | 6114417256   |
| M128T81    | 128. 0338644 | 80. 6174  | 23895685. 46 |
| M128T413   | 128. 0337762 | 413. 006  | 12527925. 91 |
| M128T311   | 128. 0336829 | 310. 626  | 10607238. 81 |
| M128T600   | 128. 0337533 | 599. 904  | 9622036. 305 |
| M128T622   | 128. 0336361 | 621. 547  | 7660068. 533 |
| M128T828   | 128. 0337311 | 827. 821  | 19638450. 58 |
| M128T335   | 128. 033755  | 335. 153  | 10054626. 4  |
| M128T346   | 128. 0337399 | 345. 761  | 13800124. 94 |
| M128T535   | 128. 0337825 | 535. 488  | 18539768. 81 |
| M128T398   | 128. 0337738 | 397. 585  | 13691641. 4  |
| M128T793   | 128. 0337049 | 793. 233  | 9070292. 885 |
| M128T660   | 128. 0337308 | 659. 904  | 17374641. 32 |
| M128T172   | 128. 0334584 | 171. 546  | 50461550. 55 |
| M128T193   | 128. 0340045 | 192. 769  | 39406673. 33 |
| M128T506   | 128. 0337362 | 505. 99   | 25947806. 69 |
| M128T297   | 128. 0337733 | 297. 149  | 17463139. 86 |
| M128T321   | 128. 0336954 | 321. 312  | 12332457. 72 |
| M128T476   | 128. 0337047 | 476. 451  | 32833161. 14 |
| M128T637   | 128. 0337127 | 636. 925  | 9254718. 79  |
| M128T271   | 128. 0333227 | 270. 519  | 29519961. 78 |
| M128T611   | 128. 0336947 | 610. 742  | 12098087. 04 |
| M128T577   | 128. 0336905 | 576. 787  | 18174204. 32 |
| M128T244   | 128. 0333203 | 243. 976  | 55744794. 14 |
| M128T697   | 128. 0337579 | 697. 061  | 23550644. 55 |
| M128T425   | 128. 033776  | 425. 439  | 11051727. 51 |
| M128T758   | 128. 0336652 | 757. 881  | 13618582. 27 |
| M128T718   | 128. 0336945 | 717. 942  | 8767095. 922 |
| M128T382   | 128. 0337614 | 382. 171  | 17010424. 91 |
| M128T362   | 128. 0337177 | 362. 384  | 13301019. 4  |
| M128T784   | 128. 0336943 | 784. 051  | 10034599. 35 |
| M128T735   | 128. 0336952 | 734. 901  | 17197993. 01 |
| M128T773   | 128. 0333101 | 773. 333  | 8431247. 416 |
| M128T450   | 128. 0337541 | 450. 052  | 8085210. 914 |
| M128T439   | 128. 0337148 | 439. 27   | 12218981. 39 |
| M128T44    | 128. 0702894 | 43. 65385 | 166823. 2766 |
| M128T50    | 128. 0702696 | 50. 07655 | 352567. 2354 |
| M128T107   | 128. 0701029 | 106. 648  | 5019150. 199 |
| M128T33    | 128. 0702868 | 32. 8715  | 1575303. 589 |
| M128T131   | 128. 070091  | 131. 207  | 4006922. 766 |
| M128T64    | 128. 0702975 | 64. 0412  | 1053386. 871 |
| M129T87_1  | 128. 9103997 | 87. 426   | 4539200. 551 |
| M129T54    | 128. 9580643 | 53. 948   | 767827. 4544 |
| M129T68    | 128. 9581223 | 67. 6441  | 2717157. 92  |
| M129T87_2  | 128. 9580135 | 87. 426   | 684057846. 1 |
| M129T106_1 | 128. 9699123 | 105. 537  | 757861. 0002 |
| M129T112_1 | 128. 9698436 | 112. 287  | 1672086. 18  |
| M129T252   | 129. 0174234 | 251. 727  | 10799035. 2  |

|            |             |         |             |
|------------|-------------|---------|-------------|
| M129T257_1 | 129.0174454 | 257.001 | 7099264.362 |
| M129T79    | 129.0182296 | 79.4105 | 364351306.3 |
| M129T106_2 | 129.0172489 | 105.537 | 259203520.3 |
| M129T187   | 129.0174731 | 186.689 | 22837733.99 |
| M129T435   | 129.0174634 | 434.617 | 9005295.789 |
| M129T456   | 129.0174446 | 456.2   | 11563167.82 |
| M129T245_1 | 129.0174726 | 244.891 | 10856459.21 |
| M129T828   | 129.0174248 | 827.821 | 14962674.06 |
| M129T349_1 | 129.0181776 | 348.668 | 32070440.29 |
| M129T203   | 129.0174115 | 203.346 | 23660398.03 |
| M129T112_2 | 129.0172529 | 112.287 | 317908880.4 |
| M129T147   | 129.0181596 | 147.455 | 40127934.43 |
| M129T724   | 129.0174518 | 724.158 | 9015689.878 |
| M129T790_1 | 129.0174177 | 790.161 | 8471909.612 |
| M129T266   | 129.0174748 | 265.541 | 6816109.195 |
| M129T288   | 129.0173065 | 287.981 | 47565578.78 |
| M129T98    | 129.0178063 | 97.682  | 130349754   |
| M129T688   | 129.0174698 | 688.189 | 11203602.82 |
| M129T577_1 | 129.0174508 | 576.787 | 8163046.933 |
| M129T746   | 129.0174441 | 745.747 | 9338559.324 |
| M129T666   | 129.0174438 | 666.058 | 7563018.78  |
| M129T569   | 129.0174484 | 569.091 | 8583712.506 |
| M129T586_1 | 129.0174948 | 586.044 | 10254778.59 |
| M129T517_1 | 129.0174487 | 516.908 | 8970634.234 |
| M129T732   | 129.0175    | 731.793 | 9806986.242 |
| M129T675   | 129.0174187 | 675.322 | 12122274.42 |
| M129T161   | 129.0181186 | 161.184 | 20451398.77 |
| M129T425_1 | 129.0174433 | 425.439 | 9150595.185 |
| M129T446   | 129.0181238 | 445.522 | 10417816.31 |
| M129T475   | 129.0174563 | 474.888 | 16794672.07 |
| M129T133   | 129.0181229 | 132.707 | 92520835.62 |
| M129T529   | 129.0174748 | 529.248 | 11403470.19 |
| M129T629   | 129.0174606 | 629.272 | 42117703.4  |
| M129T764_1 | 129.01748   | 764.034 | 17417255.96 |
| M129T804   | 129.0174709 | 803.615 | 15983669.74 |
| M129T231   | 129.0174347 | 230.507 | 17370833.8  |
| M129T552_1 | 129.0174335 | 552.493 | 11867129.3  |
| M129T394   | 129.018232  | 394.467 | 10811615.63 |
| M129T542   | 129.0174552 | 541.673 | 10052871.85 |
| M129T698   | 129.0174579 | 698.034 | 10432235.1  |
| M129T713   | 129.0174335 | 713.292 | 12493757.75 |
| M129T782   | 129.0174119 | 782.5   | 6712864.866 |
| M129T407   | 129.0175013 | 406.813 | 19021057.62 |
| M129T385   | 129.0181633 | 385.225 | 9133190.144 |
| M129T503   | 129.0174432 | 502.873 | 13240190.46 |
| M129T170   | 129.0174359 | 170.049 | 20820022.39 |
| M129T91    | 129.0372177 | 90.9026 | 326165467   |
| M129T497   | 129.0539692 | 496.646 | 12861602.57 |
| M129T166   | 129.0542611 | 165.522 | 11303559.27 |
| M129T99    | 129.0542326 | 98.9649 | 6874518.556 |
| M129T267   | 129.0539311 | 266.709 | 8820146.304 |
| M129T306   | 129.0538471 | 306.164 | 18977105.17 |
| M129T349_2 | 129.0539482 | 348.668 | 58832099.44 |
| M129T158   | 129.0542033 | 158.1   | 13241014.33 |

|            |              |          |              |
|------------|--------------|----------|--------------|
| M129T535   | 129. 0539618 | 535. 488 | 20476995. 63 |
| M129T226   | 129. 0542353 | 225. 965 | 12045692. 29 |
| M129T436   | 129. 0539889 | 436. 18  | 15294770. 81 |
| M129T755   | 129. 0539413 | 754. 814 | 11777784. 08 |
| M129T449   | 129. 0540479 | 448. 527 | 13200238. 75 |
| M129T660   | 129. 0539638 | 659. 904 | 21177631. 7  |
| M129T205   | 129. 0541359 | 204. 895 | 16907408. 6  |
| M129T609   | 129. 0539502 | 609. 19  | 24334710. 41 |
| M129T686   | 129. 0539429 | 686. 047 | 20982021. 03 |
| M129T781   | 129. 0539905 | 780. 958 | 7254192. 397 |
| M129T393   | 129. 0540148 | 392. 905 | 21716431. 49 |
| M129T337   | 129. 0539319 | 336. 681 | 36906101. 38 |
| M129T458   | 129. 0539667 | 457. 763 | 13309361. 07 |
| M129T790_2 | 129. 053961  | 790. 161 | 7678374. 426 |
| M129T826   | 129. 0539258 | 826. 333 | 14354114. 56 |
| M129T136   | 129. 0541644 | 135. 795 | 21904128. 63 |
| M129T470   | 129. 0539679 | 470. 253 | 18151416. 6  |
| M129T188   | 129. 0542107 | 188. 174 | 27646348. 94 |
| M129T568   | 129. 0539314 | 567. 543 | 10142375. 79 |
| M129T741   | 129. 0539306 | 741. 077 | 8317790. 106 |
| M129T245_2 | 129. 053924  | 244. 891 | 14788634. 99 |
| M129T517_2 | 129. 0539723 | 516. 908 | 12967530. 47 |
| M129T626   | 129. 053963  | 626. 183 | 17161814. 56 |
| M129T586_2 | 129. 0539984 | 586. 044 | 12014850. 38 |
| M129T720   | 129. 0539132 | 719. 505 | 20023952. 16 |
| M129T577_2 | 129. 0539409 | 576. 787 | 11177261. 77 |
| M129T149   | 129. 0542568 | 148. 981 | 19214954. 49 |
| M129T509   | 129. 0539382 | 509. 11  | 10986975. 63 |
| M129T278   | 129. 053938  | 278. 267 | 6830879. 259 |
| M129T425_2 | 129. 0539577 | 425. 439 | 11831084. 21 |
| M129T801   | 129. 0539503 | 800. 683 | 7508418. 773 |
| M129T215   | 129. 0542314 | 215. 4   | 18119423. 08 |
| M129T257_2 | 129. 0539323 | 257. 001 | 14694932. 75 |
| M129T381   | 129. 0539926 | 380. 608 | 12457904. 53 |
| M129T408   | 129. 0540425 | 408. 368 | 12279547. 54 |
| M129T362   | 129. 0540299 | 362. 384 | 18392120. 78 |
| M129T486   | 129. 0539626 | 485. 784 | 14703871. 67 |
| M129T700   | 129. 0540106 | 699. 592 | 13356580. 45 |
| M129T764_2 | 129. 0539356 | 764. 034 | 7824660. 737 |
| M129T286   | 129. 0539862 | 286. 433 | 11936720. 73 |
| M129T773   | 129. 0539131 | 773. 333 | 6185350. 28  |
| M129T552_2 | 129. 0539665 | 552. 493 | 19718574. 03 |
| M129T640   | 129. 053938  | 640. 057 | 16053298. 62 |
| M130T87    | 129. 961428  | 87. 426  | 13982228. 98 |
| M130T44    | 129. 9742912 | 44. 2604 | 717481. 25   |
| M130T50    | 129. 9742893 | 50. 3393 | 677994. 1618 |
| M130T55    | 129. 9742974 | 54. 7362 | 562126. 7741 |
| M130T61    | 129. 974289  | 60. 9725 | 801666. 3668 |
| M130T67    | 129. 9742879 | 67. 1831 | 711319. 3795 |
| M130T828   | 129. 9735738 | 827. 821 | 4481883. 758 |
| M130T709   | 129. 9735145 | 708. 697 | 2783399. 913 |
| M130T681   | 129. 9735839 | 681. 406 | 3483215. 883 |
| M130T810   | 129. 9736004 | 809. 797 | 3320345. 579 |
| M130T668   | 129. 9734713 | 667. 612 | 3119996. 149 |



|            |              |          |              |
|------------|--------------|----------|--------------|
| M130T790   | 129. 9736002 | 790. 161 | 2789783. 775 |
| M130T741   | 129. 9736059 | 741. 077 | 4073094. 606 |
| M130T33_1  | 129. 9743103 | 32. 8715 | 1237582. 919 |
| M130T720   | 129. 9736046 | 719. 505 | 2711041. 117 |
| M130T694   | 129. 9735952 | 694. 341 | 4485852. 61  |
| M130T801   | 129. 9735906 | 800. 683 | 3236297. 168 |
| M130T835   | 129. 973667  | 835. 329 | 1654180. 699 |
| M130T773   | 129. 9736059 | 773. 333 | 9414022. 826 |
| M130T49    | 130. 0212271 | 48. 7629 | 88771. 59407 |
| M130T60    | 130. 021205  | 59. 8865 | 172430. 0732 |
| M130T79    | 130. 0212881 | 79. 4105 | 21330678. 53 |
| M130T106   | 130. 0211952 | 105. 537 | 12209641. 29 |
| M130T112   | 130. 0212465 | 112. 287 | 15134429. 29 |
| M130T34    | 130. 0212043 | 34. 4117 | 89092. 44903 |
| M130T181   | 130. 0373165 | 180. 601 | 764312. 4394 |
| M130T91    | 130. 038255  | 90. 9026 | 34333665. 71 |
| M130T103   | 130. 0494384 | 102. 948 | 24169783. 67 |
| M130T335_1 | 130. 0577963 | 335. 153 | 2040371. 065 |
| M130T349   | 130. 0578061 | 348. 668 | 3066060. 204 |
| M130T62    | 130. 0575617 | 62. 1587 | 1455177. 94  |
| M130T43    | 130. 0575864 | 43. 4241 | 1023678. 759 |
| M130T90    | 130. 0494267 | 89. 8937 | 26854120. 71 |
| M130T277   | 130. 0864972 | 277. 42  | 15771239     |
| M130T283   | 130. 0865554 | 282. 659 | 16986533. 29 |
| M130T271   | 130. 0865272 | 270. 519 | 14259829. 52 |
| M130T264   | 130. 0865212 | 264. 434 | 20017971. 03 |
| M130T456   | 130. 0864925 | 456. 2   | 29479936. 26 |
| M130T522   | 130. 0864626 | 521. 5   | 32852771. 74 |
| M130T182   | 130. 0846756 | 182. 156 | 137140211. 6 |
| M130T306   | 130. 0864759 | 306. 164 | 29433655. 35 |
| M130T335_2 | 130. 0865512 | 335. 153 | 36022551. 62 |
| M130T789   | 130. 0849987 | 788. 604 | 67864493. 83 |
| M130T449   | 130. 0865905 | 448. 527 | 24507402. 33 |
| M130T436   | 130. 0866251 | 436. 18  | 31550177. 11 |
| M130T410   | 130. 0865807 | 409. 881 | 34895740. 94 |
| M130T373   | 130. 0865906 | 373. 196 | 26321688. 15 |
| M130T540   | 130. 0864837 | 540. 152 | 38924004. 52 |
| M130T609   | 130. 0864795 | 609. 19  | 101303991. 2 |
| M130T761   | 130. 0865392 | 760. 976 | 66791909. 51 |
| M130T350   | 130. 0865818 | 350. 108 | 22362127. 88 |
| M130T568   | 130. 0864691 | 567. 543 | 28889060. 04 |
| M130T483   | 130. 0865326 | 482. 656 | 76450011. 92 |
| M130T33_2  | 130. 0855765 | 32. 8715 | 26302449. 19 |
| M130T736   | 130. 0865206 | 736. 458 | 87318232. 36 |
| M130T361   | 130. 0865525 | 360. 831 | 33371451. 65 |
| M130T626   | 130. 0848986 | 626. 183 | 51261959. 26 |
| M130T217   | 130. 0859424 | 216. 95  | 73043620. 07 |
| M130T511   | 130. 0865342 | 510. 673 | 33435371. 22 |
| M130T246   | 130. 0864926 | 246. 013 | 30327201. 47 |
| M130T577   | 130. 0865369 | 576. 787 | 34895376. 05 |
| M130T256   | 130. 0864916 | 255. 831 | 22616086     |
| M130T318   | 130. 0864602 | 318. 232 | 30807637. 43 |
| M130T532   | 130. 0865245 | 532. 372 | 21096629. 82 |
| M130T424   | 130. 086491  | 423. 877 | 33979768. 59 |

|            |              |           |              |
|------------|--------------|-----------|--------------|
| M130T294   | 130. 0865885 | 294. 152  | 32780526. 99 |
| M130T382   | 130. 0865231 | 382. 171  | 23646156. 02 |
| M130T672   | 130. 0864816 | 672. 229  | 262493221. 4 |
| M130T552   | 130. 086466  | 552. 493  | 48589293. 81 |
| M130T169   | 130. 085215  | 168. 507  | 75066733. 25 |
| M130T829   | 130. 0850655 | 829. 321  | 126198145. 8 |
| M130T394   | 130. 0865502 | 394. 467  | 34204361. 91 |
| M130T775   | 130. 0864949 | 774. 892  | 54128739. 99 |
| M131T43    | 130. 9562387 | 43. 4241  | 53553. 38672 |
| M131T50    | 130. 9562092 | 50. 3393  | 64002. 35133 |
| M131T57    | 130. 9562139 | 56. 668   | 174961. 8149 |
| M131T61_1  | 130. 956226  | 61. 4369  | 177740. 2397 |
| M131T68_1  | 130. 9562293 | 67. 6441  | 107165. 7864 |
| M131T34    | 130. 9562549 | 34. 4117  | 335315. 4785 |
| M131T87_1  | 130. 9564233 | 87. 426   | 50487265. 86 |
| M131T140   | 130. 9642055 | 140. 209  | 936134. 1265 |
| M131T118   | 130. 964213  | 117. 954  | 2319985. 916 |
| M131T51    | 130. 9820474 | 50. 8649  | 1397039. 935 |
| M131T61_2  | 130. 9820524 | 60. 7882  | 1365931. 126 |
| M131T68_2  | 130. 9820812 | 67. 6441  | 3059054. 583 |
| M131T99    | 130. 9826658 | 98. 9649  | 15274724. 79 |
| M131T136_1 | 130. 9828454 | 135. 795  | 38694985. 8  |
| M131T164   | 130. 9830438 | 164. 077  | 28140577. 13 |
| M131T90    | 130. 9827073 | 89. 8937  | 29387810. 57 |
| M131T112   | 130. 983087  | 112. 287  | 47025667. 59 |
| M131T724   | 130. 9907183 | 724. 158  | 2317031. 716 |
| M131T713   | 130. 990754  | 713. 292  | 3121944. 942 |
| M131T537   | 131. 0325877 | 537. 051  | 63626214. 4  |
| M131T723   | 131. 0325349 | 722. 604  | 165641961. 6 |
| M131T442   | 131. 0326156 | 442. 399  | 107219131    |
| M131T158   | 131. 0326628 | 158. 1    | 57470192. 63 |
| M131T93    | 131. 0329999 | 92. 9618  | 312097618. 5 |
| M131T255   | 131. 0325366 | 255. 113  | 33198848. 09 |
| M131T804   | 131. 0326459 | 803. 615  | 144509501. 8 |
| M131T490   | 131. 0325812 | 490. 434  | 81522330. 52 |
| M131T274   | 131. 0340752 | 273. 6195 | 13953372. 62 |
| M131T266   | 131. 0340904 | 265. 541  | 27120805. 09 |
| M131T580   | 131. 0341315 | 579. 883  | 39634657. 68 |
| M131T600   | 131. 0340481 | 599. 904  | 29654821. 81 |
| M131T346   | 131. 0340408 | 345. 761  | 30771354. 33 |
| M131T353   | 131. 0340426 | 353. 163  | 32652529. 89 |
| M131T622   | 131. 0340266 | 621. 547  | 38308218. 14 |
| M131T472   | 131. 0340547 | 471. 768  | 32166674. 44 |
| M131T223   | 131. 0340591 | 222. 943  | 40632874. 81 |
| M131T559   | 131. 0339435 | 558. 574  | 27385225. 44 |
| M131T117   | 131. 0340124 | 116. 52   | 54029419. 02 |
| M131T205   | 131. 0340543 | 204. 895  | 34062663. 91 |
| M131T197   | 131. 0339417 | 197. 335  | 30482954. 45 |
| M131T609   | 131. 0341381 | 609. 19   | 34888996. 81 |
| M131T464   | 131. 0340586 | 464. 011  | 31994458. 32 |
| M131T176   | 131. 034046  | 176. 104  | 48061508. 17 |
| M131T188   | 131. 0340152 | 188. 174  | 34654954. 66 |
| M131T136_2 | 131. 034044  | 135. 795  | 64754443. 31 |
| M131T688   | 131. 0341335 | 688. 189  | 35346724. 3  |

|            |              |           |              |
|------------|--------------|-----------|--------------|
| M131T517   | 131. 0339966 | 516. 908  | 27850883. 22 |
| M131T332   | 131. 0340102 | 332. 105  | 34714925. 82 |
| M131T246   | 131. 03402   | 246. 013  | 28955891. 91 |
| M131T285   | 131. 0341199 | 285. 167  | 34912120. 02 |
| M131T83    | 131. 0339083 | 82. 8986  | 312710056. 8 |
| M131T149   | 131. 0340718 | 148. 981  | 51993514. 11 |
| M131T305   | 131. 0339569 | 304. 743  | 42096908. 83 |
| M131T697   | 131. 0340547 | 697. 061  | 43920006. 58 |
| M131T376   | 131. 0340462 | 376. 15   | 34263327. 71 |
| M131T634   | 131. 0339847 | 633. 832  | 49302118. 62 |
| M131T591   | 131. 0341317 | 590. 717  | 24727571. 66 |
| M131T658   | 131. 0341211 | 658. 372  | 68147824. 84 |
| M131T571   | 131. 0341317 | 570. 599  | 35194866. 71 |
| M131T294_1 | 131. 0340377 | 294. 152  | 22140807. 57 |
| M131T362   | 131. 0340511 | 362. 384  | 30475651. 28 |
| M131T235   | 131. 0340949 | 234. 972  | 40927459. 32 |
| M131T394   | 131. 0340659 | 394. 467  | 54966186. 78 |
| M131T323   | 131. 0339209 | 322. 862  | 33825395. 72 |
| M131T87_2  | 131. 0445765 | 87. 426   | 356653514. 8 |
| M131T807   | 131. 0339992 | 806. 698  | 115560457. 4 |
| M131T294_2 | 131. 0694622 | 294. 152  | 80891674. 61 |
| M131T91    | 131. 0809162 | 90. 9026  | 208524883. 6 |
| M131T48    | 131. 0892215 | 48. 11215 | 260119. 0749 |
| M131T182   | 131. 0893887 | 182. 156  | 7437777. 332 |
| M131T755   | 131. 0899461 | 754. 814  | 2584278. 286 |
| M131T790   | 131. 0898509 | 790. 161  | 3358141. 907 |
| M131T33    | 131. 0892441 | 32. 8715  | 1470237. 954 |
| M131T746   | 131. 0899648 | 745. 747  | 2414753. 043 |
| M131T720   | 131. 0898875 | 719. 505  | 5113877. 899 |
| M131T694   | 131. 0898586 | 694. 341  | 2997242. 694 |
| M131T822   | 131. 0898216 | 821. 831  | 10612496. 23 |
| M131T764   | 131. 0899232 | 764. 034  | 2642480. 006 |
| M131T169   | 131. 0891109 | 168. 507  | 4433435. 759 |
| M131T775   | 131. 0899147 | 774. 892  | 3321978. 185 |
| M131T64    | 131. 0892417 | 64. 0412  | 2161622. 692 |
| M132T47    | 131. 983508  | 47. 399   | 73856. 27418 |
| M132T60    | 131. 9836473 | 59. 8865  | 894919. 3181 |
| M132T87_1  | 131. 9829535 | 87. 426   | 1106952. 116 |
| M132T142   | 131. 9838553 | 141. 655  | 1934659. 5   |
| M132T161   | 131. 9836982 | 161. 184  | 1578176. 194 |
| M132T112   | 131. 9840054 | 112. 287  | 3402753. 795 |
| M132T34    | 131. 9837301 | 34. 4117  | 207529. 0999 |
| M132T82    | 132. 0286165 | 81. 8855  | 402152939. 5 |
| M132T93    | 132. 0367353 | 92. 9618  | 13154548. 01 |
| M132T87_2  | 132. 0481138 | 87. 426   | 11965209. 33 |
| M132T50    | 132. 0651541 | 50. 3393  | 47620. 97866 |
| M132T294   | 132. 073295  | 294. 152  | 4350102. 251 |
| M132T91    | 132. 084362  | 90. 9026  | 8314565. 557 |
| M133T601   | 132. 8663984 | 601. 473  | 8593875. 479 |
| M133T661   | 132. 8663998 | 661. 453  | 22838277. 87 |
| M133T813   | 132. 8661356 | 812. 68   | 7129401. 166 |
| M133T514   | 132. 8664132 | 513. 768  | 6789192. 436 |
| M133T831   | 132. 866324  | 830. 813  | 15123983. 33 |
| M133T795   | 132. 8661019 | 794. 753  | 12811866. 85 |

|            |              |          |              |
|------------|--------------|----------|--------------|
| M133T535   | 132. 8664412 | 535. 488 | 9732065. 666 |
| M133T453   | 132. 8664437 | 453. 126 | 3942296. 709 |
| M133T724_1 | 132. 8660085 | 724. 158 | 12674695. 7  |
| M133T568   | 132. 8664333 | 567. 543 | 6099336. 889 |
| M133T781_1 | 132. 8661576 | 780. 958 | 16110069. 52 |
| M133T583   | 132. 8664052 | 582. 96  | 9505500. 047 |
| M133T688_1 | 132. 8663372 | 688. 189 | 10829341. 71 |
| M133T632   | 132. 8664189 | 632. 288 | 14372319. 82 |
| M133T752_1 | 132. 8662808 | 751. 766 | 31302786. 88 |
| M133T804   | 132. 8661655 | 803. 615 | 11169872. 57 |
| M133T552   | 132. 8664123 | 552. 493 | 10552830. 76 |
| M133T525   | 132. 8664096 | 524. 56  | 6044314. 699 |
| M133T698_1 | 132. 8663253 | 698. 034 | 10022516. 47 |
| M133T713_1 | 132. 8662762 | 713. 292 | 17659966. 52 |
| M133T503   | 132. 8664077 | 502. 873 | 7120844. 551 |
| M133T617_1 | 132. 8663998 | 616. 891 | 7482549. 706 |
| M133T61    | 132. 8987415 | 60. 9725 | 4208410. 801 |
| M133T33    | 132. 8984394 | 32. 8715 | 5227905. 482 |
| M133T572   | 132. 898708  | 572. 152 | 622194. 8859 |
| M133T44    | 132. 8987294 | 44. 0652 | 628869. 901  |
| M133T835_1 | 132. 8985659 | 835. 329 | 8154340. 055 |
| M133T293   | 132. 9220146 | 292. 621 | 1516833. 353 |
| M133T302   | 132. 9220097 | 301. 725 | 609071. 2745 |
| M133T781_2 | 132. 9219002 | 780. 958 | 3490669. 524 |
| M133T796   | 132. 9219203 | 796. 202 | 3277680. 441 |
| M133T835_2 | 132. 9211631 | 835. 329 | 4435770. 845 |
| M133T84    | 132. 9448769 | 83. 9405 | 16669841. 46 |
| M133T78_1  | 132. 9624945 | 78. 2661 | 64173044. 88 |
| M133T131   | 132. 9796968 | 131. 207 | 3843283. 744 |
| M133T111   | 132. 979675  | 110. 926 | 4111060. 576 |
| M133T272   | 133. 0125866 | 272. 312 | 6783844. 708 |
| M133T267   | 133. 0123295 | 266. 709 | 7506521. 019 |
| M133T537   | 133. 0124252 | 537. 051 | 3522799. 867 |
| M133T663   | 133. 0123999 | 663. 008 | 7133572. 64  |
| M133T78_2  | 133. 0115279 | 78. 2661 | 9630706741   |
| M133T649   | 133. 012417  | 649. 195 | 7491435. 3   |
| M133T369   | 133. 0124307 | 368. 559 | 6894528. 452 |
| M133T789   | 133. 0124245 | 788. 604 | 2847237. 653 |
| M133T834   | 133. 0124016 | 833. 866 | 3672547. 82  |
| M133T127   | 133. 0118384 | 126. 755 | 51263888. 38 |
| M133T421   | 133. 0124227 | 420. 799 | 5314177. 709 |
| M133T107   | 133. 012653  | 106. 648 | 63473253. 45 |
| M133T823   | 133. 0124212 | 823. 375 | 3193076. 337 |
| M133T464   | 133. 0124591 | 464. 011 | 4706605. 308 |
| M133T234   | 133. 0125836 | 233. 519 | 17252888. 39 |
| M133T724_2 | 133. 0124292 | 724. 158 | 5376534. 58  |
| M133T766   | 133. 0124371 | 765. 588 | 3862385. 639 |
| M133T172   | 133. 0126385 | 171. 546 | 42624568. 33 |
| M133T741   | 133. 0124041 | 741. 077 | 5629946. 543 |
| M133T546   | 133. 012498  | 546. 308 | 4355243. 183 |
| M133T506   | 133. 012383  | 505. 99  | 7441400. 002 |
| M133T529   | 133. 0124255 | 529. 248 | 4077954. 412 |
| M133T394   | 133. 0124648 | 394. 467 | 5237766. 935 |
| M133T294   | 133. 0130198 | 294. 152 | 68256600. 21 |

|            |             |         |             |
|------------|-------------|---------|-------------|
| M133T387   | 133.0124616 | 386.78  | 5855554.259 |
| M133T597   | 133.0124072 | 596.795 | 4585825.281 |
| M133T489   | 133.0124178 | 488.885 | 5530802.164 |
| M133T799   | 133.0124081 | 799.306 | 4929063.678 |
| M133T200   | 133.0125907 | 200.362 | 99155572.22 |
| M133T378   | 133.0124535 | 377.64  | 6598717.872 |
| M133T146   | 133.0126784 | 146.08  | 41860278.66 |
| M133T628   | 133.0124048 | 627.731 | 4123200.994 |
| M133T814   | 133.0124857 | 814.118 | 4078794.606 |
| M133T691   | 133.012465  | 691.303 | 14743094.1  |
| M133T564   | 133.0124275 | 564.487 | 7498249.346 |
| M133T243   | 133.0133413 | 243.386 | 5931203.473 |
| M133T249   | 133.0133378 | 248.622 | 6629744.699 |
| M133T261   | 133.0133473 | 261.138 | 8009644.088 |
| M133T346   | 133.0135883 | 345.761 | 19279912.36 |
| M133T588   | 133.0133545 | 587.595 | 3420242.13  |
| M133T410   | 133.0133947 | 409.881 | 8136508.047 |
| M133T578   | 133.0133389 | 578.353 | 5028080.524 |
| M133T776   | 133.0134629 | 776.391 | 6135716.239 |
| M133T473   | 133.013337  | 473.329 | 5489528.365 |
| M133T752_2 | 133.0133131 | 751.766 | 4449006.683 |
| M133T92    | 133.0134302 | 91.9113 | 370291347.5 |
| M133T323   | 133.0134984 | 322.862 | 12482024.13 |
| M133T617_2 | 133.0133818 | 616.891 | 4320221.299 |
| M133T439   | 133.0134074 | 439.27  | 7773521.229 |
| M133T82    | 133.0318411 | 81.8855 | 15660120.29 |
| M133T98    | 133.0491568 | 97.682  | 36161474.86 |
| M133T721   | 133.0494389 | 721.058 | 6599643.15  |
| M133T104   | 133.0491808 | 104.493 | 18597833.46 |
| M133T688_2 | 133.0494527 | 688.189 | 6148021.409 |
| M133T90    | 133.0492373 | 89.8937 | 41716689.9  |
| M133T811   | 133.0483315 | 811.292 | 32720102.48 |
| M133T758   | 133.0493374 | 757.881 | 9134260.532 |
| M133T738   | 133.049416  | 737.955 | 11100386.78 |
| M133T713_2 | 133.0492999 | 713.292 | 4866923.945 |
| M133T698_2 | 133.0494426 | 698.034 | 6397611.411 |
| M133T677   | 133.0493533 | 676.878 | 8954619.325 |
| M133T78_3  | 133.0620348 | 78.2661 | 64340596.67 |
| M134T78    | 134.015937  | 78.2661 | 406004542.7 |
| M134T770   | 134.0454402 | 770.235 | 6089652.731 |
| M134T415   | 134.0454881 | 414.571 | 6389552.347 |
| M134T687   | 134.0454105 | 687.214 | 5225818.981 |
| M134T793   | 134.0453343 | 793.233 | 5650086.328 |
| M134T598   | 134.0454517 | 598.341 | 16596945.76 |
| M134T515   | 134.0453553 | 515.338 | 7900145.292 |
| M134T826   | 134.0453773 | 826.333 | 4888211.512 |
| M134T556   | 134.0454925 | 555.524 | 6954680.244 |
| M134T470   | 134.045458  | 470.253 | 15252038.42 |
| M134T500   | 134.0453355 | 499.759 | 7811739.898 |
| M134T805   | 134.045475  | 805.145 | 4645899.136 |
| M134T666   | 134.0454137 | 666.058 | 4629610.264 |
| M134T736   | 134.0453419 | 736.458 | 20265136.48 |
| M134T675   | 134.0452903 | 675.322 | 5516341.609 |
| M134T376   | 134.0455108 | 376.15  | 10049133.77 |

|            |              |           |              |
|------------|--------------|-----------|--------------|
| M134T347   | 134. 0462957 | 347. 166  | 58574213. 13 |
| M134T569   | 134. 0453599 | 569. 091  | 5959331. 604 |
| M134T696   | 134. 0454403 | 695. 893  | 6601142. 291 |
| M134T394   | 134. 0454833 | 394. 467  | 9183945. 798 |
| M134T424   | 134. 0454649 | 423. 877  | 6835164. 598 |
| M134T632   | 134. 045437  | 632. 288  | 10992979. 24 |
| M134T299   | 134. 0449633 | 298. 619  | 500693746. 6 |
| M134T387   | 134. 045411  | 386. 78   | 6297083. 875 |
| M134T542   | 134. 0454795 | 541. 673  | 6500163. 636 |
| M134T784   | 134. 0453582 | 784. 051  | 4231470. 678 |
| M134T657   | 134. 0453739 | 656. 84   | 5445710. 059 |
| M134T835   | 134. 0453266 | 835. 329  | 3550339. 663 |
| M134T814   | 134. 0453538 | 814. 118  | 4769819. 763 |
| M134T439   | 134. 0454836 | 439. 27   | 9140560. 005 |
| M134T324   | 134. 0596803 | 324. 413  | 746639. 357  |
| M135T837   | 134. 8423547 | 836. 769  | 1954370. 697 |
| M135T661   | 134. 893156  | 661. 453  | 33644345. 09 |
| M135T61    | 134. 8942566 | 60. 9725  | 91070967. 29 |
| M135T724   | 134. 8931641 | 724. 158  | 50175284. 92 |
| M135T33    | 134. 8942404 | 32. 8715  | 102417446. 7 |
| M135T697   | 134. 8925015 | 697. 061  | 24596283. 2  |
| M135T798   | 134. 8931503 | 797. 757  | 102392207. 1 |
| M135T713_1 | 134. 8924611 | 713. 292  | 52567337. 07 |
| M135T677   | 134. 8931554 | 676. 878  | 38193818. 08 |
| M135T835   | 134. 8931565 | 835. 329  | 207493429. 8 |
| M135T762   | 134. 8931561 | 762. 482  | 186018309. 4 |
| M135T782   | 134. 8925014 | 782. 5    | 169366336. 2 |
| M135T814_1 | 134. 8923941 | 814. 118  | 294609004    |
| M135T50    | 134. 9445547 | 50. 208   | 53021. 50197 |
| M135T813   | 134. 9440661 | 812. 68   | 1156350. 219 |
| M135T834   | 134. 9440308 | 833. 866  | 1011160. 085 |
| M135T62    | 134. 944577  | 62. 1587  | 234495. 5776 |
| M135T31    | 134. 9436736 | 31. 4228  | 493178. 1883 |
| M135T825   | 134. 9441053 | 824. 864  | 790131. 0861 |
| M135T78    | 135. 016954  | 78. 2661  | 93024535. 57 |
| M135T52    | 135. 0297947 | 52. 40645 | 123935. 3841 |
| M135T59    | 135. 0297808 | 58. 8277  | 316737. 7238 |
| M135T63    | 135. 0297624 | 63. 4462  | 338846. 0943 |
| M135T84    | 135. 0280732 | 83. 9405  | 674140779. 1 |
| M135T107   | 135. 02848   | 106. 648  | 10475801. 3  |
| M135T179   | 135. 0295985 | 179. 046  | 16061060. 95 |
| M135T40    | 135. 0298211 | 40. 4091  | 496000. 9043 |
| M135T729   | 135. 043483  | 728. 711  | 3946520. 862 |
| M135T557   | 135. 0434573 | 557. 078  | 4504952. 928 |
| M135T680   | 135. 043422  | 679. 873  | 2834581. 953 |
| M135T356   | 135. 0435153 | 356. 274  | 10919933. 19 |
| M135T595   | 135. 043505  | 595. 35   | 6435424. 199 |
| M135T442   | 135. 0434872 | 442. 399  | 18087534. 56 |
| M135T781   | 135. 0434577 | 780. 958  | 2633102. 912 |
| M135T500   | 135. 0434715 | 499. 759  | 4717806. 18  |
| M135T701   | 135. 0433778 | 701. 149  | 4151635. 84  |
| M135T396   | 135. 0435179 | 396. 023  | 5295223. 288 |
| M135T476   | 135. 0435075 | 476. 451  | 3901160. 451 |
| M135T586   | 135. 0435182 | 586. 044  | 3545307. 667 |

|            |              |           |              |
|------------|--------------|-----------|--------------|
| M135T796   | 135. 0433796 | 796. 202  | 3527058. 037 |
| M135T804   | 135. 0435016 | 803. 615  | 2581172. 567 |
| M135T672   | 135. 0434168 | 672. 229  | 5655892. 249 |
| M135T577   | 135. 0434552 | 576. 787  | 5200221. 963 |
| M135T487   | 135. 0435099 | 487. 329  | 4651040. 055 |
| M135T612   | 135. 0432446 | 612. 3    | 10824614. 9  |
| M135T758   | 135. 043386  | 757. 881  | 7541805. 367 |
| M135T738   | 135. 0434871 | 737. 955  | 3157920. 608 |
| M135T529   | 135. 0435372 | 529. 248  | 41197788. 65 |
| M135T408   | 135. 0435171 | 408. 368  | 4404423. 489 |
| M135T378   | 135. 0434678 | 377. 64   | 6159086. 754 |
| M135T773   | 135. 0434801 | 773. 333  | 2838983. 424 |
| M135T829   | 135. 0434028 | 829. 321  | 3451283. 772 |
| M135T690   | 135. 043509  | 689. 75   | 4287081. 611 |
| M135T657   | 135. 0433875 | 656. 84   | 4187833. 063 |
| M135T713_2 | 135. 0434315 | 713. 292  | 5383729. 146 |
| M135T334   | 135. 0434818 | 333. 655  | 6714894. 89  |
| M135T312   | 135. 0433974 | 312. 058  | 7534202. 24  |
| M135T814_2 | 135. 0434292 | 814. 118  | 2659090. 876 |
| M135T638   | 135. 0434678 | 638. 484  | 8898227. 562 |
| M135T299   | 135. 0493265 | 298. 619  | 25163443. 68 |
| M136T33_1  | 135. 8928406 | 32. 8715  | 11277043. 95 |
| M136T50    | 135. 8931064 | 50. 208   | 755454. 1757 |
| M136T61    | 135. 8930687 | 61. 4369  | 6286982. 472 |
| M136T813   | 135. 8931644 | 812. 68   | 23243765. 52 |
| M136T724   | 135. 8933294 | 724. 158  | 5363117. 511 |
| M136T740   | 135. 8933091 | 739. 509  | 6083169. 55  |
| M136T764   | 135. 8933275 | 764. 034  | 7781558. 619 |
| M136T798   | 135. 8931867 | 797. 757  | 16971271. 95 |
| M136T784   | 135. 8931884 | 784. 051  | 12735385. 94 |
| M136T713   | 135. 8932891 | 713. 292  | 4835900. 805 |
| M136T773   | 135. 8933147 | 773. 333  | 8459156. 04  |
| M136T835_1 | 135. 8931441 | 835. 329  | 18576864. 99 |
| M136T753   | 135. 8933163 | 753. 315  | 8303325. 73  |
| M136T766   | 135. 9694211 | 765. 588  | 12469162. 88 |
| M136T33_2  | 135. 9696024 | 32. 8715  | 1547094. 196 |
| M136T778   | 135. 9694569 | 777. 92   | 12957991. 67 |
| M136T752   | 135. 9695364 | 751. 766  | 11095431. 68 |
| M136T804   | 135. 9695167 | 803. 615  | 40271767. 26 |
| M136T835_2 | 135. 9694244 | 835. 329  | 20143577. 74 |
| M136T79    | 136. 0204088 | 79. 4105  | 1880391. 62  |
| M136T37    | 136. 0151108 | 37. 4486  | 183669. 1585 |
| M136T532   | 136. 0150069 | 532. 372  | 7402182. 489 |
| M136T179   | 136. 0328947 | 179. 046  | 775355. 2861 |
| M136T288   | 136. 0389354 | 287. 981  | 3628242. 156 |
| M136T164   | 136. 0389109 | 164. 077  | 5119643. 69  |
| M136T83    | 136. 0391028 | 82. 8986  | 1707417. 408 |
| M136T466   | 136. 0382627 | 465. 575  | 5593054. 484 |
| M136T425   | 136. 0389023 | 425. 439  | 4118175. 83  |
| M136T450   | 136. 0391584 | 450. 052  | 24313683. 99 |
| M136T56    | 136. 0470552 | 55. 99345 | 40611. 59524 |
| M136T62    | 136. 0470458 | 62. 1587  | 94576. 70027 |
| M136T67    | 136. 0471744 | 67. 1831  | 83824. 81673 |
| M136T43    | 136. 0471484 | 43. 4241  | 488679. 134  |

|            |              |          |              |
|------------|--------------|----------|--------------|
| M136T529   | 136. 0470635 | 529. 248 | 3110103. 63  |
| M136T299   | 136. 0523013 | 298. 619 | 374303. 653  |
| M136T296   | 136. 0864457 | 295. 704 | 1858468. 899 |
| M137T787   | 136. 8608284 | 787. 078 | 3171770. 523 |
| M137T767   | 136. 8612532 | 767. 145 | 4815844. 542 |
| M137T834   | 136. 8607579 | 833. 866 | 4222975. 304 |
| M137T724_1 | 136. 8612739 | 724. 158 | 5893104. 862 |
| M137T805_1 | 136. 8605948 | 805. 145 | 3434781. 144 |
| M137T688   | 136. 8612523 | 688. 189 | 3739472. 012 |
| M137T816   | 136. 8613579 | 815. 664 | 3120765. 858 |
| M137T778   | 136. 8606837 | 777. 92  | 3814355. 323 |
| M137T740_1 | 136. 8612925 | 739. 509 | 2898403. 319 |
| M137T712   | 136. 8612743 | 711. 794 | 5041215. 504 |
| M137T752   | 136. 8612463 | 751. 766 | 5532816. 991 |
| M137T698   | 136. 8613296 | 698. 034 | 2521949. 777 |
| M137T677   | 136. 861273  | 676. 878 | 2974612. 176 |
| M137T140   | 136. 8902464 | 140. 209 | 2147335. 156 |
| M137T813   | 136. 8900426 | 812. 68  | 33560664. 66 |
| M137T755   | 136. 8897935 | 754. 814 | 27926999. 42 |
| M137T781   | 136. 8897918 | 780. 958 | 43103760. 74 |
| M137T724_2 | 136. 889741  | 724. 158 | 15347305. 13 |
| M137T740_2 | 136. 8897789 | 739. 509 | 16584806. 8  |
| M137T773_1 | 136. 8897873 | 773. 333 | 22266743. 82 |
| M137T798   | 136. 8897677 | 797. 757 | 39380792. 83 |
| M137T713_1 | 136. 890186  | 713. 292 | 15942857. 26 |
| M137T835   | 136. 8898301 | 835. 329 | 65768495. 57 |
| M137T50    | 136. 8905635 | 49. 8139 | 4296229. 814 |
| M137T62    | 136. 8905364 | 62. 1587 | 19484041. 08 |
| M137T33    | 136. 8905818 | 32. 8715 | 35784598. 99 |
| M137T36    | 136. 9308807 | 36. 0041 | 375686. 1769 |
| M137T160   | 136. 9721688 | 159. 635 | 3613759. 71  |
| M137T439_1 | 136. 9712387 | 439. 27  | 508623. 5153 |
| M137T277   | 137. 0228817 | 277. 135 | 3314770. 203 |
| M137T269   | 137. 0229679 | 268. 614 | 4238312. 975 |
| M137T601   | 137. 0230105 | 601. 473 | 15103774. 43 |
| M137T329   | 137. 0229919 | 328. 999 | 14369045. 26 |
| M137T285   | 137. 0229873 | 285. 167 | 12148849. 73 |
| M137T750   | 137. 022952  | 750. 298 | 14553568. 74 |
| M137T557   | 137. 0229305 | 557. 078 | 19803533. 35 |
| M137T84    | 137. 0228997 | 83. 9405 | 30823937. 05 |
| M137T668   | 137. 0229419 | 667. 612 | 11735917. 32 |
| M137T609   | 137. 0229091 | 609. 19  | 11659554. 12 |
| M137T512   | 137. 0228761 | 512. 228 | 22477953. 21 |
| M137T205_1 | 137. 0230506 | 204. 895 | 21915308. 88 |
| M137T543   | 137. 0228767 | 543. 216 | 16377810. 61 |
| M137T234   | 137. 0229174 | 233. 519 | 12505932. 57 |
| M137T724_3 | 137. 0229123 | 724. 158 | 12264337. 39 |
| M137T805_2 | 137. 0228847 | 805. 145 | 57742186. 79 |
| M137T655   | 137. 0229005 | 655. 321 | 16294647. 74 |
| M137T224   | 137. 0229371 | 224. 484 | 16544500. 06 |
| M137T589   | 137. 0229345 | 589. 157 | 16786814. 53 |
| M137T131   | 137. 0230399 | 131. 207 | 26402096. 03 |
| M137T396   | 137. 0229686 | 396. 023 | 16434313. 85 |
| M137T416   | 137. 0228934 | 416. 128 | 22094853. 98 |



|            |              |          |              |
|------------|--------------|----------|--------------|
| M137T246   | 137. 0229656 | 246. 013 | 8074316. 801 |
| M137T694   | 137. 0228707 | 694. 341 | 14369864. 18 |
| M137T577   | 137. 022873  | 576. 787 | 14883324. 83 |
| M137T305   | 137. 0228942 | 304. 743 | 21041294. 36 |
| M137T740_3 | 137. 0229509 | 739. 509 | 11702161. 62 |
| M137T634   | 137. 0229232 | 633. 832 | 37895709. 77 |
| M137T484   | 137. 0228715 | 484. 221 | 23554046. 95 |
| M137T352   | 137. 0229964 | 351. 663 | 10088895. 02 |
| M137T257   | 137. 0229009 | 257. 001 | 7385061. 299 |
| M137T381   | 137. 0222917 | 380. 608 | 55101036. 1  |
| M137T467   | 137. 0228682 | 467. 127 | 47015011. 59 |
| M137T362   | 137. 0230683 | 362. 384 | 15576881. 96 |
| M137T532   | 137. 0229318 | 532. 372 | 22846237. 42 |
| M137T764   | 137. 0229618 | 764. 034 | 15273693. 97 |
| M137T678   | 137. 0229142 | 678. 416 | 14253404. 3  |
| M137T501   | 137. 0229805 | 501. 318 | 21716504. 97 |
| M137T343   | 137. 0229416 | 342. 819 | 8602503. 623 |
| M137T713_2 | 137. 0229604 | 713. 292 | 21187167. 23 |
| M137T773_2 | 137. 0229282 | 773. 333 | 11689308. 93 |
| M137T439_2 | 137. 0237731 | 439. 27  | 102724936. 8 |
| M137T205_2 | 137. 0340951 | 204. 895 | 3995650. 019 |
| M137T169   | 137. 0340799 | 168. 507 | 4345657. 58  |
| M137T637   | 137. 0594572 | 636. 925 | 377241. 2735 |
| M137T439_3 | 137. 0751733 | 439. 27  | 460775. 6907 |
| M138T661   | 137. 8903106 | 661. 453 | 1327689. 996 |
| M138T61    | 137. 8903246 | 60. 9725 | 3138162. 777 |
| M138T43    | 137. 8903227 | 43. 4241 | 467022. 1338 |
| M138T33    | 137. 890004  | 32. 8715 | 3909000. 901 |
| M138T835   | 137. 8902725 | 835. 329 | 7140947. 741 |
| M138T413   | 138. 0177499 | 413. 006 | 4781204. 038 |
| M138T603   | 138. 0177161 | 603. 04  | 10277037. 3  |
| M138T557   | 138. 0176579 | 557. 078 | 7209699. 055 |
| M138T807   | 138. 0177255 | 806. 698 | 9576517. 868 |
| M138T831   | 138. 0176812 | 830. 813 | 10530787. 64 |
| M138T795   | 138. 0176409 | 794. 753 | 7629083. 48  |
| M138T665   | 138. 0177524 | 664. 565 | 5854314. 217 |
| M138T226   | 138. 017647  | 225. 965 | 21642443. 98 |
| M138T687   | 138. 0177402 | 687. 214 | 5353424. 157 |
| M138T523   | 138. 0176201 | 523. 055 | 3547778. 542 |
| M138T293   | 138. 0177783 | 292. 621 | 24060270. 51 |
| M138T540   | 138. 0177555 | 540. 152 | 5306688. 713 |
| M138T179   | 138. 0176836 | 179. 046 | 100776213. 3 |
| M138T393   | 138. 0177735 | 392. 905 | 10883986. 43 |
| M138T458   | 138. 0176436 | 457. 763 | 7747867. 833 |
| M138T642   | 138. 0177141 | 641. 603 | 13474302. 95 |
| M138T620   | 138. 0179431 | 619. 986 | 16615831. 72 |
| M138T781   | 138. 0177052 | 780. 958 | 8456959. 31  |
| M138T500   | 138. 0177129 | 499. 759 | 19716617. 89 |
| M138T98    | 138. 0181545 | 97. 682  | 83179142. 38 |
| M138T344   | 138. 0177448 | 344. 233 | 9998361. 338 |
| M138T577   | 138. 0177155 | 576. 787 | 5185297. 883 |
| M138T262   | 138. 0177067 | 262. 302 | 31230844. 28 |
| M138T569   | 138. 0177046 | 569. 091 | 5133881. 593 |
| M138T376   | 138. 0177309 | 376. 15  | 10333526. 69 |

|           |              |           |              |
|-----------|--------------|-----------|--------------|
| M138T740  | 138. 0177063 | 739. 509  | 19629994. 6  |
| M138T591  | 138. 0177611 | 590. 717  | 6150286. 823 |
| M138T424  | 138. 0176852 | 423. 877  | 5129699. 855 |
| M138T531  | 138. 0177175 | 530. 804  | 5137843. 266 |
| M138T364  | 138. 0178013 | 363. 928  | 8528895. 205 |
| M138T657  | 138. 017744  | 656. 84   | 6838736. 934 |
| M138T146  | 138. 0180189 | 146. 08   | 183455893. 1 |
| M138T678  | 138. 0175828 | 678. 416  | 7103241. 146 |
| M138T698  | 138. 0177401 | 698. 034  | 7291567. 603 |
| M138T323  | 138. 0177183 | 322. 862  | 17064128. 87 |
| M138T713  | 138. 0176666 | 713. 292  | 13205935. 26 |
| M138T108  | 138. 0180095 | 108. 082  | 144585711    |
| M138T199  | 138. 0177173 | 198. 821  | 33678156. 05 |
| M138T381  | 138. 0282661 | 380. 608  | 2842535. 807 |
| M138T170  | 138. 0288557 | 170. 049  | 371246. 7267 |
| M138T439  | 138. 0272816 | 439. 27   | 6031027. 418 |
| M138T305  | 138. 0545836 | 304. 743  | 7103952. 347 |
| M138T487  | 138. 0545588 | 487. 329  | 4732925. 888 |
| M138T324  | 138. 0547323 | 324. 413  | 14238254. 41 |
| M139T755  | 138. 8885066 | 754. 814  | 408634. 5295 |
| M139T798  | 138. 8884947 | 797. 757  | 961887. 6887 |
| M139T145  | 139. 0020045 | 144. 706  | 13131959. 92 |
| M139T315  | 139. 0020424 | 315. 162  | 4480882. 72  |
| M139T107  | 139. 0021535 | 106. 648  | 12973950. 1  |
| M139T302  | 139. 0028951 | 301. 725  | 4066095. 219 |
| M139T125  | 139. 0020515 | 125. 274  | 11485077. 6  |
| M139T56   | 139. 0135054 | 55. 99345 | 184542. 8551 |
| M139T49   | 139. 0134482 | 49. 2883  | 413429. 3006 |
| M139T42   | 139. 0134819 | 42. 3731  | 567218. 3914 |
| M139T31   | 139. 0134791 | 31. 4228  | 330917. 4408 |
| M139T66_1 | 139. 0134442 | 66. 2043  | 495311. 175  |
| M139T179  | 139. 021436  | 179. 046  | 4243471. 577 |
| M139T620  | 139. 0213915 | 619. 986  | 761615. 5983 |
| M139T224  | 139. 0226517 | 224. 484  | 1270995. 814 |
| M139T109  | 139. 0215652 | 109. 475  | 22233196. 28 |
| M139T335  | 139. 0386421 | 335. 153  | 2897717. 83  |
| M139T462  | 139. 0386176 | 462. 446  | 3342983. 99  |
| M139T323  | 139. 038626  | 322. 862  | 2633023. 269 |
| M139T53   | 139. 0496848 | 53. 4226  | 98925. 92193 |
| M139T43   | 139. 0497079 | 43. 4241  | 141894. 8155 |
| M139T47   | 139. 0496472 | 47. 399   | 260653. 1349 |
| M139T39   | 139. 0496941 | 38. 9885  | 486983. 3698 |
| M139T66_2 | 139. 0496968 | 66. 2043  | 881016. 241  |
| M139T294  | 139. 074995  | 294. 152  | 3973877. 234 |
| M140T31   | 139. 9973399 | 31. 4228  | 584427. 5483 |
| M140T106  | 140. 0336952 | 105. 537  | 23589932. 97 |
| M140T117  | 140. 0336779 | 116. 52   | 9375293. 167 |
| M140T215  | 140. 0336979 | 215. 4    | 6885496. 024 |
| M141T44   | 140. 9846874 | 44. 33235 | 1159258. 874 |
| M141T51   | 140. 9847693 | 50. 6021  | 1936473. 785 |
| M141T61_1 | 140. 9847739 | 60. 9725  | 7274798. 532 |
| M141T807  | 140. 9837811 | 806. 698  | 12146560. 79 |
| M141T826  | 140. 9838586 | 826. 333  | 7133283. 109 |
| M141T90   | 140. 9845847 | 89. 8937  | 2041254. 271 |

|          |             |         |             |
|----------|-------------|---------|-------------|
| M141T835 | 140.9837455 | 835.329 | 6559961.212 |
| M141T34  | 140.984671  | 34.4117 | 4871436.995 |
| M141T272 | 141.0176116 | 271.596 | 3079306.81  |
| M141T276 | 141.0176316 | 276.104 | 4016662.87  |
| M141T266 | 141.0176891 | 265.541 | 6522970.296 |
| M141T435 | 141.0176571 | 434.617 | 5448654.96  |
| M141T537 | 141.0176831 | 537.051 | 8088959.542 |
| M141T413 | 141.0176619 | 413.006 | 6915958.989 |
| M141T291 | 141.0176531 | 291.076 | 8092859.95  |
| M141T600 | 141.0176362 | 599.904 | 4620475.783 |
| M141T145 | 141.0176958 | 144.706 | 38809283.79 |
| M141T709 | 141.0176227 | 708.697 | 4546802.823 |
| M141T767 | 141.0177163 | 767.145 | 5995699.374 |
| M141T106 | 141.0178133 | 105.537 | 56628083.47 |
| M141T346 | 141.0176999 | 345.761 | 12709446.84 |
| M141T209 | 141.0176986 | 209.472 | 15552915.11 |
| M141T559 | 141.0176343 | 558.574 | 4058180.257 |
| M141T687 | 141.0176293 | 687.214 | 5789506.692 |
| M141T453 | 141.0176964 | 453.126 | 5668973.719 |
| M141T668 | 141.0175476 | 667.612 | 3372311.812 |
| M141T608 | 141.0176581 | 607.625 | 3743744.177 |
| M141T793 | 141.0176944 | 793.233 | 6458468.825 |
| M141T578 | 141.0176531 | 578.353 | 7906289.294 |
| M141T176 | 141.0177289 | 176.104 | 10767482    |
| M141T473 | 141.0176956 | 473.329 | 5004879.506 |
| M141T96  | 141.0177519 | 96.4922 | 21802152.02 |
| M141T188 | 141.0176633 | 188.174 | 9703214.007 |
| M141T326 | 141.0176684 | 325.901 | 19288464.97 |
| M141T635 | 141.0176565 | 635.37  | 15918223.88 |
| M141T568 | 141.0175671 | 567.543 | 4400993.1   |
| M141T244 | 141.0177212 | 243.976 | 3776426.61  |
| M141T500 | 141.0176011 | 499.759 | 4672687.121 |
| M141T781 | 141.0176822 | 780.958 | 4629414.079 |
| M141T805 | 141.0178017 | 805.145 | 3550816.928 |
| M141T237 | 141.0176226 | 236.518 | 6115472.488 |
| M141T379 | 141.0177371 | 379.066 | 12623848.04 |
| M141T365 | 141.0180368 | 365.475 | 15380308.83 |
| M141T466 | 141.0176432 | 465.575 | 6011969.554 |
| M141T444 | 141.0177626 | 443.961 | 5251358.274 |
| M141T300 | 141.017687  | 300.176 | 12380227.74 |
| M141T697 | 141.0175998 | 697.061 | 5554216.965 |
| M141T169 | 141.0176612 | 168.507 | 8468886.462 |
| M141T425 | 141.0176966 | 425.439 | 5642219.05  |
| M141T118 | 141.0176247 | 117.954 | 35999105.96 |
| M141T257 | 141.0175753 | 257.001 | 4931922.606 |
| M141T509 | 141.0175559 | 509.11  | 5365251.166 |
| M141T726 | 141.0175779 | 725.713 | 4639886.713 |
| M141T752 | 141.0175968 | 751.766 | 9703370.104 |
| M141T486 | 141.0176583 | 485.784 | 7741472.315 |
| M141T405 | 141.0177349 | 405.254 | 4668488.952 |
| M141T394 | 141.0176664 | 394.467 | 6819184.609 |
| M141T677 | 141.0175762 | 676.878 | 5573227.95  |
| M141T53  | 141.0290434 | 52.5378 | 269293.6175 |
| M141T60  | 141.0290461 | 59.8865 | 267909.512  |

|            |              |           |              |
|------------|--------------|-----------|--------------|
| M141T43    | 141. 0290896 | 42. 8986  | 819144. 2329 |
| M141T68_1  | 141. 0290536 | 67. 6441  | 397404. 2037 |
| M141T47    | 141. 0541788 | 46. 77435 | 207929. 9812 |
| M141T61_2  | 141. 0541954 | 60. 9725  | 263867. 9643 |
| M141T68_2  | 141. 0541345 | 67. 6441  | 581871. 6503 |
| M141T158   | 141. 0542047 | 158. 1    | 2420123. 102 |
| M141T517   | 141. 0543835 | 516. 908  | 1018078. 967 |
| M142T119   | 142. 0211835 | 119. 413  | 1971286. 839 |
| M142T106_1 | 142. 0211722 | 105. 537  | 2306630. 48  |
| M142T302   | 142. 0212303 | 301. 725  | 483733. 021  |
| M142T106_2 | 142. 0488456 | 105. 537  | 145695247. 3 |
| M142T127   | 142. 0492897 | 126. 755  | 55612694. 22 |
| M142T146   | 142. 0493509 | 146. 08   | 15991645. 84 |
| M143T266   | 143. 0328012 | 265. 541  | 11653786. 58 |
| M143T260   | 143. 0327312 | 259. 983  | 17815808. 82 |
| M143T272   | 143. 0328352 | 271. 596  | 10839585. 64 |
| M143T623   | 143. 0328128 | 623. 098  | 21458245. 87 |
| M143T813   | 143. 0329322 | 812. 68   | 28122104. 4  |
| M143T124   | 143. 0328731 | 123. 792  | 58301488. 04 |
| M143T253   | 143. 0327992 | 252. 703  | 14670063. 04 |
| M143T805   | 143. 032924  | 805. 145  | 28378270. 83 |
| M143T205   | 143. 0327518 | 204. 895  | 25120907. 41 |
| M143T197   | 143. 032708  | 197. 335  | 27890622. 7  |
| M143T724   | 143. 0329016 | 724. 158  | 16649959. 01 |
| M143T470   | 143. 032826  | 470. 253  | 44705577. 36 |
| M143T715   | 143. 0327395 | 714. 841  | 31759083. 53 |
| M143T305   | 143. 0327671 | 304. 743  | 19209734. 03 |
| M143T500   | 143. 0328331 | 499. 759  | 14766752. 67 |
| M143T746   | 143. 0328994 | 745. 747  | 28987110. 31 |
| M143T534   | 143. 0327974 | 533. 931  | 49492910. 39 |
| M143T732   | 143. 032875  | 731. 793  | 22618326. 75 |
| M143T285   | 143. 032921  | 285. 167  | 39039439. 48 |
| M143T577   | 143. 0327953 | 576. 787  | 50438414. 11 |
| M143T798   | 143. 0329339 | 797. 757  | 38478806. 77 |
| M143T697   | 143. 0328354 | 697. 061  | 12998744. 34 |
| M143T312   | 143. 0326902 | 312. 058  | 18903061. 34 |
| M143T634   | 143. 0327963 | 633. 832  | 24424366. 69 |
| M143T425   | 143. 0327033 | 425. 439  | 16555754. 11 |
| M143T134   | 143. 0328693 | 134. 253  | 52280536. 18 |
| M143T235   | 143. 0327405 | 234. 972  | 31321378. 27 |
| M143T378   | 143. 0328118 | 377. 64   | 20521618. 33 |
| M143T677   | 143. 0327805 | 676. 878  | 24413852. 76 |
| M143T825   | 143. 0328948 | 824. 864  | 38374388. 03 |
| M143T432   | 143. 0348025 | 431. 507  | 17788285. 07 |
| M143T494   | 143. 0347342 | 493. 56   | 17556376. 92 |
| M143T187   | 143. 033282  | 186. 689  | 42238616. 59 |
| M143T82    | 143. 0332972 | 81. 8855  | 20287558. 11 |
| M143T411   | 143. 0347546 | 411. 444  | 25252554. 65 |
| M143T327   | 143. 0347096 | 327. 449  | 36993372. 3  |
| M143T770   | 143. 0348267 | 770. 235  | 72484233. 2  |
| M143T246   | 143. 0332954 | 246. 013  | 19221659. 22 |
| M143T367   | 143. 0346849 | 367. 026  | 27284430. 44 |
| M143T221   | 143. 0332888 | 221. 453  | 31664297. 91 |
| M143T608   | 143. 0347231 | 607. 625  | 46017861. 12 |

|            |             |          |             |
|------------|-------------|----------|-------------|
| M143T94    | 143.0332977 | 94.1615  | 869984873.1 |
| M143T158   | 143.0332807 | 158.1    | 51112824.42 |
| M143T350   | 143.0332576 | 350.108  | 26877100.34 |
| M143T172   | 143.0332728 | 171.546  | 58209377.85 |
| M143T688   | 143.0332869 | 688.189  | 23031512.38 |
| M143T444   | 143.0347597 | 443.961  | 19942536.85 |
| M143T658   | 143.0347605 | 658.372  | 54739477.78 |
| M143T146   | 143.0332776 | 146.08   | 60674063.87 |
| M143T394   | 143.0348088 | 394.467  | 28453949.04 |
| M143T44    | 143.0446574 | 44.33235 | 130229.8195 |
| M143T59    | 143.0446421 | 59.2937  | 213530.1208 |
| M143T65    | 143.0446255 | 65.0166  | 228741.2694 |
| M143T52    | 143.0446422 | 52.4412  | 123825.5873 |
| M143T835_1 | 143.0333154 | 835.329  | 26387622.41 |
| M143T106   | 143.0528375 | 105.537  | 8580985.267 |
| M143T127   | 143.0527611 | 126.755  | 4339159.126 |
| M143T50    | 143.0699437 | 50.47065 | 303378.4712 |
| M143T40    | 143.069992  | 40.4091  | 918101.6202 |
| M143T33_1  | 143.0699746 | 32.8715  | 816613.3709 |
| M143T446   | 143.0698713 | 445.522  | 6002575.122 |
| M143T352   | 143.0699554 | 351.663  | 2499774.235 |
| M143T112   | 143.06977   | 112.287  | 1079419.474 |
| M143T64_1  | 143.0699234 | 64.0412  | 2171678.475 |
| M143T51    | 143.1061058 | 50.60205 | 64981.67021 |
| M143T64_2  | 143.1061172 | 63.8206  | 52786.45182 |
| M143T33_2  | 143.1061474 | 32.8715  | 1678047.066 |
| M143T698   | 143.10613   | 698.034  | 1634601.83  |
| M143T835_2 | 143.1062606 | 835.329  | 845392.849  |
| M144T47    | 143.9140875 | 47.3239  | 245912.619  |
| M144T248   | 143.9140592 | 247.773  | 630005.1925 |
| M144T63    | 143.9140475 | 63.4597  | 339811.5566 |
| M144T55    | 143.9140472 | 54.999   | 658467.8976 |
| M144T226   | 143.9140882 | 225.965  | 937138.0254 |
| M144T278   | 143.9140799 | 278.267  | 2866970.551 |
| M144T712   | 143.9140551 | 711.794  | 375600.7716 |
| M144T235   | 143.9140629 | 234.972  | 1418096.036 |
| M144T34    | 143.9140822 | 34.4117  | 841022.2092 |
| M144T85    | 144.0288116 | 85.0169  | 5804498.947 |
| M144T149   | 144.0286267 | 148.981  | 5204661.088 |
| M144T94    | 144.0369347 | 94.1615  | 53841459.94 |
| M144T62    | 144.0439054 | 62.1587  | 4751000.744 |
| M144T234   | 144.0437365 | 233.519  | 9448941.975 |
| M144T586   | 144.0424747 | 586.044  | 88417656.08 |
| M144T416   | 144.0441081 | 416.128  | 9005669.496 |
| M144T352   | 144.0440775 | 351.663  | 4582117.391 |
| M144T43    | 144.0438965 | 42.8986  | 4889488.485 |
| M144T106   | 144.0651015 | 105.537  | 10724543.61 |
| M144T175   | 144.0650262 | 174.576  | 20401296.29 |
| M144T92    | 144.0649101 | 91.9113  | 10235859.18 |
| M144T102   | 144.0762529 | 101.563  | 12105086.33 |
| M145T315   | 144.9218556 | 315.162  | 665235.8067 |
| M145T837   | 144.9218737 | 836.769  | 24538895.22 |
| M145T94_1  | 144.956991  | 94.1615  | 4808235.213 |
| M145T577   | 144.9632092 | 576.787  | 471246.5547 |

|           |             |          |             |
|-----------|-------------|----------|-------------|
| M145T154  | 144.9949488 | 153.601  | 568435.8941 |
| M145T94_2 | 145.0126981 | 94.1615  | 1510966887  |
| M145T111  | 145.0127098 | 110.926  | 78943217.91 |
| M145T586  | 145.0482181 | 586.044  | 8375024.104 |
| M145T104  | 145.0491773 | 104.493  | 26145314.13 |
| M145T152  | 145.0490987 | 152.08   | 14708912.51 |
| M145T211  | 145.0488532 | 210.883  | 8303286.363 |
| M145T83   | 145.0599133 | 82.8986  | 65938303.98 |
| M145T90   | 145.0599421 | 89.8937  | 64910856.33 |
| M145T175  | 145.0683862 | 174.576  | 627642.4015 |
| M145T54   | 145.0854959 | 53.65025 | 175479.1191 |
| M145T48   | 145.0854524 | 47.9808  | 302384.7949 |
| M145T40   | 145.0854842 | 40.4091  | 695047.8055 |
| M145T410  | 145.0848617 | 409.881  | 36487153.74 |
| M145T396  | 145.0854842 | 396.023  | 5265477.409 |
| M145T66   | 145.0854628 | 66.2043  | 1207368.41  |
| M145T87   | 145.0967188 | 87.426   | 3639211.376 |
| M146T94   | 146.01623   | 94.1615  | 73862903.15 |
| M146T51   | 146.0231264 | 50.99615 | 317507.5848 |
| M146T67   | 146.0231474 | 67.1831  | 1857235.628 |
| M146T33   | 146.02312   | 32.8715  | 2613155.608 |
| M146T83   | 146.0437968 | 82.8986  | 356016761.2 |
| M146T91   | 146.0444734 | 90.9026  | 39316070.88 |
| M146T55   | 146.0807627 | 54.8125  | 94595.02922 |
| M146T309  | 146.0805549 | 309.091  | 1481718.239 |
| M146T65   | 146.0807142 | 65.4825  | 780639.0313 |
| M146T43   | 146.0807612 | 42.8986  | 1217737.502 |
| M146T410  | 146.0888517 | 409.881  | 2341569.493 |
| M147T49   | 146.9064849 | 48.7629  | 140732.6181 |
| M147T61_1 | 146.90653   | 61.4369  | 371925.95   |
| M147T31   | 146.9065874 | 31.4228  | 534350.3441 |
| M147T284  | 146.9219427 | 283.634  | 298458.5296 |
| M147T226  | 146.9370376 | 225.965  | 661716.6055 |
| M147T118  | 146.9595636 | 117.954  | 93068776.96 |
| M147T47   | 146.9633729 | 46.6732  | 20520045.08 |
| M147T497  | 146.9642457 | 496.646  | 75474388.07 |
| M147T581  | 146.9642551 | 581.442  | 82489394.55 |
| M147T433  | 146.9641966 | 433.06   | 42464419.87 |
| M147T663  | 146.9643316 | 663.008  | 141347217.5 |
| M147T767  | 146.9643275 | 767.145  | 180109729.1 |
| M147T61_2 | 146.9654263 | 60.9725  | 137602443.2 |
| M147T514  | 146.9640708 | 513.768  | 89220986.41 |
| M147T608  | 146.9643328 | 607.625  | 103266356.9 |
| M147T655  | 146.9643378 | 655.321  | 92713977.82 |
| M147T724  | 146.964347  | 724.158  | 205787516.4 |
| M147T635  | 146.9643176 | 635.37   | 141149259.5 |
| M147T483  | 146.9642212 | 482.656  | 68207770.04 |
| M147T388  | 146.9642163 | 388.326  | 31575999.09 |
| M147T574  | 146.9642436 | 573.704  | 82745680.53 |
| M147T740  | 146.9643419 | 739.509  | 191309293.3 |
| M147T778  | 146.964384  | 777.92   | 191570685   |
| M147T592  | 146.9643201 | 592.284  | 78130419.45 |
| M147T419  | 146.9642002 | 419.237  | 32804402.41 |
| M147T446  | 146.9641911 | 445.522  | 30807874.63 |

|            |             |         |             |
|------------|-------------|---------|-------------|
| M147T804_1 | 146.9643452 | 803.615 | 539573688.8 |
| M147T690_1 | 146.9643425 | 689.75  | 344846561.6 |
| M147T542   | 146.9642169 | 541.673 | 228401622.2 |
| M147T618   | 146.9643699 | 618.45  | 85544184.15 |
| M147T34    | 146.963525  | 34.4117 | 77388832.65 |
| M147T753   | 146.964304  | 753.315 | 237245718   |
| M147T246   | 147.0105853 | 246.474 | 698002.2545 |
| M147T48    | 147.0187772 | 47.7826 | 243092.5514 |
| M147T52    | 147.0187279 | 51.9157 | 248852.6589 |
| M147T41    | 147.0185216 | 41.3907 | 794197.382  |
| M147T94    | 147.0167909 | 94.1615 | 9718642.039 |
| M147T64    | 147.0177609 | 64.0412 | 995712.5701 |
| M147T272   | 147.0276282 | 272.312 | 4239557.921 |
| M147T278   | 147.0276284 | 278.267 | 2799551.898 |
| M147T623   | 147.0276152 | 623.098 | 5681143.276 |
| M147T79    | 147.0278508 | 79.4105 | 220085226.9 |
| M147T252   | 147.0276297 | 251.727 | 6114359.586 |
| M147T729   | 147.0276393 | 728.711 | 9142849.383 |
| M147T187   | 147.0276392 | 186.689 | 13624418.4  |
| M147T145   | 147.0276577 | 144.706 | 10302253.99 |
| M147T291   | 147.0276246 | 291.076 | 10950212.14 |
| M147T258   | 147.0276053 | 258.208 | 6575647.901 |
| M147T539   | 147.0276068 | 538.619 | 10980600.74 |
| M147T266   | 147.0276378 | 265.541 | 4419807.146 |
| M147T411   | 147.0284129 | 411.444 | 16066675.59 |
| M147T245   | 147.0276134 | 244.891 | 4685399.557 |
| M147T436   | 147.0283258 | 436.18  | 6478180.283 |
| M147T646   | 147.0276282 | 646.257 | 6552918.195 |
| M147T831   | 147.0277002 | 830.813 | 9571935.685 |
| M147T795   | 147.0276442 | 794.753 | 6491594.172 |
| M147T398   | 147.0284216 | 397.585 | 12596171.45 |
| M147T205   | 147.0283606 | 204.895 | 9385541.21  |
| M147T755   | 147.0276252 | 754.814 | 7136982.005 |
| M147T103   | 147.0277835 | 102.948 | 164059132.5 |
| M147T197   | 147.0276425 | 197.335 | 9650483.876 |
| M147T302   | 147.0276423 | 301.725 | 8136224.919 |
| M147T666   | 147.027633  | 666.058 | 5806822.192 |
| M147T172   | 147.0276363 | 171.546 | 11812799.9  |
| M147T697   | 147.027627  | 697.061 | 8394789.935 |
| M147T715   | 147.0276231 | 714.841 | 13244899.78 |
| M147T500   | 147.0276195 | 499.759 | 6890199.384 |
| M147T444   | 147.0284041 | 443.961 | 5934012.156 |
| M147T344   | 147.0283592 | 344.233 | 39599242.67 |
| M147T517   | 147.0276381 | 516.908 | 7714359.095 |
| M147T816   | 147.0276673 | 815.664 | 6061343.764 |
| M147T690_2 | 147.0276643 | 689.75  | 6413592.606 |
| M147T637   | 147.0276502 | 636.925 | 11528656.36 |
| M147T658   | 147.0276116 | 658.372 | 9023557.452 |
| M147T509   | 147.0276678 | 509.11  | 5838315.556 |
| M147T577   | 147.027626  | 576.787 | 30553395.95 |
| M147T161   | 147.0276284 | 161.184 | 12958524.08 |
| M147T469   | 147.0275937 | 468.69  | 10721975.43 |
| M147T487   | 147.0276143 | 487.329 | 10721711.78 |
| M147T738   | 147.0276343 | 737.955 | 5792904.595 |

|            |              |           |              |
|------------|--------------|-----------|--------------|
| M147T529   | 147. 0284105 | 529. 248  | 6680658. 788 |
| M147T235   | 147. 0276338 | 234. 972  | 11308973. 6  |
| M147T764   | 147. 0276731 | 764. 034  | 5945169. 664 |
| M147T804_2 | 147. 0276199 | 803. 615  | 6311692. 679 |
| M147T125   | 147. 027619  | 125. 274  | 14364981. 5  |
| M147T677   | 147. 027693  | 676. 878  | 9730417. 164 |
| M147T137   | 147. 0276163 | 137. 226  | 11466678. 58 |
| M147T773   | 147. 027647  | 773. 333  | 6024704. 355 |
| M147T327   | 147. 043434  | 327. 449  | 2930507. 653 |
| M147T84    | 147. 0396697 | 83. 9405  | 3172222. 133 |
| M147T462   | 147. 0435606 | 462. 446  | 2393349. 907 |
| M147T362   | 147. 0435398 | 362. 384  | 1292278. 593 |
| M147T575   | 147. 043251  | 575. 222  | 11658477. 04 |
| M147T121   | 147. 0647836 | 120. 945  | 13673489. 97 |
| M147T173   | 147. 0644149 | 173. 092  | 14798813. 46 |
| M147T104   | 147. 064768  | 104. 493  | 7875953. 492 |
| M147T146   | 147. 0642865 | 146. 08   | 34800067. 32 |
| M148T50    | 147. 9614164 | 50. 3393  | 97539. 42521 |
| M148T43_1  | 147. 9613826 | 42. 6358  | 167830. 8863 |
| M148T61    | 147. 9616228 | 61. 4369  | 468184. 512  |
| M148T779   | 147. 9615769 | 779. 407  | 1054795. 784 |
| M148T752   | 147. 961532  | 751. 766  | 1085968. 524 |
| M148T34    | 147. 9616503 | 34. 4117  | 467420. 5773 |
| M148T79    | 148. 0316454 | 79. 4105  | 9517807. 082 |
| M148T102   | 148. 0317983 | 101. 563  | 7755646. 088 |
| M148T52    | 148. 0420452 | 51. 9157  | 122734. 0765 |
| M148T187   | 148. 0413481 | 186. 689  | 3470420. 997 |
| M148T43_2  | 148. 0420224 | 42. 6358  | 854412. 6844 |
| M148T391   | 148. 0396921 | 391. 341  | 902810. 7561 |
| M148T128   | 148. 0416225 | 128. 279  | 18738472. 93 |
| M148T172   | 148. 0412861 | 171. 546  | 2426315. 036 |
| M148T65    | 148. 0420061 | 65. 0166  | 776057. 7049 |
| M148T591   | 148. 0394881 | 590. 717  | 727004. 8361 |
| M148T146   | 148. 0412384 | 146. 08   | 42568400. 75 |
| M148T575   | 148. 0470253 | 575. 222  | 978969. 4999 |
| M149T51    | 148. 9482043 | 51. 1275  | 188247. 908  |
| M149T63_1  | 148. 9481801 | 62. 7487  | 249879. 7697 |
| M149T43_1  | 148. 9482213 | 43. 1613  | 304057. 4297 |
| M149T85_1  | 148. 9482292 | 85. 0169  | 14545765. 89 |
| M149T114   | 148. 9483319 | 113. 762  | 4061570. 329 |
| M149T139   | 148. 9482619 | 138. 719  | 3608264. 681 |
| M149T36    | 148. 9481847 | 36. 0041  | 526584. 4735 |
| M149T46    | 148. 9686209 | 45. 79375 | 245806. 4923 |
| M149T60    | 148. 9686006 | 59. 8865  | 1432909. 163 |
| M149T766   | 148. 9696384 | 765. 588  | 4330723. 822 |
| M149T33    | 148. 9685903 | 32. 8715  | 770323. 8713 |
| M149T274_1 | 148. 9728102 | 273. 82   | 45927096. 14 |
| M149T591   | 148. 9705623 | 590. 717  | 561899. 622  |
| M149T779   | 148. 969541  | 779. 407  | 2054760. 904 |
| M149T712   | 148. 9686874 | 711. 794  | 2047960. 984 |
| M149T63_2  | 149. 0230687 | 62. 7487  | 2739805. 398 |
| M149T512   | 149. 0229989 | 512. 228  | 5480616. 758 |
| M149T43_2  | 149. 0230832 | 43. 1613  | 2876352. 704 |
| M149T337   | 149. 02325   | 336. 681  | 3026452. 298 |



|            |              |          |              |
|------------|--------------|----------|--------------|
| M149T489   | 149. 0230462 | 488. 885 | 5565280. 094 |
| M149T350   | 149. 0258232 | 350. 108 | 1529964. 627 |
| M149T274_2 | 149. 031468  | 273. 82  | 174419. 5778 |
| M149T173   | 149. 0258118 | 173. 092 | 9282683. 145 |
| M149T267   | 149. 0431998 | 266. 709 | 3086652. 507 |
| M149T272   | 149. 043206  | 271. 596 | 2141396. 927 |
| M149T279   | 149. 044184  | 278. 627 | 1431569. 459 |
| M149T284   | 149. 0432325 | 283. 634 | 4519463. 562 |
| M149T787   | 149. 0431865 | 787. 078 | 6349554. 585 |
| M149T480   | 149. 043227  | 479. 541 | 4720842. 024 |
| M149T124   | 149. 0432363 | 123. 792 | 11043546. 69 |
| M149T117   | 149. 0432193 | 116. 52  | 38248281. 97 |
| M149T709   | 149. 0431946 | 708. 697 | 6159005. 449 |
| M149T375   | 149. 043263  | 374. 746 | 3172145. 535 |
| M149T813   | 149. 0432262 | 812. 68  | 3566895. 45  |
| M149T557   | 149. 0432311 | 557. 078 | 5229833. 938 |
| M149T245   | 149. 0441595 | 245. 353 | 5578290. 416 |
| M149T770   | 149. 0432491 | 770. 235 | 7220875. 962 |
| M149T743   | 149. 0441833 | 742. 631 | 5459301. 065 |
| M149T158   | 149. 0431595 | 158. 1   | 6096981. 363 |
| M149T680   | 149. 0431875 | 679. 873 | 4397116. 788 |
| M149T449   | 149. 0443273 | 448. 527 | 5321980. 945 |
| M149T85_2  | 149. 0445679 | 85. 0169 | 81639613. 87 |
| M149T608   | 149. 0431724 | 607. 625 | 11376974. 98 |
| M149T543   | 149. 0442658 | 543. 216 | 4071977. 231 |
| M149T470   | 149. 0443094 | 470. 253 | 4028311. 772 |
| M149T136   | 149. 0432646 | 135. 795 | 14136046. 53 |
| M149T172   | 149. 0432515 | 171. 546 | 11438732. 94 |
| M149T93    | 149. 0431064 | 92. 9618 | 209370211. 1 |
| M149T568   | 149. 043149  | 567. 543 | 4866888. 224 |
| M149T688   | 149. 0432378 | 688. 189 | 4867943. 196 |
| M149T500   | 149. 0441819 | 499. 759 | 4136518. 07  |
| M149T321   | 149. 0432172 | 321. 312 | 4889681. 714 |
| M149T361   | 149. 0442821 | 360. 831 | 4782184. 091 |
| M149T396   | 149. 0432363 | 396. 023 | 4655134. 764 |
| M149T626   | 149. 0431933 | 626. 183 | 7049268. 341 |
| M149T720   | 149. 0432483 | 719. 505 | 5183277. 455 |
| M149T577   | 149. 0432337 | 576. 787 | 4197117. 296 |
| M149T697   | 149. 0432721 | 697. 061 | 3280699. 817 |
| M149T822   | 149. 0441656 | 821. 831 | 6322718. 574 |
| M149T258   | 149. 0441926 | 258. 208 | 5747484. 777 |
| M149T196   | 149. 0441985 | 195. 791 | 16852340. 21 |
| M149T151   | 149. 0442054 | 150. 528 | 8918280. 538 |
| M149T424   | 149. 0432552 | 423. 877 | 8931625. 803 |
| M149T732   | 149. 0432453 | 731. 793 | 4805716. 87  |
| M149T509   | 149. 0441741 | 509. 11  | 3227663. 846 |
| M149T294   | 149. 0432584 | 294. 152 | 3643352. 668 |
| M149T235   | 149. 0432125 | 234. 972 | 6911201. 075 |
| M149T340   | 149. 0442185 | 339. 772 | 9964994. 87  |
| M149T459   | 149. 0431989 | 459. 324 | 4670901. 04  |
| M149T804   | 149. 043231  | 803. 615 | 6607431. 26  |
| M149T387   | 149. 0443128 | 386. 78  | 5282862. 486 |
| M149T525   | 149. 0432295 | 524. 56  | 5481900. 538 |
| M149T220   | 149. 0442191 | 219. 979 | 7750228. 301 |

|            |             |         |             |
|------------|-------------|---------|-------------|
| M149T669   | 149.0582203 | 669.12  | 14066254.88 |
| M150T274   | 149.9754955 | 273.82  | 1743264.512 |
| M150T46    | 150.0003871 | 45.5006 | 280341.4389 |
| M150T52    | 150.0004192 | 51.9157 | 303731.3647 |
| M150T63    | 150.0004118 | 62.7487 | 742560.8158 |
| M150T33    | 150.0004154 | 32.8715 | 754990.3367 |
| M150T628   | 150.0004977 | 627.731 | 1555745.048 |
| M150T338   | 150.0182576 | 338.222 | 594606.6478 |
| M150T44    | 150.0181709 | 43.6868 | 98413.29341 |
| M150T179   | 150.0408361 | 179.046 | 48876164.47 |
| M150T94    | 150.0471411 | 94.1615 | 7368193.826 |
| M150T390   | 150.054545  | 389.839 | 5264425.609 |
| M150T335   | 150.054632  | 335.153 | 2682831.24  |
| M150T349   | 150.0546335 | 348.668 | 3946924.882 |
| M150T545   | 150.0540045 | 544.759 | 23199151.12 |
| M150T568   | 150.054613  | 567.543 | 1566069.766 |
| M150T534   | 150.0540254 | 533.931 | 3823189.215 |
| M150T517   | 150.0539177 | 516.908 | 6546667.071 |
| M150T294   | 150.0545011 | 294.152 | 2025452.187 |
| M150T158   | 150.0908007 | 158.1   | 267506.6785 |
| M151T85    | 150.945476  | 85.0169 | 6427341.28  |
| M151T128   | 150.9454327 | 128.279 | 3996025.164 |
| M151T274   | 150.9676895 | 273.82  | 4089808.274 |
| M151T272   | 150.9877241 | 272.312 | 43028.95963 |
| M151T163   | 151.0021561 | 162.615 | 2517513.027 |
| M151T63    | 151.0010738 | 62.7487 | 39393.47726 |
| M151T245_1 | 151.002185  | 244.891 | 381724.1713 |
| M151T190   | 151.0244281 | 189.717 | 26396847.18 |
| M151T267_1 | 151.0376785 | 266.709 | 1505050.274 |
| M151T262   | 151.0376937 | 262.302 | 1516297.43  |
| M151T279   | 151.037726  | 279.217 | 1424585.369 |
| M151T275   | 151.0377351 | 274.794 | 1807931.979 |
| M151T285   | 151.0376757 | 285.167 | 2196954.764 |
| M151T828   | 151.0381597 | 827.821 | 4646054.57  |
| M151T256   | 151.0377045 | 255.831 | 1671006.374 |
| M151T557   | 151.0377013 | 557.078 | 31419522.41 |
| M151T687   | 151.0381773 | 687.214 | 9446929.969 |
| M151T730   | 151.0381941 | 730.264 | 6794587.592 |
| M151T449   | 151.0377177 | 448.527 | 6469403.663 |
| M151T62    | 151.0385164 | 62.1587 | 8851820.908 |
| M151T598   | 151.0376208 | 598.341 | 26922312.48 |
| M151T710   | 151.0381454 | 710.246 | 4726395.914 |
| M151T197   | 151.0387142 | 197.335 | 8791052.286 |
| M151T234_1 | 151.0376935 | 233.519 | 4125590.255 |
| M151T206   | 151.0376663 | 206.399 | 5791945.534 |
| M151T741   | 151.0381978 | 741.077 | 4767119.23  |
| M151T246   | 151.037681  | 246.474 | 3258936.643 |
| M151T361   | 151.0377014 | 360.831 | 3640801.79  |
| M151T396   | 151.0377169 | 396.023 | 8337646.22  |
| M151T314   | 151.0377287 | 313.612 | 2414887.976 |
| M151T517   | 151.0376908 | 516.908 | 6633545.371 |
| M151T772   | 151.0382197 | 771.785 | 7837287.188 |
| M151T416   | 151.0376231 | 416.128 | 13876224.06 |
| M151T637   | 151.0382502 | 636.925 | 5285708.969 |

|            |              |           |              |
|------------|--------------|-----------|--------------|
| M151T611   | 151. 0382529 | 610. 742  | 9861679. 007 |
| M151T792   | 151. 0381909 | 791. 678  | 6228161. 453 |
| M151T759   | 151. 0381641 | 759. 428  | 3899607. 695 |
| M151T300   | 151. 0377415 | 300. 176  | 4429782. 917 |
| M151T438   | 151. 0377543 | 437. 734  | 5500068. 043 |
| M151T658   | 151. 0382549 | 658. 372  | 7291405. 058 |
| M151T467   | 151. 0376765 | 467. 127  | 14486324. 47 |
| M151T40    | 151. 038511  | 40. 4091  | 6968248. 162 |
| M151T486   | 151. 0377275 | 485. 784  | 12053637. 69 |
| M151T532_1 | 151. 0376786 | 532. 372  | 73770154. 83 |
| M151T378   | 151. 0376188 | 377. 64   | 5286772. 683 |
| M151T674_1 | 151. 0382058 | 673. 771  | 7863442. 059 |
| M151T804   | 151. 0381076 | 803. 615  | 4395630. 138 |
| M151T343   | 151. 0377936 | 342. 819  | 3577409. 701 |
| M151T575_1 | 151. 0381405 | 575. 222  | 8564554. 941 |
| M151T323   | 151. 0376995 | 322. 862  | 2830546. 598 |
| M151T835   | 151. 0381103 | 835. 329  | 3630306. 666 |
| M151T628   | 151. 0381106 | 627. 731  | 4441199. 638 |
| M151T334   | 151. 0377762 | 333. 655  | 3453100. 889 |
| M151T503   | 151. 0377325 | 502. 873  | 8213526. 118 |
| M151T814   | 151. 0381608 | 814. 118  | 4723856. 892 |
| M151T48    | 151. 0499536 | 47. 7826  | 239159. 6781 |
| M151T33    | 151. 0499552 | 32. 8715  | 600871. 4165 |
| M151T178_1 | 151. 0439917 | 177. 649  | 2416990. 533 |
| M151T43    | 151. 0499872 | 43. 4241  | 380621. 2468 |
| M151T61    | 151. 0499712 | 60. 9725  | 1855485. 2   |
| M151T268   | 151. 058324  | 268. 2535 | 8704492. 276 |
| M151T284   | 151. 0583489 | 283. 634  | 23937434. 45 |
| M151T278   | 151. 0583342 | 278. 267  | 12306690. 4  |
| M151T681   | 151. 0583348 | 681. 406  | 25747350. 84 |
| M151T311   | 151. 0583446 | 310. 626  | 76042943. 62 |
| M151T411   | 151. 0583511 | 411. 444  | 40285236. 94 |
| M151T245_2 | 151. 0583235 | 245. 353  | 22234683. 11 |
| M151T688   | 151. 0583682 | 688. 189  | 27213687. 2  |
| M151T436   | 151. 0583966 | 436. 18   | 30341514. 07 |
| M151T167   | 151. 0583458 | 167. 01   | 29195363. 24 |
| M151T188   | 151. 0583886 | 188. 174  | 20899251. 24 |
| M151T205   | 151. 0583681 | 204. 895  | 27020818. 92 |
| M151T609   | 151. 0583314 | 609. 19   | 48066977. 87 |
| M151T543   | 151. 058386  | 543. 216  | 7598977. 955 |
| M151T826   | 151. 0583513 | 826. 333  | 72300319. 15 |
| M151T234_2 | 151. 0583144 | 233. 519  | 33484046. 61 |
| M151T224   | 151. 0583188 | 224. 484  | 21503870. 79 |
| M151T217   | 151. 0583176 | 216. 95   | 28180607. 5  |
| M151T93    | 151. 0589744 | 92. 9618  | 50097577. 3  |
| M151T447   | 151. 05835   | 446. 967  | 22708182. 18 |
| M151T196   | 151. 058386  | 195. 791  | 25330801. 08 |
| M151T736   | 151. 0583248 | 736. 458  | 62494819. 89 |
| M151T476   | 151. 0583567 | 476. 451  | 69452411. 3  |
| M151T586   | 151. 0583563 | 586. 044  | 37445902. 99 |
| M151T372   | 151. 0583995 | 371. 633  | 28817328. 3  |
| M151T341   | 151. 0583404 | 341. 266  | 47667934. 32 |
| M151T697   | 151. 0583147 | 697. 061  | 32002991. 65 |
| M151T674_2 | 151. 058343  | 673. 771  | 25388636. 56 |

|            |              |          |              |
|------------|--------------|----------|--------------|
| M151T425   | 151. 0583085 | 425. 439 | 28964446. 64 |
| M151T509   | 151. 0583276 | 509. 11  | 64010176. 94 |
| M151T257   | 151. 0583222 | 257. 001 | 28970705. 69 |
| M151T712   | 151. 060713  | 711. 794 | 58563085. 14 |
| M151T154   | 151. 0583538 | 153. 601 | 38672758. 84 |
| M151T796   | 151. 0583804 | 796. 202 | 30217049. 23 |
| M151T552   | 151. 0583283 | 552. 493 | 41073748. 19 |
| M151T531   | 151. 058329  | 530. 804 | 22259690. 78 |
| M151T394   | 151. 0583819 | 394. 467 | 30051059. 38 |
| M151T575_2 | 151. 0583197 | 575. 222 | 44412653. 5  |
| M151T178_2 | 151. 0583952 | 177. 649 | 31625391. 39 |
| M151T359   | 151. 0583539 | 359. 297 | 31854213. 56 |
| M151T773   | 151. 0606795 | 773. 333 | 58690311. 8  |
| M151T137   | 151. 0583112 | 137. 226 | 43200931. 9  |
| M151T638   | 151. 0583335 | 638. 484 | 77200630. 77 |
| M151T267_2 | 151. 0750372 | 266. 709 | 288370. 1397 |
| M151T532_2 | 151. 0988833 | 532. 372 | 326704. 3972 |
| M152T447   | 152. 0330119 | 446. 967 | 84149000. 87 |
| M152T294   | 152. 0327723 | 294. 152 | 10306748. 43 |
| M152T707   | 152. 0331376 | 707. 143 | 5719251. 359 |
| M152T106   | 152. 0336854 | 105. 537 | 2665609. 693 |
| M152T684   | 152. 0336929 | 684. 499 | 4131609. 91  |
| M152T334   | 152. 0335617 | 333. 655 | 5473881. 101 |
| M152T59    | 152. 0431166 | 59. 2937 | 189646. 1448 |
| M152T65_1  | 152. 0431617 | 65. 0166 | 91994. 13278 |
| M152T43    | 152. 0444257 | 42. 6358 | 505000. 6019 |
| M152T598   | 152. 0421773 | 598. 341 | 1826016. 424 |
| M152T416   | 152. 0441609 | 416. 128 | 506555. 723  |
| M152T467   | 152. 0420821 | 467. 127 | 1294461. 794 |
| M152T532   | 152. 042169  | 532. 372 | 5476061. 521 |
| M152T199   | 152. 0417317 | 198. 821 | 419178. 0359 |
| M152T63    | 152. 0629965 | 63. 4462 | 905995. 3794 |
| M152T57    | 152. 0630613 | 57. 1362 | 796290. 7769 |
| M152T436   | 152. 0690955 | 436. 18  | 2281826. 962 |
| M152T71    | 152. 0630532 | 70. 607  | 815815. 5151 |
| M152T364   | 152. 0691456 | 363. 928 | 1602961. 054 |
| M152T394   | 152. 0691296 | 394. 467 | 15970007. 24 |
| M152T44    | 152. 0630482 | 43. 6868 | 2210166. 347 |
| M152T51    | 152. 081462  | 50. 6021 | 81718. 15162 |
| M152T42    | 152. 0814861 | 42. 3731 | 487784. 0655 |
| M152T65_2  | 152. 0814963 | 65. 0166 | 598550. 8435 |
| M153T36    | 152. 9765447 | 36. 0041 | 198341. 3981 |
| M153T53    | 152. 9764604 | 53. 1598 | 25786. 05008 |
| M153T86    | 152. 9943072 | 86. 3396 | 1591923. 933 |
| M153T102   | 153. 0183469 | 101. 563 | 93237335. 29 |
| M153T136   | 153. 0168931 | 135. 795 | 127339480. 9 |
| M153T109   | 153. 0168314 | 109. 475 | 103827875    |
| M153T444   | 153. 0183439 | 443. 961 | 14471876. 96 |
| M153T215   | 153. 0170104 | 215. 4   | 17454820. 53 |
| M153T235   | 153. 0167846 | 234. 972 | 20828729. 98 |
| M153T46    | 153. 0290127 | 46. 4105 | 156894. 6116 |
| M153T142   | 153. 0291365 | 141. 655 | 1512085. 308 |
| M153T62    | 153. 0289799 | 62. 1587 | 934288. 5284 |
| M153T31    | 153. 0290126 | 31. 4228 | 220021. 316  |

|            |              |          |              |
|------------|--------------|----------|--------------|
| M153T388   | 153. 053365  | 388. 326 | 37998995. 38 |
| M153T294   | 153. 0542011 | 294. 152 | 1791667. 261 |
| M153T350   | 153. 0653484 | 350. 108 | 4091620. 629 |
| M154T661   | 153. 8670781 | 661. 453 | 1528644. 663 |
| M154T724   | 153. 8671141 | 724. 158 | 1531574. 737 |
| M154T766_1 | 153. 8662652 | 765. 588 | 1959747. 578 |
| M154T741   | 153. 8670875 | 741. 077 | 1976261. 417 |
| M154T781   | 153. 8661827 | 780. 958 | 2574314. 633 |
| M154T798   | 153. 8662756 | 797. 757 | 2344935. 355 |
| M154T713   | 153. 8670902 | 713. 292 | 1785936. 344 |
| M154T825_1 | 153. 8662909 | 824. 864 | 1817035. 466 |
| M154T835_1 | 153. 866312  | 835. 329 | 1939874. 946 |
| M154T814   | 153. 8662671 | 814. 118 | 2907547. 557 |
| M154T753   | 153. 8661606 | 753. 315 | 2504662. 046 |
| M154T106   | 154. 0128257 | 105. 537 | 40063634. 74 |
| M154T817   | 154. 0123108 | 817. 214 | 1732544. 02  |
| M154T202   | 154. 0128048 | 201. 897 | 4550036. 903 |
| M154T766_2 | 154. 0122533 | 765. 588 | 14286190. 86 |
| M154T825_2 | 154. 0123374 | 824. 864 | 1874654. 912 |
| M154T324   | 154. 0120031 | 324. 413 | 7693976. 647 |
| M154T835_2 | 154. 0123899 | 835. 329 | 1887536. 946 |
| M154T136   | 154. 0211441 | 135. 795 | 8203223. 265 |
| M154T235   | 154. 0212518 | 234. 972 | 1308086. 311 |
| M154T158   | 154. 048364  | 158. 1   | 13199876. 11 |
| M154T215   | 154. 0487232 | 215. 4   | 3972985. 118 |
| M154T185   | 154. 048394  | 185. 252 | 55171567. 79 |
| M154T362   | 154. 0486797 | 362. 384 | 23436185. 95 |
| M154T146   | 154. 0493853 | 146. 08  | 6898773. 158 |
| M154T388   | 154. 0579127 | 388. 326 | 3088101. 498 |
| M154T124   | 154. 060678  | 123. 792 | 7956719. 923 |
| M154T111   | 154. 0606473 | 110. 926 | 6429997. 288 |
| M154T95    | 154. 0604354 | 95. 2383 | 4554296. 925 |
| M155T694   | 154. 9173209 | 694. 341 | 756614. 8724 |
| M155T293   | 154. 9970608 | 292. 621 | 6376980. 9   |
| M155T75    | 154. 9966694 | 74. 6705 | 5366919. 878 |
| M155T187   | 155. 0326047 | 186. 689 | 5474519. 983 |
| M155T299   | 155. 0326734 | 298. 619 | 4274376. 02  |
| M155T160   | 155. 0325881 | 159. 635 | 18738280. 88 |
| M155T411   | 155. 0335475 | 411. 444 | 1829099. 4   |
| M155T106   | 155. 03352   | 105. 537 | 6879523. 42  |
| M155T84    | 155. 0334159 | 83. 9405 | 16792700. 94 |
| M155T176   | 155. 0333868 | 176. 104 | 7382611. 702 |
| M155T185   | 155. 0528492 | 185. 252 | 3291511. 806 |
| M155T53    | 155. 0699242 | 52. 827  | 83936. 31111 |
| M155T40    | 155. 0699347 | 40. 4091 | 328739. 2291 |
| M155T67    | 155. 0700204 | 67. 1831 | 249050. 9914 |
| M155T522   | 155. 0699063 | 521. 5   | 682823. 5957 |
| M155T449   | 155. 0700585 | 448. 527 | 1030850. 062 |
| M155T31    | 155. 0699659 | 31. 4228 | 140265. 7336 |
| M155T635   | 155. 1427171 | 635. 37  | 860504. 6471 |
| M156T31    | 156. 0286283 | 31. 4228 | 286815. 0762 |
| M156T320   | 156. 0286584 | 319. 785 | 1509425. 326 |
| M156T235   | 156. 0287326 | 234. 972 | 1395714. 904 |
| M156T160   | 156. 0285963 | 159. 635 | 5611020. 96  |

|            |             |          |             |
|------------|-------------|----------|-------------|
| M156T106   | 156.0650269 | 105.537  | 7803943.108 |
| M156T226   | 156.0648066 | 225.965  | 6723878.02  |
| M156T293   | 156.0640875 | 292.621  | 11142859.36 |
| M156T237   | 156.0647958 | 236.518  | 8892371.439 |
| M156T146_1 | 156.0650975 | 146.08   | 6723364.134 |
| M156T303   | 156.0639838 | 303.259  | 11986456.1  |
| M156T114   | 156.0761109 | 113.762  | 31311130.76 |
| M156T146_2 | 156.0765774 | 146.08   | 77314884.52 |
| M156T125   | 156.0761233 | 125.274  | 29506358.74 |
| M156T413   | 156.1017257 | 413.006  | 493823.0628 |
| M156T331   | 156.1014762 | 330.552  | 288813.301  |
| M156T424   | 156.101548  | 423.877  | 379222.0866 |
| M157T87_1  | 156.9978954 | 87.426   | 6379159.853 |
| M157T87_2  | 157.0105161 | 87.426   | 122390380.7 |
| M157T82    | 157.0237048 | 81.8855  | 18752975.51 |
| M157T272   | 157.048341  | 272.312  | 19376634.43 |
| M157T205   | 157.049124  | 204.895  | 4957475.461 |
| M157T297   | 157.048447  | 297.149  | 10172188.8  |
| M157T164   | 157.0490098 | 164.077  | 5571453.527 |
| M157T231   | 157.0483365 | 230.507  | 7891881.014 |
| M157T121   | 157.0600764 | 120.945  | 23882976.66 |
| M157T106   | 157.0602757 | 105.537  | 33175797.27 |
| M157T193   | 157.0604555 | 192.769  | 180273.8083 |
| M157T54    | 157.0856319 | 54.2107  | 208236.2578 |
| M157T44    | 157.085642  | 43.65385 | 286593.1025 |
| M157T65    | 157.0856675 | 65.0166  | 534124.8742 |
| M157T69    | 157.085654  | 69.1983  | 506353.2832 |
| M157T472   | 157.0856826 | 471.768  | 2368789.615 |
| M157T514   | 157.0852184 | 513.768  | 4389055.649 |
| M157T33_1  | 157.0856244 | 32.8715  | 1073636.557 |
| M157T769   | 157.1218344 | 768.696  | 1218581.343 |
| M157T33_2  | 157.1218792 | 32.8715  | 652111.8908 |
| M158T187   | 158.0436585 | 186.689  | 2661154.974 |
| M158T223   | 158.0435813 | 222.943  | 5226233.5   |
| M158T147   | 158.0434857 | 147.455  | 2847994.163 |
| M158T107_1 | 158.0442281 | 106.648  | 9262385.512 |
| M158T98    | 158.0444307 | 97.682   | 31189544.71 |
| M158T215   | 158.0436829 | 215.4    | 3842566.484 |
| M158T83    | 158.0442194 | 82.8986  | 168789221   |
| M158T272   | 158.0526796 | 272.312  | 1252593.032 |
| M158T266   | 158.0795936 | 265.541  | 13446672.28 |
| M158T107_2 | 158.079636  | 106.648  | 9343111.939 |
| M158T337   | 158.0798137 | 336.681  | 14681381.02 |
| M158T324   | 158.0799264 | 324.413  | 11619955.78 |
| M158T128   | 158.0918654 | 128.279  | 11733523.59 |
| M158T106   | 158.0918882 | 105.537  | 2832513.485 |
| M159T112_1 | 158.9127467 | 112.287  | 2354063.178 |
| M159T255_1 | 158.9241817 | 255.113  | 4258921.815 |
| M159T163   | 158.9773625 | 162.615  | 160079683.1 |
| M159T253   | 158.9758215 | 252.703  | 24801024.84 |
| M159T100   | 158.9773813 | 100.283  | 157054368.4 |
| M159T375   | 158.9758578 | 374.746  | 14426510.27 |
| M159T315   | 158.9758271 | 315.162  | 20273311.25 |
| M159T246   | 158.9757279 | 246.013  | 31464108.12 |

|            |             |          |             |
|------------|-------------|----------|-------------|
| M159T540_1 | 158.9758179 | 540.152  | 11700323.65 |
| M159T568   | 158.9760123 | 567.543  | 8913687.619 |
| M159T196   | 158.9758697 | 195.791  | 83056513.7  |
| M159T185   | 158.9757295 | 185.252  | 60154040.19 |
| M159T90    | 158.9773473 | 89.8937  | 289553713.5 |
| M159T658   | 158.9759058 | 658.372  | 11868730.4  |
| M159T178   | 158.9758192 | 177.649  | 88118511.98 |
| M159T509_1 | 158.9758755 | 509.11   | 12687038.25 |
| M159T112_2 | 158.975797  | 112.287  | 504150618.8 |
| M159T282   | 158.9757372 | 281.942  | 55153836.71 |
| M159T323   | 158.9757769 | 322.862  | 14681028.62 |
| M159T220   | 158.9757326 | 219.979  | 177666655.5 |
| M159T677   | 158.9757352 | 676.878  | 7205365.529 |
| M159T554   | 158.9759822 | 554.027  | 12784474.67 |
| M159T385_1 | 158.975757  | 385.225  | 18771155.31 |
| M159T303   | 158.9760455 | 303.259  | 28980727.85 |
| M159T137   | 158.9773674 | 137.226  | 388516885.3 |
| M159T353   | 158.978313  | 353.163  | 20413499.47 |
| M159T66_1  | 158.9782986 | 66.2043  | 81421422.68 |
| M159T264_1 | 158.9783104 | 264.434  | 31600792.59 |
| M159T277   | 159.0274836 | 276.7105 | 1625635.02  |
| M159T623   | 159.0274197 | 623.098  | 8660629.839 |
| M159T645   | 159.0284689 | 644.722  | 4474285.157 |
| M159T455   | 159.0274823 | 454.645  | 6591003.108 |
| M159T433   | 159.0286449 | 433.06   | 4994024.905 |
| M159T82    | 159.0272841 | 81.8855  | 107937772.8 |
| M159T291   | 159.0275121 | 291.076  | 11011181.93 |
| M159T600   | 159.0274493 | 599.904  | 5333149.183 |
| M159T767   | 159.0284839 | 767.145  | 9615981.736 |
| M159T478   | 159.0274383 | 477.982  | 4349087.454 |
| M159T495   | 159.0285939 | 495.125  | 6168423.662 |
| M159T223   | 159.0273515 | 222.943  | 6592556.46  |
| M159T665   | 159.0274021 | 664.565  | 15989035.61 |
| M159T755   | 159.0274492 | 754.814  | 6178748.556 |
| M159T442   | 159.0286009 | 442.399  | 5779147.498 |
| M159T205_1 | 159.0274293 | 204.895  | 6437294.505 |
| M159T470   | 159.0273256 | 470.253  | 7052681.762 |
| M159T609_1 | 159.0274008 | 609.19   | 7149956.558 |
| M159T540_2 | 159.0273767 | 540.152  | 22631259.74 |
| M159T234   | 159.0273306 | 233.519  | 9749362.841 |
| M159T172   | 159.0272893 | 171.546  | 36679539.75 |
| M159T416   | 159.0274715 | 416.128  | 4261331.595 |
| M159T637   | 159.0274638 | 636.925  | 6086696.991 |
| M159T344   | 159.0285336 | 344.233  | 6928155.064 |
| M159T572   | 159.0285276 | 572.152  | 9994988.218 |
| M159T118   | 159.027429  | 117.954  | 21948677.56 |
| M159T487_1 | 159.0285429 | 487.329  | 4452293.765 |
| M159T214   | 159.0285136 | 213.897  | 7741210.002 |
| M159T255_2 | 159.027439  | 254.651  | 6550370.497 |
| M159T424   | 159.0273969 | 423.877  | 4985584.114 |
| M159T376   | 159.0274481 | 376.15   | 6655749.447 |
| M159T591   | 159.0274812 | 590.717  | 5709339.853 |
| M159T125   | 159.0275697 | 125.274  | 19088047.64 |
| M159T194   | 159.027303  | 194.243  | 22571779.88 |

|            |              |          |              |
|------------|--------------|----------|--------------|
| M159T308   | 159. 0273709 | 307. 616 | 11725287. 47 |
| M159T509_2 | 159. 0284677 | 509. 11  | 6410939. 69  |
| M159T700   | 159. 0274642 | 699. 592 | 5408902. 048 |
| M159T104   | 159. 0284426 | 104. 493 | 88239394. 64 |
| M159T712   | 159. 0274542 | 711. 794 | 5998273. 586 |
| M159T92    | 159. 0274848 | 91. 9113 | 31794873. 78 |
| M159T358   | 159. 0286698 | 357. 746 | 7348917. 315 |
| M159T146   | 159. 0276709 | 146. 08  | 28937344. 93 |
| M159T394_1 | 159. 0286406 | 394. 467 | 5938157. 937 |
| M159T405   | 159. 0274767 | 405. 254 | 5675134. 009 |
| M159T324   | 159. 0272981 | 324. 413 | 8364871. 724 |
| M159T735   | 159. 0274105 | 734. 901 | 6551409. 257 |
| M159T334   | 159. 0274863 | 333. 655 | 4769026. 764 |
| M159T264_2 | 159. 0275096 | 264. 434 | 5883864. 104 |
| M159T691   | 159. 0275202 | 691. 303 | 6647838. 851 |
| M159T814   | 159. 0274539 | 814. 118 | 27554053. 22 |
| M159T117   | 159. 042765  | 116. 52  | 3819974. 938 |
| M159T83    | 159. 0478457 | 82. 8986 | 8978010. 177 |
| M159T497   | 159. 063692  | 496. 646 | 8077291. 587 |
| M159T539   | 159. 0648704 | 538. 619 | 3425901. 178 |
| M159T413   | 159. 0650885 | 413. 006 | 11868796. 43 |
| M159T622   | 159. 0636928 | 621. 547 | 8261908. 099 |
| M159T456   | 159. 0651252 | 456. 2   | 8701457. 092 |
| M159T266   | 159. 063726  | 265. 541 | 5723329. 362 |
| M159T346   | 159. 0637614 | 345. 761 | 30068316. 31 |
| M159T706   | 159. 0637891 | 705. 593 | 11212770. 57 |
| M159T744   | 159. 0637021 | 744. 192 | 10361527. 3  |
| M159T226   | 159. 0642954 | 225. 965 | 9713875. 096 |
| M159T436   | 159. 0650902 | 436. 18  | 16996425. 7  |
| M159T520   | 159. 0637141 | 519. 998 | 9090247. 92  |
| M159T588   | 159. 0651065 | 587. 595 | 9459609. 228 |
| M159T373   | 159. 0651187 | 373. 196 | 9877595. 838 |
| M159T205_2 | 159. 0642929 | 204. 895 | 8864584. 39  |
| M159T598   | 159. 0651191 | 598. 341 | 9356928. 358 |
| M159T609_2 | 159. 063763  | 609. 19  | 12131014. 26 |
| M159T761   | 159. 0648881 | 760. 976 | 7236245. 83  |
| M159T179   | 159. 0643431 | 179. 046 | 8721705. 279 |
| M159T546   | 159. 0637688 | 546. 308 | 10552368. 12 |
| M159T297   | 159. 0648801 | 297. 149 | 9131145. 243 |
| M159T188   | 159. 0643111 | 188. 174 | 9481023. 82  |
| M159T473   | 159. 0637282 | 473. 329 | 8020778. 579 |
| M159T560   | 159. 0637191 | 560. 119 | 10286164. 83 |
| M159T258   | 159. 0637463 | 258. 208 | 12657008. 72 |
| M159T506   | 159. 0651126 | 505. 99  | 11508504. 91 |
| M159T305   | 159. 0648937 | 304. 743 | 8874526. 498 |
| M159T816   | 159. 0648854 | 815. 664 | 26648055. 78 |
| M159T720   | 159. 0637147 | 719. 505 | 9286404. 942 |
| M159T489   | 159. 0650541 | 488. 885 | 5666534. 179 |
| M159T285   | 159. 0637246 | 285. 167 | 10054623. 14 |
| M159T697   | 159. 0636977 | 697. 061 | 7722655. 743 |
| M159T577   | 159. 0636989 | 576. 787 | 8570899. 903 |
| M159T244   | 159. 0642727 | 243. 976 | 11528919. 3  |
| M159T629   | 159. 0648817 | 629. 272 | 5900284. 705 |
| M159T273   | 159. 0636802 | 273. 232 | 10719626. 45 |



|            |             |         |             |
|------------|-------------|---------|-------------|
| M159T215   | 159.0648465 | 215.4   | 9432398.992 |
| M159T531   | 159.0643103 | 530.804 | 7845470.402 |
| M159T394_2 | 159.0650744 | 394.467 | 13491864.22 |
| M159T678   | 159.0642448 | 678.416 | 18569996.13 |
| M159T640   | 159.0636969 | 640.057 | 13066675.08 |
| M159T784   | 159.0648827 | 784.051 | 8746575.588 |
| M159T657   | 159.0642042 | 656.84  | 17942010.28 |
| M159T385_2 | 159.0649019 | 385.225 | 8996606.746 |
| M159T733   | 159.0637418 | 733.352 | 11207748.84 |
| M159T773   | 159.0648875 | 773.333 | 8710851.723 |
| M159T160   | 159.0649468 | 159.635 | 18325472.49 |
| M159T155   | 159.0760885 | 155.033 | 1241956.6   |
| M159T53    | 159.0841145 | 53.4226 | 86528.73388 |
| M159T58    | 159.0841889 | 57.5134 | 128809.9887 |
| M159T46    | 159.0841372 | 46.1477 | 99565.8112  |
| M159T66_2  | 159.0841251 | 66.2043 | 219368.0064 |
| M159T264_3 | 159.0841751 | 264.434 | 933945.3954 |
| M159T128   | 159.0953094 | 128.279 | 570899.4084 |
| M159T487_2 | 159.1004348 | 487.329 | 8659444.263 |
| M159T404   | 159.1003868 | 403.698 | 8198274.044 |
| M159T475   | 159.1003687 | 474.888 | 23034754.29 |
| M160T36_1  | 159.892178  | 36.0041 | 208024.9281 |
| M160T50    | 159.9782162 | 50.3393 | 791996.2838 |
| M160T42    | 159.9781137 | 41.9901 | 981977.5794 |
| M160T60    | 159.9799256 | 59.8865 | 2427126.847 |
| M160T36_2  | 159.978203  | 36.0041 | 2731092.822 |
| M160T66    | 159.9781979 | 66.2043 | 5577289.53  |
| M160T100   | 159.9777788 | 100.283 | 13827252.5  |
| M160T164   | 159.9776353 | 164.077 | 17164401.3  |
| M160T90    | 159.9780352 | 89.8937 | 30405401.06 |
| M160T112   | 159.977548  | 112.287 | 56771319.61 |
| M160T137   | 159.9775277 | 137.226 | 44918495.49 |
| M160T82    | 160.0318903 | 81.8855 | 6803891.206 |
| M160T172   | 160.0330365 | 171.546 | 1913285.838 |
| M160T46    | 160.0416753 | 45.7661 | 115554.7269 |
| M160T54    | 160.0416459 | 53.6853 | 223708.6702 |
| M160T36_3  | 160.0418074 | 36.0041 | 212006.861  |
| M160T65    | 160.0392062 | 65.4825 | 468200.1223 |
| M160T609   | 160.0392272 | 609.19  | 1167826.277 |
| M160T464   | 160.0391396 | 464.011 | 1243580.173 |
| M160T483   | 160.0391894 | 482.656 | 1371598.789 |
| M160T597   | 160.0392695 | 596.795 | 1910207.259 |
| M160T91    | 160.0594537 | 90.9026 | 28187361.45 |
| M160T98    | 160.0595764 | 97.682  | 23920215.74 |
| M160T83    | 160.0593087 | 82.8986 | 11472883.87 |
| M160T125   | 160.0599024 | 125.274 | 8560127.93  |
| M160T52    | 160.0667174 | 51.9157 | 281805.6739 |
| M161T710   | 160.8404419 | 710.246 | 2113297.629 |
| M161T655   | 160.8404063 | 655.321 | 5266551.117 |
| M161T694   | 160.8406844 | 694.341 | 3348970.918 |
| M161T36_1  | 160.8912827 | 36.0041 | 184596.2571 |
| M161T810   | 160.9341631 | 809.797 | 1733384.115 |
| M161T778   | 160.9341934 | 777.92  | 1625101.144 |
| M161T835_1 | 160.9340937 | 835.329 | 1936810.646 |

|            |             |         |             |
|------------|-------------|---------|-------------|
| M161T43_1  | 160.9741545 | 43.3505 | 923503.9414 |
| M161T50    | 160.9732844 | 49.5511 | 3108743.345 |
| M161T54    | 160.9741678 | 54.2107 | 1076162.96  |
| M161T36_2  | 160.9748637 | 36.0041 | 3175955.826 |
| M161T176   | 160.9744978 | 176.104 | 11830271.57 |
| M161T136   | 160.9752902 | 135.795 | 52647816.58 |
| M161T98    | 160.9754765 | 97.682  | 23067467.75 |
| M161T90    | 160.9753916 | 89.8937 | 27131207.83 |
| M161T66    | 160.9747758 | 66.2043 | 9810075.714 |
| M161T161   | 160.9752642 | 161.184 | 20386853.49 |
| M161T112   | 160.9753095 | 112.287 | 69491197.31 |
| M161T61    | 161.0231014 | 61.4369 | 3512950.159 |
| M161T545   | 161.0218153 | 544.759 | 8485718.152 |
| M161T517_1 | 161.0230105 | 516.908 | 2544473.573 |
| M161T43_2  | 161.0231044 | 42.8986 | 3862286.528 |
| M161T272   | 161.045472  | 271.596 | 117621146.1 |
| M161T277   | 161.0453796 | 277.42  | 129993704   |
| M161T266   | 161.0454624 | 265.541 | 125183358.9 |
| M161T81    | 161.0424419 | 80.6174 | 219319832.4 |
| M161T580   | 161.0454224 | 579.883 | 325120536.8 |
| M161T433   | 161.0454974 | 433.06  | 247208446.7 |
| M161T539   | 161.0453566 | 538.619 | 397355327.4 |
| M161T411   | 161.0454874 | 411.444 | 368614733.3 |
| M161T600   | 161.0454133 | 599.904 | 248220278.5 |
| M161T767   | 161.0414048 | 767.145 | 541597185.1 |
| M161T557   | 161.0453687 | 557.078 | 358602910.4 |
| M161T349   | 161.0454611 | 348.668 | 560808826.5 |
| M161T472   | 161.0454176 | 471.768 | 247048896.2 |
| M161T253   | 161.0454676 | 252.703 | 228181178.8 |
| M161T205   | 161.0454188 | 204.895 | 260933334.3 |
| M161T107   | 161.0455847 | 106.648 | 1040840487  |
| M161T500   | 161.04537   | 499.759 | 197511428.2 |
| M161T688   | 161.0454234 | 688.189 | 317613933.9 |
| M161T826   | 161.0454761 | 826.333 | 557514833   |
| M161T724   | 161.0454115 | 724.158 | 1415085943  |
| M161T517_2 | 161.0454285 | 516.908 | 182983791.1 |
| M161T172   | 161.0455159 | 171.546 | 2415314602  |
| M161T444   | 161.0454416 | 443.961 | 245273900.1 |
| M161T285   | 161.0455018 | 285.167 | 251086869.7 |
| M161T321   | 161.0453718 | 321.312 | 231201088.6 |
| M161T508   | 161.0454105 | 507.55  | 187831858.4 |
| M161T332   | 161.0455041 | 332.105 | 237865370.4 |
| M161T811   | 161.0458451 | 811.292 | 1218866485  |
| M161T696   | 161.0453651 | 695.893 | 342440640.4 |
| M161T305_1 | 161.0453944 | 304.743 | 184964198.9 |
| M161T376   | 161.0455059 | 376.15  | 246862435.1 |
| M161T487   | 161.0454192 | 487.329 | 281754125.7 |
| M161T591   | 161.0453739 | 590.717 | 207622868.5 |
| M161T452   | 161.0454485 | 451.616 | 209557916.1 |
| M161T462   | 161.0454598 | 462.446 | 212816596.7 |
| M161T394   | 161.0455453 | 394.467 | 228157918.4 |
| M161T571   | 161.0454282 | 570.599 | 339164794.9 |
| M161T632   | 161.0454119 | 632.288 | 1571878818  |
| M161T525   | 161.0453771 | 524.56  | 224745768.3 |

|            |              |          |              |
|------------|--------------|----------|--------------|
| M161T387   | 161. 045445  | 386. 78  | 164684607. 7 |
| M161T235   | 161. 0453932 | 234. 972 | 757821526. 6 |
| M161T677   | 161. 0453963 | 676. 878 | 383135328. 4 |
| M161T95    | 161. 0424679 | 95. 2383 | 3645013408   |
| M161T835_2 | 161. 0424856 | 835. 329 | 473603518. 4 |
| M161T187   | 161. 0802528 | 186. 689 | 3265546. 436 |
| M161T243   | 161. 0802901 | 243. 386 | 3882550. 017 |
| M161T335   | 161. 0805471 | 335. 153 | 1355560. 951 |
| M161T226   | 161. 080257  | 225. 965 | 5390446. 008 |
| M161T305_2 | 161. 080485  | 304. 743 | 2350503. 552 |
| M161T173   | 161. 0803435 | 173. 092 | 3100442. 698 |
| M161T146   | 161. 0802694 | 146. 08  | 6551239. 032 |
| M161T834   | 161. 1118069 | 833. 866 | 2233495. 145 |
| M161T795   | 161. 1119431 | 794. 753 | 4164920. 563 |
| M161T94    | 161. 1102903 | 94. 1615 | 18871156. 06 |
| M161T732   | 161. 1118697 | 731. 793 | 1814614. 208 |
| M162T50    | 161. 9119434 | 50. 0766 | 310666. 5339 |
| M162T44    | 161. 9119313 | 44. 0652 | 628539. 5755 |
| M162T834   | 161. 9119463 | 833. 866 | 8914416. 655 |
| M162T817   | 161. 9119526 | 817. 214 | 8249898. 23  |
| M162T33    | 161. 9114383 | 32. 8715 | 2784416. 563 |
| M162T778   | 161. 911977  | 777. 92  | 5092991. 448 |
| M162T801   | 161. 9119575 | 800. 683 | 8635064. 062 |
| M162T64    | 161. 9119422 | 64. 0412 | 2125796. 381 |
| M162T51    | 162. 0179811 | 50. 8648 | 498565. 2507 |
| M162T31    | 162. 0179352 | 31. 4228 | 266826. 9536 |
| M162T253   | 162. 0479022 | 252. 703 | 16753350. 99 |
| M162T246   | 162. 048291  | 246. 474 | 7923149. 02  |
| M162T601   | 162. 0483341 | 601. 473 | 19606930. 92 |
| M162T81    | 162. 0472693 | 80. 6174 | 11831752. 55 |
| M162T433   | 162. 0484712 | 433. 06  | 14875113. 59 |
| M162T306   | 162. 0483157 | 306. 164 | 28602042. 64 |
| M162T828   | 162. 048351  | 827. 821 | 74339881. 52 |
| M162T557   | 162. 0478351 | 557. 078 | 15576588. 42 |
| M162T723   | 162. 0483063 | 722. 604 | 22465053. 82 |
| M162T415   | 162. 0479891 | 414. 571 | 11191937. 74 |
| M162T472   | 162. 0484039 | 471. 768 | 17059342. 37 |
| M162T807   | 162. 0457482 | 806. 698 | 147199878. 9 |
| M162T117   | 162. 0479279 | 116. 52  | 35300144. 57 |
| M162T147   | 162. 047288  | 147. 455 | 27201695. 09 |
| M162T356   | 162. 046062  | 356. 274 | 37558901. 29 |
| M162T578   | 162. 045876  | 578. 353 | 49222214. 73 |
| M162T449   | 162. 048037  | 448. 527 | 28669434. 38 |
| M162T205   | 162. 0478896 | 204. 895 | 54164399. 7  |
| M162T136   | 162. 0472882 | 135. 795 | 29475353. 1  |
| M162T500   | 162. 0480007 | 499. 759 | 17767683. 9  |
| M162T688   | 162. 048348  | 688. 189 | 21643970. 82 |
| M162T321   | 162. 0479141 | 321. 312 | 16806416. 58 |
| M162T332   | 162. 048027  | 332. 105 | 15603426. 03 |
| M162T285   | 162. 0459714 | 285. 167 | 17903972. 46 |
| M162T675   | 162. 0483649 | 675. 322 | 26944387. 03 |
| M162T376   | 162. 0480336 | 376. 15  | 14194470. 43 |
| M162T424   | 162. 0479898 | 423. 877 | 13600078. 81 |
| M162T658   | 162. 0483017 | 658. 372 | 41363264. 82 |

|            |              |          |              |
|------------|--------------|----------|--------------|
| M162T732   | 162. 0483483 | 731. 793 | 22328964. 12 |
| M162T632   | 162. 0483098 | 632. 288 | 52759042. 16 |
| M162T529   | 162. 0478879 | 529. 248 | 47573661. 14 |
| M162T489   | 162. 0483861 | 488. 885 | 27397526. 15 |
| M162T235   | 162. 0478942 | 234. 972 | 22815201. 99 |
| M162T700   | 162. 0484381 | 699. 592 | 29736587. 19 |
| M162T169   | 162. 0460826 | 168. 507 | 18674066. 56 |
| M162T407   | 162. 0478894 | 406. 813 | 15183272     |
| M162T394   | 162. 0479897 | 394. 467 | 15164679. 44 |
| M162T125   | 162. 0479478 | 125. 274 | 25852078. 16 |
| M162T276   | 162. 0483267 | 276. 104 | 14999245     |
| M162T713   | 162. 0483128 | 713. 292 | 24368857. 23 |
| M162T385   | 162. 0479951 | 385. 225 | 10481536. 66 |
| M162T95    | 162. 0473098 | 95. 2383 | 236165259. 3 |
| M162T264   | 162. 0483892 | 264. 434 | 13071273. 56 |
| M162T160   | 162. 0484857 | 159. 635 | 23692481. 14 |
| M162T346   | 162. 0657088 | 345. 761 | 1759273. 374 |
| M163T715   | 162. 8375233 | 714. 841 | 2221787. 028 |
| M163T740   | 162. 837443  | 739. 509 | 932887. 8814 |
| M163T753   | 162. 8374651 | 753. 315 | 840423. 6175 |
| M163T151   | 162. 9014786 | 150. 528 | 3519993. 179 |
| M163T33    | 162. 9124152 | 32. 8715 | 286063. 6152 |
| M163T835_1 | 162. 9120761 | 835. 329 | 626617. 2048 |
| M163T829   | 162. 9375188 | 829. 321 | 1775245. 202 |
| M163T835_2 | 162. 9376042 | 835. 329 | 1126665. 213 |
| M163T795   | 162. 937634  | 794. 753 | 2017105. 604 |
| M163T819   | 162. 9376035 | 818. 743 | 2087457. 568 |
| M163T752   | 162. 937413  | 751. 766 | 1942101. 531 |
| M163T804   | 162. 93745   | 803. 615 | 2758539. 05  |
| M163T784   | 162. 9375541 | 784. 051 | 2404456. 543 |
| M163T746   | 162. 9384767 | 745. 747 | 1369939. 572 |
| M163T709   | 162. 9384459 | 708. 697 | 1984113. 716 |
| M163T693   | 162. 9384519 | 692. 781 | 2076058. 303 |
| M163T726   | 162. 9384435 | 725. 713 | 1511023. 832 |
| M163T764   | 162. 9384458 | 764. 034 | 3618192. 032 |
| M163T735   | 162. 9384385 | 734. 901 | 1962800. 852 |
| M163T86    | 162. 9554345 | 86. 3396 | 8496792. 994 |
| M163T341   | 162. 9698502 | 341. 266 | 459480. 8231 |
| M163T49    | 163. 0011974 | 49. 0256 | 113011. 3121 |
| M163T40    | 163. 0021413 | 40. 4091 | 299015. 5965 |
| M163T61    | 163. 0013115 | 61. 4369 | 576935. 9365 |
| M163T31    | 163. 0020931 | 31. 4228 | 130614. 7216 |
| M163T78    | 163. 0227594 | 78. 2661 | 150169102. 6 |
| M163T314   | 163. 0399462 | 313. 612 | 4826795. 607 |
| M163T444   | 163. 0378535 | 443. 961 | 5339314. 943 |
| M163T340_1 | 163. 0376547 | 339. 772 | 118567067    |
| M163T407   | 163. 0381793 | 406. 813 | 7165747. 997 |
| M163T418   | 163. 0377051 | 417. 689 | 4452061. 847 |
| M163T617   | 163. 0384357 | 616. 891 | 14586998. 63 |
| M163T643   | 163. 0489698 | 643. 166 | 2002864. 977 |
| M163T743   | 163. 0489348 | 742. 631 | 4454807. 915 |
| M163T730   | 163. 048902  | 730. 264 | 2532100. 259 |
| M163T766   | 163. 0492884 | 765. 588 | 10478707. 71 |
| M163T683   | 163. 0488951 | 682. 948 | 6939125. 229 |

|            |              |           |              |
|------------|--------------|-----------|--------------|
| M163T811   | 163. 0495629 | 811. 292  | 9141790. 735 |
| M163T796   | 163. 0489532 | 796. 202  | 7032320. 922 |
| M163T657   | 163. 0489264 | 656. 84   | 5126529. 983 |
| M163T713   | 163. 0492486 | 713. 292  | 3946053. 846 |
| M163T95    | 163. 0484707 | 95. 2383  | 37511709. 24 |
| M163T835_3 | 163. 0489796 | 835. 329  | 4268278. 285 |
| M163T50    | 163. 0596507 | 50. 33925 | 304873. 3661 |
| M163T103   | 163. 0595989 | 102. 948  | 20461959. 24 |
| M163T66    | 163. 059623  | 66. 2043  | 3135154. 284 |
| M163T91    | 163. 0598086 | 90. 9026  | 20100146. 41 |
| M163T34    | 163. 0596245 | 34. 4117  | 2095130. 468 |
| M163T340_2 | 163. 105991  | 339. 772  | 672258. 6821 |
| M164T36    | 163. 9497984 | 36. 0041  | 467456. 7413 |
| M164T258_1 | 163. 9650594 | 258. 208  | 308280. 504  |
| M164T326   | 164. 0012248 | 325. 901  | 1024711. 881 |
| M164T365   | 164. 0329072 | 365. 475  | 4055925. 424 |
| M164T387   | 164. 0329709 | 386. 78   | 2614579. 966 |
| M164T681   | 164. 0338627 | 681. 406  | 1647888. 06  |
| M164T317   | 164. 0337041 | 316. 709  | 5244146. 117 |
| M164T652   | 164. 0338399 | 652. 285  | 1683400. 678 |
| M164T258_2 | 164. 0333472 | 258. 208  | 71851477. 34 |
| M164T407   | 164. 0330554 | 406. 813  | 2382447. 168 |
| M164T442   | 164. 0420893 | 442. 399  | 458462. 8652 |
| M164T340   | 164. 0424452 | 339. 772  | 10075321. 08 |
| M164T617   | 164. 0421684 | 616. 891  | 1247233. 344 |
| M164T327_1 | 164. 0692255 | 327. 449  | 210614745. 5 |
| M164T655   | 164. 0700437 | 655. 321  | 4861444. 158 |
| M164T629   | 164. 0700333 | 629. 272  | 5405177. 229 |
| M164T343   | 164. 0707282 | 342. 819  | 18479033. 24 |
| M164T327_2 | 164. 1377787 | 327. 449  | 944067. 8532 |
| M165T509   | 164. 8345939 | 509. 11   | 434290. 3587 |
| M165T85    | 164. 9258584 | 85. 0169  | 3346121. 249 |
| M165T115   | 164. 9257703 | 115. 123  | 7582664. 334 |
| M165T137   | 164. 9334675 | 137. 226  | 1073012. 072 |
| M165T45    | 164. 9460614 | 44. 72645 | 115384. 1273 |
| M165T52_1  | 164. 946074  | 51. 9157  | 100699. 6593 |
| M165T63    | 164. 9460229 | 62. 7487  | 509721. 4697 |
| M165T33_1  | 164. 9460178 | 32. 8715  | 689008. 5728 |
| M165T146   | 164. 9669599 | 146. 08   | 2892446. 353 |
| M165T98    | 164. 9847353 | 97. 682   | 33377334. 72 |
| M165T362_1 | 164. 9850591 | 362. 384  | 250284. 1785 |
| M165T632   | 165. 0001659 | 632. 288  | 1001875. 161 |
| M165T601   | 165. 0166859 | 601. 473  | 3408228. 529 |
| M165T253   | 165. 0166873 | 252. 703  | 3790288. 986 |
| M165T643   | 165. 0187467 | 643. 166  | 3424935. 957 |
| M165T663   | 165. 0166906 | 663. 008  | 5281796. 319 |
| M165T272   | 165. 0166652 | 272. 312  | 2645624. 509 |
| M165T121   | 165. 0179679 | 120. 945  | 5653403. 729 |
| M165T346   | 165. 0188145 | 345. 761  | 8738726. 671 |
| M165T755   | 165. 01886   | 754. 814  | 3117814. 623 |
| M165T436   | 165. 0189004 | 436. 18   | 17773929. 93 |
| M165T246   | 165. 0166714 | 246. 013  | 5194747. 423 |
| M165T609   | 165. 0187435 | 609. 19   | 3183455. 448 |
| M165T635   | 165. 0166639 | 635. 37   | 3033712. 834 |

|            |             |         |             |
|------------|-------------|---------|-------------|
| M165T655   | 165.0188006 | 655.321 | 3683375.895 |
| M165T790   | 165.0187057 | 790.161 | 3613580.21  |
| M165T776_1 | 165.0188914 | 776.391 | 5530318.873 |
| M165T473_1 | 165.0189091 | 473.329 | 7308089.089 |
| M165T715   | 165.0187837 | 714.841 | 8674904.402 |
| M165T504   | 165.016666  | 504.432 | 13270648.79 |
| M165T626   | 165.0167904 | 626.183 | 3519338.888 |
| M165T388   | 165.0188785 | 388.326 | 6667692.99  |
| M165T736   | 165.0166602 | 736.458 | 6713259.089 |
| M165T361   | 165.0189048 | 360.831 | 7200093.621 |
| M165T376   | 165.0188307 | 376.15  | 3775714.071 |
| M165T574   | 165.0188231 | 573.704 | 12515615.6  |
| M165T235   | 165.0166735 | 234.972 | 15783683.7  |
| M165T152   | 165.017934  | 152.08  | 3459563.969 |
| M165T690   | 165.0167726 | 689.75  | 4410341.173 |
| M165T804   | 165.0188731 | 803.615 | 4906978.769 |
| M165T698   | 165.0166835 | 698.034 | 3255911.283 |
| M165T618   | 165.0167301 | 618.45  | 2991002.708 |
| M165T531_1 | 165.0167111 | 530.804 | 6479942.155 |
| M165T678   | 165.0167106 | 678.416 | 5544507.31  |
| M165T762   | 165.0166865 | 762.482 | 3537754.423 |
| M165T407   | 165.017884  | 406.813 | 7561573.592 |
| M165T296   | 165.0188539 | 295.704 | 39339360.74 |
| M165T264_1 | 165.0167386 | 264.434 | 6883644.327 |
| M165T825_1 | 165.0187628 | 824.864 | 2882910.595 |
| M165T218   | 165.0167238 | 218.43  | 38365313.16 |
| M165T835_1 | 165.0186794 | 835.329 | 2670001.167 |
| M165T461   | 165.0188641 | 460.89  | 5469794.717 |
| M165T50    | 165.0289068 | 50.3393 | 27623.20755 |
| M165T665   | 165.0377806 | 664.565 | 10592637.94 |
| M165T697   | 165.037709  | 697.061 | 10971432.54 |
| M165T825_2 | 165.037622  | 824.864 | 111930333.9 |
| M165T124   | 165.0395058 | 123.792 | 14130452.88 |
| M165T770   | 165.0395813 | 770.235 | 39928050.96 |
| M165T84    | 165.03999   | 83.9405 | 430417890.8 |
| M165T744   | 165.0395448 | 744.192 | 20180479.2  |
| M165T94    | 165.0396039 | 94.1615 | 56484957.79 |
| M165T172   | 165.0380927 | 171.546 | 29351822.17 |
| M165T688   | 165.0395794 | 688.189 | 15510039.52 |
| M165T134   | 165.039604  | 134.253 | 16658874.86 |
| M165T716   | 165.039541  | 716.391 | 28695146.47 |
| M165T657   | 165.0395627 | 656.84  | 14989349.32 |
| M165T677   | 165.0380386 | 676.878 | 18776191.34 |
| M165T264_2 | 165.0396065 | 264.434 | 14793360.48 |
| M165T564   | 165.0395567 | 564.487 | 14796522.21 |
| M165T776_2 | 165.0529683 | 776.391 | 20599380.73 |
| M165T710   | 165.0528759 | 710.246 | 11714066.68 |
| M165T826   | 165.0529686 | 826.333 | 9380593.968 |
| M165T801   | 165.0529304 | 800.683 | 8649428.512 |
| M165T735   | 165.0529937 | 734.901 | 15635859.11 |
| M165T835_2 | 165.052874  | 835.329 | 6481807.278 |
| M165T814   | 165.0529219 | 814.118 | 6769538.061 |
| M165T753   | 165.0529123 | 753.315 | 8883141.259 |
| M165T583   | 165.0531708 | 582.96  | 10552589.39 |

|            |              |           |              |
|------------|--------------|-----------|--------------|
| M165T455   | 165. 0531452 | 454. 645  | 12601389. 66 |
| M165T577   | 165. 0531089 | 576. 787  | 9808236. 86  |
| M165T248   | 165. 0531172 | 247. 773  | 8408882. 203 |
| M165T203   | 165. 0531623 | 203. 346  | 11727603. 17 |
| M165T625   | 165. 0531463 | 624. 642  | 14833304. 77 |
| M165T277   | 165. 0531548 | 276. 825  | 8437396. 955 |
| M165T212   | 165. 0531569 | 212. 366  | 16414370. 61 |
| M165T442   | 165. 0548233 | 442. 399  | 17434443. 9  |
| M165T266   | 165. 0530967 | 265. 541  | 6870942. 308 |
| M165T427   | 165. 0540724 | 426. 913  | 16929778. 16 |
| M165T686   | 165. 0531535 | 686. 047  | 29059053. 39 |
| M165T473_2 | 165. 053156  | 473. 329  | 14065333. 15 |
| M165T284   | 165. 0532376 | 283. 634  | 9064873. 003 |
| M165T234   | 165. 0531213 | 233. 519  | 16460676. 74 |
| M165T556   | 165. 0533506 | 555. 524  | 17250869. 03 |
| M165T568   | 165. 053149  | 567. 543  | 12302748. 7  |
| M165T321   | 165. 0531084 | 321. 312  | 18439803. 59 |
| M165T666   | 165. 0531241 | 666. 058  | 11771477. 62 |
| M165T396   | 165. 0531795 | 396. 023  | 12713653. 75 |
| M165T466   | 165. 053159  | 465. 575  | 10973915. 88 |
| M165T720   | 165. 0529147 | 719. 505  | 9791180. 928 |
| M165T652   | 165. 0531369 | 652. 285  | 15216334. 28 |
| M165T257   | 165. 0531087 | 257. 001  | 6441173. 703 |
| M165T612   | 165. 0531475 | 612. 3    | 16907440. 01 |
| M165T597   | 165. 0531319 | 596. 795  | 15583925. 87 |
| M165T408   | 165. 0531329 | 408. 368  | 11058655. 09 |
| M165T362_2 | 165. 0540534 | 362. 384  | 56700293. 43 |
| M165T378_1 | 165. 0531    | 377. 64   | 23972912. 94 |
| M165T531_2 | 165. 0531059 | 530. 804  | 26553494. 72 |
| M165T501   | 165. 0531139 | 501. 318  | 22913065. 95 |
| M165T343   | 165. 0531948 | 342. 819  | 11490504. 02 |
| M165T303   | 165. 05412   | 303. 259  | 15498036. 26 |
| M165T638   | 165. 0531096 | 638. 484  | 14448407. 68 |
| M165T52_2  | 165. 0653169 | 52. 14375 | 142744. 1565 |
| M165T44    | 165. 0653191 | 43. 6868  | 179273. 1527 |
| M165T60    | 165. 0653154 | 60. 4002  | 516995. 9447 |
| M165T167   | 165. 0653185 | 167. 01   | 1443065. 979 |
| M165T33_2  | 165. 0653029 | 32. 8715  | 346849. 0143 |
| M165T69    | 165. 0653589 | 69. 1983  | 521504. 8668 |
| M165T327   | 165. 0725627 | 327. 449  | 19289423. 62 |
| M165T344   | 165. 0736574 | 344. 233  | 1442286. 755 |
| M165T378_2 | 165. 0654455 | 377. 64   | 2076446. 545 |
| M166T683   | 165. 9774868 | 682. 948  | 970100. 2712 |
| M166T49_1  | 166. 0131199 | 49. 4197  | 92441. 18995 |
| M166T55    | 166. 0131992 | 54. 68115 | 149239. 2938 |
| M166T42    | 166. 0131138 | 42. 23715 | 127946. 238  |
| M166T65    | 166. 013178  | 65. 4825  | 477066. 2658 |
| M166T31    | 166. 0131624 | 31. 4228  | 391926. 3302 |
| M166T442   | 166. 0244539 | 442. 399  | 175180. 2645 |
| M166T540   | 166. 0257851 | 540. 152  | 495560. 9953 |
| M166T405   | 166. 0213138 | 405. 254  | 542027. 81   |
| M166T218   | 166. 021207  | 218. 43   | 2918801. 054 |
| M166T259   | 166. 0398186 | 259. 134  | 594960. 98   |
| M166T163   | 166. 04943   | 162. 615  | 7423864. 122 |

|           |              |          |              |
|-----------|--------------|----------|--------------|
| M166T145  | 166. 0494119 | 144. 706 | 6611842. 096 |
| M166T355  | 166. 0493201 | 354. 719 | 15428253. 82 |
| M166T379  | 166. 0493852 | 379. 066 | 7568771. 897 |
| M166T109  | 166. 0495998 | 109. 475 | 13103605. 43 |
| M166T632  | 166. 049528  | 632. 288 | 3015150. 402 |
| M166T424  | 166. 0493595 | 423. 877 | 3348397. 719 |
| M166T459  | 166. 0493844 | 459. 324 | 3486508. 418 |
| M166T137  | 166. 0494209 | 137. 226 | 6268763. 553 |
| M166T334  | 166. 0494847 | 333. 655 | 3756294. 096 |
| M166T557  | 166. 0576782 | 557. 078 | 1618357. 19  |
| M166T50   | 166. 0577189 | 50. 3393 | 204697. 0165 |
| M166T43   | 166. 0591539 | 42. 8986 | 946695. 5202 |
| M166T61   | 166. 059177  | 60. 9725 | 1369940. 983 |
| M166T49_2 | 166. 0591963 | 48. 7629 | 227470. 1171 |
| M166T327  | 166. 0746185 | 327. 449 | 530595. 9472 |
| M166T512  | 166. 0861112 | 512. 228 | 264757. 8351 |
| M166T466  | 166. 0860258 | 465. 575 | 747806. 9062 |
| M166T452  | 166. 0855866 | 451. 616 | 2446073. 644 |
| M167T56   | 166. 9229205 | 56. 0676 | 79039. 6845  |
| M167T121  | 166. 9228755 | 120. 945 | 1751203. 493 |
| M167T43   | 166. 9228895 | 42. 6358 | 895380. 6519 |
| M167T65   | 166. 92284   | 65. 4825 | 575034. 3    |
| M167T134  | 166. 9228745 | 134. 253 | 2700835. 3   |
| M167T237  | 166. 9829352 | 236. 518 | 220918. 4705 |
| M167T122  | 167. 0101619 | 122. 381 | 10556741. 82 |
| M167T369  | 167. 0326694 | 368. 559 | 16303945. 58 |
| M167T500  | 167. 0330238 | 499. 759 | 8596034. 8   |
| M167T243  | 167. 0346075 | 243. 386 | 17724458. 32 |
| M167T534  | 167. 0340237 | 533. 931 | 6321119. 477 |
| M167T462  | 167. 0353901 | 462. 446 | 8728577. 115 |
| M167T108  | 167. 0335849 | 108. 082 | 4328602. 281 |
| M167T293  | 167. 0444404 | 292. 621 | 7904871. 205 |
| M167T95   | 167. 0548671 | 95. 2383 | 5349915. 475 |
| M167T539  | 167. 0699883 | 538. 619 | 557506. 8226 |
| M167T229  | 167. 0699632 | 228. 961 | 644601. 3437 |
| M167T444  | 167. 0698438 | 443. 961 | 1548814. 332 |
| M168T710  | 167. 8351792 | 710. 246 | 2811540. 983 |
| M168T724  | 167. 835058  | 724. 158 | 3138333. 424 |
| M168T772  | 167. 8351718 | 771. 785 | 9968987. 358 |
| M168T801  | 167. 8351456 | 800. 683 | 5433152. 988 |
| M168T835  | 167. 8351859 | 835. 329 | 1733912. 964 |
| M168T814  | 167. 835187  | 814. 118 | 2484047. 948 |
| M168T47   | 167. 9302495 | 46. 6732 | 220618. 0803 |
| M168T42   | 167. 9302891 | 42. 3731 | 502321. 9744 |
| M168T51   | 167. 9302455 | 51. 3902 | 460890. 1995 |
| M168T58   | 167. 9302251 | 58. 1047 | 267527. 7423 |
| M168T64   | 167. 9302998 | 64. 0412 | 563574. 7538 |
| M168T655  | 167. 9302221 | 655. 321 | 1679461. 449 |
| M168T31   | 167. 9302711 | 31. 4228 | 955119. 6264 |
| M168T697  | 167. 9302304 | 697. 061 | 1465888. 092 |
| M168T264  | 168. 0112875 | 264. 434 | 111135. 8705 |
| M168T327  | 168. 0288365 | 327. 449 | 1260703. 368 |
| M168T635  | 168. 0288012 | 635. 37  | 1529061. 529 |
| M168T401  | 168. 0287849 | 400. 641 | 1228845. 87  |



|            |             |          |             |
|------------|-------------|----------|-------------|
| M168T215   | 168.0284074 | 215.4    | 7648841.625 |
| M168T343   | 168.0288085 | 342.819  | 802455.239  |
| M168T243   | 168.0369361 | 243.386  | 1306023.289 |
| M168T369   | 168.0371    | 368.559  | 1180990.476 |
| M168T462   | 168.0370518 | 462.446  | 444144.819  |
| M168T532   | 168.0368168 | 532.372  | 525858.3153 |
| M168T293   | 168.0481418 | 292.621  | 547912.865  |
| M168T167   | 168.0650298 | 167.01   | 10051947.9  |
| M168T251   | 168.0650038 | 251.004  | 9717025.801 |
| M168T188   | 168.0649961 | 188.174  | 4046392.972 |
| M168T344   | 168.0648664 | 344.233  | 2750497.313 |
| M168T274   | 168.0639665 | 273.82   | 2087798.05  |
| M168T332   | 168.0638413 | 332.105  | 3012575.582 |
| M168T294   | 168.065037  | 294.152  | 28622810.17 |
| M168T154   | 168.0652348 | 153.601  | 2719815.645 |
| M168T211   | 168.0651259 | 210.883  | 8536573.779 |
| M169T140   | 168.8348313 | 140.209  | 1873998.315 |
| M169T229   | 168.8337159 | 228.961  | 86288910.09 |
| M169T277   | 168.8348139 | 277.42   | 68010065.21 |
| M169T252_1 | 168.8348235 | 251.727  | 26576818.13 |
| M169T480_1 | 168.9880136 | 479.541  | 738906.6532 |
| M169T329   | 169.0128003 | 328.999  | 1362763.467 |
| M169T119   | 169.0072091 | 119.413  | 2023298.04  |
| M169T379   | 169.0128424 | 379.066  | 1494328.893 |
| M169T131   | 169.0073404 | 131.207  | 1043171.159 |
| M169T91    | 169.0127512 | 90.9026  | 21888624.68 |
| M169T308   | 169.0128204 | 307.616  | 1510100.321 |
| M169T364   | 169.0128351 | 363.928  | 1336508.284 |
| M169T407   | 169.0128283 | 406.813  | 633026.9483 |
| M169T184   | 169.0138195 | 183.708  | 1998607.42  |
| M169T215   | 169.0323222 | 215.4    | 425345.6382 |
| M169T267   | 169.0490947 | 267.169  | 1394085.524 |
| M169T107   | 169.0492423 | 106.648  | 1780622.927 |
| M169T302   | 169.0491363 | 301.725  | 1964274.013 |
| M169T197   | 169.0490691 | 197.335  | 5804788.272 |
| M169T172   | 169.049211  | 171.546  | 4314939.302 |
| M169T332   | 169.0492898 | 332.105  | 1727135.075 |
| M169T155   | 169.049132  | 155.033  | 3579106.212 |
| M169T323   | 169.0493362 | 322.862  | 1581051.905 |
| M169T218   | 169.0490676 | 218.43   | 6651866.499 |
| M169T52    | 169.0603228 | 52.14365 | 60240.55405 |
| M169T44    | 169.0603914 | 44.4091  | 116954.6955 |
| M169T61    | 169.0603271 | 60.9725  | 214036.4154 |
| M169T67    | 169.0603653 | 67.1831  | 170846.9221 |
| M169T33    | 169.0606758 | 32.8715  | 364126.4246 |
| M169T294   | 169.0685164 | 294.152  | 2216182.979 |
| M169T252_2 | 169.0685743 | 251.727  | 552840.7325 |
| M169T480_2 | 169.0855618 | 479.541  | 2091133.211 |
| M169T504   | 169.0852726 | 504.432  | 7699699.575 |
| M169T688   | 169.0856104 | 688.189  | 2246580.982 |
| M169T461   | 169.085549  | 460.89   | 3093080.197 |
| M170T724   | 169.8326442 | 724.158  | 10870518.65 |
| M170T816   | 169.8324652 | 815.664  | 4268671.525 |
| M170T799   | 169.8324223 | 799.306  | 4350755.193 |

|          |              |          |              |
|----------|--------------|----------|--------------|
| M170T764 | 169. 8325808 | 764. 034 | 3070961. 806 |
| M170T677 | 169. 8325278 | 676. 878 | 2967010. 853 |
| M170T835 | 169. 8326237 | 835. 329 | 1852302. 474 |
| M170T753 | 169. 8326106 | 753. 315 | 3183894. 497 |
| M170T255 | 169. 9902471 | 254. 651 | 1279789. 688 |
| M170T181 | 170. 0442869 | 180. 601 | 7842899. 392 |
| M170T106 | 170. 0443963 | 105. 537 | 1658310. 38  |
| M170T158 | 170. 0444362 | 158. 1   | 4930920. 666 |
| M170T193 | 170. 0443687 | 192. 769 | 5816721. 616 |
| M170T365 | 170. 0444603 | 365. 475 | 1901111. 828 |
| M170T312 | 170. 0444237 | 312. 058 | 1708930. 578 |
| M170T375 | 170. 0809951 | 374. 746 | 5006435. 747 |
| M170T302 | 170. 0806275 | 301. 725 | 720832. 1142 |
| M170T321 | 170. 0805172 | 321. 312 | 1980385. 98  |
| M171T254 | 170. 7600329 | 253. 674 | 165386. 0751 |
| M171T229 | 170. 8318777 | 228. 961 | 123905727. 2 |
| M171T139 | 170. 8318299 | 138. 719 | 2467044. 474 |
| M171T277 | 170. 8318811 | 277. 42  | 106903309. 8 |
| M171T252 | 170. 8318961 | 251. 727 | 52758227. 58 |
| M171T81  | 171. 0048178 | 80. 6174 | 27833489. 62 |
| M171T232 | 171. 0106424 | 231. 973 | 739067. 4478 |
| M171T119 | 171. 0285311 | 119. 413 | 3738102. 016 |
| M171T227 | 171. 0284658 | 227. 421 | 6352846. 823 |
| M171T267 | 171. 0285098 | 266. 709 | 1505278. 499 |
| M171T106 | 171. 0286903 | 105. 537 | 4050238. 423 |
| M171T84  | 171. 0287499 | 83. 9405 | 3102280. 762 |
| M171T147 | 171. 0285002 | 147. 455 | 4252084. 289 |
| M171T197 | 171. 0284374 | 197. 335 | 2377724. 533 |
| M171T185 | 171. 0286294 | 185. 252 | 933406. 347  |
| M171T169 | 171. 0285491 | 168. 507 | 1717573. 82  |
| M171T89  | 171. 0396736 | 88. 8247 | 1256437. 215 |
| M171T335 | 171. 0657734 | 335. 153 | 12567814. 17 |
| M171T127 | 171. 0647565 | 126. 755 | 1590040. 797 |
| M171T421 | 171. 0658302 | 420. 799 | 13792907. 03 |
| M171T444 | 171. 0650309 | 443. 961 | 3654758. 563 |
| M171T173 | 171. 0648453 | 173. 092 | 3920239. 105 |
| M171T258 | 171. 0646039 | 258. 208 | 5477825. 607 |
| M171T115 | 171. 0648374 | 115. 123 | 1480814. 496 |
| M171T146 | 171. 0648557 | 146. 08  | 3788932. 792 |
| M171T296 | 171. 0649955 | 295. 704 | 7902246. 124 |
| M171T312 | 171. 0647984 | 312. 058 | 2735158. 853 |
| M171T51  | 171. 0759311 | 50. 6021 | 71121. 03279 |
| M171T37  | 171. 0759049 | 37. 4486 | 248203. 4182 |
| M171T65  | 171. 0759687 | 65. 0166 | 335096. 6119 |
| M171T107 | 171. 0758999 | 106. 648 | 1793994. 786 |
| M171T787 | 171. 1012418 | 787. 078 | 2952577. 435 |
| M171T498 | 171. 1011598 | 498. 202 | 5743911. 736 |
| M171T557 | 171. 1010239 | 557. 078 | 3228601. 069 |
| M171T834 | 171. 1012307 | 833. 866 | 2572008. 427 |
| M171T464 | 171. 1011344 | 464. 011 | 5405584. 133 |
| M171T772 | 171. 1011119 | 771. 785 | 2880123. 958 |
| M171T756 | 171. 1012471 | 756. 343 | 2191244. 873 |
| M171T571 | 171. 1011029 | 570. 599 | 4965897. 958 |
| M171T484 | 171. 1008813 | 484. 221 | 12059537. 82 |

|            |              |          |              |
|------------|--------------|----------|--------------|
| M171T738   | 171. 101165  | 737. 955 | 2073879. 909 |
| M171T726   | 171. 1012134 | 725. 713 | 1963007. 407 |
| M171T528   | 171. 1009464 | 527. 688 | 14398767. 72 |
| M171T819   | 171. 1377723 | 818. 743 | 1927210. 52  |
| M172T249   | 171. 8326714 | 249. 466 | 3027329. 829 |
| M172T723   | 171. 8300477 | 722. 604 | 2456301. 366 |
| M172T834   | 171. 8300987 | 833. 866 | 563047. 0863 |
| M172T817   | 171. 8300848 | 817. 214 | 1953269. 267 |
| M172T229   | 171. 8327922 | 228. 961 | 5464772. 603 |
| M172T710   | 171. 8300028 | 710. 246 | 1399326. 126 |
| M172T688   | 171. 8299616 | 688. 189 | 1316389. 417 |
| M172T740   | 171. 8301616 | 739. 509 | 1836364. 563 |
| M172T778   | 171. 8300856 | 777. 92  | 4743173. 557 |
| M172T277   | 171. 8328901 | 277. 42  | 5029228. 922 |
| M172T799   | 171. 8301484 | 799. 306 | 2224427. 156 |
| M172T261   | 171. 8328347 | 261. 138 | 1478787. 571 |
| M172T677   | 171. 8299615 | 676. 878 | 1011614. 667 |
| M172T65    | 171. 9092313 | 65. 0166 | 124379. 8291 |
| M172T36    | 171. 9091088 | 36. 0041 | 407571. 8525 |
| M172T253   | 171. 9454499 | 252. 703 | 2389745. 478 |
| M172T244   | 171. 9454454 | 243. 976 | 994303. 8053 |
| M172T279   | 171. 9454311 | 278. 627 | 2853955. 543 |
| M172T235   | 171. 9454423 | 234. 972 | 2077382. 209 |
| M172T220   | 171. 9454241 | 219. 979 | 798280. 0338 |
| M172T48    | 171. 9455721 | 47. 9808 | 76301. 92309 |
| M172T41    | 171. 9455924 | 41. 3907 | 278443. 9642 |
| M172T62    | 171. 9455363 | 62. 1587 | 1124872. 106 |
| M172T299   | 172. 0196078 | 298. 619 | 1417386. 505 |
| M172T51    | 172. 0220277 | 51. 1275 | 33223. 47036 |
| M172T63    | 172. 0220093 | 63. 4462 | 166762. 4725 |
| M172T40    | 172. 022093  | 40. 4091 | 222088. 53   |
| M172T87_1  | 172. 0212904 | 87. 426  | 14440222. 73 |
| M172T217   | 172. 0235703 | 216. 95  | 448187. 1123 |
| M172T106_1 | 172. 0600702 | 105. 537 | 6551837. 887 |
| M172T87_2  | 172. 0601009 | 87. 426  | 16619739. 85 |
| M172T146   | 172. 0600872 | 146. 08  | 3075206. 621 |
| M172T191   | 172. 0601495 | 191. 259 | 3100272. 308 |
| M172T170   | 172. 060135  | 170. 049 | 4615262. 04  |
| M172T118   | 172. 0715001 | 117. 954 | 30121064. 3  |
| M172T257   | 172. 0680632 | 257. 001 | 356732. 7857 |
| M172T106_2 | 172. 0712784 | 105. 537 | 21098294. 1  |
| M172T145   | 172. 0965443 | 144. 706 | 4533441. 706 |
| M172T203   | 172. 0965345 | 203. 346 | 16609735. 85 |
| M172T353   | 172. 0970214 | 353. 163 | 6540906. 818 |
| M172T157   | 172. 0965251 | 156. 582 | 6836060. 412 |
| M172T364   | 172. 097044  | 363. 928 | 11054146. 16 |
| M172T484   | 172. 1047338 | 484. 221 | 1170474. 109 |
| M172T528   | 172. 1045633 | 527. 688 | 1296707. 537 |
| M173T140   | 172. 8290554 | 140. 209 | 995721. 2567 |
| M173T272   | 172. 8282133 | 272. 312 | 13694507. 23 |
| M173T251   | 172. 8290422 | 251. 004 | 46755367. 92 |
| M173T229   | 172. 8290284 | 228. 961 | 66053657. 92 |
| M173T133   | 172. 8291042 | 132. 707 | 555096. 5559 |
| M173T282   | 172. 8281473 | 281. 942 | 21569368. 41 |

|            |              |          |              |
|------------|--------------|----------|--------------|
| M173T84_1  | 172. 970893  | 83. 9405 | 3852995. 098 |
| M173T79    | 173. 0077622 | 79. 4105 | 786086203. 1 |
| M173T106_1 | 173. 0077214 | 105. 537 | 5600364. 237 |
| M173T253   | 173. 0086606 | 252. 703 | 4939381. 866 |
| M173T350   | 173. 0077223 | 350. 108 | 2452333. 672 |
| M173T175   | 173. 0077281 | 174. 576 | 11287266. 77 |
| M173T146_1 | 173. 0077737 | 146. 08  | 6030464. 863 |
| M173T106_2 | 173. 0448023 | 105. 537 | 26181408. 5  |
| M173T84_2  | 173. 0432519 | 83. 9405 | 1039287240   |
| M173T96    | 173. 0431652 | 96. 4922 | 24785855. 33 |
| M173T146_2 | 173. 0431281 | 146. 08  | 15370780. 46 |
| M173T125   | 173. 0431529 | 125. 274 | 24158780. 74 |
| M173T178   | 173. 0431709 | 177. 649 | 6436126. 871 |
| M173T353_1 | 173. 0801146 | 353. 163 | 3211740. 767 |
| M173T288   | 173. 080011  | 287. 981 | 26411071. 94 |
| M173T353_2 | 173. 1011072 | 353. 163 | 716454. 2902 |
| M173T102   | 173. 1025519 | 101. 563 | 55318044. 94 |
| M173T197   | 173. 1027471 | 197. 335 | 2450438. 062 |
| M173T90    | 173. 1024926 | 89. 8937 | 684679369. 3 |
| M173T111   | 173. 1025157 | 110. 926 | 45348386. 52 |
| M173T364   | 173. 1011347 | 363. 928 | 1031281. 344 |
| M173T497   | 173. 1166094 | 496. 646 | 1469753. 77  |
| M173T537   | 173. 1167076 | 537. 051 | 2835339. 406 |
| M173T545   | 173. 1166137 | 544. 759 | 3140760. 186 |
| M173T514   | 173. 116685  | 513. 768 | 2348733. 253 |
| M173T84_3  | 173. 1192423 | 83. 9405 | 5140123. 664 |
| M173T464   | 173. 1165175 | 464. 011 | 15008576. 88 |
| M173T484   | 173. 1165657 | 484. 221 | 2274440. 351 |
| M173T554   | 173. 1165696 | 554. 027 | 6594555. 107 |
| M174T253   | 173. 8297567 | 252. 703 | 4384322. 687 |
| M174T229   | 173. 8297276 | 228. 961 | 3943714. 211 |
| M174T277   | 173. 8297479 | 277. 42  | 4555780. 655 |
| M174T220   | 173. 8298111 | 219. 979 | 1686394. 277 |
| M174T79_1  | 174. 0109189 | 79. 4105 | 47116858. 48 |
| M174T176   | 174. 0113664 | 176. 104 | 239901. 8093 |
| M174T79_2  | 174. 0392211 | 79. 4105 | 4534377. 261 |
| M174T709   | 174. 055249  | 708. 697 | 20268640. 49 |
| M174T540   | 174. 054653  | 540. 152 | 11892670. 8  |
| M174T606   | 174. 0547017 | 606. 096 | 1107740. 058 |
| M174T106   | 174. 0758073 | 105. 537 | 13708674. 89 |
| M174T193   | 174. 075627  | 192. 769 | 884016. 4284 |
| M174T288   | 174. 0840568 | 287. 981 | 2051046. 231 |
| M174T91    | 174. 0871068 | 90. 9026 | 384836576. 3 |
| M174T90    | 174. 1063329 | 89. 8937 | 37719695. 21 |
| M174T554   | 174. 1204089 | 554. 027 | 504526. 2302 |
| M175T229   | 174. 8273186 | 228. 961 | 32665325. 99 |
| M175T262   | 174. 8272263 | 262. 302 | 6814317. 763 |
| M175T277   | 174. 827314  | 277. 42  | 24703636. 46 |
| M175T34    | 174. 8276433 | 34. 4117 | 180303. 9244 |
| M175T124   | 174. 8788489 | 123. 792 | 7969913. 072 |
| M175T601   | 174. 9520566 | 601. 473 | 53450841. 02 |
| M175T182   | 174. 9517935 | 182. 156 | 190033044. 3 |
| M175T770   | 174. 9524378 | 770. 235 | 19455028. 5  |
| M175T831   | 174. 9528305 | 830. 813 | 4541333. 658 |

|            |              |          |              |
|------------|--------------|----------|--------------|
| M175T266   | 174. 9518923 | 265. 541 | 146133749. 1 |
| M175T473   | 174. 9517095 | 473. 329 | 118318904. 3 |
| M175T655   | 174. 9520268 | 655. 321 | 74920354. 63 |
| M175T224   | 174. 9516766 | 224. 484 | 953921756. 9 |
| M175T388   | 174. 9520392 | 388. 326 | 367177594. 1 |
| M175T631   | 174. 9520675 | 630. 737 | 112684036. 8 |
| M175T811   | 174. 9525186 | 811. 292 | 5738574. 059 |
| M175T792   | 174. 9525246 | 791. 678 | 14314008. 77 |
| M175T161   | 174. 9520776 | 161. 184 | 294848477. 5 |
| M175T347   | 174. 9520365 | 347. 166 | 230066532. 3 |
| M175T574   | 174. 9517628 | 573. 704 | 131898257. 8 |
| M175T501   | 174. 9522694 | 501. 318 | 89139562. 47 |
| M175T691   | 174. 9518538 | 691. 303 | 82215731. 31 |
| M175T727   | 174. 9565352 | 727. 22  | 79939018. 02 |
| M175T275   | 174. 956552  | 274. 794 | 128453575. 3 |
| M175T283   | 174. 9565287 | 282. 659 | 227404884    |
| M175T444   | 174. 9565238 | 443. 961 | 237292126. 6 |
| M175T509   | 174. 9565007 | 509. 11  | 58042655. 03 |
| M175T90    | 174. 9550865 | 89. 8937 | 76789421. 6  |
| M175T118   | 174. 9546092 | 117. 954 | 1517931368   |
| M175T424_1 | 174. 9565337 | 423. 877 | 106502023. 9 |
| M175T320   | 174. 9565403 | 319. 785 | 541632835. 4 |
| M175T364   | 174. 9565198 | 363. 928 | 141150365. 6 |
| M175T532   | 174. 9565394 | 532. 372 | 242994628. 1 |
| M175T200   | 175. 0053338 | 200. 362 | 148526. 7982 |
| M175T106_1 | 175. 0233661 | 105. 537 | 21986656. 98 |
| M175T147   | 175. 0237834 | 147. 455 | 2064490. 731 |
| M175T75    | 175. 0233423 | 74. 6705 | 24882767. 85 |
| M175T83    | 175. 0238284 | 82. 8986 | 22061186. 8  |
| M175T92    | 175. 0233527 | 91. 9113 | 25736586. 84 |
| M175T324   | 175. 0234467 | 324. 413 | 1648405. 835 |
| M175T82    | 175. 0347312 | 81. 8855 | 168065711. 8 |
| M175T511   | 175. 0386274 | 510. 673 | 470137. 4159 |
| M175T716   | 175. 0386292 | 716. 391 | 405259. 2466 |
| M175T592   | 175. 0388364 | 592. 284 | 1036214. 785 |
| M175T119   | 175. 0595685 | 119. 413 | 44475456. 09 |
| M175T709   | 175. 0582551 | 708. 697 | 2005052. 513 |
| M175T106_2 | 175. 0596992 | 105. 537 | 25190521. 87 |
| M175T173   | 175. 0592078 | 173. 092 | 79207047. 27 |
| M175T146   | 175. 0599811 | 146. 08  | 19573438. 23 |
| M175T91    | 175. 0904411 | 90. 9026 | 21274423. 69 |
| M175T405   | 175. 0951771 | 405. 254 | 33815956. 95 |
| M175T349   | 175. 0960131 | 348. 668 | 3191437. 089 |
| M175T288   | 175. 0961177 | 287. 981 | 1503688. 183 |
| M175T424_2 | 175. 0960293 | 423. 877 | 11459816. 01 |
| M175T278   | 175. 0960892 | 278. 267 | 1647330. 103 |
| M176T161   | 175. 957604  | 161. 184 | 9528659. 083 |
| M176T118   | 175. 9579776 | 117. 954 | 46896791. 5  |
| M176T51    | 175. 9672417 | 50. 602  | 135875. 9853 |
| M176T40    | 175. 9672184 | 40. 4091 | 1230731. 935 |
| M176T64    | 175. 9673577 | 64. 0412 | 1649511. 074 |
| M176T46    | 176. 0340193 | 46. 4105 | 179709. 6881 |
| M176T82    | 176. 0381015 | 81. 8855 | 7926655. 33  |
| M176T33    | 176. 0339838 | 32. 8715 | 99758. 93353 |

|            |             |          |             |
|------------|-------------|----------|-------------|
| M176T583   | 176.0339596 | 582.96   | 2197429.259 |
| M176T217   | 176.0370473 | 216.95   | 892324.4366 |
| M176T59    | 176.0340116 | 58.8277  | 780380.7827 |
| M176T571   | 176.0340611 | 570.599  | 864928.5424 |
| M176T503   | 176.0340639 | 502.873  | 1702358.262 |
| M176T196   | 176.0453238 | 195.791  | 233939.2625 |
| M176T84    | 176.0544558 | 83.9405  | 43632578.98 |
| M176T92    | 176.0544712 | 91.9113  | 9947548.731 |
| M176T119   | 176.0631631 | 119.413  | 2491315.701 |
| M176T478   | 176.0704537 | 477.982  | 645099.1079 |
| M176T109   | 176.0632697 | 109.475  | 892290.9265 |
| M176T175   | 176.0632505 | 174.576  | 5599248.02  |
| M176T146   | 176.0630512 | 146.08   | 1107346.783 |
| M176T394   | 176.0815178 | 394.467  | 177483.6659 |
| M176T405   | 176.0995623 | 405.254  | 2646150.505 |
| M177T270   | 176.824508  | 270.3655 | 1646047.47  |
| M177T253   | 176.8246366 | 252.703  | 1943868.435 |
| M177T259_1 | 176.82452   | 259.134  | 2913929.067 |
| M177T229_1 | 176.8247089 | 228.961  | 8248419.341 |
| M177T280   | 176.8263673 | 280.275  | 2934353.429 |
| M177T77    | 176.9154601 | 77.2263  | 17387605.63 |
| M177T119   | 176.9508475 | 119.413  | 9001287.816 |
| M177T723   | 177.0177726 | 722.604  | 5402019.635 |
| M177T709   | 177.0177486 | 708.697  | 7732873.168 |
| M177T472   | 177.0193918 | 471.768  | 26314874.77 |
| M177T730   | 177.0177146 | 730.264  | 4622645.115 |
| M177T556   | 177.0180088 | 555.524  | 8128897.083 |
| M177T671   | 177.0177708 | 670.674  | 4833891.639 |
| M177T655   | 177.0179934 | 655.321  | 8225107.597 |
| M177T811   | 177.017848  | 811.292  | 6515467.398 |
| M177T740   | 177.0177576 | 739.509  | 6810624.619 |
| M177T778   | 177.0177635 | 777.92   | 9010083.027 |
| M177T820   | 177.018076  | 820.294  | 5503465.613 |
| M177T678   | 177.0179899 | 678.416  | 5411109.015 |
| M177T574   | 177.0177455 | 573.704  | 10398824.16 |
| M177T764   | 177.0177274 | 764.034  | 8594902.554 |
| M177T798   | 177.0178456 | 797.757  | 6164722.574 |
| M177T835_1 | 177.0180878 | 835.329  | 6250641.964 |
| M177T753   | 177.0177473 | 753.315  | 5168885.069 |
| M177T691   | 177.0177232 | 691.303  | 4450030.749 |
| M177T746   | 177.0376028 | 745.747  | 9759624.25  |
| M177T732   | 177.0378026 | 731.793  | 12621283.35 |
| M177T275   | 177.0396071 | 274.794  | 5535285.331 |
| M177T279   | 177.0397073 | 279.217  | 3481703.477 |
| M177T254   | 177.0396023 | 253.674  | 6302388.956 |
| M177T259_2 | 177.0396636 | 259.134  | 7424210.462 |
| M177T79    | 177.038992  | 79.4105  | 40816055.95 |
| M177T537   | 177.0396461 | 537.051  | 7292446.958 |
| M177T433   | 177.0397641 | 433.06   | 5694304.032 |
| M177T600   | 177.0397451 | 599.904  | 11137257.07 |
| M177T267   | 177.0397096 | 266.709  | 5597170.108 |
| M177T121   | 177.0403115 | 120.945  | 152136466.2 |
| M177T545   | 177.039741  | 544.759  | 7363145.751 |
| M177T625   | 177.0396013 | 624.642  | 9164160.693 |

|            |              |          |              |
|------------|--------------|----------|--------------|
| M177T349   | 177. 0397888 | 348. 668 | 10941615. 08 |
| M177T649   | 177. 039552  | 649. 195 | 6730610. 897 |
| M177T495   | 177. 0397689 | 495. 125 | 7065814. 276 |
| M177T106   | 177. 0389397 | 105. 537 | 343431933. 2 |
| M177T687   | 177. 0396997 | 687. 214 | 11171481. 26 |
| M177T704   | 177. 039642  | 704. 046 | 7399172. 421 |
| M177T608   | 177. 0397604 | 607. 625 | 8978552. 592 |
| M177T449   | 177. 0397999 | 448. 527 | 5656387. 212 |
| M177T391   | 177. 0402231 | 391. 341 | 42826725. 53 |
| M177T755   | 177. 0395907 | 754. 814 | 8325239. 745 |
| M177T697   | 177. 0397636 | 697. 061 | 7974003. 868 |
| M177T229_2 | 177. 0397228 | 228. 961 | 27969994     |
| M177T826   | 177. 0397282 | 826. 333 | 9719209. 642 |
| M177T470   | 177. 0397215 | 470. 253 | 18723183. 69 |
| M177T441   | 177. 0397854 | 440. 833 | 8224681. 889 |
| M177T326   | 177. 0397353 | 325. 901 | 10074935. 54 |
| M177T286   | 177. 0397966 | 286. 433 | 8144442. 087 |
| M177T577   | 177. 0397863 | 576. 787 | 9335844. 911 |
| M177T569   | 177. 0396597 | 569. 091 | 8064865. 858 |
| M177T586   | 177. 0397065 | 586. 044 | 8691637. 357 |
| M177T675   | 177. 039672  | 675. 322 | 10957045. 75 |
| M177T149   | 177. 0398136 | 148. 981 | 31444150. 81 |
| M177T294   | 177. 0398041 | 294. 152 | 9403773. 8   |
| M177T518   | 177. 0397713 | 518. 474 | 10999931. 53 |
| M177T634   | 177. 0395329 | 633. 832 | 14002365. 91 |
| M177T529   | 177. 0397148 | 529. 248 | 6921201. 41  |
| M177T658   | 177. 0397536 | 658. 372 | 10369579. 12 |
| M177T308   | 177. 0395866 | 307. 616 | 11533342. 62 |
| M177T718   | 177. 0396665 | 717. 942 | 15504921. 47 |
| M177T133   | 177. 0389491 | 132. 707 | 65503822. 83 |
| M177T362   | 177. 0397434 | 362. 384 | 7917749. 526 |
| M177T552   | 177. 0401592 | 552. 493 | 12670542. 5  |
| M177T340   | 177. 039742  | 339. 772 | 11763757. 47 |
| M177T200   | 177. 0390073 | 200. 362 | 24792337. 91 |
| M177T169   | 177. 0397985 | 168. 507 | 19250447. 66 |
| M177T503   | 177. 0396132 | 502. 873 | 11900093. 87 |
| M177T617   | 177. 0397555 | 616. 891 | 7243011. 397 |
| M177T835_2 | 177. 0396937 | 835. 329 | 6955599. 817 |
| M177T520   | 177. 0542854 | 519. 998 | 2921142. 434 |
| M177T595   | 177. 054059  | 595. 35  | 8838098. 818 |
| M177T609   | 177. 054319  | 609. 19  | 2050446. 904 |
| M177T642   | 177. 0541218 | 641. 603 | 1502433. 068 |
| M177T568   | 177. 0543173 | 567. 543 | 1375640. 041 |
| M177T534   | 177. 0543705 | 533. 931 | 2060589. 084 |
| M177T618   | 177. 054156  | 618. 45  | 940829. 1988 |
| M177T677   | 177. 0542683 | 676. 878 | 1779183. 67  |
| M177T628   | 177. 054079  | 627. 731 | 1132527. 515 |
| M177T375   | 177. 0655432 | 374. 746 | 724049. 2514 |
| M178T121   | 178. 0424679 | 120. 945 | 9595763. 766 |
| M178T106   | 178. 0423114 | 105. 537 | 19593608. 98 |
| M178T199   | 178. 0423727 | 198. 821 | 958621. 6302 |
| M178T353   | 178. 0500591 | 353. 163 | 4058450. 954 |
| M178T89    | 178. 0706542 | 88. 8247 | 12591025. 17 |
| M178T729   | 178. 0859252 | 728. 711 | 1079380. 973 |

|            |              |          |              |
|------------|--------------|----------|--------------|
| M178T291   | 178. 085972  | 291. 076 | 3708439. 917 |
| M178T706   | 178. 0853565 | 705. 593 | 6240472. 131 |
| M178T744   | 178. 0854325 | 744. 192 | 4764743. 699 |
| M178T686   | 178. 0858985 | 686. 047 | 1963798. 605 |
| M179T272   | 178. 8243048 | 272. 312 | 54748. 28854 |
| M179T118   | 178. 9474845 | 117. 954 | 28463030. 9  |
| M179T290_1 | 178. 9554978 | 289. 534 | 403353. 8067 |
| M179T94    | 178. 9767243 | 94. 1615 | 37596053. 29 |
| M179T33    | 178. 9928885 | 32. 8715 | 397614. 3318 |
| M179T422   | 179. 0325392 | 422. 362 | 3675270. 433 |
| M179T552   | 179. 032543  | 552. 493 | 4309482. 664 |
| M179T450   | 179. 0326092 | 450. 052 | 4523907. 412 |
| M179T290_2 | 179. 0337456 | 289. 534 | 82979949. 51 |
| M179T473   | 179. 033973  | 473. 329 | 2587947. 488 |
| M179T494   | 179. 0339084 | 493. 56  | 2372203. 548 |
| M179T161   | 179. 0372085 | 161. 184 | 2106871. 102 |
| M179T518   | 179. 0338907 | 518. 474 | 1924381. 771 |
| M179T237   | 179. 0337255 | 236. 518 | 2024483. 371 |
| M179T484   | 179. 0339232 | 484. 221 | 2671205. 829 |
| M179T509   | 179. 0339195 | 509. 11  | 2659154. 45  |
| M179T408   | 179. 0337693 | 408. 368 | 2787837. 168 |
| M179T378_1 | 179. 0340512 | 377. 64  | 8157216. 93  |
| M179T542   | 179. 0339573 | 541. 673 | 4477516. 782 |
| M179T266   | 179. 054785  | 265. 541 | 42941012. 99 |
| M179T261   | 179. 0530729 | 261. 138 | 35157212. 97 |
| M179T769   | 179. 054807  | 768. 696 | 124625770. 9 |
| M179T411   | 179. 0519784 | 411. 444 | 97600883. 4  |
| M179T600   | 179. 0531336 | 599. 904 | 62142888. 36 |
| M179T514   | 179. 0531528 | 513. 768 | 42539734. 53 |
| M179T744   | 179. 0530951 | 744. 192 | 85704155. 09 |
| M179T432   | 179. 0518895 | 431. 507 | 48476619. 8  |
| M179T442   | 179. 0520822 | 442. 399 | 67339467. 75 |
| M179T609   | 179. 0548031 | 609. 19  | 84022517. 53 |
| M179T122   | 179. 0547728 | 122. 381 | 203383303. 6 |
| M179T540   | 179. 0547779 | 540. 152 | 91030328. 59 |
| M179T302   | 179. 0531083 | 301. 725 | 63291408. 84 |
| M179T826   | 179. 0547989 | 826. 333 | 86212685. 23 |
| M179T136   | 179. 054765  | 135. 795 | 250633775. 8 |
| M179T470   | 179. 0547835 | 470. 253 | 116473411. 2 |
| M179T188   | 179. 0547834 | 188. 174 | 109585697. 5 |
| M179T715   | 179. 0530957 | 714. 841 | 123083560. 7 |
| M179T93_1  | 179. 0547724 | 92. 9618 | 7767660709   |
| M179T688   | 179. 0547812 | 688. 189 | 90924133. 87 |
| M179T655   | 179. 0547976 | 655. 321 | 170017640. 2 |
| M179T321   | 179. 0547941 | 321. 312 | 66984249. 68 |
| M179T332   | 179. 0547652 | 332. 105 | 86967752. 28 |
| M179T83    | 179. 0547716 | 82. 8986 | 466916056. 7 |
| M179T244   | 179. 0522697 | 243. 976 | 466834300    |
| M179T149   | 179. 0547681 | 148. 981 | 154373556. 3 |
| M179T175   | 179. 0547824 | 174. 576 | 174025945. 3 |
| M179T569   | 179. 0518988 | 569. 091 | 230231121. 6 |
| M179T632   | 179. 0530868 | 632. 288 | 176686206. 6 |
| M179T732   | 179. 0547881 | 731. 793 | 71349999. 94 |
| M179T378_2 | 179. 0531855 | 377. 64  | 73601205. 74 |



|            |              |          |              |
|------------|--------------|----------|--------------|
| M179T394   | 179. 0547722 | 394. 467 | 115057498. 8 |
| M179T698   | 179. 0531203 | 698. 034 | 69476512. 08 |
| M179T286   | 179. 0547626 | 286. 433 | 69414104. 36 |
| M179T798   | 179. 0531328 | 797. 757 | 187571846    |
| M179T526   | 179. 0530983 | 526. 124 | 85190070. 48 |
| M179T490   | 179. 0547916 | 490. 434 | 185065585. 9 |
| M179T312   | 179. 0530993 | 312. 058 | 71845914. 04 |
| M179T835   | 179. 0548079 | 835. 329 | 62189378. 6  |
| M179T814   | 179. 0548097 | 814. 118 | 103427872. 7 |
| M179T753   | 179. 0548023 | 753. 315 | 89909063. 63 |
| M179T350   | 179. 056182  | 350. 108 | 65171129. 05 |
| M179T273   | 179. 0564299 | 273. 232 | 60965927. 89 |
| M179T343   | 179. 0562    | 342. 819 | 53374067. 66 |
| M179T452   | 179. 0561842 | 451. 616 | 70508346. 85 |
| M179T359   | 179. 0562014 | 359. 297 | 70875117. 93 |
| M179T160   | 179. 0561908 | 159. 635 | 180169181. 5 |
| M179T520   | 179. 0700371 | 519. 998 | 3010605. 177 |
| M179T746   | 179. 0700632 | 745. 747 | 1573864. 216 |
| M179T378_3 | 179. 0700745 | 377. 64  | 4767313. 2   |
| M179T674   | 179. 0699309 | 673. 771 | 2341640. 577 |
| M179T290_3 | 179. 1116344 | 289. 534 | 217992. 6715 |
| M179T93_2  | 179. 1332538 | 92. 9618 | 42981951. 15 |
| M179T115   | 179. 1336101 | 115. 123 | 6956845. 97  |
| M179T137   | 179. 1333542 | 137. 226 | 958357. 5544 |
| M180T789   | 179. 9875717 | 788. 604 | 6980116. 852 |
| M180T811   | 179. 9875035 | 811. 292 | 4475545. 49  |
| M180T759   | 179. 9875782 | 759. 428 | 16787925. 98 |
| M180T802   | 179. 9875882 | 802. 116 | 5817154. 885 |
| M180T825_1 | 179. 9875796 | 824. 864 | 6407703. 148 |
| M180T835_1 | 179. 9875845 | 835. 329 | 6936174. 634 |
| M180T48    | 180. 0290481 | 47. 7826 | 102289. 4218 |
| M180T40    | 180. 0290093 | 40. 4091 | 248589. 0565 |
| M180T433   | 180. 0290845 | 433. 06  | 825245. 354  |
| M180T327   | 180. 0286764 | 327. 449 | 956122. 7054 |
| M180T58    | 180. 0290136 | 58. 1047 | 369044. 7067 |
| M180T33    | 180. 0290775 | 32. 8715 | 255949. 7333 |
| M180T83_1  | 180. 0290024 | 82. 8986 | 14380283. 68 |
| M180T215   | 180. 028907  | 215. 4   | 1533243. 843 |
| M180T340   | 180. 028837  | 339. 772 | 1261631. 694 |
| M180T405   | 180. 0290784 | 405. 254 | 842826. 8897 |
| M180T359   | 180. 028975  | 359. 297 | 1446335. 924 |
| M180T290   | 180. 0370677 | 289. 534 | 7710782. 122 |
| M180T378   | 180. 0369646 | 377. 64  | 727937. 4046 |
| M180T273   | 180. 0581652 | 273. 232 | 2506605. 043 |
| M180T278   | 180. 0580843 | 278. 267 | 1755537. 862 |
| M180T601   | 180. 0580984 | 601. 473 | 4410945. 923 |
| M180T580   | 180. 0582195 | 579. 883 | 7639813. 211 |
| M180T435   | 180. 0581422 | 434. 617 | 8458038. 187 |
| M180T309   | 180. 0581271 | 309. 091 | 3665305. 929 |
| M180T622   | 180. 058061  | 621. 547 | 4813516. 031 |
| M180T245   | 180. 0581498 | 245. 353 | 4670707. 553 |
| M180T124   | 180. 0580387 | 123. 792 | 13362867. 34 |
| M180T223   | 180. 0581351 | 222. 943 | 5766000. 044 |
| M180T559   | 180. 0582057 | 558. 574 | 3452113. 677 |

|            |             |          |             |
|------------|-------------|----------|-------------|
| M180T285   | 180.0581029 | 285.167  | 4118557.137 |
| M180T147   | 180.0579882 | 147.455  | 13127158.46 |
| M180T356   | 180.0581827 | 356.274  | 10955312.3  |
| M180T234   | 180.0581306 | 233.519  | 6016587.46  |
| M180T470   | 180.0582359 | 470.253  | 5026774.458 |
| M180T534   | 180.0581213 | 533.931  | 5384027.442 |
| M180T93    | 180.0579862 | 92.9618  | 493130077.8 |
| M180T688   | 180.0581842 | 688.189  | 4935586.538 |
| M180T655   | 180.058133  | 655.321  | 11432314.53 |
| M180T379   | 180.058194  | 379.066  | 5158781.307 |
| M180T321   | 180.0580242 | 321.312  | 5134616.359 |
| M180T262   | 180.0580738 | 262.302  | 8899256.45  |
| M180T517   | 180.058155  | 516.908  | 4262747.268 |
| M180T772   | 180.0580778 | 771.785  | 6012534.711 |
| M180T332   | 180.0581861 | 332.105  | 5025366.124 |
| M180T611   | 180.0582153 | 610.742  | 4341576.183 |
| M180T83_2  | 180.0585057 | 82.8986  | 28835090.78 |
| M180T697   | 180.0581412 | 697.061  | 4485147.452 |
| M180T569   | 180.0581492 | 569.091  | 4970284.571 |
| M180T634   | 180.0581029 | 633.832  | 3868548.397 |
| M180T134   | 180.0580734 | 134.253  | 9567081.591 |
| M180T459   | 180.0582131 | 459.324  | 3857019.746 |
| M180T549   | 180.0581944 | 549.371  | 4293650.691 |
| M180T726   | 180.0580994 | 725.713  | 16211655.89 |
| M180T799   | 180.0580945 | 799.306  | 6300422.355 |
| M180T452   | 180.0582866 | 451.616  | 3274889.757 |
| M180T492   | 180.058214  | 491.99   | 12198442.29 |
| M180T526   | 180.0580996 | 526.124  | 2744191.406 |
| M180T394   | 180.0581388 | 394.467  | 5294542.316 |
| M180T784   | 180.0582697 | 784.051  | 5410743.027 |
| M180T296_1 | 180.0581625 | 295.704  | 3551243.945 |
| M180T825_2 | 180.0580746 | 824.864  | 4958173.428 |
| M180T835_2 | 180.0580284 | 835.329  | 4393576.029 |
| M180T814   | 180.0581069 | 814.118  | 7508205.84  |
| M180T160   | 180.0580416 | 159.635  | 8814371.915 |
| M180T753   | 180.0582161 | 753.315  | 6890130.679 |
| M180T106   | 180.0648749 | 105.537  | 1477944.798 |
| M180T202   | 180.0639553 | 201.897  | 10681219.42 |
| M180T172   | 180.0662997 | 171.546  | 127672562.2 |
| M180T407   | 180.0654368 | 406.813  | 17087245.4  |
| M180T194   | 180.0765068 | 194.243  | 2551892.563 |
| M180T296_2 | 180.0766179 | 295.704  | 60638809.49 |
| M181T34    | 180.9108255 | 34.4117  | 310340.5633 |
| M181T87_1  | 180.929398  | 87.426   | 7591333.901 |
| M181T52    | 180.9715283 | 51.65305 | 49590.99305 |
| M181T65    | 180.9715317 | 65.0166  | 318558.9617 |
| M181T33    | 180.9730763 | 32.8715  | 360563.3573 |
| M181T87_2  | 180.971519  | 87.426   | 4193521.414 |
| M181T79    | 180.9800663 | 79.4105  | 3321358.028 |
| M181T551   | 180.988139  | 550.932  | 1282474.926 |
| M181T91_1  | 180.990393  | 90.9026  | 4858596.411 |
| M181T106_1 | 181.0127884 | 105.537  | 2682870.143 |
| M181T253   | 181.0128729 | 252.703  | 586688.6599 |
| M181T391   | 181.0129724 | 391.341  | 1345098.488 |

|            |              |          |              |
|------------|--------------|----------|--------------|
| M181T337   | 181. 0127897 | 336. 681 | 5234276. 393 |
| M181T181   | 181. 0130608 | 180. 601 | 5245327. 322 |
| M181T124   | 181. 0130409 | 123. 792 | 1719936. 103 |
| M181T31    | 181. 0131283 | 31. 4228 | 267658. 7891 |
| M181T466   | 181. 013114  | 465. 575 | 899960. 2671 |
| M181T151_1 | 181. 0130403 | 150. 528 | 5338885. 809 |
| M181T807_1 | 181. 0491951 | 806. 698 | 818176. 2369 |
| M181T495   | 181. 0492377 | 495. 125 | 3060571. 293 |
| M181T744   | 181. 04934   | 744. 192 | 3337512. 844 |
| M181T795   | 181. 0491987 | 794. 753 | 1714543. 68  |
| M181T421   | 181. 0492298 | 420. 799 | 4960089. 465 |
| M181T184   | 181. 0492243 | 183. 708 | 8068361. 823 |
| M181T578   | 181. 0492489 | 578. 353 | 2689940. 136 |
| M181T373   | 181. 0491816 | 373. 196 | 6491477. 679 |
| M181T442   | 181. 0493091 | 442. 399 | 7059850. 924 |
| M181T609   | 181. 0492065 | 609. 19  | 4445499. 243 |
| M181T523   | 181. 0495265 | 523. 055 | 3617808. 672 |
| M181T399   | 181. 0492477 | 399. 086 | 5590420. 675 |
| M181T823   | 181. 0492326 | 823. 375 | 1114192. 284 |
| M181T781_1 | 181. 0493218 | 780. 958 | 1318029. 379 |
| M181T197   | 181. 0488587 | 197. 335 | 16462688. 19 |
| M181T620   | 181. 0492689 | 619. 986 | 2501154. 847 |
| M181T568   | 181. 0493961 | 567. 543 | 3656907. 47  |
| M181T483   | 181. 0493328 | 482. 656 | 2863123. 858 |
| M181T594   | 181. 0492648 | 593. 841 | 2592147. 741 |
| M181T430   | 181. 0493142 | 429. 94  | 2402373. 86  |
| M181T648   | 181. 0492139 | 647. 653 | 5324814. 504 |
| M181T347   | 181. 0492369 | 347. 166 | 7181632. 02  |
| M181T469   | 181. 0492857 | 468. 69  | 4033637. 298 |
| M181T338   | 181. 0493584 | 338. 222 | 5406062. 537 |
| M181T508   | 181. 0493289 | 507. 55  | 1625530. 021 |
| M181T318   | 181. 0494331 | 318. 232 | 4543415. 093 |
| M181T294   | 181. 0491015 | 294. 152 | 10524925. 87 |
| M181T718   | 181. 0492912 | 717. 942 | 3816843. 136 |
| M181T764   | 181. 0492887 | 764. 034 | 1217813. 358 |
| M181T690   | 181. 0492864 | 689. 75  | 2387322. 125 |
| M181T773   | 181. 0492702 | 773. 333 | 1418236. 002 |
| M181T698   | 181. 0492635 | 698. 034 | 1072928. 536 |
| M181T814   | 181. 049215  | 814. 118 | 1124781. 273 |
| M181T387   | 181. 0493126 | 386. 78  | 3931662. 925 |
| M181T677_1 | 181. 0486636 | 676. 878 | 3470222. 922 |
| M181T835_1 | 181. 0492231 | 835. 329 | 1171814. 636 |
| M181T540   | 181. 0506115 | 540. 152 | 13236357. 58 |
| M181T151_2 | 181. 05999   | 150. 528 | 4728711. 798 |
| M181T661   | 181. 0700338 | 661. 453 | 16168863. 36 |
| M181T828   | 181. 0700005 | 827. 821 | 16595390. 1  |
| M181T723   | 181. 0700167 | 722. 604 | 11718320. 37 |
| M181T106_2 | 181. 0691897 | 105. 537 | 91551583. 83 |
| M181T770   | 181. 0700693 | 770. 235 | 16798046. 46 |
| M181T807_2 | 181. 0701934 | 806. 698 | 14750206. 31 |
| M181T688   | 181. 0702791 | 688. 189 | 10677532. 64 |
| M181T172   | 181. 069452  | 171. 546 | 17684121. 44 |
| M181T741   | 181. 070025  | 741. 077 | 14776691. 46 |
| M181T781_2 | 181. 0700491 | 780. 958 | 17116755. 56 |

|            |              |          |              |
|------------|--------------|----------|--------------|
| M181T816   | 181. 0700117 | 815. 664 | 14225163. 47 |
| M181T696   | 181. 0699742 | 695. 893 | 6344100. 377 |
| M181T91_2  | 181. 0691343 | 90. 9026 | 1606594776   |
| M181T732   | 181. 0699931 | 731. 793 | 11298521. 71 |
| M181T798   | 181. 0700411 | 797. 757 | 20267063. 02 |
| M181T835_2 | 181. 0701786 | 835. 329 | 12720427. 49 |
| M181T713   | 181. 0700238 | 713. 292 | 12620437. 43 |
| M181T677_2 | 181. 0702571 | 676. 878 | 13323091. 37 |
| M181T753   | 181. 0700053 | 753. 315 | 11895678. 52 |
| M181T580   | 181. 0855284 | 579. 883 | 2008588. 253 |
| M181T456   | 181. 0857521 | 456. 2   | 3503690. 459 |
| M181T293   | 181. 0855197 | 292. 621 | 506121. 5498 |
| M181T384   | 181. 085643  | 383. 727 | 1302753. 243 |
| M181T91_3  | 181. 1487173 | 90. 9026 | 6033762. 465 |
| M182T693   | 181. 9161235 | 692. 781 | 897714. 0392 |
| M182T805   | 181. 936216  | 805. 145 | 692107. 8046 |
| M182T759   | 181. 9362087 | 759. 428 | 5983589. 162 |
| M182T697   | 181. 9364745 | 697. 061 | 6728721. 592 |
| M182T738   | 181. 9362389 | 737. 955 | 5522728. 515 |
| M182T713   | 181. 93634   | 713. 292 | 5297213. 991 |
| M182T483   | 182. 0080944 | 482. 656 | 1446232. 327 |
| M182T200   | 182. 0081299 | 200. 362 | 2408865. 877 |
| M182T119   | 182. 044481  | 119. 413 | 1705999. 8   |
| M182T99    | 182. 0445488 | 98. 9649 | 7371768. 941 |
| M182T349   | 182. 0436814 | 348. 668 | 26649505. 16 |
| M182T331   | 182. 0443831 | 330. 552 | 4567157. 621 |
| M182T232   | 182. 0441781 | 231. 973 | 16499762. 97 |
| M182T128   | 182. 0444524 | 128. 279 | 2676052. 414 |
| M182T176   | 182. 0438744 | 176. 104 | 30976027. 3  |
| M182T556   | 182. 0446464 | 555. 524 | 1415134. 712 |
| M182T109   | 182. 044429  | 109. 475 | 3105735. 86  |
| M182T320   | 182. 044252  | 319. 785 | 3393791. 328 |
| M182T146   | 182. 0444014 | 146. 08  | 2663287. 564 |
| M182T303   | 182. 0441796 | 303. 259 | 11420601. 22 |
| M182T442   | 182. 0527186 | 442. 399 | 618086. 4664 |
| M182T540   | 182. 0527826 | 540. 152 | 1090968. 743 |
| M182T91    | 182. 0738729 | 90. 9026 | 102430798. 5 |
| M182T571   | 182. 0736193 | 570. 599 | 708194. 3896 |
| M182T346   | 182. 0809671 | 345. 761 | 5608618. 869 |
| M182T296   | 182. 0809805 | 295. 704 | 1383000. 212 |
| M182T334   | 182. 0811846 | 333. 655 | 5167851. 722 |
| M182T332   | 182. 0922277 | 332. 105 | 19825642. 54 |
| M183T694   | 182. 9287061 | 694. 341 | 1762784. 538 |
| M183T433   | 182. 9403144 | 433. 06  | 2085583. 882 |
| M183T31_1  | 182. 9878756 | 31. 4228 | 388195. 7634 |
| M183T835   | 182. 9872187 | 835. 329 | 3465596. 183 |
| M183T55    | 183. 0034621 | 55. 0453 | 196181. 8878 |
| M183T106   | 183. 0051938 | 105. 537 | 6322930. 122 |
| M183T472   | 183. 0035625 | 471. 768 | 1260080. 474 |
| M183T114   | 183. 0049312 | 113. 762 | 5218313. 445 |
| M183T66    | 183. 0034333 | 66. 2043 | 555289. 8375 |
| M183T44    | 183. 0034529 | 44. 4091 | 1217560. 488 |
| M183T327   | 183. 0285898 | 327. 449 | 2210426. 357 |
| M183T415   | 183. 0285901 | 414. 571 | 1465828. 356 |

|            |              |          |              |
|------------|--------------|----------|--------------|
| M183T353   | 183. 0285888 | 353. 163 | 1599933. 075 |
| M183T158   | 183. 0286583 | 158. 1   | 3366992. 875 |
| M183T31_2  | 183. 0287437 | 31. 4228 | 141094. 6913 |
| M183T281   | 183. 0286297 | 281. 097 | 7104312. 54  |
| M183T169   | 183. 0286187 | 168. 507 | 8469725. 925 |
| M183T232   | 183. 0480405 | 231. 973 | 1247409. 675 |
| M183T176   | 183. 0480964 | 176. 104 | 2319912. 221 |
| M183T375   | 183. 065019  | 374. 746 | 1787275. 593 |
| M183T515   | 183. 0647674 | 515. 338 | 1025663. 326 |
| M183T466   | 183. 065083  | 465. 575 | 842620. 2135 |
| M183T294   | 183. 064942  | 294. 152 | 1331819. 622 |
| M183T340   | 183. 0650502 | 339. 772 | 2818451. 973 |
| M183T91    | 183. 0745757 | 90. 9026 | 18189297. 02 |
| M183T267   | 183. 0762228 | 267. 169 | 230782. 369  |
| M183T166   | 183. 1011675 | 165. 522 | 378352. 0518 |
| M183T331   | 183. 1013955 | 330. 552 | 534541. 0634 |
| M183T512   | 183. 1013444 | 512. 228 | 2498310. 606 |
| M183T566   | 183. 1011934 | 566. 042 | 828449. 6643 |
| M183T486   | 183. 1014689 | 485. 784 | 4694869. 658 |
| M183T532   | 183. 1012535 | 532. 372 | 1706749. 301 |
| M183T677   | 183. 1011079 | 676. 878 | 1943021. 198 |
| M183T439   | 183. 1013839 | 439. 27  | 2484314. 367 |
| M183T487   | 183. 1377431 | 487. 329 | 554335. 2831 |
| M184T253   | 184. 0237286 | 252. 703 | 1119982. 848 |
| M184T121   | 184. 0600458 | 120. 945 | 18957984. 16 |
| M184T267   | 184. 0599048 | 266. 709 | 4981866. 73  |
| M184T203   | 184. 0604398 | 203. 346 | 8561404. 98  |
| M184T106   | 184. 0603859 | 105. 537 | 45943236. 06 |
| M184T293   | 184. 0599425 | 292. 621 | 3041451. 884 |
| M184T221   | 184. 0600704 | 221. 453 | 4123831. 759 |
| M184T188   | 184. 0600452 | 188. 174 | 6905000. 334 |
| M184T134   | 184. 060101  | 134. 253 | 8372559. 468 |
| M184T308   | 184. 0599809 | 307. 616 | 9051790. 128 |
| M184T169   | 184. 0600609 | 168. 507 | 6879448. 31  |
| M184T146   | 184. 0604321 | 146. 08  | 20923611. 61 |
| M184T359   | 184. 0600358 | 359. 297 | 3656633. 086 |
| M184T373   | 184. 0954976 | 373. 196 | 1599639. 683 |
| M184T61    | 184. 0966191 | 61. 4369 | 1394655. 246 |
| M184T145   | 184. 0963965 | 144. 706 | 1113309. 318 |
| M184T344   | 184. 0956009 | 344. 233 | 1305437. 922 |
| M184T384   | 184. 0965806 | 383. 727 | 2187423. 095 |
| M184T40    | 184. 0966831 | 40. 4091 | 462979. 5781 |
| M185T694   | 184. 925969  | 694. 341 | 525083. 8287 |
| M185T273   | 184. 9490503 | 273. 232 | 83541. 75775 |
| M185T297   | 185. 0076996 | 297. 149 | 1638728. 296 |
| M185T106_1 | 185. 0442559 | 105. 537 | 9720129. 87  |
| M185T293   | 185. 0446682 | 292. 621 | 4419040. 701 |
| M185T320   | 185. 0441541 | 319. 785 | 1946513. 737 |
| M185T286   | 185. 0552994 | 286. 433 | 1815944. 244 |
| M185T173   | 185. 0552433 | 173. 092 | 1147624. 536 |
| M185T106_2 | 185. 0639364 | 105. 537 | 3271366. 22  |
| M185T327   | 185. 0806898 | 327. 449 | 3128924. 509 |
| M185T367   | 185. 0806504 | 367. 026 | 4066883. 797 |
| M185T517   | 185. 080624  | 516. 908 | 6819788. 112 |

|          |             |         |             |
|----------|-------------|---------|-------------|
| M185T140 | 185.0917575 | 140.209 | 1363336.671 |
| M185T256 | 185.0917977 | 255.831 | 166606.6256 |
| M185T622 | 185.1169803 | 621.547 | 1588087.552 |
| M185T559 | 185.1171671 | 558.574 | 3183390.605 |
| M185T546 | 185.1168212 | 546.308 | 1578499.983 |
| M185T589 | 185.1172483 | 589.157 | 2017550.992 |
| M185T518 | 185.1171899 | 518.474 | 8330047.192 |
| M185T467 | 185.117272  | 467.127 | 6731790.39  |
| M185T532 | 185.1167079 | 532.372 | 2045768.11  |
| M185T606 | 185.1171134 | 606.096 | 1905722.338 |
| M186T365 | 186.0110979 | 365.475 | 5074030.52  |
| M186T242 | 186.0216626 | 242.223 | 265697.1164 |
| M186T78  | 186.039439  | 78.2661 | 32125169    |
| M186T106 | 186.0759544 | 105.537 | 16294099.38 |
| M186T118 | 186.0758349 | 117.954 | 4117823.31  |
| M186T424 | 186.0760669 | 423.877 | 2200736.293 |
| M186T282 | 186.0758535 | 281.942 | 2469873.809 |
| M186T240 | 186.0757761 | 239.574 | 4290638.405 |
| M186T296 | 186.0758486 | 295.704 | 3540961.352 |
| M186T160 | 186.0758351 | 159.635 | 18434871.66 |
| M186T309 | 186.1122812 | 309.091 | 2527027.526 |
| M186T55  | 186.1121936 | 54.999  | 184906.6379 |
| M186T43  | 186.1122099 | 43.4241 | 1650629.822 |
| M186T384 | 186.1124797 | 383.727 | 4450179.804 |
| M186T66  | 186.1122052 | 66.2043 | 1201142.943 |
| M186T279 | 186.1125299 | 278.627 | 1261118.853 |
| M186T439 | 186.1125088 | 439.27  | 2010823.892 |
| M186T518 | 186.1204324 | 518.474 | 795177.1811 |
| M187T581 | 186.8628134 | 581.442 | 874723.952  |
| M187T365 | 187.0123382 | 365.475 | 1635756.44  |
| M187T81  | 187.0233586 | 80.6174 | 25185388.83 |
| M187T258 | 187.0234507 | 258.208 | 3952027.997 |
| M187T151 | 187.0234589 | 150.528 | 2923978.684 |
| M187T220 | 187.0234311 | 219.979 | 3905213.33  |
| M187T83  | 187.05993   | 82.8986 | 2536674.187 |
| M187T146 | 187.059863  | 146.08  | 5703626.828 |
| M187T461 | 187.0951285 | 460.89  | 32045166    |
| M187T370 | 187.096502  | 370.115 | 180648317.4 |
| M187T227 | 187.1077104 | 227.421 | 4783926.044 |
| M187T124 | 187.1074052 | 123.792 | 3413196.238 |
| M187T107 | 187.1076685 | 106.648 | 7611401.666 |
| M187T136 | 187.1073406 | 135.795 | 1721386.03  |
| M187T255 | 187.1075221 | 255.113 | 3087905.015 |
| M187T282 | 187.1077081 | 281.942 | 3058668.151 |
| M187T517 | 187.1326534 | 516.908 | 5501692.434 |
| M187T612 | 187.1320722 | 612.3   | 11657294.8  |
| M187T528 | 187.1326278 | 527.688 | 4715750.586 |
| M187T640 | 187.1319498 | 640.057 | 585542.9269 |
| M188T707 | 187.8595262 | 707.143 | 2751041.455 |
| M188T232 | 187.8595285 | 231.973 | 2802961.911 |
| M188T755 | 187.8595886 | 754.814 | 709064.2316 |
| M188T724 | 187.8594998 | 724.158 | 2007917.664 |
| M188T263 | 187.8597815 | 263.129 | 960072.1371 |
| M188T282 | 187.8596837 | 281.942 | 1608707.412 |

|            |              |          |              |
|------------|--------------|----------|--------------|
| M188T273   | 187. 8596149 | 273. 232 | 2210454. 219 |
| M188T64    | 187. 8598796 | 64. 0412 | 72261. 0537  |
| M188T234_1 | 187. 9497221 | 233. 519 | 118499. 7296 |
| M188T87    | 187. 9944404 | 87. 426  | 34924509. 7  |
| M188T202   | 188. 0011123 | 201. 897 | 1961975. 071 |
| M188T277   | 188. 0011976 | 276. 825 | 5261640. 516 |
| M188T435   | 188. 0342413 | 434. 617 | 946740. 5333 |
| M188T234_2 | 188. 033595  | 233. 519 | 30144060. 93 |
| M188T531   | 188. 0342032 | 530. 804 | 1450920. 163 |
| M188T79    | 188. 0550422 | 79. 4105 | 30790427. 81 |
| M188T291   | 188. 0552337 | 291. 076 | 996816. 3097 |
| M188T124   | 188. 0914162 | 123. 792 | 6480996. 332 |
| M188T147   | 188. 0922316 | 147. 455 | 22265732. 65 |
| M188T297   | 188. 0915759 | 297. 149 | 1310799. 927 |
| M188T259   | 188. 0916361 | 259. 134 | 559024. 7146 |
| M188T108   | 188. 0914453 | 108. 082 | 9524700. 659 |
| M188T324   | 188. 0916715 | 324. 413 | 7731950. 755 |
| M188T370   | 188. 0996036 | 370. 115 | 16512197. 32 |
| M188T462   | 188. 0996842 | 462. 446 | 575979. 4435 |
| M188T308   | 188. 1278112 | 307. 616 | 354429. 0391 |
| M188T612   | 188. 1362078 | 612. 3   | 931758. 3939 |
| M189T439   | 188. 9502951 | 439. 27  | 5249810. 043 |
| M189T181   | 188. 9847758 | 180. 601 | 10288537. 88 |
| M189T86    | 188. 9793853 | 86. 3396 | 6371796. 468 |
| M189T99    | 189. 0390538 | 98. 9649 | 11025326. 14 |
| M189T106   | 189. 0390569 | 105. 537 | 16774776. 51 |
| M189T234   | 189. 0384553 | 233. 519 | 5428461. 878 |
| M189T92    | 189. 0391098 | 91. 9113 | 12231243. 91 |
| M189T83    | 189. 0390934 | 82. 8986 | 7793021. 889 |
| M189T300   | 189. 0393999 | 300. 176 | 6283146. 906 |
| M189T151   | 189. 0393186 | 150. 528 | 8312707. 669 |
| M189T720   | 189. 0542814 | 719. 505 | 534069. 6242 |
| M189T337   | 189. 0743228 | 336. 681 | 1949322. 215 |
| M189T305   | 189. 0757428 | 304. 743 | 14405662. 81 |
| M189T258   | 189. 0757567 | 258. 208 | 3776190. 557 |
| M189T442   | 189. 11178   | 442. 399 | 2771909. 04  |
| M189T483   | 189. 1120178 | 482. 656 | 2506449. 421 |
| M190T661   | 189. 8569076 | 661. 453 | 4720922. 769 |
| M190T693   | 189. 8583907 | 692. 781 | 2575887. 747 |
| M190T302   | 189. 9301395 | 301. 725 | 3121508. 626 |
| M190T279   | 189. 9305282 | 278. 627 | 2093568. 066 |
| M190T256   | 189. 9301253 | 255. 831 | 2751317. 365 |
| M190T286   | 189. 9305103 | 286. 433 | 3400269. 512 |
| M190T178   | 189. 930055  | 177. 649 | 4678315. 386 |
| M190T191   | 189. 930123  | 191. 259 | 5627458. 535 |
| M190T272   | 189. 9305307 | 272. 312 | 1920460. 91  |
| M190T140   | 189. 9305523 | 140. 209 | 5621734. 141 |
| M190T264   | 189. 9305313 | 263. 845 | 3032332. 692 |
| M190T164   | 189. 9305369 | 164. 077 | 6200476. 463 |
| M190T224_1 | 189. 9305475 | 224. 484 | 16517103. 04 |
| M190T246   | 189. 9305309 | 246. 013 | 4420492. 854 |
| M190T130   | 189. 9305502 | 129. 827 | 5967371. 491 |
| M190T152   | 189. 9305645 | 152. 08  | 3658240. 166 |
| M190T67    | 190. 0134395 | 67. 1831 | 429345. 9202 |

|            |              |          |              |
|------------|--------------|----------|--------------|
| M190T666   | 190. 0133043 | 666. 058 | 2078725. 793 |
| M190T52    | 190. 0134827 | 51. 9157 | 144716. 3166 |
| M190T362_1 | 190. 0265205 | 362. 384 | 1098135. 069 |
| M190T78    | 190. 034433  | 78. 2661 | 10526566. 82 |
| M190T436   | 190. 0496959 | 436. 18  | 1188833. 853 |
| M190T398   | 190. 0499828 | 397. 585 | 753442. 2933 |
| M190T224_2 | 190. 0494746 | 224. 484 | 2769776. 839 |
| M190T362_2 | 190. 0503297 | 362. 384 | 4906817. 901 |
| M190T161   | 190. 0513673 | 161. 184 | 1117605. 579 |
| M190T91    | 190. 070631  | 90. 9026 | 17167357. 34 |
| M190T337   | 190. 1082415 | 336. 681 | 1710842. 47  |
| M191T315   | 190. 9272373 | 315. 162 | 957179. 7512 |
| M191T75_1  | 190. 9317247 | 74. 6705 | 84597119. 06 |
| M191T441   | 190. 9472833 | 440. 833 | 3702505. 639 |
| M191T146_1 | 190. 9994098 | 146. 08  | 3815308. 113 |
| M191T743   | 191. 0169455 | 742. 631 | 2566646. 669 |
| M191T730   | 191. 0174397 | 730. 264 | 1732325. 354 |
| M191T693   | 191. 0174073 | 692. 781 | 2262123. 634 |
| M191T75_2  | 191. 0158969 | 74. 6705 | 16860906279  |
| M191T758   | 191. 0174645 | 757. 881 | 1710053. 243 |
| M191T277   | 191. 0170174 | 277. 42  | 7336739. 694 |
| M191T835   | 191. 0173788 | 835. 329 | 956345. 8265 |
| M191T273   | 191. 0184527 | 273. 232 | 4646361. 472 |
| M191T329   | 191. 0185459 | 328. 999 | 19501817. 67 |
| M191T119   | 191. 0184855 | 119. 413 | 46021264. 37 |
| M191T249   | 191. 018541  | 249. 466 | 10172863. 11 |
| M191T703   | 191. 01844   | 702. 622 | 3708620. 166 |
| M191T375   | 191. 0185075 | 374. 746 | 9179907. 458 |
| M191T681   | 191. 0184119 | 681. 406 | 2765123. 879 |
| M191T625   | 191. 0184431 | 624. 642 | 10516930. 1  |
| M191T649   | 191. 0185074 | 649. 195 | 6422873. 382 |
| M191T63_1  | 191. 0183627 | 63. 4462 | 11630488. 51 |
| M191T84_1  | 191. 0191888 | 83. 9405 | 2104077859   |
| M191T669   | 191. 0183736 | 669. 12  | 4727042. 616 |
| M191T520   | 191. 018383  | 519. 998 | 5385904. 809 |
| M191T232   | 191. 018517  | 231. 973 | 16666815. 89 |
| M191T221   | 191. 0185257 | 221. 453 | 16345818. 09 |
| M191T158   | 191. 0185669 | 158. 1   | 31443213. 96 |
| M191T562   | 191. 0184552 | 561. 624 | 15609436. 74 |
| M191T107   | 191. 0191577 | 106. 648 | 86776638. 44 |
| M191T826   | 191. 0184233 | 826. 333 | 1704807. 917 |
| M191T776   | 191. 0183585 | 776. 391 | 3397994. 02  |
| M191T188   | 191. 0185664 | 188. 174 | 61014229. 5  |
| M191T172   | 191. 0191882 | 171. 546 | 55728463. 49 |
| M191T500   | 191. 0185029 | 499. 759 | 4122913. 078 |
| M191T447   | 191. 0185003 | 446. 967 | 34620737. 27 |
| M191T314   | 191. 0184589 | 313. 612 | 19571998. 49 |
| M191T796_1 | 191. 018359  | 796. 202 | 2510239. 322 |
| M191T263   | 191. 0185004 | 263. 129 | 11959338. 33 |
| M191T804   | 191. 0185401 | 803. 615 | 2555304. 213 |
| M191T130   | 191. 0185442 | 129. 827 | 34921315. 13 |
| M191T347   | 191. 0185362 | 347. 166 | 10339440. 56 |
| M191T294   | 191. 0185475 | 294. 152 | 68119415. 48 |
| M191T718   | 191. 0184299 | 717. 942 | 3551009. 624 |



|            |              |           |              |
|------------|--------------|-----------|--------------|
| M191T597   | 191. 0185386 | 596. 795  | 7862327. 29  |
| M191T387   | 191. 0185559 | 386. 78   | 6728254. 679 |
| M191T146_2 | 191. 0185622 | 146. 08   | 38034023     |
| M191T359   | 191. 018557  | 359. 297  | 11858074. 02 |
| M191T199   | 191. 0185623 | 198. 821  | 68531000. 82 |
| M191T556_1 | 191. 0322742 | 555. 524  | 4378524. 427 |
| M191T480   | 191. 0322301 | 479. 541  | 3272762. 509 |
| M191T545   | 191. 0322221 | 544. 759  | 8754721. 154 |
| M191T61    | 191. 0341027 | 61. 4369  | 5079733. 645 |
| M191T660   | 191. 0336393 | 659. 904  | 4792187. 528 |
| M191T43    | 191. 034173  | 43. 4241  | 5227177. 725 |
| M191T121   | 191. 0545595 | 120. 945  | 20619873. 96 |
| M191T84_2  | 191. 0533071 | 83. 9405  | 1826454100   |
| M191T184   | 191. 0484312 | 183. 708  | 2126915. 031 |
| M191T370   | 191. 0535476 | 370. 115  | 2915269. 909 |
| M191T338   | 191. 0535605 | 338. 222  | 4186036. 346 |
| M191T146_3 | 191. 0535631 | 146. 08   | 12982324. 58 |
| M191T170   | 191. 0546381 | 170. 049  | 9274557. 67  |
| M191T104   | 191. 055903  | 104. 493  | 24604710. 04 |
| M191T828   | 191. 070255  | 827. 821  | 813659. 1655 |
| M191T837   | 191. 0702818 | 836. 769  | 524330. 6859 |
| M191T793   | 191. 0701769 | 793. 233  | 1502494. 041 |
| M191T615   | 191. 069922  | 615. 38   | 3787474. 828 |
| M191T781   | 191. 069877  | 780. 958  | 3554889. 516 |
| M191T805   | 191. 0702486 | 805. 145  | 1063448. 732 |
| M191T820   | 191. 0702934 | 820. 294  | 1083737. 774 |
| M191T556_2 | 191. 0730886 | 555. 524  | 3861877. 3   |
| M191T51    | 191. 1078087 | 50. 6021  | 98162. 05636 |
| M191T63_2  | 191. 1048023 | 63. 4462  | 532619. 1766 |
| M191T834   | 191. 1050387 | 833. 866  | 213796685. 3 |
| M191T84_3  | 191. 1043125 | 83. 9405  | 12788664. 37 |
| M191T75_3  | 191. 1040671 | 74. 6705  | 102827645    |
| M191T31    | 191. 1082001 | 31. 4228  | 10232075. 35 |
| M191T798   | 191. 1087788 | 797. 757  | 612305994. 8 |
| M191T84_4  | 191. 1420039 | 83. 9405  | 9210898. 158 |
| M191T796_2 | 191. 1913671 | 796. 202  | 3269175. 228 |
| M192T75_1  | 191. 935466  | 74. 6705  | 4180581. 634 |
| M192T54    | 191. 9452576 | 54. 4735  | 363882. 4644 |
| M192T61_1  | 191. 9452425 | 61. 4369  | 1153975. 382 |
| M192T43_1  | 191. 9452262 | 42. 6358  | 2712634. 602 |
| M192T693   | 191. 9448341 | 692. 781  | 2686534. 213 |
| M192T84_1  | 192. 0215804 | 83. 9405  | 128634061. 8 |
| M192T188   | 192. 0216487 | 188. 174  | 3586422. 615 |
| M192T172   | 192. 0216111 | 171. 546  | 3636092. 91  |
| M192T75_2  | 192. 0215903 | 74. 6705  | 1094529977   |
| M192T361   | 192. 0222762 | 360. 831  | 731450. 3034 |
| M192T294   | 192. 021932  | 294. 152  | 4225904. 46  |
| M192T108   | 192. 0215838 | 108. 082  | 2806561. 533 |
| M192T269   | 192. 0289922 | 269. 337  | 992998. 2928 |
| M192T466   | 192. 0291741 | 465. 575  | 445587. 6748 |
| M192T52    | 192. 0367562 | 51. 84595 | 42948. 29509 |
| M192T43_2  | 192. 0368156 | 42. 6358  | 257945. 4402 |
| M192T61_2  | 192. 0367548 | 60. 9725  | 99511. 08623 |
| M192T66    | 192. 0368575 | 66. 2043  | 106179. 5556 |

|            |             |         |             |
|------------|-------------|---------|-------------|
| M192T84_2  | 192.0581465 | 83.9405 | 137266949.7 |
| M192T456   | 192.0653549 | 456.2   | 2419689.824 |
| M192T293   | 192.0655076 | 292.621 | 1292525.981 |
| M192T224   | 192.0652616 | 224.484 | 1639061.282 |
| M192T376   | 192.0654609 | 376.15  | 9347985.234 |
| M192T194   | 192.0676406 | 194.243 | 1190541.772 |
| M192T759   | 192.1017633 | 759.428 | 13343574.39 |
| M192T834   | 192.109318  | 833.866 | 30779861.46 |
| M192T798   | 192.1087728 | 797.757 | 100922624.4 |
| M193T242   | 192.927614  | 242.223 | 1348827.971 |
| M193T246   | 192.9276163 | 246.474 | 1240106.008 |
| M193T221   | 192.9275197 | 221.453 | 5300632.506 |
| M193T266_1 | 192.9274704 | 265.541 | 1790889.109 |
| M193T255_1 | 192.9274783 | 254.651 | 1461829.773 |
| M193T281   | 192.9274673 | 281.097 | 3322914.453 |
| M193T47    | 192.9574733 | 46.6732 | 70374.98143 |
| M193T37    | 192.9575412 | 37.4486 | 176878.4938 |
| M193T291   | 192.9577664 | 291.076 | 893585.0373 |
| M193T60    | 192.9575186 | 59.8865 | 529770.7507 |
| M193T33    | 192.9881841 | 32.8715 | 357122.2801 |
| M193T229   | 193.012826  | 228.961 | 1480250.281 |
| M193T84_1  | 193.0228241 | 83.9405 | 26807972.08 |
| M193T75    | 193.0228256 | 74.6705 | 217873771.4 |
| M193T245   | 193.0322189 | 245.353 | 9999475.052 |
| M193T240   | 193.0353894 | 239.574 | 15963729.21 |
| M193T311   | 193.0322853 | 310.626 | 17178570.94 |
| M193T223   | 193.0322219 | 222.943 | 20098944.71 |
| M193T557   | 193.0355065 | 557.078 | 22471235.11 |
| M193T124   | 193.0323345 | 123.792 | 79809962.69 |
| M193T106   | 193.0344141 | 105.537 | 279998500.8 |
| M193T743   | 193.0322172 | 742.631 | 15961538.71 |
| M193T147_1 | 193.0355171 | 147.455 | 27410358.02 |
| M193T817   | 193.0322416 | 817.214 | 67704779.85 |
| M193T275   | 193.0322266 | 274.794 | 12431299.15 |
| M193T609   | 193.0322258 | 609.19  | 45985750.58 |
| M193T158   | 193.0322664 | 158.1   | 20768945.3  |
| M193T302   | 193.0322328 | 301.725 | 14197357.29 |
| M193T136   | 193.0355147 | 135.795 | 31941142.34 |
| M193T206   | 193.0353961 | 206.399 | 20349710.82 |
| M193T255_2 | 193.0322356 | 255.113 | 16839067.51 |
| M193T720   | 193.0322213 | 719.505 | 16902301.11 |
| M193T285   | 193.0322641 | 285.167 | 18987149.61 |
| M193T341   | 193.0323082 | 341.266 | 25634385.84 |
| M193T704   | 193.0322729 | 704.046 | 14069509.54 |
| M193T175   | 193.0322767 | 174.576 | 22171877.43 |
| M193T658   | 193.0322147 | 658.372 | 36975475.89 |
| M193T231   | 193.0353876 | 230.507 | 15195984.38 |
| M193T323   | 193.0354401 | 322.862 | 16658428.74 |
| M193T584_1 | 193.0322798 | 584.484 | 13052348.78 |
| M193T191   | 193.0322358 | 191.259 | 34625180.6  |
| M193T537   | 193.0356205 | 537.051 | 24354888.86 |
| M193T166   | 193.0355901 | 165.522 | 17091144.12 |
| M193T436   | 193.0356509 | 436.18  | 22222161.13 |
| M193T697_1 | 193.0356911 | 697.061 | 15313301.7  |

|            |              |          |              |
|------------|--------------|----------|--------------|
| M193T266_2 | 193. 035567  | 265. 541 | 14770525. 06 |
| M193T393_1 | 193. 0356655 | 392. 905 | 62795475. 01 |
| M193T577   | 193. 035684  | 576. 787 | 14193228. 99 |
| M193T688   | 193. 0356432 | 688. 189 | 18041961. 12 |
| M193T469   | 193. 03568   | 468. 69  | 17958273. 53 |
| M193T569   | 193. 0356495 | 569. 091 | 17651325. 88 |
| M193T332   | 193. 0355804 | 332. 105 | 14665347. 46 |
| M193T83    | 193. 0344169 | 82. 8986 | 94831504. 92 |
| M193T425   | 193. 0355961 | 425. 439 | 16507400. 61 |
| M193T732   | 193. 0356733 | 731. 793 | 23493687     |
| M193T764   | 193. 0356339 | 764. 034 | 15799075     |
| M193T528   | 193. 035647  | 527. 688 | 19719222. 09 |
| M193T678   | 193. 0357219 | 678. 416 | 22945838. 67 |
| M193T784   | 193. 0355745 | 784. 051 | 12219590. 83 |
| M193T461   | 193. 0356786 | 460. 89  | 12953823. 31 |
| M193T359   | 193. 0355391 | 359. 297 | 18961725. 03 |
| M193T490   | 193. 0356608 | 490. 434 | 20599446. 8  |
| M193T773   | 193. 0356367 | 773. 333 | 17895322. 29 |
| M193T503   | 193. 0356564 | 502. 873 | 24277690. 33 |
| M193T769   | 193. 0494617 | 768. 696 | 2397779. 703 |
| M193T727   | 193. 047859  | 727. 22  | 2288534. 408 |
| M193T738   | 193. 049538  | 737. 955 | 1557528. 637 |
| M193T638   | 193. 035641  | 638. 484 | 27838102. 98 |
| M193T583   | 193. 049553  | 582. 96  | 5567463. 67  |
| M193T632   | 193. 0500073 | 632. 288 | 14652552. 08 |
| M193T707   | 193. 049468  | 707. 143 | 1924980. 242 |
| M193T661   | 193. 047884  | 661. 453 | 5290108. 792 |
| M193T346   | 193. 0494439 | 345. 761 | 4252419. 305 |
| M193T793   | 193. 0486116 | 793. 233 | 1488570. 454 |
| M193T837   | 193. 0482093 | 836. 769 | 819143. 3103 |
| M193T823   | 193. 0492519 | 823. 375 | 1360620. 573 |
| M193T605   | 193. 0495811 | 604. 606 | 3281469. 668 |
| M193T816   | 193. 0481679 | 815. 664 | 1210627. 983 |
| M193T376   | 193. 0478666 | 376. 15  | 50643183. 06 |
| M193T804_1 | 193. 0481417 | 803. 615 | 1379816. 889 |
| M193T617   | 193. 0496607 | 616. 891 | 4367045. 858 |
| M193T450   | 193. 0356666 | 450. 052 | 18948615. 13 |
| M193T645   | 193. 0505928 | 644. 722 | 25871350. 65 |
| M193T559   | 193. 0509692 | 558. 574 | 1803565. 097 |
| M193T680   | 193. 0480115 | 679. 873 | 3982288. 445 |
| M193T393_2 | 193. 0492998 | 392. 905 | 4952257. 406 |
| M193T786   | 193. 0480295 | 785. 593 | 1537933. 367 |
| M193T697_2 | 193. 0479724 | 697. 061 | 1634296. 416 |
| M193T752   | 193. 0494776 | 751. 766 | 3291929. 42  |
| M193T84_2  | 193. 0588929 | 83. 9405 | 20166745. 72 |
| M193T344   | 193. 0605272 | 344. 233 | 1432512. 789 |
| M193T51    | 193. 0705368 | 50. 6021 | 89278. 53824 |
| M193T40    | 193. 0705904 | 40. 4091 | 577167. 9423 |
| M193T65    | 193. 0704443 | 65. 4825 | 365719. 3881 |
| M193T375   | 193. 0689975 | 374. 746 | 753120. 0846 |
| M193T147_2 | 193. 0707073 | 147. 455 | 3966062. 916 |
| M193T808   | 193. 0858644 | 808. 251 | 1175805. 027 |
| M193T789   | 193. 0855086 | 788. 604 | 2903651. 974 |
| M193T834   | 193. 0850614 | 833. 866 | 1181555. 178 |

|            |              |           |              |
|------------|--------------|-----------|--------------|
| M193T761   | 193. 085957  | 760. 976  | 10498612. 18 |
| M193T801   | 193. 0851336 | 800. 683  | 1972859. 645 |
| M193T778   | 193. 085967  | 777. 92   | 6164146. 827 |
| M193T820   | 193. 0860267 | 820. 294  | 2102505. 198 |
| M193T584_2 | 193. 0857746 | 584. 484  | 1164339. 017 |
| M193T401   | 193. 1082415 | 400. 641  | 136581. 8573 |
| M193T795   | 193. 1134161 | 794. 753  | 1637730. 327 |
| M193T804_2 | 193. 1135889 | 803. 615  | 2349102. 068 |
| M194T119   | 194. 0293127 | 119. 413  | 2803950. 354 |
| M194T75    | 194. 0256584 | 74. 6705  | 14287873. 55 |
| M194T133   | 194. 0291211 | 132. 707  | 1815044. 613 |
| M194T106   | 194. 0378485 | 105. 537  | 16455284. 69 |
| M194T83    | 194. 0376125 | 82. 8986  | 4930989. 748 |
| M194T346   | 194. 0444975 | 345. 761  | 17564986. 31 |
| M194T408   | 194. 0448285 | 408. 368  | 1170452. 395 |
| M194T286   | 194. 0444305 | 286. 433  | 593454. 6019 |
| M194T218   | 194. 0445915 | 218. 43   | 1405882. 06  |
| M194T584   | 194. 0447142 | 584. 484  | 1119743. 383 |
| M194T461   | 194. 0441402 | 460. 89   | 1043312. 466 |
| M194T137   | 194. 0444536 | 137. 226  | 2449653. 414 |
| M194T643   | 194. 0526464 | 643. 166  | 2274967. 23  |
| M194T631   | 194. 0526629 | 630. 737  | 1423475. 919 |
| M194T600   | 194. 0809173 | 599. 904  | 2529951. 053 |
| M194T456   | 194. 0803985 | 456. 2    | 8086002. 762 |
| M194T472   | 194. 0808927 | 471. 768  | 2537722. 782 |
| M194T410   | 194. 0813226 | 409. 881  | 1695195. 361 |
| M194T816   | 194. 0809959 | 815. 664  | 24980057. 12 |
| M194T318   | 194. 0809979 | 318. 232  | 2349201. 781 |
| M194T801   | 194. 0810294 | 800. 683  | 1552547. 106 |
| M194T654   | 194. 0808677 | 653. 835  | 1135093. 393 |
| M194T761   | 194. 0891057 | 760. 976  | 1211728. 729 |
| M194T140   | 194. 1021299 | 140. 209  | 762415. 5159 |
| M194T98    | 194. 1021332 | 97. 682   | 11313086. 78 |
| M194T112   | 194. 1021935 | 112. 287  | 3315191. 821 |
| M195T78    | 194. 839482  | 78. 2661  | 7534080. 725 |
| M195T53    | 194. 9040411 | 53. 32595 | 223300. 1025 |
| M195T65    | 194. 9051566 | 65. 4825  | 1818547. 583 |
| M195T36    | 194. 9038559 | 36. 0041  | 3347147. 179 |
| M195T77_1  | 194. 9261554 | 77. 2263  | 2069980560   |
| M195T275   | 194. 9777813 | 274. 794  | 1020765. 552 |
| M195T835   | 194. 9873554 | 835. 329  | 1343461. 126 |
| M195T93    | 194. 9957275 | 92. 9618  | 63562937. 56 |
| M195T77_2  | 195. 0147146 | 77. 2263  | 10131664. 75 |
| M195T327   | 195. 028708  | 327. 449  | 2933012. 094 |
| M195T202   | 195. 0286654 | 201. 897  | 5985182. 101 |
| M195T288   | 195. 0287232 | 287. 981  | 6302260. 009 |
| M195T365   | 195. 0285558 | 365. 475  | 6090849. 257 |
| M195T300   | 195. 0287713 | 300. 176  | 8722259. 42  |
| M195T438   | 195. 0279926 | 437. 734  | 5010589. 995 |
| M195T347   | 195. 0286409 | 347. 166  | 5283924. 109 |
| M195T252   | 195. 0287439 | 251. 727  | 1989568. 354 |
| M195T402   | 195. 0278245 | 402. 144  | 17542851. 19 |
| M195T106   | 195. 0384594 | 105. 537  | 2526822. 79  |
| M195T84    | 195. 0472512 | 83. 9405  | 779626783. 2 |

|            |              |           |              |
|------------|--------------|-----------|--------------|
| M195T96    | 195. 0494284 | 96. 4922  | 58242670. 44 |
| M195T537   | 195. 0637488 | 537. 051  | 1827552. 721 |
| M195T329   | 195. 0649102 | 328. 999  | 2397180. 924 |
| M195T559   | 195. 0638764 | 558. 574  | 1358988. 034 |
| M195T495   | 195. 0644507 | 495. 125  | 5750919. 96  |
| M195T410   | 195. 0638466 | 409. 881  | 2269390. 613 |
| M195T293   | 195. 0649423 | 292. 621  | 1836792. 86  |
| M195T512   | 195. 0638994 | 512. 228  | 2139336. 335 |
| M195T598   | 195. 0649023 | 598. 341  | 3371091. 513 |
| M195T464   | 195. 0644883 | 464. 011  | 11063192. 75 |
| M195T483   | 195. 0637056 | 482. 656  | 5832476. 025 |
| M195T422   | 195. 0637356 | 422. 362  | 1967623. 438 |
| M195T379   | 195. 064634  | 379. 066  | 32574981. 23 |
| M195T396   | 195. 0637061 | 396. 023  | 3980518. 467 |
| M195T441   | 195. 0661304 | 440. 833  | 2237147. 925 |
| M195T697   | 195. 0639544 | 697. 061  | 1853748. 449 |
| M195T571   | 195. 0647696 | 570. 599  | 2657839. 42  |
| M195T548   | 195. 0663176 | 547. 805  | 1346590. 102 |
| M195T528   | 195. 0635963 | 527. 688  | 2140729. 868 |
| M195T264   | 195. 0648931 | 264. 434  | 2416233. 552 |
| M195T450   | 195. 0662065 | 450. 052  | 1729230. 994 |
| M195T147   | 195. 0762613 | 147. 455  | 534329. 1176 |
| M195T399   | 195. 0762647 | 399. 086  | 579035. 5051 |
| M195T350   | 195. 0765771 | 350. 108  | 703494. 4595 |
| M195T384   | 195. 0762583 | 383. 727  | 350356. 2925 |
| M195T196   | 195. 0763659 | 195. 791  | 1064984. 264 |
| M195T318   | 195. 0765852 | 318. 232  | 2446845. 489 |
| M195T238   | 195. 0761297 | 238. 024  | 1345649. 65  |
| M195T284   | 195. 0760127 | 283. 634  | 1316802. 75  |
| M195T816   | 195. 0843111 | 815. 664  | 2282553. 547 |
| M196T661   | 195. 8099171 | 661. 453  | 3794567. 043 |
| M196T724   | 195. 8098973 | 724. 158  | 5185470. 404 |
| M196T690   | 195. 8098921 | 689. 75   | 8904069. 162 |
| M196T713   | 195. 8099007 | 713. 292  | 4477263. 138 |
| M196T272   | 195. 8541402 | 272. 312  | 9445122. 227 |
| M196T232   | 195. 8541429 | 231. 973  | 95069500. 55 |
| M196T282_1 | 195. 8541253 | 281. 942  | 13096303. 31 |
| M196T53    | 195. 904401  | 53. 4226  | 45945. 05031 |
| M196T43    | 195. 9045313 | 43. 02995 | 104205. 5056 |
| M196T36    | 195. 9044669 | 36. 0041  | 505334. 9638 |
| M196T65    | 195. 9049003 | 65. 4825  | 210282. 0993 |
| M196T77    | 195. 9257747 | 77. 2263  | 31835484. 7  |
| M196T136   | 196. 023829  | 135. 795  | 2951250. 883 |
| M196T175   | 196. 0238507 | 174. 576  | 4096759. 531 |
| M196T282_2 | 196. 0238796 | 281. 942  | 2765286. 066 |
| M196T84    | 196. 053105  | 83. 9405  | 46382733. 53 |
| M196T329   | 196. 0591599 | 328. 999  | 104899672. 6 |
| M196T106   | 196. 0603358 | 105. 537  | 2953405. 514 |
| M196T274   | 196. 060615  | 273. 82   | 3048066. 898 |
| M196T376   | 196. 0603703 | 376. 15   | 4218971. 11  |
| M196T343   | 196. 0605947 | 342. 819  | 11220860. 58 |
| M196T303   | 196. 0603062 | 303. 259  | 10237820. 47 |
| M196T464   | 196. 0684496 | 464. 011  | 1156499. 286 |
| M196T405   | 196. 0967403 | 405. 254  | 3986626. 91  |

|            |              |          |              |
|------------|--------------|----------|--------------|
| M197T73    | 196. 9749125 | 73. 3444 | 23651075. 07 |
| M197T663   | 196. 9833739 | 663. 008 | 7425650. 928 |
| M197T770   | 196. 9826934 | 770. 235 | 3624624. 049 |
| M197T790   | 196. 9826745 | 790. 161 | 2787894. 577 |
| M197T805   | 196. 9826848 | 805. 145 | 2897360. 054 |
| M197T822   | 196. 9826554 | 821. 831 | 3305050. 27  |
| M197T758   | 196. 9827242 | 757. 881 | 2973415. 657 |
| M197T814_1 | 196. 9826293 | 814. 118 | 4300961. 575 |
| M197T835_1 | 196. 9826922 | 835. 329 | 5640242. 213 |
| M197T140   | 197. 0079224 | 140. 209 | 1327158. 655 |
| M197T211   | 197. 0077455 | 210. 883 | 2824645. 799 |
| M197T199_1 | 197. 0076488 | 198. 821 | 1593786. 85  |
| M197T828   | 197. 0210567 | 827. 821 | 2884035. 629 |
| M197T723   | 197. 0228834 | 722. 604 | 2099894. 806 |
| M197T795   | 197. 0211393 | 794. 753 | 3633260. 128 |
| M197T117   | 197. 0207154 | 116. 52  | 13248120. 87 |
| M197T167   | 197. 0211486 | 167. 01  | 4916592. 081 |
| M197T776   | 197. 0211136 | 776. 391 | 5176790. 589 |
| M197T683   | 197. 0211339 | 682. 948 | 11174943. 22 |
| M197T736   | 197. 0212303 | 736. 458 | 4487050. 211 |
| M197T802   | 197. 021146  | 802. 116 | 3383945. 695 |
| M197T185   | 197. 0210329 | 185. 252 | 5104361. 264 |
| M197T146_1 | 197. 0214358 | 146. 08  | 5966755. 955 |
| M197T835_2 | 197. 0212416 | 835. 329 | 2798454. 533 |
| M197T814_2 | 197. 0211268 | 814. 118 | 5304722. 918 |
| M197T753   | 197. 0211044 | 753. 315 | 3805582. 502 |
| M197T329   | 197. 0428851 | 328. 999 | 4037529. 191 |
| M197T107   | 197. 0443198 | 106. 648 | 2021510. 055 |
| M197T299   | 197. 042747  | 298. 619 | 58094551. 59 |
| M197T146_2 | 197. 0444175 | 146. 08  | 4605293. 598 |
| M197T199_2 | 197. 0443625 | 198. 821 | 3830803. 671 |
| M197T202   | 197. 0555459 | 201. 897 | 825626. 2506 |
| M197T808   | 197. 0631962 | 808. 251 | 146543105. 7 |
| M197T747   | 197. 0681685 | 747. 194 | 130865776. 8 |
| M197T93    | 197. 065949  | 92. 9618 | 37808413. 33 |
| M197T410   | 197. 080967  | 409. 881 | 4283766. 212 |
| M197T399   | 197. 080993  | 399. 086 | 3110909. 036 |
| M197T583   | 197. 0806165 | 582. 96  | 1253471. 34  |
| M197T376   | 197. 080218  | 376. 15  | 4755889. 001 |
| M197T525   | 197. 0803523 | 524. 56  | 2231858. 585 |
| M197T522   | 197. 1170209 | 521. 5   | 1343651. 896 |
| M197T557   | 197. 1170203 | 557. 078 | 1538840. 851 |
| M197T540   | 197. 1170521 | 540. 152 | 1790891. 381 |
| M197T508   | 197. 1170665 | 507. 55  | 931264. 3752 |
| M197T592   | 197. 1170457 | 592. 284 | 2007515. 92  |
| M197T617   | 197. 1171247 | 616. 891 | 3904090. 235 |
| M198T661   | 197. 8066264 | 661. 453 | 4909990. 844 |
| M198T724   | 197. 8066165 | 724. 158 | 7160291. 961 |
| M198T740   | 197. 8066113 | 739. 509 | 5181615. 818 |
| M198T690   | 197. 806584  | 689. 75  | 11332331. 59 |
| M198T713   | 197. 8066152 | 713. 292 | 5595370. 21  |
| M198T232   | 197. 8502144 | 231. 973 | 119278603. 9 |
| M198T140   | 197. 8508518 | 140. 209 | 711743. 4509 |
| M198T272   | 197. 8508795 | 272. 312 | 13097547. 16 |

|            |              |           |              |
|------------|--------------|-----------|--------------|
| M198T282   | 197. 8508579 | 281. 942  | 15421372. 39 |
| M198T385_1 | 197. 9396727 | 385. 225  | 431856. 6215 |
| M198T364   | 198. 0030495 | 363. 928  | 1515542. 683 |
| M198T385_2 | 198. 0317741 | 385. 225  | 102660567. 8 |
| M198T147_1 | 198. 0397432 | 147. 455  | 1247363. 172 |
| M198T635   | 198. 0393363 | 635. 37   | 1445791. 75  |
| M198T161   | 198. 0396363 | 161. 184  | 1475482. 029 |
| M198T280   | 198. 0395631 | 280. 275  | 1950030. 993 |
| M198T299   | 198. 0449436 | 298. 619  | 2835568. 112 |
| M198T185   | 198. 0396955 | 185. 252  | 10356149. 51 |
| M198T57    | 198. 0688004 | 57. 25235 | 469120. 7203 |
| M198T64    | 198. 0687728 | 64. 0412  | 759116. 5317 |
| M198T808   | 198. 0688933 | 808. 251  | 1852081. 643 |
| M198T181   | 198. 0754708 | 180. 601  | 4073872. 527 |
| M198T71    | 198. 0688348 | 70. 607   | 1128206. 472 |
| M198T789   | 198. 0688724 | 788. 604  | 1675442. 698 |
| M198T747   | 198. 0688442 | 747. 194  | 7982521. 507 |
| M198T816   | 198. 0688995 | 815. 664  | 1373527. 846 |
| M198T43    | 198. 0687776 | 43. 4241  | 3184353. 856 |
| M198T826   | 198. 0688553 | 826. 333  | 2372749. 965 |
| M198T444   | 198. 0753682 | 443. 961  | 2724171. 482 |
| M198T779   | 198. 0688196 | 779. 407  | 2153630. 267 |
| M198T294   | 198. 0754229 | 294. 152  | 6067438. 851 |
| M198T718   | 198. 0688416 | 717. 942  | 2179219. 956 |
| M198T329   | 198. 0760019 | 328. 999  | 2780052. 092 |
| M198T223   | 198. 0755995 | 222. 943  | 5677607. 798 |
| M198T209   | 198. 0755658 | 209. 472  | 6332008. 901 |
| M198T353   | 198. 0760142 | 353. 163  | 1777109. 097 |
| M198T147_2 | 198. 0760106 | 147. 455  | 11954254. 03 |
| M198T660   | 198. 0759147 | 659. 904  | 240134. 6115 |
| M198T341   | 198. 0760175 | 341. 266  | 1713056. 031 |
| M198T425   | 198. 0760379 | 425. 439  | 1054163. 032 |
| M198T318   | 198. 0760149 | 318. 232  | 3879431. 28  |
| M198T170   | 198. 0758314 | 170. 049  | 8209254. 296 |
| M198T194   | 198. 0872905 | 194. 243  | 9088855. 38  |
| M198T240   | 198. 0873053 | 239. 574  | 6107787. 68  |
| M198T163   | 198. 098537  | 162. 615  | 782732. 627  |
| M198T413   | 198. 1123202 | 413. 006  | 534830. 1407 |
| M198T430   | 198. 1123269 | 429. 94   | 421787. 2359 |
| M198T617   | 198. 1204454 | 616. 891  | 417644. 6648 |
| M198T387   | 198. 1210011 | 386. 78   | 419650. 3141 |
| M199T253   | 198. 8519004 | 252. 703  | 2817160. 498 |
| M199T229   | 198. 8517255 | 228. 961  | 3641204. 65  |
| M199T268   | 198. 8517629 | 268. 419  | 516241. 0964 |
| M199T281   | 198. 8517934 | 281. 097  | 1063996. 777 |
| M199T85    | 198. 941222  | 85. 0169  | 2830449. 871 |
| M199T117   | 199. 018104  | 116. 52   | 5792617. 164 |
| M199T297   | 199. 0202133 | 297. 149  | 902975. 2163 |
| M199T185   | 199. 0179919 | 185. 252  | 2432251. 564 |
| M199T147   | 199. 0233964 | 147. 455  | 3812469. 014 |
| M199T221   | 199. 0234849 | 221. 453  | 1139345. 93  |
| M199T197   | 199. 0584955 | 197. 335  | 5757632. 458 |
| M199T370   | 199. 0601216 | 370. 115  | 1463729. 729 |
| M199T318   | 199. 0601399 | 318. 232  | 4806580. 53  |

|           |             |         |             |
|-----------|-------------|---------|-------------|
| M199T178  | 199.060015  | 177.649 | 3936552.545 |
| M199T385  | 199.0585533 | 385.225 | 3654604.951 |
| M199T49   | 199.0705594 | 49.25   | 99005.24247 |
| M199T60   | 199.0705823 | 60.4002 | 196517.0136 |
| M199T65   | 199.0705645 | 65.4825 | 186814.2262 |
| M199T106  | 199.0713173 | 105.537 | 6302994.611 |
| M199T31_1 | 199.0707407 | 31.4228 | 330959.8536 |
| M199T208  | 199.0793628 | 207.935 | 370031.1855 |
| M199T194  | 199.0908071 | 194.243 | 608317.6263 |
| M199T580  | 199.0966651 | 579.883 | 1871489.832 |
| M199T369  | 199.0965667 | 368.559 | 4153458.279 |
| M199T393  | 199.0965869 | 392.905 | 9106290.64  |
| M199T350  | 199.0965227 | 350.108 | 3018666.564 |
| M199T462  | 199.0965867 | 462.446 | 1971535.095 |
| M199T408  | 199.0965909 | 408.368 | 3913799.709 |
| M199T428  | 199.0965613 | 428.448 | 2513637.959 |
| M199T539  | 199.132583  | 538.619 | 1489073.591 |
| M199T559  | 199.1326273 | 558.574 | 3067855.653 |
| M199T668  | 199.1326617 | 667.612 | 1390507.685 |
| M199T551  | 199.1326102 | 550.932 | 9302347.207 |
| M199T635  | 199.132588  | 635.37  | 3668835.463 |
| M199T517  | 199.1326437 | 516.908 | 992486.738  |
| M199T614  | 199.132588  | 613.824 | 5879916.611 |
| M199T591  | 199.1326955 | 590.717 | 2215821.198 |
| M199T684  | 199.1326359 | 684.499 | 3405215.04  |
| M199T657  | 199.1325262 | 656.84  | 1069168.337 |
| M199T31_2 | 199.1694927 | 31.4228 | 88385.21976 |
| M200T661  | 199.8038891 | 661.453 | 2525890.269 |
| M200T724  | 199.8039767 | 724.158 | 3249486.956 |
| M200T677  | 199.8037986 | 676.878 | 2052584.263 |
| M200T61   | 199.8485755 | 61.4369 | 272219.6877 |
| M200T272  | 199.8486478 | 272.312 | 9402845.097 |
| M200T229  | 199.8486627 | 228.961 | 27667754.08 |
| M200T252  | 199.8486723 | 251.727 | 13541932.72 |
| M200T282  | 199.8487039 | 281.942 | 8443905.027 |
| M200T36   | 199.8483888 | 36.0041 | 289603.5127 |
| M200T481  | 199.9744991 | 481.089 | 92252.7494  |
| M200T473  | 199.9745023 | 473.329 | 167226.1606 |
| M200T439  | 200.0188865 | 439.27  | 1382096.725 |
| M200T81   | 200.055185  | 80.6174 | 25103125.13 |
| M200T106  | 200.0552148 | 105.537 | 11342055.55 |
| M200T209  | 200.0552758 | 209.472 | 4068794.206 |
| M200T172  | 200.0552371 | 171.546 | 12286015.93 |
| M200T321  | 200.0553232 | 321.312 | 2332283.485 |
| M200T294  | 200.0554527 | 294.152 | 790253.5677 |
| M200T92   | 200.0552457 | 91.9113 | 70144322.8  |
| M200T146  | 200.0536792 | 146.08  | 8015542.209 |
| M200T191  | 200.0552489 | 191.259 | 6091336.544 |
| M200T456  | 200.0916146 | 456.2   | 1294629.054 |
| M200T147  | 200.091292  | 147.455 | 2786600.684 |
| M200T373  | 200.0915494 | 373.196 | 2595619.967 |
| M200T399  | 200.0916293 | 399.086 | 1769427.584 |
| M200T422  | 200.0915316 | 422.362 | 3042016.162 |
| M200T358  | 200.0916599 | 357.746 | 1641290.511 |



|            |             |         |             |
|------------|-------------|---------|-------------|
| M200T296   | 200.0915235 | 295.704 | 3110830.837 |
| M200T334   | 200.0916087 | 333.655 | 1659809.476 |
| M200T312   | 200.0915554 | 312.058 | 2058671.104 |
| M200T302   | 200.1037256 | 301.725 | 1397630.158 |
| M200T53    | 200.1278096 | 52.827  | 61120.43501 |
| M200T60    | 200.1277672 | 59.8865 | 135245.9321 |
| M200T65    | 200.1278061 | 65.0166 | 94618.1128  |
| M200T436   | 200.128301  | 436.18  | 1136292.023 |
| M200T43    | 200.1277932 | 43.4241 | 330936.4548 |
| M200T453   | 200.1283576 | 453.126 | 1923194.66  |
| M200T462   | 200.1282438 | 462.446 | 852045.341  |
| M201T251   | 200.8488054 | 251.004 | 968377.2184 |
| M201T257   | 200.849205  | 257.001 | 476090.0006 |
| M201T273   | 200.8492802 | 273.232 | 410585.1049 |
| M201T267   | 200.8492335 | 266.709 | 552108.8345 |
| M201T280   | 200.8493043 | 279.68  | 329704.1621 |
| M201T226   | 200.8486984 | 225.965 | 2480609.174 |
| M201T787   | 200.9538535 | 787.078 | 3123337.351 |
| M201T122   | 201.0141182 | 122.381 | 2713620.764 |
| M201T136   | 201.0141021 | 135.795 | 5238691.916 |
| M201T115   | 201.0141266 | 115.123 | 1653478.436 |
| M201T166   | 201.0392439 | 165.522 | 2228477.165 |
| M201T121   | 201.0391704 | 120.945 | 2939391.365 |
| M201T106   | 201.039207  | 105.537 | 4792227.728 |
| M201T87    | 201.0391062 | 87.426  | 73980677.88 |
| M201T134   | 201.0391905 | 134.253 | 1378100.016 |
| M201T381   | 201.0391622 | 380.608 | 741253.0448 |
| M201T146   | 201.0392946 | 146.08  | 3747775.309 |
| M201T709   | 201.0655357 | 708.697 | 2950951.41  |
| M201T221_1 | 201.0756847 | 221.453 | 2487487.865 |
| M201T188   | 201.0756622 | 188.174 | 2419044.789 |
| M201T347   | 201.0761599 | 347.166 | 1751598.597 |
| M201T367   | 201.0871594 | 367.026 | 263681.377  |
| M201T107   | 201.0868147 | 106.648 | 1592203.115 |
| M201T413   | 201.1121244 | 413.006 | 4546081.339 |
| M201T500   | 201.1121588 | 499.759 | 2990666.153 |
| M201T447   | 201.1120465 | 446.967 | 3833864.628 |
| M201T365   | 201.1121251 | 365.475 | 9550640.873 |
| M201T396   | 201.112107  | 396.023 | 4236847.755 |
| M201T511   | 201.1121696 | 510.673 | 2797264.145 |
| M201T385   | 201.1121426 | 385.225 | 4583899.345 |
| M201T428   | 201.1124349 | 428.448 | 40243715.88 |
| M201T221_2 | 201.1229834 | 221.453 | 8290448.797 |
| M201T197   | 201.1229583 | 197.335 | 11614425.18 |
| M201T578   | 201.1486626 | 578.353 | 5242528.252 |
| M201T666   | 201.1481375 | 666.058 | 1242990.4   |
| M201T594   | 201.1486739 | 593.841 | 2724325.047 |
| M201T675   | 201.1482065 | 675.322 | 1203129.345 |
| M202T249   | 201.8467309 | 248.622 | 3569161.685 |
| M202T254   | 201.8466925 | 253.674 | 2944287.493 |
| M202T243   | 201.8466997 | 243.386 | 2845430.103 |
| M202T277   | 201.8467238 | 277.42  | 10283704.11 |
| M202T231   | 201.846665  | 230.507 | 7477404.887 |
| M202T769   | 201.9050875 | 768.696 | 1003509.102 |

|          |              |          |              |
|----------|--------------|----------|--------------|
| M202T795 | 201. 9050843 | 794. 753 | 1430846. 008 |
| M202T817 | 201. 9051338 | 817. 214 | 1621188. 891 |
| M202T835 | 201. 9050911 | 835. 329 | 1675085. 026 |
| M202T89  | 202. 0197051 | 88. 8247 | 2143429. 339 |
| M202T197 | 202. 0280056 | 197. 335 | 145349. 9325 |
| M202T349 | 202. 0497833 | 348. 668 | 676059. 2988 |
| M202T598 | 202. 0496091 | 598. 341 | 593219. 2976 |
| M202T506 | 202. 0497604 | 505. 99  | 1411237. 229 |
| M202T654 | 202. 0493143 | 653. 835 | 2277522. 218 |
| M202T617 | 202. 0497188 | 616. 891 | 1336894. 066 |
| M202T106 | 202. 0710202 | 105. 537 | 9655881. 564 |
| M202T293 | 202. 0711032 | 292. 621 | 2250732. 655 |
| M202T172 | 202. 0709591 | 171. 546 | 5381534. 312 |
| M202T83  | 202. 0707901 | 82. 8986 | 8526015. 449 |
| M202T91  | 202. 07085   | 90. 9026 | 5670302. 347 |
| M202T146 | 202. 0708936 | 146. 08  | 6008251. 051 |
| M202T220 | 202. 0711284 | 219. 979 | 2291443. 345 |
| M202T147 | 202. 1073352 | 147. 455 | 1145340. 201 |
| M202T217 | 202. 1072407 | 216. 95  | 13949845. 75 |
| M202T240 | 202. 1072216 | 239. 574 | 18811007. 92 |
| M202T428 | 202. 1153179 | 428. 448 | 3865264. 471 |
| M203T73  | 202. 997914  | 73. 3444 | 18120725. 36 |
| M203T114 | 203. 0034034 | 113. 762 | 4237358. 501 |
| M203T87  | 203. 0033246 | 87. 426  | 28863401. 53 |
| M203T556 | 203. 0339274 | 555. 524 | 964109. 9452 |
| M203T102 | 203. 0548883 | 101. 563 | 11648924. 64 |
| M203T206 | 203. 0547357 | 206. 399 | 3825533. 817 |
| M203T155 | 203. 0548455 | 155. 033 | 9781529. 148 |
| M203T170 | 203. 0546611 | 170. 049 | 6547990. 318 |
| M203T83  | 203. 0661209 | 82. 8986 | 5416961. 604 |
| M203T90  | 203. 06629   | 89. 8937 | 4590431. 55  |
| M203T376 | 203. 0815842 | 376. 15  | 82757996. 92 |
| M203T223 | 203. 0911856 | 222. 943 | 4537668. 977 |
| M203T209 | 203. 0911466 | 209. 472 | 5403442. 613 |
| M203T447 | 203. 0911776 | 446. 967 | 895708. 1894 |
| M203T430 | 203. 0911961 | 429. 94  | 1518869. 581 |
| M203T106 | 203. 1026051 | 105. 537 | 5711101. 166 |
| M203T238 | 203. 1106287 | 238. 024 | 1512055. 69  |
| M203T218 | 203. 1107176 | 218. 43  | 1065590. 338 |
| M203T390 | 203. 1274945 | 389. 839 | 1376414. 818 |
| M203T375 | 203. 1278734 | 374. 746 | 2564130. 292 |
| M203T416 | 203. 1282074 | 416. 128 | 2596477. 429 |
| M203T72  | 203. 4991984 | 72. 0941 | 1332613. 744 |
| M204T89  | 204. 0074546 | 88. 8247 | 921509. 441  |
| M204T452 | 204. 0290756 | 451. 616 | 443853. 3469 |
| M204T79  | 204. 0501337 | 79. 4105 | 7860008. 405 |
| M204T707 | 204. 0652697 | 707. 143 | 1081901. 927 |
| M204T427 | 204. 0657417 | 426. 913 | 872380. 3508 |
| M204T543 | 204. 0646813 | 543. 216 | 21487992. 95 |
| M204T487 | 204. 0653959 | 487. 329 | 9113310. 979 |
| M204T462 | 204. 0653867 | 462. 446 | 1864838. 735 |
| M204T394 | 204. 0656944 | 394. 467 | 3909924. 806 |
| M204T232 | 204. 0767393 | 231. 973 | 2410870. 906 |
| M204T187 | 204. 0868009 | 186. 689 | 2376629. 336 |

|            |              |          |              |
|------------|--------------|----------|--------------|
| M205T588   | 204. 9452555 | 587. 595 | 1185044. 756 |
| M205T554   | 204. 9453892 | 554. 027 | 8597897. 013 |
| M205T813   | 205. 0337037 | 812. 68  | 4994733. 233 |
| M205T767   | 205. 0338108 | 767. 145 | 6062341. 488 |
| M205T747   | 205. 0337837 | 747. 194 | 13164620. 68 |
| M205T730   | 205. 0336779 | 730. 264 | 11154404. 29 |
| M205T805   | 205. 0336854 | 805. 145 | 7017145. 435 |
| M205T710   | 205. 0336163 | 710. 246 | 8580484. 629 |
| M205T792   | 205. 0336046 | 791. 678 | 6418301. 264 |
| M205T83    | 205. 034115  | 82. 8986 | 261232564. 3 |
| M205T700   | 205. 0338863 | 699. 592 | 7919988. 152 |
| M205T784   | 205. 0339653 | 784. 051 | 5249777. 937 |
| M205T825   | 205. 0338478 | 824. 864 | 5921185. 154 |
| M205T835   | 205. 0336161 | 835. 329 | 3672459. 958 |
| M205T706   | 205. 04969   | 705. 593 | 554781. 083  |
| M205T288   | 205. 0494438 | 287. 981 | 1619612. 75  |
| M205T494   | 205. 0494354 | 493. 56  | 1288238. 454 |
| M205T300   | 205. 0489764 | 300. 176 | 2331193. 584 |
| M205T532   | 205. 0493876 | 532. 372 | 4235824. 404 |
| M205T543   | 205. 0692187 | 543. 216 | 2901825. 608 |
| M205T302   | 205. 0707926 | 301. 725 | 1792355. 857 |
| M205T486   | 205. 0693485 | 485. 784 | 1291145. 592 |
| M205T146   | 205. 0706934 | 146. 08  | 2387347. 348 |
| M205T750   | 205. 0858581 | 750. 298 | 897844. 016  |
| M205T594   | 205. 0856601 | 593. 841 | 2843741. 514 |
| M205T433   | 205. 1071654 | 433. 06  | 3439791. 982 |
| M206T83    | 206. 0373543 | 82. 8986 | 16753556. 91 |
| M206T206   | 206. 0444554 | 206. 399 | 598869. 5408 |
| M206T563   | 206. 0448651 | 562. 946 | 3087528. 057 |
| M206T334   | 206. 0444084 | 333. 655 | 7228849. 269 |
| M206T84    | 206. 0658076 | 83. 9405 | 4358800. 431 |
| M206T91    | 206. 0657695 | 90. 9026 | 2988210. 95  |
| M206T312   | 206. 0665583 | 312. 058 | 2794713. 364 |
| M206T472   | 206. 0807012 | 471. 768 | 1281374. 48  |
| M206T232   | 206. 0809447 | 231. 973 | 8991501. 598 |
| M206T373   | 206. 0811989 | 373. 196 | 876633. 4392 |
| M206T660   | 206. 0809195 | 659. 904 | 1017474. 997 |
| M206T337   | 206. 0812598 | 336. 681 | 2403512. 687 |
| M206T635   | 206. 0809047 | 635. 37  | 1321102. 599 |
| M206T394   | 206. 0817681 | 394. 467 | 6511136. 168 |
| M207T556   | 206. 9422342 | 555. 524 | 5477010. 845 |
| M207T769   | 206. 9514412 | 768. 696 | 1637556. 129 |
| M207T707   | 206. 9513749 | 707. 143 | 1335609. 031 |
| M207T727   | 206. 9514416 | 727. 22  | 1478579. 287 |
| M207T665   | 206. 9514471 | 664. 565 | 1371970. 725 |
| M207T755   | 206. 9512975 | 754. 814 | 1836103. 651 |
| M207T746   | 206. 9513716 | 745. 747 | 1418471. 631 |
| M207T655   | 206. 9511191 | 655. 321 | 1333798. 853 |
| M207T688_1 | 206. 9512383 | 688. 189 | 2200341. 789 |
| M207T738   | 206. 9513535 | 737. 955 | 1255631. 907 |
| M207T716   | 206. 9514069 | 716. 391 | 1854534. 318 |
| M207T674   | 206. 9512821 | 673. 771 | 1399501. 624 |
| M207T804   | 206. 9513186 | 803. 615 | 5304082. 708 |
| M207T698   | 206. 9513928 | 698. 034 | 1374859. 408 |

|            |              |          |              |
|------------|--------------|----------|--------------|
| M207T784   | 206. 9513543 | 784. 051 | 2121057. 743 |
| M207T108   | 206. 9511205 | 108. 082 | 5444037. 329 |
| M207T835   | 206. 9512925 | 835. 329 | 4774499. 232 |
| M207T276   | 207. 0524202 | 275. 643 | 63783292. 69 |
| M207T266   | 207. 0460965 | 265. 541 | 145118479. 3 |
| M207T623   | 207. 0524343 | 623. 098 | 200067065. 1 |
| M207T187   | 207. 0461094 | 186. 689 | 755590580. 8 |
| M207T433   | 207. 0526721 | 433. 06  | 169833192. 4 |
| M207T600   | 207. 0524129 | 599. 904 | 184387643. 9 |
| M207T106   | 207. 0463792 | 105. 537 | 641134101. 4 |
| M207T346   | 207. 0456843 | 345. 761 | 205082971. 7 |
| M207T117   | 207. 0524825 | 116. 52  | 273553689. 8 |
| M207T84    | 207. 0464644 | 83. 9405 | 69615959. 05 |
| M207T449   | 207. 0456746 | 448. 527 | 210752799. 2 |
| M207T94    | 207. 0467522 | 94. 1615 | 347542403. 2 |
| M207T540   | 207. 052471  | 540. 152 | 278698769. 6 |
| M207T234   | 207. 0524195 | 233. 519 | 234295281. 4 |
| M207T724   | 207. 045716  | 724. 158 | 1367347772   |
| M207T688_2 | 207. 0458112 | 688. 189 | 559320187. 5 |
| M207T494   | 207. 0524517 | 493. 56  | 890214740. 4 |
| M207T246   | 207. 0457759 | 246. 013 | 124615552. 3 |
| M207T321   | 207. 0525505 | 321. 312 | 200184990. 3 |
| M207T332   | 207. 0525141 | 332. 105 | 186511517. 3 |
| M207T811   | 207. 0460662 | 811. 292 | 2209609681   |
| M207T577   | 207. 0525599 | 576. 787 | 687327725. 8 |
| M207T294   | 207. 0526768 | 294. 152 | 129682623. 8 |
| M207T161   | 207. 0461522 | 161. 184 | 318383462. 4 |
| M207T634   | 207. 0524056 | 633. 832 | 291979188. 6 |
| M207T286   | 207. 0526149 | 286. 433 | 181821399. 2 |
| M207T424   | 207. 0523986 | 423. 877 | 154128895. 9 |
| M207T387   | 207. 0457686 | 386. 78  | 455468803. 9 |
| M207T657   | 207. 0455408 | 656. 84  | 184290511. 3 |
| M207T254   | 207. 0524304 | 253. 674 | 152565736    |
| M207T526   | 207. 0524265 | 526. 124 | 191652173    |
| M207T359   | 207. 0525415 | 359. 297 | 153403393. 5 |
| M207T303   | 207. 0524453 | 303. 259 | 244285708. 9 |
| M207T137   | 207. 0455883 | 137. 226 | 537651991. 4 |
| M207T810   | 207. 1012998 | 809. 797 | 773545. 959  |
| M207T834   | 207. 1489857 | 833. 866 | 1691431. 328 |
| M207T795   | 207. 1485148 | 794. 753 | 3456688. 886 |
| M207T109   | 207. 1480117 | 109. 475 | 4211679. 597 |
| M208T272   | 208. 0540523 | 271. 596 | 7481999. 983 |
| M208T276   | 208. 0541271 | 276. 104 | 6491732. 701 |
| M208T267   | 208. 0540494 | 266. 709 | 15882071. 23 |
| M208T645   | 208. 0515081 | 644. 722 | 15927871. 76 |
| M208T651   | 208. 0539968 | 650. 74  | 14209480. 15 |
| M208T623   | 208. 0540688 | 623. 098 | 22141974. 92 |
| M208T601   | 208. 0540998 | 601. 473 | 21121305. 1  |
| M208T433   | 208. 0516769 | 433. 06  | 15170252. 27 |
| M208T187   | 208. 0534504 | 186. 689 | 24496695. 34 |
| M208T309   | 208. 0539383 | 309. 091 | 15070011. 18 |
| M208T411   | 208. 0540627 | 411. 444 | 22517742. 08 |
| M208T661   | 208. 0539336 | 661. 453 | 31974086. 08 |
| M208T349   | 208. 0540873 | 348. 668 | 86175293. 96 |

|            |             |         |             |
|------------|-------------|---------|-------------|
| M208T245   | 208.0540462 | 245.353 | 14259735.47 |
| M208T124   | 208.0541706 | 123.792 | 32704771.2  |
| M208T472_1 | 208.0541677 | 471.768 | 16359418.28 |
| M208T167   | 208.0541708 | 167.01  | 18494910.47 |
| M208T495   | 208.0540699 | 495.125 | 54128264.3  |
| M208T221   | 208.0541182 | 221.453 | 15427004.16 |
| M208T578   | 208.0516174 | 578.353 | 56319738.69 |
| M208T724   | 208.0539206 | 724.158 | 17727121.94 |
| M208T442   | 208.054127  | 442.399 | 17765775.2  |
| M208T205   | 208.0541543 | 204.895 | 22155312.25 |
| M208T94    | 208.0535166 | 94.1615 | 31671435.51 |
| M208T158   | 208.0539756 | 158.1   | 22748108.04 |
| M208T540   | 208.0541573 | 540.152 | 30140912.73 |
| M208T107   | 208.0534057 | 106.648 | 61846129.26 |
| M208T688   | 208.0540424 | 688.189 | 24470695.14 |
| M208T556   | 208.0541078 | 555.524 | 24126390.75 |
| M208T715   | 208.0538549 | 714.841 | 31542298.42 |
| M208T214   | 208.0540623 | 213.897 | 17676425.45 |
| M208T255   | 208.054055  | 255.113 | 17133685.06 |
| M208T425   | 208.0541157 | 425.439 | 14700963.01 |
| M208T175   | 208.0541539 | 174.576 | 27355474.02 |
| M208T611   | 208.0540164 | 610.742 | 22179463.36 |
| M208T696   | 208.0541889 | 695.893 | 20753707.55 |
| M208T732   | 208.0540451 | 731.793 | 24967004.34 |
| M208T285   | 208.054024  | 285.167 | 18729269.36 |
| M208T675   | 208.0538652 | 675.322 | 30250202.98 |
| M208T149   | 208.0540973 | 148.981 | 22311165.11 |
| M208T634   | 208.0541697 | 633.832 | 25857008.68 |
| M208T462   | 208.0541676 | 462.446 | 16085102.37 |
| M208T294   | 208.0540343 | 294.152 | 12584551.14 |
| M208T235   | 208.0540558 | 234.972 | 28249726.5  |
| M208T394   | 208.0539288 | 394.467 | 20220609.89 |
| M208T526   | 208.0540465 | 526.124 | 19374441.93 |
| M208T385   | 208.0539772 | 385.225 | 13954522.18 |
| M208T814   | 208.0513603 | 814.118 | 279078704.9 |
| M208T137   | 208.0541142 | 137.226 | 41318465.65 |
| M208T375   | 208.0962011 | 374.746 | 2647051.246 |
| M208T472_2 | 208.0967757 | 471.768 | 968981.8359 |
| M208T831   | 208.0966271 | 830.813 | 1854670.172 |
| M208T317   | 208.096592  | 316.709 | 998459.1218 |
| M208T365   | 208.0970549 | 365.475 | 1180191.283 |
| M208T430   | 208.0967654 | 429.94  | 1294591.694 |
| M208T511   | 208.0968932 | 510.673 | 5355151.739 |
| M208T486   | 208.0968404 | 485.784 | 2087095.162 |
| M208T501   | 208.0968898 | 501.318 | 4665003.44  |
| M208T461   | 208.0969052 | 460.89  | 782644.2847 |
| M209T48    | 208.9351749 | 47.718  | 185510.018  |
| M209T61    | 208.9351418 | 61.4369 | 727110.5437 |
| M209T36    | 208.9351161 | 36.0041 | 503588.1875 |
| M209T556   | 208.939793  | 555.524 | 806210.5019 |
| M209T272   | 208.9937878 | 271.596 | 1315617.374 |
| M209T365_1 | 209.0081317 | 365.475 | 3427882.491 |
| M209T413   | 209.044661  | 413.006 | 6180561.459 |
| M209T539_1 | 209.0437427 | 538.619 | 9430742.762 |

|            |              |          |              |
|------------|--------------|----------|--------------|
| M209T456   | 209. 0446977 | 456. 2   | 6080253. 41  |
| M209T472   | 209. 0437784 | 471. 768 | 2300252. 618 |
| M209T346   | 209. 0447625 | 345. 761 | 19868285. 1  |
| M209T293   | 209. 0445923 | 292. 621 | 3409889. 246 |
| M209T337   | 209. 044806  | 336. 681 | 18447109. 69 |
| M209T136   | 209. 0446021 | 135. 795 | 4158177. 76  |
| M209T483   | 209. 0463822 | 482. 656 | 5079676. 801 |
| M209T494   | 209. 0438406 | 493. 56  | 3158019. 653 |
| M209T365_2 | 209. 0437231 | 365. 475 | 11171137. 71 |
| M209T441   | 209. 0438619 | 440. 833 | 5958643. 236 |
| M209T425_1 | 209. 0436667 | 425. 439 | 4835249. 23  |
| M209T402   | 209. 0437004 | 402. 144 | 4279038. 975 |
| M209T394   | 209. 0446734 | 394. 467 | 5197222. 247 |
| M209T381   | 209. 0437599 | 380. 608 | 7620712. 904 |
| M209T211   | 209. 0439529 | 210. 883 | 8454275. 492 |
| M209T828   | 209. 0548083 | 827. 821 | 16001715. 57 |
| M209T811   | 209. 0547759 | 811. 292 | 4689098. 945 |
| M209T169   | 209. 0550378 | 168. 507 | 10348050. 98 |
| M209T798   | 209. 054818  | 797. 757 | 6113360. 361 |
| M209T773   | 209. 054865  | 773. 333 | 4963093. 218 |
| M209T782   | 209. 0548407 | 782. 5   | 5336334. 586 |
| M209T242   | 209. 0660786 | 242. 223 | 4804631. 038 |
| M209T246   | 209. 0660274 | 246. 474 | 4356362. 716 |
| M209T309   | 209. 0656879 | 309. 091 | 4701293. 59  |
| M209T581   | 209. 0660269 | 581. 442 | 9437198. 592 |
| M209T539_2 | 209. 0660928 | 538. 619 | 23232232. 65 |
| M209T349   | 209. 0659808 | 348. 668 | 25211163. 58 |
| M209T106   | 209. 0654571 | 105. 537 | 78796515. 95 |
| M209T209   | 209. 0659914 | 209. 472 | 18136047. 35 |
| M209T514   | 209. 0660339 | 513. 768 | 8135248. 147 |
| M209T744   | 209. 0660659 | 744. 192 | 25898678. 95 |
| M209T665   | 209. 0659977 | 664. 565 | 5725948. 624 |
| M209T302   | 209. 065782  | 301. 725 | 5677082. 601 |
| M209T410   | 209. 0660411 | 409. 881 | 7803058. 839 |
| M209T680   | 209. 0659458 | 679. 873 | 13676617. 43 |
| M209T609   | 209. 0659308 | 609. 19  | 17872163. 26 |
| M209T266   | 209. 0660307 | 265. 541 | 5584972. 619 |
| M209T85    | 209. 0654485 | 85. 0169 | 60122025. 66 |
| M209T393   | 209. 0657948 | 392. 905 | 7138248. 921 |
| M209T234   | 209. 0657807 | 233. 519 | 6370932. 333 |
| M209T470   | 209. 0659301 | 470. 253 | 7861427. 841 |
| M209T568   | 209. 0658241 | 567. 543 | 7001716. 956 |
| M209T255   | 209. 0658555 | 255. 113 | 5572213. 987 |
| M209T816   | 209. 0659129 | 815. 664 | 6639828. 089 |
| M209T792   | 209. 0659183 | 791. 678 | 16624729. 06 |
| M209T634   | 209. 0660393 | 633. 832 | 17428554. 19 |
| M209T318   | 209. 0659875 | 318. 232 | 7294919. 53  |
| M209T280   | 209. 0659534 | 280. 275 | 13930878. 48 |
| M209T700   | 209. 0661225 | 699. 592 | 10457296. 45 |
| M209T657   | 209. 0659599 | 656. 84  | 7933230. 174 |
| M209T713   | 209. 0658762 | 713. 292 | 7714327. 608 |
| M209T825   | 209. 0660679 | 824. 864 | 6950740. 324 |
| M209T490   | 209. 0659755 | 490. 434 | 13694606. 66 |
| M209T835   | 209. 0658191 | 835. 329 | 4741345. 545 |

|            |             |         |             |
|------------|-------------|---------|-------------|
| M209T439   | 209.0661036 | 439.27  | 15279335.01 |
| M209T645   | 209.0816733 | 644.722 | 623622.545  |
| M209T370   | 209.0784163 | 370.115 | 1144901.909 |
| M209T362   | 209.0805529 | 362.384 | 997762.3054 |
| M209T425_2 | 209.080543  | 425.439 | 3747091.152 |
| M209T387   | 209.0805345 | 386.78  | 627942.7932 |
| M209T526   | 209.0805743 | 526.124 | 601354.2848 |
| M209T291   | 209.0916471 | 291.076 | 891280.204  |
| M209T314   | 209.0918647 | 313.612 | 1089200.072 |
| M209T372   | 209.091955  | 371.633 | 1477287.94  |
| M209T528   | 209.1174174 | 527.688 | 1553437.042 |
| M210T131   | 209.9477945 | 131.207 | 1684672.008 |
| M210T792   | 209.9468481 | 791.678 | 3754448.925 |
| M210T801   | 209.9475918 | 800.683 | 2358863.419 |
| M210T690   | 209.9470697 | 689.75  | 90275774.29 |
| M210T776   | 209.9483663 | 776.391 | 8561608.409 |
| M210T766   | 209.9483705 | 765.588 | 9968660.434 |
| M210T811   | 209.9483853 | 811.292 | 2117293.134 |
| M210T740   | 209.9484833 | 739.509 | 14270355.47 |
| M210T726   | 209.9484998 | 725.713 | 17647249.06 |
| M210T753   | 209.9484921 | 753.315 | 12879058.24 |
| M210T112   | 210.0242023 | 112.287 | 3713884.057 |
| M210T196   | 210.0397801 | 195.791 | 1913484.163 |
| M210T346   | 210.0476695 | 345.761 | 1699088.521 |
| M210T238   | 210.05079   | 238.024 | 517187.7516 |
| M210T672   | 210.0580012 | 672.229 | 359369.8305 |
| M210T85    | 210.0689187 | 85.0169 | 3865905.825 |
| M210T258   | 210.0754849 | 258.208 | 2653439.942 |
| M210T413   | 210.0763967 | 413.006 | 4675646.575 |
| M210T327   | 210.0761517 | 327.449 | 12888887.6  |
| M210T369   | 210.0761573 | 368.559 | 175831310.6 |
| M210T398   | 210.0758644 | 397.585 | 5982794.766 |
| M210T447   | 210.0757512 | 446.967 | 1544357.989 |
| M210T294   | 210.0758544 | 294.152 | 10845424.33 |
| M210T381   | 210.0761817 | 380.608 | 13717551.09 |
| M210T290   | 210.086304  | 289.534 | 75214201.15 |
| M210T302   | 210.0863505 | 301.725 | 43220160.35 |
| M210T178   | 210.0870193 | 177.649 | 21582435.93 |
| M210T464   | 210.1119669 | 464.011 | 1478508.139 |
| M211T663   | 210.9482745 | 663.008 | 2394007.431 |
| M211T724   | 210.9483499 | 724.158 | 4996358.496 |
| M211T697   | 210.9483264 | 697.061 | 1760786.636 |
| M211T114   | 210.9485291 | 113.762 | 1359390.081 |
| M211T690   | 210.9487993 | 689.75  | 1878983.609 |
| M211T83    | 210.9484943 | 82.8986 | 4643067.366 |
| M211T677   | 210.9483576 | 676.878 | 2165650.969 |
| M211T143   | 211.0183427 | 143.174 | 1439966.582 |
| M211T337   | 211.02362   | 336.681 | 1600560.262 |
| M211T396   | 211.0237604 | 396.023 | 978283.3795 |
| M211T91    | 211.0234076 | 90.9026 | 7374120.052 |
| M211T408   | 211.0236842 | 408.368 | 605400.29   |
| M211T115   | 211.0236332 | 115.123 | 4335161.187 |
| M211T170   | 211.0236557 | 170.049 | 2160563.115 |
| M211T398   | 211.0600878 | 397.585 | 12201767.24 |

|            |              |          |              |
|------------|--------------|----------|--------------|
| M211T297   | 211. 0601063 | 297. 149 | 8177612. 47  |
| M211T173   | 211. 0601166 | 173. 092 | 3983032. 983 |
| M211T178   | 211. 0709816 | 177. 649 | 15037887. 95 |
| M211T202   | 211. 0711255 | 201. 897 | 3258988. 67  |
| M211T158   | 211. 0710231 | 158. 1   | 1956475. 802 |
| M211T369   | 211. 0796652 | 368. 559 | 19087779. 44 |
| M211T294   | 211. 0792969 | 294. 152 | 955174. 4488 |
| M211T798   | 211. 0792215 | 797. 757 | 816913. 125  |
| M211T669_1 | 211. 0837777 | 669. 12  | 1971531. 904 |
| M211T290   | 211. 0909012 | 289. 534 | 6771817. 835 |
| M211T179   | 211. 0905615 | 179. 046 | 1772385. 784 |
| M211T472   | 211. 0963557 | 471. 768 | 1454223. 969 |
| M211T506   | 211. 0963733 | 505. 99  | 2735368. 323 |
| M211T385   | 211. 0964295 | 385. 225 | 984882. 3715 |
| M211T810   | 211. 1328889 | 809. 797 | 2301137. 846 |
| M211T817   | 211. 1328494 | 817. 214 | 1625593. 41  |
| M211T669_2 | 211. 1326466 | 669. 12  | 870105. 4192 |
| M211T614   | 211. 1327692 | 613. 824 | 1332807. 26  |
| M211T759   | 211. 1327956 | 759. 428 | 761295. 4149 |
| M211T531   | 211. 1326787 | 530. 804 | 883621. 8962 |
| M211T628   | 211. 1327118 | 627. 731 | 1769864. 231 |
| M212T577   | 211. 8814646 | 576. 787 | 351332. 6242 |
| M212T663   | 211. 9455382 | 663. 008 | 1984771. 788 |
| M212T766   | 211. 9493712 | 765. 588 | 237114. 4651 |
| M212T697   | 211. 9452097 | 697. 061 | 1953504. 413 |
| M212T690   | 211. 9453026 | 689. 75  | 2622831. 308 |
| M212T738   | 211. 9499859 | 737. 955 | 331845. 1893 |
| M212T713   | 211. 9453055 | 713. 292 | 2304229. 344 |
| M212T677   | 211. 9452869 | 676. 878 | 1803986. 797 |
| M212T91    | 211. 9950041 | 90. 9026 | 78319930. 27 |
| M212T114   | 212. 0035972 | 113. 762 | 850432. 1885 |
| M212T335   | 212. 0554158 | 335. 153 | 2096710. 582 |
| M212T106   | 212. 0553405 | 105. 537 | 4793954. 907 |
| M212T314   | 212. 0553354 | 313. 612 | 5323842. 187 |
| M212T263   | 212. 0552915 | 263. 129 | 8397694. 072 |
| M212T83    | 212. 0548769 | 82. 8986 | 9768474. 173 |
| M212T294   | 212. 0553248 | 294. 152 | 3621613. 85  |
| M212T185   | 212. 0552763 | 185. 252 | 7508726. 456 |
| M212T146   | 212. 0552464 | 146. 08  | 3330910. 917 |
| M212T170   | 212. 0553218 | 170. 049 | 9115370. 732 |
| M212T398   | 212. 0634051 | 397. 585 | 1229523. 899 |
| M212T179   | 212. 0744732 | 179. 046 | 1316882. 614 |
| M212T369   | 212. 080509  | 368. 559 | 1119832. 434 |
| M212T373   | 212. 0912208 | 373. 196 | 840594. 223  |
| M212T329   | 212. 0918463 | 328. 999 | 1489136. 245 |
| M212T291   | 212. 0917275 | 291. 076 | 3932563. 016 |
| M212T413   | 212. 0913726 | 413. 006 | 3640753. 004 |
| M212T232   | 212. 0917882 | 231. 973 | 1088905. 003 |
| M212T202   | 212. 0916307 | 201. 897 | 1022141. 374 |
| M212T427   | 212. 0912849 | 426. 913 | 1158125. 924 |
| M212T302   | 212. 0916915 | 301. 725 | 1534553. 921 |
| M212T393   | 212. 0919012 | 392. 905 | 1225329. 242 |
| M212T246   | 212. 0917679 | 246. 013 | 1112117. 161 |
| M212T341   | 212. 0921434 | 341. 266 | 6627380. 334 |



|            |              |           |              |
|------------|--------------|-----------|--------------|
| M212T358   | 212. 0919065 | 357. 746  | 1379385. 293 |
| M212T312   | 212. 0919426 | 312. 058  | 771241. 0309 |
| M212T279   | 212. 1027178 | 278. 8475 | 547332. 4709 |
| M212T214   | 212. 102926  | 213. 897  | 618053. 9829 |
| M212T318   | 212. 1029008 | 318. 232  | 3015360. 037 |
| M213T87    | 212. 919315  | 87. 426   | 37768778. 77 |
| M213T480_1 | 212. 9782157 | 479. 541  | 631584. 427  |
| M213T106   | 213. 0159614 | 105. 537  | 31213271. 23 |
| M213T575   | 213. 029037  | 575. 222  | 303929. 1858 |
| M213T835   | 213. 0244768 | 835. 329  | 1125680. 327 |
| M213T303   | 213. 03687   | 303. 259  | 1467687. 561 |
| M213T375   | 213. 0394883 | 374. 746  | 593144. 2732 |
| M213T335   | 213. 0391597 | 335. 153  | 2032349. 938 |
| M213T172   | 213. 0393047 | 171. 546  | 3306212. 607 |
| M213T190   | 213. 0391232 | 189. 717  | 4228106. 003 |
| M213T146_1 | 213. 0391814 | 146. 08   | 2543507. 859 |
| M213T600   | 213. 0543378 | 599. 904  | 1432040. 072 |
| M213T33    | 213. 0550528 | 32. 8715  | 86245. 5743  |
| M213T263   | 213. 0586595 | 263. 129  | 603288. 0341 |
| M213T733   | 213. 0548459 | 733. 352  | 1097566. 726 |
| M213T234   | 213. 0752895 | 233. 519  | 3037091. 24  |
| M213T326   | 213. 0755025 | 325. 901  | 2102442. 619 |
| M213T291   | 213. 0759341 | 291. 076  | 3977050. 057 |
| M213T480_2 | 213. 0756832 | 479. 541  | 1098336. 217 |
| M213T346   | 213. 0758244 | 345. 761  | 2517673. 701 |
| M213T436_1 | 213. 0756391 | 436. 18   | 518570. 2396 |
| M213T373   | 213. 0755646 | 373. 196  | 2605038. 825 |
| M213T464   | 213. 0756902 | 464. 011  | 929884. 2245 |
| M213T317   | 213. 0756809 | 316. 709  | 2091795. 799 |
| M213T206   | 213. 0756562 | 206. 399  | 1015456. 587 |
| M213T364   | 213. 0756836 | 363. 928  | 1897879. 546 |
| M213T387   | 213. 0756035 | 386. 78   | 1985287. 967 |
| M213T297   | 213. 0863486 | 297. 149  | 4613160. 886 |
| M213T184   | 213. 087008  | 183. 708  | 6449714. 327 |
| M213T175   | 213. 0869832 | 174. 576  | 5355143. 966 |
| M213T146_2 | 213. 0869744 | 146. 08   | 1925979. 607 |
| M213T271   | 213. 0865172 | 270. 88   | 2013183. 012 |
| M213T318   | 213. 0871851 | 318. 232  | 1259829. 714 |
| M213T559   | 213. 1120877 | 558. 574  | 1586283. 271 |
| M213T436_2 | 213. 1120707 | 436. 18   | 2537747. 337 |
| M213T469   | 213. 1121445 | 468. 69   | 6615616. 535 |
| M213T634   | 213. 1120784 | 633. 832  | 2429378. 982 |
| M213T418   | 213. 112103  | 417. 689  | 1950154. 444 |
| M213T450   | 213. 112102  | 450. 052  | 9609296. 863 |
| M213T327   | 213. 1233109 | 327. 449  | 4600706. 561 |
| M213T154   | 213. 1230683 | 153. 601  | 791700. 4868 |
| M213T117   | 213. 1343291 | 116. 52   | 9480733. 636 |
| M213T139   | 213. 1346165 | 138. 719  | 2292800. 176 |
| M213T681   | 213. 1484244 | 681. 406  | 2510701. 324 |
| M213T746   | 213. 1483834 | 745. 747  | 1222104. 994 |
| M213T631   | 213. 1483112 | 630. 737  | 1408496. 611 |
| M213T618   | 213. 1483842 | 618. 45   | 3141547. 256 |
| M213T691   | 213. 1482833 | 691. 303  | 2334455. 046 |
| M214T738   | 213. 8817977 | 737. 955  | 477838. 3107 |

|            |              |          |              |
|------------|--------------|----------|--------------|
| M214T87    | 214. 0473032 | 87. 426  | 2444973. 856 |
| M214T106   | 214. 0706755 | 105. 537 | 9269970. 182 |
| M214T399   | 214. 0705571 | 399. 086 | 999084. 1585 |
| M214T179   | 214. 0705782 | 179. 046 | 7086148. 124 |
| M214T197   | 214. 0704853 | 197. 335 | 7255167. 648 |
| M214T241   | 214. 0705553 | 240. 733 | 3665512. 83  |
| M214T146   | 214. 0711132 | 146. 08  | 4388200. 34  |
| M214T293   | 214. 0737356 | 292. 621 | 4120625. 454 |
| M214T369   | 214. 1074552 | 368. 559 | 3925019. 13  |
| M214T346   | 214. 1073852 | 345. 761 | 3004433. 602 |
| M214T473   | 214. 1074905 | 473. 329 | 1112174. 57  |
| M214T430   | 214. 107133  | 429. 94  | 1489540. 035 |
| M214T492   | 214. 1438563 | 491. 99  | 2610992. 435 |
| M215T575   | 214. 8788874 | 575. 222 | 266162. 8811 |
| M215T542   | 214. 9661545 | 541. 673 | 288404. 1812 |
| M215T249   | 215. 0009564 | 248. 622 | 483695. 6717 |
| M215T87    | 215. 0071034 | 87. 426  | 73456867. 07 |
| M215T197   | 215. 0314974 | 197. 335 | 1917212. 841 |
| M215T172_1 | 215. 0309403 | 171. 546 | 3312978. 223 |
| M215T93    | 215. 0323054 | 92. 9618 | 284801196. 1 |
| M215T149   | 215. 0309642 | 148. 981 | 4671403. 084 |
| M215T778   | 215. 0319392 | 777. 92  | 3941027. 239 |
| M215T294   | 215. 0315491 | 294. 152 | 1887242. 092 |
| M215T835   | 215. 0319069 | 835. 329 | 4084012. 445 |
| M215T315_1 | 215. 0551663 | 315. 162 | 1849625. 389 |
| M215T106   | 215. 0551174 | 105. 537 | 10169557. 33 |
| M215T127   | 215. 055056  | 126. 755 | 5751034. 12  |
| M215T205   | 215. 0544638 | 204. 895 | 6274673. 468 |
| M215T746   | 215. 0498164 | 745. 747 | 1726775. 435 |
| M215T151   | 215. 0550949 | 150. 528 | 12235931. 43 |
| M215T428   | 215. 0816622 | 428. 448 | 38999860. 29 |
| M215T291   | 215. 0909693 | 291. 076 | 7008526. 936 |
| M215T327   | 215. 0910584 | 327. 449 | 3370661. 982 |
| M215T315_2 | 215. 0911271 | 315. 162 | 2066885. 202 |
| M215T353   | 215. 0917243 | 353. 163 | 4398598. 843 |
| M215T373   | 215. 0909986 | 373. 196 | 4598512. 65  |
| M215T302   | 215. 0910123 | 301. 725 | 1972938. 272 |
| M215T234   | 215. 0911054 | 233. 519 | 1824496. 629 |
| M215T246   | 215. 0910164 | 246. 474 | 1998152. 444 |
| M215T263   | 215. 0913913 | 263. 129 | 352031. 6542 |
| M215T341   | 215. 0917608 | 341. 266 | 5002176. 961 |
| M215T404   | 215. 0917043 | 403. 698 | 1343276. 852 |
| M215T475   | 215. 0912972 | 474. 888 | 1089164. 852 |
| M215T276   | 215. 091019  | 276. 104 | 2031979. 645 |
| M215T158   | 215. 1025175 | 158. 1   | 950633. 5752 |
| M215T172_2 | 215. 1022384 | 171. 546 | 3223402. 194 |
| M215T455   | 215. 1276606 | 454. 645 | 2257934. 527 |
| M215T520   | 215. 1295937 | 519. 998 | 2133123. 094 |
| M215T470   | 215. 127658  | 470. 253 | 3211064. 172 |
| M215T422   | 215. 1276754 | 422. 362 | 2112840. 102 |
| M215T484   | 215. 1276866 | 484. 221 | 26153954. 31 |
| M215T408   | 215. 1280951 | 408. 368 | 1430044. 232 |
| M215T394   | 215. 1276918 | 394. 467 | 1218879. 936 |
| M215T209   | 215. 1389235 | 209. 472 | 3656966. 827 |

|          |              |          |              |
|----------|--------------|----------|--------------|
| M215T730 | 215. 1641244 | 730. 264 | 5934723. 735 |
| M215T658 | 215. 1636552 | 658. 372 | 3223301. 515 |
| M216T48  | 216. 0124034 | 48. 1607 | 1650094. 73  |
| M216T41  | 216. 0123517 | 41. 3907 | 1711738. 835 |
| M216T55  | 216. 0124368 | 54. 7362 | 790183. 1001 |
| M216T136 | 216. 0135752 | 135. 795 | 10409351. 28 |
| M216T66  | 216. 0124171 | 66. 2043 | 2364569. 738 |
| M216T622 | 216. 0291013 | 621. 547 | 409690. 0813 |
| M216T92  | 216. 0349425 | 91. 9113 | 10431345. 25 |
| M216T104 | 216. 0503918 | 104. 493 | 6393562. 227 |
| M216T422 | 216. 0655576 | 422. 362 | 353352. 7944 |
| M216T712 | 216. 0656289 | 711. 794 | 3481882. 608 |
| M216T106 | 216. 0865229 | 105. 537 | 6466370. 441 |
| M216T326 | 216. 0866894 | 325. 901 | 912321. 7563 |
| M216T149 | 216. 0864469 | 148. 981 | 39262806. 68 |
| M216T130 | 216. 0864639 | 129. 827 | 8264728. 562 |
| M216T296 | 216. 0865108 | 295. 704 | 916434. 8384 |
| M216T428 | 216. 0846833 | 428. 448 | 4845126. 716 |
| M216T484 | 216. 1310534 | 484. 221 | 2737566. 711 |
| M217T77  | 216. 9073676 | 77. 2263 | 30609764. 11 |
| M217T274 | 216. 9597881 | 273. 82  | 1106773. 211 |
| M217T117 | 216. 9654657 | 116. 52  | 1020173. 658 |
| M217T82  | 217. 0341893 | 81. 8855 | 10840747. 42 |
| M217T109 | 217. 0290244 | 109. 475 | 22520846. 61 |
| M217T778 | 217. 0288574 | 777. 92  | 1157425. 648 |
| M217T92  | 217. 028529  | 91. 9113 | 65517007. 22 |
| M217T169 | 217. 0330916 | 168. 507 | 3320527. 583 |
| M217T240 | 217. 0342425 | 239. 574 | 1162032. 782 |
| M217T506 | 217. 0493937 | 505. 99  | 728295. 4722 |
| M217T424 | 217. 0620773 | 423. 877 | 1083928. 417 |
| M217T147 | 217. 0705805 | 147. 455 | 3856688. 431 |
| M217T302 | 217. 0709826 | 301. 725 | 1190789. 442 |
| M217T229 | 217. 0706106 | 228. 961 | 1575691. 631 |
| M217T149 | 217. 0895073 | 148. 981 | 3414527. 895 |
| M217T411 | 217. 107737  | 411. 444 | 2708204. 427 |
| M217T398 | 217. 1077562 | 397. 585 | 1058988. 067 |
| M217T356 | 217. 1059974 | 356. 274 | 1253507. 064 |
| M217T464 | 217. 1076916 | 464. 011 | 1100351. 694 |
| M217T379 | 217. 1060317 | 379. 066 | 1708061. 517 |
| M217T341 | 217. 1060921 | 341. 266 | 2946749. 506 |
| M217T484 | 217. 1059161 | 484. 221 | 1030203. 407 |
| M217T277 | 217. 1067313 | 277. 42  | 697578. 638  |
| M217T294 | 217. 1070138 | 294. 152 | 1920105. 75  |
| M217T323 | 217. 1085624 | 322. 862 | 24245640. 43 |
| M217T303 | 217. 1068851 | 303. 259 | 3368737. 347 |
| M217T439 | 217. 1085718 | 439. 27  | 1381512. 952 |
| M217T107 | 217. 1176606 | 106. 648 | 6867194. 232 |
| M217T166 | 217. 1180505 | 165. 522 | 2285099. 655 |
| M217T203 | 217. 1180573 | 203. 346 | 4669730. 762 |
| M217T157 | 217. 1180884 | 156. 582 | 2314174. 718 |
| M217T441 | 217. 1432256 | 440. 833 | 1494241. 724 |
| M217T569 | 217. 1427263 | 569. 091 | 6763275. 754 |
| M217T75  | 217. 4742131 | 74. 6705 | 27330688. 2  |
| M218T178 | 218. 0284068 | 177. 649 | 345146. 2281 |

|            |              |          |              |
|------------|--------------|----------|--------------|
| M218T338   | 218. 0449337 | 338. 222 | 8095741. 55  |
| M218T82    | 218. 0656508 | 81. 8855 | 15018941. 99 |
| M218T197   | 218. 0659294 | 197. 335 | 1972599. 056 |
| M218T172   | 218. 0655491 | 171. 546 | 1025935. 88  |
| M218T675   | 218. 0658696 | 675. 322 | 387028. 9836 |
| M218T146   | 218. 0654948 | 146. 08  | 2889870. 077 |
| M218T483   | 218. 0805733 | 482. 656 | 1299091. 848 |
| M218T441   | 218. 0815409 | 440. 833 | 4934731. 269 |
| M218T569_1 | 218. 0811256 | 569. 091 | 297845. 6105 |
| M218T399   | 218. 0923714 | 399. 086 | 898038. 8565 |
| M218T106   | 218. 101961  | 105. 537 | 2803045. 252 |
| M218T212   | 218. 1029891 | 212. 366 | 52421759. 15 |
| M218T188   | 218. 1016055 | 188. 174 | 9712665. 361 |
| M218T324   | 218. 1099682 | 324. 413 | 2504939. 82  |
| M218T569_2 | 218. 1464431 | 569. 091 | 676806. 2926 |
| M219T127_1 | 218. 9446376 | 126. 755 | 1010796. 658 |
| M219T139_1 | 218. 9444693 | 138. 719 | 879544. 3541 |
| M219T115   | 218. 9445335 | 115. 123 | 705480. 3753 |
| M219T114   | 218. 9811133 | 113. 762 | 3099780. 163 |
| M219T33    | 218. 984795  | 32. 8715 | 634921. 3323 |
| M219T139_2 | 218. 9812956 | 138. 719 | 3210740. 069 |
| M219T87    | 218. 9812224 | 87. 426  | 7384871. 031 |
| M219T125   | 218. 98127   | 125. 274 | 1938927. 53  |
| M219T258_1 | 218. 9958707 | 258. 208 | 461809. 5119 |
| M219T246   | 219. 0135623 | 246. 013 | 244044. 4084 |
| M219T494   | 219. 0288382 | 493. 56  | 704845. 3689 |
| M219T332   | 219. 0262004 | 332. 105 | 580659. 394  |
| M219T320   | 219. 0257245 | 319. 785 | 1597351. 269 |
| M219T235   | 219. 0250676 | 234. 972 | 399751. 5576 |
| M219T459   | 219. 0290431 | 459. 324 | 880996. 1253 |
| M219T145   | 219. 0500507 | 144. 706 | 82648036. 94 |
| M219T84    | 219. 0500421 | 83. 9405 | 63040062. 51 |
| M219T127_2 | 219. 0500368 | 126. 755 | 73007085. 55 |
| M219T95    | 219. 0477661 | 95. 2383 | 37739341. 63 |
| M219T495   | 219. 0650248 | 495. 125 | 1443661. 857 |
| M219T335   | 219. 0764652 | 335. 153 | 997310. 7501 |
| M219T346   | 219. 0764311 | 345. 761 | 2106464. 959 |
| M219T158   | 219. 0796909 | 158. 1   | 432077. 8662 |
| M219T258_2 | 219. 0761266 | 258. 208 | 1454707. 168 |
| M219T441   | 219. 0847268 | 440. 833 | 638519. 8315 |
| M219T212   | 219. 1054632 | 212. 366 | 4420819. 566 |
| M219T293   | 219. 1226581 | 292. 621 | 5165290. 911 |
| M219T504   | 219. 1247609 | 504. 432 | 354767. 3973 |
| M219T283   | 219. 1227054 | 282. 659 | 1964470. 218 |
| M219T492   | 219. 1225264 | 491. 99  | 750062. 9443 |
| M219T835   | 219. 1376892 | 835. 329 | 1741725. 895 |
| M220T127   | 220. 0529697 | 126. 755 | 5946047. 836 |
| M220T143   | 220. 0529826 | 143. 174 | 8322548. 185 |
| M220T85    | 220. 0531847 | 85. 0169 | 3429968. 149 |
| M220T329   | 220. 0628538 | 328. 999 | 5446205. 866 |
| M220T172   | 220. 0635805 | 171. 546 | 1590064. 008 |
| M220T362   | 220. 0605149 | 362. 384 | 2146612. 911 |
| M220T379   | 220. 0966824 | 379. 066 | 1257804. 715 |
| M220T483   | 220. 1073931 | 482. 656 | 1182819. 72  |

|          |              |          |              |
|----------|--------------|----------|--------------|
| M220T811 | 220. 1329204 | 811. 292 | 1961477. 413 |
| M221T86  | 220. 9483175 | 86. 3396 | 9545329. 114 |
| M221T158 | 221. 0114536 | 158. 1   | 503532. 3148 |
| M221T81  | 221. 0289818 | 80. 6174 | 4024017. 563 |
| M221T194 | 221. 0291664 | 194. 243 | 2255153. 338 |
| M221T455 | 221. 0445858 | 454. 645 | 11546271. 78 |
| M221T539 | 221. 044972  | 538. 619 | 1657907. 853 |
| M221T522 | 221. 0449932 | 521. 5   | 1058797. 425 |
| M221T327 | 221. 0443549 | 327. 449 | 1977478. 398 |
| M221T472 | 221. 0448714 | 471. 768 | 2357100. 768 |
| M221T481 | 221. 0445692 | 481. 089 | 2353958. 638 |
| M221T421 | 221. 0445862 | 420. 799 | 3105933. 259 |
| M221T202 | 221. 0444049 | 201. 897 | 1213966. 161 |
| M221T500 | 221. 0448861 | 499. 759 | 1281980. 182 |
| M221T551 | 221. 0441828 | 550. 932 | 4951522. 995 |
| M221T511 | 221. 0448362 | 510. 673 | 1063861. 93  |
| M221T441 | 221. 0445365 | 440. 833 | 2648662. 514 |
| M221T211 | 221. 0442688 | 210. 883 | 1153635. 024 |
| M221T170 | 221. 0444525 | 170. 049 | 972468. 9098 |
| M221T387 | 221. 0550923 | 386. 78  | 11386848. 46 |
| M221T85  | 221. 0593327 | 85. 0169 | 3622811. 878 |
| M221T147 | 221. 06525   | 147. 455 | 12732391. 01 |
| M221T172 | 221. 0648948 | 171. 546 | 8986001. 808 |
| M221T95  | 221. 0648175 | 95. 2383 | 813744956. 9 |
| M221T514 | 221. 080418  | 513. 768 | 1773475. 816 |
| M221T586 | 221. 0807846 | 586. 044 | 660972. 2987 |
| M221T350 | 221. 0925837 | 350. 108 | 1974629. 356 |
| M221T407 | 221. 0924982 | 406. 813 | 4641965. 171 |
| M221T418 | 221. 0917984 | 417. 689 | 1443926. 933 |
| M221T334 | 221. 0920265 | 333. 655 | 2860477. 324 |
| M221T631 | 221. 1168319 | 630. 737 | 357582. 7935 |
| M221T784 | 221. 1283344 | 784. 051 | 961090. 5746 |
| M222T84  | 222. 0426758 | 83. 9405 | 3767453. 197 |
| M222T229 | 222. 0395468 | 228. 961 | 349078. 6166 |
| M222T173 | 222. 0395534 | 173. 092 | 269843. 407  |
| M222T455 | 222. 0494156 | 454. 645 | 810262. 7173 |
| M222T221 | 222. 0623603 | 221. 453 | 3754773. 475 |
| M222T109 | 222. 0685125 | 109. 475 | 5068919. 32  |
| M222T95  | 222. 0683493 | 95. 2383 | 63577417. 79 |
| M222T413 | 222. 0760123 | 413. 006 | 4740594. 342 |
| M222T369 | 222. 075984  | 368. 559 | 3805021. 395 |
| M222T353 | 222. 0759821 | 353. 163 | 2306550. 103 |
| M222T470 | 222. 076013  | 470. 253 | 3029244. 379 |
| M222T193 | 222. 0759176 | 192. 769 | 1969768. 264 |
| M222T344 | 222. 0761344 | 344. 233 | 1675102. 591 |
| M222T396 | 222. 0760015 | 396. 023 | 6332610. 714 |
| M222T314 | 222. 0764391 | 313. 612 | 942312. 7919 |
| M222T300 | 222. 0764108 | 300. 176 | 5736895. 241 |
| M222T537 | 222. 1121548 | 537. 051 | 1570322. 253 |
| M222T529 | 222. 1126088 | 529. 248 | 672700. 4288 |
| M223T249 | 222. 8729354 | 249. 466 | 396972. 6217 |
| M223T264 | 222. 8732003 | 263. 845 | 371966. 391  |
| M223T231 | 222. 8730266 | 230. 507 | 1307817. 318 |
| M223T373 | 223. 023401  | 373. 196 | 1629812. 683 |

|            |              |          |              |
|------------|--------------|----------|--------------|
| M223T175   | 223. 0236466 | 174. 576 | 747561. 7123 |
| M223T358_1 | 223. 0229645 | 357. 746 | 2679756. 661 |
| M223T324   | 223. 0231115 | 324. 413 | 4189435. 445 |
| M223T334   | 223. 0230478 | 333. 655 | 4760779. 022 |
| M223T78    | 223. 0447959 | 78. 2661 | 44056827. 3  |
| M223T106   | 223. 0439234 | 105. 537 | 212067280. 4 |
| M223T93    | 223. 0444955 | 92. 9618 | 50063379. 31 |
| M223T421   | 223. 0601029 | 420. 799 | 2809580. 555 |
| M223T635   | 223. 059724  | 635. 37  | 1202857. 753 |
| M223T332   | 223. 0600507 | 332. 105 | 2466626. 504 |
| M223T467   | 223. 0601098 | 467. 127 | 2127743. 761 |
| M223T358_2 | 223. 060159  | 357. 746 | 2141515. 916 |
| M223T385   | 223. 0601581 | 385. 225 | 4528922. 018 |
| M223T205   | 223. 071605  | 204. 895 | 825441. 4738 |
| M223T268   | 223. 071236  | 268. 419 | 2270478. 563 |
| M223T95    | 223. 0699525 | 95. 2383 | 7766773. 53  |
| M223T335   | 223. 0716231 | 335. 153 | 1057530. 714 |
| M223T155   | 223. 081058  | 155. 033 | 3464481. 788 |
| M223T469   | 223. 0807093 | 468. 69  | 317423. 3053 |
| M223T494   | 223. 0955657 | 493. 56  | 806668. 8693 |
| M223T424   | 223. 0964347 | 423. 877 | 749141. 4869 |
| M223T575   | 223. 0967871 | 575. 222 | 867685. 0239 |
| M223T693   | 223. 1324044 | 692. 781 | 1842447. 26  |
| M223T776   | 223. 1332598 | 776. 391 | 3001301. 302 |
| M224T837   | 224. 0398341 | 836. 769 | 976154. 4426 |
| M224T167   | 224. 0404473 | 167. 01  | 3179407. 704 |
| M224T755   | 224. 0398046 | 754. 814 | 2282429. 793 |
| M224T766   | 224. 0398724 | 765. 588 | 1468686. 537 |
| M224T128   | 224. 0404133 | 128. 279 | 7427119. 607 |
| M224T822   | 224. 0398243 | 821. 831 | 2450660. 494 |
| M224T829   | 224. 0398218 | 829. 321 | 1114126. 95  |
| M224T720   | 224. 0403808 | 719. 505 | 5636422. 002 |
| M224T185   | 224. 0401324 | 185. 252 | 5919592. 911 |
| M224T146_1 | 224. 040124  | 146. 08  | 4502929. 36  |
| M224T798   | 224. 0398923 | 797. 757 | 4265019. 259 |
| M224T773_1 | 224. 0403072 | 773. 333 | 1985848. 24  |
| M224T327   | 224. 0554942 | 327. 449 | 2440700. 293 |
| M224T106   | 224. 0480428 | 105. 537 | 13101775. 14 |
| M224T147   | 224. 0553492 | 147. 455 | 3307645. 685 |
| M224T399   | 224. 0554627 | 399. 086 | 962364. 3632 |
| M224T214   | 224. 0531658 | 213. 897 | 2601097. 561 |
| M224T264_1 | 224. 0552433 | 264. 434 | 8400027. 286 |
| M224T335   | 224. 0556227 | 335. 153 | 1760238. 108 |
| M224T603   | 224. 0755376 | 603. 04  | 5243954. 393 |
| M224T663   | 224. 0756208 | 663. 008 | 4965686. 698 |
| M224T625   | 224. 07555   | 624. 642 | 5110524. 493 |
| M224T687   | 224. 0755109 | 687. 214 | 5408891. 464 |
| M224T730   | 224. 0756778 | 730. 264 | 14062317. 04 |
| M224T642   | 224. 0755644 | 641. 603 | 3912228. 258 |
| M224T761   | 224. 0771313 | 760. 976 | 5482009. 633 |
| M224T781   | 224. 0770951 | 780. 958 | 3459135. 697 |
| M224T651   | 224. 0756796 | 650. 74  | 4049725. 275 |
| M224T715   | 224. 0755606 | 714. 841 | 4475342. 132 |
| M224T634   | 224. 0756328 | 633. 832 | 4612316. 254 |

|            |              |          |              |
|------------|--------------|----------|--------------|
| M224T811   | 224. 0770928 | 811. 292 | 24259994. 08 |
| M224T614   | 224. 0756268 | 613. 824 | 5387827. 545 |
| M224T90    | 224. 0766794 | 89. 8937 | 38562545. 78 |
| M224T696   | 224. 0755567 | 695. 893 | 5056935. 539 |
| M224T674   | 224. 0756045 | 673. 771 | 7056652. 879 |
| M224T773_2 | 224. 0770556 | 773. 333 | 5747697. 675 |
| M224T227   | 224. 0918079 | 227. 421 | 3215068. 18  |
| M224T127   | 224. 0917894 | 126. 755 | 1187611. 372 |
| M224T449   | 224. 0921142 | 448. 527 | 2483671. 669 |
| M224T427   | 224. 0914419 | 426. 913 | 15891086. 83 |
| M224T341   | 224. 0921156 | 341. 266 | 1467249. 229 |
| M224T469   | 224. 0914705 | 468. 69  | 1996435. 691 |
| M224T237   | 224. 0918811 | 236. 518 | 2076197. 19  |
| M224T146_2 | 224. 0916675 | 146. 08  | 2185418. 947 |
| M224T264_2 | 224. 1028906 | 264. 434 | 677612. 1878 |
| M224T532   | 224. 1274276 | 532. 372 | 2071364. 425 |
| M225T95    | 224. 9493909 | 95. 2383 | 13060702. 06 |
| M225T226   | 225. 0158678 | 225. 965 | 422782. 7377 |
| M225T212   | 225. 0390072 | 212. 366 | 5071923. 856 |
| M225T337   | 225. 0393357 | 336. 681 | 3746232. 504 |
| M225T155   | 225. 0397786 | 155. 033 | 2714580. 858 |
| M225T294   | 225. 0389405 | 294. 152 | 4903347. 132 |
| M225T277   | 225. 0579009 | 277. 135 | 12820593. 38 |
| M225T271   | 225. 0579188 | 270. 88  | 18129627. 93 |
| M225T260_1 | 225. 0579168 | 259. 983 | 24108411. 97 |
| M225T266   | 225. 058074  | 265. 541 | 19612977. 64 |
| M225T255   | 225. 057992  | 254. 651 | 26856941. 62 |
| M225T528   | 225. 0579873 | 527. 688 | 36305645. 61 |
| M225T534   | 225. 0580708 | 533. 931 | 48357695. 36 |
| M225T623   | 225. 0579112 | 623. 098 | 35738694. 72 |
| M225T600   | 225. 0580467 | 599. 904 | 25417241. 16 |
| M225T767   | 225. 0580529 | 767. 145 | 133396752. 6 |
| M225T557   | 225. 058064  | 557. 078 | 23666329. 83 |
| M225T609   | 225. 0579137 | 609. 19  | 43509783. 58 |
| M225T826   | 225. 0579049 | 826. 333 | 38276295. 33 |
| M225T379   | 225. 0581961 | 379. 066 | 44966091. 16 |
| M225T361   | 225. 0581119 | 360. 831 | 46608612. 54 |
| M225T511   | 225. 0580094 | 510. 673 | 35828760. 43 |
| M225T341   | 225. 0581197 | 341. 266 | 28397652. 46 |
| M225T577   | 225. 0580487 | 576. 787 | 91350605. 6  |
| M225T425   | 225. 0581243 | 425. 439 | 29950892. 14 |
| M225T452_1 | 225. 0581769 | 451. 616 | 31493908. 5  |
| M225T501   | 225. 058048  | 501. 318 | 33156400. 72 |
| M225T303   | 225. 0578605 | 303. 259 | 31225643. 22 |
| M225T480   | 225. 0633219 | 479. 541 | 23959295. 44 |
| M225T285   | 225. 0633904 | 285. 167 | 31065024. 47 |
| M225T245   | 225. 0633428 | 245. 353 | 37460774. 54 |
| M225T124   | 225. 0633983 | 123. 792 | 71865623. 3  |
| M225T232   | 225. 0632586 | 231. 973 | 43362422. 87 |
| M225T410   | 225. 0633329 | 409. 881 | 45990565. 25 |
| M225T157   | 225. 0632426 | 156. 582 | 53432087. 67 |
| M225T221   | 225. 0634229 | 221. 453 | 32748511. 17 |
| M225T442   | 225. 0633471 | 442. 399 | 33087919. 63 |
| M225T205   | 225. 063341  | 204. 895 | 35018395. 53 |

|            |              |          |              |
|------------|--------------|----------|--------------|
| M225T470_1 | 225. 0633413 | 470. 253 | 33770435. 7  |
| M225T188   | 225. 0631727 | 188. 174 | 35534703. 14 |
| M225T93_1  | 225. 0606235 | 92. 9618 | 3851303888   |
| M225T688   | 225. 0606191 | 688. 189 | 48832359. 5  |
| M225T655   | 225. 0633546 | 655. 321 | 77674776. 41 |
| M225T149   | 225. 0633971 | 148. 981 | 39323988. 63 |
| M225T321   | 225. 0634174 | 321. 312 | 30877901. 57 |
| M225T792   | 225. 0631342 | 791. 678 | 13738389. 4  |
| M225T799   | 225. 0633313 | 799. 306 | 37351351. 22 |
| M225T332   | 225. 0633748 | 332. 105 | 31878856. 72 |
| M225T175   | 225. 0606069 | 174. 576 | 72853052. 71 |
| M225T634   | 225. 0634068 | 633. 832 | 42610784. 16 |
| M225T134   | 225. 0605963 | 134. 253 | 128345703. 2 |
| M225T716   | 225. 0632157 | 716. 391 | 62998343. 2  |
| M225T490   | 225. 0633844 | 490. 434 | 33526820. 25 |
| M225T835   | 225. 0606608 | 835. 329 | 37997584. 13 |
| M225T814   | 225. 0636954 | 814. 118 | 53939782. 89 |
| M225T472   | 225. 0790459 | 471. 768 | 456037. 4726 |
| M225T408   | 225. 0754551 | 408. 368 | 1192073. 549 |
| M225T249   | 225. 0870364 | 248. 622 | 9002680. 615 |
| M225T244   | 225. 086997  | 243. 976 | 4688082. 77  |
| M225T185   | 225. 0871022 | 185. 252 | 10972254. 38 |
| M225T260_2 | 225. 0869857 | 259. 983 | 822301. 8923 |
| M225T324   | 225. 0865642 | 324. 413 | 1786916. 09  |
| M225T433   | 225. 112276  | 433. 06  | 2301266. 169 |
| M225T539   | 225. 1122328 | 538. 619 | 14229538. 29 |
| M225T375   | 225. 1122284 | 374. 746 | 3570059. 771 |
| M225T598   | 225. 112255  | 598. 341 | 5818753. 743 |
| M225T470_2 | 225. 1121962 | 470. 253 | 3514695. 708 |
| M225T614   | 225. 1121821 | 613. 824 | 1970540. 369 |
| M225T452_2 | 225. 1122134 | 451. 616 | 1828498. 744 |
| M225T305   | 225. 134349  | 304. 743 | 1225557. 763 |
| M225T93_2  | 225. 1691102 | 92. 9618 | 16883359. 04 |
| M226T707   | 225. 9253096 | 707. 143 | 3205138. 631 |
| M226T665   | 225. 9252865 | 664. 565 | 5156775. 414 |
| M226T694   | 225. 9252438 | 694. 341 | 7132862. 877 |
| M226T716   | 225. 925226  | 716. 391 | 4985099. 608 |
| M226T654   | 225. 9253306 | 653. 835 | 3190740. 191 |
| M226T154   | 226. 0194292 | 153. 601 | 2093488. 284 |
| M226T169   | 226. 0344443 | 168. 507 | 20289749. 93 |
| M226T326   | 226. 0468752 | 325. 901 | 231596. 0604 |
| M226T93    | 226. 0629688 | 92. 9618 | 278942455. 1 |
| M226T355   | 226. 0712282 | 354. 719 | 1822603. 884 |
| M226T182   | 226. 071019  | 182. 156 | 6063478. 728 |
| M226T337   | 226. 0710498 | 336. 681 | 3295600. 166 |
| M226T314   | 226. 0710913 | 313. 612 | 5045544. 105 |
| M226T372   | 226. 0729961 | 371. 633 | 2897142. 303 |
| M226T404   | 226. 0713773 | 403. 698 | 1582565. 814 |
| M226T385   | 226. 0709376 | 385. 225 | 1612056. 884 |
| M226T106   | 226. 07335   | 105. 537 | 5081628. 28  |
| M226T142   | 226. 0731401 | 141. 655 | 9620035. 043 |
| M226T299   | 226. 0731226 | 298. 619 | 7771422. 253 |
| M226T190   | 226. 0820102 | 189. 717 | 1290638. 687 |
| M226T243   | 226. 0904512 | 243. 386 | 396147. 9391 |



|            |              |          |              |
|------------|--------------|----------|--------------|
| M226T249   | 226. 0905477 | 248. 622 | 816863. 7472 |
| M226T329   | 226. 1070964 | 328. 999 | 1043802. 705 |
| M226T472   | 226. 1073652 | 471. 768 | 5393578. 845 |
| M226T288   | 226. 1074264 | 287. 981 | 1152796. 281 |
| M226T376   | 226. 1070526 | 376. 15  | 772354. 6667 |
| M226T459   | 226. 1073955 | 459. 324 | 1612237. 472 |
| M227T813   | 226. 7997979 | 812. 68  | 4858178. 752 |
| M227T724   | 226. 7995584 | 724. 158 | 3420934. 867 |
| M227T713   | 226. 7996022 | 713. 292 | 2866859. 095 |
| M227T134_1 | 226. 9169691 | 134. 253 | 3127882. 877 |
| M227T114   | 226. 9263652 | 113. 762 | 2018630. 236 |
| M227T49    | 226. 9643676 | 48. 5001 | 267230. 9938 |
| M227T62    | 226. 9655234 | 62. 1587 | 761985. 2919 |
| M227T139   | 226. 9647247 | 138. 719 | 3021505. 638 |
| M227T444   | 226. 9649401 | 443. 961 | 302619. 3213 |
| M227T87    | 226. 9644031 | 87. 426  | 8890022. 692 |
| M227T130   | 226. 9646806 | 129. 827 | 3960521. 338 |
| M227T112   | 226. 9646505 | 112. 287 | 4083221. 671 |
| M227T34    | 226. 9642692 | 34. 4117 | 697716. 9523 |
| M227T67    | 226. 9655328 | 67. 1831 | 553994. 5957 |
| M227T55    | 226. 9656128 | 54. 7362 | 739477. 9867 |
| M227T279   | 227. 0186706 | 278. 627 | 441265. 8048 |
| M227T258   | 227. 0301134 | 258. 208 | 1963193. 418 |
| M227T163   | 227. 054797  | 162. 615 | 2944456. 672 |
| M227T309   | 227. 0548536 | 309. 091 | 2637780. 844 |
| M227T327   | 227. 0551474 | 327. 449 | 1810340. 857 |
| M227T346   | 227. 0548838 | 345. 761 | 1764124. 39  |
| M227T221   | 227. 0548104 | 221. 453 | 2665530. 53  |
| M227T197   | 227. 0548468 | 197. 335 | 3486307. 306 |
| M227T172   | 227. 0550334 | 171. 546 | 2001699. 56  |
| M227T283   | 227. 0548199 | 282. 659 | 2370943. 508 |
| M227T402   | 227. 054674  | 402. 144 | 2217784. 18  |
| M227T146_1 | 227. 0548286 | 146. 08  | 2926331. 785 |
| M227T290   | 227. 0654413 | 289. 534 | 3946543. 001 |
| M227T106   | 227. 065236  | 105. 537 | 9295236. 99  |
| M227T117   | 227. 0651563 | 116. 52  | 2406360. 923 |
| M227T93    | 227. 0639944 | 92. 9618 | 54921449. 67 |
| M227T134_2 | 227. 0648337 | 134. 253 | 1479320. 804 |
| M227T146_2 | 227. 0658229 | 146. 08  | 1556887. 175 |
| M227T828   | 227. 0736653 | 827. 821 | 8144628. 355 |
| M227T786   | 227. 073533  | 785. 593 | 4487910. 986 |
| M227T799   | 227. 0737587 | 799. 306 | 5127065. 263 |
| M227T775_1 | 227. 0735745 | 774. 892 | 2837350. 626 |
| M227T92    | 227. 0763146 | 91. 9113 | 300633903. 9 |
| M227T108   | 227. 0761837 | 108. 082 | 14051310. 25 |
| M227T430   | 227. 0913237 | 429. 94  | 1071088. 777 |
| M227T387   | 227. 0912891 | 386. 78  | 1628787. 668 |
| M227T217   | 227. 102374  | 216. 95  | 722411. 504  |
| M227T323   | 227. 1022825 | 322. 862 | 9269159. 35  |
| M227T107   | 227. 1131651 | 106. 648 | 15309753. 12 |
| M227T134_3 | 227. 1128065 | 134. 253 | 28557090. 89 |
| M227T151   | 227. 1136434 | 150. 528 | 2074243. 552 |
| M227T560   | 227. 127859  | 560. 119 | 15832230. 96 |
| M227T506   | 227. 1277998 | 505. 99  | 8326527. 29  |

|            |              |          |              |
|------------|--------------|----------|--------------|
| M227T572   | 227. 1278238 | 572. 152 | 4814426. 561 |
| M227T487   | 227. 127841  | 487. 329 | 15500371. 5  |
| M227T753   | 227. 1281464 | 753. 315 | 2205814. 346 |
| M227T369   | 227. 1387565 | 368. 559 | 7320997. 809 |
| M227T300   | 227. 1387746 | 300. 176 | 2349526. 714 |
| M227T732   | 227. 1643242 | 731. 793 | 1836554. 913 |
| M227T775_2 | 227. 1642896 | 774. 892 | 1826282. 061 |
| M228T321   | 228. 024582  | 321. 312 | 624405. 2761 |
| M228T291   | 228. 0505717 | 291. 076 | 614635. 3413 |
| M228T145   | 228. 0497933 | 144. 706 | 2630666. 844 |
| M228T234   | 228. 0504957 | 233. 519 | 403968. 2137 |
| M228T109   | 228. 0505346 | 109. 475 | 1915039. 336 |
| M228T83_1  | 228. 0500729 | 82. 8986 | 3689131. 394 |
| M228T175_1 | 228. 0504381 | 174. 576 | 2107703. 206 |
| M228T83_2  | 228. 0629177 | 82. 8986 | 3377842. 577 |
| M228T632   | 228. 0647803 | 632. 288 | 1105981. 078 |
| M228T92    | 228. 0791516 | 91. 9113 | 20389981. 92 |
| M228T329   | 228. 0865289 | 328. 999 | 1568020. 592 |
| M228T106   | 228. 0866699 | 105. 537 | 1288910. 276 |
| M228T147   | 228. 0866909 | 147. 455 | 4865846. 522 |
| M228T393   | 228. 0864341 | 392. 905 | 1433793. 621 |
| M228T172   | 228. 0864981 | 171. 546 | 3020354. 513 |
| M228T185   | 228. 0979768 | 185. 252 | 12722575. 59 |
| M228T175_2 | 228. 0979427 | 174. 576 | 5190821. 43  |
| M228T131   | 228. 1171029 | 131. 207 | 1713652. 684 |
| M228T391   | 228. 1226457 | 391. 341 | 1468138. 126 |
| M228T401   | 228. 1228767 | 400. 641 | 1747606. 013 |
| M228T526   | 228. 1233071 | 526. 124 | 2529848. 369 |
| M228T418   | 228. 1234083 | 417. 689 | 1662075. 586 |
| M228T439   | 228. 1229961 | 439. 27  | 1748298. 039 |
| M228T486   | 228. 1314086 | 485. 784 | 1777867. 102 |
| M228T372   | 228. 1425547 | 371. 633 | 569897. 2223 |
| M228T548   | 228. 1593113 | 547. 805 | 2704686. 259 |
| M229T31    | 228. 9885919 | 31. 4228 | 1046159. 616 |
| M229T609   | 228. 9930321 | 609. 19  | 1893626. 019 |
| M229T642   | 228. 9930623 | 641. 603 | 624918. 3877 |
| M229T594   | 228. 993049  | 593. 841 | 2795617. 274 |
| M229T569   | 228. 9930447 | 569. 091 | 510357. 7983 |
| M229T119   | 229. 0291288 | 119. 413 | 342583. 802  |
| M229T84    | 229. 0290663 | 83. 9405 | 2365133. 92  |
| M229T221   | 229. 0344461 | 221. 453 | 429561. 6671 |
| M229T146_1 | 229. 0344589 | 146. 08  | 1304427. 057 |
| M229T637   | 229. 0492956 | 636. 925 | 1608167. 514 |
| M229T779   | 229. 0609395 | 779. 407 | 415962. 7806 |
| M229T166   | 229. 0702583 | 165. 522 | 4695791. 541 |
| M229T147   | 229. 0706112 | 147. 455 | 2542460. 725 |
| M229T106   | 229. 0821851 | 105. 537 | 5499720. 869 |
| M229T175   | 229. 0819998 | 174. 576 | 1475645. 086 |
| M229T256   | 229. 0810402 | 255. 831 | 2582030. 322 |
| M229T146_2 | 229. 0820897 | 146. 08  | 2500694. 02  |
| M229T534   | 229. 0970171 | 533. 931 | 1208692. 315 |
| M229T512   | 229. 1072891 | 512. 228 | 8925862. 852 |
| M229T326   | 229. 1068672 | 325. 901 | 1074781. 692 |
| M229T376   | 229. 1066124 | 376. 15  | 2230517. 227 |

|          |              |          |              |
|----------|--------------|----------|--------------|
| M229T404 | 229. 1068334 | 403. 698 | 4790361. 313 |
| M229T359 | 229. 1068698 | 359. 297 | 2508254. 498 |
| M229T293 | 229. 1182911 | 292. 621 | 1426984. 372 |
| M229T478 | 229. 143539  | 477. 982 | 2715568. 244 |
| M229T458 | 229. 143504  | 457. 763 | 3274353. 171 |
| M229T546 | 229. 143446  | 546. 308 | 27866582. 23 |
| M229T511 | 229. 143463  | 510. 673 | 2267650. 706 |
| M229T487 | 229. 1434906 | 487. 329 | 2516497. 096 |
| M229T501 | 229. 1435012 | 501. 318 | 2495925. 843 |
| M229T526 | 229. 1429786 | 526. 124 | 2815271. 988 |
| M229T747 | 229. 1800781 | 747. 194 | 1660268. 004 |
| M229T710 | 229. 1798097 | 710. 246 | 2160859. 252 |
| M229T764 | 229. 1799129 | 764. 034 | 1648785. 11  |
| M229T773 | 229. 1800539 | 773. 333 | 882597. 4543 |
| M229T72  | 229. 458494  | 72. 0941 | 4156235. 858 |
| M230T125 | 230. 0120166 | 125. 274 | 316234. 0642 |
| M230T369 | 230. 0296901 | 368. 559 | 728490. 7422 |
| M230T270 | 230. 066135  | 269. 798 | 476564. 2186 |
| M230T293 | 230. 0659805 | 292. 621 | 629079. 0975 |
| M230T83  | 230. 065302  | 82. 8986 | 15107215. 69 |
| M230T146 | 230. 0660525 | 146. 08  | 2702204. 351 |
| M230T442 | 230. 1004083 | 442. 399 | 1912058. 639 |
| M230T187 | 230. 1021538 | 186. 689 | 4787786. 267 |
| M230T335 | 230. 1023822 | 335. 153 | 1289802. 6   |
| M230T147 | 230. 1021699 | 147. 455 | 1843913. 866 |
| M230T224 | 230. 1021718 | 224. 484 | 19973178. 84 |
| M230T217 | 230. 1021992 | 216. 95  | 11557580. 05 |
| M230T246 | 230. 102153  | 246. 013 | 2934808. 635 |
| M230T294 | 230. 10246   | 294. 152 | 1992379. 971 |
| M230T358 | 230. 1025218 | 357. 746 | 4109125. 326 |
| M230T264 | 230. 102515  | 264. 434 | 2225596. 531 |
| M230T546 | 230. 1464421 | 546. 308 | 3479873. 354 |
| M231T583 | 230. 9849721 | 582. 96  | 1437441. 201 |
| M231T726 | 230. 9848993 | 725. 713 | 634877. 5077 |
| M231T411 | 231. 0288623 | 411. 444 | 1346768. 207 |
| M231T391 | 231. 0322478 | 391. 341 | 710431. 576  |
| M231T291 | 231. 0498313 | 291. 076 | 1911338. 407 |
| M231T106 | 231. 0497229 | 105. 537 | 5915096. 495 |
| M231T196 | 231. 0501889 | 195. 791 | 8410129. 967 |
| M231T241 | 231. 0480497 | 240. 733 | 12136377. 36 |
| M231T146 | 231. 0502171 | 146. 08  | 3802673. 301 |
| M231T290 | 231. 0722384 | 289. 534 | 558224. 3309 |
| M231T537 | 231. 0764502 | 537. 051 | 400807. 1372 |
| M231T399 | 231. 0765138 | 399. 086 | 851686. 5682 |
| M231T508 | 231. 0864658 | 507. 55  | 1827142. 369 |
| M231T299 | 231. 0864667 | 298. 619 | 2463150. 886 |
| M231T223 | 231. 1057381 | 222. 943 | 1892760. 711 |
| M231T234 | 231. 1055978 | 233. 519 | 315692. 2265 |
| M231T376 | 231. 122682  | 376. 15  | 13845768. 16 |
| M231T387 | 231. 1226406 | 386. 78  | 4038329. 182 |
| M231T184 | 231. 1339164 | 183. 708 | 3785508. 279 |
| M231T229 | 231. 1339584 | 228. 961 | 3340862. 241 |
| M231T197 | 231. 1339358 | 197. 335 | 6114669. 931 |
| M231T492 | 231. 1589093 | 491. 99  | 1487081. 845 |

|            |              |           |              |
|------------|--------------|-----------|--------------|
| M232T767   | 231. 9429838 | 767. 145  | 3352879. 85  |
| M232T795   | 231. 9431262 | 794. 753  | 2368106. 9   |
| M232T665   | 231. 9425241 | 664. 565  | 1006223. 205 |
| M232T811   | 231. 9431067 | 811. 292  | 4283755. 791 |
| M232T740   | 231. 9431078 | 739. 509  | 3063679. 879 |
| M232T726   | 231. 9430762 | 725. 713  | 2235249. 969 |
| M232T82    | 232. 0447055 | 81. 8855  | 8386816. 358 |
| M232T241   | 232. 0531666 | 240. 733  | 1054396. 165 |
| M232T327   | 232. 0581831 | 327. 449  | 2978646. 487 |
| M232T523   | 232. 0602375 | 523. 055  | 15061805. 52 |
| M232T405   | 232. 0616054 | 405. 254  | 3144852. 427 |
| M232T490   | 232. 060324  | 490. 434  | 11046140. 05 |
| M232T268   | 232. 0716636 | 267. 702  | 4146857. 652 |
| M232T90    | 232. 0817052 | 89. 8937  | 11237063. 39 |
| M232T96    | 232. 0816565 | 96. 4922  | 6520905. 038 |
| M232T83    | 232. 0816692 | 82. 8986  | 3439117. 626 |
| M232T147   | 232. 0814008 | 147. 455  | 1560770. 447 |
| M232T107   | 232. 0816573 | 106. 648  | 4339360. 656 |
| M232T170   | 232. 0816655 | 170. 049  | 1803039. 61  |
| M232T326   | 232. 1144017 | 325. 901  | 26183755. 37 |
| M232T422   | 232. 1176846 | 422. 362  | 657957. 0826 |
| M232T361   | 232. 1177159 | 360. 831  | 1922517. 071 |
| M232T308_1 | 232. 1177729 | 307. 616  | 2851121329   |
| M232T215   | 232. 1178472 | 215. 4    | 632081. 9501 |
| M232T375   | 232. 1207077 | 374. 746  | 1914161. 982 |
| M232T308_2 | 232. 2378624 | 307. 616  | 1603409. 95  |
| M233T522   | 233. 0446171 | 521. 5    | 1755617. 454 |
| M233T365   | 233. 0407487 | 365. 475  | 485349. 5243 |
| M233T569   | 233. 0437496 | 569. 091  | 3597378. 224 |
| M233T552   | 233. 0454044 | 552. 493  | 2671029. 803 |
| M233T106   | 233. 0660152 | 105. 537  | 11029855. 52 |
| M233T127   | 233. 0655119 | 126. 755  | 9158213. 485 |
| M233T202   | 233. 0655337 | 201. 897  | 2093967. 277 |
| M233T523   | 233. 0633879 | 523. 055  | 1899306. 751 |
| M233T146   | 233. 0648982 | 146. 08   | 10986591. 62 |
| M233T490   | 233. 0635546 | 490. 434  | 1608962. 652 |
| M233T324_1 | 233. 0651895 | 324. 413  | 1237366. 007 |
| M233T268   | 233. 0749169 | 267. 702  | 410678. 9886 |
| M233T83    | 233. 0765127 | 82. 8986  | 6659881. 859 |
| M233T139   | 233. 1020128 | 138. 719  | 2100068. 574 |
| M233T441   | 233. 1021358 | 440. 833  | 426432. 6983 |
| M233T324_2 | 233. 1028468 | 324. 413  | 2163882. 864 |
| M233T308_1 | 233. 1226675 | 307. 616  | 287857175    |
| M233T50    | 233. 1539121 | 49. 81385 | 298879. 135  |
| M233T817   | 233. 1532828 | 817. 214  | 2342024. 391 |
| M233T67    | 233. 1534099 | 67. 1831  | 923821. 9895 |
| M233T33    | 233. 1535101 | 32. 8715  | 1916794. 443 |
| M233T792   | 233. 1532592 | 791. 678  | 2228123. 532 |
| M233T829   | 233. 1533789 | 829. 321  | 10859730. 11 |
| M233T782   | 233. 1533011 | 782. 5    | 1802636. 909 |
| M233T308_2 | 233. 2370219 | 307. 616  | 1174698. 465 |
| M234T81    | 234. 0607667 | 80. 6174  | 4690328. 84  |
| M234T453   | 234. 0760767 | 453. 126  | 4325557. 114 |
| M234T494   | 234. 0759645 | 493. 56   | 4903327. 474 |

|          |              |           |              |
|----------|--------------|-----------|--------------|
| M234T425 | 234. 0758578 | 425. 439  | 12141162. 18 |
| M234T475 | 234. 076211  | 474. 888  | 2152415. 95  |
| M234T532 | 234. 075956  | 532. 372  | 1201003. 284 |
| M234T439 | 234. 0760446 | 439. 27   | 7508613. 736 |
| M234T100 | 234. 0972266 | 100. 283  | 2600940. 065 |
| M234T173 | 234. 0966782 | 173. 092  | 5827871. 818 |
| M234T486 | 234. 1332189 | 485. 784  | 642022. 0411 |
| M234T831 | 234. 1569772 | 830. 813  | 1698840. 664 |
| M235T67  | 234. 982455  | 67. 1831  | 285199. 5345 |
| M235T822 | 234. 9926322 | 821. 831  | 1648994. 62  |
| M235T258 | 235. 0238469 | 258. 208  | 188683. 2169 |
| M235T364 | 235. 0232191 | 363. 928  | 1350751. 82  |
| M235T405 | 235. 0242062 | 405. 254  | 994585. 698  |
| M235T106 | 235. 0447502 | 105. 537  | 5573093. 749 |
| M235T83  | 235. 0447739 | 82. 8986  | 6925458. 036 |
| M235T455 | 235. 0602465 | 454. 645  | 1124866. 564 |
| M235T433 | 235. 060427  | 433. 06   | 1608272. 638 |
| M235T523 | 235. 0602856 | 523. 055  | 1670649. 176 |
| M235T556 | 235. 0601035 | 555. 524  | 1262177. 057 |
| M235T413 | 235. 071235  | 413. 006  | 6909724. 323 |
| M235T331 | 235. 0704185 | 330. 552  | 5205971. 433 |
| M235T261 | 235. 0712561 | 261. 138  | 2659048. 382 |
| M235T220 | 235. 0713116 | 219. 979  | 3969925. 757 |
| M235T425 | 235. 0788592 | 425. 439  | 1541312. 856 |
| M235T452 | 235. 0796459 | 451. 616  | 409011. 4253 |
| M235T439 | 235. 0795947 | 439. 27   | 899992. 6795 |
| M235T149 | 235. 0815631 | 148. 981  | 3403803. 155 |
| M235T215 | 235. 0818565 | 215. 4    | 767631. 7945 |
| M235T622 | 235. 0968077 | 621. 547  | 357242. 758  |
| M235T338 | 235. 1075667 | 338. 222  | 4134632. 415 |
| M235T346 | 235. 1186146 | 345. 761  | 561643. 899  |
| M235T421 | 235. 1191608 | 420. 799  | 2323980. 756 |
| M235T308 | 235. 1256184 | 307. 616  | 1974078. 793 |
| M236T52  | 235. 95232   | 52. 14365 | 74975. 93435 |
| M236T61  | 235. 9522443 | 61. 4369  | 375809. 8516 |
| M236T43  | 235. 9523388 | 43. 1613  | 830310. 504  |
| M236T143 | 236. 0399603 | 143. 174  | 7214831. 604 |
| M236T125 | 236. 0399057 | 125. 274  | 6153419. 523 |
| M236T311 | 236. 054626  | 310. 626  | 10677708. 91 |
| M236T390 | 236. 054832  | 389. 839  | 1886095. 856 |
| M236T224 | 236. 0554287 | 224. 484  | 45340314. 16 |
| M236T372 | 236. 0547711 | 371. 633  | 1832273. 994 |
| M236T300 | 236. 055439  | 300. 176  | 10242002. 57 |
| M236T358 | 236. 0549527 | 357. 746  | 15236055. 82 |
| M236T405 | 236. 0548533 | 405. 254  | 1533282. 876 |
| M236T467 | 236. 0717375 | 467. 127  | 485773. 7585 |
| M236T89  | 236. 0763443 | 88. 8247  | 12605262. 43 |
| M236T413 | 236. 0902186 | 413. 006  | 8533680. 721 |
| M236T456 | 236. 0922075 | 456. 2    | 2146421. 018 |
| M236T293 | 236. 091419  | 292. 621  | 950328. 7454 |
| M236T246 | 236. 0925    | 246. 474  | 2102872. 293 |
| M236T476 | 236. 0924234 | 476. 451  | 1465613. 156 |
| M236T281 | 236. 0916516 | 281. 097  | 858882. 1143 |
| M236T318 | 236. 089335  | 318. 232  | 1225793. 463 |

|            |              |          |              |
|------------|--------------|----------|--------------|
| M236T381   | 236. 0899175 | 380. 608 | 1276441. 685 |
| M236T343   | 236. 0893564 | 342. 819 | 9564977. 129 |
| M236T710   | 236. 1037921 | 710. 246 | 304427. 4599 |
| M236T314   | 236. 1030417 | 313. 612 | 666128. 267  |
| M236T385   | 236. 1027248 | 385. 225 | 3921708. 535 |
| M236T421   | 236. 1227243 | 420. 799 | 175967. 8566 |
| M237T617   | 236. 9783251 | 616. 891 | 1466088. 165 |
| M237T149   | 237. 0065152 | 148. 981 | 957152. 1326 |
| M237T435   | 237. 0400029 | 434. 617 | 2309270. 875 |
| M237T356   | 237. 0399144 | 356. 274 | 5177472. 026 |
| M237T317   | 237. 0399227 | 316. 709 | 2835896. 503 |
| M237T476   | 237. 0396434 | 476. 451 | 2616512. 769 |
| M237T332   | 237. 0400079 | 332. 105 | 4209181. 878 |
| M237T381   | 237. 0397614 | 380. 608 | 14645943. 61 |
| M237T261   | 237. 0396138 | 261. 138 | 953684. 4132 |
| M237T402   | 237. 0399075 | 402. 144 | 3549405. 731 |
| M237T284   | 237. 0509796 | 283. 634 | 630312. 1863 |
| M237T311   | 237. 0594526 | 310. 626 | 1995909. 925 |
| M237T106   | 237. 0603519 | 105. 537 | 19249011. 2  |
| M237T84    | 237. 0604744 | 83. 9405 | 24900803. 29 |
| M237T224   | 237. 0591425 | 224. 484 | 6635699. 701 |
| M237T358   | 237. 059608  | 357. 746 | 3225804. 43  |
| M237T169   | 237. 060444  | 168. 507 | 14499330. 37 |
| M237T146   | 237. 0604467 | 146. 08  | 11638528. 21 |
| M237T480   | 237. 0760559 | 479. 541 | 7582653. 708 |
| M237T498   | 237. 076085  | 498. 202 | 60960165. 34 |
| M237T410   | 237. 0762054 | 409. 881 | 919494. 5095 |
| M237T466   | 237. 0756108 | 465. 575 | 1427946. 875 |
| M237T472   | 237. 0869647 | 471. 768 | 1307749. 914 |
| M237T290   | 237. 0865665 | 289. 534 | 1152218. 895 |
| M237T226   | 237. 0872769 | 225. 965 | 2226974. 596 |
| M237T364   | 237. 0879724 | 363. 928 | 778912. 4735 |
| M237T343   | 237. 0950737 | 342. 819 | 1000113. 843 |
| M237T634   | 237. 1123115 | 633. 832 | 985496. 4017 |
| M237T450   | 237. 1237516 | 450. 052 | 902889. 907  |
| M237T373   | 237. 1341517 | 373. 196 | 998684. 5235 |
| M237T710   | 237. 1480576 | 710. 246 | 1837806. 458 |
| M238T151   | 238. 0189199 | 150. 528 | 204998. 8057 |
| M238T381   | 238. 0431486 | 380. 608 | 1244486. 857 |
| M238T455   | 238. 0687599 | 454. 645 | 734126. 0437 |
| M238T291   | 238. 0709798 | 291. 076 | 4273989. 705 |
| M238T375   | 238. 0706115 | 374. 746 | 3621698. 327 |
| M238T253   | 238. 0710318 | 252. 703 | 1534854. 263 |
| M238T356_1 | 238. 0705602 | 356. 274 | 4114850. 764 |
| M238T188   | 238. 0711278 | 188. 174 | 5474094. 06  |
| M238T321   | 238. 0706168 | 321. 312 | 4039168. 912 |
| M238T263   | 238. 0710382 | 263. 129 | 4448027. 947 |
| M238T173   | 238. 0710773 | 173. 092 | 2824167. 888 |
| M238T424   | 238. 0689344 | 423. 877 | 812880. 9311 |
| M238T467   | 238. 068937  | 467. 127 | 668280. 982  |
| M238T394   | 238. 0686605 | 394. 467 | 1245465. 261 |
| M238T343   | 238. 0704964 | 342. 819 | 3801074. 862 |
| M238T407   | 238. 0688759 | 406. 813 | 1358352. 401 |
| M238T312   | 238. 0706014 | 312. 058 | 1940957. 172 |

|            |              |          |              |
|------------|--------------|----------|--------------|
| M238T498   | 238. 0767417 | 498. 202 | 6335350. 455 |
| M238T405   | 238. 0918998 | 405. 254 | 248374. 5704 |
| M238T480   | 238. 1072764 | 479. 541 | 29689310. 6  |
| M238T223   | 238. 1076696 | 222. 943 | 1144633. 484 |
| M238T356_2 | 238. 1077161 | 356. 274 | 2705275. 664 |
| M238T235   | 238. 1076721 | 234. 972 | 969077. 7915 |
| M238T315   | 238. 1294281 | 315. 162 | 4391024. 535 |
| M239T73    | 238. 9856658 | 73. 3444 | 14082728. 69 |
| M239T356   | 239. 0188359 | 356. 274 | 740326. 6231 |
| M239T231   | 239. 0184836 | 230. 507 | 568377. 3556 |
| M239T160   | 239. 0311974 | 159. 635 | 5850930. 6   |
| M239T411_1 | 239. 0545974 | 411. 444 | 2441023. 824 |
| M239T145   | 239. 0548496 | 144. 706 | 1902015. 05  |
| M239T335   | 239. 054385  | 335. 153 | 5159381. 609 |
| M239T167   | 239. 0552705 | 167. 01  | 1847260. 548 |
| M239T396   | 239. 0545463 | 396. 023 | 3185816. 067 |
| M239T376_1 | 239. 0547135 | 376. 15  | 3898742. 916 |
| M239T220   | 239. 0548987 | 219. 979 | 6708726. 885 |
| M239T767   | 239. 0575713 | 767. 145 | 13816183. 65 |
| M239T385_1 | 239. 0556393 | 385. 225 | 2611936. 831 |
| M239T359   | 239. 0557014 | 359. 297 | 6848690. 543 |
| M239T131   | 239. 0665821 | 131. 207 | 3162522. 015 |
| M239T266   | 239. 0741877 | 265. 541 | 4904479. 115 |
| M239T271   | 239. 0742669 | 270. 519 | 3064598. 208 |
| M239T623   | 239. 0743456 | 623. 098 | 15762317. 47 |
| M239T187   | 239. 074292  | 186. 689 | 8011028. 391 |
| M239T537   | 239. 0743292 | 537. 051 | 6507481. 862 |
| M239T309   | 239. 0742823 | 309. 091 | 10443207. 12 |
| M239T411_2 | 239. 0743605 | 411. 444 | 7846102. 497 |
| M239T681   | 239. 0741725 | 681. 406 | 13327933. 55 |
| M239T600   | 239. 0742331 | 599. 904 | 7872921. 062 |
| M239T375   | 239. 0744037 | 374. 746 | 7637187. 918 |
| M239T557   | 239. 0742469 | 557. 078 | 15127781. 36 |
| M239T209   | 239. 0743487 | 209. 472 | 11236796. 22 |
| M239T807   | 239. 0739138 | 806. 698 | 9015874. 722 |
| M239T436   | 239. 0741165 | 436. 18  | 11462980. 66 |
| M239T147   | 239. 0758429 | 147. 455 | 20046972. 31 |
| M239T817   | 239. 0743079 | 817. 214 | 14910625. 18 |
| M239T293   | 239. 074467  | 292. 621 | 8533479. 956 |
| M239T449   | 239. 0741242 | 448. 527 | 5884168. 058 |
| M239T221   | 239. 0743273 | 221. 453 | 10668787. 93 |
| M239T609   | 239. 0742624 | 609. 19  | 12130586. 33 |
| M239T107   | 239. 0758485 | 106. 648 | 15988576. 1  |
| M239T157   | 239. 0738878 | 156. 582 | 16070332. 34 |
| M239T245   | 239. 0743801 | 244. 891 | 15433394. 33 |
| M239T517   | 239. 074327  | 516. 908 | 6626894. 165 |
| M239T388   | 239. 0743955 | 388. 326 | 9734988. 634 |
| M239T586   | 239. 0743866 | 586. 044 | 10603826. 53 |
| M239T509   | 239. 0742736 | 509. 11  | 10668303. 58 |
| M239T674   | 239. 0743285 | 673. 771 | 9560076. 235 |
| M239T196   | 239. 0743594 | 195. 791 | 8767400. 882 |
| M239T173   | 239. 0742782 | 173. 092 | 19883882. 22 |
| M239T90    | 239. 0767398 | 89. 8937 | 25521043. 27 |
| M239T716   | 239. 0738647 | 716. 391 | 19489825. 82 |

|            |              |          |              |
|------------|--------------|----------|--------------|
| M239T280   | 239. 0742628 | 280. 275 | 6974182. 812 |
| M239T424   | 239. 0742381 | 423. 877 | 8826750. 447 |
| M239T467   | 239. 0743172 | 467. 127 | 18737336. 96 |
| M239T489   | 239. 0743437 | 488. 885 | 13182503. 79 |
| M239T340   | 239. 0741601 | 339. 772 | 12900387. 51 |
| M239T402   | 239. 0743858 | 402. 144 | 9974524. 597 |
| M239T358   | 239. 0743395 | 357. 746 | 9109431. 725 |
| M239T575   | 239. 074327  | 575. 222 | 9808170. 502 |
| M239T640   | 239. 0743019 | 640. 057 | 9332580. 015 |
| M239T323   | 239. 0742321 | 322. 862 | 7920672. 5   |
| M239T657   | 239. 0741289 | 656. 84  | 14211026. 79 |
| M239T733   | 239. 0739532 | 733. 352 | 15773418. 91 |
| M239T773_1 | 239. 0739216 | 773. 333 | 23452846. 66 |
| M239T835   | 239. 0741992 | 835. 329 | 10282310. 85 |
| M239T413   | 239. 0916343 | 413. 006 | 733149. 1302 |
| M239T355   | 239. 0915892 | 354. 719 | 762901. 7042 |
| M239T253   | 239. 0908252 | 252. 703 | 1638563. 625 |
| M239T376_2 | 239. 0914525 | 376. 15  | 1127849. 252 |
| M239T405   | 239. 0915354 | 405. 254 | 1118841. 592 |
| M239T385_2 | 239. 0916894 | 385. 225 | 2224466. 704 |
| M239T411_3 | 239. 1029932 | 411. 444 | 398298. 1006 |
| M239T350   | 239. 1030371 | 350. 108 | 7735805. 732 |
| M239T306   | 239. 1136747 | 306. 164 | 3765448. 304 |
| M239T235   | 239. 1137075 | 234. 972 | 5843261. 379 |
| M239T535   | 239. 1276562 | 535. 488 | 1777967. 529 |
| M239T551   | 239. 1283514 | 550. 932 | 1185128. 238 |
| M239T611   | 239. 1275768 | 610. 742 | 1070234. 158 |
| M239T571   | 239. 1276229 | 570. 599 | 2033859. 438 |
| M239T419   | 239. 1275912 | 419. 237 | 3020032. 03  |
| M239T773_2 | 239. 1271812 | 773. 333 | 29647701. 25 |
| M239T814   | 239. 1269567 | 814. 118 | 1978677. 745 |
| M239T703   | 239. 1643559 | 702. 622 | 922725. 596  |
| M239T743   | 239. 164406  | 742. 631 | 1058944. 095 |
| M240T109   | 240. 034128  | 109. 475 | 67083579. 34 |
| M240T145   | 240. 0500938 | 144. 706 | 1206310. 082 |
| M240T288   | 240. 0508964 | 287. 981 | 1321027. 992 |
| M240T238   | 240. 0501047 | 238. 024 | 1899682. 641 |
| M240T178   | 240. 0502832 | 177. 649 | 780199. 3526 |
| M240T335   | 240. 0579321 | 335. 153 | 537227. 8207 |
| M240T220   | 240. 058203  | 219. 979 | 699513. 7656 |
| M240T47    | 240. 0798796 | 47. 4553 | 147384. 1922 |
| M240T57    | 240. 0800227 | 56. 668  | 197157. 4768 |
| M240T65    | 240. 0799951 | 65. 4825 | 572674. 9244 |
| M240T33    | 240. 0799169 | 32. 8715 | 230288. 6569 |
| M240T346_1 | 240. 0863006 | 345. 761 | 2603608. 557 |
| M240T353   | 240. 0861348 | 353. 163 | 3510928. 172 |
| M240T327   | 240. 0873451 | 327. 449 | 5641534. 084 |
| M240T453   | 240. 0870428 | 453. 126 | 2227820. 471 |
| M240T373   | 240. 0871858 | 373. 196 | 4981872. 305 |
| M240T388   | 240. 0873825 | 388. 326 | 3590689. 93  |
| M240T294   | 240. 0870409 | 294. 152 | 3133357. 614 |
| M240T362   | 240. 087445  | 362. 384 | 6488895. 278 |
| M240T200   | 240. 0862267 | 200. 362 | 2069034. 372 |
| M240T402   | 240. 0861886 | 402. 144 | 1543928. 968 |



|            |             |         |             |
|------------|-------------|---------|-------------|
| M240T146   | 240.0861857 | 146.08  | 1377355.176 |
| M240T215   | 240.0976592 | 215.4   | 5691361.158 |
| M240T261   | 240.0972078 | 261.138 | 2585162.531 |
| M240T286   | 240.097596  | 286.433 | 3821409.629 |
| M240T187   | 240.0986213 | 186.689 | 2121968.735 |
| M240T346_2 | 240.0976662 | 345.761 | 3993587.495 |
| M240T458   | 240.1232719 | 457.763 | 1207585.913 |
| M241T87    | 240.9707223 | 87.426  | 7438706.336 |
| M241T83    | 241.0105526 | 82.8986 | 6323432.63  |
| M241T149   | 241.0292403 | 148.981 | 790655.9692 |
| M241T324   | 241.0345776 | 324.413 | 14513580.28 |
| M241T334   | 241.034561  | 333.655 | 21617609.2  |
| M241T109   | 241.0388101 | 109.475 | 1764934.27  |
| M241T767   | 241.0559546 | 767.145 | 1262966.462 |
| M241T413_1 | 241.0713619 | 413.006 | 2063368.205 |
| M241T353   | 241.0701492 | 353.163 | 2417849.623 |
| M241T293   | 241.0705997 | 292.621 | 2384484.647 |
| M241T572   | 241.0712138 | 572.152 | 616070.3726 |
| M241T332   | 241.0709038 | 332.105 | 3818692.528 |
| M241T378   | 241.0713795 | 377.64  | 2849007.882 |
| M241T291   | 241.0824729 | 291.076 | 927236.9346 |
| M241T221   | 241.0815856 | 221.453 | 924564.6843 |
| M241T715   | 241.0869694 | 714.841 | 2026777.996 |
| M241T344   | 241.0816252 | 344.233 | 23722400.41 |
| M241T455   | 241.1073642 | 454.645 | 2184451.072 |
| M241T413_2 | 241.1058747 | 413.006 | 1674783.278 |
| M241T398   | 241.1073703 | 397.585 | 6082012.202 |
| M241T379   | 241.1073235 | 379.066 | 3610717.681 |
| M241T475   | 241.1074002 | 474.888 | 3138063.964 |
| M241T489   | 241.1058085 | 488.885 | 933854.1548 |
| M241T428   | 241.1073253 | 428.448 | 3273244.133 |
| M241T202   | 241.1182126 | 201.897 | 1182263.419 |
| M241T361   | 241.1202049 | 360.831 | 37728552.21 |
| M241T356   | 241.1311379 | 356.274 | 1236850.354 |
| M241T244   | 241.1295902 | 243.976 | 715148.3729 |
| M241T169   | 241.1304533 | 168.507 | 2783865.882 |
| M241T581   | 241.1438132 | 581.442 | 2506033.051 |
| M241T372   | 241.1438102 | 371.633 | 6794704.85  |
| M241T418   | 241.1437334 | 417.689 | 728561.4407 |
| M241T808   | 241.1801145 | 808.251 | 6496170.986 |
| M241T747   | 241.1801138 | 747.194 | 951708.7062 |
| M241T819   | 241.1789614 | 818.743 | 1888268.191 |
| M241T772   | 241.1800349 | 771.785 | 2232033.984 |
| M241T796   | 241.1799125 | 796.202 | 6407282.741 |
| M241T784_1 | 241.1800918 | 784.051 | 3253115.615 |
| M241T835   | 241.1799762 | 835.329 | 865487.5638 |
| M241T762   | 241.1799954 | 762.482 | 1024052.285 |
| M241T33    | 241.2157416 | 32.8715 | 403817.1324 |
| M241T784_2 | 241.2165674 | 784.051 | 2041740.454 |
| M242T226   | 242.0061224 | 225.965 | 179295.2119 |
| M242T87    | 242.0054728 | 87.426  | 4118032.72  |
| M242T288   | 242.0296698 | 287.981 | 4079646.802 |
| M242T450   | 242.029583  | 450.052 | 320112.3324 |
| M242T142   | 242.0515404 | 141.655 | 15113845.34 |

|            |              |          |              |
|------------|--------------|----------|--------------|
| M242T173   | 242. 0514467 | 173. 092 | 3811154. 915 |
| M242T778   | 242. 0510565 | 777. 92  | 3490179. 824 |
| M242T111   | 242. 0487297 | 110. 926 | 55125574. 99 |
| M242T92    | 242. 0511415 | 91. 9113 | 93977272. 63 |
| M242T81    | 242. 0660493 | 80. 6174 | 4103073. 39  |
| M242T187   | 242. 0653747 | 186. 689 | 2027517. 197 |
| M242T147   | 242. 0662656 | 147. 455 | 2189503. 398 |
| M242T212   | 242. 0655011 | 212. 366 | 1842683. 296 |
| M242T255   | 242. 0654733 | 255. 113 | 1488670. 018 |
| M242T224   | 242. 0654269 | 224. 484 | 1410541. 096 |
| M242T347   | 242. 0662912 | 347. 166 | 899444. 8098 |
| M242T134   | 242. 0662848 | 134. 253 | 2748589. 343 |
| M242T381   | 242. 0662252 | 380. 608 | 550924. 2652 |
| M242T200   | 242. 0662665 | 200. 362 | 2496544. 397 |
| M242T170   | 242. 0662647 | 170. 049 | 3390945. 986 |
| M242T167   | 242. 0769861 | 167. 01  | 47873423. 87 |
| M242T455   | 242. 1028446 | 454. 645 | 674537. 0628 |
| M242T355   | 242. 1027884 | 354. 719 | 2306350. 259 |
| M242T375_1 | 242. 1028225 | 374. 746 | 866438. 5486 |
| M242T464   | 242. 1028017 | 464. 011 | 778085. 5678 |
| M242T268   | 242. 102125  | 268. 419 | 783686. 7956 |
| M242T340   | 242. 1027453 | 339. 772 | 2660990. 799 |
| M242T312   | 242. 1026985 | 312. 058 | 1209484. 798 |
| M242T375_2 | 242. 1420948 | 374. 746 | 219671. 4743 |
| M242T441   | 242. 1386226 | 440. 833 | 635181. 0433 |
| M242T571   | 242. 1386071 | 570. 599 | 3278364. 045 |
| M242T603   | 242. 1752944 | 603. 04  | 27588141. 07 |
| M242T654   | 242. 1753313 | 653. 835 | 1266824. 288 |
| M242T808   | 242. 1833167 | 808. 251 | 776830. 2075 |
| M243T209_1 | 242. 9348711 | 209. 472 | 515359. 4817 |
| M243T87    | 242. 9382485 | 87. 426  | 27486062. 31 |
| M243T52    | 242. 9434426 | 51. 653  | 205604. 4109 |
| M243T140   | 242. 9422744 | 140. 209 | 4062926. 551 |
| M243T69    | 242. 9432523 | 69. 1983 | 1384854. 552 |
| M243T118_1 | 242. 9424328 | 117. 954 | 6350764. 675 |
| M243T34    | 242. 9431438 | 34. 4117 | 1737295. 661 |
| M243T72    | 242. 9771133 | 72. 0941 | 2109393. 719 |
| M243T33    | 243. 0049548 | 32. 8715 | 569045. 0897 |
| M243T107   | 243. 0263878 | 106. 648 | 10296155. 11 |
| M243T118_2 | 243. 0265057 | 117. 954 | 7109404. 519 |
| M243T290   | 243. 0327107 | 289. 534 | 325788. 3159 |
| M243T220   | 243. 0435005 | 219. 979 | 547741. 6365 |
| M243T188_1 | 243. 0497938 | 188. 174 | 1138875. 936 |
| M243T146   | 243. 0497791 | 146. 08  | 1544457. 097 |
| M243T334   | 243. 0470947 | 333. 655 | 11526698. 23 |
| M243T124   | 243. 0614555 | 123. 792 | 2347230. 899 |
| M243T209_2 | 243. 0619764 | 209. 472 | 307571856. 8 |
| M243T264   | 243. 0628319 | 263. 845 | 368929. 4814 |
| M243T108   | 243. 0613325 | 108. 082 | 8116997. 919 |
| M243T167   | 243. 0811442 | 167. 01  | 3834830. 751 |
| M243T329   | 243. 086357  | 328. 999 | 1465839. 404 |
| M243T353   | 243. 0838557 | 353. 163 | 2508815. 312 |
| M243T421   | 243. 0866926 | 420. 799 | 1010557. 997 |
| M243T396   | 243. 086612  | 396. 023 | 811615. 6988 |

|            |              |          |              |
|------------|--------------|----------|--------------|
| M243T305   | 243. 0867112 | 304. 743 | 1204170. 538 |
| M243T518   | 243. 0854233 | 518. 474 | 618808. 1749 |
| M243T188_2 | 243. 0974508 | 188. 174 | 1964015. 359 |
| M243T175   | 243. 0974808 | 174. 576 | 1938329. 593 |
| M243T343   | 243. 0973702 | 342. 819 | 1681482. 518 |
| M243T202   | 243. 1088571 | 201. 897 | 1485484. 875 |
| M243T469   | 243. 1225949 | 468. 69  | 20679988. 69 |
| M243T382   | 243. 1225924 | 382. 171 | 17385419. 42 |
| M243T408   | 243. 1225756 | 408. 368 | 37003112. 35 |
| M243T490   | 243. 1227648 | 490. 434 | 1921684. 963 |
| M243T503   | 243. 1240373 | 502. 873 | 696838. 7312 |
| M243T450   | 243. 1225441 | 450. 052 | 1946245. 721 |
| M243T611   | 243. 1594869 | 610. 742 | 9729841. 304 |
| M243T603   | 243. 1773811 | 603. 04  | 3455232. 762 |
| M243T817   | 243. 1954581 | 817. 214 | 17167184. 01 |
| M243T766   | 243. 1954331 | 765. 588 | 3897535. 272 |
| M244T76    | 243. 9292824 | 76. 0763 | 33571531. 28 |
| M244T387   | 244. 0366128 | 386. 78  | 921333. 3178 |
| M244T81    | 244. 0442484 | 80. 6174 | 7763415. 86  |
| M244T209   | 244. 0655104 | 209. 472 | 28584569. 07 |
| M244T106   | 244. 0813315 | 105. 537 | 9186335. 287 |
| M244T293   | 244. 081512  | 292. 621 | 1755051. 652 |
| M244T175   | 244. 0813974 | 174. 576 | 5499073. 4   |
| M244T146   | 244. 0818151 | 146. 08  | 4068504. 562 |
| M244T324   | 244. 0817847 | 324. 413 | 4231969. 916 |
| M244T329   | 244. 117969  | 328. 999 | 6230948. 197 |
| M244T288   | 244. 1179676 | 287. 981 | 5209986. 146 |
| M244T269   | 244. 1179871 | 269. 337 | 2471111. 66  |
| M244T235   | 244. 1180048 | 234. 972 | 2561887. 09  |
| M244T340   | 244. 1179543 | 339. 772 | 3785180. 111 |
| M244T408   | 244. 121574  | 408. 368 | 1280691. 346 |
| M244T291   | 244. 12877   | 291. 076 | 5862771. 628 |
| M244T469   | 244. 1260719 | 468. 69  | 2325294. 946 |
| M244T169   | 244. 1288713 | 168. 507 | 4539099. 164 |
| M244T611   | 244. 1623087 | 610. 742 | 1396683. 342 |
| M244T75    | 244. 4311641 | 74. 6705 | 5646240. 648 |
| M245T87    | 244. 9358454 | 87. 426  | 5531280. 539 |
| M245T111   | 244. 9631135 | 110. 926 | 2377701. 718 |
| M245T568   | 244. 9839379 | 567. 543 | 1469705. 688 |
| M245T552   | 244. 9848656 | 552. 493 | 7493244. 317 |
| M245T835   | 244. 9848374 | 835. 329 | 2892991. 464 |
| M245T671   | 245. 0430824 | 670. 674 | 1363108. 559 |
| M245T654   | 245. 042936  | 653. 835 | 1142952. 019 |
| M245T261   | 245. 0590139 | 261. 138 | 322050. 7519 |
| M245T208   | 245. 0632434 | 207. 935 | 9768310. 696 |
| M245T331   | 245. 0653108 | 330. 552 | 2741294. 934 |
| M245T106   | 245. 0657964 | 105. 537 | 4434726. 588 |
| M245T146   | 245. 0654174 | 146. 08  | 3031049. 631 |
| M245T343   | 245. 0658348 | 342. 819 | 2635311. 2   |
| M245T84    | 245. 0768749 | 83. 9405 | 1692618. 401 |
| M245T492   | 245. 0808669 | 491. 99  | 298287. 2834 |
| M245T421   | 245. 0930836 | 420. 799 | 3710177. 488 |
| M245T444   | 245. 1021846 | 443. 961 | 1047760. 611 |
| M245T387   | 245. 1021529 | 386. 78  | 2692358. 977 |

|           |              |          |              |
|-----------|--------------|----------|--------------|
| M245T104  | 245. 113235  | 104. 493 | 3085148. 027 |
| M245T398  | 245. 1257693 | 397. 585 | 951526. 1281 |
| M245T408  | 245. 1267422 | 408. 368 | 718807. 3878 |
| M245T154  | 245. 123675  | 153. 601 | 5826867. 385 |
| M245T432  | 245. 1385769 | 431. 507 | 2476491. 083 |
| M245T458  | 245. 1386409 | 457. 763 | 830885. 6142 |
| M245T422  | 245. 1386341 | 422. 362 | 3571949. 521 |
| M245T612  | 245. 1386046 | 612. 3   | 777694. 6444 |
| M245T597  | 245. 1386245 | 596. 795 | 1853646. 968 |
| M245T489  | 245. 1385425 | 488. 885 | 545868. 9952 |
| M245T402  | 245. 139479  | 402. 144 | 1015490. 328 |
| M245T584  | 245. 1386314 | 584. 484 | 677931. 4993 |
| M246T329  | 246. 039137  | 328. 999 | 1176238. 025 |
| M246T299  | 246. 0430798 | 298. 619 | 898412. 2238 |
| M246T79   | 246. 0606667 | 79. 4105 | 3910220. 525 |
| M246T179  | 246. 0626808 | 179. 046 | 593021. 9282 |
| M246T540  | 246. 0760388 | 540. 152 | 641800. 9444 |
| M246T574  | 246. 0767114 | 573. 704 | 608429. 7123 |
| M246T315  | 246. 0967919 | 315. 162 | 3450730. 876 |
| M246T106  | 246. 0969092 | 105. 537 | 5205584. 069 |
| M246T421  | 246. 0961454 | 420. 799 | 569730. 0667 |
| M246T293  | 246. 096613  | 292. 621 | 6820685. 502 |
| M246T172  | 246. 0979469 | 171. 546 | 4441508. 977 |
| M246T338  | 246. 0966086 | 338. 222 | 1556229. 621 |
| M246T235  | 246. 0965384 | 234. 972 | 3836383. 078 |
| M246T146  | 246. 0978484 | 146. 08  | 2948096. 569 |
| M246T303  | 246. 0965882 | 303. 259 | 5991216. 095 |
| M246T472  | 246. 1335767 | 471. 768 | 1123598. 687 |
| M247T106  | 247. 0443751 | 105. 537 | 7390119. 06  |
| M247T193  | 247. 0443353 | 192. 769 | 1317450. 487 |
| M247T83_1 | 247. 0448536 | 82. 8986 | 2738755. 914 |
| M247T264  | 247. 0563661 | 263. 845 | 2608655. 994 |
| M247T134  | 247. 0562885 | 134. 253 | 2074324. 82  |
| M247T115  | 247. 0563649 | 115. 123 | 1657521. 086 |
| M247T146  | 247. 0563436 | 146. 08  | 1870778. 53  |
| M247T595  | 247. 0600448 | 595. 35  | 642413. 8008 |
| M247T508  | 247. 0600941 | 507. 55  | 786685. 4848 |
| M247T83_2 | 247. 0923132 | 82. 8986 | 2879801. 718 |
| M247T335  | 247. 1185036 | 335. 153 | 3440666. 853 |
| M247T421  | 247. 1185034 | 420. 799 | 2365707. 561 |
| M247T365  | 247. 1185381 | 365. 475 | 2811185. 145 |
| M247T396  | 247. 1184735 | 396. 023 | 2874087. 523 |
| M247T323  | 247. 1185688 | 322. 862 | 15165759. 26 |
| M247T635  | 247. 1329827 | 635. 37  | 625317. 3088 |
| M247T586  | 247. 1326871 | 586. 044 | 711658. 913  |
| M247T557  | 247. 1539695 | 557. 078 | 220041. 0793 |
| M248T327  | 248. 0321018 | 327. 449 | 300021. 8583 |
| M248T72   | 248. 0389753 | 72. 0941 | 6233219. 35  |
| M248T173  | 248. 0528414 | 173. 092 | 1157710. 684 |
| M248T387  | 248. 0529004 | 386. 78  | 921621. 9172 |
| M248T413  | 248. 0556435 | 413. 006 | 685236. 1471 |
| M248T349  | 248. 0556919 | 348. 668 | 1450332. 827 |
| M248T439  | 248. 0556863 | 439. 27  | 1542865. 19  |
| M248T99   | 248. 076452  | 98. 9649 | 2364358. 287 |

|          |              |          |              |
|----------|--------------|----------|--------------|
| M248T106 | 248. 0769536 | 105. 537 | 2768393. 15  |
| M248T82  | 248. 0766856 | 81. 8855 | 3251983. 851 |
| M248T147 | 248. 0769868 | 147. 455 | 3182612. 857 |
| M248T91  | 248. 076627  | 90. 9026 | 3646841. 075 |
| M248T398 | 248. 0918069 | 397. 585 | 331604. 6164 |
| M248T428 | 248. 0918432 | 428. 448 | 732960. 5315 |
| M248T223 | 248. 1131896 | 222. 943 | 3273368. 912 |
| M248T154 | 248. 1131103 | 153. 601 | 1275835. 192 |
| M248T214 | 248. 1131512 | 213. 897 | 3075239. 398 |
| M248T146 | 248. 1130493 | 146. 08  | 992752. 4045 |
| M248T200 | 248. 1131081 | 200. 362 | 481629. 7727 |
| M249T435 | 248. 9273399 | 434. 617 | 184159. 9408 |
| M249T258 | 249. 0119242 | 258. 208 | 102568. 4432 |
| M249T72  | 249. 024769  | 72. 0941 | 34521406. 03 |
| M249T452 | 249. 0396184 | 451. 616 | 2059634. 813 |
| M249T531 | 249. 0396502 | 530. 804 | 1316721. 997 |
| M249T84  | 249. 0599984 | 83. 9405 | 5807349. 816 |
| M249T209 | 249. 0599258 | 209. 472 | 6987894. 436 |
| M249T91  | 249. 0601337 | 90. 9026 | 5499246. 545 |
| M249T175 | 249. 0593361 | 174. 576 | 7097004. 762 |
| M249T187 | 249. 0611852 | 186. 689 | 10133761. 51 |
| M249T291 | 249. 0612088 | 291. 076 | 26988390. 75 |
| M249T147 | 249. 0610518 | 147. 455 | 10505809. 6  |
| M249T107 | 249. 0610316 | 106. 648 | 14958521. 61 |
| M249T164 | 249. 0612585 | 164. 077 | 13894876. 2  |
| M249T272 | 249. 0872986 | 272. 312 | 117316. 8744 |
| M249T415 | 249. 0865988 | 414. 571 | 2322817. 718 |
| M249T365 | 249. 0871428 | 365. 475 | 2332369. 831 |
| M249T376 | 249. 0870596 | 376. 15  | 1904335. 444 |
| M249T475 | 249. 087286  | 474. 888 | 615089. 2363 |
| M249T346 | 249. 0973418 | 345. 761 | 642138. 5976 |
| M249T498 | 249. 1122825 | 498. 202 | 190350. 6238 |
| M249T470 | 249. 1335237 | 470. 253 | 556674. 3628 |
| M249T384 | 249. 135623  | 383. 727 | 2980411. 872 |
| M249T661 | 249. 1486967 | 661. 453 | 5337679. 34  |
| M249T766 | 249. 1487211 | 765. 588 | 1144342. 522 |
| M249T779 | 249. 1487575 | 779. 407 | 1295803. 453 |
| M249T735 | 249. 1487243 | 734. 901 | 4684910. 132 |
| M250T215 | 250. 0200935 | 215. 4   | 369747. 5585 |
| M250T364 | 250. 0190845 | 363. 928 | 2027219. 532 |
| M250T107 | 250. 0635995 | 106. 648 | 850934. 8527 |
| M250T329 | 250. 0718203 | 328. 999 | 2001294. 88  |
| M250T346 | 250. 0717236 | 345. 761 | 2479727. 247 |
| M250T410 | 250. 0683913 | 409. 881 | 2082842. 084 |
| M250T453 | 250. 0718857 | 453. 126 | 1484501. 77  |
| M250T367 | 250. 0706816 | 367. 026 | 2776604. 229 |
| M250T293 | 250. 0682733 | 292. 621 | 2692719. 118 |
| M250T197 | 250. 0706538 | 197. 335 | 2256621. 165 |
| M250T234 | 250. 0715705 | 233. 519 | 1174442. 69  |
| M250T188 | 250. 0707151 | 188. 174 | 1617549. 743 |
| M250T487 | 250. 0717466 | 487. 329 | 3708416. 15  |
| M250T394 | 250. 0720564 | 394. 467 | 2855495. 795 |
| M250T418 | 250. 071743  | 417. 689 | 2442602. 431 |
| M250T370 | 250. 091499  | 370. 115 | 1166184. 315 |

|            |              |          |              |
|------------|--------------|----------|--------------|
| M250T91    | 250. 092276  | 90. 9026 | 172160856. 8 |
| M250T33    | 250. 1438624 | 32. 8715 | 254883. 7699 |
| M251T615   | 250. 9873077 | 615. 38  | 975315. 4273 |
| M251T455   | 251. 0552109 | 454. 645 | 16285603. 91 |
| M251T472   | 251. 0553118 | 471. 768 | 3389967. 321 |
| M251T369   | 251. 0551075 | 368. 559 | 6024381. 865 |
| M251T427   | 251. 0553061 | 426. 913 | 25233408. 74 |
| M251T401   | 251. 0552966 | 400. 641 | 4792952. 053 |
| M251T358   | 251. 0553004 | 357. 746 | 4610685. 473 |
| M251T418   | 251. 0552987 | 417. 689 | 9236152. 855 |
| M251T334   | 251. 0664545 | 333. 655 | 366067. 3753 |
| M251T147   | 251. 0761115 | 147. 455 | 9692341. 312 |
| M251T122   | 251. 0761075 | 122. 381 | 12705829. 99 |
| M251T107   | 251. 0759579 | 106. 648 | 20078040. 37 |
| M251T98    | 251. 0760695 | 97. 682  | 29296877     |
| M251T206   | 251. 0760601 | 206. 399 | 10563649. 95 |
| M251T90    | 251. 0760538 | 89. 8937 | 15554015. 92 |
| M251T303   | 251. 0762055 | 303. 259 | 2387993. 571 |
| M251T473   | 251. 0911516 | 473. 329 | 415218. 9713 |
| M251T91    | 251. 0948997 | 90. 9026 | 16238601. 46 |
| M251T326   | 251. 1033771 | 325. 901 | 2473234. 564 |
| M251T294   | 251. 1047486 | 294. 152 | 1876554. 943 |
| M251T130   | 251. 1147816 | 129. 827 | 5983360. 201 |
| M251T622   | 251. 1279812 | 621. 547 | 861808. 9404 |
| M251T609   | 251. 1279575 | 609. 19  | 1041569. 757 |
| M251T769   | 251. 163864  | 768. 696 | 2067356. 825 |
| M251T789   | 251. 1638364 | 788. 604 | 1199191. 96  |
| M251T744   | 251. 1646305 | 744. 192 | 1026927. 27  |
| M251T687   | 251. 164761  | 687. 214 | 649900. 8391 |
| M251T715   | 251. 1638571 | 714. 841 | 1869280. 369 |
| M251T701   | 251. 1638804 | 701. 149 | 1480820. 718 |
| M252T163   | 252. 0495895 | 162. 615 | 3706545. 475 |
| M252T290   | 252. 0496921 | 289. 534 | 3473305. 728 |
| M252T326   | 252. 0504416 | 325. 901 | 1415152. 429 |
| M252T237   | 252. 0505278 | 236. 518 | 465176. 2887 |
| M252T362   | 252. 0521123 | 362. 384 | 4223465. 63  |
| M252T427   | 252. 0580583 | 426. 913 | 3057962. 75  |
| M252T418   | 252. 0581103 | 417. 689 | 1132611. 772 |
| M252T355_1 | 252. 0876131 | 354. 719 | 2645236. 397 |
| M252T249   | 252. 0865473 | 248. 622 | 1466371. 03  |
| M252T390   | 252. 0865912 | 389. 839 | 3887737. 272 |
| M252T327   | 252. 0865482 | 327. 449 | 4919458. 554 |
| M252T315   | 252. 087393  | 315. 162 | 2111833. 019 |
| M252T449   | 252. 0875387 | 448. 527 | 2176528. 556 |
| M252T399   | 252. 0865711 | 399. 086 | 2647562. 69  |
| M252T365   | 252. 087464  | 365. 475 | 3022823. 637 |
| M252T376   | 252. 0866013 | 376. 15  | 4270365. 172 |
| M252T294   | 252. 0874087 | 294. 152 | 1385461. 958 |
| M252T200   | 252. 0867288 | 200. 362 | 4150234. 14  |
| M252T343   | 252. 0873569 | 342. 819 | 2449707. 488 |
| M252T205   | 252. 0978877 | 204. 895 | 4842931. 294 |
| M252T335   | 252. 097885  | 335. 153 | 2573473. 224 |
| M252T355_2 | 252. 09819   | 354. 719 | 707168. 9489 |
| M252T312   | 252. 0979516 | 312. 058 | 1822402. 774 |

|            |              |          |              |
|------------|--------------|----------|--------------|
| M252T773   | 252. 1090261 | 773. 333 | 1030288. 197 |
| M252T131   | 252. 1173347 | 131. 207 | 413207. 6404 |
| M252T337   | 252. 1435887 | 336. 681 | 18134810. 58 |
| M253T615_1 | 252. 9841728 | 615. 38  | 533509. 9952 |
| M253T214   | 253. 0344778 | 213. 897 | 2975935. 808 |
| M253T224   | 253. 0459315 | 224. 484 | 1488077. 668 |
| M253T290   | 253. 0545151 | 289. 534 | 564311. 3512 |
| M253T106   | 253. 0554296 | 105. 537 | 21579358. 8  |
| M253T362   | 253. 0553535 | 362. 384 | 739759. 2211 |
| M253T95    | 253. 0551239 | 95. 2383 | 6295673. 158 |
| M253T503   | 253. 0563888 | 502. 873 | 604723. 5183 |
| M253T456   | 253. 0704733 | 456. 2   | 6439177. 826 |
| M253T515   | 253. 0700459 | 515. 338 | 774924. 1469 |
| M253T438   | 253. 0707137 | 437. 734 | 4167253. 734 |
| M253T425   | 253. 0702976 | 425. 439 | 10280669. 42 |
| M253T475   | 253. 0704022 | 474. 888 | 4743366. 517 |
| M253T489   | 253. 0705455 | 488. 885 | 1769474. 634 |
| M253T408   | 253. 0716098 | 408. 368 | 4251901. 994 |
| M253T394   | 253. 0703757 | 394. 467 | 1962024. 96  |
| M253T184   | 253. 0822413 | 183. 708 | 5760471. 537 |
| M253T726   | 253. 0845187 | 725. 713 | 2609041. 554 |
| M253T277   | 253. 089461  | 277. 135 | 1517880. 886 |
| M253T271   | 253. 0890973 | 270. 88  | 1524184. 146 |
| M253T266   | 253. 0893408 | 265. 541 | 1235258. 427 |
| M253T245   | 253. 0894635 | 245. 353 | 3212712. 45  |
| M253T221   | 253. 0896167 | 221. 453 | 10584034. 1  |
| M253T205   | 253. 0909361 | 204. 895 | 64280393. 78 |
| M253T234   | 253. 0893875 | 233. 519 | 5085263. 002 |
| M253T658   | 253. 0913085 | 658. 372 | 2150134. 604 |
| M253T257   | 253. 089402  | 257. 001 | 2171468. 904 |
| M253T286   | 253. 0895    | 286. 433 | 3395171. 97  |
| M253T104   | 253. 0918191 | 104. 493 | 10130648. 79 |
| M253T303   | 253. 0896753 | 303. 259 | 2066616. 465 |
| M253T449   | 253. 1072206 | 448. 527 | 1046147. 066 |
| M253T402   | 253. 1070166 | 402. 144 | 976231. 4937 |
| M253T370   | 253. 1168078 | 370. 115 | 6135416. 767 |
| M253T382   | 253. 1174873 | 382. 171 | 691813. 8482 |
| M253T288   | 253. 1183664 | 287. 981 | 828142. 4646 |
| M253T193   | 253. 1299599 | 192. 769 | 1515094. 286 |
| M253T601   | 253. 1433156 | 601. 473 | 1182964. 696 |
| M253T580   | 253. 143012  | 579. 883 | 2046019. 485 |
| M253T522   | 253. 1433988 | 521. 5   | 906233. 6313 |
| M253T557   | 253. 1432927 | 557. 078 | 1865681. 553 |
| M253T615_2 | 253. 1431488 | 615. 38  | 2222225. 701 |
| M253T569   | 253. 143401  | 569. 091 | 957613. 4412 |
| M253T629   | 253. 1432993 | 629. 272 | 1999561. 556 |
| M253T640   | 253. 143294  | 640. 057 | 968692. 6104 |
| M253T750   | 253. 1805054 | 750. 298 | 728191. 1351 |
| M254T312   | 254. 0117366 | 312. 058 | 1958669. 445 |
| M254T182   | 254. 0455025 | 182. 156 | 1151772. 481 |
| M254T124   | 254. 0510345 | 123. 792 | 2443457. 954 |
| M254T115   | 254. 0510538 | 115. 123 | 2025159. 551 |
| M254T106   | 254. 0628717 | 105. 537 | 10390726. 27 |
| M254T145   | 254. 0655829 | 144. 706 | 5032699. 95  |

|            |              |          |              |
|------------|--------------|----------|--------------|
| M254T234   | 254. 0655071 | 233. 519 | 3327182. 132 |
| M254T172   | 254. 0675529 | 171. 546 | 12080155. 64 |
| M254T263   | 254. 0664785 | 263. 129 | 5958443. 472 |
| M254T155   | 254. 0656228 | 155. 033 | 6532386. 403 |
| M254T134   | 254. 0656314 | 134. 253 | 5012981. 345 |
| M254T296   | 254. 0655474 | 295. 704 | 3765809. 491 |
| M254T334   | 254. 0664422 | 333. 655 | 11932194. 93 |
| M254T199   | 254. 0665188 | 198. 821 | 11007113. 84 |
| M254T456   | 254. 0706973 | 456. 2   | 389108. 3859 |
| M254T425   | 254. 0741204 | 425. 439 | 1356293. 226 |
| M254T184   | 254. 0852033 | 183. 708 | 395555. 647  |
| M254T214   | 254. 0794424 | 213. 897 | 950963. 5615 |
| M254T208   | 254. 1029722 | 207. 935 | 31126789. 09 |
| M254T361   | 254. 1025945 | 360. 831 | 1476978. 308 |
| M254T220   | 254. 1029844 | 219. 979 | 16598838. 14 |
| M254T331   | 254. 113475  | 330. 552 | 6477093. 951 |
| M254T344   | 254. 1134585 | 344. 233 | 6236414. 755 |
| M254T318   | 254. 1135263 | 318. 232 | 8482985. 268 |
| M254T358   | 254. 1135118 | 357. 746 | 9116480. 806 |
| M255T72    | 254. 9817619 | 72. 0941 | 4686427. 747 |
| M255T188   | 255. 0497593 | 188. 174 | 17000368. 59 |
| M255T347   | 255. 0497093 | 347. 166 | 3334504. 328 |
| M255T104   | 255. 0494756 | 104. 493 | 5159490. 892 |
| M255T323   | 255. 0461982 | 322. 862 | 6348313. 547 |
| M255T199   | 255. 0679805 | 198. 821 | 1807917. 531 |
| M255T645   | 255. 0710398 | 644. 722 | 178303823. 6 |
| M255T703   | 255. 0700408 | 702. 622 | 44863438. 92 |
| M255T723   | 255. 0700184 | 722. 604 | 30478493. 86 |
| M255T559   | 255. 0743888 | 558. 574 | 75108347. 94 |
| M255T744   | 255. 0743605 | 744. 192 | 9854150. 15  |
| M255T535   | 255. 0719441 | 535. 488 | 20223006. 6  |
| M255T669   | 255. 0700566 | 669. 12  | 100619312. 6 |
| M255T520   | 255. 0719889 | 519. 998 | 26839768. 1  |
| M255T107   | 255. 0710183 | 106. 648 | 17092266. 19 |
| M255T823   | 255. 0687048 | 823. 375 | 18040808. 49 |
| M255T93    | 255. 0708989 | 92. 9618 | 31310658. 78 |
| M255T614   | 255. 0729548 | 613. 824 | 258173904. 2 |
| M255T779   | 255. 0710218 | 779. 407 | 78282183. 27 |
| M255T334   | 255. 0702062 | 333. 655 | 2076243. 678 |
| M255T835_1 | 255. 0719957 | 835. 329 | 18858615. 63 |
| M255T229   | 255. 0871101 | 228. 961 | 144471. 6226 |
| M255T326_1 | 255. 0864037 | 325. 901 | 799234. 0472 |
| M255T382   | 255. 0856691 | 382. 171 | 1409700. 533 |
| M255T452   | 255. 0888485 | 451. 616 | 488377. 2516 |
| M255T378   | 255. 097985  | 377. 64  | 905399. 5566 |
| M255T402   | 255. 0979138 | 402. 144 | 1409462. 378 |
| M255T418   | 255. 0980238 | 417. 689 | 762931. 521  |
| M255T326_2 | 255. 0980643 | 325. 901 | 1942358. 757 |
| M255T208   | 255. 1059207 | 207. 935 | 4064006. 308 |
| M255T169   | 255. 1080579 | 168. 507 | 2051731. 246 |
| M255T220   | 255. 1057685 | 219. 979 | 1447143. 273 |
| M255T344   | 255. 1171529 | 344. 233 | 517022. 6804 |
| M255T455   | 255. 1230625 | 454. 645 | 1255843. 265 |
| M255T413   | 255. 123079  | 413. 006 | 1353140. 848 |



|            |              |          |              |
|------------|--------------|----------|--------------|
| M255T432   | 255. 1231614 | 431. 507 | 1517800. 509 |
| M255T532_1 | 255. 1231553 | 532. 372 | 942128. 2808 |
| M255T545   | 255. 1589453 | 544. 759 | 1193177. 802 |
| M255T595   | 255. 1598721 | 595. 35  | 838203. 4886 |
| M255T642   | 255. 1604344 | 641. 603 | 855414. 334  |
| M255T626   | 255. 1598406 | 626. 183 | 759961. 2388 |
| M255T586   | 255. 1598934 | 586. 044 | 718125. 0612 |
| M255T532_2 | 255. 1591999 | 532. 372 | 810967. 7117 |
| M255T829   | 255. 1956638 | 829. 321 | 1368069. 731 |
| M255T798   | 255. 1955904 | 797. 757 | 2234563. 537 |
| M255T31    | 255. 2307082 | 31. 4228 | 1122483. 88  |
| M255T835_2 | 255. 2324109 | 835. 329 | 1948017. 492 |
| M256T661   | 255. 8206038 | 661. 453 | 1016332. 494 |
| M256T724   | 255. 8213394 | 724. 158 | 1370982. 046 |
| M256T125   | 256. 030393  | 125. 274 | 1041605. 311 |
| M256T136   | 256. 0451268 | 135. 795 | 2541157. 293 |
| M256T170   | 256. 0455171 | 170. 049 | 1668510. 362 |
| M256T188   | 256. 0532246 | 188. 174 | 1736925. 779 |
| M256T723   | 256. 0700116 | 722. 604 | 3058183. 091 |
| M256T831   | 256. 0702327 | 830. 813 | 894108. 2645 |
| M256T669   | 256. 0702887 | 669. 12  | 6789487. 433 |
| M256T605   | 256. 0706435 | 604. 606 | 4549939. 598 |
| M256T736   | 256. 0700657 | 736. 458 | 1152954. 259 |
| M256T822   | 256. 0702866 | 821. 831 | 860999. 3085 |
| M256T752   | 256. 0702673 | 751. 766 | 1029832. 385 |
| M256T629   | 256. 0698542 | 629. 272 | 10420991. 64 |
| M256T249   | 256. 0799552 | 249. 466 | 398645. 7028 |
| M256T270   | 256. 0801052 | 269. 798 | 223045. 3878 |
| M256T255   | 256. 0799708 | 255. 113 | 420072. 3336 |
| M256T264   | 256. 0800008 | 263. 845 | 155369. 5032 |
| M256T808   | 256. 0746226 | 808. 251 | 517130. 1249 |
| M256T276   | 256. 0800189 | 276. 104 | 267948. 0344 |
| M256T789   | 256. 0745845 | 788. 604 | 582893. 2758 |
| M256T223   | 256. 0803698 | 222. 943 | 4655461. 122 |
| M256T478   | 256. 0738988 | 477. 982 | 163798. 0863 |
| M256T546   | 256. 0737271 | 546. 308 | 7866866. 447 |
| M256T592   | 256. 0746272 | 592. 284 | 2072224. 896 |
| M256T652   | 256. 0746403 | 652. 285 | 5222580. 627 |
| M256T241   | 256. 0799629 | 240. 733 | 605280. 2613 |
| M256T799   | 256. 0745602 | 799. 306 | 877148. 1349 |
| M256T700   | 256. 0746123 | 699. 592 | 1885910. 482 |
| M256T764   | 256. 0746239 | 764. 034 | 472345. 9163 |
| M256T584   | 256. 0746397 | 584. 484 | 2598309. 805 |
| M256T490   | 256. 0739989 | 490. 434 | 369948. 1749 |
| M256T303   | 256. 0801969 | 303. 259 | 1481627. 367 |
| M256T773   | 256. 0746401 | 773. 333 | 1179875. 289 |
| M256T390_1 | 256. 0813052 | 389. 839 | 2945859. 711 |
| M256T106   | 256. 0819453 | 105. 537 | 3600061. 671 |
| M256T293   | 256. 0815052 | 292. 621 | 3313640. 953 |
| M256T202   | 256. 0814322 | 201. 897 | 25233518. 27 |
| M256T326   | 256. 0814402 | 325. 901 | 7446348. 436 |
| M256T172   | 256. 0815223 | 171. 546 | 2473724. 806 |
| M256T365   | 256. 0810795 | 365. 475 | 2475414. 463 |
| M256T146   | 256. 082382  | 146. 08  | 2410625. 684 |

|            |              |          |              |
|------------|--------------|----------|--------------|
| M256T181   | 256. 0930514 | 180. 601 | 2131913. 82  |
| M256T282   | 256. 0930942 | 281. 942 | 700860. 19   |
| M256T542   | 256. 0968972 | 541. 673 | 849042. 0791 |
| M256T390_2 | 256. 1184128 | 389. 839 | 2435517. 815 |
| M256T31    | 256. 2344476 | 31. 4228 | 147860. 3801 |
| M257T172   | 257. 0422326 | 171. 546 | 5521625. 847 |
| M257T149   | 257. 0421914 | 148. 981 | 2459509. 336 |
| M257T118   | 257. 0421701 | 117. 954 | 2918679. 318 |
| M257T466   | 257. 0557312 | 465. 575 | 616609. 2876 |
| M257T227   | 257. 0653703 | 227. 421 | 2905108. 083 |
| M257T182   | 257. 0656095 | 182. 156 | 5997780. 518 |
| M257T327   | 257. 0648582 | 327. 449 | 2198465. 357 |
| M257T557   | 257. 06868   | 557. 078 | 1738987. 552 |
| M257T723   | 257. 0686047 | 722. 604 | 2593647. 417 |
| M257T706   | 257. 0686013 | 705. 593 | 676950. 0184 |
| M257T669   | 257. 0686841 | 669. 12  | 6576518. 91  |
| M257T293   | 257. 0655584 | 292. 621 | 4416186. 584 |
| M257T598   | 257. 0686636 | 598. 341 | 8275307. 845 |
| M257T568   | 257. 0686069 | 567. 543 | 2434809. 224 |
| M257T268   | 257. 0653885 | 268. 419 | 5338806. 101 |
| M257T756   | 257. 0686025 | 756. 343 | 1880936. 65  |
| M257T697   | 257. 0685543 | 697. 061 | 876709. 2207 |
| M257T778   | 257. 0686617 | 777. 92  | 909744. 725  |
| M257T425   | 257. 0678038 | 425. 439 | 901369. 4323 |
| M257T652   | 257. 0686502 | 652. 285 | 6017396. 124 |
| M257T90    | 257. 0647016 | 89. 8937 | 64796746. 15 |
| M257T352   | 257. 0649097 | 351. 663 | 1757452. 665 |
| M257T629   | 257. 0687162 | 629. 272 | 14178305. 25 |
| M257T146   | 257. 0656411 | 146. 08  | 2366872. 956 |
| M257T334   | 257. 07689   | 333. 655 | 3645066. 893 |
| M257T834   | 257. 0716808 | 833. 866 | 2229903. 798 |
| M257T798   | 257. 071876  | 797. 757 | 1282569. 743 |
| M257T203   | 257. 0843971 | 203. 346 | 2781233. 531 |
| M257T715   | 257. 0824172 | 714. 841 | 1989039. 585 |
| M257T408   | 257. 1022824 | 408. 368 | 2191422. 526 |
| M257T335   | 257. 113533  | 335. 153 | 24190465. 75 |
| M257T199   | 257. 1241869 | 198. 821 | 6239632. 901 |
| M257T455   | 257. 1389922 | 454. 645 | 1410688. 697 |
| M257T411   | 257. 1390473 | 411. 444 | 769041. 9845 |
| M257T446   | 257. 1390101 | 445. 522 | 951818. 0688 |
| M257T503   | 257. 138973  | 502. 873 | 543886. 1661 |
| M257T413   | 257. 1496743 | 413. 006 | 529172. 2016 |
| M257T361   | 257. 1595446 | 360. 831 | 5518828. 371 |
| M257T605   | 257. 1747383 | 604. 606 | 1596905. 959 |
| M257T626   | 257. 1750468 | 626. 183 | 1637689. 628 |
| M257T586   | 257. 1751243 | 586. 044 | 1853890. 115 |
| M257T678   | 257. 1750014 | 678. 416 | 1919772. 819 |
| M258T661   | 257. 8183007 | 661. 453 | 1035504. 54  |
| M258T713   | 257. 8178118 | 713. 292 | 1223721. 194 |
| M258T376   | 257. 977559  | 376. 15  | 1031005. 253 |
| M258T130   | 258. 0294571 | 129. 827 | 1522768. 144 |
| M258T286   | 258. 0245646 | 286. 433 | 282448. 4954 |
| M258T117   | 258. 0457155 | 116. 52  | 5436209. 598 |
| M258T172_1 | 258. 0457053 | 171. 546 | 1541136. 937 |

|            |              |           |              |
|------------|--------------|-----------|--------------|
| M258T151   | 258. 0457727 | 150. 528  | 1583484. 622 |
| M258T84    | 258. 0604602 | 83. 9405  | 19483433. 58 |
| M258T411   | 258. 0722119 | 411. 444  | 642030. 0598 |
| M258T268   | 258. 0699039 | 267. 702  | 538296. 0827 |
| M258T89    | 258. 070918  | 88. 8247  | 2733318. 88  |
| M258T327   | 258. 0967987 | 327. 449  | 5967511. 863 |
| M258T106   | 258. 0973134 | 105. 537  | 5631408. 204 |
| M258T353   | 258. 0966606 | 353. 163  | 2593627. 706 |
| M258T205   | 258. 0979205 | 204. 895  | 4067267. 612 |
| M258T188   | 258. 0978623 | 188. 174  | 15680585. 19 |
| M258T172_2 | 258. 0973572 | 171. 546  | 3607075. 99  |
| M258T215   | 258. 097838  | 215. 4    | 2446091. 218 |
| M258T146   | 258. 0968287 | 146. 08   | 1980985. 331 |
| M258T407   | 258. 0965742 | 406. 813  | 1441455. 62  |
| M258T296   | 258. 0973134 | 295. 704  | 2539274. 262 |
| M258T161   | 258. 0980981 | 161. 184  | 2689965. 245 |
| M258T335   | 258. 1178237 | 335. 153  | 2414605. 151 |
| M258T187   | 258. 1444784 | 186. 689  | 2509129. 31  |
| M258T184   | 258. 1814473 | 183. 708  | 2838573. 455 |
| M258T199   | 258. 1813483 | 198. 821  | 916768. 2175 |
| M259T87    | 258. 9162007 | 87. 426   | 3767849. 132 |
| M259T540   | 258. 9562269 | 540. 152  | 569869. 7401 |
| M259T376   | 258. 9701301 | 376. 15   | 395415. 3979 |
| M259T33    | 258. 9798391 | 32. 8715  | 398881. 5516 |
| M259T75    | 258. 992697  | 74. 6705  | 24579175. 56 |
| M259T79    | 259. 0205537 | 79. 4105  | 69098632. 45 |
| M259T172   | 259. 0401509 | 171. 546  | 1724664. 178 |
| M259T220   | 259. 0452564 | 219. 979  | 2044513. 499 |
| M259T155   | 259. 0579507 | 155. 033  | 878929. 2699 |
| M259T525   | 259. 0606528 | 524. 56   | 2413289. 18  |
| M259T382   | 259. 0702497 | 382. 171  | 5137285. 027 |
| M259T317_1 | 259. 0769027 | 316. 709  | 2374247. 843 |
| M259T401_1 | 259. 0788366 | 400. 641  | 867489. 4386 |
| M259T362   | 259. 076996  | 362. 384  | 4605238. 842 |
| M259T291_1 | 259. 0816163 | 291. 076  | 2021199. 865 |
| M259T303   | 259. 0809355 | 303. 259  | 1652620. 526 |
| M259T270   | 259. 0914099 | 269. 798  | 3908022. 077 |
| M259T223   | 259. 0926803 | 222. 943  | 1955149. 86  |
| M259T188   | 259. 1000722 | 188. 174  | 1360205. 883 |
| M259T419_1 | 259. 1080542 | 419. 237  | 422713. 4606 |
| M259T291_2 | 259. 1176664 | 291. 076  | 1645266. 006 |
| M259T317_2 | 259. 1175231 | 316. 709  | 1405543. 051 |
| M259T280   | 259. 1174062 | 280. 275  | 551190. 483  |
| M259T367   | 259. 1184023 | 367. 026  | 4097777. 278 |
| M259T401_2 | 259. 118467  | 400. 641  | 1397493. 561 |
| M259T352   | 259. 1184663 | 351. 663  | 3398093. 64  |
| M259T439   | 259. 1183375 | 439. 27   | 1971251. 494 |
| M259T106   | 259. 1291347 | 105. 537  | 5961038. 093 |
| M259T242   | 259. 1293345 | 242. 223  | 2287512. 749 |
| M259T605   | 259. 1540581 | 604. 606  | 480442. 8819 |
| M259T419_2 | 259. 1540226 | 419. 237  | 1024249. 399 |
| M259T727   | 259. 1647769 | 727. 22   | 559463. 8773 |
| M259T669   | 259. 1902545 | 669. 12   | 376751. 4057 |
| M260T49    | 259. 9330676 | 48. 53545 | 81623. 22654 |

|            |              |           |              |
|------------|--------------|-----------|--------------|
| M260T43    | 259. 9332468 | 42. 53875 | 221512. 0445 |
| M260T56    | 259. 9333282 | 56. 0747  | 163848. 091  |
| M260T63    | 259. 9331797 | 62. 7487  | 300897. 2023 |
| M260T609   | 259. 9328337 | 609. 19   | 370840. 584  |
| M260T34    | 259. 9332877 | 34. 4117  | 78238. 4411  |
| M260T79    | 260. 0408243 | 79. 4105  | 1403822. 042 |
| M260T362   | 260. 0742939 | 362. 384  | 756129. 3    |
| M260T92    | 260. 076485  | 91. 9113  | 8030812. 29  |
| M260T490   | 260. 092394  | 490. 434  | 3290460. 456 |
| M260T290   | 260. 1123908 | 289. 534  | 2985019. 707 |
| M260T375   | 260. 1118378 | 374. 746  | 2868178. 387 |
| M260T335   | 260. 1127041 | 335. 153  | 2217794. 068 |
| M260T106   | 260. 1128167 | 105. 537  | 1336443. 025 |
| M260T191   | 260. 1123774 | 191. 259  | 2018352. 219 |
| M261T542   | 260. 9532793 | 541. 673  | 311958. 9255 |
| M261T413   | 261. 0397477 | 413. 006  | 697011. 411  |
| M261T291   | 261. 0596866 | 291. 076  | 1756368. 588 |
| M261T257   | 261. 0603444 | 257. 001  | 224283. 8107 |
| M261T106   | 261. 0608482 | 105. 537  | 3926140. 745 |
| M261T79    | 261. 0713479 | 79. 4105  | 4518782. 426 |
| M261T229   | 261. 0718386 | 228. 961  | 1704185. 027 |
| M261T211   | 261. 0718558 | 210. 883  | 740865. 3089 |
| M261T449   | 261. 0763216 | 448. 527  | 499492. 0316 |
| M261T469   | 261. 0761615 | 468. 69   | 632931. 0134 |
| M261T341   | 261. 0863512 | 341. 266  | 8226871. 607 |
| M261T378   | 261. 0864692 | 377. 64   | 1476734. 611 |
| M261T240   | 261. 0830367 | 239. 574  | 1050938. 125 |
| M261T428   | 261. 0872443 | 428. 448  | 973395. 2597 |
| M261T415   | 261. 0968298 | 414. 571  | 457953. 9713 |
| M261T425_1 | 261. 0978268 | 425. 439  | 538403. 0353 |
| M261T425_2 | 261. 1233521 | 425. 439  | 1603586. 612 |
| M261T382   | 261. 1266276 | 382. 171  | 1432217. 502 |
| M261T353   | 261. 133329  | 353. 163  | 3699322. 116 |
| M261T33    | 261. 1338428 | 32. 8715  | 106675. 7447 |
| M261T444   | 261. 1326551 | 443. 961  | 16864085. 64 |
| M261T808   | 261. 1489481 | 808. 251  | 11251572. 95 |
| M262T73    | 261. 9413086 | 73. 3444  | 2453372. 374 |
| M262T381   | 262. 020954  | 380. 608  | 127223. 0996 |
| M262T84    | 262. 0558179 | 83. 9405  | 147641915. 5 |
| M262T373   | 262. 0702058 | 373. 196  | 1594339. 231 |
| M262T407   | 262. 0719443 | 406. 813  | 899949. 0585 |
| M262T95    | 262. 068105  | 95. 2383  | 22744862. 37 |
| M262T418   | 262. 0719875 | 417. 689  | 1324634. 282 |
| M262T179   | 262. 0820129 | 179. 046  | 9744062. 679 |
| M262T331   | 262. 092402  | 330. 552  | 612672. 3103 |
| M262T106   | 262. 0921063 | 105. 537  | 14326637. 28 |
| M262T341   | 262. 0912983 | 341. 266  | 1429185. 897 |
| M262T92    | 262. 0920959 | 91. 9113  | 45771386. 3  |
| M262T146   | 262. 0921037 | 146. 08   | 3464888. 861 |
| M262T501   | 262. 1076017 | 501. 318  | 1216510. 039 |
| M262T537   | 262. 1184411 | 537. 051  | 1816196. 253 |
| M262T262   | 262. 128987  | 262. 302  | 997814. 0472 |
| M262T404   | 262. 1292377 | 403. 698  | 660182. 5426 |
| M262T279   | 262. 1291656 | 278. 627  | 1348737. 94  |

|            |              |           |              |
|------------|--------------|-----------|--------------|
| M262T294   | 262. 1283031 | 294. 152  | 4086042. 403 |
| M263T273   | 262. 9533768 | 273. 232  | 106511. 5932 |
| M263T73    | 263. 0404177 | 73. 3444  | 16901654. 66 |
| M263T327   | 263. 0501885 | 327. 449  | 22953546. 59 |
| M263T453   | 263. 0547911 | 453. 126  | 937419. 7994 |
| M263T146   | 263. 0757829 | 146. 08   | 6712180. 526 |
| M263T95    | 263. 075861  | 95. 2383  | 163846343. 6 |
| M263T721   | 263. 0828718 | 721. 058  | 17560903. 12 |
| M263T424_1 | 263. 0814947 | 423. 877  | 116005. 2987 |
| M263T179   | 263. 0863956 | 179. 046  | 941997. 6378 |
| M263T442   | 263. 0966404 | 442. 399  | 2538302. 337 |
| M263T424_2 | 263. 1030943 | 423. 877  | 1499086. 303 |
| M263T447   | 263. 1133301 | 446. 967  | 2928885. 184 |
| M263T407   | 263. 1154553 | 406. 813  | 4140625. 174 |
| M263T643   | 263. 1279961 | 643. 166  | 688554. 3088 |
| M263T494   | 263. 1284137 | 493. 56   | 6235602. 062 |
| M263T736   | 263. 1284453 | 736. 458  | 1553377. 742 |
| M263T401   | 263. 1385248 | 400. 641  | 6147726. 937 |
| M263T554   | 263. 1491413 | 554. 027  | 360616. 2023 |
| M264T391   | 264. 050861  | 391. 341  | 536728. 045  |
| M264T361   | 264. 0501108 | 360. 831  | 1377294. 43  |
| M264T327   | 264. 0566948 | 327. 449  | 2329178. 105 |
| M264T267   | 264. 0716131 | 266. 709  | 216126. 3265 |
| M264T95    | 264. 0797859 | 95. 2383  | 14403597. 87 |
| M264T480   | 264. 0873724 | 479. 541  | 1204868. 235 |
| M264T314   | 264. 0865245 | 313. 612  | 1504538. 736 |
| M264T404   | 264. 0873723 | 403. 698  | 1386822. 001 |
| M264T376   | 264. 0966342 | 376. 15   | 5183875. 766 |
| M264T358   | 264. 0985741 | 357. 746  | 1138183. 264 |
| M264T364   | 264. 0985559 | 363. 928  | 1850209. 866 |
| M264T92    | 264. 1067767 | 91. 9113  | 179324582    |
| M264T500   | 264. 1226642 | 499. 759  | 1387349. 289 |
| M264T401   | 264. 1423478 | 400. 641  | 857275. 0412 |
| M264T331   | 264. 1459129 | 330. 552  | 6736681. 63  |
| M265T87    | 264. 934067  | 87. 426   | 8677447. 807 |
| M265T369   | 265. 0352525 | 368. 559  | 993164. 4113 |
| M265T356   | 265. 0351949 | 356. 274  | 1558649. 79  |
| M265T442   | 265. 0341305 | 442. 399  | 508666. 8645 |
| M265T290   | 265. 0392899 | 289. 534  | 600403. 7197 |
| M265T81    | 265. 0557364 | 80. 6174  | 125863765. 6 |
| M265T107   | 265. 055747  | 106. 648  | 5713045. 44  |
| M265T294   | 265. 0551213 | 294. 152  | 3123206. 558 |
| M265T152   | 265. 0547098 | 152. 08   | 5161644. 035 |
| M265T220   | 265. 055076  | 219. 979  | 1923747. 897 |
| M265T170   | 265. 0563295 | 170. 049  | 3016842. 532 |
| M265T283   | 265. 0668255 | 282. 659  | 854712. 535  |
| M265T518   | 265. 0727899 | 518. 474  | 391102. 9955 |
| M265T452   | 265. 0719094 | 451. 616  | 1210501. 189 |
| M265T172   | 265. 081878  | 171. 546  | 1554643. 835 |
| M265T365   | 265. 0823888 | 365. 475  | 1122402. 817 |
| M265T764   | 265. 0868429 | 764. 034  | 544410. 2124 |
| M265T48    | 265. 0916078 | 47. 84945 | 141493. 0183 |
| M265T106   | 265. 0928    | 105. 537  | 4278618. 825 |
| M265T63    | 265. 0916135 | 63. 4462  | 1008819. 102 |

|            |              |          |              |
|------------|--------------|----------|--------------|
| M265T34    | 265. 0915993 | 34. 4117 | 706989. 3871 |
| M265T514   | 265. 1072574 | 513. 768 | 551975. 4243 |
| M265T92    | 265. 1106518 | 91. 9113 | 16963334. 84 |
| M265T324   | 265. 1177787 | 324. 413 | 1645699. 602 |
| M265T450   | 265. 1186574 | 450. 052 | 225840. 5376 |
| M265T355   | 265. 1289218 | 354. 719 | 5131394. 98  |
| M265T373   | 265. 1289337 | 373. 196 | 6254453. 261 |
| M265T625   | 265. 1444175 | 624. 642 | 2615432. 094 |
| M265T635   | 265. 1426991 | 635. 37  | 1421195. 484 |
| M265T500   | 265. 1438002 | 499. 759 | 2147473. 727 |
| M265T594   | 265. 142796  | 593. 841 | 2749370. 935 |
| M265T696   | 265. 1443794 | 695. 893 | 986494. 0533 |
| M265T773   | 265. 1459185 | 773. 333 | 9092764. 732 |
| M266T385   | 266. 01859   | 385. 225 | 1236352. 997 |
| M266T163   | 266. 0510374 | 162. 615 | 22257606. 14 |
| M266T119   | 266. 0510968 | 119. 413 | 10250946. 65 |
| M266T147   | 266. 0510876 | 147. 455 | 11357868. 26 |
| M266T272   | 266. 0510507 | 271. 596 | 737484. 9155 |
| M266T130   | 266. 051061  | 129. 827 | 9903572. 216 |
| M266T111   | 266. 0512021 | 110. 926 | 4307815. 952 |
| M266T82    | 266. 0581865 | 81. 8855 | 10953384. 14 |
| M266T433   | 266. 0663455 | 433. 06  | 1246818. 132 |
| M266T331   | 266. 066367  | 330. 552 | 1982253. 654 |
| M266T232   | 266. 0655779 | 231. 973 | 1572406. 585 |
| M266T314   | 266. 0665012 | 313. 612 | 739838. 791  |
| M266T294   | 266. 0663513 | 294. 152 | 2496928. 067 |
| M266T358   | 266. 0660919 | 357. 746 | 3704099. 893 |
| M266T191   | 266. 0665276 | 191. 259 | 2873190. 7   |
| M266T223   | 266. 0788245 | 222. 943 | 1674317. 844 |
| M266T89    | 266. 0870212 | 88. 8247 | 82896688. 32 |
| M266T378   | 266. 1024539 | 377. 64  | 1655951. 955 |
| M267T242   | 267. 0261248 | 242. 223 | 2999744. 521 |
| M267T220   | 267. 0261063 | 219. 979 | 1027783. 744 |
| M267T411   | 267. 0499003 | 411. 444 | 2608847. 138 |
| M267T121   | 267. 0459551 | 120. 945 | 11065069. 82 |
| M267T184   | 267. 0503748 | 183. 708 | 1029156. 993 |
| M267T373   | 267. 0499158 | 373. 196 | 3803849. 537 |
| M267T293   | 267. 0499609 | 292. 621 | 1774361. 476 |
| M267T317   | 267. 0499612 | 316. 709 | 3208455. 953 |
| M267T149_1 | 267. 046079  | 148. 981 | 5022572. 504 |
| M267T352   | 267. 0498663 | 351. 663 | 7943092. 439 |
| M267T111   | 267. 0455988 | 110. 926 | 2769404. 039 |
| M267T402   | 267. 0499021 | 402. 144 | 2157194. 612 |
| M267T738   | 267. 0678022 | 737. 955 | 10518248. 11 |
| M267T84    | 267. 0705932 | 83. 9405 | 80952677. 3  |
| M267T94    | 267. 0706334 | 94. 1615 | 342899431. 9 |
| M267T172   | 267. 0706015 | 171. 546 | 12264453. 08 |
| M267T305   | 267. 0737923 | 304. 743 | 14387474. 84 |
| M267T149_2 | 267. 0731598 | 148. 981 | 14574928. 35 |
| M267T515   | 267. 0861945 | 515. 338 | 30916172. 56 |
| M267T166   | 267. 0975557 | 165. 522 | 989518. 7292 |
| M267T349   | 267. 0954105 | 348. 668 | 2134583. 788 |
| M267T362   | 267. 0974636 | 362. 384 | 1170814. 744 |
| M267T331   | 267. 1078218 | 330. 552 | 17685672. 62 |

|            |              |          |              |
|------------|--------------|----------|--------------|
| M267T793   | 267. 1080642 | 793. 233 | 443034. 9836 |
| M267T344   | 267. 1078366 | 344. 233 | 3309540. 879 |
| M267T214   | 267. 1100701 | 213. 897 | 478033. 7797 |
| M267T261   | 267. 1083766 | 261. 138 | 598059. 9772 |
| M267T640   | 267. 1127061 | 640. 057 | 941871. 3919 |
| M267T415   | 267. 1234529 | 414. 571 | 1251617. 145 |
| M267T436   | 267. 1234754 | 436. 18  | 1220079. 854 |
| M267T569_1 | 267. 1242739 | 569. 091 | 2949781. 467 |
| M267T450   | 267. 1233068 | 450. 052 | 977882. 3782 |
| M267T365   | 267. 1360941 | 365. 475 | 497810. 819  |
| M267T297   | 267. 1453472 | 297. 149 | 1631851. 717 |
| M267T520   | 267. 1596807 | 519. 998 | 2156099. 953 |
| M267T540   | 267. 1596425 | 540. 152 | 1685824. 487 |
| M267T620   | 267. 1596047 | 619. 986 | 2466125. 581 |
| M267T504   | 267. 1596887 | 504. 432 | 1093800. 387 |
| M267T569_2 | 267. 1596417 | 569. 091 | 2069229. 004 |
| M267T549   | 267. 1595708 | 549. 371 | 1894811      |
| M267T829   | 267. 1953037 | 829. 321 | 4561493. 87  |
| M267T835   | 267. 2311042 | 835. 329 | 6281402. 722 |
| M268T249   | 268. 0305218 | 249. 466 | 939958. 6357 |
| M268T157   | 268. 0295772 | 156. 582 | 3421996. 66  |
| M268T206   | 268. 0294096 | 206. 399 | 1756459. 846 |
| M268T130   | 268. 0295176 | 129. 827 | 1480460. 032 |
| M268T231   | 268. 0303884 | 230. 507 | 1222450. 214 |
| M268T352   | 268. 0538657 | 351. 663 | 650236. 817  |
| M268T738   | 268. 0679113 | 737. 955 | 1577507. 218 |
| M268T421   | 268. 0783654 | 420. 799 | 2520474. 645 |
| M268T94    | 268. 0742891 | 94. 1615 | 25080249. 23 |
| M268T172   | 268. 0768831 | 171. 546 | 2283075. 39  |
| M268T305   | 268. 0775959 | 304. 743 | 2211189. 953 |
| M268T108   | 268. 0744274 | 108. 082 | 3060719. 32  |
| M268T293_1 | 268. 0814825 | 292. 621 | 3793625. 864 |
| M268T515   | 268. 0879385 | 515. 338 | 3665597. 041 |
| M268T388   | 268. 0810928 | 388. 326 | 6266832. 155 |
| M268T312   | 268. 0809337 | 312. 058 | 3203190. 606 |
| M268T338   | 268. 0824933 | 338. 222 | 4826187. 996 |
| M268T408   | 268. 0824688 | 408. 368 | 3791224. 824 |
| M268T146   | 268. 082445  | 146. 08  | 2855193. 582 |
| M268T359   | 268. 0825189 | 359. 297 | 7894734. 148 |
| M268T324   | 268. 0810266 | 324. 413 | 5266757. 467 |
| M268T439   | 268. 0811662 | 439. 27  | 1605551. 402 |
| M268T308   | 268. 0929887 | 307. 616 | 104111302. 9 |
| M268T331   | 268. 1121701 | 330. 552 | 1703789. 273 |
| M268T355   | 268. 1188632 | 354. 719 | 7045002. 904 |
| M268T293_2 | 268. 1180353 | 292. 621 | 556745. 6621 |
| M268T835   | 268. 2361186 | 835. 329 | 967647. 7153 |
| M269T82    | 268. 9831332 | 81. 8855 | 14333203. 31 |
| M269T69    | 268. 9929953 | 69. 1983 | 696655. 4497 |
| M269T571   | 269. 0222089 | 570. 599 | 888661. 8506 |
| M269T240   | 269. 024261  | 239. 574 | 820095. 0722 |
| M269T684   | 269. 0441902 | 684. 499 | 3507501. 561 |
| M269T335   | 269. 0655789 | 335. 153 | 7013342. 638 |
| M269T232   | 269. 0655876 | 231. 973 | 1308473. 319 |
| M269T410   | 269. 0655526 | 409. 881 | 4005142. 039 |

|            |              |          |              |
|------------|--------------|----------|--------------|
| M269T373   | 269. 0655627 | 373. 196 | 13005218. 03 |
| M269T393   | 269. 0656314 | 392. 905 | 5818521. 696 |
| M269T350   | 269. 0656061 | 350. 108 | 4773017. 461 |
| M269T294   | 269. 0656132 | 294. 152 | 4225285. 826 |
| M269T323   | 269. 0655711 | 322. 862 | 3580402. 433 |
| M269T312   | 269. 0657558 | 312. 058 | 3518278. 509 |
| M269T199   | 269. 0656564 | 198. 821 | 2549078. 681 |
| M269T203   | 269. 0851797 | 203. 346 | 6665328. 113 |
| M269T744   | 269. 0825458 | 744. 192 | 761501. 0809 |
| M269T293   | 269. 0775886 | 292. 621 | 730586. 725  |
| M269T680   | 269. 0834045 | 679. 873 | 1372229. 051 |
| M269T792   | 269. 0807574 | 791. 678 | 1284162. 418 |
| M269T134   | 269. 0852696 | 134. 253 | 5361208. 305 |
| M269T779   | 269. 0822386 | 779. 407 | 309236. 6808 |
| M269T154   | 269. 0852912 | 153. 601 | 8666674. 637 |
| M269T107   | 269. 0857151 | 106. 648 | 32657584. 13 |
| M269T90    | 269. 0890404 | 89. 8937 | 587538357. 6 |
| M269T308   | 269. 0971803 | 307. 616 | 11047017. 2  |
| M269T314   | 269. 1130176 | 313. 612 | 839490. 1495 |
| M269T299   | 269. 1132261 | 298. 619 | 1475640. 175 |
| M269T305   | 269. 1248098 | 304. 743 | 65872714. 25 |
| M269T161   | 269. 1245715 | 161. 184 | 1464213. 287 |
| M269T683   | 269. 1348094 | 682. 948 | 2679715. 593 |
| M269T522   | 269. 1390008 | 521. 5   | 3177862. 284 |
| M269T449   | 269. 1388276 | 448. 527 | 2648398. 562 |
| M269T562   | 269. 1389173 | 561. 624 | 2502577. 013 |
| M269T427   | 269. 1389658 | 426. 913 | 1077124. 389 |
| M269T614   | 269. 1384896 | 613. 824 | 1353811. 436 |
| M269T439   | 269. 1395242 | 439. 27  | 1643676. 523 |
| M269T789   | 269. 1539826 | 788. 604 | 1458154. 715 |
| M269T600   | 269. 1750276 | 599. 904 | 1900330. 105 |
| M269T740   | 269. 1750022 | 739. 509 | 270181. 3668 |
| M269T554   | 269. 1749976 | 554. 027 | 1230473. 641 |
| M269T31    | 269. 2109554 | 31. 4228 | 351015. 1097 |
| M269T811   | 269. 211171  | 811. 292 | 11802938. 63 |
| M269T835   | 269. 2111255 | 835. 329 | 1861138. 707 |
| M270T118   | 270. 044684  | 117. 954 | 17925218. 45 |
| M270T686   | 270. 0483216 | 686. 047 | 380565. 6266 |
| M270T108   | 270. 0456688 | 108. 082 | 12800074. 19 |
| M270T82    | 270. 0607756 | 81. 8855 | 2185164. 131 |
| M270T145   | 270. 060958  | 144. 706 | 1591741. 151 |
| M270T293   | 270. 0610263 | 292. 621 | 600448. 9867 |
| M270T175_1 | 270. 0612475 | 174. 576 | 2942235. 606 |
| M270T335   | 270. 0693634 | 335. 153 | 767952. 9208 |
| M270T394   | 270. 0689245 | 394. 467 | 558503. 5406 |
| M270T359   | 270. 0721639 | 359. 297 | 643169. 0009 |
| M270T90    | 270. 0892981 | 89. 8937 | 51731251. 69 |
| M270T353   | 270. 0972982 | 353. 163 | 3505047. 294 |
| M270T147   | 270. 0977173 | 147. 455 | 2012762. 726 |
| M270T370   | 270. 0972913 | 370. 115 | 5714771. 317 |
| M270T308   | 270. 0916619 | 307. 616 | 35966294. 28 |
| M270T294   | 270. 0973778 | 294. 152 | 2211516. 14  |
| M270T405   | 270. 0972901 | 405. 254 | 1040383. 232 |
| M270T290   | 270. 1087861 | 289. 534 | 1424301. 216 |



|            |              |          |              |
|------------|--------------|----------|--------------|
| M270T205   | 270. 1088191 | 204. 895 | 3585244. 321 |
| M270T300   | 270. 1086922 | 300. 176 | 1029699. 069 |
| M270T161   | 270. 1088782 | 161. 184 | 2180770. 358 |
| M270T175_2 | 270. 1088509 | 174. 576 | 4736441. 661 |
| M270T312   | 270. 1088356 | 312. 058 | 3318033. 205 |
| M270T305   | 270. 1228642 | 304. 743 | 1962801. 773 |
| M271T78    | 270. 9754274 | 78. 2661 | 14918719. 37 |
| M271T83    | 271. 0221797 | 82. 8986 | 49986328. 27 |
| M271T187   | 271. 0454544 | 186. 689 | 1556457. 828 |
| M271T117   | 271. 0496201 | 116. 52  | 798024. 0972 |
| M271T370   | 271. 0503726 | 370. 115 | 540214. 288  |
| M271T297   | 271. 045079  | 297. 149 | 3590239. 555 |
| M271T82    | 271. 0556495 | 81. 8855 | 4059309. 053 |
| M271T683   | 271. 060306  | 682. 948 | 13525198. 85 |
| M271T376   | 271. 0682241 | 376. 15  | 1471412. 995 |
| M271T145   | 271. 0819704 | 144. 706 | 1467369. 297 |
| M271T249   | 271. 0809937 | 248. 622 | 894158. 9721 |
| M271T369   | 271. 0809712 | 368. 559 | 4193326. 844 |
| M271T361   | 271. 0820095 | 360. 831 | 5018126. 998 |
| M271T344   | 271. 0821815 | 344. 233 | 3927480. 523 |
| M271T217   | 271. 0814481 | 216. 95  | 1023332. 639 |
| M271T173   | 271. 0819504 | 173. 092 | 1396248. 632 |
| M271T294   | 271. 0818977 | 294. 152 | 1362361. 086 |
| M271T418   | 271. 0808682 | 417. 689 | 1621765. 762 |
| M271T373   | 271. 0925253 | 373. 196 | 1966816. 081 |
| M271T396   | 271. 0940321 | 396. 023 | 543015. 1582 |
| M271T89    | 271. 0911596 | 88. 8247 | 5866177. 636 |
| M271T308   | 271. 0959525 | 307. 616 | 3562930. 201 |
| M271T729   | 271. 1180172 | 728. 711 | 3416590. 927 |
| M271T537   | 271. 1179622 | 537. 051 | 725922. 1029 |
| M271T411   | 271. 1179368 | 411. 444 | 2354293. 282 |
| M271T453   | 271. 1180911 | 453. 126 | 905627. 1378 |
| M271T227   | 271. 1401824 | 227. 421 | 5214400. 793 |
| M271T305   | 271. 1343989 | 304. 743 | 2613838. 029 |
| M271T548   | 271. 1447569 | 547. 805 | 334815. 0694 |
| M271T494   | 271. 1549847 | 493. 56  | 4121411. 051 |
| M271T432   | 271. 1756062 | 431. 507 | 1428667. 016 |
| M271T735   | 271. 1896214 | 734. 901 | 1544329. 342 |
| M271T46    | 271. 2262719 | 46. 1477 | 87944. 79975 |
| M271T54    | 271. 2262247 | 54. 2107 | 123072. 9589 |
| M271T60    | 271. 2261163 | 60. 4002 | 89044. 66368 |
| M271T66    | 271. 226459  | 66. 2043 | 88534. 27605 |
| M271T837   | 271. 2270658 | 836. 769 | 11800857. 6  |
| M271T31    | 271. 2263238 | 31. 4228 | 1069326. 039 |
| M271T778   | 271. 2278774 | 777. 92  | 4870379. 025 |
| M272T82    | 271. 9883756 | 81. 8855 | 9812775. 176 |
| M272T381   | 272. 040585  | 380. 608 | 2267730. 919 |
| M272T297   | 272. 0488598 | 297. 149 | 239840. 0104 |
| M272T268   | 272. 059257  | 267. 702 | 967831. 0152 |
| M272T122   | 272. 0609041 | 122. 381 | 4277579. 311 |
| M272T683   | 272. 0655535 | 682. 948 | 1601482. 349 |
| M272T106   | 272. 0763202 | 105. 537 | 20931342. 39 |
| M272T98    | 272. 0776906 | 97. 682  | 10912353. 73 |
| M272T185   | 272. 0752672 | 185. 252 | 16882838     |

|            |              |          |              |
|------------|--------------|----------|--------------|
| M272T146   | 272. 0763775 | 146. 08  | 5347442. 354 |
| M272T492   | 272. 0901937 | 491. 99  | 15368168. 3  |
| M272T327   | 272. 1135543 | 327. 449 | 669862. 5554 |
| M272T315   | 272. 1135858 | 315. 162 | 391625. 9206 |
| M272T294_1 | 272. 1136286 | 294. 152 | 752816. 9463 |
| M272T340   | 272. 1135638 | 339. 772 | 265571. 8079 |
| M272T249   | 272. 1252965 | 249. 466 | 20691900. 57 |
| M272T293   | 272. 1251701 | 292. 621 | 6072751. 25  |
| M272T173   | 272. 1236145 | 173. 092 | 7925990. 165 |
| M272T238   | 272. 1252878 | 238. 024 | 22285262. 53 |
| M272T227   | 272. 1433464 | 227. 421 | 501010. 322  |
| M272T306   | 272. 1438925 | 306. 164 | 1329667. 855 |
| M272T294_2 | 272. 1608273 | 294. 152 | 2801238. 07  |
| M272T160   | 272. 1712434 | 159. 635 | 2339918. 827 |
| M273T112   | 272. 9574865 | 112. 287 | 15898249. 84 |
| M273T82    | 273. 0145454 | 81. 8855 | 65322565. 11 |
| M273T401   | 273. 0430181 | 400. 641 | 1038362. 263 |
| M273T634   | 273. 0454224 | 633. 832 | 813853. 2999 |
| M273T209   | 273. 0602899 | 209. 472 | 4855207. 031 |
| M273T356   | 273. 0579872 | 356. 274 | 669019. 3286 |
| M273T107   | 273. 0603503 | 106. 648 | 4330139. 432 |
| M273T146   | 273. 0613046 | 146. 08  | 3497785. 137 |
| M273T254   | 273. 0612097 | 253. 674 | 7660402. 424 |
| M273T191   | 273. 0611968 | 191. 259 | 5036731. 338 |
| M273T196   | 273. 0731401 | 195. 791 | 522983. 4753 |
| M273T187   | 273. 0731344 | 186. 689 | 576756. 571  |
| M273T290   | 273. 0719251 | 289. 534 | 7564416. 177 |
| M273T369   | 273. 0723665 | 368. 559 | 8673272. 688 |
| M273T83    | 273. 0719853 | 82. 8986 | 1244898. 449 |
| M273T410   | 273. 0867969 | 409. 881 | 2707123. 207 |
| M273T399   | 273. 0970505 | 399. 086 | 1030450. 582 |
| M273T379   | 273. 0970081 | 379. 066 | 585851. 1679 |
| M273T203   | 273. 1087274 | 203. 346 | 925079. 0673 |
| M273T315   | 273. 107713  | 315. 162 | 5912433. 733 |
| M273T361   | 273. 1078934 | 360. 831 | 2376917. 763 |
| M273T332   | 273. 1079301 | 332. 105 | 3508631. 207 |
| M273T343   | 273. 1063574 | 342. 819 | 1894393. 209 |
| M273T249   | 273. 127586  | 249. 466 | 2256555. 743 |
| M273T238   | 273. 1275548 | 238. 024 | 2477751. 244 |
| M273T415   | 273. 1333571 | 414. 571 | 937098. 2141 |
| M273T464   | 273. 134872  | 464. 011 | 698422. 8992 |
| M273T382   | 273. 1329033 | 382. 171 | 1185645. 034 |
| M273T359   | 273. 1334149 | 359. 297 | 1177306. 095 |
| M273T246   | 273. 1462629 | 246. 474 | 502830. 6203 |
| M273T537   | 273. 1703681 | 537. 051 | 27415237. 41 |
| M273T413   | 273. 1704101 | 413. 006 | 899276. 8033 |
| M273T432   | 273. 1704384 | 431. 507 | 813424. 2254 |
| M273T442   | 273. 1704139 | 442. 399 | 798880. 0353 |
| M273T523   | 273. 1704009 | 523. 055 | 3537814. 759 |
| M273T487   | 273. 1703753 | 487. 329 | 7205826. 606 |
| M273T554   | 273. 169967  | 554. 027 | 1249221. 646 |
| M274T112   | 273. 9587698 | 112. 287 | 3014624. 249 |
| M274T688   | 274. 0454603 | 688. 189 | 469364. 2151 |
| M274T253   | 274. 0642329 | 252. 703 | 835854. 9008 |

|            |              |          |              |
|------------|--------------|----------|--------------|
| M274T106   | 274. 0922906 | 105. 537 | 6560735. 289 |
| M274T410   | 274. 090381  | 409. 881 | 613292. 8379 |
| M274T293   | 274. 0922909 | 292. 621 | 2112830. 879 |
| M274T317   | 274. 0920428 | 316. 709 | 2969670. 057 |
| M274T164   | 274. 0923011 | 164. 077 | 2303353. 814 |
| M274T340   | 274. 0922201 | 339. 772 | 2029306. 771 |
| M274T146   | 274. 0922583 | 146. 08  | 1509819. 911 |
| M274T178   | 274. 0922318 | 177. 649 | 1428504. 332 |
| M274T303   | 274. 093701  | 303. 259 | 958812. 24   |
| M274T83    | 274. 1025983 | 82. 8986 | 16970523. 39 |
| M274T203   | 274. 1293997 | 203. 346 | 3242496. 232 |
| M274T352   | 274. 1282788 | 351. 663 | 1859215. 184 |
| M274T390   | 274. 1336657 | 389. 839 | 359882. 0172 |
| M274T188   | 274. 1398662 | 188. 174 | 2803379. 015 |
| M274T404   | 274. 1333843 | 403. 698 | 4021678. 94  |
| M274T537   | 274. 173525  | 537. 051 | 3988466. 618 |
| M275T112   | 274. 9562435 | 112. 287 | 2192990. 586 |
| M275T75    | 274. 9719885 | 74. 6705 | 63565574. 82 |
| M275T86    | 274. 9803874 | 86. 3396 | 1139029. 88  |
| M275T78    | 275. 0194773 | 78. 2661 | 74781333. 7  |
| M275T811   | 275. 0188959 | 811. 292 | 1072358. 779 |
| M275T804   | 275. 0194256 | 803. 615 | 524641. 4017 |
| M275T796   | 275. 0188941 | 796. 202 | 1272851. 674 |
| M275T825   | 275. 0188933 | 824. 864 | 555545. 846  |
| M275T835   | 275. 0189072 | 835. 329 | 325722. 1863 |
| M275T263   | 275. 0511355 | 263. 129 | 1032869. 302 |
| M275T308   | 275. 066618  | 307. 616 | 1239722. 237 |
| M275T293   | 275. 0761281 | 292. 621 | 1996722. 648 |
| M275T107   | 275. 0767078 | 106. 648 | 3200003. 842 |
| M275T379_1 | 275. 075606  | 379. 066 | 1164237. 445 |
| M275T146   | 275. 0761696 | 146. 08  | 2245314. 341 |
| M275T170   | 275. 0761937 | 170. 049 | 2638147. 65  |
| M275T317   | 275. 097514  | 316. 709 | 2767899. 694 |
| M275T393   | 275. 1021571 | 392. 905 | 8765594. 108 |
| M275T379_2 | 275. 1021307 | 379. 066 | 1905626. 586 |
| M275T384   | 275. 1129578 | 383. 727 | 825337. 8193 |
| M275T353   | 275. 1128673 | 353. 163 | 612513. 3805 |
| M275T732   | 275. 1491473 | 731. 793 | 850783. 9124 |
| M275T817   | 275. 1998246 | 817. 214 | 934483. 6316 |
| M276T73_1  | 275. 9745006 | 73. 3444 | 3996019. 149 |
| M276T338   | 276. 0352642 | 338. 222 | 510548. 8356 |
| M276T329   | 276. 0722961 | 328. 999 | 1031616. 896 |
| M276T73_2  | 276. 071544  | 73. 3444 | 5212106. 152 |
| M276T297   | 276. 0817507 | 297. 149 | 2374727. 258 |
| M276T481   | 276. 0870498 | 481. 089 | 2244964. 028 |
| M276T224   | 276. 08669   | 224. 484 | 186097. 0835 |
| M276T106   | 276. 1059758 | 105. 537 | 104725312. 7 |
| M276T118   | 276. 1070718 | 117. 954 | 18080683. 85 |
| M276T294   | 276. 1094652 | 294. 152 | 981667. 9315 |
| M276T146   | 276. 1092865 | 146. 08  | 2091772. 539 |
| M276T303   | 276. 1094604 | 303. 259 | 790338. 8222 |
| M276T591   | 276. 1234234 | 590. 717 | 1170849. 508 |
| M276T232   | 276. 1299737 | 231. 973 | 1566871. 445 |
| M277T85    | 276. 9958368 | 85. 0169 | 3435216. 643 |

|            |              |          |              |
|------------|--------------|----------|--------------|
| M277T466   | 277. 0003045 | 465. 575 | 2275182. 824 |
| M277T50    | 277. 0100846 | 50. 3393 | 45566. 75491 |
| M277T64    | 277. 0111678 | 64. 0412 | 270003. 7901 |
| M277T33    | 277. 0100421 | 32. 8715 | 337888. 5278 |
| M277T106_1 | 277. 0552928 | 105. 537 | 8042985. 733 |
| M277T197_1 | 277. 0554397 | 197. 335 | 1042977. 927 |
| M277T95    | 277. 055882  | 95. 2383 | 11087792. 38 |
| M277T350   | 277. 0652227 | 350. 108 | 18603772. 89 |
| M277T594   | 277. 0632604 | 593. 841 | 700611. 4039 |
| M277T197_2 | 277. 0669307 | 197. 335 | 988557. 5481 |
| M277T506   | 277. 071167  | 505. 99  | 1849727. 047 |
| M277T522   | 277. 0758672 | 521. 5   | 2035665. 669 |
| M277T290   | 277. 081259  | 289. 534 | 1830310. 288 |
| M277T106_2 | 277. 0920398 | 105. 537 | 1231353. 612 |
| M277T475   | 277. 1178565 | 474. 888 | 1218162. 302 |
| M277T347   | 277. 1189756 | 347. 166 | 2396181. 256 |
| M277T331   | 277. 1276028 | 330. 552 | 422512. 0265 |
| M277T378   | 277. 1276197 | 377. 64  | 454237. 3874 |
| M277T358   | 277. 1293477 | 357. 746 | 1205551. 458 |
| M277T344   | 277. 1292757 | 344. 233 | 1053181. 241 |
| M277T759   | 277. 1431673 | 759. 428 | 1020610. 833 |
| M277T779   | 277. 1433341 | 779. 407 | 2095159. 531 |
| M277T810   | 277. 1795925 | 809. 797 | 1957979. 631 |
| M277T715   | 277. 1796778 | 714. 841 | 1966042. 928 |
| M278T338   | 278. 0368155 | 338. 222 | 1608176. 044 |
| M278T694   | 278. 0448153 | 694. 341 | 807113. 6772 |
| M278T72    | 278. 0505221 | 72. 0941 | 2015999. 473 |
| M278T169   | 278. 0553853 | 168. 507 | 517358. 6697 |
| M278T350   | 278. 0696306 | 350. 108 | 1721954. 597 |
| M278T255   | 278. 065857  | 254. 651 | 402640. 5016 |
| M278T356   | 278. 0872589 | 356. 274 | 782542. 5962 |
| M278T340   | 278. 0872361 | 339. 772 | 2198333. 936 |
| M278T172   | 278. 097869  | 171. 546 | 3900684. 704 |
| M278T442   | 278. 1022248 | 442. 399 | 7796709. 228 |
| M278T332   | 278. 1015344 | 332. 105 | 1529826. 856 |
| M278T362   | 278. 1022346 | 362. 384 | 2827158. 752 |
| M278T122   | 278. 1229802 | 122. 381 | 38885259. 71 |
| M278T146   | 278. 1229901 | 146. 08  | 76727815. 53 |
| M278T108   | 278. 1229675 | 108. 082 | 64005640. 33 |
| M278T537   | 278. 1498103 | 537. 051 | 211977. 4154 |
| M278T603   | 278. 1509134 | 603. 04  | 839023. 5704 |
| M278T715   | 278. 1836053 | 714. 841 | 287578. 4952 |
| M279T274   | 278. 9309495 | 273. 82  | 1197713. 186 |
| M279T31_1  | 278. 9883832 | 31. 4228 | 466323. 1638 |
| M279T209   | 279. 037032  | 209. 472 | 95617451. 41 |
| M279T72    | 279. 0329568 | 72. 0941 | 12727787. 35 |
| M279T571   | 279. 049176  | 570. 599 | 1662549. 066 |
| M279T203   | 279. 0709087 | 203. 346 | 1584956. 743 |
| M279T106   | 279. 0717437 | 105. 537 | 8216111. 169 |
| M279T221   | 279. 0704973 | 221. 453 | 1400602. 881 |
| M279T305   | 279. 0713585 | 304. 743 | 3187747. 9   |
| M279T146_1 | 279. 0705699 | 146. 08  | 3791542. 201 |
| M279T324   | 279. 0709141 | 324. 413 | 1965152. 45  |
| M279T170_1 | 279. 0708858 | 170. 049 | 4141232. 825 |

|            |              |           |              |
|------------|--------------|-----------|--------------|
| M279T151   | 279. 0822874 | 150. 528  | 11016389. 1  |
| M279T179   | 279. 0977142 | 179. 046  | 1997994. 779 |
| M279T469   | 279. 0976197 | 468. 69   | 2409674. 282 |
| M279T387   | 279. 0972013 | 386. 78   | 13207254. 3  |
| M279T260   | 279. 0973184 | 259. 983  | 626260. 6456 |
| M279T170_2 | 279. 097667  | 170. 049  | 4892767. 313 |
| M279T164   | 279. 1087442 | 164. 077  | 2625217. 07  |
| M279T146_2 | 279. 1076532 | 146. 08   | 8921433. 365 |
| M279T320   | 279. 1176666 | 319. 785  | 2897924. 107 |
| M279T413   | 279. 1220777 | 413. 006  | 3531098. 448 |
| M279T559   | 279. 1230062 | 558. 574  | 3839772. 202 |
| M279T122   | 279. 1265163 | 122. 381  | 4425466. 882 |
| M279T500   | 279. 1236053 | 499. 759  | 988064. 3141 |
| M279T146_3 | 279. 1260802 | 146. 08   | 8466604. 359 |
| M279T640   | 279. 1221217 | 640. 057  | 1006629. 734 |
| M279T108   | 279. 1259297 | 108. 082  | 8061914. 915 |
| M279T736   | 279. 1597476 | 736. 458  | 11862245. 45 |
| M279T837   | 279. 1952922 | 836. 769  | 2481036. 596 |
| M279T832   | 279. 2311029 | 832. 338  | 26701757. 92 |
| M279T795   | 279. 2300408 | 794. 753  | 12702913. 02 |
| M279T651   | 279. 2310754 | 650. 74   | 14046426. 16 |
| M279T56    | 279. 2295638 | 55. 677   | 313808. 0475 |
| M279T779   | 279. 2300155 | 779. 407  | 13502613. 59 |
| M279T804   | 279. 2299848 | 803. 615  | 8900190. 793 |
| M279T762   | 279. 2300116 | 762. 482  | 9409544. 297 |
| M279T67    | 279. 2336426 | 67. 1831  | 856887. 9185 |
| M279T724   | 279. 2344204 | 724. 158  | 100867045    |
| M279T31_2  | 279. 2337586 | 31. 4228  | 4455505. 892 |
| M279T49    | 279. 2335086 | 49. 06095 | 219428. 1142 |
| M280T209   | 280. 0410931 | 209. 472  | 9175190. 111 |
| M280T337   | 280. 0449145 | 336. 681  | 6767543. 491 |
| M280T249   | 280. 0598146 | 249. 466  | 108277. 0608 |
| M280T349   | 280. 0787116 | 348. 668  | 1881939. 743 |
| M280T364   | 280. 078828  | 363. 928  | 1681002. 766 |
| M280T255   | 280. 0810513 | 255. 113  | 2447433. 912 |
| M280T438   | 280. 0816042 | 437. 734  | 2279046. 176 |
| M280T151   | 280. 085761  | 150. 528  | 651803. 1587 |
| M280T503   | 280. 0831252 | 502. 873  | 1626215. 213 |
| M280T147   | 280. 1026479 | 147. 455  | 3436326. 909 |
| M280T91    | 280. 1025803 | 90. 9026  | 124057818. 7 |
| M280T111   | 280. 1022178 | 110. 926  | 4389481. 525 |
| M280T324   | 280. 1021749 | 324. 413  | 2440178. 555 |
| M280T309   | 280. 1401035 | 309. 091  | 7702506. 639 |
| M280T569   | 280. 1399658 | 569. 091  | 353853. 6136 |
| M280T724   | 280. 2340651 | 724. 158  | 13163783. 63 |
| M280T31    | 280. 2365079 | 31. 4228  | 886763. 8983 |
| M280T778   | 280. 2341147 | 777. 92   | 2506507. 208 |
| M280T801   | 280. 2341112 | 800. 683  | 4869977. 195 |
| M280T829   | 280. 2342335 | 829. 321  | 3681609. 47  |
| M281T87    | 280. 9110903 | 87. 426   | 14797039. 75 |
| M281T209   | 281. 0338617 | 209. 472  | 29183456. 04 |
| M281T338   | 281. 0506493 | 338. 222  | 518710. 4937 |
| M281T329_1 | 281. 0655331 | 328. 999  | 22928922. 31 |
| M281T411   | 281. 0653434 | 411. 444  | 1554739. 005 |

|            |              |          |              |
|------------|--------------|----------|--------------|
| M281T318   | 281. 0655632 | 318. 232 | 12231976. 37 |
| M281T385   | 281. 065563  | 385. 225 | 1023486. 935 |
| M281T218   | 281. 0650419 | 218. 43  | 733183. 0939 |
| M281T441   | 281. 0772848 | 440. 833 | 837383. 6229 |
| M281T199   | 281. 0845214 | 198. 821 | 5014908. 561 |
| M281T84    | 281. 0879767 | 83. 9405 | 10178652. 43 |
| M281T147   | 281. 0878581 | 147. 455 | 6646512. 995 |
| M281T107   | 281. 0877998 | 106. 648 | 22226186. 46 |
| M281T826   | 281. 0868268 | 826. 333 | 814838. 287  |
| M281T95    | 281. 0879305 | 95. 2383 | 223909264. 1 |
| M281T160   | 281. 0878671 | 159. 635 | 16748427. 2  |
| M281T212   | 281. 0973811 | 212. 366 | 15318290. 93 |
| M281T188   | 281. 0971825 | 188. 174 | 4044454. 318 |
| M281T416   | 281. 0951878 | 416. 128 | 940659. 5318 |
| M281T539   | 281. 1019999 | 538. 619 | 509278. 9333 |
| M281T375   | 281. 1127495 | 374. 746 | 863706. 5123 |
| M281T294   | 281. 1130256 | 294. 152 | 561897. 5735 |
| M281T781   | 281. 1193655 | 780. 958 | 2100233. 091 |
| M281T329_2 | 281. 1236889 | 328. 999 | 13178887. 05 |
| M281T401   | 281. 1236663 | 400. 641 | 25185364. 14 |
| M281T312   | 281. 1237417 | 312. 058 | 116278883. 8 |
| M281T743   | 281. 1376407 | 742. 631 | 3579533. 485 |
| M281T356   | 281. 1410668 | 356. 274 | 4558299. 51  |
| M281T615   | 281. 1387795 | 615. 38  | 6613082. 795 |
| M281T470   | 281. 1383524 | 470. 253 | 2449506. 5   |
| M281T626   | 281. 1388458 | 626. 183 | 5336968. 933 |
| M281T597   | 281. 1388898 | 596. 795 | 2601546. 797 |
| M281T452   | 281. 1382207 | 451. 616 | 2856493. 965 |
| M281T764   | 281. 1679565 | 764. 034 | 566578. 5661 |
| M281T707   | 281. 1740224 | 707. 143 | 817372. 3788 |
| M281T669   | 281. 1746328 | 669. 12  | 644809. 7705 |
| M281T720   | 281. 1740556 | 719. 505 | 1007242. 424 |
| M281T823   | 281. 2114544 | 823. 375 | 3814262. 074 |
| M281T816   | 281. 2478262 | 815. 664 | 1053391. 377 |
| M281T835   | 281. 2478788 | 835. 329 | 1390448. 877 |
| M282T65    | 281. 5527848 | 65. 4825 | 85286. 18393 |
| M282T112   | 282. 0451641 | 112. 287 | 1500275. 736 |
| M282T121   | 282. 0468176 | 120. 945 | 4265640. 917 |
| M282T172   | 282. 0466948 | 171. 546 | 3073708. 148 |
| M282T149   | 282. 0468134 | 148. 981 | 4963763. 251 |
| M282T284   | 282. 0457414 | 283. 634 | 599270. 4673 |
| M282T245_1 | 282. 0609431 | 245. 353 | 263742. 7958 |
| M282T326   | 282. 0610317 | 325. 901 | 3553549. 653 |
| M282T294   | 282. 0754742 | 294. 152 | 5636894. 539 |
| M282T309   | 282. 0801874 | 309. 091 | 115019627. 6 |
| M282T95    | 282. 0900638 | 95. 2383 | 21920156. 8  |
| M282T329   | 282. 0963504 | 328. 999 | 2629879. 599 |
| M282T353   | 282. 0964632 | 353. 163 | 2030092. 727 |
| M282T415   | 282. 096471  | 414. 571 | 956316. 1384 |
| M282T370   | 282. 0969659 | 370. 115 | 3723833. 518 |
| M282T245_2 | 282. 0971371 | 244. 891 | 185923. 1008 |
| M282T343   | 282. 0966618 | 342. 819 | 2443002. 683 |
| M282T160   | 282. 0946273 | 159. 635 | 848355. 1371 |
| M282T391   | 282. 098589  | 391. 341 | 1307169. 675 |

|            |              |          |              |
|------------|--------------|----------|--------------|
| M282T401   | 282. 0986817 | 400. 641 | 1170124. 308 |
| M282T327   | 282. 1086508 | 327. 449 | 5972152. 563 |
| M282T226   | 282. 1091208 | 225. 965 | 1999720. 247 |
| M282T314   | 282. 1087199 | 313. 612 | 1194595. 217 |
| M282T347   | 282. 1086521 | 347. 166 | 2945940. 202 |
| M282T419   | 282. 1080758 | 419. 237 | 4522335. 417 |
| M282T358   | 282. 1102874 | 357. 746 | 1421327. 517 |
| M282T286   | 282. 109791  | 286. 433 | 5107548. 973 |
| M282T296   | 282. 1097855 | 295. 704 | 5877437. 403 |
| M282T191   | 282. 1091443 | 191. 259 | 1698222. 685 |
| M282T413   | 282. 1272087 | 413. 006 | 699686. 7141 |
| M282T312   | 282. 1305186 | 312. 058 | 11097872. 44 |
| M282T743   | 282. 141746  | 742. 631 | 467064. 3101 |
| M282T615   | 282. 1419351 | 615. 38  | 836624. 0866 |
| M282T628   | 282. 1418524 | 627. 731 | 479526. 9502 |
| M283T293   | 283. 0407848 | 292. 621 | 1055857. 092 |
| M283T203   | 283. 045157  | 203. 346 | 868502. 8764 |
| M283T402   | 283. 0462246 | 402. 144 | 1276621. 419 |
| M283T642   | 283. 0628801 | 641. 603 | 795191. 1024 |
| M283T772   | 283. 0593371 | 771. 785 | 6937607. 596 |
| M283T235   | 283. 0628199 | 234. 972 | 1184449. 765 |
| M283T784   | 283. 0590659 | 784. 051 | 2844116. 758 |
| M283T713   | 283. 0591273 | 713. 292 | 5012152. 909 |
| M283T160   | 283. 0802608 | 159. 635 | 1870602. 288 |
| M283T208   | 283. 0813602 | 207. 935 | 2025954. 466 |
| M283T344   | 283. 0812074 | 344. 233 | 2069909. 427 |
| M283T372   | 283. 0807993 | 371. 633 | 1252335. 862 |
| M283T309   | 283. 0886092 | 309. 091 | 16524473. 78 |
| M283T291   | 283. 092564  | 291. 076 | 4153060. 455 |
| M283T358   | 283. 0916703 | 357. 746 | 889897. 5288 |
| M283T61    | 283. 1028495 | 61. 4369 | 141134. 4511 |
| M283T57    | 283. 1027774 | 56. 668  | 52173. 22353 |
| M283T68    | 283. 1027679 | 67. 6441 | 260754. 1945 |
| M283T188   | 283. 1021919 | 188. 174 | 6115829. 891 |
| M283T94    | 283. 1022607 | 94. 1615 | 15445608. 96 |
| M283T483   | 283. 1028622 | 482. 656 | 1345749. 316 |
| M283T196   | 283. 1022587 | 195. 791 | 6187109. 826 |
| M283T47    | 283. 1027645 | 46. 936  | 1041502. 142 |
| M283T436   | 283. 1180277 | 436. 18  | 1106680. 724 |
| M283T408   | 283. 1179606 | 408. 368 | 1162056. 976 |
| M283T399   | 283. 1311517 | 399. 086 | 677768. 1485 |
| M283T416   | 283. 1288519 | 416. 128 | 779160. 914  |
| M283T334   | 283. 1288205 | 333. 655 | 1498613. 033 |
| M283T421_1 | 283. 1396163 | 420. 799 | 2713051. 355 |
| M283T184   | 283. 1400472 | 183. 708 | 1192589. 27  |
| M283T675   | 283. 1367192 | 675. 322 | 3482334. 328 |
| M283T335   | 283. 1405234 | 335. 153 | 1499676. 436 |
| M283T557   | 283. 1541673 | 557. 078 | 1299289. 321 |
| M283T421_2 | 283. 1542897 | 420. 799 | 1840747. 794 |
| M283T598   | 283. 1548908 | 598. 341 | 1625340. 859 |
| M283T458   | 283. 1541389 | 457. 763 | 2546683. 019 |
| M283T775   | 283. 1545455 | 774. 892 | 1256689. 569 |
| M283T503   | 283. 1541593 | 502. 873 | 1455644. 509 |
| M283T759   | 283. 1903587 | 759. 428 | 1035401. 19  |

|            |              |          |              |
|------------|--------------|----------|--------------|
| M283T716   | 283. 1903222 | 716. 391 | 2141768. 28  |
| M283T808   | 283. 26286   | 808. 251 | 1389231. 322 |
| M283T31    | 283. 2619141 | 31. 4228 | 1346510. 909 |
| M283T829   | 283. 2628941 | 829. 321 | 4044947. 166 |
| M284T172   | 284. 0624183 | 171. 546 | 15419851. 1  |
| M284T111   | 284. 0618027 | 110. 926 | 3063309. 875 |
| M284T152   | 284. 061797  | 152. 08  | 5320720. 802 |
| M284T191   | 284. 0618913 | 191. 259 | 1854680. 896 |
| M284T294   | 284. 0704499 | 294. 152 | 786266. 2743 |
| M284T713   | 284. 0642178 | 713. 292 | 782157. 7206 |
| M284T355   | 284. 0766694 | 354. 719 | 2285420. 948 |
| M284T237   | 284. 071573  | 236. 518 | 347439. 1966 |
| M284T146   | 284. 0767328 | 146. 08  | 2428788. 056 |
| M284T303   | 284. 0706622 | 303. 259 | 253281. 5472 |
| M284T418   | 284. 0899616 | 417. 689 | 162504. 8164 |
| M284T89    | 284. 0970933 | 88. 8247 | 17606810. 89 |
| M284T187   | 284. 1057047 | 186. 689 | 443066. 0472 |
| M284T196   | 284. 1057416 | 195. 791 | 555882. 7335 |
| M284T227   | 284. 1129789 | 227. 421 | 1401347. 02  |
| M284T388_1 | 284. 1129025 | 388. 326 | 1075007. 762 |
| M284T202   | 284. 1218539 | 201. 897 | 308265. 1861 |
| M284T264   | 284. 1244648 | 263. 845 | 393449. 4855 |
| M284T259   | 284. 1244163 | 259. 134 | 840610. 5253 |
| M284T577   | 284. 1277834 | 576. 787 | 654048. 2976 |
| M284T317   | 284. 1374038 | 316. 709 | 385636. 6099 |
| M284T421   | 284. 1436432 | 420. 799 | 267130. 7975 |
| M284T388_2 | 284. 1492182 | 388. 326 | 354929. 0367 |
| M284T332   | 284. 1606918 | 332. 105 | 5953143. 684 |
| M284T305   | 284. 1607174 | 304. 743 | 1408711. 418 |
| M284T716   | 284. 1935611 | 716. 391 | 302551. 0465 |
| M284T31    | 284. 2661007 | 31. 4228 | 246853. 2068 |
| M285T187   | 285. 037393  | 186. 689 | 3022353. 737 |
| M285T291   | 285. 037278  | 291. 076 | 7362751. 326 |
| M285T118   | 285. 0372942 | 117. 954 | 4154509. 456 |
| M285T211   | 285. 0370206 | 210. 883 | 2170291. 005 |
| M285T164   | 285. 0386245 | 164. 077 | 4841121. 624 |
| M285T698   | 285. 038974  | 698. 034 | 3726535. 069 |
| M285T327   | 285. 0558389 | 327. 449 | 3960119. 384 |
| M285T234   | 285. 0562217 | 233. 519 | 2773397. 392 |
| M285T767   | 285. 0647375 | 767. 145 | 2766593. 941 |
| M285T464   | 285. 0618541 | 464. 011 | 376671. 0607 |
| M285T172   | 285. 0657662 | 171. 546 | 746983. 9421 |
| M285T303   | 285. 0607535 | 303. 259 | 2677377. 499 |
| M285T296   | 285. 0737042 | 295. 704 | 823044. 0161 |
| M285T355   | 285. 0789666 | 354. 719 | 177232. 7789 |
| M285T326   | 285. 0971249 | 325. 901 | 1148272. 89  |
| M285T416   | 285. 0971882 | 416. 128 | 1540229. 729 |
| M285T300   | 285. 1080589 | 300. 176 | 3192485. 997 |
| M285T196   | 285. 1081667 | 195. 791 | 1149424. 828 |
| M285T352   | 285. 1090799 | 351. 663 | 1387845. 378 |
| M285T323   | 285. 1077746 | 322. 862 | 1090961. 467 |
| M285T334   | 285. 1081758 | 333. 655 | 1322895. 539 |
| M285T182   | 285. 1171053 | 182. 156 | 402000. 1969 |
| M285T575   | 285. 1229568 | 575. 222 | 2293315. 372 |



|            |              |          |              |
|------------|--------------|----------|--------------|
| M285T401   | 285. 1336364 | 400. 641 | 1740289. 025 |
| M285T447   | 285. 1691058 | 446. 967 | 2641710. 447 |
| M285T534   | 285. 1691391 | 533. 931 | 3472070. 379 |
| M285T466   | 285. 1691231 | 465. 575 | 8115827. 917 |
| M285T254   | 285. 1673033 | 253. 674 | 16019831. 44 |
| M285T284   | 285. 166249  | 283. 634 | 833807. 3592 |
| M285T703   | 285. 2062468 | 702. 622 | 3924249. 03  |
| M285T779   | 285. 2056985 | 779. 407 | 2946499. 66  |
| M285T640   | 285. 2061983 | 640. 057 | 1538807. 21  |
| M286T346   | 286. 0303266 | 345. 761 | 4111895. 308 |
| M286T290   | 286. 0406028 | 289. 534 | 570925. 534  |
| M286T698   | 286. 0429879 | 698. 034 | 403892. 3576 |
| M286T393   | 286. 0555046 | 392. 905 | 195992. 0841 |
| M286T155   | 286. 0766301 | 155. 033 | 2605977. 823 |
| M286T227   | 286. 0916685 | 227. 421 | 12374321. 33 |
| M286T182   | 286. 0916519 | 182. 156 | 22282020. 09 |
| M286T349   | 286. 0906912 | 348. 668 | 12615160. 08 |
| M286T293   | 286. 091672  | 292. 621 | 11028267. 13 |
| M286T107   | 286. 0917838 | 106. 648 | 5999016. 005 |
| M286T370   | 286. 092265  | 370. 115 | 4741236. 482 |
| M286T388   | 286. 0909182 | 388. 326 | 2834523. 001 |
| M286T237   | 286. 0916735 | 236. 518 | 6549445. 804 |
| M286T146   | 286. 0916682 | 146. 08  | 3500764. 387 |
| M286T323   | 286. 0922189 | 322. 862 | 11232912. 47 |
| M286T338   | 286. 1398244 | 338. 222 | 2739462. 441 |
| M286T264   | 286. 170871  | 263. 845 | 241630. 4488 |
| M286T258   | 286. 1709382 | 258. 208 | 556166. 5723 |
| M286T246   | 286. 1708641 | 246. 474 | 464218. 4822 |
| M286T534   | 286. 1731656 | 533. 931 | 327304. 4234 |
| M286T209   | 286. 1864383 | 209. 472 | 2948123. 725 |
| M286T226   | 286. 188668  | 225. 965 | 1258049. 315 |
| M287T698   | 286. 9754871 | 698. 034 | 180306. 2505 |
| M287T291   | 287. 0331035 | 291. 076 | 1888485. 141 |
| M287T581   | 287. 0431324 | 581. 442 | 2090187. 758 |
| M287T545   | 287. 0446329 | 544. 759 | 3535830. 228 |
| M287T609   | 287. 04314   | 609. 19  | 6117419. 349 |
| M287T562   | 287. 0430161 | 561. 624 | 4476951. 006 |
| M287T517   | 287. 0439401 | 516. 908 | 817872. 8826 |
| M287T121   | 287. 0531774 | 120. 945 | 6753204. 333 |
| M287T158_1 | 287. 0530514 | 158. 1   | 5661835. 129 |
| M287T631   | 287. 0551085 | 630. 737 | 633418. 9964 |
| M287T263   | 287. 0515897 | 263. 129 | 187299. 2807 |
| M287T109   | 287. 0530657 | 109. 475 | 3830927. 11  |
| M287T149   | 287. 0532023 | 148. 981 | 7354394. 821 |
| M287T584   | 287. 0543727 | 584. 484 | 577661. 6282 |
| M287T433   | 287. 0757575 | 433. 06  | 1499864. 235 |
| M287T106   | 287. 0775055 | 105. 537 | 4842460. 903 |
| M287T369   | 287. 0752333 | 368. 559 | 6519181. 355 |
| M287T356   | 287. 0752232 | 356. 274 | 6331209. 091 |
| M287T212   | 287. 0774488 | 212. 366 | 4965093. 046 |
| M287T158_2 | 287. 0754125 | 158. 1   | 4451122. 046 |
| M287T337   | 287. 0758195 | 336. 681 | 5908423. 925 |
| M287T379   | 287. 0757687 | 379. 066 | 2830758. 467 |
| M287T314   | 287. 0753143 | 313. 612 | 5600043. 624 |

|            |              |          |              |
|------------|--------------|----------|--------------|
| M287T444   | 287. 0757207 | 443. 961 | 1468955. 999 |
| M287T347   | 287. 0757962 | 347. 166 | 3731035. 436 |
| M287T294   | 287. 077145  | 294. 152 | 5961188. 783 |
| M287T402   | 287. 0758371 | 402. 144 | 1761083. 031 |
| M287T199   | 287. 0752049 | 198. 821 | 3809314. 432 |
| M287T91    | 287. 0835422 | 90. 9026 | 17433319. 29 |
| M287T50    | 287. 0878431 | 49. 8139 | 112635. 6453 |
| M287T63    | 287. 0879576 | 63. 4597 | 217909. 66   |
| M287T36    | 287. 0877404 | 36. 0041 | 236924. 7077 |
| M287T415   | 287. 0870658 | 414. 571 | 922527. 9193 |
| M287T398   | 287. 0870493 | 397. 585 | 726444. 2404 |
| M287T427   | 287. 087052  | 426. 913 | 1435990. 833 |
| M287T344   | 287. 0867759 | 344. 233 | 72841692. 3  |
| M287T384   | 287. 0869868 | 383. 727 | 1750013. 413 |
| M287T364   | 287. 0870509 | 363. 928 | 2685609. 435 |
| M287T252   | 287. 0942455 | 251. 727 | 159326. 5096 |
| M287T257   | 287. 0942486 | 257. 001 | 115476. 4825 |
| M287T227   | 287. 0954489 | 227. 421 | 1372209. 662 |
| M287T184   | 287. 0933496 | 183. 708 | 1298410. 888 |
| M287T293   | 287. 0953682 | 292. 621 | 892517. 3589 |
| M287T321   | 287. 0954784 | 321. 312 | 1849183. 869 |
| M287T237   | 287. 0955999 | 236. 518 | 841515. 1867 |
| M287T215   | 287. 0954139 | 215. 4   | 336839. 3732 |
| M287T290   | 287. 1242192 | 289. 534 | 941150. 1431 |
| M287T299   | 287. 1242611 | 298. 619 | 926851. 4973 |
| M287T408   | 287. 1241921 | 408. 368 | 2215597. 617 |
| M287T531   | 287. 1237381 | 530. 804 | 880472. 6259 |
| M287T238   | 287. 1237716 | 238. 024 | 682598. 6541 |
| M287T343   | 287. 1243188 | 342. 819 | 1331049. 175 |
| M287T390   | 287. 1504479 | 389. 839 | 6427111. 127 |
| M287T512   | 287. 1496991 | 512. 228 | 1089851. 397 |
| M287T546   | 287. 1490876 | 546. 308 | 499541. 8737 |
| M287T452   | 287. 1500537 | 451. 616 | 1276216. 179 |
| M287T486   | 287. 1853512 | 485. 784 | 1368508. 54  |
| M287T743   | 287. 2217931 | 742. 631 | 1552375. 694 |
| M287T727   | 287. 2217877 | 727. 22  | 2298578. 874 |
| M287T642   | 287. 2216573 | 641. 603 | 2388822. 87  |
| M288T78    | 288. 0020584 | 78. 2661 | 17177259. 68 |
| M288T72    | 288. 035514  | 72. 0941 | 40967920. 04 |
| M288T271   | 288. 0505799 | 270. 88  | 4301075. 428 |
| M288T476   | 288. 0622086 | 476. 451 | 1005715. 114 |
| M288T469   | 288. 0621171 | 468. 69  | 557903. 4516 |
| M288T71    | 288. 0732575 | 70. 607  | 2264485. 708 |
| M288T402   | 288. 0716454 | 402. 144 | 144486. 745  |
| M288T167   | 288. 0818556 | 167. 01  | 39614905. 7  |
| M288T106_1 | 288. 1084649 | 105. 537 | 1671288. 475 |
| M288T209   | 288. 1079032 | 209. 472 | 8492353. 404 |
| M288T169   | 288. 1080663 | 168. 507 | 4357472. 305 |
| M288T296   | 288. 1085135 | 295. 704 | 1216145. 186 |
| M288T106_2 | 288. 1188232 | 105. 537 | 3805145. 975 |
| M288T347   | 288. 1444427 | 347. 166 | 804416. 6914 |
| M288T181   | 288. 1548374 | 180. 601 | 881039. 8997 |
| M289T756   | 288. 8963306 | 756. 343 | 1457072. 867 |
| M289T209_1 | 288. 9052121 | 209. 472 | 690021. 7084 |

|            |              |          |              |
|------------|--------------|----------|--------------|
| M289T187   | 288. 935877  | 186. 689 | 1565144. 506 |
| M289T221   | 288. 9342881 | 221. 453 | 1629546. 315 |
| M289T136   | 288. 93583   | 135. 795 | 21290176. 89 |
| M289T206   | 288. 9357704 | 206. 399 | 1433844. 311 |
| M289T161   | 288. 9342402 | 161. 184 | 5487536. 878 |
| M289T112   | 288. 935843  | 112. 287 | 32759488. 27 |
| M289T178   | 288. 9348197 | 177. 649 | 2010895. 225 |
| M289T87    | 288. 9621146 | 87. 426  | 2854672. 464 |
| M289T77    | 288. 9860594 | 77. 2263 | 572127952. 2 |
| M289T433_1 | 288. 9977743 | 433. 06  | 1727538. 463 |
| M289T94    | 289. 0400826 | 94. 1615 | 9305149. 583 |
| M289T157   | 289. 0497624 | 156. 582 | 1689628. 862 |
| M289T149   | 289. 0499072 | 148. 981 | 1631052. 705 |
| M289T79    | 289. 0547232 | 79. 4105 | 20314810. 58 |
| M289T121   | 289. 0546825 | 120. 945 | 805416. 821  |
| M289T106   | 289. 0547588 | 105. 537 | 5937828. 785 |
| M289T193   | 289. 0558088 | 192. 769 | 1144606. 2   |
| M289T130   | 289. 0546609 | 129. 827 | 415818. 6333 |
| M289T271   | 289. 054722  | 270. 88  | 737348. 8223 |
| M289T433_2 | 289. 0720285 | 433. 06  | 480541. 5288 |
| M289T209_2 | 289. 0658771 | 209. 472 | 275477780. 8 |
| M289T447   | 289. 0721647 | 446. 967 | 475618. 3637 |
| M289T286   | 289. 0674432 | 286. 433 | 969108. 1664 |
| M289T167   | 289. 0863998 | 167. 01  | 3650650. 387 |
| M289T356   | 289. 0931678 | 356. 274 | 2329957. 884 |
| M289T344   | 289. 0932345 | 344. 233 | 3316562. 699 |
| M289T379   | 289. 0903026 | 379. 066 | 1825646. 804 |
| M289T184   | 289. 1031524 | 183. 708 | 4725230. 632 |
| M289T194   | 289. 103052  | 194. 243 | 2721001. 559 |
| M289T170   | 289. 1031905 | 170. 049 | 3068673. 185 |
| M289T427   | 289. 1282054 | 426. 913 | 920210. 6469 |
| M289T416   | 289. 1293271 | 416. 128 | 823193. 0168 |
| M289T804_1 | 289. 145396  | 803. 615 | 3397291. 96  |
| M289T545   | 289. 1630926 | 544. 759 | 1610744. 721 |
| M289T398   | 289. 1658413 | 397. 585 | 1181215. 689 |
| M289T370   | 289. 1653486 | 370. 115 | 1582647. 647 |
| M289T506   | 289. 1642127 | 505. 99  | 732704. 1914 |
| M289T384   | 289. 1659951 | 383. 727 | 4835776. 078 |
| M289T796   | 289. 1799293 | 796. 202 | 815051. 8013 |
| M289T804_2 | 289. 1800159 | 803. 615 | 832998. 7116 |
| M289T209_3 | 289. 2255126 | 209. 472 | 857066. 0167 |
| M290T814   | 289. 9015885 | 814. 118 | 787592. 0576 |
| M290T115   | 289. 9362075 | 115. 123 | 6214808. 673 |
| M290T266   | 290. 0525917 | 265. 541 | 285922. 3302 |
| M290T326   | 290. 0505423 | 325. 901 | 1178223. 301 |
| M290T402   | 290. 0513397 | 402. 144 | 884602. 5328 |
| M290T290   | 290. 061775  | 289. 534 | 13043006. 32 |
| M290T209   | 290. 0700883 | 209. 472 | 29650252. 21 |
| M290T193_1 | 290. 0853702 | 192. 769 | 9561116. 278 |
| M290T92_1  | 290. 0852332 | 91. 9113 | 1389826484   |
| M290T79    | 290. 0863782 | 79. 4105 | 10430941     |
| M290T251   | 290. 0886857 | 251. 004 | 1373395. 874 |
| M290T107   | 290. 0863285 | 106. 648 | 61399916. 52 |
| M290T344   | 290. 0887393 | 344. 233 | 914162. 4841 |

|            |              |          |              |
|------------|--------------|----------|--------------|
| M290T155   | 290. 0864671 | 155. 033 | 6374596. 281 |
| M290T318   | 290. 0870925 | 318. 232 | 1801865. 906 |
| M290T170   | 290. 0863864 | 170. 049 | 9150757. 014 |
| M290T300   | 290. 0981315 | 300. 176 | 3238324. 082 |
| M290T355   | 290. 1127997 | 354. 719 | 1816671. 628 |
| M290T529   | 290. 113401  | 529. 248 | 300150. 0408 |
| M290T164   | 290. 1226909 | 164. 077 | 4266398. 674 |
| M290T106   | 290. 1239154 | 105. 537 | 1614350. 108 |
| M290T347   | 290. 1237769 | 347. 166 | 2238034. 589 |
| M290T486   | 290. 1238919 | 485. 784 | 898339. 8208 |
| M290T193_2 | 290. 1319227 | 192. 769 | 6006681. 268 |
| M290T92_2  | 290. 2468425 | 91. 9113 | 4011017. 405 |
| M291T139   | 290. 9376228 | 138. 719 | 1546311. 895 |
| M291T115   | 290. 93636   | 115. 123 | 4820161. 925 |
| M291T77    | 290. 9823548 | 77. 2263 | 23580678. 54 |
| M291T390   | 291. 0142122 | 389. 839 | 1547428. 684 |
| M291T288   | 291. 0642666 | 287. 981 | 907943. 7487 |
| M291T106   | 291. 0717698 | 105. 537 | 9553934. 792 |
| M291T209   | 291. 0716817 | 209. 472 | 6554514. 504 |
| M291T98    | 291. 0718656 | 97. 682  | 17049113. 93 |
| M291T146_1 | 291. 0700961 | 146. 08  | 1759779. 318 |
| M291T203   | 291. 0823422 | 203. 346 | 1770066. 235 |
| M291T317   | 291. 0821377 | 316. 709 | 1509201. 273 |
| M291T146_2 | 291. 0815973 | 146. 08  | 2273849. 141 |
| M291T352   | 291. 0977256 | 351. 663 | 829291. 5446 |
| M291T92    | 291. 090644  | 91. 9113 | 168916769. 2 |
| M291T312   | 291. 0990384 | 312. 058 | 2839445. 555 |
| M291T334   | 291. 1071102 | 333. 655 | 631270. 4617 |
| M291T254   | 291. 1070106 | 253. 674 | 274473. 319  |
| M291T164   | 291. 1271123 | 164. 077 | 253515. 8669 |
| M291T528   | 291. 1342665 | 527. 688 | 3491294. 251 |
| M291T394   | 291. 1447194 | 394. 467 | 537223. 5779 |
| M291T407   | 291. 1447207 | 406. 813 | 3376273. 805 |
| M291T805   | 291. 1584421 | 805. 145 | 3336576. 078 |
| M291T746   | 291. 1589959 | 745. 747 | 12150085. 6  |
| M291T778   | 291. 1590336 | 777. 92  | 12597023. 76 |
| M291T793   | 291. 1954876 | 793. 233 | 4356221. 848 |
| M291T811   | 291. 1948701 | 811. 292 | 29905810. 86 |
| M291T837   | 291. 1955509 | 836. 769 | 11546854. 08 |
| M292T182   | 292. 0666059 | 182. 156 | 497813. 3069 |
| M292T290   | 292. 0807911 | 289. 534 | 3890495. 663 |
| M292T375   | 292. 0811422 | 374. 746 | 1405718. 142 |
| M292T442   | 292. 0818542 | 442. 399 | 1279632. 721 |
| M292T350   | 292. 0858479 | 350. 108 | 1793623. 097 |
| M292T293_1 | 292. 102424  | 292. 621 | 9643311. 239 |
| M292T188   | 292. 1018377 | 188. 174 | 7039310. 35  |
| M292T396   | 292. 1029473 | 396. 023 | 985868. 4647 |
| M292T91    | 292. 0989173 | 90. 9026 | 3438054. 102 |
| M292T154   | 292. 102497  | 153. 601 | 5550243. 997 |
| M292T235   | 292. 1025145 | 234. 972 | 8220231. 759 |
| M292T178   | 292. 1018088 | 177. 649 | 4242114. 689 |
| M292T303   | 292. 1025389 | 303. 259 | 13463926. 51 |
| M292T620   | 292. 1032478 | 619. 986 | 166142. 3983 |
| M292T291   | 292. 1142904 | 291. 076 | 1310361. 108 |

|            |              |          |              |
|------------|--------------|----------|--------------|
| M292T486   | 292. 1179005 | 485. 784 | 507532. 3085 |
| M292T503   | 292. 1179169 | 502. 873 | 571720. 2049 |
| M292T370   | 292. 1296878 | 370. 115 | 707068. 1668 |
| M292T472   | 292. 1391548 | 471. 768 | 1087155. 017 |
| M292T293_2 | 292. 1379672 | 292. 621 | 11724266. 16 |
| M292T197   | 292. 1379725 | 197. 335 | 30080675. 38 |
| M292T546   | 292. 1392634 | 546. 308 | 328737. 1081 |
| M292T246   | 292. 1380002 | 246. 474 | 26962471. 55 |
| M292T217   | 292. 1380455 | 216. 95  | 106293063    |
| M292T238   | 292. 1380174 | 238. 024 | 100580776. 5 |
| M292T407   | 292. 1492267 | 406. 813 | 230853. 4576 |
| M292T811   | 292. 1978417 | 811. 292 | 5371347. 024 |
| M293T76    | 292. 9428864 | 76. 0763 | 8562884. 645 |
| M293T83    | 293. 029825  | 82. 8986 | 21642299. 3  |
| M293T211   | 293. 0328978 | 210. 883 | 1419533. 888 |
| M293T92    | 293. 0362764 | 91. 9113 | 22861803. 39 |
| M293T203   | 293. 0624871 | 203. 346 | 497170. 9989 |
| M293T411   | 293. 0657141 | 411. 444 | 1306598. 491 |
| M293T106   | 293. 0862478 | 105. 537 | 10683073. 62 |
| M293T293_1 | 293. 0862635 | 292. 621 | 1463162. 467 |
| M293T122   | 293. 0858091 | 122. 381 | 6410947. 851 |
| M293T188_1 | 293. 0858387 | 188. 174 | 4320224. 868 |
| M293T305   | 293. 0873644 | 304. 743 | 936418. 5087 |
| M293T146   | 293. 085979  | 146. 08  | 3564091. 232 |
| M293T223   | 293. 0981766 | 222. 943 | 17401333. 42 |
| M293T743_1 | 293. 0948269 | 742. 631 | 1589366. 651 |
| M293T244   | 293. 0943507 | 243. 976 | 441652. 0001 |
| M293T90    | 293. 0981971 | 89. 8937 | 146052668. 4 |
| M293T512   | 293. 1025579 | 512. 228 | 295168. 9135 |
| M293T302   | 293. 1062829 | 301. 725 | 1780144. 348 |
| M293T188_2 | 293. 1053338 | 188. 174 | 1053244. 219 |
| M293T268   | 293. 1114365 | 267. 702 | 230691. 115  |
| M293T379   | 293. 112594  | 379. 066 | 993328. 1346 |
| M293T546   | 293. 1225613 | 546. 308 | 1196482. 098 |
| M293T435   | 293. 1249479 | 434. 617 | 10417554. 47 |
| M293T415   | 293. 1249384 | 414. 571 | 8647839. 356 |
| M293T264   | 293. 1237368 | 263. 845 | 8350871. 112 |
| M293T293_2 | 293. 1233261 | 292. 621 | 5849392. 278 |
| M293T279   | 293. 1234139 | 278. 627 | 6871461. 255 |
| M293T291   | 293. 1427154 | 291. 076 | 1162527. 663 |
| M293T248   | 293. 1422158 | 247. 773 | 3441727. 662 |
| M293T197   | 293. 1422041 | 197. 335 | 4214597. 049 |
| M293T217   | 293. 1422254 | 216. 95  | 13700893. 75 |
| M293T237   | 293. 1422196 | 236. 518 | 12745908. 59 |
| M293T743_2 | 293. 1735987 | 742. 631 | 1688823. 753 |
| M293T710   | 293. 1733575 | 710. 246 | 8597749. 144 |
| M293T816   | 293. 1735107 | 815. 664 | 9075583. 779 |
| M293T778   | 293. 1735348 | 777. 92  | 64841429. 05 |
| M293T787   | 293. 2108041 | 787. 078 | 5474528. 508 |
| M293T837   | 293. 2107013 | 836. 769 | 15101117. 12 |
| M293T819   | 293. 2107091 | 818. 743 | 86400853. 26 |
| M294T221   | 294. 0469637 | 221. 453 | 28320386. 56 |
| M294T197   | 294. 0469603 | 197. 335 | 9931565. 637 |
| M294T173   | 294. 0470965 | 173. 092 | 1904958. 97  |

|            |              |          |              |
|------------|--------------|----------|--------------|
| M294T241   | 294. 0469194 | 240. 733 | 34414650. 63 |
| M294T323   | 294. 0597077 | 322. 862 | 1235799. 831 |
| M294T83    | 294. 0857944 | 82. 8986 | 137019794. 6 |
| M294T294   | 294. 083415  | 294. 152 | 2135345. 058 |
| M294T235_1 | 294. 0847311 | 234. 972 | 620617. 4146 |
| M294T427   | 294. 0977832 | 426. 913 | 2327924. 579 |
| M294T381   | 294. 09777   | 380. 608 | 1816437. 205 |
| M294T359   | 294. 0977762 | 359. 297 | 2276664. 762 |
| M294T224   | 294. 1018892 | 224. 484 | 1355043. 168 |
| M294T217_1 | 294. 1019362 | 216. 95  | 996875. 8934 |
| M294T688   | 294. 1055167 | 688. 189 | 1473360. 817 |
| M294T376   | 294. 1180203 | 376. 15  | 3033478. 593 |
| M294T264   | 294. 1263617 | 263. 845 | 963588. 8145 |
| M294T433   | 294. 1344877 | 433. 06  | 427480. 8466 |
| M294T217_2 | 294. 1428335 | 216. 95  | 1487104. 46  |
| M294T235_2 | 294. 1430808 | 234. 972 | 1199468. 4   |
| M294T344   | 294. 1539075 | 344. 233 | 585642. 2034 |
| M294T361   | 294. 1542837 | 360. 831 | 806066. 875  |
| M294T778   | 294. 1765676 | 777. 92  | 10517965. 52 |
| M294T837   | 294. 2148887 | 836. 769 | 1937306. 33  |
| M294T819   | 294. 2148053 | 818. 743 | 16069316. 19 |
| M295T73    | 294. 9393332 | 73. 3444 | 2140360. 488 |
| M295T603   | 294. 9809519 | 603. 04  | 2406315. 634 |
| M295T583   | 294. 9809739 | 582. 96  | 1954558. 569 |
| M295T758   | 294. 9810734 | 757. 881 | 2048436. 308 |
| M295T726   | 294. 9846861 | 725. 713 | 966376. 7291 |
| M295T438   | 295. 0241152 | 437. 734 | 1121128. 239 |
| M295T91    | 295. 0314733 | 90. 9026 | 45623543. 41 |
| M295T124   | 295. 0409306 | 123. 792 | 5302171. 608 |
| M295T240   | 295. 0494894 | 239. 574 | 5783009. 413 |
| M295T490   | 295. 0555074 | 490. 434 | 1707529. 612 |
| M295T209   | 295. 0609091 | 209. 472 | 1283137. 498 |
| M295T175   | 295. 064397  | 174. 576 | 3841231. 482 |
| M295T291   | 295. 0661105 | 291. 076 | 2578131. 417 |
| M295T78    | 295. 0662822 | 78. 2661 | 18642506. 97 |
| M295T106_1 | 295. 0662321 | 105. 537 | 19203762. 91 |
| M295T89    | 295. 0662288 | 88. 8247 | 150611240. 8 |
| M295T206   | 295. 0759776 | 206. 399 | 4679823. 554 |
| M295T161   | 295. 0758692 | 161. 184 | 1523625. 758 |
| M295T170   | 295. 0762419 | 170. 049 | 1773479. 859 |
| M295T472   | 295. 081913  | 471. 768 | 922656. 1769 |
| M295T442   | 295. 0817865 | 442. 399 | 1771174. 913 |
| M295T458   | 295. 0819968 | 457. 763 | 1201749. 713 |
| M295T422   | 295. 0817771 | 422. 362 | 2869836. 778 |
| M295T529   | 295. 0818797 | 529. 248 | 420622. 3149 |
| M295T334   | 295. 0818646 | 333. 655 | 1584000. 874 |
| M295T264   | 295. 0806754 | 264. 434 | 937377. 4076 |
| M295T462   | 295. 0925959 | 462. 446 | 1955367. 328 |
| M295T249   | 295. 1023791 | 248. 622 | 196487. 4466 |
| M295T331   | 295. 0923119 | 330. 552 | 918637. 5827 |
| M295T106_2 | 295. 1021807 | 105. 537 | 7338371. 58  |
| M295T427   | 295. 1009745 | 426. 913 | 389608. 5784 |
| M295T308_1 | 295. 1017747 | 307. 616 | 4151395. 833 |
| M295T146   | 295. 1022133 | 146. 08  | 3147001. 949 |

|            |              |          |              |
|------------|--------------|----------|--------------|
| M295T394   | 295. 1010668 | 394. 467 | 532113. 4063 |
| M295T296   | 295. 1015749 | 295. 704 | 2739215. 618 |
| M295T308_2 | 295. 1132043 | 307. 616 | 776039702. 3 |
| M295T358   | 295. 1169812 | 357. 746 | 1161436. 32  |
| M295T439   | 295. 1185914 | 439. 27  | 811470. 2583 |
| M295T393   | 295. 1285943 | 392. 905 | 453739. 9552 |
| M295T478   | 295. 1383746 | 477. 982 | 8426372. 158 |
| M295T466   | 295. 1383362 | 465. 575 | 3381265. 688 |
| M295T508   | 295. 1355397 | 507. 55  | 1520840. 193 |
| M295T701   | 295. 1540314 | 701. 149 | 654589. 6042 |
| M295T766   | 295. 1898237 | 765. 588 | 7086509. 269 |
| M295T648   | 295. 1901356 | 647. 653 | 1499582. 187 |
| M295T799   | 295. 1895587 | 799. 306 | 1434343. 894 |
| M295T784   | 295. 1885366 | 784. 051 | 1894658. 777 |
| M295T753   | 295. 1894998 | 753. 315 | 9809060. 236 |
| M295T819   | 295. 2193736 | 818. 743 | 1592701. 643 |
| M295T837   | 295. 2267924 | 836. 769 | 25113202. 18 |
| M295T308_3 | 295. 2807411 | 307. 616 | 2643851. 656 |
| M296T65    | 295. 5500802 | 65. 4825 | 34792. 8849  |
| M296T241   | 296. 049387  | 240. 733 | 583986. 8552 |
| M296T181   | 296. 0614508 | 180. 601 | 4598797. 072 |
| M296T127   | 296. 0615059 | 126. 755 | 4073112. 667 |
| M296T221   | 296. 0614562 | 221. 453 | 3101610. 18  |
| M296T205_1 | 296. 0602707 | 204. 895 | 2574589. 369 |
| M296T193   | 296. 0614963 | 192. 769 | 4992557. 227 |
| M296T146   | 296. 0614983 | 146. 08  | 5941429. 811 |
| M296T303   | 296. 0615679 | 303. 259 | 1158517. 781 |
| M296T243   | 296. 0602871 | 243. 386 | 1003362. 173 |
| M296T87    | 296. 0697344 | 87. 426  | 14022690. 26 |
| M296T347   | 296. 0768702 | 347. 166 | 1678764. 827 |
| M296T334   | 296. 083647  | 333. 655 | 370075. 123  |
| M296T439   | 296. 0820346 | 439. 27  | 562213. 8681 |
| M296T595   | 296. 0916203 | 595. 35  | 694976. 4176 |
| M296T83    | 296. 085637  | 82. 8986 | 3542507. 87  |
| M296T355   | 296. 098608  | 354. 719 | 11125895. 67 |
| M296T338   | 296. 0989184 | 338. 222 | 4249165. 065 |
| M296T335   | 296. 1130825 | 335. 153 | 904660. 8662 |
| M296T245   | 296. 1132456 | 245. 353 | 816444. 4868 |
| M296T356   | 296. 1130964 | 356. 274 | 2012941. 722 |
| M296T205_2 | 296. 1122998 | 204. 895 | 974371. 6984 |
| M296T399   | 296. 113054  | 399. 086 | 3937223. 343 |
| M296T308   | 296. 1193581 | 307. 616 | 79888679     |
| M297T87    | 296. 8772517 | 87. 426  | 42115355. 56 |
| M297T86    | 296. 9500177 | 86. 3396 | 1210956. 899 |
| M297T595   | 297. 0387831 | 595. 35  | 313857. 5807 |
| M297T33    | 297. 0455154 | 32. 8715 | 403881. 0259 |
| M297T427   | 297. 0598766 | 426. 913 | 6413198. 711 |
| M297T418   | 297. 0599396 | 417. 689 | 8306829. 385 |
| M297T379   | 297. 0606256 | 379. 066 | 1486559. 144 |
| M297T439   | 297. 0725352 | 439. 27  | 2628788. 742 |
| M297T99    | 297. 0829704 | 98. 9649 | 9045453. 791 |
| M297T106   | 297. 0822282 | 105. 537 | 18420657. 92 |
| M297T84    | 297. 0810373 | 83. 9405 | 22136956. 45 |
| M297T147_1 | 297. 0823638 | 147. 455 | 11140666. 51 |

|            |              |          |              |
|------------|--------------|----------|--------------|
| M297T221   | 297. 0811523 | 221. 453 | 5098582. 573 |
| M297T456   | 297. 0951173 | 456. 2   | 746359. 3903 |
| M297T147_2 | 297. 0945524 | 147. 455 | 2071889. 094 |
| M297T512   | 297. 0957941 | 512. 228 | 1223105. 418 |
| M297T444_1 | 297. 0970038 | 443. 961 | 666483. 928  |
| M297T111   | 297. 0926697 | 110. 926 | 2278243. 347 |
| M297T382   | 297. 0963    | 382. 171 | 1793791. 244 |
| M297T520   | 297. 1129174 | 519. 998 | 1769326. 645 |
| M297T283   | 297. 1078325 | 282. 659 | 1708934. 504 |
| M297T509   | 297. 1129715 | 509. 11  | 695633. 164  |
| M297T394   | 297. 1102946 | 394. 467 | 849967. 0282 |
| M297T303   | 297. 106842  | 303. 259 | 5942211. 655 |
| M297T203   | 297. 1175631 | 203. 346 | 1430617. 721 |
| M297T124   | 297. 1193662 | 123. 792 | 1645775. 704 |
| M297T107   | 297. 1175701 | 106. 648 | 7349604. 814 |
| M297T255   | 297. 1181626 | 255. 113 | 3319816. 634 |
| M297T321   | 297. 1181627 | 321. 312 | 29931117. 54 |
| M297T444_2 | 297. 1139032 | 443. 961 | 2020560. 929 |
| M297T332   | 297. 1137277 | 332. 105 | 3613098. 155 |
| M297T704   | 297. 1130615 | 704. 046 | 3040133. 687 |
| M297T146   | 297. 1190293 | 146. 08  | 4462363. 311 |
| M297T773_1 | 297. 1142809 | 773. 333 | 6231934. 22  |
| M297T160   | 297. 1150539 | 159. 635 | 1520506. 637 |
| M297T808   | 297. 123632  | 808. 251 | 1063795. 101 |
| M297T306   | 297. 1181731 | 306. 164 | 56030493. 24 |
| M297T556   | 297. 1332515 | 555. 524 | 847223. 6869 |
| M297T500   | 297. 1332567 | 499. 759 | 1396931. 837 |
| M297T341   | 297. 1333745 | 341. 266 | 1406235. 257 |
| M297T486   | 297. 1327857 | 485. 784 | 1943783. 808 |
| M297T450   | 297. 1456414 | 450. 052 | 552404. 7625 |
| M297T773_2 | 297. 1515669 | 773. 333 | 2653127. 595 |
| M297T703   | 297. 1691024 | 702. 622 | 4661523. 271 |
| M297T681   | 297. 1692176 | 681. 406 | 907389. 8178 |
| M297T770   | 297. 1688714 | 770. 235 | 1139790. 772 |
| M297T747   | 297. 168872  | 747. 194 | 1440159. 201 |
| M297T648   | 297. 1692039 | 647. 653 | 1568563. 712 |
| M297T638   | 297. 1691136 | 638. 484 | 2123647. 774 |
| M297T831   | 297. 206327  | 830. 813 | 1639636. 021 |
| M297T786   | 297. 2063194 | 785. 593 | 1623491. 332 |
| M297T753   | 297. 2055417 | 753. 315 | 3836751. 794 |
| M297T837   | 297. 2367309 | 836. 769 | 691008. 0559 |
| M298T317_1 | 298. 0560692 | 316. 709 | 2863026. 114 |
| M298T220   | 298. 055667  | 219. 979 | 950654. 4704 |
| M298T331   | 298. 0704814 | 330. 552 | 263931. 6509 |
| M298T122   | 298. 0694562 | 122. 381 | 2076542. 995 |
| M298T172   | 298. 0688493 | 171. 546 | 2615568. 721 |
| M298T147   | 298. 076783  | 147. 455 | 3775148. 372 |
| M298T160   | 298. 0767624 | 159. 635 | 4147021. 808 |
| M298T106   | 298. 0843704 | 105. 537 | 1651805. 817 |
| M298T221   | 298. 0847065 | 221. 453 | 358213. 9164 |
| M298T367   | 298. 0926092 | 367. 026 | 1633445. 252 |
| M298T398   | 298. 0926419 | 397. 585 | 1663269. 849 |
| M298T293   | 298. 0925442 | 292. 621 | 2527962. 348 |
| M298T458   | 298. 0927001 | 457. 763 | 1717223. 207 |



|            |             |         |             |
|------------|-------------|---------|-------------|
| M298T317_2 | 298.0925137 | 316.709 | 1501470.182 |
| M298T476   | 298.0926414 | 476.451 | 11171400.41 |
| M298T378   | 298.092621  | 377.64  | 1043828.582 |
| M298T520   | 298.1060662 | 519.998 | 5865681.586 |
| M298T267   | 298.1036717 | 267.169 | 3843747.582 |
| M298T188   | 298.103033  | 188.174 | 11253714.33 |
| M298T306   | 298.1197701 | 306.164 | 5988904.413 |
| M298T321   | 298.1231967 | 321.312 | 3223905.184 |
| M298T422   | 298.1292388 | 422.362 | 5038621.493 |
| M298T447   | 298.1292564 | 446.967 | 632556.3778 |
| M298T337   | 298.1499571 | 336.681 | 6684949.332 |
| M298T234   | 298.1512555 | 233.519 | 295426.9388 |
| M298T346   | 298.1757981 | 345.761 | 727778.321  |
| M299T253_1 | 298.8740555 | 252.703 | 126486.6539 |
| M299T274   | 298.9536629 | 273.82  | 2459654.25  |
| M299T184_1 | 299.0394595 | 183.708 | 7499210.94  |
| M299T294   | 299.0376301 | 294.152 | 43125682.24 |
| M299T253_2 | 299.0425783 | 252.703 | 72138200.19 |
| M299T358   | 299.0443417 | 357.746 | 3030704.574 |
| M299T226   | 299.0505041 | 225.965 | 713011.1095 |
| M299T184_2 | 299.0529125 | 183.708 | 1054567.564 |
| M299T197   | 299.0529643 | 197.335 | 1057839.772 |
| M299T149   | 299.0529349 | 148.981 | 2264895.813 |
| M299T173   | 299.0529212 | 173.092 | 732356.1374 |
| M299T698   | 299.0553617 | 698.034 | 1544615.111 |
| M299T721   | 299.0600139 | 721.058 | 1250560.644 |
| M299T317   | 299.0590911 | 316.709 | 448408.3266 |
| M299T411   | 299.0774478 | 411.444 | 1353617.99  |
| M299T369   | 299.0762453 | 368.559 | 2147591.021 |
| M299T453   | 299.0762593 | 453.126 | 1580433.842 |
| M299T432_1 | 299.0762295 | 431.507 | 3066362.049 |
| M299T302   | 299.0763471 | 301.725 | 943771.0757 |
| M299T263   | 299.0762266 | 263.129 | 2651745.853 |
| M299T475   | 299.0762551 | 474.888 | 2118427.769 |
| M299T282   | 299.0763502 | 281.942 | 1423361.967 |
| M299T387   | 299.0762479 | 386.78  | 3930183.766 |
| M299T323   | 299.0877061 | 322.862 | 820463.7513 |
| M299T476   | 299.0982196 | 476.451 | 1317089.32  |
| M299T118   | 299.0954523 | 117.954 | 5435882.242 |
| M299T658   | 299.0971344 | 658.372 | 2170666.663 |
| M299T104   | 299.097073  | 104.493 | 45523429.03 |
| M299T385   | 299.0983056 | 385.225 | 6619384.845 |
| M299T268   | 299.1069248 | 267.702 | 237079.7648 |
| M299T520   | 299.1105875 | 519.998 | 1022874.777 |
| M299T432_2 | 299.1126518 | 431.507 | 1690859.871 |
| M299T401   | 299.1124783 | 400.641 | 891601.7341 |
| M299T306   | 299.1233772 | 306.164 | 1073677.734 |
| M299T554   | 299.1288243 | 554.027 | 4550062.976 |
| M299T163   | 299.1346455 | 162.615 | 2032696.123 |
| M299T291   | 299.1350665 | 291.076 | 1556038.544 |
| M299T119   | 299.135231  | 119.413 | 1799873.009 |
| M299T208   | 299.1351479 | 207.935 | 3324538.695 |
| M299T107   | 299.1350935 | 106.648 | 2877738.705 |
| M299T715   | 299.1313369 | 714.841 | 169746.972  |

|            |              |          |              |
|------------|--------------|----------|--------------|
| M299T146   | 299. 1351039 | 146. 08  | 2910988. 007 |
| M299T170   | 299. 1344847 | 170. 049 | 3303393. 652 |
| M299T703   | 299. 1486057 | 702. 622 | 410001. 3674 |
| M299T472   | 299. 1486544 | 471. 768 | 4760067. 452 |
| M299T534   | 299. 1481579 | 533. 931 | 1983596. 109 |
| M299T396   | 299. 1485765 | 396. 023 | 834865. 2701 |
| M299T450   | 299. 14851   | 450. 052 | 1671512. 169 |
| M299T337   | 299. 1549058 | 336. 681 | 659190. 1133 |
| M299T483   | 299. 1608919 | 482. 656 | 746983. 0489 |
| M299T467   | 299. 1608803 | 467. 127 | 767306. 3564 |
| M299T622   | 299. 1853893 | 621. 547 | 1395801. 733 |
| M299T559   | 299. 1854892 | 558. 574 | 1323291. 776 |
| M299T743   | 299. 1860122 | 742. 631 | 2334923. 623 |
| M299T701   | 299. 1850939 | 701. 149 | 1027943. 865 |
| M299T591   | 299. 1851354 | 590. 717 | 1210941. 664 |
| M299T784   | 299. 1863802 | 784. 051 | 1933120. 66  |
| M299T253_3 | 299. 2096433 | 252. 703 | 125781. 0723 |
| M299T749   | 299. 2223633 | 748. 742 | 1369029. 786 |
| M299T696   | 299. 2209381 | 695. 893 | 493523. 3026 |
| M300T258   | 299. 8984131 | 258. 208 | 331974. 4878 |
| M300T274   | 299. 9563028 | 273. 82  | 179881. 4321 |
| M300T277   | 300. 0425336 | 276. 825 | 380677. 7296 |
| M300T272   | 300. 0425874 | 271. 596 | 534003. 9902 |
| M300T253   | 300. 0424783 | 252. 703 | 8737208. 147 |
| M300T293   | 300. 0417538 | 292. 621 | 4459932. 594 |
| M300T244   | 300. 0424593 | 243. 976 | 1767834. 397 |
| M300T104   | 300. 0561558 | 104. 493 | 1825416. 418 |
| M300T172   | 300. 0666833 | 171. 546 | 889545. 2145 |
| M300T315   | 300. 0720754 | 315. 162 | 1165111. 536 |
| M300T347   | 300. 0720856 | 347. 166 | 2584281. 696 |
| M300T475   | 300. 0815443 | 474. 888 | 233675. 8548 |
| M300T282   | 300. 0793567 | 281. 942 | 86855. 17836 |
| M300T358   | 300. 084148  | 357. 746 | 601858. 6829 |
| M300T384   | 300. 0989806 | 383. 727 | 727843. 5967 |
| M300T308   | 300. 1047509 | 307. 616 | 13469879. 01 |
| M300T208   | 300. 1079073 | 207. 935 | 37611964. 06 |
| M300T220   | 300. 1078864 | 219. 979 | 20098751     |
| M300T405   | 300. 1099235 | 405. 254 | 1301859. 091 |
| M300T178   | 300. 1078474 | 177. 649 | 12233107. 65 |
| M300T128   | 300. 1189253 | 128. 279 | 13680336. 14 |
| M300T297   | 300. 1195215 | 297. 149 | 4078237. 836 |
| M300T352   | 300. 1177529 | 351. 663 | 1826056. 97  |
| M300T151   | 300. 1189706 | 150. 528 | 42575711. 28 |
| M300T170   | 300. 1189273 | 170. 049 | 23113266     |
| M300T108   | 300. 1188402 | 108. 082 | 21670682. 33 |
| M300T554   | 300. 1286194 | 554. 027 | 728233. 6828 |
| M300T353   | 300. 1587745 | 353. 163 | 234031. 1629 |
| M300T450   | 300. 184293  | 450. 052 | 558405. 2373 |
| M300T393   | 300. 1916515 | 392. 905 | 4635727. 823 |
| M300T69    | 300. 4150214 | 69. 1983 | 470466. 4498 |
| M301T274   | 300. 9491654 | 273. 82  | 457791. 3135 |
| M301T643   | 301. 0343802 | 643. 166 | 5891567. 956 |
| M301T834   | 301. 0327514 | 833. 866 | 1369379. 851 |
| M301T795   | 301. 0327815 | 794. 753 | 1228827. 048 |

|            |              |          |              |
|------------|--------------|----------|--------------|
| M301T660   | 301. 0344053 | 659. 904 | 10642573. 94 |
| M301T766   | 301. 0327791 | 765. 588 | 2028816. 257 |
| M301T741   | 301. 0328003 | 741. 077 | 1931899. 839 |
| M301T805   | 301. 0342464 | 805. 145 | 1920683. 773 |
| M301T779   | 301. 032754  | 779. 407 | 2160481. 806 |
| M301T732   | 301. 0326945 | 731. 793 | 2512723. 584 |
| M301T678   | 301. 0327258 | 678. 416 | 4560992. 574 |
| M301T698   | 301. 0341585 | 698. 034 | 2202770. 256 |
| M301T713   | 301. 034307  | 713. 292 | 5294085. 532 |
| M301T753   | 301. 0329084 | 753. 315 | 2569177. 068 |
| M301T823   | 301. 0358511 | 823. 375 | 1531850. 373 |
| M301T253   | 301. 0444794 | 252. 703 | 1095585. 53  |
| M301T291   | 301. 0555799 | 291. 076 | 1546404. 232 |
| M301T234   | 301. 055619  | 233. 519 | 730320. 2217 |
| M301T146   | 301. 055789  | 146. 08  | 723030. 5389 |
| M301T324_1 | 301. 0653001 | 324. 413 | 649907. 0205 |
| M301T537   | 301. 0705023 | 537. 051 | 2649874. 122 |
| M301T356   | 301. 0676233 | 356. 274 | 681482. 2736 |
| M301T666   | 301. 0725624 | 666. 058 | 709274. 3747 |
| M301T694   | 301. 0705815 | 694. 341 | 1906095. 072 |
| M301T264   | 301. 0666277 | 264. 434 | 1002253. 965 |
| M301T427   | 301. 0921131 | 426. 913 | 2949745. 795 |
| M301T337   | 301. 0927642 | 336. 681 | 4869094. 717 |
| M301T106   | 301. 1036467 | 105. 537 | 2182605. 962 |
| M301T293   | 301. 1037631 | 292. 621 | 1645471. 68  |
| M301T308   | 301. 1081811 | 307. 616 | 815496. 6306 |
| M301T324_2 | 301. 1081651 | 324. 413 | 831878. 8801 |
| M301T208   | 301. 1112451 | 207. 935 | 5592620. 609 |
| M301T190   | 301. 1151583 | 189. 717 | 1397693. 47  |
| M301T554   | 301. 1176144 | 554. 027 | 10464030. 45 |
| M301T151   | 301. 1225683 | 150. 528 | 5283052. 952 |
| M301T108   | 301. 1224639 | 108. 082 | 2004188. 235 |
| M301T170   | 301. 1225509 | 170. 049 | 2650337. 6   |
| M301T352   | 301. 139817  | 351. 663 | 538786. 2218 |
| M301T514   | 301. 1451759 | 513. 768 | 3176097. 414 |
| M301T608   | 301. 1435431 | 607. 625 | 6168199. 394 |
| M301T249   | 301. 1510102 | 249. 466 | 528170. 7246 |
| M301T487   | 301. 1647295 | 487. 329 | 928550. 7972 |
| M301T718   | 301. 1634856 | 717. 942 | 2509844. 114 |
| M301T542   | 301. 1645881 | 541. 673 | 1516407. 634 |
| M301T597   | 301. 1999271 | 596. 795 | 1582222. 713 |
| M301T584   | 301. 1999634 | 584. 484 | 1159826. 274 |
| M301T548   | 301. 2005454 | 547. 805 | 4960352. 462 |
| M301T31    | 301. 2377169 | 31. 4228 | 125582. 4779 |
| M302T258   | 301. 8959013 | 258. 208 | 266423. 4564 |
| M302T643   | 302. 0377364 | 643. 166 | 748884. 4144 |
| M302T71    | 302. 0479603 | 70. 607  | 6632187. 122 |
| M302T378   | 302. 0502328 | 377. 64  | 458100. 9334 |
| M302T331   | 302. 0856167 | 330. 552 | 1377555. 376 |
| M302T106   | 302. 0865033 | 105. 537 | 11282368. 55 |
| M302T253   | 302. 0874842 | 252. 703 | 639243. 6053 |
| M302T293   | 302. 0875159 | 292. 621 | 1922046. 943 |
| M302T146   | 302. 0882226 | 146. 08  | 3080223. 046 |
| M302T657   | 302. 0873778 | 656. 84  | 271331. 484  |

|            |             |         |             |
|------------|-------------|---------|-------------|
| M302T90    | 302.0988988 | 89.8937 | 22482780.74 |
| M302T280   | 302.0974963 | 280.275 | 432951.293  |
| M302T200   | 302.0941172 | 200.362 | 330024.3856 |
| M302T436   | 302.1024405 | 436.18  | 473557.9603 |
| M302T494   | 302.1043086 | 493.56  | 1067132.269 |
| M302T554   | 302.1223461 | 554.027 | 1650933.381 |
| M302T438   | 302.1236399 | 437.734 | 582623.3522 |
| M302T147   | 302.134822  | 147.455 | 1055045.091 |
| M302T549   | 302.2046224 | 549.371 | 893986.8998 |
| M303T663   | 303.0131995 | 663.008 | 252639.2469 |
| M303T82    | 303.0201177 | 81.8855 | 6692746.508 |
| M303T449   | 303.0499308 | 448.527 | 277238.244  |
| M303T534   | 303.0508592 | 533.931 | 1525806.411 |
| M303T347   | 303.0657283 | 347.166 | 3180413.221 |
| M303T119   | 303.0709244 | 119.413 | 2048581.381 |
| M303T182   | 303.0711189 | 182.156 | 1671219.066 |
| M303T272   | 303.0709578 | 272.312 | 798211.392  |
| M303T245   | 303.0710055 | 245.353 | 2313815.341 |
| M303T106   | 303.0722241 | 105.537 | 6646912.028 |
| M303T388_1 | 303.0705492 | 388.326 | 2008074.909 |
| M303T131   | 303.0709218 | 131.207 | 1435940.484 |
| M303T161_1 | 303.0708737 | 161.184 | 2372243.581 |
| M303T173_1 | 303.0710159 | 173.092 | 2686243.748 |
| M303T215   | 303.0704248 | 215.4   | 2225876.63  |
| M303T294   | 303.070276  | 294.152 | 5026894.779 |
| M303T146_1 | 303.070343  | 146.08  | 3188055.17  |
| M303T199   | 303.0710332 | 198.821 | 2905235.772 |
| M303T355   | 303.08218   | 354.719 | 999095.1547 |
| M303T344   | 303.0822411 | 344.233 | 1309207.046 |
| M303T323   | 303.0821719 | 322.862 | 3681937.336 |
| M303T334   | 303.0820953 | 333.655 | 4384751.535 |
| M303T388_2 | 303.0822434 | 388.326 | 1355463.11  |
| M303T291   | 303.107141  | 291.076 | 1145521.453 |
| M303T410   | 303.1071958 | 409.881 | 1682991.39  |
| M303T428   | 303.1059292 | 428.448 | 688272.3718 |
| M303T107   | 303.1185438 | 106.648 | 4596826.516 |
| M303T302   | 303.1185629 | 301.725 | 4950304.534 |
| M303T161_2 | 303.1184095 | 161.184 | 1762676.633 |
| M303T173_2 | 303.1178996 | 173.092 | 11485004.51 |
| M303T133   | 303.1185164 | 132.707 | 1444934.117 |
| M303T146_2 | 303.1184561 | 146.08  | 4226474.283 |
| M303T466   | 303.1447577 | 465.575 | 600014.6836 |
| M303T335   | 303.1534364 | 335.153 | 2982197.77  |
| M303T268   | 303.1660621 | 268.419 | 1701643.204 |
| M303T820   | 303.198625  | 820.294 | 2222708.333 |
| M304T391   | 304.0605594 | 391.341 | 1055142.655 |
| M304T347   | 304.0608943 | 347.166 | 5882227.198 |
| M304T408   | 304.0606218 | 408.368 | 544644.9117 |
| M304T72    | 304.0668237 | 72.0941 | 1479327.965 |
| M304T344   | 304.0764435 | 344.233 | 51513175.46 |
| M304T323   | 304.0767845 | 322.862 | 569617.9007 |
| M304T447   | 304.0818383 | 446.967 | 2272193.174 |
| M304T486   | 304.0820667 | 485.784 | 471961.8699 |
| M304T106   | 304.1012316 | 105.537 | 63146277.58 |

|            |              |          |              |
|------------|--------------|----------|--------------|
| M304T297   | 304. 1013379 | 297. 149 | 4231746. 83  |
| M304T379   | 304. 1025187 | 379. 066 | 922981. 0106 |
| M304T146   | 304. 1012711 | 146. 08  | 10370736. 12 |
| M304T398   | 304. 1031199 | 397. 585 | 1295676. 095 |
| M304T362   | 304. 1119042 | 362. 384 | 6644617. 834 |
| M304T537   | 304. 1277937 | 537. 051 | 1097812. 538 |
| M304T381   | 304. 137765  | 380. 608 | 9129387. 333 |
| M304T364   | 304. 1376363 | 363. 928 | 4743388. 266 |
| M304T577   | 304. 1415666 | 576. 787 | 795171. 7276 |
| M304T234   | 304. 1509124 | 233. 519 | 2522540. 741 |
| M305T740   | 304. 9093451 | 739. 509 | 431724. 7704 |
| M305T136   | 304. 9130359 | 135. 795 | 16651279. 59 |
| M305T115   | 304. 9131934 | 115. 123 | 21585999. 49 |
| M305T84    | 305. 0365562 | 83. 9405 | 1934311. 105 |
| M305T83    | 305. 0497107 | 82. 8986 | 1875679. 075 |
| M305T170   | 305. 0505296 | 170. 049 | 380847. 089  |
| M305T390   | 305. 0616136 | 389. 839 | 1427152. 331 |
| M305T255   | 305. 0611166 | 255. 113 | 462624. 4188 |
| M305T571   | 305. 0649124 | 570. 599 | 657744. 6944 |
| M305T378   | 305. 0750055 | 377. 64  | 193534932. 1 |
| M305T169   | 305. 0733964 | 168. 507 | 1294283. 359 |
| M305T306   | 305. 0833003 | 306. 164 | 51795197. 21 |
| M305T743   | 305. 0794237 | 742. 631 | 4695437. 435 |
| M305T344   | 305. 0832206 | 344. 233 | 7131386. 955 |
| M305T355   | 305. 0862876 | 354. 719 | 6004553. 755 |
| M305T121   | 305. 0889047 | 120. 945 | 8390461. 905 |
| M305T373   | 305. 0864427 | 373. 196 | 2383171. 53  |
| M305T107_1 | 305. 0863459 | 106. 648 | 25011378. 1  |
| M305T96    | 305. 0864205 | 96. 4922 | 12461779. 76 |
| M305T146   | 305. 086379  | 146. 08  | 9641302. 477 |
| M305T178   | 305. 0864905 | 177. 649 | 15352498. 22 |
| M305T291   | 305. 1080069 | 291. 076 | 3334379. 418 |
| M305T107_2 | 305. 1069752 | 106. 648 | 5928889. 655 |
| M305T193   | 305. 1111006 | 192. 769 | 1717756. 202 |
| M305T361   | 305. 121486  | 360. 831 | 953857. 357  |
| M305T317_1 | 305. 1231958 | 316. 709 | 686359. 8677 |
| M305T535   | 305. 1509191 | 535. 488 | 1612819. 158 |
| M305T546   | 305. 1496039 | 546. 308 | 1494535. 685 |
| M305T528   | 305. 1509147 | 527. 688 | 988211. 6334 |
| M305T317_2 | 305. 1596477 | 316. 709 | 1105525. 202 |
| M305T439   | 305. 1596072 | 439. 27  | 1598978. 562 |
| M305T603   | 305. 1696272 | 603. 04  | 1807871. 859 |
| M305T831   | 305. 1748735 | 830. 813 | 1055276. 139 |
| M305T816   | 305. 1738352 | 815. 664 | 1717292. 224 |
| M305T694   | 305. 1747987 | 694. 341 | 869335. 183  |
| M305T732   | 305. 1747802 | 731. 793 | 1392110. 743 |
| M305T837   | 305. 2482767 | 836. 769 | 7241358. 73  |
| M306T290   | 306. 0565339 | 289. 534 | 688651. 8568 |
| M306T209   | 306. 0566126 | 209. 472 | 675043884    |
| M306T261   | 306. 055423  | 261. 138 | 1160429. 898 |
| M306T358_1 | 306. 0565616 | 357. 746 | 307064430. 1 |
| M306T375   | 306. 0608372 | 374. 746 | 1399534. 687 |
| M306T378   | 306. 0764986 | 377. 64  | 21446340. 9  |
| M306T184   | 306. 0876962 | 183. 708 | 7860427. 703 |

|            |              |          |              |
|------------|--------------|----------|--------------|
| M306T306   | 306. 0909543 | 306. 164 | 3667444. 891 |
| M306T106   | 306. 0908076 | 105. 537 | 2509922. 039 |
| M306T293   | 306. 0907867 | 292. 621 | 1210807. 671 |
| M306T317   | 306. 0958989 | 316. 709 | 719518. 925  |
| M306T401   | 306. 0983441 | 400. 641 | 2338812. 162 |
| M306T466   | 306. 1043221 | 465. 575 | 339861. 1468 |
| M306T147   | 306. 1187605 | 147. 455 | 971874. 0436 |
| M306T107   | 306. 1185802 | 106. 648 | 4163005. 787 |
| M306T470   | 306. 1175005 | 470. 253 | 19463261. 38 |
| M306T294   | 306. 1193619 | 294. 152 | 1200148. 582 |
| M306T408   | 306. 1187161 | 408. 368 | 3366506. 526 |
| M306T178   | 306. 1143904 | 177. 649 | 2413335. 409 |
| M306T382   | 306. 1221698 | 382. 171 | 604563. 4063 |
| M306T326   | 306. 1415733 | 325. 901 | 482949. 7801 |
| M306T413   | 306. 1607778 | 413. 006 | 247746. 1035 |
| M306T603   | 306. 1761595 | 603. 04  | 94679. 51886 |
| M306T826   | 306. 2064541 | 826. 333 | 6586644. 128 |
| M306T715   | 306. 2064057 | 714. 841 | 7319598. 82  |
| M306T732   | 306. 2063984 | 731. 793 | 3712327. 105 |
| M306T753   | 306. 2064209 | 753. 315 | 2520834. 289 |
| M306T358_2 | 306. 2299977 | 357. 746 | 964418. 0881 |
| M306T837   | 306. 2507503 | 836. 769 | 1479613. 977 |
| M307T68    | 306. 8545372 | 67. 6441 | 332473. 1955 |
| M307T740   | 306. 9057773 | 739. 509 | 496115. 2571 |
| M307T69    | 307. 0288098 | 69. 1983 | 78307513. 82 |
| M307T209   | 307. 0570766 | 209. 472 | 48590766. 3  |
| M307T98    | 307. 0654991 | 97. 682  | 6964863. 32  |
| M307T358   | 307. 0631122 | 357. 746 | 28210227. 77 |
| M307T523   | 307. 0786255 | 523. 055 | 3651562. 337 |
| M307T193   | 307. 0773187 | 192. 769 | 2533948. 385 |
| M307T252   | 307. 0777022 | 251. 727 | 2224065. 643 |
| M307T378   | 307. 0785695 | 377. 64  | 3238436. 736 |
| M307T334   | 307. 0772863 | 333. 655 | 1362643. 666 |
| M307T306   | 307. 0934889 | 306. 164 | 563136. 4615 |
| M307T106   | 307. 1029426 | 105. 537 | 1591493. 613 |
| M307T294   | 307. 1027808 | 294. 152 | 1342600. 586 |
| M307T601   | 307. 1163612 | 601. 473 | 891526. 6753 |
| M307T331_1 | 307. 115364  | 330. 552 | 1894528. 384 |
| M307T271   | 307. 1130759 | 270. 519 | 592695. 1568 |
| M307T91    | 307. 1142709 | 90. 9026 | 11362614. 48 |
| M307T235   | 307. 1149631 | 234. 972 | 339754. 1879 |
| M307T286   | 307. 1154594 | 286. 433 | 1125799. 027 |
| M307T469   | 307. 1208667 | 468. 69  | 2467932. 355 |
| M307T355   | 307. 1384754 | 354. 719 | 4342364. 859 |
| M307T522   | 307. 1386318 | 521. 5   | 11416225. 06 |
| M307T331_2 | 307. 140454  | 330. 552 | 2380103. 141 |
| M307T369   | 307. 1403478 | 368. 559 | 2056629. 089 |
| M307T494   | 307. 138565  | 493. 56  | 843171. 8853 |
| M307T509   | 307. 138585  | 509. 11  | 7960007. 306 |
| M307T808   | 307. 153915  | 808. 251 | 1098790. 972 |
| M307T535   | 307. 1488436 | 535. 488 | 358088. 1494 |
| M307T90    | 307. 1500147 | 89. 8937 | 4109738. 836 |
| M307T645   | 307. 1909633 | 644. 722 | 2516846. 306 |
| M307T625   | 307. 1896625 | 624. 642 | 5124968. 806 |

|            |              |          |              |
|------------|--------------|----------|--------------|
| M307T795   | 307. 1890669 | 794. 753 | 8947999. 752 |
| M307T694   | 307. 189007  | 694. 341 | 6283479. 918 |
| M307T759   | 307. 1923151 | 759. 428 | 4321515. 176 |
| M307T784   | 307. 1892385 | 784. 051 | 10496515. 25 |
| M307T835   | 307. 1890138 | 835. 329 | 10636970. 4  |
| M307T715   | 307. 2101576 | 714. 841 | 1307117. 242 |
| M308T91    | 307. 9206554 | 90. 9026 | 10756376. 1  |
| M308T668   | 308. 0544948 | 667. 612 | 13695415. 84 |
| M308T372   | 308. 0534104 | 371. 633 | 625021. 4126 |
| M308T358   | 308. 0531994 | 357. 746 | 26606465. 84 |
| M308T209   | 308. 0608975 | 209. 472 | 13830116. 68 |
| M308T161   | 308. 0621138 | 161. 184 | 878664. 7917 |
| M308T194   | 308. 0608298 | 194. 243 | 3415198. 715 |
| M308T390   | 308. 0773624 | 389. 839 | 1187880. 331 |
| M308T378   | 308. 0719095 | 377. 64  | 2227843. 351 |
| M308T106   | 308. 0967367 | 105. 537 | 35332043. 99 |
| M308T92_1  | 308. 0961384 | 91. 9113 | 4288005134   |
| M308T146   | 308. 0962316 | 146. 08  | 11346134. 27 |
| M308T125   | 308. 0962638 | 125. 274 | 10726595. 43 |
| M308T170   | 308. 0997695 | 170. 049 | 6872237. 153 |
| M308T249   | 308. 1019336 | 249. 466 | 4456439. 498 |
| M308T238   | 308. 1018933 | 238. 024 | 5126515. 547 |
| M308T497   | 308. 1135431 | 496. 646 | 891344. 525  |
| M308T375   | 308. 1133929 | 374. 746 | 1459727. 169 |
| M308T481   | 308. 1134375 | 481. 089 | 12588235. 23 |
| M308T432   | 308. 113512  | 431. 507 | 1571917. 267 |
| M308T410   | 308. 1123613 | 409. 881 | 2429898. 402 |
| M308T449   | 308. 1133771 | 448. 527 | 1389787. 985 |
| M308T470   | 308. 113465  | 470. 253 | 7776754. 339 |
| M308T384   | 308. 1133355 | 383. 727 | 1288362. 127 |
| M308T459   | 308. 1134605 | 459. 324 | 1677392. 396 |
| M308T343   | 308. 1134235 | 342. 819 | 1488666. 529 |
| M308T324   | 308. 1133768 | 324. 413 | 1130644. 711 |
| M308T302   | 308. 1339725 | 301. 725 | 598063. 8199 |
| M308T329   | 308. 182576  | 328. 999 | 212380. 9527 |
| M308T795   | 308. 1941674 | 794. 753 | 1609107. 05  |
| M308T626   | 308. 19426   | 626. 183 | 839945. 6969 |
| M308T694   | 308. 1940875 | 694. 341 | 1310546. 324 |
| M308T835   | 308. 193011  | 835. 329 | 1968135. 412 |
| M308T831   | 308. 2225335 | 830. 813 | 2143009. 975 |
| M308T759   | 308. 2225393 | 759. 428 | 614061. 879  |
| M308T92_2  | 308. 2771401 | 91. 9113 | 13220382. 31 |
| M308T66    | 308. 4431264 | 66. 2043 | 59512. 76587 |
| M309T72    | 309. 0467126 | 72. 0941 | 3916120. 91  |
| M309T358   | 309. 0567322 | 357. 746 | 2775267. 252 |
| M309T107   | 309. 0799743 | 106. 648 | 33060836. 43 |
| M309T96    | 309. 0795031 | 96. 4922 | 125751189. 7 |
| M309T388   | 309. 0809625 | 388. 326 | 389154. 9518 |
| M309T721   | 309. 0843363 | 721. 058 | 1144890. 434 |
| M309T188   | 309. 0929491 | 188. 174 | 6501527. 511 |
| M309T294   | 309. 0928469 | 294. 152 | 15925682. 09 |
| M309T154   | 309. 0928378 | 153. 601 | 2295621. 363 |
| M309T146_1 | 309. 1034667 | 146. 08  | 953134. 947  |
| M309T92    | 309. 1043817 | 91. 9113 | 398011766. 4 |

|            |              |          |              |
|------------|--------------|----------|--------------|
| M309T249   | 309. 1057413 | 248. 622 | 573694. 9649 |
| M309T481   | 309. 1123432 | 481. 089 | 2149676. 874 |
| M309T106   | 309. 1172154 | 105. 537 | 6169228. 359 |
| M309T470   | 309. 1186007 | 470. 253 | 1420910. 359 |
| M309T447   | 309. 1186595 | 446. 967 | 3725320. 727 |
| M309T146_2 | 309. 1174703 | 146. 08  | 2988401. 372 |
| M309T343   | 309. 1173841 | 342. 819 | 2445259. 29  |
| M309T323   | 309. 1174116 | 322. 862 | 10186913. 23 |
| M309T178   | 309. 1173291 | 177. 649 | 3423533. 557 |
| M309T407   | 309. 1194507 | 406. 813 | 2016751. 6   |
| M309T462   | 309. 1332403 | 462. 446 | 666900. 4979 |
| M309T537   | 309. 1434727 | 537. 051 | 3270671. 495 |
| M309T569   | 309. 1548452 | 569. 091 | 1414890. 014 |
| M309T554   | 309. 1548079 | 554. 027 | 63771949. 67 |
| M309T703   | 309. 1702524 | 702. 622 | 2929251. 252 |
| M309T770   | 309. 1678141 | 770. 235 | 2488588. 501 |
| M309T586   | 309. 1690694 | 586. 044 | 3565984. 602 |
| M309T733   | 309. 1702938 | 733. 352 | 2151878. 198 |
| M309T704   | 309. 2017812 | 704. 046 | 5171431. 869 |
| M309T787   | 309. 2063983 | 787. 078 | 7345458. 878 |
| M309T808   | 309. 2063447 | 808. 251 | 19394007. 32 |
| M309T795   | 309. 2064201 | 794. 753 | 10279581. 38 |
| M309T834   | 309. 2064028 | 833. 866 | 22959352. 52 |
| M309T669   | 309. 2063307 | 669. 12  | 2076404. 022 |
| M309T693   | 309. 2061649 | 692. 781 | 3721002. 522 |
| M309T724   | 309. 2063928 | 724. 158 | 12544709. 78 |
| M309T741   | 309. 2063621 | 741. 077 | 32627472. 15 |
| M309T756   | 309. 2064226 | 756. 343 | 58558205. 33 |
| M309T820   | 309. 2064351 | 820. 294 | 114694925. 7 |
| M309T775   | 309. 2063379 | 774. 892 | 21577728. 08 |
| M310T172_1 | 310. 0228061 | 171. 546 | 1952592. 457 |
| M310T188_1 | 310. 0771958 | 188. 174 | 3256081. 342 |
| M310T343   | 310. 0798945 | 342. 819 | 305106. 3799 |
| M310T98    | 310. 084911  | 97. 682  | 13308331. 64 |
| M310T331   | 310. 09155   | 330. 552 | 1816252. 24  |
| M310T369   | 310. 0915787 | 368. 559 | 1882150. 691 |
| M310T347   | 310. 0914195 | 347. 166 | 2288633. 511 |
| M310T318   | 310. 0913249 | 318. 232 | 951342. 2824 |
| M310T394   | 310. 0915007 | 394. 467 | 1292896. 74  |
| M310T157   | 310. 0968092 | 156. 582 | 3752888. 309 |
| M310T188_2 | 310. 0969225 | 188. 174 | 2160939. 832 |
| M310T172_2 | 310. 0967983 | 171. 546 | 17274264. 63 |
| M310T237   | 310. 0983659 | 236. 518 | 1277435. 03  |
| M310T294   | 310. 0999801 | 294. 152 | 646641. 3321 |
| M310T92    | 310. 1017701 | 91. 9113 | 76261773. 67 |
| M310T324   | 310. 1138191 | 324. 413 | 1121453. 577 |
| M310T447   | 310. 1222929 | 446. 967 | 138433. 866  |
| M310T323   | 310. 1248319 | 322. 862 | 786999. 6851 |
| M310T202   | 310. 1391711 | 201. 897 | 1034351. 713 |
| M310T358   | 310. 1333277 | 357. 746 | 1211434. 236 |
| M310T795   | 310. 2080197 | 794. 753 | 1764682. 576 |
| M310T741   | 310. 207952  | 741. 077 | 6002242. 77  |
| M310T787   | 310. 2117024 | 787. 078 | 1207505. 1   |
| M310T808   | 310. 2092218 | 808. 251 | 4293130. 317 |



|            |              |          |              |
|------------|--------------|----------|--------------|
| M310T834   | 310. 2092305 | 833. 866 | 4220427. 855 |
| M310T756   | 310. 2092669 | 756. 343 | 11323873. 51 |
| M310T820   | 310. 2092778 | 820. 294 | 21248572. 39 |
| M310T775   | 310. 20933   | 774. 892 | 4147371. 768 |
| M311T77    | 310. 9704853 | 77. 2263 | 6075056. 763 |
| M311T83    | 311. 0074721 | 82. 8986 | 578156. 6886 |
| M311T274   | 311. 0257322 | 273. 82  | 811428. 1244 |
| M311T200   | 311. 0547978 | 200. 362 | 1837510. 475 |
| M311T355   | 311. 0762607 | 354. 719 | 1921139. 794 |
| M311T172_1 | 311. 0740061 | 171. 546 | 386844. 8674 |
| M311T416   | 311. 0761306 | 416. 128 | 1925053. 349 |
| M311T427   | 311. 0881364 | 426. 913 | 561455. 3133 |
| M311T106   | 311. 0991727 | 105. 537 | 35551551. 71 |
| M311T143   | 311. 0972526 | 143. 174 | 13120719. 7  |
| M311T172_2 | 311. 0987842 | 171. 546 | 2385219. 655 |
| M311T504   | 311. 0945124 | 504. 432 | 1892202. 848 |
| M311T492   | 311. 0946575 | 491. 99  | 1394733. 761 |
| M311T473   | 311. 1027211 | 473. 329 | 1510509. 89  |
| M311T155   | 311. 1017627 | 155. 033 | 2057177. 018 |
| M311T90    | 311. 1076703 | 89. 8937 | 24538531. 55 |
| M311T221   | 311. 1081124 | 221. 453 | 2193211. 211 |
| M311T552   | 311. 1148286 | 552. 493 | 2191593. 518 |
| M311T703   | 311. 1271855 | 702. 622 | 680602. 0229 |
| M311T347   | 311. 1323585 | 347. 166 | 1275201. 966 |
| M311T362   | 311. 1324799 | 362. 384 | 1200040. 426 |
| M311T334   | 311. 1323002 | 333. 655 | 6660053. 643 |
| M311T696   | 311. 1492038 | 695. 893 | 665838. 8185 |
| M311T793   | 311. 1663426 | 793. 233 | 12338855. 35 |
| M311T721   | 311. 1857447 | 721. 058 | 6975532. 804 |
| M311T556   | 311. 1844709 | 555. 524 | 2088447. 189 |
| M311T746   | 311. 1858353 | 745. 747 | 593891. 8914 |
| M311T787   | 311. 2203855 | 787. 078 | 593898481. 4 |
| M311T834   | 311. 2205042 | 833. 866 | 12295908. 54 |
| M311T655   | 311. 2204232 | 655. 321 | 1579264. 659 |
| M311T798   | 311. 2204398 | 797. 757 | 98273530. 4  |
| M311T750   | 311. 2205598 | 750. 298 | 57904148. 92 |
| M311T683   | 311. 2207564 | 682. 948 | 3274263. 573 |
| M311T816   | 311. 2207155 | 815. 664 | 72770477. 09 |
| M311T671   | 311. 2205643 | 670. 674 | 4864510. 767 |
| M311T738   | 311. 2206148 | 737. 955 | 7738454. 028 |
| M311T712   | 311. 2205793 | 711. 794 | 22744147. 6  |
| M312T347_1 | 311. 9101236 | 347. 166 | 703990. 5601 |
| M312T787_1 | 312. 0466895 | 787. 078 | 482716. 6309 |
| M312T290   | 312. 0570354 | 289. 534 | 46986805. 77 |
| M312T164   | 312. 0557233 | 164. 077 | 29288180. 94 |
| M312T118   | 312. 0557012 | 117. 954 | 46946051. 54 |
| M312T185   | 312. 055763  | 185. 252 | 32167569. 05 |
| M312T211   | 312. 0558089 | 210. 883 | 11684250. 01 |
| M312T347_2 | 312. 093709  | 347. 166 | 380713216. 8 |
| M312T364_1 | 312. 093678  | 363. 928 | 3162779. 302 |
| M312T107   | 312. 1001739 | 106. 648 | 2099242. 543 |
| M312T399   | 312. 1047572 | 399. 086 | 2544927. 7   |
| M312T208   | 312. 1081099 | 207. 935 | 4819598      |
| M312T473   | 312. 1080558 | 473. 329 | 492877. 7207 |

|            |              |          |              |
|------------|--------------|----------|--------------|
| M312T314   | 312. 1080979 | 313. 612 | 2401883. 627 |
| M312T376   | 312. 109224  | 376. 15  | 1910221. 018 |
| M312T347_3 | 312. 1067811 | 347. 166 | 1935423. 142 |
| M312T425   | 312. 1092403 | 425. 439 | 1047961. 004 |
| M312T364_2 | 312. 109305  | 363. 928 | 1668567. 092 |
| M312T152   | 312. 1080648 | 152. 08  | 631404. 0014 |
| M312T303   | 312. 1080851 | 303. 259 | 1039512. 709 |
| M312T91    | 312. 1181373 | 90. 9026 | 16467422. 75 |
| M312T334   | 312. 140052  | 333. 655 | 435966. 8428 |
| M312T388   | 312. 1445768 | 388. 326 | 1468793. 612 |
| M312T458   | 312. 159114  | 457. 763 | 2058643. 317 |
| M312T517   | 312. 181191  | 516. 908 | 310493. 2241 |
| M312T525   | 312. 1813045 | 524. 56  | 539699. 4478 |
| M312T787_2 | 312. 2245068 | 787. 078 | 117560073. 7 |
| M312T750   | 312. 2244369 | 750. 298 | 11016968. 49 |
| M312T823   | 312. 2210874 | 823. 375 | 4001391. 519 |
| M312T816   | 312. 2244096 | 815. 664 | 13204532. 2  |
| M312T798   | 312. 224445  | 797. 757 | 18696750. 78 |
| M312T834   | 312. 2299431 | 833. 866 | 1879171. 768 |
| M312T347_4 | 312. 2731239 | 347. 166 | 1187964. 82  |
| M313T187   | 313. 0575147 | 186. 689 | 1784538. 9   |
| M313T398   | 313. 0554444 | 397. 585 | 864758. 8913 |
| M313T163   | 313. 0594989 | 162. 615 | 4313322. 47  |
| M313T290   | 313. 0596649 | 289. 534 | 4050167. 504 |
| M313T121   | 313. 0593844 | 120. 945 | 3982329. 732 |
| M313T399   | 313. 0672722 | 399. 086 | 2341784. 731 |
| M313T234   | 313. 0672428 | 233. 519 | 631277. 881  |
| M313T33    | 313. 0804004 | 32. 8715 | 11472125. 81 |
| M313T164   | 313. 0870269 | 164. 077 | 1183596. 25  |
| M313T329_1 | 313. 0920926 | 328. 999 | 1994121. 099 |
| M313T376   | 313. 0922278 | 376. 15  | 2859332. 591 |
| M313T237   | 313. 092318  | 236. 518 | 817500. 5653 |
| M313T185   | 313. 0909272 | 185. 252 | 2923081. 946 |
| M313T347   | 313. 0998823 | 347. 166 | 36228690. 18 |
| M313T364   | 313. 1001135 | 363. 928 | 633084. 9183 |
| M313T329_2 | 313. 1039125 | 328. 999 | 1289893. 164 |
| M313T208   | 313. 1047674 | 207. 935 | 368717. 8026 |
| M313T157   | 313. 1132652 | 156. 582 | 2733165. 889 |
| M313T98    | 313. 1133355 | 97. 682  | 19803112. 75 |
| M313T146   | 313. 1131165 | 146. 08  | 2231600. 476 |
| M313T413   | 313. 127679  | 413. 006 | 1275121. 344 |
| M313T559   | 313. 1638616 | 558. 574 | 1679763. 425 |
| M313T721_1 | 313. 1644849 | 721. 058 | 679613. 1821 |
| M313T792   | 313. 1632315 | 791. 678 | 628157. 7891 |
| M313T652   | 313. 1643815 | 652. 285 | 2308971. 122 |
| M313T801   | 313. 1631911 | 800. 683 | 828350. 0215 |
| M313T672   | 313. 1645752 | 672. 229 | 1283294. 951 |
| M313T522   | 313. 1764365 | 521. 5   | 1140065. 097 |
| M313T741   | 313. 201236  | 741. 077 | 862764. 8372 |
| M313T787   | 313. 2368338 | 787. 078 | 210382657. 2 |
| M313T709   | 313. 2368111 | 708. 697 | 1730181. 552 |
| M313T767   | 313. 236811  | 767. 145 | 24856894. 45 |
| M313T837   | 313. 236851  | 836. 769 | 22318500. 61 |
| M313T721_2 | 313. 236723  | 721. 058 | 1844193. 993 |

|            |              |          |              |
|------------|--------------|----------|--------------|
| M313T31    | 313. 2368591 | 31. 4228 | 707834. 4115 |
| M313T811   | 313. 2367533 | 811. 292 | 13586328. 36 |
| M313T738   | 313. 236797  | 737. 955 | 4832064. 174 |
| M313T752   | 313. 2317965 | 751. 766 | 3455912. 562 |
| M314T425   | 314. 0507355 | 425. 439 | 2641753. 353 |
| M314T418   | 314. 0507214 | 417. 689 | 2288800. 919 |
| M314T182   | 314. 0718357 | 182. 156 | 3021934. 981 |
| M314T122   | 314. 0718572 | 122. 381 | 32899843. 32 |
| M314T157   | 314. 0719321 | 156. 582 | 44319994. 13 |
| M314T130   | 314. 0744684 | 129. 827 | 18318223. 2  |
| M314T149   | 314. 0718537 | 148. 981 | 39616853. 96 |
| M314T109   | 314. 0718554 | 109. 475 | 18794123. 92 |
| M314T200   | 314. 0718388 | 200. 362 | 915828. 1413 |
| M314T170   | 314. 0718515 | 170. 049 | 7550178. 695 |
| M314T390   | 314. 0858335 | 389. 839 | 3814353. 956 |
| M314T421_1 | 314. 0857808 | 420. 799 | 1444912. 526 |
| M314T364   | 314. 0858134 | 363. 928 | 1642975. 912 |
| M314T407   | 314. 0860351 | 406. 813 | 4100862. 946 |
| M314T439   | 314. 0860494 | 439. 27  | 2967372. 92  |
| M314T484   | 314. 1024581 | 484. 221 | 238614. 8724 |
| M314T338   | 314. 1228574 | 338. 222 | 2069440. 781 |
| M314T355   | 314. 1231155 | 354. 719 | 12323062. 21 |
| M314T327   | 314. 123237  | 327. 449 | 1247736. 592 |
| M314T410   | 314. 1231146 | 409. 881 | 602126. 2492 |
| M314T422   | 314. 1276716 | 422. 362 | 299040. 5926 |
| M314T293   | 314. 1324513 | 292. 621 | 2121183. 994 |
| M314T801   | 314. 1604624 | 800. 683 | 438323. 4513 |
| M314T421_2 | 314. 1616751 | 420. 799 | 2714742. 726 |
| M314T372   | 314. 1710486 | 371. 633 | 458207. 7853 |
| M314T752   | 314. 1748159 | 751. 766 | 480303. 3805 |
| M314T787   | 314. 2408707 | 787. 078 | 40460267. 21 |
| M314T767   | 314. 2407876 | 767. 145 | 4593397. 493 |
| M315T77    | 314. 8625353 | 77. 2263 | 13224745. 86 |
| M315T730   | 314. 9380642 | 730. 264 | 6743295. 84  |
| M315T769   | 314. 9870583 | 768. 696 | 406946. 9967 |
| M315T362   | 315. 0454051 | 362. 384 | 1208257. 635 |
| M315T709   | 315. 0508412 | 708. 697 | 3923053. 18  |
| M315T741   | 315. 0508052 | 741. 077 | 307788. 3813 |
| M315T732   | 315. 0507879 | 731. 793 | 749176. 6092 |
| M315T435   | 315. 0693156 | 434. 617 | 586253. 2999 |
| M315T411   | 315. 0701257 | 411. 444 | 2706019. 214 |
| M315T335   | 315. 0706798 | 335. 153 | 3726931. 861 |
| M315T315   | 315. 0706911 | 315. 162 | 1757655. 983 |
| M315T205_1 | 315. 0706775 | 204. 895 | 71388751. 62 |
| M315T122   | 315. 0746905 | 122. 381 | 4832878. 574 |
| M315T158   | 315. 074172  | 158. 1   | 3850503. 695 |
| M315T365   | 315. 0700842 | 365. 475 | 5207267. 962 |
| M315T217   | 315. 0707213 | 216. 95  | 12560208. 33 |
| M315T149   | 315. 074987  | 148. 981 | 3446476. 366 |
| M315T329   | 315. 0825803 | 328. 999 | 1633359. 682 |
| M315T398   | 315. 0825688 | 397. 585 | 4265405. 696 |
| M315T447   | 315. 082583  | 446. 967 | 348305. 0843 |
| M315T376   | 315. 0824861 | 376. 15  | 1283772. 651 |
| M315T433_1 | 315. 0825731 | 433. 06  | 645127. 4558 |

|            |              |          |              |
|------------|--------------|----------|--------------|
| M315T356   | 315. 0857511 | 356. 274 | 797690. 9873 |
| M315T716   | 315. 0879371 | 716. 391 | 1560491. 516 |
| M315T318   | 315. 0826146 | 318. 232 | 550825. 6114 |
| M315T205_2 | 315. 0950821 | 204. 895 | 4387980. 611 |
| M315T439   | 315. 0930188 | 439. 27  | 487917. 4646 |
| M315T540   | 315. 0986736 | 540. 152 | 133891. 7738 |
| M315T455   | 315. 1076635 | 454. 645 | 28088357. 2  |
| M315T311   | 315. 1078378 | 310. 626 | 1288436. 985 |
| M315T370   | 315. 1073429 | 370. 115 | 7853344. 728 |
| M315T492   | 315. 1075993 | 491. 99  | 2766190. 163 |
| M315T293   | 315. 1183701 | 292. 621 | 1648940. 025 |
| M315T337   | 315. 1196646 | 336. 681 | 2638742. 853 |
| M315T405   | 315. 1151187 | 405. 254 | 480376. 871  |
| M315T324   | 315. 1196443 | 324. 413 | 3934642. 142 |
| M315T355   | 315. 1276176 | 354. 719 | 1491554. 488 |
| M315T594   | 315. 1373726 | 593. 841 | 609710. 837  |
| M315T402   | 315. 1394785 | 402. 144 | 2214994. 962 |
| M315T433_2 | 315. 1446872 | 433. 06  | 836984. 2911 |
| M315T449   | 315. 143349  | 448. 527 | 918811. 0961 |
| M315T459   | 315. 143339  | 459. 324 | 1252276. 041 |
| M315T600   | 315. 179215  | 599. 904 | 1863627. 296 |
| M315T556   | 315. 1786828 | 555. 524 | 5026200. 346 |
| M315T529   | 315. 1785564 | 529. 248 | 5740386. 901 |
| M315T828   | 315. 1952389 | 827. 821 | 723258. 3414 |
| M315T835   | 315. 195164  | 835. 329 | 974529. 4856 |
| M315T595   | 315. 2162744 | 595. 35  | 509109. 6657 |
| M315T586   | 315. 2162298 | 586. 044 | 2264218. 227 |
| M315T575   | 315. 2163151 | 575. 222 | 475104. 536  |
| M315T787   | 315. 2431963 | 787. 078 | 4569910. 18  |
| M315T817   | 315. 2535448 | 817. 214 | 10513743. 38 |
| M315T33    | 315. 2527749 | 32. 8715 | 70750. 85734 |
| M315T804   | 315. 2535146 | 803. 615 | 8262075. 073 |
| M316T456   | 316. 0660882 | 456. 2   | 1353713. 551 |
| M316T308_1 | 316. 0700948 | 307. 616 | 5048971. 626 |
| M316T205   | 316. 0766593 | 204. 895 | 8673227. 835 |
| M316T33    | 316. 073257  | 32. 8715 | 181966. 4595 |
| M316T217   | 316. 0766581 | 216. 95  | 1416102. 878 |
| M316T308_2 | 316. 0812229 | 307. 616 | 3965598. 411 |
| M316T112   | 316. 0932667 | 112. 287 | 5890355. 338 |
| M316T436   | 316. 1020992 | 436. 18  | 1020782. 847 |
| M316T421   | 316. 1021551 | 420. 799 | 1175467. 043 |
| M316T294   | 316. 1019473 | 294. 152 | 2124341. 165 |
| M316T455   | 316. 1095252 | 454. 645 | 3984627. 966 |
| M316T361   | 316. 1032139 | 360. 831 | 1255622. 352 |
| M316T372   | 316. 1033806 | 371. 633 | 2693591. 427 |
| M316T185   | 316. 1034423 | 185. 252 | 1353781. 69  |
| M316T340   | 316. 1032801 | 339. 772 | 2711124. 019 |
| M316T288   | 316. 1139831 | 287. 981 | 744204. 1782 |
| M316T438   | 316. 1179792 | 437. 734 | 381261. 6683 |
| M316T509   | 316. 118016  | 509. 11  | 301849. 425  |
| M316T104   | 316. 1139159 | 104. 493 | 14680535. 38 |
| M316T146   | 316. 1139955 | 146. 08  | 1387233. 162 |
| M316T160   | 316. 1126073 | 159. 635 | 1912247. 416 |
| M316T178   | 316. 1499635 | 177. 649 | 1192040. 639 |

|            |              |          |              |
|------------|--------------|----------|--------------|
| M316T529   | 316. 1833763 | 529. 248 | 1446852. 202 |
| M316T399   | 316. 1859078 | 399. 086 | 1473086. 541 |
| M316T332   | 316. 1858052 | 332. 105 | 981019. 853  |
| M317T730   | 316. 9333696 | 730. 264 | 6330464. 689 |
| M317T446   | 317. 0288492 | 445. 522 | 556672. 9855 |
| M317T262   | 317. 0609877 | 262. 302 | 4444690. 728 |
| M317T199   | 317. 0606768 | 198. 821 | 1788990. 955 |
| M317T179_1 | 317. 0657947 | 179. 046 | 692904. 1053 |
| M317T591   | 317. 0651094 | 590. 717 | 1233753. 759 |
| M317T407   | 317. 0644929 | 406. 813 | 1702204. 667 |
| M317T108   | 317. 0636247 | 108. 082 | 755534. 6416 |
| M317T205   | 317. 0757068 | 204. 895 | 1268568. 584 |
| M317T375   | 317. 0858481 | 374. 746 | 1706952. 381 |
| M317T421   | 317. 0859428 | 420. 799 | 4473053. 877 |
| M317T398   | 317. 0878007 | 397. 585 | 617477. 9709 |
| M317T410   | 317. 0877372 | 409. 881 | 1103332. 185 |
| M317T352   | 317. 0877181 | 351. 663 | 1277578. 451 |
| M317T294   | 317. 0864314 | 294. 152 | 1401827. 956 |
| M317T259   | 317. 0864987 | 259. 134 | 4908758. 893 |
| M317T179_2 | 317. 0982043 | 179. 046 | 2742139. 976 |
| M317T361   | 317. 0983964 | 360. 831 | 1378732. 02  |
| M317T537   | 317. 1025595 | 537. 051 | 1628382. 155 |
| M317T288   | 317. 1091055 | 287. 981 | 6871412. 785 |
| M317T344   | 317. 1091717 | 344. 233 | 8746057. 394 |
| M317T318   | 317. 1091857 | 318. 232 | 12412143. 06 |
| M317T379   | 317. 1181408 | 379. 066 | 339254. 8129 |
| M317T438   | 317. 1172649 | 437. 734 | 4420035. 559 |
| M317T324   | 317. 13458   | 324. 413 | 4186459. 293 |
| M317T94    | 317. 1453826 | 94. 1615 | 16403153. 39 |
| M317T498   | 317. 1599965 | 498. 202 | 809316. 4507 |
| M317T470   | 317. 1600345 | 470. 253 | 2853298. 445 |
| M317T444   | 317. 1599585 | 443. 961 | 1846656. 579 |
| M317T535   | 317. 1958592 | 535. 488 | 4090145. 348 |
| M317T545   | 317. 1961014 | 544. 759 | 2897000. 579 |
| M317T588   | 317. 1960804 | 587. 595 | 1513455. 103 |
| M317T556   | 317. 1941921 | 555. 524 | 5050904. 511 |
| M317T528   | 317. 1958887 | 527. 688 | 3607924. 054 |
| M317T503   | 317. 195883  | 502. 873 | 2562675. 149 |
| M318T235   | 317. 9920328 | 234. 972 | 163419. 9459 |
| M318T286   | 318. 0444776 | 286. 433 | 2321531. 505 |
| M318T309   | 318. 0593881 | 309. 091 | 1573979. 155 |
| M318T200   | 318. 0564994 | 200. 362 | 965380. 0047 |
| M318T106_1 | 318. 0808635 | 105. 537 | 5202396. 613 |
| M318T259   | 318. 0902034 | 259. 134 | 708594. 8767 |
| M318T326   | 318. 0931021 | 325. 901 | 573127. 9006 |
| M318T466   | 318. 0985471 | 465. 575 | 687310. 7834 |
| M318T438_1 | 318. 0991263 | 437. 734 | 1023740. 053 |
| M318T344   | 318. 1118303 | 344. 233 | 618867. 8457 |
| M318T438_2 | 318. 1173216 | 437. 734 | 1170305. 438 |
| M318T106_2 | 318. 129197  | 105. 537 | 4608506. 132 |
| M318T266   | 318. 1292526 | 265. 541 | 192552. 8422 |
| M318T251   | 318. 1292275 | 251. 004 | 3168710. 814 |
| M318T188   | 318. 1293536 | 188. 174 | 4238804. 73  |
| M318T214   | 318. 1292582 | 213. 897 | 1764681. 802 |

|            |              |          |              |
|------------|--------------|----------|--------------|
| M318T154   | 318. 1342235 | 153. 601 | 1842449. 805 |
| M318T238   | 318. 1292165 | 238. 024 | 2691309. 407 |
| M318T337   | 318. 1560851 | 336. 681 | 608715. 7219 |
| M319T78    | 318. 9963406 | 78. 2661 | 3510333. 429 |
| M319T69    | 319. 0297937 | 69. 1983 | 140819. 7349 |
| M319T137   | 319. 0406434 | 137. 226 | 995998. 0478 |
| M319T418   | 319. 0447087 | 417. 689 | 593206. 5065 |
| M319T106   | 319. 0666196 | 105. 537 | 8367962. 417 |
| M319T293   | 319. 0665217 | 292. 621 | 1492295. 155 |
| M319T151   | 319. 066379  | 150. 528 | 1745872. 046 |
| M319T390   | 319. 0766973 | 389. 839 | 2814262. 084 |
| M319T331   | 319. 076877  | 330. 552 | 1180773. 371 |
| M319T398_1 | 319. 0764442 | 397. 585 | 1284477. 874 |
| M319T422   | 319. 0765298 | 422. 362 | 530824. 0919 |
| M319T365   | 319. 0796985 | 365. 475 | 2516795. 388 |
| M319T320   | 319. 077315  | 319. 785 | 1040507. 375 |
| M319T542   | 319. 0805162 | 541. 673 | 5779217. 912 |
| M319T71    | 319. 0834239 | 70. 607  | 116592. 3897 |
| M319T220   | 319. 0822129 | 219. 979 | 1293079. 924 |
| M319T398_2 | 319. 0893628 | 397. 585 | 1177633. 856 |
| M319T462   | 319. 1015307 | 462. 446 | 906790. 1474 |
| M319T503   | 319. 0958466 | 502. 873 | 329146. 3054 |
| M319T396   | 319. 1028546 | 396. 023 | 1530436. 953 |
| M319T155   | 319. 1125308 | 155. 033 | 2100775. 108 |
| M319T146   | 319. 1136908 | 146. 08  | 1597122. 454 |
| M319T169   | 319. 1136544 | 168. 507 | 4815180. 784 |
| M319T452   | 319. 1163571 | 451. 616 | 1443259. 208 |
| M319T86    | 319. 1244409 | 86. 3396 | 1825868. 374 |
| M319T472   | 319. 1299247 | 471. 768 | 514286. 9894 |
| M319T349   | 319. 1393088 | 348. 668 | 1457198. 455 |
| M319T382   | 319. 1393719 | 382. 171 | 963268. 4749 |
| M319T362   | 319. 1393736 | 362. 384 | 972240. 8295 |
| M319T405   | 319. 1394292 | 405. 254 | 1143009. 596 |
| M319T756   | 319. 1907793 | 756. 343 | 1571805. 587 |
| M320T69    | 320. 0606265 | 69. 1983 | 9493978. 855 |
| M320T381   | 320. 0769125 | 380. 608 | 789248. 9704 |
| M320T343   | 320. 0755082 | 342. 819 | 1165384. 84  |
| M320T323   | 320. 0755772 | 322. 862 | 7296850. 234 |
| M320T334   | 320. 0721971 | 333. 655 | 2556630. 06  |
| M320T223   | 320. 0823371 | 222. 943 | 759832. 1612 |
| M320T542   | 320. 0835326 | 541. 673 | 840127. 8038 |
| M320T187   | 320. 0973154 | 186. 689 | 4349868. 302 |
| M320T291   | 320. 0984986 | 291. 076 | 542609. 0752 |
| M320T106   | 320. 0972899 | 105. 537 | 23212369. 93 |
| M320T394   | 320. 0972546 | 394. 467 | 224488. 1154 |
| M320T356   | 320. 1136909 | 356. 274 | 2544923. 331 |
| M320T300   | 320. 1106428 | 300. 176 | 1884752. 612 |
| M320T486   | 320. 113603  | 485. 784 | 2355690. 054 |
| M320T418   | 320. 1137063 | 417. 689 | 750829. 2966 |
| M320T317   | 320. 1261378 | 316. 709 | 677290. 2257 |
| M320T384   | 320. 1338564 | 383. 727 | 2756057. 189 |
| M320T335   | 320. 1719773 | 335. 153 | 389458. 2871 |
| M320T344   | 320. 1719322 | 344. 233 | 912592. 4114 |
| M321T176   | 321. 0277591 | 176. 104 | 2171909. 297 |

|          |              |          |              |
|----------|--------------|----------|--------------|
| M321T161 | 321. 0274452 | 161. 184 | 328443. 9514 |
| M321T83  | 321. 0458209 | 82. 8986 | 13517830. 82 |
| M321T155 | 321. 0472342 | 155. 033 | 524585. 8714 |
| M321T68  | 321. 0635698 | 67. 6441 | 1123379. 958 |
| M321T315 | 321. 0744758 | 315. 162 | 2159870. 855 |
| M321T277 | 321. 0690264 | 276. 825 | 1949013. 437 |
| M321T261 | 321. 0691117 | 261. 138 | 1795636. 818 |
| M321T106 | 321. 0811504 | 105. 537 | 11340082. 46 |
| M321T696 | 321. 0813598 | 695. 893 | 1709453. 739 |
| M321T294 | 321. 079944  | 294. 152 | 1691874. 287 |
| M321T200 | 321. 0774616 | 200. 362 | 2946499. 349 |
| M321T170 | 321. 0775565 | 170. 049 | 2849241. 656 |
| M321T160 | 321. 0773567 | 159. 635 | 3267472. 315 |
| M321T327 | 321. 0920916 | 327. 449 | 1476698. 902 |
| M321T203 | 321. 0922577 | 203. 346 | 2465522. 366 |
| M321T188 | 321. 0935326 | 188. 174 | 14123606. 45 |
| M321T297 | 321. 0937112 | 297. 149 | 1606995. 298 |
| M321T215 | 321. 0957815 | 215. 4   | 1193458. 388 |
| M321T370 | 321. 1053865 | 370. 115 | 975615. 1534 |
| M321T401 | 321. 1054158 | 400. 641 | 663608. 5108 |
| M321T575 | 321. 0990816 | 575. 222 | 336868. 9931 |
| M321T349 | 321. 1085888 | 348. 668 | 1408176. 792 |
| M321T280 | 321. 1086524 | 280. 275 | 1748589. 606 |
| M321T187 | 321. 1413714 | 186. 689 | 855153. 6923 |
| M321T534 | 321. 1455068 | 533. 931 | 977430. 0162 |
| M321T466 | 321. 1454611 | 465. 575 | 1324467. 42  |
| M321T415 | 321. 1531566 | 414. 571 | 1932914. 726 |
| M321T382 | 321. 1536479 | 382. 171 | 2590750. 08  |
| M321T405 | 321. 1529701 | 405. 254 | 2466826. 312 |
| M321T428 | 321. 1528909 | 428. 448 | 849081. 692  |
| M321T834 | 321. 1700217 | 833. 866 | 1515882. 279 |
| M321T591 | 321. 1700555 | 590. 717 | 432314. 0231 |
| M321T718 | 321. 1699356 | 717. 942 | 1503182. 408 |
| M321T773 | 321. 1700389 | 773. 333 | 3736110. 903 |
| M321T693 | 321. 2055242 | 692. 781 | 5793952. 381 |
| M321T683 | 321. 205595  | 682. 948 | 3010059. 11  |
| M321T740 | 321. 2055781 | 739. 509 | 6514406. 814 |
| M321T716 | 321. 2055505 | 716. 391 | 7579766. 702 |
| M321T762 | 321. 2055816 | 762. 482 | 6407013. 313 |
| M322T232 | 321. 9036177 | 231. 973 | 292593. 2795 |
| M322T242 | 322. 0520864 | 242. 223 | 7243296. 053 |
| M322T299 | 322. 0508245 | 298. 619 | 8584939. 125 |
| M322T369 | 322. 0698702 | 368. 559 | 846435. 6765 |
| M322T293 | 322. 072641  | 292. 621 | 1205223. 943 |
| M322T337 | 322. 0698423 | 336. 681 | 1536124. 709 |
| M322T376 | 322. 0688067 | 376. 15  | 1097304. 312 |
| M322T401 | 322. 0699952 | 400. 641 | 226027. 2366 |
| M322T347 | 322. 0699544 | 347. 166 | 3963221. 243 |
| M322T320 | 322. 0698956 | 319. 785 | 2658963. 048 |
| M322T387 | 322. 0699499 | 386. 78  | 1018048. 706 |
| M322T172 | 322. 076777  | 171. 546 | 1155991. 584 |
| M322T196 | 322. 0768157 | 195. 791 | 961838. 1556 |
| M322T327 | 322. 0917379 | 327. 449 | 1036782. 308 |
| M322T478 | 322. 0917799 | 477. 982 | 1471034. 078 |

|            |             |         |             |
|------------|-------------|---------|-------------|
| M322T188   | 322.0962246 | 188.174 | 1415434.472 |
| M322T106   | 322.1115069 | 105.537 | 18906854.03 |
| M322T308   | 322.1138843 | 307.616 | 3569827.129 |
| M322T146   | 322.1118911 | 146.08  | 3152219.517 |
| M322T182   | 322.124211  | 182.156 | 302213.7107 |
| M322T350   | 322.1329598 | 350.108 | 241512.9322 |
| M322T473   | 322.1275509 | 473.329 | 1466114.545 |
| M322T452   | 322.1285014 | 451.616 | 1032220.451 |
| M322T706   | 322.1551064 | 705.593 | 537647.4843 |
| M322T718   | 322.1734616 | 717.942 | 143284.6096 |
| M322T730   | 322.2022294 | 730.264 | 177630.1667 |
| M322T740   | 322.2028355 | 739.509 | 213232.5278 |
| M322T834   | 322.208392  | 833.866 | 3039552.435 |
| M322T716   | 322.2098175 | 716.391 | 1364239.277 |
| M323T67    | 322.9680697 | 67.1831 | 9356488.707 |
| M323T581   | 323.019173  | 581.442 | 2826913.718 |
| M323T600   | 323.0190064 | 599.904 | 4970910.581 |
| M323T522   | 323.0204914 | 521.5   | 2305033.493 |
| M323T557   | 323.020576  | 557.078 | 2013341.064 |
| M323T568   | 323.0191433 | 567.543 | 1939293.992 |
| M323T612   | 323.0191702 | 612.3   | 2708773.823 |
| M323T548   | 323.0204935 | 547.805 | 2243256.124 |
| M323T100   | 323.027332  | 100.283 | 7700933.234 |
| M323T349   | 323.0521721 | 348.668 | 3042712.154 |
| M323T369   | 323.0518745 | 368.559 | 5792031.595 |
| M323T242   | 323.0548641 | 242.223 | 562196.8141 |
| M323T341   | 323.0521036 | 341.266 | 1909282.932 |
| M323T297   | 323.0536779 | 297.149 | 1917879.692 |
| M323T381   | 323.0519723 | 380.608 | 1892077.668 |
| M323T81    | 323.0617585 | 80.6174 | 15904352.35 |
| M323T375_1 | 323.0776829 | 374.746 | 2141411.725 |
| M323T344   | 323.0770721 | 344.233 | 1011574.023 |
| M323T467   | 323.0773369 | 467.127 | 647979.3766 |
| M323T163   | 323.0960691 | 162.615 | 18233075.93 |
| M323T121   | 323.0945218 | 120.945 | 49853962.75 |
| M323T331   | 323.0961451 | 330.552 | 5157647.908 |
| M323T106   | 323.0961206 | 105.537 | 151256182.4 |
| M323T212   | 323.094989  | 212.366 | 12413615.62 |
| M323T179   | 323.0961533 | 179.046 | 61624234.27 |
| M323T317   | 323.0961688 | 316.709 | 6410115.312 |
| M323T83    | 323.0947951 | 82.8986 | 138282435   |
| M323T294   | 323.096041  | 294.152 | 5636515.444 |
| M323T146   | 323.0962175 | 146.08  | 29754941.56 |
| M323T238   | 323.0998776 | 238.024 | 11129309.14 |
| M323T95    | 323.0961514 | 95.2383 | 61646466.55 |
| M323T290   | 323.1085428 | 289.534 | 2194726.772 |
| M323T191   | 323.1098507 | 191.259 | 710006.2089 |
| M323T747   | 323.1270702 | 747.194 | 302267.7475 |
| M323T432   | 323.1262257 | 431.507 | 223457.2323 |
| M323T251   | 323.1294756 | 251.004 | 1291172.418 |
| M323T458   | 323.1237438 | 457.763 | 2934676.942 |
| M323T418   | 323.1261214 | 417.689 | 413435.9359 |
| M323T187   | 323.133281  | 186.689 | 8071435.323 |
| M323T375_2 | 323.1359277 | 374.746 | 5561851.145 |



|            |              |          |              |
|------------|--------------|----------|--------------|
| M323T293   | 323. 1347014 | 292. 621 | 2035601. 658 |
| M323T197   | 323. 1333394 | 197. 335 | 18032043. 72 |
| M323T321   | 323. 1332709 | 321. 312 | 6390136. 441 |
| M323T332   | 323. 1347419 | 332. 105 | 1659523. 452 |
| M323T475   | 323. 1333432 | 474. 888 | 385056. 7882 |
| M323T546   | 323. 1484964 | 546. 308 | 263302. 628  |
| M323T618   | 323. 1487169 | 618. 45  | 961111. 1357 |
| M323T594   | 323. 1719238 | 593. 841 | 17270270. 8  |
| M323T701   | 323. 1857106 | 701. 149 | 2159624. 846 |
| M323T822   | 323. 1856354 | 821. 831 | 5751433. 56  |
| M323T716   | 323. 1857262 | 716. 391 | 3034359. 421 |
| M323T801   | 323. 1857161 | 800. 683 | 101318215. 4 |
| M323T549   | 323. 1844619 | 549. 371 | 1977507. 903 |
| M323T784   | 323. 1855531 | 784. 051 | 3009957. 277 |
| M323T775   | 323. 2201117 | 774. 892 | 3492752. 031 |
| M323T721   | 323. 2229013 | 721. 058 | 10006235. 19 |
| M323T68    | 323. 4696451 | 67. 6441 | 1756018. 955 |
| M324T234   | 323. 897681  | 233. 519 | 408686. 5228 |
| M324T242   | 324. 0482697 | 242. 223 | 362038. 9507 |
| M324T369   | 324. 0568222 | 368. 559 | 916636. 6135 |
| M324T184   | 324. 0567939 | 183. 708 | 1339553. 954 |
| M324T293   | 324. 0565862 | 292. 621 | 651195. 5633 |
| M324T155   | 324. 0553917 | 155. 033 | 1657442. 917 |
| M324T199   | 324. 0566618 | 198. 821 | 955140. 7998 |
| M324T170   | 324. 0567161 | 170. 049 | 1219819. 504 |
| M324T347   | 324. 067656  | 347. 166 | 1209821. 409 |
| M324T212   | 324. 087184  | 212. 366 | 2029313. 262 |
| M324T106   | 324. 1010906 | 105. 537 | 17010165. 49 |
| M324T179   | 324. 100896  | 179. 046 | 7416790. 115 |
| M324T238   | 324. 1023819 | 238. 024 | 970228. 3336 |
| M324T433   | 324. 1078339 | 433. 06  | 1517640. 981 |
| M324T329   | 324. 1079057 | 328. 999 | 1455750. 422 |
| M324T421   | 324. 1079399 | 420. 799 | 974062. 1394 |
| M324T314   | 324. 1079421 | 313. 612 | 601360. 1665 |
| M324T444   | 324. 1079851 | 443. 961 | 1683282. 026 |
| M324T404   | 324. 1080068 | 403. 698 | 1269043. 998 |
| M324T343   | 324. 1080374 | 342. 819 | 1975833. 652 |
| M324T461   | 324. 1078892 | 460. 89  | 896579. 0176 |
| M324T373   | 324. 1154895 | 373. 196 | 1645195. 246 |
| M324T355   | 324. 1283094 | 354. 719 | 425931. 9203 |
| M324T100   | 324. 1308351 | 100. 283 | 18938027. 68 |
| M324T164   | 324. 129125  | 164. 077 | 364946. 0068 |
| M324T197   | 324. 1356732 | 197. 335 | 2353170. 593 |
| M324T594   | 324. 1742801 | 593. 841 | 2373855. 115 |
| M324T801   | 324. 1854324 | 800. 683 | 14800691. 17 |
| M324T715   | 324. 1894364 | 714. 841 | 378302. 847  |
| M324T67    | 324. 4735554 | 67. 1831 | 53722. 35138 |
| M325T86    | 324. 9427376 | 86. 3396 | 810724. 3036 |
| M325T197_1 | 325. 0218634 | 197. 335 | 79321. 18984 |
| M325T369   | 325. 0493907 | 368. 559 | 1387413. 201 |
| M325T350_1 | 325. 0496261 | 350. 108 | 719552. 1815 |
| M325T91    | 325. 052236  | 90. 9026 | 14381093. 8  |
| M325T355   | 325. 0687418 | 354. 719 | 672322. 8491 |
| M325T291   | 325. 067507  | 291. 076 | 749543. 2118 |

|            |              |          |              |
|------------|--------------|----------|--------------|
| M325T347   | 325. 0686781 | 347. 166 | 831252. 66   |
| M325T94    | 325. 0771452 | 94. 1615 | 262795606    |
| M325T124   | 325. 0867927 | 123. 792 | 7994892. 708 |
| M325T147   | 325. 0868692 | 147. 455 | 13687198. 83 |
| M325T172   | 325. 0868513 | 171. 546 | 20834972. 68 |
| M325T111   | 325. 0868851 | 110. 926 | 3414083. 934 |
| M325T456   | 325. 0923836 | 456. 2   | 1658451. 334 |
| M325T390   | 325. 0924311 | 389. 839 | 23429471. 21 |
| M325T350_2 | 325. 0925916 | 350. 108 | 1073834. 951 |
| M325T370   | 325. 092531  | 370. 115 | 2819594. 636 |
| M325T416   | 325. 0924788 | 416. 128 | 1999291. 958 |
| M325T446   | 325. 092332  | 445. 522 | 1904835. 257 |
| M325T254   | 325. 09121   | 253. 674 | 1758816. 295 |
| M325T335   | 325. 1011496 | 335. 153 | 343248. 3515 |
| M325T106_1 | 325. 1023923 | 105. 537 | 2633725. 052 |
| M325T179   | 325. 1020293 | 179. 046 | 1232403. 648 |
| M325T238   | 325. 0992096 | 238. 024 | 2700021. 317 |
| M325T373   | 325. 1070418 | 373. 196 | 166987. 399  |
| M325T302   | 325. 1063842 | 301. 725 | 3188399. 215 |
| M325T106_2 | 325. 1132387 | 105. 537 | 14470598. 16 |
| M325T206   | 325. 1133396 | 206. 399 | 1422886. 116 |
| M325T279   | 325. 1244489 | 279. 217 | 336171. 0989 |
| M325T296   | 325. 1244608 | 295. 704 | 1063829. 108 |
| M325T537   | 325. 1305876 | 537. 051 | 271776. 8277 |
| M325T486   | 325. 1286082 | 485. 784 | 486203. 0308 |
| M325T197_2 | 325. 1382473 | 197. 335 | 292681. 208  |
| M325T408   | 325. 1383346 | 408. 368 | 1103317. 194 |
| M325T375   | 325. 1479811 | 374. 746 | 3258093. 085 |
| M325T419   | 325. 14947   | 419. 237 | 403035. 2513 |
| M325T308   | 325. 1509734 | 307. 616 | 2218439. 324 |
| M325T259   | 325. 1508889 | 259. 134 | 1742213. 21  |
| M325T407   | 325. 1494205 | 406. 813 | 2204451. 821 |
| M325T385   | 325. 1508035 | 385. 225 | 8653940. 656 |
| M325T698   | 325. 1647617 | 698. 034 | 387488. 4189 |
| M325T447   | 325. 1761399 | 446. 967 | 134071. 7441 |
| M325T813   | 325. 1843444 | 812. 68  | 20683819. 59 |
| M325T835_1 | 325. 1814999 | 835. 329 | 899285. 7527 |
| M325T801   | 325. 1885721 | 800. 683 | 2757890. 911 |
| M325T669   | 325. 1990396 | 669. 12  | 3345630. 409 |
| M325T720   | 325. 1990902 | 719. 505 | 3883203. 406 |
| M325T694_1 | 325. 1991127 | 694. 341 | 2448904. 942 |
| M325T649   | 325. 2007842 | 649. 195 | 5302485. 784 |
| M325T706   | 325. 200964  | 705. 593 | 4024614. 449 |
| M325T795   | 325. 2028399 | 794. 753 | 3541411. 103 |
| M325T598   | 325. 2008956 | 598. 341 | 5465780. 608 |
| M325T683   | 325. 2029546 | 682. 948 | 3342139. 369 |
| M325T811   | 325. 2009782 | 811. 292 | 6669604. 407 |
| M325T658   | 325. 2009076 | 658. 372 | 4809545. 334 |
| M325T752   | 325. 2008617 | 751. 766 | 3505204. 177 |
| M325T733   | 325. 2009119 | 733. 352 | 3279585. 76  |
| M325T773   | 325. 202427  | 773. 333 | 8615470. 703 |
| M325T638   | 325. 203088  | 638. 484 | 4105649. 15  |
| M325T33    | 325. 2373365 | 32. 8715 | 419957. 3227 |
| M325T726   | 325. 2320986 | 725. 713 | 6302310. 328 |

|            |              |          |              |
|------------|--------------|----------|--------------|
| M325T828   | 325. 2385263 | 827. 821 | 1761132. 777 |
| M325T703   | 325. 2385536 | 702. 622 | 1744695. 163 |
| M325T820   | 325. 2386088 | 820. 294 | 2035014. 256 |
| M325T694_2 | 325. 2390318 | 694. 341 | 1242797. 412 |
| M325T796   | 325. 239221  | 796. 202 | 5294831. 536 |
| M325T835_2 | 325. 2391519 | 835. 329 | 1344166. 294 |
| M326T121   | 326. 0717298 | 120. 945 | 5032037. 999 |
| M326T813_1 | 326. 0731484 | 812. 68  | 4198489. 377 |
| M326T184   | 326. 0717112 | 183. 708 | 20464280. 63 |
| M326T721   | 326. 0759962 | 721. 058 | 1714822. 975 |
| M326T302   | 326. 071933  | 301. 725 | 806977. 7929 |
| M326T131   | 326. 071745  | 131. 207 | 6285640. 647 |
| M326T149   | 326. 0718075 | 148. 981 | 9932599. 78  |
| M326T94    | 326. 0785736 | 94. 1615 | 28429707. 1  |
| M326T172   | 326. 0901425 | 171. 546 | 2163660. 071 |
| M326T390   | 326. 0970256 | 389. 839 | 3225706. 479 |
| M326T375   | 326. 1033622 | 374. 746 | 729013. 5804 |
| M326T609_1 | 326. 1023108 | 609. 19  | 668551. 6853 |
| M326T321   | 326. 1080609 | 321. 312 | 1158888. 503 |
| M326T290   | 326. 1303578 | 289. 534 | 1361958. 692 |
| M326T272   | 326. 1235179 | 272. 312 | 1480639. 833 |
| M326T343   | 326. 1234191 | 342. 819 | 78324220. 2  |
| M326T303   | 326. 1299521 | 303. 259 | 1938931. 435 |
| M326T484   | 326. 1387719 | 484. 221 | 152579. 3179 |
| M326T750   | 326. 1471042 | 750. 298 | 900287. 7922 |
| M326T554   | 326. 1478423 | 554. 027 | 2232321. 05  |
| M326T415   | 326. 1608537 | 414. 571 | 221089. 1505 |
| M326T813_2 | 326. 1889009 | 812. 68  | 3271803. 172 |
| M326T651   | 326. 1961056 | 650. 74  | 15452244. 26 |
| M326T736   | 326. 197589  | 736. 458 | 1118414. 162 |
| M326T713   | 326. 1959518 | 713. 292 | 2322054. 864 |
| M326T609_2 | 326. 1991723 | 609. 19  | 4899111. 238 |
| M326T617   | 326. 1991729 | 616. 891 | 5707369. 92  |
| M326T404   | 326. 2068273 | 403. 698 | 2495773. 004 |
| M327T87    | 326. 9012346 | 87. 426  | 13794296. 74 |
| M327T209   | 327. 0218365 | 209. 472 | 5997466. 221 |
| M327T318   | 327. 0709855 | 318. 232 | 1820963. 814 |
| M327T191_1 | 327. 0684459 | 191. 259 | 908515. 3638 |
| M327T439   | 327. 0693506 | 439. 27  | 1847799. 665 |
| M327T449   | 327. 0850181 | 448. 527 | 616283. 7319 |
| M327T84    | 327. 0918835 | 83. 9405 | 34009572. 21 |
| M327T179   | 327. 0918589 | 179. 046 | 5884941. 176 |
| M327T104   | 327. 0918993 | 104. 493 | 35771681. 25 |
| M327T95    | 327. 0917945 | 95. 2383 | 82479935. 43 |
| M327T157   | 327. 098646  | 156. 582 | 583959. 5437 |
| M327T373   | 327. 1073019 | 373. 196 | 1574477. 128 |
| M327T337   | 327. 1076555 | 336. 681 | 2227474. 774 |
| M327T766   | 327. 1126169 | 765. 588 | 2068336. 137 |
| M327T361   | 327. 1074724 | 360. 831 | 3542170. 352 |
| M327T476   | 327. 1096713 | 476. 451 | 667154. 3235 |
| M327T811   | 327. 1127223 | 811. 292 | 5537551. 862 |
| M327T798   | 327. 1124043 | 797. 757 | 6613223. 671 |
| M327T835   | 327. 1124321 | 835. 329 | 10706056. 1  |
| M327T784   | 327. 1160224 | 784. 051 | 5332111. 519 |

|            |              |          |              |
|------------|--------------|----------|--------------|
| M327T654   | 327. 1210931 | 653. 835 | 1499402. 504 |
| M327T106   | 327. 1305779 | 105. 537 | 4233821. 664 |
| M327T343   | 327. 1284074 | 342. 819 | 12031872. 88 |
| M327T191_2 | 327. 1282871 | 191. 259 | 6145067. 864 |
| M327T472   | 327. 1451103 | 471. 768 | 697236. 2164 |
| M327T504   | 327. 145224  | 504. 432 | 944994. 0137 |
| M327T569   | 327. 1437536 | 569. 091 | 1057863. 188 |
| M327T492   | 327. 1437772 | 491. 99  | 1952537. 093 |
| M327T632   | 327. 1785604 | 632. 288 | 2527136. 076 |
| M327T606   | 327. 1790248 | 606. 096 | 1415216. 455 |
| M327T506   | 327. 2026299 | 505. 99  | 866561. 5812 |
| M327T649   | 327. 2168805 | 649. 195 | 26620990. 78 |
| M327T741   | 327. 2168118 | 741. 077 | 28214776. 46 |
| M327T666   | 327. 2168414 | 666. 058 | 27076320. 05 |
| M327T594   | 327. 2168492 | 593. 841 | 59983337. 51 |
| M327T626   | 327. 2168722 | 626. 183 | 13300490. 68 |
| M327T611   | 327. 2167566 | 610. 742 | 12815911. 95 |
| M327T694   | 327. 2167839 | 694. 341 | 8232286. 569 |
| M327T796   | 327. 2105346 | 796. 202 | 11039639. 32 |
| M327T638   | 327. 2167442 | 638. 484 | 15237461. 04 |
| M328T385   | 327. 9882877 | 385. 225 | 915505. 4823 |
| M328T172   | 328. 0603861 | 171. 546 | 2037778. 26  |
| M328T191   | 328. 0602708 | 191. 259 | 3702665. 95  |
| M328T248   | 328. 066256  | 247. 773 | 1338460. 277 |
| M328T124   | 328. 0871389 | 123. 792 | 3003996. 96  |
| M328T173   | 328. 0873406 | 173. 092 | 2458272. 067 |
| M328T146   | 328. 08744   | 146. 08  | 3415528. 708 |
| M328T370   | 328. 1015842 | 370. 115 | 2512865. 768 |
| M328T98    | 328. 0957852 | 97. 682  | 7609170. 525 |
| M328T535   | 328. 1156056 | 535. 488 | 6000113. 457 |
| M328T217   | 328. 1155164 | 216. 95  | 2973412. 408 |
| M328T237   | 328. 1155732 | 236. 518 | 2234734. 752 |
| M328T825   | 328. 113124  | 824. 864 | 1006282. 678 |
| M328T835   | 328. 1137227 | 835. 329 | 1090488. 768 |
| M328T343   | 328. 1297696 | 342. 819 | 1354688. 211 |
| M328T391   | 328. 139272  | 391. 341 | 756453. 2383 |
| M328T321   | 328. 1394697 | 321. 312 | 5833375. 455 |
| M328T308   | 328. 1380819 | 307. 616 | 1988166. 786 |
| M328T349   | 328. 1490955 | 348. 668 | 2229862. 461 |
| M328T829   | 328. 1754087 | 829. 321 | 179165. 7211 |
| M328T601   | 328. 2197456 | 601. 473 | 5863194. 83  |
| M328T789   | 328. 2181134 | 788. 604 | 1836818. 115 |
| M328T649   | 328. 2199765 | 649. 195 | 5383406. 143 |
| M328T668   | 328. 2198916 | 667. 612 | 5456945. 715 |
| M328T594   | 328. 2198213 | 593. 841 | 11068177. 78 |
| M328T741   | 328. 2197036 | 741. 077 | 5182861. 372 |
| M328T626   | 328. 2199686 | 626. 183 | 2230951. 903 |
| M328T611   | 328. 2197919 | 610. 742 | 2306136. 708 |
| M328T694   | 328. 2198979 | 694. 341 | 1814927. 957 |
| M328T796   | 328. 2182434 | 796. 202 | 1745677. 887 |
| M328T638   | 328. 2196563 | 638. 484 | 2949628. 853 |
| M329T87    | 328. 897274  | 87. 426  | 3866461. 452 |
| M329T68    | 329. 0107128 | 67. 6441 | 980963. 6662 |
| M329T654   | 329. 027597  | 653. 835 | 1340581. 657 |

|            |              |          |              |
|------------|--------------|----------|--------------|
| M329T274   | 329. 0362651 | 273. 82  | 288684. 7139 |
| M329T626_1 | 329. 0349572 | 626. 183 | 1955122. 082 |
| M329T317   | 329. 0479865 | 316. 709 | 1601428. 106 |
| M329T182   | 329. 063092  | 182. 156 | 1221857. 825 |
| M329T124   | 329. 0631065 | 123. 792 | 2615399. 034 |
| M329T693   | 329. 0659509 | 692. 781 | 1293661. 699 |
| M329T109   | 329. 0631014 | 109. 475 | 1233121. 456 |
| M329T152   | 329. 0633573 | 152. 08  | 4814832. 948 |
| M329T191   | 329. 0631428 | 191. 259 | 718295. 4695 |
| M329T258   | 329. 0758409 | 258. 208 | 335462. 6838 |
| M329T347_1 | 329. 0831027 | 347. 166 | 82364215. 46 |
| M329T309   | 329. 091727  | 309. 091 | 1204736. 712 |
| M329T188   | 329. 0856924 | 188. 174 | 1854500. 832 |
| M329T164   | 329. 0856311 | 164. 077 | 3733920. 355 |
| M329T151   | 329. 0870575 | 150. 528 | 18998335. 66 |
| M329T137   | 329. 0871411 | 137. 226 | 16204832. 2  |
| M329T347_2 | 329. 0942921 | 347. 166 | 1382627. 089 |
| M329T580   | 329. 1033203 | 579. 883 | 234327. 9152 |
| M329T766   | 329. 1067318 | 765. 588 | 1099949. 98  |
| M329T91    | 329. 1096819 | 90. 9026 | 11400056. 51 |
| M329T415_1 | 329. 1227092 | 414. 571 | 1195526. 052 |
| M329T535   | 329. 1199626 | 535. 488 | 1413423. 189 |
| M329T503   | 329. 122544  | 502. 873 | 8149756. 039 |
| M329T415_2 | 329. 1339971 | 414. 571 | 645247. 05   |
| M329T605   | 329. 1367078 | 604. 606 | 1859034. 814 |
| M329T424   | 329. 1379968 | 423. 877 | 860238. 4353 |
| M329T321   | 329. 1445581 | 321. 312 | 712499. 7736 |
| M329T678   | 329. 1381482 | 678. 416 | 881572. 7368 |
| M329T690   | 329. 1381825 | 689. 75  | 390334. 7405 |
| M329T442   | 329. 1593368 | 442. 399 | 941187. 8231 |
| M329T672   | 329. 1577834 | 672. 229 | 1466789. 462 |
| M329T358   | 329. 1601108 | 357. 746 | 267110. 6706 |
| M329T546   | 329. 1961978 | 546. 308 | 306780. 3038 |
| M329T218   | 329. 2188897 | 218. 43  | 816339. 3697 |
| M329T601   | 329. 2252998 | 601. 473 | 979451. 2417 |
| M329T741   | 329. 2217463 | 741. 077 | 445240. 4192 |
| M329T626_2 | 329. 2210812 | 626. 183 | 12268939. 7  |
| M329T747   | 329. 2329775 | 747. 194 | 6073909. 132 |
| M329T661   | 329. 2330794 | 661. 453 | 24424002. 61 |
| M329T703   | 329. 2330456 | 702. 622 | 48634608. 82 |
| M329T669   | 329. 2317093 | 669. 12  | 68575136. 74 |
| M329T588   | 329. 2316221 | 587. 595 | 1877750. 113 |
| M329T761   | 329. 2331122 | 760. 976 | 1852276. 054 |
| M329T651   | 329. 231771  | 650. 74  | 14326268. 92 |
| M329T683   | 329. 2316839 | 682. 948 | 72637707. 77 |
| M329T732   | 329. 2330108 | 731. 793 | 12419209. 14 |
| M329T718   | 329. 2316282 | 717. 942 | 6861184. 394 |
| M329T626_3 | 329. 2331306 | 626. 183 | 694801260. 4 |
| M329T805   | 329. 2472447 | 805. 145 | 54943106. 52 |
| M329T835   | 329. 2472683 | 835. 329 | 4803693. 284 |
| M329T626_4 | 329. 4286903 | 626. 183 | 1964585. 529 |
| M330T425   | 330. 0485706 | 425. 439 | 1194668. 922 |
| M330T658   | 330. 0604415 | 658. 372 | 235921. 0412 |
| M330T151_1 | 330. 0662799 | 150. 528 | 1935101. 495 |

|            |              |          |              |
|------------|--------------|----------|--------------|
| M330T487   | 330. 0771684 | 487. 329 | 578560. 7555 |
| M330T428   | 330. 0820136 | 428. 448 | 229524. 7575 |
| M330T309   | 330. 0833582 | 309. 091 | 2079040. 157 |
| M330T347_1 | 330. 0893158 | 347. 166 | 7338486. 392 |
| M330T137   | 330. 0881958 | 137. 226 | 2425141. 446 |
| M330T197   | 330. 0953925 | 197. 335 | 842642. 8979 |
| M330T151_2 | 330. 0919768 | 150. 528 | 2473677. 957 |
| M330T147   | 330. 1029063 | 147. 455 | 1416618. 889 |
| M330T217   | 330. 1115018 | 216. 95  | 396685. 0865 |
| M330T203   | 330. 1187109 | 203. 346 | 311277. 9007 |
| M330T324   | 330. 11874   | 324. 413 | 12440165. 46 |
| M330T415   | 330. 1206866 | 414. 571 | 508535. 3495 |
| M330T526   | 330. 1454356 | 526. 124 | 665219. 7571 |
| M330T312   | 330. 1655205 | 312. 058 | 788775. 3316 |
| M330T172   | 330. 1657784 | 171. 546 | 1913583. 455 |
| M330T369   | 330. 2004238 | 368. 559 | 1818871. 956 |
| M330T347_2 | 330. 2051748 | 347. 166 | 929811. 4719 |
| M330T703   | 330. 2353751 | 702. 622 | 9350028. 332 |
| M330T669   | 330. 2353887 | 669. 12  | 13765427. 19 |
| M330T683   | 330. 2353768 | 682. 948 | 13903500. 55 |
| M330T626   | 330. 2354617 | 626. 183 | 136120603. 5 |
| M330T732   | 330. 2353494 | 731. 793 | 2213509. 357 |
| M330T805   | 330. 2510349 | 805. 145 | 13814778. 79 |
| M331T77    | 330. 8384094 | 77. 2263 | 35583234. 69 |
| M331T85    | 330. 9836989 | 85. 0169 | 1161782. 618 |
| M331T218   | 331. 0653091 | 218. 43  | 2263154. 976 |
| M331T320   | 331. 0665899 | 319. 785 | 10206333. 99 |
| M331T390   | 331. 0777193 | 389. 839 | 6637431. 407 |
| M331T353   | 331. 077606  | 353. 163 | 3200883. 866 |
| M331T338   | 331. 0778522 | 338. 222 | 4963970. 487 |
| M331T408   | 331. 0776281 | 408. 368 | 3351620. 972 |
| M331T364_1 | 331. 0776704 | 363. 928 | 2081617. 644 |
| M331T439   | 331. 0778212 | 439. 27  | 3716694. 092 |
| M331T394   | 331. 1022762 | 394. 467 | 2146392. 051 |
| M331T290   | 331. 1062036 | 289. 534 | 1796415. 337 |
| M331T326   | 331. 1052288 | 325. 901 | 1784043. 656 |
| M331T364_2 | 331. 1060406 | 363. 928 | 2377573. 084 |
| M331T169   | 331. 1036681 | 168. 507 | 1097787. 398 |
| M331T267   | 331. 1153622 | 267. 169 | 2141937. 062 |
| M331T205   | 331. 1134704 | 204. 895 | 2387862. 19  |
| M331T344   | 331. 1135474 | 344. 233 | 1231244. 595 |
| M331T318   | 331. 1158215 | 318. 232 | 2161805. 369 |
| M331T305   | 331. 1136795 | 304. 743 | 15838329. 61 |
| M331T196   | 331. 113568  | 195. 791 | 3373009. 749 |
| M331T545   | 331. 1193943 | 544. 759 | 1949442. 263 |
| M331T467   | 331. 1383821 | 467. 127 | 486760. 8986 |
| M331T352   | 331. 1479255 | 351. 663 | 255818. 807  |
| M331T643   | 331. 1535767 | 643. 166 | 6866384. 383 |
| M331T572   | 331. 1538687 | 572. 152 | 2010661. 082 |
| M331T535   | 331. 1751123 | 535. 488 | 3391018. 196 |
| M331T473   | 331. 175085  | 473. 329 | 1872197. 566 |
| M331T560   | 331. 1737354 | 560. 119 | 1438146. 636 |
| M331T387   | 331. 1826887 | 386. 78  | 1838254. 266 |
| M331T776   | 331. 1907979 | 776. 391 | 4491549. 02  |

|            |              |           |              |
|------------|--------------|-----------|--------------|
| M331T801   | 331. 1894    | 800. 683  | 3261965. 482 |
| M331T626   | 331. 2366898 | 626. 183  | 15112195. 72 |
| M331T614   | 331. 2445032 | 613. 824  | 3384282. 885 |
| M331T660   | 331. 2501576 | 659. 904  | 1643543. 183 |
| M331T651   | 331. 2465875 | 650. 74   | 3895018. 358 |
| M332T68_1  | 331. 9724674 | 67. 6441  | 3724903. 96  |
| M332T308   | 332. 042959  | 307. 616  | 1961125. 256 |
| M332T372   | 332. 0601204 | 371. 633  | 2509724. 717 |
| M332T487   | 332. 0706633 | 487. 329  | 173709. 5768 |
| M332T320   | 332. 0715391 | 319. 785  | 1354921. 412 |
| M332T391   | 332. 0790215 | 391. 341  | 975087. 7755 |
| M332T182   | 332. 0972757 | 182. 156  | 944273. 2484 |
| M332T317   | 332. 0975636 | 316. 709  | 2462414. 515 |
| M332T370   | 332. 0955484 | 370. 115  | 1489924. 422 |
| M332T237   | 332. 0973457 | 236. 518  | 670646. 8903 |
| M332T382   | 332. 095641  | 382. 171  | 900924. 5702 |
| M332T358   | 332. 095684  | 357. 746  | 1357824. 964 |
| M332T337   | 332. 1066417 | 336. 681  | 1161677. 484 |
| M332T410   | 332. 1094731 | 409. 881  | 1505052. 377 |
| M332T305   | 332. 1196071 | 304. 743  | 1995280. 626 |
| M332T329   | 332. 1346473 | 328. 999  | 4240941. 129 |
| M332T347   | 332. 1345068 | 347. 166  | 1550536. 467 |
| M332T535   | 332. 1705377 | 535. 488  | 1687180. 415 |
| M332T528   | 332. 1705681 | 527. 688  | 2011619. 084 |
| M332T626   | 332. 2424871 | 626. 183  | 1420506. 101 |
| M332T68_2  | 332. 4779923 | 67. 6441  | 727026. 9357 |
| M333T68    | 332. 9728561 | 67. 6441  | 271522. 2098 |
| M333T681   | 333. 0206634 | 681. 406  | 353182. 9076 |
| M333T77    | 333. 0291781 | 77. 2263  | 11217437. 73 |
| M333T376   | 333. 0381161 | 376. 15   | 836063. 09   |
| M333T545   | 333. 0493239 | 544. 759  | 3946006. 506 |
| M333T560   | 333. 0493566 | 560. 119  | 7454802. 547 |
| M333T606   | 333. 0493265 | 606. 096  | 19878236. 74 |
| M333T82    | 333. 0557382 | 81. 8855  | 38422227. 48 |
| M333T209_1 | 333. 0548846 | 209. 472  | 2036502. 78  |
| M333T349   | 333. 0825023 | 348. 668  | 25616968. 55 |
| M333T367   | 333. 0825182 | 367. 026  | 47730432. 23 |
| M333T391   | 333. 0824663 | 391. 341  | 7483179. 182 |
| M333T107   | 333. 0817396 | 106. 648  | 2045942. 877 |
| M333T317   | 333. 0824578 | 316. 709  | 8736066. 808 |
| M333T299   | 333. 0825307 | 298. 619  | 5901746. 301 |
| M333T340   | 333. 0824922 | 339. 772  | 18829363. 54 |
| M333T418   | 333. 0825717 | 417. 689  | 1646571. 839 |
| M333T209_2 | 333. 0911412 | 209. 472  | 3466458. 251 |
| M333T436   | 333. 0911849 | 436. 18   | 1244118. 065 |
| M333T372   | 333. 0971787 | 371. 633  | 13685773. 16 |
| M333T503   | 333. 0964323 | 502. 873  | 1181202. 049 |
| M333T275   | 333. 1056457 | 274. 794  | 482583. 6734 |
| M333T365   | 333. 1195844 | 365. 475  | 1449230. 124 |
| M333T270   | 333. 1293228 | 270. 0075 | 1055040. 349 |
| M333T238   | 333. 1286401 | 238. 024  | 49336069. 38 |
| M333T478   | 333. 1373011 | 477. 982  | 126747. 0262 |
| M333T444   | 333. 147515  | 443. 961  | 426157. 1182 |
| M333T458   | 333. 154596  | 457. 763  | 702816. 199  |

|            |              |          |              |
|------------|--------------|----------|--------------|
| M333T453   | 333. 1905848 | 453. 126 | 2169808. 811 |
| M333T721   | 333. 1905728 | 721. 058 | 508866. 5982 |
| M333T464   | 333. 1906254 | 464. 011 | 1060127. 53  |
| M333T770   | 333. 2064732 | 770. 235 | 1447100. 401 |
| M333T795   | 333. 2066158 | 794. 753 | 1593792. 239 |
| M333T781   | 333. 2063556 | 780. 958 | 1211476. 274 |
| M333T816   | 333. 2062647 | 815. 664 | 1422557. 038 |
| M333T758   | 333. 20659   | 757. 881 | 1178018. 907 |
| M333T726   | 333. 2065137 | 725. 713 | 767414. 8821 |
| M333T813   | 333. 2267482 | 812. 68  | 106326687. 6 |
| M334T67    | 333. 9612771 | 67. 1831 | 108454. 4453 |
| M334T91    | 334. 0776472 | 90. 9026 | 10260398. 04 |
| M334T419   | 334. 0775696 | 419. 237 | 1392667. 619 |
| M334T259   | 334. 0779964 | 259. 134 | 1407633. 84  |
| M334T367   | 334. 0849971 | 367. 026 | 5915282. 469 |
| M334T391   | 334. 0848636 | 391. 341 | 852649. 6787 |
| M334T288   | 334. 0879715 | 287. 981 | 290350. 745  |
| M334T179   | 334. 0879339 | 179. 046 | 1050510. 821 |
| M334T347   | 334. 0848939 | 347. 166 | 3351767. 358 |
| M334T372   | 334. 0966566 | 371. 633 | 1622392. 945 |
| M334T208   | 334. 1140599 | 207. 935 | 17207000. 22 |
| M334T293   | 334. 1140408 | 292. 621 | 6634706. 388 |
| M334T326   | 334. 1191132 | 325. 901 | 2188609. 055 |
| M334T175   | 334. 1234299 | 174. 576 | 614735. 6881 |
| M334T303   | 334. 1186519 | 303. 259 | 2025560. 422 |
| M334T238   | 334. 1325775 | 238. 024 | 6584623. 763 |
| M334T388   | 334. 1501307 | 388. 326 | 3852345. 564 |
| M334T353   | 334. 1857096 | 353. 163 | 190675. 3244 |
| M334T813   | 334. 2293717 | 812. 68  | 20628642. 48 |
| M335T83    | 335. 0614414 | 82. 8986 | 19308932. 41 |
| M335T353   | 335. 0733767 | 353. 163 | 2266813. 292 |
| M335T370   | 335. 0725594 | 370. 115 | 6045304. 561 |
| M335T500   | 335. 0763302 | 499. 759 | 2248812. 274 |
| M335T394   | 335. 0731011 | 394. 467 | 945032. 6125 |
| M335T367   | 335. 0913627 | 367. 026 | 1305862. 876 |
| M335T347   | 335. 0912048 | 347. 166 | 2111046. 058 |
| M335T335_1 | 335. 0964454 | 335. 153 | 6207822. 962 |
| M335T356   | 335. 0963605 | 356. 274 | 4239067. 027 |
| M335T85    | 335. 0965102 | 85. 0169 | 2976214. 393 |
| M335T200   | 335. 0984083 | 200. 362 | 1604005. 901 |
| M335T277   | 335. 1162119 | 276. 825 | 325239. 5253 |
| M335T272   | 335. 1160878 | 272. 312 | 522937. 7498 |
| M335T251   | 335. 1198898 | 251. 004 | 48624542. 61 |
| M335T294_1 | 335. 1197405 | 294. 152 | 2417274. 145 |
| M335T154   | 335. 119767  | 153. 601 | 1444770. 864 |
| M335T238   | 335. 1198814 | 238. 024 | 43522189. 81 |
| M335T199   | 335. 1198897 | 198. 821 | 66975794. 79 |
| M335T416   | 335. 1300227 | 416. 128 | 545591. 3278 |
| M335T335_2 | 335. 1341991 | 335. 153 | 2523254. 341 |
| M335T268   | 335. 1343599 | 267. 702 | 1578183. 466 |
| M335T358   | 335. 1342809 | 357. 746 | 2631286. 894 |
| M335T128   | 335. 1496374 | 128. 279 | 8466313. 829 |
| M335T341   | 335. 1478449 | 341. 266 | 2105336. 701 |
| M335T218   | 335. 148376  | 218. 43  | 2715567. 885 |



|            |              |          |              |
|------------|--------------|----------|--------------|
| M335T170   | 335. 1467413 | 170. 049 | 253269. 166  |
| M335T140   | 335. 156155  | 140. 209 | 9594912. 769 |
| M335T390   | 335. 1545931 | 389. 839 | 706076. 8449 |
| M335T294_2 | 335. 1563754 | 294. 152 | 1560861. 453 |
| M335T111   | 335. 1561586 | 110. 926 | 35769106. 21 |
| M335T152   | 335. 1563472 | 152. 08  | 4614086. 214 |
| M335T95    | 335. 1561058 | 95. 2383 | 83340708. 9  |
| M335T422   | 335. 1705395 | 422. 362 | 2023308. 752 |
| M335T438   | 335. 170744  | 437. 734 | 504239. 6085 |
| M335T813   | 335. 225143  | 812. 68  | 6299958. 472 |
| M336T293   | 336. 0553365 | 292. 621 | 1468048. 479 |
| M336T83    | 336. 0644286 | 82. 8986 | 2050406. 268 |
| M336T143   | 336. 0704304 | 143. 174 | 1453737. 067 |
| M336T408   | 336. 0845195 | 408. 368 | 144787. 742  |
| M336T193_1 | 336. 092243  | 192. 769 | 14079576. 15 |
| M336T155   | 336. 0921997 | 155. 033 | 8703832. 86  |
| M336T170   | 336. 0921862 | 170. 049 | 9703508. 556 |
| M336T332   | 336. 103539  | 332. 105 | 6522838. 361 |
| M336T133   | 336. 1024048 | 132. 707 | 1057773. 728 |
| M336T154   | 336. 1024237 | 153. 601 | 3258776. 457 |
| M336T169   | 336. 1038729 | 168. 507 | 7876392. 292 |
| M336T378   | 336. 1183421 | 377. 64  | 4541397. 282 |
| M336T387   | 336. 1184872 | 386. 78  | 2308339. 557 |
| M336T264   | 336. 1258239 | 263. 845 | 416149. 464  |
| M336T251   | 336. 1231396 | 251. 004 | 5298268. 307 |
| M336T217   | 336. 1217925 | 216. 95  | 1991623. 385 |
| M336T238   | 336. 1231489 | 238. 024 | 4956776. 59  |
| M336T433   | 336. 1300654 | 433. 06  | 649754. 3332 |
| M336T181   | 336. 1401326 | 180. 601 | 3781865. 685 |
| M336T270   | 336. 1368709 | 269. 798 | 246834. 099  |
| M336T193_2 | 336. 1402392 | 192. 769 | 4970849. 319 |
| M336T537   | 336. 1638058 | 537. 051 | 9408208. 158 |
| M336T117   | 336. 1601348 | 116. 52  | 4782384. 661 |
| M336T96    | 336. 1594758 | 96. 4922 | 9373249. 802 |
| M336T131   | 336. 1593676 | 131. 207 | 1320493. 845 |
| M336T393   | 336. 1688239 | 392. 905 | 291505. 1358 |
| M337T462   | 337. 0482704 | 462. 446 | 6511443. 758 |
| M337T240   | 337. 0431413 | 239. 574 | 358824. 3855 |
| M337T375   | 337. 0540138 | 374. 746 | 1018430. 626 |
| M337T436   | 337. 056005  | 436. 18  | 840100. 3265 |
| M337T687   | 337. 0760253 | 687. 214 | 372688. 8125 |
| M337T91    | 337. 076053  | 90. 9026 | 10859089. 93 |
| M337T294   | 337. 0775607 | 294. 152 | 424578. 0077 |
| M337T104   | 337. 0753805 | 104. 493 | 7180497. 569 |
| M337T82    | 337. 0862769 | 81. 8855 | 48016203. 22 |
| M337T193   | 337. 0939445 | 192. 769 | 1417716. 473 |
| M337T361   | 337. 092279  | 360. 831 | 15799835. 5  |
| M337T396   | 337. 0922909 | 396. 023 | 26636488. 13 |
| M337T372   | 337. 0923134 | 371. 633 | 24058108. 02 |
| M337T490   | 337. 0909021 | 490. 434 | 1584487. 662 |
| M337T554   | 337. 0968944 | 554. 027 | 2022343. 025 |
| M337T661   | 337. 1053608 | 661. 453 | 458324. 6102 |
| M337T318   | 337. 1040728 | 318. 232 | 346311. 5202 |
| M337T246   | 337. 1121225 | 246. 013 | 1991749. 682 |

|            |              |          |              |
|------------|--------------|----------|--------------|
| M337T334   | 337. 1131049 | 333. 655 | 3253306. 091 |
| M337T404   | 337. 1216909 | 403. 698 | 7208616. 885 |
| M337T352   | 337. 1243787 | 351. 663 | 1916198. 331 |
| M337T249   | 337. 1260398 | 249. 466 | 690264. 4203 |
| M337T520   | 337. 1283969 | 519. 998 | 396208. 3323 |
| M337T237   | 337. 1259796 | 236. 518 | 671239. 2166 |
| M337T411   | 337. 1493296 | 411. 444 | 1826606. 891 |
| M337T315   | 337. 1494759 | 315. 162 | 4285121. 402 |
| M337T425   | 337. 1495059 | 425. 439 | 1794356. 832 |
| M337T746   | 337. 164252  | 745. 747 | 11187808. 7  |
| M337T668   | 337. 1995418 | 667. 612 | 2020993. 831 |
| M337T808   | 337. 2008518 | 808. 251 | 1053508. 639 |
| M337T68    | 337. 4462573 | 67. 6441 | 1578784. 55  |
| M338T442   | 338. 027536  | 442. 399 | 10192585. 92 |
| M338T69    | 338. 0437874 | 69. 1983 | 2111758. 075 |
| M338T172   | 338. 0718327 | 171. 546 | 3898491. 475 |
| M338T200   | 338. 0717894 | 200. 362 | 10289314. 5  |
| M338T82    | 338. 0938837 | 81. 8855 | 5188560. 635 |
| M338T361   | 338. 0954397 | 360. 831 | 2479611. 339 |
| M338T372   | 338. 095445  | 371. 633 | 3592506. 283 |
| M338T394   | 338. 0967731 | 394. 467 | 5305302. 098 |
| M338T554   | 338. 0990808 | 554. 027 | 224070. 7982 |
| M338T91    | 338. 1084925 | 90. 9026 | 35069707. 84 |
| M338T178   | 338. 1085079 | 177. 649 | 1458244. 713 |
| M338T789   | 338. 1279284 | 788. 604 | 2221314. 649 |
| M338T447   | 338. 1230549 | 446. 967 | 666355. 8391 |
| M338T404   | 338. 1237117 | 403. 698 | 1080573. 203 |
| M338T332   | 338. 1321942 | 332. 105 | 868489. 7524 |
| M338T341   | 338. 1322075 | 341. 266 | 794143. 5844 |
| M338T179   | 338. 1550157 | 179. 046 | 573170. 4576 |
| M338T396   | 338. 172143  | 396. 023 | 1217319. 606 |
| M338T382   | 338. 1719542 | 382. 171 | 799730. 0663 |
| M338T470   | 338. 1962915 | 470. 253 | 588761. 6363 |
| M338T68    | 338. 4486503 | 67. 6441 | 81304. 73937 |
| M339T442   | 339. 0304154 | 442. 399 | 856207. 769  |
| M339T71    | 339. 048141  | 70. 607  | 580942. 8269 |
| M339T399   | 339. 0700904 | 399. 086 | 2784913. 097 |
| M339T334_1 | 339. 0733713 | 333. 655 | 779115. 9083 |
| M339T199   | 339. 0745312 | 198. 821 | 1045780. 732 |
| M339T835   | 339. 0798372 | 835. 329 | 15362563. 9  |
| M339T124   | 339. 0921229 | 123. 792 | 14129152. 04 |
| M339T106   | 339. 0921876 | 105. 537 | 50132276. 48 |
| M339T84    | 339. 0931497 | 83. 9405 | 6614168. 804 |
| M339T669   | 339. 0905722 | 669. 12  | 764750. 8148 |
| M339T172   | 339. 0922945 | 171. 546 | 2999044. 129 |
| M339T161   | 339. 0923942 | 161. 184 | 5019998. 339 |
| M339T92    | 339. 0911046 | 91. 9113 | 16006492. 94 |
| M339T146   | 339. 0955379 | 146. 08  | 15110670. 72 |
| M339T182   | 339. 1011464 | 182. 156 | 3070481. 647 |
| M339T294   | 339. 104104  | 294. 152 | 846496. 7981 |
| M339T373   | 339. 1070937 | 373. 196 | 1450091. 082 |
| M339T489   | 339. 1080534 | 488. 885 | 518778. 8929 |
| M339T385   | 339. 1073144 | 385. 225 | 1029852. 708 |
| M339T331   | 339. 1153379 | 330. 552 | 738093. 135  |

|            |              |          |              |
|------------|--------------|----------|--------------|
| M339T410   | 339. 1204315 | 409. 881 | 433591. 8747 |
| M339T421   | 339. 1245109 | 420. 799 | 223242. 0091 |
| M339T735   | 339. 1242943 | 734. 901 | 1545384. 183 |
| M339T323   | 339. 1292567 | 322. 862 | 3802208. 43  |
| M339T334_2 | 339. 1293227 | 333. 655 | 2356978. 353 |
| M339T312   | 339. 129183  | 312. 058 | 2421677. 107 |
| M339T415_1 | 339. 1562731 | 414. 571 | 1990165. 141 |
| M339T370   | 339. 1545571 | 370. 115 | 668527. 1291 |
| M339T424_1 | 339. 156083  | 423. 877 | 2604960. 356 |
| M339T455   | 339. 1604444 | 454. 645 | 866461. 8228 |
| M339T415_2 | 339. 1678098 | 414. 571 | 10494826. 35 |
| M339T424_2 | 339. 1678158 | 423. 877 | 13607341. 98 |
| M339T623   | 339. 1797366 | 623. 098 | 1467554. 713 |
| M339T790   | 339. 1812573 | 790. 161 | 8243474. 555 |
| M339T778   | 339. 1812959 | 777. 92  | 54384699. 33 |
| M339T762   | 339. 1812565 | 762. 482 | 4178874. 207 |
| M339T829   | 339. 197503  | 829. 321 | 17537383. 16 |
| M339T614   | 339. 2168011 | 613. 824 | 4323291. 427 |
| M339T632   | 339. 2166791 | 632. 288 | 6786020. 972 |
| M339T657   | 339. 2143767 | 656. 84  | 950799. 1708 |
| M340T441   | 340. 0253006 | 440. 833 | 1355878. 018 |
| M340T455   | 340. 0664254 | 454. 645 | 239769. 9032 |
| M340T290   | 340. 077416  | 289. 534 | 703646. 9406 |
| M340T221   | 340. 0865025 | 221. 453 | 1558619. 47  |
| M340T172   | 340. 0865036 | 171. 546 | 4355149. 428 |
| M340T206   | 340. 0865879 | 206. 399 | 1286118. 259 |
| M340T594_1 | 340. 0819993 | 593. 841 | 212206. 8222 |
| M340T320   | 340. 0871563 | 319. 785 | 1601081. 324 |
| M340T190   | 340. 0864295 | 189. 717 | 2606813. 33  |
| M340T147   | 340. 0900564 | 147. 455 | 1622045. 545 |
| M340T107   | 340. 0953259 | 106. 648 | 4555518. 459 |
| M340T296   | 340. 0880553 | 295. 704 | 4142362. 885 |
| M340T835   | 340. 0894722 | 835. 329 | 15629907. 62 |
| M340T427   | 340. 1014036 | 426. 913 | 3338498. 626 |
| M340T487   | 340. 1001251 | 487. 329 | 3341132. 879 |
| M340T352   | 340. 1103816 | 351. 663 | 640055. 5607 |
| M340T381   | 340. 1175101 | 380. 608 | 1641245. 467 |
| M340T249   | 340. 1234396 | 248. 622 | 5148784. 21  |
| M340T197   | 340. 1230794 | 197. 335 | 1212267. 193 |
| M340T424   | 340. 1187959 | 423. 877 | 718131. 7666 |
| M340T294   | 340. 1234277 | 294. 152 | 1647849. 079 |
| M340T95    | 340. 1237556 | 95. 2383 | 59783014. 91 |
| M340T497   | 340. 1393024 | 496. 646 | 268689. 7433 |
| M340T349   | 340. 1428002 | 348. 668 | 2363241. 744 |
| M340T399   | 340. 1415084 | 399. 086 | 678693. 5486 |
| M340T594_2 | 340. 1582627 | 593. 841 | 870161. 0189 |
| M340T526   | 340. 1757956 | 526. 124 | 2393332. 377 |
| M340T790   | 340. 1831851 | 790. 161 | 1423930. 648 |
| M340T778   | 340. 1832743 | 777. 92  | 10298282. 61 |
| M340T411   | 340. 1920455 | 411. 444 | 3241528. 602 |
| M340T632   | 340. 2181161 | 632. 288 | 1000585. 864 |
| M340T453   | 340. 2232618 | 453. 126 | 810452. 7919 |
| M341T90    | 341. 0252439 | 89. 8937 | 13784894. 86 |
| M341T209   | 341. 0274329 | 209. 472 | 907926. 361  |

|            |             |         |             |
|------------|-------------|---------|-------------|
| M341T181   | 341.0626432 | 180.601 | 3014330.84  |
| M341T315   | 341.0615258 | 315.162 | 1982736.267 |
| M341T350_1 | 341.0617354 | 350.108 | 1832918.067 |
| M341T197   | 341.0626824 | 197.335 | 7733323.443 |
| M341T781   | 341.0649179 | 780.958 | 7353266.105 |
| M341T294_1 | 341.0640934 | 294.152 | 6596652.96  |
| M341T151   | 341.0641567 | 150.528 | 1985719.367 |
| M341T337   | 341.0827764 | 336.681 | 5347144.942 |
| M341T193   | 341.0842899 | 192.769 | 574025.5686 |
| M341T299   | 341.0851655 | 298.619 | 5804201.652 |
| M341T398   | 341.0900935 | 397.585 | 1020760.675 |
| M341T432   | 341.0866763 | 431.507 | 1722358.286 |
| M341T350_2 | 341.0866803 | 350.108 | 1471549.46  |
| M341T422   | 341.0867396 | 422.362 | 2379436.926 |
| M341T362_1 | 341.0901682 | 362.384 | 1243645.754 |
| M341T492   | 341.0888515 | 491.99  | 4141096.63  |
| M341T146_1 | 341.0906461 | 146.08  | 2901063.36  |
| M341T238   | 341.0866772 | 238.024 | 1341147.524 |
| M341T306   | 341.1059795 | 306.164 | 3978429.871 |
| M341T706   | 341.1011993 | 705.593 | 4025259.893 |
| M341T205   | 341.106075  | 204.895 | 3713435.921 |
| M341T269   | 341.1060892 | 269.337 | 2288657.005 |
| M341T427   | 341.1023032 | 426.913 | 1091351.051 |
| M341T314   | 341.1024514 | 313.612 | 2958512.431 |
| M341T776   | 341.106231  | 776.391 | 22270427.93 |
| M341T172   | 341.1060693 | 171.546 | 11910870.05 |
| M341T838   | 341.1016166 | 838.314 | 140904875.9 |
| M341T384   | 341.1031825 | 383.727 | 1577751.91  |
| M341T416   | 341.1022096 | 416.128 | 1266408.072 |
| M341T444   | 341.1059345 | 443.961 | 718353.4865 |
| M341T83    | 341.1059816 | 82.8986 | 13501264.45 |
| M341T256   | 341.1060622 | 255.831 | 3299254.672 |
| M341T278   | 341.1060436 | 278.267 | 1820861.056 |
| M341T726   | 341.1012722 | 725.713 | 8622055.684 |
| M341T362_2 | 341.1021536 | 362.384 | 1580254.476 |
| M341T402   | 341.1024141 | 402.144 | 1036371.689 |
| M341T190   | 341.106039  | 189.717 | 7261782.564 |
| M341T146_2 | 341.1023857 | 146.08  | 34401324.46 |
| M341T490   | 341.107578  | 490.434 | 1775550.758 |
| M341T334   | 341.1027831 | 333.655 | 3541279.78  |
| M341T249   | 341.110334  | 249.466 | 1966477.22  |
| M341T102   | 341.1105032 | 101.563 | 2736075541  |
| M341T353   | 341.1130357 | 353.163 | 1064744.129 |
| M341T94    | 341.1104878 | 94.1615 | 4164134527  |
| M341T224   | 341.1128613 | 224.484 | 3599589.876 |
| M341T241   | 341.110396  | 240.733 | 2203726.132 |
| M341T549   | 341.1098537 | 549.371 | 827604.184  |
| M341T294_2 | 341.110438  | 294.152 | 6797228.426 |
| M341T121   | 341.1158928 | 120.945 | 79927069.93 |
| M341T364   | 341.1126045 | 363.928 | 826908.0099 |
| M341T459   | 341.1225556 | 459.324 | 799781.5592 |
| M341T146_3 | 341.1127736 | 146.08  | 33938421.62 |
| M341T248   | 341.1267175 | 247.773 | 160347.9465 |
| M341T540   | 341.1254223 | 540.152 | 865257.289  |

|            |              |          |              |
|------------|--------------|----------|--------------|
| M341T376   | 341. 1239718 | 376. 15  | 2237049. 828 |
| M341T394   | 341. 1238042 | 394. 467 | 1760524. 353 |
| M341T744   | 341. 1355018 | 744. 192 | 1804345. 739 |
| M341T294_3 | 341. 1350474 | 294. 152 | 334949. 1989 |
| M341T769   | 341. 1412515 | 768. 696 | 15506748. 86 |
| M341T813   | 341. 1413039 | 812. 68  | 4405284. 178 |
| M341T723   | 341. 1410771 | 722. 604 | 5421688. 771 |
| M341T831_1 | 341. 1411108 | 830. 813 | 4013023. 896 |
| M341T318   | 341. 144664  | 318. 232 | 1656575. 592 |
| M341T712   | 341. 1411078 | 711. 794 | 15387499. 49 |
| M341T407   | 341. 1432192 | 406. 813 | 17995343. 16 |
| M341T154   | 341. 146612  | 153. 601 | 946722. 7312 |
| M341T537   | 341. 1578603 | 537. 051 | 316214. 3586 |
| M341T424   | 341. 1723812 | 423. 877 | 317293. 583  |
| M341T526   | 341. 1799218 | 526. 124 | 263701. 7028 |
| M341T411   | 341. 1897966 | 411. 444 | 997699. 2708 |
| M341T779   | 341. 1896719 | 779. 407 | 2317549. 792 |
| M341T625   | 341. 197178  | 624. 642 | 3073226. 063 |
| M341T831_2 | 341. 1938288 | 830. 813 | 1197570. 923 |
| M341T520   | 341. 1957696 | 519. 998 | 2344267. 065 |
| M341T766   | 341. 1956619 | 765. 588 | 26391473. 73 |
| M341T500   | 341. 1956788 | 499. 759 | 1306465. 518 |
| M341T546   | 341. 1971606 | 546. 308 | 3767207. 222 |
| M341T532   | 341. 197111  | 532. 372 | 2389519. 749 |
| M341T753   | 341. 195616  | 753. 315 | 58569168. 37 |
| M341T564   | 341. 1974106 | 564. 487 | 4759041. 843 |
| M341T770   | 341. 2329336 | 770. 235 | 933293. 8354 |
| M341T716   | 341. 2322383 | 716. 391 | 387892. 7855 |
| M341T784   | 341. 2315092 | 784. 051 | 946242. 3147 |
| M342T338   | 342. 0213015 | 338. 222 | 380014. 2852 |
| M342T358   | 342. 0423921 | 357. 746 | 961271. 4039 |
| M342T68    | 342. 0429534 | 67. 6441 | 86583. 69957 |
| M342T122   | 342. 0662895 | 122. 381 | 6091142. 766 |
| M342T197   | 342. 066266  | 197. 335 | 1312910. 266 |
| M342T206   | 342. 0648932 | 206. 399 | 1019156. 136 |
| M342T781   | 342. 0669582 | 780. 958 | 1294267. 988 |
| M342T175   | 342. 0648947 | 174. 576 | 6031697. 998 |
| M342T296   | 342. 0662385 | 295. 704 | 1276146. 296 |
| M342T147   | 342. 0684372 | 147. 455 | 7450936. 946 |
| M342T299   | 342. 0902806 | 298. 619 | 853801. 5579 |
| M342T439   | 342. 0838861 | 439. 27  | 10228121. 12 |
| M342T387   | 342. 0920163 | 386. 78  | 386368. 8226 |
| M342T300   | 342. 1030315 | 300. 176 | 364657. 636  |
| M342T726   | 342. 1029897 | 725. 713 | 1436493. 905 |
| M342T145   | 342. 1119299 | 144. 706 | 26411927. 4  |
| M342T102   | 342. 1105334 | 101. 563 | 406562095. 4 |
| M342T94    | 342. 1104988 | 94. 1615 | 625195988. 3 |
| M342T838   | 342. 1091356 | 838. 314 | 20323105. 16 |
| M342T375   | 342. 1196715 | 374. 746 | 1843531. 033 |
| M342T399   | 342. 1194066 | 399. 086 | 2029505      |
| M342T362   | 342. 1194641 | 362. 384 | 1548892. 016 |
| M342T200   | 342. 1196258 | 200. 362 | 33726629. 1  |
| M342T146   | 342. 1235209 | 146. 08  | 2635954. 621 |
| M342T318   | 342. 1297898 | 318. 232 | 4035747. 305 |

|           |              |          |              |
|-----------|--------------|----------|--------------|
| M342T185  | 342. 1284954 | 185. 252 | 942296. 3959 |
| M342T334  | 342. 1299891 | 333. 655 | 1685125. 25  |
| M342T769  | 342. 1421764 | 768. 696 | 2940055. 633 |
| M342T712  | 342. 1413481 | 711. 794 | 3298450. 202 |
| M342T736  | 342. 1535553 | 736. 458 | 6688962. 283 |
| M342T407  | 342. 1531411 | 406. 813 | 2163168. 023 |
| M342T356  | 342. 1658544 | 356. 274 | 2312047. 908 |
| M343T86_1 | 342. 9131069 | 86. 3396 | 1295602. 611 |
| M343T31   | 342. 9978691 | 31. 4228 | 140646. 001  |
| M343T86_2 | 343. 0011971 | 86. 3396 | 1461317. 678 |
| M343T305  | 343. 0623355 | 304. 743 | 568394. 4959 |
| M343T294  | 343. 0602275 | 294. 152 | 1829410. 477 |
| M343T191  | 343. 0665223 | 191. 259 | 337511. 7796 |
| M343T770  | 343. 0790574 | 770. 235 | 1537474. 935 |
| M343T337  | 343. 0786518 | 336. 681 | 695276. 6375 |
| M343T456  | 343. 0878772 | 456. 2   | 629664. 9612 |
| M343T439  | 343. 0877101 | 439. 27  | 1108366. 053 |
| M343T317  | 343. 1029271 | 316. 709 | 1701613. 352 |
| M343T382  | 343. 1029762 | 382. 171 | 4373512. 913 |
| M343T418  | 343. 1029448 | 417. 689 | 1162000. 762 |
| M343T240  | 343. 1030858 | 239. 574 | 1438260. 869 |
| M343T245  | 343. 1157012 | 245. 353 | 1040181. 566 |
| M343T291  | 343. 1120102 | 291. 076 | 326390. 4247 |
| M343T102  | 343. 111807  | 101. 563 | 98997419. 22 |
| M343T94   | 343. 1119662 | 94. 1615 | 110004414. 7 |
| M343T303  | 343. 116237  | 303. 259 | 509509. 463  |
| M343T107  | 343. 123231  | 106. 648 | 14386152. 19 |
| M343T202  | 343. 1226625 | 201. 897 | 5730348. 16  |
| M343T158  | 343. 1253953 | 158. 1   | 2564029. 828 |
| M343T146  | 343. 123341  | 146. 08  | 6868912. 094 |
| M343T96   | 343. 1233159 | 96. 4922 | 16575893. 46 |
| M343T318  | 343. 1321687 | 318. 232 | 405671. 8061 |
| M343T453  | 343. 1390765 | 453. 126 | 1063635. 571 |
| M343T385  | 343. 1390528 | 385. 225 | 1554860. 508 |
| M343T552  | 343. 1412518 | 552. 493 | 537826. 5747 |
| M343T466  | 343. 1523724 | 465. 575 | 616973. 6946 |
| M343T732  | 343. 1535056 | 731. 793 | 5629731. 81  |
| M343T663  | 343. 1564754 | 663. 008 | 3279183. 968 |
| M343T398  | 343. 1947328 | 397. 585 | 1269724. 422 |
| M343T706  | 343. 2115063 | 705. 593 | 4724980. 999 |
| M343T535  | 343. 2114523 | 535. 488 | 5150378. 287 |
| M343T715  | 343. 2098278 | 714. 841 | 1663659. 459 |
| M343T563  | 343. 2114908 | 562. 946 | 6688925. 804 |
| M343T258  | 343. 2084498 | 258. 208 | 350961. 2788 |
| M343T492  | 343. 2144016 | 491. 99  | 12658825. 7  |
| M343T816  | 343. 2477563 | 815. 664 | 7814788. 288 |
| M344T359  | 344. 0289853 | 359. 297 | 3419848. 703 |
| M344T206  | 344. 0376551 | 206. 399 | 16617315. 44 |
| M344T391  | 344. 0615663 | 391. 341 | 1098229. 601 |
| M344T68   | 344. 0649836 | 67. 6441 | 273472. 4445 |
| M344T122  | 344. 0829303 | 122. 381 | 8197317. 813 |
| M344T179  | 344. 0830179 | 179. 046 | 11238519. 76 |
| M344T142  | 344. 0829739 | 141. 655 | 3720449. 847 |
| M344T161  | 344. 0816787 | 161. 184 | 4383276. 953 |

|            |             |         |             |
|------------|-------------|---------|-------------|
| M344T108   | 344.0829756 | 108.082 | 8607445.311 |
| M344T199   | 344.0829682 | 198.821 | 2514249.786 |
| M344T321   | 344.0981032 | 321.312 | 2307387.013 |
| M344T308   | 344.0966731 | 307.616 | 853501.6454 |
| M344T294_1 | 344.0967067 | 294.152 | 2221413.759 |
| M344T92    | 344.1000699 | 91.9113 | 7389035.814 |
| M344T381   | 344.1068093 | 380.608 | 488390.7124 |
| M344T102   | 344.1148498 | 101.563 | 8095611.764 |
| M344T95    | 344.1148488 | 95.2383 | 9458780.106 |
| M344T476   | 344.1151264 | 476.451 | 381715.0241 |
| M344T181   | 344.1167167 | 180.601 | 1435566.742 |
| M344T294_2 | 344.117136  | 294.152 | 1014467.898 |
| M344T190   | 344.1167365 | 189.717 | 1642732.3   |
| M344T314   | 344.1295922 | 313.612 | 3686372.586 |
| M344T347   | 344.1333124 | 347.166 | 1683997.332 |
| M344T332   | 344.1450451 | 332.105 | 1602289.247 |
| M344T358   | 344.1841149 | 357.746 | 2043685.786 |
| M344T432   | 344.220214  | 431.507 | 571255.3867 |
| M345T523   | 345.0421957 | 523.055 | 2201458.124 |
| M345T428   | 345.0390753 | 428.448 | 226440.9278 |
| M345T122   | 345.0581707 | 122.381 | 912917.9472 |
| M345T246   | 345.0553819 | 246.474 | 1521408.918 |
| M345T271   | 345.056042  | 270.88  | 713191.8501 |
| M345T309   | 345.07712   | 309.091 | 2339866.347 |
| M345T391   | 345.0810624 | 391.341 | 6259808.632 |
| M345T181   | 345.0844776 | 180.601 | 783093.3494 |
| M345T329   | 345.0916602 | 328.999 | 1401688.235 |
| M345T545_1 | 345.0975491 | 544.759 | 1149700.165 |
| M345T447   | 345.095413  | 446.967 | 1489435.08  |
| M345T591   | 345.1039301 | 590.717 | 5207552.777 |
| M345T432   | 345.1171281 | 431.507 | 1924986.419 |
| M345T399   | 345.1175137 | 399.086 | 6572433.332 |
| M345T344   | 345.1173283 | 344.233 | 601004.1514 |
| M345T509   | 345.1176488 | 509.11  | 3821218.426 |
| M345T315   | 345.1278958 | 315.162 | 567867.4622 |
| M345T535   | 345.1327815 | 535.488 | 1526317.405 |
| M345T559   | 345.1368406 | 558.574 | 920984.5576 |
| M345T498   | 345.1501722 | 498.202 | 469326.399  |
| M345T515   | 345.1497036 | 515.338 | 403004.503  |
| M345T455   | 345.1556089 | 454.645 | 3246937.627 |
| M345T435   | 345.1539846 | 434.617 | 25877020.09 |
| M345T472   | 345.155397  | 471.768 | 754146.0641 |
| M345T415   | 345.1540146 | 414.571 | 3770691.039 |
| M345T381   | 345.1541771 | 380.608 | 1098364.402 |
| M345T355   | 345.1638112 | 354.719 | 387290.1316 |
| M345T790   | 345.167689  | 790.161 | 3310737.905 |
| M345T700   | 345.1676908 | 699.592 | 3339542.725 |
| M345T804   | 345.1753287 | 803.615 | 841534.4709 |
| M345T240   | 345.176723  | 239.574 | 1445057.164 |
| M345T756   | 345.1820704 | 756.343 | 1035238.137 |
| M345T822   | 345.1819141 | 821.831 | 1310351.03  |
| M345T778   | 345.1813784 | 777.92  | 1108562.45  |
| M345T617   | 345.2221658 | 616.891 | 3374804.414 |
| M345T545_2 | 345.2270609 | 544.759 | 12113822.74 |

|            |              |           |              |
|------------|--------------|-----------|--------------|
| M345T598   | 345. 2269532 | 598. 341  | 2893633. 757 |
| M345T473   | 345. 2270859 | 473. 329  | 1864084. 822 |
| M345T635   | 345. 2290331 | 635. 37   | 8111234. 946 |
| M345T563   | 345. 2271409 | 562. 946  | 7989298. 623 |
| M345T508   | 345. 2269673 | 507. 55   | 3130261. 647 |
| M345T531   | 345. 2269719 | 530. 804  | 8375736. 72  |
| M346T86    | 346. 0151811 | 86. 3396  | 4843362. 98  |
| M346T247   | 346. 0550888 | 246. 7565 | 1156564. 245 |
| M346T381   | 346. 0771514 | 380. 608  | 1532758. 97  |
| M346T179   | 346. 1123359 | 179. 046  | 4880422. 597 |
| M346T308   | 346. 1124984 | 307. 616  | 2208498. 701 |
| M346T407   | 346. 1123906 | 406. 813  | 1881571. 029 |
| M346T503   | 346. 1123594 | 502. 873  | 549007. 0653 |
| M346T358   | 346. 1474094 | 357. 746  | 5913778. 54  |
| M346T495   | 346. 1489218 | 495. 125  | 692179. 294  |
| M346T611   | 346. 15057   | 610. 742  | 404318. 4855 |
| M346T435   | 346. 1589481 | 434. 617  | 3865372. 119 |
| M346T197   | 346. 1633278 | 197. 335  | 1327370. 552 |
| M346T790   | 346. 1726848 | 790. 161  | 535895. 507  |
| M346T700   | 346. 1734769 | 699. 592  | 735886. 5599 |
| M346T559   | 346. 2299638 | 558. 574  | 1086798. 921 |
| M346T615   | 346. 2300767 | 615. 38   | 508965. 3883 |
| M346T635   | 346. 2299662 | 635. 37   | 1126526. 793 |
| M346T68    | 346. 4507237 | 67. 6441  | 1144608. 313 |
| M347T67    | 346. 9530826 | 67. 1831  | 209805. 6089 |
| M347T72    | 347. 0609554 | 72. 0941  | 152195316. 9 |
| M347T353   | 347. 0718426 | 353. 163  | 1186520. 186 |
| M347T107   | 347. 0731213 | 106. 648  | 2325554. 267 |
| M347T450   | 347. 0760705 | 450. 052  | 609022. 6965 |
| M347T329   | 347. 0978812 | 328. 999  | 11246241. 18 |
| M347T84    | 347. 0983667 | 83. 9405  | 11096305. 23 |
| M347T337   | 347. 0982669 | 336. 681  | 9703442. 266 |
| M347T290   | 347. 1087176 | 289. 534  | 412667. 5915 |
| M347T528   | 347. 1112844 | 527. 688  | 864761. 2276 |
| M347T453   | 347. 1223774 | 453. 126  | 2081006. 957 |
| M347T416   | 347. 1225568 | 416. 128  | 1610030. 473 |
| M347T577   | 347. 1221018 | 576. 787  | 461341. 9339 |
| M347T643   | 347. 1245536 | 643. 166  | 375867. 6569 |
| M347T404   | 347. 13372   | 403. 698  | 845810. 5253 |
| M347T385   | 347. 1344812 | 385. 225  | 464757. 8157 |
| M347T532   | 347. 1483712 | 532. 372  | 21185277. 42 |
| M347T557   | 347. 1552253 | 557. 078  | 2847739. 461 |
| M347T433   | 347. 1642448 | 433. 06   | 7849541. 991 |
| M347T456   | 347. 1697361 | 456. 2    | 5105283. 844 |
| M347T486   | 347. 1697813 | 485. 784  | 1179313. 959 |
| M347T640   | 347. 1851474 | 640. 057  | 666810. 6937 |
| M347T787   | 347. 1974721 | 787. 078  | 16025024. 44 |
| M347T805   | 347. 19576   | 805. 145  | 14171280. 33 |
| M347T514   | 347. 2434215 | 513. 768  | 228643. 5624 |
| M348T452_1 | 347. 6803047 | 451. 616  | 216338. 9117 |
| M348T231   | 348. 0495962 | 230. 507  | 853397. 997  |
| M348T329_1 | 348. 0557688 | 328. 999  | 1249102. 796 |
| M348T182   | 348. 0556436 | 182. 156  | 410739. 8103 |
| M348T253   | 348. 0557138 | 252. 703  | 370839. 401  |



|            |             |         |             |
|------------|-------------|---------|-------------|
| M348T260   | 348.0549116 | 259.983 | 402470.7481 |
| M348T72    | 348.0622435 | 72.0941 | 20819116.25 |
| M348T364   | 348.0717332 | 363.928 | 246040.5541 |
| M348T326   | 348.0906774 | 325.901 | 606874.1309 |
| M348T269   | 348.1042327 | 269.291 | 5569828.491 |
| M348T291   | 348.1014892 | 291.076 | 3064433.187 |
| M348T337   | 348.102338  | 336.681 | 1683510.061 |
| M348T205   | 348.1036214 | 204.895 | 2690961.869 |
| M348T318   | 348.1033811 | 318.232 | 2072371.822 |
| M348T196   | 348.103438  | 195.791 | 3448484.629 |
| M348T329_2 | 348.1021462 | 328.999 | 2711993.199 |
| M348T302   | 348.1057035 | 301.725 | 5012878.9   |
| M348T347   | 348.1056127 | 347.166 | 1415012.436 |
| M348T388_1 | 348.1147006 | 388.326 | 1253279.349 |
| M348T419   | 348.1142932 | 419.237 | 1016717.52  |
| M348T452_2 | 348.1145629 | 451.616 | 393916.5758 |
| M348T575   | 348.1172793 | 575.222 | 1689392.21  |
| M348T299   | 348.1274691 | 298.619 | 7129071.904 |
| M348T402   | 348.1272738 | 402.144 | 693663.7557 |
| M348T388_2 | 348.125405  | 388.326 | 1355517.071 |
| M348T185   | 348.1287601 | 185.252 | 1698290.433 |
| M348T428   | 348.1288469 | 428.448 | 812780.9417 |
| M348T532   | 348.1500929 | 532.372 | 3452644.427 |
| M348T407   | 348.1563226 | 406.813 | 723809.7171 |
| M348T466   | 348.1649275 | 465.575 | 2161154.035 |
| M348T399   | 348.1688469 | 399.086 | 4448472.887 |
| M348T534   | 348.1658207 | 533.931 | 3872706.901 |
| M348T787   | 348.2013925 | 787.078 | 3017081.327 |
| M348T807   | 348.2012455 | 806.698 | 2036063.876 |
| M349T740   | 348.9017943 | 739.509 | 9411234.244 |
| M349T753   | 348.9012799 | 753.315 | 1866949.526 |
| M349T65    | 348.9969477 | 65.4825 | 92365.62389 |
| M349T68    | 349.0508841 | 67.6441 | 227221.2025 |
| M349T408   | 349.0639229 | 408.368 | 141481.1562 |
| M349T106   | 349.0794876 | 105.537 | 3257851.781 |
| M349T294   | 349.0763856 | 294.152 | 892833.4013 |
| M349T182   | 349.0871481 | 182.156 | 8129846.468 |
| M349T146_1 | 349.0872264 | 146.08  | 4964830.537 |
| M349T369   | 349.0886551 | 368.559 | 6000250.041 |
| M349T293   | 349.0870176 | 292.621 | 8380456.511 |
| M349T337   | 349.0886428 | 336.681 | 8995567.872 |
| M349T347   | 349.0887321 | 347.166 | 14281736.63 |
| M349T387   | 349.0886721 | 386.78  | 8534964.109 |
| M349T323   | 349.0886734 | 322.862 | 8197999.21  |
| M349T268   | 349.1058758 | 268.419 | 940298.0296 |
| M349T356   | 349.1142528 | 356.274 | 1236193.668 |
| M349T379   | 349.1134849 | 379.066 | 3961502.898 |
| M349T312   | 349.110909  | 312.058 | 1479116.633 |
| M349T122   | 349.1199549 | 122.381 | 8229163.071 |
| M349T107   | 349.1196809 | 106.648 | 76331583.09 |
| M349T146_2 | 349.1197318 | 146.08  | 58330885.47 |
| M349T338_1 | 349.1377216 | 338.222 | 1144633.642 |
| M349T338_2 | 349.1536561 | 338.222 | 1153105.873 |
| M349T446   | 349.1491086 | 445.522 | 1529810.908 |

|            |              |          |              |
|------------|--------------|----------|--------------|
| M349T407   | 349. 1490257 | 406. 813 | 5809779. 493 |
| M349T311   | 349. 1592577 | 310. 626 | 2653165. 053 |
| M349T355   | 349. 1630152 | 354. 719 | 13985095. 65 |
| M349T528   | 349. 1640763 | 527. 688 | 301218. 8225 |
| M349T464   | 349. 1867715 | 464. 011 | 2058273. 18  |
| M349T419   | 349. 1865225 | 419. 237 | 1456637. 254 |
| M349T439   | 349. 1867855 | 439. 27  | 794996. 4298 |
| M349T743   | 349. 200244  | 742. 631 | 4216218. 925 |
| M349T795   | 349. 194718  | 794. 753 | 1474405. 864 |
| M349T805   | 349. 194941  | 805. 145 | 3100106. 626 |
| M349T786   | 349. 1945789 | 785. 593 | 2336390. 505 |
| M349T718   | 349. 2003102 | 717. 942 | 3728413. 673 |
| M349T643   | 349. 2007548 | 643. 166 | 1698725. 6   |
| M349T669   | 349. 2009961 | 669. 12  | 2790472. 297 |
| M349T572   | 349. 2010609 | 572. 152 | 816849. 9519 |
| M349T489   | 349. 2008168 | 488. 885 | 813564. 7896 |
| M350T740   | 349. 8998111 | 739. 509 | 1099122. 036 |
| M350T601   | 350. 0372644 | 601. 473 | 43178627. 08 |
| M350T557   | 350. 038813  | 557. 078 | 6179904. 006 |
| M350T484   | 350. 0387518 | 484. 221 | 820318. 8447 |
| M350T518   | 350. 0388687 | 518. 474 | 9736405. 672 |
| M350T492   | 350. 0387096 | 491. 99  | 1490021. 441 |
| M350T548   | 350. 038856  | 547. 805 | 9086139. 294 |
| M350T501   | 350. 0373518 | 501. 318 | 2189904. 386 |
| M350T835_1 | 350. 0380566 | 835. 329 | 586698. 575  |
| M350T87    | 350. 0449826 | 87. 426  | 9852295. 411 |
| M350T349_1 | 350. 0698439 | 348. 668 | 10254029. 06 |
| M350T369_1 | 350. 0698498 | 368. 559 | 27280528. 6  |
| M350T442   | 350. 0668984 | 442. 399 | 251687. 5388 |
| M350T341   | 350. 069844  | 341. 266 | 9396765. 859 |
| M350T314   | 350. 0699292 | 313. 612 | 6524333. 818 |
| M350T381   | 350. 0698834 | 380. 608 | 8382121. 549 |
| M350T152   | 350. 0696339 | 152. 08  | 3635490. 455 |
| M350T402   | 350. 0699569 | 402. 144 | 3136242. 896 |
| M350T418   | 350. 0698476 | 417. 689 | 3194015. 139 |
| M350T433   | 350. 0752361 | 433. 06  | 482686. 6499 |
| M350T349_2 | 350. 0893207 | 348. 668 | 1975629. 701 |
| M350T286   | 350. 0870783 | 286. 433 | 1111338. 263 |
| M350T106   | 350. 110064  | 105. 537 | 7738500. 675 |
| M350T293   | 350. 1097518 | 292. 621 | 1523012. 674 |
| M350T175   | 350. 1148446 | 174. 576 | 6163116. 07  |
| M350T241   | 350. 1094394 | 240. 733 | 1969763. 465 |
| M350T297   | 350. 1210349 | 297. 149 | 1192953. 845 |
| M350T288   | 350. 1210716 | 287. 981 | 1397851. 301 |
| M350T271   | 350. 1210489 | 270. 519 | 5418047. 84  |
| M350T238   | 350. 1203457 | 238. 024 | 64256234. 74 |
| M350T320   | 350. 1350389 | 319. 785 | 915630. 8387 |
| M350T390   | 350. 1428849 | 389. 839 | 1310384. 864 |
| M350T369_2 | 350. 1462082 | 368. 559 | 770544. 5401 |
| M350T338   | 350. 1459313 | 338. 222 | 972539. 2481 |
| M350T355   | 350. 1635073 | 354. 719 | 1765949. 102 |
| M350T411   | 350. 1677669 | 411. 444 | 1716907. 619 |
| M350T398   | 350. 1745906 | 397. 585 | 1576818. 39  |
| M350T452   | 350. 1824584 | 451. 616 | 446500. 8106 |

|            |              |          |              |
|------------|--------------|----------|--------------|
| M350T718   | 350. 2042709 | 717. 942 | 695199. 2257 |
| M350T574   | 350. 2051326 | 573. 704 | 152384. 3684 |
| M350T643   | 350. 2152499 | 643. 166 | 130546. 1538 |
| M350T835_2 | 350. 2672586 | 835. 329 | 1839266. 287 |
| M351T740   | 350. 8929332 | 739. 509 | 12012110. 33 |
| M351T753   | 350. 8929859 | 753. 315 | 2378850. 686 |
| M351T69    | 350. 9233196 | 69. 1983 | 871689. 7427 |
| M351T86    | 351. 0322633 | 86. 3396 | 1482078. 02  |
| M351T583   | 351. 0410268 | 582. 96  | 1857500. 048 |
| M351T611   | 351. 0387456 | 610. 742 | 2025195. 017 |
| M351T569   | 351. 0409809 | 569. 091 | 1079106. 504 |
| M351T592   | 351. 0412874 | 592. 284 | 1315786. 515 |
| M351T83    | 351. 0541131 | 82. 8986 | 11303400. 6  |
| M351T369   | 351. 0737787 | 368. 559 | 3173894. 876 |
| M351T551   | 351. 0751219 | 550. 932 | 535393. 6321 |
| M351T349   | 351. 0765186 | 348. 668 | 1286449. 869 |
| M351T341   | 351. 0765814 | 341. 266 | 1338548. 506 |
| M351T382   | 351. 0769679 | 382. 171 | 1014788. 166 |
| M351T367   | 351. 0895972 | 367. 026 | 1765508. 514 |
| M351T107   | 351. 0915474 | 106. 648 | 15227044     |
| M351T179   | 351. 0909651 | 179. 046 | 6798342. 483 |
| M351T98    | 351. 0908509 | 97. 682  | 11759810. 65 |
| M351T314   | 351. 0910549 | 313. 612 | 11766376. 98 |
| M351T194   | 351. 0905818 | 194. 243 | 7331564. 978 |
| M351T352   | 351. 0940198 | 351. 663 | 3011873. 46  |
| M351T294_1 | 351. 0910286 | 294. 152 | 19122388. 86 |
| M351T261   | 351. 0905434 | 261. 138 | 7496687. 57  |
| M351T146   | 351. 0916342 | 146. 08  | 6568014. 76  |
| M351T343   | 351. 090819  | 342. 819 | 3180096. 19  |
| M351T303   | 351. 0910644 | 303. 259 | 11546653. 82 |
| M351T257   | 351. 1033648 | 257. 001 | 2471047. 933 |
| M351T188   | 351. 1033509 | 188. 174 | 3504348. 174 |
| M351T329   | 351. 099675  | 328. 999 | 2619517. 985 |
| M351T127   | 351. 0994229 | 126. 755 | 2987355. 314 |
| M351T205   | 351. 1033007 | 204. 895 | 6613323. 558 |
| M351T215   | 351. 0994472 | 215. 4   | 9514085. 146 |
| M351T435   | 351. 1080023 | 434. 617 | 569247. 1347 |
| M351T302   | 351. 1077874 | 301. 725 | 1054611. 208 |
| M351T294_2 | 351. 1079661 | 294. 152 | 2539936. 697 |
| M351T379   | 351. 1181503 | 379. 066 | 392683. 3787 |
| M351T813   | 351. 1226694 | 812. 68  | 2343244. 94  |
| M351T238   | 351. 1238903 | 238. 024 | 8520406. 058 |
| M351T326   | 351. 1291103 | 325. 901 | 58848748. 63 |
| M351T394   | 351. 1290841 | 394. 467 | 8206821. 359 |
| M351T346   | 351. 1376741 | 345. 761 | 816541. 4071 |
| M351T355   | 351. 1653068 | 354. 719 | 819606. 7269 |
| M351T492   | 351. 1638359 | 491. 99  | 663989. 6843 |
| M351T704   | 351. 1993218 | 704. 046 | 505081. 2512 |
| M351T779   | 351. 2143722 | 779. 407 | 7263489. 429 |
| M351T629   | 351. 2179955 | 629. 272 | 823961. 3833 |
| M351T549   | 351. 2186139 | 549. 371 | 1961833. 492 |
| M352T740   | 351. 8973278 | 739. 509 | 1633712. 061 |
| M352T71_1  | 351. 9230035 | 70. 607  | 9920144. 872 |
| M352T282   | 352. 0616193 | 281. 942 | 1227666. 73  |

|            |              |          |              |
|------------|--------------|----------|--------------|
| M352T447   | 352. 0663761 | 446. 967 | 242641. 1983 |
| M352T355   | 352. 0804455 | 354. 719 | 1275454. 539 |
| M352T369   | 352. 0804132 | 368. 559 | 1292554. 37  |
| M352T349   | 352. 0864559 | 348. 668 | 2844296. 027 |
| M352T290   | 352. 0858043 | 289. 534 | 4240805. 534 |
| M352T323   | 352. 086696  | 322. 862 | 2329360. 599 |
| M352T81    | 352. 0892115 | 80. 6174 | 3888590. 988 |
| M352T337   | 352. 0943261 | 336. 681 | 768298. 7209 |
| M352T262   | 352. 0967154 | 262. 302 | 308690. 4243 |
| M352T294   | 352. 0976178 | 294. 152 | 1175984. 766 |
| M352T303   | 352. 0969228 | 303. 259 | 1071716. 772 |
| M352T221   | 352. 1061725 | 221. 453 | 287466. 1845 |
| M352T214   | 352. 1060431 | 213. 897 | 496248. 4432 |
| M352T365   | 352. 1133495 | 365. 475 | 283891. 9217 |
| M352T106   | 352. 1226156 | 105. 537 | 8583150. 567 |
| M352T237   | 352. 1243081 | 236. 518 | 1462075. 831 |
| M352T146   | 352. 1234869 | 146. 08  | 3888937. 629 |
| M352T394_1 | 352. 1317114 | 394. 467 | 1141995. 067 |
| M352T432   | 352. 139061  | 431. 507 | 223844. 6093 |
| M352T384   | 352. 1536878 | 383. 727 | 729509. 1313 |
| M352T506   | 352. 1633085 | 505. 99  | 283273. 1075 |
| M352T394_2 | 352. 1741884 | 394. 467 | 776291. 9791 |
| M352T302   | 352. 1971088 | 301. 725 | 598248. 7283 |
| M352T779   | 352. 2189678 | 779. 407 | 937842. 661  |
| M352T71_2  | 352. 4250691 | 70. 607  | 2240595. 809 |
| M353T740   | 352. 8900611 | 739. 509 | 6246420. 049 |
| M353T753   | 352. 8903137 | 753. 315 | 1057256. 159 |
| M353T79    | 353. 0693675 | 79. 4105 | 394092577. 3 |
| M353T246   | 353. 0754468 | 246. 474 | 390494. 9289 |
| M353T231_1 | 353. 075302  | 230. 507 | 1613464. 159 |
| M353T172   | 353. 0810872 | 171. 546 | 78037345. 28 |
| M353T332   | 353. 0842732 | 332. 105 | 17193902. 84 |
| M353T155   | 353. 081191  | 155. 033 | 52859473. 44 |
| M353T518   | 353. 0850864 | 518. 474 | 1015645. 249 |
| M353T340   | 353. 0831119 | 339. 772 | 14250836. 72 |
| M353T191   | 353. 081098  | 191. 259 | 148302793. 9 |
| M353T369   | 353. 0859154 | 368. 559 | 15063082. 32 |
| M353T594_1 | 353. 0867283 | 593. 841 | 3854828. 035 |
| M353T231_2 | 353. 0888646 | 230. 507 | 1857757. 171 |
| M353T450   | 353. 0938222 | 450. 052 | 1168958. 489 |
| M353T106   | 353. 1068229 | 105. 537 | 5064048. 702 |
| M353T84    | 353. 1073167 | 83. 9405 | 5001346. 209 |
| M353T793   | 353. 101638  | 793. 233 | 8996192. 471 |
| M353T321   | 353. 1072609 | 321. 312 | 1361877. 805 |
| M353T492   | 353. 1015828 | 491. 99  | 2808651. 992 |
| M353T349   | 353. 1185076 | 348. 668 | 1136049. 997 |
| M353T184   | 353. 1298199 | 183. 708 | 1857736. 717 |
| M353T197   | 353. 1286375 | 197. 335 | 885074. 8797 |
| M353T326   | 353. 1338199 | 325. 901 | 2081478. 367 |
| M353T396   | 353. 1339347 | 396. 023 | 581491. 7358 |
| M353T407   | 353. 1337413 | 406. 813 | 694952. 0546 |
| M353T335   | 353. 1455466 | 335. 153 | 593043. 9973 |
| M353T314   | 353. 1456243 | 313. 612 | 656504. 4571 |
| M353T323   | 353. 1456153 | 322. 862 | 688712. 9648 |

|            |              |          |              |
|------------|--------------|----------|--------------|
| M353T91    | 353. 1645891 | 90. 9026 | 89381086. 55 |
| M353T467   | 353. 179493  | 467. 127 | 1636038. 209 |
| M353T835   | 353. 1953737 | 835. 329 | 1771590. 755 |
| M353T584   | 353. 1983526 | 584. 484 | 408395. 5921 |
| M353T594_2 | 353. 2305843 | 593. 841 | 1021825. 367 |
| M354T668   | 354. 0594961 | 667. 612 | 672617. 4792 |
| M354T288   | 354. 065553  | 287. 981 | 726824. 0614 |
| M354T188   | 354. 0659202 | 188. 174 | 4109540. 152 |
| M354T200   | 354. 0652973 | 200. 362 | 2406974. 32  |
| M354T220   | 354. 0664456 | 219. 979 | 5935892. 251 |
| M354T79    | 354. 0744526 | 79. 4105 | 47042102. 86 |
| M354T191   | 354. 0879105 | 191. 259 | 39677296. 71 |
| M354T369   | 354. 0908925 | 368. 559 | 3135853. 125 |
| M354T332   | 354. 0916215 | 332. 105 | 2386442. 43  |
| M354T340   | 354. 0913613 | 339. 772 | 2810277. 414 |
| M354T286   | 354. 1043746 | 286. 433 | 4930948. 112 |
| M354T497   | 354. 1185164 | 496. 646 | 501134. 7447 |
| M354T481   | 354. 1185286 | 481. 089 | 21587312. 88 |
| M354T470   | 354. 1185167 | 470. 253 | 20516335. 37 |
| M354T459   | 354. 1184727 | 459. 324 | 2119697. 767 |
| M354T327   | 354. 1225172 | 327. 449 | 3747037. 79  |
| M354T408   | 354. 1396875 | 408. 368 | 1005289. 996 |
| M354T91_1  | 354. 1485851 | 90. 9026 | 86152881. 09 |
| M354T91_2  | 354. 1687942 | 90. 9026 | 10419602. 61 |
| M354T418   | 354. 1685465 | 417. 689 | 87760. 40115 |
| M355T444   | 355. 0690723 | 443. 961 | 238190. 8988 |
| M355T218   | 355. 0717779 | 218. 43  | 571640. 6409 |
| M355T191_1 | 355. 0690682 | 191. 259 | 4491479. 961 |
| M355T79    | 355. 075169  | 79. 4105 | 8542754. 553 |
| M355T106   | 355. 0860972 | 105. 537 | 16137906. 98 |
| M355T170   | 355. 0854408 | 170. 049 | 2455042. 057 |
| M355T82    | 355. 08596   | 81. 8855 | 22607313. 13 |
| M355T191_2 | 355. 0898756 | 191. 259 | 4140117. 898 |
| M355T433   | 355. 1009877 | 433. 06  | 4160212. 387 |
| M355T472   | 355. 101284  | 471. 768 | 1973456. 846 |
| M355T147   | 355. 0992169 | 147. 455 | 1300185. 257 |
| M355T365   | 355. 1016591 | 365. 475 | 1272479. 058 |
| M355T408   | 355. 1025474 | 408. 368 | 1869018. 261 |
| M355T178   | 355. 0993147 | 177. 649 | 10173994. 47 |
| M355T461   | 355. 1026324 | 460. 89  | 2277606. 284 |
| M355T793_1 | 355. 1100952 | 793. 233 | 265402. 9613 |
| M355T385   | 355. 1092314 | 385. 225 | 697835. 5722 |
| M355T807   | 355. 1255235 | 806. 698 | 1495957. 193 |
| M355T340   | 355. 1203653 | 339. 772 | 745555. 2615 |
| M355T290   | 355. 1326049 | 289. 534 | 6434126. 71  |
| M355T261   | 355. 1321187 | 261. 138 | 1642018. 891 |
| M355T199   | 355. 1327095 | 198. 821 | 9725748. 791 |
| M355T217   | 355. 1375779 | 216. 95  | 32313954. 31 |
| M355T237   | 355. 1383946 | 236. 518 | 17992290. 23 |
| M355T758_1 | 355. 1502894 | 757. 881 | 59059625. 6  |
| M355T779   | 355. 1579498 | 779. 407 | 3024943. 766 |
| M355T194   | 355. 1612851 | 194. 243 | 225522. 7566 |
| M355T320   | 355. 1621364 | 319. 785 | 674456. 2852 |
| M355T808   | 355. 1689619 | 808. 251 | 405732. 7392 |

|            |             |         |             |
|------------|-------------|---------|-------------|
| M355T422   | 355.1641491 | 422.362 | 78830.01162 |
| M355T758_2 | 355.1606054 | 757.881 | 38406209.4  |
| M355T740   | 355.1748123 | 739.509 | 534260.3601 |
| M355T793_2 | 355.2137511 | 793.233 | 10658719.21 |
| M355T829   | 355.2468195 | 829.321 | 1028736.689 |
| M355T834   | 355.264513  | 833.866 | 2919639.12  |
| M356T514   | 356.039896  | 513.768 | 1015736.259 |
| M356T215   | 356.0767802 | 215.4   | 1443109.668 |
| M356T160   | 356.0766312 | 159.635 | 49961801.26 |
| M356T119   | 356.0804885 | 119.413 | 17249388.67 |
| M356T109   | 356.0802851 | 109.475 | 9048982.074 |
| M356T249   | 356.0893329 | 248.622 | 5741013.025 |
| M356T179_1 | 356.0893753 | 179.046 | 8806406.151 |
| M356T172   | 356.0891283 | 171.546 | 4519990.212 |
| M356T179_2 | 356.1008009 | 179.046 | 1301416.354 |
| M356T312   | 356.1073721 | 312.058 | 287618.7601 |
| M356T291   | 356.1177788 | 291.076 | 2239284.296 |
| M356T263   | 356.1178717 | 263.129 | 2477184.417 |
| M356T278   | 356.1203428 | 278.267 | 894889.0442 |
| M356T218   | 356.1364887 | 218.43  | 4414602.988 |
| M356T311   | 356.143317  | 310.626 | 674955.4255 |
| M356T327   | 356.1447615 | 327.449 | 1304385.027 |
| M356T416   | 356.1534881 | 416.128 | 1573423.361 |
| M356T424   | 356.1531959 | 423.877 | 2099677.55  |
| M356T758   | 356.1617611 | 757.881 | 12430229.29 |
| M356T792   | 356.2145614 | 791.678 | 1983887.518 |
| M356T776   | 356.2214897 | 776.391 | 358370.7384 |
| M356T489   | 356.2568175 | 488.885 | 1355956.294 |
| M356T832   | 356.2661292 | 832.338 | 283432.8186 |
| M357T79    | 356.9917389 | 79.4105 | 39818704.73 |
| M357T209   | 357.0399734 | 209.472 | 1231595.988 |
| M357T421   | 357.0596881 | 420.799 | 2870262.371 |
| M357T161   | 357.0602776 | 161.184 | 344209.001  |
| M357T211   | 357.0555731 | 210.883 | 1033033.07  |
| M357T393_1 | 357.0814286 | 392.905 | 576285.0676 |
| M357T341   | 357.077421  | 341.266 | 1391461.418 |
| M357T182   | 357.0844441 | 182.156 | 1181198.101 |
| M357T152   | 357.0854107 | 152.08  | 3481089.141 |
| M357T793   | 357.095945  | 793.233 | 8360763.522 |
| M357T427   | 357.0940968 | 426.913 | 942254.4538 |
| M357T487   | 357.0933573 | 487.329 | 3688615.298 |
| M357T672   | 357.0967443 | 672.229 | 745956.0386 |
| M357T629_1 | 357.0958344 | 629.272 | 1170757.869 |
| M357T802   | 357.0957839 | 802.116 | 1723879.661 |
| M357T99    | 357.1022616 | 98.9649 | 17380147.87 |
| M357T106   | 357.1023207 | 105.537 | 24589355.2  |
| M357T143   | 357.1022018 | 143.174 | 4740724.065 |
| M357T92    | 357.105293  | 91.9113 | 9802261.825 |
| M357T155   | 357.1024444 | 155.033 | 3114120.775 |
| M357T84    | 357.1055324 | 83.9405 | 41554285.03 |
| M357T197   | 357.1123005 | 197.335 | 2060587.75  |
| M357T435   | 357.1175753 | 434.617 | 1619722.164 |
| M357T249   | 357.1141601 | 248.622 | 1699540.571 |
| M357T331   | 357.1155042 | 330.552 | 3342750.977 |

|            |              |          |              |
|------------|--------------|----------|--------------|
| M357T393_2 | 357. 1188996 | 392. 905 | 1402568. 562 |
| M357T422   | 357. 1159319 | 422. 362 | 1536738. 828 |
| M357T372   | 357. 1189595 | 371. 633 | 1535984. 247 |
| M357T294   | 357. 1134885 | 294. 152 | 4821764. 216 |
| M357T405   | 357. 1188225 | 405. 254 | 1018876. 458 |
| M357T665   | 357. 1314319 | 664. 565 | 1342750. 742 |
| M357T288   | 357. 1293275 | 287. 981 | 573770. 4215 |
| M357T651   | 357. 1311135 | 650. 74  | 2150938. 618 |
| M357T332   | 357. 1294592 | 332. 105 | 887075. 6004 |
| M357T694   | 357. 1392701 | 694. 341 | 5394042. 827 |
| M357T215   | 357. 1390664 | 215. 4   | 830500. 4104 |
| M357T629_2 | 357. 14461   | 629. 272 | 1938813. 091 |
| M357T643   | 357. 1526797 | 643. 166 | 2116446. 509 |
| M357T424   | 357. 1587616 | 423. 877 | 400252. 7288 |
| M357T525   | 357. 1654134 | 524. 56  | 1981202. 453 |
| M357T376   | 357. 1662507 | 376. 15  | 450149. 2517 |
| M357T834   | 357. 1802209 | 833. 866 | 2049677. 124 |
| M357T494   | 357. 180516  | 493. 56  | 292440. 867  |
| M357T775   | 357. 17363   | 774. 892 | 811228. 7718 |
| M357T669   | 357. 1934285 | 669. 12  | 254857. 8574 |
| M357T556   | 357. 1904367 | 555. 524 | 3216730. 076 |
| M357T583   | 357. 1903222 | 582. 96  | 916555. 2784 |
| M357T411   | 357. 2125464 | 411. 444 | 1468570. 385 |
| M357T404   | 357. 212535  | 403. 698 | 1216107. 371 |
| M357T323   | 357. 2219751 | 322. 862 | 466817. 051  |
| M357T703   | 357. 2270862 | 702. 622 | 836692. 7916 |
| M357T741   | 357. 2283531 | 741. 077 | 532586. 4248 |
| M358T388_1 | 357. 9321964 | 388. 326 | 258599. 4317 |
| M358T421   | 358. 0682787 | 420. 799 | 427192. 5327 |
| M358T422   | 358. 0786707 | 422. 362 | 1166870. 332 |
| M358T208   | 358. 0892477 | 207. 935 | 364990. 2852 |
| M358T514   | 358. 0916127 | 513. 768 | 630707. 4703 |
| M358T127   | 358. 0888211 | 126. 755 | 1015856. 795 |
| M358T175_1 | 358. 0893721 | 174. 576 | 705579. 5946 |
| M358T160   | 358. 0894391 | 159. 635 | 1585099. 706 |
| M358T291   | 358. 0979543 | 291. 076 | 1004742. 9   |
| M358T793   | 358. 0977413 | 793. 233 | 1255664. 154 |
| M358T487   | 358. 0976988 | 487. 329 | 716908. 565  |
| M358T111   | 358. 0989564 | 110. 926 | 10541114. 92 |
| M358T146   | 358. 0989484 | 146. 08  | 11054811. 6  |
| M358T175_2 | 358. 1043702 | 174. 576 | 2831423. 734 |
| M358T337   | 358. 1123667 | 336. 681 | 13822096. 55 |
| M358T617   | 358. 1309154 | 616. 891 | 1445590. 8   |
| M358T388_2 | 358. 139006  | 388. 326 | 20249118. 5  |
| M358T694   | 358. 1378103 | 694. 341 | 952603. 2927 |
| M358T407   | 358. 142983  | 406. 813 | 1778499. 899 |
| M358T388_3 | 358. 1502289 | 388. 326 | 104285898. 8 |
| M358T199   | 358. 1487364 | 198. 821 | 6468128. 457 |
| M358T416   | 358. 157901  | 416. 128 | 195052. 9677 |
| M358T459   | 358. 1635083 | 459. 324 | 777048. 9537 |
| M358T353   | 358. 1967771 | 353. 163 | 610327. 1672 |
| M358T344   | 358. 1967005 | 344. 233 | 1563892. 08  |
| M358T405   | 358. 1960408 | 405. 254 | 4638972. 955 |
| M358T761   | 358. 201534  | 760. 976 | 367396. 7672 |

|            |              |          |              |
|------------|--------------|----------|--------------|
| M358T388_4 | 358. 3667337 | 388. 326 | 198455. 7902 |
| M359T69    | 359. 0225546 | 69. 1983 | 321358. 0147 |
| M359T163   | 359. 0768028 | 162. 615 | 5724081. 244 |
| M359T291   | 359. 072019  | 291. 076 | 5135388. 842 |
| M359T119   | 359. 0769853 | 119. 413 | 30744596. 99 |
| M359T145   | 359. 0719144 | 144. 706 | 13077318. 7  |
| M359T315   | 359. 072873  | 315. 162 | 2029602. 326 |
| M359T331   | 359. 0761302 | 330. 552 | 3524860. 557 |
| M359T107   | 359. 0717783 | 106. 648 | 30746796. 14 |
| M359T179   | 359. 0718091 | 179. 046 | 2990384. 228 |
| M359T229   | 359. 0718038 | 228. 961 | 748019. 2836 |
| M359T215   | 359. 0718072 | 215. 4   | 1356064. 53  |
| M359T199   | 359. 071778  | 198. 821 | 2041427. 717 |
| M359T439   | 359. 0752218 | 439. 27  | 1980451. 628 |
| M359T427   | 359. 0786328 | 426. 913 | 5389639. 268 |
| M359T781   | 359. 0819585 | 780. 958 | 4386601. 765 |
| M359T388_1 | 359. 0858816 | 388. 326 | 4769636. 086 |
| M359T410_1 | 359. 0962672 | 409. 881 | 1765598. 886 |
| M359T283   | 359. 0957191 | 282. 659 | 756070. 9662 |
| M359T173   | 359. 0963151 | 173. 092 | 8577653. 544 |
| M359T154   | 359. 0963664 | 153. 601 | 5209779. 891 |
| M359T303   | 359. 09636   | 303. 259 | 983264. 2533 |
| M359T461   | 359. 0964164 | 460. 89  | 2222739. 162 |
| M359T376   | 359. 1011116 | 376. 15  | 1122300. 089 |
| M359T410_2 | 359. 1091793 | 409. 881 | 1593040. 924 |
| M359T500   | 359. 1140961 | 499. 759 | 472546. 0313 |
| M359T102   | 359. 11681   | 101. 563 | 16478483. 18 |
| M359T337   | 359. 1173022 | 336. 681 | 2255280. 481 |
| M359T318   | 359. 1188922 | 318. 232 | 530452. 6972 |
| M359T92    | 359. 120476  | 91. 9113 | 23162122. 03 |
| M359T396   | 359. 135301  | 396. 023 | 1913338. 817 |
| M359T425   | 359. 1317175 | 425. 439 | 3166901. 573 |
| M359T601   | 359. 1482696 | 601. 473 | 5274224. 514 |
| M359T615   | 359. 1482916 | 615. 38  | 20809896. 63 |
| M359T583   | 359. 1485644 | 582. 96  | 12728126. 55 |
| M359T388_2 | 359. 151263  | 388. 326 | 16825425. 01 |
| M359T712   | 359. 1499543 | 711. 794 | 557887. 844  |
| M359T278   | 359. 1559557 | 278. 267 | 655862. 8613 |
| M359T200   | 359. 1550465 | 200. 362 | 1556242. 453 |
| M359T605   | 359. 1706795 | 604. 606 | 2011979. 11  |
| M359T620   | 359. 1685565 | 619. 986 | 1684105. 492 |
| M359T612   | 359. 1706655 | 612. 3   | 2335664. 699 |
| M359T629   | 359. 1687285 | 629. 272 | 1326214. 475 |
| M359T640   | 359. 1688541 | 640. 057 | 1482738. 961 |
| M359T828   | 359. 185197  | 827. 821 | 1754015. 698 |
| M359T575   | 359. 1965569 | 575. 222 | 196233. 3297 |
| M359T405   | 359. 1995475 | 405. 254 | 461447. 7753 |
| M360T69    | 359. 9303149 | 69. 1983 | 268548. 9639 |
| M360T83    | 360. 0299658 | 82. 8986 | 21621664. 6  |
| M360T428   | 360. 0671776 | 428. 448 | 1002685. 747 |
| M360T291   | 360. 0756301 | 291. 076 | 632161. 9899 |
| M360T119   | 360. 0768679 | 119. 413 | 4416789. 803 |
| M360T107   | 360. 0760348 | 106. 648 | 3370266. 894 |
| M360T33    | 360. 0825931 | 32. 8715 | 110085. 8157 |



|            |             |         |             |
|------------|-------------|---------|-------------|
| M360T512   | 360.0901641 | 512.228 | 1017347.073 |
| M360T425   | 360.08654   | 425.439 | 723810.9748 |
| M360T382   | 360.0911693 | 382.171 | 2343997.87  |
| M360T121   | 360.1123916 | 120.945 | 2758477.303 |
| M360T789_1 | 360.1126199 | 788.604 | 13876285.34 |
| M360T470   | 360.1067744 | 470.253 | 1182708.243 |
| M360T372   | 360.1060439 | 371.633 | 367472.0813 |
| M360T108   | 360.1124559 | 108.082 | 3635304.164 |
| M360T158   | 360.1141506 | 158.1   | 2338649.682 |
| M360T169   | 360.1141254 | 168.507 | 864779.6118 |
| M360T146   | 360.1141743 | 146.08  | 6698101.253 |
| M360T789_2 | 360.123967  | 788.604 | 2178835.197 |
| M360T294   | 360.1278771 | 294.152 | 1247263.538 |
| M360T241   | 360.1262878 | 240.733 | 4446415.538 |
| M360T329   | 360.1297142 | 328.999 | 1526634.968 |
| M360T387   | 360.129549  | 386.78  | 1980346.352 |
| M360T583   | 360.1498825 | 582.96  | 2225305.957 |
| M360T615   | 360.1514383 | 615.38  | 4437411.02  |
| M360T388   | 360.1589674 | 388.326 | 1347625.985 |
| M361T740   | 360.9233044 | 739.509 | 316322.6247 |
| M361T65    | 360.9736958 | 65.4825 | 2390186.736 |
| M361T163   | 361.0695979 | 162.615 | 2394071.104 |
| M361T119   | 361.0694236 | 119.413 | 9939993.276 |
| M361T145_1 | 361.0693927 | 144.706 | 2743302.59  |
| M361T107   | 361.0691948 | 106.648 | 9847820.413 |
| M361T294_1 | 361.0704133 | 294.152 | 717503.1324 |
| M361T145_2 | 361.0899751 | 144.706 | 1442867.88  |
| M361T365   | 361.0883515 | 365.475 | 517721.5235 |
| M361T385   | 361.0929857 | 385.225 | 1486857.204 |
| M361T439_1 | 361.0931918 | 439.27  | 1901509.401 |
| M361T506   | 361.0996795 | 505.99  | 1354126.775 |
| M361T411   | 361.1135546 | 411.444 | 3856224.147 |
| M361T706   | 361.1118829 | 705.593 | 510209.1864 |
| M361T425   | 361.1167861 | 425.439 | 550932.3122 |
| M361T352   | 361.112759  | 351.663 | 3746338.365 |
| M361T294_2 | 361.113548  | 294.152 | 884018.3107 |
| M361T439_2 | 361.1244119 | 439.27  | 283765.9437 |
| M361T317   | 361.1281351 | 316.709 | 1038866.227 |
| M361T518   | 361.1322292 | 518.474 | 463541.1591 |
| M361T508   | 361.1258284 | 507.55  | 3415495.522 |
| M361T390   | 361.1491439 | 389.839 | 1353240.948 |
| M361T346   | 361.1494743 | 345.761 | 1157151.438 |
| M361T372   | 361.1494388 | 371.633 | 9024788.89  |
| M361T424   | 361.1509333 | 423.877 | 5082119.333 |
| M361T334   | 361.1494792 | 333.655 | 1436331.467 |
| M361T461_1 | 361.1495917 | 460.89  | 3481359.696 |
| M361T355   | 361.1614553 | 354.719 | 871079.1243 |
| M361T232   | 361.1600629 | 231.973 | 4279809.425 |
| M361T615   | 361.1597774 | 615.38  | 1019160.131 |
| M361T572   | 361.1633137 | 572.152 | 6878167.107 |
| M361T586   | 361.1632894 | 586.044 | 16404313.12 |
| M361T638   | 361.163086  | 638.484 | 1941293.935 |
| M361T631   | 361.1801958 | 630.737 | 2652867.862 |
| M361T321   | 361.1802395 | 321.312 | 1563287.446 |

|            |              |          |              |
|------------|--------------|----------|--------------|
| M361T475   | 361. 1851827 | 474. 888 | 706555. 0717 |
| M361T640   | 361. 1796862 | 640. 057 | 4410448. 351 |
| M361T461_2 | 361. 1850252 | 460. 89  | 474249. 8388 |
| M361T668   | 361. 1861539 | 667. 612 | 10861992. 5  |
| M361T603   | 361. 2086747 | 603. 04  | 517693. 5831 |
| M361T438   | 361. 2225893 | 437. 734 | 4056257. 884 |
| M361T69    | 361. 4276578 | 69. 1983 | 798086. 0849 |
| M362T133   | 362. 0493881 | 132. 707 | 2059253. 146 |
| M362T238   | 362. 0485133 | 238. 024 | 3220102. 729 |
| M362T394   | 362. 0721298 | 394. 467 | 709171. 7686 |
| M362T308   | 362. 0748415 | 307. 616 | 5411802. 62  |
| M362T387   | 362. 0723324 | 386. 78  | 1128046. 089 |
| M362T282   | 362. 0705945 | 281. 942 | 585366. 8424 |
| M362T240   | 362. 0822978 | 239. 574 | 245051. 8835 |
| M362T388   | 362. 0871052 | 388. 326 | 1480314. 571 |
| M362T419   | 362. 0953903 | 419. 237 | 1477938. 208 |
| M362T343   | 362. 0986573 | 342. 819 | 788103. 7464 |
| M362T365   | 362. 1073544 | 365. 475 | 491200. 0641 |
| M362T401   | 362. 1074734 | 400. 641 | 1109080. 524 |
| M362T290   | 362. 1081636 | 289. 534 | 744275. 7469 |
| M362T288   | 362. 1187853 | 287. 981 | 333513. 4117 |
| M362T472   | 362. 1441878 | 471. 768 | 772903. 3919 |
| M362T323   | 362. 1441396 | 322. 862 | 1880854. 948 |
| M362T232   | 362. 1644906 | 231. 973 | 447578. 3123 |
| M362T572   | 362. 166124  | 572. 152 | 1343153. 445 |
| M362T586   | 362. 1687384 | 586. 044 | 3923115. 17  |
| M362T591   | 362. 1816485 | 590. 717 | 458494. 4276 |
| M362T424   | 362. 179575  | 423. 877 | 524547. 5913 |
| M362T415   | 362. 1847204 | 414. 571 | 1449908. 591 |
| M362T668   | 362. 1874131 | 667. 612 | 1776421. 096 |
| M363T33    | 362. 9851604 | 32. 8715 | 50707. 56736 |
| M363T79    | 363. 0225621 | 79. 4105 | 12952356. 4  |
| M363T71    | 363. 0346819 | 70. 607  | 6399815. 509 |
| M363T240   | 363. 0537138 | 239. 574 | 162897. 3239 |
| M363T404   | 363. 0722445 | 403. 698 | 717580. 8475 |
| M363T370_1 | 363. 1039667 | 370. 115 | 2310633. 543 |
| M363T361   | 363. 1046415 | 360. 831 | 3219906. 224 |
| M363T408   | 363. 1023087 | 408. 368 | 1721064. 161 |
| M363T472   | 363. 1184765 | 471. 768 | 1396707. 846 |
| M363T421   | 363. 1262883 | 420. 799 | 566928. 8259 |
| M363T370_2 | 363. 1233941 | 370. 115 | 419112. 2328 |
| M363T514   | 363. 1394443 | 513. 768 | 6184355. 41  |
| M363T352   | 363. 1659671 | 351. 663 | 4600493. 255 |
| M363T362   | 363. 1659617 | 362. 384 | 12864822. 7  |
| M363T378   | 363. 1661839 | 377. 64  | 2386625. 175 |
| M363T537   | 363. 1783265 | 537. 051 | 13197110. 65 |
| M363T331   | 363. 176517  | 330. 552 | 2291969. 814 |
| M363T394   | 363. 1753388 | 394. 467 | 35774. 57391 |
| M363T557   | 363. 1805891 | 557. 078 | 3315585. 809 |
| M363T668   | 363. 1924625 | 667. 612 | 2788906. 107 |
| M363T595   | 363. 193053  | 595. 35  | 7621355. 461 |
| M363T393   | 363. 1865903 | 392. 905 | 1472116. 479 |
| M363T635   | 363. 1921339 | 635. 37  | 2389056. 323 |
| M363T611   | 363. 1930635 | 610. 742 | 558463. 1425 |

|            |              |          |              |
|------------|--------------|----------|--------------|
| M363T740   | 363. 1929815 | 739. 509 | 1669071. 922 |
| M364T224   | 363. 9689377 | 224. 484 | 292833. 0098 |
| M364T661   | 364. 0286766 | 661. 453 | 1544028. 266 |
| M364T643   | 364. 0306459 | 643. 166 | 1197995. 221 |
| M364T675   | 364. 0289947 | 675. 322 | 989650. 6026 |
| M364T329   | 364. 0874895 | 328. 999 | 5813759. 683 |
| M364T290   | 364. 0989043 | 289. 534 | 973620. 9896 |
| M364T182   | 364. 099756  | 182. 156 | 2060101. 046 |
| M364T498   | 364. 1025163 | 498. 202 | 690439. 5323 |
| M364T770   | 364. 1021502 | 770. 235 | 762101. 3516 |
| M364T318   | 364. 1022076 | 318. 232 | 1029834. 233 |
| M364T169   | 364. 0982192 | 168. 507 | 1914260. 318 |
| M364T552   | 364. 1121906 | 552. 493 | 9704555. 245 |
| M364T473   | 364. 135394  | 473. 329 | 427170. 0365 |
| M364T514   | 364. 1438407 | 513. 768 | 1498578. 563 |
| M364T446   | 364. 1535253 | 445. 522 | 185596. 9595 |
| M364T343   | 364. 1606982 | 342. 819 | 1877830. 567 |
| M364T334   | 364. 1607196 | 333. 655 | 1261923. 133 |
| M364T441   | 364. 1695152 | 440. 833 | 295011. 0848 |
| M364T362   | 364. 1683456 | 362. 384 | 1959829. 071 |
| M364T352   | 364. 1743877 | 351. 663 | 377554. 8233 |
| M364T537   | 364. 181175  | 537. 051 | 2159490. 155 |
| M364T595   | 364. 1954868 | 595. 35  | 2198727. 735 |
| M364T548   | 364. 1957254 | 547. 805 | 1300081. 845 |
| M365T83    | 365. 0452297 | 82. 8986 | 10825343. 99 |
| M365T72    | 365. 0711807 | 72. 0941 | 46015555. 67 |
| M365T199   | 365. 084238  | 198. 821 | 933593. 802  |
| M365T428   | 365. 085413  | 428. 448 | 1687708. 388 |
| M365T329   | 365. 0871366 | 328. 999 | 627499. 1164 |
| M365T554   | 365. 1172401 | 554. 027 | 1931524. 068 |
| M365T452   | 365. 1230983 | 451. 616 | 880186. 4819 |
| M365T398   | 365. 1363293 | 397. 585 | 3725818. 118 |
| M365T379   | 365. 1330609 | 379. 066 | 22470124. 55 |
| M365T340   | 365. 133037  | 339. 772 | 885018. 909  |
| M365T359_1 | 365. 1330692 | 359. 297 | 1481413. 343 |
| M365T335   | 365. 1443643 | 335. 153 | 1083952. 662 |
| M365T370   | 365. 1446869 | 370. 115 | 3372067. 339 |
| M365T347   | 365. 1446495 | 347. 166 | 4630936. 055 |
| M365T323   | 365. 1446297 | 322. 862 | 1342289. 315 |
| M365T381   | 365. 1445167 | 380. 608 | 1342391. 393 |
| M365T359_2 | 365. 1446378 | 359. 297 | 21590491. 2  |
| M365T203   | 365. 1554139 | 203. 346 | 1708660. 301 |
| M365T362   | 365. 1702557 | 362. 384 | 187740. 2416 |
| M365T375   | 365. 1801966 | 374. 746 | 2315678. 91  |
| M365T545   | 365. 1800579 | 544. 759 | 1383246. 114 |
| M365T525   | 365. 1802791 | 524. 56  | 929822. 1226 |
| M365T681   | 365. 1943311 | 681. 406 | 822791. 7611 |
| M365T595   | 365. 1907208 | 595. 35  | 2151469. 88  |
| M365T671   | 365. 1909297 | 670. 674 | 467971. 0892 |
| M365T503   | 365. 1959381 | 502. 873 | 2720134. 416 |
| M365T703   | 365. 209039  | 702. 622 | 4552695. 505 |
| M365T669   | 365. 2090509 | 669. 12  | 5476956. 169 |
| M365T660   | 365. 2087542 | 659. 904 | 1648000. 882 |
| M365T683   | 365. 2090827 | 682. 948 | 6280713. 645 |

|            |              |          |              |
|------------|--------------|----------|--------------|
| M365T626   | 365. 2067339 | 626. 183 | 32428831. 63 |
| M365T835   | 365. 2315759 | 835. 329 | 2240074. 324 |
| M365T810   | 365. 2446057 | 809. 797 | 312635. 4441 |
| M366T69    | 365. 9024475 | 69. 1983 | 676644. 4904 |
| M366T224   | 365. 9640372 | 224. 484 | 521158. 8314 |
| M366T68    | 366. 038871  | 67. 6441 | 319948. 6797 |
| M366T347   | 366. 0678139 | 347. 166 | 1101140. 571 |
| M366T215   | 366. 0644058 | 215. 4   | 1552377. 627 |
| M366T294   | 366. 0679744 | 294. 152 | 4888316. 212 |
| M366T200   | 366. 0661709 | 200. 362 | 2270267. 492 |
| M366T331   | 366. 0794453 | 330. 552 | 2205574. 68  |
| M366T384   | 366. 0936336 | 383. 727 | 406098. 6188 |
| M366T122   | 366. 111875  | 122. 381 | 12993251. 1  |
| M366T146   | 366. 1119437 | 146. 08  | 62806294. 12 |
| M366T108   | 366. 1118265 | 108. 082 | 22391175. 12 |
| M366T367   | 366. 1243635 | 367. 026 | 637670. 4206 |
| M366T356   | 366. 1241061 | 356. 274 | 1246214. 283 |
| M366T470   | 366. 1233741 | 470. 253 | 782849. 3991 |
| M366T430   | 366. 12407   | 429. 94  | 1080656. 103 |
| M366T486   | 366. 1230846 | 485. 784 | 1493596. 808 |
| M366T552   | 366. 1215852 | 552. 493 | 124483. 5398 |
| M366T452   | 366. 1236318 | 451. 616 | 1397803. 698 |
| M366T398   | 366. 1380487 | 397. 585 | 752295. 7758 |
| M366T379   | 366. 1379856 | 379. 066 | 4029574. 008 |
| M366T501   | 366. 1975022 | 501. 318 | 338031. 6902 |
| M366T626   | 366. 2116304 | 626. 183 | 7175578. 841 |
| M366T71    | 366. 4003935 | 70. 607  | 22462725. 17 |
| M367T71_1  | 366. 9039128 | 70. 607  | 4763110. 044 |
| M367T834_1 | 366. 9368398 | 833. 866 | 4765193. 837 |
| M367T746   | 366. 936066  | 745. 747 | 9482073. 246 |
| M367T802   | 366. 9411193 | 802. 116 | 4226812. 564 |
| M367T72    | 367. 0494208 | 72. 0941 | 973495. 3926 |
| M367T441   | 367. 0760641 | 440. 833 | 340960. 7201 |
| M367T107   | 367. 0860099 | 106. 648 | 6653346. 719 |
| M367T160   | 367. 0865658 | 159. 635 | 2337796. 885 |
| M367T146_1 | 367. 0915213 | 146. 08  | 3280906. 119 |
| M367T291   | 367. 0978806 | 291. 076 | 5809678. 601 |
| M367T413   | 367. 1025135 | 413. 006 | 3494658. 169 |
| M367T393   | 367. 1023706 | 392. 905 | 2919851. 157 |
| M367T197   | 367. 0980068 | 197. 335 | 5258304. 782 |
| M367T172_1 | 367. 0980242 | 171. 546 | 8078456. 544 |
| M367T381_1 | 367. 1021737 | 380. 608 | 3030455. 165 |
| M367T93    | 367. 103784  | 92. 9618 | 67905041. 94 |
| M367T712   | 367. 1156421 | 711. 794 | 1371354. 523 |
| M367T146_2 | 367. 1151897 | 146. 08  | 7284176. 26  |
| M367T227   | 367. 1240046 | 227. 421 | 1163939. 964 |
| M367T294   | 367. 1238623 | 294. 152 | 696258. 8506 |
| M367T642   | 367. 1313168 | 641. 603 | 319172. 8966 |
| M367T172_2 | 367. 1337625 | 171. 546 | 1345813. 541 |
| M367T381_2 | 367. 1337843 | 380. 608 | 12208441. 17 |
| M367T190   | 367. 1339165 | 189. 717 | 1084241. 611 |
| M367T234   | 367. 1456189 | 233. 519 | 281411. 4165 |
| M367T473   | 367. 1506321 | 473. 329 | 4259876. 044 |
| M367T560   | 367. 1521791 | 560. 119 | 1187021. 182 |

|            |              |          |              |
|------------|--------------|----------|--------------|
| M367T489   | 367. 1506062 | 488. 885 | 1464531. 562 |
| M367T359   | 367. 1502912 | 359. 297 | 793117. 1769 |
| M367T373   | 367. 1603804 | 373. 196 | 1046723. 508 |
| M367T404   | 367. 1604053 | 403. 698 | 949548. 9326 |
| M367T419   | 367. 1590825 | 419. 237 | 1379046. 759 |
| M367T387   | 367. 1606365 | 386. 78  | 852186. 8615 |
| M367T343   | 367. 1611856 | 342. 819 | 343538. 823  |
| M367T312   | 367. 1616361 | 312. 058 | 604830. 9999 |
| M367T523   | 367. 1956125 | 523. 055 | 3752832. 52  |
| M367T504   | 367. 1936542 | 504. 432 | 5345711. 429 |
| M367T749   | 367. 2075104 | 748. 742 | 2099825. 011 |
| M367T411   | 367. 2062635 | 411. 444 | 193297. 8642 |
| M367T626   | 367. 2055103 | 626. 183 | 9833449. 607 |
| M367T704   | 367. 2031423 | 704. 046 | 1202302. 658 |
| M367T643   | 367. 2140644 | 643. 166 | 684537. 0993 |
| M367T608   | 367. 2100775 | 607. 625 | 1973344. 163 |
| M367T583   | 367. 2150102 | 582. 96  | 360998. 5566 |
| M367T834_2 | 367. 2427534 | 833. 866 | 11056720. 72 |
| M367T71_2  | 367. 3991089 | 70. 607  | 1127912. 463 |
| M368T712   | 367. 8601672 | 711. 794 | 151502. 1515 |
| M368T746   | 367. 9447855 | 745. 747 | 294756. 2116 |
| M368T224   | 367. 9634977 | 224. 484 | 318739. 5905 |
| M368T315   | 368. 0816035 | 315. 162 | 14771955. 54 |
| M368T352   | 368. 0814478 | 351. 663 | 8267821. 942 |
| M368T294   | 368. 0815278 | 294. 152 | 42066639. 97 |
| M368T193   | 368. 0877912 | 192. 769 | 99359482. 42 |
| M368T149   | 368. 0879114 | 148. 981 | 11961022. 81 |
| M368T415   | 368. 1016386 | 414. 571 | 485708. 7906 |
| M368T391   | 368. 1152284 | 391. 341 | 358113. 9137 |
| M368T106   | 368. 1183029 | 105. 537 | 15423150. 37 |
| M368T158   | 368. 1186032 | 158. 1   | 1685452. 167 |
| M368T146   | 368. 1184114 | 146. 08  | 3492745. 025 |
| M368T334   | 368. 1293445 | 333. 655 | 1028325. 093 |
| M368T411   | 368. 1334298 | 411. 444 | 1040560. 042 |
| M368T472   | 368. 1363393 | 471. 768 | 651640. 2727 |
| M368T515   | 368. 1334023 | 515. 338 | 1138021. 386 |
| M368T379   | 368. 1345559 | 379. 066 | 2101568. 954 |
| M368T528   | 368. 133395  | 527. 688 | 1196403. 044 |
| M368T343   | 368. 1318403 | 342. 819 | 912970. 6876 |
| M368T428   | 368. 1324248 | 428. 448 | 996826. 6628 |
| M368T209   | 368. 1558058 | 209. 472 | 2608362. 665 |
| M368T220   | 368. 1560442 | 219. 979 | 665847. 6451 |
| M368T439   | 368. 1552066 | 439. 27  | 730118. 2839 |
| M368T626   | 368. 208754  | 626. 183 | 1745901. 446 |
| M368T835   | 368. 2448958 | 835. 329 | 1179888. 667 |
| M369T834   | 368. 9354691 | 833. 866 | 1747566. 44  |
| M369T746   | 368. 9342394 | 745. 747 | 3481209. 858 |
| M369T65    | 368. 9740788 | 65. 4825 | 42360. 92833 |
| M369T829_1 | 369. 0581368 | 829. 321 | 1493189. 19  |
| M369T72    | 369. 0684587 | 72. 0941 | 3583105. 199 |
| M369T435   | 369. 0818863 | 434. 617 | 1310117. 788 |
| M369T352   | 369. 082015  | 351. 663 | 939879. 5941 |
| M369T315   | 369. 0848496 | 315. 162 | 1817393. 893 |
| M369T224   | 369. 083427  | 224. 484 | 997321. 9991 |

|            |              |          |              |
|------------|--------------|----------|--------------|
| M369T194   | 369. 0847856 | 194. 243 | 15539563. 67 |
| M369T294_1 | 369. 0845431 | 294. 152 | 5032304. 743 |
| M369T163   | 369. 1025122 | 162. 615 | 149271088. 6 |
| M369T119   | 369. 1025686 | 119. 413 | 420799604. 1 |
| M369T331   | 369. 102562  | 330. 552 | 8746539. 1   |
| M369T106_1 | 369. 1025106 | 105. 537 | 706246646. 4 |
| M369T212   | 369. 1025517 | 212. 366 | 14540307. 01 |
| M369T146   | 369. 102586  | 146. 08  | 101157645. 7 |
| M369T294_2 | 369. 1092689 | 294. 152 | 3668770. 527 |
| M369T178   | 369. 1092184 | 177. 649 | 13274892. 42 |
| M369T199   | 369. 1092478 | 198. 821 | 6516415. 899 |
| M369T215   | 369. 1157216 | 215. 4   | 1434120. 014 |
| M369T92    | 369. 12003   | 91. 9113 | 15106290. 78 |
| M369T459   | 369. 1211518 | 459. 324 | 322415. 5997 |
| M369T710   | 369. 1329502 | 710. 246 | 8543900. 707 |
| M369T294_3 | 369. 1360992 | 294. 152 | 1936504. 532 |
| M369T396   | 369. 150399  | 396. 023 | 5205831. 88  |
| M369T825   | 369. 157198  | 824. 864 | 9480884. 443 |
| M369T835_1 | 369. 1572777 | 835. 329 | 11856635. 86 |
| M369T801   | 369. 1614601 | 800. 683 | 9021561. 69  |
| M369T531   | 369. 1663889 | 530. 804 | 588221. 2596 |
| M369T484   | 369. 1762162 | 484. 221 | 632570. 2701 |
| M369T811   | 369. 2026928 | 811. 292 | 40341122. 28 |
| M369T732   | 369. 2008253 | 731. 793 | 1155359. 861 |
| M369T353   | 369. 2119952 | 353. 163 | 504076. 0549 |
| M369T835_2 | 369. 2388077 | 835. 329 | 1824361. 502 |
| M369T106_2 | 369. 3301341 | 105. 537 | 1222974. 955 |
| M369T779   | 369. 3351701 | 779. 407 | 2749866. 779 |
| M369T829_2 | 369. 3350844 | 829. 321 | 10054187. 01 |
| M369T798   | 369. 3356047 | 797. 757 | 4445528. 469 |
| M370T226   | 369. 921608  | 225. 965 | 810118. 5998 |
| M370T523_1 | 370. 059713  | 523. 055 | 15625510. 88 |
| M370T151   | 370. 0610509 | 150. 528 | 1058642. 524 |
| M370T523_2 | 370. 0713631 | 523. 055 | 37629807. 02 |
| M370T68    | 370. 0762456 | 67. 6441 | 58724. 23307 |
| M370T176   | 370. 0870837 | 176. 104 | 858820. 3893 |
| M370T197   | 370. 0889338 | 197. 335 | 2661403. 41  |
| M370T294   | 370. 091607  | 294. 152 | 3748371. 916 |
| M370T329   | 370. 1023481 | 328. 999 | 873920. 2667 |
| M370T184   | 370. 099467  | 183. 708 | 5509232. 406 |
| M370T163   | 370. 1035301 | 162. 615 | 18914657. 51 |
| M370T119   | 370. 1033746 | 119. 413 | 53780458. 57 |
| M370T106   | 370. 1037191 | 105. 537 | 90815913. 34 |
| M370T200   | 370. 0992987 | 200. 362 | 4026036. 449 |
| M370T146   | 370. 1035377 | 146. 08  | 11027747. 8  |
| M370T394   | 370. 1145505 | 394. 467 | 1885937. 889 |
| M370T178   | 370. 1133167 | 177. 649 | 1699637. 446 |
| M370T723   | 370. 1371276 | 722. 604 | 526764. 8622 |
| M370T712   | 370. 1368619 | 711. 794 | 1281601. 147 |
| M370T799   | 370. 1609042 | 799. 306 | 947965. 7915 |
| M370T835   | 370. 1610085 | 835. 329 | 2299779. 614 |
| M370T625   | 370. 1851593 | 624. 642 | 980721. 3789 |
| M370T694   | 370. 1852724 | 694. 341 | 969853. 1541 |
| M370T669   | 370. 1859746 | 669. 12  | 1350204. 657 |

|            |              |          |              |
|------------|--------------|----------|--------------|
| M370T811   | 370. 206921  | 811. 292 | 9720409. 885 |
| M370T801   | 370. 2350818 | 800. 683 | 2970687. 498 |
| M371T69    | 370. 9057506 | 69. 1983 | 316528. 3856 |
| M371T358   | 371. 0561575 | 357. 746 | 2261893. 255 |
| M371T413   | 371. 0967979 | 413. 006 | 13689266. 4  |
| M371T390   | 371. 0967941 | 389. 839 | 2397882. 5   |
| M371T372   | 371. 0999192 | 371. 633 | 1518434. 09  |
| M371T446   | 371. 0962215 | 445. 522 | 1015979. 234 |
| M371T235   | 371. 0973148 | 234. 972 | 1326322. 475 |
| M371T334   | 371. 0968337 | 333. 655 | 902660. 8148 |
| M371T119_1 | 371. 1073668 | 119. 413 | 12849382. 37 |
| M371T107   | 371. 1073281 | 106. 648 | 17199524     |
| M371T146_1 | 371. 1073549 | 146. 08  | 2077233. 107 |
| M371T481   | 371. 110658  | 481. 089 | 4326091. 11  |
| M371T609   | 371. 1121759 | 609. 19  | 2140443. 719 |
| M371T470   | 371. 1107385 | 470. 253 | 6452522. 955 |
| M371T671   | 371. 1109447 | 670. 674 | 1312853. 217 |
| M371T384   | 371. 1117906 | 383. 727 | 421686. 6054 |
| M371T347   | 371. 1125006 | 347. 166 | 619606. 1756 |
| M371T726   | 371. 1108576 | 725. 713 | 1329221. 358 |
| M371T684   | 371. 1095436 | 684. 499 | 1029968. 899 |
| M371T492   | 371. 1142514 | 491. 99  | 4048465. 494 |
| M371T119_2 | 371. 1175126 | 119. 413 | 4166544. 971 |
| M371T208   | 371. 1184505 | 207. 935 | 2009602. 892 |
| M371T106   | 371. 1175086 | 105. 537 | 28921786. 99 |
| M371T146_2 | 371. 1201251 | 146. 08  | 7130916. 177 |
| M371T580   | 371. 1312401 | 579. 883 | 10197061. 81 |
| M371T478   | 371. 1346013 | 477. 982 | 1480955. 719 |
| M371T458   | 371. 13586   | 457. 763 | 1061929. 862 |
| M371T401   | 371. 1336421 | 400. 641 | 695372. 7375 |
| M371T591   | 371. 1359174 | 590. 717 | 1635904. 537 |
| M371T747   | 371. 1448295 | 747. 194 | 6590522. 756 |
| M371T221   | 371. 1441729 | 221. 453 | 916476. 5672 |
| M371T781   | 371. 1426781 | 780. 958 | 1396034. 805 |
| M371T710   | 371. 1482452 | 710. 246 | 18881980. 67 |
| M371T432   | 371. 1691901 | 431. 507 | 830363. 0023 |
| M371T813   | 371. 2004244 | 812. 68  | 15303456. 49 |
| M371T552   | 371. 2071587 | 552. 493 | 279831. 1188 |
| M371T715   | 371. 2429707 | 714. 841 | 1307147. 954 |
| M372T358_1 | 372. 0534429 | 357. 746 | 698474. 8848 |
| M372T523   | 372. 0707316 | 523. 055 | 1218045. 891 |
| M372T121   | 372. 0772641 | 120. 945 | 11829549. 41 |
| M372T147   | 372. 0770265 | 147. 455 | 4439095. 867 |
| M372T288   | 372. 0769536 | 287. 981 | 1387960. 973 |
| M372T109   | 372. 0771678 | 109. 475 | 7875212. 388 |
| M372T185   | 372. 0772476 | 185. 252 | 4802219. 907 |
| M372T170   | 372. 0772655 | 170. 049 | 3083401. 872 |
| M372T320   | 372. 0908873 | 319. 785 | 2406408. 864 |
| M372T413   | 372. 0992211 | 413. 006 | 1868064. 801 |
| M372T415   | 372. 1254174 | 414. 571 | 928028. 7371 |
| M372T370   | 372. 1274558 | 370. 115 | 16843464. 26 |
| M372T358_2 | 372. 1273554 | 357. 746 | 13493423. 49 |
| M372T240   | 372. 1289221 | 239. 574 | 374678. 2023 |
| M372T309   | 372. 136644  | 309. 091 | 1803496. 56  |

|            |              |          |              |
|------------|--------------|----------|--------------|
| M372T197   | 372. 1391614 | 197. 335 | 260846. 8702 |
| M372T416   | 372. 1366831 | 416. 128 | 576543. 4081 |
| M372T710   | 372. 1508714 | 710. 246 | 3864254. 495 |
| M372T744   | 372. 1592805 | 744. 192 | 87927. 93876 |
| M372T721   | 372. 1593072 | 721. 058 | 642227. 9282 |
| M372T701   | 372. 1597145 | 701. 149 | 580630. 0271 |
| M372T735   | 372. 1591817 | 734. 901 | 216412. 5235 |
| M372T584   | 372. 1657319 | 584. 484 | 1015979. 865 |
| M372T723   | 372. 1988894 | 722. 604 | 1553595. 419 |
| M372T741   | 372. 1988487 | 741. 077 | 2925994. 95  |
| M372T756   | 372. 198951  | 756. 343 | 1960461. 816 |
| M372T811   | 372. 2027599 | 811. 292 | 4087798. 303 |
| M372T732   | 372. 19881   | 731. 793 | 2935577. 575 |
| M372T829   | 372. 2027427 | 829. 321 | 2978679. 235 |
| M373T378   | 373. 0652557 | 377. 64  | 977114. 1197 |
| M373T317   | 373. 0764631 | 316. 709 | 1141221. 818 |
| M373T455   | 373. 0925535 | 454. 645 | 553664. 0464 |
| M373T172   | 373. 0883498 | 171. 546 | 3451116. 846 |
| M373T466_1 | 373. 0926642 | 465. 575 | 306367. 8852 |
| M373T379   | 373. 1132498 | 379. 066 | 3323832. 425 |
| M373T362   | 373. 1131388 | 362. 384 | 1795867. 043 |
| M373T750   | 373. 1321123 | 750. 298 | 12369359. 24 |
| M373T568   | 373. 1262415 | 567. 543 | 1220223. 47  |
| M373T584   | 373. 1303478 | 584. 484 | 3071865. 489 |
| M373T106   | 373. 1346701 | 105. 537 | 5401648. 238 |
| M373T370   | 373. 1342575 | 370. 115 | 2509199. 856 |
| M373T358   | 373. 1346017 | 357. 746 | 2131821. 579 |
| M373T472   | 373. 1499849 | 471. 768 | 8164719. 975 |
| M373T520   | 373. 1496979 | 519. 998 | 2547353. 455 |
| M373T710   | 373. 1535749 | 710. 246 | 486573. 3501 |
| M373T441_1 | 373. 1499395 | 440. 833 | 1818036. 883 |
| M373T489_1 | 373. 1499731 | 488. 885 | 5428303. 899 |
| M373T501   | 373. 1499703 | 501. 318 | 3079779. 051 |
| M373T461   | 373. 1499065 | 460. 89  | 1302180. 788 |
| M373T674   | 373. 1620337 | 673. 771 | 80901590. 98 |
| M373T769   | 373. 1671098 | 768. 696 | 2459319. 067 |
| M373T580   | 373. 1704908 | 579. 883 | 782457. 9834 |
| M373T738   | 373. 1653607 | 737. 955 | 5215332. 504 |
| M373T597   | 373. 1655361 | 596. 795 | 1509644. 579 |
| M373T691   | 373. 1679156 | 691. 303 | 1719784. 325 |
| M373T466_2 | 373. 1833082 | 465. 575 | 1460063. 35  |
| M373T441_2 | 373. 1858556 | 440. 833 | 879395. 5388 |
| M373T489_2 | 373. 1857123 | 488. 885 | 1198125. 814 |
| M374T712   | 373. 8740185 | 711. 794 | 411668. 6139 |
| M374T226   | 373. 9167369 | 225. 965 | 667815. 8453 |
| M374T442   | 374. 0058281 | 442. 399 | 697658. 5153 |
| M374T359   | 374. 0438028 | 359. 297 | 1826765. 346 |
| M374T191   | 374. 0488655 | 191. 259 | 830873. 0655 |
| M374T391   | 374. 0712386 | 391. 341 | 1217876. 715 |
| M374T121   | 374. 0935702 | 120. 945 | 5406529. 719 |
| M374T143   | 374. 0934525 | 143. 174 | 12733287. 21 |
| M374T172   | 374. 0934415 | 171. 546 | 1769703. 721 |
| M374T155   | 374. 0934896 | 155. 033 | 5108758. 838 |
| M374T108   | 374. 0935026 | 108. 082 | 10796049. 74 |



|          |              |          |              |
|----------|--------------|----------|--------------|
| M374T293 | 374. 1071363 | 292. 621 | 913079. 944  |
| M374T378 | 374. 1167766 | 377. 64  | 786392. 5928 |
| M374T643 | 374. 1434093 | 643. 166 | 1086070. 876 |
| M374T321 | 374. 144249  | 321. 312 | 3485992. 405 |
| M374T308 | 374. 1448812 | 307. 616 | 3980747. 219 |
| M374T364 | 374. 1450334 | 363. 928 | 1154062. 491 |
| M374T674 | 374. 1725128 | 673. 771 | 12635954. 97 |
| M374T720 | 374. 1774131 | 719. 505 | 1019802. 781 |
| M374T787 | 374. 2154499 | 787. 078 | 8847359. 903 |
| M374T750 | 374. 2153732 | 750. 298 | 6741442. 225 |
| M374T804 | 374. 241415  | 803. 615 | 1611955. 467 |
| M375T416 | 375. 0939609 | 416. 128 | 208485. 4477 |
| M375T151 | 375. 094001  | 150. 528 | 8427919. 404 |
| M375T137 | 375. 0938568 | 137. 226 | 6260742. 103 |
| M375T427 | 375. 1049767 | 426. 913 | 1025997. 528 |
| M375T399 | 375. 1049816 | 399. 086 | 2951145. 643 |
| M375T317 | 375. 1026379 | 316. 709 | 830107. 8892 |
| M375T376 | 375. 1051493 | 376. 15  | 738132. 0884 |
| M375T410 | 375. 1205221 | 409. 881 | 539208. 7733 |
| M375T337 | 375. 1219886 | 336. 681 | 1023684. 089 |
| M375T378 | 375. 1272534 | 377. 64  | 788992. 6067 |
| M375T321 | 375. 1285836 | 321. 312 | 3794922. 429 |
| M375T388 | 375. 1357633 | 388. 326 | 1535827. 221 |
| M375T352 | 375. 1360465 | 351. 663 | 765284. 3149 |
| M375T294 | 375. 1395784 | 294. 152 | 426959. 7039 |
| M375T537 | 375. 1439995 | 537. 051 | 14754199. 15 |
| M375T581 | 375. 14393   | 581. 442 | 2069685. 69  |
| M375T522 | 375. 1439076 | 521. 5   | 3719397. 699 |
| M375T556 | 375. 1440433 | 555. 524 | 12608383. 29 |
| M375T489 | 375. 1441235 | 488. 885 | 7394866. 168 |
| M375T532 | 375. 1570975 | 532. 372 | 1886230. 062 |
| M375T661 | 375. 1643123 | 661. 453 | 1845277. 037 |
| M375T470 | 375. 1637514 | 470. 253 | 6222838. 201 |
| M375T490 | 375. 1636574 | 490. 434 | 12769221. 84 |
| M375T672 | 375. 1661657 | 672. 229 | 3749201. 296 |
| M375T402 | 375. 1658809 | 402. 144 | 4031402. 73  |
| M375T349 | 375. 1749433 | 348. 668 | 3288514. 994 |
| M375T696 | 375. 1769325 | 695. 893 | 4637779. 056 |
| M375T623 | 375. 1828501 | 623. 098 | 11333675. 98 |
| M375T637 | 375. 1806686 | 636. 925 | 18571245. 15 |
| M375T796 | 375. 1837813 | 796. 202 | 7829113. 816 |
| M375T643 | 375. 1925077 | 643. 166 | 697571. 4155 |
| M375T801 | 375. 2162955 | 800. 683 | 5053256. 928 |
| M375T750 | 375. 2237133 | 750. 298 | 1080311. 73  |
| M375T758 | 375. 2236809 | 757. 881 | 756831. 5324 |
| M375T811 | 375. 273204  | 811. 292 | 6287411. 406 |
| M375T69  | 375. 4024497 | 69. 1983 | 452479. 3043 |
| M376T376 | 376. 0851257 | 376. 15  | 1531794. 742 |
| M376T184 | 376. 0889154 | 183. 708 | 2579853. 254 |
| M376T410 | 376. 0881116 | 409. 881 | 1850271. 521 |
| M376T172 | 376. 0889628 | 171. 546 | 540271. 4797 |
| M376T472 | 376. 101095  | 471. 768 | 640574. 8085 |
| M376T372 | 376. 1001989 | 371. 633 | 658408. 7062 |
| M376T106 | 376. 1235388 | 105. 537 | 844537. 6818 |

|            |              |          |              |
|------------|--------------|----------|--------------|
| M376T370   | 376. 1253681 | 370. 115 | 1034054. 245 |
| M376T343   | 376. 125351  | 342. 819 | 1090297. 37  |
| M376T324   | 376. 1226453 | 324. 413 | 2075385. 352 |
| M376T312   | 376. 1253305 | 312. 058 | 632966. 9142 |
| M376T170   | 376. 1235546 | 170. 049 | 1113046. 227 |
| M376T411_1 | 376. 1347641 | 411. 444 | 395685. 7475 |
| M376T537   | 376. 1453432 | 537. 051 | 5905341. 081 |
| M376T411_2 | 376. 1627673 | 411. 444 | 2826923. 231 |
| M376T344   | 376. 1589716 | 344. 233 | 703631. 8744 |
| M376T424   | 376. 1590115 | 423. 877 | 633629. 0485 |
| M376T623   | 376. 1903858 | 623. 098 | 1185209. 26  |
| M376T741   | 376. 1972176 | 741. 077 | 671853. 0129 |
| M376T490   | 376. 1952771 | 490. 434 | 1502000. 054 |
| M376T801   | 376. 227216  | 800. 683 | 747193. 5987 |
| M376T767   | 376. 2339302 | 767. 145 | 2333257. 305 |
| M376T786   | 376. 2335941 | 785. 593 | 23941501. 3  |
| M377T835_1 | 377. 0298844 | 835. 329 | 544748. 4343 |
| M377T71    | 377. 049117  | 70. 607  | 4513527. 448 |
| M377T140   | 377. 0854424 | 140. 209 | 12057523. 41 |
| M377T100   | 377. 0798104 | 100. 283 | 331452308. 8 |
| M377T128   | 377. 0853768 | 128. 279 | 31350071. 65 |
| M377T779   | 377. 0847579 | 779. 407 | 3607209. 053 |
| M377T835_2 | 377. 0846906 | 835. 329 | 5569295. 353 |
| M377T102   | 377. 0912501 | 101. 563 | 169614593. 2 |
| M377T260   | 377. 0966703 | 259. 983 | 91746. 39982 |
| M377T346   | 377. 105548  | 345. 761 | 1587117. 134 |
| M377T364   | 377. 1061018 | 363. 928 | 2412841. 353 |
| M377T724   | 377. 1139669 | 724. 158 | 733314. 427  |
| M377T712   | 377. 1141293 | 711. 794 | 2769920. 49  |
| M377T184   | 377. 1183034 | 183. 708 | 1156243. 333 |
| M377T458   | 377. 1200839 | 457. 763 | 1469116. 884 |
| M377T296   | 377. 1190326 | 295. 704 | 724794. 1555 |
| M377T552_1 | 377. 1524636 | 552. 493 | 929816. 7822 |
| M377T352   | 377. 1531284 | 351. 663 | 682691. 7037 |
| M377T532   | 377. 1593477 | 532. 372 | 12616581. 71 |
| M377T618   | 377. 1552593 | 618. 45  | 531093. 146  |
| M377T411   | 377. 166945  | 411. 444 | 511823. 1974 |
| M377T562   | 377. 1810519 | 561. 624 | 6669974. 568 |
| M377T473   | 377. 1808985 | 473. 329 | 75756291. 57 |
| M377T438   | 377. 1808541 | 437. 734 | 6917502. 73  |
| M377T508   | 377. 1809071 | 507. 55  | 14273222. 79 |
| M377T529   | 377. 1809325 | 529. 248 | 6117526. 814 |
| M377T489   | 377. 180918  | 488. 885 | 18098570. 61 |
| M377T796_1 | 377. 1800417 | 796. 202 | 819247. 024  |
| M377T552_2 | 377. 1809903 | 552. 493 | 13243400. 18 |
| M377T387   | 377. 1808898 | 386. 78  | 2311260. 493 |
| M377T405   | 377. 1808877 | 405. 254 | 3141227. 485 |
| M377T461   | 377. 1809146 | 460. 89  | 14929330. 33 |
| M377T539   | 377. 1894083 | 538. 619 | 1722156. 36  |
| M377T736   | 377. 1926846 | 736. 458 | 1249388. 102 |
| M377T384   | 377. 1921985 | 383. 727 | 2150008. 416 |
| M377T372   | 377. 1945509 | 371. 633 | 1032411. 521 |
| M377T367   | 377. 2180771 | 367. 026 | 1066067. 381 |
| M377T766   | 377. 2695991 | 765. 588 | 33103631. 88 |

|            |              |          |              |
|------------|--------------|----------|--------------|
| M377T778   | 377. 2695884 | 777. 92  | 32111503. 82 |
| M377T796_2 | 377. 2696134 | 796. 202 | 71221852. 54 |
| M377T825   | 377. 2695812 | 824. 864 | 115757724. 2 |
| M377T835_3 | 377. 2696239 | 835. 329 | 152158237. 9 |
| M377T807   | 377. 2747568 | 806. 698 | 144295634. 7 |
| M377T835_4 | 377. 2807394 | 835. 329 | 13220106. 76 |
| M378T823   | 377. 5136708 | 823. 375 | 236236. 9698 |
| M378T835_1 | 377. 5135555 | 835. 329 | 255422. 2823 |
| M378T710   | 378. 0447223 | 710. 246 | 980736. 8143 |
| M378T205   | 378. 0656893 | 204. 895 | 2845501. 64  |
| M378T338   | 378. 0656445 | 338. 222 | 670085. 2599 |
| M378T352   | 378. 0657985 | 351. 663 | 1118417. 087 |
| M378T365   | 378. 0683452 | 365. 475 | 1473854. 989 |
| M378T119   | 378. 0863584 | 119. 413 | 9541351. 847 |
| M378T102   | 378. 0865188 | 101. 563 | 38632367. 05 |
| M378T94    | 378. 0863464 | 94. 1615 | 22744566. 04 |
| M378T128   | 378. 0864442 | 128. 279 | 2541469. 814 |
| M378T139   | 378. 0865324 | 138. 719 | 1416952. 61  |
| M378T199   | 378. 0935039 | 198. 821 | 860748. 0585 |
| M378T369_1 | 378. 1023742 | 368. 559 | 6992639. 936 |
| M378T498   | 378. 1178323 | 498. 202 | 962425. 6852 |
| M378T369_2 | 378. 112774  | 368. 559 | 2047867. 774 |
| M378T398   | 378. 1180359 | 397. 585 | 7233086. 608 |
| M378T427   | 378. 1180085 | 426. 913 | 2620084. 648 |
| M378T264   | 378. 1387699 | 263. 845 | 339078. 205  |
| M378T258   | 378. 1389422 | 258. 208 | 1006310. 175 |
| M378T315   | 378. 1414869 | 315. 162 | 4039626. 621 |
| M378T229   | 378. 1407278 | 228. 961 | 979512. 6256 |
| M378T337   | 378. 1376973 | 336. 681 | 889610. 6405 |
| M378T146   | 378. 1388599 | 146. 08  | 589224. 8966 |
| M378T303   | 378. 1389764 | 303. 259 | 29815934. 26 |
| M378T170   | 378. 1388518 | 170. 049 | 534996. 0241 |
| M378T411   | 378. 1573712 | 411. 444 | 566718. 1984 |
| M378T532   | 378. 1636258 | 532. 372 | 2390568. 586 |
| M378T376   | 378. 1754715 | 376. 15  | 288585. 8249 |
| M378T473   | 378. 1834062 | 473. 329 | 14027995. 66 |
| M378T508   | 378. 1834098 | 507. 55  | 2631895. 344 |
| M378T489   | 378. 185109  | 488. 885 | 3705960. 012 |
| M378T405   | 378. 1833735 | 405. 254 | 464497. 586  |
| M378T461   | 378. 18353   | 460. 89  | 2621697. 908 |
| M378T385   | 378. 1920975 | 385. 225 | 301616. 8812 |
| M378T413   | 378. 2296136 | 413. 006 | 176346. 015  |
| M378T807   | 378. 2418964 | 806. 698 | 2749162. 744 |
| M378T816   | 378. 2476834 | 815. 664 | 3158840. 389 |
| M378T769   | 378. 2736112 | 768. 696 | 7704743. 359 |
| M378T810   | 378. 272678  | 809. 797 | 25772834. 14 |
| M378T795   | 378. 2727671 | 794. 753 | 14108860. 31 |
| M378T826   | 378. 2726915 | 826. 333 | 33815491. 07 |
| M378T741   | 378. 2764591 | 741. 077 | 2909189. 631 |
| M378T756   | 378. 2768825 | 756. 343 | 4729763. 444 |
| M378T720   | 378. 2732262 | 719. 505 | 1090871. 282 |
| M378T835_2 | 378. 2727451 | 835. 329 | 33278962. 59 |
| M379T31    | 378. 9780705 | 31. 4228 | 375847. 2863 |
| M379T814_1 | 378. 9991346 | 814. 118 | 1265967. 821 |

|            |              |          |              |
|------------|--------------|----------|--------------|
| M379T87    | 379. 0226405 | 87. 426  | 11854501. 33 |
| M379T205   | 379. 0699113 | 204. 895 | 449818. 4253 |
| M379T102   | 379. 0790831 | 101. 563 | 83050316. 42 |
| M379T94    | 379. 0787725 | 94. 1615 | 47975849. 86 |
| M379T137   | 379. 0790569 | 137. 226 | 21875049. 14 |
| M379T831   | 379. 0812923 | 830. 813 | 2600858. 179 |
| M379T817   | 379. 0813727 | 817. 214 | 4073699. 611 |
| M379T779   | 379. 0827445 | 779. 407 | 1397552. 778 |
| M379T353   | 379. 1005248 | 353. 163 | 609802. 2537 |
| M379T294   | 379. 0986112 | 294. 152 | 731418. 341  |
| M379T712   | 379. 1099307 | 711. 794 | 666102. 9108 |
| M379T455   | 379. 112792  | 454. 645 | 330844. 2324 |
| M379T554   | 379. 1138195 | 554. 027 | 210280. 8398 |
| M379T398   | 379. 1219276 | 397. 585 | 1202528. 018 |
| M379T466   | 379. 1241059 | 465. 575 | 629841. 4196 |
| M379T303   | 379. 1435218 | 303. 259 | 4617333. 289 |
| M379T433   | 379. 1593122 | 433. 06  | 1515498. 942 |
| M379T350   | 379. 1594129 | 350. 108 | 1303913. 359 |
| M379T404   | 379. 161766  | 403. 698 | 3598837. 457 |
| M379T418   | 379. 16186   | 417. 689 | 3775067. 137 |
| M379T308   | 379. 1687774 | 307. 616 | 6041687. 488 |
| M379T411   | 379. 1746951 | 411. 444 | 119136. 4818 |
| M379T540   | 379. 1722856 | 540. 152 | 1203304. 864 |
| M379T206   | 379. 1714379 | 206. 399 | 319858. 2456 |
| M379T489   | 379. 1854693 | 488. 885 | 695790. 7788 |
| M379T508   | 379. 1855338 | 507. 55  | 622228. 9532 |
| M379T597   | 379. 1875423 | 596. 795 | 157482. 0688 |
| M379T472   | 379. 1931396 | 471. 768 | 1045374. 531 |
| M379T436   | 379. 1987656 | 436. 18  | 5168732. 915 |
| M379T531   | 379. 1980423 | 530. 804 | 5250145. 142 |
| M379T787   | 379. 2065984 | 787. 078 | 6337830. 486 |
| M379T813   | 379. 2327717 | 812. 68  | 636239745. 3 |
| M379T837   | 379. 2329974 | 836. 769 | 36793535. 69 |
| M379T822   | 379. 2677985 | 821. 831 | 1503204. 107 |
| M379T835_1 | 379. 2677212 | 835. 329 | 3213411. 291 |
| M379T823   | 379. 2786348 | 823. 375 | 2590780. 834 |
| M379T835_2 | 379. 2785633 | 835. 329 | 3698873. 994 |
| M379T814_2 | 379. 4785197 | 814. 118 | 1390727. 678 |
| M380T102   | 380. 0850691 | 101. 563 | 12565664. 93 |
| M380T347   | 380. 0800787 | 347. 166 | 758395. 5895 |
| M380T294   | 380. 0832854 | 294. 152 | 797153. 3534 |
| M380T311   | 380. 0948147 | 310. 626 | 3491205. 299 |
| M380T321   | 380. 0948559 | 321. 312 | 826858. 5903 |
| M380T476   | 380. 1185836 | 476. 451 | 257388. 169  |
| M380T221   | 380. 1328199 | 221. 453 | 510223. 9316 |
| M380T419   | 380. 1318236 | 419. 237 | 3266374. 194 |
| M380T503   | 380. 1327518 | 502. 873 | 1248980. 54  |
| M380T394   | 380. 1404904 | 394. 467 | 1147538. 604 |
| M380T407   | 380. 1447669 | 406. 813 | 774016. 4189 |
| M380T249   | 380. 1542373 | 248. 622 | 130353. 863  |
| M380T552   | 380. 1555341 | 552. 493 | 2823179. 043 |
| M380T531   | 380. 1974262 | 530. 804 | 809967. 1693 |
| M380T449   | 380. 2274049 | 448. 527 | 538536. 286  |
| M380T813   | 380. 2347905 | 812. 68  | 153555724. 8 |

|            |              |          |              |
|------------|--------------|----------|--------------|
| M381T439   | 381. 0937667 | 439. 27  | 706881. 5188 |
| M381T147   | 381. 1005374 | 147. 455 | 2876372. 756 |
| M381T107   | 381. 1000864 | 106. 648 | 11599715. 23 |
| M381T296   | 381. 1028325 | 295. 704 | 1473117. 753 |
| M381T433   | 381. 1308431 | 433. 06  | 1238471. 846 |
| M381T441   | 381. 1307299 | 440. 833 | 979586. 2519 |
| M381T318   | 381. 1382141 | 318. 232 | 2841136. 846 |
| M381T341   | 381. 1505274 | 341. 266 | 649098. 1139 |
| M381T416   | 381. 164827  | 416. 128 | 192031. 7457 |
| M381T534   | 381. 1748415 | 533. 931 | 1188486. 752 |
| M381T459   | 381. 1753399 | 459. 324 | 1965126. 897 |
| M381T427   | 381. 1815328 | 426. 913 | 682685. 7322 |
| M381T501   | 381. 1892591 | 501. 318 | 297964. 3538 |
| M381T617   | 381. 2063735 | 616. 891 | 199977. 7837 |
| M381T557   | 381. 2142554 | 557. 078 | 542337. 3649 |
| M381T811_1 | 381. 2281506 | 811. 292 | 38920861. 22 |
| M381T811_2 | 381. 2388861 | 811. 292 | 6841785. 975 |
| M382T609   | 382. 0360496 | 609. 19  | 2220627. 571 |
| M382T329   | 382. 1005419 | 328. 999 | 816075. 3296 |
| M382T161   | 382. 0978902 | 161. 184 | 466684. 0592 |
| M382T175   | 382. 0979088 | 174. 576 | 2587329. 951 |
| M382T346   | 382. 1136647 | 345. 761 | 1135156. 085 |
| M382T379   | 382. 1583162 | 379. 066 | 162061. 7039 |
| M382T811   | 382. 2308592 | 811. 292 | 8801881. 765 |
| M383T526   | 383. 0882374 | 526. 124 | 164946. 2534 |
| M383T253   | 383. 1183882 | 252. 703 | 3370956. 625 |
| M383T293   | 383. 1182596 | 292. 621 | 7332595. 255 |
| M383T98    | 383. 1165976 | 97. 682  | 73447334. 98 |
| M383T320   | 383. 1165069 | 319. 785 | 924029. 933  |
| M383T532   | 383. 1252965 | 532. 372 | 1285463. 501 |
| M383T376   | 383. 1419891 | 376. 15  | 579632. 2637 |
| M383T456   | 383. 1459933 | 456. 2   | 1454034. 672 |
| M383T401   | 383. 1493089 | 400. 641 | 778928. 4787 |
| M383T346   | 383. 1542536 | 345. 761 | 700405. 0392 |
| M383T805   | 383. 1733428 | 805. 145 | 967037. 2296 |
| M383T675_1 | 383. 1681613 | 675. 322 | 5264536. 539 |
| M383T675_2 | 383. 1805888 | 675. 322 | 189642. 1018 |
| M383T411   | 383. 1930079 | 411. 444 | 791992. 3181 |
| M383T615   | 383. 205545  | 615. 38  | 1189117. 594 |
| M383T811   | 383. 2350227 | 811. 292 | 298680. 7127 |
| M383T749   | 383. 2428906 | 748. 742 | 10128848. 75 |
| M383T832   | 383. 3495334 | 832. 338 | 55663652. 37 |
| M383T778   | 383. 353134  | 777. 92  | 7486922. 141 |
| M384T163   | 384. 0803956 | 162. 615 | 16412523. 65 |
| M384T109   | 384. 0766572 | 109. 475 | 2691108. 604 |
| M384T130   | 384. 079591  | 129. 827 | 4069005. 006 |
| M384T294   | 384. 0909111 | 294. 152 | 275070. 5586 |
| M384T232   | 384. 1141844 | 231. 973 | 675283. 7548 |
| M384T252   | 384. 1214849 | 251. 727 | 175342. 8167 |
| M384T407   | 384. 1269778 | 406. 813 | 1052770. 593 |
| M384T450   | 384. 1270219 | 450. 052 | 3107946. 993 |
| M384T226   | 384. 1286275 | 225. 965 | 159305. 211  |
| M384T317   | 384. 1337128 | 316. 709 | 1031694. 408 |
| M384T388_1 | 384. 1285736 | 388. 326 | 849973. 1474 |

|            |              |          |              |
|------------|--------------|----------|--------------|
| M384T416   | 384. 1286294 | 416. 128 | 1150484. 126 |
| M384T347   | 384. 1339435 | 347. 166 | 672538. 9527 |
| M384T388_2 | 384. 1460462 | 388. 326 | 1007490. 005 |
| M384T419   | 384. 1498067 | 419. 237 | 1101503. 341 |
| M384T415   | 384. 1748482 | 414. 571 | 136339. 1198 |
| M384T675   | 384. 1765539 | 675. 322 | 737011. 2191 |
| M384T504   | 384. 1841015 | 504. 432 | 2970225. 039 |
| M384T749   | 384. 2446636 | 748. 742 | 2108483. 587 |
| M384T820   | 384. 3545332 | 820. 294 | 5529130. 871 |
| M384T804   | 384. 3544493 | 803. 615 | 6172770. 92  |
| M384T835   | 384. 3546368 | 835. 329 | 4671951. 537 |
| M385T242   | 385. 0475759 | 242. 223 | 674243. 8905 |
| M385T299   | 385. 0477042 | 298. 619 | 1262598. 418 |
| M385T293   | 385. 076438  | 292. 621 | 2279494. 886 |
| M385T161_1 | 385. 0799338 | 161. 184 | 1037870. 463 |
| M385T495   | 385. 0861068 | 495. 125 | 692638. 9025 |
| M385T161_2 | 385. 0965111 | 161. 184 | 3118028. 581 |
| M385T208   | 385. 1103825 | 207. 935 | 3565369. 722 |
| M385T197   | 385. 1103859 | 197. 335 | 1848495. 374 |
| M385T220   | 385. 1102335 | 219. 979 | 2117153. 904 |
| M385T108   | 385. 104994  | 108. 082 | 17637945. 02 |
| M385T413   | 385. 1167019 | 413. 006 | 1242029. 712 |
| M385T158   | 385. 1103464 | 158. 1   | 23835709. 19 |
| M385T470   | 385. 1165974 | 470. 253 | 1139479. 692 |
| M385T430   | 385. 1114214 | 429. 94  | 1432484. 788 |
| M385T320   | 385. 1120561 | 319. 785 | 3412071. 098 |
| M385T450   | 385. 1166305 | 450. 052 | 666000. 0042 |
| M385T654   | 385. 1265405 | 653. 835 | 281885. 5759 |
| M385T321   | 385. 1336642 | 321. 312 | 1805691. 469 |
| M385T418   | 385. 1508485 | 417. 689 | 128960. 3117 |
| M385T749   | 385. 1615462 | 748. 742 | 5972192. 114 |
| M385T770   | 385. 1616755 | 770. 235 | 889007. 3566 |
| M385T419   | 385. 1623373 | 419. 237 | 2025219. 409 |
| M385T807   | 385. 1711964 | 806. 698 | 511978. 8769 |
| M385T504   | 385. 1874677 | 504. 432 | 309756. 3731 |
| M385T720   | 385. 18576   | 719. 505 | 12056399. 58 |
| M385T591   | 385. 1973431 | 590. 717 | 1094027. 356 |
| M385T634   | 385. 2214214 | 633. 832 | 1093781. 395 |
| M385T766   | 385. 25671   | 765. 588 | 2120537. 409 |
| M385T378   | 385. 2556373 | 377. 64  | 1644532. 267 |
| M385T834   | 385. 3332481 | 833. 866 | 376109. 4173 |
| M386T119_1 | 385. 844111  | 119. 413 | 258757. 4125 |
| M386T466   | 386. 0692751 | 465. 575 | 2960028. 424 |
| M386T163   | 386. 0924469 | 162. 615 | 47219243. 08 |
| M386T329_1 | 386. 0874534 | 328. 999 | 21257995. 68 |
| M386T119_2 | 386. 0924767 | 119. 413 | 200145961. 1 |
| M386T179   | 386. 0924783 | 179. 046 | 38828086. 7  |
| M386T146   | 386. 0924845 | 146. 08  | 80307041. 06 |
| M386T108   | 386. 0923921 | 108. 082 | 148101871    |
| M386T296   | 386. 0924577 | 295. 704 | 20356845. 29 |
| M386T329_2 | 386. 1041809 | 328. 999 | 1085396. 264 |
| M386T158   | 386. 1123216 | 158. 1   | 948586. 6587 |
| M386T349   | 386. 1447239 | 348. 668 | 1297425. 046 |
| M386T520   | 386. 1428966 | 519. 998 | 1425004. 153 |

|            |              |          |              |
|------------|--------------|----------|--------------|
| M386T413   | 386. 1464415 | 413. 006 | 9748040. 472 |
| M386T441   | 386. 1552735 | 440. 833 | 36167. 21146 |
| M386T416   | 386. 162503  | 416. 128 | 875486. 8181 |
| M386T749   | 386. 1718889 | 748. 742 | 938287. 2529 |
| M386T720   | 386. 1881264 | 719. 505 | 2126666. 718 |
| M386T320   | 386. 1914341 | 319. 785 | 315656. 0405 |
| M386T746   | 386. 2329434 | 745. 747 | 3696535. 79  |
| M386T813   | 386. 2904531 | 812. 68  | 209927. 9153 |
| M387T102_1 | 386. 8679165 | 101. 563 | 26022524. 99 |
| M387T95    | 386. 867973  | 95. 2383 | 37193368. 26 |
| M387T329   | 387. 0939894 | 328. 999 | 3337655. 432 |
| M387T179   | 387. 0963201 | 179. 046 | 5083619. 754 |
| M387T163   | 387. 10177   | 162. 615 | 8101045. 16  |
| M387T119   | 387. 1017719 | 119. 413 | 82094491. 09 |
| M387T102_2 | 387. 1012809 | 101. 563 | 924760580. 7 |
| M387T202   | 387. 1013261 | 201. 897 | 2318439. 751 |
| M387T214   | 387. 1013835 | 213. 897 | 2103389. 413 |
| M387T294   | 387. 1015682 | 294. 152 | 2434428. 716 |
| M387T146   | 387. 1016113 | 146. 08  | 17700714. 69 |
| M387T94_1  | 387. 1126565 | 94. 1615 | 11242142074  |
| M387T793   | 387. 1083267 | 793. 233 | 9041449. 789 |
| M387T188   | 387. 1127036 | 188. 174 | 12233185. 42 |
| M387T811   | 387. 1087791 | 811. 292 | 9495391. 965 |
| M387T396   | 387. 1099274 | 396. 023 | 2964870. 281 |
| M387T83    | 387. 112575  | 82. 8986 | 21658692. 9  |
| M387T822   | 387. 1126051 | 821. 831 | 20316159. 95 |
| M387T278   | 387. 1126753 | 278. 267 | 11345756. 26 |
| M387T804   | 387. 1091033 | 803. 615 | 8595278. 247 |
| M387T320   | 387. 112822  | 319. 785 | 5192625. 13  |
| M387T240   | 387. 1127288 | 239. 574 | 9131827. 378 |
| M387T835   | 387. 1127642 | 835. 329 | 18160589. 01 |
| M387T166   | 387. 1126045 | 165. 522 | 17230488. 29 |
| M387T102_3 | 387. 1126375 | 101. 563 | 11120577283  |
| M387T293   | 387. 112603  | 292. 621 | 11747938. 98 |
| M387T450_1 | 387. 1196883 | 450. 052 | 3965734. 131 |
| M387T408   | 387. 1288437 | 408. 368 | 8696770. 63  |
| M387T450_2 | 387. 135482  | 450. 052 | 2298272. 05  |
| M387T212   | 387. 1397234 | 212. 366 | 207558. 8373 |
| M387T411   | 387. 14531   | 411. 444 | 1027396. 538 |
| M387T663   | 387. 1433498 | 663. 008 | 1384099. 66  |
| M387T681   | 387. 143322  | 681. 406 | 1205374. 581 |
| M387T648   | 387. 1433367 | 647. 653 | 2252719. 378 |
| M387T618   | 387. 1433587 | 618. 45  | 5100152. 801 |
| M387T419   | 387. 1630681 | 419. 237 | 699273. 8302 |
| M387T819   | 387. 1795867 | 818. 743 | 3034925. 445 |
| M387T446   | 387. 1746922 | 445. 522 | 577492. 0757 |
| M387T730   | 387. 2011776 | 730. 264 | 2235822. 712 |
| M387T746   | 387. 2336867 | 745. 747 | 889465. 2853 |
| M387T100   | 387. 3620924 | 100. 283 | 33043295. 36 |
| M387T94_2  | 387. 3618853 | 94. 1615 | 33834734. 33 |
| M388T446   | 388. 0878841 | 445. 522 | 1413356. 7   |
| M388T234   | 388. 08805   | 233. 519 | 1271011. 096 |
| M388T254   | 388. 0880362 | 253. 674 | 400123. 416  |
| M388T329   | 388. 0978839 | 328. 999 | 675031. 8092 |

|           |              |          |              |
|-----------|--------------|----------|--------------|
| M388T145  | 388. 1051443 | 144. 706 | 7382649. 967 |
| M388T290  | 388. 1078331 | 289. 534 | 260224. 5477 |
| M388T206  | 388. 1051963 | 206. 399 | 1792665. 814 |
| M388T173  | 388. 105358  | 173. 092 | 2113734. 91  |
| M388T118  | 388. 1050095 | 117. 954 | 17707333. 18 |
| M388T160  | 388. 1050237 | 159. 635 | 1545373. 061 |
| M388T102  | 388. 1151433 | 101. 563 | 1610740982   |
| M388T94   | 388. 1151707 | 94. 1615 | 1616322634   |
| M388T657  | 388. 1169334 | 656. 84  | 248047. 6077 |
| M388T835  | 388. 1161463 | 835. 329 | 4383006. 306 |
| M388T314  | 388. 1220961 | 313. 612 | 3403763. 703 |
| M388T134  | 388. 1241598 | 134. 253 | 28532388. 09 |
| M388T154  | 388. 1202798 | 153. 601 | 2107675. 132 |
| M388T407  | 388. 1236455 | 406. 813 | 2085428. 428 |
| M388T618  | 388. 1463416 | 618. 45  | 1001590. 246 |
| M388T356  | 388. 1590328 | 356. 274 | 574711. 0827 |
| M388T462  | 388. 1734769 | 462. 446 | 183628. 6523 |
| M388T773  | 388. 190037  | 773. 333 | 1954574. 719 |
| M388T752  | 388. 194878  | 751. 766 | 1802874. 687 |
| M388T638  | 388. 1948982 | 638. 484 | 2436916. 32  |
| M389T391  | 389. 082937  | 391. 341 | 1052627. 685 |
| M389T378  | 389. 0859365 | 377. 64  | 412925. 2401 |
| M389T432  | 389. 1051311 | 431. 507 | 1059650. 741 |
| M389T449  | 389. 1050307 | 448. 527 | 878231. 2053 |
| M389T251  | 389. 1070565 | 251. 004 | 151007. 935  |
| M389T280  | 389. 1110832 | 279. 68  | 403055. 6016 |
| M389T102  | 389. 1158831 | 101. 563 | 349070722    |
| M389T94_1 | 389. 1158565 | 94. 1615 | 354555382. 8 |
| M389T473  | 389. 1164451 | 473. 329 | 521111. 1394 |
| M389T343  | 389. 1195033 | 342. 819 | 8930664. 035 |
| M389T407  | 389. 1223559 | 406. 813 | 16891541. 36 |
| M389T498  | 389. 1232214 | 498. 202 | 1386896. 354 |
| M389T127  | 389. 1236439 | 126. 755 | 2955848. 983 |
| M389T672  | 389. 1234849 | 672. 229 | 9330414. 731 |
| M389T690  | 389. 1234159 | 689. 75  | 1259079. 055 |
| M389T94_2 | 389. 1268124 | 94. 1615 | 134659625. 7 |
| M389T369  | 389. 1452626 | 368. 559 | 926362. 3974 |
| M389T453  | 389. 1423436 | 453. 126 | 1647163. 205 |
| M389T475  | 389. 1434022 | 474. 888 | 1569392. 349 |
| M389T418  | 389. 1423504 | 417. 689 | 4522916. 559 |
| M389T439  | 389. 1427351 | 439. 27  | 1787377. 339 |
| M389T464  | 389. 1469136 | 464. 011 | 435981. 3824 |
| M389T665  | 389. 1598783 | 664. 565 | 5298936. 522 |
| M389T595  | 389. 1597951 | 595. 35  | 43324906. 84 |
| M389T572  | 389. 1596466 | 572. 152 | 4596064. 725 |
| M389T631  | 389. 1597861 | 630. 737 | 40976189. 09 |
| M389T614  | 389. 1598028 | 613. 824 | 52151112. 97 |
| M389T779  | 389. 1598258 | 779. 407 | 2877883. 858 |
| M389T154  | 389. 1585431 | 153. 601 | 2132993. 171 |
| M389T169  | 389. 1595719 | 168. 507 | 1175288. 886 |
| M389T178  | 389. 1597095 | 177. 649 | 867105. 4247 |
| M389T107  | 389. 1670136 | 106. 648 | 6182131. 209 |
| M389T146  | 389. 1670842 | 146. 08  | 8364190. 539 |
| M389T155  | 389. 1700059 | 155. 033 | 5515432. 979 |



|            |              |          |              |
|------------|--------------|----------|--------------|
| M389T469   | 389. 1796864 | 468. 69  | 320559. 6797 |
| M389T820   | 389. 1944446 | 820. 294 | 13602254. 54 |
| M389T385   | 389. 1924503 | 385. 225 | 5292335. 016 |
| M389T405   | 389. 2017348 | 405. 254 | 463862. 9477 |
| M389T638   | 389. 1999053 | 638. 484 | 300231. 4308 |
| M390T65_1  | 389. 9782995 | 65. 4825 | 4311737. 985 |
| M390T358   | 390. 0167299 | 357. 746 | 1845624. 115 |
| M390T217   | 390. 0277294 | 216. 95  | 1032872. 283 |
| M390T241   | 390. 0294273 | 240. 733 | 560528. 9622 |
| M390T71    | 390. 033192  | 70. 607  | 69033941. 93 |
| M390T793   | 390. 1043673 | 793. 233 | 465090. 8837 |
| M390T476   | 390. 1033673 | 476. 451 | 459397. 4717 |
| M390T387   | 390. 1025397 | 386. 78  | 629911. 2923 |
| M390T407_1 | 390. 1025848 | 406. 813 | 825240. 5288 |
| M390T102   | 390. 1193504 | 101. 563 | 44260911. 36 |
| M390T94    | 390. 1191934 | 94. 1615 | 39727260. 79 |
| M390T672   | 390. 1264196 | 672. 229 | 1856121. 081 |
| M390T343   | 390. 1207215 | 342. 819 | 1291739. 847 |
| M390T407_2 | 390. 1236323 | 406. 813 | 3924364. 074 |
| M390T95    | 390. 1309273 | 95. 2383 | 12335529. 29 |
| M390T194   | 390. 1498195 | 194. 243 | 2511926. 414 |
| M390T418   | 390. 1494012 | 417. 689 | 515479. 3175 |
| M390T211   | 390. 1499478 | 210. 883 | 5619813. 986 |
| M390T631_1 | 390. 1579206 | 630. 737 | 7441543. 743 |
| M390T614   | 390. 1593392 | 613. 824 | 9243680. 289 |
| M390T595   | 390. 1665564 | 595. 35  | 7496832. 542 |
| M390T631_2 | 390. 1687898 | 630. 737 | 5007251. 819 |
| M390T388   | 390. 1956632 | 388. 326 | 318088. 0149 |
| M390T601   | 390. 2103436 | 601. 473 | 12121738. 91 |
| M390T669   | 390. 2122562 | 669. 12  | 25985365. 16 |
| M390T594   | 390. 2122137 | 593. 841 | 24403682. 65 |
| M390T626   | 390. 212108  | 626. 183 | 4047197. 262 |
| M390T611   | 390. 2122065 | 610. 742 | 4872508. 194 |
| M390T720   | 390. 2123188 | 719. 505 | 1964643. 52  |
| M390T694   | 390. 2120889 | 694. 341 | 3165269. 042 |
| M390T740   | 390. 2120963 | 739. 509 | 7016090. 153 |
| M390T640   | 390. 2120873 | 640. 057 | 8721626. 843 |
| M390T66    | 390. 4315192 | 66. 2043 | 43840. 01833 |
| M390T65_2  | 390. 4809444 | 65. 4825 | 1081259. 989 |
| M391T69    | 390. 7795696 | 69. 1983 | 598937. 5961 |
| M391T71    | 391. 0286219 | 70. 607  | 260445186. 2 |
| M391T480   | 391. 0959263 | 479. 541 | 257809. 3177 |
| M391T535   | 391. 1097788 | 535. 488 | 1035597. 688 |
| M391T369   | 391. 1242397 | 368. 559 | 1063199. 266 |
| M391T297   | 391. 1254999 | 297. 149 | 1259562. 511 |
| M391T237   | 391. 1221017 | 236. 518 | 356066. 3439 |
| M391T284   | 391. 1231361 | 283. 634 | 579239. 1243 |
| M391T672   | 391. 1303649 | 672. 229 | 146518. 3966 |
| M391T439   | 391. 1275398 | 439. 27  | 5829070. 232 |
| M391T152   | 391. 1346531 | 152. 08  | 2884999. 948 |
| M391T472   | 391. 141191  | 471. 768 | 1122544. 361 |
| M391T450_1 | 391. 142793  | 450. 052 | 2160592. 961 |
| M391T413_1 | 391. 1523004 | 413. 006 | 1199065. 916 |
| M391T455   | 391. 1581894 | 454. 645 | 2558162. 717 |

|            |              |          |              |
|------------|--------------|----------|--------------|
| M391T356   | 391. 1579424 | 356. 274 | 2975441. 151 |
| M391T483   | 391. 158461  | 482. 656 | 2006028. 608 |
| M391T430   | 391. 15816   | 429. 94  | 4051517. 449 |
| M391T404   | 391. 1579862 | 403. 698 | 3580425. 462 |
| M391T614   | 391. 1641581 | 613. 824 | 1430659. 224 |
| M391T597   | 391. 1671853 | 596. 795 | 2092899. 171 |
| M391T537   | 391. 1746343 | 537. 051 | 669359. 5751 |
| M391T520   | 391. 1745239 | 519. 998 | 887465. 597  |
| M391T568   | 391. 1744864 | 567. 543 | 2481356. 261 |
| M391T583   | 391. 1744368 | 582. 96  | 47338277. 73 |
| M391T338   | 391. 1716017 | 338. 222 | 387216. 7184 |
| M391T554   | 391. 1798855 | 554. 027 | 1907208. 11  |
| M391T793   | 391. 1861175 | 793. 233 | 1402091. 233 |
| M391T450_2 | 391. 1894837 | 450. 052 | 385329. 8998 |
| M391T413_2 | 391. 1953761 | 413. 006 | 486105. 1873 |
| M391T473   | 391. 1981233 | 473. 329 | 572858. 1356 |
| M391T441   | 391. 1954375 | 440. 833 | 1124892. 241 |
| M391T669   | 391. 2134031 | 669. 12  | 4981195. 899 |
| M391T594   | 391. 2140139 | 593. 841 | 4433481. 923 |
| M391T611   | 391. 2140718 | 610. 742 | 672358. 0926 |
| M391T697   | 391. 21381   | 697. 061 | 336247. 93   |
| M391T424   | 391. 2083877 | 423. 877 | 5477021. 192 |
| M391T358   | 391. 20814   | 357. 746 | 1423924. 847 |
| M391T741   | 391. 2177588 | 741. 077 | 913502. 7764 |
| M391T408   | 391. 2192414 | 408. 368 | 714590. 3034 |
| M391T795   | 391. 2505515 | 794. 753 | 639149. 0919 |
| M391T837   | 391. 2523925 | 836. 769 | 1118216. 366 |
| M392T71    | 392. 0388901 | 70. 607  | 29029238. 2  |
| M392T346   | 392. 0812635 | 345. 761 | 742146. 1348 |
| M392T151   | 392. 0794231 | 150. 528 | 4208126. 668 |
| M392T137   | 392. 079493  | 137. 226 | 6935011. 055 |
| M392T416   | 392. 086873  | 416. 128 | 902434. 1254 |
| M392T378   | 392. 0877013 | 377. 64  | 357710. 4498 |
| M392T632   | 392. 0959937 | 632. 288 | 481144. 0499 |
| M392T415   | 392. 1179321 | 414. 571 | 1331671. 475 |
| M392T352   | 392. 1290808 | 351. 663 | 678453. 361  |
| M392T388   | 392. 135063  | 388. 326 | 496921. 8227 |
| M392T678   | 392. 1328262 | 678. 416 | 226192. 2625 |
| M392T449_1 | 392. 1452735 | 448. 527 | 576342. 5731 |
| M392T318   | 392. 1493819 | 318. 232 | 865667. 9839 |
| M392T187   | 392. 156652  | 186. 689 | 2424867. 646 |
| M392T472   | 392. 1544218 | 471. 768 | 1191199. 851 |
| M392T492   | 392. 15664   | 491. 99  | 4353816. 901 |
| M392T334   | 392. 1545753 | 333. 655 | 2425993. 236 |
| M392T405   | 392. 164281  | 405. 254 | 424156. 352  |
| M392T203   | 392. 1680791 | 203. 346 | 386983. 9239 |
| M392T449_2 | 392. 1804372 | 448. 527 | 842953. 1915 |
| M392T583   | 392. 1789581 | 582. 96  | 10073834. 61 |
| M392T430   | 392. 1847205 | 429. 94  | 737198. 8649 |
| M392T425   | 392. 2088608 | 425. 439 | 711256. 9262 |
| M392T703   | 392. 2304857 | 702. 622 | 18424185. 69 |
| M392T669   | 392. 2305585 | 669. 12  | 27621433. 89 |
| M392T683   | 392. 2304956 | 682. 948 | 27432955. 5  |
| M392T626_1 | 392. 2296216 | 626. 183 | 183543941. 4 |

|            |              |          |              |
|------------|--------------|----------|--------------|
| M392T487   | 392. 230419  | 487. 329 | 271049. 5222 |
| M392T732   | 392. 2304208 | 731. 793 | 4606805. 93  |
| M392T834   | 392. 254428  | 833. 866 | 174779. 3135 |
| M392T626_2 | 392. 4789987 | 626. 183 | 280957. 0102 |
| M393T89    | 392. 9814558 | 88. 8247 | 5577193. 653 |
| M393T33    | 392. 9944311 | 32. 8715 | 234259. 9099 |
| M393T71    | 393. 0329245 | 70. 607  | 7885705. 68  |
| M393T79    | 393. 0406021 | 79. 4105 | 6566572. 64  |
| M393T458   | 393. 0745397 | 457. 763 | 327276. 447  |
| M393T393   | 393. 0797866 | 392. 905 | 905186. 3328 |
| M393T407   | 393. 0798648 | 406. 813 | 1096456. 385 |
| M393T261   | 393. 1026424 | 261. 138 | 57414. 13958 |
| M393T384   | 393. 1108255 | 383. 727 | 3172514. 803 |
| M393T203   | 393. 1164346 | 203. 346 | 911136. 9282 |
| M393T347   | 393. 1141711 | 347. 166 | 914779. 5333 |
| M393T528   | 393. 1181284 | 527. 688 | 1229018. 395 |
| M393T296   | 393. 1158695 | 295. 704 | 2142583. 582 |
| M393T324   | 393. 1142315 | 324. 413 | 10431197. 1  |
| M393T340   | 393. 1374764 | 339. 772 | 421148. 5833 |
| M393T362   | 393. 1612944 | 362. 384 | 411218. 6327 |
| M393T456_1 | 393. 1678332 | 456. 2   | 12131407. 42 |
| M393T349_1 | 393. 1671603 | 348. 668 | 2235620. 986 |
| M393T495_1 | 393. 1733064 | 495. 125 | 1948908. 458 |
| M393T365   | 393. 1732618 | 365. 475 | 5247409. 057 |
| M393T401_1 | 393. 1733515 | 400. 641 | 16168870. 61 |
| M393T376_1 | 393. 1733284 | 376. 15  | 10474334. 93 |
| M393T338   | 393. 1796573 | 338. 222 | 3041605. 058 |
| M393T419   | 393. 173337  | 419. 237 | 13115758. 12 |
| M393T486   | 393. 173473  | 485. 784 | 1475012. 796 |
| M393T387   | 393. 1733591 | 386. 78  | 10222684. 13 |
| M393T456_2 | 393. 179849  | 456. 2   | 20383678. 52 |
| M393T349_2 | 393. 1797721 | 348. 668 | 4765435. 096 |
| M393T583   | 393. 1816795 | 582. 96  | 1365113. 747 |
| M393T571_1 | 393. 1863037 | 570. 599 | 2916364. 874 |
| M393T495_2 | 393. 1835699 | 495. 125 | 1183747. 977 |
| M393T535   | 393. 1936765 | 535. 488 | 3490330. 018 |
| M393T680   | 393. 1901199 | 679. 873 | 4490604. 478 |
| M393T523   | 393. 1937452 | 523. 055 | 3780922. 359 |
| M393T688   | 393. 1900452 | 688. 189 | 6219569. 261 |
| M393T422   | 393. 1843401 | 422. 362 | 8661484. 836 |
| M393T401_2 | 393. 1844128 | 400. 641 | 10513925. 25 |
| M393T376_2 | 393. 1843836 | 376. 15  | 6578124. 411 |
| M393T352   | 393. 1917387 | 351. 663 | 1119280. 478 |
| M393T580   | 393. 195445  | 579. 883 | 11874964. 12 |
| M393T563   | 393. 1958624 | 562. 946 | 6036201. 94  |
| M393T594   | 393. 1955983 | 593. 841 | 8054363. 603 |
| M393T571_2 | 393. 1983409 | 570. 599 | 5316013. 266 |
| M393T703   | 393. 2308053 | 702. 622 | 3914097. 057 |
| M393T669   | 393. 2308221 | 669. 12  | 6077059. 528 |
| M393T683   | 393. 2308771 | 682. 948 | 6375305. 826 |
| M393T626   | 393. 2326712 | 626. 183 | 33530798. 28 |
| M394T288   | 394. 0971345 | 287. 981 | 3136132. 717 |
| M394T277   | 394. 0972016 | 276. 825 | 1761012. 836 |
| M394T385   | 394. 1028025 | 385. 225 | 557417. 036  |

|            |              |          |              |
|------------|--------------|----------|--------------|
| M394T442   | 394. 1094723 | 442. 399 | 1377468. 678 |
| M394T473_1 | 394. 1110212 | 473. 329 | 3197828. 495 |
| M394T344   | 394. 1132504 | 344. 233 | 1643243. 694 |
| M394T419   | 394. 111765  | 419. 237 | 2919288. 57  |
| M394T200   | 394. 1109194 | 200. 362 | 588484. 4957 |
| M394T324_1 | 394. 1168431 | 324. 413 | 2006531. 261 |
| M394T106   | 394. 1323187 | 105. 537 | 3799892. 573 |
| M394T199_1 | 394. 1247586 | 198. 821 | 740192. 521  |
| M394T293_1 | 394. 1335161 | 292. 621 | 905745. 0544 |
| M394T303   | 394. 1355837 | 303. 259 | 342676. 832  |
| M394T643   | 394. 149013  | 643. 166 | 3414258. 059 |
| M394T572   | 394. 1490908 | 572. 152 | 1803506. 046 |
| M394T293_2 | 394. 158573  | 292. 621 | 449600. 7581 |
| M394T187   | 394. 169575  | 186. 689 | 3144044. 588 |
| M394T337   | 394. 1694357 | 336. 681 | 1718877. 21  |
| M394T473_2 | 394. 1704485 | 473. 329 | 15817078. 37 |
| M394T314   | 394. 1695969 | 313. 612 | 16872027. 54 |
| M394T324_2 | 394. 169515  | 324. 413 | 27216197. 82 |
| M394T209   | 394. 172289  | 209. 472 | 1064545. 928 |
| M394T559   | 394. 1709562 | 558. 574 | 5831484. 577 |
| M394T458   | 394. 1770817 | 457. 763 | 3366777. 705 |
| M394T172   | 394. 1722252 | 171. 546 | 685106. 2252 |
| M394T508   | 394. 1707776 | 507. 55  | 3338873. 311 |
| M394T489   | 394. 1710036 | 488. 885 | 4817440. 749 |
| M394T199_2 | 394. 1723491 | 198. 821 | 1521351. 613 |
| M394T365   | 394. 1803674 | 365. 475 | 944682. 0377 |
| M394T401   | 394. 1804377 | 400. 641 | 2446504. 038 |
| M394T376   | 394. 1802694 | 376. 15  | 1768433. 932 |
| M394T387   | 394. 1806631 | 386. 78  | 3275613. 562 |
| M394T580   | 394. 1974054 | 579. 883 | 5208934. 653 |
| M394T626   | 394. 2326655 | 626. 183 | 5272153. 353 |
| M394T778   | 394. 2633399 | 777. 92  | 6488110. 242 |
| M394T801   | 394. 263088  | 800. 683 | 14622048. 32 |
| M394T820   | 394. 2632161 | 820. 294 | 10893602. 53 |
| M394T764   | 394. 263279  | 764. 034 | 3775344. 639 |
| M394T835   | 394. 2632269 | 835. 329 | 13844702. 82 |
| M394T753   | 394. 2633334 | 753. 315 | 1946074. 729 |
| M395T574_1 | 395. 0317434 | 573. 704 | 1094778. 077 |
| M395T69    | 395. 0430196 | 69. 1983 | 177446. 3219 |
| M395T428   | 395. 0487707 | 428. 448 | 508475. 7515 |
| M395T724   | 395. 0597993 | 724. 158 | 1747217. 173 |
| M395T766   | 395. 0599249 | 765. 588 | 2092208. 041 |
| M395T779   | 395. 0598911 | 779. 407 | 2445106. 761 |
| M395T796   | 395. 0597694 | 796. 202 | 3140579. 547 |
| M395T753   | 395. 0600137 | 753. 315 | 1551205. 309 |
| M395T277   | 395. 100788  | 276. 825 | 134911. 0148 |
| M395T473_1 | 395. 1172304 | 473. 329 | 383469. 84   |
| M395T324_1 | 395. 1175229 | 324. 413 | 504210. 3196 |
| M395T617   | 395. 1250622 | 616. 891 | 2853564. 275 |
| M395T329   | 395. 145491  | 328. 999 | 1208994. 873 |
| M395T364   | 395. 1482325 | 363. 928 | 394823. 4912 |
| M395T145   | 395. 1551121 | 144. 706 | 495108. 5619 |
| M395T343   | 395. 1566644 | 342. 819 | 22265568. 09 |
| M395T531   | 395. 1659793 | 530. 804 | 3391997. 373 |

|            |              |          |              |
|------------|--------------|----------|--------------|
| M395T355   | 395. 1717812 | 354. 719 | 4245553. 433 |
| M395T324_2 | 395. 1734856 | 324. 413 | 4626447. 894 |
| M395T473_2 | 395. 1827194 | 473. 329 | 1059702. 524 |
| M395T390   | 395. 19034   | 389. 839 | 1410024. 835 |
| M395T456   | 395. 1848994 | 456. 2   | 1585417. 878 |
| M395T522   | 395. 1901887 | 521. 5   | 3298489. 059 |
| M395T398   | 395. 1903158 | 397. 585 | 2686033. 922 |
| M395T376   | 395. 1903661 | 376. 15  | 4239805. 428 |
| M395T419   | 395. 1902218 | 419. 237 | 20443553. 41 |
| M395T433   | 395. 1920037 | 433. 06  | 4423386. 979 |
| M395T535   | 395. 1939599 | 535. 488 | 681070. 404  |
| M395T441   | 395. 1919641 | 440. 833 | 5990191. 276 |
| M395T807   | 395. 2051137 | 806. 698 | 1262795. 473 |
| M395T574_2 | 395. 2071094 | 573. 704 | 559976. 6188 |
| M395T594   | 395. 2275023 | 593. 841 | 728724. 3486 |
| M395T584   | 395. 2273838 | 584. 484 | 748273. 8619 |
| M395T819   | 395. 2622805 | 818. 743 | 2679828. 842 |
| M395T801   | 395. 2649095 | 800. 683 | 2065905. 433 |
| M395T835   | 395. 264988  | 835. 329 | 2993555. 875 |
| M396T277   | 396. 076617  | 276. 825 | 142593. 9163 |
| M396T537   | 396. 1049075 | 537. 051 | 110417. 3309 |
| M396T331_1 | 396. 1138359 | 330. 552 | 838624. 6176 |
| M396T83    | 396. 1140451 | 82. 8986 | 1103691. 861 |
| M396T427   | 396. 1270946 | 426. 913 | 1218066. 815 |
| M396T331_2 | 396. 1287903 | 330. 552 | 1280634. 115 |
| M396T410   | 396. 1324077 | 409. 881 | 2316095. 224 |
| M396T466   | 396. 1287971 | 465. 575 | 989931. 894  |
| M396T617   | 396. 1318899 | 616. 891 | 368789. 7002 |
| M396T353   | 396. 14158   | 353. 163 | 644831. 4461 |
| M396T107   | 396. 1510857 | 106. 648 | 875816. 944  |
| M396T447   | 396. 1523957 | 446. 967 | 676929. 7374 |
| M396T343   | 396. 1563965 | 342. 819 | 3979144. 649 |
| M396T529   | 396. 1832054 | 529. 248 | 1588507. 721 |
| M396T340   | 396. 1869281 | 339. 772 | 169014. 3272 |
| M396T787   | 396. 1979762 | 787. 078 | 1560653. 88  |
| M396T441   | 396. 1968981 | 440. 833 | 930534. 6311 |
| M396T419   | 396. 1969973 | 419. 237 | 3683037. 641 |
| M396T811   | 396. 2223562 | 811. 292 | 33514337. 86 |
| M397T779   | 397. 0558791 | 779. 407 | 1599155. 284 |
| M397T191   | 397. 0980876 | 191. 259 | 978180. 8333 |
| M397T372   | 397. 1233557 | 371. 633 | 262893. 5996 |
| M397T175   | 397. 1327524 | 174. 576 | 1221950. 442 |
| M397T187   | 397. 1353546 | 186. 689 | 4129523. 624 |
| M397T586   | 397. 1383264 | 586. 044 | 2381748. 722 |
| M397T362   | 397. 1619444 | 362. 384 | 547311. 8657 |
| M397T419   | 397. 1966739 | 419. 237 | 571272. 5287 |
| M397T455   | 397. 2060466 | 454. 645 | 1472433. 375 |
| M397T446   | 397. 206005  | 445. 522 | 4567274. 233 |
| M397T628   | 397. 2227764 | 627. 731 | 4180251. 555 |
| M397T816   | 397. 2232243 | 815. 664 | 8061861. 208 |
| M398T500   | 398. 0689984 | 499. 759 | 585580. 58   |
| M398T215   | 398. 0915201 | 215. 4   | 1093901. 816 |
| M398T109   | 398. 0932737 | 109. 475 | 4888506. 637 |
| M398T149   | 398. 0934744 | 148. 981 | 4728458. 628 |

|            |              |          |              |
|------------|--------------|----------|--------------|
| M398T438   | 398. 1197434 | 437. 734 | 143878. 6105 |
| M398T269   | 398. 1291983 | 269. 337 | 333208. 155  |
| M398T349   | 398. 1445155 | 348. 668 | 1123982. 25  |
| M398T359   | 398. 1458405 | 359. 297 | 1545593. 648 |
| M398T314   | 398. 1533763 | 313. 612 | 638526. 591  |
| M398T422   | 398. 1610313 | 422. 362 | 418924. 1829 |
| M398T810   | 398. 2203153 | 809. 797 | 1675654. 492 |
| M399T478   | 399. 0934688 | 477. 982 | 173389. 3548 |
| M399T432   | 399. 0953327 | 431. 507 | 251760. 0331 |
| M399T106   | 399. 1123425 | 105. 537 | 6019375. 815 |
| M399T199   | 399. 1123408 | 198. 821 | 1301384. 429 |
| M399T514   | 399. 1178097 | 513. 768 | 453115. 9482 |
| M399T427   | 399. 1337899 | 426. 913 | 694860. 7393 |
| M399T586   | 399. 1369001 | 586. 044 | 616803. 856  |
| M399T355   | 399. 148288  | 354. 719 | 2924538. 932 |
| M399T367   | 399. 148289  | 367. 026 | 251934. 7927 |
| M399T805   | 399. 1447983 | 805. 145 | 560842. 9341 |
| M399T537   | 399. 1520353 | 537. 051 | 2414904. 558 |
| M399T497   | 399. 1656403 | 496. 646 | 797623. 9055 |
| M399T361   | 399. 1861113 | 360. 831 | 583641. 5001 |
| M399T778   | 399. 3469901 | 777. 92  | 2003627. 124 |
| M399T835   | 399. 3470669 | 835. 329 | 2793949. 227 |
| M400T187   | 400. 0718441 | 186. 689 | 630142. 1625 |
| M400T372   | 400. 084797  | 371. 633 | 1501630. 191 |
| M400T490   | 400. 0859777 | 490. 434 | 1069373. 075 |
| M400T315   | 400. 1087123 | 315. 162 | 815697. 3812 |
| M400T184   | 400. 1086006 | 183. 708 | 2253067. 336 |
| M400T246   | 400. 1119286 | 246. 013 | 982926. 2736 |
| M400T324   | 400. 1233642 | 324. 413 | 1315695. 642 |
| M400T539   | 400. 1580517 | 538. 619 | 410765. 0739 |
| M400T442   | 400. 1597191 | 442. 399 | 879639. 1832 |
| M400T458   | 400. 1597768 | 457. 763 | 2637764. 964 |
| M400T428   | 400. 1807328 | 428. 448 | 650112. 856  |
| M400T756   | 400. 2425303 | 756. 343 | 1375871. 195 |
| M401T442   | 401. 0229715 | 442. 399 | 3665233. 552 |
| M401T715   | 401. 0860904 | 714. 841 | 449753. 7411 |
| M401T552   | 401. 0859088 | 552. 493 | 11386550. 88 |
| M401T456_1 | 401. 1069604 | 456. 2   | 14583913. 48 |
| M401T305   | 401. 1051867 | 304. 743 | 4576364. 31  |
| M401T381   | 401. 1078658 | 380. 608 | 1066776. 686 |
| M401T340   | 401. 1051849 | 339. 772 | 514893. 4883 |
| M401T456_2 | 401. 1182726 | 456. 2   | 1188920. 105 |
| M401T486   | 401. 1199396 | 485. 784 | 2149917. 188 |
| M401T358   | 401. 1202125 | 357. 746 | 709009. 8401 |
| M401T107   | 401. 1267788 | 106. 648 | 2647925. 519 |
| M401T157   | 401. 1281443 | 156. 582 | 2178373. 52  |
| M401T778   | 401. 1280712 | 777. 92  | 3076817. 051 |
| M401T804   | 401. 1279303 | 803. 615 | 8691238. 532 |
| M401T834   | 401. 1330997 | 833. 866 | 6695027. 872 |
| M401T764   | 401. 1316152 | 764. 034 | 1144525. 627 |
| M401T753   | 401. 1316498 | 753. 315 | 726457. 2671 |
| M401T511   | 401. 1434641 | 510. 673 | 1194286. 484 |
| M401T539   | 401. 1525631 | 538. 619 | 579631. 301  |
| M401T756   | 401. 1598739 | 756. 343 | 3250124. 429 |

|            |              |          |              |
|------------|--------------|----------|--------------|
| M401T352   | 401. 1543839 | 351. 663 | 1329869. 86  |
| M401T700   | 401. 1584667 | 699. 592 | 656521. 2436 |
| M401T318   | 401. 1659144 | 318. 232 | 272463. 8274 |
| M401T398   | 401. 1789722 | 397. 585 | 965429. 1995 |
| M401T504   | 401. 1811184 | 504. 432 | 1465481. 739 |
| M401T441   | 401. 179108  | 440. 833 | 1989741. 33  |
| M401T706   | 401. 251824  | 705. 593 | 1862448. 907 |
| M401T691   | 401. 2516596 | 691. 303 | 3299861. 517 |
| M402T147_1 | 402. 0804284 | 147. 455 | 7668886. 925 |
| M402T291   | 402. 0876648 | 291. 076 | 504663. 8978 |
| M402T172   | 402. 087776  | 171. 546 | 3062039. 233 |
| M402T109   | 402. 0875102 | 109. 475 | 7245896. 624 |
| M402T200   | 402. 0877791 | 200. 362 | 3707964. 489 |
| M402T147_2 | 402. 0921993 | 147. 455 | 9383873. 132 |
| M402T552   | 402. 0947917 | 552. 493 | 1685392. 655 |
| M402T294_1 | 402. 1029467 | 294. 152 | 1067162. 491 |
| M402T458   | 402. 1152828 | 457. 763 | 2154940. 608 |
| M402T294_2 | 402. 1239701 | 294. 152 | 635453. 9854 |
| M402T393   | 402. 1393342 | 392. 905 | 1358729. 903 |
| M402T632   | 402. 209985  | 632. 288 | 2462161. 49  |
| M403T337   | 403. 0854053 | 336. 681 | 3980166. 894 |
| M403T370   | 403. 1018946 | 370. 115 | 699110. 5323 |
| M403T456   | 403. 1130111 | 456. 2   | 529202. 4015 |
| M403T472   | 403. 1223593 | 471. 768 | 3528517. 985 |
| M403T283   | 403. 1222698 | 282. 659 | 1524958. 868 |
| M403T388   | 403. 1221948 | 388. 326 | 798464. 8535 |
| M403T372   | 403. 1220625 | 371. 633 | 1858980. 912 |
| M403T111   | 403. 1237852 | 110. 926 | 512947. 561  |
| M403T520   | 403. 1311218 | 519. 998 | 2488289. 9   |
| M403T413   | 403. 1356319 | 413. 006 | 846952. 1426 |
| M403T402   | 403. 1354224 | 402. 144 | 906450. 7361 |
| M403T439   | 403. 135325  | 439. 27  | 711451. 6871 |
| M403T594   | 403. 1413807 | 593. 841 | 4328550. 074 |
| M403T350   | 403. 1565628 | 350. 108 | 2114502. 85  |
| M403T407   | 403. 1603823 | 406. 813 | 1321960. 258 |
| M403T314   | 403. 1683238 | 313. 612 | 2251285. 164 |
| M403T375   | 403. 1719313 | 374. 746 | 371540. 6156 |
| M403T649   | 403. 1723283 | 649. 195 | 2258789. 905 |
| M403T686   | 403. 1778136 | 686. 047 | 3952763. 159 |
| M403T720   | 403. 1776357 | 719. 505 | 1515104. 74  |
| M403T738   | 403. 1740454 | 737. 955 | 1489709. 154 |
| M403T672   | 403. 1720992 | 672. 229 | 4178451. 104 |
| M403T411   | 403. 1795964 | 411. 444 | 6933836. 044 |
| M403T663   | 403. 1787767 | 663. 008 | 8698911. 82  |
| M403T334   | 403. 1944897 | 333. 655 | 595642. 6717 |
| M403T546   | 403. 2069728 | 546. 308 | 292524. 0112 |
| M404T359   | 404. 023756  | 359. 297 | 886991. 2131 |
| M404T68    | 404. 0447419 | 67. 6441 | 170741. 2237 |
| M404T782   | 404. 0603796 | 782. 5   | 477808. 8186 |
| M404T238   | 404. 0815294 | 238. 024 | 1147007. 791 |
| M404T807   | 404. 0988513 | 806. 698 | 30022028. 54 |
| M404T140_1 | 404. 1007082 | 140. 209 | 54456025. 41 |
| M404T102   | 404. 1006824 | 101. 563 | 652082956. 8 |
| M404T288   | 404. 1007075 | 287. 981 | 33073098. 41 |

|            |              |          |              |
|------------|--------------|----------|--------------|
| M404T128_1 | 404. 1006986 | 128. 279 | 235051336. 4 |
| M404T111_1 | 404. 1006813 | 110. 926 | 279509121. 1 |
| M404T200_1 | 404. 1008324 | 200. 362 | 9883126. 894 |
| M404T152_1 | 404. 1007929 | 152. 08  | 19044678. 26 |
| M404T835   | 404. 1027475 | 835. 329 | 22208865. 21 |
| M404T182   | 404. 1084699 | 182. 156 | 16061359. 08 |
| M404T221   | 404. 1110719 | 221. 453 | 3547076. 458 |
| M404T291   | 404. 1121664 | 291. 076 | 19888658. 31 |
| M404T140_2 | 404. 1112971 | 140. 209 | 21394042. 5  |
| M404T128_2 | 404. 1122534 | 128. 279 | 92660593. 37 |
| M404T111_2 | 404. 1122433 | 110. 926 | 112360939. 5 |
| M404T152_2 | 404. 1113491 | 152. 08  | 6926340. 316 |
| M404T450   | 404. 1158301 | 450. 052 | 1747052. 774 |
| M404T473   | 404. 1280226 | 473. 329 | 336620. 6727 |
| M404T724   | 404. 1315027 | 724. 158 | 4525308. 113 |
| M404T712   | 404. 1315329 | 711. 794 | 13863275. 76 |
| M404T327   | 404. 1544305 | 327. 449 | 1803144. 421 |
| M404T217   | 404. 154663  | 216. 95  | 1224691. 807 |
| M404T340   | 404. 1546115 | 339. 772 | 1370242. 612 |
| M404T200_2 | 404. 1546027 | 200. 362 | 1267233. 511 |
| M404T638   | 404. 1547715 | 638. 484 | 341730. 2938 |
| M404T480   | 404. 1642466 | 479. 541 | 468933. 7066 |
| M404T458   | 404. 1738235 | 457. 763 | 3241069. 369 |
| M404T424   | 404. 1792587 | 423. 877 | 851899. 4529 |
| M404T552   | 404. 1907036 | 552. 493 | 1842289. 763 |
| M404T65    | 404. 4553171 | 65. 4825 | 2164197. 056 |
| M405T73    | 405. 0118584 | 73. 3444 | 14231817. 75 |
| M405T176   | 405. 0789238 | 176. 104 | 1645741. 51  |
| M405T160   | 405. 0786892 | 159. 635 | 1513573. 953 |
| M405T703   | 405. 0885725 | 702. 622 | 830253. 1661 |
| M405T792   | 405. 0882982 | 791. 678 | 17694047. 97 |
| M405T268   | 405. 1058555 | 268. 419 | 838358. 3963 |
| M405T274   | 405. 1058467 | 273. 82  | 1003278. 422 |
| M405T140   | 405. 110032  | 140. 209 | 6346050. 163 |
| M405T242   | 405. 1061003 | 242. 223 | 965156. 6403 |
| M405T102   | 405. 1060964 | 101. 563 | 96485097. 63 |
| M405T293   | 405. 1121685 | 292. 621 | 2932366. 547 |
| M405T128   | 405. 1062202 | 128. 279 | 26603593. 28 |
| M405T111   | 405. 1061435 | 110. 926 | 46707222. 35 |
| M405T152   | 405. 1093054 | 152. 08  | 2251953. 055 |
| M405T804   | 405. 1080984 | 803. 615 | 2218010. 642 |
| M405T835   | 405. 1081254 | 835. 329 | 2090529. 726 |
| M405T411   | 405. 1135931 | 411. 444 | 965231. 1485 |
| M405T396_1 | 405. 1138142 | 396. 023 | 1698650. 246 |
| M405T382   | 405. 1138498 | 382. 171 | 1106514. 023 |
| M405T200   | 405. 1162234 | 200. 362 | 8167914. 635 |
| M405T724   | 405. 1350306 | 724. 158 | 962362. 7748 |
| M405T712   | 405. 1353631 | 711. 794 | 3192162. 439 |
| M405T355   | 405. 1389629 | 354. 719 | 7073062. 975 |
| M405T396_2 | 405. 1371201 | 396. 023 | 3324991. 267 |
| M405T257   | 405. 1389722 | 257. 001 | 108561. 4589 |
| M405T340   | 405. 1438501 | 339. 772 | 1526727. 735 |
| M405T535   | 405. 1518617 | 535. 488 | 3987353. 198 |
| M405T556   | 405. 1526035 | 555. 524 | 6662521. 272 |



|          |              |          |              |
|----------|--------------|----------|--------------|
| M405T546 | 405. 1520963 | 546. 308 | 3255774. 95  |
| M405T356 | 405. 1590633 | 356. 274 | 978424. 673  |
| M405T557 | 405. 1666883 | 557. 078 | 364933. 6928 |
| M405T399 | 405. 178729  | 399. 086 | 604681. 8486 |
| M405T379 | 405. 1736357 | 379. 066 | 1165481. 414 |
| M405T459 | 405. 1736561 | 459. 324 | 1313542. 344 |
| M405T428 | 405. 1744101 | 428. 448 | 1222431. 764 |
| M405T182 | 405. 1870502 | 182. 156 | 330939. 4695 |
| M405T643 | 405. 1913143 | 643. 166 | 973491. 6655 |
| M405T628 | 405. 191313  | 627. 731 | 22742775. 44 |
| M405T464 | 405. 2221435 | 464. 011 | 3269682. 368 |
| M405T456 | 405. 2337561 | 456. 2   | 3368029. 243 |
| M405T65  | 405. 4565717 | 65. 4825 | 159469. 9984 |
| M406T359 | 405. 9811374 | 359. 297 | 733543. 8233 |
| M406T787 | 406. 0907218 | 787. 078 | 4236729. 015 |
| M406T83  | 406. 0977515 | 82. 8986 | 2210801. 062 |
| M406T364 | 406. 0977656 | 363. 928 | 482894. 4714 |
| M406T102 | 406. 1072436 | 101. 563 | 21695575. 02 |
| M406T373 | 406. 1104237 | 373. 196 | 664861. 009  |
| M406T317 | 406. 1030313 | 316. 709 | 431346. 6641 |
| M406T130 | 406. 1048467 | 129. 827 | 13383733. 96 |
| M406T202 | 406. 1165368 | 201. 897 | 1342022. 244 |
| M406T528 | 406. 1113838 | 527. 688 | 491158. 8085 |
| M406T452 | 406. 1235111 | 451. 616 | 155920. 6837 |
| M406T107 | 406. 1328025 | 106. 648 | 1587034. 318 |
| M406T163 | 406. 1346443 | 162. 615 | 2012924. 419 |
| M406T146 | 406. 1346388 | 146. 08  | 1190660. 333 |
| M406T355 | 406. 1449131 | 354. 719 | 1102385. 802 |
| M406T324 | 406. 1443558 | 324. 413 | 201892. 1656 |
| M406T732 | 406. 1482919 | 731. 793 | 3826241. 145 |
| M406T556 | 406. 1579657 | 555. 524 | 1314302. 819 |
| M406T318 | 406. 1816119 | 318. 232 | 1051297. 004 |
| M406T628 | 406. 1988623 | 627. 731 | 6433271. 282 |
| M406T494 | 406. 2065367 | 493. 56  | 3030307. 701 |
| M406T704 | 406. 2105753 | 704. 046 | 2237740. 267 |
| M406T775 | 406. 2334065 | 774. 892 | 406455. 5959 |
| M406T456 | 406. 2406606 | 456. 2   | 454572. 3976 |
| M407T68  | 406. 9519214 | 67. 6441 | 443668. 9778 |
| M407T33  | 406. 9744945 | 32. 8715 | 48419. 744   |
| M407T73  | 407. 0094711 | 73. 3444 | 14693545. 79 |
| M407T375 | 407. 0950368 | 374. 746 | 353905. 2392 |
| M407T710 | 407. 1257903 | 710. 246 | 1283604. 805 |
| M407T329 | 407. 1417936 | 328. 999 | 4230977. 722 |
| M407T732 | 407. 1496961 | 731. 793 | 702748. 5533 |
| M407T311 | 407. 1533535 | 310. 626 | 1724385. 609 |
| M407T346 | 407. 1534536 | 345. 761 | 3540443. 843 |
| M407T364 | 407. 1575224 | 363. 928 | 921045. 194  |
| M407T394 | 407. 1572899 | 394. 467 | 2620614. 923 |
| M407T324 | 407. 1534995 | 324. 413 | 2404211. 213 |
| M407T428 | 407. 1570701 | 428. 448 | 1021514. 947 |
| M407T172 | 407. 165166  | 171. 546 | 1459379. 202 |
| M407T508 | 407. 1669786 | 507. 55  | 1758587. 962 |
| M407T531 | 407. 1692821 | 530. 804 | 4484315. 44  |
| M407T584 | 407. 1700341 | 584. 484 | 8879873. 287 |

|            |              |          |              |
|------------|--------------|----------|--------------|
| M407T430   | 407. 1831904 | 429. 94  | 110351. 0488 |
| M407T517   | 407. 1907768 | 516. 908 | 1428162. 059 |
| M407T532   | 407. 190589  | 532. 372 | 570112. 6724 |
| M407T792   | 407. 2197714 | 791. 678 | 424820. 3135 |
| M408T773   | 407. 9670378 | 773. 333 | 9778443. 097 |
| M408T75    | 407. 9905254 | 74. 6705 | 11841810. 9  |
| M408T72    | 408. 011154  | 72. 0941 | 1823739. 816 |
| M408T427   | 408. 1037528 | 426. 913 | 1298344. 056 |
| M408T416   | 408. 1030537 | 416. 128 | 1236585. 522 |
| M408T337   | 408. 1136896 | 336. 681 | 2503676. 334 |
| M408T297   | 408. 1136519 | 297. 149 | 1255117. 089 |
| M408T364   | 408. 1197432 | 363. 928 | 1020945. 146 |
| M408T211   | 408. 1153312 | 210. 883 | 424892. 6363 |
| M408T439   | 408. 1176013 | 439. 27  | 1911595. 375 |
| M408T464   | 408. 127289  | 464. 011 | 330163. 2338 |
| M408T373   | 408. 1408433 | 373. 196 | 365921. 1849 |
| M408T361   | 408. 1404348 | 360. 831 | 652668. 7733 |
| M408T106   | 408. 1488432 | 105. 537 | 2785174. 087 |
| M408T455   | 408. 1507886 | 454. 645 | 1404819. 181 |
| M408T433   | 408. 1508989 | 433. 06  | 6847588. 41  |
| M408T483   | 408. 1509263 | 482. 656 | 1318855. 161 |
| M408T404   | 408. 1508    | 403. 698 | 1588045. 31  |
| M408T294   | 408. 1505364 | 294. 152 | 305190. 1017 |
| M408T700   | 408. 1645447 | 699. 592 | 2790223. 312 |
| M408T394   | 408. 1621396 | 394. 467 | 225467. 4514 |
| M408T172   | 408. 1722519 | 171. 546 | 512983. 7087 |
| M408T376   | 408. 1801824 | 376. 15  | 1522791. 249 |
| M408T615   | 408. 2210098 | 615. 38  | 2962011. 184 |
| M408T635   | 408. 2212748 | 635. 37  | 5014219. 098 |
| M408T568   | 408. 2217073 | 567. 543 | 1382713. 783 |
| M408T597   | 408. 2214132 | 596. 795 | 2202360. 107 |
| M408T548   | 408. 2206061 | 547. 805 | 5411749. 425 |
| M409T102   | 409. 0810238 | 101. 563 | 30240312. 96 |
| M409T93    | 409. 0808449 | 92. 9618 | 35381542. 74 |
| M409T419   | 409. 1102941 | 419. 237 | 703874. 4748 |
| M409T439   | 409. 1214899 | 439. 27  | 282728. 136  |
| M409T387   | 409. 1476601 | 386. 78  | 698258. 5741 |
| M409T399   | 409. 1496572 | 399. 086 | 924537. 5037 |
| M409T435   | 409. 1558963 | 434. 617 | 1091037. 042 |
| M409T411_1 | 409. 1638695 | 411. 444 | 4416473. 042 |
| M409T335   | 409. 1692545 | 335. 153 | 1769199. 464 |
| M409T391   | 409. 1695928 | 391. 341 | 1551702. 583 |
| M409T318   | 409. 1693843 | 318. 232 | 1107396. 502 |
| M409T364   | 409. 1640038 | 363. 928 | 3514363. 83  |
| M409T700   | 409. 1674386 | 699. 592 | 472004. 2616 |
| M409T601_1 | 409. 1710476 | 601. 473 | 2170104. 286 |
| M409T446   | 409. 1742741 | 445. 522 | 697480. 7188 |
| M409T537_1 | 409. 1831821 | 537. 051 | 83649109. 46 |
| M409T411_2 | 409. 1777718 | 411. 444 | 3957656. 118 |
| M409T556   | 409. 1783223 | 555. 524 | 12033688. 22 |
| M409T601_2 | 409. 1827297 | 601. 473 | 1107267. 067 |
| M409T568   | 409. 1890622 | 567. 543 | 3096874. 937 |
| M409T584   | 409. 188536  | 584. 484 | 1884159. 135 |
| M409T537_2 | 409. 1959258 | 537. 051 | 2861316. 096 |

|            |              |          |              |
|------------|--------------|----------|--------------|
| M409T525   | 409. 1958877 | 524. 56  | 348472. 6222 |
| M409T615   | 409. 2243901 | 615. 38  | 339547. 846  |
| M409T548   | 409. 2237957 | 547. 805 | 836067. 3472 |
| M409T31    | 409. 2342566 | 31. 4228 | 174489. 7034 |
| M409T820   | 409. 2340591 | 820. 294 | 18652646. 4  |
| M409T834   | 409. 2577803 | 833. 866 | 382744. 2471 |
| M409T537_3 | 409. 4511627 | 537. 051 | 99858. 42848 |
| M410T99    | 410. 083636  | 98. 9649 | 10255035. 96 |
| M410T321   | 410. 0913533 | 321. 312 | 1193508. 147 |
| M410T215   | 410. 0913519 | 215. 4   | 869860. 9677 |
| M410T296   | 410. 0909651 | 295. 704 | 1094428. 356 |
| M410T320   | 410. 1041365 | 319. 785 | 661016. 4807 |
| M410T200   | 410. 1056369 | 200. 362 | 247269. 0783 |
| M410T526   | 410. 1051481 | 526. 124 | 1041267. 611 |
| M410T428   | 410. 1031455 | 428. 448 | 586630. 0869 |
| M410T388   | 410. 1090377 | 388. 326 | 533460. 0082 |
| M410T532   | 410. 1426243 | 532. 372 | 11608048. 38 |
| M410T456   | 410. 1663054 | 456. 2   | 6527822. 348 |
| M410T498   | 410. 1612693 | 498. 202 | 519913. 8649 |
| M410T422   | 410. 1660709 | 422. 362 | 9004771. 512 |
| M410T401   | 410. 1660776 | 400. 641 | 4557899. 205 |
| M410T376   | 410. 166099  | 376. 15  | 2969317. 192 |
| M410T484   | 410. 1614364 | 484. 221 | 541309. 6814 |
| M410T387   | 410. 1658394 | 386. 78  | 2999206. 529 |
| M410T601   | 410. 1760944 | 601. 473 | 710606. 8709 |
| M410T537   | 410. 188994  | 537. 051 | 13308894. 59 |
| M410T805   | 410. 1919084 | 805. 145 | 7125208. 549 |
| M410T311   | 410. 2135089 | 310. 626 | 981621. 6073 |
| M410T259   | 410. 2135111 | 259. 134 | 4328915. 175 |
| M410T820   | 410. 2370367 | 820. 294 | 2667875. 957 |
| M411T802   | 410. 9473259 | 802. 116 | 461719. 1808 |
| M411T545   | 411. 1013789 | 544. 759 | 145333. 7446 |
| M411T432   | 411. 1013852 | 431. 507 | 205050. 606  |
| M411T318   | 411. 105379  | 318. 232 | 301799. 0077 |
| M411T534   | 411. 1178235 | 533. 931 | 1061387. 062 |
| M411T299   | 411. 12515   | 298. 619 | 1455790. 011 |
| M411T379   | 411. 1348869 | 379. 066 | 1484456. 176 |
| M411T674   | 411. 136631  | 673. 771 | 950425. 0023 |
| M411T297   | 411. 1489064 | 297. 149 | 1340391. 593 |
| M411T532   | 411. 1451306 | 532. 372 | 2174956. 803 |
| M411T456   | 411. 1685873 | 456. 2   | 1109377. 024 |
| M411T535   | 411. 1864282 | 535. 488 | 1854253. 011 |
| M411T442   | 411. 1841759 | 442. 399 | 646007. 1676 |
| M411T370   | 411. 1868079 | 370. 115 | 1788300. 885 |
| M411T452   | 411. 1845111 | 451. 616 | 538894. 6152 |
| M411T539   | 411. 2002668 | 538. 619 | 1197435. 349 |
| M411T805   | 411. 1963014 | 805. 145 | 881237. 9433 |
| M411T402   | 411. 2271303 | 402. 144 | 244854. 6234 |
| M412T611   | 412. 0478542 | 610. 742 | 984645. 8079 |
| M412T297   | 412. 1073543 | 297. 149 | 1353993. 63  |
| M412T415   | 412. 1231989 | 414. 571 | 2206527. 512 |
| M412T376   | 412. 1230174 | 376. 15  | 1330632. 167 |
| M412T436   | 412. 1372458 | 436. 18  | 314556. 7374 |
| M412T425   | 412. 1370085 | 425. 439 | 308486. 9501 |

|            |              |          |              |
|------------|--------------|----------|--------------|
| M412T211   | 412. 1370515 | 210. 883 | 962323. 0231 |
| M412T401   | 412. 1450857 | 400. 641 | 1531560. 171 |
| M412T355   | 412. 1588298 | 354. 719 | 2510125. 674 |
| M412T512   | 412. 1588699 | 512. 228 | 517094. 3411 |
| M412T529   | 412. 1556477 | 529. 248 | 933134. 8018 |
| M412T464   | 412. 1741033 | 464. 011 | 480384. 0593 |
| M412T433   | 412. 1787102 | 433. 06  | 2687337. 231 |
| M412T444   | 412. 1784444 | 443. 961 | 2565540. 32  |
| M412T419   | 412. 1787369 | 419. 237 | 7770177. 501 |
| M412T805   | 412. 1883036 | 805. 145 | 1756654. 938 |
| M412T643   | 412. 1962733 | 643. 166 | 318507. 2878 |
| M412T778   | 412. 1983556 | 777. 92  | 358385. 7775 |
| M413T87    | 412. 8551048 | 87. 426  | 2528057. 719 |
| M413T69    | 412. 9993397 | 69. 1983 | 447067. 0681 |
| M413T422   | 413. 106062  | 422. 362 | 871791. 5157 |
| M413T534   | 413. 1065825 | 533. 931 | 1129783. 369 |
| M413T508   | 413. 1128782 | 507. 55  | 324470. 9397 |
| M413T526   | 413. 1206314 | 526. 124 | 472490. 2762 |
| M413T691   | 413. 1183908 | 691. 303 | 2618296. 086 |
| M413T119   | 413. 1267609 | 119. 413 | 3068238. 958 |
| M413T249   | 413. 1287874 | 249. 466 | 635298. 3723 |
| M413T106   | 413. 1260128 | 105. 537 | 9339586. 41  |
| M413T202   | 413. 1288453 | 201. 897 | 1459167. 292 |
| M413T193   | 413. 1289666 | 192. 769 | 1633907. 895 |
| M413T283   | 413. 1287303 | 282. 659 | 1094917. 755 |
| M413T701   | 413. 127638  | 701. 149 | 8323073. 593 |
| M413T532   | 413. 1345318 | 532. 372 | 544804. 2175 |
| M413T365   | 413. 1447293 | 365. 475 | 1187367. 898 |
| M413T446   | 413. 1445349 | 445. 522 | 1484702. 271 |
| M413T373   | 413. 1567461 | 373. 196 | 1833064. 646 |
| M413T399_1 | 413. 1557946 | 399. 086 | 2096158. 983 |
| M413T399_2 | 413. 1667617 | 399. 086 | 4873518. 596 |
| M413T418   | 413. 1705285 | 417. 689 | 1302549. 666 |
| M413T583   | 413. 1786752 | 582. 96  | 1721085. 364 |
| M413T419   | 413. 1827449 | 419. 237 | 1810426. 581 |
| M413T626   | 413. 1925505 | 626. 183 | 728179. 8516 |
| M413T730   | 413. 2383243 | 730. 264 | 6654361. 086 |
| M413T376   | 413. 2382956 | 376. 15  | 687223. 2003 |
| M413T813   | 413. 2510952 | 812. 68  | 1022200. 507 |
| M413T835   | 413. 2677679 | 835. 329 | 643458. 9683 |
| M414T190   | 414. 0880008 | 189. 717 | 1229233. 955 |
| M414T326   | 414. 1307001 | 325. 901 | 14079537. 42 |
| M414T375   | 414. 1375063 | 374. 746 | 1689212. 626 |
| M414T353   | 414. 1375571 | 353. 163 | 869188. 6047 |
| M414T421   | 414. 186271  | 420. 799 | 294482. 2908 |
| M414T446   | 414. 194185  | 445. 522 | 2397991. 84  |
| M414T628   | 414. 2099701 | 627. 731 | 1227791. 588 |
| M414T778   | 414. 2124299 | 777. 92  | 1062475. 017 |
| M414T710   | 414. 2260605 | 710. 246 | 1634549. 908 |
| M414T730   | 414. 2441676 | 730. 264 | 2300289. 524 |
| M415T243   | 415. 0869848 | 243. 386 | 353071. 2408 |
| M415T346   | 415. 0921926 | 345. 761 | 482559. 7374 |
| M415T752   | 415. 1010104 | 751. 766 | 926662. 9862 |
| M415T439   | 415. 0984383 | 439. 27  | 648074. 5312 |

|            |              |          |              |
|------------|--------------|----------|--------------|
| M415T107   | 415. 1071416 | 106. 648 | 6557331. 284 |
| M415T157   | 415. 1063681 | 156. 582 | 11252080. 73 |
| M415T176   | 415. 106256  | 176. 104 | 6695602. 696 |
| M415T483   | 415. 1043885 | 482. 656 | 355205. 7452 |
| M415T118   | 415. 1067684 | 117. 954 | 1720648. 848 |
| M415T125   | 415. 1067094 | 125. 274 | 2680656. 336 |
| M415T95    | 415. 110936  | 95. 2383 | 15310327. 31 |
| M415T433   | 415. 1348419 | 433. 06  | 1098833. 681 |
| M415T418   | 415. 1385919 | 417. 689 | 318643. 6864 |
| M415T293   | 415. 145209  | 292. 621 | 8573718. 714 |
| M415T291   | 415. 1691631 | 291. 076 | 511610. 228  |
| M415T478   | 415. 1631994 | 477. 982 | 685854. 0518 |
| M415T370   | 415. 1733388 | 370. 115 | 3518121. 749 |
| M415T500   | 415. 1712091 | 499. 759 | 185147. 084  |
| M415T753   | 415. 1712354 | 753. 315 | 718955. 8754 |
| M415T738   | 415. 1803475 | 737. 955 | 3882719. 676 |
| M415T340   | 415. 1832082 | 339. 772 | 789112. 7663 |
| M415T559   | 415. 1936101 | 558. 574 | 1785876. 765 |
| M415T446   | 415. 2012452 | 445. 522 | 571839. 0033 |
| M415T393   | 415. 2233384 | 392. 905 | 3394163. 651 |
| M415T594   | 415. 2336205 | 593. 841 | 895789. 1072 |
| M415T712   | 415. 2313866 | 711. 794 | 671764. 0774 |
| M415T837   | 415. 2675906 | 836. 769 | 11723131. 48 |
| M416T369   | 416. 0813003 | 368. 559 | 2394621. 315 |
| M416T338   | 416. 0813318 | 338. 222 | 2903111. 028 |
| M416T111   | 416. 1032779 | 110. 926 | 2992228. 79  |
| M416T199   | 416. 1016279 | 198. 821 | 4659889. 088 |
| M416T158   | 416. 1136666 | 158. 1   | 417257. 8457 |
| M416T172   | 416. 1116215 | 171. 546 | 1506577. 861 |
| M416T293   | 416. 1175126 | 292. 621 | 1131312. 827 |
| M416T185   | 416. 1245929 | 185. 252 | 547448. 8936 |
| M416T497   | 416. 1592335 | 496. 646 | 381593. 2133 |
| M416T326   | 416. 1533676 | 325. 901 | 575570. 3886 |
| M416T320   | 416. 1640076 | 319. 785 | 2759003. 51  |
| M416T370   | 416. 1739156 | 370. 115 | 528347. 3496 |
| M417T197   | 417. 0772031 | 197. 335 | 1489994. 129 |
| M417T367   | 417. 0853572 | 367. 026 | 268295. 1967 |
| M417T441   | 417. 1046339 | 440. 833 | 568107. 0647 |
| M417T511_1 | 417. 1177258 | 510. 673 | 26890981. 53 |
| M417T102   | 417. 1235271 | 101. 563 | 23262874. 2  |
| M417T94    | 417. 1235828 | 94. 1615 | 33691323. 31 |
| M417T394   | 417. 1213927 | 394. 467 | 1312466. 675 |
| M417T511_2 | 417. 1298427 | 510. 673 | 1087560. 381 |
| M417T166   | 417. 1360255 | 165. 522 | 1277934. 248 |
| M417T182   | 417. 1358489 | 182. 156 | 2026923. 895 |
| M417T432_1 | 417. 1399772 | 431. 507 | 8238289. 336 |
| M417T419   | 417. 139929  | 419. 237 | 48356703. 72 |
| M417T405   | 417. 137214  | 405. 254 | 1382403. 402 |
| M417T458   | 417. 1482152 | 457. 763 | 1518771. 241 |
| M417T661   | 417. 1540847 | 661. 453 | 1415268. 393 |
| M417T432_2 | 417. 1743723 | 431. 507 | 1908682. 438 |
| M417T476   | 417. 1848952 | 476. 451 | 205552. 9976 |
| M417T229   | 417. 1987041 | 228. 961 | 1680673. 397 |
| M417T552   | 417. 2102479 | 552. 493 | 3695476. 009 |

|            |              |          |              |
|------------|--------------|----------|--------------|
| M417T663   | 417. 2106504 | 663. 008 | 289066. 2153 |
| M417T483   | 417. 212668  | 482. 656 | 1573445. 355 |
| M418T199   | 418. 0808845 | 198. 821 | 214365. 8352 |
| M418T456   | 418. 0971865 | 456. 2   | 6811317. 952 |
| M418T472   | 418. 0972567 | 471. 768 | 1761889. 276 |
| M418T131   | 418. 1119881 | 131. 207 | 2045572. 655 |
| M418T194   | 418. 1175342 | 194. 243 | 2184190. 55  |
| M418T170   | 418. 1176263 | 170. 049 | 4012723. 893 |
| M418T511   | 418. 1194847 | 510. 673 | 5432204. 335 |
| M418T109   | 418. 1180569 | 109. 475 | 4670634. 949 |
| M418T149   | 418. 1217573 | 148. 981 | 7738333. 41  |
| M418T347   | 418. 1335467 | 347. 166 | 554993. 9277 |
| M418T419   | 418. 1397016 | 419. 237 | 8434701. 802 |
| M418T793   | 418. 2066906 | 793. 233 | 10573923. 91 |
| M418T778   | 418. 2066232 | 777. 92  | 2906232. 179 |
| M418T691   | 418. 2410553 | 691. 303 | 1664285. 98  |
| M418T626   | 418. 2796072 | 626. 183 | 716013. 3836 |
| M419T65_1  | 418. 9334959 | 65. 0166 | 1559394. 998 |
| M419T253   | 419. 0940968 | 252. 703 | 1567804. 608 |
| M419T293   | 419. 0941128 | 292. 621 | 8832220. 215 |
| M419T458   | 419. 1003162 | 457. 763 | 1108833. 482 |
| M419T261   | 419. 0941874 | 261. 138 | 1020676. 84  |
| M419T329   | 419. 116667  | 328. 999 | 893228. 9819 |
| M419T387   | 419. 1268956 | 386. 78  | 662403. 6484 |
| M419T497   | 419. 1358577 | 496. 646 | 311972. 8176 |
| M419T574   | 419. 1361988 | 573. 704 | 839095. 1117 |
| M419T439_1 | 419. 1308365 | 439. 27  | 794924. 848  |
| M419T399   | 419. 1551666 | 399. 086 | 288918. 5864 |
| M419T450   | 419. 1552892 | 450. 052 | 1623382. 631 |
| M419T603   | 419. 1675872 | 603. 04  | 1462512. 765 |
| M419T628   | 419. 1665475 | 627. 731 | 3243667. 901 |
| M419T615   | 419. 1725771 | 615. 38  | 3924636. 358 |
| M419T674   | 419. 1695061 | 673. 771 | 3661333. 542 |
| M419T146   | 419. 1806667 | 146. 08  | 990396. 7542 |
| M419T552   | 419. 1897402 | 552. 493 | 945663. 3162 |
| M419T439_2 | 419. 1885619 | 439. 27  | 1762203. 305 |
| M419T747   | 419. 2038468 | 747. 194 | 1224451. 586 |
| M419T793   | 419. 2104049 | 793. 233 | 2152664. 212 |
| M419T353   | 419. 2141989 | 353. 163 | 5641919. 993 |
| M419T376   | 419. 2141746 | 376. 15  | 8619757. 538 |
| M419T620   | 419. 2224208 | 619. 986 | 1417812. 83  |
| M419T539   | 419. 2303563 | 538. 619 | 444058. 7119 |
| M419T528   | 419. 2305773 | 527. 688 | 2257318. 687 |
| M419T487   | 419. 247191  | 487. 329 | 821135. 9175 |
| M419T834   | 419. 3282539 | 833. 866 | 661313. 3813 |
| M419T65_2  | 419. 4340861 | 65. 0166 | 410134. 1578 |
| M420T408   | 419. 6825813 | 408. 368 | 619926. 9851 |
| M420T65    | 419. 9355859 | 65. 4825 | 69208. 34201 |
| M420T674   | 420. 0909446 | 673. 771 | 941805. 198  |
| M420T492   | 420. 10186   | 491. 99  | 274425. 6381 |
| M420T472   | 420. 1116613 | 471. 768 | 892212. 8127 |
| M420T331   | 420. 1190197 | 330. 552 | 509641. 9952 |
| M420T376_1 | 420. 1602612 | 376. 15  | 543227. 8333 |
| M420T615   | 420. 1726025 | 615. 38  | 815164. 5358 |

|            |              |          |              |
|------------|--------------|----------|--------------|
| M420T405   | 420. 1864414 | 405. 254 | 207249. 964  |
| M420T332   | 420. 1949207 | 332. 105 | 1088158. 128 |
| M420T441   | 420. 1946841 | 440. 833 | 265385. 7849 |
| M420T525   | 420. 1894975 | 524. 56  | 427512. 1249 |
| M420T376_2 | 420. 2194299 | 376. 15  | 1352170. 133 |
| M421T512_1 | 420. 583242  | 512. 228 | 1165677. 065 |
| M421T75_1  | 420. 987444  | 74. 6705 | 34543762. 48 |
| M421T75_2  | 421. 0001581 | 74. 6705 | 13740925. 88 |
| M421T82    | 421. 0725619 | 81. 8855 | 59881072. 14 |
| M421T33    | 421. 0762616 | 32. 8715 | 122409. 5016 |
| M421T835   | 421. 078617  | 835. 329 | 1214437. 97  |
| M421T512_2 | 421. 087339  | 512. 228 | 650283. 2575 |
| M421T494   | 421. 087577  | 493. 56  | 239787. 6553 |
| M421T344   | 421. 1072854 | 344. 233 | 817791. 4475 |
| M421T405   | 421. 1092108 | 405. 254 | 2050954. 224 |
| M421T388   | 421. 1147543 | 388. 326 | 1981027. 084 |
| M421T205   | 421. 1308062 | 204. 895 | 3780510. 16  |
| M421T194   | 421. 1306833 | 194. 243 | 3224441. 668 |
| M421T407   | 421. 1297832 | 406. 813 | 2327555. 568 |
| M421T318   | 421. 1338301 | 318. 232 | 10491755. 68 |
| M421T326   | 421. 146409  | 325. 901 | 803028. 3021 |
| M421T296   | 421. 1463133 | 295. 704 | 2047253. 86  |
| M421T199_1 | 421. 1440906 | 198. 821 | 7687932. 058 |
| M421T517   | 421. 1484901 | 516. 908 | 2677730. 609 |
| M421T489   | 421. 1503046 | 488. 885 | 3974581. 668 |
| M421T532   | 421. 1483053 | 532. 372 | 6874934. 467 |
| M421T462   | 421. 1625017 | 462. 446 | 3243470. 607 |
| M421T452   | 421. 1624569 | 451. 616 | 1243728. 824 |
| M421T415   | 421. 1711093 | 414. 571 | 1139543. 371 |
| M421T428   | 421. 1709966 | 428. 448 | 1042249. 254 |
| M421T574   | 421. 1827773 | 573. 704 | 916233. 3747 |
| M421T199_2 | 421. 1811314 | 198. 821 | 845197. 0415 |
| M421T542   | 421. 2035729 | 541. 673 | 4865729. 811 |
| M421T450   | 421. 2035123 | 450. 052 | 1889927. 335 |
| M422T75    | 421. 99387   | 74. 6705 | 6127358. 305 |
| M422T428   | 422. 0695468 | 428. 448 | 2791728. 962 |
| M422T82    | 422. 0744778 | 81. 8855 | 5897810. 196 |
| M422T766   | 422. 0823418 | 765. 588 | 4865550. 751 |
| M422T388   | 422. 0844123 | 388. 326 | 773721. 8793 |
| M422T778   | 422. 0822611 | 777. 92  | 9327212. 157 |
| M422T796   | 422. 0781832 | 796. 202 | 8392881. 524 |
| M422T753   | 422. 0781553 | 753. 315 | 5518752. 085 |
| M422T217   | 422. 0945536 | 216. 95  | 522245. 5146 |
| M422T789   | 422. 1069442 | 788. 604 | 4361738. 619 |
| M422T492   | 422. 1077222 | 491. 99  | 812523. 7576 |
| M422T315   | 422. 1171732 | 315. 162 | 378932. 1217 |
| M422T396   | 422. 1220252 | 396. 023 | 1056888. 85  |
| M422T355   | 422. 129386  | 354. 719 | 4539476. 281 |
| M422T394   | 422. 1332273 | 394. 467 | 1675754. 896 |
| M422T615_1 | 422. 1439639 | 615. 38  | 26351833. 48 |
| M422T532   | 422. 1489582 | 532. 372 | 839940. 5272 |
| M422T615_2 | 422. 1558753 | 615. 38  | 4060823. 903 |
| M422T212   | 422. 1644799 | 212. 366 | 1388733. 865 |
| M422T164   | 422. 1644311 | 164. 077 | 1235150. 196 |

|            |              |          |              |
|------------|--------------|----------|--------------|
| M422T314   | 422. 1667391 | 313. 612 | 1295647. 25  |
| M422T518   | 422. 1647604 | 518. 474 | 164577. 604  |
| M422T577   | 422. 2036433 | 576. 787 | 504907. 6324 |
| M423T428_1 | 423. 0627141 | 428. 448 | 271198. 6214 |
| M423T729   | 423. 0792875 | 728. 711 | 836157. 4966 |
| M423T755   | 423. 07898   | 754. 814 | 1101472. 634 |
| M423T766   | 423. 0789914 | 765. 588 | 1654786. 891 |
| M423T778   | 423. 0787056 | 777. 92  | 2203560. 919 |
| M423T796   | 423. 0808609 | 796. 202 | 2529884. 416 |
| M423T428_2 | 423. 0753311 | 428. 448 | 537108. 1174 |
| M423T453   | 423. 1036215 | 453. 126 | 880872. 8471 |
| M423T520   | 423. 1039719 | 519. 998 | 640495. 9115 |
| M423T789   | 423. 1103443 | 788. 604 | 901831. 6718 |
| M423T326   | 423. 114258  | 325. 901 | 134568. 3545 |
| M423T615   | 423. 1473806 | 615. 38  | 5566010. 236 |
| M423T411   | 423. 1610651 | 411. 444 | 2356701. 059 |
| M423T480_1 | 423. 165385  | 479. 541 | 894451. 2133 |
| M423T480_2 | 423. 1859139 | 479. 541 | 1706498. 109 |
| M423T469   | 423. 1858202 | 468. 69  | 1410146. 922 |
| M423T427   | 423. 1932824 | 426. 913 | 913447. 6484 |
| M423T807   | 423. 2618345 | 806. 698 | 448989. 777  |
| M423T814   | 423. 2587603 | 814. 118 | 1046809. 84  |
| M423T837   | 423. 3249881 | 836. 769 | 428711. 9655 |
| M424T398_1 | 424. 1144376 | 397. 585 | 6271298. 835 |
| M424T427   | 424. 1250703 | 426. 913 | 3648058. 679 |
| M424T508   | 424. 1229981 | 507. 55  | 1453247. 233 |
| M424T398_2 | 424. 1251266 | 397. 585 | 14326149. 22 |
| M424T346   | 424. 1459161 | 345. 761 | 1326571. 643 |
| M424T372   | 424. 1460343 | 371. 633 | 2872846. 676 |
| M424T615   | 424. 1535685 | 615. 38  | 687159. 7345 |
| M424T588_1 | 424. 1563277 | 587. 595 | 14993006. 9  |
| M424T640   | 424. 1586448 | 640. 057 | 916854. 5395 |
| M424T588_2 | 424. 1677135 | 587. 595 | 8689994. 866 |
| M424T581   | 424. 2163536 | 581. 442 | 729736. 9043 |
| M424T438   | 424. 216396  | 437. 734 | 717574. 0752 |
| M424T450   | 424. 2164524 | 450. 052 | 387827. 4593 |
| M425T77    | 424. 8964151 | 77. 2263 | 12412843. 45 |
| M425T581   | 425. 0444368 | 581. 442 | 1334185. 537 |
| M425T467   | 425. 0817236 | 467. 127 | 269123. 8355 |
| M425T68_1  | 425. 0898035 | 67. 6441 | 767957. 4182 |
| M425T730   | 425. 1000107 | 730. 264 | 472576. 9124 |
| M425T68_2  | 425. 1047151 | 67. 6441 | 19181. 43586 |
| M425T163   | 425. 1272186 | 162. 615 | 1345973. 402 |
| M425T398   | 425. 1295603 | 397. 585 | 2970252. 165 |
| M425T98    | 425. 1275454 | 97. 682  | 40148413. 84 |
| M425T199   | 425. 1264377 | 198. 821 | 998197. 745  |
| M425T631   | 425. 1335789 | 630. 737 | 3074803. 783 |
| M425T614   | 425. 1357701 | 613. 824 | 3877354. 05  |
| M425T433_1 | 425. 1647383 | 433. 06  | 14237876. 62 |
| M425T306   | 425. 1648634 | 306. 164 | 12736745. 29 |
| M425T331   | 425. 1649651 | 330. 552 | 3188898. 824 |
| M425T586   | 425. 1628207 | 586. 044 | 3561478. 675 |
| M425T318   | 425. 1647674 | 318. 232 | 7211785. 068 |
| M425T623   | 425. 1770688 | 623. 098 | 814439. 6054 |



|            |              |          |              |
|------------|--------------|----------|--------------|
| M425T433_2 | 425. 1759326 | 433. 06  | 1993506. 224 |
| M425T540   | 425. 1770941 | 540. 152 | 15295669. 9  |
| M425T422   | 425. 1759532 | 422. 362 | 774194. 2267 |
| M425T637   | 425. 1771989 | 636. 925 | 1144581. 683 |
| M425T452   | 425. 1918945 | 451. 616 | 1710361. 256 |
| M425T504   | 425. 2000479 | 504. 432 | 14507204. 68 |
| M426T68    | 425. 5913259 | 67. 6441 | 243287. 2484 |
| M426T478   | 426. 1120052 | 477. 982 | 837384. 7772 |
| M426T323   | 426. 1198992 | 322. 862 | 1945444. 01  |
| M426T312_1 | 426. 1196049 | 312. 058 | 5220980. 235 |
| M426T99    | 426. 1309269 | 98. 9649 | 4685687. 921 |
| M426T312_2 | 426. 1310148 | 312. 058 | 4796770. 311 |
| M426T514   | 426. 139429  | 513. 768 | 2947880. 375 |
| M426T391   | 426. 1424823 | 391. 341 | 1837276. 305 |
| M426T337   | 426. 1424645 | 336. 681 | 1934569. 643 |
| M426T503   | 426. 1391645 | 502. 873 | 3114180. 969 |
| M426T410   | 426. 1601241 | 409. 881 | 2006965. 78  |
| M426T352   | 426. 1645368 | 351. 663 | 915616. 5492 |
| M426T362   | 426. 1644635 | 362. 384 | 3574363. 874 |
| M426T537   | 426. 1691446 | 537. 051 | 23997198. 85 |
| M426T433   | 426. 1716273 | 433. 06  | 2041227. 324 |
| M426T306   | 426. 1707733 | 306. 164 | 2687280. 668 |
| M427T497   | 427. 0958482 | 496. 646 | 277954. 4169 |
| M427T299   | 427. 1063205 | 298. 619 | 914047. 6807 |
| M427T218   | 427. 1061959 | 218. 43  | 633156. 8293 |
| M427T182   | 427. 118801  | 182. 156 | 481606. 9918 |
| M427T631   | 427. 1313264 | 630. 737 | 691567. 5278 |
| M427T614   | 427. 1314222 | 613. 824 | 1049082. 283 |
| M427T439   | 427. 1331829 | 439. 27  | 674798. 4401 |
| M427T583   | 427. 1503203 | 582. 96  | 4093149. 599 |
| M427T382   | 427. 1587887 | 382. 171 | 1048393. 465 |
| M427T537   | 427. 1755387 | 537. 051 | 4982713. 15  |
| M427T459   | 427. 1817655 | 459. 324 | 14342720. 43 |
| M427T419   | 427. 1880073 | 419. 237 | 2774875. 259 |
| M427T704   | 427. 2213971 | 704. 046 | 547695. 083  |
| M427T769   | 427. 2319755 | 768. 696 | 1989767. 334 |
| M427T781   | 427. 23205   | 780. 958 | 1051942. 47  |
| M427T756   | 427. 2321837 | 756. 343 | 1667269. 058 |
| M427T384   | 427. 2507892 | 383. 727 | 5312434. 389 |
| M427T735   | 427. 2569613 | 734. 901 | 2453033. 631 |
| M428T290   | 428. 1021683 | 289. 534 | 856371. 5342 |
| M428T184   | 428. 1021844 | 183. 708 | 4052311. 321 |
| M428T215   | 428. 1022474 | 215. 4   | 2564130. 013 |
| M428T200   | 428. 1023002 | 200. 362 | 2956794. 807 |
| M428T170   | 428. 1021079 | 170. 049 | 2981460. 261 |
| M428T379   | 428. 1253492 | 379. 066 | 3214205. 337 |
| M428T91    | 428. 1379521 | 90. 9026 | 8877757. 448 |
| M428T359_1 | 428. 1359481 | 359. 297 | 10184633. 26 |
| M428T583   | 428. 1530013 | 582. 96  | 803970. 4753 |
| M428T359_2 | 428. 1504841 | 359. 297 | 2567466. 626 |
| M428T428   | 428. 1653239 | 428. 448 | 382112. 5428 |
| M428T375   | 428. 1755641 | 374. 746 | 1449316. 897 |
| M428T548   | 428. 1904489 | 547. 805 | 413742. 1663 |
| M428T459   | 428. 1934895 | 459. 324 | 415676. 881  |

|            |              |          |              |
|------------|--------------|----------|--------------|
| M428T384   | 428. 2576532 | 383. 727 | 1212869. 263 |
| M429T69    | 428. 9767419 | 69. 1983 | 615494. 3158 |
| M429T352   | 429. 1036409 | 351. 663 | 281547. 8676 |
| M429T193   | 429. 1203634 | 192. 769 | 2379185. 342 |
| M429T528   | 429. 1178006 | 527. 688 | 239625. 6035 |
| M429T293   | 429. 1226815 | 292. 621 | 29295369. 68 |
| M429T94    | 429. 1248321 | 94. 1615 | 121664007. 5 |
| M429T158   | 429. 1225415 | 158. 1   | 4374278. 144 |
| M429T262   | 429. 1226781 | 262. 302 | 6790574. 906 |
| M429T252   | 429. 12276   | 251. 727 | 13984968. 02 |
| M429T379   | 429. 1286017 | 379. 066 | 467832. 1974 |
| M429T335_1 | 429. 136707  | 335. 153 | 1428262. 756 |
| M429T475   | 429. 137514  | 474. 888 | 764022. 6207 |
| M429T347_1 | 429. 1492472 | 347. 166 | 494269. 6033 |
| M429T583   | 429. 1521232 | 582. 96  | 798573. 0276 |
| M429T335_2 | 429. 1608201 | 335. 153 | 3294507. 034 |
| M429T347_2 | 429. 1607034 | 347. 166 | 3295813. 1   |
| M429T324   | 429. 1611386 | 324. 413 | 1440039. 103 |
| M429T419   | 429. 1754177 | 419. 237 | 1025461. 694 |
| M429T476   | 429. 2112819 | 476. 451 | 1614289. 548 |
| M429T490   | 429. 2111413 | 490. 434 | 1768706. 874 |
| M429T564   | 429. 2113451 | 564. 487 | 4260968. 143 |
| M429T709   | 429. 236575  | 708. 697 | 242467. 9654 |
| M429T588   | 429. 2470706 | 587. 595 | 612047. 4868 |
| M429T816   | 429. 2449649 | 815. 664 | 1719486. 27  |
| M430T413   | 430. 0962424 | 413. 006 | 937747. 8645 |
| M430T712   | 430. 1108992 | 711. 794 | 947366. 9751 |
| M430T181   | 430. 1192079 | 180. 601 | 217325. 1778 |
| M430T262   | 430. 1251934 | 262. 302 | 972708. 9007 |
| M430T415   | 430. 1322701 | 414. 571 | 474264. 2574 |
| M430T293   | 430. 126483  | 292. 621 | 4709126. 778 |
| M430T252   | 430. 1255366 | 251. 727 | 2007905. 959 |
| M430T184   | 430. 1467129 | 183. 708 | 1020570. 729 |
| M430T314   | 430. 1456959 | 313. 612 | 392236. 6869 |
| M430T359   | 430. 1457053 | 359. 297 | 671273. 6451 |
| M430T324   | 430. 1456994 | 324. 413 | 986319. 2047 |
| M430T199   | 430. 1468638 | 198. 821 | 919656. 2977 |
| M430T373   | 430. 1490865 | 373. 196 | 1000092. 242 |
| M430T404   | 430. 1553832 | 403. 698 | 2376411. 554 |
| M430T92    | 430. 1552257 | 91. 9113 | 30306909. 55 |
| M430T583   | 430. 1679795 | 582. 96  | 762712. 7693 |
| M430T394   | 430. 1718974 | 394. 467 | 131516. 6059 |
| M431T704   | 430. 8805048 | 704. 046 | 350438. 6688 |
| M431T67_1  | 430. 9602697 | 67. 1831 | 334226. 8433 |
| M431T67_2  | 431. 0725923 | 67. 1831 | 65344. 97451 |
| M431T543   | 431. 0960171 | 543. 216 | 1717057. 923 |
| M431T355   | 431. 1154087 | 354. 719 | 3608009. 456 |
| M431T391   | 431. 1151194 | 391. 341 | 2640132. 192 |
| M431T370   | 431. 1150964 | 370. 115 | 3587860. 505 |
| M431T320   | 431. 1142186 | 319. 785 | 5897494. 275 |
| M431T293   | 431. 126048  | 292. 621 | 1292630. 529 |
| M431T254   | 431. 127869  | 253. 674 | 426651. 7653 |
| M431T102   | 431. 1362999 | 101. 563 | 94726436. 47 |
| M431T95    | 431. 1363928 | 95. 2383 | 207498271. 9 |

|            |              |          |              |
|------------|--------------|----------|--------------|
| M431T438   | 431. 1316237 | 437. 734 | 776970. 3717 |
| M431T427   | 431. 1577426 | 426. 913 | 2591149. 542 |
| M431T810   | 431. 1614222 | 809. 797 | 2096172. 609 |
| M431T467   | 431. 1661202 | 467. 127 | 475219. 0935 |
| M431T796   | 431. 1613449 | 796. 202 | 1970874. 003 |
| M431T703_1 | 431. 1682752 | 702. 622 | 136730632. 1 |
| M431T721   | 431. 1682989 | 721. 058 | 55238264. 73 |
| M431T766   | 431. 1683646 | 765. 588 | 5986793. 62  |
| M431T819   | 431. 1685089 | 818. 743 | 2921659. 679 |
| M431T778_1 | 431. 1683136 | 777. 92  | 6151115. 247 |
| M431T752_1 | 431. 1683164 | 751. 766 | 7138674. 391 |
| M431T733   | 431. 1682784 | 733. 352 | 17469461. 7  |
| M431T835   | 431. 1681645 | 835. 329 | 1868833. 445 |
| M431T805   | 431. 1756785 | 805. 145 | 3450416. 855 |
| M431T703_2 | 431. 1788681 | 702. 622 | 61612717. 4  |
| M431T778_2 | 431. 1788835 | 777. 92  | 2793300. 052 |
| M431T462   | 431. 189456  | 462. 446 | 10287652. 59 |
| M431T732   | 431. 1788587 | 731. 793 | 7887408. 581 |
| M431T752_2 | 431. 1788953 | 751. 766 | 3439007. 774 |
| M431T452   | 431. 18946   | 451. 616 | 9644028. 42  |
| M431T501   | 431. 1890978 | 501. 318 | 3287076. 007 |
| M431T584   | 431. 2276272 | 584. 484 | 2248306. 575 |
| M431T789   | 431. 2616411 | 788. 604 | 5651077. 078 |
| M431T703_3 | 431. 4570596 | 702. 622 | 238341. 0791 |
| M432T158   | 432. 0974514 | 158. 1   | 18326033. 73 |
| M432T176   | 432. 0974555 | 176. 104 | 19663563. 33 |
| M432T109   | 432. 097148  | 109. 475 | 3962847. 736 |
| M432T149   | 432. 0974428 | 148. 981 | 9330366. 585 |
| M432T130   | 432. 0973054 | 129. 827 | 12922148. 25 |
| M432T370   | 432. 1211206 | 370. 115 | 513105. 3056 |
| M432T712   | 432. 1274077 | 711. 794 | 2894363. 89  |
| M432T293_1 | 432. 1316021 | 292. 621 | 17679230. 47 |
| M432T428   | 432. 1321012 | 428. 448 | 207765. 8694 |
| M432T103   | 432. 1417484 | 102. 948 | 13921679. 38 |
| M432T95    | 432. 1419141 | 95. 2383 | 41156025     |
| M432T293_2 | 432. 1431953 | 292. 621 | 7788428. 333 |
| M432T372   | 432. 1556356 | 371. 633 | 1142636. 153 |
| M432T703   | 432. 1698767 | 702. 622 | 30824777. 79 |
| M432T720   | 432. 1699496 | 719. 505 | 12388022. 3  |
| M432T778   | 432. 1702847 | 777. 92  | 959063. 5129 |
| M432T732   | 432. 1697742 | 731. 793 | 4094746. 135 |
| M432T462   | 432. 193358  | 462. 446 | 2291616. 565 |
| M432T452   | 432. 1934634 | 451. 616 | 1735836. 123 |
| M432T789   | 432. 2677557 | 788. 604 | 941382. 763  |
| M432T834   | 432. 3297026 | 833. 866 | 910008. 5524 |
| M433T293_1 | 433. 097993  | 292. 621 | 1293755. 773 |
| M433T175   | 433. 107028  | 174. 576 | 3934569. 856 |
| M433T481   | 433. 1107725 | 481. 089 | 857352. 7657 |
| M433T500   | 433. 1108642 | 499. 759 | 7385518. 26  |
| M433T492   | 433. 1108222 | 491. 99  | 5167469. 772 |
| M433T453_1 | 433. 1237514 | 453. 126 | 1171359. 428 |
| M433T453_2 | 433. 1365891 | 453. 126 | 6303494. 615 |
| M433T293_2 | 433. 1360689 | 292. 621 | 2715972. 392 |
| M433T568_1 | 433. 1406072 | 567. 543 | 2402148. 405 |

|            |              |           |              |
|------------|--------------|-----------|--------------|
| M433T381   | 433. 1427851 | 380. 608  | 312450. 6857 |
| M433T568_2 | 433. 1620108 | 567. 543  | 1831963. 678 |
| M433T372   | 433. 1693257 | 371. 633  | 842196. 7864 |
| M433T469   | 433. 1647673 | 468. 69   | 108775. 9987 |
| M433T703   | 433. 1764292 | 702. 622  | 6323948. 529 |
| M433T732   | 433. 176195  | 731. 793  | 385980. 069  |
| M433T668   | 433. 1836413 | 667. 612  | 6760916. 328 |
| M433T683_1 | 433. 1835988 | 682. 948  | 27066969. 23 |
| M433T718   | 433. 1813632 | 717. 942  | 1100495. 853 |
| M433T683_2 | 433. 1985463 | 682. 948  | 911937. 9731 |
| M433T45    | 433. 2045092 | 45. 41155 | 174153. 5563 |
| M433T559   | 433. 2048893 | 558. 574  | 542710. 9041 |
| M433T470   | 433. 2049641 | 470. 253  | 4207181. 237 |
| M433T33    | 433. 2050308 | 32. 8715  | 540253. 9483 |
| M433T60    | 433. 2049585 | 60. 4002  | 843770. 8197 |
| M433T441   | 433. 204788  | 440. 833  | 2253824. 401 |
| M433T799   | 433. 2048797 | 799. 306  | 660264. 2385 |
| M433T459   | 433. 2054029 | 459. 324  | 2554163. 167 |
| M433T501   | 433. 2048831 | 501. 318  | 3280941. 255 |
| M433T489   | 433. 2256604 | 488. 885  | 149688. 8507 |
| M433T805   | 433. 2348602 | 805. 145  | 52409390. 07 |
| M433T835   | 433. 2353623 | 835. 329  | 2550704. 54  |
| M433T514   | 433. 2413055 | 513. 768  | 506875. 8081 |
| M433T720   | 433. 2564404 | 719. 505  | 472671. 0772 |
| M433T65    | 433. 4080542 | 65. 0166  | 328173. 9455 |
| M434T65    | 433. 9112365 | 65. 4825  | 71525. 50853 |
| M434T75    | 433. 9606164 | 74. 6705  | 3122886. 691 |
| M434T425   | 434. 0913028 | 425. 439  | 595857. 8376 |
| M434T413   | 434. 0933307 | 413. 006  | 1031962. 935 |
| M434T176   | 434. 102003  | 176. 104  | 382468. 8249 |
| M434T146   | 434. 110609  | 146. 08   | 1206322. 429 |
| M434T317   | 434. 1299453 | 316. 709  | 424465. 3958 |
| M434T419   | 434. 123964  | 419. 237  | 1124095. 512 |
| M434T480   | 434. 1450066 | 479. 541  | 970533. 2999 |
| M434T294   | 434. 1384288 | 294. 152  | 511089. 8811 |
| M434T723   | 434. 147416  | 722. 604  | 1707946. 456 |
| M434T710   | 434. 1472025 | 710. 246  | 5607715. 584 |
| M434T432   | 434. 1621161 | 431. 507  | 1474444. 247 |
| M434T309   | 434. 1752528 | 309. 091  | 7534011. 928 |
| M434T293   | 434. 1749904 | 292. 621  | 17895183. 18 |
| M434T261   | 434. 172735  | 261. 138  | 3299272. 312 |
| M434T703   | 434. 177119  | 702. 622  | 439046. 4236 |
| M434T683   | 434. 1879784 | 682. 948  | 6815050. 776 |
| M434T552   | 434. 2028024 | 552. 493  | 1811403. 967 |
| M434T390   | 434. 2112153 | 389. 839  | 1125222. 218 |
| M434T470   | 434. 2095347 | 470. 253  | 664130. 878  |
| M434T459   | 434. 2111494 | 459. 324  | 556383. 4385 |
| M434T784   | 434. 2217187 | 784. 051  | 622215. 261  |
| M434T805   | 434. 2371949 | 805. 145  | 12115241. 27 |
| M435T291_1 | 435. 1246209 | 291. 076  | 381140. 5442 |
| M435T356   | 435. 122656  | 356. 274  | 3398451. 817 |
| M435T370   | 435. 1228804 | 370. 115  | 2752618. 047 |
| M435T425   | 435. 1301998 | 425. 439  | 7257948. 182 |
| M435T552   | 435. 1397879 | 552. 493  | 266993. 1721 |

|            |              |          |              |
|------------|--------------|----------|--------------|
| M435T367   | 435. 1460962 | 367. 026 | 1731479. 307 |
| M435T449_1 | 435. 1484263 | 448. 527 | 880603. 2057 |
| M435T710   | 435. 1464932 | 710. 246 | 1321995. 206 |
| M435T378   | 435. 1463403 | 377. 64  | 2151593. 378 |
| M435T449_2 | 435. 1595449 | 448. 527 | 187007. 6907 |
| M435T595   | 435. 1685469 | 595. 35  | 352576. 3084 |
| M435T288   | 435. 1690591 | 287. 981 | 520705. 9534 |
| M435T291_2 | 435. 1811934 | 291. 076 | 2675278. 001 |
| M435T456   | 435. 2075735 | 456. 2   | 303235. 1689 |
| M435T661   | 435. 2130482 | 661. 453 | 899676. 9329 |
| M435T693   | 435. 2126927 | 692. 781 | 1110029. 255 |
| M435T672   | 435. 2130492 | 672. 229 | 1029603. 133 |
| M435T462   | 435. 221856  | 462. 446 | 1615702. 148 |
| M435T450   | 435. 2195527 | 450. 052 | 1136650. 43  |
| M435T805   | 435. 2364238 | 805. 145 | 1673237. 525 |
| M435T33    | 435. 2478861 | 32. 8715 | 324273. 8099 |
| M435T832   | 435. 2496755 | 832. 338 | 12870328. 07 |
| M435T626   | 435. 2669199 | 626. 183 | 1143852. 148 |
| M436T75_1  | 435. 9524486 | 74. 6705 | 35812098. 2  |
| M436T75_2  | 435. 964909  | 74. 6705 | 15021273. 9  |
| M436T358   | 436. 0149625 | 357. 746 | 1149641. 935 |
| M436T379_1 | 436. 1035231 | 379. 066 | 1469662. 512 |
| M436T369   | 436. 1251925 | 368. 559 | 792984. 2169 |
| M436T221   | 436. 118538  | 221. 453 | 939156. 6156 |
| M436T379_2 | 436. 114305  | 379. 066 | 1253641. 467 |
| M436T571   | 436. 1228588 | 570. 599 | 531856. 0476 |
| M436T294   | 436. 120632  | 294. 152 | 967234. 949  |
| M436T584   | 436. 1232968 | 584. 484 | 1121453. 644 |
| M436T415   | 436. 1294753 | 414. 571 | 762229. 5665 |
| M436T512   | 436. 1313475 | 512. 228 | 192303. 2607 |
| M436T427   | 436. 1295858 | 426. 913 | 1036325. 845 |
| M436T738   | 436. 1565618 | 737. 955 | 1007442. 289 |
| M436T674_1 | 436. 1575344 | 673. 771 | 16161790. 26 |
| M436T674_2 | 436. 1691026 | 673. 771 | 4967314. 523 |
| M436T438   | 436. 1786113 | 437. 734 | 531100. 4639 |
| M436T497   | 436. 2137034 | 496. 646 | 1930519. 178 |
| M436T518   | 436. 2201199 | 518. 474 | 3481491. 061 |
| M436T529   | 436. 2183652 | 529. 248 | 1678674. 26  |
| M436T831   | 436. 254902  | 830. 813 | 2901284. 801 |
| M437T497   | 436. 7175822 | 496. 646 | 1180031. 595 |
| M437T75    | 436. 9641588 | 74. 6705 | 6022859. 958 |
| M437T118   | 437. 0766776 | 117. 954 | 2515713. 995 |
| M437T108   | 437. 07673   | 108. 082 | 1388416. 183 |
| M437T121   | 437. 0917535 | 120. 945 | 2312178. 864 |
| M437T813   | 437. 1042642 | 812. 68  | 22048670. 77 |
| M437T755   | 437. 1041137 | 754. 814 | 5784445. 861 |
| M437T779   | 437. 1043227 | 779. 407 | 10054183. 06 |
| M437T801   | 437. 1042226 | 800. 683 | 11116822. 01 |
| M437T379   | 437. 1091034 | 379. 066 | 529602. 0017 |
| M437T291   | 437. 1253616 | 291. 076 | 270612. 2136 |
| M437T472   | 437. 1417562 | 471. 768 | 1227405. 71  |
| M437T464   | 437. 1415592 | 464. 011 | 583759. 7947 |
| M437T350   | 437. 1524182 | 350. 108 | 673029. 9715 |
| M437T411   | 437. 2002354 | 411. 444 | 2873590. 203 |

|            |              |          |              |
|------------|--------------|----------|--------------|
| M437T419   | 437. 2003598 | 419. 237 | 2155546. 862 |
| M437T517   | 437. 2243991 | 516. 908 | 798958. 2593 |
| M437T534   | 437. 2291883 | 533. 931 | 139792. 4598 |
| M437T525   | 437. 2289045 | 524. 56  | 321273. 7305 |
| M437T804   | 437. 2334523 | 803. 615 | 1828800. 077 |
| M438T819   | 438. 1099506 | 818. 743 | 2773656. 461 |
| M438T778   | 438. 1058314 | 777. 92  | 1995664. 234 |
| M438T758   | 438. 1099774 | 757. 881 | 1121517. 654 |
| M438T804   | 438. 1102045 | 803. 615 | 4404461. 395 |
| M438T835   | 438. 1056361 | 835. 329 | 2233351. 184 |
| M438T181   | 438. 1267217 | 180. 601 | 1109171. 202 |
| M438T203_1 | 438. 1228873 | 203. 346 | 7804793. 791 |
| M438T321   | 438. 1230189 | 321. 312 | 8601639. 624 |
| M438T194   | 438. 1229196 | 194. 243 | 4826783. 022 |
| M438T452   | 438. 1232148 | 451. 616 | 620080. 1241 |
| M438T537   | 438. 1429514 | 537. 051 | 14622222. 89 |
| M438T203_2 | 438. 136117  | 203. 346 | 724361. 172  |
| M438T436   | 438. 1381955 | 436. 18  | 313773. 3495 |
| M438T297   | 438. 1364266 | 297. 149 | 1509975. 469 |
| M438T106   | 438. 1581052 | 105. 537 | 6684487. 929 |
| M438T489   | 438. 162197  | 488. 885 | 2344817. 281 |
| M438T697   | 438. 1787421 | 697. 061 | 822053. 2759 |
| M439T75    | 438. 9636305 | 74. 6705 | 4772186. 195 |
| M439T68    | 439. 0705107 | 67. 6441 | 7517830. 281 |
| M439T102   | 439. 0840261 | 101. 563 | 14929257. 3  |
| M439T93    | 439. 0840234 | 92. 9618 | 20112359. 07 |
| M439T391   | 439. 1018371 | 391. 341 | 220050. 7285 |
| M439T817   | 439. 1028383 | 817. 214 | 5177749. 338 |
| M439T766   | 439. 1029346 | 765. 588 | 1915559. 169 |
| M439T778   | 439. 1029581 | 777. 92  | 4015431. 162 |
| M439T508   | 439. 0966666 | 507. 55  | 1697697. 944 |
| M439T492_1 | 439. 0966587 | 491. 99  | 2231994. 849 |
| M439T802   | 439. 1026762 | 802. 116 | 3612772. 29  |
| M439T835   | 439. 1029046 | 835. 329 | 3978510. 802 |
| M439T753   | 439. 1029865 | 753. 315 | 1335575. 745 |
| M439T106   | 439. 1074744 | 105. 537 | 2271617. 546 |
| M439T826   | 439. 1073537 | 826. 333 | 2305549. 367 |
| M439T349_1 | 439. 1235298 | 348. 668 | 1675428. 941 |
| M439T194   | 439. 1249667 | 194. 243 | 698207. 6255 |
| M439T203   | 439. 1255387 | 203. 346 | 1048354. 654 |
| M439T535   | 439. 1404364 | 535. 488 | 1484792. 211 |
| M439T221   | 439. 1458629 | 221. 453 | 1357747. 446 |
| M439T197_1 | 439. 1454371 | 197. 335 | 5841102. 351 |
| M439T297   | 439. 1438905 | 297. 149 | 652420. 7604 |
| M439T554   | 439. 1424093 | 554. 027 | 862061. 4105 |
| M439T687   | 439. 1511448 | 687. 214 | 448084. 4377 |
| M439T179   | 439. 1580346 | 179. 046 | 2767707. 309 |
| M439T197_2 | 439. 1576333 | 197. 335 | 11717538. 52 |
| M439T422   | 439. 1573905 | 422. 362 | 1555705. 146 |
| M439T294   | 439. 1575459 | 294. 152 | 2706927. 351 |
| M439T220   | 439. 1578159 | 219. 979 | 4138692. 987 |
| M439T349_2 | 439. 1703375 | 348. 668 | 854770. 3353 |
| M439T486   | 439. 166973  | 485. 784 | 824698. 1175 |
| M439T495   | 439. 1796751 | 495. 125 | 22660069. 99 |

|            |              |          |              |
|------------|--------------|----------|--------------|
| M439T484   | 439. 1795974 | 484. 221 | 7932064. 837 |
| M439T394   | 439. 1795944 | 394. 467 | 1074154. 183 |
| M439T796   | 439. 1876156 | 796. 202 | 890018. 7789 |
| M439T436   | 439. 2078835 | 436. 18  | 2600748. 052 |
| M439T492_2 | 439. 2076157 | 491. 99  | 2134562. 638 |
| M440T68    | 440. 0734716 | 67. 6441 | 1349461. 269 |
| M440T294   | 440. 1018452 | 294. 152 | 737077. 8134 |
| M440T464   | 440. 1172336 | 464. 011 | 327735. 9703 |
| M440T296   | 440. 1406969 | 295. 704 | 211660. 9139 |
| M440T478   | 440. 154635  | 477. 982 | 444779. 792  |
| M440T532   | 440. 1545112 | 532. 372 | 5717983. 722 |
| M440T432   | 440. 1693473 | 431. 507 | 388551. 4965 |
| M440T158   | 440. 176562  | 158. 1   | 6339090. 249 |
| M440T571   | 440. 1895737 | 570. 599 | 7341441. 577 |
| M440T584   | 440. 1895421 | 584. 484 | 3230577. 259 |
| M440T492   | 440. 2113295 | 491. 99  | 519098. 9319 |
| M440T661   | 440. 2793445 | 661. 453 | 287225. 7643 |
| M441T425   | 441. 105796  | 425. 439 | 898618. 764  |
| M441T396   | 441. 1130768 | 396. 023 | 2079959. 872 |
| M441T103   | 441. 1239704 | 102. 948 | 10014364. 34 |
| M441T427   | 441. 1171031 | 426. 913 | 2107732. 134 |
| M441T293   | 441. 1353186 | 292. 621 | 1307627. 04  |
| M441T203   | 441. 1368695 | 203. 346 | 483036. 8099 |
| M441T388_1 | 441. 150045  | 388. 326 | 461083. 8826 |
| M441T314   | 441. 1480587 | 313. 612 | 249892. 0139 |
| M441T532   | 441. 1571941 | 532. 372 | 1194906. 565 |
| M441T346   | 441. 1612815 | 345. 761 | 1231963. 123 |
| M441T628   | 441. 1656644 | 627. 731 | 778786. 9141 |
| M441T158   | 441. 1787902 | 158. 1   | 700345. 8734 |
| M441T568   | 441. 1767101 | 567. 543 | 119491288. 7 |
| M441T522_1 | 441. 1811072 | 521. 5   | 983630. 1363 |
| M441T511   | 441. 1816936 | 510. 673 | 3157771. 959 |
| M441T388_2 | 441. 1894877 | 388. 326 | 253193. 1652 |
| M441T534_1 | 441. 1942992 | 533. 931 | 3965087. 325 |
| M441T522_2 | 441. 194294  | 521. 5   | 47361914. 58 |
| M441T522_3 | 441. 2052764 | 521. 5   | 14281170. 3  |
| M441T534_2 | 441. 2051343 | 533. 931 | 1191693. 189 |
| M441T407   | 441. 2456582 | 406. 813 | 596068. 5923 |
| M442T615   | 442. 0569635 | 615. 38  | 489942. 4696 |
| M442T398   | 442. 1162827 | 397. 585 | 516287. 2268 |
| M442T331   | 442. 1317252 | 330. 552 | 1109577. 721 |
| M442T387   | 442. 1361156 | 386. 78  | 1191060. 628 |
| M442T450   | 442. 1339435 | 450. 052 | 1291175. 975 |
| M442T433   | 442. 1560532 | 433. 06  | 4864552. 742 |
| M442T540   | 442. 1620335 | 540. 152 | 3950600. 226 |
| M442T416   | 442. 1561639 | 416. 128 | 3140087. 675 |
| M442T404   | 442. 1564105 | 403. 698 | 1936405. 91  |
| M442T568   | 442. 1803484 | 567. 543 | 26322224. 69 |
| M442T522   | 442. 1980195 | 521. 5   | 9351272. 726 |
| M442T467   | 442. 1977859 | 467. 127 | 1088415. 854 |
| M442T600   | 442. 2066977 | 599. 904 | 8074338. 63  |
| M442T608   | 442. 2067274 | 607. 625 | 10520759. 22 |
| M442T353   | 442. 2304148 | 353. 163 | 142949. 7799 |
| M442T622   | 442. 2908466 | 621. 547 | 1270271. 081 |

|            |             |         |             |
|------------|-------------|---------|-------------|
| M443T326   | 443.0610422 | 325.901 | 527993.0868 |
| M443T381   | 443.1165163 | 380.608 | 631505.4349 |
| M443T419   | 443.1296131 | 419.237 | 2114598.583 |
| M443T503   | 443.1298705 | 502.873 | 1100616.83  |
| M443T187   | 443.1364215 | 186.689 | 10082394.6  |
| M443T98    | 443.1386882 | 97.682  | 22025168.33 |
| M443T394   | 443.1432555 | 394.467 | 446631.4872 |
| M443T407   | 443.1428606 | 406.813 | 926038.4285 |
| M443T433   | 443.1561019 | 433.06  | 924903.3283 |
| M443T416   | 443.1606583 | 416.128 | 473934.6465 |
| M443T540   | 443.1737647 | 540.152 | 795849.2969 |
| M443T358   | 443.1741449 | 357.746 | 4853355.458 |
| M443T568_1 | 443.1817575 | 567.543 | 5019108.724 |
| M443T320   | 443.1763233 | 319.785 | 13791427.25 |
| M443T568_2 | 443.1943758 | 567.543 | 16978826.32 |
| M443T508   | 443.1914955 | 507.55  | 1775247.584 |
| M443T549   | 443.1944025 | 549.371 | 4489947.343 |
| M443T600   | 443.2094406 | 599.904 | 1812472.217 |
| M443T608   | 443.209477  | 607.625 | 2239178.126 |
| M443T703   | 443.2271078 | 702.622 | 2193888.291 |
| M443T589   | 443.2290703 | 589.157 | 2069099.743 |
| M443T517   | 443.2447954 | 516.908 | 5141730.692 |
| M444T517   | 443.7476689 | 516.908 | 3085190.678 |
| M444T535   | 444.0183706 | 535.488 | 644095.2791 |
| M444T294_1 | 444.097744  | 294.152 | 558084.2485 |
| M444T218   | 444.0958109 | 218.43  | 3463836.11  |
| M444T441   | 444.1221932 | 440.833 | 2446103.784 |
| M444T318   | 444.1337985 | 318.232 | 1242971.607 |
| M444T802   | 444.129249  | 802.116 | 885428.2488 |
| M444T187   | 444.1422266 | 186.689 | 1564878.162 |
| M444T350   | 444.14679   | 350.108 | 2273104.849 |
| M444T359   | 444.1485813 | 359.297 | 1737481.157 |
| M444T321   | 444.1579013 | 321.312 | 626563.5208 |
| M444T347   | 444.1580379 | 347.166 | 5926699.509 |
| M444T294_2 | 444.1600453 | 294.152 | 1128832.764 |
| M444T458_1 | 444.1690944 | 457.763 | 6544537.98  |
| M444T469   | 444.1691267 | 468.69  | 1575735.774 |
| M444T320   | 444.1801068 | 319.785 | 2526803.095 |
| M444T92    | 444.1747728 | 91.9113 | 9989679.465 |
| M444T458_2 | 444.1808502 | 457.763 | 1733258.58  |
| M444T568   | 444.1941556 | 567.543 | 3814182.527 |
| M445T82    | 445.1003626 | 81.8855 | 2610585.548 |
| M445T220   | 445.0982379 | 219.979 | 374665.6713 |
| M445T415   | 445.1095864 | 414.571 | 587069.6015 |
| M445T187   | 445.1448346 | 186.689 | 449391.7006 |
| M445T347   | 445.1612288 | 347.166 | 924029.6506 |
| M445T458   | 445.170145  | 457.763 | 1615221.41  |
| M445T749_1 | 445.1776878 | 748.742 | 6741704.375 |
| M445T767_1 | 445.1779176 | 767.145 | 1634060.139 |
| M445T749_2 | 445.1896803 | 748.742 | 10676220.64 |
| M445T767_2 | 445.1896014 | 767.145 | 2577378.439 |
| M445T559   | 445.203837  | 558.574 | 2148927.541 |
| M445T476   | 445.2074348 | 476.451 | 1530584.79  |
| M445T645   | 445.2429068 | 644.722 | 881117.0608 |



|            |              |          |              |
|------------|--------------|----------|--------------|
| M445T706   | 445. 2389822 | 705. 593 | 2094133. 965 |
| M445T605   | 445. 243028  | 604. 606 | 2172232. 906 |
| M445T543   | 445. 2430789 | 543. 216 | 2591605. 624 |
| M445T563   | 445. 2431768 | 562. 946 | 27387070. 56 |
| M445T591   | 445. 243205  | 590. 717 | 3857015. 202 |
| M446T535   | 446. 0167342 | 535. 488 | 294816. 7841 |
| M446T293_1 | 446. 1108156 | 292. 621 | 78478279. 05 |
| M446T193_1 | 446. 11099   | 192. 769 | 4279708. 688 |
| M446T252_1 | 446. 1109181 | 251. 727 | 15601957     |
| M446T261   | 446. 1108823 | 261. 138 | 11532069. 27 |
| M446T293_2 | 446. 124207  | 292. 621 | 32283645. 19 |
| M446T193_2 | 446. 1243192 | 192. 769 | 1686196. 126 |
| M446T262   | 446. 1246519 | 262. 302 | 4214612. 343 |
| M446T252_2 | 446. 1249957 | 251. 727 | 5697055. 835 |
| M446T415   | 446. 1392461 | 414. 571 | 874899. 2618 |
| M446T347_1 | 446. 1555278 | 347. 166 | 789011. 6874 |
| M446T347_2 | 446. 1669039 | 347. 166 | 577494. 1616 |
| M446T749   | 446. 1870132 | 748. 742 | 3530776. 038 |
| M446T710   | 446. 2461245 | 710. 246 | 191938. 1556 |
| M446T589   | 446. 2486926 | 589. 157 | 1188028. 167 |
| M446T563   | 446. 2450548 | 562. 946 | 3599354. 113 |
| M446T819   | 446. 345625  | 818. 743 | 4371909. 518 |
| M446T778   | 446. 3457381 | 777. 92  | 3015496. 08  |
| M446T835   | 446. 345757  | 835. 329 | 6955092. 399 |
| M446T801   | 446. 3500047 | 800. 683 | 5520345. 714 |
| M447T588   | 447. 0932942 | 587. 595 | 548998. 4568 |
| M447T532   | 447. 090971  | 532. 372 | 2755632. 02  |
| M447T691   | 447. 1078692 | 691. 303 | 496481. 3603 |
| M447T293_1 | 447. 1132281 | 292. 621 | 10217887. 96 |
| M447T350   | 447. 1154991 | 350. 108 | 306268. 2301 |
| M447T425   | 447. 1181389 | 425. 439 | 639806. 8981 |
| M447T358   | 447. 115692  | 357. 746 | 429957. 9312 |
| M447T252   | 447. 1201277 | 251. 727 | 2388971. 635 |
| M447T261   | 447. 1200991 | 261. 138 | 1335894. 481 |
| M447T229   | 447. 1270241 | 228. 961 | 542901. 629  |
| M447T393   | 447. 1227608 | 392. 905 | 586919. 2117 |
| M447T475   | 447. 126891  | 474. 888 | 319275. 758  |
| M447T100   | 447. 1336666 | 100. 283 | 8123476. 485 |
| M447T817   | 447. 13378   | 817. 214 | 33813398. 4  |
| M447T293_2 | 447. 1257403 | 292. 621 | 3473528. 287 |
| M447T715   | 447. 1335733 | 714. 841 | 1555372. 303 |
| M447T792   | 447. 1338292 | 791. 678 | 14136682. 58 |
| M447T778   | 447. 1336669 | 777. 92  | 13974744. 85 |
| M447T801   | 447. 1336471 | 800. 683 | 24134812. 27 |
| M447T764   | 447. 1336557 | 764. 034 | 7655352. 542 |
| M447T835   | 447. 1337856 | 835. 329 | 21033318. 32 |
| M447T753   | 447. 1336112 | 753. 315 | 4893087. 52  |
| M447T391   | 447. 1472336 | 391. 341 | 811944. 9807 |
| M447T441_1 | 447. 1469641 | 440. 833 | 14614406. 93 |
| M447T378   | 447. 1470866 | 377. 64  | 1697622. 934 |
| M447T450   | 447. 1470845 | 450. 052 | 10088502. 32 |
| M447T449   | 447. 1582824 | 448. 527 | 3240908. 726 |
| M447T458   | 447. 1605026 | 457. 763 | 2471908. 987 |
| M447T441_2 | 447. 1581682 | 440. 833 | 5197582. 781 |

|            |              |          |              |
|------------|--------------|----------|--------------|
| M447T657   | 447. 1626067 | 656. 84  | 686887. 8883 |
| M447T413   | 447. 1878039 | 413. 006 | 633832. 7584 |
| M447T432_1 | 447. 187413  | 431. 507 | 603028. 3538 |
| M447T373   | 447. 182693  | 373. 196 | 837079. 7276 |
| M447T432_2 | 447. 2177374 | 431. 507 | 4388604. 13  |
| M447T418   | 447. 2213455 | 417. 689 | 871243. 2686 |
| M447T600   | 447. 2269736 | 599. 904 | 1426616. 242 |
| M447T439   | 447. 230042  | 439. 27  | 13112432. 25 |
| M447T707   | 447. 2603903 | 707. 143 | 529081. 7141 |
| M448T253   | 448. 1149772 | 252. 703 | 746830. 8811 |
| M448T327_1 | 448. 1334383 | 327. 449 | 1669418. 582 |
| M448T789   | 448. 1353604 | 788. 604 | 4413132. 561 |
| M448T823   | 448. 135147  | 823. 375 | 5471009. 499 |
| M448T816   | 448. 1349147 | 815. 664 | 5179481. 505 |
| M448T741   | 448. 1352349 | 741. 077 | 449242. 0151 |
| M448T778   | 448. 1350864 | 777. 92  | 4353210. 202 |
| M448T758   | 448. 1350966 | 757. 881 | 2891604. 559 |
| M448T799   | 448. 1350803 | 799. 306 | 4181494. 198 |
| M448T340_1 | 448. 1335434 | 339. 772 | 1706905. 189 |
| M448T835   | 448. 1351494 | 835. 329 | 6584029. 449 |
| M448T388   | 448. 1460094 | 388. 326 | 596580. 7487 |
| M448T299   | 448. 1420307 | 298. 619 | 1170144. 987 |
| M448T378   | 448. 1462968 | 377. 64  | 983952. 1076 |
| M448T327_2 | 448. 1463889 | 327. 449 | 3974851. 654 |
| M448T441   | 448. 1485724 | 440. 833 | 2592074. 671 |
| M448T340_2 | 448. 1462825 | 339. 772 | 4791297. 14  |
| M448T450   | 448. 1486484 | 450. 052 | 1736870. 55  |
| M448T518   | 448. 1599859 | 518. 474 | 512759. 8402 |
| M448T752   | 448. 1569562 | 751. 766 | 589165. 4909 |
| M448T531   | 448. 1599432 | 530. 804 | 586773. 5058 |
| M448T805   | 448. 1689809 | 805. 145 | 937493. 9045 |
| M448T462_1 | 448. 1757498 | 462. 446 | 11715422. 39 |
| M448T452_1 | 448. 1762862 | 451. 616 | 4843155. 473 |
| M448T462_2 | 448. 1869256 | 462. 446 | 10994914. 1  |
| M448T452_2 | 448. 1880792 | 451. 616 | 4603761. 796 |
| M448T430   | 448. 2293868 | 429. 94  | 1479089. 831 |
| M448T439   | 448. 2325885 | 439. 27  | 2587692. 623 |
| M449T762   | 448. 964179  | 762. 482 | 1059048. 659 |
| M449T69    | 449. 0922137 | 69. 1983 | 173523. 7631 |
| M449T283   | 449. 1019256 | 282. 659 | 1640130. 602 |
| M449T200   | 449. 1014937 | 200. 362 | 1183574. 441 |
| M449T194   | 449. 108919  | 194. 243 | 912789. 7642 |
| M449T511   | 449. 1083812 | 510. 673 | 1315944. 384 |
| M449T350   | 449. 1262858 | 350. 108 | 1849978. 362 |
| M449T778   | 449. 1304555 | 777. 92  | 2355763. 857 |
| M449T766   | 449. 1328093 | 765. 588 | 1040825. 367 |
| M449T822   | 449. 1331126 | 821. 831 | 3045497. 97  |
| M449T799   | 449. 1340665 | 799. 306 | 3236394. 93  |
| M449T835_1 | 449. 130594  | 835. 329 | 3353907. 661 |
| M449T327   | 449. 1423469 | 327. 449 | 607911. 3642 |
| M449T438   | 449. 1470382 | 437. 734 | 723798. 5737 |
| M449T450   | 449. 1514118 | 450. 052 | 651672. 595  |
| M449T625   | 449. 1786206 | 624. 642 | 3975090. 145 |
| M449T462   | 449. 1808413 | 462. 446 | 3094700. 642 |

|            |              |          |              |
|------------|--------------|----------|--------------|
| M449T612   | 449. 1784949 | 612. 3   | 1092679. 017 |
| M449T452_1 | 449. 1807221 | 451. 616 | 1184331. 83  |
| M449T452_2 | 449. 1920454 | 451. 616 | 510408. 6236 |
| M449T436   | 449. 1985352 | 436. 18  | 606546. 3097 |
| M449T428   | 449. 2054553 | 428. 448 | 1045894. 304 |
| M449T646   | 449. 219298  | 646. 257 | 1260886. 969 |
| M449T430   | 449. 2357039 | 429. 94  | 979405. 8773 |
| M449T669   | 449. 2734532 | 669. 12  | 7830912. 721 |
| M449T835_2 | 449. 3096869 | 835. 329 | 1969463. 661 |
| M450T349   | 450. 0989061 | 348. 668 | 613264. 4291 |
| M450T594   | 450. 1394968 | 593. 841 | 797515. 8709 |
| M450T617   | 450. 1396604 | 616. 891 | 3897614. 577 |
| M450T470   | 450. 193484  | 470. 253 | 1302966. 465 |
| M450T481   | 450. 1958841 | 481. 089 | 780443. 2002 |
| M450T512   | 450. 200189  | 512. 228 | 576349. 2139 |
| M450T459   | 450. 2007191 | 459. 324 | 1573939. 973 |
| M450T490   | 450. 1962656 | 490. 434 | 953584. 0713 |
| M450T503   | 450. 1959691 | 502. 873 | 1243962. 345 |
| M450T669   | 450. 277221  | 669. 12  | 1839297. 343 |
| M451T78    | 451. 0350813 | 78. 2661 | 106380305. 3 |
| M451T284   | 451. 1008539 | 283. 634 | 397600. 7672 |
| M451T300   | 451. 1173064 | 300. 176 | 1758624. 088 |
| M451T290   | 451. 121476  | 289. 534 | 586555. 4149 |
| M451T270   | 451. 1196033 | 269. 798 | 1682623. 667 |
| M451T227   | 451. 1419845 | 227. 421 | 516348. 9087 |
| M451T416   | 451. 1442436 | 416. 128 | 1005464. 723 |
| M451T217   | 451. 1418795 | 216. 95  | 2055005. 17  |
| M451T279   | 451. 1443044 | 278. 627 | 1090549. 414 |
| M451T323   | 451. 1470923 | 322. 862 | 1486466. 363 |
| M451T264   | 451. 1440683 | 264. 434 | 1036100. 981 |
| M451T738   | 451. 1485298 | 737. 955 | 859809. 5633 |
| M451T480   | 451. 1786177 | 479. 541 | 681512. 858  |
| M451T280   | 451. 1918384 | 279. 68  | 996492. 7783 |
| M451T626_1 | 451. 1877354 | 626. 183 | 1912213. 906 |
| M451T703   | 451. 1964702 | 702. 622 | 907994. 8704 |
| M451T681   | 451. 1964805 | 681. 406 | 1496386. 563 |
| M451T669   | 451. 1967739 | 669. 12  | 2693449. 424 |
| M451T652   | 451. 1964666 | 652. 285 | 5683053. 897 |
| M451T508   | 451. 1940745 | 507. 55  | 5569128. 16  |
| M451T595   | 451. 2078959 | 595. 35  | 463667. 0975 |
| M451T605   | 451. 2078143 | 604. 606 | 285618. 0975 |
| M451T626_2 | 451. 1991024 | 626. 183 | 4699244. 813 |
| M451T415   | 451. 2168601 | 414. 571 | 2458772. 192 |
| M451T458   | 451. 2169459 | 457. 763 | 1818835. 327 |
| M451T831   | 451. 2715313 | 830. 813 | 2530251. 443 |
| M452T79    | 452. 0374478 | 79. 4105 | 10168227. 27 |
| M452T407   | 452. 1137841 | 406. 813 | 1578976. 948 |
| M452T315   | 452. 1363244 | 315. 162 | 1083942. 445 |
| M452T187   | 452. 1387077 | 186. 689 | 6348662. 821 |
| M452T203   | 452. 141411  | 203. 346 | 1990567. 57  |
| M452T91    | 452. 1388644 | 90. 9026 | 12727717. 18 |
| M452T98    | 452. 1389642 | 97. 682  | 14294831. 73 |
| M452T107   | 452. 1388961 | 106. 648 | 6523199. 452 |
| M452T157   | 452. 139083  | 156. 582 | 3137198. 543 |

|            |              |          |              |
|------------|--------------|----------|--------------|
| M452T172   | 452. 1383999 | 171. 546 | 4880083. 153 |
| M452T146   | 452. 138778  | 146. 08  | 894076. 0871 |
| M452T665   | 452. 1503792 | 664. 565 | 2824312. 996 |
| M452T595   | 452. 1527978 | 595. 35  | 4382581. 58  |
| M452T631_1 | 452. 1456728 | 630. 737 | 6384680. 059 |
| M452T614   | 452. 1526123 | 613. 824 | 20912785. 89 |
| M452T738   | 452. 1521813 | 737. 955 | 459467. 0466 |
| M452T450   | 452. 1478981 | 450. 052 | 209832. 4259 |
| M452T575   | 452. 1582239 | 575. 222 | 2718166. 147 |
| M452T631_2 | 452. 1574495 | 630. 737 | 22299390. 2  |
| M452T626   | 452. 1960178 | 626. 183 | 1323587. 339 |
| M452T654   | 452. 1957712 | 653. 835 | 637098. 7694 |
| M452T509   | 452. 1935257 | 509. 11  | 907105. 9125 |
| M452T415   | 452. 2208282 | 414. 571 | 485961. 7234 |
| M453T486   | 452. 7361743 | 485. 784 | 316090. 6124 |
| M453T511   | 453. 0911079 | 510. 673 | 1166738. 706 |
| M453T106   | 453. 1208264 | 105. 537 | 3120733. 001 |
| M453T631   | 453. 154076  | 630. 737 | 4176195. 686 |
| M453T214   | 453. 1513213 | 213. 897 | 266570. 2467 |
| M453T614   | 453. 1552682 | 613. 824 | 4360091. 849 |
| M453T428   | 453. 1616577 | 428. 448 | 776828. 8122 |
| M453T612   | 453. 1667086 | 612. 3   | 1665384. 945 |
| M453T597   | 453. 1712222 | 596. 795 | 252642. 4227 |
| M453T381   | 453. 1983927 | 380. 608 | 384386. 9283 |
| M454T472   | 454. 1326723 | 471. 768 | 880471. 1535 |
| M454T106   | 454. 1528176 | 105. 537 | 4790248. 394 |
| M454T430   | 454. 1534925 | 429. 94  | 1157917. 847 |
| M454T312   | 454. 1539542 | 312. 058 | 872314. 6245 |
| M454T614   | 454. 1613572 | 613. 824 | 526136. 9597 |
| M454T583   | 454. 169964  | 582. 96  | 22807541. 01 |
| M454T267   | 454. 1905983 | 266. 709 | 2337757. 332 |
| M454T273   | 454. 1905843 | 273. 232 | 3286055. 829 |
| M454T290   | 454. 1905805 | 289. 534 | 8644775. 204 |
| M454T303   | 454. 1905416 | 303. 259 | 1426197. 905 |
| M454T425   | 454. 2007135 | 425. 439 | 642259. 3974 |
| M454T444   | 454. 26419   | 443. 961 | 286558. 4506 |
| M455T89    | 455. 0065783 | 88. 8247 | 1277491. 201 |
| M455T574   | 455. 0586223 | 573. 704 | 1400871. 512 |
| M455T102_1 | 455. 0868227 | 101. 563 | 45403094. 45 |
| M455T93    | 455. 0961996 | 92. 9618 | 11453698. 9  |
| M455T102_2 | 455. 1026204 | 101. 563 | 8513709. 428 |
| M455T425   | 455. 1169333 | 425. 439 | 118548. 5266 |
| M455T235   | 455. 1353138 | 234. 972 | 2223688. 841 |
| M455T106   | 455. 1387922 | 105. 537 | 2553403. 311 |
| M455T259   | 455. 1426908 | 259. 134 | 466729. 338  |
| M455T91    | 455. 1474463 | 90. 9026 | 6796428. 112 |
| M455T237   | 455. 1489718 | 236. 518 | 391207. 6816 |
| M455T415   | 455. 1723039 | 414. 571 | 2133295. 262 |
| M455T583   | 455. 1725157 | 582. 96  | 5120017. 708 |
| M455T404_1 | 455. 1715911 | 403. 698 | 1483923. 337 |
| M455T435   | 455. 1905913 | 434. 617 | 280987. 0269 |
| M455T288   | 455. 1928202 | 287. 981 | 1326363. 057 |
| M455T271   | 455. 1927857 | 270. 88  | 913672. 7916 |
| M455T422   | 455. 2046691 | 422. 362 | 519681. 0037 |

|            |              |          |              |
|------------|--------------|----------|--------------|
| M455T404_2 | 455. 20023   | 403. 698 | 668413. 6811 |
| M455T560   | 455. 209112  | 560. 119 | 11077190. 6  |
| M455T535   | 455. 2231277 | 535. 488 | 238849. 6469 |
| M455T813   | 455. 2507876 | 812. 68  | 6258404. 165 |
| M455T835   | 455. 2510161 | 835. 329 | 6550655. 751 |
| M455T729   | 455. 26157   | 728. 711 | 220319. 7341 |
| M456T620   | 455. 6065935 | 619. 986 | 856197. 2277 |
| M456T102   | 456. 0899956 | 101. 563 | 12733027. 97 |
| M456T495   | 456. 1801291 | 495. 125 | 558120. 0939 |
| M456T583   | 456. 1797604 | 582. 96  | 731762. 9127 |
| M456T680   | 456. 1858231 | 679. 873 | 1975166. 218 |
| M456T688   | 456. 1848959 | 688. 189 | 1811931. 602 |
| M456T394   | 456. 1980312 | 394. 467 | 1040557. 924 |
| M456T831   | 456. 2497334 | 830. 813 | 3536523. 166 |
| M456T796   | 456. 2496457 | 796. 202 | 447340. 4735 |
| M457T33_1  | 456. 9723434 | 32. 8715 | 54286. 69986 |
| M457T467   | 457. 1083164 | 467. 127 | 3159168. 677 |
| M457T106   | 457. 1226316 | 105. 537 | 5760720. 894 |
| M457T92    | 457. 1221947 | 91. 9113 | 23117560. 52 |
| M457T203   | 457. 1292021 | 203. 346 | 1497667. 351 |
| M457T415   | 457. 1311919 | 414. 571 | 2601328. 203 |
| M457T152   | 457. 1276212 | 152. 08  | 465337. 8521 |
| M457T296   | 457. 1326    | 295. 704 | 2081602. 091 |
| M457T223   | 457. 1331941 | 222. 943 | 1037284. 975 |
| M457T416   | 457. 1440334 | 416. 128 | 953475. 2683 |
| M457T375   | 457. 1603577 | 374. 746 | 1165779. 957 |
| M457T314_1 | 457. 1580133 | 313. 612 | 2069005. 982 |
| M457T362   | 457. 1605907 | 362. 384 | 1917547. 097 |
| M457T324_1 | 457. 1584331 | 324. 413 | 4120878. 081 |
| M457T433   | 457. 1704762 | 433. 06  | 5280759. 192 |
| M457T535   | 457. 1684121 | 535. 488 | 2158198. 414 |
| M457T453   | 457. 1649255 | 453. 126 | 703976. 9406 |
| M457T184   | 457. 1682078 | 183. 708 | 11161181. 6  |
| M457T422   | 457. 1698717 | 422. 362 | 2649383. 336 |
| M457T508   | 457. 168103  | 507. 55  | 616907. 9386 |
| M457T154   | 457. 1682074 | 153. 601 | 1118470. 743 |
| M457T108   | 457. 1638328 | 108. 082 | 1240396. 793 |
| M457T199   | 457. 1682371 | 198. 821 | 7949138. 825 |
| M457T497   | 457. 1725288 | 496. 646 | 2029609. 629 |
| M457T483   | 457. 17271   | 482. 656 | 1242675. 98  |
| M457T314_2 | 457. 1703846 | 313. 612 | 3492104. 56  |
| M457T324_2 | 457. 1704612 | 324. 413 | 7388646. 085 |
| M457T435_1 | 457. 1821108 | 434. 617 | 1220338. 162 |
| M457T444_1 | 457. 1820894 | 443. 961 | 991780. 4718 |
| M457T435_2 | 457. 1941584 | 434. 617 | 2568478. 468 |
| M457T444_2 | 457. 1939837 | 443. 961 | 2866030. 118 |
| M457T514   | 457. 2044415 | 513. 768 | 997978. 6711 |
| M457T494   | 457. 2054327 | 493. 56  | 902458. 0318 |
| M457T396   | 457. 2030932 | 396. 023 | 216160. 2192 |
| M457T831   | 457. 2374721 | 830. 813 | 985773. 6387 |
| M457T805_1 | 457. 233134  | 805. 145 | 28231673. 65 |
| M457T33_2  | 457. 2308542 | 32. 8715 | 418199. 3472 |
| M457T805_2 | 457. 2445209 | 805. 145 | 12878589. 19 |
| M457T744   | 457. 2818399 | 744. 192 | 402656. 6127 |

|            |              |          |              |
|------------|--------------|----------|--------------|
| M457T761   | 457. 278185  | 760. 976 | 1168304. 102 |
| M457T772   | 457. 277213  | 771. 785 | 452558. 7681 |
| M457T735   | 457. 2772408 | 734. 901 | 231615. 2621 |
| M458T294   | 458. 1152762 | 294. 152 | 1413148. 649 |
| M458T220_1 | 458. 111215  | 219. 979 | 1565228. 189 |
| M458T352   | 458. 1245784 | 351. 663 | 260250. 7235 |
| M458T220_2 | 458. 1257786 | 219. 979 | 589604. 9543 |
| M458T343_1 | 458. 1409322 | 342. 819 | 3933458. 156 |
| M458T568_1 | 458. 1596359 | 567. 543 | 30794286. 76 |
| M458T343_2 | 458. 1548077 | 342. 819 | 6428446. 297 |
| M458T187   | 458. 1670464 | 186. 689 | 1140099. 9   |
| M458T179   | 458. 1663988 | 179. 046 | 700601. 1018 |
| M458T568_2 | 458. 1712443 | 567. 543 | 31792020. 15 |
| M458T199   | 458. 1686073 | 198. 821 | 1110819. 535 |
| M458T522_1 | 458. 182891  | 521. 5   | 11376407     |
| M458T532_1 | 458. 1828865 | 532. 372 | 2328492. 307 |
| M458T476   | 458. 1852622 | 476. 451 | 1783730. 025 |
| M458T467   | 458. 1854272 | 467. 127 | 2628927. 243 |
| M458T522_2 | 458. 1964743 | 521. 5   | 2925540. 478 |
| M458T532_2 | 458. 1965145 | 532. 372 | 655447. 4961 |
| M458T805   | 458. 2385664 | 805. 145 | 7323785. 687 |
| M458T422   | 458. 2653855 | 422. 362 | 594408. 7711 |
| M459T327   | 459. 1213453 | 327. 449 | 492096. 5501 |
| M459T464   | 459. 1240978 | 464. 011 | 2841420. 865 |
| M459T194_1 | 459. 1221231 | 194. 243 | 3083799. 256 |
| M459T408   | 459. 1239897 | 408. 368 | 1819457. 375 |
| M459T452   | 459. 1240618 | 451. 616 | 1738206. 481 |
| M459T387   | 459. 1241852 | 386. 78  | 1107474. 625 |
| M459T428   | 459. 1239338 | 428. 448 | 1323034. 965 |
| M459T283   | 459. 1331546 | 282. 659 | 10678693. 76 |
| M459T104   | 459. 1336642 | 104. 493 | 10870578. 77 |
| M459T252   | 459. 1313939 | 251. 727 | 2579184. 606 |
| M459T194_2 | 459. 133024  | 194. 243 | 11039235. 31 |
| M459T146   | 459. 135775  | 146. 08  | 3244702. 942 |
| M459T413   | 459. 1457465 | 413. 006 | 2170630. 99  |
| M459T194_3 | 459. 1456642 | 194. 243 | 2063569. 176 |
| M459T343   | 459. 1579146 | 342. 819 | 798819. 4872 |
| M459T480   | 459. 1634646 | 479. 541 | 619312. 627  |
| M459T470   | 459. 1628526 | 470. 253 | 782709. 7945 |
| M459T511   | 459. 1727495 | 510. 673 | 331215. 9057 |
| M459T323_1 | 459. 1658285 | 322. 862 | 5325298. 197 |
| M459T483_1 | 459. 176828  | 482. 656 | 1125723. 561 |
| M459T453   | 459. 1844514 | 453. 126 | 4286992. 755 |
| M459T512   | 459. 184567  | 512. 228 | 1759162. 419 |
| M459T427   | 459. 1850234 | 426. 913 | 1557935. 16  |
| M459T323_2 | 459. 1774844 | 322. 862 | 4041053. 265 |
| M459T439   | 459. 1844304 | 439. 27  | 2741029. 929 |
| M459T522   | 459. 1912576 | 521. 5   | 2741328. 192 |
| M459T483_2 | 459. 1908901 | 482. 656 | 2709951. 207 |
| M459T532   | 459. 1908719 | 532. 372 | 604376. 8621 |
| M459T628   | 459. 1889336 | 627. 731 | 429258. 9446 |
| M459T562   | 459. 197276  | 561. 624 | 4960402. 295 |
| M459T782   | 459. 1995181 | 782. 5   | 3006261. 619 |
| M459T498   | 459. 2215776 | 498. 202 | 2349264. 517 |

|            |              |          |              |
|------------|--------------|----------|--------------|
| M459T571   | 459. 2223625 | 570. 599 | 1205715. 923 |
| M459T552   | 459. 2216341 | 552. 493 | 2039494. 356 |
| M459T805   | 459. 2427176 | 805. 145 | 1081124. 127 |
| M460T497   | 459. 7215783 | 496. 646 | 356998. 8168 |
| M460T464   | 460. 1255023 | 464. 011 | 676298. 2428 |
| M460T490   | 460. 1240629 | 490. 434 | 284772. 6646 |
| M460T187_1 | 460. 1261194 | 186. 689 | 16678922. 9  |
| M460T441   | 460. 1400346 | 440. 833 | 636606. 7436 |
| M460T284   | 460. 135707  | 283. 634 | 1478768. 055 |
| M460T187_2 | 460. 140606  | 186. 689 | 3552818. 18  |
| M460T388   | 460. 1428551 | 388. 326 | 1032538. 17  |
| M460T291   | 460. 1549763 | 291. 076 | 669084. 062  |
| M460T350   | 460. 1663177 | 350. 108 | 830140. 7858 |
| M460T358   | 460. 165851  | 357. 746 | 883562. 6262 |
| M460T411   | 460. 1773465 | 411. 444 | 2580029. 263 |
| M460T568   | 460. 1740107 | 567. 543 | 4173741. 421 |
| M460T324   | 460. 1734502 | 324. 413 | 1036533. 299 |
| M460T548   | 460. 1822213 | 547. 805 | 2492381. 508 |
| M460T453   | 460. 1910775 | 453. 126 | 779485. 9711 |
| M460T566   | 460. 1851762 | 566. 042 | 7933341. 238 |
| M460T203   | 460. 2011097 | 203. 346 | 965585. 7023 |
| M460T703   | 460. 2138422 | 702. 622 | 538884. 4573 |
| M460T589   | 460. 217029  | 589. 157 | 1376492. 256 |
| M461T747   | 460. 9228501 | 747. 194 | 548014. 6425 |
| M461T89    | 461. 0172912 | 88. 8247 | 4709608. 003 |
| M461T68    | 461. 0530141 | 67. 6441 | 68581. 96881 |
| M461T317   | 461. 0880476 | 316. 709 | 3114858. 431 |
| M461T346   | 461. 0941438 | 345. 761 | 3689033. 204 |
| M461T288   | 461. 0942997 | 287. 981 | 1942097. 729 |
| M461T297   | 461. 0939964 | 297. 149 | 4187427. 518 |
| M461T387   | 461. 1034322 | 386. 78  | 935605. 8825 |
| M461T391   | 461. 1267006 | 391. 341 | 428130. 6741 |
| M461T187   | 461. 1321963 | 186. 689 | 3040528. 313 |
| M461T361   | 461. 1368215 | 360. 831 | 527428. 5188 |
| M461T283   | 461. 1387192 | 282. 659 | 312542. 3611 |
| M461T347   | 461. 1433636 | 347. 166 | 661272. 5382 |
| M461T102   | 461. 1475612 | 101. 563 | 11813636. 44 |
| M461T95    | 461. 1529575 | 95. 2383 | 13231553. 94 |
| M461T302   | 461. 1508404 | 301. 725 | 567928. 5732 |
| M461T294   | 461. 1506117 | 294. 152 | 1142966. 623 |
| M461T478_1 | 461. 1540595 | 477. 982 | 6966486. 445 |
| M461T388   | 461. 1619325 | 388. 326 | 1424948. 974 |
| M461T381   | 461. 1622327 | 380. 608 | 2889939. 674 |
| M461T478_2 | 461. 1669741 | 477. 982 | 29272852. 32 |
| M461T701_1 | 461. 1748174 | 701. 149 | 12026375. 19 |
| M461T723   | 461. 1786938 | 722. 604 | 2968574. 573 |
| M461T568   | 461. 1819975 | 567. 543 | 1827680. 647 |
| M461T504   | 461. 178726  | 504. 432 | 7097767. 615 |
| M461T411   | 461. 1902685 | 411. 444 | 451857. 389  |
| M461T212   | 461. 1861863 | 212. 366 | 2016022. 849 |
| M461T107   | 461. 1855584 | 106. 648 | 4454372. 365 |
| M461T701_2 | 461. 1857704 | 701. 149 | 5896227. 159 |
| M461T146   | 461. 1858064 | 146. 08  | 4711097. 799 |
| M461T167   | 461. 1920217 | 167. 01  | 4290662. 476 |

|            |              |          |              |
|------------|--------------|----------|--------------|
| M461T188   | 461. 190596  | 188. 174 | 2193686. 341 |
| M461T433   | 461. 2000758 | 433. 06  | 1578918. 266 |
| M461T449   | 461. 1999141 | 448. 527 | 1692266. 591 |
| M461T442   | 461. 2353939 | 442. 399 | 2921783. 31  |
| M461T480   | 461. 2373469 | 479. 541 | 2147301. 952 |
| M461T559   | 461. 2377123 | 558. 574 | 7910399. 8   |
| M461T500   | 461. 2374536 | 499. 759 | 3852788. 345 |
| M461T591   | 461. 2373221 | 590. 717 | 5915726. 332 |
| M461T489   | 461. 2373236 | 488. 885 | 2601568. 188 |
| M461T526   | 461. 2419669 | 526. 124 | 3070089. 741 |
| M462T314   | 462. 0982726 | 313. 612 | 504880. 8115 |
| M462T143   | 462. 107461  | 143. 174 | 945968. 3592 |
| M462T154   | 462. 1073258 | 153. 601 | 1530953. 199 |
| M462T356   | 462. 1277829 | 356. 274 | 438998. 7872 |
| M462T185   | 462. 1335491 | 185. 252 | 340233. 7036 |
| M462T537   | 462. 1475445 | 537. 051 | 3053911. 972 |
| M462T324   | 462. 1565435 | 324. 413 | 507137. 1324 |
| M462T369   | 462. 1583092 | 368. 559 | 527091. 7688 |
| M462T306   | 462. 1715111 | 306. 164 | 4004140. 55  |
| M462T478   | 462. 1693296 | 477. 982 | 6765966. 348 |
| M462T196   | 462. 1706518 | 195. 791 | 1429237. 621 |
| M462T489_1 | 462. 1692819 | 488. 885 | 1274786. 803 |
| M462T220   | 462. 1715358 | 219. 979 | 2579097. 442 |
| M462T211   | 462. 1711716 | 210. 883 | 3234793. 171 |
| M462T701   | 462. 1807105 | 701. 149 | 2032161. 599 |
| M462T559   | 462. 1975295 | 558. 574 | 1166059. 173 |
| M462T704   | 462. 2325444 | 704. 046 | 550998. 7562 |
| M462T439   | 462. 2400713 | 439. 27  | 745030. 1972 |
| M462T401   | 462. 2416711 | 400. 641 | 826913. 2485 |
| M462T489_2 | 462. 2443099 | 488. 885 | 541554. 4284 |
| M462T554   | 462. 2431775 | 554. 027 | 564235. 7186 |
| M462T73    | 462. 4115913 | 73. 3444 | 6586939. 507 |
| M463T508   | 463. 0864959 | 507. 55  | 7553445. 136 |
| M463T293   | 463. 1043968 | 292. 621 | 1017157. 917 |
| M463T331   | 463. 1185907 | 330. 552 | 302363. 7674 |
| M463T404   | 463. 1429354 | 403. 698 | 796077. 2325 |
| M463T539   | 463. 1517235 | 538. 619 | 424263. 5412 |
| M463T706   | 463. 186043  | 705. 593 | 475666. 962  |
| M463T671   | 463. 1973177 | 670. 674 | 999580. 0524 |
| M463T464_1 | 463. 2169894 | 464. 011 | 761495. 4878 |
| M463T597   | 463. 2512393 | 596. 795 | 4053265. 721 |
| M463T478   | 463. 2571716 | 477. 982 | 2057198. 407 |
| M463T464_2 | 463. 2571676 | 464. 011 | 1410466. 146 |
| M463T494   | 463. 2570863 | 493. 56  | 1895678. 736 |
| M463T441   | 463. 2568599 | 440. 833 | 802146. 2869 |
| M463T563   | 463. 254679  | 562. 946 | 2276702. 343 |
| M463T509   | 463. 2571774 | 509. 11  | 807467. 002  |
| M463T829   | 463. 3113707 | 829. 321 | 932757. 4323 |
| M463T814   | 463. 3414195 | 814. 118 | 1835526. 663 |
| M464T68    | 464. 0713317 | 67. 6441 | 749262. 1708 |
| M464T508   | 464. 0873029 | 507. 55  | 1429269. 813 |
| M464T755   | 464. 123151  | 754. 814 | 21616535. 12 |
| M464T819   | 464. 1232465 | 818. 743 | 23815447. 32 |
| M464T778   | 464. 1232297 | 777. 92  | 20578695. 62 |



|            |              |          |              |
|------------|--------------|----------|--------------|
| M464T799   | 464. 1231366 | 799. 306 | 28356508. 23 |
| M464T835   | 464. 1232755 | 835. 329 | 28090866. 32 |
| M464T272   | 464. 1376474 | 272. 312 | 68809. 49506 |
| M464T449   | 464. 143229  | 448. 527 | 4557740. 388 |
| M464T539   | 464. 1457666 | 538. 619 | 794418. 4586 |
| M464T318   | 464. 1869115 | 318. 232 | 240309. 4756 |
| M464T645   | 464. 2458642 | 644. 722 | 901173. 5212 |
| M464T706   | 464. 2464846 | 705. 593 | 1445875. 403 |
| M464T552   | 464. 2512792 | 552. 493 | 407932. 3328 |
| M465T375   | 465. 1323337 | 374. 746 | 578432. 0064 |
| M465T811   | 465. 1302798 | 811. 292 | 39462503. 4  |
| M465T394   | 465. 1321614 | 394. 467 | 966102. 4882 |
| M465T385   | 465. 132556  | 385. 225 | 851074. 307  |
| M465T401   | 465. 160897  | 400. 641 | 317819. 9933 |
| M465T470   | 465. 1739737 | 470. 253 | 155941. 136  |
| M465T767   | 465. 2081741 | 767. 145 | 231976. 8554 |
| M465T796   | 465. 3215468 | 796. 202 | 228811. 0937 |
| M466T283   | 466. 116041  | 282. 659 | 359320. 8413 |
| M466T764   | 466. 1198518 | 764. 034 | 2541370. 695 |
| M466T798   | 466. 1191161 | 797. 757 | 4641063. 553 |
| M466T327   | 466. 1325618 | 327. 449 | 487252. 8321 |
| M466T592   | 466. 1317778 | 592. 284 | 674377. 3722 |
| M466T829   | 466. 1279061 | 829. 321 | 7124205. 237 |
| M466T106   | 466. 1518231 | 105. 537 | 15377623. 92 |
| M466T167   | 466. 155625  | 167. 01  | 1011389. 565 |
| M466T146   | 466. 1556532 | 146. 08  | 2232226. 104 |
| M466T661   | 466. 167025  | 661. 453 | 1373125. 049 |
| M466T686   | 466. 1665913 | 686. 047 | 3845867. 981 |
| M466T671   | 466. 1675825 | 670. 674 | 4167871. 257 |
| M466T700   | 466. 175502  | 699. 592 | 404188. 629  |
| M466T535   | 466. 2313716 | 535. 488 | 622977. 7009 |
| M466T518   | 466. 2432124 | 518. 474 | 1374377. 297 |
| M466T308   | 466. 2526749 | 307. 616 | 25842972. 67 |
| M466T669   | 466. 262032  | 669. 12  | 8670054. 755 |
| M467T518   | 466. 7532364 | 518. 474 | 633312. 4896 |
| M467T335_1 | 467. 1303397 | 335. 153 | 1768583. 641 |
| M467T837   | 467. 1249541 | 836. 769 | 579871. 1572 |
| M467T317_1 | 467. 1297068 | 316. 709 | 19583907. 18 |
| M467T344   | 467. 1301313 | 344. 233 | 835229. 5704 |
| M467T355_1 | 467. 1305475 | 354. 719 | 1167416. 083 |
| M467T106   | 467. 1380019 | 105. 537 | 2841131. 573 |
| M467T362_1 | 467. 1306583 | 362. 384 | 942711. 7816 |
| M467T703_1 | 467. 1400714 | 702. 622 | 7447175. 218 |
| M467T335_2 | 467. 1413884 | 335. 153 | 2960517. 27  |
| M467T317_2 | 467. 1417061 | 316. 709 | 31708611. 41 |
| M467T715   | 467. 1409737 | 714. 841 | 3588865. 971 |
| M467T305   | 467. 1418409 | 304. 743 | 8752958. 216 |
| M467T355_2 | 467. 1415583 | 354. 719 | 2036126. 904 |
| M467T724   | 467. 1526529 | 724. 158 | 2141061. 923 |
| M467T741   | 467. 1512514 | 741. 077 | 739942. 7207 |
| M467T362_2 | 467. 1414107 | 362. 384 | 1561729. 17  |
| M467T762   | 467. 1512748 | 762. 482 | 974357. 1285 |
| M467T703_2 | 467. 1525283 | 702. 622 | 8319252. 658 |
| M467T410   | 467. 1544853 | 409. 881 | 90061. 30748 |

|            |              |          |              |
|------------|--------------|----------|--------------|
| M467T107   | 467. 1571552 | 106. 648 | 2927507. 224 |
| M467T447   | 467. 1632738 | 446. 967 | 1745302. 048 |
| M467T687   | 467. 1777871 | 687. 214 | 731838. 733  |
| M467T580   | 467. 2207861 | 579. 883 | 4356962. 943 |
| M467T308   | 467. 2453408 | 307. 616 | 4558950. 982 |
| M467T669   | 467. 263717  | 669. 12  | 1969673. 251 |
| M468T390   | 468. 0898912 | 389. 839 | 843822. 3715 |
| M468T223   | 468. 1084493 | 222. 943 | 716531. 6271 |
| M468T271   | 468. 1081904 | 270. 88  | 3776616. 108 |
| M468T367   | 468. 1245314 | 367. 026 | 911526. 4214 |
| M468T217   | 468. 1339815 | 216. 95  | 2733377. 033 |
| M468T278   | 468. 1300505 | 278. 267 | 2089959. 383 |
| M468T317   | 468. 1415725 | 316. 709 | 6911487. 088 |
| M468T299   | 468. 1425274 | 298. 619 | 2846799. 304 |
| M468T535   | 468. 1475727 | 535. 488 | 911949. 1913 |
| M468T724   | 468. 1463855 | 724. 158 | 467728. 589  |
| M468T704   | 468. 1477526 | 704. 046 | 2609089. 558 |
| M468T199   | 468. 1478725 | 198. 821 | 513511. 6    |
| M468T557   | 468. 1533849 | 557. 078 | 885669. 69   |
| M468T449   | 468. 1683455 | 448. 527 | 729334. 718  |
| M468T508   | 468. 1790764 | 507. 55  | 842346. 5018 |
| M468T628   | 468. 1811499 | 627. 731 | 2724716. 68  |
| M468T464   | 468. 2191373 | 464. 011 | 430434. 3697 |
| M469T72    | 469. 0798036 | 72. 0941 | 10985883. 91 |
| M469T271   | 469. 1121594 | 270. 519 | 423107. 6714 |
| M469T104   | 469. 1159259 | 104. 493 | 4345918. 154 |
| M469T421_1 | 469. 1225832 | 420. 799 | 2343872. 648 |
| M469T294   | 469. 1313688 | 294. 152 | 825797. 8479 |
| M469T703_1 | 469. 1382065 | 702. 622 | 3647873. 237 |
| M469T723   | 469. 1398869 | 722. 604 | 1435704. 627 |
| M469T421_2 | 469. 1374878 | 420. 799 | 6635583. 877 |
| M469T317   | 469. 1374499 | 316. 709 | 765753. 5287 |
| M469T472   | 469. 1446805 | 471. 768 | 387259. 8562 |
| M469T481   | 469. 1449352 | 481. 089 | 667559. 5822 |
| M469T703_2 | 469. 1488769 | 702. 622 | 2708336. 174 |
| M469T361_1 | 469. 1485765 | 360. 831 | 3175558. 217 |
| M469T683   | 469. 1565031 | 682. 948 | 1484216. 423 |
| M469T361_2 | 469. 1625647 | 360. 831 | 1525090. 19  |
| M469T450   | 469. 1696704 | 450. 052 | 1019907. 171 |
| M469T480_1 | 469. 1785429 | 479. 541 | 1591722. 277 |
| M469T470_1 | 469. 1786495 | 470. 253 | 2283900. 452 |
| M469T401   | 469. 1874622 | 400. 641 | 541876. 7867 |
| M469T628   | 469. 1870892 | 627. 731 | 765937. 2702 |
| M469T461   | 469. 1904058 | 460. 89  | 3390456. 149 |
| M469T480_2 | 469. 1905039 | 479. 541 | 7102905. 269 |
| M469T470_2 | 469. 1905076 | 470. 253 | 10807890. 97 |
| M469T490   | 469. 2217641 | 490. 434 | 666515. 2916 |
| M469T562   | 469. 2316356 | 561. 624 | 27097695. 42 |
| M470T615_1 | 470. 100383  | 615. 38  | 2223073. 366 |
| M470T615_2 | 470. 1136725 | 615. 38  | 2292208. 608 |
| M470T299   | 470. 1136156 | 298. 619 | 279876. 9053 |
| M470T93_1  | 470. 1438234 | 92. 9618 | 936488052. 8 |
| M470T704   | 470. 1437937 | 704. 046 | 670968. 1722 |
| M470T290   | 470. 149586  | 289. 534 | 5163856. 056 |

|            |              |          |              |
|------------|--------------|----------|--------------|
| M470T209   | 470. 1462561 | 209. 472 | 1107701. 352 |
| M470T223   | 470. 1487761 | 222. 943 | 2808466. 598 |
| M470T193   | 470. 1485041 | 192. 769 | 3106190. 523 |
| M470T200   | 470. 1483022 | 200. 362 | 1936836. 655 |
| M470T169   | 470. 1485331 | 168. 507 | 2851764. 341 |
| M470T93_2  | 470. 1559045 | 92. 9618 | 935981024. 2 |
| M470T428   | 470. 1536988 | 428. 448 | 1331572. 358 |
| M470T532   | 470. 163893  | 532. 372 | 1120211. 312 |
| M470T480   | 470. 1920386 | 479. 541 | 1347241. 142 |
| M470T470   | 470. 1970804 | 470. 253 | 2027903. 676 |
| M470T461   | 470. 1970256 | 460. 89  | 534644. 4453 |
| M471T112_1 | 471. 0623716 | 112. 287 | 5142641. 381 |
| M471T103   | 471. 0709331 | 102. 948 | 11312288. 99 |
| M471T93_1  | 471. 0714543 | 92. 9618 | 27585381. 61 |
| M471T615   | 471. 1083653 | 615. 38  | 957907. 5787 |
| M471T98    | 471. 1340788 | 97. 682  | 143692993. 4 |
| M471T112_2 | 471. 1339505 | 112. 287 | 12187368     |
| M471T288   | 471. 1432334 | 287. 981 | 727021. 0092 |
| M471T93_2  | 471. 1462199 | 92. 9618 | 161720860. 2 |
| M471T430   | 471. 1502264 | 429. 94  | 191750. 606  |
| M471T683   | 471. 155225  | 682. 948 | 422279. 7301 |
| M471T327   | 471. 1674896 | 327. 449 | 777364. 2322 |
| M471T442   | 471. 1691727 | 442. 399 | 607019. 6672 |
| M471T344   | 471. 1678992 | 344. 233 | 810061. 6359 |
| M471T515   | 471. 190511  | 515. 338 | 460140. 681  |
| M471T503_1 | 471. 1903568 | 502. 873 | 1258292. 887 |
| M471T415   | 471. 2042934 | 414. 571 | 2865611. 218 |
| M471T503_2 | 471. 2115753 | 502. 873 | 63583963. 58 |
| M472T291   | 472. 1479895 | 291. 076 | 1739354. 377 |
| M472T98    | 472. 142181  | 97. 682  | 19094735. 56 |
| M472T188   | 472. 1493165 | 188. 174 | 1516116. 546 |
| M472T231   | 472. 1536844 | 230. 507 | 451670. 2581 |
| M472T415   | 472. 1623289 | 414. 571 | 659040. 0252 |
| M472T603   | 472. 1652185 | 603. 04  | 947515. 8259 |
| M472T577   | 472. 1820086 | 576. 787 | 226612. 3388 |
| M472T560   | 472. 1988281 | 560. 119 | 8870702. 961 |
| M472T503_1 | 472. 2075142 | 502. 873 | 15626286. 66 |
| M472T503_2 | 472. 220586  | 502. 873 | 2204968. 345 |
| M472T834   | 472. 2367978 | 833. 866 | 2524779. 01  |
| M472T819   | 472. 2427161 | 818. 743 | 1535401. 017 |
| M473T410   | 473. 105383  | 409. 881 | 172089. 533  |
| M473T293   | 473. 1110745 | 292. 621 | 589608. 099  |
| M473T98    | 473. 1376439 | 97. 682  | 1854166. 252 |
| M473T157   | 473. 1493443 | 156. 582 | 942826. 6091 |
| M473T146   | 473. 1492286 | 146. 08  | 1833137. 863 |
| M473T191   | 473. 1523518 | 191. 259 | 750818. 2465 |
| M473T170   | 473. 1493131 | 170. 049 | 976864. 4867 |
| M473T515   | 473. 1664574 | 515. 338 | 421419. 7565 |
| M473T344   | 473. 1849122 | 344. 233 | 1794383. 409 |
| M473T332   | 473. 1847274 | 332. 105 | 2758354. 612 |
| M473T467   | 473. 1973704 | 467. 127 | 1099721. 233 |
| M473T535   | 473. 2005339 | 535. 488 | 666595. 3051 |
| M473T416   | 473. 2066554 | 416. 128 | 540852. 3358 |
| M473T503   | 473. 2165339 | 502. 873 | 2583991. 387 |

|            |              |          |              |
|------------|--------------|----------|--------------|
| M473T522   | 473. 2361637 | 521. 5   | 612931. 8604 |
| M473T509   | 473. 2359095 | 509. 11  | 2119752. 055 |
| M473T33_1  | 473. 275364  | 32. 8715 | 906246. 1448 |
| M473T33_2  | 473. 2873232 | 32. 8715 | 805405. 944  |
| M474T391   | 474. 1052841 | 391. 341 | 818101. 4996 |
| M474T433   | 474. 1651278 | 433. 06  | 1327722. 003 |
| M474T263   | 474. 1701791 | 263. 129 | 635086. 3078 |
| M474T444   | 474. 1863325 | 443. 961 | 1079572. 525 |
| M474T514   | 474. 1953156 | 513. 768 | 962245. 0978 |
| M475T31    | 474. 874278  | 31. 4228 | 225912. 8515 |
| M475T589_1 | 475. 1174439 | 589. 157 | 925763. 4334 |
| M475T402   | 475. 1167258 | 402. 144 | 1170395. 655 |
| M475T589_2 | 475. 1296838 | 589. 157 | 792083. 45   |
| M475T166   | 475. 140817  | 165. 522 | 1423702. 24  |
| M475T182   | 475. 1408596 | 182. 156 | 2895573. 214 |
| M475T152   | 475. 1408209 | 152. 08  | 556255. 2536 |
| M475T358   | 475. 1481917 | 357. 746 | 3163538. 149 |
| M475T396_1 | 475. 1568048 | 396. 023 | 554676. 9123 |
| M475T494   | 475. 1789495 | 493. 56  | 11147898. 14 |
| M475T404   | 475. 1800747 | 403. 698 | 1502413. 462 |
| M475T387   | 475. 1795741 | 386. 78  | 3507651. 238 |
| M475T746_1 | 475. 1863629 | 745. 747 | 25712679. 15 |
| M475T766   | 475. 2001895 | 765. 588 | 3380170. 571 |
| M475T778   | 475. 200221  | 777. 92  | 1461194. 921 |
| M475T456_1 | 475. 2060064 | 456. 2   | 8402759. 663 |
| M475T746_2 | 475. 1998711 | 745. 747 | 49342416. 24 |
| M475T467_1 | 475. 2060163 | 467. 127 | 1557452. 657 |
| M475T456_2 | 475. 2170542 | 456. 2   | 29428146. 76 |
| M475T396_2 | 475. 2220719 | 396. 023 | 654823. 5944 |
| M475T467_2 | 475. 2170705 | 467. 127 | 5661434. 294 |
| M475T486   | 475. 2173014 | 485. 784 | 1514686. 479 |
| M475T428   | 475. 2169547 | 428. 448 | 2631611. 189 |
| M475T444   | 475. 2280139 | 443. 961 | 843451. 3177 |
| M475T484   | 475. 2514558 | 484. 221 | 2476914. 529 |
| M476T701_1 | 476. 1099388 | 701. 149 | 2707297. 374 |
| M476T283_1 | 476. 1223307 | 282. 659 | 23412736. 44 |
| M476T194   | 476. 1198476 | 194. 243 | 24659504. 65 |
| M476T220   | 476. 1225771 | 219. 979 | 3096174. 731 |
| M476T691   | 476. 122307  | 691. 303 | 2188655. 101 |
| M476T701_2 | 476. 1222495 | 701. 149 | 5272889. 827 |
| M476T446   | 476. 128775  | 445. 522 | 218910. 5241 |
| M476T283_2 | 476. 1346463 | 282. 659 | 5472745. 997 |
| M476T362   | 476. 1371325 | 362. 384 | 848930. 4875 |
| M476T196   | 476. 1380635 | 195. 791 | 1690618. 933 |
| M476T324   | 476. 1579049 | 324. 413 | 1793274. 489 |
| M476T514   | 476. 1716413 | 513. 768 | 609220. 9919 |
| M476T453   | 476. 1794556 | 453. 126 | 1857476. 117 |
| M476T387   | 476. 1879251 | 386. 78  | 763043. 1596 |
| M476T744   | 476. 1973856 | 744. 192 | 14114214. 94 |
| M476T746   | 476. 209012  | 745. 747 | 4389080. 752 |
| M476T456   | 476. 2171677 | 456. 2   | 5721075. 417 |
| M476T552   | 476. 2183705 | 552. 493 | 2161627. 322 |
| M476T484   | 476. 2552751 | 484. 221 | 477355. 427  |
| M476T439   | 476. 2635761 | 439. 27  | 265357. 6011 |

|            |              |          |              |
|------------|--------------|----------|--------------|
| M477T537_1 | 477. 0967355 | 537. 051 | 3762786. 299 |
| M477T537_2 | 477. 1084478 | 537. 051 | 3001056. 967 |
| M477T283   | 477. 1263248 | 282. 659 | 3772156. 402 |
| M477T388   | 477. 1206602 | 388. 326 | 5901783. 9   |
| M477T361   | 477. 1206777 | 360. 831 | 1997314. 026 |
| M477T200   | 477. 1250206 | 200. 362 | 3896475. 511 |
| M477T343   | 477. 1261814 | 342. 819 | 6499103. 257 |
| M477T253   | 477. 1309129 | 252. 703 | 390740. 2285 |
| M477T391   | 477. 1334784 | 391. 341 | 4193154. 679 |
| M477T518   | 477. 1364432 | 518. 474 | 1085116. 804 |
| M477T418_1 | 477. 1536462 | 417. 689 | 4437977. 018 |
| M477T428_1 | 477. 1538247 | 428. 448 | 4772997. 118 |
| M477T418_2 | 477. 1660021 | 417. 689 | 4769025. 529 |
| M477T428_2 | 477. 1660616 | 428. 448 | 4773405. 69  |
| M477T453   | 477. 1796653 | 453. 126 | 437256. 0309 |
| M477T378   | 477. 1933976 | 377. 64  | 3616003. 593 |
| M477T399   | 477. 2014699 | 399. 086 | 1814389. 637 |
| M477T746   | 477. 1959583 | 745. 747 | 1920585. 572 |
| M477T444   | 477. 2355192 | 443. 961 | 2103287. 068 |
| M477T462   | 477. 2355123 | 462. 446 | 984589. 3483 |
| M477T526   | 477. 2354117 | 526. 124 | 1084498. 733 |
| M478T537   | 478. 1018897 | 537. 051 | 952559. 0677 |
| M478T283   | 478. 1297778 | 282. 659 | 671783. 2993 |
| M478T196   | 478. 1275692 | 195. 791 | 810498. 4084 |
| M478T540   | 478. 1449522 | 540. 152 | 522365. 4543 |
| M478T478   | 478. 1535274 | 477. 982 | 6275874. 803 |
| M478T487   | 478. 1536747 | 487. 329 | 2910187. 519 |
| M478T338   | 478. 1530006 | 338. 222 | 1754184. 387 |
| M478T364   | 478. 1525945 | 363. 928 | 1747528. 994 |
| M478T418   | 478. 1585319 | 417. 689 | 1262534. 265 |
| M478T428   | 478. 1587986 | 428. 448 | 910125. 4467 |
| M478T738_1 | 478. 1636415 | 737. 955 | 2910529. 565 |
| M478T738_2 | 478. 174798  | 737. 955 | 3407957. 073 |
| M478T746   | 478. 2044848 | 745. 747 | 406236. 9513 |
| M478T559   | 478. 228166  | 558. 574 | 2300279. 98  |
| M478T546   | 478. 2281348 | 546. 308 | 2807830. 877 |
| M478T591   | 478. 2281239 | 590. 717 | 5305929. 382 |
| M478T415   | 478. 2391337 | 414. 571 | 310369. 1584 |
| M479T407_1 | 479. 1224762 | 406. 813 | 741665. 3973 |
| M479T350   | 479. 1353685 | 350. 108 | 728005. 2751 |
| M479T478   | 479. 1521494 | 477. 982 | 921896. 5022 |
| M479T487   | 479. 1526138 | 487. 329 | 562897. 1332 |
| M479T297   | 479. 1586839 | 297. 149 | 1629169. 898 |
| M479T320   | 479. 160218  | 319. 785 | 4277974. 638 |
| M479T203   | 479. 1607873 | 203. 346 | 1484540. 816 |
| M479T738   | 479. 1783481 | 737. 955 | 734151. 0912 |
| M479T99    | 479. 1968438 | 98. 9649 | 31724235. 12 |
| M479T112   | 479. 1966358 | 112. 287 | 4638988. 644 |
| M479T407_2 | 479. 2087058 | 406. 813 | 583491. 2318 |
| M479T490_1 | 479. 2351558 | 490. 434 | 720845. 0657 |
| M479T472   | 479. 2463462 | 471. 768 | 2502598. 373 |
| M479T453   | 479. 2462838 | 453. 126 | 959078. 9394 |
| M479T520   | 479. 2463805 | 519. 998 | 7019503. 892 |
| M479T490_2 | 479. 2465121 | 490. 434 | 4591085. 468 |

|            |             |         |             |
|------------|-------------|---------|-------------|
| M480T69    | 480.0895361 | 69.1983 | 210934.7358 |
| M480T100   | 480.1311531 | 100.283 | 19659701.6  |
| M480T391   | 480.1317862 | 391.341 | 583076.9763 |
| M480T407   | 480.1384063 | 406.813 | 525294.1778 |
| M480T661   | 480.1556018 | 661.453 | 579784.6488 |
| M480T106   | 480.1858477 | 105.537 | 4649131.484 |
| M480T591   | 480.2458229 | 590.717 | 2461148.247 |
| M480T492   | 480.2445268 | 491.99  | 589818.7481 |
| M480T564   | 480.2455963 | 564.487 | 958426.389  |
| M480T787   | 480.3073725 | 787.078 | 5779499.616 |
| M480T823   | 480.3079099 | 823.375 | 38649288.69 |
| M481T68    | 481.0880632 | 67.6441 | 287060.8336 |
| M481T391   | 481.1538323 | 391.341 | 586210.5462 |
| M481T632   | 481.2266899 | 632.288 | 151398.5016 |
| M481T823   | 481.3078757 | 823.375 | 8875897.12  |
| M482T778   | 482.0473022 | 777.92  | 889144.8867 |
| M482T814   | 482.0422936 | 814.118 | 821698.7801 |
| M482T68    | 482.0822985 | 67.6441 | 111015.7148 |
| M482T379   | 482.1225274 | 379.066 | 645325.1038 |
| M482T615   | 482.1666034 | 615.38  | 1769825.442 |
| M482T629   | 482.1630748 | 629.272 | 1046332.126 |
| M482T537   | 482.2229908 | 537.051 | 350281.0064 |
| M482T526   | 482.2222675 | 526.124 | 721301.9763 |
| M482T566   | 482.2419401 | 566.042 | 965711.1719 |
| M482T419   | 482.3037306 | 419.237 | 2549281.094 |
| M483T789_1 | 482.926931  | 788.604 | 11673525.18 |
| M483T789_2 | 482.9407424 | 788.604 | 1391275.117 |
| M483T106_1 | 483.1318353 | 105.537 | 10340488.61 |
| M483T378   | 483.1306532 | 377.64  | 201982.9161 |
| M483T503   | 483.1463877 | 502.873 | 385724.5284 |
| M483T106_2 | 483.1517397 | 105.537 | 1136838.505 |
| M483T430   | 483.2039017 | 429.94  | 520490.8056 |
| M483T439   | 483.2109565 | 439.27  | 638837.0833 |
| M484T789   | 483.9340533 | 788.604 | 598596.7365 |
| M484T337   | 484.119268  | 336.681 | 4118572.419 |
| M484T106_1 | 484.1401893 | 105.537 | 1444773.205 |
| M484T418   | 484.1623459 | 417.689 | 1605341.707 |
| M484T106_2 | 484.1633831 | 105.537 | 30516908.74 |
| M484T209   | 484.1685419 | 209.472 | 480242.4886 |
| M484T450   | 484.1981615 | 450.052 | 585474.7237 |
| M485T789   | 484.9220203 | 788.604 | 3155594.171 |
| M485T106_1 | 485.146382  | 105.537 | 26141130.53 |
| M485T341   | 485.1476271 | 341.266 | 1860925.287 |
| M485T146_1 | 485.1461806 | 146.08  | 9707070.87  |
| M485T106_2 | 485.1612498 | 105.537 | 16306045.46 |
| M485T146_2 | 485.1605702 | 146.08  | 4177192.539 |
| M485T361   | 485.1823514 | 360.831 | 697751.236  |
| M485T394   | 485.1822991 | 394.467 | 1578409.575 |
| M485T543   | 485.2127909 | 543.216 | 893921.2527 |
| M485T425_1 | 485.2123031 | 425.439 | 2839143.82  |
| M485T526   | 485.219871  | 526.124 | 2062301.423 |
| M485T546   | 485.224925  | 546.308 | 1314642.307 |
| M485T425_2 | 485.2275041 | 425.439 | 8094539.438 |
| M485T611   | 485.2363023 | 610.742 | 13127677.7  |

|            |              |          |              |
|------------|--------------|----------|--------------|
| M485T716   | 485. 2410888 | 716. 391 | 557273. 3861 |
| M485T724   | 485. 2708875 | 724. 158 | 285913. 9229 |
| M486T294   | 486. 1434128 | 294. 152 | 139324. 6662 |
| M486T106_1 | 486. 1512842 | 105. 537 | 5137928. 892 |
| M486T106_2 | 486. 1791173 | 105. 537 | 4460029. 698 |
| M486T480   | 486. 1805442 | 479. 541 | 2941122. 934 |
| M486T470   | 486. 180644  | 470. 253 | 4306787. 459 |
| M487T95_1  | 487. 1197713 | 95. 2383 | 196198308    |
| M487T184   | 487. 1375129 | 183. 708 | 1864117. 993 |
| M487T221   | 487. 1366359 | 221. 453 | 1680706. 977 |
| M487T172   | 487. 1363315 | 171. 546 | 1228972. 618 |
| M487T240   | 487. 1377105 | 239. 574 | 1033206. 884 |
| M487T286   | 487. 1398091 | 286. 433 | 1430086. 385 |
| M487T95_2  | 487. 1338488 | 95. 2383 | 308145410. 7 |
| M487T199   | 487. 1379058 | 198. 821 | 3335483. 786 |
| M487T428   | 487. 1352513 | 428. 448 | 1898635. 073 |
| M487T430   | 487. 149043  | 429. 94  | 5075158. 699 |
| M487T103   | 487. 16297   | 102. 948 | 5535644. 513 |
| M487T520   | 487. 1764068 | 519. 998 | 572529. 2331 |
| M487T367   | 487. 1999033 | 367. 026 | 1086077. 683 |
| M487T552   | 487. 257378  | 552. 493 | 523206. 7489 |
| M487T545   | 487. 2880326 | 544. 759 | 538852. 2362 |
| M488T215   | 488. 0771605 | 215. 4   | 377292. 954  |
| M488T184   | 488. 1161567 | 183. 708 | 12921467. 7  |
| M488T296   | 488. 1206176 | 295. 704 | 1155673. 67  |
| M488T160   | 488. 116359  | 159. 635 | 2458778. 665 |
| M488T231   | 488. 1257889 | 230. 507 | 471804. 1803 |
| M488T95    | 488. 1270213 | 95. 2383 | 60199166. 24 |
| M488T428   | 488. 14393   | 428. 448 | 555541. 4627 |
| M488T430   | 488. 1551173 | 429. 94  | 879491. 6486 |
| M488T634   | 488. 1744498 | 633. 832 | 760259. 6491 |
| M488T343   | 488. 1768478 | 342. 819 | 3600293. 197 |
| M488T415   | 488. 1929255 | 414. 571 | 1374637. 775 |
| M488T504_1 | 488. 1922373 | 504. 432 | 21785852. 8  |
| M488T504_2 | 488. 2037458 | 504. 432 | 19627852. 59 |
| M488T675   | 488. 2377788 | 675. 322 | 581300. 9861 |
| M488T483_1 | 488. 2459886 | 482. 656 | 2377727. 142 |
| M488T483_2 | 488. 258348  | 482. 656 | 593062. 616  |
| M488T537   | 488. 2996922 | 537. 051 | 8706307. 65  |
| M488T523   | 488. 2997398 | 523. 055 | 1021361. 764 |
| M489T546_1 | 488. 7602038 | 546. 308 | 1943277. 526 |
| M489T76    | 488. 864413  | 76. 0763 | 14398350. 02 |
| M489T102_1 | 489. 1398665 | 101. 563 | 93435218. 31 |
| M489T102_2 | 489. 1511855 | 101. 563 | 79472239. 55 |
| M489T432   | 489. 1603709 | 431. 507 | 3033029. 012 |
| M489T439   | 489. 1601643 | 439. 27  | 918890. 405  |
| M489T537_1 | 489. 1669378 | 537. 051 | 25070550. 46 |
| M489T552   | 489. 1668329 | 552. 493 | 3568947. 995 |
| M489T102_3 | 489. 1810212 | 101. 563 | 4239718. 333 |
| M489T343   | 489. 1809704 | 342. 819 | 810460. 6145 |
| M489T413   | 489. 2018147 | 413. 006 | 676434. 6373 |
| M489T504   | 489. 1998398 | 504. 432 | 6159157. 036 |
| M489T575   | 489. 2104952 | 575. 222 | 107787. 54   |
| M489T483   | 489. 2579893 | 482. 656 | 565746. 1409 |

|            |              |          |              |
|------------|--------------|----------|--------------|
| M489T546_2 | 489. 2684747 | 546. 308 | 2242993. 486 |
| M489T736   | 489. 2810768 | 736. 458 | 686669. 0251 |
| M489T537_2 | 489. 298498  | 537. 051 | 1980567. 212 |
| M489T537_3 | 489. 309374  | 537. 051 | 1627456. 333 |
| M490T187   | 490. 1122888 | 186. 689 | 2138192. 395 |
| M490T161   | 490. 1122708 | 161. 184 | 349871. 3605 |
| M490T199   | 490. 1122641 | 198. 821 | 395615. 9892 |
| M490T331   | 490. 1393982 | 330. 552 | 1497024. 727 |
| M490T157   | 490. 1390462 | 156. 582 | 1336388. 67  |
| M490T170   | 490. 1392901 | 170. 049 | 1077685. 882 |
| M490T537   | 490. 1696139 | 537. 051 | 4081574. 408 |
| M490T344   | 490. 1727727 | 344. 233 | 329442. 9828 |
| M490T365   | 490. 1937555 | 365. 475 | 230707. 687  |
| M490T631_1 | 490. 2036242 | 630. 737 | 1039424. 701 |
| M490T776   | 490. 2197359 | 776. 391 | 459206. 6772 |
| M490T631_2 | 490. 2141922 | 630. 737 | 720194. 8006 |
| M490T334   | 490. 2255489 | 333. 655 | 718355. 8032 |
| M490T601   | 490. 239763  | 601. 473 | 8150682. 265 |
| M490T384   | 490. 2538221 | 383. 727 | 844900. 3374 |
| M491T713   | 491. 1159159 | 713. 292 | 8060883. 978 |
| M491T467   | 491. 139154  | 467. 127 | 241775. 4188 |
| M491T169   | 491. 1417116 | 168. 507 | 939273. 8238 |
| M491T537   | 491. 1723554 | 537. 051 | 683168. 7098 |
| M491T391   | 491. 1708864 | 391. 341 | 784471. 6958 |
| M491T462   | 491. 1778608 | 462. 446 | 2038104. 47  |
| M491T704_1 | 491. 1865575 | 704. 046 | 7329534. 761 |
| M491T697   | 491. 1882185 | 697. 061 | 10047367. 34 |
| M491T704_2 | 491. 1987195 | 704. 046 | 4638589. 421 |
| M491T398   | 491. 2090552 | 397. 585 | 2566944. 597 |
| M491T598   | 491. 2085139 | 598. 341 | 996897. 6683 |
| M491T362   | 491. 2114922 | 362. 384 | 2441225. 552 |
| M491T580   | 491. 2155672 | 579. 883 | 1971026. 551 |
| M491T583   | 491. 2827006 | 582. 96  | 3199212. 408 |
| M491T564   | 491. 2834283 | 564. 487 | 6834273. 595 |
| M491T811   | 491. 3418613 | 811. 292 | 762206. 6235 |
| M491T835_1 | 491. 3418618 | 835. 329 | 1520841. 973 |
| M491T802   | 491. 3544916 | 802. 116 | 3831860. 071 |
| M491T825   | 491. 3570621 | 824. 864 | 5533885. 128 |
| M491T835_2 | 491. 3570445 | 835. 329 | 7689818. 018 |
| M492T589   | 492. 109414  | 589. 157 | 1048798. 712 |
| M492T723   | 492. 1472728 | 722. 604 | 229346. 0109 |
| M492T404   | 492. 169228  | 403. 698 | 496381. 8394 |
| M492T387   | 492. 170819  | 386. 78  | 1283313. 729 |
| M492T391   | 492. 1822781 | 391. 341 | 492240. 144  |
| M492T704   | 492. 1911996 | 704. 046 | 2111805. 831 |
| M492T697   | 492. 1912564 | 697. 061 | 2729665. 461 |
| M492T721   | 492. 1912768 | 721. 058 | 427108. 8741 |
| M492T370   | 492. 2083773 | 370. 115 | 1620054. 339 |
| M492T564   | 492. 2094795 | 564. 487 | 4339247. 036 |
| M492T427   | 492. 2510173 | 426. 913 | 597764. 168  |
| M492T416   | 492. 2591562 | 416. 128 | 808704. 0443 |
| M492T569   | 492. 2872084 | 569. 091 | 1468694. 198 |
| M492T835   | 492. 3588105 | 835. 329 | 2616062. 732 |
| M493T713   | 493. 12214   | 713. 292 | 277858. 0102 |



|            |              |           |              |
|------------|--------------|-----------|--------------|
| M493T439   | 493. 142984  | 439. 27   | 360477. 6463 |
| M493T410   | 493. 1504341 | 409. 881  | 455128. 093  |
| M493T600   | 493. 228588  | 599. 904  | 29943819. 35 |
| M493T415   | 493. 2257476 | 414. 571  | 2334582. 301 |
| M493T588   | 493. 228595  | 587. 595  | 2044821. 546 |
| M493T492   | 493. 2256431 | 491. 99   | 1283066. 75  |
| M493T629   | 493. 2323452 | 629. 272  | 4435340. 397 |
| M494T355   | 494. 1130272 | 354. 719  | 1327871. 161 |
| M494T370_1 | 494. 1103517 | 370. 115  | 1360039. 008 |
| M494T320   | 494. 1115536 | 319. 785  | 655225. 4906 |
| M494T387   | 494. 1102432 | 386. 78   | 1549075. 201 |
| M494T343   | 494. 1119778 | 342. 819  | 2315429. 653 |
| M494T370_2 | 494. 1217227 | 370. 115  | 845176. 8104 |
| M494T657   | 494. 127084  | 656. 84   | 301525. 369  |
| M494T317   | 494. 1496128 | 316. 709  | 1763560. 464 |
| M494T338   | 494. 1493341 | 338. 222  | 1293721. 797 |
| M494T418_1 | 494. 1467843 | 417. 689  | 1288856. 998 |
| M494T428_1 | 494. 1467429 | 428. 448  | 2359957. 427 |
| M494T703   | 494. 156968  | 702. 622  | 40245933. 55 |
| M494T736   | 494. 1572055 | 736. 458  | 6633062. 971 |
| M494T720   | 494. 1574176 | 719. 505  | 18134790. 51 |
| M494T476   | 494. 1637482 | 476. 451  | 2863198. 831 |
| M494T752   | 494. 1673809 | 751. 766  | 3920125. 042 |
| M494T486   | 494. 1636071 | 485. 784  | 1702664. 091 |
| M494T418_2 | 494. 158013  | 417. 689  | 773018. 2134 |
| M494T428_2 | 494. 1583131 | 428. 448  | 1372218. 274 |
| M494T704   | 494. 1676243 | 704. 046  | 60706379. 86 |
| M494T738   | 494. 1722183 | 737. 955  | 5614431. 715 |
| M494T718   | 494. 1732309 | 717. 942  | 15967800. 26 |
| M494T376   | 494. 1806073 | 376. 15   | 1476541. 825 |
| M494T600   | 494. 2262697 | 599. 904  | 6798615. 324 |
| M494T557   | 494. 2209785 | 557. 078  | 602432. 0467 |
| M494T503   | 494. 2207289 | 502. 873  | 1892666. 832 |
| M495T350   | 495. 1329244 | 350. 108  | 4422790. 899 |
| M495T341   | 495. 1362991 | 341. 266  | 2091276. 669 |
| M495T294   | 495. 1418011 | 294. 152  | 1069174. 254 |
| M495T327   | 495. 144709  | 327. 449  | 567196. 4965 |
| M495T367   | 495. 1448774 | 367. 026  | 1890843. 366 |
| M495T419   | 495. 1493486 | 419. 237  | 1685197. 018 |
| M495T352   | 495. 1447366 | 351. 663  | 1348620. 58  |
| M495T428   | 495. 1497103 | 428. 448  | 642875. 6916 |
| M495T703   | 495. 16114   | 702. 622  | 11870766. 66 |
| M495T372   | 495. 1598375 | 371. 633  | 862955. 9089 |
| M495T718   | 495. 1626445 | 717. 942  | 3691811. 585 |
| M495T480   | 495. 1705183 | 479. 541  | 782656. 5465 |
| M495T704   | 495. 1738469 | 704. 046  | 13099848. 25 |
| M495T277   | 495. 1822494 | 276. 7105 | 346588. 2318 |
| M495T405   | 495. 2477512 | 405. 254  | 636998. 094  |
| M495T475   | 495. 2514136 | 474. 888  | 427976. 4593 |
| M496T350   | 496. 1348897 | 350. 108  | 1027255. 449 |
| M496T349   | 496. 1470762 | 348. 668  | 533304. 631  |
| M496T182   | 496. 1636802 | 182. 156  | 2575981. 901 |
| M496T158   | 496. 1638095 | 158. 1    | 1189144. 952 |
| M496T294   | 496. 1694349 | 294. 152  | 2023024. 548 |

|            |              |          |              |
|------------|--------------|----------|--------------|
| M496T704   | 496. 1725635 | 704. 046 | 3243392. 533 |
| M496T718   | 496. 1754309 | 717. 942 | 882152. 8889 |
| M496T95    | 496. 1728657 | 95. 2383 | 11161055. 5  |
| M496T668   | 496. 1808799 | 667. 612 | 3455885. 847 |
| M496T683_1 | 496. 1809886 | 682. 948 | 9946528. 644 |
| M496T683_2 | 496. 1940211 | 682. 948 | 2176802. 642 |
| M496T522   | 496. 2358611 | 521. 5   | 3037920. 195 |
| M496T472   | 496. 235809  | 471. 768 | 1728869. 146 |
| M496T592_1 | 496. 2345789 | 592. 284 | 1886733. 545 |
| M496T532   | 496. 2359863 | 532. 372 | 2947900. 912 |
| M496T492   | 496. 2358116 | 491. 99  | 2546198. 273 |
| M496T592_2 | 496. 2463601 | 592. 284 | 2327757. 223 |
| M497T31    | 496. 9796498 | 31. 4228 | 199733. 435  |
| M497T826   | 497. 0702701 | 826. 333 | 2004694. 018 |
| M497T805   | 497. 0703054 | 805. 145 | 5047479. 355 |
| M497T779   | 497. 0698679 | 779. 407 | 1806389. 237 |
| M497T835   | 497. 0705199 | 835. 329 | 2810274. 038 |
| M497T766   | 497. 075586  | 765. 588 | 903755. 4491 |
| M497T82    | 497. 1134315 | 81. 8855 | 5880117. 347 |
| M497T291_1 | 497. 1227741 | 291. 076 | 1531763. 231 |
| M497T391   | 497. 1215112 | 391. 341 | 481325. 8104 |
| M497T217   | 497. 1215094 | 216. 95  | 249446. 0213 |
| M497T382   | 497. 1351525 | 382. 171 | 281702. 3228 |
| M497T291_2 | 497. 1675979 | 291. 076 | 25694178. 47 |
| M497T291_3 | 497. 1781098 | 291. 076 | 22503810     |
| M497T119   | 497. 2056909 | 119. 413 | 3168475. 03  |
| M497T99    | 497. 2069444 | 98. 9649 | 10660857. 62 |
| M497T522   | 497. 2381627 | 521. 5   | 695725. 0615 |
| M497T514   | 497. 242226  | 513. 768 | 735600. 1729 |
| M497T601   | 497. 2503511 | 601. 473 | 8854520. 544 |
| M497T466   | 497. 2616353 | 465. 575 | 342012. 5212 |
| M498T601   | 497. 7515395 | 601. 473 | 5414393. 869 |
| M498T834   | 498. 0704091 | 833. 866 | 904011. 0181 |
| M498T173   | 498. 1429764 | 173. 092 | 1622175. 603 |
| M498T249   | 498. 1492476 | 249. 466 | 1505759. 331 |
| M498T378   | 498. 1495411 | 377. 64  | 866986. 5326 |
| M498T291   | 498. 1725819 | 291. 076 | 5499797. 137 |
| M498T683   | 498. 1833143 | 682. 948 | 230916. 7414 |
| M498T206   | 498. 1927573 | 206. 399 | 1775171. 89  |
| M498T215   | 498. 1928283 | 215. 4   | 1709504. 699 |
| M498T286   | 498. 1925998 | 286. 433 | 1125978. 64  |
| M498T464   | 498. 2476144 | 464. 011 | 279935. 3371 |
| M499T119   | 499. 0574551 | 119. 413 | 2581611. 145 |
| M499T834   | 499. 0734979 | 833. 866 | 2790492. 554 |
| M499T68    | 499. 0878889 | 67. 6441 | 634841. 365  |
| M499T290   | 499. 1739604 | 289. 534 | 885974. 1367 |
| M499T525_1 | 499. 1919306 | 524. 56  | 623357. 2534 |
| M499T517   | 499. 2149409 | 516. 908 | 986163. 0162 |
| M499T525_2 | 499. 2148274 | 524. 56  | 827940. 476  |
| M499T727   | 499. 3219925 | 727. 22  | 464806. 0138 |
| M500T720   | 500. 0529717 | 719. 505 | 983048. 2932 |
| M500T740   | 500. 0526578 | 739. 509 | 855828. 3271 |
| M500T758   | 500. 0572697 | 757. 881 | 1279944. 021 |
| M500T68    | 500. 0964736 | 67. 6441 | 150481. 9934 |

|            |             |         |             |
|------------|-------------|---------|-------------|
| M500T285   | 500.1205231 | 285.167 | 444414.4088 |
| M500T96    | 500.1640953 | 96.4922 | 36440582.6  |
| M500T413   | 500.1949881 | 413.006 | 1517719.099 |
| M500T568   | 500.3010396 | 567.543 | 187428.207  |
| M501T572   | 501.1374066 | 572.152 | 349224.4668 |
| M501T102   | 501.1435494 | 101.563 | 51638498.89 |
| M501T373_1 | 501.155176  | 373.196 | 4466415.552 |
| M501T96    | 501.1605395 | 96.4922 | 6806509.236 |
| M501T373_2 | 501.167777  | 373.196 | 2134492.184 |
| M501T744   | 501.2060043 | 744.192 | 727902.1601 |
| M501T407   | 501.2134547 | 406.813 | 864925.3947 |
| M501T523   | 501.2296705 | 523.055 | 894327.1644 |
| M501T657   | 501.2317319 | 656.84  | 2394899.22  |
| M501T545   | 501.2349141 | 544.759 | 544821.6088 |
| M502T569   | 502.1312912 | 569.091 | 644271.8145 |
| M502T337   | 502.1433461 | 336.681 | 534306.8678 |
| M502T102   | 502.1511965 | 101.563 | 8794438.885 |
| M502T441   | 502.1509542 | 440.833 | 903872.787  |
| M502T99    | 502.1729135 | 98.9649 | 25679672.38 |
| M502T394_1 | 502.1741915 | 394.467 | 2740866.033 |
| M502T611   | 502.1916108 | 610.742 | 466579.0565 |
| M502T419   | 502.1915701 | 419.237 | 164412.9687 |
| M502T394_2 | 502.1848655 | 394.467 | 1597606.017 |
| M502T425_1 | 502.2050029 | 425.439 | 1826192.642 |
| M502T425_2 | 502.2168872 | 425.439 | 2524711.052 |
| M502T546   | 502.2328709 | 546.308 | 435482.2214 |
| M502T655   | 502.2396375 | 655.321 | 253934.5382 |
| M503T75    | 502.9826071 | 74.6705 | 4609279.6   |
| M503T314   | 503.1121406 | 313.612 | 947937.4232 |
| M503T303   | 503.1135398 | 303.259 | 1096896.516 |
| M503T166   | 503.1527869 | 165.522 | 4997700.903 |
| M503T172_1 | 503.1575079 | 171.546 | 3311514.551 |
| M503T243   | 503.1602991 | 243.386 | 795896.1156 |
| M503T106_1 | 503.1561875 | 105.537 | 374224060.1 |
| M503T124_1 | 503.1560952 | 123.792 | 86185339.95 |
| M503T98_1  | 503.1563791 | 97.682  | 406877272.1 |
| M503T300   | 503.1576422 | 300.176 | 611219.5501 |
| M503T438   | 503.157518  | 437.734 | 443724.9754 |
| M503T146_1 | 503.1560636 | 146.08  | 58163868.52 |
| M503T106_2 | 503.1692827 | 105.537 | 150609892   |
| M503T124_2 | 503.1694764 | 123.792 | 37513321.35 |
| M503T98_2  | 503.1685077 | 97.682  | 312366918.7 |
| M503T172_2 | 503.1722295 | 171.546 | 1207023.449 |
| M503T372   | 503.1697446 | 371.633 | 18964845.82 |
| M503T146_2 | 503.1688366 | 146.08  | 30617820.71 |
| M503T626_1 | 503.24472   | 626.183 | 14775720.75 |
| M503T652   | 503.2445972 | 652.285 | 6426653.794 |
| M503T537   | 503.258006  | 537.051 | 1420214.249 |
| M503T626_2 | 503.255427  | 626.183 | 10347937.73 |
| M504T106_1 | 504.1599441 | 105.537 | 74742865.81 |
| M504T122_1 | 504.1599186 | 122.381 | 16487161.61 |
| M504T98_1  | 504.1600395 | 97.682  | 74616634.89 |
| M504T146_1 | 504.1606191 | 146.08  | 12908417.78 |
| M504T221   | 504.1673744 | 221.453 | 1378010.145 |

|            |             |         |             |
|------------|-------------|---------|-------------|
| M504T106_2 | 504.1752114 | 105.537 | 46166244.19 |
| M504T122_2 | 504.1758585 | 122.381 | 7977051.018 |
| M504T98_2  | 504.1756199 | 97.682  | 46249368.91 |
| M504T146_2 | 504.1761537 | 146.08  | 4383476.096 |
| M504T94    | 504.1891184 | 94.1615 | 10485334.62 |
| M504T270   | 504.2287259 | 269.798 | 560934.9953 |
| M504T551   | 504.2425337 | 550.932 | 649607.9517 |
| M504T534   | 504.2424553 | 533.931 | 1271679.699 |
| M504T495   | 504.2898362 | 495.125 | 1501606.278 |
| M504T475   | 504.2905178 | 474.888 | 967972.1554 |
| M505T540   | 505.1627016 | 540.152 | 4715501.462 |
| M505T106   | 505.1651892 | 105.537 | 20953409.76 |
| M505T98    | 505.1651833 | 97.682  | 19940788.87 |
| M505T453   | 505.1896348 | 453.126 | 978625.9968 |
| M505T372   | 505.1884685 | 371.633 | 1025754.328 |
| M505T738   | 505.2014721 | 737.955 | 1707526.466 |
| M505T566   | 505.2462678 | 566.042 | 12462846.97 |
| M506T539   | 506.1681398 | 538.619 | 612707.0178 |
| M506T379   | 506.2324214 | 379.066 | 581981.8563 |
| M507T68    | 506.6153849 | 67.6441 | 253267.5298 |
| M507T789   | 507.1049789 | 788.604 | 3997394.063 |
| M507T835   | 507.1044943 | 835.329 | 2130976.893 |
| M507T381   | 507.1605034 | 380.608 | 395547.9398 |
| M507T459   | 507.1617665 | 459.324 | 4363909.309 |
| M507T458   | 507.173939  | 457.763 | 7560613.222 |
| M507T461_1 | 507.1983447 | 460.89  | 723341.6408 |
| M507T495   | 507.204112  | 495.125 | 336754.68   |
| M507T481   | 507.2039028 | 481.089 | 908814.5342 |
| M507T452   | 507.2038193 | 451.616 | 855908.9974 |
| M507T461_2 | 507.210129  | 460.89  | 887283.8198 |
| M508T713   | 508.1133041 | 713.292 | 1239829.666 |
| M508T69    | 508.1201397 | 69.1983 | 443359.4305 |
| M508T589_1 | 508.1376206 | 589.157 | 958267.707  |
| M508T396   | 508.1677961 | 396.023 | 789741.5621 |
| M508T459   | 508.1761701 | 459.324 | 2187787.599 |
| M508T750   | 508.1804435 | 750.298 | 8410982.584 |
| M508T537   | 508.1860339 | 537.051 | 187895.1498 |
| M508T601   | 508.1983418 | 601.473 | 625540.3735 |
| M508T572   | 508.1981027 | 572.152 | 322832.1157 |
| M508T580   | 508.2050247 | 579.883 | 1232602.682 |
| M508T589_2 | 508.2049272 | 589.157 | 527322.6198 |
| M508T462   | 508.21287   | 462.446 | 134345.5101 |
| M508T837   | 508.3420074 | 836.769 | 795378.6284 |
| M508T825   | 508.3418907 | 824.864 | 986836.2113 |
| M509T68    | 509.0715295 | 67.6441 | 120438.3557 |
| M509T413_1 | 509.1240322 | 413.006 | 2534066.561 |
| M509T413_2 | 509.1382203 | 413.006 | 445165.6079 |
| M509T331   | 509.1448    | 330.552 | 1083575.282 |
| M509T290   | 509.1652173 | 289.534 | 832168.9442 |
| M509T381   | 509.1878384 | 380.608 | 159870.3429 |
| M509T509_1 | 509.2103677 | 509.11  | 1822994.332 |
| M509T475_1 | 509.2103347 | 474.888 | 1822668.735 |
| M509T545   | 509.2194569 | 544.759 | 766691.2567 |
| M509T453   | 509.2161692 | 453.126 | 1429681.436 |

|            |              |          |              |
|------------|--------------|----------|--------------|
| M509T534   | 509. 2192877 | 533. 931 | 1904024. 727 |
| M509T464   | 509. 2222797 | 464. 011 | 6141163. 507 |
| M509T509_2 | 509. 2221076 | 509. 11  | 4017628. 543 |
| M509T475_2 | 509. 2223862 | 474. 888 | 4093420. 84  |
| M509T525   | 509. 2221637 | 524. 56  | 3634907. 107 |
| M509T490   | 509. 221988  | 490. 434 | 2500423. 441 |
| M510T503_1 | 509. 7619644 | 502. 873 | 882036. 5405 |
| M510T503_2 | 509. 7728788 | 502. 873 | 948311. 124  |
| M510T512   | 510. 086568  | 512. 228 | 888155. 5985 |
| M510T539   | 510. 0909746 | 538. 619 | 881499. 2811 |
| M510T413   | 510. 126432  | 413. 006 | 652666. 8038 |
| M510T411   | 510. 1379983 | 411. 444 | 660816. 375  |
| M510T256   | 510. 1539925 | 255. 831 | 121476. 9177 |
| M510T349   | 510. 1852854 | 348. 668 | 804877. 2581 |
| M510T600_1 | 510. 2154752 | 599. 904 | 37505422. 1  |
| M510T432   | 510. 2128133 | 431. 507 | 659236. 5671 |
| M510T614   | 510. 2154179 | 613. 824 | 2518603. 325 |
| M510T600_2 | 510. 2302114 | 599. 904 | 5900650. 116 |
| M510T525   | 510. 2297078 | 524. 56  | 641243. 3233 |
| M510T554   | 510. 2563674 | 554. 027 | 1188321. 658 |
| M510T697   | 510. 2782001 | 697. 061 | 1849064. 53  |
| M511T697   | 510. 7732841 | 697. 061 | 1266737. 506 |
| M511T347   | 511. 1329131 | 347. 166 | 1345357. 266 |
| M511T338   | 511. 132619  | 338. 222 | 1820670. 323 |
| M511T290_1 | 511. 137027  | 289. 534 | 4936028. 123 |
| M511T327   | 511. 1404472 | 327. 449 | 4911160. 639 |
| M511T315   | 511. 1405097 | 315. 162 | 2774927. 435 |
| M511T202   | 511. 1390833 | 201. 897 | 1031818. 501 |
| M511T346   | 511. 1454397 | 345. 761 | 5146131. 781 |
| M511T290_2 | 511. 1530097 | 289. 534 | 1293255. 081 |
| M511T321   | 511. 1589439 | 321. 312 | 162360. 7849 |
| M511T744   | 511. 1678458 | 744. 192 | 1968177. 909 |
| M511T349   | 511. 1794452 | 348. 668 | 4284536. 678 |
| M511T456   | 511. 1980436 | 456. 2   | 1270985. 742 |
| M511T600   | 511. 2200014 | 599. 904 | 9345218. 011 |
| M511T401   | 511. 2335136 | 400. 641 | 480211. 8532 |
| M511T441   | 511. 2396244 | 440. 833 | 1187536. 079 |
| M511T546_1 | 511. 2535873 | 546. 308 | 19984142. 99 |
| M511T546_2 | 511. 2679097 | 546. 308 | 64369024. 86 |
| M512T546_1 | 511. 7616767 | 546. 308 | 34692613. 62 |
| M512T546_2 | 511. 7738179 | 546. 308 | 14596515. 38 |
| M512T379   | 512. 1190742 | 379. 066 | 1878021. 926 |
| M512T296_1 | 512. 1199905 | 295. 704 | 1407813. 76  |
| M512T350_1 | 512. 1239331 | 350. 108 | 3050275. 023 |
| M512T318   | 512. 1241246 | 318. 232 | 897498. 3262 |
| M512T340   | 512. 1240959 | 339. 772 | 1533722. 492 |
| M512T288_1 | 512. 1309433 | 287. 981 | 400775. 5062 |
| M512T296_2 | 512. 1309917 | 295. 704 | 654746. 1989 |
| M512T327   | 512. 1446911 | 327. 449 | 644596. 8255 |
| M512T315   | 512. 1364983 | 315. 162 | 323698. 0736 |
| M512T350_2 | 512. 1363283 | 350. 108 | 672981. 619  |
| M512T288_2 | 512. 1446858 | 287. 981 | 652564. 2109 |
| M512T337   | 512. 1486531 | 336. 681 | 751467. 383  |
| M512T103   | 512. 1584303 | 102. 948 | 2533448. 859 |

|            |              |          |              |
|------------|--------------|----------|--------------|
| M512T277   | 512. 1694529 | 276. 825 | 1033400. 452 |
| M512T347   | 512. 1830101 | 347. 166 | 942369. 0785 |
| M512T600   | 512. 2164425 | 599. 904 | 1186010. 365 |
| M512T500   | 512. 2351227 | 499. 759 | 518359. 7683 |
| M512T532   | 512. 2302289 | 532. 372 | 799387. 6347 |
| M512T428   | 512. 233108  | 428. 448 | 1312379. 395 |
| M512T447   | 512. 2463856 | 446. 967 | 328938. 29   |
| M512T439   | 512. 2462701 | 439. 27  | 266776. 6843 |
| M512T546_3 | 512. 2671581 | 546. 308 | 14371211. 1  |
| M513T350   | 513. 1257935 | 350. 108 | 469150. 618  |
| M513T311_1 | 513. 1409945 | 310. 626 | 38502420. 28 |
| M513T107   | 513. 141935  | 106. 648 | 1915829. 826 |
| M513T337   | 513. 1410505 | 336. 681 | 1926789. 176 |
| M513T262   | 513. 1395335 | 262. 302 | 364241. 8994 |
| M513T202   | 513. 1496808 | 201. 897 | 514867. 4498 |
| M513T215   | 513. 1550254 | 215. 4   | 1675601. 533 |
| M513T311_2 | 513. 158859  | 310. 626 | 2492238. 296 |
| M513T293   | 513. 1589291 | 292. 621 | 3123701. 823 |
| M514T311   | 514. 1415692 | 310. 626 | 7054082. 401 |
| M514T305   | 514. 1563212 | 304. 743 | 1717711. 704 |
| M514T312   | 514. 1566737 | 312. 058 | 2102824. 638 |
| M514T511   | 514. 170481  | 510. 673 | 440805. 3017 |
| M514T166   | 514. 1807208 | 165. 522 | 511757. 1965 |
| M514T464   | 514. 2446896 | 464. 011 | 670110. 0755 |
| M515T799   | 515. 0815382 | 799. 306 | 4889140. 007 |
| M515T779   | 515. 0868829 | 779. 407 | 3879698. 833 |
| M515T464   | 515. 1133751 | 464. 011 | 520736. 8722 |
| M515T81_1  | 515. 1198989 | 80. 6174 | 40864629. 28 |
| M515T288_1 | 515. 1260099 | 287. 981 | 1919425. 992 |
| M515T487   | 515. 126575  | 487. 329 | 908077. 7548 |
| M515T215   | 515. 1291167 | 215. 4   | 2861105. 73  |
| M515T185   | 515. 1287434 | 185. 252 | 42537071. 97 |
| M515T81_2  | 515. 1339339 | 80. 6174 | 8063924. 821 |
| M515T184   | 515. 1449689 | 183. 708 | 37667181. 34 |
| M515T288_2 | 515. 1397093 | 287. 981 | 2184454. 897 |
| M515T100   | 515. 1561037 | 100. 283 | 10199452. 83 |
| M515T305   | 515. 1535169 | 304. 743 | 645371. 6539 |
| M515T205   | 515. 1617657 | 204. 895 | 416919. 6106 |
| M515T341   | 515. 1633612 | 341. 266 | 637288. 268  |
| M515T478   | 515. 1865152 | 477. 982 | 838531. 5972 |
| M515T103_1 | 515. 217072  | 102. 948 | 24478472. 72 |
| M515T93_1  | 515. 2171691 | 92. 9618 | 183116971. 9 |
| M515T103_2 | 515. 2289523 | 102. 948 | 7462605. 378 |
| M515T93_2  | 515. 2293045 | 92. 9618 | 58102844. 64 |
| M515T456   | 515. 2587175 | 456. 2   | 591618. 7823 |
| M516T528   | 516. 1056658 | 527. 688 | 1235781. 198 |
| M516T82    | 516. 1234217 | 81. 8855 | 7642742. 912 |
| M516T184   | 516. 1347892 | 183. 708 | 14815443. 99 |
| M516T385   | 516. 270325  | 385. 225 | 524536. 1915 |
| M516T514   | 516. 280408  | 513. 768 | 748845. 1063 |
| M517T515   | 516. 7765061 | 515. 338 | 627231. 1414 |
| M517T102   | 517. 0691435 | 101. 563 | 15298590. 59 |
| M517T114   | 517. 0745882 | 113. 762 | 2843054. 639 |
| M517T799   | 517. 0769832 | 799. 306 | 1066674. 491 |

|            |              |          |              |
|------------|--------------|----------|--------------|
| M517T778   | 517. 0826449 | 777. 92  | 1206277. 707 |
| M517T764   | 517. 0828723 | 764. 034 | 650745. 5925 |
| M517T825   | 517. 0829194 | 824. 864 | 2322568. 389 |
| M517T528   | 517. 1107236 | 527. 688 | 433582. 0602 |
| M517T104   | 517. 1386582 | 104. 493 | 16429290. 14 |
| M517T154   | 517. 1426835 | 153. 601 | 545293. 8925 |
| M517T450   | 517. 1552612 | 450. 052 | 4494247. 312 |
| M517T424   | 517. 1608884 | 423. 877 | 3374755. 598 |
| M517T185   | 517. 1582781 | 185. 252 | 1398328. 075 |
| M517T103   | 517. 1750973 | 102. 948 | 3151307. 238 |
| M517T92    | 517. 2030401 | 91. 9113 | 22057139. 5  |
| M517T467   | 517. 2219441 | 467. 127 | 366098. 1156 |
| M518T480   | 517. 7529943 | 479. 541 | 534410. 0922 |
| M518T294   | 518. 1330243 | 294. 152 | 440839. 2731 |
| M518T450   | 518. 1541736 | 450. 052 | 978989. 4249 |
| M518T589   | 518. 165947  | 589. 157 | 387591. 4173 |
| M518T681   | 518. 2255785 | 681. 406 | 878951. 3836 |
| M518T655   | 518. 2285333 | 655. 321 | 445076. 4887 |
| M518T580   | 518. 2476703 | 579. 883 | 1485004. 401 |
| M518T475   | 518. 2474711 | 474. 888 | 2623633. 783 |
| M518T703_1 | 518. 2628701 | 702. 622 | 17720796. 62 |
| M518T720_1 | 518. 2629511 | 719. 505 | 6798864. 246 |
| M518T703_2 | 518. 2754538 | 702. 622 | 27873010. 02 |
| M518T720_2 | 518. 2755038 | 719. 505 | 10410054. 84 |
| M519T580   | 518. 7512114 | 579. 883 | 1381707. 408 |
| M519T703_1 | 518. 7653841 | 702. 622 | 9093736. 264 |
| M519T703_2 | 518. 779385  | 702. 622 | 12352446. 77 |
| M519T79    | 519. 0352645 | 79. 4105 | 7813217. 896 |
| M519T81    | 519. 0471723 | 80. 6174 | 20909739. 24 |
| M519T498   | 519. 112957  | 498. 202 | 1825802. 008 |
| M519T100_1 | 519. 1495467 | 100. 283 | 49996707. 32 |
| M519T100_2 | 519. 162149  | 100. 283 | 46736529. 62 |
| M519T473   | 519. 1813785 | 473. 329 | 568622. 378  |
| M519T532   | 519. 1832557 | 532. 372 | 1560484. 311 |
| M519T481   | 519. 2395003 | 481. 089 | 791560. 6354 |
| M519T467_1 | 519. 2394165 | 467. 127 | 5767384. 6   |
| M519T453_1 | 519. 2531546 | 453. 126 | 1205791. 361 |
| M519T467_2 | 519. 2534175 | 467. 127 | 2090915. 616 |
| M519T453_2 | 519. 2671394 | 453. 126 | 1522240. 403 |
| M519T703_3 | 519. 2850419 | 702. 622 | 880302. 1263 |
| M520T453   | 519. 7675564 | 453. 126 | 890816. 974  |
| M520T108   | 520. 1099767 | 108. 082 | 761286. 3957 |
| M520T500   | 520. 1184639 | 499. 759 | 327474. 9685 |
| M520T179   | 520. 1478904 | 179. 046 | 438635. 5934 |
| M520T100   | 520. 1546997 | 100. 283 | 11476166. 78 |
| M520T331   | 520. 1629664 | 330. 552 | 1030528. 132 |
| M520T534   | 520. 178952  | 533. 931 | 614332. 08   |
| M520T367   | 520. 2028307 | 367. 026 | 315351. 0794 |
| M520T467_1 | 520. 2395956 | 467. 127 | 980900. 5052 |
| M520T375   | 520. 2477209 | 374. 746 | 363565. 8865 |
| M520T467_2 | 520. 2536682 | 467. 127 | 918279. 5496 |
| M521T67_1  | 521. 0676552 | 67. 1831 | 561348. 0273 |
| M521T67_2  | 521. 0842645 | 67. 1831 | 804584. 5353 |
| M521T399   | 521. 1240915 | 399. 086 | 2218405. 95  |

|            |              |          |              |
|------------|--------------|----------|--------------|
| M521T161   | 521. 126954  | 161. 184 | 2698459. 828 |
| M521T146   | 521. 1271494 | 146. 08  | 4939915. 539 |
| M521T108   | 521. 1267618 | 108. 082 | 3019781. 803 |
| M521T425   | 521. 1409104 | 425. 439 | 864250. 232  |
| M521T94    | 521. 1675304 | 94. 1615 | 22385379. 95 |
| M521T381   | 521. 1820984 | 380. 608 | 1082562. 228 |
| M521T424   | 521. 1832351 | 423. 877 | 794988. 5756 |
| M521T446   | 521. 1971766 | 445. 522 | 399129. 4732 |
| M521T781   | 521. 2833812 | 780. 958 | 838964. 5887 |
| M522T146   | 522. 1267983 | 146. 08  | 676988. 328  |
| M522T413   | 522. 151369  | 413. 006 | 705742. 8012 |
| M522T782   | 522. 2729959 | 782. 5   | 781003. 8306 |
| M522T829   | 522. 3813293 | 829. 321 | 1500066. 359 |
| M523T432   | 523. 1183401 | 431. 507 | 269355. 94   |
| M523T411   | 523. 1495257 | 411. 444 | 267643. 4637 |
| M523T433   | 523. 1704507 | 433. 06  | 1355134. 104 |
| M523T424   | 523. 171444  | 423. 877 | 456450. 7693 |
| M523T450   | 523. 1708488 | 450. 052 | 485926. 7011 |
| M523T410   | 523. 193852  | 409. 881 | 259779. 7254 |
| M523T353   | 523. 2066548 | 353. 163 | 876400. 8709 |
| M523T418   | 523. 2064479 | 417. 689 | 419931. 8256 |
| M523T484_1 | 523. 2148158 | 484. 221 | 6531533. 626 |
| M523T603   | 523. 2341605 | 603. 04  | 928251. 4003 |
| M523T484_2 | 523. 233021  | 484. 221 | 318792. 4187 |
| M523T498   | 523. 2418694 | 498. 202 | 634052. 2796 |
| M524T826   | 524. 0899737 | 826. 333 | 3757467. 01  |
| M524T766   | 524. 0899622 | 765. 588 | 1104628. 531 |
| M524T778   | 524. 0902566 | 777. 92  | 2135713. 112 |
| M524T835   | 524. 0900139 | 835. 329 | 3342656. 194 |
| M524T753   | 524. 0871562 | 753. 315 | 394767. 8832 |
| M524T805   | 524. 0949604 | 805. 145 | 6359790. 164 |
| M524T382   | 524. 1580157 | 382. 171 | 1886153. 03  |
| M524T701   | 524. 1706393 | 701. 149 | 3006880. 779 |
| M524T720   | 524. 1711455 | 719. 505 | 1279018. 535 |
| M524T707   | 524. 1826224 | 707. 143 | 2541724. 605 |
| M524T700   | 524. 1825489 | 699. 592 | 2479649. 937 |
| M524T481   | 524. 1923365 | 481. 089 | 818644. 3834 |
| M524T33    | 524. 303599  | 32. 8715 | 172767. 2906 |
| M524T764   | 524. 3296128 | 764. 034 | 1201267. 801 |
| M525T778   | 525. 0900123 | 777. 92  | 643390. 5058 |
| M525T819   | 525. 0929226 | 818. 743 | 1505986. 154 |
| M525T801   | 525. 0928387 | 800. 683 | 1327451. 179 |
| M525T835   | 525. 0927243 | 835. 329 | 1186916. 193 |
| M525T826   | 525. 1142457 | 826. 333 | 1189992. 937 |
| M525T119   | 525. 1270108 | 119. 413 | 1276058. 584 |
| M525T520   | 525. 1559273 | 519. 998 | 1160534. 769 |
| M525T326_1 | 525. 1541187 | 325. 901 | 1307814. 455 |
| M525T486_1 | 525. 1585121 | 485. 784 | 14302297. 68 |
| M525T394   | 525. 1581143 | 394. 467 | 1591049. 259 |
| M525T326_2 | 525. 1669375 | 325. 901 | 955933. 2239 |
| M525T504   | 525. 1700179 | 504. 432 | 1102861. 796 |
| M525T518   | 525. 1697304 | 518. 474 | 554242. 8038 |
| M525T707   | 525. 1744737 | 707. 143 | 994595. 6913 |
| M525T700   | 525. 1734954 | 699. 592 | 663195. 4065 |



|            |              |          |              |
|------------|--------------|----------|--------------|
| M525T486_2 | 525. 1699396 | 485. 784 | 7919303. 929 |
| M525T438_1 | 525. 1899973 | 437. 734 | 1966004. 476 |
| M525T438_2 | 525. 2082747 | 437. 734 | 574479. 6499 |
| M525T402   | 525. 2124593 | 402. 144 | 601258. 892  |
| M525T384   | 525. 2211859 | 383. 727 | 1029584. 428 |
| M525T622   | 525. 2529307 | 621. 547 | 1308979. 184 |
| M525T444   | 525. 3010712 | 443. 961 | 660697. 3733 |
| M525T807   | 525. 3411246 | 806. 698 | 195718. 5862 |
| M526T622_1 | 525. 758231  | 621. 547 | 1419630. 33  |
| M526T622_2 | 525. 7696372 | 621. 547 | 1053802. 138 |
| M526T508   | 526. 0782491 | 507. 55  | 1229829. 632 |
| M526T332   | 526. 1385518 | 332. 105 | 559554. 5778 |
| M526T486   | 526. 1615425 | 485. 784 | 3631447. 952 |
| M526T104   | 526. 1728469 | 104. 493 | 6070750. 082 |
| M526T543_1 | 526. 2061883 | 543. 216 | 539783. 1381 |
| M526T464_1 | 526. 2061081 | 464. 011 | 3439915. 973 |
| M526T475_1 | 526. 2059118 | 474. 888 | 2778307. 794 |
| M526T490_1 | 526. 2054895 | 490. 434 | 1255441. 688 |
| M526T509   | 526. 2101702 | 509. 11  | 3474614. 18  |
| M526T525   | 526. 2101529 | 524. 56  | 3288747. 183 |
| M526T543_2 | 526. 2197352 | 543. 216 | 693264. 7862 |
| M526T464_2 | 526. 2175598 | 464. 011 | 4107254. 068 |
| M526T475_2 | 526. 217359  | 474. 888 | 3263491. 33  |
| M526T490_2 | 526. 2172168 | 490. 434 | 1586602. 282 |
| M526T537_1 | 526. 2615955 | 537. 051 | 5822796. 661 |
| M526T612   | 526. 2674428 | 612. 3   | 1419706. 402 |
| M526T597   | 526. 2673618 | 596. 795 | 2958558. 054 |
| M526T551   | 526. 2731265 | 550. 932 | 5534470. 814 |
| M526T537_2 | 526. 2730442 | 537. 051 | 9299584. 976 |
| M526T523   | 526. 2787932 | 523. 055 | 2745917. 814 |
| M526T826   | 526. 353247  | 826. 333 | 892975. 9222 |
| M526T805   | 526. 3534366 | 805. 145 | 2207236. 895 |
| M526T779   | 526. 3532912 | 779. 407 | 13956401. 59 |
| M527T537_1 | 526. 7628866 | 537. 051 | 3093470. 543 |
| M527T525   | 526. 7617306 | 524. 56  | 1804140. 205 |
| M527T597   | 526. 7659061 | 596. 795 | 1084998. 924 |
| M527T537_2 | 526. 7743535 | 537. 051 | 5517464. 764 |
| M527T68_1  | 527. 0842257 | 67. 6441 | 9605992. 199 |
| M527T68_2  | 527. 0982923 | 67. 6441 | 2120783. 61  |
| M527T370   | 527. 1645363 | 370. 115 | 331271. 0991 |
| M527T486   | 527. 1615228 | 485. 784 | 690345. 8375 |
| M527T416   | 527. 2305107 | 416. 128 | 768676. 3955 |
| M527T629   | 527. 2593816 | 629. 272 | 729948. 3726 |
| M527T537_3 | 527. 2706252 | 537. 051 | 2351145. 947 |
| M527T396   | 527. 2863798 | 396. 023 | 1490882. 621 |
| M527T779   | 527. 3483416 | 779. 407 | 3839700. 778 |
| M528T376   | 527. 727873  | 376. 15  | 379989. 1832 |
| M528T537   | 527. 7704236 | 537. 051 | 670172. 8544 |
| M528T69    | 528. 0869971 | 69. 1983 | 1969847. 92  |
| M528T170   | 528. 1610761 | 170. 049 | 2242586. 818 |
| M528T424_1 | 528. 2597869 | 423. 877 | 2617034. 311 |
| M528T356   | 528. 2706272 | 356. 274 | 243099. 908  |
| M528T424_2 | 528. 2739633 | 423. 877 | 2218176. 852 |
| M528T396   | 528. 28265   | 396. 023 | 274502. 8384 |

|            |              |          |              |
|------------|--------------|----------|--------------|
| M529T69    | 529. 0609369 | 69. 1983 | 199757. 2341 |
| M529T68    | 529. 1011768 | 67. 6441 | 661095. 2959 |
| M529T176   | 529. 1390518 | 176. 104 | 726974. 0803 |
| M529T291   | 529. 1547115 | 291. 076 | 1661522. 404 |
| M529T182_1 | 529. 1504761 | 182. 156 | 2045829. 656 |
| M529T182_2 | 529. 1623949 | 182. 156 | 1985352. 295 |
| M529T643   | 529. 2048311 | 643. 166 | 728532. 4965 |
| M529T424   | 529. 2659897 | 423. 877 | 733115. 2345 |
| M530T175   | 530. 1302855 | 174. 576 | 3384934. 668 |
| M530T199   | 530. 1302029 | 198. 821 | 3457801. 789 |
| M530T291   | 530. 1330688 | 291. 076 | 6956142. 478 |
| M530T335_1 | 530. 1332959 | 335. 153 | 2617636. 018 |
| M530T314   | 530. 1330466 | 313. 612 | 6677524. 422 |
| M530T303   | 530. 1332964 | 303. 259 | 7513858. 774 |
| M530T264   | 530. 132934  | 264. 434 | 1851342. 782 |
| M530T160   | 530. 1329962 | 159. 635 | 1584505. 683 |
| M530T242   | 530. 1384101 | 242. 223 | 1071027. 373 |
| M530T335_2 | 530. 1444408 | 335. 153 | 775202. 0394 |
| M530T302   | 530. 1466279 | 301. 725 | 12303044. 77 |
| M530T352   | 530. 1476254 | 351. 663 | 153089. 2467 |
| M530T102   | 530. 16783   | 101. 563 | 5416932. 219 |
| M530T795   | 530. 2981504 | 794. 753 | 315738. 4594 |
| M531T302   | 531. 1347665 | 301. 725 | 2525757. 718 |
| M531T314   | 531. 1390999 | 313. 612 | 1093046. 062 |
| M531T217_1 | 531. 1416829 | 216. 95  | 1449995. 543 |
| M531T161_1 | 531. 1414729 | 161. 184 | 8490953. 037 |
| M531T146_1 | 531. 1420757 | 146. 08  | 25849605. 57 |
| M531T191_1 | 531. 1416574 | 191. 259 | 12067985. 43 |
| M531T107_1 | 531. 1531147 | 106. 648 | 89789365. 58 |
| M531T217_2 | 531. 1531183 | 216. 95  | 4033632. 423 |
| M531T161_2 | 531. 1530828 | 161. 184 | 32342387. 65 |
| M531T340   | 531. 1533504 | 339. 772 | 1147323. 031 |
| M531T146_2 | 531. 1532995 | 146. 08  | 88907999. 62 |
| M531T125_1 | 531. 1529369 | 125. 274 | 23913659. 99 |
| M531T191_2 | 531. 1532643 | 191. 259 | 41137161. 31 |
| M531T290   | 531. 158986  | 289. 534 | 1467797. 182 |
| M531T107_2 | 531. 1687338 | 106. 648 | 30572342. 67 |
| M531T161_3 | 531. 1684554 | 161. 184 | 10303076. 87 |
| M531T215   | 531. 1674839 | 215. 4   | 668085. 9617 |
| M531T146_3 | 531. 1678149 | 146. 08  | 29344340. 84 |
| M531T125_2 | 531. 1683399 | 125. 274 | 7854113. 815 |
| M531T191_3 | 531. 1663732 | 191. 259 | 24944188. 8  |
| M531T508   | 531. 1793844 | 507. 55  | 1543364. 172 |
| M531T701_1 | 531. 2200715 | 701. 149 | 9399366. 325 |
| M531T701_2 | 531. 2318944 | 701. 149 | 4207982. 251 |
| M531T503   | 531. 2589871 | 502. 873 | 166587. 9597 |
| M532T299   | 532. 1129691 | 298. 619 | 877366. 55   |
| M532T347   | 532. 1473948 | 347. 166 | 441146. 1897 |
| M532T167_1 | 532. 1520152 | 167. 01  | 3554472. 598 |
| M532T107_1 | 532. 1516161 | 106. 648 | 14699052. 39 |
| M532T297   | 532. 1531845 | 297. 149 | 1478970. 817 |
| M532T160_1 | 532. 1518711 | 159. 635 | 4935135. 968 |
| M532T146_1 | 532. 1517583 | 146. 08  | 14941754. 1  |
| M532T125_1 | 532. 1521394 | 125. 274 | 4141228. 454 |

|            |              |          |              |
|------------|--------------|----------|--------------|
| M532T191_1 | 532. 1518055 | 191. 259 | 6887694. 085 |
| M532T167_2 | 532. 1633576 | 167. 01  | 3835456. 734 |
| M532T107_2 | 532. 163332  | 106. 648 | 16691761. 24 |
| M532T160_2 | 532. 1632873 | 159. 635 | 5533778. 549 |
| M532T146_2 | 532. 163394  | 146. 08  | 17638963. 1  |
| M532T125_2 | 532. 1634402 | 125. 274 | 4354726. 227 |
| M532T191_2 | 532. 1634467 | 191. 259 | 7892001. 877 |
| M532T509   | 532. 1871427 | 509. 11  | 176562. 1517 |
| M532T701   | 532. 22301   | 701. 149 | 2937536. 575 |
| M532T759_1 | 532. 2639502 | 759. 428 | 426911. 5161 |
| M532T759_2 | 532. 2748552 | 759. 428 | 322404. 472  |
| M533T503_1 | 532. 7650165 | 502. 873 | 947847. 1722 |
| M533T503_2 | 532. 7770239 | 502. 873 | 715984. 3856 |
| M533T802_1 | 532. 9082297 | 802. 116 | 11555180. 18 |
| M533T834_1 | 532. 9198408 | 833. 866 | 6210612. 161 |
| M533T802_2 | 532. 9197126 | 802. 116 | 69530034. 92 |
| M533T834_2 | 532. 9315076 | 833. 866 | 3814119. 157 |
| M533T802_3 | 532. 9313805 | 802. 116 | 43547602. 3  |
| M533T823   | 532. 9370714 | 823. 375 | 974914. 2716 |
| M533T802_4 | 532. 9503035 | 802. 116 | 1120731. 862 |
| M533T484   | 533. 1238544 | 484. 221 | 292640. 7773 |
| M533T430   | 533. 1468401 | 429. 94  | 1305195. 646 |
| M533T589_1 | 533. 1559635 | 589. 157 | 3387901. 589 |
| M533T190_1 | 533. 1537864 | 189. 717 | 1491694. 998 |
| M533T146   | 533. 1588597 | 146. 08  | 2750673. 178 |
| M533T200   | 533. 1671933 | 200. 362 | 1112350. 309 |
| M533T103   | 533. 1705433 | 102. 948 | 8138936. 647 |
| M533T589_2 | 533. 1741536 | 589. 157 | 1653937. 289 |
| M533T277   | 533. 1735024 | 277. 42  | 182237. 4127 |
| M533T190_2 | 533. 1658897 | 189. 717 | 1335689. 462 |
| M533T520_1 | 533. 1823689 | 519. 998 | 11790470. 26 |
| M533T407   | 533. 1837471 | 406. 813 | 540686. 9355 |
| M533T520_2 | 533. 1998793 | 519. 998 | 1359177. 736 |
| M533T543   | 533. 205957  | 543. 216 | 323285. 642  |
| M533T618   | 533. 2197849 | 618. 45  | 601583. 8129 |
| M533T569   | 533. 2533035 | 569. 091 | 608721. 5893 |
| M534T804   | 533. 9224171 | 803. 615 | 6784484. 863 |
| M534T802   | 533. 9361437 | 802. 116 | 3652176. 723 |
| M534T367_1 | 534. 1761311 | 367. 026 | 784383. 495  |
| M534T367_2 | 534. 1878462 | 367. 026 | 1005933. 9   |
| M534T546   | 534. 2640037 | 546. 308 | 874771. 0646 |
| M535T834   | 534. 9147429 | 833. 866 | 1562978. 285 |
| M535T802_1 | 534. 9144681 | 802. 116 | 17545126. 92 |
| M535T832   | 534. 9269336 | 832. 338 | 3668271. 251 |
| M535T802_2 | 534. 9276211 | 802. 116 | 19006876. 72 |
| M535T589   | 535. 1701927 | 589. 157 | 569032. 07   |
| M535T461   | 535. 1755102 | 460. 89  | 167707. 1795 |
| M535T372   | 535. 1959738 | 371. 633 | 471113. 3241 |
| M535T475   | 535. 1992543 | 474. 888 | 809896. 642  |
| M535T455   | 535. 2024212 | 454. 645 | 1137434. 286 |
| M535T509_1 | 535. 2101338 | 509. 11  | 943450. 2777 |
| M535T509_2 | 535. 2231526 | 509. 11  | 882000. 4273 |
| M535T551_1 | 535. 2697234 | 550. 932 | 4864718. 155 |
| M535T563   | 535. 2698183 | 562. 946 | 2289669. 045 |

|            |              |          |              |
|------------|--------------|----------|--------------|
| M535T551_2 | 535. 2821365 | 550. 932 | 3625880. 846 |
| M536T67    | 536. 1198556 | 67. 1831 | 48701. 94414 |
| M536T143   | 536. 1487874 | 143. 174 | 793146. 9233 |
| M536T750   | 536. 1783365 | 750. 298 | 528204. 9432 |
| M536T209   | 536. 2121681 | 209. 472 | 539504. 4398 |
| M536T509_1 | 536. 2171722 | 509. 11  | 157716. 7307 |
| M536T511   | 536. 2291905 | 510. 673 | 2686577. 58  |
| M536T467_1 | 536. 2312373 | 467. 127 | 2128157. 28  |
| M536T509_2 | 536. 2428479 | 509. 11  | 1085875. 469 |
| M536T467_2 | 536. 2437873 | 467. 127 | 721910. 5414 |
| M537T391   | 537. 1734711 | 391. 341 | 382809. 2854 |
| M537T329   | 537. 1805686 | 328. 999 | 568828. 9094 |
| M537T318   | 537. 1806219 | 318. 232 | 387560. 2902 |
| M537T461   | 537. 1878471 | 460. 89  | 1643382. 507 |
| M537T490   | 537. 1938968 | 490. 434 | 1003873. 202 |
| M537T384   | 537. 2274997 | 383. 727 | 99586. 7201  |
| M537T529   | 537. 2311129 | 529. 248 | 425865. 5613 |
| M537T467   | 537. 2364652 | 467. 127 | 808379. 0747 |
| M537T404   | 537. 3016004 | 403. 698 | 437147. 9532 |
| M538T376   | 538. 1738623 | 376. 15  | 255644. 4613 |
| M538T743   | 538. 1888126 | 742. 631 | 6923190. 087 |
| M538T456_1 | 538. 2073835 | 456. 2   | 10708076. 11 |
| M538T467_1 | 538. 2066833 | 467. 127 | 1839488. 239 |
| M538T456_2 | 538. 2183506 | 456. 2   | 9337577. 441 |
| M538T467_2 | 538. 2182694 | 467. 127 | 1940600. 957 |
| M538T484   | 538. 2483817 | 484. 221 | 215581. 0551 |
| M538T672   | 538. 2842854 | 672. 229 | 975018. 0846 |
| M539T106_1 | 539. 1343012 | 105. 537 | 92322323. 91 |
| M539T146_1 | 539. 1343533 | 146. 08  | 29720191. 14 |
| M539T124   | 539. 1471667 | 123. 792 | 12327513. 28 |
| M539T106_2 | 539. 1475852 | 105. 537 | 36471378. 44 |
| M539T146_2 | 539. 1470625 | 146. 08  | 11898868. 91 |
| M539T744   | 539. 1906799 | 744. 192 | 1710128. 205 |
| M539T469   | 539. 2114943 | 468. 69  | 1299376. 237 |
| M539T456   | 539. 2168462 | 456. 2   | 3335418. 277 |
| M539T444   | 539. 2168385 | 443. 961 | 391438. 091  |
| M539T476_1 | 539. 224747  | 476. 451 | 2589305. 863 |
| M539T632   | 539. 2227157 | 632. 288 | 428928. 1051 |
| M539T442_1 | 539. 2321872 | 442. 399 | 2946707. 224 |
| M539T511_1 | 539. 2323417 | 510. 673 | 1436368. 943 |
| M539T401   | 539. 2322812 | 400. 641 | 1114152. 096 |
| M539T489   | 539. 2322345 | 488. 885 | 1264479. 463 |
| M539T501   | 539. 2320913 | 501. 318 | 1324993. 101 |
| M539T418   | 539. 2322568 | 417. 689 | 7269902. 369 |
| M539T476_2 | 539. 2416269 | 476. 451 | 1948282. 486 |
| M539T461   | 539. 2418733 | 460. 89  | 1578221. 58  |
| M539T442_2 | 539. 2451532 | 442. 399 | 1615079. 553 |
| M539T511_2 | 539. 244334  | 510. 673 | 967814. 9651 |
| M539T629_1 | 539. 2530497 | 629. 272 | 6164532. 028 |
| M539T640_1 | 539. 2649824 | 640. 057 | 1748962. 018 |
| M539T629_2 | 539. 2649261 | 629. 272 | 5550083. 372 |
| M539T640_2 | 539. 2827477 | 640. 057 | 6686285. 789 |
| M540T629   | 539. 757815  | 629. 272 | 4620484. 148 |
| M540T146_1 | 540. 1344883 | 146. 08  | 5652902. 056 |

|            |             |         |             |
|------------|-------------|---------|-------------|
| M540T106_1 | 540.1359172 | 105.537 | 15561569.31 |
| M540T433   | 540.1497407 | 433.06  | 1133905.997 |
| M540T146_2 | 540.1482695 | 146.08  | 3604604.473 |
| M540T106_2 | 540.1493102 | 105.537 | 10398764.78 |
| M540T435   | 540.1627149 | 434.617 | 707608.6471 |
| M540T390   | 540.1717263 | 389.839 | 438300.1321 |
| M540T381   | 540.1717966 | 380.608 | 434813.4653 |
| M540T456   | 540.2253608 | 456.2   | 352191.161  |
| M540T574   | 540.2285642 | 573.704 | 711559.4798 |
| M540T418   | 540.2445403 | 417.689 | 927637.3174 |
| M540T583_1 | 540.2634691 | 582.96  | 6520608.662 |
| M540T583_2 | 540.2773001 | 582.96  | 1518100.529 |
| M540T832   | 540.317389  | 832.338 | 3686899.915 |
| M540T749   | 540.3164971 | 748.742 | 7366606.006 |
| M540T729_1 | 540.3175945 | 728.711 | 5489540.605 |
| M540T810   | 540.319104  | 809.797 | 5396092.551 |
| M540T775   | 540.318293  | 774.892 | 16826007.94 |
| M540T798_1 | 540.3192239 | 797.757 | 5070981.724 |
| M540T712   | 540.3236803 | 711.794 | 12535857.69 |
| M540T835   | 540.3295969 | 835.329 | 4823094.314 |
| M540T729_2 | 540.3396061 | 728.711 | 5464135.038 |
| M540T744   | 540.3397221 | 744.192 | 5268519.273 |
| M540T766   | 540.3394962 | 765.588 | 5563632.921 |
| M540T776   | 540.339455  | 776.391 | 5237229.127 |
| M540T826   | 540.3397834 | 826.333 | 2641412.309 |
| M540T786   | 540.3394016 | 785.593 | 5247515.42  |
| M540T811   | 540.3391922 | 811.292 | 5493560.159 |
| M540T758   | 540.3397022 | 757.881 | 5885254.158 |
| M540T798_2 | 540.3394979 | 797.757 | 4090107.115 |
| M541T583_1 | 540.7737619 | 582.96  | 2695539.438 |
| M541T640   | 540.7821912 | 640.057 | 553014.2109 |
| M541T106   | 541.1315061 | 105.537 | 19620622.88 |
| M541T124   | 541.1311914 | 123.792 | 13441077.27 |
| M541T98    | 541.131509  | 97.682  | 8370298.507 |
| M541T146_1 | 541.1308691 | 146.08  | 9746485.771 |
| M541T103   | 541.1480063 | 102.948 | 17174215.84 |
| M541T146_2 | 541.1474856 | 146.08  | 4421186.861 |
| M541T355   | 541.1569099 | 354.719 | 219123.7336 |
| M541T323   | 541.1793594 | 322.862 | 501683.4224 |
| M541T347   | 541.2094024 | 347.166 | 214941.6514 |
| M541T583_2 | 541.2718394 | 582.96  | 1549206.803 |
| M541T399_1 | 541.2927013 | 399.086 | 3818819.099 |
| M541T399_2 | 541.3046396 | 399.086 | 2851068.331 |
| M541T826_1 | 541.324658  | 826.333 | 1390007.294 |
| M541T776_1 | 541.3243673 | 776.391 | 2712986.07  |
| M541T796   | 541.3249367 | 796.202 | 5120850.701 |
| M541T766   | 541.3287665 | 765.588 | 4797341.498 |
| M541T715   | 541.3288563 | 714.841 | 7403731.217 |
| M541T697   | 541.3286964 | 697.061 | 1523741.046 |
| M541T738   | 541.3286562 | 737.955 | 5835100.024 |
| M541T752_1 | 541.328753  | 751.766 | 5583171.375 |
| M541T835   | 541.3287567 | 835.329 | 1224260.045 |
| M541T790   | 541.339536  | 790.161 | 2337016.388 |
| M541T826_2 | 541.3394494 | 826.333 | 1638041.166 |

|            |              |          |              |
|------------|--------------|----------|--------------|
| M541T776_2 | 541. 3392961 | 776. 391 | 4023138. 877 |
| M541T802   | 541. 3388938 | 802. 116 | 1478271. 976 |
| M541T814   | 541. 339252  | 814. 118 | 1479612. 237 |
| M541T752_2 | 541. 3392051 | 751. 766 | 5423603. 158 |
| M542T583   | 541. 7751833 | 582. 96  | 241583. 2786 |
| M542T816   | 542. 0968317 | 815. 664 | 12167929. 82 |
| M542T740   | 542. 102741  | 739. 509 | 2515011. 72  |
| M542T778   | 542. 1030542 | 777. 92  | 3898653. 612 |
| M542T718   | 542. 1030115 | 717. 942 | 1475605. 733 |
| M542T764   | 542. 1032668 | 764. 034 | 3970880. 341 |
| M542T807   | 542. 1090749 | 806. 698 | 2475181. 855 |
| M542T825   | 542. 108977  | 824. 864 | 4252995. 466 |
| M542T106_1 | 542. 1421375 | 105. 537 | 3142399. 834 |
| M542T486_1 | 542. 1448391 | 485. 784 | 6708579. 565 |
| M542T486_2 | 542. 1568093 | 485. 784 | 5253742. 564 |
| M542T106_2 | 542. 1747109 | 105. 537 | 933934. 8623 |
| M542T370_1 | 542. 2764049 | 370. 115 | 5482753. 946 |
| M542T370_2 | 542. 2883779 | 370. 115 | 4137482. 28  |
| M542T399   | 542. 2977303 | 399. 086 | 1155796. 146 |
| M542T723   | 542. 3334046 | 722. 604 | 2469432. 501 |
| M542T753   | 542. 3334066 | 753. 315 | 1225076. 628 |
| M543T789   | 543. 1011301 | 788. 604 | 1587845. 525 |
| M543T778   | 543. 100988  | 777. 92  | 1188438. 083 |
| M543T799   | 543. 100734  | 799. 306 | 1608500. 493 |
| M543T486_1 | 543. 1491891 | 485. 784 | 1715958. 964 |
| M543T486_2 | 543. 1606918 | 485. 784 | 1092350. 467 |
| M543T746   | 543. 1850004 | 745. 747 | 345478. 6816 |
| M543T759_1 | 543. 2112433 | 759. 428 | 639094. 0176 |
| M543T759_2 | 543. 2237325 | 759. 428 | 1099655. 896 |
| M543T370   | 543. 2813337 | 370. 115 | 1629114. 506 |
| M544T556   | 543. 7501256 | 555. 524 | 144379. 5651 |
| M544T428   | 544. 1708573 | 428. 448 | 353577. 589  |
| M545T486_1 | 545. 0750258 | 485. 784 | 1102903. 531 |
| M545T486_2 | 545. 0870984 | 485. 784 | 1300042. 729 |
| M545T303   | 545. 1685986 | 303. 259 | 306284. 8239 |
| M545T103   | 545. 2168639 | 102. 948 | 3070624. 713 |
| M545T635   | 545. 2953771 | 635. 37  | 945451. 4932 |
| M546T68    | 546. 0753251 | 67. 6441 | 358843. 278  |
| M546T580   | 546. 2718599 | 579. 883 | 623593. 1995 |
| M547T251   | 547. 114274  | 251. 004 | 706181. 4047 |
| M547T106   | 547. 1506529 | 105. 537 | 5792714. 547 |
| M547T459   | 547. 1627136 | 459. 324 | 534624. 9164 |
| M547T452   | 547. 1623543 | 451. 616 | 1085827. 007 |
| M547T531   | 547. 2601553 | 530. 804 | 751370. 0392 |
| M547T618_1 | 547. 2702198 | 618. 45  | 2078966. 18  |
| M547T618_2 | 547. 2824214 | 618. 45  | 1166091. 37  |
| M548T68    | 548. 0741869 | 67. 6441 | 218830. 5979 |
| M548T66    | 548. 1171481 | 66. 2043 | 37718. 991   |
| M548T291   | 548. 1397662 | 291. 076 | 3301538. 139 |
| M548T147_1 | 548. 144591  | 147. 455 | 22410408. 57 |
| M548T161_1 | 548. 1445441 | 161. 184 | 13740198. 62 |
| M548T190_1 | 548. 1445694 | 189. 717 | 11385723. 02 |
| M548T108   | 548. 1441212 | 108. 082 | 13174853. 12 |
| M548T170   | 548. 144555  | 170. 049 | 10149983. 9  |

|            |             |         |             |
|------------|-------------|---------|-------------|
| M548T290   | 548.1518848 | 289.534 | 4200552.181 |
| M548T124   | 548.1567173 | 123.792 | 3812075.512 |
| M548T147_2 | 548.1560695 | 147.455 | 11093297.05 |
| M548T172   | 548.1566979 | 171.546 | 5262616.283 |
| M548T161_2 | 548.156713  | 161.184 | 6400738.99  |
| M548T190_2 | 548.1564411 | 189.717 | 5495052.855 |
| M548T402   | 548.1932671 | 402.144 | 203534.5486 |
| M548T556_1 | 548.2602506 | 555.524 | 65410465.25 |
| M548T556_2 | 548.2723652 | 555.524 | 38096428.84 |
| M549T106_1 | 548.7446193 | 105.537 | 6435072.683 |
| M549T556_1 | 548.7551291 | 555.524 | 16356315.26 |
| M549T556_2 | 548.7658509 | 555.524 | 39993479.1  |
| M549T556_3 | 548.7789814 | 555.524 | 2849615.857 |
| M549T68    | 549.0678064 | 67.6441 | 181382.5692 |
| M549T473   | 549.0915912 | 473.329 | 482458.8525 |
| M549T525   | 549.1223977 | 524.56  | 447239.6986 |
| M549T290   | 549.1517442 | 289.534 | 659406.7469 |
| M549T106_2 | 549.1531483 | 105.537 | 926169194.8 |
| M549T124_1 | 549.1532037 | 123.792 | 218252217.2 |
| M549T98_1  | 549.1529122 | 97.682  | 656835367.5 |
| M549T217   | 549.151782  | 216.95  | 802002.2014 |
| M549T161   | 549.1528417 | 161.184 | 5441408.43  |
| M549T190   | 549.153014  | 189.717 | 2365587.365 |
| M549T146_1 | 549.1532354 | 146.08  | 276311450.6 |
| M549T172_1 | 549.1606936 | 171.546 | 6969848.558 |
| M549T500   | 549.1593223 | 499.759 | 7359819.919 |
| M549T106_3 | 549.1653422 | 105.537 | 2308487051  |
| M549T124_2 | 549.1654087 | 123.792 | 539429599.5 |
| M549T98_2  | 549.1655283 | 97.682  | 2295166662  |
| M549T146_2 | 549.1654681 | 146.08  | 689008074.1 |
| M549T106_4 | 549.1774525 | 105.537 | 1017614983  |
| M549T124_3 | 549.1767408 | 123.792 | 232650895.4 |
| M549T98_3  | 549.1767899 | 97.682  | 971559939.5 |
| M549T172_2 | 549.1713554 | 171.546 | 4769020.188 |
| M549T146_3 | 549.176481  | 146.08  | 297428551.5 |
| M549T385   | 549.1808373 | 385.225 | 3080016.637 |
| M549T556_4 | 549.26621   | 555.524 | 14818951.36 |
| M549T556_5 | 549.2808065 | 555.524 | 2004357.745 |
| M550T106_1 | 549.5777726 | 105.537 | 6053670.995 |
| M550T67    | 550.1303794 | 67.1831 | 196007.397  |
| M550T430   | 550.1399726 | 429.94  | 2161502.383 |
| M550T106_2 | 550.1538737 | 105.537 | 66460104.84 |
| M550T124_1 | 550.1539191 | 123.792 | 15872762.83 |
| M550T98_1  | 550.1540697 | 97.682  | 69521963.92 |
| M550T172_1 | 550.153873  | 171.546 | 217085.7549 |
| M550T161_1 | 550.1542978 | 161.184 | 608165.8082 |
| M550T146_1 | 550.1540133 | 146.08  | 21560485.36 |
| M550T106_3 | 550.1676429 | 105.537 | 486099975.7 |
| M550T124_2 | 550.1676863 | 123.792 | 113988124   |
| M550T98_2  | 550.1678182 | 97.682  | 492230807.3 |
| M550T172_2 | 550.1676406 | 171.546 | 1324337.026 |
| M550T161_2 | 550.1677972 | 161.184 | 2861674.567 |
| M550T146_2 | 550.1677827 | 146.08  | 147909750.1 |
| M550T520   | 550.173905  | 519.998 | 2536991.499 |

|            |              |          |              |
|------------|--------------|----------|--------------|
| M550T326   | 550. 1737886 | 325. 901 | 864277. 7666 |
| M550T106_4 | 550. 1814124 | 105. 537 | 132510905. 4 |
| M550T98_3  | 550. 1816405 | 97. 682  | 123699766. 4 |
| M550T146_3 | 550. 1815477 | 146. 08  | 41637316. 95 |
| M550T125   | 550. 1816571 | 125. 274 | 27956823. 39 |
| M551T106_1 | 551. 1663064 | 105. 537 | 109944227    |
| M551T124   | 551. 1665136 | 123. 792 | 26420772. 8  |
| M551T98_1  | 551. 1666958 | 97. 682  | 111882704. 8 |
| M551T146_1 | 551. 1666229 | 146. 08  | 33168129. 32 |
| M551T470   | 551. 1724781 | 470. 253 | 581988. 9263 |
| M551T522   | 551. 1757757 | 521. 5   | 715989. 5055 |
| M551T106_2 | 551. 1784633 | 105. 537 | 69478026. 21 |
| M551T122   | 551. 1787667 | 122. 381 | 16620917. 25 |
| M551T98_2  | 551. 1789666 | 97. 682  | 67448273. 22 |
| M551T361_1 | 551. 1758121 | 360. 831 | 11437241. 64 |
| M551T146_2 | 551. 178894  | 146. 08  | 19933635. 57 |
| M551T361_2 | 551. 1911138 | 360. 831 | 1245601. 428 |
| M551T331   | 551. 2017668 | 330. 552 | 783639. 2383 |
| M551T441   | 551. 2113554 | 440. 833 | 1451333. 024 |
| M551T343_1 | 551. 240283  | 342. 819 | 780839. 6396 |
| M551T343_2 | 551. 2527812 | 342. 819 | 534731. 3141 |
| M551T805   | 551. 4540996 | 805. 145 | 5032233. 338 |
| M551T825_1 | 551. 4581623 | 824. 864 | 20164251. 73 |
| M551T835_1 | 551. 4566668 | 835. 329 | 25458427. 1  |
| M551T814_1 | 551. 4581723 | 814. 118 | 19823058. 17 |
| M551T786   | 551. 4704026 | 785. 593 | 15230903. 51 |
| M551T796   | 551. 470457  | 796. 202 | 16211258. 75 |
| M551T804   | 551. 4703788 | 803. 615 | 16996223. 63 |
| M551T720   | 551. 4704489 | 719. 505 | 720312. 214  |
| M551T825_2 | 551. 4704419 | 824. 864 | 34528487. 13 |
| M551T835_2 | 551. 4704844 | 835. 329 | 42016718. 06 |
| M551T814_2 | 551. 4704527 | 814. 118 | 33642531. 15 |
| M552T71    | 552. 0850375 | 70. 607  | 647446. 4029 |
| M552T106   | 552. 1709661 | 105. 537 | 18416038. 82 |
| M552T122   | 552. 1709144 | 122. 381 | 4259565. 114 |
| M552T98    | 552. 1711708 | 97. 682  | 18466684. 81 |
| M552T698   | 552. 169652  | 698. 034 | 487788. 2031 |
| M552T362   | 552. 1773293 | 362. 384 | 3747394. 852 |
| M552T455   | 552. 1862503 | 454. 645 | 379605. 5741 |
| M552T446   | 552. 2030773 | 445. 522 | 487578. 0468 |
| M552T525   | 552. 2483098 | 524. 56  | 446024. 7698 |
| M552T605   | 552. 2604313 | 604. 606 | 637731. 8395 |
| M552T811   | 552. 3651855 | 811. 292 | 19550701. 27 |
| M552T828   | 552. 4697909 | 827. 821 | 52976051. 43 |
| M552T789   | 552. 4698947 | 788. 604 | 5417254. 548 |
| M552T778   | 552. 469914  | 777. 92  | 4016908. 916 |
| M552T732   | 552. 4697792 | 731. 793 | 590949. 1525 |
| M553T71    | 553. 0771185 | 70. 607  | 2518431. 751 |
| M553T631   | 553. 2029726 | 630. 737 | 1394483. 449 |
| M553T381   | 553. 2071023 | 380. 608 | 281677. 5029 |
| M553T441   | 553. 218175  | 440. 833 | 443904. 7102 |
| M553T452   | 553. 2156286 | 451. 616 | 631924. 8908 |
| M553T655   | 553. 2649061 | 655. 321 | 1409990. 393 |
| M553T470   | 553. 2711718 | 470. 253 | 2578037. 05  |



|            |              |          |              |
|------------|--------------|----------|--------------|
| M553T649_1 | 553. 2898702 | 649. 195 | 24463962. 18 |
| M553T649_2 | 553. 3052964 | 649. 195 | 3370112. 184 |
| M553T807   | 553. 3667149 | 806. 698 | 1562545. 925 |
| M553T814   | 553. 3668508 | 814. 118 | 3381703. 211 |
| M553T829   | 553. 373108  | 829. 321 | 659449. 3733 |
| M553T825   | 553. 4776645 | 824. 864 | 2305252. 991 |
| M553T835   | 553. 4718355 | 835. 329 | 3612788. 525 |
| M554T655   | 553. 7616202 | 655. 321 | 1314814. 599 |
| M554T648_1 | 553. 7880123 | 647. 653 | 10858597. 26 |
| M554T648_2 | 553. 8007606 | 647. 653 | 8474425. 682 |
| M554T71    | 554. 0818188 | 70. 607  | 555531. 5163 |
| M554T92    | 554. 111236  | 91. 9113 | 7811537. 314 |
| M554T704_1 | 554. 1825445 | 704. 046 | 2501740. 253 |
| M554T697_1 | 554. 1823127 | 697. 061 | 2876302. 907 |
| M554T704_2 | 554. 1948749 | 704. 046 | 1513759. 144 |
| M554T697_2 | 554. 1949082 | 697. 061 | 985174. 315  |
| M554T631_1 | 554. 2648597 | 630. 737 | 1094422. 819 |
| M554T618_1 | 554. 2646115 | 618. 45  | 912893. 8481 |
| M554T631_2 | 554. 2783676 | 630. 737 | 3428378. 555 |
| M554T618_2 | 554. 2785731 | 618. 45  | 2924008. 077 |
| M554T649_1 | 554. 2873648 | 649. 195 | 3052446. 097 |
| M554T470   | 554. 2849077 | 470. 253 | 748028. 6205 |
| M554T649_2 | 554. 3014764 | 649. 195 | 3044412. 908 |
| M554T750   | 554. 3435806 | 750. 298 | 1442112. 043 |
| M554T786   | 554. 3433856 | 785. 593 | 31072397. 9  |
| M554T738   | 554. 3434906 | 737. 955 | 1275805. 668 |
| M554T835   | 554. 3494864 | 835. 329 | 688924. 2773 |
| M554T834   | 554. 3838068 | 833. 866 | 2071151. 04  |
| M555T648   | 554. 8050878 | 647. 653 | 511078. 9081 |
| M555T67    | 555. 080423  | 67. 1831 | 100183. 0863 |
| M555T700   | 555. 1859198 | 699. 592 | 1225559. 972 |
| M555T532   | 555. 2148249 | 532. 372 | 794390. 1306 |
| M555T410_1 | 555. 2214718 | 409. 881 | 1619560. 963 |
| M555T410_2 | 555. 2349337 | 409. 881 | 1208324. 575 |
| M555T598_1 | 555. 2593717 | 598. 341 | 5953385. 733 |
| M555T598_2 | 555. 2758076 | 598. 341 | 18359823. 48 |
| M555T384   | 555. 2732901 | 383. 727 | 344681. 2848 |
| M555T631   | 555. 2882811 | 630. 737 | 1102744. 426 |
| M555T784   | 555. 3443213 | 784. 051 | 9097284. 928 |
| M556T598_1 | 555. 7696025 | 598. 341 | 11285506. 98 |
| M556T597   | 555. 7837241 | 596. 795 | 4513452. 243 |
| M556T446   | 555. 7926374 | 445. 522 | 363197. 8915 |
| M556T442   | 556. 2200918 | 442. 399 | 654620. 7426 |
| M556T598_2 | 556. 2669667 | 598. 341 | 2748388. 158 |
| M556T598_3 | 556. 2824688 | 598. 341 | 2643048. 848 |
| M557T741   | 557. 2133683 | 741. 077 | 104850. 8351 |
| M557T577_1 | 557. 2326248 | 576. 787 | 2274813. 89  |
| M557T577_2 | 557. 2450769 | 576. 787 | 1654364. 371 |
| M557T518   | 557. 2668379 | 518. 474 | 266308. 9049 |
| M557T522_1 | 557. 3232992 | 521. 5   | 2043605. 726 |
| M557T522_2 | 557. 338885  | 521. 5   | 2149785. 225 |
| M558T583   | 558. 2484197 | 582. 96  | 668458. 5471 |
| M558T522_1 | 558. 3287771 | 521. 5   | 796504. 5253 |
| M558T834   | 558. 3292479 | 833. 866 | 3065254. 862 |

|            |              |          |              |
|------------|--------------|----------|--------------|
| M558T825   | 558. 329195  | 824. 864 | 4964144. 438 |
| M558T522_2 | 558. 3415694 | 521. 5   | 667659. 9781 |
| M559T804   | 558. 9205666 | 803. 615 | 3038256. 99  |
| M559T709   | 559. 0805754 | 708. 697 | 169936. 0013 |
| M559T208   | 559. 1368804 | 207. 935 | 1269188. 412 |
| M559T500   | 559. 1712248 | 499. 759 | 699540. 2717 |
| M559T509   | 559. 1710116 | 509. 11  | 2569459. 721 |
| M559T331   | 559. 1802976 | 330. 552 | 1081709. 903 |
| M559T320_1 | 559. 1795116 | 319. 785 | 2042183. 335 |
| M559T312_1 | 559. 1797964 | 312. 058 | 1745458. 458 |
| M559T332   | 559. 1931856 | 332. 105 | 883190. 5641 |
| M559T320_2 | 559. 193064  | 319. 785 | 1667961. 197 |
| M559T312_2 | 559. 1933318 | 312. 058 | 1469626. 144 |
| M559T835_1 | 559. 3034804 | 835. 329 | 787289. 4052 |
| M559T835_2 | 559. 3191368 | 835. 329 | 170632. 0926 |
| M559T834   | 559. 3378171 | 833. 866 | 524637. 5464 |
| M559T826   | 559. 337793  | 826. 333 | 1444446. 498 |
| M560T320   | 560. 1949248 | 319. 785 | 494924. 3389 |
| M560T312   | 560. 1949359 | 312. 058 | 396828. 3399 |
| M560T654   | 560. 2703454 | 653. 835 | 2021860. 576 |
| M560T828   | 560. 3335497 | 827. 821 | 1417953. 786 |
| M561T804   | 560. 918422  | 803. 615 | 798378. 548  |
| M561T770_1 | 561. 227324  | 770. 235 | 926567. 3552 |
| M561T746   | 561. 2373071 | 745. 747 | 889960. 2161 |
| M561T770_2 | 561. 2392846 | 770. 235 | 651068. 847  |
| M561T425   | 561. 2623539 | 425. 439 | 416089. 7929 |
| M561T744_1 | 561. 2829077 | 744. 192 | 2346635. 813 |
| M561T721_1 | 561. 283914  | 721. 058 | 603327. 3572 |
| M561T736_1 | 561. 2828156 | 736. 458 | 2033682. 348 |
| M561T674_1 | 561. 2811137 | 673. 771 | 2210207. 626 |
| M561T744_2 | 561. 2966237 | 744. 192 | 1916409. 258 |
| M561T721_2 | 561. 2964943 | 721. 058 | 450854. 1058 |
| M561T736_2 | 561. 296657  | 736. 458 | 1742295. 733 |
| M561T674_2 | 561. 2937396 | 673. 771 | 3639232. 264 |
| M561T674_3 | 561. 3052668 | 673. 771 | 333115. 0155 |
| M562T672_1 | 561. 7855429 | 672. 229 | 1747092. 761 |
| M562T672_2 | 561. 7980593 | 672. 229 | 1620258. 607 |
| M562T581_1 | 562. 2599205 | 581. 442 | 29292027. 85 |
| M562T600   | 562. 269488  | 599. 904 | 613389. 1108 |
| M562T444   | 562. 2713777 | 443. 961 | 222547. 4252 |
| M562T581_2 | 562. 2761739 | 581. 442 | 2453142. 118 |
| M562T816   | 562. 3106364 | 815. 664 | 5316889. 206 |
| M563T581   | 562. 7527053 | 581. 442 | 6997520. 6   |
| M563T583_1 | 562. 7660559 | 582. 96  | 16225925. 5  |
| M563T475_1 | 563. 1368756 | 474. 888 | 838786. 4624 |
| M563T461   | 563. 136521  | 460. 89  | 6447442. 244 |
| M563T450_1 | 563. 1365069 | 450. 052 | 3966283. 443 |
| M563T424_1 | 563. 1524032 | 423. 877 | 2988490. 607 |
| M563T475_2 | 563. 1507276 | 474. 888 | 313694. 0121 |
| M563T424_2 | 563. 1650766 | 423. 877 | 3901162. 358 |
| M563T450_2 | 563. 1618354 | 450. 052 | 7801311. 15  |
| M563T119   | 563. 1840235 | 119. 413 | 1191233. 654 |
| M563T107   | 563. 1841051 | 106. 648 | 3400871. 728 |
| M563T160   | 563. 1866986 | 159. 635 | 5487525. 807 |

|            |              |          |              |
|------------|--------------|----------|--------------|
| M563T770   | 563. 1999271 | 770. 235 | 4477295. 76  |
| M563T583_2 | 563. 2515554 | 582. 96  | 4996462. 852 |
| M563T583_3 | 563. 2696598 | 582. 96  | 48977994. 52 |
| M563T608   | 563. 274767  | 607. 625 | 1858400. 56  |
| M563T618   | 563. 2753296 | 618. 45  | 411999. 4726 |
| M564T583_1 | 563. 7645654 | 582. 96  | 19803393. 5  |
| M564T583_2 | 563. 7756679 | 582. 96  | 24891956. 73 |
| M564T500   | 564. 1046327 | 499. 759 | 369984. 5881 |
| M564T461_1 | 564. 138386  | 460. 89  | 1743887. 296 |
| M564T450_1 | 564. 1393569 | 450. 052 | 921729. 7289 |
| M564T142   | 564. 1453603 | 141. 655 | 781400. 7124 |
| M564T461_2 | 564. 1543999 | 460. 89  | 362465. 6178 |
| M564T450_2 | 564. 1551822 | 450. 052 | 1181977. 202 |
| M564T422   | 564. 161065  | 422. 362 | 1207891. 732 |
| M564T769   | 564. 2089736 | 768. 696 | 1520302. 933 |
| M564T583_3 | 564. 2552314 | 582. 96  | 832690. 8441 |
| M564T569   | 564. 2616784 | 569. 091 | 348991. 9232 |
| M564T583_4 | 564. 2696745 | 582. 96  | 9219511. 569 |
| M564T837   | 564. 3268053 | 836. 769 | 14591507. 01 |
| M564T805   | 564. 3264355 | 805. 145 | 1264550. 996 |
| M565T583   | 564. 7553851 | 582. 96  | 177210. 4511 |
| M565T442   | 565. 1793589 | 442. 399 | 3298539. 231 |
| M565T804   | 565. 1791842 | 803. 615 | 1368031. 049 |
| M565T546_1 | 565. 1890893 | 546. 308 | 1254429. 063 |
| M565T532   | 565. 1889662 | 532. 372 | 2337672. 06  |
| M565T770   | 565. 1945049 | 770. 235 | 1031911. 924 |
| M565T546_2 | 565. 2015453 | 546. 308 | 748892. 4954 |
| M565T531   | 565. 202637  | 530. 804 | 1020880. 278 |
| M565T772   | 565. 2067657 | 771. 785 | 1576247. 695 |
| M566T124_1 | 566. 1476537 | 123. 792 | 76170957. 86 |
| M566T107_1 | 566. 1478272 | 106. 648 | 96032442. 19 |
| M566T172_1 | 566. 1492714 | 171. 546 | 4011952. 183 |
| M566T98_1  | 566. 1475553 | 97. 682  | 25915559. 59 |
| M566T146_1 | 566. 1477461 | 146. 08  | 61364865. 32 |
| M566T124_2 | 566. 1620269 | 123. 792 | 69789096. 49 |
| M566T107_2 | 566. 1619453 | 106. 648 | 91999299. 48 |
| M566T172_2 | 566. 1620442 | 171. 546 | 3774254. 642 |
| M566T98_2  | 566. 1619931 | 97. 682  | 24205478. 63 |
| M566T146_2 | 566. 1621185 | 146. 08  | 57394517. 43 |
| M566T557   | 566. 2452009 | 557. 078 | 384333. 9199 |
| M566T837   | 566. 333668  | 836. 769 | 1177555. 807 |
| M566T724   | 566. 3379408 | 724. 158 | 15428769. 12 |
| M566T766   | 566. 3333058 | 765. 588 | 8809510. 92  |
| M566T792_1 | 566. 3333804 | 791. 678 | 3128018. 461 |
| M566T822   | 566. 3336788 | 821. 831 | 2381652. 024 |
| M566T740_1 | 566. 3379078 | 739. 509 | 15234374. 65 |
| M566T712_1 | 566. 3378735 | 711. 794 | 10088745. 49 |
| M566T752_1 | 566. 3378954 | 751. 766 | 13575981. 72 |
| M566T767   | 566. 354172  | 767. 145 | 8761486. 346 |
| M566T792_2 | 566. 3547401 | 791. 678 | 2351520. 612 |
| M566T740_2 | 566. 3506906 | 739. 509 | 15988176. 8  |
| M566T712_2 | 566. 3506547 | 711. 794 | 10179480. 95 |
| M566T752_2 | 566. 3544844 | 751. 766 | 11097337. 69 |
| M566T784   | 566. 3543888 | 784. 051 | 3448563. 588 |

|            |              |          |              |
|------------|--------------|----------|--------------|
| M566T804   | 566. 3551801 | 803. 615 | 1872587. 911 |
| M566T829   | 566. 3549275 | 829. 321 | 2581990. 15  |
| M567T119   | 567. 0318924 | 119. 413 | 296718. 2787 |
| M567T107_1 | 567. 1503632 | 106. 648 | 13537328. 25 |
| M567T146_1 | 567. 1504662 | 146. 08  | 8597208. 245 |
| M567T107_2 | 567. 1663803 | 106. 648 | 15757843. 66 |
| M567T146_2 | 567. 1664729 | 146. 08  | 9906662. 923 |
| M567T372   | 567. 1759974 | 371. 633 | 201227. 6787 |
| M567T356   | 567. 1913497 | 356. 274 | 644748. 9526 |
| M567T399   | 567. 2048481 | 399. 086 | 362193. 8164 |
| M567T504_1 | 567. 2047843 | 504. 432 | 4326281. 736 |
| M567T492   | 567. 204731  | 491. 99  | 3738846. 963 |
| M567T504_2 | 567. 216313  | 504. 432 | 2245605. 376 |
| M567T490   | 567. 2167369 | 490. 434 | 1549892. 718 |
| M567T810   | 567. 3553416 | 809. 797 | 1129499. 73  |
| M568T829   | 567. 9162028 | 829. 321 | 271735. 5825 |
| M568T119   | 568. 1548818 | 119. 413 | 3021928. 032 |
| M568T107   | 568. 1572459 | 106. 648 | 6321530. 037 |
| M568T146   | 568. 1574054 | 146. 08  | 4077581. 921 |
| M568T492   | 568. 2218868 | 491. 99  | 162579. 0349 |
| M568T503   | 568. 2203931 | 502. 873 | 483100. 9239 |
| M568T635   | 568. 3104183 | 635. 37  | 708663. 1762 |
| M568T826_1 | 568. 350423  | 826. 333 | 176968129. 2 |
| M568T769   | 568. 3555506 | 768. 696 | 18912394. 29 |
| M568T796   | 568. 3554292 | 796. 202 | 10495071. 98 |
| M568T826_2 | 568. 3646586 | 826. 333 | 243532434. 7 |
| M569T635_1 | 568. 7930889 | 635. 37  | 1415561. 892 |
| M569T635_2 | 568. 8058712 | 635. 37  | 1323113. 031 |
| M569T444_1 | 569. 1782795 | 443. 961 | 2416976. 8   |
| M569T444_2 | 569. 1904733 | 443. 961 | 2991734. 92  |
| M569T329   | 569. 2022986 | 328. 999 | 1179378. 86  |
| M569T327   | 569. 2146545 | 327. 449 | 2243444. 177 |
| M569T581_1 | 569. 2636592 | 581. 442 | 31020673. 12 |
| M569T643   | 569. 2700321 | 643. 166 | 6588629. 278 |
| M569T626   | 569. 2701141 | 626. 183 | 11393355. 54 |
| M569T581_2 | 569. 2765387 | 581. 442 | 24264327. 43 |
| M569T525   | 569. 2931095 | 524. 56  | 925836. 5819 |
| M569T835_1 | 569. 3281406 | 835. 329 | 1360935. 683 |
| M569T828   | 569. 3474897 | 827. 821 | 5655795. 586 |
| M569T730   | 569. 3605624 | 730. 264 | 869793. 8437 |
| M569T764   | 569. 3595785 | 764. 034 | 3525671. 977 |
| M569T825   | 569. 359422  | 824. 864 | 56171208. 26 |
| M569T835_2 | 569. 3591242 | 835. 329 | 20400373     |
| M569T721   | 569. 363578  | 721. 058 | 726722. 2316 |
| M569T826   | 569. 3761568 | 826. 333 | 14625881. 67 |
| M570T581_1 | 569. 7665074 | 581. 442 | 20767263. 06 |
| M570T643_1 | 569. 7663745 | 643. 166 | 2917457. 025 |
| M570T626   | 569. 7666022 | 626. 183 | 5406566. 149 |
| M570T581_2 | 569. 7826289 | 581. 442 | 6497265. 278 |
| M570T362   | 570. 1938401 | 362. 384 | 138870. 7652 |
| M570T453   | 570. 1986245 | 453. 126 | 382228. 445  |
| M570T444   | 570. 1991574 | 443. 961 | 368548. 7924 |
| M570T518   | 570. 233683  | 518. 474 | 402362. 4458 |
| M570T581_3 | 570. 258853  | 581. 442 | 2104407. 87  |

|            |             |         |             |
|------------|-------------|---------|-------------|
| M570T618_1 | 570.2667177 | 618.45  | 6577535.057 |
| M570T581_4 | 570.273032  | 581.442 | 14435302.47 |
| M570T643_2 | 570.2728027 | 643.166 | 1118077.734 |
| M570T634_1 | 570.2727931 | 633.832 | 5127463.491 |
| M570T618_2 | 570.279631  | 618.45  | 14951800.35 |
| M570T634_2 | 570.2873356 | 633.832 | 1918606.194 |
| M570T826   | 570.3635083 | 826.333 | 14881239.58 |
| M571T581_1 | 570.7709621 | 581.442 | 4652484.193 |
| M571T467   | 570.7763021 | 467.127 | 339097.2629 |
| M571T618_1 | 570.777167  | 618.45  | 8432369.669 |
| M571T581_2 | 570.7842472 | 581.442 | 4021690.631 |
| M571T618_2 | 570.7901177 | 618.45  | 2087855.077 |
| M571T122   | 571.1271286 | 122.381 | 9585732.345 |
| M571T146   | 571.129591  | 146.08  | 1526237.966 |
| M571T455   | 571.2131313 | 454.645 | 207801.192  |
| M571T556_1 | 571.2591877 | 555.524 | 13842097.16 |
| M571T556_2 | 571.2752936 | 555.524 | 11226142.71 |
| M571T834   | 571.3725734 | 833.866 | 1079391.441 |
| M571T823   | 571.3735286 | 823.375 | 813278.9578 |
| M572T556_1 | 571.7678211 | 555.524 | 12845924.45 |
| M572T618   | 571.7745142 | 618.45  | 678312.8083 |
| M572T556_2 | 571.7801423 | 555.524 | 2218578.226 |
| M572T535   | 572.2186514 | 535.488 | 120877.784  |
| M572T556_3 | 572.267167  | 555.524 | 3955225.069 |
| M572T481   | 572.2740141 | 481.089 | 421597.4001 |
| M572T556_4 | 572.2811026 | 555.524 | 762527.0907 |
| M573T640   | 572.7615173 | 640.057 | 161858.1217 |
| M573T749   | 573.2291671 | 748.742 | 1148994.087 |
| M573T729   | 573.2326455 | 728.711 | 4752145.492 |
| M573T770_1 | 573.2294026 | 770.235 | 23959960.27 |
| M573T671   | 573.2292428 | 670.674 | 1197290.073 |
| M573T786   | 573.2292453 | 785.593 | 1607563.8   |
| M573T770_2 | 573.243937  | 770.235 | 10073781.48 |
| M574T98    | 574.1942212 | 97.682  | 10918420.89 |
| M574T770_1 | 574.2297155 | 770.235 | 6361151.068 |
| M574T770_2 | 574.242764  | 770.235 | 5503301.452 |
| M574T598   | 574.2917464 | 598.341 | 3200349.426 |
| M574T522_1 | 574.3146642 | 521.5   | 912157.6649 |
| M574T522_2 | 574.3277163 | 521.5   | 956730.2937 |
| M575T598   | 574.7928252 | 598.341 | 2132015.241 |
| M575T787   | 575.0463903 | 787.078 | 791134.0939 |
| M575T817   | 575.0463664 | 817.214 | 1031916.317 |
| M575T600   | 575.1308378 | 599.904 | 508207.2269 |
| M575T106   | 575.1770473 | 105.537 | 3284096.556 |
| M575T770   | 575.2328442 | 770.235 | 1397837.295 |
| M575T419   | 575.232725  | 419.237 | 296248.4227 |
| M575T594   | 575.2678798 | 593.841 | 1346328.726 |
| M575T537   | 575.2747998 | 537.051 | 517199.1941 |
| M575T592   | 575.2817064 | 592.284 | 750819.9839 |
| M575T640_1 | 575.2883059 | 640.057 | 4929597.815 |
| M575T597   | 575.3051117 | 596.795 | 770579.3777 |
| M575T640_2 | 575.2999627 | 640.057 | 1331091.118 |
| M576T694   | 575.786015  | 694.341 | 466128.839  |
| M576T638   | 575.7854873 | 638.484 | 2772730.493 |

|            |              |          |              |
|------------|--------------|----------|--------------|
| M576T511_1 | 576. 1596834 | 510. 673 | 415823. 8809 |
| M576T511_2 | 576. 1727931 | 510. 673 | 417379. 8966 |
| M576T643   | 576. 275962  | 643. 166 | 24331570. 09 |
| M576T625   | 576. 2744688 | 624. 642 | 4717209. 148 |
| M576T549   | 576. 2846244 | 549. 371 | 305637. 8192 |
| M576T649   | 576. 298039  | 649. 195 | 193176013. 6 |
| M577T643_1 | 576. 7783364 | 643. 166 | 15856062. 1  |
| M577T648_1 | 576. 7997209 | 647. 653 | 117131047. 3 |
| M577T789   | 576. 9113743 | 788. 604 | 394053. 2337 |
| M577T478   | 577. 1479223 | 477. 982 | 268782. 2888 |
| M577T480   | 577. 1597207 | 479. 541 | 258098. 8227 |
| M577T203   | 577. 1576592 | 203. 346 | 1727859. 226 |
| M577T179   | 577. 1574774 | 179. 046 | 1393986. 267 |
| M577T191   | 577. 1671295 | 191. 259 | 1283330. 648 |
| M577T469   | 577. 2268359 | 468. 69  | 264315. 3367 |
| M577T456_1 | 577. 2367524 | 456. 2   | 921314. 1909 |
| M577T506   | 577. 2430285 | 505. 99  | 792063. 1315 |
| M577T456_2 | 577. 2530772 | 456. 2   | 2455007. 088 |
| M577T744_1 | 577. 25984   | 744. 192 | 2480029. 935 |
| M577T559   | 577. 2664261 | 558. 574 | 878274. 0026 |
| M577T744_2 | 577. 2733596 | 744. 192 | 942986. 7898 |
| M577T643_2 | 577. 279609  | 643. 166 | 5562752. 551 |
| M577T551   | 577. 2828138 | 550. 932 | 858250. 1936 |
| M577T626_1 | 577. 2797035 | 626. 183 | 2209440. 563 |
| M577T617_1 | 577. 2777256 | 616. 891 | 1282202. 447 |
| M577T626_2 | 577. 2911675 | 626. 183 | 1553650. 779 |
| M577T648_2 | 577. 2916076 | 647. 653 | 40516122. 59 |
| M577T617_2 | 577. 2920522 | 616. 891 | 1379879. 384 |
| M577T649   | 577. 305775  | 649. 195 | 27607631. 06 |
| M577T837   | 577. 4802225 | 836. 769 | 13413269. 4  |
| M577T801   | 577. 480207  | 800. 683 | 1453479. 06  |
| M578T648_1 | 577. 7893367 | 647. 653 | 7355281. 296 |
| M578T648_2 | 577. 8051725 | 647. 653 | 10567642. 77 |
| M578T66    | 578. 1220625 | 66. 2043 | 106600. 7033 |
| M578T769   | 578. 2150843 | 768. 696 | 624750. 2169 |
| M578T730   | 578. 2332151 | 730. 264 | 516865. 4261 |
| M578T444   | 578. 231004  | 443. 961 | 790219. 2906 |
| M578T597_1 | 578. 2699617 | 596. 795 | 5959158. 75  |
| M578T556_1 | 578. 2739638 | 555. 524 | 19009623. 07 |
| M578T736   | 578. 2806898 | 736. 458 | 517321. 4081 |
| M578T597_2 | 578. 2845529 | 596. 795 | 2092185. 307 |
| M578T556_2 | 578. 2871852 | 555. 524 | 3602534. 902 |
| M578T648_3 | 578. 3043672 | 647. 653 | 2411833. 265 |
| M578T835   | 578. 4883555 | 835. 329 | 2792882. 361 |
| M579T598_1 | 578. 7720228 | 598. 341 | 3679441. 665 |
| M579T556_1 | 578. 7689349 | 555. 524 | 6609990. 381 |
| M579T556_2 | 578. 7821546 | 555. 524 | 7454911. 945 |
| M579T452   | 579. 1718116 | 451. 616 | 2427857. 702 |
| M579T106   | 579. 1751272 | 105. 537 | 5321011. 583 |
| M579T396   | 579. 1914757 | 396. 023 | 3646549. 264 |
| M579T384   | 579. 1913186 | 383. 727 | 1201764. 492 |
| M579T407   | 579. 1912908 | 406. 813 | 967520. 7266 |
| M579T415   | 579. 2379925 | 414. 571 | 639631. 4694 |
| M579T517   | 579. 2582141 | 516. 908 | 1024920. 662 |

|            |              |          |              |
|------------|--------------|----------|--------------|
| M579T598_2 | 579. 2700923 | 598. 341 | 1070205. 23  |
| M579T494   | 579. 2644361 | 493. 56  | 469486. 8445 |
| M579T556_3 | 579. 2776884 | 555. 524 | 3858158. 053 |
| M579T598_3 | 579. 2843507 | 598. 341 | 1504548. 259 |
| M580T674_1 | 579. 7741363 | 673. 771 | 418875. 9955 |
| M580T674_2 | 579. 7862875 | 673. 771 | 352486. 7557 |
| M580T68    | 579. 9989455 | 67. 6441 | 82328. 9679  |
| M580T170   | 580. 167919  | 170. 049 | 987247. 4559 |
| M580T396_1 | 580. 1875853 | 396. 023 | 641223. 7379 |
| M580T396_2 | 580. 2020918 | 396. 023 | 402936. 9893 |
| M580T674_3 | 580. 2748964 | 673. 771 | 299474. 6547 |
| M580T515   | 580. 2755688 | 515. 338 | 306694. 5442 |
| M580T811   | 580. 3559617 | 811. 292 | 1300420. 518 |
| M581T498   | 581. 1338166 | 498. 202 | 404476. 9856 |
| M581T532   | 581. 1799708 | 532. 372 | 1947634. 666 |
| M581T425   | 581. 2134624 | 425. 439 | 316646. 622  |
| M581T484_1 | 581. 2159988 | 484. 221 | 2318365. 751 |
| M581T484_2 | 581. 2292798 | 484. 221 | 1897285. 921 |
| M581T461   | 581. 2795698 | 460. 89  | 349775. 9771 |
| M581T811   | 581. 3593925 | 811. 292 | 176009. 5278 |
| M581T835   | 581. 4813408 | 835. 329 | 213296. 2897 |
| M582T532   | 582. 1760409 | 532. 372 | 853288. 8177 |
| M583T817   | 582. 9362144 | 817. 214 | 3772202. 362 |
| M583T816   | 582. 9512357 | 815. 664 | 3798729. 054 |
| M583T83    | 583. 1215839 | 82. 8986 | 4477417. 701 |
| M583T388   | 583. 1584787 | 388. 326 | 382648. 5907 |
| M583T444   | 583. 1984812 | 443. 961 | 2714166. 018 |
| M583T584_1 | 583. 2764349 | 584. 484 | 1870796. 376 |
| M583T584_2 | 583. 2913687 | 584. 484 | 2274656. 927 |
| M584T595   | 583. 7809683 | 595. 35  | 309788. 4839 |
| M584T584   | 583. 7806213 | 584. 484 | 1101809. 193 |
| M584T504_1 | 584. 189977  | 504. 432 | 794356. 0233 |
| M584T532   | 584. 1918389 | 532. 372 | 928909. 1339 |
| M584T444   | 584. 2018003 | 443. 961 | 826640. 1911 |
| M584T504_2 | 584. 2069214 | 504. 432 | 294059. 9958 |
| M584T617   | 584. 2684897 | 616. 891 | 1431162. 943 |
| M584T566   | 584. 2887355 | 566. 042 | 1685967. 721 |
| M584T674_1 | 584. 2887449 | 673. 771 | 56480500. 3  |
| M584T674_2 | 584. 3038141 | 673. 771 | 28853005. 25 |
| M585T617   | 584. 7709426 | 616. 891 | 847116. 7316 |
| M585T615   | 584. 7836581 | 615. 38  | 623872. 4964 |
| M585T674_1 | 584. 7879944 | 673. 771 | 29846587. 95 |
| M585T566   | 584. 7907186 | 566. 042 | 1059255. 164 |
| M585T575   | 584. 7910719 | 575. 222 | 761024. 629  |
| M585T584   | 584. 7913128 | 584. 484 | 326645. 2826 |
| M585T674_2 | 584. 8014053 | 673. 771 | 26176162. 92 |
| M585T68    | 585. 0896833 | 67. 6441 | 197065. 8855 |
| M585T428   | 585. 1971598 | 428. 448 | 100083. 7718 |
| M585T622   | 585. 2069883 | 621. 547 | 507884. 9801 |
| M585T452   | 585. 21775   | 451. 616 | 1527811. 504 |
| M585T495   | 585. 2611645 | 495. 125 | 2821196. 269 |
| M585T674_3 | 585. 2914393 | 673. 771 | 13170383. 12 |
| M585T577   | 585. 3022907 | 576. 787 | 588928. 1667 |
| M585T674_4 | 585. 3048694 | 673. 771 | 7447551. 492 |

|            |              |          |              |
|------------|--------------|----------|--------------|
| M585T826_1 | 585. 3399884 | 826. 333 | 8039532. 051 |
| M585T826_2 | 585. 3550719 | 826. 333 | 12375739. 6  |
| M586T495   | 585. 7588918 | 495. 125 | 828416. 9542 |
| M586T494   | 585. 7716293 | 493. 56  | 960921. 4596 |
| M586T600   | 585. 7963226 | 599. 904 | 765429. 7756 |
| M586T446   | 586. 1712947 | 445. 522 | 1029138. 002 |
| M586T542_1 | 586. 2694012 | 541. 673 | 3706862. 136 |
| M586T542_2 | 586. 2868555 | 541. 673 | 281894. 8026 |
| M586T674   | 586. 292985  | 673. 771 | 1014507. 881 |
| M586T778   | 586. 3231975 | 777. 92  | 2595189. 627 |
| M586T804   | 586. 3233538 | 803. 615 | 5635937. 316 |
| M586T835   | 586. 326784  | 835. 329 | 3846760. 723 |
| M586T826   | 586. 3496235 | 826. 333 | 3868977. 62  |
| M587T77    | 586. 8353773 | 77. 2263 | 4881278. 051 |
| M587T124   | 587. 107776  | 123. 792 | 4416813. 629 |
| M587T117   | 587. 1210563 | 116. 52  | 974694. 7278 |
| M587T68    | 587. 1423571 | 67. 6441 | 1188380. 3   |
| M587T69    | 587. 1557453 | 69. 1983 | 208198. 1513 |
| M587T446   | 587. 1759029 | 445. 522 | 200229. 9177 |
| M587T314   | 587. 2197109 | 313. 612 | 4356102. 531 |
| M587T583   | 587. 2265395 | 582. 96  | 745053. 4991 |
| M587T629   | 587. 2401256 | 629. 272 | 515444. 5348 |
| M587T494   | 587. 3045037 | 493. 56  | 287741. 0717 |
| M587T835   | 587. 4382435 | 835. 329 | 2953243. 187 |
| M588T68    | 588. 1453344 | 67. 6441 | 129407. 5625 |
| M588T772   | 588. 1995319 | 771. 785 | 1816828. 633 |
| M588T338   | 588. 2083198 | 338. 222 | 358193. 7059 |
| M588T837   | 588. 3283413 | 836. 769 | 1846793. 111 |
| M588T826   | 588. 3281108 | 826. 333 | 1844487. 817 |
| M588T724   | 588. 3281031 | 724. 158 | 715892. 4982 |
| M588T766   | 588. 3280193 | 765. 588 | 1705989. 41  |
| M588T741   | 588. 3281137 | 741. 077 | 869867. 0787 |
| M588T779   | 588. 3282857 | 779. 407 | 1896764. 273 |
| M588T834   | 588. 4432182 | 833. 866 | 1329126. 046 |
| M589T242   | 589. 1751342 | 242. 223 | 1176075. 075 |
| M589T668   | 589. 222547  | 667. 612 | 1981243. 959 |
| M589T642_1 | 589. 2224759 | 641. 603 | 5152567. 383 |
| M589T698_1 | 589. 2224953 | 698. 034 | 1951317. 075 |
| M589T583   | 589. 2256642 | 582. 96  | 3516950. 267 |
| M589T642_2 | 589. 2337677 | 641. 603 | 4731804. 097 |
| M589T698_2 | 589. 235709  | 698. 034 | 1054008. 912 |
| M589T581   | 589. 2408817 | 581. 442 | 724873. 5334 |
| M589T649   | 589. 2661287 | 649. 195 | 3244734. 817 |
| M589T693   | 589. 2800185 | 692. 781 | 1136945. 786 |
| M589T713_1 | 589. 2834044 | 713. 292 | 2446011. 15  |
| M589T694   | 589. 293705  | 694. 341 | 402934. 2785 |
| M589T713_2 | 589. 2945842 | 713. 292 | 928005. 27   |
| M589T823   | 589. 3310268 | 823. 375 | 616693. 1196 |
| M590T649_1 | 589. 7778432 | 649. 195 | 1589475. 409 |
| M590T729_1 | 590. 2086263 | 728. 711 | 3276310. 798 |
| M590T770_1 | 590. 2078583 | 770. 235 | 5015611. 713 |
| M590T729_2 | 590. 2206075 | 728. 711 | 12834427. 13 |
| M590T770_2 | 590. 2206662 | 770. 235 | 33645330. 54 |
| M590T747   | 590. 220666  | 747. 194 | 3244021. 198 |



|            |              |          |              |
|------------|--------------|----------|--------------|
| M590T669   | 590. 227671  | 669. 12  | 1057083. 473 |
| M590T583   | 590. 226769  | 582. 96  | 814663. 1631 |
| M590T640   | 590. 2306853 | 640. 057 | 1017756. 187 |
| M590T749   | 590. 2341966 | 748. 742 | 1162736. 771 |
| M590T729_3 | 590. 2353181 | 728. 711 | 4294526. 128 |
| M590T770_3 | 590. 2341152 | 770. 235 | 12036658. 74 |
| M590T649_2 | 590. 265312  | 649. 195 | 2521427. 696 |
| M590T461_1 | 590. 2784567 | 460. 89  | 3075925. 546 |
| M590T494   | 590. 2955112 | 493. 56  | 1130136. 057 |
| M590T713   | 590. 288737  | 713. 292 | 1673597. 848 |
| M590T461_2 | 590. 2897307 | 460. 89  | 1558065. 744 |
| M591T718   | 590. 7893553 | 717. 942 | 820319. 225  |
| M591T306   | 591. 1776    | 306. 164 | 2795865. 78  |
| M591T106   | 591. 1774195 | 105. 537 | 5024132. 266 |
| M591T297   | 591. 1773113 | 297. 149 | 999904. 763  |
| M591T608   | 591. 202514  | 607. 625 | 116774. 2189 |
| M591T770   | 591. 2211356 | 770. 235 | 8784881. 439 |
| M591T749   | 591. 2324705 | 748. 742 | 580361. 9145 |
| M591T729   | 591. 2281541 | 728. 711 | 3705154. 414 |
| M591T810   | 591. 2352264 | 809. 797 | 2922891. 194 |
| M591T458   | 591. 2715314 | 457. 763 | 500397. 8546 |
| M591T697_1 | 591. 2924317 | 697. 061 | 2810725. 114 |
| M591T461   | 591. 2864224 | 460. 89  | 929806. 5827 |
| M591T635_1 | 591. 2931402 | 635. 37  | 26582672. 01 |
| M591T677   | 591. 2966662 | 676. 878 | 1289572. 52  |
| M591T697_2 | 591. 3034342 | 697. 061 | 3702720. 105 |
| M591T635_2 | 591. 3067774 | 635. 37  | 29932866. 48 |
| M591T408   | 591. 3238153 | 408. 368 | 226904. 3138 |
| M592T635_1 | 591. 7912281 | 635. 37  | 8827995. 161 |
| M592T696   | 591. 7936724 | 695. 893 | 1424627. 052 |
| M592T635_2 | 591. 8014691 | 635. 37  | 24005299. 18 |
| M592T635_3 | 591. 8117105 | 635. 37  | 11584740. 75 |
| M592T372   | 592. 1978231 | 371. 633 | 412617. 5037 |
| M592T93_1  | 592. 2010668 | 92. 9618 | 29420118. 72 |
| M592T93_2  | 592. 2168453 | 92. 9618 | 17423749. 96 |
| M592T772   | 592. 2228973 | 771. 785 | 3696468. 609 |
| M592T594_1 | 592. 2559377 | 593. 841 | 1462579. 846 |
| M592T594_2 | 592. 2736731 | 593. 841 | 737223. 3107 |
| M592T598   | 592. 2897106 | 598. 341 | 839000. 9197 |
| M592T523_1 | 592. 2867117 | 523. 055 | 3438119. 029 |
| M592T511_1 | 592. 2865471 | 510. 673 | 10018206. 34 |
| M592T534_1 | 592. 2866072 | 533. 931 | 5214961. 032 |
| M592T503   | 592. 2864612 | 502. 873 | 5831656. 516 |
| M592T635_4 | 592. 2967386 | 635. 37  | 6636534. 059 |
| M592T523_2 | 592. 2992796 | 523. 055 | 1588260. 701 |
| M592T534_2 | 592. 2968607 | 533. 931 | 3813599. 115 |
| M592T511_2 | 592. 3013467 | 510. 673 | 4776895. 461 |
| M592T635_5 | 592. 3149584 | 635. 37  | 2052789. 339 |
| M592T779   | 592. 3585427 | 779. 407 | 7102426. 162 |
| M593T534   | 592. 7812996 | 533. 931 | 1605823. 059 |
| M593T635   | 592. 7992334 | 635. 37  | 2173481. 021 |
| M593T678   | 593. 1180384 | 678. 416 | 951368. 496  |
| M593T124   | 593. 1521443 | 123. 792 | 1370105. 879 |
| M593T185   | 593. 1657761 | 185. 252 | 975094. 2587 |

|            |              |          |              |
|------------|--------------|----------|--------------|
| M593T452   | 593. 1620408 | 451. 616 | 694021. 7965 |
| M593T352   | 593. 169143  | 351. 663 | 4893110. 782 |
| M593T385_1 | 593. 1692478 | 385. 225 | 8972104. 791 |
| M593T106_1 | 593. 1862602 | 105. 537 | 17512010. 96 |
| M593T98_1  | 593. 1865963 | 97. 682  | 23283715. 8  |
| M593T385_2 | 593. 1799221 | 385. 225 | 4802470. 338 |
| M593T526   | 593. 196774  | 526. 124 | 923231. 8541 |
| M593T121   | 593. 2050388 | 120. 945 | 842122. 1293 |
| M593T106_2 | 593. 1991525 | 105. 537 | 13677409. 97 |
| M593T98_2  | 593. 1989559 | 97. 682  | 20678281. 12 |
| M593T640   | 593. 2726476 | 640. 057 | 421231. 8058 |
| M593T557   | 593. 2755708 | 557. 078 | 451273. 635  |
| M593T548   | 593. 2756515 | 547. 805 | 554610. 4401 |
| M593T531   | 593. 3005098 | 530. 804 | 3089491. 028 |
| M593T542   | 593. 2993203 | 541. 673 | 2267300. 397 |
| M594T504   | 593. 7592732 | 504. 432 | 261975. 3122 |
| M594T531   | 593. 7931676 | 530. 804 | 1250764. 744 |
| M594T678_1 | 594. 1263984 | 678. 416 | 591564. 6132 |
| M594T678_2 | 594. 1398507 | 678. 416 | 370851. 9156 |
| M594T218_1 | 594. 1433154 | 218. 43  | 499772. 9403 |
| M594T203   | 594. 1536129 | 203. 346 | 901493. 1754 |
| M594T218_2 | 594. 1569834 | 218. 43  | 520078. 0765 |
| M594T385   | 594. 1742125 | 385. 225 | 2428100. 263 |
| M594T106   | 594. 190739  | 105. 537 | 3169088. 789 |
| M594T730   | 594. 231254  | 730. 264 | 931275. 4243 |
| M594T484   | 594. 266986  | 484. 221 | 605021. 0687 |
| M594T517   | 594. 2777194 | 516. 908 | 377088. 6907 |
| M594T648_1 | 594. 270703  | 647. 653 | 7179313. 957 |
| M594T529   | 594. 2841776 | 529. 248 | 199052. 9824 |
| M594T648_2 | 594. 2883887 | 647. 653 | 22261631. 6  |
| M595T649_1 | 594. 7752215 | 649. 195 | 6600947. 609 |
| M595T649_2 | 594. 790475  | 649. 195 | 15407396. 64 |
| M595T504   | 595. 1146709 | 504. 432 | 131173. 3336 |
| M595T475_1 | 595. 1128461 | 474. 888 | 11743104. 25 |
| M595T475_2 | 595. 130043  | 474. 888 | 41887866. 24 |
| M595T509   | 595. 1405223 | 509. 11  | 339576. 6161 |
| M595T475_3 | 595. 1438103 | 474. 888 | 13717119. 07 |
| M595T427   | 595. 1611071 | 426. 913 | 7214047. 657 |
| M595T503   | 595. 1638624 | 502. 873 | 2385380. 45  |
| M595T687_1 | 595. 1852187 | 687. 214 | 873575. 0982 |
| M595T706   | 595. 2071451 | 705. 593 | 520577. 9124 |
| M595T687_2 | 595. 2024397 | 687. 214 | 696078. 8355 |
| M595T648   | 595. 2854329 | 647. 653 | 12939553. 32 |
| M595T498   | 595. 295418  | 498. 202 | 351513. 3612 |
| M595T571_1 | 595. 2983274 | 570. 599 | 3465086. 585 |
| M595T571_2 | 595. 3119992 | 570. 599 | 1965577. 293 |
| M595T835_1 | 595. 4855218 | 835. 329 | 962005. 1773 |
| M595T835_2 | 595. 4996179 | 835. 329 | 1392245. 499 |
| M596T649_1 | 595. 7934435 | 649. 195 | 3891585. 339 |
| M596T571_1 | 595. 7984194 | 570. 599 | 2303779. 846 |
| M596T571_2 | 595. 8121466 | 570. 599 | 1859890. 207 |
| M596T475_1 | 596. 1226188 | 474. 888 | 5936753. 247 |
| M596T475_2 | 596. 1398715 | 474. 888 | 7334916. 249 |
| M596T425   | 596. 1638403 | 425. 439 | 1985391. 938 |

|            |              |          |              |
|------------|--------------|----------|--------------|
| M596T427   | 596. 1777101 | 426. 913 | 1055120. 277 |
| M596T396   | 596. 1782385 | 396. 023 | 772140. 9888 |
| M596T384   | 596. 1758217 | 383. 727 | 458548. 3227 |
| M596T622   | 596. 2079836 | 621. 547 | 520390. 2007 |
| M596T297   | 596. 225606  | 297. 149 | 1040856. 367 |
| M596T312   | 596. 2262482 | 312. 058 | 1746220. 198 |
| M596T305   | 596. 2331678 | 304. 743 | 991597. 6552 |
| M596T740_1 | 596. 2299428 | 739. 509 | 765512. 7532 |
| M596T740_2 | 596. 2404582 | 739. 509 | 496150. 1082 |
| M596T517   | 596. 2509091 | 516. 908 | 610975. 9532 |
| M596T649_2 | 596. 2850922 | 649. 195 | 1474193. 124 |
| M596T835   | 596. 4992686 | 835. 329 | 554308. 1139 |
| M597T475_1 | 597. 1281562 | 474. 888 | 2253407. 863 |
| M597T475_2 | 597. 1438879 | 474. 888 | 1168869. 283 |
| M597T401_1 | 597. 1734068 | 400. 641 | 584824. 7818 |
| M597T401_2 | 597. 1871747 | 400. 641 | 276329. 8679 |
| M597T486   | 597. 214843  | 485. 784 | 792443. 3459 |
| M597T598_1 | 597. 2874906 | 598. 341 | 16404322. 91 |
| M597T626_1 | 597. 2858831 | 626. 183 | 21009306. 67 |
| M597T683   | 597. 2950556 | 682. 948 | 2404419. 391 |
| M597T598_2 | 597. 297871  | 598. 341 | 62201717. 91 |
| M597T626_2 | 597. 2979967 | 626. 183 | 78556451. 21 |
| M597T626_3 | 597. 3135274 | 626. 183 | 28691481. 64 |
| M597T597   | 597. 3138372 | 596. 795 | 17970988. 45 |
| M597T684   | 597. 3083346 | 684. 499 | 1856484. 871 |
| M598T598_1 | 597. 7862047 | 598. 341 | 11715568. 92 |
| M598T626_1 | 597. 7863547 | 626. 183 | 14053921. 16 |
| M598T684_1 | 597. 7954885 | 684. 499 | 2026485. 659 |
| M598T598_2 | 597. 7966122 | 598. 341 | 33753156. 34 |
| M598T626_2 | 597. 7967506 | 626. 183 | 39366510. 31 |
| M598T612   | 597. 7967755 | 612. 3   | 3953088. 391 |
| M598T683   | 597. 8103829 | 682. 948 | 1246820. 869 |
| M598T598_3 | 597. 8104712 | 598. 341 | 24634722. 9  |
| M598T626_3 | 597. 8106123 | 626. 183 | 27885157. 88 |
| M598T473   | 598. 1328459 | 473. 329 | 378877. 3537 |
| M598T147_1 | 598. 1703552 | 147. 455 | 4956606. 552 |
| M598T273_1 | 598. 1696822 | 273. 232 | 1562512. 291 |
| M598T211_1 | 598. 170098  | 210. 883 | 9264937. 987 |
| M598T223_1 | 598. 1750575 | 222. 943 | 6254297. 273 |
| M598T107_1 | 598. 1753165 | 106. 648 | 23767830. 53 |
| M598T161_1 | 598. 1754103 | 161. 184 | 3892166. 918 |
| M598T173_1 | 598. 1750544 | 173. 092 | 7564025. 294 |
| M598T185_1 | 598. 1745034 | 185. 252 | 33455011. 05 |
| M598T290_1 | 598. 1813339 | 289. 534 | 2526213. 699 |
| M598T261   | 598. 1815014 | 261. 138 | 5671581. 092 |
| M598T273_2 | 598. 181509  | 273. 232 | 5455135. 197 |
| M598T147_2 | 598. 1915093 | 147. 455 | 5997260. 583 |
| M598T290_2 | 598. 1938015 | 289. 534 | 1395580. 526 |
| M598T223_2 | 598. 1931541 | 222. 943 | 6652865. 896 |
| M598T107_2 | 598. 1934135 | 106. 648 | 23887909. 72 |
| M598T274   | 598. 1952207 | 273. 82  | 1791948. 952 |
| M598T161_2 | 598. 1933036 | 161. 184 | 3567264. 702 |
| M598T173_2 | 598. 1933715 | 173. 092 | 7620730. 184 |
| M598T185_2 | 598. 1935822 | 185. 252 | 40336755. 96 |

|            |             |         |             |
|------------|-------------|---------|-------------|
| M598T211_2 | 598.1936233 | 210.883 | 10826525.28 |
| M598T638_1 | 598.2769905 | 638.484 | 19801812.89 |
| M598T665_1 | 598.2890568 | 664.565 | 8567048.584 |
| M598T694   | 598.2889906 | 694.341 | 2282323.315 |
| M598T684_2 | 598.2893329 | 684.499 | 2734390.185 |
| M598T625   | 598.2962471 | 624.642 | 12662346.49 |
| M598T592   | 598.296031  | 592.284 | 19366211.83 |
| M598T638_2 | 598.2891353 | 638.484 | 52917621.65 |
| M598T665_2 | 598.301667  | 664.565 | 3699452.155 |
| M598T677   | 598.2999795 | 676.878 | 910436.1041 |
| M598T638_3 | 598.3011083 | 638.484 | 28036996.66 |
| M598T626_4 | 598.3101801 | 626.183 | 13356267.75 |
| M598T598_4 | 598.3134233 | 598.341 | 6486028.928 |
| M599T223_1 | 598.678166  | 222.943 | 3629074.505 |
| M599T107_1 | 598.6779787 | 106.648 | 11677235.94 |
| M599T149   | 598.6789246 | 148.981 | 3251660.895 |
| M599T161_1 | 598.6792768 | 161.184 | 2384964.981 |
| M599T173_1 | 598.6782379 | 173.092 | 4082421.715 |
| M599T185_1 | 598.6779779 | 185.252 | 20697439.61 |
| M599T211_1 | 598.6779652 | 210.883 | 6150996.898 |
| M599T268   | 598.6815677 | 268.419 | 1654224.33  |
| M599T273_1 | 598.6813201 | 273.232 | 2613766.782 |
| M599T262   | 598.681652  | 262.302 | 2096369.22  |
| M599T223_2 | 598.6918888 | 222.943 | 4158554.652 |
| M599T107_2 | 598.6918875 | 106.648 | 13916149.83 |
| M599T161_2 | 598.6918254 | 161.184 | 2247289.915 |
| M599T173_2 | 598.6918561 | 173.092 | 4402723.953 |
| M599T185_2 | 598.6918723 | 185.252 | 24554158.69 |
| M599T146   | 598.6918771 | 146.08  | 1698249.394 |
| M599T211_2 | 598.6918583 | 210.883 | 7038430.823 |
| M599T273_2 | 598.6952105 | 273.232 | 1365772.624 |
| M599T684_1 | 598.785249  | 684.499 | 1485674.986 |
| M599T640   | 598.7854995 | 640.057 | 28077130.04 |
| M599T665_1 | 598.7856298 | 664.565 | 4595751.918 |
| M599T694   | 598.785537  | 694.341 | 1119006.791 |
| M599T638   | 598.7994119 | 638.484 | 21919927.94 |
| M599T665_2 | 598.7995193 | 664.565 | 3717743.819 |
| M599T598   | 598.8066735 | 598.341 | 5079035.982 |
| M599T625   | 598.8101763 | 624.642 | 4377232.293 |
| M599T649_1 | 598.8238698 | 649.195 | 7224074.63  |
| M599T822   | 598.9144358 | 821.831 | 5184069.909 |
| M599T107_3 | 599.1813192 | 106.648 | 5861939.322 |
| M599T223_3 | 599.1855076 | 222.943 | 1891034.496 |
| M599T185_3 | 599.1853888 | 185.252 | 11930351.57 |
| M599T273_3 | 599.1856133 | 273.232 | 2988989.617 |
| M599T211_3 | 599.1848191 | 210.883 | 3457082.319 |
| M599T107_4 | 599.195021  | 106.648 | 4797520.598 |
| M599T185_4 | 599.1968119 | 185.252 | 6286444.416 |
| M599T211_4 | 599.1975642 | 210.883 | 1460168.444 |
| M599T549_1 | 599.2685419 | 549.371 | 4069246.569 |
| M599T476   | 599.2759447 | 476.451 | 792232.8814 |
| M599T648   | 599.287284  | 647.653 | 875100813   |
| M599T549_2 | 599.2859394 | 549.371 | 7966279.232 |
| M599T515_1 | 599.2933499 | 515.338 | 10723026.21 |

|            |              |          |              |
|------------|--------------|----------|--------------|
| M599T684_2 | 599. 2898249 | 684. 499 | 4652412. 935 |
| M599T649_2 | 599. 3013093 | 649. 195 | 2225711660   |
| M599T515_2 | 599. 3072626 | 515. 338 | 6270311. 505 |
| M599T805   | 599. 3070567 | 805. 145 | 962889. 7525 |
| M599T684_3 | 599. 3013918 | 684. 499 | 6699627. 743 |
| M599T649_3 | 599. 3142336 | 649. 195 | 557564496. 7 |
| M599T626   | 599. 3106079 | 626. 183 | 5926964. 099 |
| M599T684_4 | 599. 313797  | 684. 499 | 1601339. 579 |
| M600T185_1 | 599. 6831199 | 185. 252 | 2905754. 689 |
| M600T185_2 | 599. 6970495 | 185. 252 | 1933086. 565 |
| M600T649_1 | 599. 7887949 | 649. 195 | 634331336. 3 |
| M600T549_1 | 599. 7872316 | 549. 371 | 4993636. 552 |
| M600T684_1 | 599. 7882074 | 684. 499 | 5871404. 405 |
| M600T649_2 | 599. 801723  | 649. 195 | 1432814061   |
| M600T523   | 599. 8050439 | 523. 055 | 2764280. 666 |
| M600T515   | 599. 8049972 | 515. 338 | 5912732. 785 |
| M600T684_2 | 599. 8015564 | 684. 499 | 3834536. 833 |
| M600T649_3 | 599. 813784  | 649. 195 | 332804626. 7 |
| M600T684_3 | 599. 8137216 | 684. 499 | 1046012. 822 |
| M600T444   | 600. 1909031 | 443. 961 | 1280234. 879 |
| M600T490   | 600. 1987189 | 490. 434 | 298200. 65   |
| M600T106   | 600. 2051198 | 105. 537 | 7586286. 447 |
| M600T146   | 600. 2056723 | 146. 08  | 3413444. 894 |
| M600T107   | 600. 2192945 | 106. 648 | 7888367. 639 |
| M600T549_2 | 600. 272008  | 549. 371 | 925557. 7853 |
| M600T671_1 | 600. 2930585 | 670. 674 | 8344970. 679 |
| M600T648_1 | 600. 2966262 | 647. 653 | 536713805. 6 |
| M600T671_2 | 600. 306968  | 670. 674 | 15188686. 73 |
| M600T648_2 | 600. 3133747 | 647. 653 | 168866447    |
| M601T566   | 600. 7848134 | 566. 042 | 2236306. 033 |
| M601T671_1 | 600. 7954746 | 670. 674 | 3381980. 138 |
| M601T648_1 | 600. 7962967 | 647. 653 | 136003808. 3 |
| M601T671_2 | 600. 8094348 | 670. 674 | 4656343. 475 |
| M601T649_1 | 600. 8089393 | 649. 195 | 120075846. 5 |
| M601T122   | 601. 1338757 | 122. 381 | 3418466. 36  |
| M601T370_1 | 601. 1897974 | 370. 115 | 691502. 0364 |
| M601T334   | 601. 1972314 | 333. 655 | 883478. 3362 |
| M601T370_2 | 601. 2032883 | 370. 115 | 581969. 6031 |
| M601T591_1 | 601. 2780628 | 590. 717 | 1700644. 296 |
| M601T591_2 | 601. 2917935 | 590. 717 | 1675714. 172 |
| M601T648_2 | 601. 2996674 | 647. 653 | 32789463. 73 |
| M601T422   | 601. 3089477 | 422. 362 | 305162. 4139 |
| M601T649_2 | 601. 3163098 | 649. 195 | 8073981. 645 |
| M602T649_1 | 601. 796128  | 649. 195 | 6089167. 763 |
| M602T649_2 | 601. 8097731 | 649. 195 | 7292340. 978 |
| M602T335_1 | 602. 1215087 | 335. 153 | 273414. 4836 |
| M602T335_2 | 602. 1957338 | 335. 153 | 164383. 4742 |
| M602T107   | 602. 2259382 | 106. 648 | 2186582. 467 |
| M602T173   | 602. 2260603 | 173. 092 | 9123259. 93  |
| M602T649_3 | 602. 2992033 | 649. 195 | 1739210. 516 |
| M603T648   | 602. 7710023 | 647. 653 | 2691228. 049 |
| M603T649_1 | 602. 7845847 | 649. 195 | 2965827. 877 |
| M603T489   | 603. 2175718 | 488. 885 | 1189873. 124 |
| M603T525_1 | 603. 2109271 | 524. 56  | 2456335. 611 |

|            |              |          |              |
|------------|--------------|----------|--------------|
| M603T537   | 603. 2183756 | 537. 051 | 1113041. 914 |
| M603T173   | 603. 2295702 | 173. 092 | 2014732. 826 |
| M603T525_2 | 603. 2226194 | 524. 56  | 15037818. 24 |
| M603T372   | 603. 2364681 | 371. 633 | 213893. 2093 |
| M603T525_3 | 603. 2401302 | 524. 56  | 5215987. 004 |
| M603T595   | 603. 2611326 | 595. 35  | 174112. 4776 |
| M603T649_2 | 603. 2883673 | 649. 195 | 1485731. 735 |
| M604T649   | 603. 7736158 | 649. 195 | 2194005. 81  |
| M604T102_1 | 604. 1998503 | 101. 563 | 8600885. 278 |
| M604T93_1  | 604. 2001176 | 92. 9618 | 25531287. 92 |
| M604T102_2 | 604. 2139134 | 101. 563 | 8699284. 355 |
| M604T93_2  | 604. 2147705 | 92. 9618 | 27266486. 31 |
| M604T525_1 | 604. 2222031 | 524. 56  | 4015184. 206 |
| M604T537   | 604. 2351636 | 537. 051 | 663059. 3169 |
| M604T525_2 | 604. 2354742 | 524. 56  | 4821655. 512 |
| M605T500_1 | 605. 1662843 | 499. 759 | 1402719. 462 |
| M605T509_1 | 605. 1662894 | 509. 11  | 1681223. 231 |
| M605T500_2 | 605. 1795051 | 499. 759 | 744807. 6695 |
| M605T509_2 | 605. 1792332 | 509. 11  | 1033685. 56  |
| M605T187_1 | 605. 1872877 | 186. 689 | 3534528. 455 |
| M605T320   | 605. 1875703 | 319. 785 | 5993545. 331 |
| M605T312   | 605. 1876533 | 312. 058 | 4835260. 028 |
| M605T187_2 | 605. 2007254 | 186. 689 | 1836802. 052 |
| M605T318   | 605. 2015153 | 318. 232 | 6202747. 725 |
| M605T462   | 605. 2086419 | 462. 446 | 204705. 9882 |
| M605T622_1 | 605. 2157596 | 621. 547 | 3720317. 114 |
| M605T572   | 605. 2228604 | 572. 152 | 1348049. 213 |
| M605T704   | 605. 222839  | 704. 046 | 4154816. 934 |
| M605T622_2 | 605. 2307504 | 621. 547 | 3243259. 604 |
| M605T509_3 | 605. 2407442 | 509. 11  | 1066071. 262 |
| M605T525   | 605. 2465115 | 524. 56  | 3342928. 932 |
| M605T529   | 605. 2781564 | 529. 248 | 748314. 3135 |
| M605T580   | 605. 2843921 | 579. 883 | 1275136. 719 |
| M606T332_1 | 606. 1876978 | 332. 105 | 196475. 5373 |
| M606T320_1 | 606. 1872245 | 319. 785 | 1086288. 849 |
| M606T312_1 | 606. 1878082 | 312. 058 | 820856. 083  |
| M606T332_2 | 606. 201795  | 332. 105 | 218505. 5515 |
| M606T320_2 | 606. 2013709 | 319. 785 | 1193781. 933 |
| M606T312_2 | 606. 2017063 | 312. 058 | 899445. 5502 |
| M606T709_1 | 606. 2160777 | 708. 697 | 5342301. 858 |
| M606T651   | 606. 2126246 | 650. 74  | 3005490. 512 |
| M606T583   | 606. 2138656 | 582. 96  | 1104083. 907 |
| M606T658   | 606. 2124156 | 658. 372 | 2216100. 263 |
| M606T698   | 606. 2156035 | 698. 034 | 2665012. 19  |
| M606T640_1 | 606. 216024  | 640. 057 | 6752956. 791 |
| M606T735_1 | 606. 2162951 | 734. 901 | 5271686. 34  |
| M606T622   | 606. 2234821 | 621. 547 | 1629438. 201 |
| M606T709_2 | 606. 2282568 | 708. 697 | 3578346. 836 |
| M606T640_2 | 606. 231667  | 640. 057 | 2010578. 373 |
| M606T735_2 | 606. 2291902 | 734. 901 | 2317410. 264 |
| M606T526   | 606. 2436882 | 526. 124 | 960352. 4046 |
| M606T545_1 | 606. 2763569 | 544. 759 | 3956243. 806 |
| M606T568   | 606. 2835395 | 567. 543 | 1925860. 792 |
| M606T584_1 | 606. 2833199 | 584. 484 | 33797897. 8  |

|            |              |          |              |
|------------|--------------|----------|--------------|
| M606T545_2 | 606. 2940543 | 544. 759 | 7879319. 405 |
| M606T584_2 | 606. 3045346 | 584. 484 | 8991458. 279 |
| M607T545_1 | 606. 7863835 | 544. 759 | 6752319. 774 |
| M607T568_1 | 606. 7827977 | 567. 543 | 832113. 8619 |
| M607T584_1 | 606. 7825997 | 584. 484 | 17007736. 95 |
| M607T545_2 | 606. 7970111 | 544. 759 | 4799294. 97  |
| M607T568_2 | 606. 7934309 | 567. 543 | 947071. 3738 |
| M607T584_2 | 606. 7932319 | 584. 484 | 20662296. 41 |
| M607T584_3 | 606. 8038552 | 584. 484 | 4244609. 969 |
| M607T106   | 607. 1726973 | 105. 537 | 1087035. 974 |
| M607T709   | 607. 221907  | 708. 697 | 1608748. 591 |
| M607T640   | 607. 2188105 | 640. 057 | 1773512. 951 |
| M607T609_1 | 607. 2809006 | 609. 19  | 1397853. 418 |
| M607T546_1 | 607. 2819063 | 546. 308 | 5013746. 769 |
| M607T566_1 | 607. 2809237 | 566. 042 | 7634930. 822 |
| M607T575_1 | 607. 281066  | 575. 222 | 5978762. 955 |
| M607T643   | 607. 2863254 | 643. 166 | 5350036. 786 |
| M607T495   | 607. 290136  | 495. 125 | 1570689. 262 |
| M607T584_4 | 607. 2897559 | 584. 484 | 14898016. 52 |
| M607T609_2 | 607. 2972429 | 609. 19  | 3893560. 942 |
| M607T546_2 | 607. 293899  | 546. 308 | 6787385. 15  |
| M607T566_2 | 607. 2970795 | 566. 042 | 26861943. 68 |
| M607T575_2 | 607. 2970325 | 575. 222 | 20003041. 29 |
| M607T645   | 607. 3035753 | 644. 722 | 2950124. 718 |
| M607T583   | 607. 3050871 | 582. 96  | 6583539. 633 |
| M608T551   | 607. 7728104 | 550. 932 | 245328. 1614 |
| M608T566_1 | 607. 7834078 | 566. 042 | 6303930. 158 |
| M608T669_1 | 607. 7941086 | 669. 12  | 1028083. 534 |
| M608T609_1 | 607. 7942794 | 609. 19  | 2140102. 581 |
| M608T500   | 607. 7978666 | 499. 759 | 2884393. 903 |
| M608T594   | 607. 7940567 | 593. 841 | 2468718. 255 |
| M608T566_2 | 607. 7941684 | 566. 042 | 13344447. 25 |
| M608T648   | 607. 7942685 | 647. 653 | 11514316. 08 |
| M608T632   | 607. 7940755 | 632. 288 | 2559183. 953 |
| M608T575_1 | 607. 7940649 | 575. 222 | 12344815. 18 |
| M608T584   | 607. 7941308 | 584. 484 | 7004163. 196 |
| M608T669_2 | 607. 804742  | 669. 12  | 624894. 1898 |
| M608T609_2 | 607. 804937  | 609. 19  | 1421667. 632 |
| M608T566_3 | 607. 8048256 | 566. 042 | 9543978. 195 |
| M608T634   | 607. 8048094 | 633. 832 | 1286640. 784 |
| M608T575_2 | 607. 8047233 | 575. 222 | 8700549. 766 |
| M608T296   | 608. 1636522 | 295. 704 | 1122636. 913 |
| M608T170   | 608. 1636993 | 170. 049 | 219242. 5525 |
| M608T675   | 608. 2280336 | 675. 322 | 1665778. 509 |
| M608T534   | 608. 2813431 | 533. 931 | 709397. 7682 |
| M608T649   | 608. 2949767 | 649. 195 | 6678487. 127 |
| M608T566_4 | 608. 2954852 | 566. 042 | 6076259. 187 |
| M608T577   | 608. 2955082 | 576. 787 | 8704925. 282 |
| M608T578   | 608. 3095882 | 578. 353 | 8834647. 331 |
| M609T534   | 608. 7830139 | 533. 931 | 392952. 6938 |
| M609T649   | 608. 797043  | 649. 195 | 2560337. 326 |
| M609T566_1 | 608. 7921171 | 566. 042 | 1268821. 611 |
| M609T577   | 608. 7937075 | 576. 787 | 2274292. 241 |
| M609T578   | 608. 8045707 | 578. 353 | 3695321. 939 |

|            |              |          |              |
|------------|--------------|----------|--------------|
| M609T566_2 | 608. 805399  | 566. 042 | 1498228. 328 |
| M609T503   | 609. 1592354 | 502. 873 | 1611104. 71  |
| M610T65    | 610. 1169041 | 65. 4825 | 44284. 09202 |
| M610T327   | 610. 1950293 | 327. 449 | 1990230. 852 |
| M610T341   | 610. 1954885 | 341. 266 | 1100986. 265 |
| M610T449   | 610. 2169455 | 448. 527 | 251022. 7485 |
| M610T761_1 | 610. 2456713 | 760. 976 | 3032680. 019 |
| M610T694   | 610. 2486996 | 694. 341 | 1896962. 846 |
| M610T761_2 | 610. 2563942 | 760. 976 | 2013911. 137 |
| M611T329   | 611. 1293169 | 328. 999 | 368976. 1567 |
| M611T600   | 611. 2941808 | 599. 904 | 2640446. 089 |
| M611T615   | 611. 326586  | 615. 38  | 312566. 5204 |
| M612T242_1 | 612. 1766501 | 242. 223 | 2872990. 286 |
| M612T299_1 | 612. 1768372 | 298. 619 | 964930. 913  |
| M612T242_2 | 612. 1874239 | 242. 223 | 2240405. 257 |
| M612T299_2 | 612. 1876116 | 298. 619 | 743751. 92   |
| M612T622_1 | 612. 2164804 | 621. 547 | 2682618. 479 |
| M612T622_2 | 612. 2344348 | 621. 547 | 5158450. 047 |
| M612T603_1 | 612. 3027751 | 603. 04  | 2916801. 761 |
| M612T603_2 | 612. 3152231 | 603. 04  | 955713. 6701 |
| M613T242   | 612. 6804281 | 242. 223 | 1583772. 098 |
| M613T603   | 612. 8023801 | 603. 04  | 1639385. 261 |
| M613T669   | 612. 8002312 | 669. 12  | 532041. 2301 |
| M613T75_1  | 613. 0111176 | 74. 6705 | 18100726. 33 |
| M613T75_2  | 613. 0279343 | 74. 6705 | 15115515. 23 |
| M613T79    | 613. 0962451 | 79. 4105 | 13985000. 36 |
| M614T75    | 614. 0191192 | 74. 6705 | 5362555. 025 |
| M614T102_1 | 614. 1856843 | 101. 563 | 15962496. 4  |
| M614T303   | 614. 1894537 | 303. 259 | 309181. 7926 |
| M614T102_2 | 614. 1991843 | 101. 563 | 10481963. 51 |
| M614T598   | 614. 2759183 | 598. 341 | 1300061. 285 |
| M614T549_1 | 614. 2798026 | 549. 371 | 1180077. 695 |
| M614T574   | 614. 2830228 | 573. 704 | 999090. 5278 |
| M614T531   | 614. 2832396 | 530. 804 | 447291. 4747 |
| M614T549_2 | 614. 2908571 | 549. 371 | 982958. 4148 |
| M614T597   | 614. 2902091 | 596. 795 | 957652. 4836 |
| M614T515   | 614. 3014457 | 515. 338 | 580836. 4276 |
| M614T648   | 614. 2977338 | 647. 653 | 1120515. 834 |
| M614T819   | 614. 4566141 | 818. 743 | 8564663. 726 |
| M614T801   | 614. 4600259 | 800. 683 | 5162575. 096 |
| M614T835_1 | 614. 4604618 | 835. 329 | 8728531. 69  |
| M614T779   | 614. 4639707 | 779. 407 | 3685033. 316 |
| M614T817   | 614. 4673903 | 817. 214 | 5746337. 952 |
| M614T835_2 | 614. 4712951 | 835. 329 | 4566808. 112 |
| M615T598_1 | 614. 7780151 | 598. 341 | 681785. 0417 |
| M615T572   | 614. 780854  | 572. 152 | 622258. 36   |
| M615T598_2 | 614. 7906724 | 598. 341 | 409453. 3756 |
| M615T517   | 614. 8006456 | 516. 908 | 304918. 3537 |
| M615T825_1 | 614. 8830908 | 824. 864 | 1555032. 444 |
| M615T825_2 | 614. 893943  | 824. 864 | 1024287. 153 |
| M615T807   | 614. 9465629 | 806. 698 | 1287424. 888 |
| M615T598_3 | 615. 2811302 | 598. 341 | 1084935. 039 |
| M615T683_1 | 615. 2841512 | 682. 948 | 517149. 0913 |
| M615T532   | 615. 2882092 | 532. 372 | 2641865. 561 |



|            |              |           |              |
|------------|--------------|-----------|--------------|
| M615T525_1 | 615. 2877802 | 524. 56   | 1586891. 052 |
| M615T554_1 | 615. 2885076 | 554. 027  | 3027611. 104 |
| M615T683_2 | 615. 296783  | 682. 948  | 254731. 9553 |
| M615T534   | 615. 300039  | 533. 931  | 2754886. 236 |
| M615T525_2 | 615. 3015596 | 524. 56   | 1198544. 949 |
| M615T554_2 | 615. 3002166 | 554. 027  | 2129386. 034 |
| M615T835_1 | 615. 4618833 | 835. 329  | 2863942. 083 |
| M615T835_2 | 615. 4727542 | 835. 329  | 1933479. 534 |
| M616T598   | 615. 783954  | 598. 341  | 644455. 1181 |
| M616T532   | 615. 7911619 | 532. 372  | 5324688. 951 |
| M616T185_1 | 616. 1647439 | 185. 252  | 1254342. 293 |
| M616T274   | 616. 1718328 | 273. 82   | 896121. 5141 |
| M616T263   | 616. 1720997 | 263. 129  | 622525. 5223 |
| M616T185_2 | 616. 1797207 | 185. 252  | 1087193. 273 |
| M616T300   | 616. 2336909 | 300. 176  | 7008500. 046 |
| M616T299_1 | 616. 2445636 | 298. 619  | 15113773. 66 |
| M616T299_2 | 616. 2554209 | 298. 619  | 5189036. 185 |
| M616T649_1 | 616. 2819165 | 649. 195  | 3808312. 361 |
| M616T649_2 | 616. 2962347 | 649. 195  | 2962112. 721 |
| M616T531_1 | 616. 2918238 | 530. 804  | 20110299. 75 |
| M616T542   | 616. 3025153 | 541. 673  | 32278956. 06 |
| M616T531_2 | 616. 3027025 | 530. 804  | 32173088. 61 |
| M617T648_1 | 616. 7817346 | 647. 653  | 2538552. 964 |
| M617T649   | 616. 7954498 | 649. 195  | 2115975. 474 |
| M617T822   | 616. 8546951 | 821. 831  | 491678. 6245 |
| M617T835   | 616. 8545045 | 835. 329  | 490124. 9151 |
| M617T825   | 616. 8794165 | 824. 864  | 989008. 4491 |
| M617T826   | 616. 8911438 | 826. 333  | 529897. 5167 |
| M617T146_1 | 617. 1451015 | 146. 08   | 3593657. 74  |
| M617T270   | 617. 1564307 | 270. 0075 | 579298. 4613 |
| M617T262   | 617. 1555103 | 262. 302  | 613664. 1956 |
| M617T124   | 617. 1568628 | 123. 792  | 3991287. 205 |
| M617T146_2 | 617. 1560098 | 146. 08   | 3256782. 948 |
| M617T185   | 617. 165889  | 185. 252  | 738122. 5346 |
| M617T275   | 617. 1619463 | 274. 794  | 364796. 4763 |
| M617T297   | 617. 1996527 | 297. 149  | 455135. 6265 |
| M617T299   | 617. 2470372 | 298. 619  | 3832321. 87  |
| M617T571   | 617. 2871191 | 570. 599  | 3571328. 876 |
| M617T394_1 | 617. 2904211 | 394. 467  | 1271934. 702 |
| M617T648_2 | 617. 2992021 | 647. 653  | 285321. 5094 |
| M617T394_2 | 617. 3051423 | 394. 467  | 744431. 4695 |
| M618T569   | 617. 7894038 | 569. 091  | 4550637. 808 |
| M618T503   | 617. 8316024 | 502. 873  | 532719. 661  |
| M618T87    | 618. 1897354 | 87. 426   | 754101. 8249 |
| M618T104_1 | 618. 2149847 | 104. 493  | 20251867. 56 |
| M618T104_2 | 618. 225915  | 104. 493  | 29374818. 46 |
| M618T592   | 618. 2965215 | 592. 284  | 517168. 1499 |
| M618T571_1 | 618. 295208  | 570. 599  | 4054792. 687 |
| M618T571_2 | 618. 3138261 | 570. 599  | 3282615. 8   |
| M619T592   | 618. 7877731 | 592. 284  | 786692. 8587 |
| M619T581_1 | 618. 8029166 | 581. 442  | 672224. 3118 |
| M619T571_1 | 618. 802741  | 570. 599  | 2894013. 573 |
| M619T581_2 | 618. 8167246 | 581. 442  | 405841. 6759 |
| M619T571_2 | 618. 8171983 | 570. 599  | 1440326. 059 |

|            |              |          |              |
|------------|--------------|----------|--------------|
| M619T104   | 619. 2262619 | 104. 493 | 7499495. 765 |
| M619T669   | 619. 2594069 | 669. 12  | 550420. 6644 |
| M619T626_1 | 619. 2810901 | 626. 183 | 22680480. 51 |
| M619T645_1 | 619. 2933948 | 644. 722 | 1683106. 564 |
| M619T598_1 | 619. 291894  | 598. 341 | 94228120. 66 |
| M619T626_2 | 619. 2920531 | 626. 183 | 94572144. 61 |
| M619T645_2 | 619. 3080905 | 644. 722 | 6928487. 195 |
| M619T598_2 | 619. 3028564 | 598. 341 | 68135941. 39 |
| M619T626_3 | 619. 3030163 | 626. 183 | 67654215. 77 |
| M620T598_1 | 619. 7873274 | 598. 341 | 45053214. 53 |
| M620T626_1 | 619. 7893094 | 626. 183 | 44487203. 56 |
| M620T598_2 | 619. 8037915 | 598. 341 | 46844945. 68 |
| M620T626_2 | 619. 8039448 | 626. 183 | 46505405. 55 |
| M620T645_1 | 619. 8087472 | 644. 722 | 5648453. 821 |
| M620T525   | 620. 2175456 | 524. 56  | 3966812. 845 |
| M620T107_1 | 620. 2296167 | 106. 648 | 4927546. 247 |
| M620T577   | 620. 2330663 | 576. 787 | 663183. 3047 |
| M620T107_2 | 620. 2437311 | 106. 648 | 7588981. 467 |
| M620T598_3 | 620. 2943498 | 598. 341 | 63160383. 27 |
| M620T683_1 | 620. 2944778 | 682. 948 | 25449559. 33 |
| M620T626_3 | 620. 2945394 | 626. 183 | 75527135. 78 |
| M620T645_2 | 620. 3058592 | 644. 722 | 2798693. 623 |
| M620T598_4 | 620. 3053434 | 598. 341 | 83655871. 41 |
| M620T683_2 | 620. 3091289 | 682. 948 | 31829430. 18 |
| M620T626_4 | 620. 3055296 | 626. 183 | 95073387. 1  |
| M620T598_5 | 620. 3163393 | 598. 341 | 18123210. 66 |
| M620T683_3 | 620. 3201123 | 682. 948 | 3920408. 199 |
| M620T626_5 | 620. 3165093 | 626. 183 | 19795804. 23 |
| M620T622_1 | 620. 3676676 | 621. 547 | 990147. 6164 |
| M620T606_1 | 620. 3674489 | 606. 096 | 1533134. 44  |
| M620T622_2 | 620. 3854469 | 621. 547 | 1343401. 618 |
| M620T606_2 | 620. 3857684 | 606. 096 | 2246470. 507 |
| M621T626_1 | 620. 7894413 | 626. 183 | 12193771. 54 |
| M621T683_1 | 620. 7965837 | 682. 948 | 17952174. 67 |
| M621T598_1 | 620. 8003111 | 598. 341 | 46967887. 95 |
| M621T626_2 | 620. 8004434 | 626. 183 | 54408355. 71 |
| M621T598_2 | 620. 8149843 | 598. 341 | 21131067. 78 |
| M621T683_2 | 620. 8149181 | 682. 948 | 12656483. 99 |
| M621T626_3 | 620. 8151135 | 626. 183 | 24593977. 67 |
| M621T268_1 | 621. 1729659 | 267. 702 | 2492989. 828 |
| M621T273_1 | 621. 1727063 | 273. 232 | 5867813. 556 |
| M621T306_1 | 621. 1730228 | 306. 164 | 318645. 4921 |
| M621T223_1 | 621. 1727547 | 222. 943 | 6596843. 79  |
| M621T185_1 | 621. 1727889 | 185. 252 | 21434884. 94 |
| M621T290_1 | 621. 1730401 | 289. 534 | 3260932. 29  |
| M621T211_1 | 621. 1745162 | 210. 883 | 13567076. 74 |
| M621T268_2 | 621. 1856702 | 267. 702 | 6436822. 819 |
| M621T263_1 | 621. 1853982 | 263. 129 | 5959962. 272 |
| M621T273_2 | 621. 1855535 | 273. 232 | 15447861. 44 |
| M621T306_2 | 621. 1858535 | 306. 164 | 853091. 5568 |
| M621T223_2 | 621. 1856032 | 222. 943 | 17950447. 2  |
| M621T107_1 | 621. 1854577 | 106. 648 | 38692953. 97 |
| M621T173   | 621. 1853806 | 173. 092 | 7532117. 026 |
| M621T185_2 | 621. 1855555 | 185. 252 | 52425280. 52 |

|            |              |          |              |
|------------|--------------|----------|--------------|
| M621T290_2 | 621. 1855543 | 289. 534 | 8986092. 632 |
| M621T211_2 | 621. 185525  | 210. 883 | 36431207. 3  |
| M621T290_3 | 621. 1965622 | 289. 534 | 4384721. 095 |
| M621T223_3 | 621. 2017463 | 222. 943 | 4233948. 765 |
| M621T107_2 | 621. 1964691 | 106. 648 | 19445654. 7  |
| M621T263_2 | 621. 1964093 | 263. 129 | 2591229. 537 |
| M621T185_3 | 621. 2014681 | 185. 252 | 13032849. 05 |
| M621T146   | 621. 1957173 | 146. 08  | 2824663. 082 |
| M621T273_3 | 621. 1965655 | 273. 232 | 7288760. 955 |
| M621T211_3 | 621. 2017397 | 210. 883 | 8680775. 079 |
| M621T526_1 | 621. 2152125 | 526. 124 | 728691. 4288 |
| M621T416   | 621. 2327827 | 416. 128 | 370275. 046  |
| M621T526_2 | 621. 228839  | 526. 124 | 478655. 361  |
| M621T577   | 621. 2332126 | 576. 787 | 159243. 5115 |
| M621T432   | 621. 2406665 | 431. 507 | 403955. 2929 |
| M621T683_3 | 621. 2882701 | 682. 948 | 2514372. 631 |
| M621T598_3 | 621. 2949432 | 598. 341 | 10321462. 47 |
| M621T626_4 | 621. 2939746 | 626. 183 | 11490781. 83 |
| M621T683_4 | 621. 3029502 | 682. 948 | 10581727. 41 |
| M621T649   | 621. 3116877 | 649. 195 | 10331334. 57 |
| M621T598_4 | 621. 3103927 | 598. 341 | 16776106. 41 |
| M621T626_5 | 621. 3104322 | 626. 183 | 18985480. 05 |
| M621T683_5 | 621. 3139647 | 682. 948 | 7384064. 832 |
| M621T608_1 | 621. 3764818 | 607. 625 | 1110466. 442 |
| M621T608_2 | 621. 3913708 | 607. 625 | 645962. 4411 |
| M622T107_1 | 621. 6812098 | 106. 648 | 13862726. 11 |
| M622T223_1 | 621. 6850575 | 222. 943 | 8733671. 771 |
| M622T185_1 | 621. 6849939 | 185. 252 | 29647797. 65 |
| M622T211_1 | 621. 6849309 | 210. 883 | 16846970. 87 |
| M622T107_2 | 621. 6959113 | 106. 648 | 12217945. 68 |
| M622T173   | 621. 6962249 | 173. 092 | 2969989. 887 |
| M622T223_2 | 621. 6960813 | 222. 943 | 5945095. 781 |
| M622T185_2 | 621. 6959911 | 185. 252 | 17816772. 53 |
| M622T211_2 | 621. 6959548 | 210. 883 | 11724455. 01 |
| M622T598   | 621. 7987803 | 598. 341 | 3759359. 312 |
| M622T626   | 621. 7991539 | 626. 183 | 5158583. 302 |
| M622T649_1 | 621. 8037534 | 649. 195 | 3537518. 242 |
| M622T683_1 | 621. 806333  | 682. 948 | 3470550. 89  |
| M622T625   | 621. 813861  | 624. 642 | 6450519. 866 |
| M622T597   | 621. 8138407 | 596. 795 | 4199945. 731 |
| M622T649_2 | 621. 818835  | 649. 195 | 5177633. 165 |
| M622T683_2 | 621. 8173636 | 682. 948 | 1713153. 605 |
| M622T500   | 622. 1671626 | 499. 759 | 590937. 2792 |
| M622T509   | 622. 1669172 | 509. 11  | 1744612. 797 |
| M622T320_1 | 622. 1737334 | 319. 785 | 2517470. 729 |
| M622T312_1 | 622. 1739502 | 312. 058 | 2186221. 682 |
| M622T223_3 | 622. 1850959 | 222. 943 | 3368508. 203 |
| M622T185_3 | 622. 1826102 | 185. 252 | 11110977. 07 |
| M622T108_1 | 622. 1813818 | 108. 082 | 5016666. 449 |
| M622T211_3 | 622. 1851857 | 210. 883 | 6734351. 843 |
| M622T331   | 622. 1921177 | 330. 552 | 483680. 1323 |
| M622T320_2 | 622. 1884493 | 319. 785 | 2983168. 127 |
| M622T312_2 | 622. 1886643 | 312. 058 | 1855412. 427 |
| M622T622_1 | 622. 1964244 | 621. 547 | 6398904. 317 |

|            |              |          |              |
|------------|--------------|----------|--------------|
| M622T223_4 | 622. 1961339 | 222. 943 | 2780354. 674 |
| M622T687_1 | 622. 1952093 | 687. 214 | 1190226. 879 |
| M622T185_4 | 622. 196841  | 185. 252 | 7046264. 288 |
| M622T640_1 | 622. 1968604 | 640. 057 | 970433. 9287 |
| M622T108_2 | 622. 1960909 | 108. 082 | 5366040. 068 |
| M622T211_4 | 622. 1962235 | 210. 883 | 5295163. 793 |
| M622T622_2 | 622. 211147  | 621. 547 | 18087967. 3  |
| M622T706_1 | 622. 2111707 | 705. 593 | 9423095. 921 |
| M622T687_2 | 622. 2110058 | 687. 214 | 7712854. 183 |
| M622T671   | 622. 2112685 | 670. 674 | 1970767. 615 |
| M622T640_2 | 622. 2111017 | 640. 057 | 3217346. 275 |
| M622T622_3 | 622. 2221855 | 621. 547 | 8998845. 486 |
| M622T706_2 | 622. 2231779 | 705. 593 | 4499130. 775 |
| M622T687_3 | 622. 2239829 | 687. 214 | 3622281. 306 |
| M622T640_3 | 622. 2269538 | 640. 057 | 801900. 7788 |
| M622T526   | 622. 2286444 | 526. 124 | 343023. 149  |
| M622T648   | 622. 3092973 | 647. 653 | 1971584. 629 |
| M622T649_3 | 622. 3223299 | 649. 195 | 1568730. 136 |
| M622T571_1 | 622. 3876536 | 570. 599 | 2885103. 048 |
| M622T638_1 | 622. 387488  | 638. 484 | 1405724. 596 |
| M622T638_2 | 622. 4022156 | 638. 484 | 1185733. 082 |
| M622T571_2 | 622. 4050685 | 570. 599 | 1557866. 653 |
| M623T273_1 | 622. 6823257 | 273. 232 | 715744. 3042 |
| M623T223   | 622. 6902232 | 222. 943 | 892750. 8755 |
| M623T212   | 622. 6895922 | 212. 366 | 1840890. 295 |
| M623T185_1 | 622. 6897368 | 185. 252 | 3792542. 297 |
| M623T273_2 | 622. 6933779 | 273. 232 | 1056439. 57  |
| M623T187   | 622. 70267   | 186. 689 | 799237. 4027 |
| M623T835_1 | 622. 8445779 | 835. 329 | 4062969. 434 |
| M623T835_2 | 622. 8556359 | 835. 329 | 3202515. 547 |
| M623T515   | 623. 1791666 | 515. 338 | 5211633. 619 |
| M623T466_1 | 623. 1783236 | 465. 575 | 1078524. 098 |
| M623T492_1 | 623. 1794436 | 491. 99  | 730394. 9292 |
| M623T318   | 623. 1832969 | 318. 232 | 1397066. 21  |
| M623T185_2 | 623. 1837587 | 185. 252 | 788441. 1035 |
| M623T520_1 | 623. 1913635 | 519. 998 | 7138989. 098 |
| M623T466_2 | 623. 1907971 | 465. 575 | 2856139. 944 |
| M623T492_2 | 623. 1910475 | 491. 99  | 2172688. 063 |
| M623T503_1 | 623. 1913716 | 502. 873 | 2535182. 116 |
| M623T185_3 | 623. 1972821 | 185. 252 | 463142. 3948 |
| M623T706   | 623. 2060622 | 705. 593 | 1520934      |
| M623T520_2 | 623. 2078086 | 519. 998 | 3804039. 697 |
| M623T466_3 | 623. 2074237 | 465. 575 | 1966189. 646 |
| M623T492_3 | 623. 2073593 | 491. 99  | 1358337. 886 |
| M623T503_2 | 623. 2069938 | 502. 873 | 1391259. 96  |
| M623T622_1 | 623. 2133336 | 621. 547 | 5483842. 275 |
| M623T687   | 623. 2170716 | 687. 214 | 2313698. 828 |
| M623T622_2 | 623. 2313831 | 621. 547 | 316188. 7351 |
| M623T106   | 623. 2389431 | 105. 537 | 3247846. 884 |
| M623T146   | 623. 2389418 | 146. 08  | 2136599. 006 |
| M623T798   | 623. 236969  | 797. 757 | 1018792. 959 |
| M623T506   | 623. 2906092 | 505. 99  | 2924624. 609 |
| M623T835_3 | 623. 3464558 | 835. 329 | 3847531. 657 |
| M623T819   | 623. 35701   | 818. 743 | 1850576. 926 |

|            |              |          |              |
|------------|--------------|----------|--------------|
| M623T571_1 | 623. 3902251 | 570. 599 | 986114. 3297 |
| M623T571_2 | 623. 4047682 | 570. 599 | 939278. 9387 |
| M624T835   | 623. 8449162 | 835. 329 | 834513. 736  |
| M624T221   | 624. 1586392 | 221. 453 | 675154. 4497 |
| M624T273   | 624. 1585862 | 273. 232 | 362400. 8175 |
| M624T272   | 624. 1720743 | 272. 312 | 362728. 8762 |
| M624T223   | 624. 1718715 | 222. 943 | 341723. 4845 |
| M624T520_1 | 624. 1925282 | 519. 998 | 1897754. 674 |
| M624T466   | 624. 1955391 | 465. 575 | 882501. 5204 |
| M624T687   | 624. 2101174 | 687. 214 | 338743. 9726 |
| M624T520_2 | 624. 2070928 | 519. 998 | 1739139. 116 |
| M624T494   | 624. 2064525 | 493. 56  | 400920. 0918 |
| M624T503   | 624. 2059868 | 502. 873 | 418246. 7864 |
| M624T464   | 624. 2140932 | 464. 011 | 263037. 538  |
| M624T726   | 624. 2356464 | 725. 713 | 571145. 0836 |
| M624T537   | 624. 299199  | 537. 051 | 586357. 375  |
| M624T526   | 624. 2991958 | 526. 124 | 496560. 2604 |
| M624T508   | 624. 3034749 | 507. 55  | 492231. 6479 |
| M625T509   | 624. 8355191 | 509. 11  | 937955. 5561 |
| M625T520   | 625. 1915845 | 519. 998 | 370865. 0339 |
| M625T638   | 625. 250603  | 638. 484 | 726531. 0741 |
| M625T746   | 625. 2580523 | 745. 747 | 206758. 1153 |
| M625T416   | 625. 2759978 | 416. 128 | 229016. 5913 |
| M625T601   | 625. 2913156 | 601. 473 | 746178. 5608 |
| M625T532   | 625. 3507417 | 532. 372 | 2757086. 908 |
| M626T744   | 626. 2235868 | 744. 192 | 272279. 8308 |
| M626T625   | 626. 3009796 | 624. 642 | 555394. 1429 |
| M626T545   | 626. 3454288 | 544. 759 | 886820. 5219 |
| M626T532   | 626. 3567435 | 532. 372 | 1065617. 204 |
| M627T802_1 | 626. 9036688 | 802. 116 | 8174358. 435 |
| M627T802_2 | 626. 9185557 | 802. 116 | 6250673. 524 |
| M627T484_1 | 627. 2166182 | 484. 221 | 1730409. 273 |
| M627T484_2 | 627. 2352332 | 484. 221 | 2768450. 617 |
| M627T577   | 627. 2976911 | 576. 787 | 1010693. 117 |
| M627T655   | 627. 3074395 | 655. 321 | 1131251. 015 |
| M627T486   | 627. 3208146 | 485. 784 | 872682. 4967 |
| M627T657   | 627. 3202488 | 656. 84  | 375876. 5695 |
| M628T575_1 | 627. 7850193 | 575. 222 | 395747. 2751 |
| M628T575_2 | 627. 7984596 | 575. 222 | 717594. 6163 |
| M628T802   | 627. 9134359 | 802. 116 | 1274814. 622 |
| M628T484_1 | 628. 2232037 | 484. 221 | 889238. 9246 |
| M628T746_1 | 628. 2339589 | 745. 747 | 733955. 7911 |
| M628T484_2 | 628. 2378869 | 484. 221 | 914011. 7679 |
| M628T746_2 | 628. 2488137 | 745. 747 | 670352. 5831 |
| M629T802   | 628. 9144687 | 802. 116 | 2122166. 691 |
| M629T331   | 629. 1826522 | 330. 552 | 1793278. 344 |
| M629T311_1 | 629. 1859364 | 310. 626 | 12900859. 21 |
| M629T303_1 | 629. 1861918 | 303. 259 | 7255129. 566 |
| M629T352   | 629. 1873523 | 351. 663 | 864988. 7775 |
| M629T166   | 629. 1951857 | 165. 522 | 350059. 4438 |
| M629T332   | 629. 1944909 | 332. 105 | 2548930. 495 |
| M629T311_2 | 629. 2021586 | 310. 626 | 9235039. 875 |
| M629T303_2 | 629. 2011159 | 303. 259 | 4945989. 866 |
| M629T532   | 629. 3012848 | 532. 372 | 983775. 0335 |

|            |              |          |              |
|------------|--------------|----------|--------------|
| M629T574   | 629. 3894509 | 573. 704 | 296863. 3647 |
| M630T534   | 629. 8021662 | 533. 931 | 906927. 6324 |
| M630T311   | 630. 1883582 | 310. 626 | 2450446. 689 |
| M631T303   | 631. 2169159 | 303. 259 | 260570. 8224 |
| M631T428   | 631. 2394259 | 428. 448 | 473633. 0292 |
| M631T439   | 631. 2393263 | 439. 27  | 1081878. 962 |
| M631T438   | 631. 2542585 | 437. 734 | 707173. 6759 |
| M632T492_1 | 631. 8080165 | 491. 99  | 1001827. 487 |
| M632T492_2 | 631. 8233062 | 491. 99  | 997006. 2925 |
| M632T475   | 632. 105682  | 474. 888 | 670936. 75   |
| M632T185   | 632. 1852131 | 185. 252 | 741135. 3578 |
| M632T208   | 632. 1960717 | 207. 935 | 338627. 8934 |
| M632T288   | 632. 1997534 | 287. 981 | 237281. 5378 |
| M632T93_1  | 632. 203444  | 92. 9618 | 156763466. 5 |
| M632T297   | 632. 203556  | 297. 149 | 512891. 2412 |
| M632T93_2  | 632. 2161706 | 92. 9618 | 39817209. 61 |
| M633T441   | 632. 8038441 | 440. 833 | 107996. 3337 |
| M633T578   | 632. 806942  | 578. 353 | 276178. 0105 |
| M633T122   | 633. 1159612 | 122. 381 | 12542356. 84 |
| M633T146   | 633. 1157049 | 146. 08  | 3731273. 074 |
| M633T462_1 | 633. 2489031 | 462. 446 | 4155756. 951 |
| M633T462_2 | 633. 2675025 | 462. 446 | 5287578. 131 |
| M633T709_1 | 633. 3018857 | 708. 697 | 2168179. 784 |
| M633T709_2 | 633. 3207787 | 708. 697 | 1740732. 057 |
| M634T710_1 | 633. 8049257 | 710. 246 | 1455906. 845 |
| M634T710_2 | 633. 8200696 | 710. 246 | 1455121. 256 |
| M634T122   | 634. 1183881 | 122. 381 | 2404492. 664 |
| M634T124   | 634. 1306843 | 123. 792 | 966861. 3307 |
| M634T205   | 634. 1983784 | 204. 895 | 1597311. 262 |
| M634T796   | 634. 2477505 | 796. 202 | 1393819. 543 |
| M634T631   | 634. 3129242 | 630. 737 | 431523. 4329 |
| M634T710_3 | 634. 3216894 | 710. 246 | 408959. 0308 |
| M634T503_1 | 634. 3534874 | 502. 873 | 5838275. 846 |
| M634T503_2 | 634. 3686383 | 502. 873 | 2744364. 833 |
| M634T603   | 634. 3914554 | 603. 04  | 843454. 7346 |
| M635T710   | 634. 812434  | 710. 246 | 249957. 1014 |
| M635T826   | 634. 9148254 | 826. 333 | 297306. 962  |
| M635T554   | 635. 2853635 | 554. 027 | 801822. 8755 |
| M635T609   | 635. 2939306 | 609. 19  | 268744. 1884 |
| M635T503_1 | 635. 3587172 | 502. 873 | 2477127. 436 |
| M635T503_2 | 635. 3701117 | 502. 873 | 1509421. 313 |
| M636T525_1 | 636. 2448199 | 524. 56  | 245456. 2683 |
| M636T746   | 636. 2638656 | 745. 747 | 7953132. 99  |
| M636T508   | 636. 2840013 | 507. 55  | 2176434. 311 |
| M636T526   | 636. 2860126 | 526. 124 | 902996. 8936 |
| M636T580   | 636. 3077464 | 579. 883 | 360819. 7943 |
| M636T504   | 636. 3027646 | 504. 432 | 1127296. 953 |
| M636T525_2 | 636. 3024983 | 524. 56  | 2741631. 915 |
| M636T828   | 636. 343295  | 827. 821 | 3398451. 255 |
| M636T834   | 636. 3551474 | 833. 866 | 692185. 8732 |
| M636T543_1 | 636. 3662374 | 543. 216 | 18122753. 63 |
| M636T578_1 | 636. 370137  | 578. 353 | 5931461. 224 |
| M636T566_1 | 636. 3702227 | 566. 042 | 1158255. 751 |
| M636T578_2 | 636. 3815505 | 578. 353 | 4142720. 964 |

|            |              |          |              |
|------------|--------------|----------|--------------|
| M636T543_2 | 636. 3852665 | 543. 216 | 9134861. 756 |
| M636T566_2 | 636. 3815944 | 566. 042 | 764818. 9651 |
| M637T526_1 | 636. 7911665 | 526. 124 | 680908. 2339 |
| M637T515_1 | 636. 796609  | 515. 338 | 1027973. 1   |
| M637T504   | 636. 7969896 | 504. 432 | 917954. 2201 |
| M637T526_2 | 636. 8058403 | 526. 124 | 639892. 9461 |
| M637T753   | 637. 2235194 | 753. 315 | 996508. 8536 |
| M637T746   | 637. 2613487 | 745. 747 | 1254106. 184 |
| M637T416_1 | 637. 2651633 | 416. 128 | 1477315. 677 |
| M637T801_1 | 637. 2656633 | 800. 683 | 788758. 4616 |
| M637T416_2 | 637. 2766115 | 416. 128 | 1184308. 34  |
| M637T801_2 | 637. 2836473 | 800. 683 | 658102. 0034 |
| M637T515_2 | 637. 2928405 | 515. 338 | 440953. 7276 |
| M637T526_3 | 637. 2963465 | 526. 124 | 551680. 6894 |
| M637T515_3 | 637. 3068701 | 515. 338 | 949078. 9315 |
| M637T528   | 637. 3098044 | 527. 688 | 546012. 0395 |
| M637T543_1 | 637. 3724306 | 543. 216 | 8130411. 298 |
| M637T543_2 | 637. 3876758 | 543. 216 | 4216987. 111 |
| M638T817_1 | 638. 3389356 | 817. 214 | 299293. 5734 |
| M638T826   | 638. 3389073 | 826. 333 | 234920. 0001 |
| M638T817_2 | 638. 3580552 | 817. 214 | 1070940. 653 |
| M638T539   | 638. 3809253 | 538. 619 | 18947086. 29 |
| M638T569_1 | 638. 3848445 | 569. 091 | 8638400. 457 |
| M638T537   | 638. 3961985 | 537. 051 | 19829414. 48 |
| M638T569_2 | 638. 3963166 | 569. 091 | 6971175. 054 |
| M639T344_1 | 639. 1729278 | 344. 233 | 3678297. 853 |
| M639T334_1 | 639. 1729379 | 333. 655 | 3031703. 377 |
| M639T344_2 | 639. 1870178 | 344. 233 | 1256169. 679 |
| M639T334_2 | 639. 1881313 | 333. 655 | 1067848. 867 |
| M639T486   | 639. 2809141 | 485. 784 | 236009. 3014 |
| M639T718   | 639. 3689502 | 717. 942 | 907944. 6866 |
| M639T537   | 639. 3767695 | 537. 051 | 1771297. 06  |
| M639T716   | 639. 3823695 | 716. 391 | 296033. 6899 |
| M639T539_1 | 639. 3917483 | 538. 619 | 10131869. 02 |
| M639T539_2 | 639. 4032358 | 538. 619 | 4661412. 208 |
| M640T574   | 639. 8042758 | 573. 704 | 1997661. 851 |
| M640T187   | 640. 1589584 | 186. 689 | 968291. 7641 |
| M640T221_1 | 640. 1557302 | 221. 453 | 1018566. 412 |
| M640T274   | 640. 159541  | 273. 82  | 1970747. 3   |
| M640T262   | 640. 1592817 | 262. 302 | 762678. 2063 |
| M640T221_2 | 640. 1672177 | 221. 453 | 1270803. 612 |
| M640T334   | 640. 1905358 | 333. 655 | 364912. 3885 |
| M640T605   | 640. 2123197 | 604. 606 | 325059. 1801 |
| M640T571_1 | 640. 2977133 | 570. 599 | 6457387. 124 |
| M640T571_2 | 640. 3092426 | 570. 599 | 3257272. 733 |
| M641T275   | 640. 6587321 | 274. 794 | 406689. 2649 |
| M641T262   | 640. 6662578 | 262. 302 | 675172. 6557 |
| M641T571_1 | 640. 7934189 | 570. 599 | 2369606. 157 |
| M641T470_1 | 640. 8009143 | 470. 253 | 4592357. 709 |
| M641T571_2 | 640. 8087974 | 570. 599 | 2353904. 915 |
| M641T273   | 641. 1588686 | 273. 232 | 174838. 6067 |
| M641T104   | 641. 2476286 | 104. 493 | 4497108. 791 |
| M641T470_2 | 641. 2840486 | 470. 253 | 1795124. 015 |
| M641T470_3 | 641. 297492  | 470. 253 | 4042816. 696 |

|            |              |          |              |
|------------|--------------|----------|--------------|
| M641T626   | 641. 3025321 | 626. 183 | 636418. 8547 |
| M641T571_3 | 641. 301725  | 570. 599 | 4554052. 233 |
| M641T571_4 | 641. 3166828 | 570. 599 | 3089024. 903 |
| M641T401   | 641. 3280789 | 400. 641 | 2845431. 67  |
| M641T727   | 641. 3993955 | 727. 22  | 166743. 4052 |
| M642T571_1 | 641. 7990742 | 570. 599 | 1651422. 13  |
| M642T571_2 | 641. 8142066 | 570. 599 | 3281544. 189 |
| M642T498_1 | 642. 1183896 | 498. 202 | 552760. 9218 |
| M642T498_2 | 642. 1337994 | 498. 202 | 1302137. 267 |
| M642T427   | 642. 1765282 | 426. 913 | 3246034. 728 |
| M642T554_1 | 642. 2795305 | 554. 027 | 186926. 5662 |
| M642T645_1 | 642. 3045027 | 644. 722 | 6739967. 57  |
| M642T375_1 | 642. 3037835 | 374. 746 | 1066485. 238 |
| M642T620_1 | 642. 3040626 | 619. 986 | 3671556. 36  |
| M642T632_1 | 642. 3041631 | 632. 288 | 3895675. 39  |
| M642T554_2 | 642. 3032656 | 554. 027 | 1012270. 944 |
| M642T645_2 | 642. 3229325 | 644. 722 | 14231710. 91 |
| M642T375_2 | 642. 3153547 | 374. 746 | 907078. 4409 |
| M642T632_2 | 642. 3227324 | 632. 288 | 7685796. 109 |
| M642T620_2 | 642. 3231618 | 619. 986 | 7153443. 254 |
| M642T401   | 642. 3369832 | 400. 641 | 331701. 8331 |
| M642T532   | 642. 3379114 | 532. 372 | 609135. 8951 |
| M643T66    | 643. 0940238 | 66. 2043 | 79948. 82173 |
| M643T554_1 | 643. 2803877 | 554. 027 | 800187. 1429 |
| M643T554_2 | 643. 2939106 | 554. 027 | 622038. 4388 |
| M644T554   | 643. 7869895 | 554. 027 | 646644. 0407 |
| M644T106   | 644. 1968994 | 105. 537 | 2497475. 187 |
| M644T638   | 644. 1934626 | 638. 484 | 206676. 8066 |
| M644T484_1 | 644. 206615  | 484. 221 | 619682. 46   |
| M644T601   | 644. 2225491 | 601. 473 | 1384070. 826 |
| M644T484_2 | 644. 2189185 | 484. 221 | 1321678. 084 |
| M644T483   | 644. 2313514 | 482. 656 | 439220. 9141 |
| M644T537_1 | 644. 2921299 | 537. 051 | 1545320. 22  |
| M644T537_2 | 644. 3037447 | 537. 051 | 1097871. 144 |
| M645T537   | 644. 8079352 | 537. 051 | 375335. 3669 |
| M646T65    | 645. 6496706 | 65. 4825 | 27275. 20289 |
| M646T486   | 645. 8108334 | 485. 784 | 465713. 1409 |
| M646T660   | 646. 1728498 | 659. 904 | 431068. 7629 |
| M646T487   | 646. 2425899 | 487. 329 | 301970. 3319 |
| M647T107   | 647. 1977222 | 106. 648 | 9416212. 258 |
| M647T164_1 | 647. 1945273 | 164. 077 | 7893327. 662 |
| M647T372_1 | 647. 194605  | 371. 633 | 2644513. 596 |
| M647T241_1 | 647. 1928517 | 240. 733 | 5889213. 147 |
| M647T146_1 | 647. 1936222 | 146. 08  | 3864548. 806 |
| M647T335   | 647. 1981549 | 335. 153 | 4123650. 034 |
| M647T164_2 | 647. 2062378 | 164. 077 | 8644448      |
| M647T372_2 | 647. 2104036 | 371. 633 | 2551160. 635 |
| M647T241_2 | 647. 2065102 | 240. 733 | 6812985. 489 |
| M647T146_2 | 647. 2058351 | 146. 08  | 4484521. 385 |
| M647T334   | 647. 2132615 | 333. 655 | 1503654. 57  |
| M647T106   | 647. 2257615 | 105. 537 | 4716050. 06  |
| M647T686   | 647. 2903097 | 686. 047 | 1187816. 127 |
| M647T464   | 647. 3307369 | 464. 011 | 883711. 2417 |
| M648T464   | 647. 8374324 | 464. 011 | 150958. 892  |



|            |              |          |              |
|------------|--------------|----------|--------------|
| M648T106   | 648. 1953184 | 105. 537 | 2126635. 338 |
| M648T335_1 | 648. 1987819 | 335. 153 | 864741. 9515 |
| M648T370   | 648. 1982491 | 370. 115 | 742347. 3666 |
| M648T241   | 648. 202905  | 240. 733 | 2030996. 995 |
| M648T107   | 648. 209055  | 106. 648 | 2236307. 611 |
| M648T164_1 | 648. 2033979 | 164. 077 | 2310942. 197 |
| M648T335_2 | 648. 2105547 | 335. 153 | 943438. 6636 |
| M648T372   | 648. 2110749 | 371. 633 | 771542. 4153 |
| M648T164_2 | 648. 2155913 | 164. 077 | 1101734. 168 |
| M648T684   | 648. 2929764 | 684. 499 | 244583. 5102 |
| M649T428_1 | 648. 7824647 | 428. 448 | 748794. 119  |
| M649T428_2 | 648. 7980669 | 428. 448 | 1014333. 663 |
| M649T98    | 649. 1748885 | 97. 682  | 9937200. 536 |
| M649T164   | 649. 2002429 | 164. 077 | 297478. 2109 |
| M649T603   | 649. 2957523 | 603. 04  | 651206. 7329 |
| M649T428_3 | 649. 3038165 | 428. 448 | 306496. 9696 |
| M649T605   | 649. 3116403 | 604. 606 | 452095. 9372 |
| M650T575_1 | 650. 2938478 | 575. 222 | 2398503. 505 |
| M650T655_1 | 650. 3017453 | 655. 321 | 6491278. 855 |
| M650T575_2 | 650. 3093065 | 575. 222 | 638061. 6476 |
| M650T655_2 | 650. 3135413 | 655. 321 | 15022355. 62 |
| M650T655_3 | 650. 3279113 | 655. 321 | 2850950. 149 |
| M650T489_1 | 650. 3809796 | 488. 885 | 291944. 0911 |
| M650T489_2 | 650. 3950589 | 488. 885 | 395095. 3228 |
| M651T577   | 650. 7896364 | 576. 787 | 1236507. 675 |
| M651T655_1 | 650. 7980082 | 655. 321 | 1256998. 813 |
| M651T575_1 | 650. 8053979 | 575. 222 | 1074249. 432 |
| M651T655_2 | 650. 8132491 | 655. 321 | 9838285. 2   |
| M651T655_3 | 650. 8289949 | 655. 321 | 2917993. 194 |
| M651T575_2 | 651. 291628  | 575. 222 | 665895. 0834 |
| M651T584   | 651. 2918439 | 584. 484 | 397988. 5473 |
| M651T655_4 | 651. 3191698 | 655. 321 | 3541976. 638 |
| M651T503   | 651. 3398892 | 502. 873 | 239815. 9564 |
| M652T655_1 | 651. 810486  | 655. 321 | 954515. 4755 |
| M652T655_2 | 651. 8260637 | 655. 321 | 801959. 4061 |
| M652T761_1 | 652. 2416076 | 760. 976 | 101118. 6536 |
| M652T746_1 | 652. 2409142 | 745. 747 | 8940243. 292 |
| M652T799   | 652. 240964  | 799. 306 | 8357878. 137 |
| M652T746_2 | 652. 2527589 | 745. 747 | 58558752. 49 |
| M652T801_1 | 652. 2567336 | 800. 683 | 59935356. 57 |
| M652T761_2 | 652. 2646845 | 760. 976 | 825112. 6687 |
| M652T746_3 | 652. 264606  | 745. 747 | 59905399. 25 |
| M652T801_2 | 652. 272418  | 800. 683 | 18840532. 13 |
| M652T532   | 652. 2918031 | 532. 372 | 1313988. 64  |
| M652T542   | 652. 2997754 | 541. 673 | 271230. 2644 |
| M653T589   | 653. 3443007 | 589. 157 | 966250. 1504 |
| M653T545   | 653. 3674183 | 544. 759 | 2727550. 068 |
| M654T746_1 | 654. 2541158 | 745. 747 | 2159849. 069 |
| M654T801_1 | 654. 2559632 | 800. 683 | 3015944. 675 |
| M654T746_2 | 654. 2699889 | 745. 747 | 4459410. 183 |
| M654T801_2 | 654. 2718118 | 800. 683 | 3753345. 852 |
| M654T504   | 654. 353325  | 504. 432 | 1608772. 83  |
| M654T545   | 654. 3709123 | 544. 759 | 1037267. 929 |
| M655T470   | 654. 8433418 | 470. 253 | 3549785. 429 |

|            |              |          |              |
|------------|--------------|----------|--------------|
| M655T746   | 655. 274661  | 745. 747 | 656987. 9664 |
| M655T793_1 | 655. 3013596 | 793. 233 | 1955018. 13  |
| M655T793_2 | 655. 3169476 | 793. 233 | 4844782. 876 |
| M655T572   | 655. 3701899 | 572. 152 | 886918. 4672 |
| M655T539   | 655. 3849323 | 538. 619 | 1080252. 759 |
| M656T832   | 655. 5236666 | 832. 338 | 1892847. 4   |
| M656T817_1 | 655. 5236963 | 817. 214 | 677523. 5812 |
| M656T817_2 | 655. 5356279 | 817. 214 | 650151. 823  |
| M656T835   | 655. 5353805 | 835. 329 | 1591128. 981 |
| M656T385   | 656. 1707748 | 385. 225 | 433122. 6831 |
| M656T163_1 | 656. 1920452 | 162. 615 | 7324724. 005 |
| M656T293_1 | 656. 1973803 | 292. 621 | 4571494. 091 |
| M656T202_1 | 656. 1913617 | 201. 897 | 2362259. 777 |
| M656T179_1 | 656. 1913308 | 179. 046 | 6126599. 828 |
| M656T107_1 | 656. 1986048 | 106. 648 | 8184534. 314 |
| M656T252   | 656. 201342  | 251. 727 | 1132482. 297 |
| M656T238   | 656. 2043857 | 238. 024 | 4541759. 936 |
| M656T163_2 | 656. 2045536 | 162. 615 | 13843909. 85 |
| M656T293_2 | 656. 2107905 | 292. 621 | 8106100. 976 |
| M656T202_2 | 656. 204343  | 201. 897 | 3821302. 418 |
| M656T179_2 | 656. 2032562 | 179. 046 | 11283202. 43 |
| M656T163_3 | 656. 2196085 | 162. 615 | 9164382. 091 |
| M656T181   | 656. 2153092 | 180. 601 | 7178265. 078 |
| M656T203   | 656. 219696  | 203. 346 | 2322704. 129 |
| M656T107_2 | 656. 2107985 | 106. 648 | 9811256. 049 |
| M656T240   | 656. 2189544 | 239. 574 | 1543084. 621 |
| M656T382_1 | 656. 3162307 | 382. 171 | 3265710. 52  |
| M656T795   | 656. 3303828 | 794. 753 | 350502. 0118 |
| M656T382_2 | 656. 3321779 | 382. 171 | 3256979. 042 |
| M657T834   | 656. 5272121 | 833. 866 | 557645. 8867 |
| M657T293   | 656. 6991172 | 292. 621 | 2582096. 705 |
| M657T246   | 656. 7000462 | 246. 474 | 426690. 5592 |
| M657T238   | 656. 700272  | 238. 024 | 1409832. 75  |
| M657T163   | 656. 7065859 | 162. 615 | 8312820. 762 |
| M657T202   | 656. 7076248 | 201. 897 | 2441561. 448 |
| M657T107   | 656. 7066226 | 106. 648 | 8310869. 081 |
| M657T179_1 | 656. 7073508 | 179. 046 | 5987506. 912 |
| M657T255   | 656. 7148461 | 254. 651 | 542539. 3324 |
| M657T179_2 | 656. 7214137 | 179. 046 | 2263815. 175 |
| M657T161   | 656. 7183951 | 161. 184 | 3464443. 882 |
| M657T340   | 657. 1779654 | 339. 772 | 1305401. 163 |
| M657T372   | 657. 1942747 | 371. 633 | 372489. 781  |
| M657T179_3 | 657. 2055328 | 179. 046 | 1881628. 874 |
| M657T178   | 657. 217627  | 177. 649 | 1711364. 401 |
| M657T628   | 657. 312964  | 627. 731 | 1713061. 941 |
| M657T382_1 | 657. 3223222 | 382. 171 | 1359020. 973 |
| M657T615   | 657. 3261712 | 615. 38  | 3063809. 606 |
| M657T382_2 | 657. 34025   | 382. 171 | 368511. 0567 |
| M658T835   | 657. 5420014 | 835. 329 | 870153. 8422 |
| M658T179   | 657. 704998  | 179. 046 | 742905. 7047 |
| M658T181   | 657. 7178335 | 180. 601 | 733481. 2211 |
| M658T475_1 | 658. 1120266 | 474. 888 | 2706357. 544 |
| M658T475_2 | 658. 1377873 | 474. 888 | 1713078. 433 |
| M658T428   | 658. 1501383 | 428. 448 | 1989551. 151 |

|            |              |          |              |
|------------|--------------|----------|--------------|
| M658T220   | 658. 2151038 | 219. 979 | 1766311. 607 |
| M658T504   | 658. 2941887 | 504. 432 | 256791. 5392 |
| M658T382_1 | 658. 3241409 | 382. 171 | 188181. 3017 |
| M658T382_2 | 658. 3361585 | 382. 171 | 178842. 3623 |
| M659T475_1 | 659. 1199243 | 474. 888 | 1100026. 631 |
| M659T475_2 | 659. 1361275 | 474. 888 | 999902. 0678 |
| M659T427   | 659. 1682567 | 426. 913 | 1102376. 445 |
| M659T467   | 659. 1806637 | 467. 127 | 319605. 3168 |
| M659T102_1 | 659. 2504761 | 101. 563 | 18491422. 79 |
| M659T102_2 | 659. 2642358 | 101. 563 | 25586683. 81 |
| M660T475   | 660. 1252764 | 474. 888 | 271874. 2888 |
| M660T501   | 660. 316913  | 501. 318 | 288764. 0741 |
| M660T835   | 660. 4986061 | 835. 329 | 1391057. 939 |
| M661T466   | 661. 2167331 | 465. 575 | 179066. 8844 |
| M662T832_1 | 662. 4675786 | 832. 338 | 1984047. 411 |
| M662T832_2 | 662. 4789339 | 832. 338 | 2291272. 909 |
| M663T106_1 | 663. 1910618 | 105. 537 | 3992321. 522 |
| M663T297   | 663. 1952761 | 297. 149 | 198125. 0471 |
| M663T99    | 663. 202587  | 98. 9649 | 2112252. 864 |
| M663T106_2 | 663. 2030017 | 105. 537 | 4203601. 391 |
| M663T807   | 663. 4869588 | 806. 698 | 519008. 7426 |
| M664T835   | 663. 511366  | 835. 329 | 824584. 96   |
| M664T837   | 663. 524358  | 836. 769 | 656187. 3023 |
| M664T372_1 | 664. 1839527 | 371. 633 | 1504855. 55  |
| M664T334_1 | 664. 1840719 | 333. 655 | 1551446. 165 |
| M664T372_2 | 664. 1963982 | 371. 633 | 1763837. 789 |
| M664T334_2 | 664. 1962482 | 333. 655 | 2032017. 269 |
| M664T103_1 | 664. 2212152 | 102. 948 | 10681901. 31 |
| M664T103_2 | 664. 2329884 | 102. 948 | 12550236. 65 |
| M664T686   | 664. 2758615 | 686. 047 | 171673. 7695 |
| M664T614   | 664. 3025319 | 613. 824 | 787544. 6013 |
| M664T635_1 | 664. 3059993 | 635. 37  | 1422333. 931 |
| M664T612   | 664. 3179538 | 612. 3   | 1219666. 759 |
| M664T635_2 | 664. 3181053 | 635. 37  | 1263220. 865 |
| M665T635_1 | 664. 8050656 | 635. 37  | 877997. 9447 |
| M665T635_2 | 664. 8208947 | 635. 37  | 761359. 9526 |
| M665T67    | 664. 9491293 | 67. 1831 | 141788. 3723 |
| M665T68    | 664. 9609875 | 67. 6441 | 186420. 6152 |
| M665T187   | 665. 1989949 | 186. 689 | 1713452. 836 |
| M665T106_1 | 665. 1987012 | 105. 537 | 140957146. 8 |
| M665T147_1 | 665. 19814   | 147. 455 | 120169800. 1 |
| M665T122_1 | 665. 1987177 | 122. 381 | 10839882. 29 |
| M665T293   | 665. 2053393 | 292. 621 | 1162315. 418 |
| M665T172_1 | 665. 1984325 | 171. 546 | 7399449. 515 |
| M665T130   | 665. 1984383 | 129. 827 | 5062878. 373 |
| M665T106_2 | 665. 2121188 | 105. 537 | 340112138. 1 |
| M665T147_2 | 665. 212343  | 147. 455 | 278158977. 4 |
| M665T122_2 | 665. 2121783 | 122. 381 | 26020288. 13 |
| M665T393_1 | 665. 2164469 | 392. 905 | 514525. 1498 |
| M665T172_2 | 665. 2126641 | 171. 546 | 17534624. 41 |
| M665T361_1 | 665. 2198197 | 360. 831 | 458672. 6187 |
| M665T147_3 | 665. 2278584 | 147. 455 | 57484797. 22 |
| M665T170   | 665. 2254445 | 170. 049 | 6190530. 178 |
| M665T106_3 | 665. 2283895 | 105. 537 | 70145512. 84 |

|            |              |          |              |
|------------|--------------|----------|--------------|
| M665T393_2 | 665. 232729  | 392. 905 | 1023502. 812 |
| M665T361_2 | 665. 2331305 | 360. 831 | 702860. 097  |
| M665T534   | 665. 2992602 | 533. 931 | 492615. 1083 |
| M665T629_1 | 665. 3101917 | 629. 272 | 250772131. 3 |
| M665T629_2 | 665. 3223976 | 629. 272 | 349291208. 8 |
| M665T645   | 665. 3343619 | 644. 722 | 16083252. 89 |
| M665T620   | 665. 3346991 | 619. 986 | 31066981. 8  |
| M665T632   | 665. 3345635 | 632. 288 | 35367670. 25 |
| M665T655_1 | 665. 378623  | 655. 321 | 793033. 2323 |
| M665T655_2 | 665. 394707  | 655. 321 | 1019818. 911 |
| M666T151   | 665. 7735469 | 150. 528 | 221853. 9123 |
| M666T629   | 665. 8110358 | 629. 272 | 154782238    |
| M666T147_1 | 666. 202111  | 147. 455 | 24726936. 24 |
| M666T172_1 | 666. 2023165 | 171. 546 | 1451822. 334 |
| M666T124   | 666. 2144278 | 123. 792 | 8768006. 119 |
| M666T106_1 | 666. 2139718 | 105. 537 | 92347379. 42 |
| M666T147_2 | 666. 2143365 | 147. 455 | 72417671. 13 |
| M666T172_2 | 666. 2140948 | 171. 546 | 4641434. 025 |
| M666T106_2 | 666. 2362264 | 105. 537 | 27177277. 26 |
| M666T147_3 | 666. 2346611 | 147. 455 | 19048050. 12 |
| M666T172_3 | 666. 2345864 | 171. 546 | 1270517. 478 |
| M667T147_1 | 667. 2059385 | 147. 455 | 9558423. 868 |
| M667T106_1 | 667. 2133555 | 105. 537 | 22531032. 53 |
| M667T147_2 | 667. 2181908 | 147. 455 | 20623128. 6  |
| M667T172_1 | 667. 2185675 | 171. 546 | 763578. 4934 |
| M667T106_2 | 667. 225589  | 105. 537 | 16675968. 66 |
| M667T172_2 | 667. 2304356 | 171. 546 | 620329. 5368 |
| M667T149   | 667. 2310727 | 148. 981 | 4919767. 409 |
| M667T512   | 667. 2901315 | 512. 228 | 118016. 9592 |
| M667T779   | 667. 4224566 | 779. 407 | 1508752. 374 |
| M667T786   | 667. 4352622 | 785. 593 | 7330379. 054 |
| M667T811_1 | 667. 4587976 | 811. 292 | 5763738. 754 |
| M667T811_2 | 667. 4723631 | 811. 292 | 4212689. 646 |
| M668T69    | 668. 1826417 | 69. 1983 | 647952. 1784 |
| M668T741_1 | 668. 2085942 | 741. 077 | 2307432. 79  |
| M668T147   | 668. 2234005 | 147. 455 | 3426496. 232 |
| M668T741_2 | 668. 2229285 | 741. 077 | 2522006. 913 |
| M668T743   | 668. 2368805 | 742. 631 | 465817. 7679 |
| M668T786   | 668. 4428709 | 785. 593 | 2959860. 223 |
| M668T811_1 | 668. 455668  | 811. 292 | 1994452. 55  |
| M668T811_2 | 668. 4710409 | 811. 292 | 2759087. 451 |
| M669T68_1  | 668. 6674925 | 67. 6441 | 773338. 8774 |
| M669T68_2  | 669. 1701771 | 67. 6441 | 203176. 192  |
| M669T68_3  | 669. 1825339 | 67. 6441 | 125505. 9336 |
| M669T814_1 | 669. 445011  | 814. 118 | 1858547. 545 |
| M669T814_2 | 669. 4593153 | 814. 118 | 4314160. 791 |
| M669T837   | 669. 4884635 | 836. 769 | 1020535. 585 |
| M670T835   | 669. 5005739 | 835. 329 | 763047. 0537 |
| M670T296_1 | 670. 1992021 | 295. 704 | 3399588. 119 |
| M670T224_1 | 670. 2026914 | 224. 484 | 4714140. 17  |
| M670T109   | 670. 2098263 | 109. 475 | 1322130. 719 |
| M670T296_2 | 670. 2113579 | 295. 704 | 3041865. 508 |
| M670T224_2 | 670. 2158761 | 224. 484 | 2462121. 996 |
| M670T537_1 | 670. 2935868 | 537. 051 | 674915. 9201 |

|            |              |          |              |
|------------|--------------|----------|--------------|
| M670T537_2 | 670. 3067884 | 537. 051 | 878456. 3796 |
| M670T826   | 670. 3234535 | 826. 333 | 1409190. 321 |
| M670T589_1 | 670. 3373711 | 589. 157 | 162947. 8232 |
| M670T825   | 670. 3359358 | 824. 864 | 875244. 9754 |
| M670T589_2 | 670. 3493249 | 589. 157 | 130842. 1055 |
| M670T814_1 | 670. 4554235 | 814. 118 | 1446064. 481 |
| M670T814_2 | 670. 4670477 | 814. 118 | 1350219. 573 |
| M671T223_1 | 670. 7016807 | 222. 943 | 2984978. 115 |
| M671T297_1 | 670. 6972906 | 297. 149 | 1239137. 008 |
| M671T223_2 | 670. 7140386 | 222. 943 | 2440270. 807 |
| M671T296   | 670. 7099439 | 295. 704 | 2003242. 683 |
| M671T297_2 | 671. 2003029 | 297. 149 | 828800. 1577 |
| M671T224_1 | 671. 199764  | 224. 484 | 724418. 1089 |
| M671T297_3 | 671. 2147341 | 297. 149 | 635104. 7803 |
| M671T224_2 | 671. 2128032 | 224. 484 | 854661. 4095 |
| M673T746_1 | 673. 2168229 | 745. 747 | 710075. 8056 |
| M673T166   | 673. 232631  | 165. 522 | 259481. 8713 |
| M673T746_2 | 673. 2332586 | 745. 747 | 706704. 9604 |
| M673T628_1 | 673. 2983549 | 627. 731 | 1433484. 3   |
| M673T556_1 | 673. 3075141 | 555. 524 | 1870448. 498 |
| M673T542   | 673. 3136791 | 541. 673 | 2121677. 462 |
| M673T628_2 | 673. 3107341 | 627. 731 | 1435758. 972 |
| M673T556_2 | 673. 3205087 | 555. 524 | 2606006. 07  |
| M673T529_1 | 673. 3464757 | 529. 248 | 609818. 1137 |
| M673T529_2 | 673. 361626  | 529. 248 | 548663. 0502 |
| M673T694   | 673. 3889584 | 694. 341 | 1407275. 179 |
| M674T628   | 673. 8041005 | 627. 731 | 1589324. 524 |
| M674T556_1 | 673. 8089947 | 555. 524 | 1397490. 223 |
| M674T542_1 | 673. 8089904 | 541. 673 | 1150557. 068 |
| M674T556_2 | 673. 8214376 | 555. 524 | 1929391. 573 |
| M674T542_2 | 673. 8223979 | 541. 673 | 1368307. 744 |
| M674T529_1 | 673. 8486796 | 529. 248 | 443468. 8372 |
| M674T529_2 | 673. 8609549 | 529. 248 | 362591. 6341 |
| M674T179_1 | 674. 1853312 | 179. 046 | 1555343. 8   |
| M674T249   | 674. 1910006 | 249. 466 | 225578. 4529 |
| M674T237   | 674. 1906981 | 236. 518 | 1098040. 785 |
| M674T179_2 | 674. 2000262 | 179. 046 | 2496927. 915 |
| M674T238   | 674. 2027703 | 238. 024 | 811059. 4316 |
| M674T629   | 674. 3032741 | 629. 272 | 652129. 965  |
| M674T556_3 | 674. 3110864 | 555. 524 | 544388. 3472 |
| M674T449_1 | 674. 3549507 | 448. 527 | 171320. 3514 |
| M674T449_2 | 674. 3674058 | 448. 527 | 138371. 242  |
| M675T291_1 | 674. 6905994 | 291. 076 | 570125. 5608 |
| M675T291_2 | 674. 7061466 | 291. 076 | 592055. 2889 |
| M675T179   | 674. 7024699 | 179. 046 | 1108325. 758 |
| M675T832_1 | 674. 9029867 | 832. 338 | 557185. 2251 |
| M675T832_2 | 674. 9183288 | 832. 338 | 642773. 0449 |
| M675T438_1 | 675. 1842412 | 437. 734 | 333256. 821  |
| M675T181_1 | 675. 1896314 | 180. 601 | 721665. 6444 |
| M675T321_1 | 675. 1935976 | 321. 312 | 2876745. 184 |
| M675T332_1 | 675. 192617  | 332. 105 | 958300. 7027 |
| M675T303_1 | 675. 1925658 | 303. 259 | 13907571. 3  |
| M675T438_2 | 675. 1967475 | 437. 734 | 362049. 4454 |
| M675T181_2 | 675. 2014402 | 180. 601 | 1037769. 914 |

|            |              |          |              |
|------------|--------------|----------|--------------|
| M675T321_2 | 675. 209356  | 321. 312 | 1275203. 221 |
| M675T332_2 | 675. 2044843 | 332. 105 | 731234. 1045 |
| M675T303_2 | 675. 2050442 | 303. 259 | 10023934. 36 |
| M675T221   | 675. 2128619 | 221. 453 | 431928. 5241 |
| M675T418_1 | 675. 2877321 | 417. 689 | 519568. 767  |
| M675T418_2 | 675. 2995556 | 417. 689 | 855214. 7401 |
| M676T179_1 | 675. 6833246 | 179. 046 | 264585. 1595 |
| M676T179_2 | 675. 6980927 | 179. 046 | 288592. 6902 |
| M676T480_1 | 675. 8286547 | 479. 541 | 274231. 1149 |
| M676T480_2 | 675. 8450857 | 479. 541 | 368520. 229  |
| M676T303_1 | 676. 1959868 | 303. 259 | 3291001. 46  |
| M676T303_2 | 676. 2084729 | 303. 259 | 2370792. 348 |
| M676T835_1 | 676. 4844615 | 835. 329 | 2132189. 943 |
| M676T807   | 676. 4963054 | 806. 698 | 1947407. 726 |
| M676T835_2 | 676. 4966255 | 835. 329 | 1533505. 469 |
| M677T81_1  | 677. 1695129 | 80. 6174 | 13293748. 19 |
| M677T81_2  | 677. 1809943 | 80. 6174 | 14593735. 74 |
| M677T296   | 677. 1831937 | 295. 704 | 358394. 6466 |
| M677T95_1  | 677. 2595    | 95. 2383 | 24234231. 67 |
| M677T95_2  | 677. 2733765 | 95. 2383 | 73566768. 97 |
| M678T81    | 678. 1757743 | 80. 6174 | 3495398. 982 |
| M678T95    | 678. 2821119 | 95. 2383 | 9704391. 855 |
| M679T167_1 | 679. 1955841 | 167. 01  | 17065123. 93 |
| M679T293_1 | 679. 1951364 | 292. 621 | 38700701. 9  |
| M679T202_1 | 679. 1943396 | 201. 897 | 18743311. 35 |
| M679T158   | 679. 1957872 | 158. 1   | 9877638. 622 |
| M679T107_1 | 679. 1955893 | 106. 648 | 37583430. 52 |
| M679T179_1 | 679. 193793  | 179. 046 | 55833754. 74 |
| M679T130_1 | 679. 1957058 | 129. 827 | 8135854. 092 |
| M679T252   | 679. 1956488 | 251. 727 | 9211220. 955 |
| M679T146_1 | 679. 1957811 | 146. 08  | 5548461. 774 |
| M679T238   | 679. 1938755 | 238. 024 | 22855230. 48 |
| M679T218   | 679. 1957293 | 218. 43  | 9322472. 592 |
| M679T167_2 | 679. 2081733 | 167. 01  | 51176838. 15 |
| M679T293_2 | 679. 2080055 | 292. 621 | 120930589. 8 |
| M679T202_2 | 679. 2080623 | 201. 897 | 57320611. 1  |
| M679T107_2 | 679. 2081782 | 106. 648 | 112929268. 6 |
| M679T179_2 | 679. 2081234 | 179. 046 | 166574352. 2 |
| M679T130_2 | 679. 2082815 | 129. 827 | 24203991. 43 |
| M679T160   | 679. 208182  | 159. 635 | 29189977. 33 |
| M679T146_2 | 679. 2078288 | 146. 08  | 16865651. 84 |
| M679T240_1 | 679. 208147  | 239. 574 | 104708391. 1 |
| M679T147   | 679. 2246239 | 147. 455 | 4497068. 235 |
| M679T293_3 | 679. 2247934 | 292. 621 | 35172896. 84 |
| M679T202_3 | 679. 2248486 | 201. 897 | 16155410. 76 |
| M679T107_3 | 679. 2249638 | 106. 648 | 30980517. 52 |
| M679T179_3 | 679. 2249295 | 179. 046 | 61629876. 1  |
| M679T130_3 | 679. 2250282 | 129. 827 | 8710747. 586 |
| M679T240_2 | 679. 2249319 | 239. 574 | 28032577. 91 |
| M679T276   | 679. 2292458 | 276. 104 | 197349. 6908 |
| M679T614   | 679. 4479829 | 613. 824 | 27160327. 94 |
| M680T255   | 679. 694057  | 255. 113 | 1211330. 351 |
| M680T251_1 | 679. 6993632 | 251. 004 | 6736938. 129 |
| M680T293_1 | 679. 6987354 | 292. 621 | 31045019. 17 |

|            |              |          |              |
|------------|--------------|----------|--------------|
| M680T202_1 | 679. 698466  | 201. 897 | 14064661. 11 |
| M680T268_1 | 679. 6983336 | 268. 419 | 559546. 9085 |
| M680T107_1 | 679. 6973237 | 106. 648 | 28462722. 47 |
| M680T128_1 | 679. 6985698 | 128. 279 | 7822552. 052 |
| M680T179_1 | 679. 6981521 | 179. 046 | 46066168. 61 |
| M680T276_1 | 679. 6987376 | 275. 643 | 268513. 4899 |
| M680T164   | 679. 6992907 | 164. 077 | 21170366. 65 |
| M680T217_1 | 679. 699147  | 216. 95  | 6898310. 776 |
| M680T146_1 | 679. 6984559 | 146. 08  | 3468423. 858 |
| M680T238_1 | 679. 6993797 | 238. 024 | 17305763. 04 |
| M680T163   | 679. 7161159 | 162. 615 | 39951520. 62 |
| M680T293_2 | 679. 7161099 | 292. 621 | 62836587. 28 |
| M680T202_2 | 679. 7161442 | 201. 897 | 27674251. 19 |
| M680T268_2 | 679. 7165226 | 268. 419 | 1040486. 027 |
| M680T251_2 | 679. 7161669 | 251. 004 | 17002888. 01 |
| M680T107_2 | 679. 7160906 | 106. 648 | 56894202. 7  |
| M680T128_2 | 679. 7162562 | 128. 279 | 15009960. 47 |
| M680T179_2 | 679. 7161633 | 179. 046 | 87062190. 74 |
| M680T276_2 | 679. 7159833 | 275. 643 | 500848. 6356 |
| M680T217_2 | 679. 716359  | 216. 95  | 13100043. 7  |
| M680T146_2 | 679. 7162939 | 146. 08  | 6926855. 177 |
| M680T238_2 | 679. 7161839 | 238. 024 | 32561487. 08 |
| M680T293_3 | 679. 7302901 | 292. 621 | 4928114. 077 |
| M680T202_3 | 679. 7266349 | 201. 897 | 11924409. 75 |
| M680T238_3 | 679. 7266867 | 238. 024 | 12068229. 19 |
| M680T293_4 | 680. 199344  | 292. 621 | 9840496. 878 |
| M680T251_3 | 680. 1987067 | 251. 004 | 2532030. 773 |
| M680T108_1 | 680. 2030199 | 108. 082 | 14241819. 69 |
| M680T202_4 | 680. 2080175 | 201. 897 | 11333511. 66 |
| M680T179_3 | 680. 2081128 | 179. 046 | 36676097. 79 |
| M680T238_4 | 680. 2082042 | 238. 024 | 14425100. 7  |
| M680T293_5 | 680. 2122485 | 292. 621 | 29028192. 11 |
| M680T108_2 | 680. 2165802 | 108. 082 | 25543889. 43 |
| M680T202_5 | 680. 2206335 | 201. 897 | 8957843. 606 |
| M680T251_4 | 680. 2262258 | 251. 004 | 2665209. 116 |
| M680T179_4 | 680. 2207307 | 179. 046 | 29096650. 12 |
| M680T238_5 | 680. 2208189 | 238. 024 | 11378790. 66 |
| M680T293_6 | 680. 2291895 | 292. 621 | 3350640. 493 |
| M680T615_1 | 680. 3175696 | 615. 38  | 22253122. 34 |
| M680T637_1 | 680. 3173653 | 636. 925 | 9054116. 387 |
| M680T628_1 | 680. 3177099 | 627. 731 | 6602917. 455 |
| M680T615_2 | 680. 3336533 | 615. 38  | 14836616. 12 |
| M680T637_2 | 680. 3341953 | 636. 925 | 6143052. 482 |
| M680T628_2 | 680. 3332398 | 627. 731 | 4195330. 167 |
| M681T107_1 | 680. 7064222 | 106. 648 | 5887008. 8   |
| M681T179_1 | 680. 7047525 | 179. 046 | 8731405. 6   |
| M681T293_1 | 680. 7088454 | 292. 621 | 7529025. 091 |
| M681T202_1 | 680. 709026  | 201. 897 | 4040493. 512 |
| M681T107_2 | 680. 7215703 | 106. 648 | 6158375. 222 |
| M681T179_2 | 680. 7215932 | 179. 046 | 9744196. 806 |
| M681T293_2 | 680. 7214769 | 292. 621 | 6590501. 092 |
| M681T202_2 | 680. 7216631 | 201. 897 | 3316474. 167 |
| M681T238   | 680. 7232921 | 238. 024 | 3328134. 173 |
| M681T615_1 | 680. 8142236 | 615. 38  | 10287919. 85 |

|            |              |          |              |
|------------|--------------|----------|--------------|
| M681T615_2 | 680. 8310666 | 615. 38  | 16633705. 2  |
| M681T75_1  | 680. 8868823 | 74. 6705 | 4451207. 273 |
| M681T75_2  | 680. 9013027 | 74. 6705 | 5411973. 03  |
| M681T100   | 681. 2005642 | 100. 283 | 7895255. 923 |
| M681T293_3 | 681. 2088635 | 292. 621 | 1615249. 976 |
| M681T241   | 681. 205213  | 240. 733 | 796233. 1307 |
| M681T99    | 681. 2144044 | 98. 9649 | 8234507. 009 |
| M681T107_3 | 681. 2142218 | 106. 648 | 3518694. 25  |
| M681T179_3 | 681. 2106894 | 179. 046 | 3068635. 451 |
| M681T293_4 | 681. 2223068 | 292. 621 | 1581742. 033 |
| M681T202_3 | 681. 2188723 | 201. 897 | 900489. 1177 |
| M681T179_4 | 681. 2233274 | 179. 046 | 2493791. 104 |
| M681T615_3 | 681. 3122206 | 615. 38  | 2199525. 265 |
| M681T615_4 | 681. 3241901 | 615. 38  | 7845617. 755 |
| M681T635   | 681. 3366298 | 635. 37  | 3214880. 841 |
| M681T615_5 | 681. 3406583 | 615. 38  | 2571039. 051 |
| M681T762_1 | 681. 4045161 | 762. 482 | 2651605. 616 |
| M681T723_1 | 681. 4083467 | 722. 604 | 1254351. 253 |
| M681T710_1 | 681. 4067242 | 710. 246 | 1384427. 934 |
| M681T762_2 | 681. 4171652 | 762. 482 | 8899246. 201 |
| M681T723_2 | 681. 4255075 | 722. 604 | 1934440. 387 |
| M681T710_2 | 681. 425352  | 710. 246 | 2171149. 642 |
| M681T762_3 | 681. 436247  | 762. 482 | 2606767. 895 |
| M682T293   | 681. 7251044 | 292. 621 | 397607. 4005 |
| M682T487   | 682. 3569914 | 487. 329 | 240630. 8253 |
| M682T635   | 682. 3770262 | 635. 37  | 1314213. 475 |
| M682T634   | 682. 3915442 | 633. 832 | 2004753. 462 |
| M682T710_1 | 682. 4142415 | 710. 246 | 599328. 1035 |
| M682T710_2 | 682. 4305813 | 710. 246 | 684040. 4968 |
| M683T95_1  | 682. 6298164 | 95. 2383 | 2632952. 223 |
| M683T95_2  | 682. 6456938 | 95. 2383 | 4677306. 297 |
| M683T486   | 682. 8523183 | 485. 784 | 387051. 6217 |
| M683T164_1 | 683. 1723893 | 164. 077 | 1265463. 308 |
| M683T164_2 | 683. 183536  | 164. 077 | 1502102. 373 |
| M683T102_1 | 683. 2082312 | 101. 563 | 328436085    |
| M683T95_3  | 683. 207812  | 95. 2383 | 631088349. 8 |
| M683T102_2 | 683. 2237173 | 101. 563 | 1110486679   |
| M683T94_1  | 683. 223761  | 94. 1615 | 2583637769   |
| M683T94_2  | 683. 2385806 | 94. 1615 | 720803790. 5 |
| M683T102_3 | 683. 24699   | 101. 563 | 37458331. 45 |
| M683T634   | 683. 3821568 | 633. 832 | 367961. 3533 |
| M683T694_1 | 683. 4122583 | 694. 341 | 13890364. 49 |
| M683T720_1 | 683. 4250507 | 719. 505 | 36950647. 48 |
| M683T694_2 | 683. 424968  | 694. 341 | 182261505. 7 |
| M683T786   | 683. 4328703 | 785. 593 | 884681. 2652 |
| M683T720_2 | 683. 4419947 | 719. 505 | 49298563. 45 |
| M683T694_3 | 683. 4419139 | 694. 341 | 251591201. 1 |
| M683T694_4 | 683. 4525056 | 694. 341 | 88426761. 73 |
| M684T693   | 684. 0222657 | 692. 781 | 762096. 275  |
| M684T166   | 684. 1870916 | 165. 522 | 350611. 1118 |
| M684T102_1 | 684. 2155391 | 101. 563 | 148862431. 5 |
| M684T94_1  | 684. 2156155 | 94. 1615 | 338548740. 3 |
| M684T102_2 | 684. 232493  | 101. 563 | 236865881. 7 |
| M684T94_2  | 684. 2325905 | 94. 1615 | 540155434    |



|            |              |          |              |
|------------|--------------|----------|--------------|
| M684T102_3 | 684. 2431122 | 101. 563 | 65425159. 75 |
| M684T594_1 | 684. 3026818 | 593. 841 | 305764. 4796 |
| M684T594_2 | 684. 313294  | 593. 841 | 273962. 0208 |
| M684T694_1 | 684. 4195023 | 694. 341 | 24658649. 7  |
| M684T694_2 | 684. 4353929 | 694. 341 | 110802448. 5 |
| M684T694_3 | 684. 4470332 | 694. 341 | 86474097. 18 |
| M685T694_1 | 685. 0194873 | 694. 341 | 181766. 8775 |
| M685T102_1 | 685. 2159031 | 101. 563 | 49208783. 41 |
| M685T94_1  | 685. 2180699 | 94. 1615 | 107767317. 8 |
| M685T102_2 | 685. 2350337 | 101. 563 | 64790727. 61 |
| M685T94_2  | 685. 2350821 | 94. 1615 | 150981202. 8 |
| M685T586_1 | 685. 3018994 | 586. 044 | 1527335. 863 |
| M685T586_2 | 685. 3181932 | 586. 044 | 5018712. 426 |
| M685T694_2 | 685. 4372644 | 694. 341 | 28712081. 31 |
| M685T694_3 | 685. 4480155 | 694. 341 | 20985489. 5  |
| M686T586_1 | 685. 8062403 | 586. 044 | 1255711. 696 |
| M686T467   | 686. 181731  | 467. 127 | 387465. 5619 |
| M686T518_1 | 686. 1863311 | 518. 474 | 1418314. 038 |
| M686T466   | 686. 1984732 | 465. 575 | 526306. 9844 |
| M686T518_2 | 686. 1977492 | 518. 474 | 1251019. 022 |
| M686T102   | 686. 2338008 | 101. 563 | 19595131. 03 |
| M686T94    | 686. 234971  | 94. 1615 | 36688138. 15 |
| M686T601_1 | 686. 3150812 | 601. 473 | 1994120. 212 |
| M686T586_2 | 686. 3148725 | 586. 044 | 2788023. 714 |
| M686T601_2 | 686. 3278735 | 601. 473 | 2436161. 232 |
| M686T586_3 | 686. 3276206 | 586. 044 | 3024504. 31  |
| M687T601   | 686. 8144987 | 601. 473 | 710406. 8933 |
| M687T586_1 | 686. 8152143 | 586. 044 | 951483. 02   |
| M687T586_2 | 686. 8317283 | 586. 044 | 1296211. 909 |
| M687T687   | 687. 127632  | 687. 214 | 179733. 9739 |
| M687T151_1 | 687. 1762461 | 150. 528 | 3213285. 142 |
| M687T151_2 | 687. 1890576 | 150. 528 | 2704879. 905 |
| M687T525   | 687. 2852573 | 524. 56  | 1326620. 836 |
| M688T525   | 687. 7868592 | 524. 56  | 996110. 274  |
| M688T151   | 688. 1793957 | 150. 528 | 912215. 1666 |
| M688T149   | 688. 1900983 | 148. 981 | 854027. 0198 |
| M689T69    | 689. 1365659 | 69. 1983 | 653783. 7438 |
| M689T369_1 | 689. 2290448 | 368. 559 | 1088449. 905 |
| M689T369_2 | 689. 2460567 | 368. 559 | 1386112. 896 |
| M689T495_1 | 689. 2930034 | 495. 125 | 449413. 3434 |
| M689T495_2 | 689. 306553  | 495. 125 | 752801. 5104 |
| M690T495   | 689. 7932448 | 495. 125 | 252454. 91   |
| M690T473   | 689. 8448672 | 473. 329 | 270842. 1707 |
| M690T181   | 690. 1877674 | 180. 601 | 445526. 8335 |
| M690T369_1 | 690. 231417  | 368. 559 | 296540. 6467 |
| M690T369_2 | 690. 2495093 | 368. 559 | 421871. 0616 |
| M691T293_1 | 690. 6966763 | 292. 621 | 449306. 882  |
| M691T293_2 | 690. 7099129 | 292. 621 | 296846. 2018 |
| M691T179   | 691. 1913155 | 179. 046 | 420965. 0908 |
| M691T181   | 691. 2042334 | 180. 601 | 400647. 7404 |
| M692T293_1 | 692. 1760164 | 292. 621 | 2334672. 236 |
| M692T303_1 | 692. 1764842 | 303. 259 | 1167891. 298 |
| M692T293_2 | 692. 1924674 | 292. 621 | 2974167. 12  |
| M692T179   | 692. 1906002 | 179. 046 | 225512. 1022 |

|            |              |          |              |
|------------|--------------|----------|--------------|
| M692T303_2 | 692. 1927028 | 303. 259 | 1710275. 464 |
| M693T549_1 | 693. 1873601 | 549. 371 | 5385823. 752 |
| M693T166_1 | 693. 1946548 | 165. 522 | 20390401. 86 |
| M693T107_1 | 693. 1942282 | 106. 648 | 17260143. 65 |
| M693T131   | 693. 1894116 | 131. 207 | 1896356. 07  |
| M693T146_1 | 693. 1942629 | 146. 08  | 10303153. 1  |
| M693T223_1 | 693. 1957542 | 222. 943 | 5060439. 45  |
| M693T212_1 | 693. 1956762 | 212. 366 | 3242522. 557 |
| M693T197_1 | 693. 1958258 | 197. 335 | 4017296. 658 |
| M693T176_1 | 693. 1957358 | 176. 104 | 5631579. 078 |
| M693T241_1 | 693. 1956976 | 240. 733 | 8364191. 239 |
| M693T549_2 | 693. 204453  | 549. 371 | 14153221. 66 |
| M693T166_2 | 693. 2129782 | 165. 522 | 32090157. 05 |
| M693T223_2 | 693. 2130628 | 222. 943 | 7984012. 18  |
| M693T212_2 | 693. 2129708 | 212. 366 | 4604693. 67  |
| M693T107_2 | 693. 2127381 | 106. 648 | 27885185. 24 |
| M693T197_2 | 693. 2131303 | 197. 335 | 6944341. 646 |
| M693T176_2 | 693. 2130445 | 176. 104 | 8832492. 533 |
| M693T241_2 | 693. 2129452 | 240. 733 | 12858656. 75 |
| M693T146_2 | 693. 2131152 | 146. 08  | 16502562. 78 |
| M693T296   | 693. 2165009 | 295. 704 | 4152775. 918 |
| M693T549_3 | 693. 2174305 | 549. 371 | 3518305. 229 |
| M693T176_3 | 693. 2238027 | 176. 104 | 3262199. 272 |
| M693T241_3 | 693. 2248493 | 240. 733 | 4847914. 302 |
| M693T508_1 | 693. 2987333 | 507. 55  | 781379. 965  |
| M693T508_2 | 693. 3134109 | 507. 55  | 1691908. 166 |
| M694T297_1 | 693. 703622  | 297. 149 | 2041089. 487 |
| M694T224_1 | 693. 7023924 | 224. 484 | 3734033. 853 |
| M694T297_2 | 693. 716491  | 297. 149 | 2066916. 271 |
| M694T224_2 | 693. 7153883 | 224. 484 | 3692361. 692 |
| M694T549_1 | 694. 1922439 | 549. 371 | 2460109. 518 |
| M694T176_1 | 694. 1961837 | 176. 104 | 1164128. 053 |
| M694T166_1 | 694. 2052856 | 165. 522 | 9545357. 357 |
| M694T107_1 | 694. 2044477 | 106. 648 | 6254038. 866 |
| M694T241_1 | 694. 200896  | 240. 733 | 6663398. 803 |
| M694T146_1 | 694. 2052158 | 146. 08  | 4553450. 52  |
| M694T296_1 | 694. 2021951 | 295. 704 | 1135245. 05  |
| M694T166_2 | 694. 2161271 | 165. 522 | 8155160. 857 |
| M694T223   | 694. 2179852 | 222. 943 | 2015975. 497 |
| M694T107_2 | 694. 2179202 | 106. 648 | 6414112. 702 |
| M694T197   | 694. 2184208 | 197. 335 | 1715453. 697 |
| M694T176_2 | 694. 217223  | 176. 104 | 2648657. 768 |
| M694T549_2 | 694. 2203115 | 549. 371 | 818370. 5943 |
| M694T241_2 | 694. 2180469 | 240. 733 | 3277279. 326 |
| M694T146_2 | 694. 2160585 | 146. 08  | 3961742. 209 |
| M694T296_2 | 694. 2176898 | 295. 704 | 1282318. 096 |
| M694T166_3 | 694. 2288278 | 165. 522 | 2289173. 605 |
| M694T146_3 | 694. 2290635 | 146. 08  | 1431464. 374 |
| M694T730   | 694. 2619496 | 730. 264 | 216921. 6217 |
| M695T166_1 | 695. 2027191 | 165. 522 | 1915890. 847 |
| M695T107   | 695. 211587  | 106. 648 | 1608322. 516 |
| M695T176   | 695. 2115161 | 176. 104 | 838109. 1335 |
| M695T241   | 695. 2121768 | 240. 733 | 991638. 7274 |
| M695T166_2 | 695. 2157724 | 165. 522 | 3195517. 032 |

|            |              |          |              |
|------------|--------------|----------|--------------|
| M696T495   | 696. 3113683 | 495. 125 | 322456. 6632 |
| M696T450   | 696. 3635284 | 450. 052 | 199317. 8095 |
| M696T452   | 696. 377047  | 451. 616 | 59284. 62746 |
| M697T473   | 696. 7875191 | 473. 329 | 191784. 0052 |
| M697T179_1 | 697. 189488  | 179. 046 | 1860192. 797 |
| M697T237_1 | 697. 1944992 | 236. 518 | 1404597. 805 |
| M697T254_1 | 697. 1945983 | 253. 674 | 917026. 8008 |
| M697T179_2 | 697. 2053878 | 179. 046 | 1801477. 714 |
| M697T237_2 | 697. 2075039 | 236. 518 | 635249. 6853 |
| M697T254_2 | 697. 2070606 | 253. 674 | 687781. 7501 |
| M697T486   | 697. 3044131 | 485. 784 | 578247. 9421 |
| M697T620   | 697. 4034757 | 619. 986 | 322387. 8509 |
| M698T293_1 | 697. 6889796 | 292. 621 | 493422. 7688 |
| M698T249   | 697. 7031624 | 249. 466 | 292670. 1449 |
| M698T255   | 697. 7032216 | 255. 113 | 149376. 4954 |
| M698T293_2 | 697. 7058849 | 292. 621 | 787992. 4344 |
| M698T240   | 697. 7032744 | 239. 574 | 650587. 6342 |
| M698T181   | 698. 1741559 | 180. 601 | 2349960. 989 |
| M698T251   | 698. 1792378 | 251. 004 | 560294. 7607 |
| M698T237_1 | 698. 1796845 | 236. 518 | 2177926. 438 |
| M698T293_3 | 698. 1903399 | 292. 621 | 1781604. 754 |
| M698T179   | 698. 1907092 | 179. 046 | 2453230. 463 |
| M698T237_2 | 698. 1957465 | 236. 518 | 757063. 6282 |
| M699T179_1 | 698. 6778607 | 179. 046 | 1329681. 745 |
| M699T240   | 698. 67781   | 239. 574 | 1043301. 63  |
| M699T179_2 | 698. 6942138 | 179. 046 | 1020890. 834 |
| M699T33_1  | 698. 8957757 | 32. 8715 | 1786182. 066 |
| M699T33_2  | 698. 9131175 | 32. 8715 | 3545328. 931 |
| M699T402   | 699. 3619971 | 402. 144 | 115389. 1121 |
| M699T557_1 | 699. 4174469 | 557. 078 | 1761296. 711 |
| M699T548_1 | 699. 4173207 | 547. 805 | 1526555. 969 |
| M699T677   | 699. 4171679 | 676. 878 | 1149917. 817 |
| M699T597   | 699. 4237229 | 596. 795 | 2967265. 309 |
| M699T557_2 | 699. 4321844 | 557. 078 | 3713922. 245 |
| M699T675   | 699. 4327512 | 675. 322 | 2353171. 878 |
| M699T548_2 | 699. 4326693 | 547. 805 | 3017297. 971 |
| M699T595   | 699. 4369281 | 595. 35  | 2237246. 291 |
| M700T33_1  | 699. 903878  | 32. 8715 | 450808. 2384 |
| M700T33_2  | 699. 9193322 | 32. 8715 | 392749. 2376 |
| M700T315   | 700. 2094731 | 315. 162 | 460318. 3305 |
| M700T317   | 700. 2226503 | 316. 709 | 400571. 454  |
| M700T588_1 | 700. 3129272 | 587. 595 | 731218. 6566 |
| M700T588_2 | 700. 3264988 | 587. 595 | 937690. 4656 |
| M700T597   | 700. 3258273 | 596. 795 | 324823. 8926 |
| M700T694_1 | 700. 4008789 | 694. 341 | 1946909. 904 |
| M700T694_2 | 700. 4159242 | 694. 341 | 30261209. 23 |
| M700T829   | 700. 4116399 | 829. 321 | 248985. 5973 |
| M700T595   | 700. 4243481 | 595. 35  | 691302. 1933 |
| M700T694_3 | 700. 4335058 | 694. 341 | 32797323. 95 |
| M700T694_4 | 700. 4488906 | 694. 341 | 2409107. 281 |
| M701T119   | 701. 1791376 | 119. 413 | 1245285. 943 |
| M701T157_1 | 701. 1796021 | 156. 582 | 6690761. 86  |
| M701T107_1 | 701. 1789623 | 106. 648 | 11289677. 81 |
| M701T149_1 | 701. 179304  | 148. 981 | 16712356. 39 |

|            |              |          |              |
|------------|--------------|----------|--------------|
| M701T131_1 | 701. 1817473 | 131. 207 | 1718345. 428 |
| M701T121   | 701. 1967856 | 120. 945 | 1629961. 352 |
| M701T157_2 | 701. 1972098 | 156. 582 | 7288853. 033 |
| M701T107_2 | 701. 1965704 | 106. 648 | 13717356. 01 |
| M701T149_2 | 701. 1969101 | 148. 981 | 19138191. 25 |
| M701T131_2 | 701. 1966932 | 131. 207 | 1722782. 618 |
| M701T151   | 701. 2099955 | 150. 528 | 2145167. 901 |
| M701T694_1 | 701. 4106779 | 694. 341 | 6131667. 254 |
| M701T694_2 | 701. 4278997 | 694. 341 | 19954737. 48 |
| M701T694_3 | 701. 4433571 | 694. 341 | 6957304. 074 |
| M702T835   | 701. 5398917 | 835. 329 | 491838. 3226 |
| M702T293_1 | 702. 1949644 | 292. 621 | 25631131. 7  |
| M702T202_1 | 702. 1950466 | 201. 897 | 15687292. 36 |
| M702T179_1 | 702. 195132  | 179. 046 | 32685576. 08 |
| M702T151   | 702. 193105  | 150. 528 | 11408160. 77 |
| M702T251   | 702. 1973876 | 251. 004 | 30640748. 46 |
| M702T107_1 | 702. 196552  | 106. 648 | 18885794. 64 |
| M702T293_2 | 702. 2104058 | 292. 621 | 82050934. 79 |
| M702T202_2 | 702. 2104852 | 201. 897 | 49508021. 97 |
| M702T278_1 | 702. 2104293 | 278. 267 | 2144882. 349 |
| M702T269   | 702. 2108769 | 269. 337 | 421806. 322  |
| M702T163   | 702. 2108064 | 162. 615 | 20771644. 16 |
| M702T127   | 702. 2107216 | 126. 755 | 24969117. 27 |
| M702T107_2 | 702. 2111491 | 106. 648 | 56198210. 09 |
| M702T179_2 | 702. 2105705 | 179. 046 | 98965229. 72 |
| M702T240   | 702. 2105354 | 239. 574 | 47086469. 6  |
| M702T275   | 702. 2110833 | 274. 794 | 538441. 8013 |
| M702T252_1 | 702. 2194862 | 251. 727 | 27653445. 73 |
| M702T274   | 702. 2306076 | 273. 82  | 118776. 718  |
| M702T278_2 | 702. 2299306 | 278. 267 | 526154. 3764 |
| M702T293_3 | 702. 2280531 | 292. 621 | 24715005. 35 |
| M702T202_3 | 702. 2281297 | 201. 897 | 14599059. 08 |
| M702T107_3 | 702. 2260174 | 106. 648 | 17936882. 72 |
| M702T179_3 | 702. 2282143 | 179. 046 | 27779099     |
| M702T238   | 702. 2328661 | 238. 024 | 12116557. 85 |
| M702T252_2 | 702. 2305135 | 251. 727 | 9304062. 409 |
| M702T694   | 702. 4376445 | 694. 341 | 3797347. 372 |
| M703T122_1 | 702. 7046571 | 122. 381 | 5123197. 591 |
| M703T293_1 | 702. 7048275 | 292. 621 | 32002457. 02 |
| M703T202_1 | 702. 7048919 | 201. 897 | 18720333     |
| M703T251   | 702. 7049855 | 251. 004 | 13898606. 19 |
| M703T107_1 | 702. 7049261 | 106. 648 | 23144725. 38 |
| M703T179_1 | 702. 7049736 | 179. 046 | 39992734. 84 |
| M703T130_1 | 702. 7048927 | 129. 827 | 4893578. 644 |
| M703T240_1 | 702. 7048683 | 239. 574 | 18422579. 01 |
| M703T249_1 | 702. 7226738 | 249. 466 | 38512945. 92 |
| M703T122_2 | 702. 7223101 | 122. 381 | 5347608. 143 |
| M703T293_2 | 702. 7224955 | 292. 621 | 34820167. 47 |
| M703T202_2 | 702. 7225589 | 201. 897 | 20097443. 39 |
| M703T107_2 | 702. 7225915 | 106. 648 | 24804154. 17 |
| M703T179_2 | 702. 7226386 | 179. 046 | 40887821. 23 |
| M703T130_2 | 702. 7220799 | 129. 827 | 5222948. 135 |
| M703T241   | 702. 7414638 | 240. 733 | 1753570. 525 |
| M703T106   | 703. 1799245 | 105. 537 | 4151582. 481 |

|            |              |          |              |
|------------|--------------|----------|--------------|
| M703T151_1 | 703. 1819904 | 150. 528 | 10606102. 29 |
| M703T249_2 | 703. 2000851 | 249. 466 | 2061571. 997 |
| M703T255   | 703. 1999396 | 254. 651 | 1241895. 133 |
| M703T202_3 | 703. 1970388 | 201. 897 | 3540634. 978 |
| M703T107_3 | 703. 1997713 | 106. 648 | 6071191. 212 |
| M703T179_3 | 703. 1960465 | 179. 046 | 8091342. 159 |
| M703T151_2 | 703. 1996596 | 150. 528 | 6374965. 692 |
| M703T240_2 | 703. 1999538 | 239. 574 | 3667181. 442 |
| M703T293_3 | 703. 2085699 | 292. 621 | 17367693. 08 |
| M703T107_4 | 703. 2152002 | 106. 648 | 12961021. 52 |
| M703T202_4 | 703. 2219422 | 201. 897 | 10115183. 12 |
| M703T179_4 | 703. 2220935 | 179. 046 | 21328148. 1  |
| M703T240_3 | 703. 2220478 | 239. 574 | 9751386. 836 |
| M703T293_4 | 703. 2218332 | 292. 621 | 17622095. 22 |
| M703T293_5 | 703. 2333161 | 292. 621 | 1796029. 201 |
| M703T665_1 | 703. 3792576 | 664. 565 | 1136701. 947 |
| M703T665_2 | 703. 3947775 | 664. 565 | 1721138. 64  |
| M704T835   | 703. 5427991 | 835. 329 | 539622. 3726 |
| M704T837   | 703. 5563765 | 836. 769 | 443985. 0059 |
| M704T179_1 | 703. 7084781 | 179. 046 | 6120437. 559 |
| M704T246   | 703. 7086081 | 246. 474 | 5625843. 173 |
| M704T108_1 | 703. 7080353 | 108. 082 | 3325012. 904 |
| M704T202_1 | 703. 7132642 | 201. 897 | 3672801. 953 |
| M704T249   | 703. 7220754 | 249. 466 | 3601971. 745 |
| M704T179_2 | 703. 7242888 | 179. 046 | 5332899. 804 |
| M704T238   | 703. 7215788 | 238. 024 | 2532330. 179 |
| M704T108_2 | 703. 7235357 | 108. 082 | 3226294. 007 |
| M704T202_2 | 703. 7260258 | 201. 897 | 2603992. 148 |
| M704T151   | 704. 1977713 | 150. 528 | 1893457. 631 |
| M704T293_1 | 704. 2079089 | 292. 621 | 931005. 8569 |
| M704T179_3 | 704. 2104723 | 179. 046 | 1438988. 021 |
| M704T241   | 704. 211228  | 240. 733 | 520443. 8397 |
| M704T252   | 704. 2116217 | 251. 727 | 397565. 011  |
| M704T293_2 | 704. 2234214 | 292. 621 | 1490072. 303 |
| M705T446_1 | 704. 8270409 | 445. 522 | 514509. 2967 |
| M705T446_2 | 704. 8442502 | 445. 522 | 723471. 4934 |
| M705T102   | 705. 1839993 | 101. 563 | 17307928. 54 |
| M705T293   | 705. 1839606 | 292. 621 | 1020339. 282 |
| M705T179_1 | 705. 1869926 | 179. 046 | 1977338. 253 |
| M705T93    | 705. 1830535 | 92. 9618 | 8022201. 535 |
| M705T240_1 | 705. 1848384 | 239. 574 | 652701. 492  |
| M705T179_2 | 705. 2003379 | 179. 046 | 1322990. 215 |
| M705T240_2 | 705. 1985552 | 239. 574 | 661195. 0728 |
| M705T469   | 705. 3206349 | 468. 69  | 1471048. 618 |
| M706T293_1 | 705. 6894608 | 292. 621 | 795202. 3876 |
| M706T293_2 | 705. 7027962 | 292. 621 | 498496. 0247 |
| M707T318   | 707. 2163496 | 318. 232 | 359419. 6863 |
| M707T594   | 707. 3188704 | 593. 841 | 972594. 5132 |
| M708T594_1 | 707. 8096958 | 593. 841 | 1075389. 258 |
| M708T744_1 | 708. 1942241 | 744. 192 | 239922. 4392 |
| M708T744_2 | 708. 2084893 | 744. 192 | 297774. 7748 |
| M708T594_2 | 708. 3053671 | 593. 841 | 345714. 8728 |
| M709T808_1 | 708. 9271439 | 808. 251 | 1168532. 663 |
| M709T808_2 | 708. 9407082 | 808. 251 | 2090289. 629 |

|            |              |          |              |
|------------|--------------|----------|--------------|
| M710T526   | 709. 8294712 | 526. 124 | 614652. 8467 |
| M710T242_1 | 710. 190423  | 242. 223 | 1021245. 755 |
| M710T164   | 710. 1874997 | 164. 077 | 3069139. 681 |
| M710T294   | 710. 1933868 | 294. 152 | 518849. 2961 |
| M710T199   | 710. 1934189 | 198. 821 | 1622486. 571 |
| M710T166   | 710. 2026072 | 165. 522 | 5310273. 797 |
| M710T242_2 | 710. 2030469 | 242. 223 | 1191370. 574 |
| M710T108   | 710. 2002238 | 108. 082 | 2033132. 795 |
| M710T103   | 710. 2425756 | 102. 948 | 3554654. 795 |
| M711T242   | 711. 1975674 | 242. 223 | 122964. 3703 |
| M711T106_1 | 711. 2064114 | 105. 537 | 316548587. 1 |
| M711T157_1 | 711. 2069929 | 156. 582 | 150036511    |
| M711T149_1 | 711. 2066752 | 148. 981 | 291065841. 2 |
| M711T130_1 | 711. 2065388 | 129. 827 | 32531779. 05 |
| M711T106_2 | 711. 2244009 | 105. 537 | 518360020. 2 |
| M711T157_2 | 711. 2249799 | 156. 582 | 214711294. 6 |
| M711T149_2 | 711. 2246574 | 148. 981 | 456659157    |
| M711T130_2 | 711. 2245241 | 129. 827 | 51013284. 33 |
| M711T393   | 711. 2295572 | 392. 905 | 543615. 996  |
| M711T106_3 | 711. 2356446 | 105. 537 | 145597974. 3 |
| M711T157_3 | 711. 2384123 | 156. 582 | 55162506. 49 |
| M711T149_3 | 711. 238371  | 148. 981 | 125127215. 3 |
| M712T107   | 711. 8319964 | 106. 648 | 934560. 5351 |
| M712T453_1 | 711. 8341372 | 453. 126 | 5165218. 522 |
| M712T453_2 | 711. 8499302 | 453. 126 | 7678910. 016 |
| M712T106_1 | 712. 2013064 | 105. 537 | 45986816. 9  |
| M712T157_1 | 712. 2018737 | 156. 582 | 24011282. 79 |
| M712T149_1 | 712. 2015383 | 148. 981 | 45320317. 76 |
| M712T130_1 | 712. 2127966 | 129. 827 | 16279412. 21 |
| M712T106_2 | 712. 212569  | 105. 537 | 154792309. 1 |
| M712T157_2 | 712. 213139  | 156. 582 | 72521996. 72 |
| M712T149_2 | 712. 2127994 | 148. 981 | 145274118. 9 |
| M712T106_3 | 712. 2260894 | 105. 537 | 187376114. 7 |
| M712T157_3 | 712. 2266587 | 156. 582 | 80819191. 96 |
| M712T149_3 | 712. 226316  | 148. 981 | 169242198. 3 |
| M712T130_2 | 712. 2263115 | 129. 827 | 8691714. 684 |
| M712T157_4 | 712. 2405828 | 156. 582 | 13744220. 79 |
| M712T172   | 712. 2442707 | 171. 546 | 79802. 44391 |
| M712T149_4 | 712. 2427759 | 148. 981 | 20874966. 28 |
| M712T453_3 | 712. 336606  | 453. 126 | 3045413. 944 |
| M712T453_4 | 712. 3546398 | 453. 126 | 4089938. 555 |
| M712T655_1 | 712. 3952934 | 655. 321 | 1378600. 323 |
| M712T655_2 | 712. 4086334 | 655. 321 | 600983. 6879 |
| M712T773   | 712. 4480096 | 773. 333 | 274016. 7516 |
| M713T453_1 | 712. 8371351 | 453. 126 | 1340543. 605 |
| M713T453_2 | 712. 8551529 | 453. 126 | 2022983. 846 |
| M713T293   | 713. 193763  | 292. 621 | 1028304. 268 |
| M713T179   | 713. 1967926 | 179. 046 | 2827511. 912 |
| M713T255   | 713. 198643  | 255. 113 | 265782. 0648 |
| M713T240   | 713. 1989474 | 239. 574 | 1209603. 653 |
| M713T106_1 | 713. 2140926 | 105. 537 | 44632825. 83 |
| M713T157_1 | 713. 2169768 | 156. 582 | 19640258. 82 |
| M713T149_1 | 713. 2166049 | 148. 981 | 41405815. 52 |
| M713T106_2 | 713. 2321568 | 105. 537 | 43694816. 07 |

|            |              |          |              |
|------------|--------------|----------|--------------|
| M713T157_2 | 713. 2327836 | 156. 582 | 17133504. 4  |
| M713T128   | 713. 2316767 | 128. 279 | 4063609. 876 |
| M713T149_2 | 713. 2324021 | 148. 981 | 39303079. 08 |
| M713T453_3 | 713. 3619915 | 453. 126 | 190854. 3588 |
| M713T402   | 713. 3808813 | 402. 144 | 127151. 4001 |
| M713T655_1 | 713. 3900959 | 655. 321 | 272026. 3443 |
| M713T655_2 | 713. 4071352 | 655. 321 | 309019. 471  |
| M714T181   | 713. 6938647 | 180. 601 | 633526. 6227 |
| M714T293_1 | 713. 7043602 | 292. 621 | 914384. 9201 |
| M714T248   | 713. 7114045 | 247. 773 | 402478. 5786 |
| M714T179   | 713. 7104393 | 179. 046 | 1155140. 911 |
| M714T256   | 713. 7111261 | 255. 831 | 160172. 3964 |
| M714T240   | 713. 7111437 | 239. 574 | 630967. 7155 |
| M714T293_2 | 713. 7185868 | 292. 621 | 253487. 5553 |
| M714T106_1 | 714. 2187833 | 105. 537 | 8649420. 625 |
| M714T157_1 | 714. 2184355 | 156. 582 | 4223839. 091 |
| M714T149_1 | 714. 2200598 | 148. 981 | 8327506. 558 |
| M714T106_2 | 714. 2357732 | 105. 537 | 7224151. 297 |
| M714T157_2 | 714. 2365338 | 156. 582 | 3057401. 879 |
| M714T149_2 | 714. 2358987 | 148. 981 | 6525659. 884 |
| M717T746_1 | 717. 1624061 | 745. 747 | 771601. 3486 |
| M717T801_1 | 717. 1716506 | 800. 683 | 1293304. 934 |
| M717T746_2 | 717. 1804579 | 745. 747 | 1871244. 706 |
| M717T801_2 | 717. 1854295 | 800. 683 | 680001. 02   |
| M717T634   | 717. 3696338 | 633. 832 | 540847. 7767 |
| M718T492   | 717. 8320312 | 491. 99  | 151330. 1778 |
| M718T746_1 | 718. 1699693 | 745. 747 | 489323. 4382 |
| M718T799   | 718. 1696826 | 799. 306 | 276764. 9562 |
| M718T801   | 718. 1848461 | 800. 683 | 321020. 3309 |
| M718T746_2 | 718. 1882271 | 745. 747 | 440419. 3259 |
| M718T487   | 718. 3704456 | 487. 329 | 1455264. 501 |
| M719T487   | 718. 8782688 | 487. 329 | 221728. 4676 |
| M720T102   | 720. 205066  | 101. 563 | 1759554. 713 |
| M720T665_1 | 720. 3746658 | 664. 565 | 402208. 1149 |
| M720T665_2 | 720. 3884396 | 664. 565 | 243893. 2482 |
| M721T293_1 | 721. 1814156 | 292. 621 | 1089530. 393 |
| M721T240_1 | 721. 1795616 | 239. 574 | 843798. 2744 |
| M721T246   | 721. 1955192 | 246. 013 | 160817. 8286 |
| M721T240_2 | 721. 1956308 | 239. 574 | 433799. 5703 |
| M721T293_2 | 721. 1974852 | 292. 621 | 835184. 7082 |
| M721T179   | 721. 1976789 | 179. 046 | 1135184. 017 |
| M723T65_1  | 722. 9577076 | 65. 4825 | 77439. 73463 |
| M723T65_2  | 722. 9713495 | 65. 4825 | 44678. 28651 |
| M723T744   | 723. 1369848 | 744. 192 | 493566. 5631 |
| M723T315   | 723. 2159531 | 315. 162 | 191802. 4677 |
| M724T831   | 724. 3375998 | 830. 813 | 514905. 3842 |
| M724T832   | 724. 3514245 | 832. 338 | 618148. 9551 |
| M725T801   | 725. 1707309 | 800. 683 | 1518369. 468 |
| M725T746   | 725. 1755673 | 745. 747 | 1497642. 06  |
| M725T589   | 725. 3819592 | 589. 157 | 122661. 8246 |
| M725T614_1 | 725. 4323974 | 613. 824 | 56554685. 99 |
| M725T614_2 | 725. 4509237 | 613. 824 | 109578642    |
| M725T614_3 | 725. 4671279 | 613. 824 | 6745099. 669 |
| M726T66    | 726. 1717108 | 66. 2043 | 57030. 42876 |

|            |              |          |              |
|------------|--------------|----------|--------------|
| M726T746   | 726. 1777195 | 745. 747 | 889395. 0877 |
| M726T614_1 | 726. 4372602 | 613. 824 | 22702358. 48 |
| M726T614_2 | 726. 4550848 | 613. 824 | 38379404. 94 |
| M726T614_3 | 726. 4713244 | 613. 824 | 4435319. 944 |
| M727T65_1  | 726. 6731697 | 65. 4825 | 42263. 84985 |
| M727T65_2  | 726. 6871065 | 65. 4825 | 26385. 04813 |
| M727T746_1 | 727. 1540538 | 745. 747 | 751900. 6871 |
| M727T801_1 | 727. 1536099 | 800. 683 | 355270. 8668 |
| M727T801_2 | 727. 1654348 | 800. 683 | 485825. 0607 |
| M727T746_2 | 727. 1726281 | 745. 747 | 754966. 1864 |
| M727T453   | 727. 2353772 | 453. 126 | 463962. 1094 |
| M727T418   | 727. 3704435 | 417. 689 | 297508. 8828 |
| M727T634_1 | 727. 3796566 | 633. 832 | 12256257. 98 |
| M727T634_2 | 727. 3982631 | 633. 832 | 11453237. 99 |
| M727T693   | 727. 421653  | 692. 781 | 251691. 1187 |
| M727T614_1 | 727. 4359317 | 613. 824 | 4152292. 094 |
| M727T614_2 | 727. 4682622 | 613. 824 | 2572688. 421 |
| M728T746   | 728. 1667333 | 745. 747 | 434263. 4454 |
| M728T151_1 | 728. 1808156 | 150. 528 | 2014680. 478 |
| M728T107_1 | 728. 193927  | 106. 648 | 13851834. 4  |
| M728T130_1 | 728. 1960762 | 129. 827 | 4068993. 009 |
| M728T151_2 | 728. 194589  | 150. 528 | 27093823. 48 |
| M728T107_2 | 728. 2125463 | 106. 648 | 18080384. 78 |
| M728T130_2 | 728. 2136483 | 129. 827 | 5512507. 811 |
| M728T294   | 728. 2153145 | 294. 152 | 441748. 5743 |
| M728T151_3 | 728. 2132167 | 150. 528 | 33419550. 14 |
| M728T151_4 | 728. 2318131 | 150. 528 | 1171740. 472 |
| M728T634_1 | 728. 3760322 | 633. 832 | 1890609. 83  |
| M728T634_2 | 728. 3946769 | 633. 832 | 7676617. 068 |
| M728T634_3 | 728. 4086584 | 633. 832 | 1599528. 627 |
| M729T215   | 728. 7212117 | 215. 4   | 231011. 4079 |
| M729T151_1 | 729. 2044208 | 150. 528 | 10097151. 03 |
| M729T102_1 | 729. 2205346 | 101. 563 | 159944205. 1 |
| M729T94_1  | 729. 2206087 | 94. 1615 | 68568591. 47 |
| M729T151_2 | 729. 2274081 | 150. 528 | 4244788. 733 |
| M729T102_2 | 729. 236872  | 101. 563 | 171008720. 1 |
| M729T94_2  | 729. 2369475 | 94. 1615 | 74766271. 07 |
| M730T151_1 | 730. 2113192 | 150. 528 | 3459503. 027 |
| M730T151_2 | 730. 2277023 | 150. 528 | 1638111. 687 |
| M731T525_1 | 730. 8032396 | 524. 56  | 559915. 7384 |
| M731T525_2 | 730. 8203612 | 524. 56  | 1021175. 188 |
| M731T421   | 731. 2617981 | 420. 799 | 299774. 5383 |
| M732T455   | 732. 2744812 | 454. 645 | 160656. 389  |
| M733T157_1 | 733. 1835299 | 156. 582 | 3296190. 741 |
| M733T149   | 733. 1832583 | 148. 981 | 5462860. 32  |
| M733T543_1 | 733. 1912936 | 543. 216 | 2450771. 735 |
| M733T147   | 733. 2022957 | 147. 455 | 2837662. 659 |
| M733T543_2 | 733. 2053486 | 543. 216 | 1811618. 52  |
| M733T157_2 | 733. 2007335 | 156. 582 | 1204885. 58  |
| M734T147_1 | 734. 188161  | 147. 455 | 1993759. 653 |
| M734T157   | 734. 1888403 | 156. 582 | 1256099. 993 |
| M734T147_2 | 734. 1999637 | 147. 455 | 1560714. 511 |
| M734T158   | 734. 2037968 | 158. 1   | 274128. 0478 |
| M735T598_1 | 735. 2027542 | 598. 341 | 1516882. 497 |



|            |              |          |              |
|------------|--------------|----------|--------------|
| M735T608   | 735. 2027526 | 607. 625 | 6455317. 283 |
| M735T591_1 | 735. 1998594 | 590. 717 | 925005. 9171 |
| M735T744_1 | 735. 2104829 | 744. 192 | 457744. 5878 |
| M735T623   | 735. 2191584 | 623. 098 | 953695. 724  |
| M735T598_2 | 735. 2199503 | 598. 341 | 1426100. 121 |
| M735T609   | 735. 2198896 | 609. 19  | 6200535. 961 |
| M735T591_2 | 735. 2201403 | 590. 717 | 967556. 6814 |
| M735T744_2 | 735. 2293964 | 744. 192 | 540333. 1727 |
| M736T608   | 736. 2015615 | 607. 625 | 2229594. 595 |
| M736T251   | 736. 2032052 | 251. 004 | 139162. 9564 |
| M736T609   | 736. 2184833 | 609. 19  | 3228498. 93  |
| M736T595   | 736. 3332196 | 595. 35  | 180092. 8956 |
| M736T694_1 | 736. 3939241 | 694. 341 | 391511. 6934 |
| M736T694_2 | 736. 4104342 | 694. 341 | 374230. 8567 |
| M737T283_1 | 737. 2164123 | 282. 659 | 1593126. 527 |
| M737T294_1 | 737. 2177969 | 294. 152 | 8584422. 293 |
| M737T181_1 | 737. 2216872 | 180. 601 | 13859418. 58 |
| M737T212_1 | 737. 2232438 | 212. 366 | 10012563. 05 |
| M737T197_1 | 737. 2234639 | 197. 335 | 11761286. 25 |
| M737T746_1 | 737. 2236742 | 745. 747 | 672428. 6865 |
| M737T169_1 | 737. 2209831 | 168. 507 | 18147296. 24 |
| M737T125   | 737. 222758  | 125. 274 | 3912181. 83  |
| M737T108_1 | 737. 2227984 | 108. 082 | 17434268. 4  |
| M737T283_2 | 737. 2312319 | 282. 659 | 5564853. 997 |
| M737T294_2 | 737. 2303049 | 294. 152 | 31440157. 75 |
| M737T181_2 | 737. 2397523 | 180. 601 | 16343110     |
| M737T212_2 | 737. 2391558 | 212. 366 | 11322319. 27 |
| M737T197_2 | 737. 2389865 | 197. 335 | 15298545. 09 |
| M737T746_2 | 737. 2426703 | 745. 747 | 1275075. 991 |
| M737T169_2 | 737. 2399161 | 168. 507 | 28174236. 51 |
| M737T108_2 | 737. 2391091 | 108. 082 | 20967407. 22 |
| M737T147   | 737. 244633  | 147. 455 | 3030173. 21  |
| M737T283_3 | 737. 2431015 | 282. 659 | 3575480. 707 |
| M737T294_3 | 737. 2437784 | 294. 152 | 20272583. 63 |
| M737T181_3 | 737. 2531178 | 180. 601 | 7032645. 046 |
| M737T107   | 737. 2534774 | 106. 648 | 10864755. 56 |
| M737T197_3 | 737. 2532407 | 197. 335 | 6115834. 37  |
| M737T214   | 737. 2528876 | 213. 897 | 4321733. 96  |
| M737T169_3 | 737. 2534831 | 168. 507 | 10388116. 13 |
| M737T294_4 | 737. 260366  | 294. 152 | 1650010. 848 |
| M738T181_1 | 737. 7281363 | 180. 601 | 10257592. 59 |
| M738T212_1 | 737. 7274686 | 212. 366 | 8450137. 644 |
| M738T197_1 | 737. 7281808 | 197. 335 | 7840718. 88  |
| M738T283_1 | 737. 7269258 | 282. 659 | 2980146. 052 |
| M738T294_1 | 737. 7280387 | 294. 152 | 16596480. 46 |
| M738T169_1 | 737. 7269363 | 168. 507 | 11278345. 62 |
| M738T108_1 | 737. 7242221 | 108. 082 | 8637797. 655 |
| M738T181_2 | 737. 7422796 | 180. 601 | 9591758. 377 |
| M738T212_2 | 737. 7417108 | 212. 366 | 5986944. 347 |
| M738T197_2 | 737. 7423991 | 197. 335 | 8158452. 221 |
| M738T283_2 | 737. 7409586 | 282. 659 | 2788798. 943 |
| M738T294_2 | 737. 7424458 | 294. 152 | 15547716. 63 |
| M738T169_2 | 737. 7411822 | 168. 507 | 12476945. 87 |
| M738T108_2 | 737. 7431582 | 108. 082 | 10130061. 41 |

|            |              |          |              |
|------------|--------------|----------|--------------|
| M738T181_3 | 737. 756108  | 180. 601 | 2926115. 386 |
| M738T214   | 737. 7562588 | 213. 897 | 1046341. 311 |
| M738T294_3 | 737. 7558827 | 294. 152 | 2169805. 523 |
| M738T199   | 737. 755659  | 198. 821 | 1823767. 742 |
| M738T167_1 | 738. 231233  | 167. 01  | 7350709. 407 |
| M738T212_3 | 738. 2273422 | 212. 366 | 2934007. 155 |
| M738T107_1 | 738. 2264546 | 106. 648 | 4189019. 86  |
| M738T283_3 | 738. 2312308 | 282. 659 | 1378823. 134 |
| M738T294_4 | 738. 2321105 | 294. 152 | 9118771. 4   |
| M738T167_2 | 738. 2472493 | 167. 01  | 5401483. 001 |
| M738T212_4 | 738. 245966  | 212. 366 | 2429470. 593 |
| M738T107_2 | 738. 2454499 | 106. 648 | 3641120. 516 |
| M738T294_5 | 738. 2458992 | 294. 152 | 6344682. 294 |
| M738T554_1 | 738. 301596  | 554. 027 | 494111. 6829 |
| M738T554_2 | 738. 3169356 | 554. 027 | 585989. 3854 |
| M739T294_1 | 738. 7304383 | 294. 152 | 2649454. 648 |
| M739T169_1 | 738. 7371963 | 168. 507 | 2949056. 427 |
| M739T283   | 738. 7457356 | 282. 659 | 304016. 0653 |
| M739T294_2 | 738. 7448934 | 294. 152 | 2295101. 179 |
| M739T169_2 | 738. 7503522 | 168. 507 | 1181050. 274 |
| M739T556   | 738. 8031464 | 555. 524 | 411072. 1681 |
| M739T554   | 738. 8188585 | 554. 027 | 412478. 3993 |
| M739T473_1 | 739. 2018157 | 473. 329 | 304594. 3002 |
| M739T300   | 739. 2064697 | 300. 176 | 440895. 2489 |
| M739T473_2 | 739. 2160986 | 473. 329 | 216332. 4081 |
| M739T179   | 739. 2352198 | 179. 046 | 240544. 7829 |
| M739T294_3 | 739. 2328472 | 294. 152 | 525846. 8161 |
| M739T486   | 739. 370606  | 485. 784 | 473709. 3305 |
| M739T680_1 | 739. 4142471 | 679. 873 | 963035. 5578 |
| M739T680_2 | 739. 4304031 | 679. 873 | 1117624. 656 |
| M741T508_1 | 741. 4368336 | 507. 55  | 1605838. 457 |
| M741T508_2 | 741. 4496173 | 507. 55  | 1286753. 76  |
| M742T321   | 742. 2176151 | 321. 312 | 357840. 5915 |
| M743T740   | 743. 4497918 | 739. 509 | 1017210. 038 |
| M744T828   | 743. 6058375 | 827. 821 | 313957. 4912 |
| M744T834_1 | 743. 8943193 | 833. 866 | 710784. 6862 |
| M744T834_2 | 743. 9111374 | 833. 866 | 710309. 3339 |
| M744T634_1 | 744. 3644901 | 633. 832 | 782012. 9447 |
| M744T634_2 | 744. 3852441 | 633. 832 | 1579568. 726 |
| M745T181_1 | 744. 7438406 | 180. 601 | 1122761. 326 |
| M745T181_2 | 744. 7607038 | 180. 601 | 1822126. 91  |
| M745T834_1 | 744. 8867335 | 833. 866 | 1315603. 309 |
| M745T834_2 | 744. 9060069 | 833. 866 | 1133286. 647 |
| M745T531   | 745. 3208609 | 530. 804 | 728365. 2479 |
| M745T634   | 745. 3737382 | 633. 832 | 391405. 5231 |
| M745T625   | 745. 412198  | 624. 642 | 216156. 1221 |
| M746T600   | 746. 3441686 | 599. 904 | 1072073. 443 |
| M747T601   | 746. 8546905 | 601. 473 | 1246197. 685 |
| M749T149_1 | 749. 155433  | 148. 981 | 3223394. 993 |
| M749T158   | 749. 1751199 | 158. 1   | 731740. 1909 |
| M749T149_2 | 749. 1748387 | 148. 981 | 2681692. 307 |
| M749T69_1  | 749. 1904379 | 69. 1983 | 881709. 4517 |
| M749T69_2  | 749. 2049701 | 69. 1983 | 739668. 298  |
| M749T317   | 749. 2593816 | 316. 709 | 1121533. 78  |

|            |              |          |              |
|------------|--------------|----------|--------------|
| M749T327   | 749. 2725964 | 327. 449 | 516219. 2614 |
| M749T314   | 749. 2726859 | 313. 612 | 1073622. 54  |
| M750T68_1  | 749. 6915305 | 67. 6441 | 450306. 9483 |
| M750T68_2  | 749. 7060921 | 67. 6441 | 400894. 3394 |
| M750T68_3  | 750. 1924066 | 67. 6441 | 189352. 1486 |
| M750T68_4  | 750. 2078239 | 67. 6441 | 175527. 725  |
| M750T103   | 750. 253139  | 102. 948 | 2248349. 285 |
| M751T102   | 751. 2070496 | 101. 563 | 10509285. 02 |
| M751T93    | 751. 2069586 | 92. 9618 | 6628514. 112 |
| M751T187_1 | 751. 2213771 | 186. 689 | 809428. 8414 |
| M751T176_1 | 751. 2222972 | 176. 104 | 998951. 599  |
| M751T206   | 751. 2217603 | 206. 399 | 1981975. 866 |
| M751T217_1 | 751. 2221709 | 216. 95  | 3631519. 815 |
| M751T125   | 751. 2216412 | 125. 274 | 960708. 7584 |
| M751T294   | 751. 2267029 | 294. 152 | 4708704. 665 |
| M751T187_2 | 751. 2385152 | 186. 689 | 1031350. 236 |
| M751T205   | 751. 2385513 | 204. 895 | 2709950. 426 |
| M751T176_2 | 751. 2385452 | 176. 104 | 1074765. 209 |
| M751T217_2 | 751. 2388448 | 216. 95  | 4135564. 338 |
| M751T296   | 751. 2414781 | 295. 704 | 3077211. 037 |
| M751T766   | 751. 4489862 | 765. 588 | 1685284. 631 |
| M752T217_1 | 751. 7223823 | 216. 95  | 2357375. 367 |
| M752T294_1 | 751. 7299541 | 294. 152 | 3087710. 157 |
| M752T108   | 751. 7295949 | 108. 082 | 1422269. 706 |
| M752T215_1 | 751. 7397482 | 215. 4   | 3685523. 641 |
| M752T294_2 | 751. 7421438 | 294. 152 | 2440951. 788 |
| M752T614   | 751. 8400194 | 613. 824 | 106459. 0365 |
| M752T217_2 | 752. 2239007 | 216. 95  | 967081. 2822 |
| M752T215_2 | 752. 2434023 | 215. 4   | 1495706. 827 |
| M753T296   | 752. 7324514 | 295. 704 | 264889. 8709 |
| M753T537_1 | 753. 2180485 | 537. 051 | 304085. 2021 |
| M753T315   | 753. 2216149 | 315. 162 | 1295222. 79  |
| M753T537_2 | 753. 2325983 | 537. 051 | 188977. 474  |
| M753T317   | 753. 2359151 | 316. 709 | 1089975. 065 |
| M753T764   | 753. 4628012 | 764. 034 | 233053. 9483 |
| M755T525_1 | 754. 808465  | 524. 56  | 902342. 5379 |
| M755T525_2 | 754. 8279115 | 524. 56  | 1320778. 457 |
| M755T157   | 755. 2041828 | 156. 582 | 936102. 942  |
| M755T149_1 | 755. 2041537 | 148. 981 | 1370553. 817 |
| M755T181_1 | 755. 2121851 | 180. 601 | 1694355. 733 |
| M755T376_1 | 755. 2091014 | 376. 15  | 1367461. 012 |
| M755T358   | 755. 2097096 | 357. 746 | 638594. 0598 |
| M755T343_1 | 755. 2089101 | 342. 819 | 1663025. 411 |
| M755T283   | 755. 2136094 | 282. 659 | 826500. 725  |
| M755T294   | 755. 2161042 | 294. 152 | 2259124. 634 |
| M755T367_1 | 755. 2211861 | 367. 026 | 2122687. 834 |
| M755T212   | 755. 2278755 | 212. 366 | 1309871. 384 |
| M755T376_2 | 755. 2214056 | 376. 15  | 2366196. 06  |
| M755T343_2 | 755. 2212119 | 342. 819 | 2909456. 009 |
| M755T181_2 | 755. 2318458 | 180. 601 | 1351601. 273 |
| M755T149_2 | 755. 2347341 | 148. 981 | 2867203. 679 |
| M755T284   | 755. 2271371 | 283. 634 | 799043. 6835 |
| M755T367_2 | 755. 2365342 | 367. 026 | 817194. 9674 |
| M755T107   | 755. 2357334 | 106. 648 | 3323226. 022 |

|            |              |          |              |
|------------|--------------|----------|--------------|
| M755T376_3 | 755. 2352084 | 376. 15  | 1064660. 818 |
| M755T343_3 | 755. 2369439 | 342. 819 | 1349991. 577 |
| M755T525_3 | 755. 3202463 | 524. 56  | 300149. 8565 |
| M756T181_1 | 755. 714232  | 180. 601 | 1164564. 461 |
| M756T212_1 | 755. 7138297 | 212. 366 | 549948. 212  |
| M756T181_2 | 755. 7309429 | 180. 601 | 1003772. 801 |
| M756T212_2 | 755. 733528  | 212. 366 | 453748. 3525 |
| M756T284   | 756. 2104136 | 283. 634 | 366246. 875  |
| M756T181_3 | 756. 2113714 | 180. 601 | 825419. 8306 |
| M756T294   | 756. 2106131 | 294. 152 | 678767. 2527 |
| M756T181_4 | 756. 228872  | 180. 601 | 850283. 193  |
| M756T375   | 756. 2366555 | 374. 746 | 551132. 8102 |
| M756T367   | 756. 2367148 | 367. 026 | 315978. 4651 |
| M756T151   | 756. 241168  | 150. 528 | 1032522. 158 |
| M756T388_1 | 756. 3392105 | 388. 326 | 881296. 1675 |
| M756T388_2 | 756. 3589317 | 388. 326 | 1144299. 761 |
| M757T422   | 757. 2134884 | 422. 362 | 241190. 6977 |
| M757T388   | 757. 3604011 | 388. 326 | 462036. 5978 |
| M758T317   | 758. 2298601 | 316. 709 | 161620. 4531 |
| M760T181_1 | 760. 217029  | 180. 601 | 49511816. 52 |
| M760T232_1 | 760. 2194557 | 231. 973 | 3989439. 387 |
| M760T212_1 | 760. 2171886 | 212. 366 | 27048546. 88 |
| M760T268_1 | 760. 2191682 | 267. 702 | 849124. 5917 |
| M760T197_1 | 760. 2190191 | 197. 335 | 27754701. 8  |
| M760T283_1 | 760. 2190295 | 282. 659 | 15713903. 33 |
| M760T258_1 | 760. 2194951 | 258. 208 | 748423. 4164 |
| M760T294_1 | 760. 2166498 | 294. 152 | 49057947. 92 |
| M760T169_1 | 760. 2189737 | 168. 507 | 20679470. 45 |
| M760T108   | 760. 2166511 | 108. 082 | 36149525. 69 |
| M760T253   | 760. 2365024 | 252. 703 | 1948594. 324 |
| M760T258_2 | 760. 2364122 | 258. 208 | 1850414. 879 |
| M760T181_2 | 760. 2363698 | 180. 601 | 131283034. 3 |
| M760T232_2 | 760. 2363852 | 231. 973 | 10461484. 97 |
| M760T147   | 760. 2365728 | 147. 455 | 23574851. 29 |
| M760T212_2 | 760. 2363851 | 212. 366 | 71845363. 05 |
| M760T268_2 | 760. 2365552 | 267. 702 | 2158981. 487 |
| M760T107_1 | 760. 2362631 | 106. 648 | 91730089. 39 |
| M760T197_2 | 760. 2364149 | 197. 335 | 74423346. 88 |
| M760T283_2 | 760. 236421  | 282. 659 | 41108919. 41 |
| M760T130_1 | 760. 2362336 | 129. 827 | 30825658. 8  |
| M760T240   | 760. 2363981 | 239. 574 | 3105866. 799 |
| M760T294_2 | 760. 236347  | 294. 152 | 135553081. 4 |
| M760T169_2 | 760. 2363698 | 168. 507 | 55435786. 63 |
| M760T181_3 | 760. 2578516 | 180. 601 | 39633432. 39 |
| M760T212_3 | 760. 2577834 | 212. 366 | 20968972. 16 |
| M760T107_2 | 760. 258675  | 106. 648 | 28152758. 73 |
| M760T197_3 | 760. 2538113 | 197. 335 | 22464698. 54 |
| M760T283_3 | 760. 2538123 | 282. 659 | 12119433. 83 |
| M760T130_2 | 760. 2536034 | 129. 827 | 8981181. 268 |
| M760T294_3 | 760. 2584901 | 294. 152 | 42975627. 17 |
| M760T169_3 | 760. 2537667 | 168. 507 | 16755565. 59 |
| M761T181_1 | 760. 7199896 | 180. 601 | 32531617. 01 |
| M761T147   | 760. 7252614 | 147. 455 | 5215214. 878 |
| M761T212_1 | 760. 7193794 | 212. 366 | 18485770. 13 |

|            |              |           |              |
|------------|--------------|-----------|--------------|
| M761T197_1 | 760. 7201798 | 197. 335  | 18008700     |
| M761T283_1 | 760. 7198377 | 282. 659  | 10717068. 7  |
| M761T268_1 | 760. 7243546 | 268. 419  | 842118. 6007 |
| M761T131   | 760. 7196006 | 131. 207  | 3115149. 86  |
| M761T294_1 | 760. 7193495 | 294. 152  | 33840561. 06 |
| M761T259   | 760. 7249668 | 259. 134  | 452800. 0736 |
| M761T169_1 | 760. 7212144 | 168. 507  | 14376784. 52 |
| M761T238   | 760. 719659  | 238. 024  | 3915694. 122 |
| M761T108_1 | 760. 7187233 | 108. 082  | 22052007. 04 |
| M761T254   | 760. 7257109 | 253. 674  | 530351. 9225 |
| M761T266   | 760. 7436386 | 266. 4265 | 2362202. 561 |
| M761T251_1 | 760. 7431416 | 251. 004  | 691045. 0133 |
| M761T257   | 760. 7437255 | 257. 001  | 991702. 8309 |
| M761T181_2 | 760. 7435407 | 180. 601  | 67999756. 52 |
| M761T212_2 | 760. 7435799 | 212. 366  | 36222100. 13 |
| M761T107   | 760. 7433249 | 106. 648  | 47791679. 73 |
| M761T197_2 | 760. 7435947 | 197. 335  | 40393794. 37 |
| M761T283_2 | 760. 7435345 | 282. 659  | 21612980. 14 |
| M761T237_1 | 760. 7435735 | 236. 518  | 8055340. 193 |
| M761T294_2 | 760. 7435538 | 294. 152  | 73695189. 54 |
| M761T169_2 | 760. 7436026 | 168. 507  | 30174648. 46 |
| M761T146   | 760. 7424229 | 146. 08   | 3437418. 611 |
| M761T127   | 760. 7524701 | 126. 755  | 7432162. 975 |
| M761T264   | 760. 7584369 | 263. 845  | 263804. 1348 |
| M761T268_2 | 760. 7582153 | 268. 419  | 250330. 7799 |
| M761T245   | 760. 7585738 | 245. 353  | 145960. 4683 |
| M761T258   | 760. 7580499 | 258. 208  | 242983. 3564 |
| M761T251_2 | 760. 756387  | 251. 004  | 348569. 9178 |
| M761T181_3 | 760. 7583294 | 180. 601  | 22106641. 01 |
| M761T212_3 | 760. 7559963 | 212. 366  | 11706907. 29 |
| M761T197_3 | 760. 7585185 | 197. 335  | 13139317. 17 |
| M761T283_3 | 760. 7584577 | 282. 659  | 6900241. 722 |
| M761T237_2 | 760. 7578879 | 236. 518  | 2411260. 308 |
| M761T294_3 | 760. 7584786 | 294. 152  | 24586990. 03 |
| M761T169_3 | 760. 7560409 | 168. 507  | 10591670. 13 |
| M761T108_2 | 760. 7560373 | 108. 082  | 27685379. 75 |
| M761T166   | 761. 1914784 | 165. 522  | 392909. 1534 |
| M761T181_4 | 761. 2237837 | 180. 601  | 18602227. 36 |
| M761T212_4 | 761. 2238298 | 212. 366  | 10505909. 69 |
| M761T197_4 | 761. 2237789 | 197. 335  | 9867862. 755 |
| M761T169_4 | 761. 223962  | 168. 507  | 8446580. 895 |
| M761T108_3 | 761. 2269606 | 108. 082  | 14836128. 84 |
| M761T283_4 | 761. 2288521 | 282. 659  | 9896387. 13  |
| M761T294_4 | 761. 2288216 | 294. 152  | 31713303. 96 |
| M761T181_5 | 761. 2362272 | 180. 601  | 37399228. 72 |
| M761T212_5 | 761. 2362806 | 212. 366  | 21062964. 03 |
| M761T197_5 | 761. 2362278 | 197. 335  | 20127466. 18 |
| M761T169_5 | 761. 2364115 | 168. 507  | 16222478. 5  |
| M761T283_5 | 761. 2487675 | 282. 659  | 9374824. 017 |
| M761T294_5 | 761. 2487404 | 294. 152  | 31256918. 49 |
| M761T108_4 | 761. 2459841 | 108. 082  | 18863228. 53 |
| M761T181_6 | 761. 2486723 | 180. 601  | 30319870. 93 |
| M761T212_6 | 761. 2487323 | 212. 366  | 15644851. 25 |
| M761T197_6 | 761. 2486775 | 197. 335  | 16180602. 53 |

|            |              |          |              |
|------------|--------------|----------|--------------|
| M761T169_6 | 761. 2488648 | 168. 507 | 12803669. 96 |
| M762T294_1 | 761. 7220176 | 294. 152 | 4047248. 845 |
| M762T130   | 761. 7295503 | 129. 827 | 884759. 2443 |
| M762T108   | 761. 7294174 | 108. 082 | 6330329. 449 |
| M762T181_1 | 761. 7317754 | 180. 601 | 12435608. 58 |
| M762T212_1 | 761. 7319915 | 212. 366 | 10838340. 55 |
| M762T283_1 | 761. 7337099 | 282. 659 | 3499786. 26  |
| M762T268_1 | 761. 7321328 | 268. 419 | 212888. 7738 |
| M762T294_2 | 761. 7344744 | 294. 152 | 11930082. 33 |
| M762T169_1 | 761. 7323227 | 168. 507 | 5042507. 226 |
| M762T181_2 | 761. 7467225 | 180. 601 | 12808129. 85 |
| M762T212_2 | 761. 7469284 | 212. 366 | 11449971. 28 |
| M762T107   | 761. 7493733 | 106. 648 | 6788848. 011 |
| M762T268_2 | 761. 7470902 | 268. 419 | 223129. 3171 |
| M762T134   | 761. 7494824 | 134. 253 | 417157. 5931 |
| M762T294_3 | 761. 7469314 | 294. 152 | 12683383. 08 |
| M762T169_2 | 761. 7472656 | 168. 507 | 5203458. 098 |
| M762T284   | 761. 7468742 | 283. 634 | 3661721. 524 |
| M762T283_2 | 762. 230886  | 282. 659 | 953743. 4552 |
| M762T294_4 | 762. 2310934 | 294. 152 | 3336906. 298 |
| M762T181_3 | 762. 2380735 | 180. 601 | 3401805. 886 |
| M762T212_3 | 762. 2331705 | 212. 366 | 1944215. 871 |
| M762T197_1 | 762. 2336302 | 197. 335 | 1187567. 519 |
| M762T212_4 | 762. 2481244 | 212. 366 | 1785172. 816 |
| M762T197_2 | 762. 2485988 | 197. 335 | 1522881. 17  |
| M762T283_3 | 762. 2483231 | 282. 659 | 964058. 3595 |
| M762T294_5 | 762. 2482889 | 294. 152 | 3500653. 569 |
| M762T181_4 | 762. 2567424 | 180. 601 | 1148428. 971 |
| M762T147   | 762. 2581822 | 147. 455 | 1333332. 788 |
| M762T517   | 762. 4291843 | 516. 908 | 265215. 5861 |
| M763T181   | 762. 7518335 | 180. 601 | 456797. 5663 |
| M763T157   | 763. 1715404 | 156. 582 | 1485224. 157 |
| M763T149_1 | 763. 1766888 | 148. 981 | 3521105. 277 |
| M763T149_2 | 763. 1926786 | 148. 981 | 2783755. 95  |
| M764T178_1 | 764. 2654562 | 177. 649 | 1450345. 871 |
| M764T178_2 | 764. 2780117 | 177. 649 | 3241989. 08  |
| M764T178_3 | 764. 2930024 | 177. 649 | 1361486. 79  |
| M765T603_1 | 765. 2062286 | 603. 04  | 647544. 0882 |
| M765T603_2 | 765. 2262856 | 603. 04  | 2069295. 958 |
| M765T495_1 | 765. 2764401 | 495. 125 | 1583962. 823 |
| M765T495_2 | 765. 2970309 | 495. 125 | 316479. 3448 |
| M765T694_1 | 765. 3365915 | 694. 341 | 376253. 1378 |
| M765T694_2 | 765. 3516515 | 694. 341 | 263847. 2777 |
| M767T694_1 | 767. 3891736 | 694. 341 | 194124. 7497 |
| M767T694_2 | 767. 4038704 | 694. 341 | 141352. 0555 |
| M769T181   | 768. 721263  | 180. 601 | 428353. 2854 |
| M769T413_1 | 769. 3019556 | 413. 006 | 228614. 6528 |
| M769T413_2 | 769. 3189254 | 413. 006 | 207537. 5794 |
| M769T802_1 | 769. 3940129 | 802. 116 | 620170. 7217 |
| M769T802_2 | 769. 4091947 | 802. 116 | 444076. 5194 |
| M771T608_1 | 771. 1837994 | 607. 625 | 491457. 2487 |
| M771T608_2 | 771. 1990367 | 607. 625 | 311885. 2164 |
| M771T181_1 | 771. 2175131 | 180. 601 | 1662389. 564 |
| M771T283   | 771. 2179882 | 282. 659 | 546793. 4676 |

|            |              |          |              |
|------------|--------------|----------|--------------|
| M771T181_2 | 771. 2315584 | 180. 601 | 1770043. 002 |
| M771T529   | 771. 4043397 | 529. 248 | 218753. 3376 |
| M771T528   | 771. 4220844 | 527. 688 | 207976. 297  |
| M771T669   | 771. 4865386 | 669. 12  | 1613867. 261 |
| M772T329_1 | 772. 23978   | 328. 999 | 1050920. 56  |
| M772T329_2 | 772. 2565062 | 328. 999 | 1110094. 626 |
| M773T181_1 | 772. 7191178 | 180. 601 | 187324. 1381 |
| M773T181_2 | 772. 7323013 | 180. 601 | 197851. 7805 |
| M773T528_1 | 773. 3217166 | 527. 688 | 1485451. 835 |
| M773T528_2 | 773. 3398982 | 527. 688 | 1723764. 144 |
| M773T776   | 773. 3809509 | 776. 391 | 1117411. 753 |
| M774T528   | 773. 8246729 | 527. 688 | 1247311. 24  |
| M774T529_1 | 773. 8449628 | 529. 248 | 935921. 5248 |
| M774T217_1 | 774. 222119  | 216. 95  | 2705340. 644 |
| M774T296_1 | 774. 2195222 | 295. 704 | 2407310. 167 |
| M774T217_2 | 774. 2346767 | 216. 95  | 3864894. 751 |
| M774T296_2 | 774. 2404847 | 295. 704 | 3656257. 911 |
| M774T529_2 | 774. 3245133 | 529. 248 | 840396. 3191 |
| M774T776_1 | 774. 3874632 | 776. 391 | 408310. 4348 |
| M774T548   | 774. 3879177 | 547. 805 | 1759251. 901 |
| M774T776_2 | 774. 3976903 | 776. 391 | 318210. 8803 |
| M775T217_1 | 774. 7213342 | 216. 95  | 1544709. 576 |
| M775T296_1 | 774. 7296123 | 295. 704 | 1748997. 158 |
| M775T217_2 | 774. 7347431 | 216. 95  | 2368179. 829 |
| M775T217_3 | 774. 7493981 | 216. 95  | 711924. 4616 |
| M775T296_2 | 774. 7418259 | 295. 704 | 1953324. 332 |
| M775T823_1 | 774. 9197446 | 823. 375 | 554770. 7028 |
| M775T823_2 | 774. 9401909 | 823. 375 | 412601. 858  |
| M775T78    | 775. 1340157 | 78. 2661 | 5680130. 328 |
| M775T79    | 775. 1502418 | 79. 4105 | 7850184. 286 |
| M775T217_4 | 775. 2232292 | 216. 95  | 452147. 2627 |
| M775T217_5 | 775. 2414849 | 216. 95  | 958533. 1595 |
| M775T548_1 | 775. 3714258 | 547. 805 | 392532. 5481 |
| M775T548_2 | 775. 390811  | 547. 805 | 668119. 5157 |
| M776T79_1  | 776. 139507  | 79. 4105 | 944186. 8333 |
| M776T79_2  | 776. 1533144 | 79. 4105 | 1224072. 01  |
| M777T442   | 777. 4432606 | 442. 399 | 103895. 6909 |
| M778T197   | 778. 2133404 | 197. 335 | 419985. 3652 |
| M778T181   | 778. 2294017 | 180. 601 | 1694134. 052 |
| M778T300_1 | 778. 2905003 | 300. 176 | 4815700. 282 |
| M778T300_2 | 778. 3085151 | 300. 176 | 3428732. 664 |
| M779T181_1 | 778. 7175173 | 180. 601 | 777113. 6288 |
| M779T181_2 | 778. 734958  | 180. 601 | 808704. 7761 |
| M779T151_1 | 779. 1966745 | 150. 528 | 6206320. 88  |
| M779T283_1 | 779. 2048421 | 282. 659 | 1096978. 274 |
| M779T294_1 | 779. 2045249 | 294. 152 | 1662683. 366 |
| M779T212_1 | 779. 2122776 | 212. 366 | 1514802. 264 |
| M779T283_2 | 779. 2180993 | 282. 659 | 778949. 3591 |
| M779T294_2 | 779. 2175301 | 294. 152 | 1434754. 692 |
| M779T151_2 | 779. 2134665 | 150. 528 | 5995549. 378 |
| M779T181_3 | 779. 2275622 | 180. 601 | 521931. 0063 |
| M779T212_2 | 779. 2279646 | 212. 366 | 438490. 7428 |
| M779T300   | 779. 2958378 | 300. 176 | 1665444. 372 |
| M780T181_1 | 779. 7084259 | 180. 601 | 1679479. 854 |

|            |              |          |              |
|------------|--------------|----------|--------------|
| M780T181_2 | 779. 7300668 | 180. 601 | 311745. 0486 |
| M780T151   | 780. 203522  | 150. 528 | 2357679. 714 |
| M780T155   | 780. 2184162 | 155. 033 | 1243633. 104 |
| M780T300   | 780. 2920821 | 300. 176 | 366980. 8108 |
| M780T730_1 | 780. 3436281 | 730. 264 | 926349. 1263 |
| M780T730_2 | 780. 3643089 | 730. 264 | 2221105. 574 |
| M780T730_3 | 780. 3795525 | 730. 264 | 296925. 8081 |
| M780T517   | 780. 3876913 | 516. 908 | 125928. 3508 |
| M780T518   | 780. 400919  | 518. 474 | 161020. 4917 |
| M781T315   | 781. 231601  | 315. 162 | 450440. 2649 |
| M781T314   | 781. 2490736 | 313. 612 | 516980. 074  |
| M781T106_1 | 781. 2686785 | 105. 537 | 4070323. 183 |
| M781T106_2 | 781. 2850843 | 105. 537 | 5341745. 5   |
| M781T730_1 | 781. 3474059 | 730. 264 | 447985. 6076 |
| M781T730_2 | 781. 3681099 | 730. 264 | 1019112. 018 |
| M782T182_1 | 782. 2435369 | 182. 156 | 824445. 781  |
| M782T182_2 | 782. 2589679 | 182. 156 | 568204. 8909 |
| M782T107   | 782. 275221  | 106. 648 | 2043084. 119 |
| M782T551_1 | 782. 3583784 | 550. 932 | 1574288. 014 |
| M782T551_2 | 782. 3739411 | 550. 932 | 1079471. 76  |
| M783T296   | 782. 7539122 | 295. 704 | 238356. 5259 |
| M783T551   | 782. 8785677 | 550. 932 | 553651. 4275 |
| M783T181_1 | 783. 2232631 | 180. 601 | 25081726. 94 |
| M783T167_1 | 783. 2234472 | 167. 01  | 5106745. 661 |
| M783T212_1 | 783. 2228971 | 212. 366 | 16823150. 69 |
| M783T107_1 | 783. 2228806 | 106. 648 | 13998900. 06 |
| M783T197_1 | 783. 2229368 | 197. 335 | 11931144. 37 |
| M783T130_1 | 783. 2232597 | 129. 827 | 2488306. 269 |
| M783T294_1 | 783. 2191138 | 294. 152 | 7328284. 03  |
| M783T284   | 783. 2190584 | 283. 634 | 3012805. 703 |
| M783T283_1 | 783. 2306452 | 282. 659 | 11658989. 67 |
| M783T294_2 | 783. 2305361 | 294. 152 | 25765477. 08 |
| M783T181_2 | 783. 2410135 | 180. 601 | 50244004. 14 |
| M783T167_2 | 783. 2409879 | 167. 01  | 10016754. 46 |
| M783T212_2 | 783. 2410823 | 212. 366 | 34100525. 97 |
| M783T107_2 | 783. 2410678 | 106. 648 | 29084635. 02 |
| M783T197_2 | 783. 2411268 | 197. 335 | 24096304. 42 |
| M783T283_2 | 783. 2462315 | 282. 659 | 10912138. 69 |
| M783T130_2 | 783. 240979  | 129. 827 | 7812327. 783 |
| M783T294_3 | 783. 2461267 | 294. 152 | 25634271. 53 |
| M783T181_3 | 783. 2540024 | 180. 601 | 23744923. 15 |
| M783T167_3 | 783. 2534275 | 167. 01  | 4771100. 19  |
| M783T212_3 | 783. 2549041 | 212. 366 | 16208817. 41 |
| M783T197_3 | 783. 2541201 | 197. 335 | 11486568. 5  |
| M783T778   | 783. 4384686 | 777. 92  | 333300. 8851 |
| M784T294_1 | 783. 7193397 | 294. 152 | 2890732. 308 |
| M784T181_1 | 783. 7273337 | 180. 601 | 21329001. 46 |
| M784T212_1 | 783. 7273006 | 212. 366 | 14610731. 96 |
| M784T107_1 | 783. 7275186 | 106. 648 | 12844096. 24 |
| M784T197_1 | 783. 7272009 | 197. 335 | 9829899. 071 |
| M784T167_1 | 783. 730142  | 167. 01  | 4462167. 447 |
| M784T283_1 | 783. 7293653 | 282. 659 | 5933126. 736 |
| M784T294_2 | 783. 7297436 | 294. 152 | 12923407. 46 |
| M784T167_2 | 783. 7504606 | 167. 01  | 3895283. 479 |



|            |              |          |              |
|------------|--------------|----------|--------------|
| M784T107_2 | 783. 745258  | 106. 648 | 18085238. 57 |
| M784T271   | 783. 7497683 | 270. 519 | 419303. 364  |
| M784T266   | 783. 7507177 | 265. 541 | 140493. 3541 |
| M784T181_2 | 783. 750736  | 180. 601 | 19772284. 73 |
| M784T212_2 | 783. 750701  | 212. 366 | 13445697. 82 |
| M784T197_2 | 783. 7506093 | 197. 335 | 9248912. 812 |
| M784T283_2 | 783. 7507493 | 282. 659 | 5502019. 317 |
| M784T294_3 | 783. 7505524 | 294. 152 | 12742972. 87 |
| M784T294_4 | 783. 7633165 | 294. 152 | 2812137. 194 |
| M784T211   | 783. 7636276 | 210. 883 | 5108742. 446 |
| M784T284_1 | 783. 763651  | 283. 634 | 1155832. 649 |
| M784T181_3 | 784. 2222233 | 180. 601 | 4662722. 671 |
| M784T212_3 | 784. 2230018 | 212. 366 | 2963802. 751 |
| M784T283_3 | 784. 2269125 | 282. 659 | 2403258. 717 |
| M784T131   | 784. 2302442 | 131. 207 | 1604680. 415 |
| M784T294_5 | 784. 226895  | 294. 152 | 5086160. 679 |
| M784T181_4 | 784. 2347057 | 180. 601 | 13991842. 93 |
| M784T167_3 | 784. 2345418 | 167. 01  | 2430815. 922 |
| M784T212_4 | 784. 2347087 | 212. 366 | 9100950. 599 |
| M784T107_3 | 784. 2307858 | 106. 648 | 6631551. 651 |
| M784T197_3 | 784. 2345452 | 197. 335 | 6218023. 026 |
| M784T283_4 | 784. 2399283 | 282. 659 | 4282077. 37  |
| M784T294_6 | 784. 2399153 | 294. 152 | 9382754. 592 |
| M784T181_5 | 784. 2477216 | 180. 601 | 16035703. 09 |
| M784T167_4 | 784. 2475506 | 167. 01  | 2818854. 969 |
| M784T212_5 | 784. 2477238 | 212. 366 | 10512318. 15 |
| M784T107_4 | 784. 2488076 | 106. 648 | 8243274. 365 |
| M784T197_4 | 784. 2475643 | 197. 335 | 7251086. 881 |
| M784T133   | 784. 2477127 | 132. 707 | 2342630. 445 |
| M784T294_7 | 784. 2581377 | 294. 152 | 3897187. 381 |
| M784T284_2 | 784. 2554609 | 283. 634 | 1688011. 69  |
| M784T181_6 | 784. 2597183 | 180. 601 | 6362485. 114 |
| M784T212_6 | 784. 2591871 | 212. 366 | 4222019. 487 |
| M784T588   | 784. 3650236 | 587. 595 | 181194. 8958 |
| M784T586   | 784. 3806497 | 586. 044 | 197918. 0807 |
| M784T792_1 | 784. 4779346 | 791. 678 | 751922. 1825 |
| M784T792_2 | 784. 4984619 | 791. 678 | 718087. 4982 |
| M785T294_1 | 784. 7297791 | 294. 152 | 1452249. 982 |
| M785T181_1 | 784. 7396739 | 180. 601 | 4710375. 075 |
| M785T212_1 | 784. 7349659 | 212. 366 | 2855707. 93  |
| M785T107_1 | 784. 7348456 | 106. 648 | 1755819. 198 |
| M785T197_1 | 784. 7348523 | 197. 335 | 1751178. 811 |
| M785T284_1 | 784. 7401467 | 283. 634 | 1491022. 262 |
| M785T294_2 | 784. 740201  | 294. 152 | 3058603. 163 |
| M785T212_2 | 784. 7500774 | 212. 366 | 2915797. 618 |
| M785T107_2 | 784. 7504828 | 106. 648 | 1738054. 668 |
| M785T197_2 | 784. 7504826 | 197. 335 | 1758855. 697 |
| M785T294_3 | 784. 7506243 | 294. 152 | 2497291. 382 |
| M785T284_2 | 784. 7557708 | 283. 634 | 715666. 9162 |
| M785T181_2 | 785. 2405668 | 180. 601 | 1465908. 153 |
| M785T441   | 785. 2380789 | 440. 833 | 459640. 1548 |
| M785T428_1 | 785. 2367486 | 428. 448 | 666239. 3471 |
| M785T181_3 | 785. 2562202 | 180. 601 | 772913. 9577 |
| M785T294_4 | 785. 2556784 | 294. 152 | 407517. 1351 |

|            |              |          |              |
|------------|--------------|----------|--------------|
| M785T428_2 | 785. 256655  | 428. 448 | 818436. 9452 |
| M786T683   | 785. 5105132 | 682. 948 | 91135. 40235 |
| M786T181_1 | 786. 203882  | 180. 601 | 811707. 3689 |
| M786T181_2 | 786. 227434  | 180. 601 | 799567. 0534 |
| M786T214   | 786. 2280544 | 213. 897 | 424575. 1049 |
| M787T294   | 786. 729604  | 294. 152 | 578486. 5706 |
| M787T733_1 | 787. 3402112 | 733. 352 | 679942. 9426 |
| M787T733_2 | 787. 362934  | 733. 352 | 1116101. 638 |
| M788T532   | 788. 3560538 | 532. 372 | 96532. 50827 |
| M788T356_1 | 788. 4252858 | 356. 274 | 184978. 8557 |
| M788T356_2 | 788. 4386353 | 356. 274 | 115709. 6344 |
| M789T736   | 789. 3740629 | 736. 458 | 296494. 7703 |
| M791T535_1 | 790. 8587353 | 535. 488 | 291485. 2399 |
| M791T535_2 | 790. 8748849 | 535. 488 | 122624. 7428 |
| M791T793_1 | 791. 162468  | 793. 233 | 452489. 4502 |
| M791T793_2 | 791. 1800525 | 793. 233 | 628769. 6747 |
| M791T484   | 791. 3856399 | 484. 221 | 84568. 50019 |
| M791T475_1 | 791. 4285192 | 474. 888 | 723868. 3476 |
| M791T475_2 | 791. 4496399 | 474. 888 | 995770. 5557 |
| M792T615   | 792. 4341118 | 615. 38  | 175930. 2512 |
| M793T33    | 792. 9056127 | 32. 8715 | 295810. 2235 |
| M793T305   | 793. 2663168 | 304. 743 | 161970. 7088 |
| M794T181_1 | 794. 2182621 | 180. 601 | 985862. 9409 |
| M794T181_2 | 794. 2394186 | 180. 601 | 1082721. 107 |
| M794T212   | 794. 2450893 | 212. 366 | 211593. 0048 |
| M794T622_1 | 794. 4253127 | 621. 547 | 488310. 7453 |
| M794T622_2 | 794. 4465578 | 621. 547 | 837760. 3973 |
| M795T181   | 794. 7389797 | 180. 601 | 791119. 8265 |
| M795T149_1 | 795. 1559971 | 148. 981 | 5256678. 42  |
| M795T158   | 795. 1791716 | 158. 1   | 2173586. 106 |
| M795T149_2 | 795. 1789555 | 148. 981 | 7047862. 604 |
| M795T427_1 | 795. 2934336 | 426. 913 | 401876. 6459 |
| M795T427_2 | 795. 3288948 | 426. 913 | 438558. 127  |
| M796T826   | 795. 5526109 | 826. 333 | 1050098. 026 |
| M796T829   | 795. 5676469 | 829. 321 | 1923049. 002 |
| M796T512_1 | 795. 8767496 | 512. 228 | 270142. 5485 |
| M796T512_2 | 795. 8925529 | 512. 228 | 269675. 1948 |
| M796T149_1 | 796. 1686481 | 148. 981 | 2631491. 739 |
| M796T149_2 | 796. 1841002 | 148. 981 | 1944092. 184 |
| M796T528_1 | 796. 3134158 | 527. 688 | 3328163. 745 |
| M796T528_2 | 796. 3293952 | 527. 688 | 19939619. 66 |
| M796T528_3 | 796. 3453772 | 527. 688 | 13153934. 55 |
| M797T528_1 | 796. 8197593 | 527. 688 | 5843251. 375 |
| M797T528_2 | 796. 8304213 | 527. 688 | 15674957. 61 |
| M797T528_3 | 796. 8410849 | 527. 688 | 15707597. 23 |
| M797T528_4 | 796. 8570763 | 527. 688 | 2428268. 986 |
| M797T528_5 | 797. 3373782 | 527. 688 | 8441143. 338 |
| M797T597   | 797. 3530264 | 596. 795 | 857884. 2709 |
| M798T529   | 797. 8196909 | 529. 248 | 637045. 1603 |
| M798T597_1 | 797. 8490142 | 596. 795 | 474531. 0811 |
| M798T597_2 | 797. 8703639 | 596. 795 | 621757. 4887 |
| M798T609_1 | 798. 1922214 | 609. 19  | 842544. 3567 |
| M798T609_2 | 798. 2136232 | 609. 19  | 1821219. 11  |
| M798T598_1 | 798. 3579095 | 598. 341 | 287229. 1066 |

|            |              |          |              |
|------------|--------------|----------|--------------|
| M798T598_2 | 798. 3686067 | 598. 341 | 261028. 1675 |
| M798T498   | 798. 3851463 | 498. 202 | 144438. 2931 |
| M798T694_1 | 798. 3886914 | 694. 341 | 598000. 5529 |
| M798T694_2 | 798. 4086422 | 694. 341 | 300469. 0334 |
| M799T608   | 799. 1986789 | 607. 625 | 565805. 6758 |
| M799T563   | 799. 4642138 | 562. 946 | 3550110. 755 |
| M800T563   | 799. 5033847 | 562. 946 | 1778808. 261 |
| M800T776   | 800. 3851994 | 776. 391 | 355961. 4623 |
| M800T813   | 800. 485689  | 812. 68  | 198256. 9629 |
| M801T563_1 | 801. 4829463 | 562. 946 | 1201288. 006 |
| M801T563_2 | 801. 4965082 | 562. 946 | 1040968. 672 |
| M802T179   | 802. 2119761 | 179. 046 | 1196204. 725 |
| M802T506   | 802. 4148913 | 505. 99  | 159402. 9593 |
| M803T367   | 803. 2140235 | 367. 026 | 666380. 6071 |
| M803T365   | 803. 2329218 | 365. 475 | 526196. 9259 |
| M803T611   | 803. 4366239 | 610. 742 | 213208. 584  |
| M804T182_1 | 803. 7756011 | 182. 156 | 718261. 9397 |
| M804T182_2 | 803. 7914339 | 182. 156 | 532368. 6324 |
| M805T498_1 | 805. 4436167 | 498. 202 | 250085. 783  |
| M805T498_2 | 805. 465291  | 498. 202 | 318411. 4541 |
| M805T669   | 805. 4766754 | 669. 12  | 309277. 7433 |
| M808T669_1 | 808. 4355199 | 669. 12  | 704836. 2699 |
| M808T669_2 | 808. 4552044 | 669. 12  | 1522666. 159 |
| M809T166   | 809. 2459956 | 165. 522 | 1421835. 752 |
| M809T182   | 809. 2454004 | 182. 156 | 2693714. 043 |
| M809T208_1 | 809. 2456369 | 207. 935 | 1936450. 794 |
| M809T155_1 | 809. 246004  | 155. 033 | 1400992. 541 |
| M809T194_1 | 809. 2450756 | 194. 243 | 4263228. 338 |
| M809T146_1 | 809. 2457669 | 146. 08  | 875490. 893  |
| M809T108_1 | 809. 2446373 | 108. 082 | 3100310. 103 |
| M809T296_1 | 809. 2451239 | 295. 704 | 4283848. 299 |
| M809T208_2 | 809. 2614786 | 207. 935 | 2011763. 518 |
| M809T184   | 809. 2618104 | 183. 708 | 2506937. 246 |
| M809T155_2 | 809. 262315  | 155. 033 | 1376928. 99  |
| M809T194_2 | 809. 2614397 | 194. 243 | 3973196. 513 |
| M809T146_2 | 809. 2621379 | 146. 08  | 834881. 9261 |
| M809T220   | 809. 2619164 | 219. 979 | 828682. 1247 |
| M809T296_2 | 809. 2618278 | 295. 704 | 4379510. 758 |
| M809T108_2 | 809. 2665442 | 108. 082 | 2081153. 89  |
| M809T467   | 809. 3713518 | 467. 127 | 141679. 6955 |
| M809T469   | 809. 387955  | 468. 69  | 99564. 58243 |
| M809T832_1 | 809. 4589145 | 832. 338 | 286633. 5841 |
| M809T832_2 | 809. 4752821 | 832. 338 | 250710. 9342 |
| M810T209_1 | 810. 2446228 | 209. 472 | 619387. 1336 |
| M810T297_1 | 810. 2452831 | 297. 149 | 1011907. 564 |
| M810T184_1 | 810. 2505401 | 183. 708 | 894823. 5597 |
| M810T208   | 810. 2568645 | 207. 935 | 916719. 9406 |
| M810T297_2 | 810. 2612562 | 297. 149 | 1737355. 525 |
| M810T194   | 810. 2562108 | 194. 243 | 1602851. 767 |
| M810T108   | 810. 2618299 | 108. 082 | 770754. 8065 |
| M810T184_2 | 810. 2689112 | 183. 708 | 793628. 6084 |
| M810T209_2 | 810. 269155  | 209. 472 | 589328. 7907 |
| M810T196   | 810. 2711026 | 195. 791 | 638899. 2007 |
| M811T564   | 810. 9354963 | 564. 487 | 3116137. 834 |

|            |              |           |              |
|------------|--------------|-----------|--------------|
| M811T594   | 811. 4649874 | 593. 841  | 1729437. 294 |
| M812T594   | 811. 5099578 | 593. 841  | 146898. 435  |
| M812T337   | 812. 2966437 | 336. 681  | 365407. 7314 |
| M813T594   | 812. 5098861 | 593. 841  | 69972. 8163  |
| M813T337   | 813. 26942   | 336. 681  | 159284. 147  |
| M814T801_1 | 813. 503921  | 800. 683  | 2639517. 717 |
| M814T801_2 | 813. 5149252 | 800. 683  | 882580. 1228 |
| M814T422_1 | 813. 8949038 | 422. 362  | 441110. 4684 |
| M814T422_2 | 813. 9058918 | 422. 362  | 767282. 5071 |
| M814T422_3 | 813. 9168936 | 422. 362  | 510788. 477  |
| M814T422_4 | 814. 396642  | 422. 362  | 352807. 5527 |
| M814T422_5 | 814. 4177152 | 422. 362  | 330526. 2284 |
| M815T716_1 | 815. 389428  | 716. 391  | 449068. 0466 |
| M815T716_2 | 815. 4111209 | 716. 391  | 884098. 211  |
| M815T531   | 815. 4325411 | 530. 804  | 424437. 5875 |
| M815T669_1 | 815. 4469926 | 669. 12   | 13037512. 37 |
| M815T606_1 | 815. 4496043 | 606. 096  | 1616746. 132 |
| M815T669_2 | 815. 4664106 | 669. 12   | 165315559    |
| M815T594_1 | 815. 4662436 | 593. 841  | 7785954. 492 |
| M815T606_2 | 815. 4661556 | 606. 096  | 23003146. 81 |
| M815T691   | 815. 4662309 | 691. 303  | 4699580. 445 |
| M815T669_3 | 815. 4884922 | 669. 12   | 153589974    |
| M815T594_2 | 815. 4883293 | 593. 841  | 7272232. 151 |
| M815T606_3 | 815. 4882365 | 606. 096  | 22219928. 84 |
| M816T669_1 | 815. 502291  | 669. 12   | 32969608. 3  |
| M815T606_4 | 815. 4992742 | 606. 096  | 4779774. 26  |
| M816T669_2 | 816. 4569372 | 669. 12   | 13713905. 35 |
| M817T614_1 | 817. 2137468 | 613. 824  | 321318. 7753 |
| M817T614_2 | 817. 2303858 | 613. 824  | 146297. 2642 |
| M817T484   | 817. 4296679 | 484. 221  | 1558101. 544 |
| M817T671   | 817. 4594842 | 670. 674  | 3736884. 162 |
| M817T606   | 817. 4686135 | 606. 096  | 1971575. 565 |
| M818T270   | 818. 2455912 | 270. 0075 | 455229. 8823 |
| M818T263   | 818. 2462046 | 263. 129  | 678842. 9532 |
| M818T249_1 | 818. 2442793 | 248. 622  | 890622. 2816 |
| M818T257   | 818. 2456693 | 257. 001  | 542706. 8317 |
| M818T242   | 818. 2453234 | 242. 223  | 1127294. 865 |
| M818T121   | 818. 2452372 | 120. 945  | 2846600. 625 |
| M818T208_1 | 818. 2458365 | 207. 935  | 8588553. 138 |
| M818T278   | 818. 2441211 | 278. 267  | 1979682. 835 |
| M818T232   | 818. 2460065 | 231. 973  | 3953601. 963 |
| M818T184_1 | 818. 2462563 | 183. 708  | 11363270. 08 |
| M818T107_1 | 818. 2456998 | 106. 648  | 16355047. 95 |
| M818T197_1 | 818. 24477   | 197. 335  | 5248146. 996 |
| M818T173   | 818. 2449488 | 173. 092  | 12031343. 48 |
| M818T133_1 | 818. 2458258 | 132. 707  | 1654909. 691 |
| M818T152   | 818. 2442366 | 152. 08   | 1567918. 148 |
| M818T296_1 | 818. 2467784 | 295. 704  | 26999288. 9  |
| M818T208_2 | 818. 2663369 | 207. 935  | 14492145. 45 |
| M818T147   | 818. 2672758 | 147. 455  | 5780377. 963 |
| M818T268_1 | 818. 2666973 | 267. 702  | 4816461. 198 |
| M818T122   | 818. 267048  | 122. 381  | 4188852. 78  |
| M818T107_2 | 818. 2660666 | 106. 648  | 21287186. 64 |
| M818T197_2 | 818. 266929  | 197. 335  | 9161653. 804 |

|            |             |         |             |
|------------|-------------|---------|-------------|
| M818T234_1 | 818.2662382 | 233.519 | 4657796.669 |
| M818T172_1 | 818.2669715 | 171.546 | 19355451.22 |
| M818T133_2 | 818.2667669 | 132.707 | 2359196.915 |
| M818T185   | 818.2662463 | 185.252 | 14795942.47 |
| M818T296_2 | 818.2661901 | 295.704 | 30997837.54 |
| M818T249_2 | 818.280441  | 249.466 | 389981.5206 |
| M818T268_2 | 818.2813861 | 268.419 | 268666.8142 |
| M818T274   | 818.2820798 | 273.82  | 208105.461  |
| M818T262   | 818.2812987 | 262.302 | 428160.0877 |
| M818T208_3 | 818.2808307 | 207.935 | 4431008.295 |
| M818T184_2 | 818.2815134 | 183.708 | 4609211.565 |
| M818T197_3 | 818.2848882 | 197.335 | 2815873.636 |
| M818T234_2 | 818.2814887 | 233.519 | 1390245.584 |
| M818T172_2 | 818.2790945 | 171.546 | 5625095.115 |
| M818T296_3 | 818.2774111 | 295.704 | 10456997.53 |
| M819T296_1 | 818.7337777 | 295.704 | 3194181.386 |
| M819T208_1 | 818.7467368 | 207.935 | 6335998.811 |
| M819T184_1 | 818.7467256 | 183.708 | 7854646.782 |
| M819T128_1 | 818.7473975 | 128.279 | 1034573.983 |
| M819T197_1 | 818.7501027 | 197.335 | 4999323.915 |
| M819T172_1 | 818.747157  | 171.546 | 10420227.3  |
| M819T237_1 | 818.7499228 | 236.518 | 1814877.266 |
| M819T152_1 | 818.750158  | 152.08  | 1400701.889 |
| M819T108_1 | 818.7463346 | 108.082 | 8326469.41  |
| M819T296_2 | 818.7467422 | 295.704 | 15873776.88 |
| M819T107_1 | 818.7664301 | 106.648 | 14732309.81 |
| M819T128_2 | 818.7667409 | 128.279 | 1474589.972 |
| M819T208_2 | 818.7746725 | 207.935 | 3970541.14  |
| M819T184_2 | 818.7744667 | 183.708 | 8632772.976 |
| M819T197_2 | 818.7722881 | 197.335 | 4582011.096 |
| M819T172_2 | 818.775353  | 171.546 | 9299934.564 |
| M819T237_2 | 818.7724582 | 236.518 | 3153897.317 |
| M819T152_2 | 818.7723684 | 152.08  | 3451400.063 |
| M819T296_3 | 818.774517  | 295.704 | 15734635.06 |
| M819T272   | 818.7802235 | 272.312 | 265279.4287 |
| M819T277   | 818.7798858 | 277.42  | 573558.7122 |
| M819T266   | 818.7810335 | 265.541 | 277338.2359 |
| M819T259   | 818.780443  | 259.134 | 289963.7521 |
| M819T251   | 818.7808704 | 251.004 | 334824.748  |
| M819T107_2 | 818.7799517 | 106.648 | 5344525.048 |
| M819T215   | 818.7809047 | 215.4   | 1451285.214 |
| M819T296_4 | 818.7855656 | 295.704 | 3368432.37  |
| M819T184_3 | 819.247835  | 183.708 | 3689577.106 |
| M819T172_3 | 819.2473847 | 171.546 | 4714614.87  |
| M819T208_3 | 819.2509635 | 207.935 | 2689177.054 |
| M819T197_3 | 819.2514434 | 197.335 | 2796979.592 |
| M819T294   | 819.2512097 | 294.152 | 8690899.213 |
| M819T238   | 819.2510813 | 238.024 | 963534.9024 |
| M819T108_2 | 819.2509474 | 108.082 | 3551215.222 |
| M819T208_4 | 819.2694031 | 207.935 | 2988130.398 |
| M819T184_4 | 819.2692629 | 183.708 | 5954010.268 |
| M819T197_4 | 819.269097  | 197.335 | 3376999.183 |
| M819T172_4 | 819.2696151 | 171.546 | 8331407.498 |
| M819T296_5 | 819.2687807 | 295.704 | 11408997.47 |

|            |              |          |              |
|------------|--------------|----------|--------------|
| M819T108_3 | 819. 2729402 | 108. 082 | 4327304. 422 |
| M819T296_6 | 819. 2879211 | 295. 704 | 504111. 7152 |
| M819T441_1 | 819. 4252676 | 440. 833 | 1824699. 34  |
| M819T441_2 | 819. 4445426 | 440. 833 | 1687505. 608 |
| M820T669   | 819. 5043723 | 669. 12  | 284440. 7885 |
| M820T184   | 819. 7573995 | 183. 708 | 2097004. 117 |
| M820T107   | 819. 7564876 | 106. 648 | 2117451. 978 |
| M820T173   | 819. 7569737 | 173. 092 | 2338886. 814 |
| M820T296_1 | 819. 7555326 | 295. 704 | 3688583. 78  |
| M820T209   | 819. 7618675 | 209. 472 | 2476642. 863 |
| M820T106   | 819. 7729639 | 105. 537 | 1549610. 872 |
| M820T172   | 819. 7703835 | 171. 546 | 2962551. 042 |
| M820T296_2 | 819. 7722127 | 295. 704 | 3427458. 775 |
| M820T211   | 819. 7759221 | 210. 883 | 1025583. 666 |
| M820T294   | 820. 2631302 | 294. 152 | 835481. 8054 |
| M820T220   | 820. 279947  | 219. 979 | 382091. 9454 |
| M820T528_1 | 820. 3245152 | 527. 688 | 1291032. 032 |
| M820T528_2 | 820. 3467769 | 527. 688 | 2659114. 118 |
| M820T529   | 820. 3587205 | 529. 248 | 621502. 3182 |
| M820T681_1 | 820. 4473122 | 681. 406 | 777627. 0316 |
| M820T681_2 | 820. 4640237 | 681. 406 | 3749096. 38  |
| M821T528_1 | 820. 8269197 | 527. 688 | 500609. 8507 |
| M821T528_2 | 820. 8488821 | 527. 688 | 979052. 6683 |
| M821T142_1 | 821. 3001055 | 141. 655 | 3612038. 891 |
| M821T104_1 | 821. 2983101 | 104. 493 | 4256644. 145 |
| M821T142_2 | 821. 311265  | 141. 655 | 6383429. 466 |
| M821T104_2 | 821. 3119044 | 104. 493 | 7995329. 649 |
| M821T142_3 | 821. 3252157 | 141. 655 | 4537114. 87  |
| M821T104_3 | 821. 325942  | 104. 493 | 5632475. 182 |
| M821T566   | 821. 3704099 | 566. 042 | 1434526. 73  |
| M821T578   | 821. 3717406 | 578. 353 | 234067. 3239 |
| M822T303_1 | 822. 2947524 | 303. 259 | 335541. 7239 |
| M822T303_2 | 822. 3059346 | 303. 259 | 229139. 2361 |
| M822T142   | 822. 3233318 | 141. 655 | 2111645. 532 |
| M822T452_1 | 822. 3505328 | 451. 616 | 276259. 4294 |
| M822T452_2 | 822. 3617227 | 451. 616 | 418713. 8983 |
| M822T455   | 822. 4288398 | 454. 645 | 256289. 5226 |
| M822T681   | 822. 4740557 | 681. 406 | 1013176. 761 |
| M823T318   | 823. 2381708 | 318. 232 | 452787. 9699 |
| M823T142   | 823. 3243692 | 141. 655 | 564527. 6264 |
| M823T455_1 | 823. 441656  | 454. 645 | 297683. 0511 |
| M823T455_2 | 823. 4580979 | 454. 645 | 204255. 5287 |
| M824T563_1 | 823. 9794702 | 562. 946 | 2501812. 035 |
| M824T563_2 | 823. 9988868 | 562. 946 | 2519403. 828 |
| M825T834   | 824. 9232686 | 833. 866 | 317296. 5219 |
| M825T167   | 825. 2378026 | 167. 01  | 657535. 1246 |
| M825T169   | 825. 2546696 | 168. 507 | 565345. 0841 |
| M825T303   | 825. 2491922 | 303. 259 | 227036. 0022 |
| M826T181_1 | 825. 7674166 | 180. 601 | 590483. 7131 |
| M826T181_2 | 825. 7895767 | 180. 601 | 1406428. 729 |
| M826T106_1 | 826. 2730752 | 105. 537 | 2353096. 226 |
| M826T106_2 | 826. 2899253 | 105. 537 | 2133182. 777 |
| M826T172   | 826. 4607769 | 171. 546 | 124197. 4157 |
| M827T172_1 | 827. 2273785 | 171. 546 | 4264230. 349 |

|            |              |          |              |
|------------|--------------|----------|--------------|
| M827T107_1 | 827. 2424211 | 106. 648 | 72452458. 22 |
| M827T172_2 | 827. 2429034 | 171. 546 | 109480263. 3 |
| M827T146_1 | 827. 2426525 | 146. 08  | 14816789. 99 |
| M827T188_1 | 827. 2436278 | 188. 174 | 23440012. 85 |
| M827T297   | 827. 2539101 | 297. 149 | 811592. 933  |
| M827T107_2 | 827. 2593233 | 106. 648 | 184948867. 9 |
| M827T188_2 | 827. 2592176 | 188. 174 | 59709316. 56 |
| M827T172_3 | 827. 2595014 | 171. 546 | 271564631. 2 |
| M827T146_2 | 827. 2595728 | 146. 08  | 37000183. 47 |
| M827T308   | 827. 2710079 | 307. 616 | 498525. 6347 |
| M827T107_3 | 827. 2706074 | 106. 648 | 175987882. 7 |
| M827T188_3 | 827. 2704997 | 188. 174 | 56479000. 9  |
| M827T172_4 | 827. 2707831 | 171. 546 | 254929067. 7 |
| M827T146_3 | 827. 2708524 | 146. 08  | 34633623. 69 |
| M827T107_4 | 827. 2875338 | 106. 648 | 62075951. 39 |
| M827T188_4 | 827. 2817813 | 188. 174 | 19695531. 37 |
| M827T172_5 | 827. 2852476 | 171. 546 | 88789656. 63 |
| M827T146_4 | 827. 2821306 | 146. 08  | 11837582. 81 |
| M827T188_5 | 827. 2986609 | 188. 174 | 2661539. 446 |
| M827T146_5 | 827. 296557  | 146. 08  | 2513182. 082 |
| M827T497   | 827. 4217703 | 496. 646 | 556379. 8679 |
| M827T498   | 827. 4595358 | 498. 202 | 284745. 8032 |
| M827T822_1 | 827. 457252  | 821. 831 | 1051382. 262 |
| M827T707_1 | 827. 467981  | 707. 143 | 826219. 4596 |
| M827T767_1 | 827. 4616044 | 767. 145 | 1750534. 541 |
| M827T634_1 | 827. 4679759 | 633. 832 | 3204951. 562 |
| M827T822_2 | 827. 4684843 | 821. 831 | 3622442. 73  |
| M827T678   | 827. 4686098 | 678. 416 | 2092353. 141 |
| M827T767_2 | 827. 4797259 | 767. 145 | 3559620. 115 |
| M827T707_2 | 827. 4864882 | 707. 143 | 792185. 0906 |
| M827T680   | 827. 4855841 | 679. 873 | 2110642. 115 |
| M827T822_3 | 827. 4854194 | 821. 831 | 3583661. 794 |
| M827T634_2 | 827. 4849031 | 633. 832 | 3153988. 878 |
| M827T767_3 | 827. 4927754 | 767. 145 | 1519355. 284 |
| M827T823   | 827. 4967557 | 823. 375 | 865590. 9496 |
| M828T188_1 | 828. 2460873 | 188. 174 | 4799230. 861 |
| M828T172_1 | 828. 2447398 | 171. 546 | 20868368. 05 |
| M828T203   | 828. 2590629 | 203. 346 | 1306804. 569 |
| M828T107_1 | 828. 2585468 | 106. 648 | 49098883. 28 |
| M828T188_2 | 828. 2585385 | 188. 174 | 18050092. 46 |
| M828T172_2 | 828. 2588669 | 171. 546 | 76689614. 29 |
| M828T146   | 828. 2589206 | 146. 08  | 12101594. 48 |
| M828T147   | 828. 2807049 | 147. 455 | 7658629. 98  |
| M828T188_3 | 828. 2811441 | 188. 174 | 11720528. 7  |
| M828T172_3 | 828. 2846296 | 171. 546 | 49131149. 58 |
| M828T107_2 | 828. 2859795 | 106. 648 | 32668180. 94 |
| M828T385_1 | 828. 3832843 | 385. 225 | 739244. 0285 |
| M828T385_2 | 828. 3945787 | 385. 225 | 846036. 2217 |
| M828T385_3 | 828. 4069109 | 385. 225 | 246006. 5712 |
| M828T497   | 828. 4290489 | 496. 646 | 376192. 0015 |
| M828T766   | 828. 4661802 | 765. 588 | 1354418. 69  |
| M828T687_1 | 828. 4739159 | 687. 214 | 422678. 6036 |
| M828T634_1 | 828. 4740434 | 633. 832 | 1348625. 497 |
| M828T678_1 | 828. 474122  | 678. 416 | 982000. 2251 |

|            |              |          |              |
|------------|--------------|----------|--------------|
| M828T767   | 828. 4800011 | 767. 145 | 1690382. 485 |
| M828T687_2 | 828. 4908737 | 687. 214 | 325625. 6425 |
| M828T634_2 | 828. 4881775 | 633. 832 | 1469847. 47  |
| M828T678_2 | 828. 4910402 | 678. 416 | 707087. 2326 |
| M829T172_1 | 829. 2457084 | 171. 546 | 4158028. 469 |
| M829T188_1 | 829. 2580951 | 188. 174 | 5535612. 349 |
| M829T146_1 | 829. 2580079 | 146. 08  | 3015488. 298 |
| M829T107_1 | 829. 2660879 | 106. 648 | 19572669. 77 |
| M829T172_2 | 829. 2574943 | 171. 546 | 22490233. 44 |
| M829T188_2 | 829. 2731691 | 188. 174 | 7763388. 273 |
| M829T172_3 | 829. 2735344 | 171. 546 | 32046119. 85 |
| M829T146_2 | 829. 2728281 | 146. 08  | 4161458. 524 |
| M829T147   | 829. 2864131 | 147. 455 | 1977956. 156 |
| M829T107_2 | 829. 2905449 | 106. 648 | 3784372. 596 |
| M829T172_4 | 829. 2953143 | 171. 546 | 2979374. 059 |
| M829T481   | 829. 4133021 | 481. 089 | 132180. 4455 |
| M829T578_1 | 829. 4411591 | 578. 353 | 235172. 5882 |
| M829T681_1 | 829. 465946  | 681. 406 | 13610434. 02 |
| M829T578_2 | 829. 4637975 | 578. 353 | 432290. 0489 |
| M829T790_1 | 829. 4703423 | 790. 161 | 4019831. 949 |
| M829T801_1 | 829. 470098  | 800. 683 | 3626641. 319 |
| M829T681_2 | 829. 481651  | 681. 406 | 115044221    |
| M829T790_2 | 829. 4873209 | 790. 161 | 24351555. 74 |
| M829T772   | 829. 4925512 | 771. 785 | 59740683. 59 |
| M829T801_2 | 829. 4870896 | 800. 683 | 23207277. 24 |
| M829T681_3 | 829. 4986388 | 681. 406 | 157956852. 9 |
| M830T681_1 | 829. 5184535 | 681. 406 | 23249090. 49 |
| M830T68_1  | 830. 2125849 | 67. 6441 | 140621. 6637 |
| M830T68_2  | 830. 2352615 | 67. 6441 | 128243. 7349 |
| M830T107_1 | 830. 2637225 | 106. 648 | 2495312. 538 |
| M830T172_1 | 830. 2580535 | 171. 546 | 2719852. 804 |
| M830T107_2 | 830. 2806976 | 106. 648 | 3145470. 697 |
| M830T172_2 | 830. 2807213 | 171. 546 | 5291424. 58  |
| M830T172_3 | 830. 2920483 | 171. 546 | 1578189. 344 |
| M830T578   | 830. 468027  | 578. 353 | 144528. 285  |
| M830T681_2 | 830. 4710109 | 681. 406 | 13527017. 27 |
| M830T681_3 | 830. 4908626 | 681. 406 | 77751012. 15 |
| M831T681   | 830. 5078797 | 681. 406 | 49823523. 08 |
| M831T69_1  | 830. 7122622 | 69. 1983 | 138839. 5846 |
| M831T69_2  | 830. 7349839 | 69. 1983 | 171655. 748  |
| M831T172   | 831. 2918087 | 171. 546 | 297146. 3012 |
| M831T452_1 | 831. 3707503 | 451. 616 | 177603. 8938 |
| M831T452_2 | 831. 3880834 | 451. 616 | 121851. 0795 |
| M831T545_1 | 831. 4563202 | 544. 759 | 1223724. 324 |
| M831T535_1 | 831. 4558345 | 535. 488 | 586524. 0204 |
| M831T545_2 | 831. 4676908 | 544. 759 | 3053603. 098 |
| M831T535_2 | 831. 467207  | 535. 488 | 1404739. 027 |
| M831T545_3 | 831. 4790605 | 544. 759 | 2793785. 106 |
| M831T535_3 | 831. 478574  | 535. 488 | 1221347. 654 |
| M831T534   | 831. 4925774 | 533. 931 | 155372. 7779 |
| M832T681   | 831. 5019079 | 681. 406 | 23740965. 95 |
| M832T220_1 | 832. 2396101 | 219. 979 | 2027366. 462 |
| M832T296_1 | 832. 2525102 | 295. 704 | 4007159. 08  |
| M832T220_2 | 832. 2528493 | 219. 979 | 4266481. 35  |



|            |              |          |              |
|------------|--------------|----------|--------------|
| M832T220_3 | 832. 2655011 | 219. 979 | 3135159. 754 |
| M832T296_2 | 832. 2692907 | 295. 704 | 2326677. 779 |
| M832T606_1 | 832. 4466366 | 606. 096 | 986121. 0506 |
| M832T669_1 | 832. 4521488 | 669. 12  | 20750254. 1  |
| M832T606_2 | 832. 4693728 | 606. 096 | 4923440. 905 |
| M832T669_2 | 832. 4749249 | 669. 12  | 37743783. 26 |
| M832T606_3 | 832. 4855021 | 606. 096 | 1235043. 185 |
| M833T220_1 | 832. 7414627 | 219. 979 | 1064740. 807 |
| M833T296_1 | 832. 7467499 | 295. 704 | 2282973. 475 |
| M833T209   | 832. 7481389 | 209. 472 | 1065961. 583 |
| M833T220_2 | 832. 7539842 | 219. 979 | 2512573. 199 |
| M833T296_2 | 832. 7664263 | 295. 704 | 2374737. 789 |
| M833T220_3 | 832. 7710342 | 219. 979 | 2446976. 642 |
| M833T220_4 | 833. 2552631 | 219. 979 | 1320215. 834 |
| M833T296_3 | 833. 2518404 | 295. 704 | 1120474. 894 |
| M833T220_5 | 833. 2678101 | 219. 979 | 1145722. 564 |
| M833T296_4 | 833. 2667752 | 295. 704 | 1111875. 415 |
| M833T606_1 | 833. 4556759 | 606. 096 | 985910. 1698 |
| M833T606_2 | 833. 4785003 | 606. 096 | 1857632. 538 |
| M835T563_1 | 835. 4354064 | 562. 946 | 12586453. 66 |
| M835T563_2 | 835. 4558322 | 562. 946 | 82867267. 54 |
| M835T563_3 | 835. 4787309 | 562. 946 | 21201227. 88 |
| M835T669   | 835. 4902511 | 669. 12  | 534852. 1075 |
| M836T184_1 | 836. 2326731 | 183. 708 | 1728655. 364 |
| M836T296_1 | 836. 2342472 | 295. 704 | 1425499. 128 |
| M836T184_2 | 836. 2543558 | 183. 708 | 2267030. 114 |
| M836T296_2 | 836. 2513857 | 295. 704 | 2471607. 956 |
| M836T563_1 | 836. 44149   | 562. 946 | 7201740. 453 |
| M836T563_2 | 836. 4644318 | 562. 946 | 40443320. 58 |
| M836T563_3 | 836. 4843071 | 562. 946 | 10778601. 38 |
| M837T184   | 836. 7386841 | 183. 708 | 498787. 506  |
| M837T296_1 | 836. 7445083 | 295. 704 | 1619014. 317 |
| M837T296_2 | 836. 7559794 | 295. 704 | 1427666. 091 |
| M837T296_3 | 837. 2321811 | 295. 704 | 756251. 068  |
| M837T315   | 837. 2381309 | 315. 162 | 983544. 4384 |
| M837T296_4 | 837. 2437907 | 295. 704 | 1734369. 276 |
| M837T314   | 837. 2554173 | 313. 612 | 1168527. 478 |
| M837T296_5 | 837. 255298  | 295. 704 | 1676880. 916 |
| M837T563_1 | 837. 4448291 | 562. 946 | 17965371. 94 |
| M837T563_2 | 837. 4678169 | 562. 946 | 23102734. 25 |
| M838T184_1 | 837. 732798  | 183. 708 | 338488. 9585 |
| M838T184_2 | 837. 7558048 | 183. 708 | 430738. 6923 |
| M838T455_1 | 838. 4328226 | 454. 645 | 177742. 2621 |
| M838T455_2 | 838. 4463084 | 454. 645 | 157686. 2346 |
| M839T82_1  | 839. 2125306 | 81. 8855 | 3281985. 912 |
| M839T82_2  | 839. 2240511 | 81. 8855 | 8108047. 239 |
| M839T98    | 839. 3085887 | 97. 682  | 11778413. 23 |
| M839T563   | 839. 4500293 | 562. 946 | 2123595. 663 |
| M840T82    | 840. 2391393 | 81. 8855 | 1963947. 867 |
| M841T563_1 | 840. 9677344 | 562. 946 | 2596193. 174 |
| M841T563_2 | 840. 9863924 | 562. 946 | 2202722. 622 |
| M841T246   | 841. 2345765 | 246. 013 | 609811. 5709 |
| M841T264_1 | 841. 245512  | 263. 845 | 1101297. 279 |
| M841T208   | 841. 2426927 | 207. 935 | 18812661. 83 |

|            |              |          |              |
|------------|--------------|----------|--------------|
| M841T271   | 841. 2455072 | 270. 519 | 914391. 5773 |
| M841T107_1 | 841. 2423718 | 106. 648 | 21721527. 74 |
| M841T197_1 | 841. 2424059 | 197. 335 | 12595854. 71 |
| M841T172_1 | 841. 2424881 | 171. 546 | 16335464. 93 |
| M841T130_1 | 841. 2429678 | 129. 827 | 8007328. 852 |
| M841T279_1 | 841. 2454421 | 278. 627 | 2737715. 846 |
| M841T294_1 | 841. 2423728 | 294. 152 | 42041718. 47 |
| M841T185_1 | 841. 2424204 | 185. 252 | 31528966. 5  |
| M841T235_1 | 841. 2424707 | 234. 972 | 10281157. 1  |
| M841T256   | 841. 2455839 | 255. 831 | 878503. 9556 |
| M841T269   | 841. 2686638 | 269. 337 | 1228939. 346 |
| M841T264_2 | 841. 2686466 | 263. 845 | 2382084. 207 |
| M841T209_1 | 841. 2686534 | 209. 472 | 40784132. 83 |
| M841T107_2 | 841. 2683014 | 106. 648 | 48985249. 61 |
| M841T197_2 | 841. 2684411 | 197. 335 | 28196258. 59 |
| M841T172_2 | 841. 2685152 | 171. 546 | 36056855. 5  |
| M841T255_1 | 841. 2687277 | 255. 113 | 2140561. 805 |
| M841T149   | 841. 2688524 | 148. 981 | 11587239. 13 |
| M841T130_2 | 841. 2683698 | 129. 827 | 18275706. 32 |
| M841T279_2 | 841. 2685761 | 278. 627 | 5864706. 755 |
| M841T294_2 | 841. 2684092 | 294. 152 | 95689177. 94 |
| M841T185_2 | 841. 2684505 | 185. 252 | 71502658. 69 |
| M841T235_2 | 841. 2685019 | 234. 972 | 23384059. 25 |
| M841T272   | 841. 2874929 | 272. 312 | 217909. 8444 |
| M841T279_3 | 841. 2819402 | 278. 627 | 1900608. 207 |
| M841T209_2 | 841. 280715  | 209. 472 | 13120586. 27 |
| M841T264_3 | 841. 2829339 | 263. 845 | 763688. 1605 |
| M841T107_3 | 841. 282766  | 106. 648 | 16453974. 49 |
| M841T197_3 | 841. 2825586 | 197. 335 | 9487016. 783 |
| M841T172_3 | 841. 2816757 | 171. 546 | 11966995. 58 |
| M841T255_2 | 841. 2812452 | 255. 113 | 951141. 3175 |
| M841T130_3 | 841. 2823349 | 129. 827 | 6034241. 192 |
| M841T294_3 | 841. 2820299 | 294. 152 | 32668995. 77 |
| M841T185_3 | 841. 2818764 | 185. 252 | 24320659. 58 |
| M841T235_3 | 841. 2813968 | 234. 972 | 8145750. 541 |
| M841T152   | 841. 2822208 | 152. 08  | 2975405. 566 |
| M841T492_1 | 841. 4014645 | 491. 99  | 134746. 9917 |
| M841T492_2 | 841. 4178545 | 491. 99  | 92422. 62169 |
| M841T563_3 | 841. 465358  | 562. 946 | 1424875. 703 |
| M841T520   | 841. 4761551 | 519. 998 | 7266069. 74  |
| M842T274   | 841. 7403158 | 273. 82  | 354374. 2993 |
| M842T269   | 841. 7403298 | 269. 337 | 335145. 6605 |
| M842T209_1 | 841. 7402883 | 209. 472 | 7283244. 248 |
| M842T197_1 | 841. 7402497 | 197. 335 | 4635140. 54  |
| M842T237   | 841. 7405215 | 236. 518 | 3884446. 959 |
| M842T257_1 | 841. 7404195 | 257. 001 | 345999. 9248 |
| M842T294_1 | 841. 7401336 | 294. 152 | 16290369. 05 |
| M842T185_1 | 841. 740042  | 185. 252 | 12785457. 72 |
| M842T107_1 | 841. 74561   | 106. 648 | 17074077. 71 |
| M842T209_2 | 841. 7547625 | 209. 472 | 25411840. 69 |
| M842T197_2 | 841. 7547229 | 197. 335 | 16286006. 99 |
| M842T172_1 | 841. 7546261 | 171. 546 | 22315075. 82 |
| M842T294_2 | 841. 7546091 | 294. 152 | 57362886. 92 |
| M842T185_2 | 841. 7545121 | 185. 252 | 45441632. 31 |

|            |              |           |              |
|------------|--------------|-----------|--------------|
| M842T235_1 | 841. 7544586 | 234. 972  | 15471616. 99 |
| M842T107_2 | 841. 7661386 | 106. 648  | 42096730. 3  |
| M842T184_1 | 841. 7777278 | 183. 708  | 46667700. 14 |
| M842T235_2 | 841. 7776194 | 234. 972  | 9116501. 147 |
| M842T275   | 841. 7812591 | 275. 0285 | 465772. 7739 |
| M842T268_1 | 841. 7808562 | 267. 702  | 705243. 2932 |
| M842T251   | 841. 7812466 | 251. 004  | 826596. 4123 |
| M842T257_2 | 841. 7816309 | 257. 001  | 679745. 0742 |
| M842T208_1 | 841. 7780319 | 207. 935  | 14758325. 51 |
| M842T107_3 | 841. 7806149 | 106. 648  | 20281684. 24 |
| M842T294_3 | 841. 7806665 | 294. 152  | 34787796. 67 |
| M842T273   | 842. 2410909 | 273. 232  | 188209. 1339 |
| M842T277   | 842. 2417935 | 277. 42   | 174255. 6354 |
| M842T268_2 | 842. 2420699 | 268. 419  | 273409. 5625 |
| M842T208_2 | 842. 2416858 | 207. 935  | 3549507. 374 |
| M842T197_3 | 842. 2411501 | 197. 335  | 3602279. 356 |
| M842T215   | 842. 2423668 | 215. 4    | 2218374. 403 |
| M842T294_4 | 842. 2411467 | 294. 152  | 12664599. 09 |
| M842T185_3 | 842. 2411784 | 185. 252  | 9673942. 089 |
| M842T172_2 | 842. 2442212 | 171. 546  | 4722357. 737 |
| M842T255   | 842. 2431612 | 255. 113  | 398368. 5249 |
| M842T235_3 | 842. 243637  | 234. 972  | 2800674. 143 |
| M842T107_4 | 842. 2525185 | 106. 648  | 12228480. 56 |
| M842T208_3 | 842. 2589249 | 207. 935  | 9494196. 427 |
| M842T184_2 | 842. 2585846 | 183. 708  | 44396046. 65 |
| M842T294_5 | 842. 2585327 | 294. 152  | 34213581. 76 |
| M842T235_4 | 842. 2587737 | 234. 972  | 7695733. 789 |
| M842T208_4 | 842. 2705118 | 207. 935  | 9475712. 95  |
| M842T184_3 | 842. 2701731 | 183. 708  | 44753601. 18 |
| M842T107_5 | 842. 2757011 | 106. 648  | 12434253. 16 |
| M842T294_6 | 842. 2701239 | 294. 152  | 34520624. 43 |
| M842T235_5 | 842. 2703568 | 234. 972  | 7790215. 954 |
| M842T208_5 | 842. 2869822 | 207. 935  | 3495680. 253 |
| M842T184_4 | 842. 2845301 | 183. 708  | 16714873. 1  |
| M842T234   | 842. 2857465 | 233. 519  | 2900001. 691 |
| M842T294_7 | 842. 2874923 | 294. 152  | 12997666. 64 |
| M843T208_1 | 842. 7492187 | 207. 935  | 1737278. 158 |
| M843T184_1 | 842. 7492799 | 183. 708  | 8153856. 94  |
| M843T237_1 | 842. 7492217 | 236. 518  | 980356. 4315 |
| M843T294_1 | 842. 7561612 | 294. 152  | 10031581. 48 |
| M843T108_1 | 842. 7566209 | 108. 082  | 5805815. 79  |
| M843T208_2 | 842. 7634304 | 207. 935  | 3519980. 359 |
| M843T184_2 | 842. 7628894 | 183. 708  | 17173958. 85 |
| M843T215_1 | 842. 763396  | 215. 4    | 2541028. 668 |
| M843T237_2 | 842. 7630359 | 236. 518  | 3159087. 746 |
| M843T294_2 | 842. 7743462 | 294. 152  | 9987993. 782 |
| M843T108_2 | 842. 7746468 | 108. 082  | 5224479. 161 |
| M843T237_3 | 842. 7800929 | 236. 518  | 1513213. 104 |
| M843T215_2 | 842. 7749771 | 215. 4    | 2095760. 253 |
| M843T184_3 | 842. 784868  | 183. 708  | 8804893. 978 |
| M843T102   | 843. 2534049 | 101. 563  | 2123430. 353 |
| M843T184_4 | 843. 2530329 | 183. 708  | 4306618. 544 |
| M843T108_3 | 843. 2553496 | 108. 082  | 1171660. 643 |
| M843T296   | 843. 2560572 | 295. 704  | 2946855. 806 |

|            |              |          |              |
|------------|--------------|----------|--------------|
| M843T107   | 843. 2683331 | 106. 648 | 3799284. 166 |
| M843T209   | 843. 2735025 | 209. 472 | 783029. 7447 |
| M843T184_5 | 843. 2738414 | 183. 708 | 3108114. 51  |
| M843T172   | 843. 2742292 | 171. 546 | 1533746. 739 |
| M843T294_3 | 843. 2763179 | 294. 152 | 3985032. 488 |
| M843T199   | 843. 2731797 | 198. 821 | 1114728. 149 |
| M843T623_1 | 843. 4306436 | 623. 098 | 1939211. 917 |
| M843T623_2 | 843. 4509669 | 623. 098 | 4969501. 025 |
| M843T640   | 843. 4524007 | 640. 057 | 724221. 8271 |
| M843T581_1 | 843. 4598293 | 581. 442 | 13727671. 47 |
| M843T603_1 | 843. 4597833 | 603. 04  | 3172984. 102 |
| M843T622_1 | 843. 4654769 | 621. 547 | 11026313. 55 |
| M843T704_1 | 843. 465858  | 704. 046 | 1320397. 223 |
| M843T581_2 | 843. 4859581 | 581. 442 | 13698148. 08 |
| M843T603_2 | 843. 4859078 | 603. 04  | 3173599. 089 |
| M843T622_2 | 843. 4829023 | 621. 547 | 7605861. 768 |
| M843T704_2 | 843. 4831593 | 704. 046 | 843935. 119  |
| M843T520   | 843. 4885495 | 519. 998 | 1744299. 981 |
| M843T581_3 | 843. 4975622 | 581. 442 | 2938853. 069 |
| M844T185   | 843. 7843037 | 185. 252 | 114840. 6936 |
| M844T623   | 844. 4565897 | 623. 098 | 2865015. 331 |
| M844T581_1 | 844. 459658  | 581. 442 | 4898066. 59  |
| M844T603_1 | 844. 4597682 | 603. 04  | 1025412. 19  |
| M844T704   | 844. 4645267 | 704. 046 | 433205. 1519 |
| M844T581_2 | 844. 4712908 | 581. 442 | 10633453. 19 |
| M844T603_2 | 844. 4713997 | 603. 04  | 2256984. 296 |
| M844T622_1 | 844. 4712298 | 621. 547 | 5508711. 373 |
| M844T640   | 844. 4822192 | 640. 057 | 1124868. 802 |
| M844T581_3 | 844. 4863492 | 581. 442 | 8019690. 811 |
| M844T603_3 | 844. 4859328 | 603. 04  | 1879334. 648 |
| M844T622_2 | 844. 4828658 | 621. 547 | 4575908. 024 |
| M844T566   | 844. 4859701 | 566. 042 | 673840. 0466 |
| M844T592   | 844. 4962661 | 592. 284 | 432243. 8271 |
| M845T520   | 844. 5127668 | 519. 998 | 291668. 9029 |
| M845T563_1 | 844. 6761081 | 562. 946 | 3359982. 938 |
| M845T562   | 844. 6989868 | 561. 624 | 7039687. 537 |
| M845T563_2 | 844. 7159135 | 562. 946 | 2609281. 226 |
| M845T99_1  | 845. 2531995 | 98. 9649 | 150031837. 3 |
| M845T124_1 | 845. 2685036 | 123. 792 | 9763364. 499 |
| M845T98_1  | 845. 2691845 | 97. 682  | 602307214    |
| M845T124_2 | 845. 2801413 | 123. 792 | 9456469. 807 |
| M845T98_2  | 845. 280837  | 97. 682  | 586056316. 4 |
| M845T98_3  | 845. 2924888 | 97. 682  | 208475222. 3 |
| M845T99_2  | 845. 3040993 | 98. 9649 | 25790240. 72 |
| M845T601_1 | 845. 4590835 | 601. 473 | 1108249. 495 |
| M845T563_3 | 845. 4587531 | 562. 946 | 829022240. 2 |
| M845T769   | 845. 474176  | 768. 696 | 637101. 2428 |
| M845T601_2 | 845. 4707348 | 601. 473 | 2160738. 456 |
| M845T581_1 | 845. 47048   | 581. 442 | 15476740. 88 |
| M845T622_1 | 845. 4710637 | 621. 547 | 2360909. 941 |
| M845T651_1 | 845. 4708101 | 650. 74  | 14226867. 43 |
| M845T563_4 | 845. 4704093 | 562. 946 | 1741078147   |
| M845T622_2 | 845. 4902114 | 621. 547 | 2898737. 617 |
| M845T447   | 845. 4843327 | 446. 967 | 295221. 1631 |

|            |             |         |             |
|------------|-------------|---------|-------------|
| M845T581_2 | 845.4908669 | 581.442 | 26651985.22 |
| M845T651_2 | 845.4905925 | 650.74  | 27806059.04 |
| M845T563_5 | 845.490808  | 562.946 | 3476138224  |
| M846T580_1 | 845.5042887 | 579.883 | 11593140.19 |
| M846T651_1 | 845.5051345 | 650.74  | 11539832.84 |
| M846T563_1 | 845.505379  | 562.946 | 1622330822  |
| M846T563_2 | 845.9650143 | 562.946 | 14981404.61 |
| M846T98_1  | 846.254884  | 97.682  | 30985384.01 |
| M846T98_2  | 846.2664762 | 97.682  | 141783733.4 |
| M846T98_3  | 846.2898185 | 97.682  | 140759037.3 |
| M846T98_4  | 846.3090122 | 97.682  | 9321082.066 |
| M846T580_2 | 846.457262  | 579.883 | 625363.0698 |
| M846T563_3 | 846.4563667 | 562.946 | 48901427.91 |
| M846T681_1 | 846.4592307 | 681.406 | 4981760.468 |
| M846T649   | 846.4724679 | 649.195 | 5864373.265 |
| M846T581   | 846.4771854 | 581.442 | 6709905.976 |
| M846T681_2 | 846.4767338 | 681.406 | 30612427.26 |
| M846T622   | 846.4763856 | 621.547 | 1187889.596 |
| M846T563_4 | 846.4767915 | 562.946 | 870582280.7 |
| M846T772_1 | 846.4822035 | 771.785 | 3105689.739 |
| M846T681_3 | 846.4942432 | 681.406 | 20356564.87 |
| M846T651_2 | 846.4888048 | 650.74  | 12843906.97 |
| M847T580   | 846.500168  | 579.883 | 9255972.717 |
| M846T772_2 | 846.4938325 | 771.785 | 2218912.345 |
| M847T563_1 | 846.5001457 | 562.946 | 1234029222  |
| M847T681_1 | 846.5093148 | 681.406 | 3424109.865 |
| M847T770   | 846.5054037 | 770.235 | 627289.2182 |
| M847T651_1 | 846.506064  | 650.74  | 5248339.327 |
| M847T563_2 | 846.5176624 | 562.946 | 324041727.9 |
| M847T99_1  | 847.2712775 | 98.9649 | 59822304.31 |
| M847T99_2  | 847.2888103 | 98.9649 | 60872025.82 |
| M847T563_3 | 847.4617731 | 562.946 | 25774345.48 |
| M847T681_2 | 847.4702711 | 681.406 | 6841781.122 |
| M847T651_2 | 847.487823  | 650.74  | 3351541.258 |
| M847T583   | 847.4877785 | 582.96  | 6148459.773 |
| M847T563_4 | 847.488088  | 562.946 | 461129332.8 |
| M847T681_3 | 847.4936572 | 681.406 | 12449526.33 |
| M848T651   | 847.5053623 | 650.74  | 2057522.933 |
| M848T583_1 | 847.5053022 | 582.96  | 8208971.53  |
| M848T563_1 | 847.5056343 | 562.946 | 297497309.8 |
| M848T681   | 847.5053471 | 681.406 | 3648115.81  |
| M848T583_2 | 847.5198953 | 582.96  | 3323088.163 |
| M848T563_2 | 847.5202548 | 562.946 | 62605661.79 |
| M848T562   | 847.9853162 | 561.624 | 1064181.583 |
| M848T563_3 | 848.0010877 | 562.946 | 661653.0306 |
| M848T99_1  | 848.2721694 | 98.9649 | 9036002.548 |
| M848T99_2  | 848.2955667 | 98.9649 | 7885902.098 |
| M848T563_4 | 848.4663217 | 562.946 | 4215063.486 |
| M848T563_5 | 848.4892345 | 562.946 | 94030005.1  |
| M849T563_1 | 848.5126724 | 562.946 | 39998481.35 |
| M849T563_2 | 848.5243874 | 562.946 | 4982998.104 |
| M849T170_1 | 849.2197571 | 170.049 | 1161606.291 |
| M849T170_2 | 849.2431878 | 170.049 | 1613484.804 |
| M849T563_3 | 849.480272  | 562.946 | 6507614.719 |

|            |              |          |              |
|------------|--------------|----------|--------------|
| M850T681   | 849. 5030631 | 681. 406 | 516099. 7378 |
| M850T563   | 849. 5036764 | 562. 946 | 18501508. 54 |
| M851T362   | 851. 3031015 | 362. 384 | 499760. 5868 |
| M851T462   | 851. 461631  | 462. 446 | 606761. 9111 |
| M852T185   | 852. 236584  | 185. 252 | 1166191. 978 |
| M852T184   | 852. 2585196 | 183. 708 | 1062485. 28  |
| M853T185_1 | 852. 7352312 | 185. 252 | 367405. 5664 |
| M853T185_2 | 852. 747113  | 185. 252 | 933447. 6758 |
| M853T185_3 | 852. 7648468 | 185. 252 | 566616. 0934 |
| M855T206_1 | 855. 2432393 | 206. 399 | 2292499. 095 |
| M855T194_1 | 855. 2437836 | 194. 243 | 5675769. 314 |
| M855T154_1 | 855. 245251  | 153. 601 | 1446505. 566 |
| M855T220   | 855. 2435414 | 219. 979 | 1500070. 375 |
| M855T108_1 | 855. 2508651 | 108. 082 | 5399232. 636 |
| M855T296_1 | 855. 2509042 | 295. 704 | 7244321. 054 |
| M855T221_1 | 855. 2572588 | 221. 453 | 2818615. 391 |
| M855T206_2 | 855. 2570617 | 206. 399 | 4492816. 069 |
| M855T164_1 | 855. 2564996 | 164. 077 | 2350227. 757 |
| M855T194_2 | 855. 2569274 | 194. 243 | 10990745. 55 |
| M855T154_2 | 855. 2571073 | 153. 601 | 2741043. 956 |
| M855T108_2 | 855. 2686565 | 108. 082 | 5019038. 658 |
| M855T296_2 | 855. 2686624 | 295. 704 | 7027363. 544 |
| M855T221_2 | 855. 2691157 | 221. 453 | 2062511. 475 |
| M855T269   | 855. 2736923 | 269. 337 | 792884. 2342 |
| M855T206_3 | 855. 2689205 | 206. 399 | 3347105. 909 |
| M855T164_2 | 855. 2734207 | 164. 077 | 1000684. 444 |
| M855T194_3 | 855. 2687852 | 194. 243 | 8209102. 785 |
| M855T154_3 | 855. 2689631 | 153. 601 | 1943477. 589 |
| M855T296_3 | 855. 280719  | 295. 704 | 1796449. 666 |
| M855T594_1 | 855. 470457  | 593. 841 | 3946033. 282 |
| M855T594_2 | 855. 4912919 | 593. 841 | 1268268. 062 |
| M856T220_1 | 855. 7429694 | 219. 979 | 483184. 886  |
| M856T296_1 | 855. 7500035 | 295. 704 | 806354. 6715 |
| M856T220_2 | 855. 7548394 | 219. 979 | 1236256. 662 |
| M856T297   | 855. 7683356 | 297. 149 | 929399. 3329 |
| M856T220_3 | 855. 7726353 | 219. 979 | 746182. 653  |
| M856T206_1 | 856. 2485646 | 206. 399 | 678150. 5599 |
| M856T194_1 | 856. 2479584 | 194. 243 | 1896431. 787 |
| M856T154   | 856. 2508166 | 153. 601 | 2144195. 099 |
| M856T221   | 856. 2601672 | 221. 453 | 823237. 6254 |
| M856T108   | 856. 2539437 | 108. 082 | 2172842. 495 |
| M856T296_2 | 856. 2544086 | 295. 704 | 2983019. 728 |
| M856T206_2 | 856. 2604379 | 206. 399 | 1363757. 363 |
| M856T194_2 | 856. 2598277 | 194. 243 | 3812994. 65  |
| M856T107   | 856. 2658231 | 106. 648 | 2180688. 746 |
| M856T206_3 | 856. 2723132 | 206. 399 | 1010929. 996 |
| M856T194_3 | 856. 2720308 | 194. 243 | 2895365. 244 |
| M856T152   | 856. 2727893 | 152. 08  | 808807. 5936 |
| M856T296_3 | 856. 2716941 | 295. 704 | 3028177. 71  |
| M857T297_1 | 857. 2533319 | 297. 149 | 607928. 7419 |
| M857T194_1 | 857. 2535811 | 194. 243 | 813662. 5227 |
| M857T297_2 | 857. 2770404 | 297. 149 | 698220. 5853 |
| M857T194_2 | 857. 2773806 | 194. 243 | 798810. 0869 |
| M858T718   | 858. 4801306 | 717. 942 | 546673. 5129 |

|            |              |          |              |
|------------|--------------|----------|--------------|
| M859T718   | 858. 5039931 | 717. 942 | 404993. 7975 |
| M859T184   | 859. 2350334 | 183. 708 | 392860. 8773 |
| M859T486_1 | 859. 4363176 | 485. 784 | 501210. 2542 |
| M859T557   | 859. 4438264 | 557. 078 | 184336. 6279 |
| M859T568_1 | 859. 4497408 | 567. 543 | 596241. 732  |
| M859T486_2 | 859. 4533789 | 485. 784 | 7547166. 69  |
| M859T503_1 | 859. 4503841 | 502. 873 | 2612736. 68  |
| M859T568_2 | 859. 4726634 | 567. 543 | 869776. 044  |
| M859T486_3 | 859. 4772752 | 485. 784 | 9028387. 692 |
| M859T503_2 | 859. 4770739 | 502. 873 | 3181304. 998 |
| M859T720   | 859. 4891705 | 719. 505 | 167118. 3826 |
| M859T486_4 | 859. 4892199 | 485. 784 | 2133196. 362 |
| M860T720   | 859. 5028766 | 719. 505 | 119199. 9867 |
| M860T669   | 859. 5135922 | 669. 12  | 451905. 3833 |
| M860T184   | 860. 2219853 | 183. 708 | 807632. 8801 |
| M860T294_1 | 860. 2233361 | 294. 152 | 915803. 035  |
| M860T185   | 860. 2400406 | 185. 252 | 1574936. 604 |
| M860T294_2 | 860. 2464641 | 294. 152 | 999191. 7853 |
| M860T581_1 | 860. 4461607 | 581. 442 | 1821359. 172 |
| M860T581_2 | 860. 4581348 | 581. 442 | 4172722. 362 |
| M860T581_3 | 860. 4760941 | 581. 442 | 2278784. 612 |
| M861T184   | 860. 725987  | 183. 708 | 616131. 1435 |
| M861T462_1 | 861. 4463    | 462. 446 | 491578. 6786 |
| M861T545_1 | 861. 4646703 | 544. 759 | 927025. 3817 |
| M861T462_2 | 861. 4642872 | 462. 446 | 9140125. 453 |
| M861T486_1 | 861. 4640574 | 485. 784 | 1764394. 41  |
| M861T581   | 861. 4693137 | 581. 442 | 3192959. 981 |
| M861T486_2 | 861. 4879824 | 485. 784 | 1583244. 082 |
| M861T545_2 | 861. 4886139 | 544. 759 | 2323438. 429 |
| M861T476   | 861. 4883701 | 476. 451 | 3778174. 593 |
| M861T462_3 | 861. 4882663 | 462. 446 | 23856372. 24 |
| M862T464   | 861. 5035587 | 464. 011 | 8285295. 175 |
| M862T563_1 | 861. 6503316 | 562. 946 | 576507. 9457 |
| M862T563_2 | 861. 6678833 | 562. 946 | 631351. 5462 |
| M862T581_1 | 862. 4477809 | 581. 442 | 205042. 9197 |
| M862T563_3 | 862. 4458055 | 562. 946 | 24134973. 41 |
| M862T462_1 | 862. 4542959 | 462. 446 | 410905. 2499 |
| M862T581_2 | 862. 4604599 | 581. 442 | 1519644. 892 |
| M862T651_1 | 862. 4603695 | 650. 74  | 2171931. 868 |
| M862T563_4 | 862. 4667453 | 562. 946 | 291768042. 6 |
| M862T462_2 | 862. 4662626 | 462. 446 | 3515054. 427 |
| M862T545_1 | 862. 4776173 | 544. 759 | 2325377. 188 |
| M862T651_2 | 862. 4843864 | 650. 74  | 4392826. 985 |
| M862T563_5 | 862. 4787542 | 562. 946 | 410866595. 1 |
| M862T462_3 | 862. 4782727 | 462. 446 | 10712990. 25 |
| M862T584_1 | 862. 4785683 | 584. 484 | 5095115. 804 |
| M862T545_2 | 862. 4924261 | 544. 759 | 2047799. 616 |
| M862T563_6 | 862. 4907627 | 562. 946 | 223944787. 4 |
| M862T462_4 | 862. 4962888 | 462. 446 | 8707515. 413 |
| M862T584_2 | 862. 491392  | 584. 484 | 3381900. 891 |
| M863T464   | 862. 5115764 | 464. 011 | 1578953. 71  |
| M863T563_1 | 862. 5117744 | 562. 946 | 12565098. 88 |
| M863T172_1 | 863. 2177654 | 171. 546 | 2192114. 717 |
| M863T107_1 | 863. 234985  | 106. 648 | 4387243. 716 |

|            |              |          |              |
|------------|--------------|----------|--------------|
| M863T188_1 | 863. 2295917 | 188. 174 | 3026339. 104 |
| M863T172_2 | 863. 2298008 | 171. 546 | 9610120. 637 |
| M863T172_3 | 863. 2478404 | 171. 546 | 12641150. 39 |
| M863T107_2 | 863. 2525072 | 106. 648 | 2601689. 677 |
| M863T188_2 | 863. 2536339 | 188. 174 | 2761466. 331 |
| M863T172_4 | 863. 2598668 | 171. 546 | 4355423. 379 |
| M863T187   | 863. 2655647 | 186. 689 | 788064. 6469 |
| M863T580   | 863. 4557693 | 579. 883 | 283172. 8667 |
| M863T563_2 | 863. 4554608 | 562. 946 | 37524230. 99 |
| M863T581   | 863. 4703659 | 581. 442 | 1337562. 907 |
| M863T563_3 | 863. 4704976 | 562. 946 | 141661802. 2 |
| M863T462_1 | 863. 468675  | 462. 446 | 1276872. 255 |
| M863T651_1 | 863. 4760913 | 650. 74  | 2186788. 002 |
| M863T563_4 | 863. 4825278 | 562. 946 | 191645802. 9 |
| M863T462_2 | 863. 482273  | 462. 446 | 5093430. 012 |
| M863T584_1 | 863. 482943  | 584. 484 | 2111847. 301 |
| M863T651_2 | 863. 4881147 | 650. 74  | 1832022. 317 |
| M863T563_5 | 863. 4945573 | 562. 946 | 99938565. 49 |
| M863T584_2 | 863. 4950098 | 584. 484 | 1332790. 677 |
| M864T469   | 863. 5006863 | 468. 69  | 5548548. 529 |
| M864T586   | 863. 5073772 | 586. 044 | 176777. 4847 |
| M864T563_1 | 863. 5072181 | 562. 946 | 17248980. 32 |
| M864T107_1 | 864. 2462094 | 106. 648 | 5417717. 056 |
| M864T172   | 864. 2406983 | 171. 546 | 4114513. 732 |
| M864T294_1 | 864. 2466945 | 294. 152 | 5218553. 415 |
| M864T209   | 864. 2500835 | 209. 472 | 8827842. 249 |
| M864T184_1 | 864. 2531939 | 183. 708 | 25195292. 6  |
| M864T237   | 864. 2530848 | 236. 518 | 4162754. 895 |
| M864T294_2 | 864. 2587439 | 294. 152 | 13402664. 56 |
| M864T166   | 864. 2750712 | 165. 522 | 3239769. 698 |
| M864T184_2 | 864. 2712039 | 183. 708 | 23174899. 32 |
| M864T212_1 | 864. 2711487 | 212. 366 | 11413205. 19 |
| M864T107_2 | 864. 2736175 | 106. 648 | 9403881. 186 |
| M864T197_1 | 864. 2711545 | 197. 335 | 6347704. 194 |
| M864T294_3 | 864. 2768184 | 294. 152 | 8909428. 202 |
| M864T235_1 | 864. 2711983 | 234. 972 | 5346080. 951 |
| M864T212_2 | 864. 2843693 | 212. 366 | 3888998. 191 |
| M864T197_2 | 864. 2857732 | 197. 335 | 2148392. 627 |
| M864T185   | 864. 2889189 | 185. 252 | 8291809. 94  |
| M864T235_2 | 864. 284374  | 234. 972 | 1852846. 416 |
| M864T563_2 | 864. 4546133 | 562. 946 | 6170219. 059 |
| M864T458   | 864. 4707135 | 457. 763 | 567436. 852  |
| M864T563_3 | 864. 4817284 | 562. 946 | 58559449. 99 |
| M864T563_4 | 864. 4998068 | 562. 946 | 22690418. 8  |
| M865T293_1 | 864. 7421411 | 292. 621 | 1192102. 866 |
| M865T185_1 | 864. 741837  | 185. 252 | 6350016. 653 |
| M865T214_1 | 864. 7447867 | 213. 897 | 1530156. 156 |
| M865T293_2 | 864. 7577197 | 292. 621 | 8734288. 863 |
| M865T107_1 | 864. 7532072 | 106. 648 | 5231127. 373 |
| M865T184_1 | 864. 7589073 | 183. 708 | 16910938. 48 |
| M865T234_1 | 864. 7594922 | 233. 519 | 3633650. 15  |
| M865T197_1 | 864. 7591078 | 197. 335 | 3936093. 827 |
| M865T172_1 | 864. 7585699 | 171. 546 | 3022641. 38  |
| M865T214_2 | 864. 7592041 | 213. 897 | 4376705. 08  |



|            |              |          |              |
|------------|--------------|----------|--------------|
| M865T293_3 | 864. 7710208 | 292. 621 | 9296605. 459 |
| M865T184_2 | 864. 7769865 | 183. 708 | 13311011. 62 |
| M865T107_2 | 864. 7772943 | 106. 648 | 5838491. 718 |
| M865T234_2 | 864. 7775401 | 233. 519 | 2812885. 621 |
| M865T197_2 | 864. 7771959 | 197. 335 | 3095524. 094 |
| M865T172_2 | 864. 7768534 | 171. 546 | 2407924. 727 |
| M865T214_3 | 864. 7772629 | 213. 897 | 3305125. 412 |
| M865T293_4 | 864. 7891111 | 292. 621 | 1602328. 328 |
| M865T173   | 865. 2225352 | 173. 092 | 2312055. 349 |
| M865T184_3 | 865. 2505665 | 183. 708 | 3810022. 006 |
| M865T212_1 | 865. 2511778 | 212. 366 | 2132801. 928 |
| M865T293_5 | 865. 2478395 | 292. 621 | 1390563. 484 |
| M865T197_3 | 865. 2507086 | 197. 335 | 1223878. 097 |
| M865T235_1 | 865. 2509528 | 234. 972 | 932942. 2221 |
| M865T293_6 | 865. 2599022 | 292. 621 | 4289930. 536 |
| M865T107_3 | 865. 2651443 | 106. 648 | 2721420. 375 |
| M865T212_2 | 865. 2717492 | 212. 366 | 3890426. 909 |
| M865T185_2 | 865. 2729082 | 185. 252 | 9869424. 66  |
| M865T235_2 | 865. 2723504 | 234. 972 | 1545848. 415 |
| M865T293_7 | 865. 2780016 | 292. 621 | 3565753. 395 |
| M865T107_4 | 865. 2790791 | 106. 648 | 2010143. 589 |
| M865T212_3 | 865. 2838256 | 212. 366 | 1600548. 223 |
| M865T563_1 | 865. 4721061 | 562. 946 | 6313423. 854 |
| M865T563_2 | 865. 4962529 | 562. 946 | 9963849. 349 |
| M866T293_1 | 865. 7541343 | 292. 621 | 947712. 9097 |
| M866T214   | 865. 754993  | 213. 897 | 983840. 5377 |
| M866T184_1 | 865. 7605136 | 183. 708 | 2490463. 255 |
| M866T107_1 | 865. 7607892 | 106. 648 | 1235559. 143 |
| M866T107_2 | 865. 7738083 | 106. 648 | 1532038. 802 |
| M866T184_2 | 865. 7786322 | 183. 708 | 2287928. 618 |
| M866T293_2 | 865. 7782751 | 292. 621 | 1313998. 907 |
| M866T172_1 | 866. 2340286 | 171. 546 | 1261642. 314 |
| M866T172_2 | 866. 2575324 | 171. 546 | 675961. 2119 |
| M866T563_1 | 866. 4741737 | 562. 946 | 1165777. 007 |
| M866T563_2 | 866. 4974949 | 562. 946 | 1381839. 18  |
| M867T185_1 | 867. 229341  | 185. 252 | 550636. 8659 |
| M867T99    | 867. 2543024 | 98. 9649 | 2691085. 242 |
| M867T173   | 867. 2543429 | 173. 092 | 648232. 9542 |
| M867T185_2 | 867. 2535642 | 185. 252 | 740270. 3213 |
| M868T481_1 | 868. 4066117 | 481. 089 | 632988. 7525 |
| M868T481_2 | 868. 430811  | 481. 089 | 581529. 698  |
| M869T481   | 869. 4340415 | 481. 089 | 231739. 5452 |
| M869T764_1 | 869. 4369162 | 764. 034 | 701431. 1997 |
| M869T764_2 | 869. 4585445 | 764. 034 | 841229. 6432 |
| M869T730   | 869. 4699794 | 730. 264 | 1074906. 718 |
| M871T727   | 871. 4851743 | 727. 22  | 564769. 8756 |
| M872T411_1 | 871. 9040523 | 411. 444 | 755266. 3871 |
| M872T411_2 | 871. 9241627 | 411. 444 | 1671393. 034 |
| M872T411_3 | 871. 941556  | 411. 444 | 343602. 4624 |
| M872T194   | 872. 242374  | 194. 243 | 766459. 6335 |
| M872T196   | 872. 2606808 | 195. 791 | 616694. 8109 |
| M872T296   | 872. 2673703 | 295. 704 | 210841. 0533 |
| M872T411_4 | 872. 4039703 | 411. 444 | 272413. 3012 |
| M872T411_5 | 872. 4253014 | 411. 444 | 843738. 542  |

|            |              |          |              |
|------------|--------------|----------|--------------|
| M872T411_6 | 872. 4379407 | 411. 444 | 328240. 1185 |
| M873T411_1 | 872. 9141952 | 411. 444 | 158093. 5702 |
| M873T411_2 | 872. 9325915 | 411. 444 | 167421. 9651 |
| M873T188_1 | 873. 2363184 | 188. 174 | 5048262. 261 |
| M873T172_1 | 873. 2356175 | 171. 546 | 15909176. 52 |
| M873T208   | 873. 2416194 | 207. 935 | 373147. 7573 |
| M873T107_1 | 873. 2504652 | 106. 648 | 65784042. 14 |
| M873T188_2 | 873. 2507775 | 188. 174 | 38647699. 63 |
| M873T172_2 | 873. 2508505 | 171. 546 | 112348646. 4 |
| M873T146_1 | 873. 250974  | 146. 08  | 9333617. 179 |
| M873T296   | 873. 2614661 | 295. 704 | 398869. 4928 |
| M873T107_2 | 873. 2749402 | 106. 648 | 194326111. 1 |
| M873T188_3 | 873. 2752482 | 188. 174 | 110631603. 9 |
| M873T172_3 | 873. 2753214 | 171. 546 | 318545951. 6 |
| M873T146_2 | 873. 2752467 | 146. 08  | 24959290. 43 |
| M873T107_3 | 873. 2902376 | 106. 648 | 75620663. 44 |
| M873T188_4 | 873. 2893483 | 188. 174 | 42137754. 4  |
| M873T172_4 | 873. 2890726 | 171. 546 | 120378035. 5 |
| M873T146_3 | 873. 288335  | 146. 08  | 9323595. 604 |
| M873T157   | 873. 2944094 | 156. 582 | 1600117. 327 |
| M873T131   | 873. 2939915 | 131. 207 | 564350. 0958 |
| M873T188_5 | 873. 3027763 | 188. 174 | 5483444. 223 |
| M873T172_5 | 873. 3059227 | 171. 546 | 16028869. 85 |
| M873T603   | 873. 4709007 | 603. 04  | 811453. 1833 |
| M874T188_1 | 874. 2446568 | 188. 174 | 3410162. 069 |
| M874T173   | 874. 2441555 | 173. 092 | 8370005. 307 |
| M874T107_1 | 874. 2502501 | 106. 648 | 15865218. 89 |
| M874T107_2 | 874. 2673231 | 106. 648 | 70222682. 24 |
| M874T188_2 | 874. 2614223 | 188. 174 | 28271701. 81 |
| M874T172_1 | 874. 2614669 | 171. 546 | 81769448. 62 |
| M874T146_1 | 874. 261374  | 146. 08  | 6279460. 071 |
| M874T188_3 | 874. 2798072 | 188. 174 | 37716316. 53 |
| M874T172_2 | 874. 2798521 | 171. 546 | 107640148. 6 |
| M874T146_2 | 874. 279754  | 146. 08  | 8308647. 115 |
| M874T107_3 | 874. 285708  | 106. 648 | 46092529. 69 |
| M874T107_4 | 874. 2997457 | 106. 648 | 7669651. 274 |
| M874T188_4 | 874. 3070092 | 188. 174 | 1490943. 169 |
| M874T172_3 | 874. 3065295 | 171. 546 | 4208724. 359 |
| M875T294_1 | 875. 242554  | 294. 152 | 466839. 5355 |
| M875T172_1 | 875. 2436789 | 171. 546 | 1317125. 289 |
| M875T294_2 | 875. 2548389 | 294. 152 | 943205. 8294 |
| M875T107_1 | 875. 2612587 | 106. 648 | 12263301. 95 |
| M875T172_2 | 875. 2583304 | 171. 546 | 23727220. 14 |
| M875T294_3 | 875. 2671197 | 294. 152 | 714102. 9826 |
| M875T188   | 875. 2802693 | 188. 174 | 12886862. 73 |
| M875T172_3 | 875. 2736784 | 171. 546 | 42142299. 81 |
| M875T107_2 | 875. 2858139 | 106. 648 | 16552375. 33 |
| M875T172_4 | 875. 2859572 | 171. 546 | 29565520. 14 |
| M875T172_5 | 875. 2982352 | 171. 546 | 7138082. 059 |
| M875T439_1 | 875. 4506076 | 439. 27  | 553733. 7637 |
| M875T439_2 | 875. 4689477 | 439. 27  | 642024. 3341 |
| M876T172_1 | 876. 2468452 | 171. 546 | 599683. 7154 |
| M876T107_1 | 876. 2697647 | 106. 648 | 3802146. 613 |
| M876T172_2 | 876. 2648561 | 171. 546 | 4604236. 147 |

|            |              |          |              |
|------------|--------------|----------|--------------|
| M876T172_3 | 876. 2832929 | 171. 546 | 8539997. 594 |
| M876T107_2 | 876. 2881373 | 106. 648 | 3919568. 682 |
| M877T173_1 | 876. 7427054 | 173. 092 | 691803. 5478 |
| M877T172_1 | 876. 7611741 | 171. 546 | 528052. 2248 |
| M877T173_2 | 877. 2722671 | 173. 092 | 1269470. 868 |
| M877T172_2 | 877. 2931346 | 171. 546 | 1225948. 184 |
| M877T514   | 877. 3652154 | 513. 768 | 1116862. 1   |
| M877T523_1 | 877. 3651172 | 523. 055 | 872498. 6731 |
| M877T523_2 | 877. 3773811 | 523. 055 | 365812. 8382 |
| M877T427_1 | 877. 4636139 | 426. 913 | 1189121. 052 |
| M877T427_2 | 877. 4759474 | 426. 913 | 1942717. 885 |
| M877T455   | 877. 4876867 | 454. 645 | 1442554. 668 |
| M877T427_3 | 877. 4944442 | 426. 913 | 700489. 5822 |
| M878T514_1 | 877. 851987  | 513. 768 | 1008869. 827 |
| M878T525_1 | 877. 8510014 | 524. 56  | 512532. 1052 |
| M878T514_2 | 877. 8704829 | 513. 768 | 1016771. 04  |
| M878T525_2 | 877. 8695332 | 524. 56  | 545266. 0148 |
| M878T462_1 | 878. 4564292 | 462. 446 | 832379. 3359 |
| M878T462_2 | 878. 4687595 | 462. 446 | 1920719. 072 |
| M878T462_3 | 878. 4872262 | 462. 446 | 1010394. 353 |
| M879T526   | 879. 4187553 | 526. 124 | 91358. 95253 |
| M879T427_1 | 879. 4700046 | 426. 913 | 5968218. 485 |
| M879T427_2 | 879. 4947406 | 426. 913 | 31143931. 66 |
| M882T464_1 | 882. 3835315 | 464. 011 | 285180. 1534 |
| M882T464_2 | 882. 4083875 | 464. 011 | 576773. 3225 |
| M883T466_1 | 883. 391335  | 465. 575 | 153340. 6001 |
| M883T466_2 | 883. 4037874 | 465. 575 | 235909. 2149 |
| M883T669   | 883. 4478907 | 669. 12  | 1468190. 397 |
| M884T182_1 | 883. 7958815 | 182. 156 | 582030. 1449 |
| M884T182_2 | 883. 814573  | 182. 156 | 615123. 9834 |
| M884T669   | 884. 4856685 | 669. 12  | 369510. 8077 |
| M885T727_1 | 885. 4370288 | 727. 22  | 130807. 7924 |
| M885T727_2 | 885. 4552262 | 727. 22  | 115194. 9543 |
| M885T520_1 | 885. 4559264 | 519. 998 | 14280096. 29 |
| M885T543   | 885. 4578207 | 543. 216 | 153596. 4323 |
| M885T534_1 | 885. 4560358 | 533. 931 | 760816. 8655 |
| M885T534_2 | 885. 4804738 | 533. 931 | 6974766. 62  |
| M885T520_2 | 885. 4809091 | 519. 998 | 122316920    |
| M885T520_3 | 885. 4996491 | 519. 998 | 45883126. 13 |
| M885T534_3 | 885. 4992179 | 533. 931 | 2677471. 288 |
| M886T520_1 | 885. 5152297 | 519. 998 | 6291819      |
| M886T589   | 885. 5142123 | 589. 157 | 150121. 9613 |
| M886T835   | 885. 5310913 | 835. 329 | 1431747. 103 |
| M886T787   | 885. 5370052 | 787. 078 | 730548. 0986 |
| M886T802   | 885. 537753  | 802. 116 | 1946404. 263 |
| M886T829_1 | 885. 5437869 | 829. 321 | 7613075. 965 |
| M886T799   | 885. 5553368 | 799. 306 | 1887861. 665 |
| M886T829_2 | 885. 5562829 | 829. 321 | 6667750. 85  |
| M886T520_2 | 886. 0064213 | 519. 998 | 633331. 541  |
| M886T520_3 | 886. 4690162 | 519. 998 | 26219431. 72 |
| M886T534_1 | 886. 4690191 | 533. 931 | 1352531. 984 |
| M886T520_4 | 886. 4940447 | 519. 998 | 49096439. 17 |
| M886T534_2 | 886. 4937651 | 533. 931 | 2721277. 15  |
| M887T520_1 | 886. 5065579 | 519. 998 | 14657180. 85 |

|            |              |          |              |
|------------|--------------|----------|--------------|
| M887T534_1 | 886. 5143251 | 533. 931 | 252163. 8462 |
| M887T835_1 | 886. 5376287 | 835. 329 | 1323759. 071 |
| M887T835_2 | 886. 5557267 | 835. 329 | 1913834. 895 |
| M887T520_2 | 887. 4752572 | 519. 998 | 15939038. 85 |
| M887T534_2 | 887. 4751207 | 533. 931 | 1371519. 379 |
| M887T608_1 | 887. 4773287 | 607. 625 | 3287336. 716 |
| M887T520_3 | 887. 4964397 | 519. 998 | 45801907. 27 |
| M887T608_2 | 887. 4898653 | 607. 625 | 10067967. 47 |
| M887T534_3 | 887. 4964336 | 533. 931 | 4241940. 963 |
| M888T608   | 887. 5086717 | 607. 625 | 8281146. 873 |
| M888T520_1 | 887. 5152466 | 519. 998 | 12159089. 72 |
| M888T534_1 | 887. 5152378 | 533. 931 | 1332751. 229 |
| M888T520_2 | 888. 4818966 | 519. 998 | 7128921. 375 |
| M888T534_2 | 888. 48087   | 533. 931 | 554252. 7543 |
| M889T520   | 888. 5070017 | 519. 998 | 15717949. 2  |
| M889T534_1 | 888. 5063857 | 533. 931 | 1597200. 322 |
| M889T534_2 | 888. 5188686 | 533. 931 | 594774. 3514 |
| M889T563_1 | 889. 4742547 | 562. 946 | 3472478. 002 |
| M889T563_2 | 889. 4994109 | 562. 946 | 6874678. 135 |
| M890T563_1 | 889. 5245735 | 562. 946 | 8103696. 906 |
| M890T172_1 | 890. 241894  | 171. 546 | 7109035. 236 |
| M890T188_1 | 890. 2476095 | 188. 174 | 3794442. 585 |
| M890T188_2 | 890. 2727654 | 188. 174 | 3433279. 534 |
| M890T172_2 | 890. 2670813 | 171. 546 | 16033386. 47 |
| M890T296_1 | 890. 2723465 | 295. 704 | 1110633. 364 |
| M890T172_3 | 890. 2859677 | 171. 546 | 2044285. 863 |
| M890T296_2 | 890. 2913176 | 295. 704 | 861808. 9242 |
| M890T563_2 | 890. 4815234 | 562. 946 | 1623501. 758 |
| M891T563_1 | 890. 5064315 | 562. 946 | 4135454. 996 |
| M891T563_2 | 890. 5316145 | 562. 946 | 2417895. 395 |
| M891T296_1 | 890. 7712397 | 295. 704 | 768310. 0527 |
| M891T296_2 | 890. 790037  | 295. 704 | 849446. 3595 |
| M891T172_1 | 891. 2505402 | 171. 546 | 3845238. 557 |
| M891T100_1 | 891. 2633591 | 100. 283 | 32121926. 94 |
| M891T172_2 | 891. 2757635 | 171. 546 | 3711099. 955 |
| M891T100_2 | 891. 2885781 | 100. 283 | 60740532. 31 |
| M892T172_1 | 892. 255779  | 171. 546 | 1596632. 354 |
| M892T99    | 892. 2731182 | 98. 9649 | 22256949. 1  |
| M892T172_2 | 892. 2809848 | 171. 546 | 1160677. 562 |
| M892T100   | 892. 2940016 | 100. 283 | 21741983. 39 |
| M893T100_1 | 893. 2791679 | 100. 283 | 7817970. 878 |
| M893T100_2 | 893. 2981636 | 100. 283 | 5994871. 688 |
| M895T172_1 | 895. 2285075 | 171. 546 | 1160886. 553 |
| M895T172_2 | 895. 2523506 | 171. 546 | 4695638. 69  |
| M895T172_3 | 895. 2682459 | 171. 546 | 1156900. 498 |
| M896T172   | 896. 2676768 | 171. 546 | 647180. 5545 |
| M897T563   | 897. 4654868 | 562. 946 | 1802038. 894 |
| M897T681   | 897. 4913955 | 681. 406 | 1624505. 87  |
| M898T681_1 | 898. 4647994 | 681. 406 | 382583. 0635 |
| M898T681_2 | 898. 4803756 | 681. 406 | 1234619. 065 |
| M898T681_3 | 898. 4994901 | 681. 406 | 535962. 3578 |
| M899T294_1 | 899. 2589339 | 294. 152 | 5091004. 937 |
| M899T208_1 | 899. 272487  | 207. 935 | 10446863. 48 |
| M899T221   | 899. 2684769 | 221. 453 | 4156291. 262 |

|            |             |         |             |
|------------|-------------|---------|-------------|
| M899T107_1 | 899.2690323 | 106.648 | 12509109.88 |
| M899T176_1 | 899.2722073 | 176.104 | 14353002.67 |
| M899T131   | 899.2697409 | 131.207 | 2012191.35  |
| M899T241   | 899.2688827 | 240.733 | 2276748.964 |
| M899T190_1 | 899.2721526 | 189.717 | 10220533.02 |
| M899T294_2 | 899.2717184 | 294.152 | 24361423.54 |
| M899T208_2 | 899.2852256 | 207.935 | 17395489.98 |
| M899T176_2 | 899.2849919 | 176.104 | 22960296.97 |
| M899T294_3 | 899.2845043 | 294.152 | 39455403.02 |
| M899T190_2 | 899.2849257 | 189.717 | 16374075.75 |
| M899T107_2 | 899.2908136 | 106.648 | 18794242.98 |
| M899T176_3 | 899.2977769 | 176.104 | 14119367.32 |
| M899T294_4 | 899.2972911 | 294.152 | 24576860.27 |
| M899T191_1 | 899.2976035 | 191.259 | 10926353.95 |
| M899T208_3 | 899.3097008 | 207.935 | 5520691.679 |
| M899T107_3 | 899.3065877 | 106.648 | 7099856.762 |
| M899T176_4 | 899.3105377 | 176.104 | 7547119.425 |
| M899T246   | 899.3131657 | 246.013 | 1565499.9   |
| M899T294_5 | 899.3100789 | 294.152 | 13383907.88 |
| M899T191_2 | 899.3136175 | 191.259 | 5384960.614 |
| M899T296   | 899.3243162 | 295.704 | 460970.2367 |
| M900T107_1 | 899.7718348 | 106.648 | 7954579.598 |
| M900T249_1 | 899.7769685 | 248.622 | 1275215.772 |
| M900T208_1 | 899.7776981 | 207.935 | 9491428.017 |
| M900T221   | 899.7773554 | 221.453 | 4084810.167 |
| M900T175_1 | 899.7773927 | 174.576 | 13831874.55 |
| M900T294_1 | 899.7772249 | 294.152 | 22293024.89 |
| M900T191_1 | 899.7772538 | 191.259 | 9968500.694 |
| M900T249_2 | 899.7961188 | 248.622 | 1298457.135 |
| M900T208_2 | 899.7968934 | 207.935 | 9173391.517 |
| M900T223_1 | 899.7965302 | 222.943 | 3749341.233 |
| M900T107_2 | 899.797113  | 106.648 | 11113508.48 |
| M900T241_1 | 899.7960303 | 240.733 | 2913552.857 |
| M900T175_2 | 899.7965551 | 174.576 | 12846978.76 |
| M900T294_2 | 899.7964196 | 294.152 | 21226743.28 |
| M900T191_2 | 899.7964023 | 191.259 | 9450840.167 |
| M900T266   | 899.8073188 | 265.541 | 166494.5012 |
| M900T270   | 899.8065217 | 269.798 | 273322.5175 |
| M900T260   | 899.8068275 | 259.983 | 441549.3292 |
| M900T249_3 | 899.8102423 | 248.622 | 540935.7643 |
| M900T208_3 | 899.8096803 | 207.935 | 4957712.618 |
| M900T276   | 899.8074391 | 276.104 | 338372.1934 |
| M900T223_2 | 899.8097698 | 222.943 | 2296877.142 |
| M900T241_2 | 899.8099197 | 240.733 | 1296748.268 |
| M900T175_3 | 899.811808  | 174.576 | 7078176.801 |
| M900T294_3 | 899.809197  | 294.152 | 12767772.94 |
| M900T191_3 | 899.8111951 | 191.259 | 5140338.829 |
| M900T296   | 900.270031  | 295.704 | 6090871.892 |
| M900T176   | 900.2769419 | 176.104 | 5330521.166 |
| M900T206_1 | 900.2768036 | 206.399 | 3789563.452 |
| M900T190_1 | 900.2767789 | 189.717 | 4258781.968 |
| M900T108   | 900.2771879 | 108.082 | 5563482.984 |
| M900T294_4 | 900.2830881 | 294.152 | 14170358.14 |
| M900T206_2 | 900.2960024 | 206.399 | 4263811.771 |

|            |              |          |              |
|------------|--------------|----------|--------------|
| M900T175_4 | 900. 2959317 | 174. 576 | 7944230. 354 |
| M900T294_5 | 900. 2958867 | 294. 152 | 12629994. 61 |
| M900T190_2 | 900. 2959825 | 189. 717 | 6246292. 677 |
| M900T107_3 | 900. 3028488 | 106. 648 | 4118768. 323 |
| M900T206_3 | 900. 3100851 | 206. 399 | 1334524. 926 |
| M900T175_5 | 900. 3088346 | 174. 576 | 2834826. 213 |
| M900T294_6 | 900. 3145246 | 294. 152 | 1537287. 632 |
| M900T191_4 | 900. 3088578 | 191. 259 | 1970005. 039 |
| M900T669_1 | 900. 4380547 | 669. 12  | 536925. 5929 |
| M900T669_2 | 900. 463574  | 669. 12  | 474426. 143  |
| M901T296_1 | 900. 7702369 | 295. 704 | 1823279. 676 |
| M901T190   | 900. 7751152 | 189. 717 | 4369125. 671 |
| M901T294_1 | 900. 7828098 | 294. 152 | 5137728. 307 |
| M901T176   | 900. 796254  | 176. 104 | 2858216. 97  |
| M901T294_2 | 900. 7975292 | 294. 152 | 5254607. 677 |
| M901T191   | 900. 7966345 | 191. 259 | 2123180. 208 |
| M901T296_2 | 900. 8104464 | 295. 704 | 1101475. 34  |
| M901T206_1 | 901. 2772649 | 206. 399 | 349304. 2637 |
| M901T294_3 | 901. 2836509 | 294. 152 | 1701358. 244 |
| M901T293   | 901. 3040191 | 292. 621 | 1408855. 8   |
| M901T206_2 | 901. 3022727 | 206. 399 | 317303. 5424 |
| M903T601_1 | 903. 4811159 | 601. 473 | 1423298. 947 |
| M903T601_2 | 903. 4939868 | 601. 473 | 1939111. 856 |
| M904T601   | 903. 5068577 | 601. 473 | 1003424. 347 |
| M905T762_1 | 905. 4178589 | 762. 482 | 348237. 2167 |
| M905T762_2 | 905. 4370001 | 762. 482 | 371002. 6028 |
| M908T539   | 908. 4927933 | 538. 619 | 826406. 5343 |
| M909T172_1 | 908. 7856564 | 171. 546 | 828141. 9046 |
| M909T172_2 | 908. 8051406 | 171. 546 | 962098. 1775 |
| M909T537   | 909. 4937892 | 537. 051 | 288703. 5893 |
| M909T456   | 909. 495431  | 456. 2   | 64888. 19919 |
| M910T539   | 909. 5128258 | 538. 619 | 219548. 7385 |
| M911T172_1 | 911. 2012247 | 171. 546 | 1175881. 588 |
| M911T172_2 | 911. 2271027 | 171. 546 | 2263418. 51  |
| M911T681_1 | 911. 389742  | 681. 406 | 200659. 1362 |
| M911T681_2 | 911. 40574   | 681. 406 | 143837. 6442 |
| M912T172_1 | 912. 2073552 | 171. 546 | 398540. 7563 |
| M912T172_2 | 912. 2313927 | 171. 546 | 718866. 6083 |
| M913T99_1  | 913. 2453269 | 98. 9649 | 4274983. 59  |
| M913T99_2  | 913. 2646247 | 98. 9649 | 2656694. 183 |
| M913T215   | 913. 2727671 | 215. 4   | 960496. 6014 |
| M913T231_1 | 913. 2709753 | 230. 507 | 1337310. 145 |
| M913T296_1 | 913. 2713221 | 295. 704 | 1851800. 896 |
| M913T231_2 | 913. 2905998 | 230. 507 | 1658734. 429 |
| M913T296_2 | 913. 297508  | 295. 704 | 1379310. 905 |
| M913T681   | 913. 4421607 | 681. 406 | 200603. 6833 |
| M913T563_1 | 913. 4557661 | 562. 946 | 2359313. 098 |
| M913T563_2 | 913. 4765136 | 562. 946 | 7701638. 701 |
| M914T215   | 913. 7695029 | 215. 4   | 522657. 5174 |
| M914T231_1 | 913. 7697579 | 230. 507 | 760442. 3857 |
| M914T296_1 | 913. 7696007 | 295. 704 | 1225043. 118 |
| M914T231_2 | 913. 7943536 | 230. 507 | 1778853. 183 |
| M914T296_2 | 913. 7955508 | 295. 704 | 1837209. 139 |
| M914T297_1 | 914. 2741521 | 297. 149 | 826920. 9278 |

|            |              |           |              |
|------------|--------------|-----------|--------------|
| M914T209   | 914. 2962277 | 209. 472  | 196275. 5325 |
| M914T297_2 | 914. 2977287 | 297. 149  | 917742. 1716 |
| M914T563_1 | 914. 4631997 | 562. 946  | 1985575. 003 |
| M914T563_2 | 914. 4894324 | 562. 946  | 2359162. 996 |
| M915T640   | 914. 508362  | 640. 057  | 499210. 733  |
| M916T735   | 915. 5444603 | 734. 901  | 451137. 6958 |
| M917T172_1 | 917. 2510892 | 171. 546  | 538556. 8966 |
| M917T296_1 | 917. 2634476 | 295. 704  | 702117. 6132 |
| M917T191   | 917. 26249   | 191. 259  | 636740. 5177 |
| M917T172_2 | 917. 2666836 | 171. 546  | 551747. 1645 |
| M917T190   | 917. 282385  | 189. 717  | 669997. 0682 |
| M917T296_2 | 917. 2831974 | 295. 704  | 1364643. 685 |
| M917T106_1 | 917. 2892634 | 105. 537  | 1450516. 354 |
| M917T172_3 | 917. 2939435 | 171. 546  | 1833101. 949 |
| M917T106_2 | 917. 3079662 | 105. 537  | 945835. 8805 |
| M917T172_4 | 917. 3117152 | 171. 546  | 1148389. 423 |
| M917T762   | 917. 440888  | 762. 482  | 287739. 8553 |
| M918T191_1 | 917. 7701042 | 191. 259  | 881003. 8927 |
| M918T191_2 | 917. 7832885 | 191. 259  | 789016. 2811 |
| M918T175   | 918. 2583884 | 174. 576  | 322091. 3316 |
| M918T190   | 918. 2765454 | 189. 717  | 1077183. 031 |
| M918T291   | 918. 2858369 | 291. 076  | 768717. 6003 |
| M919T408_1 | 919. 4734854 | 408. 368  | 416503. 7747 |
| M919T408_2 | 919. 4999187 | 408. 368  | 466763. 8409 |
| M920T408   | 920. 4793046 | 408. 368  | 188534. 5233 |
| M921T408   | 920. 5048713 | 408. 368  | 152919. 4794 |
| M921T501_1 | 921. 400845  | 501. 318  | 383161. 1515 |
| M921T501_2 | 921. 4252332 | 501. 318  | 249364. 7563 |
| M922T271   | 922. 2580292 | 271. 2845 | 154005. 6776 |
| M922T264   | 922. 2590416 | 264. 434  | 175572. 0804 |
| M922T208_1 | 922. 2576906 | 207. 935  | 5610294. 777 |
| M922T246_1 | 922. 2581053 | 246. 013  | 2265417. 981 |
| M922T294_1 | 922. 2578634 | 294. 152  | 12467548. 13 |
| M922T190_1 | 922. 2600885 | 189. 717  | 9129976. 794 |
| M922T176_1 | 922. 2636303 | 176. 104  | 4611513. 231 |
| M922T107_1 | 922. 2696035 | 106. 648  | 14557593. 94 |
| M922T208_2 | 922. 2767134 | 207. 935  | 21608816. 37 |
| M922T176_2 | 922. 2769051 | 176. 104  | 17715620. 71 |
| M922T294_2 | 922. 2766132 | 294. 152  | 48320626. 47 |
| M922T190_2 | 922. 2767397 | 189. 717  | 35235877. 96 |
| M922T208_3 | 922. 2966285 | 207. 935  | 23599502. 99 |
| M922T221   | 922. 2966805 | 221. 453  | 8316886. 303 |
| M922T107_2 | 922. 2961463 | 106. 648  | 29823180. 66 |
| M922T175_1 | 922. 2968294 | 174. 576  | 20093113. 69 |
| M922T294_3 | 922. 2965372 | 294. 152  | 55948521. 86 |
| M922T190_3 | 922. 2966587 | 189. 717  | 40652132. 28 |
| M922T107_3 | 922. 3094164 | 106. 648  | 9356553. 567 |
| M922T246_2 | 922. 3088713 | 246. 474  | 1657140. 292 |
| M922T175_2 | 922. 3122912 | 174. 576  | 6131090. 892 |
| M922T294_4 | 922. 3098198 | 294. 152  | 18345104. 63 |
| M922T202   | 922. 3156452 | 201. 897  | 4885161. 983 |
| M922T190_4 | 922. 3163922 | 189. 717  | 12846308. 13 |
| M923T294_1 | 922. 7613634 | 294. 152  | 5404216. 268 |
| M923T272   | 922. 7640867 | 272. 312  | 253446. 2027 |

|            |              |          |              |
|------------|--------------|----------|--------------|
| M923T267_1 | 922. 7636902 | 267. 169 | 196724. 5928 |
| M923T279   | 922. 7632367 | 278. 627 | 643581. 3494 |
| M923T249   | 922. 7638764 | 248. 622 | 783349. 1075 |
| M923T258   | 922. 7634788 | 258. 208 | 185261. 2248 |
| M923T237   | 922. 7640875 | 236. 518 | 1021370. 779 |
| M923T243   | 922. 7747309 | 243. 386 | 1849180. 482 |
| M923T209_1 | 922. 7747306 | 209. 472 | 7684652. 59  |
| M923T202_1 | 922. 774831  | 201. 897 | 7221628. 531 |
| M923T221_1 | 922. 7749173 | 221. 453 | 4865126. 397 |
| M923T175_1 | 922. 7750093 | 174. 576 | 10286105. 67 |
| M923T294_2 | 922. 7746534 | 294. 152 | 28535492. 55 |
| M923T190_1 | 922. 774884  | 189. 717 | 19355807. 01 |
| M923T108_1 | 922. 7746364 | 108. 082 | 14875727. 85 |
| M923T242   | 922. 8012845 | 242. 223 | 4409330. 225 |
| M923T246   | 922. 8078108 | 246. 474 | 1110360. 302 |
| M923T209_2 | 922. 8013113 | 209. 472 | 9053494. 801 |
| M923T202_2 | 922. 8014058 | 201. 897 | 9112415. 86  |
| M923T221_2 | 922. 8015051 | 221. 453 | 6100858. 083 |
| M923T175_2 | 922. 8015942 | 174. 576 | 12741752. 83 |
| M923T294_3 | 922. 801239  | 294. 152 | 35888721. 85 |
| M923T190_2 | 922. 8014652 | 189. 717 | 23841510. 93 |
| M923T108_2 | 922. 8012307 | 108. 082 | 18363792. 44 |
| M923T294_4 | 922. 8145312 | 294. 152 | 8988609. 15  |
| M923T190_3 | 922. 8147556 | 189. 717 | 6495599. 561 |
| M923T271   | 923. 2606265 | 270. 88  | 73444. 48834 |
| M923T267_2 | 923. 2622645 | 266. 709 | 74403. 6305  |
| M923T245_1 | 923. 2605193 | 244. 891 | 226719. 4793 |
| M923T240   | 923. 260644  | 239. 574 | 439397. 5784 |
| M923T277   | 923. 2622747 | 276. 825 | 126195. 3596 |
| M923T208_1 | 923. 2608405 | 207. 935 | 1582053. 301 |
| M923T255   | 923. 2625273 | 254. 651 | 91796. 94699 |
| M923T220   | 923. 2624068 | 219. 979 | 1191291. 509 |
| M923T294_5 | 923. 2669094 | 294. 152 | 12267512. 21 |
| M923T190_4 | 923. 2702595 | 189. 717 | 8116640. 655 |
| M923T107_1 | 923. 2804326 | 106. 648 | 10399679. 01 |
| M923T245_2 | 923. 2804577 | 244. 891 | 1098640. 727 |
| M923T175_3 | 923. 2738077 | 174. 576 | 4369758. 153 |
| M923T209_3 | 923. 2806195 | 209. 472 | 7965516. 329 |
| M923T130_1 | 923. 280722  | 129. 827 | 3301766. 124 |
| M923T294_6 | 923. 2868651 | 294. 152 | 26927162. 52 |
| M923T190_5 | 923. 2868822 | 189. 717 | 17966896. 96 |
| M923T175_4 | 923. 2871024 | 174. 576 | 9531741. 321 |
| M923T208_2 | 923. 3007469 | 207. 935 | 5053027. 289 |
| M923T221_3 | 923. 3002057 | 221. 453 | 4120159. 81  |
| M923T175_5 | 923. 3003989 | 174. 576 | 7849289. 688 |
| M923T294_7 | 923. 3001697 | 294. 152 | 22650342. 43 |
| M923T190_6 | 923. 3001816 | 189. 717 | 15147499. 37 |
| M923T107_2 | 923. 3070315 | 106. 648 | 6863234. 883 |
| M923T130_2 | 923. 3072474 | 129. 827 | 2115957. 498 |
| M923T291   | 923. 3168406 | 291. 076 | 3889785. 227 |
| M923T190_7 | 923. 3131911 | 189. 717 | 9259458. 484 |
| M924T208_1 | 923. 7708819 | 207. 935 | 1506467. 891 |
| M924T176   | 923. 773162  | 176. 104 | 1349792. 833 |
| M924T190_1 | 923. 7702487 | 189. 717 | 2624551. 961 |



|            |              |          |              |
|------------|--------------|----------|--------------|
| M924T107_1 | 923. 778957  | 106. 648 | 3442326. 122 |
| M924T294_1 | 923. 7793038 | 294. 152 | 5975973. 489 |
| M924T208_2 | 923. 7859532 | 207. 935 | 2472977. 994 |
| M924T221   | 923. 786495  | 221. 453 | 1830117. 688 |
| M924T175_1 | 923. 7866226 | 174. 576 | 3556082. 956 |
| M924T190_2 | 923. 7864191 | 189. 717 | 6925278. 111 |
| M924T294_2 | 923. 799258  | 294. 152 | 8654282. 934 |
| M924T208_3 | 923. 8055712 | 207. 935 | 2873471. 699 |
| M924T107_2 | 923. 8055969 | 106. 648 | 3574128. 642 |
| M924T175_2 | 923. 8060925 | 174. 576 | 2427716. 216 |
| M924T190_3 | 923. 8063939 | 189. 717 | 4652279. 271 |
| M924T294_3 | 923. 8125582 | 294. 152 | 2917163. 752 |
| M924T191_1 | 924. 2774259 | 191. 259 | 1524391. 446 |
| M924T294_4 | 924. 2853489 | 294. 152 | 3188203. 118 |
| M924T294_5 | 924. 3053418 | 294. 152 | 2761626. 906 |
| M924T191_2 | 924. 3058014 | 191. 259 | 1721218. 983 |
| M925T293   | 924. 8052948 | 292. 621 | 360888. 7881 |
| M925T172_1 | 925. 226645  | 171. 546 | 1850648. 321 |
| M925T172_2 | 925. 2466736 | 171. 546 | 1668678. 487 |
| M926T172_1 | 926. 220709  | 171. 546 | 433589. 3947 |
| M926T172_2 | 926. 2407625 | 171. 546 | 720748. 6736 |
| M930T697_1 | 929. 532442  | 697. 061 | 275327. 2133 |
| M930T697_2 | 929. 5588847 | 697. 061 | 239257. 7518 |
| M931T291   | 931. 2681464 | 291. 076 | 362268. 5117 |
| M932T290_1 | 931. 7731521 | 289. 534 | 151963. 3475 |
| M932T290_2 | 931. 7866246 | 289. 534 | 216345. 3277 |
| M932T546_1 | 932. 0025774 | 546. 308 | 9305723. 374 |
| M932T546_2 | 932. 0295235 | 546. 308 | 38221948. 61 |
| M932T546_3 | 932. 0552414 | 546. 308 | 2474172. 255 |
| M933T546_1 | 933. 0085488 | 546. 308 | 3365614. 108 |
| M933T546_2 | 933. 0355757 | 546. 308 | 8887046. 212 |
| M933T190   | 933. 2652018 | 189. 717 | 504785. 8364 |
| M933T294_1 | 933. 2720579 | 294. 152 | 1083753. 485 |
| M933T294_2 | 933. 2919057 | 294. 152 | 631520. 0695 |
| M934T612   | 933. 5275543 | 612. 3   | 66243. 26048 |
| M934T546   | 933. 5612897 | 546. 308 | 485323. 9836 |
| M934T545_1 | 934. 0214572 | 544. 759 | 682968. 6852 |
| M934T545_2 | 934. 0415064 | 544. 759 | 567381. 3157 |
| M935T545   | 934. 5139551 | 544. 759 | 809456. 3104 |
| M935T546   | 934. 5371581 | 546. 308 | 1285360. 516 |
| M936T297_1 | 936. 2747893 | 297. 149 | 822408. 9423 |
| M936T231_1 | 936. 2743698 | 230. 507 | 844274. 381  |
| M936T297_2 | 936. 3019159 | 297. 149 | 667833. 4324 |
| M936T231_2 | 936. 3015648 | 230. 507 | 464487. 5916 |
| M936T601_1 | 936. 4715888 | 601. 473 | 466302. 013  |
| M936T601_2 | 936. 4987291 | 601. 473 | 492335. 0486 |
| M937T232_1 | 936. 7697737 | 231. 973 | 259302. 2618 |
| M937T232_2 | 936. 7836112 | 231. 973 | 604720. 2894 |
| M937T232_3 | 936. 7972128 | 231. 973 | 450701. 1826 |
| M937T78_1  | 937. 1922711 | 78. 2661 | 2829980. 045 |
| M937T78_2  | 937. 2056604 | 78. 2661 | 2227286. 199 |
| M941T188   | 941. 2422503 | 188. 174 | 1453332. 893 |
| M941T173_1 | 941. 2449743 | 173. 092 | 2370256. 126 |
| M941T190_1 | 941. 2578583 | 189. 717 | 2521686. 234 |

|            |              |          |              |
|------------|--------------|----------|--------------|
| M941T173_2 | 941. 2693211 | 173. 092 | 2002415. 825 |
| M941T190_2 | 941. 2779927 | 189. 717 | 936578. 773  |
| M941T302_1 | 941. 2867507 | 301. 725 | 299126. 4843 |
| M941T302_2 | 941. 3067833 | 301. 725 | 210267. 3009 |
| M942T193_1 | 941. 7593192 | 192. 769 | 711358. 385  |
| M942T193_2 | 941. 779282  | 192. 769 | 448474. 4002 |
| M942T173   | 942. 274346  | 173. 092 | 664079. 2964 |
| M942T106_1 | 942. 3143443 | 105. 537 | 3191790. 972 |
| M942T106_2 | 942. 3418089 | 105. 537 | 2526809. 562 |
| M943T588   | 943. 4405586 | 587. 595 | 298660. 1184 |
| M945T221_1 | 945. 2712989 | 221. 453 | 930425. 2731 |
| M945T107_1 | 945. 2765758 | 106. 648 | 3988132. 834 |
| M945T176_1 | 945. 2708446 | 176. 104 | 1124512. 707 |
| M945T294_1 | 945. 2706681 | 294. 152 | 2824604. 143 |
| M945T241   | 945. 2715473 | 240. 733 | 485717. 2018 |
| M945T190_1 | 945. 2710704 | 189. 717 | 6340563. 582 |
| M945T221_2 | 945. 2850768 | 221. 453 | 2287136. 899 |
| M945T176_2 | 945. 2846204 | 176. 104 | 2868955. 607 |
| M945T294_2 | 945. 2844513 | 294. 152 | 7007127. 879 |
| M945T190_2 | 945. 2848484 | 189. 717 | 15388737. 33 |
| M945T221_3 | 945. 2988552 | 221. 453 | 2071883. 395 |
| M945T176_3 | 945. 2984012 | 176. 104 | 2624640. 604 |
| M945T190_3 | 945. 2986275 | 189. 717 | 14079623. 81 |
| M945T107_2 | 945. 3041103 | 106. 648 | 3262323. 624 |
| M945T294_3 | 945. 3016791 | 294. 152 | 6628331. 802 |
| M945T242   | 945. 3129232 | 242. 223 | 390801. 1665 |
| M945T190_4 | 945. 3151017 | 189. 717 | 4702042. 996 |
| M946T703_1 | 945. 5183379 | 702. 622 | 32713536. 88 |
| M946T559_1 | 945. 5308642 | 558. 574 | 11009394. 84 |
| M946T703_2 | 945. 545912  | 702. 622 | 83061025. 06 |
| M946T559_2 | 945. 5513351 | 558. 574 | 7077022. 724 |
| M946T209   | 945. 7747893 | 209. 472 | 860410. 0952 |
| M946T190_1 | 945. 7742961 | 189. 717 | 5720977. 973 |
| M946T220_1 | 945. 7747844 | 219. 979 | 803037. 4256 |
| M946T108_1 | 945. 7739071 | 108. 082 | 1308889. 76  |
| M946T294_1 | 945. 780946  | 294. 152 | 2885834. 188 |
| M946T190_2 | 945. 7880842 | 189. 717 | 12255076. 37 |
| M946T220_2 | 945. 7884315 | 219. 979 | 4101592. 891 |
| M946T108_2 | 945. 787777  | 108. 082 | 3000069. 553 |
| M946T294_2 | 945. 801627  | 294. 152 | 4679730. 864 |
| M946T246   | 945. 8085368 | 246. 013 | 790576. 6923 |
| M946T190_3 | 945. 8018748 | 189. 717 | 10021022. 31 |
| M946T220_3 | 945. 8022216 | 219. 979 | 3283702. 875 |
| M946T108_3 | 945. 8084995 | 108. 082 | 1607923. 648 |
| M946T703_3 | 946. 0085967 | 702. 622 | 3555220. 77  |
| M946T291   | 946. 2727084 | 291. 076 | 874513. 6169 |
| M946T190_4 | 946. 2702563 | 189. 717 | 3096015. 762 |
| M946T107_1 | 946. 2841554 | 106. 648 | 2635075. 804 |
| M946T294_3 | 946. 2847662 | 294. 152 | 2798617. 147 |
| M946T107_2 | 946. 304793  | 106. 648 | 2122004. 574 |
| M946T294_4 | 946. 3054803 | 294. 152 | 2379264. 887 |
| M946T190_5 | 946. 2984722 | 189. 717 | 6464863. 494 |
| M946T190_6 | 946. 3166112 | 189. 717 | 2024729. 493 |
| M946T611   | 946. 4625887 | 610. 742 | 263169. 2611 |

|            |              |          |              |
|------------|--------------|----------|--------------|
| M946T609   | 946. 4824802 | 609. 19  | 206570. 9333 |
| M947T190_1 | 946. 7822005 | 189. 717 | 1827882. 231 |
| M947T190_2 | 946. 8098133 | 189. 717 | 1544009. 172 |
| M947T703_1 | 947. 010004  | 702. 622 | 760553. 5073 |
| M947T703_2 | 947. 0238029 | 702. 622 | 5844410. 64  |
| M947T703_3 | 947. 0514394 | 702. 622 | 13951373. 35 |
| M947T191   | 947. 2875115 | 191. 259 | 683244. 0252 |
| M947T190_3 | 947. 3081654 | 189. 717 | 617513. 8245 |
| M947T643   | 947. 4724152 | 643. 166 | 2531608. 383 |
| M947T592_1 | 947. 4733947 | 592. 284 | 1324174. 353 |
| M947T592_2 | 947. 4941319 | 592. 284 | 1202092. 435 |
| M948T703_1 | 948. 0264574 | 702. 622 | 568972. 9473 |
| M948T703_2 | 948. 0697665 | 702. 622 | 171454. 639  |
| M948T642   | 948. 4764464 | 641. 603 | 1186552. 819 |
| M948T592   | 948. 4772793 | 592. 284 | 725200. 3065 |
| M949T601_1 | 949. 4747381 | 601. 473 | 1220723. 704 |
| M949T594_1 | 949. 4751341 | 593. 841 | 727917. 96   |
| M949T601_2 | 949. 4884675 | 601. 473 | 3790684. 506 |
| M949T594_2 | 949. 4889202 | 593. 841 | 2026578. 01  |
| M950T601_1 | 949. 5092865 | 601. 473 | 3114272. 931 |
| M950T594_1 | 949. 5096451 | 593. 841 | 1530993. 717 |
| M950T652   | 949. 5475704 | 652. 285 | 124858. 0683 |
| M950T601_2 | 950. 4821481 | 601. 473 | 924125. 7098 |
| M950T594_2 | 950. 4823171 | 593. 841 | 397056. 8546 |
| M951T601   | 950. 5097881 | 601. 473 | 2016687. 846 |
| M951T594   | 950. 5095383 | 593. 841 | 835074. 345  |
| M951T546_1 | 951. 0095851 | 546. 308 | 196196. 6974 |
| M951T546_2 | 951. 0215196 | 546. 308 | 156569. 3408 |
| M952T735   | 952. 4999645 | 734. 901 | 382251. 8981 |
| M953T735_1 | 952. 5212553 | 734. 901 | 316412. 1838 |
| M953T315_1 | 953. 2947388 | 315. 162 | 606320. 9198 |
| M953T315_2 | 953. 3086971 | 315. 162 | 403393. 065  |
| M953T735_2 | 953. 4900491 | 734. 901 | 168836. 2139 |
| M954T733_1 | 953. 5040094 | 733. 352 | 320845. 4387 |
| M954T733_2 | 953. 5179657 | 733. 352 | 227064. 2024 |
| M954T215   | 953. 958586  | 215. 4   | 269565. 9493 |
| M955T546_1 | 954. 5521193 | 546. 308 | 2475847. 946 |
| M955T546_2 | 955. 0070293 | 546. 308 | 4972004. 419 |
| M955T546_3 | 955. 0349943 | 546. 308 | 13526666. 19 |
| M955T546_4 | 955. 0546697 | 546. 308 | 1985068. 456 |
| M956T545   | 955. 5392907 | 544. 759 | 8064606. 263 |
| M956T546_1 | 955. 5542483 | 546. 308 | 1533165. 158 |
| M956T546_2 | 956. 0223496 | 546. 308 | 3046922. 537 |
| M956T546_3 | 956. 050323  | 546. 308 | 1434918. 51  |
| M956T512   | 956. 4289246 | 512. 228 | 126799. 1583 |
| M957T545   | 956. 5475761 | 544. 759 | 728931. 3426 |
| M957T172_1 | 957. 2081383 | 171. 546 | 2036652. 132 |
| M957T172_2 | 957. 2362096 | 171. 546 | 2332010. 734 |
| M957T592   | 957. 4881244 | 592. 284 | 269492. 9699 |
| M958T592   | 957. 510037  | 592. 284 | 97452. 57517 |
| M958T172_1 | 958. 2134922 | 171. 546 | 664951. 6948 |
| M958T172_2 | 958. 2414957 | 171. 546 | 637277. 5047 |
| M961T735   | 961. 4991002 | 734. 901 | 716846. 035  |
| M962T724_1 | 961. 5135004 | 724. 158 | 801971. 2076 |

|            |              |          |              |
|------------|--------------|----------|--------------|
| M962T735_1 | 961. 5132276 | 734. 901 | 5508166. 401 |
| M962T600   | 961. 5201656 | 599. 904 | 994311. 0221 |
| M962T724_2 | 961. 5417717 | 724. 158 | 2013376. 557 |
| M962T735_2 | 961. 5414961 | 734. 901 | 14268313. 45 |
| M962T537   | 961. 5602506 | 537. 051 | 682712. 6689 |
| M962T735_3 | 961. 5556299 | 734. 901 | 5077736. 034 |
| M963T735_1 | 962. 5108626 | 734. 901 | 1389869. 144 |
| M963T735_2 | 962. 5391814 | 734. 901 | 8209707. 451 |
| M963T735_3 | 962. 5604205 | 734. 901 | 2289875. 139 |
| M964T735   | 963. 5457094 | 734. 901 | 2552903. 715 |
| M965T580   | 965. 4786317 | 579. 883 | 483349. 5273 |
| M965T566   | 965. 4768972 | 566. 042 | 6673829. 861 |
| M966T566_1 | 965. 5053273 | 566. 042 | 7901847. 904 |
| M966T566_2 | 965. 519504  | 566. 042 | 1886816. 631 |
| M966T601   | 966. 4738744 | 601. 473 | 1209651. 109 |
| M966T594   | 966. 4743815 | 593. 841 | 503958. 4532 |
| M966T566_3 | 966. 4737461 | 566. 042 | 1735799. 33  |
| M966T461_1 | 966. 4833581 | 460. 89  | 135860. 4653 |
| M966T566_4 | 966. 4877772 | 566. 042 | 5164151. 604 |
| M966T461_2 | 966. 4958293 | 460. 89  | 281177. 9654 |
| M967T566   | 966. 5157925 | 566. 042 | 2343330. 569 |
| M967T459   | 966. 5100599 | 459. 324 | 204199. 607  |
| M967T151_1 | 967. 3290007 | 150. 528 | 644603. 4    |
| M967T151_2 | 967. 3575161 | 150. 528 | 452859. 903  |
| M967T546   | 967. 4724555 | 546. 308 | 2722253. 023 |
| M968T546_1 | 967. 5008785 | 546. 308 | 18209313. 6  |
| M968T546_2 | 967. 5288226 | 546. 308 | 2262658. 526 |
| M969T546   | 968. 5151098 | 546. 308 | 7705646. 204 |
| M970T520   | 970. 4680607 | 519. 998 | 387657. 4783 |
| M970T546   | 970. 4823222 | 546. 308 | 1319629. 173 |
| M971T299_1 | 971. 2869133 | 298. 619 | 1681047. 175 |
| M971T227_1 | 971. 293906  | 227. 421 | 1668311. 9   |
| M971T214_1 | 971. 29344   | 213. 897 | 917430. 9204 |
| M971T299_2 | 971. 3012371 | 298. 619 | 3883108. 582 |
| M971T108_1 | 971. 3004844 | 108. 082 | 1814072. 951 |
| M971T299_3 | 971. 3155695 | 298. 619 | 3205223. 965 |
| M971T227_2 | 971. 3226204 | 227. 421 | 1200472. 191 |
| M971T214_2 | 971. 3217175 | 213. 897 | 634640. 8041 |
| M971T108_2 | 971. 3220141 | 108. 082 | 1265852. 572 |
| M971T300   | 971. 3300485 | 300. 176 | 857413. 8737 |
| M972T229   | 972. 298343  | 228. 961 | 663448. 0757 |
| M972T300_1 | 972. 2996126 | 300. 176 | 1175792. 345 |
| M972T227   | 972. 3194558 | 227. 421 | 656661. 2475 |
| M972T300_2 | 972. 3211559 | 300. 176 | 1084537. 872 |
| M973T299   | 973. 3063894 | 298. 619 | 450468. 22   |
| M973T300   | 973. 3278946 | 300. 176 | 243725. 5756 |
| M974T503   | 973. 5499007 | 502. 873 | 336501. 8403 |
| M975T704   | 974. 5315508 | 704. 046 | 292545. 9221 |
| M975T706   | 974. 5536415 | 705. 593 | 129977. 1965 |
| M976T759_1 | 975. 5352081 | 759. 428 | 2360207. 164 |
| M976T697_1 | 975. 5352038 | 697. 061 | 4391972. 978 |
| M976T697_2 | 975. 549648  | 697. 061 | 6955473. 231 |
| M976T759_2 | 975. 5570817 | 759. 428 | 3340860. 757 |
| M976T697_3 | 975. 564092  | 697. 061 | 4318217. 158 |

|            |              |          |              |
|------------|--------------|----------|--------------|
| M976T697_4 | 975. 5873999 | 697. 061 | 63656. 58442 |
| M977T697_1 | 976. 5186536 | 697. 061 | 180358. 924  |
| M977T759_1 | 976. 5407145 | 759. 428 | 1405521. 278 |
| M977T759_2 | 976. 5693128 | 759. 428 | 1072086. 613 |
| M977T697_2 | 976. 5817109 | 697. 061 | 361724. 7604 |
| M977T546   | 977. 4962845 | 546. 308 | 39672643. 99 |
| M978T546_1 | 977. 5107535 | 546. 308 | 242640775. 1 |
| M978T546_2 | 977. 5252349 | 546. 308 | 503272277. 3 |
| M978T615_1 | 977. 5397353 | 615. 38  | 1541587. 352 |
| M978T546_3 | 977. 5397189 | 546. 308 | 402582170    |
| M978T615_2 | 977. 5542211 | 615. 38  | 366166. 9784 |
| M978T546_4 | 977. 5541965 | 546. 308 | 111708166. 5 |
| M978T697_1 | 977. 5538056 | 697. 061 | 1365943. 49  |
| M978T697_2 | 977. 5682951 | 697. 061 | 933538. 6005 |
| M978T545_1 | 978. 0177611 | 544. 759 | 3283562. 342 |
| M978T545_2 | 978. 0467648 | 544. 759 | 2623570. 512 |
| M978T546_5 | 978. 4971712 | 546. 308 | 16426987. 78 |
| M979T546_1 | 978. 511669  | 546. 308 | 105501983. 1 |
| M979T546_2 | 978. 5406868 | 546. 308 | 238687031. 1 |
| M979T735   | 978. 540856  | 734. 901 | 657868. 9715 |
| M979T546_3 | 978. 5551934 | 546. 308 | 78991965. 15 |
| M979T545   | 978. 5769366 | 544. 759 | 2885616. 861 |
| M979T546_4 | 979. 4994199 | 546. 308 | 5037931. 798 |
| M980T546_1 | 979. 5284695 | 546. 308 | 86225896. 66 |
| M980T546_2 | 979. 550268  | 546. 308 | 55017846. 82 |
| M980T546_3 | 979. 5719482 | 546. 308 | 3105210. 748 |
| M980T293_1 | 980. 2880277 | 292. 621 | 9656347. 13  |
| M980T196_1 | 980. 2861596 | 195. 791 | 5335947. 419 |
| M980T293_2 | 980. 2989415 | 292. 621 | 16629593. 08 |
| M980T107_1 | 980. 2983235 | 106. 648 | 9681171. 928 |
| M980T196_2 | 980. 2991287 | 195. 791 | 9171324. 865 |
| M980T178   | 980. 2992041 | 177. 649 | 7390655. 178 |
| M980T293_3 | 980. 3221746 | 292. 621 | 18810863. 42 |
| M980T176   | 980. 3221938 | 176. 104 | 11130003. 85 |
| M980T196_3 | 980. 3215277 | 195. 791 | 10276659. 25 |
| M980T107_2 | 980. 3274315 | 106. 648 | 7134503. 15  |
| M980T234   | 980. 3325281 | 233. 519 | 760903. 4519 |
| M980T214   | 980. 3309863 | 213. 897 | 3528327. 843 |
| M980T293_4 | 980. 3353223 | 292. 621 | 5673374. 537 |
| M980T196_4 | 980. 3366087 | 195. 791 | 3075911. 138 |
| M981T293_1 | 980. 790349  | 292. 621 | 8450002. 396 |
| M981T178_1 | 980. 7904295 | 177. 649 | 3587063. 97  |
| M981T196_1 | 980. 7907032 | 195. 791 | 4221976. 262 |
| M981T107_1 | 980. 8017296 | 106. 648 | 7112417. 567 |
| M981T293_2 | 980. 808553  | 292. 621 | 18406934. 61 |
| M981T176_1 | 980. 8088414 | 176. 104 | 10224212. 96 |
| M981T268_1 | 980. 8087492 | 268. 419 | 2398515. 844 |
| M981T246   | 980. 8077405 | 246. 013 | 579193. 0199 |
| M981T217   | 980. 8084648 | 216. 95  | 6593089. 373 |
| M981T196_2 | 980. 8084898 | 195. 791 | 9287899. 629 |
| M981T235_1 | 980. 8083187 | 234. 972 | 1406995. 922 |
| M981T254_1 | 980. 8084769 | 253. 674 | 507110. 8475 |
| M981T248   | 980. 8301259 | 247. 773 | 304667. 1219 |
| M981T254_2 | 980. 8302396 | 253. 674 | 196190. 1956 |

|            |              |          |              |
|------------|--------------|----------|--------------|
| M981T223   | 980. 8306081 | 222. 943 | 1174886. 023 |
| M981T293_3 | 980. 8340387 | 292. 621 | 9403764. 832 |
| M981T107_2 | 980. 8308727 | 106. 648 | 4976039. 92  |
| M981T176_2 | 980. 8339278 | 176. 104 | 4483398. 455 |
| M981T268_2 | 980. 8302109 | 268. 419 | 1060337. 212 |
| M981T214   | 980. 8298    | 213. 897 | 1723034. 184 |
| M981T196_3 | 980. 8303347 | 195. 791 | 4772957. 36  |
| M981T235_2 | 980. 8301111 | 234. 972 | 656543. 6706 |
| M981T293_4 | 981. 290079  | 292. 621 | 2639283. 95  |
| M981T196_4 | 981. 2964873 | 195. 791 | 2656899. 846 |
| M981T178_2 | 981. 2969093 | 177. 649 | 2011195. 197 |
| M981T108_1 | 981. 296757  | 108. 082 | 3265078. 833 |
| M981T293_5 | 981. 3039295 | 292. 621 | 8877972. 454 |
| M981T293_6 | 981. 325793  | 292. 621 | 8192866. 344 |
| M981T196_5 | 981. 3256233 | 195. 791 | 3884643. 735 |
| M981T178_3 | 981. 3260789 | 177. 649 | 2922187. 668 |
| M981T108_2 | 981. 3259284 | 108. 082 | 4801734. 286 |
| M981T293_7 | 981. 3397075 | 292. 621 | 2127781. 452 |
| M981T703   | 981. 4866779 | 702. 622 | 1594790. 06  |
| M982T291_1 | 981. 7927299 | 291. 076 | 1069471. 771 |
| M982T196_1 | 981. 7943471 | 195. 791 | 817376. 9999 |
| M982T291_2 | 981. 8072987 | 291. 076 | 3268194. 562 |
| M982T179_1 | 981. 8066143 | 179. 046 | 1345360. 426 |
| M982T196_2 | 981. 8071677 | 195. 791 | 2280876. 056 |
| M982T291_3 | 981. 821878  | 291. 076 | 3428299. 371 |
| M982T179_2 | 981. 8285299 | 179. 046 | 1116839. 601 |
| M982T196_3 | 981. 8290477 | 195. 791 | 1733506. 036 |
| M982T290   | 981. 8372521 | 289. 534 | 978735. 1982 |
| M982T294   | 982. 3027617 | 294. 152 | 857074. 9374 |
| M982T197_1 | 982. 3106578 | 197. 335 | 1357260. 301 |
| M982T197_2 | 982. 3316049 | 197. 335 | 325969. 1162 |
| M983T520   | 983. 4372633 | 519. 998 | 445177. 6203 |
| M984T703   | 983. 5403863 | 702. 622 | 737196. 1831 |
| M986T703_1 | 985. 5065235 | 702. 622 | 344095. 3084 |
| M986T703_2 | 985. 5316213 | 702. 622 | 485676. 3176 |
| M988T640   | 987. 5439159 | 640. 057 | 4314666. 717 |
| M989T640   | 988. 5837139 | 640. 057 | 137522. 5088 |
| M989T197_1 | 989. 2865813 | 197. 335 | 18598854. 43 |
| M989T107_1 | 989. 2864179 | 106. 648 | 18158546. 82 |
| M989T190_1 | 989. 2875025 | 189. 717 | 12389375. 18 |
| M989T172_1 | 989. 2905802 | 171. 546 | 2949482. 669 |
| M989T164_1 | 989. 2900936 | 164. 077 | 2194270. 24  |
| M989T206_1 | 989. 2903554 | 206. 399 | 6962222. 906 |
| M989T231_1 | 989. 2902761 | 230. 507 | 3757146. 687 |
| M989T146_1 | 989. 290621  | 146. 08  | 2615177. 253 |
| M989T172_2 | 989. 304894  | 171. 546 | 10788802. 94 |
| M989T197_2 | 989. 3050257 | 197. 335 | 66658024. 45 |
| M989T164_2 | 989. 3048461 | 164. 077 | 8106420. 229 |
| M989T107_2 | 989. 3048625 | 106. 648 | 66621464. 53 |
| M989T206_2 | 989. 305098  | 206. 399 | 25430897. 51 |
| M989T130_1 | 989. 3051519 | 129. 827 | 9537308. 203 |
| M989T190_2 | 989. 3049993 | 189. 717 | 44923169. 22 |
| M989T231_2 | 989. 3050318 | 230. 507 | 13792039. 48 |
| M989T146_2 | 989. 3053789 | 146. 08  | 9500122. 106 |

|            |              |          |              |
|------------|--------------|----------|--------------|
| M989T172_3 | 989. 3270281 | 171. 546 | 11044664. 52 |
| M989T197_3 | 989. 3271596 | 197. 335 | 68717674. 05 |
| M989T164_3 | 989. 3269776 | 164. 077 | 12617665. 28 |
| M989T107_3 | 989. 3269973 | 106. 648 | 70075612. 03 |
| M989T206_3 | 989. 3272179 | 206. 399 | 26498851. 27 |
| M989T130_2 | 989. 3272958 | 129. 827 | 3029386. 406 |
| M989T190_3 | 989. 3271297 | 189. 717 | 46643369. 18 |
| M989T231_3 | 989. 3271668 | 230. 507 | 14195388. 5  |
| M989T146_3 | 989. 3275163 | 146. 08  | 9634335. 912 |
| M989T172_4 | 989. 3453844 | 171. 546 | 3076723. 485 |
| M989T197_4 | 989. 343058  | 197. 335 | 19546222. 82 |
| M989T164_4 | 989. 34334   | 164. 077 | 3497970. 211 |
| M989T107_4 | 989. 3446732 | 106. 648 | 20126014. 5  |
| M989T206_4 | 989. 3434372 | 206. 399 | 7579818. 097 |
| M989T131   | 989. 3454154 | 131. 207 | 701387. 2226 |
| M989T190_4 | 989. 3440232 | 189. 717 | 13435641. 87 |
| M989T231_4 | 989. 3431403 | 230. 507 | 4027408. 158 |
| M989T146_4 | 989. 3437197 | 146. 08  | 2658938. 055 |
| M989T481   | 989. 4816505 | 481. 089 | 386750. 7862 |
| M990T481   | 989. 5095431 | 481. 089 | 218092. 5502 |
| M990T690_1 | 989. 5111629 | 689. 75  | 1290726. 145 |
| M990T706_1 | 989. 5193479 | 705. 593 | 1134024. 568 |
| M990T566   | 989. 5190499 | 566. 042 | 852119. 9594 |
| M990T706_2 | 989. 5414541 | 705. 593 | 1022192. 695 |
| M990T690_2 | 989. 5406836 | 689. 75  | 1905246. 728 |
| M990T197_1 | 990. 2945042 | 197. 335 | 7961804. 889 |
| M990T190_1 | 990. 2945132 | 189. 717 | 5507681. 061 |
| M990T231_1 | 990. 2943744 | 230. 507 | 1621572. 035 |
| M990T107_1 | 990. 3018613 | 106. 648 | 16533666. 16 |
| M990T172_1 | 990. 3089028 | 171. 546 | 4224322. 166 |
| M990T197_2 | 990. 3092825 | 197. 335 | 27620073. 9  |
| M990T164_1 | 990. 3091827 | 164. 077 | 3756572. 063 |
| M990T206_1 | 990. 3092518 | 206. 399 | 10283129. 08 |
| M990T190_2 | 990. 3092868 | 189. 717 | 19186973. 07 |
| M990T231_2 | 990. 3091527 | 230. 507 | 5718666. 873 |
| M990T146_1 | 990. 3090433 | 146. 08  | 3865546. 615 |
| M990T172_2 | 990. 3310282 | 171. 546 | 4104819. 45  |
| M990T197_3 | 990. 3314505 | 197. 335 | 26677667. 16 |
| M990T164_2 | 990. 3313488 | 164. 077 | 5086482. 969 |
| M990T107_2 | 990. 3314163 | 106. 648 | 26665760. 9  |
| M990T206_2 | 990. 3314137 | 206. 399 | 10002218. 62 |
| M990T190_3 | 990. 3314508 | 189. 717 | 18614292. 91 |
| M990T231_3 | 990. 3313244 | 230. 507 | 5434798. 093 |
| M990T146_2 | 990. 3316988 | 146. 08  | 3825229. 742 |
| M990T107_3 | 990. 3464451 | 106. 648 | 6408845. 067 |
| M990T190_4 | 990. 3520993 | 189. 717 | 1530619. 654 |
| M990T197_4 | 990. 3552631 | 197. 335 | 2191095. 386 |
| M990T206_3 | 990. 3564335 | 206. 399 | 623131. 045  |
| M991T704   | 990. 501414  | 704. 046 | 289411. 3189 |
| M991T197_1 | 991. 2859159 | 197. 335 | 484895. 8712 |
| M991T190_1 | 991. 2854975 | 189. 717 | 739845. 1781 |
| M991T197_2 | 991. 3007078 | 197. 335 | 4064423. 531 |
| M991T206_1 | 991. 3007363 | 206. 399 | 1532978. 409 |
| M991T190_2 | 991. 3001446 | 189. 717 | 2772932. 999 |

|            |              |          |              |
|------------|--------------|----------|--------------|
| M991T107_1 | 991. 3084645 | 106. 648 | 7955660. 491 |
| M991T197_3 | 991. 3155012 | 197. 335 | 10622886. 03 |
| M991T206_2 | 991. 3155367 | 206. 399 | 4083311. 64  |
| M991T190_3 | 991. 3149366 | 189. 717 | 7600793. 368 |
| M991T197_4 | 991. 3376964 | 197. 335 | 7078817. 22  |
| M991T107_2 | 991. 3380069 | 106. 648 | 7587113. 445 |
| M991T190_4 | 991. 3371293 | 189. 717 | 5261756. 806 |
| M991T197_5 | 991. 354642  | 197. 335 | 1435440. 681 |
| M991T205   | 991. 3512487 | 204. 895 | 553738. 8415 |
| M991T190_5 | 991. 3508075 | 189. 717 | 1060736. 482 |
| M992T703_1 | 991. 5076082 | 702. 622 | 16596959. 96 |
| M992T720_1 | 991. 5076761 | 719. 505 | 2339780. 375 |
| M992T580   | 991. 5121077 | 579. 883 | 468599. 2346 |
| M992T559_1 | 991. 5106125 | 558. 574 | 25145300. 09 |
| M992T703_2 | 991. 5223987 | 702. 622 | 114206668. 9 |
| M992T720_2 | 991. 5224797 | 719. 505 | 16537193. 99 |
| M992T559_2 | 991. 5231442 | 558. 574 | 83187914. 17 |
| M992T575_1 | 991. 537785  | 575. 222 | 1831012. 892 |
| M992T559_3 | 991. 5378923 | 558. 574 | 210869592. 2 |
| M992T703_3 | 991. 5519956 | 702. 622 | 298579143. 6 |
| M992T720_3 | 991. 5520879 | 719. 505 | 43448392. 39 |
| M992T559_4 | 991. 5600303 | 558. 574 | 136494196. 2 |
| M992T575_2 | 991. 5600477 | 575. 222 | 1182221. 997 |
| M992T703_4 | 991. 5667931 | 702. 622 | 107470771    |
| M992T720_4 | 991. 5668921 | 719. 505 | 15659703     |
| M992T559_5 | 991. 5745572 | 558. 574 | 26846763. 11 |
| M992T205_1 | 992. 308757  | 204. 895 | 522149. 8453 |
| M992T197_1 | 992. 3095854 | 197. 335 | 1394383. 203 |
| M992T197_2 | 992. 3243447 | 197. 335 | 2605266. 663 |
| M992T205_2 | 992. 3231275 | 204. 895 | 1028929. 204 |
| M992T190_1 | 992. 3223259 | 189. 717 | 1755096. 458 |
| M992T197_3 | 992. 3391286 | 197. 335 | 1894154. 167 |
| M992T205_3 | 992. 3379785 | 204. 895 | 758941. 0608 |
| M992T107   | 992. 3404976 | 106. 648 | 1238861. 482 |
| M992T190_2 | 992. 3380144 | 189. 717 | 1310184. 144 |
| M993T703_1 | 992. 5225803 | 702. 622 | 45131430. 75 |
| M993T559   | 992. 5232541 | 558. 574 | 32679513. 72 |
| M993T720_1 | 992. 5225985 | 719. 505 | 6489283. 855 |
| M993T703_2 | 992. 552227  | 702. 622 | 175265503. 5 |
| M993T720_2 | 992. 5522521 | 719. 505 | 26056529. 54 |
| M993T703_3 | 992. 5670512 | 702. 622 | 78024489. 37 |
| M993T720_3 | 992. 5670794 | 719. 505 | 11759649. 65 |
| M993T703_4 | 992. 5817917 | 702. 622 | 10805763. 6  |
| M993T720_4 | 992. 5819084 | 719. 505 | 1570034. 379 |
| M993T220_1 | 992. 640852  | 219. 979 | 157683. 7382 |
| M993T220_2 | 992. 6519721 | 219. 979 | 111446. 4518 |
| M993T220_3 | 992. 9672294 | 219. 979 | 223539. 3058 |
| M993T220_4 | 992. 9894793 | 219. 979 | 202959. 6788 |
| M994T453_1 | 993. 5015827 | 453. 126 | 796206. 6277 |
| M994T703_1 | 993. 5315968 | 702. 622 | 28187777. 61 |
| M994T559_1 | 993. 5323244 | 558. 574 | 20313822. 33 |
| M994T453_2 | 993. 5312826 | 453. 126 | 2171277. 322 |
| M994T453_3 | 993. 5461324 | 453. 126 | 746424. 5189 |
| M994T462   | 993. 5450818 | 462. 446 | 230167. 0817 |



|            |              |          |              |
|------------|--------------|----------|--------------|
| M994T703_2 | 993. 5612853 | 702. 622 | 48077556. 49 |
| M994T559_2 | 993. 561758  | 558. 574 | 32044377. 84 |
| M994T253   | 994. 3269498 | 252. 703 | 116971. 873  |
| M995T453_1 | 994. 505833  | 453. 126 | 329493. 0387 |
| M995T462_1 | 994. 5061163 | 462. 446 | 137120. 3757 |
| M995T546_1 | 994. 5127962 | 546. 308 | 53050192. 43 |
| M995T453_2 | 994. 5343208 | 453. 126 | 993014. 5414 |
| M995T546_2 | 994. 5350943 | 546. 308 | 32075458. 66 |
| M995T462_2 | 994. 5343928 | 462. 446 | 470567. 9309 |
| M995T453_3 | 994. 5492163 | 453. 126 | 363604. 0492 |
| M995T462_3 | 994. 5492018 | 462. 446 | 178463. 373  |
| M995T297_1 | 994. 7949001 | 297. 149 | 613004. 0947 |
| M995T297_2 | 994. 8172063 | 297. 149 | 914012. 6851 |
| M995T252   | 994. 8237303 | 251. 727 | 141283. 1683 |
| M995T297_3 | 994. 8306076 | 297. 149 | 209856. 4427 |
| M998T546   | 997. 5509817 | 546. 308 | 310168. 3655 |
